# Supplementary material for: Performativity and National Identity: Japan’s Domestic Policies
Source: Oxford University Press journal article supplement (doi:10.1158/2159-8290.cd-18-1393), 2007-01-01
Supplement: 21598290cd181393-sup-212867_2_supp_5481622_pqbjqx.xlsx [file 21598290cd181393-sup-212867_2_supp_5481622_pqbjqx.xlsx]

## Sheet: Sheet1
Supplementary Table 1: RNA-seq Normalized Counts of 20954 Tumor Cells 16 hours post treatment with PBS (V), Doxorubicin (D) or Cyclophosphamide (C ) from the spleen (S) or bone marrow (B) (n=3/group)
	VS	VS	VS	VB	VB	VB	DS	DS	DS	DB	DB	DB	CS	CS	CS	CB	CB	CB
MARCH2	4.39025	3.58167	3.92054	4.47187	4.77542	3.93734	4.6226	3.36386	3.26223	4.9292	3.47851	2.97406	3.55906	3.31315	2.81629	3.86977	4.21103	3.6331
MARCH3	3.54233	3.40614	3.4964	4.35224	4.77542	4.25841	3.45303	3.90134	4.06668	4.31173	3.21748	3.77981	3.6572	3.94864	4.45138	3.9567	4.26462	4.20525
MARCH5	6.31376	6.01745	5.91029	6.08966	5.84658	6.64796	6.46064	6.965	6.23816	6.11612	5.76817	5.99315	6.27305	6.60392	6.23209	6.09142	5.49669	5.95563
MARCH6	7.26775	6.99855	6.86681	7.17911	7.03398	7.1332	6.44012	6.834	6.21052	7.41559	6.97182	7.11008	6.74423	6.71196	6.5774	6.7567	7.27778	7.2155
MARCH7	6.49504	6.33185	6.44528	5.91066	6.18233	6.68859	6.09109	6.29384	6.2919	6.46309	6.1139	6.67105	6.61586	6.24703	6.4472	6.25471	5.85214	6.36093
MARCH8	3.36727	4.7581	4.51454	4.87057	5.12624	4.9352	3.45303	3.90134	4.39604	5.27494	4.84157	5.39728	4.06736	3.94864	3.82638	3.86977	4.78821	4.72783
MARCH9	5.44634	5.53176	5.60201	5.31649	4.44179	5.39405	5.89394	4.40183	5.5048	4.61906	5.34566	4.92548	4.82685	5.735	5.39936	4.86522	5.66555	5.08234
SEPT1	5.20734	5.53176	5.30636	5.93168	5.2741	5.10489	5.62972	5.94056	5.71611	4.81301	5.6406	5.43043	5.40893	5.75351	5.28204	5.44866	5.33075	5.19233
SEPT2	7.88658	8.14395	7.89997	7.60262	8.23209	7.77885	8.04826	8.13646	7.63428	7.93658	8.06876	7.88333	7.70916	7.58619	8.11558	8.13259	7.84213	7.53026
SEPT6	8.09762	8.40555	8.26207	8.36393	6.90378	8.3762	8.06176	8.17563	8.17453	8.42627	8.41518	8.26962	8.19915	7.71454	7.82182	8.08996	8.28938	7.93414
SEPT7	9.31298	8.94661	9.11334	8.62172	8.78803	8.77242	9.19386	8.96528	8.89655	9.45841	9.08089	9.26957	9.31229	8.98025	9.27911	9.10407	8.54624	8.82206
SEPT8	4.29562	5.22292	4.99352	5.49656	4.00704	5.48911	5.05925	3.90134	4.664	4.61906	4.53217	5.58564	5.22912	5.9428	5.32222	5.88527	5.58359	5.50101
SEPT9	8.53051	8.71195	8.53636	9.04471	8.00748	8.78184	8.46363	8.67393	8.68187	8.7523	8.44603	8.68807	8.19098	7.86254	7.81127	8.71272	8.44544	8.29936
SEPT11	8.43385	8.05746	8.1813	8.46111	7.83958	8.09317	8.20243	8.07976	8.07075	8.57191	8.29322	8.36701	8.26289	8.18238	8.12413	8.02104	8.26	8.1369
A1BG	7.19096	6.83486	7.66429	7.25612	8.33672	7.57003	7.59847	7.82767	7.34754	6.80474	7.06421	7.31923	7.41163	7.23091	7.39249	7.10003	6.70071	6.92815
A1BG-AS1	1.87289	2.14697	2.28008	3.01141	0	3.39871	2.57909	3.56609	3.02896	0	2.89856	2.97406	2.11066	3.09829	2.5716	1.49358	1.6334	1.88129
AAAS	6.47358	6.62033	5.94081	6.52267	6.35836	6.36012	6.39818	6.62346	6.51166	5.69165	6.13299	6.16055	5.77958	6.37207	5.94099	5.76998	6.10808	6.07532
AACS	4.39025	5.24917	4.43102	4.28849	4.67255	5.10489	4.38561	4.59916	4.7433	4.22346	4.9745	4.43111	5.19685	4.90115	4.93867	5.03464	5.45119	4.96326
AAED1	5.79661	5.46613	5.7472	6.01283	6.51522	5.22022	4.6226	5.78713	5.14481	5.23034	5.69299	5.39728	5.40893	4.83317	4.55617	6.01246	5.70485	5.11063
AAGAB	7.32876	7.22044	7.01757	6.99164	7.76653	7.52588	7.2784	6.91031	7.20075	6.83485	7.00328	6.93634	7.15029	7.28916	7.35425	6.60349	7.09758	6.60918
AAK1	1.87289	3.94501	3.79253	3.83229	3.38183	3.11058	2.57909	3.12858	3.93776	3.01296	3.69947	4.55653	2.36419	3.81405	3.29139	3.77726	3.90845	3.9784
AAMDC	7.45454	6.99079	7.05989	7.3133	7.49229	7.50328	7.37886	7.08509	7.53749	7.42552	7.57754	7.54791	6.99003	7.13536	6.74934	6.78073	6.83074	6.76861
AAMP	6.94816	6.55869	7.05989	7.20524	6.97035	7.34286	7.02643	7.62748	7.21473	7.02964	7.376	6.87746	6.82034	6.78574	6.36304	7.13772	7.24483	7.28543
AAR2	6.71209	6.50524	6.95914	6.40734	6.85763	6.76655	6.65123	6.34972	6.81674	6.6269	5.97272	6.67105	6.31875	6.57299	6.48309	6.37006	6.85715	6.50645
AARS	7.26775	7.37744	7.25466	7.28091	7.29863	6.81629	7.3896	7.03484	7.54857	6.92157	6.63948	7.17998	7.64482	7.7003	7.59874	7.49801	7.69375	7.49313
AARS2	4.85588	4.47635	4.93408	5.49656	3.38183	4.52088	4.88801	5.61541	4.39604	4.39492	4.53217	4.92548	4.73993	4.90115	4.52208	4.86522	5.70485	5.43541
AARSD1	5.95979	5.6742	6.21498	6.39226	6.0242	6.27376	6.44012	6.5774	6.06377	6.40408	6.3926	6.01517	6.46142	6.12441	5.73319	5.64467	5.95351	5.90806
AASDH	5.95979	6.12058	5.87912	5.55191	5.69736	5.91143	5.86344	5.90371	5.90039	5.81759	5.97272	5.52555	5.94416	6.03646	6.5353	5.47835	5.90372	5.93995
AASDHPPT	7.5903	7.34737	7.05989	7.3683	7.81564	7.40106	7.30134	7.18062	7.44564	7.06816	7.35176	7.3542	7.30968	7.45665	7.70512	7.43128	7.12681	7.24133
AATF	7.43247	7.15946	7.03182	7.30527	6.25534	7.0731	7.30134	7.55802	7.29587	7.45489	7.69137	7.5778	7.36156	7.15638	6.97402	7.16536	7.37235	7.32823
ABAT	2.66114	3.40614	2.61888	3.2971	1.52846	4.02455	1.80233	3.90134	1.95043	3.53708	3.06682	3.14357	3.45374	3.40966	4.03417	3.67842	2.17122	2.81539
ABCA1	4.29562	4.47635	4.14681	5.60522	4.00704	5.32701	3.87608	3.12858	3.02896	5.36021	4.93154	5.05866	3.6572	3.58523	3.82638	3.77726	4.50622	5.05348
ABCA10	1.22115	1.24585	0	0	0	0	1.16601	1.35002	1.28241	0	1.9135	0	1.41113	1.90711	2.4317	1.49358	0	0.740719
ABCA11P	4.64177	5.08398	4.80733	5.49656	4.67255	4.18459	4.69366	4.99923	4.29438	4.87227	5.05676	4.43111	4.86842	5.05828	5.38046	4.32672	4.92762	4.72783
ABCA12	1.22115	0	0	1.86743	0	0.96692	1.16601	1.35002	2.40527	1.74734	1.50833	1.9778	1.41113	1.2481	1.06958	0.932009	1.6334	0.740719
ABCA5	1.22115	3.30966	3.12336	2.8441	2.25386	1.54069	1.16601	0	2.40527	3.53708	1.9135	2.78195	3.45374	3.40966	3.11964	2.87883	4.03719	1.88129
ABCA7	4.08542	4.68305	3.79253	3.83229	1.52846	2.9416	3.27908	4.04365	3.79618	4.12943	3.79843	3.29524	2.93316	4.43491	3.76939	3.67842	3.43448	3.3777
ABCB1	5.25841	5.55299	4.99352	4.73364	5.64398	5.68922	5.89394	5.06747	5.08518	5.93342	5.27867	6.01517	5.71268	5.9428	5.76269	5.64467	6.33793	5.89185
ABCB10	5.44634	5.55299	5.91029	5.82337	5.47086	6.14344	5.21231	5.47172	5.5048	6.14043	5.55827	6.25611	6.14358	5.92659	6.5353	6.05248	6.16555	6.42992
ABCB4	5.15439	4.28661	4.14681	5.11069	5.12624	4.4596	4.7614	5.19497	4.39604	4.61906	3.89103	3.55778	3.6572	4.43491	4.12782	4.18988	3.8395	4.83347
ABCB6	3.16799	2.97415	3.3219	3.16132	3.09409	2.9416	3.27908	2.84732	3.02896	2.18145	0.942911	3.97219	2.36419	3.66561	2.92465	3.67842	3.52509	3.06714
ABCB7	6.4297	6.79977	6.13806	6.48049	6.70961	6.42568	6.63327	6.85346	6.51166	6.42402	6.63948	6.38006	5.96347	6.56253	6.58568	6.35413	5.86954	5.75515
ABCB8	1.87289	1.61229	1.83648	2.43688	1.52846	0	2.24237	1.35002	2.75056	0	0.942911	1.9778	2.36419	1.90711	1.06958	0	2.37986	1.59121
ABCC1	5.20734	5.59454	5.30636	5.25109	4.16696	4.02455	5.55535	5.52122	5.08518	5.51698	5.40967	5.58564	5.13006	5.51402	4.96428	5.11243	5.92051	5.02403
ABCC10	2.66114	3.40614	4.14681	3.73997	0	1.95009	4.20279	4.29203	3.02896	3.20959	3.35389	2.97406	2.76725	3.09829	3.64819	2.4698	3.61034	3.06714
ABCC3	2.32019	1.61229	0	1.46774	0	1.95009	2.57909	1.35002	2.75056	2.78523	1.50833	3.14357	1.80289	1.61491	1.40503	0.932009	2.37986	1.88129
ABCC4	4.71673	4.56262	2.89306	3.91906	4.31091	3.93734	3.99339	4.50386	3.93776	3.38261	4.64284	3.29524	3.21681	3.31315	3.71006	4.77241	2.86934	4.69083
ABCC5	4.19434	4.8974	4.93408	3.64134	1.52846	3.7453	3.60824	4.50386	4.06668	4.54814	4.34841	2.78195	4.20353	2.84574	3.98496	4.18988	3.61034	4.03854
ABCD2	1.87289	3.09486	3.4964	1.46774	2.7343	2.5294	2.57909	2.4976	3.93776	2.18145	1.50833	2.78195	1.80289	1.90711	3.20807	0	0	2.32943
ABCD3	6.31376	6.54816	6.48724	6.19773	6.83399	6.39327	6.50083	5.82704	5.96798	5.55364	6.3926	6.41361	6.47494	6.61408	6.34365	5.86294	6.50309	5.82512
ABCD4	5.68903	4.64401	4.93408	5.3481	6.2193	5.0643	5.43606	5.42045	5.71611	5.47935	5.0962	4.87821	5.19685	5.55679	4.98945	5.76998	5.40422	5.08234
ABCE1	8.03309	7.9415	7.82833	7.71601	8.21389	7.28221	7.89083	7.69375	7.71519	7.74379	7.70418	7.91881	7.96531	7.61684	8.07794	7.95395	7.52836	7.63625
ABCF1	7.87844	8.03877	7.90772	8.27626	6.51522	8.24616	8.13381	7.86649	8.08604	8.38617	8.34324	8.16518	8.11961	8.22941	7.73147	8.50488	8.29904	8.36542
ABCF2	7.22986	7.22706	7.08743	6.85527	6.62949	6.53368	7.18283	6.7114	6.79829	6.55638	6.66593	6.61448	6.88254	6.62417	7.0597	6.81603	6.72002	6.74173
ABCF3	3.36727	3.8793	4.14681	3.64134	4.00704	3.63876	3.99339	4.59916	4.81846	3.80381	4.53217	4.55653	4.86842	3.58523	3.71006	3.67842	4.55004	4.2568
ABCG1	3.36727	1.90426	0	3.83229	1.52846	3.26183	3.08125	1.35002	1.28241	3.38261	3.21748	2.56027	1.41113	1.2481	2.27675	2.68876	3.23415	3.6331
ABHD10	6.51618	6.87756	7.14098	6.8331	7.9091	7.12336	7.2314	7.24096	6.9056	6.51979	6.43935	6.54049	7.09006	7.51205	7.61904	6.74454	6.64118	7.08611
ABHD11	4.08542	3.73815	4.99352	5.25109	4.56178	3.52372	3.99339	4.50386	4.29438	4.98396	4.74563	4.29375	4.49652	4.3883	4.88603	4.77241	3.76708	4.86703
ABHD12	5.79661	5.78601	5.78133	5.8007	4.77542	5.18279	5.21231	5.52122	5.5048	5.72418	5.99375	5.58564	5.59378	5.14494	5.32222	5.47835	5.56235	5.68161
ABHD13	4.78798	5.39738	5.81467	4.35224	6.18233	5.91143	4.7614	5.06747	4.491	4.68665	5.01622	5.82882	4.94814	5.92659	5.39936	5.81721	5.76186	5.19233
ABHD14A	5.04229	4.28661	4.2479	5.37904	5.93812	5.29229	5.35068	5.06747	5.67626	5.62429	4.7944	5.25649	4.78404	4.64774	4.65386	3.9567	5.02399	5.11063
ABHD14A-ACY1	6.36126	5.83882	6.0844	5.40933	6.2905	6.00018	6.46064	5.82704	5.63526	5.62429	5.74354	5.64333	5.51744	5.30407	5.74801	4.25992	4.75114	5.52223
ABHD14B	6.91671	6.96727	6.52801	6.48049	5.89308	6.81629	6.50083	6.60062	6.66208	6.59208	6.62607	6.94784	6.16041	6.24703	6.05267	6.11051	6.56847	6.64831
ABHD15	6.69366	7.13854	7.04593	7.28907	6.2905	7.30852	6.48087	6.6681	6.1536	7.33363	7.19711	7.47828	6.27305	6.57299	6.12259	6.76876	6.73907	7.31004
ABHD16A	5.79661	6.36823	5.39719	6.23203	6.25534	5.71567	5.73455	5.78713	6.26528	5.96098	6.29429	5.99315	6.14358	6.4192	6.67372	6.33803	6.56847	6.14537
ABHD17A	4.98279	5.16894	5.10551	3.91906	4.31091	3.93734	5.66552	5.61541	4.81846	4.31173	3.47851	4.97126	4.78404	4.43491	4.58947	3.67842	4.85959	4.03854
ABHD17B	6.10638	6.36823	6.31156	6.03242	6.88089	6.5776	6.39818	6.23571	6.12427	6.5382	6.51405	6.79076	6.25748	6.27292	6.52672	6.53451	6.38708	6.56896
ABHD17C	3.83928	4.00786	2.61888	3.73997	5.0462	3.7453	2.57909	3.12858	4.491	3.6766	4.84157	3.67306	4.5486	4.18515	3.51586	3.67842	4.46103	4.76391
ABHD18	5.44634	4.9937	5.10551	4.99562	5.34271	5.10489	5.35068	5.3673	5.54962	5.23034	5.76817	4.14191	5.75762	5.57772	5.97918	5.18623	5.38014	5.89185
ABHD2	3.69843	4.18148	5.39719	4.99562	3.82716	4.74286	5.05925	4.40183	5.08518	5.81759	5.37802	5.69881	4.49652	3.31315	4.45138	4.77241	5.30541	5.05348
ABHD3	6.26464	6.06255	6.28801	5.88933	6.39112	6.40957	6.37674	6.29384	6.21052	6.18786	6.20691	5.72576	6.73302	6.70246	7.12361	6.74454	6.80385	6.81234
ABHD4	0	0	1.83648	1.46774	0	0	0	0	1.28241	0	0.942911	2.56027	2.93316	0.755007	0	1.49358	1.26401	0
ABHD5	5.25841	5.37371	5.35249	5.3481	6.45451	4.97953	5.25992	4.50386	4.18502	5.27494	5.31255	5.3286	5.71268	5.95884	5.68778	5.32341	5.74311	5.41287
ABHD6	4.39025	3.66203	3.79253	0.912987	3.82716	2.9416	4.54784	3.56609	3.79618	3.38261	3.47851	3.43247	4.06736	3.74174	3.20807	4.56671	4.03719	3.3777
ABHD8	2.93671	3.20625	2.61888	3.2971	0	2.26863	3.45303	3.90134	3.26223	3.38261	3.35389	3.14357	2.57975	3.50011	3.11964	3.9567	4.46103	3.78127
ABI1	7.47627	7.46963	6.78507	7.11623	7.09492	7.25542	7.41085	6.91031	7.26933	6.59208	7.00328	7.2373	6.95186	7.0851	7.35425	6.8618	6.76719	6.58921
ABI2	5.83076	6.54816	6.21498	6.24888	6.18233	6.54847	5.59301	6.32205	5.93458	6.38386	6.51405	6.72548	6.09186	6.15258	6.21084	6.70742	6.547	6.54842
ABL1	5.53185	5.95502	4.8721	5.439	3.62161	5.36092	4.82609	5.42045	5.08518	5.75599	5.20843	5.18058	4.82685	5.61867	4.91259	5.5639	5.49669	5.45761
ABL2	4.85588	3.8793	3.4964	4.63456	4.16696	4.10679	4.88801	3.36386	4.58009	4.98396	4.93154	4.14191	4.73993	3.31315	4.65386	4.4517	5.30541	5.24434
ABLIM1	5.68903	5.78601	5.44054	6.23203	5.40821	5.95649	4.29709	5.9765	5.20207	5.5894	5.40967	6.07928	4.5486	4.2903	3.76939	4.77241	4.85959	4.99396
ABLIM2	3.83928	3.58167	3.3219	3.53547	4.31091	3.26183	4.20279	4.29203	2.75056	3.38261	4.13777	1.9778	3.6572	3.31315	4.37703	4.25992	4.50622	4.2568
ABR	3.16799	3.20625	2.89306	4.4133	2.7343	3.11058	2.85191	3.12858	4.491	3.80381	4.06012	4.14191	3.83548	4.0115	3.76939	3.45776	4.31628	3.6331
ABRACL	9.65783	9.20983	9.64511	9.62796	10.3708	9.68803	9.84588	10.0036	10.1178	9.39163	9.39539	9.51918	9.43497	9.66485	9.65147	9.38049	9.17609	9.30014
ABT1	7.51878	6.95136	6.75104	7.32129	7.55147	7.2998	7.64404	7.38162	7.14343	6.96305	6.95046	6.99292	6.92256	6.95522	7.20645	7.20141	6.8484	6.99038
ABTB1	3.54233	4.60389	3.92054	4.28849	4.31091	4.10679	3.08125	4.40183	4.491	4.87227	3.97805	3.29524	3.74909	3.74174	3.44485	4.72367	3.69084	3.9784
ACAA1	5.57278	5.55299	5.35249	5.1826	5.98181	5.0643	5.66552	5.78713	5.7549	4.81301	5.44064	5.293	5.02368	5.61867	4.68501	4.51035	5.19933	5.16561
ACAA2	8.57652	8.53388	8.8615	8.51434	9.00996	8.7974	8.72768	8.73815	8.82088	8.59847	8.41907	8.66736	8.86566	8.60299	8.69976	8.60583	8.56505	8.59054
ACACA	4.71673	4.1259	4.73951	4.87057	3.09409	4.9352	4.54784	4.99923	4.58009	4.31173	4.53217	4.21982	4.44249	4.3883	4.12782	5.1498	5.27961	5.21857
ACACB	1.22115	0	2.28008	3.83229	0	1.54069	1.80233	0	3.02896	1.12347	1.9135	2.78195	1.41113	2.14998	1.67701	2.21155	2.37986	2.81539
ACAD10	1.87289	3.20625	3.12336	3.4212	2.25386	3.11058	2.24237	3.90134	4.18502	3.20959	2.48852	1.9778	3.34013	3.50011	2.10315	2.4698	3.43448	2.81539
ACAD11	1.22115	2.97415	4.03811	3.01141	2.7343	2.75017	3.08125	3.74343	3.79618	2.18145	2.48852	3.43247	3.21681	3.09829	3.71006	3.19714	2.86934	1.88129
ACAD8	5.15439	4.9937	5.78133	4.95513	5.40821	5.32701	5.21231	4.92761	5.71611	5.08761	4.88726	5.3286	5.35145	5.19996	6.59391	5.81721	5.58359	5.21857
ACAD9	5.65131	5.88977	5.81467	6.29827	6.48518	6.36012	6.77109	6.7114	5.96798	6.18786	6.36057	6.57054	5.90474	6.63419	5.92803	6.16629	6.37495	6.76861
ACADM	8.23145	8.05001	8.35564	8.2388	8.33672	8.13297	8.06176	8.37055	7.66516	8.03062	8.11749	8.24188	8.52903	8.16174	8.41631	8.37675	7.86832	7.97704
ACADS	1.87289	2.35466	1.19263	3.16132	1.52846	1.54069	3.08125	2.03503	2.75056	2.78523	0.942911	2.97406	1.41113	2.70069	0.631718	2.4698	3.61034	3.3777
ACADSB	4.29562	4.60389	4.2479	4.28849	4.44179	4.79341	4.469	4.29203	4.58009	4.47356	4.74563	4.05954	5.09546	4.83317	4.41469	4.72367	3.23415	4.2568
ACADVL	3.36727	5.34965	4.51454	5.1826	4.16696	4.69049	5.21231	5.56908	5.45856	4.54814	4.74563	4.21982	4.26708	5.30407	5.45463	4.86522	5.22659	4.49008
ACAP1	2.66114	0.753427	1.83648	2.43688	2.25386	2.75017	2.85191	2.4976	3.02896	1.74734	0	2.78195	2.76725	3.40966	1.67701	1.49358	0.766223	2.94675
ACAP2	7.05313	6.99855	7.17988	7.13447	6.80996	6.84053	6.95591	6.947	6.57805	7.33363	7.20615	7.49404	7.27146	6.74932	7.05374	6.64334	7.25148	7.27921
ACAP3	3.16799	2.6974	2.28008	1.86743	2.25386	1.54069	2.24237	3.12858	1.28241	2.5147	1.50833	0.985236	3.21681	3.20972	2.81629	2.21155	3.43448	3.17825
ACAT1	7.13739	7.4185	7.32576	7.77536	7.41473	7.40918	7.7562	7.22611	7.00549	7.30165	7.07412	7.54791	7.29451	7.32672	7.30998	7.60953	7.29076	7.32219
ACAT2	8.04041	7.75257	7.67341	8.04984	8.76946	8.19068	8.16541	7.77762	7.81032	8.05	8.01318	8.12017	8.12819	8.34681	8.24662	8.46094	8.27965	8.33277
ACBD3	5.83076	5.82143	6.13806	6.18027	5.20206	5.39405	5.47693	5.42045	6.03254	5.90532	5.74354	6.38006	5.29158	6.06638	6.14517	6.52031	6.12266	6.3008
ACBD4	2.32019	2.8424	2.28008	2.65481	1.52846	1.54069	2.24237	1.35002	2.75056	3.92071	2.48852	0.985236	2.36419	2.35779	3.11964	2.4698	1.92723	3.06714
ACBD5	5.04229	5.37371	4.99352	4.58234	5.47086	4.18459	2.85191	4.29203	5.20207	4.61906	4.53217	4.77874	4.38636	4.68678	4.62203	4.90947	4.31628	4.72783
ACBD6	7.54987	6.86063	7.41541	7.19658	7.49229	7.20963	7.19513	6.85346	7.32194	7.59341	7.34359	7.26513	7.48028	6.88141	7.0891	7.64268	7.4895	7.24771
ACBD7	4.78798	4.86381	4.34236	4.15185	2.7343	4.52088	3.45303	4.29203	3.46298	5.18432	4.06012	4.49518	3.55906	4.76183	3.82638	4.56671	3.76708	3.6331
ACCS	2.32019	2.97415	3.3219	0	2.7343	2.26863	3.27908	3.56609	4.58009	3.38261	0.942911	2.29823	2.11066	2.84574	2.10315	3.04674	2.86934	1.22775
ACD	6.49504	6.30707	6.42384	6.95104	6.57348	6.60616	6.59665	6.11192	6.34371	6.04064	6.62607	6.43009	6.94216	6.82127	6.48309	6.7567	6.56847	6.59923
ACER2	3.36727	0.753427	1.19263	1.86743	3.09409	0.96692	3.08125	2.03503	2.75056	2.18145	0	2.29823	3.21681	2.97754	2.27675	2.4698	3.23415	2.51022
ACER3	4.64177	5.14117	4.51454	5.25109	4.56178	4.74286	5.35068	4.40183	5.02298	4.54814	4.93154	4.43111	5.86421	4.83317	5.57591	4.90947	5.4279	5.26965
ACIN1	8.91967	8.9685	9.0092	8.4319	5.84658	8.40086	8.65831	8.72764	8.39314	9.30825	9.11968	8.71522	9.12989	8.55632	8.70926	8.8833	8.91635	8.94107
ACKR4	1.22115	1.61229	1.19263	1.86743	3.38183	1.54069	1.80233	1.35002	1.28241	2.5147	1.9135	2.56027	2.11066	0	1.90575	1.49358	1.92723	1.22775
ACLY	7.32876	7.26615	7.03182	7.00162	6.92631	7.24638	7.11971	7.08509	6.7796	6.87886	7.05424	6.71207	6.91266	7.0024	6.87621	7.0808	7.29076	6.88785
ACO1	3.16799	3.49658	3.12336	4.07835	3.82716	3.52372	3.27908	0	3.02896	3.92071	4.21145	3.77981	3.21681	2.14998	2.27675	4.62095	3.43448	4.2568
ACO2	7.49768	7.87983	7.56983	7.49375	6.57348	7.31718	7.88325	7.27021	7.66516	7.31239	7.71689	7.50186	7.19182	7.58619	7.31994	7.03159	7.2581	7.61665
ACOT1	2.66114	3.20625	2.28008	3.16132	2.25386	3.39871	2.57909	2.4976	2.75056	2.18145	1.50833	0.985236	1.80289	1.61491	3.20807	2.4698	2.86934	2.12269
ACOT13	8.15939	8.29963	8.38922	8.15637	9.23872	8.67132	8.83375	8.77433	8.79785	7.9504	8.28897	8.34979	8.20322	8.1408	8.49311	7.9056	7.91933	8.10209
ACOT2	4.08542	4.60389	4.2479	5.40933	5.74884	4.84224	4.54784	4.68854	5.14481	4.22346	4.21145	3.97219	4.38636	4.2903	4.74536	4.11626	4.03719	4.53252
ACOT4	0	0	1.83648	1.86743	0	1.54069	0	2.84732	0	1.12347	0.942911	0.985236	1.41113	2.14998	0	1.49358	0.766223	0.740719
ACOT7	7.09587	7.14555	7.10101	7.01152	6.39112	7.08329	7.19513	7.27021	7.28266	7.35456	7.36796	6.92476	7.31721	7.0851	7.07741	6.46207	7.04496	7.25407
ACOT8	6.23944	6.33185	6.21498	6.08966	6.88089	6.00018	6.63327	6.68991	6.44206	6.18786	5.9297	5.80374	6.12654	6.26003	6.28387	5.44866	5.83453	6.0896
ACOT9	5.76163	6.50524	6.13806	5.73046	6.57348	5.76716	5.95307	6.26507	6.44206	5.84743	5.71849	5.82882	6.17705	6.08111	6.33386	5.69611	5.56235	5.58408
ACOX1	4.47905	5.44358	4.8721	5.3481	5.0462	5.22022	5.43606	5.47172	5.08518	4.68665	5.0962	5.3286	4.86842	4.56634	5.38046	5.44866	5.14322	5.87546
ACOX2	0	0.753427	1.83648	1.86743	1.52846	2.26863	3.08125	1.35002	1.95043	2.78523	0	0.985236	1.80289	1.2481	2.10315	1.89677	1.6334	1.22775
ACOX3	3.54233	3.8793	3.92054	4.47187	2.7343	4.57966	4.10189	3.90134	3.63918	3.38261	3.06682	3.43247	3.99413	4.2903	3.51586	2.21155	3.43448	3.85002
ACOXL	3.16799	3.40614	3.92054	4.0009	3.38183	3.84451	2.24237	2.4976	2.40527	3.80381	4.88726	4.05954	3.08194	3.58523	2.4317	4.03868	3.61034	3.28142
ACP1	8.84645	8.85129	9.00198	8.91877	9.72024	9.26409	9.2916	9.35819	9.20392	9.06326	8.97645	8.79375	9.09529	9.06419	9.18147	8.9297	8.84998	8.64234
ACP2	4.71673	4.47635	4.51454	4.0009	2.7343	4.63614	3.87608	3.90134	3.93776	4.87227	4.21145	4.77874	3.74909	3.94864	4.03417	4.90947	4.26462	3.55289
ACP5	0	0	0	2.43688	0	2.9416	1.80233	2.03503	1.95043	3.01296	1.9135	2.29823	1.41113	0.755007	1.40503	0.932009	0	1.59121
ACP6	4.78798	4.9937	4.2479	4.58234	5.89308	4.4596	4.88801	2.84732	4.95798	4.61906	5.44064	5.01562	3.91699	4.07174	3.64819	4.4517	4.67403	4.57376
ACSBG1	1.22115	0.753427	1.83648	0.912987	1.52846	1.54069	3.27908	1.35002	1.95043	1.74734	1.9135	0.985236	0	2.84574	2.4317	1.89677	0.766223	1.59121
ACSF2	2.32019	3.30966	3.79253	2.8441	2.7343	2.26863	3.74836	2.84732	3.46298	3.01296	2.48852	3.29524	3.34013	2.84574	3.76939	1.49358	1.6334	3.91563
ACSF3	5.09943	4.7581	5.10551	4.52817	3.38183	4.25841	4.69366	4.04365	4.39604	4.54814	4.28155	4.72632	4.90883	5.53556	4.80328	4.03868	4.59256	4.61384
ACSL1	2.66114	2.53619	2.28008	3.83229	2.25386	2.9416	2.24237	0	3.02896	3.01296	3.69947	1.9778	1.80289	2.70069	2.92465	2.21155	4.03719	3.28142
ACSL3	6.93252	6.58984	6.1898	6.97148	6.78552	6.80401	6.37674	6.07924	6.00062	7.17793	6.97182	6.95924	6.5016	6.72139	6.55229	6.90616	6.99034	6.81234
ACSL4	6.61746	5.65469	6.11148	6.23203	5.74884	6.00018	5.73455	5.47172	5.08518	6.18786	6.4546	5.87771	6.10931	6.03646	6.58568	6.09142	6.31272	6.38429
ACSL5	6.07823	6.2562	5.48263	5.73046	6.62949	5.66228	6.53992	6.52982	6.12427	6.16434	5.95137	6.18018	5.66629	5.78982	6.01639	5.86294	5.64549	6.18583
ACSM3	3.96759	3.66203	4.03811	3.64134	2.25386	4.25841	4.20279	4.99923	3.46298	4.12943	3.79843	4.21982	5.29158	4.68678	4.41469	5.35575	4.78821	4.76391
ACSS1	6.55755	6.88595	6.76815	6.9407	6.25534	6.50364	6.44012	6.92877	6.74148	6.57434	6.93966	6.64304	6.28844	6.58337	6.27366	6.7567	7.03728	6.485
ACSS2	2.32019	2.97415	2.61888	2.18007	2.7343	3.63876	2.57909	4.29203	2.75056	3.20959	2.22947	3.43247	2.11066	3.09829	3.11964	2.87883	3.76708	2.67086
ACTB	10.9796	10.7438	10.7395	11.1536	11.2096	11.1278	10.5767	10.7884	10.8986	10.7762	10.8216	10.8453	10.5196	10.6996	10.4085	10.7372	10.771	10.609
ACTG1	11.4475	11.4732	11.3771	11.7724	11.6462	11.6746	11.2455	11.2578	11.407	10.9305	11.0838	11.1515	11.3921	11.7473	11.5357	11.4018	11.5241	11.4487
ACTG1P17	0	1.61229	2.28008	1.86743	0	2.26863	1.16601	2.03503	1.28241	1.74734	2.22947	0	0.871627	1.2481	1.40503	0	1.6334	0
ACTG1P20	7.21701	7.53511	7.29065	7.74004	7.47711	7.88754	7.51263	7.55802	7.60274	7.06816	7.15104	7.43809	7.5712	7.92102	7.63906	7.5756	7.4782	7.57664
ACTL6A	8.31826	8.27429	8.70585	8.38314	8.97256	8.44105	8.33616	8.60098	8.41147	7.95726	8.27185	8.19442	8.27066	8.15479	8.64537	8.01092	8.16456	8.04825
ACTL8	0	0	0	0	0	0	0	2.84732	0	0	0	0	0	0	0	0	0	0
ACTN1	3.36727	4.00786	3.12336	3.83229	2.25386	3.84451	3.74836	2.84732	3.26223	3.92071	2.22947	2.97406	2.76725	3.09829	2.4317	2.4698	3.33779	3.70909
ACTN4	7.38729	7.82417	7.31415	7.43607	4.96146	7.32579	7.61687	7.97707	7.26933	7.94351	7.78484	7.47828	7.49362	7.52287	7.29995	7.74392	7.81544	7.43837
ACTR10	5.83076	5.71244	5.71225	5.82337	6.90378	5.68922	5.86344	6.50543	6.48883	5.93342	5.58624	6.03686	5.43683	6.09569	6.4742	5.88527	5.38014	5.41287
ACTR1A	6.97894	7.64299	7.36003	7.65412	7.59431	7.56277	7.41085	7.40818	7.66516	7.14226	7.39983	7.69838	7.36882	7.32053	6.93569	7.15621	7.1905	7.1213
ACTR1B	6.28941	6.86912	6.73371	6.28199	6.78552	6.45737	6.33289	5.86588	6.7796	6.72661	6.31114	6.07928	6.73302	6.93914	6.16739	6.68213	6.72002	6.40729
ACTR2	9.48901	9.53327	9.43072	9.63598	9.38417	9.52561	9.31433	9.24119	8.96845	9.43158	9.52387	9.45418	9.26249	9.31997	9.37891	9.39028	9.24936	9.35587
ACTR3	8.38298	8.44583	8.40572	8.42079	8.53301	8.69145	8.11451	8.02933	8.34946	8.21361	8.30168	8.37129	8.47287	8.58502	8.4887	8.38853	8.315	8.30549
ACTR3B	1.87289	3.73815	3.92054	3.91906	2.7343	2.75017	2.24237	2.03503	3.63918	3.01296	2.89856	2.56027	3.55906	3.88292	2.10315	1.49358	3.52509	3.9784
ACTR3C	2.32019	2.35466	3.79253	3.64134	3.09409	2.26863	3.60824	2.03503	3.02896	1.74734	2.48852	1.56524	2.11066	2.14998	3.11964	2.68876	2.37986	1.88129
ACTR5	3.54233	4.23501	4.34236	4.58234	5.20206	3.39871	4.82609	4.59916	4.95798	3.38261	4.47348	4.61537	3.34013	4.0115	4.33838	4.11626	4.82434	4.09628
ACTR6	7.50827	7.43002	7.74432	7.2309	7.77897	7.38467	7.7395	7.98591	7.79179	7.45489	7.34359	7.56293	7.01801	7.4396	7.56983	7.28777	6.99034	7.13514
ACTR8	6.36126	6.28186	5.67643	6.23203	5.74884	6.04258	6.53992	5.70382	6.48883	5.72418	6.22482	6.73878	6.64006	6.40756	6.27366	6.38581	6.1371	6.54842
ACTRT3	1.22115	2.8424	1.19263	2.18007	0	1.95009	1.80233	0	2.75056	1.74734	3.21748	0.985236	1.80289	1.90711	1.90575	2.68876	1.26401	2.51022
ACVR1B	2.66114	2.35466	1.19263	1.86743	1.52846	3.52372	1.80233	1.35002	3.02896	3.20959	4.21145	3.43247	2.76725	2.5394	2.81629	1.89677	3.8395	4.49008
ACVR2A	1.87289	2.97415	2.61888	3.01141	3.09409	1.54069	2.85191	3.12858	3.63918	1.12347	2.48852	3.67306	2.57975	2.70069	3.02544	3.04674	1.92723	2.81539
ACVR2B	4.78798	4.06809	4.80733	5.37904	4.31091	4.79341	3.45303	3.90134	4.664	4.81301	5.66703	5.49453	4.90883	3.74174	4.62203	5.03464	5.56235	5.26965
ACVR2B-AS1	1.22115	1.90426	0	2.8441	0	1.54069	0	3.12858	2.75056	3.01296	3.59321	2.29823	2.11066	2.5394	1.67701	3.19714	2.5621	1.22775
ACY1	6.36126	5.83882	6.0844	5.37904	6.2905	6.00018	6.44012	5.78713	5.63526	5.62429	5.74354	5.64333	5.51744	5.30407	5.74801	4.25992	4.75114	5.52223
ACY3	6.69366	5.6742	6.31156	5.82337	5.58855	5.02254	6.26451	6.07924	6.2919	6.25619	5.55827	5.52555	5.06002	5.25295	5.54229	5.50743	5.25335	4.93189
ACYP1	6.13399	6.44972	6.58708	6.70465	6.54465	6.47296	7.06715	7.28462	7.39743	6.99005	6.79137	6.92476	7.14184	7.24406	7.11792	6.99098	6.90855	6.28847
ACYP2	7.85374	7.56676	7.43698	6.87711	7.74134	7.46482	7.47277	8.1285	7.74439	6.80474	6.95046	7.16035	7.29451	6.92288	7.51021	6.65639	6.46926	6.49576
ADA	8.31826	8.17166	8.39474	8.57905	8.59057	8.29522	8.33616	8.53624	8.62018	8.16703	8.32676	8.20882	7.99845	7.8497	7.89691	7.71927	7.88553	7.57156
ADAL	5.20734	4.9937	5.25871	5.07334	4.00704	5.10489	5.1121	4.92761	5.08518	4.98396	4.58857	5.36335	5.13006	5.14494	5.70307	4.4517	5.27961	5.58408
ADAM10	6.94816	6.47219	6.52801	6.89862	7.05458	6.97798	6.72094	6.50543	6.62068	6.6269	6.55708	6.95924	6.66387	6.81247	6.4104	6.58995	6.56847	7.14885
ADAM15	1.87289	1.90426	1.83648	2.18007	2.25386	2.75017	2.24237	1.35002	3.46298	0	1.50833	0.985236	2.57975	2.5394	2.69913	1.89677	2.17122	1.88129
ADAM17	6.55755	6.43836	5.97069	6.43705	6.99187	6.9336	6.73785	6.42967	6.12427	6.69414	6.18878	6.77794	6.48833	6.37207	6.4104	6.21999	6.547	6.51706
ADAM19	3.54233	1.61229	3.79253	3.91906	3.38183	2.75017	1.16601	2.4976	3.79618	2.18145	1.50833	2.29823	2.57975	3.50011	3.29139	3.04674	3.52509	2.32943
ADAM1A	4.29562	4.06809	4.03811	3.91906	3.38183	4.25841	3.74836	3.36386	3.02896	2.78523	3.79843	2.78195	3.21681	2.35779	2.4317	3.77726	4.03719	4.09628
ADAM22	3.36727	3.09486	3.79253	4.0009	1.52846	1.54069	0	0	3.02896	1.74734	3.21748	1.9778	1.80289	2.14998	3.44485	3.04674	3.52509	3.17825
ADAM23	5.9286	5.30028	5.84725	5.5245	4.96146	5.36092	5.51667	5.52122	5.5048	5.96098	5.9077	5.18058	5.4642	5.99039	5.28204	5.76998	5.68533	5.97115
ADAM32	2.66114	2.53619	2.61888	0.912987	1.52846	0.96692	2.24237	2.03503	2.75056	1.12347	3.06682	0.985236	2.11066	2.35779	1.90575	0.932009	1.26401	2.51022
ADAM9	5.04229	4.72106	3.3219	4.73364	4.00704	4.10679	2.85191	3.74343	4.18502	5.08761	5.27867	3.77981	5.26069	4.7248	4.52208	5.18623	5.02399	5.52223
ADAMTS6	1.22115	1.90426	1.19263	2.8441	4.16696	1.54069	3.45303	2.84732	0	1.12347	2.22947	3.55778	2.11066	1.61491	2.27675	1.49358	2.5621	1.88129
ADAR	7.65843	7.37147	7.08743	7.2224	5.20206	6.97798	6.78743	6.92877	6.9056	7.57569	7.47655	7.17998	6.97107	7.29549	6.88294	7.78607	7.36009	7.48234
ADARB1	2.32019	3.58167	2.89306	3.83229	2.7343	3.26183	2.85191	3.56609	1.28241	4.39492	3.47851	3.87921	2.76725	1.61491	2.81629	3.19714	4.15538	3.3777
ADARB2	3.96759	3.49658	2.61888	2.43688	2.7343	3.84451	3.74836	2.03503	4.18502	2.78523	3.89103	3.77981	2.93316	3.40966	3.58354	4.51035	3.23415	2.51022
ADARB2-AS1	5.72579	5.55299	6.42384	6.45168	6.25534	6.64796	5.80043	6.62346	6.21052	6.40408	5.9077	6.14066	5.40893	4.60761	5.5592	5.76998	5.19933	5.79056
ADAT1	6.31376	6.50524	6.26408	6.91982	6.14439	6.75385	6.39818	6.37686	6.31804	5.87667	6.58507	6.31054	6.5016	6.13856	6.29401	6.01246	6.16555	6.51706
ADAT2	5.09943	4.82943	4.80733	4.52817	5.64398	5.18279	4.6226	4.40183	5.36136	4.22346	4.9745	5.18058	4.49652	3.74174	4.85897	4.51035	4.41437	4.49008
ADAT3	0	2.97415	1.83648	0	0	1.54069	3.74836	2.84732	3.46298	1.12347	1.50833	2.97406	2.57975	1.61491	2.10315	1.89677	3.00146	2.67086
ADCK1	2.32019	2.35466	0	2.65481	0	2.26863	1.80233	2.03503	2.75056	2.18145	0.942911	0.985236	0	1.61491	1.67701	0	2.17122	3.28142
ADCK2	6.93252	7.08853	6.89825	6.91982	6.35836	7.02103	6.48087	6.947	7.08374	6.69414	6.43935	6.98178	7.02721	7.01012	7.2383	6.92783	7.36623	7.37563
ADCK5	1.87289	2.8424	1.83648	1.46774	0	2.9416	3.27908	2.84732	3.79618	1.74734	1.9135	0.985236	1.80289	1.90711	2.69913	1.89677	2.17122	2.32943
ADCY3	4.29562	4.43121	3.79253	5.46806	4.16696	4.79341	3.87608	5.19497	4.58009	4.87227	4.21145	4.72632	4.73993	5.14494	4.29865	5.67062	5.79865	5.97115
ADCY7	3.96759	3.8793	2.61888	3.91906	1.52846	3.7453	2.24237	2.4976	3.79618	4.75121	3.79843	3.67306	3.6572	3.40966	3.11964	3.04674	3.33779	1.88129
ADD1	6.81803	7.12443	6.89825	6.9613	5.40821	6.42568	7.17042	7.05178	6.88826	6.93553	6.73001	6.46251	6.27305	6.80362	6.31407	6.88415	7.06019	6.91217
ADD2	0	0	0	0	0	0	0	0	0	0	0	0	0	0	0	0	0	0
ADD3	8.21862	8.33683	8.09574	7.82676	7.68959	7.80987	7.84473	7.82767	7.51507	8.09423	7.80878	7.90708	8.09793	8.34681	8.39762	7.81544	7.9235	7.85691
ADGRA2	0	0	2.28008	0	0	1.95009	0	2.84732	0	1.12347	1.50833	0	0.871627	1.2481	0	0.932009	2.5621	0
ADGRD1	0	0	0	0	0	0	0	0	0	0	0	0	0	0	0	0	0	0
ADGRE5	0	1.24585	1.19263	0	0	0.96692	1.16601	0	0	0	0	0	0.871627	0	1.67701	0	0	0
ADGRF3	0	1.61229	1.19263	1.46774	3.09409	1.54069	1.80233	2.03503	0	2.78523	1.50833	2.29823	2.36419	0.755007	2.10315	2.4698	2.5621	2.67086
ADGRG1	5.35543	6.06255	5.20942	5.86768	4.00704	5.86492	4.6226	5.47172	4.664	6.04064	5.97272	5.75222	4.49652	4.76183	4.85897	5.95027	6.66129	5.77296
ADH5	8.44492	8.60675	8.66073	8.34838	9.38417	8.58069	8.8455	8.55418	8.64104	8.23634	8.33914	8.33235	8.31268	8.62828	8.75401	8.35291	8.24341	7.97704
ADI1	8.04041	7.89238	7.68246	7.78116	8.38632	7.88171	8.05503	8.37729	8.10117	7.98437	7.68491	7.84081	8.33509	8.10882	8.17163	7.70678	7.51736	7.63137
ADIPOR1	7.31676	6.95136	6.81832	7.24776	7.24587	7.28221	6.95591	7.28462	7.44564	7.10569	7.23294	7.30142	7.16705	7.51205	7.28986	7.14699	7.37235	7.16917
ADIPOR2	5.89672	6.44972	5.97069	6.26553	5.58855	5.86492	5.59301	6.14388	6.09434	5.93342	6.42393	6.27448	6.1935	6.72139	6.28387	6.6169	6.74851	6.72352
ADK	8.28785	8.37607	8.26207	8.20034	8.77568	8.60919	8.3194	8.6794	8.45334	8.33969	8.21028	8.36701	8.5831	8.45819	8.60115	7.88358	8.11436	8.12307
ADM5	2.66114	1.24585	2.89306	2.65481	0	0.96692	1.16601	2.84732	0	2.78523	1.9135	0	1.80289	2.97754	0.631718	2.4698	1.6334	2.67086
ADNP	7.10985	7.2853	7.3487	7.33713	5.0462	7.08329	6.39818	7.03484	6.74148	7.32305	7.2679	7.08948	7.16705	7.03303	6.96136	7.50524	7.4085	7.64594
ADNP2	5.09943	5.42066	5.30636	4.82635	5.47086	4.84224	4.82609	4.59916	5.45856	5.40103	4.4123	4.72632	5.80121	6.32335	5.81993	6.11051	6.38708	6.42992
ADNP-AS1	1.22115	2.14697	0	2.8441	0	2.5294	3.99339	2.4976	2.40527	2.18145	0.942911	1.9778	1.41113	2.35779	0.631718	1.49358	1.26401	0
ADO	5.9286	4.82943	4.99352	5.46806	5.40821	4.39561	5.30601	4.77271	5.7549	5.72418	5.47096	5.82882	4.73993	5.14494	5.62492	5.84025	5.7241	5.60412
ADORA1	3.36727	3.40614	1.19263	3.53547	3.82716	3.11058	3.60824	4.17318	3.93776	4.02884	4.28155	2.97406	3.45374	2.84574	2.69913	3.86977	3.52509	3.06714
ADORA2A	2.66114	2.97415	4.03811	3.83229	4.16696	3.63876	3.27908	3.56609	3.46298	3.53708	4.13777	3.43247	3.55906	3.09829	2.5716	3.67842	3.23415	0.740719
ADPGK	6.51618	6.87756	6.44528	6.23203	6.32483	6.18189	6.11718	6.23571	6.41809	6.34254	6.1139	6.25611	6.16041	6.3109	6.62636	6.37006	6.53615	6.18583
ADPRH	4.39025	4.06809	4.2479	4.28849	3.62161	4.18459	4.20279	3.12858	3.79618	4.47356	3.79843	4.72632	3.74909	4.60761	3.82638	4.03868	4.21103	4.2568
ADPRHL1	2.66114	1.24585	3.65205	4.07835	4.87144	2.9416	2.57909	2.03503	3.46298	3.20959	2.70806	3.14357	3.08194	2.5394	2.81629	2.87883	3.8395	3.3777
ADPRHL2	6.02023	5.51022	5.91029	6.61653	5.69736	6.3262	6.63327	6.87266	6.06377	6.774	6.18878	6.46251	6.6036	6.33568	5.97918	6.5625	6.58962	7.09322
ADPRM	5.53185	5.44358	4.5935	4.78074	5.93812	5.32701	5.43606	5.47172	4.664	4.22346	4.21145	3.77981	4.38636	4.68678	4.17246	3.67842	4.15538	3.91563
ADRB2	2.32019	1.24585	0	3.2971	2.25386	3.7453	1.16601	0	1.28241	1.74734	0.942911	2.78195	2.36419	2.14998	0	0.932009	1.6334	3.6331
ADRM1	7.32876	7.53511	7.37128	7.65412	7.22784	7.55546	7.97882	8.27277	7.81032	7.63678	7.8147	7.59252	7.96051	7.71925	7.62307	7.75001	7.70833	7.70745
ADSL	8.82967	8.93251	8.9579	8.41334	9.47102	8.5182	9.11191	9.27406	9.02111	8.21932	8.25016	8.39667	8.36081	8.3977	8.66308	7.84991	7.99262	7.76644
ADSS	7.25523	7.00627	6.95914	7.24776	7.01308	7.23728	6.98453	6.68991	6.68234	7.20123	7.17886	7.29243	6.93239	7.1494	7.4019	7.49801	7.06775	6.98275
AEBP1	7.74155	7.55629	7.55017	7.21384	4.00704	7.0731	7.50277	7.45987	7.51507	7.29083	7.07412	7.2279	7.12479	6.84735	6.45626	6.70742	7.37844	7.05004
AEBP2	5.20734	5.63492	5.20942	5.3481	4.56178	5.60683	4.54784	5.47172	5.3102	5.96098	5.52975	5.77821	5.13006	5.67801	5.52518	6.01246	5.90372	6.03159
AEN	6.71209	5.93898	5.99997	6.68002	6.35836	5.76716	6.44012	6.14388	6.53413	6.06624	6.17043	5.90155	7.30212	6.70246	6.71202	6.89519	6.95818	6.53805
AES	9.65067	9.79063	9.60994	9.58548	8.87747	9.61439	9.30301	9.5373	9.41541	9.59221	9.53108	9.58323	9.24089	9.29175	9.17737	9.46632	9.45061	9.38367
AFAP1	0	0	0	0	0	0	0	0	0	0	0	0	0	0	0	0.932009	0	0
AFAP1L2	1.87289	2.35466	3.65205	3.01141	0	1.95009	3.45303	2.03503	3.02896	3.01296	3.06682	1.9778	2.76725	2.5394	1.67701	3.33332	1.26401	3.06714
AFDN	6.07823	6.41536	6.1898	6.14471	4.44179	6.10394	6.33289	6.26507	6.06377	6.0914	6.46969	6.34572	5.61836	6.09569	5.70307	6.01246	6.57908	6.39584
AFF1	7.06752	6.67944	6.86681	6.9613	4.96146	7.01039	5.30601	6.32205	6.41809	7.30165	6.46969	6.59998	6.5535	6.54139	6.56908	6.88415	6.90855	7.12824
AFF2	5.20734	4.7581	5.30636	4.07835	5.0462	4.57966	4.20279	4.29203	4.29438	5.13677	5.27867	5.01562	4.78404	4.56634	4.68501	4.81956	5.05473	4.53252
AFF3	8.15265	8.19885	8.04046	8.19165	6.42316	8.07796	7.7727	7.69375	7.45745	8.53112	8.33503	8.46626	8.08476	7.83239	7.92327	8.19203	8.28614	8.36248
AFF4	5.83076	5.16894	5.7472	5.1826	4.16696	6.04258	5.1121	4.92761	5.20207	5.98802	6.29429	6.16055	6.03823	6.16645	6.21084	5.64467	6.28705	6.3491
AFG3L1P	4.47905	4.23501	3.4964	3.01141	0	3.52372	3.27908	4.04365	4.06668	3.80381	3.89103	3.87921	4.44249	4.56634	4.08175	4.99411	5.4279	4.79911
AFG3L2	6.31376	6.62033	6.80179	6.99164	6.2193	6.27376	6.24097	6.7114	6.81674	6.71047	6.65277	6.88943	6.27305	6.3109	6.54382	6.74454	7.06019	6.85478
AFMID	3.96759	2.6974	3.92054	2.65481	3.09409	3.11058	4.20279	4.04365	3.63918	3.6766	3.06682	3.14357	4.06736	4.23868	3.20807	3.86977	3.43448	2.81539
AFTPH	6.99408	6.91903	7.31415	6.69239	6.14439	6.67517	6.95591	7.19594	7.28266	6.86434	6.63948	6.84094	6.8309	6.91468	6.80711	7.02155	7.13403	7.11433
AGA	5.95979	5.46613	6.21498	4.99562	6.39112	5.8411	5.80043	5.42045	6.12427	5.23034	5.40967	5.67134	6.43399	6.16645	6.21084	5.99203	5.68533	5.9241
AGAP11	2.66114	1.61229	1.83648	2.18007	0	1.95009	1.80233	2.84732	1.95043	2.18145	1.9135	1.56524	2.36419	1.90711	2.92465	1.89677	2.86934	1.88129
AGAP12P	2.93671	2.6974	2.28008	2.18007	1.52846	1.54069	2.24237	1.35002	1.28241	2.5147	2.89856	2.29823	3.34013	3.31315	3.29139	3.04674	2.86934	3.17825
AGAP2	3.83928	2.53619	3.4964	3.2971	2.25386	3.11058	4.54784	4.04365	3.26223	3.80381	3.89103	4.05954	3.99413	4.07174	3.44485	3.45776	3.90845	3.46795
AGAP3	4.5627	3.81045	3.4964	3.91906	3.38183	4.39561	3.45303	4.04365	4.58009	3.6766	4.13777	4.21982	3.6572	4.23868	3.20807	3.9567	4.55004	3.85002
AGAP4	2.32019	3.09486	2.89306	2.43688	0	2.5294	3.45303	3.74343	3.26223	3.20959	3.69947	1.56524	1.41113	3.58523	3.11964	3.04674	2.72388	3.28142
AGAP5	2.66114	3.73815	2.28008	2.8441	1.52846	3.26183	3.08125	3.12858	4.18502	2.78523	1.9135	1.56524	3.45374	2.5394	3.64819	3.04674	3.12249	2.67086
AGAP6	4.39025	4.43121	3.4964	3.83229	4.16696	3.93734	4.38561	3.36386	4.39604	4.22346	3.59321	4.05954	4.69442	2.97754	4.83139	2.68876	4.31628	3.55289
AGAP7P	2.93671	3.40614	3.3219	2.18007	0	1.54069	2.57909	3.36386	2.40527	2.78523	3.35389	1.9778	2.93316	3.81405	2.92465	3.33332	3.8395	2.12269
AGAP9	2.93671	2.53619	1.83648	0.912987	3.09409	2.26863	3.27908	3.12858	3.26223	3.20959	2.70806	2.78195	3.45374	3.40966	3.11964	2.21155	3.61034	1.88129
AGBL5	5.76163	5.69345	6.0568	5.99297	6.10543	5.91143	6.44012	5.82704	5.25715	5.5894	5.99375	5.80374	6.12654	4.90115	5.73319	4.90947	6.23431	6.33718
AGER	1.22115	2.35466	3.12336	1.86743	1.52846	1.95009	1.16601	0	2.75056	1.74734	1.50833	1.56524	2.76725	0	3.44485	0.932009	1.6334	2.81539
AGFG1	7.13739	6.89429	6.46641	7.2224	7.3825	6.59195	6.63327	7.05178	6.64153	7.06816	7.16038	6.81607	7.00874	7.0481	6.97402	7.00124	6.88308	6.83795
AGFG2	2.32019	1.24585	2.61888	0	1.52846	0.96692	0	1.35002	0	1.12347	1.50833	0	0.871627	2.5394	2.10315	0.932009	2.37986	2.67086
AGGF1	7.29246	7.43574	6.78507	6.64226	6.0242	6.91089	6.99863	7.00034	7.00549	7.41559	7.13219	7.04736	7.46681	6.96319	6.83514	6.8618	7.11956	7.34023
AGK	5.95979	5.93898	5.67643	5.82337	5.40821	5.95649	5.47693	5.19497	5.7549	5.75599	5.55827	5.52555	5.06002	5.55679	5.60877	5.35575	5.51891	5.58408
AGL	6.16109	6.18999	6.28801	5.70627	5.53091	5.88836	5.98175	5.78713	6.1536	6.11612	5.66703	5.293	5.90474	6.08111	5.86142	6.12934	5.8167	6.37266
AGMAT	1.87289	2.14697	3.3219	3.2971	2.25386	3.39871	3.45303	1.35002	3.46298	2.5147	2.48852	2.78195	3.08194	2.70069	2.69913	3.33332	2.72388	3.55289
AGO1	4.92073	4.7942	4.66835	5.11069	4.31091	4.63614	3.08125	4.50386	3.46298	4.87227	5.40967	5.25649	3.83548	4.34013	4.17246	5.22177	4.75114	4.79911
AGO2	3.54233	4.60389	5.0506	3.83229	3.62161	4.25841	3.74836	2.84732	4.39604	4.31173	3.79843	4.36406	3.34013	4.3883	4.58947	4.72367	4.50622	4.30657
AGO3	4.29562	3.66203	4.51454	4.73364	4.56178	3.63876	3.74836	3.12858	3.46298	4.22346	3.69947	3.77981	4.32795	4.96607	3.58354	4.39056	4.03719	3.6331
AGO4	4.19434	4.00786	4.2479	4.35224	5.20206	5.2567	3.60824	3.74343	3.93776	5.03672	4.69515	3.43247	4.20353	4.3883	4.45138	5.18623	5.30541	5.11063
AGPAT1	6.31376	6.26909	5.7472	6.65495	5.2741	5.74164	5.86344	6.79428	5.79267	5.84743	6.01448	5.97079	6.37752	6.2073	5.88844	5.59133	6.44625	6.36093
AGPAT2	3.54233	4.00786	4.34236	4.07835	4.00704	3.7453	4.54784	4.04365	4.58009	3.53708	4.28155	1.9778	3.74909	3.81405	3.20807	3.77726	3.90845	4.1518
AGPAT3	3.16799	3.58167	3.3219	3.16132	2.7343	2.75017	3.74836	3.12858	2.75056	2.5147	3.89103	2.97406	2.36419	3.20972	2.27675	3.9567	3.69084	3.06714
AGPAT4	3.16799	3.73815	2.89306	4.15185	1.52846	3.26183	2.85191	4.85223	3.63918	4.54814	4.58857	4.21982	2.57975	3.40966	4.65386	3.67842	3.43448	4.35468
AGPAT5	6.81803	6.91083	7.04593	7.50782	7.28126	7.27334	6.95591	6.98278	6.88826	6.81988	7.25053	7.50964	7.12479	6.78574	6.90295	7.13772	6.92528	6.98275
AGPS	6.28941	6.29452	6.60624	6.77613	6.06539	6.5776	6.16798	6.14388	6.12427	5.81759	6.34428	6.38006	6.5016	6.56253	6.52672	6.32175	6.32538	6.60918
AGTPBP1	6.69366	6.10629	6.26408	6.19773	6.48518	5.86492	6.06452	5.47172	5.93458	6.32144	6.03492	6.36299	6.27305	6.28569	6.15632	6.11051	6.23431	5.93995
AGTRAP	3.96759	4.7942	4.51454	4.82635	4.87144	5.02254	4.7614	4.77271	5.02298	5.13677	5.34566	4.49518	4.44249	3.66561	4.29865	3.9567	4.0975	4.57376
AHCTF1	6.18768	6.66001	6.78507	6.23203	4.67255	5.86492	6.1428	6.01157	6.36893	6.66091	6.82697	6.52523	7.16705	6.64415	6.90295	6.78073	6.90011	6.70508
AHCTF1P1	5.30774	5.46613	5.39719	5.14709	2.7343	5.18279	5.35068	4.85223	4.491	5.81759	5.47096	5.55591	5.86421	5.51402	5.60877	5.9713	5.83453	5.82512
AHCY	8.4668	8.72838	8.73661	8.39832	9.18834	8.34266	8.82981	8.84407	8.75544	7.77518	8.05881	8.16025	8.3789	8.44116	8.3571	8.01599	8.16808	7.98087
AHCYL1	7.28016	7.18688	7.16703	7.39882	7.19109	7.17192	7.14529	6.87266	7.38512	7.33363	7.4387	7.08948	7.33955	6.86448	6.85582	6.90616	7.09758	7.01305
AHCYL2	2.32019	2.35466	2.89306	3.4212	0	1.54069	0	3.12858	3.93776	2.5147	2.22947	3.55778	2.11066	2.35779	2.69913	0	1.92723	1.88129
AHDC1	5.89672	6.04768	5.35249	5.40933	3.82716	5.57829	5.1121	5.61541	5.82948	6.27827	6.17043	6.19954	5.90474	5.71625	4.93867	5.35575	5.88673	5.87546
AHI1	7.19096	7.08125	7.31415	7.32923	7.50731	7.49567	7.34614	7.16513	7.32194	7.53042	7.50614	7.29243	8.06701	7.98115	8.12413	7.99046	7.73705	7.75752
AHNAK	0	0.753427	0	0	0	0	0	0	0	0	0	0	0	0	0	0	0	0
AHSA1	7.13739	7.32903	6.80179	7.14351	6.68339	7.01039	7.56095	7.25566	7.32194	7.29083	7.10345	7.47033	7.07238	6.82127	6.45626	6.50597	6.8484	6.3491
AHSA2	5.95979	5.65469	6.0844	5.14709	4.77542	5.51945	5.73455	5.78713	6.09434	5.27494	5.86267	5.18058	6.42008	5.85982	5.65669	5.47835	5.49669	5.82512
AIDA	5.04229	6.09186	5.44054	5.68166	5.53091	5.74164	5.43606	5.42045	5.67626	5.81759	6.17043	5.55591	6.00133	6.36004	5.57591	5.86294	5.92051	5.68161
AIF1	5.89672	6.39199	6.21498	6.70465	7.28126	6.97798	5.83228	6.29384	6.2919	6.51979	6.07495	6.76501	6.39185	6.22067	6.35338	6.30528	6.63101	6.21218
AIFM1	6.18768	5.78601	5.67643	5.8457	5.53091	5.95649	6.09109	5.94056	6.23816	5.65836	5.88536	5.64333	6.12654	5.99039	5.74801	6.25471	6.57908	6.27603
AIFM2	3.83928	3.40614	3.4964	2.8441	0	3.11058	4.38561	4.17318	3.93776	1.12347	2.89856	3.43247	3.45374	2.14998	1.67701	3.45776	0.766223	2.94675
AIG1	6.83495	6.16263	6.31156	6.39226	7.47711	6.67517	6.73785	6.45537	6.46563	6.211	6.18878	6.65711	6.94216	6.64415	6.84207	6.05248	6.42287	6.15898
AIM1	6.47358	5.80383	5.87912	6.39226	4.77542	5.76716	5.47693	5.42045	5.86537	5.96098	6.17043	5.46284	5.61836	5.77178	6.11117	6.47686	6.23431	6.10375
AIM2	2.66114	2.35466	3.12336	2.8441	1.52846	2.75017	4.20279	4.50386	3.93776	1.74734	3.21748	3.14357	3.55906	3.40966	3.58354	1.49358	3.52509	3.70909
AIMP1	8.72915	8.6344	8.73226	8.49328	8.81243	8.53315	8.72768	8.9106	8.55574	8.57191	8.57026	8.83457	8.6017	8.34376	8.62544	8.35291	7.96051	8.38293
AIMP2	8.01835	7.87563	7.80364	7.76953	8.76946	7.80372	8.4483	7.92284	8.09363	7.63678	7.38398	7.60709	7.71487	7.85399	7.59874	7.66866	7.44378	7.40449
AIP	7.09587	7.18688	7.08743	7.00162	7.50731	7.1909	7.3896	7.56983	7.46916	6.78945	6.79137	7.02583	6.92256	6.75851	7.0236	6.33803	6.90855	6.50645
AJUBA	1.87289	1.90426	1.83648	1.86743	3.62161	3.93734	3.08125	2.4976	3.26223	3.01296	2.48852	1.9778	0.871627	2.14998	2.4317	2.68876	3.52509	2.12269
AK1	1.22115	1.24585	1.83648	0.912987	0	2.26863	2.24237	3.56609	1.28241	3.01296	0	0	0	1.90711	0	1.89677	0.766223	1.88129
AK2	8.89568	8.79226	8.69694	8.70649	9.15056	8.8461	9.17846	9.01797	9.2248	8.70418	8.72608	8.58511	8.38249	8.88064	8.81512	8.57868	8.43671	8.35363
AK3	7.45454	7.50274	7.65512	7.21384	8.40249	7.75991	7.52242	7.313	7.4923	7.30165	7.5494	7.33682	7.07238	7.07778	7.31497	7.13772	7.37235	7.1213
AK4	1.87289	2.97415	2.61888	3.01141	4.96146	4.57966	2.57909	2.03503	0	3.20959	4.47348	3.43247	1.80289	1.90711	1.67701	2.21155	3.00146	3.17825
AK6	7.95009	7.63803	7.90772	8.00096	8.44991	8.29959	8.07513	8.37055	7.99986	7.7517	8.12704	8.1303	8.19915	8.14782	8.34983	8.13259	8.26329	8.1196
AK9	4.19434	5.44358	5.48263	4.68495	4.44179	5.39405	5.16307	5.31211	4.18502	5.36021	5.50065	5.55591	4.82685	5.08775	5.13189	4.4517	4.78821	5.13838
AKAP1	6.10638	5.98657	6.16416	6.12659	4.56178	5.14437	5.76787	6.37686	5.3102	6.6096	5.58624	5.99315	5.66629	5.49214	5.30227	5.32341	6.00164	5.80794
AKAP10	4.29562	4.00786	4.51454	4.15185	3.38183	3.39871	3.60824	4.29203	3.26223	4.02884	4.34841	3.77981	2.76725	4.34013	4.12782	3.04674	3.90845	3.6331
AKAP11	4.98279	6.17637	5.99997	5.439	5.12624	5.51945	5.66552	4.92761	4.491	5.93342	6.13299	5.67134	5.66629	5.71625	5.80583	6.30528	5.86954	5.9865
AKAP12	10.0253	9.96211	9.94144	9.9343	7.7157	9.66106	9.73232	9.69392	9.51763	10.578	10.4713	10.2718	9.86796	9.44479	9.4475	10.2648	10.3227	10.3833
AKAP13	6.76603	7.2004	6.56766	6.57705	5.0462	6.20074	6.19272	6.01157	6.03254	7.10569	6.90677	6.79076	6.51476	6.46484	6.52672	6.11051	7.05259	7.01305
AKAP17A	5.72579	5.6742	5.60201	5.40933	3.09409	4.74286	5.86344	4.92761	5.25715	5.62429	5.37802	5.10046	5.66629	5.77178	5.68778	6.07208	6.39911	6.36093
AKAP2	7.00907	6.89429	6.76815	7.33713	4.44179	6.67517	6.21705	6.68991	6.55626	7.3854	7.25053	7.34554	7.11618	6.75851	6.67372	7.60953	7.0218	7.54589
AKAP5	3.54233	2.53619	2.28008	1.86743	3.38183	0.96692	2.85191	1.35002	1.28241	3.01296	3.06682	3.43247	4.44249	1.90711	3.11964	3.45776	3.43448	3.46795
AKAP7	5.68903	5.78601	5.91029	5.439	5.74884	5.79223	4.88801	5.56908	5.7549	4.81301	5.05676	5.69881	5.92458	5.63872	5.36131	5.76998	5.40422	5.64338
AKAP8	6.65606	6.58984	6.62516	6.69239	5.34271	6.3262	6.09109	6.62346	6.48883	6.75838	6.42393	6.68485	6.88254	6.39582	6.4104	6.38581	6.70071	6.896
AKAP8L	5.15439	4.52013	4.93408	5.3481	2.7343	5.14437	5.43606	4.17318	4.95798	5.81759	5.34566	5.46284	5.29158	5.19996	5.10911	4.95241	4.85959	5.05348
AKAP9	8.67379	8.53655	8.63297	8.26802	6.32483	7.72128	8.46871	8.42359	8.19583	9.43895	8.92809	8.85608	8.80272	8.32841	8.79027	8.89711	9.00167	9.04735
AKIP1	5.83076	5.57392	5.84725	5.77767	5.69736	5.63482	5.83228	6.17514	5.86537	5.78712	5.50065	5.82882	6.10931	6.09569	5.77721	5.99203	5.79865	5.85887
AKIRIN1	6.71209	6.83486	7.08743	6.8879	6.54465	6.48838	6.77109	6.32205	6.81674	6.89324	6.83864	6.46251	6.91266	7.0024	6.85582	6.80436	6.89162	6.64831
AKIRIN2	6.04952	6.14875	6.11148	6.03242	5.34271	6.21934	6.11718	5.74607	6.46563	6.18786	6.1139	6.57054	6.28844	6.29835	6.14517	5.99203	6.24768	6.27603
AKNA	5.09943	5.6742	5.1584	5.55191	2.7343	4.32864	6.00987	5.31211	5.59308	5.40103	5.44064	5.36335	5.51744	4.86756	4.2578	5.95027	6.38708	5.52223
AKR1A1	8.56135	8.53388	8.4594	8.00096	8.96169	8.46463	8.85715	8.79963	8.77444	8.06912	8.40736	8.18959	7.88656	7.64685	7.91344	7.75001	7.81095	7.82737
AKR1B1	8.13226	8.05374	7.78694	8.53509	8.61158	8.34689	8.14653	8.02075	8.26465	7.79828	8.00285	8.00386	8.06254	8.11956	8.28524	7.94865	7.98864	8.05918
AKR7A2	7.6679	7.87563	7.90772	7.5008	7.79129	7.59874	7.49284	7.38162	7.38512	7.25788	7.10345	7.3542	7.41864	7.64189	7.50586	7.27091	7.42625	7.26039
AKT1	5.83076	6.06255	6.75104	6.28199	4.00704	6.44161	5.0044	6.29384	5.54962	6.32144	5.74354	5.90155	5.66629	6.26003	5.91495	6.18441	6.1371	5.82512
AKT1S1	3.16799	2.8424	3.65205	3.91906	3.62161	2.9416	3.08125	2.84732	3.26223	3.20959	2.70806	2.56027	3.08194	2.5394	2.69913	3.67842	2.72388	1.59121
AKT2	7.15097	7.4185	7.07373	7.13447	7.26367	7.21891	7.17042	7.05178	6.81674	7.32305	7.46906	6.85322	6.51476	6.69291	5.91495	6.43205	7.06019	6.74173
AKT3	7.10985	6.94335	7.04593	6.33028	6.32483	6.42568	6.11718	6.0458	6.46563	6.75838	6.54288	7.11008	6.89265	6.43074	6.85582	7.16536	6.71039	6.70508
AKTIP	2.32019	3.49658	3.79253	2.43688	1.52846	2.75017	3.74836	4.17318	3.46298	4.22346	2.48852	4.36406	3.83548	4.23868	2.81629	3.33332	3.90845	3.17825
ALAD	5.44634	5.51022	5.67643	6.26553	5.20206	5.63482	5.62972	5.47172	6.36893	5.65836	6.13299	6.31054	5.82252	5.89359	5.39936	5.74577	5.98578	5.93995
ALAS1	6.31376	6.53755	6.44528	6.40734	6.48518	6.5776	6.19272	6.7114	6.79829	6.30001	6.29429	6.75195	7.24013	7.15638	7.11792	6.95975	6.95002	6.95181
ALCAM	7.06752	6.71755	6.92902	6.70465	5.47086	6.94482	6.37674	6.48061	6.44206	6.86434	6.83864	6.76501	6.10931	5.9428	6.41969	6.93855	5.90372	6.67698
ALDH16A1	4.5627	4.56262	3.79253	5.68166	5.2741	4.9352	4.94738	4.99923	3.93776	4.9292	4.34841	4.61537	4.90883	5.40117	3.8812	5.1498	4.85959	4.83347
ALDH18A1	7.62962	7.92532	7.83647	8.17852	8.19545	8.03135	7.65298	7.7045	7.94221	7.58458	7.9872	7.73201	7.34693	7.42236	7.32489	7.73779	7.80192	7.8059
ALDH1B1	3.69843	3.40614	3.3219	3.73997	4.56178	3.63876	3.08125	3.90134	3.93776	3.01296	4.21145	2.29823	2.76725	3.81405	2.5716	2.87883	3.90845	2.67086
ALDH1L2	1.22115	2.14697	1.83648	1.46774	0	3.11058	0	0	2.75056	2.5147	0.942911	0	1.80289	2.14998	2.27675	0.932009	3.12249	2.12269
ALDH2	5.04229	3.73815	4.66835	4.35224	4.00704	4.10679	4.29709	4.17318	5.20207	4.02884	4.28155	4.82933	4.90883	4.34013	4.41469	4.51035	5.30541	4.40124
ALDH3A2	1.87289	2.6974	2.89306	3.91906	3.62161	3.26183	2.57909	4.04365	1.95043	3.38261	3.35389	2.29823	2.57975	1.2481	0.631718	3.86977	3.43448	1.88129
ALDH3B1	1.22115	3.09486	1.83648	2.18007	0	0	1.80233	3.12858	1.28241	2.18145	1.50833	1.56524	1.41113	0	0	2.4698	1.26401	2.32943
ALDH3B2	3.69843	3.58167	3.12336	4.15185	3.38183	2.75017	3.74836	4.17318	3.63918	4.22346	4.06012	3.43247	3.21681	4.43491	4.29865	2.68876	3.90845	4.09628
ALDH4A1	2.32019	2.14697	2.61888	3.16132	2.7343	2.75017	1.16601	2.4976	3.02896	3.01296	1.9135	1.9778	3.34013	1.2481	1.40503	2.21155	1.92723	2.67086
ALDH5A1	6.23944	6.75467	6.75104	6.37701	6.2193	6.56311	6.68651	6.50543	6.39372	6.5382	7.08397	6.9013	6.17705	6.12441	6.74934	6.57629	6.26092	6.72352
ALDH6A1	4.39025	4.72106	5.10551	4.4133	5.53091	4.69049	4.82609	4.85223	4.29438	4.81301	5.01622	4.43111	4.94814	4.90115	4.7155	4.62095	3.97426	4.35468
ALDH7A1	4.98279	4.7942	4.99352	5.28416	4.67255	4.69049	5.51667	5.19497	5.20207	4.9292	5.31255	4.67191	5.06002	5.49214	4.93867	5.38739	4.7131	5.21857
ALDH9A1	6.57779	6.58984	6.33472	6.21498	6.90378	6.5776	6.66898	6.947	6.51166	6.16434	6.05508	6.41361	6.75535	6.93914	7.01136	6.52031	6.38708	6.47415
ALDOA	9.56198	9.3574	9.35059	9.76016	9.87014	9.74532	9.53599	9.57881	9.59716	9.48239	9.76011	9.58323	9.2109	9.26781	9.07674	9.12533	9.35812	9.22448
ALDOC	0	1.24585	3.4964	3.83229	2.7343	3.52372	2.85191	0	2.40527	3.80381	3.59321	3.14357	1.80289	2.84574	2.5716	2.21155	3.23415	3.17825
ALG1	4.78798	4.86381	4.66835	5.1826	4.67255	5.68922	4.82609	5.06747	5.67626	4.81301	5.05676	3.87921	3.55906	5.02819	5.19816	4.86522	4.75114	5.08234
ALG10	4.64177	4.18148	3.4964	4.4133	5.0462	4.52088	4.54784	3.74343	4.29438	4.87227	4.28155	4.36406	4.13705	5.11663	4.77461	3.67842	3.76708	4.2568
ALG10B	5.04229	4.9937	4.66835	5.035	4.44179	4.74286	4.69366	4.17318	4.58009	4.22346	4.28155	4.43111	4.32795	4.83317	5.26152	5.38739	5.17155	5.52223
ALG11	5.79661	5.63492	5.25871	5.88933	5.0462	6.04258	4.94738	6.17514	5.59308	5.98802	5.79238	6.01517	5.54334	5.6585	5.96656	5.84025	5.62515	5.93995
ALG12	4.64177	4.1259	5.0506	4.4133	4.87144	4.39561	4.469	5.66029	4.39604	4.98396	4.47348	3.77981	4.44249	3.88292	4.33838	4.03868	4.46103	4.20525
ALG13	6.04952	6.00209	6.1898	6.45168	5.79854	6.06333	6.21705	6.7114	6.46563	5.90532	6.05508	5.925	6.77734	6.60392	6.74934	6.37006	6.09335	5.77296
ALG14	6.18768	5.87299	6.0568	6.50874	7.03398	6.1628	6.26451	6.774	5.93458	5.18432	5.88536	6.16055	6.1935	5.735	6.48309	6.14793	5.78037	5.77296
ALG1L	0	0	1.19263	0.912987	2.25386	0	0	0	1.28241	0	2.48852	0	0	0.755007	1.06958	0.932009	1.26401	0.740719
ALG1L2	1.22115	1.61229	1.83648	2.43688	2.7343	0.96692	2.57909	2.03503	2.40527	2.5147	1.50833	3.14357	2.76725	1.2481	3.02544	1.89677	1.26401	1.88129
ALG2	5.04229	4.33644	5.39719	5.28416	5.93812	5.29229	4.469	2.84732	3.79618	4.54814	4.69515	4.61537	4.78404	5.19996	4.91259	4.67322	4.78821	4.89982
ALG3	6.51618	6.62033	6.76815	6.42227	6.2193	6.8994	6.16798	6.774	6.98931	6.92157	6.69191	6.54049	6.5016	6.50908	6.29401	6.64334	6.65127	6.485
ALG5	8.57652	8.42295	8.82106	8.34447	9.52369	8.66454	9.06577	9.41167	9.10981	8.34493	8.50948	8.2833	8.77566	8.67029	8.79919	8.09476	8.11436	8.13345
ALG6	5.48973	5.57392	6.16416	6.12659	6.45451	6.40957	6.19272	6.52982	6.36893	5.44072	5.97272	5.72576	5.51744	5.9428	6.16739	6.37006	6.36272	5.84209
ALG8	5.86411	6.28186	6.0844	6.14471	5.93812	6.37679	5.76787	6.42967	6.39372	5.87667	5.58624	6.10003	6.16041	6.33568	6.31407	6.16629	6.00164	6.00169
ALG9	5.89672	5.37371	5.39719	5.93168	6.45451	5.71567	5.21231	4.40183	6.12427	5.65836	5.86267	5.61478	5.94416	5.67801	5.77721	6.05248	5.74311	5.79056
ALKBH1	3.69843	4.52013	4.93408	5.07334	4.56178	3.7453	4.82609	3.36386	4.58009	2.78523	4.21145	3.43247	5.32182	4.3883	5.19816	3.67842	3.76708	4.1518
ALKBH2	6.55755	6.8435	7.04593	6.65495	7.3158	7.08329	7.47277	7.27021	7.1139	6.211	6.54288	6.87746	6.8621	6.97112	6.80001	6.94919	6.60008	6.76861
ALKBH3	5.99033	5.53176	6.0844	5.63115	6.42316	5.68922	5.80043	5.82704	5.90039	6.06624	5.20843	5.99315	6.00133	6.23391	6.324	5.50743	5.60452	5.56376
ALKBH4	4.08542	4.68305	4.03811	4.4133	5.0462	4.52088	4.20279	5.47172	4.88991	3.80381	4.13777	3.67306	4.69442	4.76183	4.62203	4.32672	4.46103	4.65285
ALKBH5	6.38443	6.18999	6.21498	5.99297	5.64398	6.30893	5.66552	5.06747	5.54962	6.38386	6.05508	6.16055	5.43683	6.0515	5.79159	6.6169	6.56847	6.17247
ALKBH6	4.29562	4.72106	4.34236	4.0009	4.44179	4.18459	3.08125	4.04365	4.664	3.01296	4.4123	4.29375	4.69442	3.81405	3.76939	3.5723	4.59256	4.35468
ALKBH7	7.19096	7.08125	6.73371	7.02136	7.7027	7.1909	7.37886	7.49746	7.51507	7.16614	6.99287	6.85322	6.90269	6.83871	6.59391	6.40139	6.38708	6.32515
ALKBH8	4.19434	4.06809	4.34236	4.73364	1.52846	4.57966	3.45303	3.74343	3.93776	4.54814	4.4123	4.72632	4.59886	4.43491	4.96428	4.86522	4.50622	4.49008
ALMS1	5.04229	5.16894	4.5935	5.11069	4.44179	4.10679	4.54784	3.90134	4.58009	5.98802	4.9745	5.21904	5.19685	5.27874	5.21959	5.41835	5.51891	5.93995
ALMS1-IT1	0	1.61229	1.19263	2.18007	0	1.54069	1.16601	1.35002	2.75056	2.78523	0.942911	2.56027	1.41113	0.755007	0.631718	1.49358	2.17122	2.51022
ALOX12-AS1	3.83928	1.61229	2.61888	0.912987	4.67255	2.75017	1.16601	2.4976	1.95043	3.38261	2.89856	3.43247	2.76725	1.61491	2.4317	3.04674	3.23415	2.51022
ALOX5	8.26306	8.60675	9.10326	8.84589	8.6527	8.86984	8.35272	8.53624	8.54472	8.86235	8.73235	8.82525	8.14942	8.49165	8.12128	8.73441	8.52719	8.30549
ALOX5AP	7.03859	6.86063	6.50777	7.30527	7.82766	7.35132	7.73108	7.29888	7.18663	6.50114	6.42393	6.61448	7.52646	7.30179	7.53606	7.58926	7.06775	6.87965
ALPK1	4.92073	4.82943	5.71225	4.58234	4.00704	5.10489	4.6226	5.82704	5.14481	5.31821	4.93154	5.10046	5.56878	5.02819	5.08596	5.07406	5.64549	4.99396
ALS2	2.32019	2.6974	3.3219	3.53547	3.38183	4.25841	3.99339	5.19497	3.46298	4.02884	4.34841	3.97219	2.57975	2.70069	3.20807	4.81956	4.03719	4.1518
ALYREF	8.9157	8.81	8.59509	8.73068	8.51082	8.64059	8.12097	8.088	8.42956	8.27528	8.10788	8.3058	8.55154	8.55104	8.55974	8.6554	8.88889	8.57031
AMACR	4.85588	5.27495	4.93408	4.87057	5.84658	5.54917	5.394	4.92761	4.06668	4.81301	3.79843	5.05866	4.78404	5.30407	4.68501	5.18623	4.89401	5.13838
AMBP	3.96759	4.33644	3.65205	3.16132	4.96146	4.18459	4.7614	3.36386	3.46298	3.38261	3.79843	3.55778	3.55906	2.14998	2.81629	2.68876	2.72388	2.32943
AMBRA1	4.85588	4.60389	4.14681	4.35224	4.00704	4.52088	3.08125	4.29203	4.39604	4.39492	5.17198	3.67306	4.32795	4.86756	4.48716	5.38739	5.35566	4.99396
AMD1	9.6602	9.62634	9.28074	9.55532	10.4565	9.4839	9.2801	9.43769	9.24537	9.60973	9.66333	9.72357	9.3875	9.34611	9.57871	9.0849	9.17784	9.41804
AMDHD2	1.87289	3.40614	4.2479	3.01141	3.38183	2.75017	2.24237	3.74343	3.79618	3.01296	4.06012	3.14357	3.21681	2.70069	3.44485	3.45776	3.61034	3.06714
AMER1	4.19434	1.61229	2.28008	3.4212	2.7343	2.9416	0	3.56609	0	3.20959	2.70806	2.78195	2.76725	1.90711	3.58354	3.33332	2.37986	3.17825
AMFR	7.31676	7.26615	7.26676	7.62215	8.32829	7.91062	7.20732	6.7114	7.34754	7.8059	7.41551	7.3542	7.78167	7.38129	7.33964	7.92729	7.50628	7.76198
AMH	1.22115	4.28661	3.3219	2.65481	0	2.75017	2.24237	3.56609	3.26223	3.01296	2.70806	2.29823	3.55906	4.64774	3.11964	2.68876	3.52509	3.46795
AMIGO3	2.32019	2.35466	1.83648	2.18007	1.52846	2.26863	0	2.03503	2.75056	1.12347	2.22947	1.56524	1.41113	3.50011	2.69913	3.19714	2.37986	2.51022
AMMECR1	5.57278	5.22292	5.10551	5.40933	4.96146	5.54917	5.25992	5.66029	4.7433	5.98802	5.31255	4.77874	5.43683	5.61867	5.39936	5.1498	5.14322	5.29453
AMMECR1L	4.78798	4.60389	4.5935	4.63456	4.96146	5.14437	4.69366	5.31211	5.45856	5.44072	4.69515	5.39728	5.56878	4.64774	4.83139	5.67062	4.31628	5.47948
AMN	2.32019	3.49658	2.61888	2.65481	0	2.75017	3.45303	2.4976	3.26223	3.20959	3.35389	3.87921	3.74909	3.20972	2.69913	4.03868	2.17122	2.51022
AMN1	4.71673	4.7581	1.19263	3.64134	4.31091	3.93734	3.74836	1.35002	4.58009	3.01296	3.69947	3.55778	1.80289	3.40966	4.68501	2.68876	3.97426	2.94675
AMOTL2	6.04952	6.10629	6.16416	6.07083	7.55147	6.42568	6.31045	6.48061	6.26528	5.93342	6.20691	6.03686	5.80121	6.0515	6.13392	5.72116	5.47412	5.34304
AMPD2	6.07823	6.58984	6.66226	6.37701	5.53091	6.36012	6.24097	6.42967	6.12427	6.32144	6.4546	5.925	6.16041	6.27292	5.87499	5.72116	6.16555	5.29453
AMPD3	4.29562	4.00786	4.14681	4.47187	4.77542	4.02455	4.38561	4.29203	4.58009	4.39492	4.4123	4.61537	3.6572	4.3883	4.37703	3.9567	4.31628	4.30657
AMY2B	3.16799	2.8424	2.61888	2.18007	2.25386	2.26863	1.80233	1.35002	1.95043	1.74734	0.942911	0.985236	3.08194	4.12956	2.4317	2.21155	2.17122	2.94675
AMZ2	7.61009	7.40688	7.39351	7.15249	7.60831	7.35132	7.58918	7.39496	7.53749	6.93553	7.05424	7.34554	7.25588	7.1424	7.21181	6.97024	7.014	6.82946
AMZ2P1	6.10638	6.12058	5.87912	5.07334	5.98181	5.8411	6.03745	6.5774	6.1536	5.31821	5.34566	6.01517	5.71268	5.9428	5.79159	5.29032	5.45119	5.79056
ANAPC1	5.9286	5.51022	5.1584	5.68166	4.00704	5.10489	4.88801	4.92761	4.7433	5.23034	5.37802	5.293	5.35145	5.30407	4.48716	5.25645	5.45119	5.66262
ANAPC10	6.55755	6.57953	6.37997	7.23936	7.74134	6.87614	6.99863	7.2111	7.53749	6.36335	6.65277	7.12028	7.02721	7.39904	7.25396	6.92783	6.62077	6.92815
ANAPC11	9.89819	9.84435	9.99513	10.019	10.9582	10.1905	10.4858	10.5498	10.4809	9.86445	10.0697	9.90699	9.7211	9.80008	9.69993	9.44393	9.604	9.48846
ANAPC13	6.88456	6.81742	6.88261	7.36057	8.27661	7.22812	7.47277	6.85346	7.21473	7.27993	7.46906	7.15044	7.07238	7.21096	7.00521	6.7199	6.90011	7.12824
ANAPC15	8.01835	8.06856	8.24382	8.13387	8.93416	8.38859	8.33616	8.32946	8.29786	7.97088	8.34324	8.08417	7.87131	7.71925	7.65488	7.79199	7.62371	7.42153
ANAPC16	7.51878	7.64793	7.79531	7.72808	8.36174	7.80372	8.17785	8.21377	7.99986	7.57569	7.15104	7.44622	7.8815	7.7837	7.89691	7.71304	7.4782	7.29162
ANAPC4	5.44634	5.65469	6.46641	6.23203	5.47086	5.51945	5.80043	5.86588	5.02298	5.23034	5.31255	5.46284	5.92458	5.30407	5.68778	5.72116	5.92051	5.08234
ANAPC5	8.28785	8.17851	8.29196	7.93482	8.4105	7.96123	8.25036	8.05477	8.10868	8.17294	7.93378	8.02028	7.8403	8.09074	8.13545	7.97492	7.67409	7.7753
ANAPC7	7.29246	7.50818	7.45823	6.76446	7.50731	7.0525	7.2784	7.24096	7.26933	6.80474	6.76714	6.84094	7.18361	7.19751	7.15732	7.10003	7.06775	6.90411
ANG	1.22115	0	1.83648	0	2.25386	0.96692	1.16601	0	0	0	2.22947	0.985236	0	0	0	0	0	0
ANGEL1	2.32019	3.66203	3.4964	2.65481	3.09409	3.84451	3.60824	4.40183	4.18502	2.18145	3.97805	3.67306	2.76725	3.20972	2.92465	2.4698	3.97426	3.85002
ANGEL2	5.53185	5.19618	4.80733	5.11069	5.98181	5.2567	5.43606	5.25473	4.95798	4.81301	5.9077	5.3286	5.38047	5.25295	6.04068	6.21999	5.9371	5.75515
ANGPT2	0	0	0	0	0	0	0	0	0	0	0	0	0.871627	0	0	0	0	0
ANGPTL4	1.22115	2.53619	3.12336	2.18007	0	1.54069	2.57909	2.84732	1.28241	1.74734	1.50833	2.56027	3.21681	2.14998	1.90575	1.89677	2.72388	2.32943
ANK1	2.32019	4.00786	3.3219	3.4212	3.09409	3.39871	2.85191	3.12858	2.75056	3.92071	3.35389	2.56027	2.36419	2.97754	2.92465	4.39056	4.03719	4.49008
ANK2	3.16799	2.35466	0	2.8441	2.25386	2.5294	1.16601	2.03503	1.28241	3.53708	3.21748	3.14357	2.76725	3.58523	3.29139	1.89677	3.12249	2.51022
ANK3	1.87289	1.61229	2.61888	2.18007	2.7343	2.5294	1.16601	2.03503	0	1.74734	2.89856	2.78195	3.83548	2.84574	2.27675	3.04674	1.92723	2.67086
ANKAR	2.32019	1.24585	3.3219	0	1.52846	2.75017	2.57909	3.74343	1.95043	3.53708	3.47851	1.56524	2.76725	2.5394	2.69913	2.21155	2.72388	1.59121
ANKDD1A	2.66114	3.66203	2.89306	3.16132	3.38183	3.52372	3.27908	0	1.28241	4.02884	2.70806	2.29823	3.34013	2.14998	1.67701	2.68876	3.33779	1.59121
ANKDD1B	0	0	0	2.18007	0	1.54069	1.80233	0	2.40527	2.78523	0	0.985236	2.11066	0	1.67701	1.49358	0	0
ANKEF1	2.66114	3.73815	2.28008	2.18007	3.38183	1.95009	2.24237	1.35002	1.28241	2.5147	2.48852	2.97406	2.36419	3.40966	3.58354	3.19714	2.86934	3.6331
ANKFY1	3.54233	4.47635	2.61888	3.16132	2.25386	3.84451	2.24237	3.74343	1.95043	4.12943	3.69947	3.97219	4.13705	4.12956	3.71006	3.86977	4.63387	4.44634
ANKH	4.64177	4.68305	5.25871	4.78074	4.96146	4.9352	4.10189	3.74343	4.7433	4.54814	5.24398	5.46284	4.49652	4.60761	4.55617	5.59133	5.22659	5.54314
ANKHD1	7.83704	7.83721	8.09574	7.44341	5.47086	7.54075	7.82112	7.5341	7.61333	7.91561	7.86123	7.4543	8.09793	7.69552	7.65094	7.95922	7.99658	7.79287
ANKHD1-EIF4EBP3	8.21215	8.32454	8.4594	8.27626	7.86312	8.25521	8.27375	8.37729	8.17453	8.49387	8.39555	8.36273	8.34617	8.05388	8.02415	7.97492	8.315	8.08793
ANKIB1	5.57278	5.98657	5.52353	5.439	5.58855	5.29229	5.43606	5.70382	6.12427	5.36021	5.86267	5.14108	5.68967	5.25295	5.88844	5.25645	4.99257	5.11063
ANKLE1	3.16799	2.6974	3.4964	3.01141	1.52846	2.75017	4.10189	4.40183	3.46298	3.38261	3.06682	4.14191	2.76725	3.74174	2.4317	3.04674	3.00146	3.06714
ANKLE2	6.91671	6.73623	7.20524	6.45168	5.34271	6.63416	6.73785	6.92877	6.57805	6.6096	6.58507	6.18018	6.9615	6.78574	6.72706	7.10003	6.78564	6.99798
ANKMY1	3.36727	3.8793	3.79253	2.18007	2.25386	3.26183	3.60824	4.04365	4.06668	3.53708	3.69947	3.67306	2.93316	2.5394	3.76939	3.45776	3.8395	3.06714
ANKMY2	5.65131	5.69345	6.0844	5.86768	5.64398	6.25585	5.92381	6.14388	5.36136	5.93342	5.86267	5.36335	5.38047	5.57772	5.68778	5.88527	5.54079	5.47948
ANKRA2	4.5627	4.56262	4.99352	4.52817	4.96146	4.39561	5.35068	4.04365	5.20207	4.12943	4.7944	4.92548	4.64743	4.76183	5.26152	4.51035	4.67403	4.03854
ANKRD10	8.07643	7.7012	7.82015	7.3528	7.56589	7.44123	7.73108	7.48504	7.82862	7.35456	7.1131	7.43809	7.92647	7.7003	7.91015	7.88912	7.72754	7.33424
ANKRD11	8.79116	8.79449	8.84546	8.40585	7.05458	8.13297	8.52825	8.69566	8.59368	9.29206	8.88933	8.73194	8.88857	8.80946	8.63345	9.08249	9.03482	9.25173
ANKRD12	7.87025	7.68686	7.32576	7.10702	5.69736	6.74103	7.51263	7.69375	7.754	8.23634	7.63892	7.87733	7.66855	7.59135	8.02415	7.86685	8.04715	8.03724
ANKRD13A	6.59776	6.60008	5.60201	6.24888	6.10543	6.02153	5.80043	5.52122	6.48883	6.6096	5.95137	6.55559	6.47494	6.64415	6.41969	6.70742	6.64118	6.79501
ANKRD13B	3.83928	3.94501	3.79253	4.22178	3.09409	2.5294	2.85191	2.84732	3.63918	4.02884	4.13777	2.97406	4.49652	2.84574	3.82638	3.77726	4.03719	3.46795
ANKRD13C	4.85588	3.8793	4.99352	3.73997	3.82716	4.63614	3.74836	4.59916	4.491	4.98396	4.64284	5.55591	4.94814	4.99746	4.7155	4.39056	5.02399	4.99396
ANKRD13D	4.71673	4.47635	5.1584	4.58234	3.62161	3.52372	5.21231	4.77271	5.02298	4.54814	4.64284	4.36406	4.5486	5.19996	4.08175	4.99411	4.7131	4.69083
ANKRD16	5.09943	5.24917	5.35249	5.5245	4.87144	4.88947	5.25992	5.70382	5.45856	5.75599	5.0962	5.64333	5.40893	4.86756	5.17641	5.03464	5.22659	5.08234
ANKRD17	7.73255	7.44713	7.36003	7.02136	6.45451	7.09341	7.35713	7.08509	7.30897	7.85813	7.40769	7.4543	7.58374	7.35123	7.14617	7.59605	7.74178	7.65558
ANKRD18CP	1.22115	2.6974	1.19263	2.65481	1.52846	2.75017	2.24237	3.12858	3.02896	2.18145	0.942911	2.56027	0.871627	2.35779	1.90575	1.49358	2.17122	2.32943
ANKRD23	3.69843	3.81045	1.19263	2.8441	3.62161	2.75017	1.16601	2.84732	2.75056	3.53708	3.21748	2.56027	0.871627	1.2481	1.40503	3.04674	2.72388	2.94675
ANKRD26	5.65131	5.76797	6.54797	5.8457	2.7343	5.63482	5.62972	5.74607	6.00062	5.98802	6.54288	6.19954	6.6036	6.12441	6.33386	5.9713	6.64118	6.14537
ANKRD27	5.53185	5.51022	4.51454	5.035	4.44179	4.52088	5.1121	4.50386	5.08518	5.72418	5.61368	5.18058	5.92458	5.77178	5.54229	5.74577	5.95351	5.34304
ANKRD28	5.04229	4.9937	5.1584	4.73364	3.38183	4.88947	4.88801	4.50386	5.25715	5.72418	5.79238	5.36335	4.90883	5.25295	5.41802	5.88527	5.62515	5.56376
ANKRD30B	0	0	0	0.912987	0	0	0	0	0	0	0	0	0	1.2481	0	0	0	0
ANKRD30BL	5.68903	5.11286	4.51454	4.68495	4.96146	4.79341	5.43606	4.85223	5.08518	5.81759	5.74354	4.97126	5.19685	4.93398	4.91259	4.56671	5.25335	4.72783
ANKRD30BP2	3.36727	3.20625	4.43102	3.01141	4.67255	4.02455	4.7614	4.17318	4.664	4.81301	4.53217	3.97219	4.38636	3.40966	3.76939	2.87883	3.61034	4.69083
ANKRD33B	4.08542	4.96231	3.4964	4.68495	3.09409	4.63614	3.99339	4.17318	4.664	4.61906	4.13777	4.77874	4.94814	5.08775	4.83139	4.90947	5.54079	5.60412
ANKRD36	6.28941	6.09186	6.02867	6.57705	6.06539	6.30893	5.89394	5.13263	5.96798	6.81988	6.69191	6.64304	6.33367	5.77178	6.11117	6.5625	6.65127	6.71433
ANKRD36B	6.21379	6.06255	6.60624	6.7877	5.93812	6.48838	6.09109	6.0458	6.18234	6.93553	7.13219	6.5098	6.05633	5.82525	5.87499	6.50597	6.68113	6.77747
ANKRD36BP1	2.32019	0.753427	0	1.86743	1.52846	0.96692	1.80233	2.03503	1.28241	2.5147	0.942911	1.56524	1.41113	0	0.631718	1.49358	0	0.740719
ANKRD36BP2	7.25523	6.58984	7.05989	5.46806	7.13416	5.91143	6.68651	6.20575	6.12427	6.92157	6.70472	6.75195	6.97107	5.6585	6.79288	6.52031	5.85214	5.9241
ANKRD36C	6.65606	6.57953	7.12778	7.45797	6.39112	7.16234	6.57799	6.14388	6.44206	7.98437	7.72949	7.6709	7.12479	6.49814	7.01136	7.0711	7.3845	7.24133
ANKRD37	5.57278	5.34965	5.1584	5.77767	5.79854	4.63614	5.1121	4.29203	4.58009	4.75121	5.31255	5.05866	5.13006	4.64774	4.21576	4.32672	5.62515	4.40124
ANKRD39	5.89672	5.88977	5.71225	5.49656	6.42316	6.21934	6.03745	6.11192	5.20207	5.81759	5.34566	5.69881	5.49107	5.35343	5.01419	5.11243	5.05473	5.05348
ANKRD40	6.8009	6.72692	6.62516	6.89862	7.03398	6.98886	6.35498	6.20575	6.51166	6.80474	6.69191	7.01494	6.5535	6.552	6.40105	6.83909	6.83074	7.07179
ANKRD42	2.66114	3.40614	3.4964	3.01141	3.38183	1.54069	3.45303	2.03503	4.664	3.20959	3.47851	3.43247	3.08194	3.40966	4.17246	5.03464	3.76708	3.6331
ANKRD44	4.98279	4.9937	4.51454	5.11069	4.44179	5.02254	4.10189	4.50386	4.29438	5.18432	5.01622	5.36335	4.44249	5.51402	5.03851	5.22177	5.58359	5.38996
ANKRD44-IT1	1.22115	0	2.28008	0.912987	2.25386	2.9416	1.16601	2.03503	0	2.18145	1.50833	1.56524	0.871627	1.2481	0	0	2.72388	1.22775
ANKRD46	5.57278	4.7942	5.25871	4.58234	5.58855	4.18459	4.82609	4.99923	4.29438	4.9292	4.64284	4.92548	5.38047	4.68678	5.24071	4.90947	5.08483	4.83347
ANKRD49	7.10985	6.40372	7.07373	6.84423	7.46177	6.99966	7.10675	6.774	6.57805	6.50114	7.19711	6.43009	6.48833	7.03303	7.03573	6.7567	6.26092	6.47415
ANKRD50	4.47905	4.56262	3.3219	4.52817	3.38183	4.63614	3.99339	3.36386	3.46298	4.54814	4.21145	4.92548	4.20353	4.23868	4.12782	4.72367	4.92762	4.89982
ANKRD52	4.47905	4.00786	3.92054	4.68495	1.52846	2.9416	4.469	4.17318	4.18502	4.54814	3.69947	3.77981	2.76725	4.0115	3.76939	4.56671	5.11432	4.09628
ANKRD54	5.09943	4.96231	5.7472	4.87057	4.31091	5.2567	4.469	5.42045	5.3102	3.80381	4.84157	4.36406	5.43683	5.75351	5.65669	4.77241	5.68533	4.35468
ANKRD62P1-PARP4P3	3.16799	3.09486	4.14681	3.4212	3.38183	3.26183	3.87608	3.12858	3.93776	3.6766	3.47851	2.78195	3.08194	2.70069	2.92465	2.21155	3.43448	2.12269
ANKRD65	0	3.40614	2.61888	2.43688	2.7343	2.75017	3.60824	2.03503	1.95043	2.18145	3.59321	1.9778	3.08194	2.97754	3.20807	1.89677	3.00146	2.12269
ANKRD7	0	0.753427	3.12336	3.16132	2.25386	2.5294	1.16601	2.4976	3.46298	2.18145	2.70806	1.56524	3.08194	2.70069	1.06958	2.87883	1.92723	2.32943
ANKS1A	3.36727	3.09486	3.3219	3.91906	1.52846	2.75017	3.99339	3.56609	4.664	3.80381	4.47348	4.14191	3.6572	3.09829	2.81629	3.45776	3.76708	3.9784
ANKS3	3.36727	3.40614	4.51454	3.73997	1.52846	3.63876	1.80233	4.29203	3.26223	2.78523	2.70806	2.78195	3.34013	3.58523	4.21576	2.4698	3.61034	2.81539
ANKS6	2.93671	2.14697	3.4964	2.43688	1.52846	3.84451	3.27908	2.4976	3.02896	3.38261	1.9135	3.43247	2.76725	2.70069	2.69913	3.5723	3.23415	3.55289
ANKZF1	5.61258	4.60389	5.20942	3.4212	2.25386	3.52372	4.82609	4.29203	4.7433	5.27494	4.7944	4.55653	4.32795	4.56634	4.77461	4.67322	4.96046	4.49008
ANLN	5.53185	5.65469	5.84725	6.10824	4.96146	5.91143	5.70045	5.66029	5.02298	6.6269	5.40967	5.52555	6.14358	5.69726	6.4472	5.59133	5.8167	5.80794
ANO10	4.08542	3.20625	4.14681	4.73364	4.96146	4.52088	3.08125	4.50386	4.06668	4.22346	4.34841	4.36406	3.55906	4.18515	3.8812	3.45776	4.15538	4.72783
ANO6	6.31376	5.88977	5.7472	6.19773	5.74884	5.95649	5.70045	5.47172	5.86537	5.5894	6.27723	5.69881	6.09186	6.03646	6.0041	5.69611	6.07846	6.4522
ANP32A	9.35171	9.42661	9.30147	9.52625	8.32829	9.41294	9.01464	8.9382	8.67177	9.70856	9.70059	9.80007	9.19465	8.86157	9.15529	9.20739	9.15141	9.28315
ANP32A-IT1	0	0	0	1.86743	2.25386	0	0	0	0	1.12347	0	0	1.41113	0.755007	0.631718	1.89677	0	0.740719
ANP32AP1	6.85168	6.34408	6.58708	6.59033	5.12624	6.23771	6.46064	6.11192	6.18234	7.17793	7.24176	7.26513	6.75535	5.9747	6.5181	5.9713	5.79865	6.28847
ANP32B	10.2658	10.2002	10.1566	10.2666	9.33449	10.1242	10.0425	10.1719	9.98954	10.3637	10.441	10.3399	10.4417	10.1157	10.0405	10.3304	10.1783	10.3226
ANP32C	5.61258	4.93022	5.39719	5.49656	1.52846	4.32864	4.82609	4.04365	3.63918	4.9292	5.66703	5.293	4.94814	4.48006	5.34189	4.4517	4.50622	4.93189
ANP32D	4.98279	4.72106	5.1584	4.68495	2.7343	4.4596	3.45303	4.17318	4.29438	5.31821	5.13459	5.05866	5.02368	4.18515	5.13189	3.45776	3.76708	4.44634
ANP32E	9.57463	9.37091	9.35059	9.1516	8.30268	9.2596	9.21817	9.02656	8.76497	9.70245	9.49649	9.57398	9.62735	9.07527	9.41767	9.32847	9.16204	9.38512
ANTXR1	2.32019	1.90426	2.28008	3.53547	1.52846	3.84451	4.10189	3.74343	2.40527	4.12943	3.35389	2.56027	1.80289	3.20972	2.81629	3.5723	2.72388	2.94675
ANTXR2	2.93671	3.09486	3.92054	3.64134	4.56178	3.11058	1.80233	3.56609	1.95043	4.12943	3.21748	3.97219	3.45374	3.31315	1.40503	3.45776	4.55004	3.70909
ANTXRLP1	4.19434	3.40614	2.61888	4.15185	2.7343	3.93734	4.54784	4.29203	3.46298	4.02884	4.06012	4.05954	4.86842	4.34013	3.98496	4.03868	4.0975	3.70909
ANXA11	8.34804	7.92532	8.22535	8.44293	7.19109	8.40899	8.08177	7.95021	8.3808	7.93658	8.40344	8.07895	7.82455	7.90041	7.72024	8.09954	8.19593	8.04092
ANXA2	8.9157	9.0714	9.11669	8.80661	9.44004	8.92472	9.4124	9.24488	9.35673	8.49387	8.53482	8.83457	8.62615	8.59788	8.80274	8.61254	8.47983	8.27456
ANXA2P1	5.61258	5.6742	5.20942	5.439	5.79854	4.9352	5.59301	5.47172	5.45856	5.27494	5.01622	5.14108	4.82685	5.17271	5.28204	4.4517	5.11432	4.76391
ANXA2P2	2.32019	2.14697	3.65205	3.4212	4.00704	3.11058	2.85191	3.56609	3.46298	3.20959	3.69947	3.97219	2.93316	1.2481	3.29139	3.86977	0.766223	2.12269
ANXA2P3	7.75939	8.17509	8.01916	7.94519	8.48069	7.8221	8.64492	8.40393	8.62018	7.6453	7.73574	8.14035	7.76526	7.63192	7.95236	7.42367	7.51736	7.78411
ANXA2R	2.32019	3.73815	4.66835	4.95513	4.56178	5.60683	4.69366	5.31211	4.88991	4.02884	4.47348	4.92548	4.69442	4.48006	4.74536	4.18988	4.26462	3.70909
ANXA4	2.93671	4.00786	4.14681	4.07835	5.12624	3.7453	3.99339	3.12858	3.46298	3.20959	4.13777	4.29375	3.21681	3.66561	3.29139	4.11626	4.55004	2.94675
ANXA5	10.2485	10.2376	10.1615	10.1956	10.8236	10.2907	10.309	10.2962	10.2578	10.0949	10.2619	10.1786	10.2701	10.2007	10.3574	10.0763	10.0257	9.91173
ANXA6	4.78798	5.61487	5.99997	5.75426	3.82716	5.36092	5.51667	5.19497	4.95798	5.13677	5.66703	4.49518	4.78404	5.19996	5.03851	5.61825	5.35566	5.56376
ANXA7	7.35246	7.11732	7.12778	7.28091	8.16736	7.61288	7.45242	7.42128	7.17237	7.39553	7.09374	7.07906	7.31721	7.5496	7.7127	7.36925	7.34151	7.11433
AOX1	7.67732	7.40104	7.58922	7.15249	7.58017	7.59161	7.0126	7.19594	7.0373	7.53042	7.25053	7.61433	6.93239	6.90643	6.94215	7.29613	7.06775	7.02796
AOX3P-AOX2P	0	1.24585	0	0	3.09409	0.96692	2.24237	0	1.28241	0	2.70806	2.56027	1.41113	1.2481	1.06958	1.49358	0	0.740719
AP1AR	6.31376	6.38016	6.62516	6.43705	6.42316	6.56311	5.95307	5.94056	5.86537	7.00337	6.62607	6.84094	6.37752	6.40756	6.56071	6.64334	6.96629	6.46322
AP1B1	7.25523	7.18688	7.12778	7.60916	5.98181	7.14298	7.53215	7.60469	7.52633	7.02964	7.06421	7.4543	7.16705	7.33289	6.96136	7.23657	7.42036	7.60675
AP1G1	6.21379	6.13473	5.7472	6.34603	5.84658	6.00018	5.92381	5.9765	6.03254	6.38386	6.48463	6.16055	6.78821	5.99039	6.70444	6.57629	6.4578	6.60918
AP1G2	5.86411	5.90636	5.7472	5.49656	4.16696	5.32701	5.89394	5.9765	6.23816	5.87667	5.01622	5.25649	5.40893	5.61867	5.49034	4.99411	5.76186	5.54314
AP1M1	7.15097	7.14555	7.00319	7.2972	6.68339	7.21891	6.70383	7.22611	7.15797	7.34413	7.15104	7.27429	6.799	6.81247	6.65023	7.28777	7.2581	7.15566
AP1S1	3.36727	3.66203	3.65205	3.53547	5.12624	4.10679	4.10189	3.90134	3.46298	4.12943	3.69947	4.43111	4.20353	3.40966	3.98496	4.03868	3.8395	3.3777
AP1S2	7.10985	7.4185	7.05989	7.20524	7.76653	7.11345	7.09367	7.22611	7.25587	7.33363	6.80333	7.42992	7.18361	7.44531	7.39249	6.80436	7.2581	7.24771
AP1S3	2.32019	1.90426	2.28008	1.86743	0	0	2.57909	2.03503	2.40527	2.5147	1.50833	2.78195	2.36419	2.70069	2.4317	2.4698	3.33779	2.94675
AP2A1	1.22115	2.6974	2.61888	2.43688	1.52846	2.75017	2.85191	2.03503	1.95043	3.01296	3.06682	3.77981	3.08194	2.5394	2.4317	2.21155	3.00146	3.28142
AP2A2	4.78798	4.64401	5.10551	4.91347	4.31091	5.32701	4.54784	3.90134	4.7433	5.40103	4.88726	4.55653	3.91699	4.18515	5.08596	4.81956	5.25335	5.52223
AP2B1	6.40724	6.40372	6.46641	6.56364	6.18233	6.36012	6.44012	6.45537	6.7796	6.42402	6.67898	6.73878	6.16041	6.0515	5.77721	6.35413	6.44625	6.3008
AP2M1	7.77701	7.85013	7.93829	7.94519	8.02846	7.99941	7.92815	7.7674	7.97543	7.5487	7.86123	7.39676	7.36882	7.55488	7.26945	7.32092	7.61858	7.50384
AP2S1	7.00907	7.2004	7.12778	7.4287	8.42639	7.96123	7.76448	7.67199	7.28266	7.5487	7.50614	7.57039	6.97107	7.03303	7.06563	6.94919	7.21792	7.62157
AP3B1	8.04041	7.87563	8.22535	8.17412	7.20958	7.95014	7.78902	7.62748	7.754	8.33969	8.16926	8.50568	8.28224	7.91692	8.14388	8.28315	8.03949	8.18758
AP3D1	6.4297	6.95934	6.66226	6.57705	2.25386	6.25585	6.52051	6.45537	6.46563	5.96098	6.57115	6.44639	6.56619	6.29835	6.22151	6.63018	6.87449	6.46322
AP3M1	7.2426	7.4127	7.56983	7.66671	7.67636	7.46482	7.41085	7.06853	7.25587	7.35456	7.4387	7.30142	7.13334	7.31431	7.7352	7.81544	7.42625	7.44394
AP3M2	5.04229	4.9937	5.25871	5.1826	5.89308	4.79341	5.51667	5.19497	5.3102	5.13677	5.27867	4.21982	4.9864	5.27874	5.43644	5.18623	4.99257	4.53252
AP3S1	7.05313	6.79977	7.01757	7.00162	8.2047	7.58446	7.34614	7.62748	7.22857	6.67762	7.10345	7.21844	7.23219	6.96319	7.13494	6.99098	6.79477	6.82946
AP3S2	6.31376	6.18999	6.35752	6.1626	6.62949	5.81687	6.94138	5.86588	6.41809	5.72418	6.09456	6.27448	6.16041	5.99039	6.31407	6.14793	6.00164	6.14537
AP4B1	5.68903	5.61487	5.81467	5.77767	4.44179	5.51945	5.51667	4.85223	6.31804	4.54814	4.93154	4.82933	5.94416	6.19382	5.50786	5.47835	5.11432	5.02403
AP4E1	5.15439	5.57392	4.99352	5.035	5.84658	4.57966	4.469	4.50386	4.58009	5.08761	4.64284	4.43111	4.86842	5.25295	5.45463	4.90947	4.99257	5.36669
AP4M1	5.57278	5.32518	5.81467	5.25109	5.40821	5.14437	5.30601	5.42045	5.3102	4.98396	5.40967	5.49453	5.26069	5.05828	5.06243	4.90947	5.62515	4.53252
AP4S1	4.19434	4.56262	4.14681	4.52817	4.31091	4.32864	3.60824	4.04365	4.29438	4.47356	3.06682	3.29524	3.6572	4.23868	4.33838	3.45776	3.61034	4.03854
AP5B1	2.32019	3.40614	2.28008	4.0009	2.25386	2.5294	3.45303	4.04365	3.46298	4.22346	3.89103	4.87821	3.34013	3.09829	2.92465	3.33332	3.12249	3.3777
AP5M1	5.04229	5.51022	5.39719	6.21498	5.93812	5.42644	5.62972	4.85223	5.67626	5.62429	5.31255	5.61478	4.94814	4.96607	5.54229	5.11243	5.40422	5.13838
AP5S1	6.49504	6.01745	5.71225	6.34603	6.39112	6.36012	6.19272	6.26507	5.79267	6.18786	6.58507	5.87771	6.1935	5.87681	5.88844	6.11051	5.7241	5.89185
AP5Z1	4.92073	4.68305	5.10551	4.4133	5.34271	3.93734	5.05925	4.85223	4.58009	5.18432	4.7944	4.43111	4.82685	4.96607	4.52208	4.95241	5.17155	4.83347
APAF1	4.64177	5.16894	5.67643	4.91347	5.53091	5.14437	4.69366	4.29203	5.02298	5.65836	5.44064	5.49453	5.19685	5.35343	5.73319	5.74577	5.51891	6.00169
APBA3	3.83928	3.49658	3.65205	3.53547	4.00704	4.02455	3.87608	4.40183	4.664	2.5147	3.59321	2.56027	4.64743	3.58523	3.93401	4.18988	4.50622	3.85002
APBB1	3.69843	4.9937	3.4964	4.47187	3.38183	4.4596	4.29709	4.85223	3.46298	4.02884	4.93154	4.49518	4.90883	4.07174	4.58947	4.72367	5.33075	4.69083
APBB1IP	9.86562	9.9371	9.84591	9.69557	8.40249	9.46843	9.4692	9.51914	9.39714	10.1227	9.99732	9.84226	9.79438	9.2565	9.38248	9.64054	9.6538	9.79563
APBB2	7.08177	6.86912	6.60624	6.97148	6.9485	6.95596	6.57799	6.34972	6.70233	6.92157	6.88442	6.84094	6.85178	6.83871	7.02968	6.83909	6.82183	6.81234
APBB3	2.93671	3.40614	3.4964	0.912987	2.25386	3.63876	4.20279	1.35002	2.40527	1.12347	2.22947	2.56027	2.57975	2.84574	2.27675	1.49358	2.5621	2.51022
APC	6.65606	6.28186	6.69843	6.84423	4.56178	6.12383	6.33289	6.11192	4.95798	7.00337	6.62607	6.81607	6.77734	6.57299	6.55229	6.6169	6.73907	6.4522
APCDD1	3.36727	4.56262	4.03811	4.15185	5.0462	4.25841	4.54784	2.84732	3.46298	4.02884	3.59321	3.55778	4.20353	4.23868	3.64819	3.77726	3.12249	4.1518
APEH	6.81803	6.66976	6.89825	6.8331	6.57348	7.01039	6.72094	7.2111	7.32194	6.6269	6.95046	6.72548	6.59124	6.45356	6.27366	6.12934	6.19345	6.485
APEX1	9.76987	9.97593	9.76721	9.7631	10.3688	9.86239	9.84393	9.84494	10.0296	9.26191	9.46106	9.58691	9.32355	9.46599	9.5227	9.1985	9.2276	9.19009
APEX2	5.68903	6.13473	6.1898	6.14471	5.58855	5.86492	6.00987	6.14388	6.26528	5.87667	6.13299	5.87771	6.07421	5.91018	6.22151	6.40139	5.83453	6.55873
APH1A	7.06752	7.63803	6.83467	6.9816	7.41473	6.98886	7.11971	6.50543	7.29587	7.10569	7.18802	7.15044	7.2242	6.8898	6.92268	7.28777	7.23815	7.19583
APH1B	5.35543	5.85601	5.7472	5.73046	5.93812	6.10394	5.89394	5.19497	5.71611	5.62429	5.05676	5.72576	5.13006	5.46993	5.5592	5.41835	5.25335	5.41287
API5	7.72349	7.67723	7.79531	7.45797	8.07961	7.59161	7.7727	7.19594	7.46916	7.7517	7.50614	7.58518	7.27146	7.62189	7.59054	7.54085	7.65415	7.6888
APIP	7.41006	7.3042	7.16703	7.07903	8.26782	7.64764	7.47277	7.5341	7.66516	7.63678	7.34359	7.47033	7.46681	7.61178	7.64303	7.0711	7.17658	7.31004
APITD1-CORT	6.28941	5.71244	6.35752	6.1626	6.39112	5.79223	6.44012	6.11192	6.00062	5.72418	5.95137	5.87771	6.46142	6.36004	6.62636	5.32341	5.86954	6.06089
APLF	4.08542	4.33644	4.43102	4.15185	3.62161	3.26183	3.87608	4.40183	4.491	3.20959	3.47851	4.21982	4.5486	4.0115	4.93867	3.86977	3.52509	4.30657
APLP2	7.2426	7.27256	7.6366	7.48667	6.90378	7.16234	7.2784	7.10145	7.60274	7.59341	7.5207	7.61433	7.66266	7.4049	7.59874	7.5338	7.48386	7.76644
APMAP	6.61746	6.50524	6.50777	6.76446	6.85763	6.18189	7.18283	6.7114	6.36893	6.66091	6.61253	6.25611	6.27305	6.61408	6.38217	6.70742	6.41104	6.25083
APOA1	3.54233	3.30966	1.83648	3.53547	2.25386	1.95009	2.85191	4.50386	4.18502	3.53708	3.35389	3.14357	1.41113	2.84574	3.44485	3.67842	3.12249	3.46795
APOBEC3A	0	1.61229	2.28008	1.86743	3.09409	2.5294	1.80233	3.12858	1.95043	1.12347	1.9135	1.9778	2.93316	3.09829	2.4317	0	0.766223	1.22775
APOBEC3A_B	6.40724	6.75467	6.33472	6.42227	7.03398	6.50364	6.68651	6.48061	6.48883	5.84743	6.20691	5.82882	6.51476	6.79471	6.61023	6.47686	5.98578	6.10375
APOBEC3B	6.4297	6.77288	6.31156	6.39226	7.03398	6.48838	6.68651	6.48061	6.53413	5.84743	6.22482	5.87771	6.5407	6.78574	6.62636	6.47686	6.01734	6.11776
APOBEC3C	8.1185	7.96545	7.58922	8.00096	7.47711	7.89334	8.06846	8.05477	8.16736	7.87996	7.77272	7.71193	7.65674	7.5496	7.33474	7.19248	7.4782	7.44394
APOBEC3D	4.47905	4.64401	3.12336	3.4212	3.82716	2.9416	3.99339	4.50386	1.95043	4.12943	3.47851	3.14357	4.26708	3.40966	2.81629	3.67842	3.23415	3.6331
APOBEC3F	5.15439	4.82943	4.66835	4.91347	1.52846	4.69049	5.70045	4.99923	5.3102	4.31173	4.34841	4.87821	4.9864	4.34013	4.77461	4.11626	4.59256	4.89982
APOBEC3G	7.06752	6.94335	6.89825	6.52267	7.01308	6.14344	7.46263	6.965	7.20075	5.5894	6.65277	6.14066	6.88254	7.05557	7.0597	5.99203	6.38708	6.33718
APOBR	2.66114	0.753427	1.83648	0.912987	0	1.95009	0	0	0	2.18145	3.35389	1.9778	2.36419	0	2.27675	1.49358	1.26401	1.22775
APOC1	2.32019	0.753427	0	0	2.25386	1.54069	1.16601	0	0	0	0.942911	0	0	0.755007	1.06958	0	1.92723	2.51022
APOL1	2.93671	2.53619	1.83648	2.43688	1.52846	3.11058	2.24237	1.35002	1.28241	3.53708	2.22947	2.78195	3.45374	3.20972	2.5716	2.68876	1.92723	3.6331
APOL2	3.16799	2.97415	3.3219	3.64134	0	2.9416	4.29709	1.35002	3.02896	4.02884	3.35389	3.29524	4.20353	3.09829	3.82638	3.5723	2.72388	4.2568
APOL3	4.71673	4.23501	5.35249	4.58234	4.00704	4.4596	4.82609	5.13263	5.14481	4.39492	4.47348	5.14108	4.69442	4.43491	4.68501	4.90947	4.36616	4.30657
APOL6	5.04229	5.39738	4.73951	5.57881	2.7343	5.57829	4.94738	4.92761	5.7549	5.47935	5.24398	5.90155	5.80121	6.11012	6.39164	6.12934	6.03286	6.27603
APOLD1	5.15439	5.02443	5.30636	4.58234	6.06539	5.14437	4.29709	3.90134	4.95798	4.68665	5.71849	5.01562	5.09546	5.17271	5.50786	5.07406	5.30541	5.13838
APOM	4.08542	4.18148	4.2479	0.912987	3.62161	4.97953	3.45303	3.56609	4.39604	2.5147	3.59321	3.67306	3.45374	3.94864	3.82638	2.4698	4.21103	3.17825
APOO	6.55755	6.72692	6.69843	6.8879	7.05458	7.20963	7.11971	7.13364	7.30897	6.80474	6.66593	6.92476	6.95186	6.78574	6.93569	6.88415	6.55778	6.62888
APOOL	5.68903	5.93898	5.7472	5.439	5.2741	5.88836	6.48087	6.29384	5.25715	6.23377	5.83962	5.925	6.10931	5.91018	5.95383	6.23745	5.90372	6.22518
APOOP5	1.22115	1.24585	0	1.46774	1.52846	0	0	1.35002	1.95043	1.12347	1.9135	0	2.76725	1.2481	2.27675	1.49358	1.26401	1.22775
APOPT1	5.79661	5.85601	6.37997	5.55191	6.51522	6.06333	6.68651	6.20575	6.09434	5.72418	5.88536	6.14066	6.09186	5.71625	6.26338	5.29032	5.83453	5.34304
APP	1.22115	0	0	2.65481	0	0	0	0	0	0	0.942911	0.985236	1.41113	0.755007	0.631718	0.932009	0	0
APPBP2	5.9286	6.2432	6.76815	6.01283	6.10543	5.95649	5.62972	5.74607	4.81846	6.06624	5.79238	5.52555	6.03823	6.70246	6.46526	6.4168	6.17957	5.82512
APPL1	7.44354	7.35947	7.32576	7.54239	7.89774	7.52588	7.0126	6.40351	6.48883	7.46455	7.46906	7.54791	7.2242	6.93103	7.22776	7.36131	7.08274	7.32823
APPL2	3.83928	4.68305	4.43102	3.91906	4.87144	3.7453	3.99339	4.40183	4.29438	4.22346	4.4123	4.21982	4.73993	3.88292	4.29865	3.77726	4.26462	3.78127
APRT	9.75661	9.65485	9.80295	9.82057	10.3932	10.0113	10.0678	10.1346	10.1215	9.63133	9.88921	9.75662	9.50253	9.31686	9.17325	9.18506	9.20722	9.06734
APTR	4.98279	4.8974	5.0506	4.28849	5.74884	5.0643	5.62972	5.19497	5.82948	4.47356	5.17198	4.82933	5.22912	5.67801	5.64089	5.03464	5.33075	5.08234
APTX	5.95979	5.14117	5.71225	5.9524	6.57348	5.57829	6.26451	5.90371	4.88991	5.84743	5.74354	5.80374	5.96347	6.1802	5.90175	5.67062	6.38708	5.95563
AQR	6.78357	7.15252	6.95914	6.87711	7.22784	6.88781	6.70383	6.55381	6.39372	7.05544	6.61253	6.97055	6.51476	6.89814	7.08327	7.10003	7.37235	7.14201
ARAF	6.16109	6.68906	6.16416	6.42227	4.44179	6.18189	6.1428	5.61541	6.31804	6.06624	5.95137	6.10003	6.10931	5.82525	5.64089	6.14793	6.36272	6.36093
ARAP1	4.5627	4.56262	4.80733	3.91906	4.31091	2.9416	3.60824	4.92761	4.58009	2.78523	3.97805	3.77981	3.34013	3.66561	3.51586	4.86522	4.36616	4.09628
ARAP2	2.32019	4.43121	4.2479	3.91906	3.09409	4.69049	2.57909	2.4976	3.26223	4.9292	3.79843	4.49518	4.78404	4.48006	4.37703	4.90947	4.55004	4.72783
ARCN1	7.05313	7.56676	7.62724	7.54239	7.05458	7.1332	7.0126	6.92877	6.9056	7.10569	7.23294	7.33682	7.25588	7.71454	7.8042	7.2624	7.31636	7.83163
AREG	1.22115	1.24585	1.83648	1.46774	0	3.52372	2.85191	0	1.95043	2.18145	0	2.78195	2.76725	3.94864	3.37016	1.49358	1.92723	1.22775
AREL1	4.08542	4.7581	4.73951	3.16132	3.82716	4.52088	4.6226	4.17318	4.491	4.61906	4.84157	4.29375	4.73993	4.48006	3.98496	5.1498	4.36616	4.65285
ARF1	9.35758	9.47885	9.33345	9.45725	9.72668	9.56068	9.23017	9.35819	9.38483	9.30018	9.36947	9.25346	9.13841	9.11159	8.96697	9.07279	9.39463	9.12916
ARF3	7.17775	7.13151	7.12778	7.16142	7.20958	6.88781	7.14529	7.19594	6.74148	7.47415	7.1131	7.31923	6.62801	6.72139	6.764	6.92783	7.08274	6.75075
ARF4	7.30466	7.103	7.33727	7.47955	8.34511	7.68158	8.007	7.45987	7.60274	7.25788	7.3188	7.37138	7.41163	7.32053	7.56983	7.51243	7.35392	7.27921
ARF4-AS1	4.08542	4.9937	5.5633	3.91906	4.44179	4.52088	4.6226	4.59916	5.14481	4.61906	3.69947	3.97219	3.45374	4.79795	4.7155	3.04674	3.43448	3.17825
ARF5	6.78357	6.8435	6.83467	6.71681	7.41473	6.80401	7.0537	6.834	7.06843	6.71047	6.57115	6.94784	6.39185	6.59368	6.87621	6.35413	6.43461	6.56896
ARF6	6.81803	6.33185	6.35752	6.9613	6.60176	6.66163	6.31045	6.07924	5.93458	6.64401	6.71742	6.52523	6.51476	6.83001	6.71956	6.65639	7.16254	6.94396
ARFGAP1	4.39025	5.08398	4.93408	5.21725	5.0462	4.4596	5.0044	4.04365	4.88991	4.54814	4.28155	4.55653	4.69442	4.18515	4.93867	5.1498	5.11432	5.19233
ARFGAP2	6.69366	7.02917	6.86681	6.7877	6.83399	6.54847	6.31045	6.7114	6.59952	6.48224	6.61253	6.47844	6.31875	6.6736	6.56071	6.63018	6.63101	6.77747
ARFGAP3	4.71673	5.22292	5.60201	5.63115	5.2741	5.51945	6.28766	5.3673	5.41078	5.27494	5.74354	5.18058	5.51744	5.61867	5.39936	5.59133	5.98578	5.68161
ARFGEF1	5.09943	5.22292	5.10551	5.31649	3.62161	5.22022	5.1121	5.70382	5.02298	5.55364	4.93154	5.52555	5.84352	5.08775	5.64089	5.9713	5.76186	5.47948
ARFGEF2	5.79661	5.05451	4.2479	4.95513	4.00704	4.97953	4.54784	4.59916	4.88991	4.87227	4.9745	5.10046	4.94814	4.76183	5.24071	5.22177	4.50622	5.24434
ARFIP1	5.68903	5.57392	5.7472	5.65663	6.45451	5.54917	6.06452	5.3673	5.02298	5.03672	5.34566	5.55591	5.84352	6.1802	6.41969	5.72116	5.7241	5.60412
ARFIP2	5.25841	4.96231	4.8721	4.95513	5.40821	5.54917	5.51667	4.92761	5.67626	5.03672	3.89103	4.72632	5.29158	5.35343	5.15432	5.11243	4.96046	5.05348
ARFRP1	5.83076	5.44358	5.5633	5.82337	4.77542	4.02455	5.89394	5.13263	5.14481	5.03672	5.31255	5.21904	5.49107	5.27874	4.80328	5.1498	5.11432	5.84209
ARG2	4.29562	3.49658	2.28008	2.65481	3.38183	1.95009	3.45303	3.74343	2.75056	2.5147	3.89103	1.9778	2.57975	4.56634	3.51586	3.86977	2.86934	3.28142
ARGLU1	8.68783	8.69056	8.47512	7.99098	6.97035	7.93895	8.6494	8.66845	8.17453	8.83654	8.19219	8.21835	8.49626	8.32532	8.38108	8.70332	8.32765	8.20737
ARHGAP1	6.40724	6.39199	6.13806	6.8331	5.20206	6.53368	6.21705	6.07924	6.72204	6.16434	6.7425	5.85347	5.38047	6.15258	5.70307	6.8618	7.03728	6.03159
ARHGAP10	3.83928	4.64401	4.51454	4.28849	4.16696	4.18459	2.24237	3.90134	4.18502	4.54814	3.47851	3.87921	3.91699	4.68678	4.2578	4.32672	4.21103	4.2568
ARHGAP11A	7.10985	6.80862	7.03182	6.31436	6.35836	6.79164	6.50083	6.23571	6.53413	7.02964	6.98239	7.1304	7.17535	6.552	7.08327	6.66931	6.88308	7.18921
ARHGAP11B	3.16799	3.20625	3.3219	2.65481	2.25386	1.95009	1.16601	2.03503	2.75056	3.20959	1.9135	1.9778	2.36419	2.84574	3.11964	3.19714	2.5621	3.28142
ARHGAP12	3.16799	2.8424	2.28008	2.65481	3.38183	3.11058	2.57909	4.17318	3.02896	4.22346	3.97805	3.77981	2.36419	2.35779	2.69913	3.86977	4.21103	3.46795
ARHGAP15	8.75161	8.85343	8.77946	8.61523	8.98871	8.49167	8.42238	8.78956	8.63065	8.39124	8.35954	8.49788	8.38965	8.56944	8.71493	8.39632	8.05097	8.40594
ARHGAP17	7.00907	6.7819	6.26408	6.40734	4.56178	6.20074	6.1428	4.99923	6.51166	6.75838	6.4546	6.62883	5.98252	6.11012	6.11117	6.25471	6.17957	6.52759
ARHGAP18	5.35543	5.14117	4.51454	5.07334	5.12624	5.0643	5.51667	5.47172	5.45856	5.31821	5.47096	4.67191	6.03823	5.40117	5.81993	4.81956	5.17155	5.21857
ARHGAP19	5.4016	5.46613	5.0506	5.5245	4.31091	4.84224	4.69366	5.06747	4.664	5.36021	5.44064	4.61537	5.64252	5.05828	5.21959	4.39056	5.56235	5.54314
ARHGAP19-SLIT1	3.16799	3.8793	3.65205	3.83229	2.7343	3.11058	3.74836	1.35002	1.95043	3.20959	4.21145	3.29524	3.6572	3.40966	3.98496	3.45776	3.23415	4.35468
ARHGAP21	2.93671	2.8424	4.34236	3.53547	2.25386	3.84451	2.57909	3.36386	3.46298	4.12943	3.59321	4.14191	2.76725	3.31315	3.93401	4.11626	3.61034	3.6331
ARHGAP23	4.47905	5.48834	4.93408	4.52817	2.25386	4.18459	4.82609	3.90134	5.36136	4.54814	3.97805	4.77874	5.02368	5.57772	5.03851	4.99411	6.09335	5.41287
ARHGAP24	5.48973	5.63492	5.39719	5.40933	3.38183	5.2567	5.16307	5.52122	5.14481	4.39492	5.17198	5.05866	5.40893	5.9428	5.87499	5.18623	5.22659	5.24434
ARHGAP25	6.71209	6.39199	6.68046	6.91982	5.93812	6.39327	6.94138	6.32205	6.95641	6.69414	6.63948	6.84094	7.01801	6.88141	6.71956	6.49149	6.91694	6.74173
ARHGAP26	3.16799	2.6974	3.4964	2.8441	0	1.95009	3.08125	3.12858	3.02896	3.38261	4.13777	3.67306	2.93316	2.35779	3.29139	4.11626	3.69084	4.35468
ARHGAP27	5.65131	6.06255	5.39719	5.31649	4.44179	4.4596	4.82609	6.0458	4.81846	5.13677	4.74563	4.87821	5.66629	5.3775	5.08596	5.50743	5.90372	5.43541
ARHGAP30	6.49504	6.48329	6.92902	6.68002	4.31091	5.9785	6.61508	6.45537	6.44206	6.57434	6.52854	6.97055	6.43399	6.33568	6.33386	6.89519	6.70071	6.76861
ARHGAP31	1.22115	3.20625	1.83648	3.01141	0	1.54069	3.27908	0	2.40527	1.74734	2.89856	1.56524	3.08194	3.50011	1.40503	3.9567	1.6334	2.81539
ARHGAP33	3.36727	3.58167	4.34236	3.64134	2.25386	2.26863	3.60824	3.90134	4.491	3.53708	3.35389	1.9778	3.45374	4.12956	4.33838	4.18988	4.78821	4.44634
ARHGAP35	4.08542	5.02443	4.14681	4.58234	2.7343	4.69049	3.08125	3.12858	4.491	5.5894	4.4123	4.36406	4.82685	4.48006	3.64819	5.47835	5.85214	5.19233
ARHGAP4	5.09943	5.57392	5.5633	5.75426	4.96146	4.74286	5.25992	5.3673	5.25715	5.47935	4.84157	5.25649	4.73993	5.17271	4.74536	4.51035	5.56235	4.86703
ARHGAP45	6.99408	7.32286	7.19262	6.85527	5.84658	6.48838	7.37886	7.19594	7.25587	7.22415	6.89564	6.67105	6.8309	6.77672	6.5181	7.24523	6.93358	6.83795
ARHGAP5	6.99408	6.87756	6.73371	6.57705	7.26367	6.76655	6.11718	6.32205	6.39372	7.24672	7.08397	7.43809	6.64006	6.62417	6.66593	6.76876	6.86584	7.14885
ARHGAP6	3.54233	3.49658	4.14681	3.2971	3.09409	3.52372	3.60824	4.04365	3.93776	4.61906	3.59321	3.97219	3.6572	3.88292	3.93401	3.9567	3.33779	4.09628
ARHGAP9	3.54233	4.68305	4.34236	4.78074	3.62161	4.69049	3.99339	3.74343	4.58009	4.02884	4.53217	4.14191	4.06736	4.0115	4.17246	4.32672	4.31628	4.40124
ARHGDIA	8.24418	8.48225	8.43817	8.4096	7.46177	8.36789	8.21456	8.34329	8.20986	8.4312	8.50948	8.12524	7.69767	8.0237	7.77555	8.31228	8.27639	8.27143
ARHGDIB	10.8156	10.8311	10.8411	11.0773	11.319	11.238	11.0221	11.0885	11.0368	10.8609	11.0263	10.9469	10.6682	10.6682	10.5584	10.598	10.5782	10.6732
ARHGEF1	3.83928	4.52013	3.65205	4.4133	1.52846	4.10679	3.45303	4.29203	4.29438	4.39492	3.06682	3.87921	4.13705	4.0115	4.17246	4.39056	3.43448	4.09628
ARHGEF11	1.87289	2.14697	3.65205	3.64134	0	3.39871	1.16601	0	2.75056	3.20959	3.47851	3.43247	3.21681	2.70069	3.58354	4.18988	3.00146	3.28142
ARHGEF12	5.20734	5.14117	4.5935	5.035	3.38183	4.18459	4.54784	4.68854	4.81846	4.22346	4.34841	3.29524	4.64743	4.60761	4.77461	5.18623	5.4279	4.93189
ARHGEF18	7.19096	7.04424	7.20524	6.61653	4.87144	5.81687	6.77109	7.22611	6.85294	7.32305	6.63948	6.65711	6.67563	6.13856	6.37264	6.78073	6.92528	6.4522
ARHGEF19	3.96759	3.66203	4.2479	3.2971	0	0.96692	3.60824	0	2.75056	3.6766	3.79843	3.29524	3.45374	3.31315	3.20807	4.11626	3.69084	3.9784
ARHGEF2	7.35246	7.60792	6.91371	7.63502	4.96146	6.88781	6.98453	7.40818	7.14343	7.16614	6.92878	6.9013	7.13334	7.2828	7.29995	7.20141	7.53382	7.1213
ARHGEF26	1.22115	2.53619	1.83648	2.43688	2.7343	3.39871	1.16601	3.36386	1.95043	0	3.06682	1.9778	0.871627	1.90711	1.90575	3.19714	3.23415	3.17825
ARHGEF3	4.64177	4.33644	4.66835	5.25109	5.0462	5.10489	4.7614	4.77271	3.79618	5.93342	5.13459	4.92548	4.94814	4.99746	4.62203	4.18988	4.03719	4.1518
ARHGEF39	3.36727	4.60389	3.79253	3.91906	0	4.4596	3.60824	4.50386	2.75056	4.31173	4.4123	2.78195	3.45374	3.88292	3.8812	5.18623	3.76708	3.91563
ARHGEF40	0	1.90426	1.19263	3.16132	0	2.26863	0	2.4976	2.75056	2.5147	1.9135	1.56524	1.80289	3.50011	2.81629	4.39056	1.92723	3.70909
ARHGEF6	6.28941	6.74548	6.98866	6.31436	6.35836	6.5776	6.06452	5.66029	6.46563	6.66091	6.13299	6.25611	6.47494	6.3109	6.324	6.63018	6.33793	6.99038
ARHGEF7	6.53701	6.23008	6.21498	6.79919	5.58855	6.18189	5.394	6.17514	6.31804	6.18786	5.95137	6.29262	6.22585	6.74932	6.29401	6.53451	6.42287	6.47415
ARHGEF9	3.16799	4.06809	3.79253	4.82635	3.62161	4.79341	4.10189	4.77271	4.18502	3.53708	4.21145	4.67191	4.38636	3.88292	3.8812	4.62095	4.78821	4.2568
ARID1A	6.88456	6.71755	6.35752	6.69239	4.96146	6.06333	6.55908	6.34972	6.39372	7.27993	6.82697	6.59998	6.44777	6.65403	6.72706	6.80436	7.28428	7.10733
ARID1B	6.47358	6.77288	6.58708	7.06006	4.67255	6.77915	6.73785	6.0458	6.06377	7.33363	6.93966	6.46251	6.39185	6.63419	6.52672	7.36131	7.62371	7.34023
ARID2	6.3377	6.53755	6.68046	6.3616	5.0462	6.00018	6.44012	6.37686	6.46563	6.6269	6.55708	6.12049	6.40603	6.23391	6.30407	6.64334	6.77644	6.485
ARID3A	4.64177	4.9937	5.1584	5.37904	3.09409	5.14437	3.74836	4.99923	4.7433	5.72418	5.13459	5.18058	4.9864	5.08775	4.65386	5.79379	5.11432	4.96326
ARID3B	1.87289	4.60389	4.2479	3.83229	1.52846	4.02455	4.29709	4.04365	4.29438	4.31173	3.59321	3.55778	3.6572	4.56634	4.08175	3.86977	4.50622	4.61384
ARID4A	6.23944	5.80383	5.91029	5.14709	3.82716	5.29229	5.70045	5.52122	5.54962	6.32144	6.43935	5.46284	6.61586	6.29835	6.48309	6.37006	6.36272	6.41865
ARID4B	7.52922	6.91903	7.41541	7.3683	4.96146	7.27334	6.89689	6.89161	6.70233	7.92962	7.75435	7.90118	7.67442	7.33903	7.7127	7.88912	7.7465	8.01869
ARID5A	5.68903	6.28186	5.97069	6.08966	5.89308	5.66228	6.59665	6.79428	7.14343	5.96098	6.2425	5.82882	7.19998	6.73076	6.61832	6.76876	7.00616	6.60918
ARID5B	5.4016	5.48834	4.8721	5.1826	5.0462	5.32701	5.1121	5.61541	4.88991	6.25619	6.1139	5.3286	5.19685	5.42445	5.62492	5.07406	5.19933	5.43541
ARIH1	6.51618	6.28186	5.81467	6.42227	6.0242	6.00018	6.33289	5.90371	5.82948	6.40408	6.27723	6.80347	6.59124	6.28569	6.52672	6.6169	6.63101	6.53805
ARIH2	6.51618	6.67944	6.50777	6.76446	6.73536	6.34326	6.28766	6.79428	6.41809	6.46309	6.71742	6.59998	6.33367	7.06301	6.54382	7.119	6.94182	6.92018
ARL1	6.26464	5.95502	6.13806	6.01283	6.32483	6.00018	6.24097	6.26507	6.23816	5.55364	5.83962	5.64333	5.56878	6.3109	5.76269	5.35575	5.51891	5.68161
ARL10	0	0.753427	2.28008	1.46774	0	1.54069	1.16601	0	1.28241	1.74734	3.06682	1.56524	0	0	0	2.68876	1.6334	1.59121
ARL11	6.51618	5.76797	6.02867	6.05175	5.98181	5.74164	5.55535	5.47172	5.41078	5.5894	5.47096	5.36335	5.02368	5.6585	5.52518	4.67322	5.19933	5.89185
ARL13B	6.78357	6.68906	6.11148	6.56364	6.2193	6.50364	6.33289	6.64596	6.74148	6.6096	6.77931	6.69852	7.26369	7.19751	7.25914	6.95975	7.25148	7.10733
ARL14EP	7.87025	7.65776	7.65512	7.76953	8.18615	7.66809	7.97882	8.06315	7.4923	8.00437	7.76663	7.84081	7.98434	8.25562	8.075	7.79789	7.56085	7.79287
ARL15	3.83928	4.8974	3.65205	3.91906	5.2741	3.52372	3.08125	4.04365	4.88991	4.39492	3.35389	3.97219	3.34013	4.68678	4.33838	2.4698	4.26462	4.20525
ARL16	6.7303	7.14555	6.94416	7.03113	7.29863	6.71505	7.69689	7.32699	7.22857	6.96305	6.96118	7.07906	7.27918	7.27	7.25914	6.53451	7.16254	6.56896
ARL17A	6.36126	6.13473	6.23974	5.88933	6.78552	5.93413	5.83228	6.14388	6.18234	5.98802	6.1139	6.2375	6.03823	6.26003	6.14517	6.12934	5.83453	5.85887
ARL17B	5.30774	4.43121	5.35249	4.22178	4.77542	4.57966	4.20279	5.19497	4.491	5.03672	5.05676	4.72632	4.90883	4.83317	5.08596	4.62095	4.85959	4.83347
ARL2	7.26775	7.22706	7.3487	7.18787	7.663	7.29103	7.3896	7.79785	7.44564	7.18962	7.10345	6.80347	7.03636	7.32672	6.98658	6.73227	6.75788	6.90411
ARL2BP	6.51618	6.35621	7.05989	6.40734	7.43058	6.7281	6.21705	5.9765	6.72204	6.36335	6.4546	6.73878	6.77734	6.80362	6.75669	6.40139	6.32538	6.61907
ARL2-SNX15	6.57779	6.66001	6.56766	6.59033	5.89308	5.88836	6.1428	6.37686	5.96798	5.90532	6.05508	6.31054	6.31875	6.68329	6.31407	6.18441	6.43461	7.08611
ARL3	8.53051	8.35205	8.56602	8.40585	8.96169	8.60212	8.7776	8.6794	8.79785	8.26978	8.16463	8.68464	8.51928	8.16865	8.42325	8.23178	7.93594	8.02985
ARL4C	2.32019	1.61229	2.28008	2.18007	2.25386	0	1.80233	0	0	0	2.22947	2.78195	0.871627	2.35779	2.5716	2.21155	1.26401	1.22775
ARL4D	0	1.61229	0	0.912987	2.7343	0	0	2.84732	0	0	0.942911	1.56524	1.41113	0	1.40503	0	0.766223	1.59121
ARL5A	7.87844	7.65776	7.67341	8.02071	8.14831	8.09821	7.49284	7.43426	7.36018	7.78292	8.05381	7.95912	7.57748	7.80604	7.61904	7.60953	7.66913	7.63137
ARL5B	6.88456	6.82617	6.76815	6.91982	7.79129	7.25542	6.44012	6.42967	6.46563	6.99005	6.91782	7.00397	6.99003	7.49014	7.55305	6.98065	7.37235	7.57664
ARL6	4.19434	4.47635	2.61888	4.0009	5.12624	4.88947	3.99339	4.85223	3.26223	3.6766	3.35389	4.21982	3.99413	4.7248	3.93401	4.62095	4.21103	5.36669
ARL6IP1	9.13311	8.7833	8.92393	8.99065	9.89606	9.44688	9.00419	8.8966	8.94348	9.07907	9.23459	9.1403	8.67675	9.0075	9.07967	8.77684	8.61232	8.7293
ARL6IP4	7.9266	7.85868	8.05448	7.94002	8.08963	8.02078	8.09495	8.02075	8.17453	7.97088	7.83815	7.88931	8.01706	7.64685	7.34453	7.38501	7.59262	7.39876
ARL6IP5	7.38729	7.68205	7.64589	7.65412	8.10946	7.29103	7.57042	7.60469	7.59207	7.08078	7.16038	7.50186	7.77622	7.33903	7.35425	7.66221	7.11227	6.896
ARL6IP6	7.87844	7.87563	8.10251	7.84903	8.71873	8.13297	7.36804	7.87604	7.93378	7.59341	7.8206	7.55544	8.1239	8.4944	8.61941	8.12323	8.10338	8.16077
ARL8A	5.30774	5.16894	4.03811	4.95513	4.77542	4.9352	3.60824	4.17318	4.39604	4.9292	5.0962	4.77874	4.44249	5.30407	4.48716	4.32672	3.97426	5.08234
ARL8B	6.57779	6.28186	6.37997	6.95104	7.01308	6.62023	6.53992	6.85346	6.39372	6.38386	6.52854	6.80347	7.03636	7.07041	7.07153	6.94919	6.70071	6.38429
ARL9	3.54233	2.14697	3.79253	2.65481	4.00704	4.18459	4.20279	2.4976	3.79618	4.39492	4.34841	4.14191	2.11066	3.50011	3.76939	2.68876	3.33779	3.3777
ARMC1	7.65843	7.56676	7.55017	7.30527	8.1387	7.62688	7.2314	7.52199	7.91678	7.01656	7.03407	7.5778	7.66855	7.92918	7.86666	7.46132	7.26469	7.39301
ARMC10	6.04952	5.97088	6.0568	6.08966	6.85763	5.95649	5.92381	5.82704	6.51166	5.69165	5.76817	5.82882	6.24175	5.84264	6.15632	5.92893	5.64549	5.19233
ARMC2-AS1	6.3377	6.12058	5.87912	5.8007	7.03398	6.10394	6.4193	6.55381	6.66208	5.96098	6.1139	5.94808	5.86421	6.02127	6.27366	5.69611	5.35566	5.58408
ARMC5	3.36727	4.1259	3.79253	3.91906	3.38183	4.02455	3.99339	3.56609	3.93776	4.02884	3.79843	3.67306	3.45374	4.12956	3.64819	3.67842	4.31628	3.3777
ARMC6	6.76603	7.18688	6.75104	6.81058	5.98181	6.66163	6.77109	7.24096	6.62068	6.30001	6.71742	6.73878	6.00133	6.89814	6.28387	6.05248	6.96629	6.54842
ARMC7	3.54233	4.96231	4.14681	3.73997	3.09409	4.4596	3.74836	2.84732	4.7433	4.47356	4.21145	4.21982	4.5486	4.7248	4.37703	4.51035	4.31628	4.20525
ARMC8	5.86411	6.01745	6.1898	5.88933	6.45451	6.75385	6.11718	6.20575	6.18234	5.40103	6.15183	5.61478	5.64252	5.63872	6.15632	6.01246	5.7241	5.52223
ARMC9	2.32019	4.3846	4.43102	4.28849	3.38183	4.97953	3.60824	4.92761	3.79618	4.22346	4.13777	4.55653	4.20353	2.84574	4.55617	4.32672	4.59256	3.91563
ARMCX2	3.36727	3.40614	3.4964	4.47187	4.77542	3.84451	3.99339	3.56609	4.29438	3.38261	4.64284	4.05954	3.99413	4.23868	4.21576	3.9567	4.89401	3.6331
ARMCX3	6.26464	5.69345	5.81467	5.86768	6.06539	6.18189	5.98175	6.07924	6.06377	6.30001	6.25997	5.67134	6.68729	5.69726	6.58568	6.60349	6.32538	6.00169
ARMCX5	5.20734	3.94501	4.43102	4.35224	4.56178	4.97953	4.6226	4.92761	5.36136	5.31821	5.27867	4.55653	4.59886	4.12956	4.03417	5.1498	4.75114	4.30657
ARMCX5-GPRASP2	3.16799	3.09486	3.4964	0.912987	3.38183	3.11058	0	2.4976	3.46298	4.31173	3.47851	3.55778	2.36419	2.70069	3.11964	3.33332	4.03719	1.59121
ARMCX6	5.30774	5.24917	5.39719	4.99562	5.98181	5.66228	5.62972	5.61541	5.14481	4.31173	5.34566	5.46284	5.59378	5.77178	5.71821	5.74577	5.35566	5.29453
ARMT1	6.86821	6.65019	6.76815	7.10702	7.52218	7.59874	7.52242	7.05178	7.48078	7.04259	7.01362	7.04736	7.16705	7.19073	7.67053	7.34529	7.10495	6.90411
ARNT	5.35543	5.30028	5.39719	5.439	4.16696	4.79341	4.38561	4.29203	4.39604	4.31173	5.44064	5.01562	5.26069	4.93398	4.33838	5.22177	5.25335	5.19233
ARNTL2	4.5627	5.42066	5.1584	4.63456	4.67255	4.57966	5.80043	4.50386	5.08518	4.47356	4.4123	3.67306	5.16384	5.51402	5.60877	5.03464	6.04822	5.02403
ARPC1A	7.19096	7.18688	7.36003	7.17029	7.83958	7.08329	7.20732	7.32699	7.26933	7.02964	7.17886	7.1304	7.40458	7.48461	7.23304	7.15621	7.02956	7.29779
ARPC1B	8.36561	8.35205	8.31544	8.57905	8.54033	8.61271	8.59474	8.17563	8.77444	8.32385	8.22814	8.41335	7.8815	8.1408	8.17438	7.68148	7.99262	8.09856
ARPC2	9.91421	9.75443	9.82152	9.72296	10.2375	9.87124	10.1648	9.93216	9.97113	9.86445	9.84359	9.76639	9.73942	9.56884	9.67591	9.59384	9.44627	9.36764
ARPC3	10.5444	10.4688	10.4377	10.2789	10.8459	10.4635	10.9907	10.849	10.891	10.1765	10.2651	10.154	10.3447	10.3886	10.4724	9.76619	9.65003	9.80323
ARPC4	8.7781	8.91621	8.8615	8.86514	9.78023	9.03648	9.06911	8.71706	8.82999	8.50327	8.55972	8.58511	8.58933	8.77137	8.62945	8.32867	8.54895	8.37128
ARPC4-TTLL3	2.93671	4.00786	3.79253	3.91906	3.62161	2.75017	4.20279	3.12858	3.63918	3.6766	3.79843	2.97406	4.32795	3.81405	4.21576	3.19714	4.41437	3.55289
ARPC5	9.52596	9.24938	9.38151	9.36561	9.94101	9.33831	9.59752	9.75985	9.54278	9.30556	9.12446	9.30128	9.25075	9.34306	9.64753	8.99534	8.9778	9.0977
ARPC5L	7.58029	7.68205	7.72692	7.60916	7.83958	7.65449	7.7562	7.59317	8.00791	7.52119	7.39983	7.50186	8.13246	8.00837	7.88689	7.61622	7.90253	7.49849
ARPP19	8.62597	8.49602	8.64228	8.74856	9.73627	8.8874	8.61777	8.46212	8.31093	8.62886	8.82035	8.70171	8.48294	8.56158	8.6825	8.83249	8.58625	8.62283
ARPP21	8.67848	8.41137	8.64228	8.66629	8.54762	8.59501	8.41714	8.35015	7.99986	8.99824	8.93898	9.02837	8.46272	8.39476	8.43475	8.80347	8.49111	8.76979
ARRB2	6.26464	6.6403	6.31156	6.12659	6.2193	6.39327	6.11718	6.37686	6.36893	6.51979	6.03492	6.27448	6.12654	6.45356	6.05267	6.25471	6.23431	6.41865
ARRDC1	5.04229	4.8974	4.8721	5.14709	4.67255	3.52372	5.0044	5.06747	5.08518	4.61906	4.84157	4.77874	4.64743	4.64774	4.55617	4.62095	4.59256	4.65285
ARRDC1-AS1	4.08542	3.8793	4.03811	4.52817	4.67255	4.10679	4.54784	4.99923	4.58009	3.6766	3.69947	4.05954	4.38636	3.81405	3.58354	2.68876	3.90845	3.3777
ARRDC2	4.64177	5.39738	5.0506	4.82635	1.52846	4.18459	4.20279	5.42045	4.81846	5.13677	4.64284	4.05954	5.71268	4.93398	5.71821	5.64467	5.51891	5.71885
ARRDC3	5.86411	6.09186	5.7472	6.57705	5.89308	6.45737	6.61508	5.06747	5.54962	6.89324	6.58507	6.31054	4.64743	4.7248	4.88603	5.81721	5.08483	5.64338
ARRDC5	3.69843	3.94501	3.12336	2.8441	1.52846	3.26183	2.85191	3.56609	3.93776	4.22346	2.70806	3.29524	2.11066	2.35779	2.10315	2.4698	2.17122	2.81539
ARSA	3.69843	3.30966	2.89306	3.53547	0	1.95009	3.99339	0	3.46298	3.53708	3.59321	3.29524	3.34013	2.97754	3.29139	2.68876	2.72388	2.81539
ARSB	4.85588	4.60389	4.8721	4.52817	4.00704	2.9416	3.60824	3.74343	4.06668	4.54814	3.79843	4.61537	4.64743	4.79795	4.33838	4.18988	4.67403	3.91563
ARSD	0	0	1.19263	2.8441	0	2.26863	0	1.35002	1.95043	0	1.9135	2.56027	2.11066	1.2481	0	0	1.6334	1.22775
ARSK	3.54233	4.1259	4.03811	3.64134	1.52846	3.84451	3.27908	4.17318	3.79618	3.53708	4.13777	3.67306	3.74909	4.3883	3.82638	2.21155	4.15538	3.70909
ARV1	6.40724	6.92718	6.66226	6.56364	6.99187	6.85249	6.59665	6.834	6.57805	6.83485	6.57115	6.84094	7.35426	6.63419	6.9292	6.94919	7.05259	6.49576
ARVCF	2.66114	2.53619	0	3.53547	0	2.9416	1.16601	3.56609	3.02896	3.01296	2.70806	1.9778	4.13705	3.66561	1.06958	3.77726	4.26462	4.1518
AS3MT	6.61746	6.77288	6.98866	6.28199	5.0462	6.3262	6.50083	7.16513	6.88826	6.6096	6.42393	6.46251	7.30968	7.0024	7.18482	6.93855	6.55778	6.78626
ASAH1	6.23944	6.18999	5.81467	5.55191	6.10543	5.86492	5.83228	6.17514	6.36893	5.44072	5.47096	5.85347	5.66629	6.03646	5.79159	5.38739	5.56235	5.31899
ASAH2B	2.32019	2.53619	1.83648	1.46774	3.62161	2.75017	1.16601	2.4976	1.95043	2.5147	1.9135	1.56524	2.93316	2.97754	2.4317	0.932009	3.23415	3.17825
ASAP1	4.64177	4.06809	5.39719	5.37904	3.38183	5.36092	3.99339	4.40183	4.95798	4.87227	5.24398	4.97126	5.16384	4.76183	4.7155	5.11243	5.49669	5.43541
ASB1	5.35543	5.30028	4.5935	5.55191	5.0462	5.86492	5.0044	4.99923	5.71611	5.40103	5.24398	4.92548	5.71268	5.57772	5.17641	4.99411	5.14322	5.38996
ASB16-AS1	1.87289	3.73815	2.89306	3.73997	2.7343	3.26183	3.60824	3.36386	3.93776	3.80381	3.21748	3.67306	3.08194	3.58523	3.71006	3.45776	3.69084	3.6331
ASB3	6.23944	6.34408	6.42384	5.86768	6.90378	6.54847	6.70383	6.42967	6.09434	6.27827	6.34428	6.14066	6.25748	7.0851	7.32489	6.25471	6.29994	6.88785
ASB6	4.64177	4.3846	4.43102	5.40933	4.31091	4.02455	4.69366	5.61541	5.02298	3.80381	4.9745	4.82933	4.32795	4.07174	4.62203	4.72367	4.99257	5.34304
ASB7	5.09943	5.37371	4.8721	5.60522	4.87144	5.2567	4.469	4.59916	5.5048	4.98396	4.84157	5.01562	4.49652	5.35343	4.85897	5.1498	4.75114	5.56376
ASB8	5.89672	6.30707	5.7472	5.97283	5.34271	6.06333	6.4193	5.9765	6.34371	6.25619	6.03492	6.38006	6.39185	5.9428	5.76269	6.01246	5.8167	5.75515
ASCC1	5.4016	4.7581	4.51454	5.035	5.79854	5.22022	5.66552	4.77271	4.88991	4.22346	4.9745	4.77874	4.73993	5.95884	5.86142	5.32341	4.82434	5.24434
ASCC2	6.23944	6.39199	6.60624	6.39226	3.82716	6.21934	6.59665	6.34972	6.46563	6.34254	6.85022	6.54049	6.52779	6.37207	6.23209	6.94919	6.82183	6.55873
ASCC3	6.02023	5.90636	6.11148	5.93168	5.20206	6.10394	5.62972	5.61541	5.54962	6.59208	6.20691	6.41361	5.84352	5.89359	6.11117	6.57629	6.27405	6.18583
ASF1A	7.74155	7.85441	7.71814	7.98596	8.75064	8.16691	8.05503	8.09619	8.39314	7.79828	7.95001	7.84081	8.17035	8.16174	8.18531	7.89464	7.74178	7.81453
ASF1B	7.98841	8.20222	8.24382	8.48974	8.2047	8.45289	8.44315	8.50582	8.35578	8.46528	8.06876	7.90118	8.73691	8.80281	8.65916	8.52279	8.72891	8.70863
ASH1L	6.71209	6.00209	5.99997	6.14471	5.53091	5.81687	6.1428	5.74607	5.86537	7.32305	6.97182	7.47828	6.31875	6.03646	6.64232	6.81603	6.98237	7.04272
ASH1L-AS1	4.39025	3.8793	5.1584	4.4133	4.67255	4.10679	3.27908	2.84732	4.06668	4.31173	3.69947	4.36406	4.38636	3.58523	4.29865	4.25992	4.21103	3.28142
ASH2L	7.64889	7.61298	7.7093	7.85454	8.31127	8.03135	7.61687	7.86649	7.79179	7.55775	7.5207	7.66395	7.67442	7.99288	7.96827	7.96971	7.87695	7.73497
ASIP	0	0.753427	0	1.86743	1.52846	0.96692	1.16601	0	0	2.18145	1.50833	1.56524	0	1.2481	0.631718	0.932009	1.26401	0.740719
ASL	5.25841	4.68305	5.87912	4.58234	5.64398	4.39561	5.43606	5.70382	5.54962	5.13677	4.93154	4.92548	4.90883	4.90115	4.93867	4.39056	5.08483	5.19233
ASMT	1.87289	1.61229	1.19263	1.46774	2.25386	0	2.57909	1.35002	2.40527	1.74734	1.50833	2.29823	2.11066	1.90711	1.40503	0.932009	1.6334	1.22775
ASMTL	4.29562	4.28661	3.65205	4.52817	4.44179	3.7453	4.38561	3.90134	4.58009	4.81301	4.58857	4.55653	3.83548	4.18515	3.58354	3.45776	3.90845	4.35468
ASNA1	6.59776	6.54816	6.85083	6.49469	7.56589	6.80401	7.13255	7.16513	7.32194	6.30001	6.3926	6.77794	6.69886	6.54139	6.84896	6.25471	6.4578	6.27603
ASNS	7.61989	7.71539	7.95334	7.14351	7.79129	7.36809	7.64404	7.77762	7.97543	6.89324	6.8152	7.09982	8.1153	8.21613	8.21496	7.65573	7.7512	7.46601
ASNSD1	7.38729	7.37147	7.59882	7.10702	7.3825	7.02103	7.96452	7.42128	7.34754	7.13017	7.18802	7.53272	7.51995	7.93325	7.97774	7.51959	7.14835	7.16243
ASPH	3.54233	1.61229	2.61888	1.86743	2.7343	2.9416	3.45303	2.84732	3.79618	3.01296	3.47851	3.77981	3.55906	2.70069	3.51586	2.68876	3.33779	3.91563
ASPHD2	3.83928	3.94501	2.28008	4.35224	2.25386	3.63876	4.54784	5.13263	4.664	3.80381	4.69515	4.29375	4.26708	3.50011	3.82638	5.29032	4.46103	3.9784
ASPM	8.50959	8.25822	8.26809	7.66671	6.62949	7.69493	7.91334	8.07148	7.78244	8.77188	8.18306	8.40086	7.69767	7.5496	8.18259	7.64922	7.76985	7.85272
ASPSCR1	5.09943	4.82943	5.10551	4.82635	4.00704	4.39561	4.88801	4.68854	5.08518	4.81301	4.88726	4.29375	4.82685	5.19996	4.80328	4.77241	4.41437	4.09628
ASRGL1	5.57278	5.22292	5.52353	5.73046	5.2741	5.63482	5.66552	5.13263	5.54962	6.14043	5.76817	5.293	5.40893	5.77178	5.64089	5.9713	5.88673	6.13163
ASS1	3.54233	3.73815	3.65205	3.73997	2.25386	1.54069	4.7614	4.50386	4.39604	1.74734	3.21748	1.9778	4.26708	3.81405	3.58354	3.5723	0.766223	1.88129
ASTE1	4.85588	4.82943	4.14681	4.47187	4.77542	4.4596	5.25992	4.68854	3.79618	4.9292	4.34841	4.97126	5.16384	4.76183	5.32222	5.32341	5.17155	4.89982
ASUN	6.99408	6.86063	6.73371	6.86623	7.01308	6.91089	7.40026	7.06853	6.85294	6.92157	7.16965	7.21844	7.50684	7.12829	7.29995	6.57629	6.62077	6.896
ASXL1	7.44354	7.07392	7.04593	7.00162	5.58855	7.1332	6.68651	7.18062	6.87071	7.47415	6.92878	6.82856	7.08125	6.91468	6.94215	7.21028	7.16958	7.35804
ASXL2	5.65131	5.44358	5.48263	5.31649	4.67255	5.48911	5.05925	4.04365	4.81846	5.62429	5.81619	5.69881	5.49107	5.49214	5.15432	5.64467	5.92051	5.58408
ATAD1	5.83076	6.13473	6.02867	6.34603	6.39112	6.47296	6.37674	5.90371	5.86537	6.6096	6.2425	6.46251	5.98252	6.66385	6.38217	6.23745	6.27405	6.67698
ATAD2	7.61009	7.44145	6.92902	7.06957	6.14439	7.15269	7.2314	6.92877	6.92274	7.59341	7.51344	7.69838	8.7453	8.36798	8.843	7.86685	8.06236	8.41448
ATAD2B	5.04229	4.72106	5.35249	5.25109	4.96146	4.69049	5.05925	4.59916	4.7433	4.9292	4.74563	5.72576	5.43683	5.75351	5.50786	5.50743	5.33075	6.04631
ATAD3A	5.72579	5.24917	5.1584	5.3481	3.38183	4.97953	5.21231	4.92761	5.41078	5.44072	4.7944	4.82933	4.38636	5.27874	4.88603	5.38739	5.60452	5.79056
ATAD3B	3.54233	3.8793	3.12336	2.8441	2.7343	2.9416	3.27908	4.29203	1.28241	2.5147	2.89856	2.78195	4.26708	4.2903	4.08175	2.21155	3.61034	4.03854
ATAD3C	0	3.09486	2.28008	2.65481	3.09409	3.11058	1.16601	3.12858	3.02896	2.5147	1.9135	2.97406	2.11066	2.14998	2.4317	2.21155	3.00146	2.67086
ATAD5	7.35246	6.95934	7.14098	7.08842	6.25534	7.0316	7.20732	7.2111	6.88826	7.61959	7.57754	7.38835	8.55473	8.1652	8.3474	8.37675	8.06991	8.47014
ATAT1	4.98279	5.02443	4.73951	4.99562	3.82716	4.57966	5.0044	4.04365	4.88991	4.31173	4.34841	4.49518	5.02368	3.66561	4.33838	4.77241	4.55004	4.09628
ATE1	5.95979	5.7497	6.11148	5.77767	6.39112	5.63482	5.25992	5.52122	5.59308	5.78712	6.40835	6.21864	5.90474	5.6585	5.76269	6.09142	5.79865	5.9241
ATF1	5.99033	6.10629	5.91029	6.10824	6.25534	5.74164	6.24097	6.48061	6.55626	5.69165	6.27723	5.90155	6.44777	6.50908	6.77851	6.07208	6.15139	6.18583
ATF2	6.86821	6.43836	5.71225	6.19773	7.01308	6.5776	5.70045	5.42045	6.31804	6.51979	6.43935	6.43009	6.5535	6.76765	6.82119	6.57629	6.67125	6.65793
ATF3	4.78798	4.56262	4.51454	4.91347	4.31091	5.02254	5.89394	4.59916	6.44206	3.6766	5.17198	5.10046	8.53872	8.68482	8.87712	8.16945	7.74178	8.1909
ATF4	9.93201	10.0673	10.0678	9.62957	9.20225	9.28632	9.90697	9.86185	10.0473	9.47524	9.54718	9.41951	9.94406	10.0628	10.0069	9.82803	9.8363	9.88126
ATF5	7.26775	7.24673	7.03182	7.27269	6.83399	7.17192	7.91334	7.7571	7.65494	7.05544	6.83864	7.08948	8.62917	8.49715	8.24139	8.54049	8.37104	8.40309
ATF6	7.02391	6.62033	6.44528	6.50874	6.83399	6.60616	6.11718	5.90371	5.86537	6.01457	6.42393	6.29262	6.14358	6.36004	6.4742	6.43205	6.44625	6.50645
ATF6B	0	3.58167	3.79253	4.0009	3.82716	4.4596	2.57909	3.56609	2.75056	2.78523	3.35389	2.97406	1.41113	3.74174	3.29139	3.19714	3.69084	3.3777
ATF7	4.92073	5.83882	5.48263	5.60522	6.2193	5.86492	5.66552	6.42967	5.45856	5.62429	5.61368	4.55653	4.82685	5.87681	5.73319	5.29032	5.08483	5.11063
ATF7IP	6.49504	6.72692	6.75104	6.97148	4.77542	6.04258	6.68651	6.62346	5.82948	6.5382	6.90677	6.79076	6.52779	6.79471	6.82819	6.81603	6.22082	6.71433
ATF7IP2	5.15439	4.93022	5.35249	4.82635	4.67255	5.02254	5.05925	4.59916	4.664	4.31173	4.69515	4.77874	4.78404	4.07174	4.2578	4.25992	4.99257	4.79911
ATG10	5.65131	5.88977	6.58708	5.28416	5.74884	6.27376	5.73455	6.0458	5.93458	5.93342	6.27723	6.05822	6.00133	6.06638	5.87499	6.03261	5.86954	5.85887
ATG101	6.85168	6.55869	6.46641	6.97148	6.73536	6.60616	6.46064	7.13364	6.87071	6.69414	6.63948	6.57054	7.01801	7.09239	6.5181	6.69483	6.90011	6.75075
ATG12	7.68667	7.85013	7.53024	7.58282	8.21389	7.66131	7.88325	7.7674	7.9082	7.72783	7.63892	7.51737	8.09355	8.08344	8.13545	7.64922	7.49512	7.51975
ATG13	6.07823	6.00209	5.99997	5.88933	5.93812	6.21934	5.98175	6.37686	6.34371	5.65836	6.25997	5.75222	6.28844	6.29835	5.79159	6.27177	5.9371	6.14537
ATG14	3.83928	3.58167	4.80733	2.8441	2.7343	3.52372	2.57909	3.56609	3.26223	3.01296	4.13777	4.14191	3.45374	3.20972	3.51586	1.89677	3.8395	3.9784
ATG16L1	1.22115	2.14697	1.19263	2.8441	4.44179	3.63876	1.80233	3.36386	4.06668	3.20959	3.79843	3.77981	3.34013	2.84574	3.02544	3.45776	3.43448	2.94675
ATG16L2	5.48973	4.93022	5.30636	4.87057	1.52846	4.57966	5.43606	6.23571	5.5048	3.80381	4.4123	3.77981	5.38047	5.69726	4.17246	4.67322	5.60452	5.58408
ATG2A	3.16799	3.58167	2.89306	4.07835	2.25386	2.26863	3.99339	2.4976	4.18502	4.02884	3.47851	2.56027	3.55906	3.81405	3.58354	3.67842	4.67403	3.6331
ATG2B	3.54233	3.09486	4.8721	4.4133	0	2.9416	4.29709	2.84732	3.02896	3.38261	2.89856	4.21982	4.06736	2.97754	4.41469	4.4517	3.8395	4.61384
ATG3	7.72349	7.82417	7.70041	7.87096	8.51082	7.97224	8.1015	8.05477	7.9672	7.69538	7.80283	7.98166	7.76526	7.69073	8.02415	7.6028	7.55548	7.70281
ATG4A	5.65131	6.01745	6.21498	4.87057	6.42316	5.02254	5.89394	5.47172	4.95798	4.61906	4.88726	4.43111	5.59378	5.51402	5.13189	5.35575	5.66555	4.61384
ATG4B	6.67498	6.00209	6.46641	6.40734	6.39112	6.12383	6.68651	6.73257	7.0373	6.36335	6.83864	6.61448	6.71033	6.65403	6.31407	6.60349	6.87449	6.51706
ATG4C	6.85168	7.11732	7.12778	6.52267	7.47711	7.06284	6.80359	6.60062	6.9056	6.6269	6.8152	7.02583	7.16705	6.76765	7.09491	7.30444	6.09335	6.90411
ATG4D	3.83928	4.18148	3.12336	4.68495	2.7343	4.10679	4.54784	3.90134	3.46298	3.6766	3.97805	3.55778	3.91699	4.52384	4.12782	4.99411	4.55004	4.89982
ATG5	7.5903	7.53511	7.07373	7.36057	7.8514	7.1332	7.63504	7.42128	7.34754	6.93553	6.97182	7.18969	7.39038	7.83674	7.82881	7.12839	7.05259	7.30393
ATG7	3.54233	4.64401	5.20942	4.15185	4.31091	4.18459	4.82609	4.50386	5.08518	4.31173	3.79843	3.77981	3.91699	4.52384	3.71006	4.56671	3.76708	4.44634
ATG9A	3.69843	4.47635	3.12336	4.0009	3.09409	3.63876	3.74836	3.12858	3.63918	3.38261	4.69515	2.97406	4.06736	4.0115	4.12782	4.62095	3.97426	4.35468
ATIC	8.90372	8.88307	8.54134	8.69731	8.91739	8.81279	8.7694	8.99187	8.78853	8.54028	8.76942	8.7051	8.49294	8.52435	8.09253	8.54049	8.58362	8.58299
ATL1	3.36727	3.49658	3.4964	3.4212	3.38183	1.95009	3.45303	3.56609	3.46298	4.12943	3.35389	3.29524	3.6572	4.34013	4.45138	3.19714	3.97426	3.78127
ATL2	6.04952	6.21684	6.21498	5.73046	6.57348	5.71567	6.57799	5.70382	6.31804	6.06624	5.61368	5.39728	5.96347	6.1802	6.62636	5.44866	5.56235	5.70035
ATL3	6.26464	6.17637	5.87912	6.39226	6.39112	6.08378	6.4193	5.86588	6.18234	5.98802	5.9077	6.05822	6.00133	6.16645	6.09966	6.5625	6.38708	6.3008
ATM	7.37577	7.01394	7.47917	6.89862	6.0242	6.44161	6.91187	7.29888	6.98931	7.13017	7.15104	6.88943	7.15869	7.1424	7.22246	6.94919	6.78564	6.86312
ATMIN	5.99033	6.26909	6.11148	6.23203	6.54465	6.23771	5.83228	6.07924	5.90039	6.55638	6.22482	5.94808	5.64252	6.00591	5.83389	5.84025	6.35038	6.28847
ATOX1	8.49901	8.46275	8.59509	8.71257	8.92859	9.06761	8.97952	8.66295	8.96017	8.80647	8.60486	8.57773	8.34249	8.43544	8.42325	8.03109	7.94007	8.48372
ATP10D	3.96759	3.66203	2.89306	3.83229	3.82716	4.4596	5.05925	4.50386	3.46298	3.80381	2.70806	4.36406	4.78404	4.60761	4.37703	3.77726	3.8395	3.78127
ATP11A	0	0	0	0	0	0	0	0	0	0	0	0	0	0	0	0	0	0
ATP11B	5.09943	5.48834	5.7472	5.25109	4.67255	5.48911	5.394	4.92761	4.95798	5.69165	5.83962	5.87771	5.40893	5.55679	5.34189	5.84025	5.27961	5.68161
ATP11C	5.68903	5.19618	5.20942	5.77767	3.38183	5.36092	5.394	4.50386	5.5048	5.5894	5.9297	5.52555	5.06002	5.14494	4.83139	5.59133	5.7241	6.07532
ATP13A1	5.15439	4.7581	4.5935	5.14709	1.52846	5.0643	5.59301	5.56908	5.36136	5.55364	4.74563	5.293	4.69442	4.96607	4.7155	4.62095	5.64549	5.05348
ATP13A2	2.32019	2.97415	3.12336	3.01141	1.52846	1.95009	3.45303	3.56609	3.02896	2.5147	1.9135	2.56027	2.76725	3.66561	2.4317	2.4698	3.69084	2.81539
ATP13A3	6.53701	6.50524	6.54797	6.49469	6.54465	6.62023	5.1121	5.9765	6.39372	6.89324	6.40835	6.73878	6.33367	6.97112	6.31407	7.00124	6.65127	6.90411
ATP1A1	7.29246	7.51361	7.51003	7.60916	6.39112	7.457	7.19513	7.00034	7.44564	7.33363	7.31044	7.42992	7.05448	7.23091	7.17936	7.02155	7.68395	7.72128
ATP1A1-AS1	4.08542	4.1259	3.4964	4.52817	5.58855	3.52372	4.29709	4.40183	4.491	4.22346	4.28155	3.87921	4.44249	4.56634	4.12782	4.11626	4.21103	4.2568
ATP1A3	1.22115	0.753427	1.83648	0.912987	0	2.75017	2.24237	2.4976	2.75056	3.20959	1.9135	2.78195	3.45374	2.70069	2.81629	2.68876	0.766223	3.3777
ATP1B1	4.19434	4.8974	5.0506	5.035	3.38183	4.4596	3.60824	3.12858	4.58009	5.27494	4.64284	4.05954	4.49652	4.23868	4.45138	5.90726	4.96046	5.71885
ATP1B3	8.93545	9.07323	8.91628	9.14487	9.75527	9.19996	9.11515	9.02656	9.04868	8.89843	8.91987	8.87727	8.74251	8.70398	8.51494	8.80639	8.84778	8.56776
ATP23	7.08177	6.83486	6.85083	7.00162	7.50731	6.76655	7.21941	7.25566	7.29587	6.64401	7.10345	7.06857	7.01801	7.01012	7.22246	6.81603	6.83074	7.05733
ATP2A1	2.66114	2.97415	3.79253	2.18007	4.16696	3.7453	2.85191	2.4976	2.75056	3.6766	2.70806	4.21982	3.08194	2.97754	3.20807	2.21155	3.76708	2.81539
ATP2A1-AS1	4.19434	3.73815	3.12336	1.86743	2.25386	3.84451	3.87608	4.50386	4.39604	3.80381	3.06682	3.14357	3.55906	3.50011	4.08175	4.4517	3.43448	3.78127
ATP2A2	5.61258	6.30707	5.99997	6.46616	5.0462	6.86436	5.47693	5.42045	6.21052	6.81988	6.37667	6.07928	6.46142	6.24703	5.90175	6.28862	6.70071	6.58921
ATP2A3	6.78357	6.79086	7.05989	6.69239	4.00704	6.70188	6.19272	6.60062	6.51166	6.32144	6.66593	6.65711	6.20976	6.48713	6.12259	6.30528	6.85715	6.62888
ATP2B1	6.59776	6.81742	6.56766	6.68002	5.69736	6.86436	6.11718	6.45537	6.34371	6.66091	6.80333	6.95924	6.64006	6.36004	6.5007	6.78073	6.78564	7.02796
ATP2B4	2.66114	2.53619	2.61888	3.64134	1.52846	3.39871	1.16601	2.03503	2.40527	1.12347	3.47851	2.29823	2.93316	2.5394	1.40503	1.89677	2.72388	3.3777
ATP2C1	5.68903	5.95502	5.30636	5.55191	6.73536	6.02153	5.35068	5.56908	5.45856	5.93342	5.55827	5.69881	5.71268	5.6585	5.54229	6.07208	5.96973	5.9241
ATP5A1	10.0142	10.0562	10.0798	9.91068	10.7871	10.0113	9.9457	10.0591	9.91015	9.69836	9.76777	9.81741	9.7589	9.71175	9.68653	9.39223	9.55913	9.56841
ATP5B	9.73197	9.90959	9.63348	9.62473	10.3185	9.73888	9.80434	9.80302	9.78456	9.61407	9.59786	9.50369	9.38928	9.55836	9.42692	9.29966	9.50867	9.39521
ATP5C1	11.0709	10.9519	11.2289	10.7637	11.8441	11.0617	11.4815	11.6605	11.5218	10.7389	10.8906	10.8591	11.0403	10.9623	11.1769	10.6777	10.438	10.5089
ATP5D	5.48973	5.90636	5.97069	5.21725	5.58855	5.18279	5.51667	5.52122	5.67626	5.69165	5.58624	4.97126	5.02368	5.11663	4.91259	5.1498	5.45119	4.93189
ATP5E	12.1635	12.0218	12.1228	12.2138	13.161	12.5316	12.4712	12.5326	12.6022	11.8904	11.9874	12.1232	11.8242	11.98	11.9892	11.7291	11.5793	11.6307
ATP5EP2	10.355	10.1696	10.137	10.2666	11.1724	10.5561	10.6058	10.6225	10.703	9.92867	10.0783	10.1651	9.88705	10.0968	10.1174	9.89008	9.78794	9.81295
ATP5F1	9.93594	9.94012	10.0781	9.71692	10.7544	10.0611	10.3314	10.3841	10.3366	9.5878	9.66497	9.59789	9.95254	9.86322	10.1533	9.58534	9.31114	9.2549
ATP5G1	9.63868	9.54259	9.64743	9.73796	10.9799	10.0829	10.1155	10.1465	10.0609	9.60537	9.58752	9.75826	9.44359	9.47577	9.43724	9.35271	9.24603	9.21147
ATP5G2	11.0789	10.9222	11.0749	11.103	11.8126	11.3797	11.168	11.3471	11.3472	10.88	11.1718	11.1144	10.7949	10.7774	10.7076	10.6478	10.625	10.6231
ATP5G3	11.3871	11.2968	11.4372	11.5807	12.6396	11.7715	11.7961	11.8358	11.802	11.3106	11.4405	11.4831	11.2222	11.3437	11.4222	11.1455	11.0128	11.0366
ATP5H	9.67437	9.55184	9.55182	9.57215	10.6415	9.88004	10.1219	10.1583	10.1363	9.51993	9.66004	9.7219	9.61366	9.61891	9.91634	9.23591	9.13891	9.31237
ATP5I	10.6569	10.3235	10.6649	10.5218	11.4541	10.7356	10.8441	11.0309	10.9413	10.4379	10.4955	10.5823	10.3308	10.448	10.5511	10.2117	10.1661	10.1034
ATP5J	11.2014	11.0662	11.2211	11.5911	12.3995	11.7116	11.462	11.5434	11.5944	11.1803	11.2945	11.4811	11.2242	11.1989	11.1905	11.1662	11.0118	11.0653
ATP5J2	10.739	10.6416	10.838	10.4092	11.3754	10.8104	11.3133	11.3927	11.3653	10.6077	10.5692	10.5278	10.5147	10.5938	10.7689	10.1917	9.99234	10.0813
ATP5J2-PTCD1	6.07823	5.34965	4.93408	4.95513	4.31091	4.88947	5.05925	5.86588	4.7433	5.65836	5.55827	5.25649	5.54334	4.93398	5.43644	5.25645	5.60452	4.93189
ATP5L	12.2559	12.0908	12.1344	11.9676	13.1904	12.3646	12.5267	12.6575	12.5306	11.8958	11.9963	12.0674	12.0144	12.103	12.2369	11.7973	11.6213	11.5917
ATP5L2	7.00907	6.92718	6.69843	6.59033	8.00748	7.12336	7.31267	7.28462	7.17237	6.36335	6.54288	6.67105	6.67563	6.80362	7.08327	6.60349	6.26092	6.27603
ATP5O	11.6099	11.4574	11.7276	11.3993	12.609	11.7934	12.2115	12.1921	12.1908	11.2815	11.495	11.486	11.4291	11.5463	11.793	11.221	11.0284	11.0993
ATP5S	6.07823	5.6742	5.94081	5.60522	6.2193	5.39405	6.11718	5.90371	6.23816	5.55364	5.58624	5.49453	5.49107	5.2267	6.0041	4.99411	5.08483	5.29453
ATP5SL	5.83076	5.92277	5.7472	6.18027	6.35836	5.29229	5.73455	5.82704	5.79267	5.44072	5.97272	5.43043	5.06002	5.32896	5.13189	5.69611	5.88673	5.41287
ATP6AP1	6.45181	5.6742	6.11148	6.57705	5.40821	6.40957	5.86344	6.60062	6.09434	6.42402	6.40835	6.46251	6.10931	5.9747	5.74801	6.09142	6.29994	6.17247
ATP6AP1L	3.83928	3.66203	3.3219	2.65481	0	3.26183	3.45303	3.56609	3.02896	2.5147	2.70806	3.43247	3.21681	2.70069	3.11964	3.04674	3.12249	2.67086
ATP6AP2	6.28941	6.34408	6.60624	6.85527	7.33277	6.47296	6.4193	6.5774	6.41809	5.87667	6.55708	6.27448	6.59124	6.4422	6.31407	6.43205	6.16555	6.49576
ATP6V0A1	4.5627	4.47635	4.14681	4.87057	3.82716	3.52372	4.54784	2.4976	4.29438	5.40103	4.21145	3.87921	4.82685	4.18515	3.82638	4.03868	4.41437	3.9784
ATP6V0A2	6.31376	6.03264	5.5633	6.23203	6.51522	6.40957	6.16798	5.13263	6.41809	5.87667	6.03492	6.43009	5.49107	6.06638	5.28204	5.74577	5.62515	6.19906
ATP6V0B	8.80411	8.82098	8.77946	8.63459	9.82888	8.89898	9.24208	9.32721	9.09854	8.52189	8.65193	8.60339	8.77839	8.53241	8.7187	8.46466	8.27313	8.40309
ATP6V0C	5.48973	6.13473	6.42384	6.19773	5.79854	6.36012	5.47693	6.11192	6.23816	6.25619	6.18878	6.43009	6.0199	5.95884	5.99169	5.76998	6.26092	5.9241
ATP6V0D1	5.83076	6.00209	6.1898	5.65663	6.48518	6.00018	6.63327	5.86588	6.1536	5.78712	6.09456	5.85347	5.92458	5.59834	5.34189	5.47835	5.83453	5.75515
ATP6V0E1	8.65485	8.73071	8.80041	8.63139	9.80171	9.162	9.12482	9.04361	9.24877	8.4844	8.598	8.75502	8.61703	8.75997	8.77044	8.5821	8.26329	8.24933
ATP6V0E2	5.99033	5.76797	5.60201	6.18027	6.60176	6.3262	5.70045	6.32205	5.71611	6.30001	6.1139	6.18018	5.51744	5.735	5.4726	5.84025	5.78037	5.38996
ATP6V1A	6.97894	6.65019	6.42384	6.86623	7.28126	7.02103	6.61508	6.5774	6.95641	6.67762	7.02388	7.06857	6.57877	6.86448	7.16838	6.6169	6.90011	6.90411
ATP6V1B2	5.57278	6.62033	6.23974	5.65663	6.9485	6.00018	6.03745	5.94056	5.82948	5.87667	6.32781	5.77821	6.0199	6.4192	6.13392	5.72116	6.1371	6.19906
ATP6V1C1	4.64177	4.9937	4.43102	5.25109	5.12624	5.36092	5.35068	5.42045	5.20207	5.03672	4.69515	5.36335	5.40893	5.40117	5.17641	5.07406	5.25335	5.47948
ATP6V1C2	0	0	2.28008	1.46774	0	1.54069	2.85191	0	1.28241	2.5147	0.942911	2.29823	0	0	1.67701	0.932009	0.766223	1.22775
ATP6V1D	5.61258	5.78601	5.10551	5.63115	6.60176	5.54917	5.35068	5.47172	4.95798	5.47935	5.86267	5.85347	5.19685	5.02819	5.52518	4.77241	5.30541	5.29453
ATP6V1E1	8.52531	8.38498	8.32704	8.23458	8.21389	8.56986	8.62687	8.48101	8.49403	7.85813	8.16463	8.18959	8.22738	8.19935	8.41631	7.89464	7.87264	7.99612
ATP6V1E2	3.96759	4.18148	4.14681	4.0009	1.52846	3.39871	3.99339	3.12858	2.40527	2.5147	3.06682	3.14357	2.76725	3.58523	3.20807	3.5723	4.03719	2.12269
ATP6V1F	8.04041	8.17509	8.2129	8.40585	9.15534	8.7502	8.52825	8.76408	8.51112	8.41635	8.33503	8.3411	8.31644	8.15131	8.10122	8.11852	8.12889	8.05555
ATP6V1G1	8.78247	8.66153	8.73226	8.93448	9.91025	9.1811	9.16914	9.13389	9.14309	8.73643	8.91437	9.00655	8.73971	8.83358	8.71304	8.74971	8.4883	8.69234
ATP6V1G2	2.66114	2.53619	2.61888	2.65481	2.7343	2.75017	0	3.56609	2.40527	2.5147	2.70806	2.97406	2.76725	1.2481	2.5716	2.4698	2.5621	1.59121
ATP6V1G2-DDX39B	6.7303	7.08853	6.97398	6.8879	7.46177	6.7281	7.02643	6.89161	7.12874	6.66091	6.92878	6.76501	6.98058	7.09964	6.80711	6.83909	6.4919	6.58921
ATP6V1H	6.57779	6.90258	6.60624	6.61653	7.05458	6.85249	6.65123	6.62346	6.74148	7.02964	6.82697	6.86539	6.90269	7.11403	6.86265	6.98065	6.56847	6.74173
ATP7A	4.29562	3.8793	4.43102	4.28849	4.67255	4.18459	3.60824	3.74343	3.02896	4.39492	3.21748	4.05954	3.83548	3.74174	3.8812	3.67842	4.63387	4.49008
ATP7B	2.66114	0	0	0	0	0	0	0	0	1.12347	0	0	0	0	0	1.89677	0	0
ATP8A1	4.64177	4.52013	4.14681	4.99562	3.62161	4.02455	4.38561	3.90134	4.58009	4.9292	4.13777	4.72632	3.55906	3.58523	4.41469	4.03868	4.15538	4.72783
ATP8A2	4.19434	2.97415	1.83648	3.4212	3.38183	2.9416	3.74836	2.4976	2.40527	1.12347	3.89103	1.9778	2.76725	2.35779	1.67701	3.45776	2.72388	2.81539
ATP8B2	4.08542	3.66203	3.4964	5.07334	3.38183	3.7453	4.10189	4.50386	3.02896	4.75121	4.47348	3.29524	4.5486	3.40966	4.74536	4.51035	4.15538	4.49008
ATP8B5P	6.02023	5.98657	6.31156	5.97283	6.2905	6.10394	6.00987	6.29384	6.12427	6.0914	5.83962	6.12049	5.94416	6.29835	6.26338	5.69611	5.40422	5.47948
ATP9B	5.68903	5.05451	5.6397	4.47187	4.56178	4.74286	5.25992	4.99923	5.08518	4.9292	5.34566	4.77874	5.61836	4.79795	5.39936	5.59133	5.38014	5.64338
ATPAF1	6.76603	6.65019	6.85083	6.69239	7.15339	6.37679	6.66898	6.64596	6.66208	6.71047	6.7425	6.87746	6.36305	6.40756	6.4472	6.83909	6.4578	6.485
ATPAF2	5.65131	5.05451	4.93408	4.95513	4.96146	4.9352	5.62972	5.70382	5.45856	4.81301	4.64284	5.18058	5.13006	5.02819	5.01419	4.72367	5.49669	4.96326
ATPIF1	10.1922	10.2595	10.3366	10.3352	11.2062	10.479	10.7802	10.6727	10.7625	10.1883	10.2345	10.3702	10.3364	10.3804	10.395	10.0169	9.89163	9.98425
ATR	6.3377	6.00209	6.23974	4.99562	5.84658	6.00018	5.62972	6.23571	5.67626	5.51698	5.31255	6.18018	6.28844	6.22067	6.33386	6.18441	6.09335	6.15898
ATRAID	8.47221	8.52317	8.78787	8.36779	9.63047	8.8461	8.91034	9.39849	8.86144	8.18467	8.27615	8.60339	8.78655	8.53241	8.63743	7.9853	7.98466	7.98852
ATRIP	3.69843	2.8424	3.92054	4.0009	3.38183	3.26183	3.87608	2.4976	3.02896	4.02884	3.35389	3.29524	2.57975	4.34013	4.21576	4.11626	4.0975	3.6331
ATRN	2.66114	2.35466	2.61888	3.64134	3.62161	2.5294	2.24237	3.56609	1.95043	4.22346	2.89856	2.97406	3.45374	4.0115	2.5716	3.19714	3.43448	3.17825
ATRNL1	3.83928	4.00786	4.66835	5.11069	4.77542	5.29229	4.469	4.59916	4.29438	5.08761	5.34566	4.87821	4.20353	5.17271	5.43644	5.18623	4.99257	5.90806
ATRX	9.21942	8.96455	9.06913	9.21942	7.17236	8.77556	8.62233	8.74337	8.44743	9.50362	9.35328	9.40499	9.23096	8.84009	8.78309	9.21182	9.36733	9.33803
ATXN10	7.72349	7.96149	8.08212	7.90324	8.09958	8.04705	7.90587	7.86649	7.54857	7.76739	7.90075	7.74524	7.72622	7.52826	7.79709	7.68148	7.53382	7.46052
ATXN1L	3.36727	3.58167	3.65205	3.53547	3.09409	3.39871	3.74836	3.12858	3.46298	3.20959	3.21748	4.14191	2.36419	3.50011	3.37016	3.19714	3.8395	3.85002
ATXN2	6.86821	6.87756	6.80179	6.87711	4.56178	6.62023	6.44012	6.29384	6.46563	7.08078	6.61253	6.97055	6.56619	6.68329	6.17838	6.97024	6.95002	6.77747
ATXN2L	7.43247	8.08687	7.75295	7.92961	4.77542	7.44123	6.99863	7.59317	7.61333	7.57569	7.47655	7.29243	7.98906	8.18919	8.10985	8.28315	8.20624	8.09503
ATXN3	5.53185	5.24917	4.5935	5.31649	4.77542	5.32701	4.69366	5.19497	5.67626	5.23034	5.9297	5.46284	5.26069	5.32896	5.03851	4.39056	4.31628	4.76391
ATXN7	4.92073	4.60389	4.80733	5.37904	4.16696	5.76716	4.94738	4.59916	4.491	5.18432	5.37802	4.77874	5.54334	5.61867	5.64089	5.50743	5.7241	5.85887
ATXN7L1	4.5627	4.52013	4.51454	4.99562	4.16696	5.32701	4.94738	4.59916	4.7433	5.27494	4.88726	5.61478	4.20353	4.7248	4.85897	5.59133	4.78821	4.61384
ATXN7L2	2.66114	3.20625	1.19263	3.4212	2.25386	2.75017	3.27908	3.56609	3.93776	1.74734	2.48852	3.14357	3.21681	2.97754	3.44485	3.04674	4.0975	3.55289
ATXN7L3	4.85588	4.86381	4.66835	5.40933	4.00704	4.84224	4.6226	5.06747	4.39604	5.27494	4.84157	5.01562	5.09546	4.83317	3.93401	4.95241	5.19933	4.86703
ATXN7L3B	7.44354	7.56676	7.29065	7.96572	8.19545	7.47259	7.04013	6.89161	6.9056	7.81348	7.65881	7.58518	6.74423	7.02543	7.07741	7.78607	7.44957	7.53549
AUH	4.29562	3.66203	3.79253	3.91906	4.31091	4.02455	4.29709	4.29203	4.88991	5.08761	5.24398	4.67191	4.5486	4.83317	4.80328	5.03464	3.33779	4.20525
AUNIP	3.96759	3.94501	2.89306	3.2971	3.62161	2.75017	3.27908	2.4976	3.46298	3.53708	3.97805	3.29524	4.44249	4.48006	4.37703	4.25992	4.03719	4.49008
AUP1	7.13739	7.2402	7.45823	6.7877	7.29863	6.67517	7.46263	7.58154	7.63428	6.71047	6.55708	6.79076	7.68027	7.71454	7.66273	6.97024	7.61858	7.23491
AURKA	6.91671	6.85209	6.76815	6.71681	6.62949	6.60616	6.78743	6.68991	6.92274	6.84967	6.71742	6.54049	7.15869	6.60392	6.75669	6.68213	6.04822	6.4522
AURKAIP1	8.58655	8.59145	8.61888	8.5989	9.07695	8.64747	8.85328	8.9106	9.02111	8.62456	8.63194	8.56659	8.45933	8.35894	8.21229	8.10431	8.20624	8.19751
AURKAPS1	2.66114	3.40614	3.12336	2.18007	2.7343	3.39871	3.60824	2.84732	1.28241	3.80381	3.89103	3.97219	3.08194	2.70069	3.71006	4.25992	3.69084	3.70909
AURKB	7.5903	7.84153	7.93829	7.73407	7.87476	7.76625	7.96452	7.8178	8.02388	7.47415	7.71055	7.21844	7.65079	7.87527	7.96827	7.34529	7.51736	7.70745
AUTS2	6.47358	6.52686	6.48724	7.2224	5.12624	6.96701	6.4193	6.42967	5.96798	6.78945	6.79137	6.85322	6.68729	6.45356	5.91495	6.78073	7.03728	7.12824
AVEN	6.51618	6.74548	6.13806	6.14471	6.60176	5.95649	6.21705	6.40351	5.71611	6.01457	5.83962	6.47844	5.92458	6.0515	5.52518	5.99203	6.00164	6.63863
AVL9	5.20734	4.72106	5.94081	5.1826	4.87144	5.2567	5.30601	5.13263	4.88991	5.47935	5.40967	4.43111	5.54334	4.52384	4.7155	5.76998	5.25335	5.16561
AVPI1	1.22115	0	1.19263	3.53547	2.25386	1.95009	3.27908	0	1.28241	1.74734	0	1.9778	0	1.90711	1.40503	2.68876	2.86934	2.12269
AXIN1	4.64177	5.24917	4.93408	5.07334	4.44179	4.32864	5.25992	4.29203	5.36136	4.68665	4.7944	4.55653	4.44249	5.02819	4.77461	5.59133	5.47412	4.40124
AXIN2	0	2.14697	1.19263	1.86743	0	2.5294	0	0	0	0	1.9135	1.56524	2.93316	2.70069	3.02544	3.19714	2.72388	3.78127
AZI2	6.88456	6.92718	6.54797	6.8331	6.99187	7.01039	6.98453	6.774	7.00549	6.48224	6.93966	6.77794	6.6036	6.93103	7.17936	7.0711	6.50309	7.06458
AZIN1	7.13739	6.95934	7.07373	7.17029	8.06953	7.50328	6.83537	6.965	7.05295	7.4056	6.93966	7.1702	7.41864	7.64685	7.64303	7.21028	7.20427	7.38145
B2M	14.3216	14.1586	14.4438	14.3392	15.4476	14.6696	14.7836	14.8982	14.9191	14.284	14.2985	14.2757	14.1861	14.3362	14.4792	14.2747	14.0394	13.9354
B3GALNT1	4.5627	4.1259	5.1584	4.47187	4.67255	5.18279	4.88801	4.92761	4.491	4.47356	4.47348	3.77981	5.35145	5.02819	5.03851	5.07406	4.67403	4.61384
B3GALNT2	6.45181	6.10629	6.1898	6.48049	5.64398	5.93413	5.73455	5.90371	5.67626	6.23377	6.13299	6.2375	5.73533	5.78982	6.01639	5.92893	6.48062	6.70508
B3GALT4	3.54233	2.35466	2.61888	3.01141	2.7343	3.39871	2.57909	2.03503	3.26223	2.18145	2.70806	2.97406	1.80289	2.70069	2.69913	3.5723	3.12249	2.32943
B3GALT6	4.64177	4.56262	4.80733	5.37904	4.31091	3.93734	4.469	4.92761	4.29438	4.61906	3.35389	4.36406	3.45374	4.23868	3.98496	4.32672	4.89401	4.03854
B3GAT2	2.66114	3.09486	3.12336	1.86743	2.7343	2.9416	5.1121	2.4976	1.95043	2.18145	2.22947	2.78195	2.36419	2.35779	2.81629	2.21155	0.766223	2.12269
B3GAT3	4.78798	5.05451	5.30636	5.25109	5.84658	5.32701	5.05925	6.0458	5.54962	5.03672	5.01622	5.43043	4.94814	5.35343	5.08596	4.99411	5.4279	4.96326
B3GLCT	5.35543	4.60389	4.8721	3.83229	4.87144	5.0643	4.7614	5.13263	5.02298	5.08761	4.34841	4.36406	4.49652	4.60761	4.68501	4.62095	4.67403	4.2568
B3GNT2	5.15439	5.44358	5.35249	5.88933	5.84658	5.79223	4.38561	4.68854	4.39604	4.47356	5.88536	5.77821	5.29158	5.14494	5.99169	5.67062	6.03286	6.18583
B3GNT4	1.87289	2.6974	1.83648	3.01141	0	2.26863	0	2.03503	1.28241	1.74734	1.9135	2.78195	2.11066	2.5394	2.69913	2.4698	2.17122	3.17825
B3GNT5	2.66114	0.753427	3.12336	2.43688	4.16696	3.11058	2.85191	3.56609	2.40527	1.74734	3.89103	4.43111	2.57975	2.84574	4.37703	4.03868	1.92723	3.46795
B3GNT7	1.22115	1.90426	1.19263	3.2971	1.52846	2.26863	0	1.35002	2.40527	2.18145	0	0.985236	2.57975	0.755007	2.5716	1.49358	3.23415	2.51022
B3GNTL1	0	0	0	0	0	0	2.57909	0	0	0	0	0	0	0	0	0	0	1.22775
B4GALNT3	2.32019	3.66203	2.89306	3.01141	1.52846	2.75017	1.16601	4.04365	2.40527	2.78523	1.9135	3.43247	0	1.90711	2.10315	2.4698	3.52509	2.12269
B4GALT1	5.83076	5.16894	5.71225	6.46616	5.64398	6.36012	5.0044	5.3673	5.25715	6.04064	6.15183	5.90155	5.26069	5.6585	5.77721	6.23745	6.36272	6.31303
B4GALT2	3.16799	4.43121	3.79253	3.53547	3.82716	4.10679	3.87608	4.40183	4.664	4.81301	3.35389	3.55778	3.74909	2.5394	2.5716	4.39056	3.76708	2.67086
B4GALT3	6.31376	6.62033	6.62516	6.75269	6.39112	6.23771	6.55908	6.50543	6.46563	5.93342	6.07495	5.99315	6.22585	6.59368	6.324	6.47686	6.24768	6.27603
B4GALT4	3.96759	4.33644	4.2479	4.15185	4.56178	3.39871	4.7614	4.77271	4.18502	4.39492	3.69947	3.77981	5.02368	5.35343	5.49034	4.81956	4.67403	5.34304
B4GALT5	1.87289	3.73815	4.80733	3.91906	3.82716	4.10679	3.74836	2.84732	3.93776	4.81301	3.59321	3.77981	3.08194	3.50011	2.4317	4.67322	4.75114	3.9784
B4GALT6	5.04229	5.19618	3.79253	4.0009	4.56178	5.0643	4.469	3.74343	4.06668	5.36021	4.74563	5.10046	4.26708	4.96607	4.91259	5.67062	5.30541	4.89982
B4GALT7	4.47905	5.24917	3.4964	4.82635	5.0462	5.02254	4.88801	4.17318	5.36136	5.31821	4.53217	4.55653	4.9864	4.0115	3.76939	4.90947	4.67403	4.99396
B4GAT1	3.16799	3.8793	4.66835	4.35224	5.20206	4.57966	2.24237	3.90134	4.29438	4.54814	4.9745	4.43111	3.6572	4.0115	4.17246	5.07406	4.26462	4.86703
B9D1	1.87289	1.61229	0	2.43688	1.52846	1.95009	1.80233	3.12858	0	2.18145	2.70806	3.14357	0.871627	1.2481	0.631718	0.932009	2.5621	0.740719
B9D2	2.93671	3.81045	3.3219	3.64134	4.67255	3.84451	3.74836	3.12858	3.02896	2.5147	3.21748	3.55778	2.11066	4.18515	3.29139	2.68876	3.00146	3.55289
BABAM1	8.3362	8.29018	8.31544	8.53165	9.04126	8.68142	8.35272	8.59522	8.39928	8.30784	8.41907	8.26504	8.19098	8.25886	8.10985	8.25769	8.0886	8.1369
BACE1-AS	1.22115	3.09486	2.61888	2.43688	0	3.11058	1.16601	1.35002	1.95043	4.68665	2.48852	2.78195	2.57975	1.2481	2.5716	2.4698	3.43448	3.28142
BACE2	1.22115	0	0	0	0	0	0	0	0	0	0	0	0	0.755007	0.631718	0.932009	0	0
BACH1	5.09943	5.30028	5.35249	5.86768	5.98181	5.79223	5.0044	5.31211	4.88991	5.75599	5.71849	5.85347	5.96347	5.30407	6.07636	6.46207	5.70485	5.9865
BACH2	6.83495	7.45842	7.17988	7.37599	6.25534	6.99966	6.00987	6.48061	6.21052	7.41559	7.48401	7.50186	6.8621	6.87297	6.65023	7.61622	7.64912	7.42716
BAD	6.07823	6.35621	6.62516	6.57705	7.07489	6.50364	6.63327	7.19594	7.30897	7.08078	6.3926	6.77794	6.76639	6.88141	6.82819	6.68213	6.82183	6.84639
BAG1	7.58029	7.35344	7.41541	7.3683	7.81564	7.20963	7.59847	7.06853	7.55957	7.45489	6.96118	7.27429	7.40458	7.21096	7.26945	7.15621	7.1974	7.2155
BAG2	5.99033	6.31951	6.0568	5.93168	6.32483	5.48911	6.53992	5.56908	6.21052	5.78712	5.83962	5.99315	6.24175	6.34791	5.90175	5.79379	5.56235	6.00169
BAG3	5.20734	5.63492	5.30636	5.73046	4.44179	5.66228	5.394	5.52122	5.79267	5.84743	4.9745	5.97079	5.29158	6.06638	5.54229	5.35575	5.51891	5.11063
BAG4	5.04229	5.37371	5.10551	5.11069	5.20206	5.22022	4.6226	4.85223	4.81846	4.61906	4.88726	5.3286	5.26069	5.59834	5.76269	5.18623	5.08483	4.86703
BAG5	6.23944	5.7497	5.7472	6.18027	6.51522	6.04258	6.48087	5.56908	6.31804	6.46309	5.9077	6.38006	6.1935	6.56253	6.09966	6.33803	6.04822	6.50645
BAG6	8.2693	8.47114	8.41118	8.17852	7.67636	8.34266	8.14653	8.19101	8.10117	8.09423	8.19673	8.23251	7.93628	8.16865	7.89024	8.46466	8.53266	8.25884
BAHCC1	6.21379	6.50524	6.13806	6.12659	3.62161	5.42644	5.62972	6.11192	5.59308	6.18786	6.03492	5.82882	5.64252	5.55679	4.83139	6.11051	6.57908	5.89185
BAHD1	4.29562	5.59454	4.8721	4.52817	2.7343	3.11058	4.10189	3.90134	4.58009	4.9292	4.4123	4.49518	4.13705	4.18515	4.37703	5.25645	5.9371	5.05348
BAIAP2	3.83928	3.40614	3.12336	3.4212	2.25386	2.75017	2.85191	4.04365	2.40527	3.53708	3.47851	3.67306	2.57975	2.70069	1.06958	2.87883	1.92723	2.51022
BAK1	5.04229	5.59454	4.93408	5.14709	5.34271	4.57966	4.6226	4.04365	5.54962	4.31173	4.88726	4.92548	5.06002	5.32896	5.08596	4.67322	5.17155	5.21857
BANF1	9.29169	9.13964	9.22294	9.34617	9.84079	9.58957	9.56472	9.5463	9.6444	9.16156	9.28879	9.17249	9.21494	9.35523	9.09859	8.93774	8.84119	8.90113
BANK1	8.04768	7.97728	8.16846	7.17911	7.44626	7.40918	7.68822	7.83747	8.0318	7.53959	7.29357	7.55544	8.02627	7.7882	7.82532	7.91649	7.0218	7.07179
BANP	6.71209	6.58984	6.13806	5.55191	5.58855	5.60683	6.59665	6.14388	6.12427	6.06624	6.57115	6.05822	5.64252	6.06638	5.81993	5.59133	5.92051	6.18583
BAP1	5.99033	6.42691	6.0568	6.28199	4.77542	5.88836	6.21705	5.82704	6.59952	6.23377	5.81619	6.07928	5.92458	5.92659	5.45463	5.95027	6.75788	6.0896
BARD1	8.91967	9.15708	9.02353	9.11761	9.68764	9.11806	8.89157	8.76921	8.55574	8.85135	8.99743	9.06577	9.38571	9.34	9.65147	9.39418	9.25599	9.29552
BASP1	1.22115	0	0	0	0	0	0	0	0	0	0	0	0	0	0	0	0	0.740719
BAX	5.44634	5.55299	5.39719	5.28416	4.44179	5.60683	5.43606	5.74607	5.20207	6.34254	5.86267	5.55591	5.40893	4.93398	4.68501	4.4517	5.14322	5.47948
BAZ1A	8.63566	8.63689	8.62829	8.25139	6.70961	7.88171	8.36366	8.39731	8.31743	8.61591	8.58766	8.32356	8.72847	8.71818	8.51711	8.92162	9.01345	8.59305
BAZ1B	8.93545	8.92438	9.25061	8.53852	6.45451	8.1717	8.78982	8.37729	8.54472	9.2839	8.9738	8.90407	9.09966	9.04178	8.99986	9.34266	9.28058	9.33353
BAZ2A	6.76603	7.22706	6.88261	7.08842	6.10543	5.66228	6.48087	6.73257	6.39372	6.92157	7.15104	7.03663	6.57877	6.16645	6.54382	6.74454	7.21792	7.18256
BAZ2B	6.04952	5.98657	5.71225	5.3481	4.00704	4.88947	5.95307	5.9765	5.20207	6.48224	5.6406	6.16055	5.92458	6.15258	6.18928	6.58995	5.74311	6.53805
BBC3	2.32019	0	1.83648	1.46774	1.52846	0	3.45303	0	3.79618	0	0.942911	0.985236	4.06736	4.07174	4.03417	3.04674	3.97426	3.91563
BBIP1	7.12369	6.79977	7.03182	6.75269	7.41473	7.02103	6.57799	6.89161	6.66208	6.6269	6.71742	6.61448	6.27305	6.8898	6.64232	6.32175	6.29994	6.56896
BBOF1	1.22115	2.8424	1.19263	2.8441	2.7343	3.84451	3.08125	3.56609	0	3.20959	3.59321	2.56027	3.6572	3.20972	3.82638	3.86977	3.12249	3.9784
BBS1	3.16799	4.06809	3.92054	4.28849	3.09409	3.7453	4.38561	4.29203	3.79618	4.61906	4.47348	3.87921	3.83548	3.74174	3.82638	4.32672	4.31628	3.70909
BBS10	4.5627	4.23501	3.79253	4.35224	5.34271	4.02455	3.60824	4.50386	4.18502	4.02884	3.69947	3.55778	2.36419	2.84574	4.17246	3.77726	3.12249	4.09628
BBS12	3.16799	1.90426	3.12336	3.16132	3.62161	3.52372	3.87608	3.56609	3.46298	3.20959	3.21748	2.56027	3.55906	1.90711	3.71006	3.5723	4.21103	3.9784
BBS2	1.87289	3.66203	2.89306	3.2971	1.52846	3.63876	0	2.03503	3.26223	3.01296	3.06682	1.9778	2.11066	3.40966	3.44485	3.45776	3.43448	3.55289
BBS4	4.19434	5.71244	5.0506	4.52817	5.0462	5.22022	5.59301	6.0458	5.14481	4.81301	5.17198	4.49518	5.40893	5.51402	5.96656	5.53595	5.02399	5.05348
BBS5	2.66114	1.90426	1.83648	2.18007	2.25386	2.5294	0	0	0	1.12347	1.50833	2.78195	2.57975	2.97754	2.27675	0.932009	1.92723	2.32943
BBS7	6.18768	5.27495	5.25871	5.31649	5.12624	5.81687	5.70045	6.0458	5.45856	5.27494	5.88536	5.55591	6.03823	5.57772	6.31407	6.07208	6.07846	6.10375
BBS9	4.64177	3.30966	2.61888	4.22178	1.52846	3.84451	3.27908	4.59916	3.93776	3.01296	3.06682	3.67306	4.06736	4.43491	4.03417	2.87883	4.15538	3.91563
BBX	7.5903	7.56153	7.54024	7.70994	6.62949	7.56277	7.46263	7.19594	7.62384	7.92263	7.64558	7.68471	8.02627	7.68109	7.88354	7.87245	7.84213	8.09856
BCAP29	7.91073	7.83287	7.9608	7.52175	7.7157	7.84024	7.83691	7.92284	7.6753	8.02411	7.99765	8.21359	8.47623	7.81488	8.42325	8.17853	7.61858	7.93018
BCAP31	6.45181	6.07728	5.84725	7.04084	7.15339	7.01039	6.70383	6.48061	7.05295	6.75838	6.61253	7.01494	6.5016	6.19382	6.02859	5.5639	6.56847	5.79056
BCAR1	3.83928	5.05451	2.89306	2.43688	3.38183	3.26183	5.1121	4.40183	4.39604	3.20959	3.79843	3.87921	4.20353	3.74174	3.8812	1.49358	4.63387	3.70909
BCAR3	1.87289	2.14697	0	1.46774	0	0	0	2.4976	1.28241	1.12347	1.9135	0	3.55906	1.90711	1.40503	0	1.92723	2.32943
BCAS2	7.87025	7.67723	7.87649	7.78116	8.25006	8.03135	8.27375	8.19864	8.0553	7.90855	7.88394	7.8222	8.41442	8.46662	8.6902	8.47941	7.91515	8.05555
BCAS3	3.36727	4.7581	3.12336	3.4212	4.00704	4.10679	4.7614	4.17318	4.06668	4.39492	3.97805	3.29524	3.45374	3.88292	2.69913	4.03868	3.43448	3.17825
BCAS4	2.93671	2.6974	2.89306	2.8441	2.7343	2.5294	4.10189	2.84732	3.26223	3.53708	3.21748	3.67306	1.80289	3.09829	2.5716	1.89677	2.86934	2.32943
BCAT1	8.87128	8.77655	8.81284	9.08514	9.1019	9.0391	8.50867	8.46212	8.54472	8.76408	8.74171	8.7051	8.90614	9.01519	9.01985	8.94839	8.70972	8.98758
BCAT2	4.71673	4.8974	5.52353	5.57881	5.58855	4.9352	5.43606	5.56908	5.90039	5.23034	5.79238	4.87821	4.82685	5.51402	4.65386	5.29032	5.22659	5.64338
BCCIP	8.73817	8.26789	8.7014	8.48619	8.88899	8.32129	8.61777	8.60673	8.45922	8.73244	8.75101	8.69831	8.53872	8.19935	8.61739	8.31228	7.97665	8.40594
BCDIN3D	5.4016	4.47635	5.25871	4.28849	5.12624	3.93734	3.87608	3.74343	4.664	4.87227	4.58857	5.10046	4.86842	3.88292	4.68501	5.07406	5.22659	4.79911
BCKDHA	4.85588	5.19618	5.52353	6.07083	5.69736	5.91143	5.83228	5.47172	5.36136	5.27494	5.81619	5.72576	5.4642	5.27874	5.34189	5.29032	4.96046	5.26965
BCKDHB	3.96759	4.96231	3.65205	4.78074	5.2741	3.84451	3.60824	3.74343	4.18502	5.31821	4.69515	4.43111	4.32795	4.90115	4.03417	4.25992	3.90845	3.85002
BCKDK	6.69366	6.50524	6.40207	6.7877	6.14439	6.82846	6.61508	6.37686	6.79829	6.42402	6.03492	6.62883	6.17705	5.9747	5.74801	6.11051	6.38708	6.23806
BCL10	6.55755	6.31951	6.52801	7.2224	7.60831	7.24638	6.65123	6.01157	6.00062	6.5382	6.88442	6.76501	6.94216	6.65403	6.94215	7.01143	7.21792	6.65793
BCL11A	7.13739	7.27256	6.89825	7.25612	6.88089	7.36809	6.03745	6.11192	6.18234	7.02964	7.35988	7.1702	6.14358	6.6736	6.66593	7.21028	7.16254	7.00553
BCL2	5.99033	5.71244	5.60201	5.99297	3.62161	6.00018	5.30601	5.13263	5.14481	6.14043	6.01448	6.19954	5.09546	5.02819	5.45463	5.9713	5.54079	5.21857
BCL2A1	2.93671	3.30966	2.89306	3.16132	3.38183	3.63876	4.10189	3.36386	3.26223	2.5147	3.06682	3.29524	2.76725	3.09829	3.37016	2.87883	3.52509	3.46795
BCL2L1	6.02023	6.44972	5.99997	6.12659	6.10543	6.42568	5.98175	6.17514	6.48883	6.80474	6.79137	6.44639	6.16041	6.0515	6.28387	5.99203	6.44625	6.31303
BCL2L11	7.46544	7.65776	7.64589	7.80414	7.7027	8.14761	6.81956	7.43426	6.95641	7.82102	7.84974	7.80965	7.09006	7.59135	7.36391	7.90013	7.81095	7.89401
BCL2L12	5.68903	5.51022	5.91029	6.23203	6.90378	5.76716	5.92381	5.9765	6.18234	5.87667	6.27723	6.67105	6.44777	5.77178	6.4104	6.01246	6.33793	5.93995
BCL2L13	6.45181	6.6403	6.71618	6.75269	6.70961	6.81629	6.75457	6.774	6.53413	6.67762	6.29429	6.46251	6.8309	6.4192	6.4104	6.52031	6.42287	6.64831
BCL2L2	3.36727	3.94501	4.2479	3.4212	3.62161	4.10679	3.60824	4.29203	4.491	4.31173	3.89103	4.05954	5.09546	3.66561	4.65386	3.5723	4.7131	4.1518
BCL2L2-PABPN1	8.27551	8.49328	8.11594	8.41334	6.76066	7.91062	7.97169	8.27277	8.18167	8.19632	8.45364	8.32356	8.03542	7.81488	8.05726	8.23613	8.29261	8.18093
BCL3	2.32019	1.61229	3.3219	1.46774	2.7343	1.54069	3.08125	2.4976	3.26223	1.12347	2.22947	2.97406	4.49652	4.7248	4.68501	3.67842	5.19933	5.05348
BCL6	1.87289	1.90426	2.61888	2.8441	0	0	1.80233	2.84732	1.28241	0	0.942911	1.9778	3.45374	4.23868	3.76939	3.19714	2.17122	2.51022
BCL7A	8.42829	8.47948	8.20034	8.1384	7.79129	7.86998	7.90587	7.73629	8.0318	8.25872	8.05881	8.05789	7.25588	7.33903	7.52319	7.86123	8.20624	8.01495
BCL7B	6.76603	6.81742	6.86681	7.04084	6.88089	6.81629	6.81956	6.834	6.62068	6.16434	6.34428	6.77794	7.02721	7.06301	7.24876	7.37715	7.2247	6.98275
BCL7C	4.47905	5.55299	5.10551	5.25109	5.0462	5.18279	4.94738	4.77271	5.45856	4.9292	5.0962	3.87921	4.9864	4.7248	4.88603	5.1498	5.14322	5.41287
BCL9	2.32019	3.8793	3.65205	2.8441	3.09409	1.95009	2.57909	2.4976	1.95043	3.53708	3.06682	3.97219	3.6572	2.84574	2.69913	3.77726	2.37986	3.06714
BCLAF1	8.4668	8.59912	8.65153	8.54194	7.60831	8.4331	8.20851	8.16788	8.04751	8.93015	8.89772	8.83766	8.80272	8.36798	8.57437	8.60583	8.7073	8.87663
BCOR	6.49504	5.92277	6.0844	5.57881	4.16696	5.48911	5.394	5.66029	6.03254	6.36335	6.05508	5.94808	6.1935	5.51402	5.83389	6.28862	6.55778	6.69578
BCORL1	3.83928	2.8424	3.79253	4.22178	3.38183	3.84451	2.85191	4.99923	4.06668	3.20959	3.79843	3.67306	3.83548	4.3883	3.58354	4.25992	4.85959	4.65285
BCR	7.2426	7.18007	7.36003	7.17029	5.69736	7.15269	6.53992	6.87266	6.85294	6.55638	7.19711	6.79076	6.76639	6.59368	6.33386	6.7567	6.96629	6.74173
BCRP3	2.32019	2.6974	2.28008	2.65481	2.7343	2.5294	0	3.36386	2.75056	3.38261	3.06682	0.985236	2.36419	2.84574	1.90575	3.04674	3.33779	3.17825
BCS1L	5.79661	5.34965	5.25871	5.3481	5.2741	5.71567	6.28766	6.32205	5.7549	5.62429	5.6406	5.77821	6.30368	5.84264	5.88844	5.25645	5.38014	5.68161
BCYRN1	2.66114	1.24585	2.28008	3.01141	3.82716	3.39871	2.85191	2.03503	1.28241	3.01296	2.89856	1.9778	3.55906	2.84574	3.11964	2.4698	2.72388	2.51022
BDH1	6.28941	5.92277	6.16416	6.62945	6.06539	6.5776	6.95591	6.29384	6.87071	6.04064	6.25997	5.69881	6.59124	6.09569	5.97918	6.09142	6.23431	6.42992
BDH2	7.75939	7.55102	7.84456	7.82676	8.45767	7.82817	7.67949	7.93202	7.50373	7.59341	7.58449	7.50964	7.7979	7.7426	7.84614	8.08031	7.65916	7.66037
BDKRB1	0	0	0	1.46774	0	0	0	1.35002	0	0	0	0	0.871627	0	0	0	0	0
BDKRB2	0	0	0	0	0	2.5294	0	0	3.26223	0	0	2.29823	2.76725	3.88292	3.8812	2.87883	3.76708	2.67086
BDNF-AS	3.96759	1.61229	1.83648	2.8441	2.7343	2.5294	3.60824	2.84732	3.46298	3.53708	3.21748	2.29823	1.41113	2.35779	2.69913	2.68876	2.86934	2.51022
BDP1	8.05492	7.91305	7.78694	8.06894	5.34271	7.35973	7.82903	7.61613	7.34754	8.74439	8.43454	8.55536	8.41091	7.77013	8.26992	8.27893	8.30864	8.47014
BECN1	6.8009	6.4943	6.91371	7.03113	7.41473	7.09341	6.59665	6.774	6.09434	7.39553	7.16965	6.81607	6.78821	6.74932	6.60209	6.65639	6.56847	6.62888
BEND3	4.78798	5.11286	4.14681	4.58234	4.00704	3.84451	2.85191	3.36386	3.63918	5.47935	4.34841	4.87821	4.20353	3.20972	3.71006	3.86977	4.67403	4.61384
BEND4	4.92073	4.52013	4.5935	4.07835	4.56178	4.52088	4.6226	3.56609	1.95043	5.18432	4.58857	3.67306	3.55906	4.34013	4.45138	4.32672	4.89401	4.30657
BEND5	6.81803	7.03673	7.15407	6.99164	6.65669	6.98886	7.02643	6.40351	6.85294	6.83485	6.52854	6.49421	6.98058	7.28916	6.79288	6.73227	6.4578	6.60918
BEND6	4.78798	5.02443	5.60201	5.07334	4.16696	4.69049	5.0044	5.31211	4.7433	4.54814	5.0962	4.36406	5.06002	5.40117	5.30227	4.51035	4.7131	4.2568
BEST1	2.93671	1.61229	1.19263	0.912987	1.52846	0	0	1.35002	1.28241	3.01296	1.50833	1.9778	1.80289	2.70069	2.69913	1.49358	1.6334	1.88129
BEST3	6.78357	7.46963	7.54024	7.05048	7.75399	7.01039	6.99863	7.06853	6.66208	7.08078	7.36796	7.21844	7.04545	6.83001	6.324	7.43128	7.21111	6.99798
BEST4	7.9266	8.035	8.30375	7.99598	9.33027	8.19538	8.37452	8.68484	8.62543	7.73583	7.75435	7.88931	7.52646	8.01988	8.09833	7.46873	7.2972	7.31613
BET1	7.21701	6.52686	6.68046	7.21384	7.79129	6.94482	7.13255	7.29888	7.18663	7.11798	7.03407	7.01494	7.04545	6.76765	7.26945	6.85049	6.39911	6.71433
BET1L	5.15439	5.39738	5.48263	5.55191	3.82716	4.4596	4.94738	5.86588	4.39604	5.31821	4.93154	4.87821	5.32182	5.6585	5.24071	6.07208	5.38014	5.45761
BEX2	6.76603	6.44972	6.80179	6.86623	7.98619	6.96701	6.77109	6.26507	6.23816	6.87886	6.70472	6.67105	6.76639	6.46484	6.86265	6.43205	6.52521	6.36093
BEX4	4.78798	4.96231	5.10551	4.99562	5.74884	5.51945	4.10189	4.77271	4.58009	5.03672	5.76817	5.61478	4.90883	5.44737	4.88603	5.5639	5.05473	5.41287
BFAR	6.49504	6.56915	6.16416	6.66754	6.48518	6.54847	6.61508	6.20575	6.2919	6.59208	6.29429	6.52523	6.59124	6.74932	6.55229	6.64334	6.66129	6.49576
BFSP2	6.55755	6.91903	6.31156	5.99297	7.26367	6.66163	7.35713	7.22611	7.15797	6.25619	6.4546	5.61478	6.07421	6.56253	6.5774	5.90726	5.40422	5.60412
BFSP2-AS1	1.22115	2.97415	2.61888	2.8441	4.56178	0.96692	2.24237	3.90134	3.46298	3.01296	2.70806	2.97406	0.871627	1.90711	2.69913	0	1.26401	0
BGLAP	1.87289	1.90426	3.3219	0.912987	0	0	0	1.35002	1.95043	1.74734	0	0.985236	2.11066	1.2481	0	1.89677	1.6334	2.81539
BHLHB9	2.32019	3.09486	3.4964	3.16132	0	2.75017	3.27908	0	1.95043	3.53708	2.89856	2.78195	2.57975	2.84574	3.11964	4.03868	2.72388	4.40124
BHLHE40	3.16799	2.35466	3.4964	3.53547	3.38183	4.25841	2.57909	3.74343	0	3.38261	3.06682	4.43111	2.93316	2.84574	3.11964	3.67842	2.17122	3.17825
BICD1	4.47905	3.66203	3.79253	4.07835	4.31091	3.26183	4.54784	3.12858	3.26223	3.38261	3.47851	4.43111	4.94814	4.60761	4.7155	4.72367	3.52509	4.61384
BICD2	5.99033	6.13473	5.52353	5.8007	1.52846	5.57829	6.11718	5.82704	4.95798	6.11612	6.01448	5.82882	5.40893	5.6585	5.45463	6.09142	6.35038	6.04631
BICDL1	3.36727	3.30966	3.65205	2.65481	0	3.26183	3.60824	3.90134	1.95043	4.68665	3.35389	3.29524	4.06736	3.88292	3.64819	3.86977	4.15538	4.2568
BID	7.75939	7.50274	7.87649	7.71601	8.67947	7.75355	8.27375	8.37729	8.15291	7.85813	7.79686	7.85919	7.9557	7.69073	7.66663	7.40833	7.61858	7.40449
BIK	6.81803	6.42691	6.46641	7.13447	8.45767	7.6199	7.11971	6.89161	6.53413	7.20123	7.376	6.79076	6.59124	6.33568	6.59391	6.27177	6.52521	6.15898
BIN1	0	0.753427	0	2.18007	2.25386	2.26863	1.16601	0	3.02896	3.20959	0.942911	0.985236	2.57975	0	0.631718	0.932009	3.23415	3.17825
BIN3	6.45181	6.61024	6.48724	6.91982	6.48518	6.08378	5.43606	6.68991	6.51166	6.06624	6.43935	6.47844	5.94416	6.26003	6.0041	6.18441	6.22082	6.55873
BIRC2	6.55755	6.58984	7.05989	6.37701	7.19109	6.79164	6.73785	6.87266	6.74148	6.59208	6.71742	6.57054	6.67563	6.8898	6.84896	6.28862	6.99827	5.9241
BIRC3	5.4016	5.22292	5.1584	5.25109	5.12624	5.22022	7.02643	6.40351	6.57805	5.36021	4.74563	5.18058	7.90166	7.67625	8.01805	7.70678	7.34151	7.43278
BIRC5	9.30085	9.3346	9.20419	8.78655	10.1031	9.32118	9.40447	9.45053	9.29556	8.97815	9.23017	8.95622	9.10184	9.26136	9.47226	8.85529	8.4883	8.59556
BIRC6	6.74827	6.63035	6.31156	6.37701	5.12624	6.1628	6.19272	5.9765	5.67626	6.51979	6.15183	6.31054	6.27305	6.3109	6.52672	6.57629	6.4919	6.85478
BISPR	3.69843	4.06809	4.34236	4.22178	4.96146	2.5294	3.08125	3.36386	4.06668	4.39492	3.35389	2.56027	4.06736	4.12956	3.98496	2.21155	4.03719	3.3777
BIVM	4.5627	4.28661	3.79253	3.2971	3.38183	3.7453	3.74836	4.59916	4.06668	3.38261	3.21748	3.29524	3.74909	4.64774	4.29865	3.04674	3.00146	3.70909
BIVM-ERCC5	5.95979	6.52686	6.88261	6.29827	5.47086	6.20074	6.55908	6.32205	6.46563	6.71047	6.97182	6.16055	6.36305	6.46484	6.12259	6.7199	6.19345	6.67698
BLCAP	5.44634	5.51022	4.8721	5.21725	5.34271	5.81687	5.30601	5.3673	5.41078	5.31821	5.50065	5.18058	5.02368	5.2267	4.33838	4.99411	5.62515	5.08234
BLK	6.10638	6.44972	6.23974	6.24888	5.12624	5.95649	5.76787	6.0458	6.21052	5.84743	5.9077	5.85347	5.71268	6.40756	5.88844	6.20231	6.4919	5.95563
BLM	5.9286	6.39199	6.94416	6.57705	5.84658	6.54847	6.73785	6.34972	6.18234	6.78945	6.85022	6.49421	7.27918	7.16331	7.18482	7.28777	6.91694	7.08611
BLMH	7.74155	7.37744	7.36003	7.74004	7.7027	7.75355	7.70551	7.44712	7.71519	7.67888	7.72949	7.78423	7.49362	7.67625	7.69368	7.55485	7.98864	7.94204
BLNK	7.61989	7.87563	7.70041	7.93482	6.65669	7.59161	7.47277	7.7674	7.29587	7.90855	7.71055	7.59983	7.24802	7.66652	7.52319	7.25384	7.28428	7.23491
BLOC1S1	9.11591	9.06956	9.36191	8.93708	9.71702	9.14263	9.58121	9.94129	9.70508	8.72442	8.96584	8.87727	9.16368	9.09173	9.1991	8.43469	8.50509	8.57031
BLOC1S1-RDH5	3.36727	3.66203	3.92054	3.73997	4.00704	3.52372	3.27908	3.36386	4.06668	3.38261	3.35389	3.29524	4.13705	3.88292	3.51586	2.4698	3.97426	3.55289
BLOC1S2	6.59776	6.73623	7.01757	6.66754	7.29863	6.81629	7.32391	7.44712	7.25587	6.6096	7.25053	6.84094	7.50025	7.17709	7.56565	7.23657	7.10495	6.64831
BLOC1S3	1.87289	1.61229	2.89306	1.86743	1.52846	0	1.80233	1.35002	1.95043	2.5147	2.22947	3.14357	3.6572	3.09829	3.20807	3.33332	1.6334	4.09628
BLOC1S4	5.25841	5.46613	4.99352	5.46806	5.40821	5.8411	4.88801	5.42045	5.45856	5.27494	5.13459	5.01562	4.5486	4.96607	5.34189	5.35575	4.59256	5.21857
BLOC1S5	5.99033	6.29452	6.28801	6.05175	6.73536	6.18189	6.06452	6.37686	6.09434	5.98802	6.17043	6.54049	6.31875	6.34791	6.61832	6.37006	6.38708	6.15898
BLOC1S5-TXNDC5	6.97894	7.43574	7.64589	7.5008	8.28535	7.77257	7.02643	6.98278	7.0989	7.4056	7.51344	7.37138	7.26369	7.26356	7.35425	7.36925	7.7323	7.33424
BLOC1S6	8.23783	8.19885	8.12261	7.83236	8.45767	7.98317	7.76448	7.74674	8.07075	8.12501	8.01833	8.09971	8.13672	7.73796	8.16336	8.24047	8.03178	7.67466
BLVRA	5.83076	5.30028	6.21498	6.33028	6.54465	7.08329	6.28766	5.56908	5.86537	6.72661	6.85022	6.73878	5.84352	5.9747	5.5592	6.35413	6.1371	6.47415
BLVRB	7.25523	7.73874	7.81192	7.62215	8.29404	7.76625	8.11451	8.42359	8.33032	7.52119	7.76663	7.60709	7.79251	7.62189	7.67053	7.62951	7.66913	7.05733
BLZF1	4.29562	4.86381	4.66835	4.91347	5.47086	4.4596	4.69366	4.29203	4.7433	3.92071	4.69515	4.55653	4.73993	5.46993	5.54229	5.03464	4.67403	4.96326
BMF	3.96759	3.8793	3.79253	3.73997	4.44179	4.25841	3.74836	3.56609	3.79618	4.87227	3.97805	3.43247	4.86842	5.2267	4.68501	4.72367	5.08483	5.11063
BMI1	5.09943	4.9937	4.93408	4.82635	5.74884	5.32701	4.38561	5.06747	4.88991	4.98396	5.01622	5.18058	5.06002	5.17271	5.60877	5.47835	4.99257	5.79056
BMP2K	5.35543	5.87299	5.7472	6.08966	5.12624	5.71567	5.25992	4.92761	5.45856	5.31821	5.6406	5.18058	5.68967	6.00591	5.74801	6.16629	5.78037	5.62389
BMP3	7.89467	7.94552	7.85261	7.59605	8.28535	7.63383	7.76448	7.71518	7.58132	7.99107	8.04376	7.56293	7.6861	7.51205	7.47945	7.66221	7.32269	7.34023
BMP8B	0	0	0	0	0	0	0	0	0	1.12347	0	0	0	0	0	0	0	0
BMPR1A	2.66114	2.8424	3.92054	3.4212	3.62161	2.5294	3.27908	3.12858	2.40527	3.38261	3.97805	2.78195	2.36419	3.66561	2.69913	2.68876	2.37986	3.17825
BMPR2	5.83076	5.53176	4.80733	5.70627	3.82716	4.4596	5.16307	3.90134	4.81846	6.16434	5.81619	6.10003	5.06002	4.56634	5.19816	5.67062	5.38014	5.77296
BMS1	7.85374	7.7012	7.7093	7.78116	6.2193	7.20963	7.70551	7.10145	7.38512	8.03711	8.14125	7.71865	7.63281	7.51205	7.88354	8.00583	7.94418	8.17089
BMS1P20	5.9286	5.59454	5.99997	6.14471	6.54465	5.88836	6.24097	5.94056	5.45856	6.55638	6.40835	6.43009	6.34843	5.77178	5.84772	5.5639	5.58359	6.03159
BMS1P4	3.16799	2.14697	3.12336	2.65481	2.25386	2.9416	2.85191	2.03503	1.28241	2.5147	2.22947	1.9778	2.93316	2.97754	2.5716	2.68876	3.23415	1.22775
BMS1P5	4.08542	3.81045	3.3219	3.91906	2.7343	3.39871	3.08125	2.84732	2.40527	4.22346	4.4123	3.55778	3.83548	4.0115	4.03417	4.62095	3.43448	3.6331
BMS1P6	3.36727	2.6974	3.12336	3.4212	2.25386	3.26183	3.45303	3.12858	3.02896	3.53708	3.79843	3.43247	2.11066	2.84574	3.64819	3.86977	3.43448	3.28142
BMT2	3.54233	4.18148	3.65205	4.63456	4.56178	2.75017	4.20279	4.29203	3.26223	3.53708	3.21748	3.55778	4.13705	3.50011	4.83139	3.67842	4.46103	4.2568
BNIP1	6.67498	5.87299	7.07373	6.37701	6.57348	6.39327	6.57799	6.834	6.88826	5.98802	5.74354	5.90155	7.12479	6.66385	7.24876	6.83909	6.5142	6.17247
BNIP2	7.49768	7.32286	7.12778	7.64778	6.76066	6.9336	6.89689	6.45537	6.93967	7.52119	7.04419	7.61433	7.2081	7.0178	7.06563	7.37715	7.17658	7.20898
BNIP3	0	0	0	0	0	0	0	0	0	0	0	0	0	0	0.631718	0	0	0
BNIP3L	8.04768	7.79773	8.0263	7.99098	8.71226	8.47628	7.74787	7.7045	7.6753	7.91561	8.44221	8.19924	7.38323	7.58619	7.87005	8.08514	7.76055	7.41019
BOD1	6.04952	6.39199	5.7472	6.21498	5.47086	5.57829	6.63327	5.82704	5.82948	5.51698	5.55827	5.90155	6.05633	6.0515	6.22151	5.69611	6.00164	5.43541
BOD1L1	7.89467	7.75715	7.69146	7.2309	4.87144	6.29145	7.10675	7.25566	7.3727	8.33443	7.57056	7.85309	8.03542	7.57062	7.82182	7.95395	7.93594	8.29628
BOLA1	5.04229	4.93022	5.52353	5.14709	6.35836	5.0643	5.394	4.77271	4.81846	5.27494	5.58624	5.05866	5.92458	5.17271	4.83139	5.07406	4.46103	4.83347
BOLA2	8.97033	9.16916	9.14645	9.07573	9.96841	9.31254	9.76981	9.73384	9.71495	8.7835	8.90051	9.03646	8.84498	8.70636	8.96856	8.3489	8.53539	8.39448
BOLA2B	8.97033	9.16916	9.14645	9.07337	9.96841	9.31254	9.76981	9.73384	9.71495	8.7835	8.90051	9.03646	8.84498	8.70636	8.96856	8.3489	8.53539	8.39448
BOLA2-SMG1P6	5.86411	5.78601	5.52353	5.3481	6.14439	5.9785	6.03745	5.70382	5.59308	5.55364	5.58624	5.49453	5.32182	5.80764	5.68778	5.50743	5.05473	5.60412
BOLA3	7.06752	7.3042	7.54024	7.84903	7.94264	7.65449	7.73108	7.93202	7.8195	6.96305	7.58449	7.41344	7.74866	7.68109	7.7352	7.25384	7.13403	7.27921
BOLA3-AS1	3.96759	2.14697	1.83648	2.65481	3.09409	2.75017	2.57909	3.12858	1.95043	3.53708	3.69947	3.55778	1.80289	2.35779	1.90575	3.33332	1.26401	2.67086
BOP1	4.39025	4.68305	4.14681	4.35224	3.38183	4.25841	4.69366	4.29203	4.18502	4.87227	4.4123	4.21982	3.6572	4.18515	3.37016	3.86977	4.50622	4.03854
BORA	4.64177	4.23501	4.66835	4.07835	4.96146	4.18459	4.20279	4.50386	3.93776	4.61906	3.79843	3.97219	4.73993	4.79795	4.80328	3.77726	3.43448	4.65285
BORCS5	5.25841	5.87299	5.67643	5.55191	5.12624	5.10489	6.03745	5.13263	4.81846	5.75599	4.84157	5.05866	5.35145	5.14494	4.88603	4.39056	5.45119	5.16561
BORCS6	3.36727	4.18148	4.14681	3.16132	3.82716	3.63876	3.99339	4.04365	3.79618	2.18145	3.21748	2.29823	1.41113	3.94864	3.29139	3.86977	3.12249	3.91563
BORCS7	6.26464	6.38016	6.40207	6.23203	6.62949	6.1628	6.1428	6.17514	6.62068	6.211	6.25997	5.90155	6.44777	6.48713	6.2001	6.16629	5.8167	5.11063
BORCS7-ASMT	6.78357	6.77288	7.03182	6.33028	5.2741	6.3262	6.52051	7.16513	7.00549	6.72661	6.49942	6.47844	7.3247	7.0178	7.22246	6.94919	6.56847	6.78626
BORCS8	7.00907	6.68906	7.54024	6.76446	7.50731	6.59195	7.52242	7.50978	7.59207	6.87886	6.90677	7.11008	6.94216	6.72139	6.90295	6.58995	6.1371	6.22518
BORCS8-MEF2B	2.93671	2.6974	3.12336	3.01141	1.52846	3.63876	3.60824	3.12858	4.18502	2.5147	2.22947	3.77981	4.59886	4.76183	4.29865	4.03868	4.85959	3.55289
BPGM	4.29562	4.68305	4.14681	4.78074	5.53091	4.52088	4.82609	3.36386	4.39604	4.47356	4.21145	4.87821	4.73993	4.93398	4.93867	4.77241	3.90845	3.78127
BPHL	5.30774	4.18148	4.5935	4.35224	4.96146	4.79341	4.94738	2.84732	3.79618	4.54814	3.47851	4.36406	5.13006	4.23868	4.29865	4.11626	4.82434	3.28142
BPNT1	7.13739	6.71755	7.10101	6.08966	6.0242	6.04258	7.04013	6.947	7.0373	6.59208	6.37667	6.69852	7.38323	6.98685	7.3972	6.52031	6.58962	6.13163
BPTF	8.65961	8.82098	8.64228	8.26388	5.93812	7.51838	8.44315	8.24358	8.33032	9.23677	8.95516	8.76155	8.71143	8.30036	8.49531	8.62254	8.53539	8.70631
BRAF	3.16799	2.14697	3.79253	1.46774	0	1.95009	3.60824	2.84732	2.40527	3.20959	3.35389	3.14357	2.57975	3.20972	3.51586	3.86977	2.86934	2.94675
BRAP	5.79661	6.13473	6.16416	5.73046	5.40821	5.79223	5.70045	6.11192	5.71611	5.62429	6.27723	6.39693	6.1935	5.77178	6.4104	6.21999	6.07846	6.10375
BRAT1	5.79661	6.21684	6.28801	5.60522	4.44179	6.20074	6.21705	6.50543	6.2919	6.11612	5.74354	5.97079	5.29158	6.12441	5.67232	5.72116	6.48062	6.21218
BRCA1	6.45181	6.53755	6.48724	6.23203	4.16696	5.74164	6.46064	6.85346	6.51166	7.16614	6.54288	6.46251	7.30968	7.2375	7.15732	6.93855	7.23144	7.02052
BRCA2	7.38729	7.34737	7.52017	6.97148	4.87144	6.40957	7.2314	7.06853	7.08374	7.52119	7.73574	7.37138	7.98434	7.41656	7.97459	7.32092	7.28428	7.55106
BRCAT54	2.93671	3.81045	2.28008	4.07835	5.34271	3.11058	3.45303	2.84732	2.75056	2.5147	3.47851	3.43247	3.74909	3.20972	3.37016	1.49358	3.23415	3.6331
BRCC3	5.99033	6.04768	6.37997	5.75426	6.14439	5.74164	6.09109	6.64596	5.93458	6.87886	6.85022	6.39693	6.74423	6.77672	6.39164	6.30528	6.09335	6.3491
BRD1	5.09943	5.76797	5.60201	5.46806	2.25386	4.88947	4.94738	5.52122	5.08518	4.75121	5.52975	5.72576	4.44249	5.35343	5.17641	5.81721	6.46926	5.79056
BRD2	7.9423	8.08322	8.1749	8.12933	6.35836	7.69493	7.81316	7.63874	7.9082	8.07544	8.00802	7.797	8.41442	8.32532	8.34497	8.446	8.54624	8.38293
BRD3	7.10985	6.88595	6.54797	6.81058	5.58855	6.67517	6.19272	6.60062	6.53413	7.00337	6.75487	6.62883	6.37752	6.33568	6.43809	7.01143	6.8396	6.55873
BRD4	7.46544	7.66265	7.56003	7.78116	5.89308	7.57726	7.30134	7.43426	7.53749	7.99774	7.79686	7.73201	7.66266	7.66652	7.5275	7.91649	8.2829	8.03355
BRD7	7.58029	7.31667	7.58922	7.02136	6.18233	6.76655	7.61687	7.42128	7.08374	7.61959	7.5494	7.36282	7.7979	7.33289	7.59054	7.28777	7.62371	7.44949
BRD7P3	2.93671	2.8424	3.12336	2.65481	3.38183	3.11058	3.08125	3.36386	3.46298	3.01296	2.22947	2.97406	2.76725	2.35779	3.29139	3.5723	3.23415	2.67086
BRD8	8.10462	7.78881	7.88436	7.32923	6.2905	7.61288	8.05503	7.40818	7.59207	8.02411	7.79686	7.90118	8.13672	7.75184	8.0632	7.75001	7.59262	7.73497
BRD9	4.64177	5.32518	5.25871	5.25109	4.31091	4.74286	5.66552	5.61541	5.90039	5.44072	5.31255	5.10046	4.82685	5.35343	4.74536	5.64467	5.62515	5.54314
BRE	6.4297	5.98657	6.16416	6.24888	5.47086	6.47296	6.31045	6.68991	6.31804	5.93342	6.4546	6.76501	6.16041	5.95884	5.92803	6.4168	6.16555	6.28847
BRF1	2.93671	3.66203	3.12336	2.43688	0	1.95009	3.74836	2.03503	3.46298	3.20959	3.06682	3.14357	2.36419	1.90711	2.92465	2.87883	2.17122	2.67086
BRF2	4.5627	5.34965	4.5935	5.25109	5.93812	4.84224	4.29709	4.77271	5.02298	4.75121	4.28155	5.01562	5.40893	5.2267	5.49034	4.81956	4.78821	4.49008
BRI3	5.95979	6.2432	5.94081	6.08966	6.32483	5.9785	6.28766	6.11192	5.59308	5.90532	6.05508	5.82882	5.96347	6.23391	5.81993	6.28862	5.79865	5.84209
BRI3BP	7.62962	7.59262	7.29065	7.5148	6.85763	7.18144	6.80359	7.50978	6.76067	7.46455	7.70418	7.68471	7.15869	7.2828	7.0597	7.10003	7.11227	7.32219
BRICD5	0	2.14697	2.61888	0	0	0	2.24237	3.36386	3.26223	1.74734	2.22947	0.985236	2.57975	2.14998	1.90575	1.49358	2.17122	1.22775
BRIP1	6.07823	6.30707	6.13806	5.97283	5.20206	6.00018	5.43606	5.9765	5.36136	6.25619	6.29429	5.82882	6.97107	7.1424	7.43434	7.23657	6.98237	7.12824
BRIX1	8.69712	8.37905	8.56602	8.44658	8.54762	8.44895	8.88779	9.03511	8.70681	8.36053	8.55265	8.42984	8.96242	8.83792	8.90218	8.87216	8.62774	8.48372
BRK1	9.44008	9.35891	9.54686	9.66295	10.5338	9.95272	9.63411	9.92068	9.89286	9.50128	9.35734	9.5326	9.48427	9.39409	9.48337	9.1715	9.17784	9.06373
BRMS1	7.20404	7.17323	7.01757	7.38364	6.54465	7.62688	7.15791	7.40818	7.63428	6.74258	7.00328	7.49404	7.00874	7.07778	7.16286	7.0711	7.09018	7.14201
BRMS1L	4.29562	4.8974	4.8721	5.11069	3.62161	4.52088	5.47693	4.99923	4.39604	4.87227	5.31255	5.14108	4.64743	5.11663	5.17641	4.81956	4.21103	4.86703
BROX	7.28016	7.13854	6.85083	7.09775	7.5369	7.29103	6.95591	6.87266	6.74148	7.50256	7.10345	7.03663	7.44636	7.15638	7.43891	7.71304	7.16958	7.26669
BRPF1	5.65131	5.16894	5.30636	5.82337	4.44179	4.69049	4.6226	5.94056	5.86537	5.69165	5.20843	5.3286	5.82252	5.44737	4.98945	5.74577	5.86954	5.36669
BRPF3	2.66114	4.60389	3.65205	4.52817	3.82716	4.74286	2.57909	1.35002	4.06668	3.80381	2.89856	4.14191	4.06736	5.42445	5.24071	4.4517	5.02399	5.34304
BRSK1	2.93671	2.35466	2.28008	2.18007	2.25386	2.5294	2.24237	2.03503	3.26223	2.18145	2.48852	2.29823	2.11066	0.755007	2.27675	2.87883	1.26401	1.88129
BRWD1	6.53701	6.70811	7.26676	6.81058	6.42316	6.37679	6.33289	6.07924	6.2919	7.05544	7.12268	7.18969	6.57877	6.95522	6.68916	7.19248	6.88308	7.05733
BRWD3	4.08542	5.27495	5.52353	4.87057	1.52846	5.0643	4.38561	5.31211	4.88991	5.18432	5.66703	4.82933	5.26069	4.86756	5.19816	5.76998	5.02399	5.34304
BSCL2	6.86821	6.75467	6.52801	7.4287	6.54465	7.40918	6.98453	7.28462	7.58132	6.66091	6.89564	7.06857	6.27305	6.979	6.61832	6.90616	7.06019	6.97508
BSDC1	4.98279	5.7497	5.52353	5.1826	4.56178	3.84451	5.43606	5.86588	5.59308	5.27494	5.31255	4.97126	5.49107	5.27874	5.30227	5.11243	5.79865	5.68161
BSG	5.89672	5.95502	5.91029	5.99297	6.10543	5.86492	5.98175	5.78713	6.00062	5.65836	6.1139	5.87771	5.61836	5.84264	5.36131	5.29032	5.49669	4.93189
BSPRY	4.47905	4.68305	4.73951	4.58234	4.67255	4.25841	4.29709	3.90134	4.18502	3.80381	3.47851	3.29524	3.99413	3.50011	3.37016	4.03868	4.21103	4.72783
BST2	6.36126	5.73119	5.7472	5.93168	5.98181	5.86492	6.24097	6.32205	6.39372	5.31821	5.97272	6.36299	5.71268	5.49214	5.64089	5.32341	5.19933	5.47948
BTAF1	4.39025	4.1259	4.5935	4.87057	4.00704	4.79341	5.21231	4.85223	5.02298	4.54814	5.20843	4.82933	5.43683	5.02819	5.01419	4.86522	5.11432	5.02403
BTBD1	5.89672	5.73119	5.48263	5.60522	5.47086	5.54917	5.70045	5.52122	5.41078	5.65836	5.40967	5.94808	5.75762	5.51402	5.84772	6.05248	5.78037	5.41287
BTBD10	5.44634	6.23008	5.81467	5.55191	6.2905	5.66228	5.76787	4.99923	4.88991	5.62429	5.24398	5.21904	6.05633	5.82525	6.16739	6.12934	5.60452	5.13838
BTBD2	1.87289	2.97415	3.4964	2.8441	0	2.9416	2.85191	2.03503	3.26223	1.74734	3.21748	2.97406	2.93316	2.70069	2.5716	2.68876	2.72388	2.67086
BTBD3	0	0	0	0	0	1.95009	0	0	1.95043	3.01296	2.70806	1.9778	0	1.2481	0	1.49358	0	2.51022
BTBD6	7.09587	7.45842	7.31415	6.8879	6.32483	6.30893	6.91187	7.14947	7.0373	6.40408	6.3926	6.39693	6.5535	6.65403	6.55229	6.18441	6.60008	6.3008
BTBD7	4.39025	3.81045	3.65205	3.16132	3.82716	3.26183	3.27908	3.12858	3.46298	4.61906	4.69515	4.49518	2.93316	3.66561	3.20807	4.56671	3.8395	4.30657
BTBD9	0	3.09486	3.65205	2.65481	0	1.95009	1.80233	1.35002	2.40527	0	2.70806	2.56027	2.36419	2.97754	2.69913	0	2.5621	1.88129
BTD	4.5627	3.49658	3.12336	4.95513	4.96146	3.26183	3.08125	3.56609	4.18502	4.31173	4.69515	4.05954	3.99413	3.40966	3.93401	4.72367	4.0975	3.85002
BTF3	11.4882	11.3985	11.6133	11.5187	12.3049	11.7153	11.6541	11.6354	11.687	11.2399	11.4576	11.4034	11.2025	11.1802	11.097	11.006	11.0284	10.8902
BTF3L4	7.73255	7.82853	8.11594	7.66671	8.56208	7.92769	8.2266	8.30139	8.28466	7.53042	7.80283	7.65697	7.89664	8.13728	8.33027	7.83278	7.65415	7.58675
BTF3P11	3.54233	3.8793	3.4964	3.64134	4.31091	3.52372	3.99339	4.68854	3.79618	3.20959	4.06012	4.21982	2.93316	3.50011	3.82638	3.77726	3.61034	3.3777
BTG1	8.47761	8.54452	8.35564	8.45023	8.59057	8.45289	8.3306	7.68291	7.83768	8.46046	8.56324	8.40086	8.26289	8.42393	8.40232	8.6554	8.52719	8.54202
BTG2	7.74155	7.52976	7.26676	8.30474	7.63592	8.29959	6.83537	6.98278	6.7796	8.31854	8.598	8.16518	7.11618	7.53897	7.16286	8.00072	7.56619	7.53549
BTG3	7.6679	7.29163	7.82833	7.45797	8.25897	7.86408	7.73108	7.93202	7.4923	7.5487	7.7232	7.43809	8.76194	8.49165	9.02746	8.49402	8.22663	8.40879
BTK	8.43939	8.35205	8.22535	8.0878	8.11927	7.816	8.11451	8.30139	8.23751	8.51726	8.27185	8.31471	8.28224	7.83674	8.0483	7.87245	8.03949	7.62157
BTLA	1.22115	0	1.19263	1.46774	0	0	0	0	0	0	1.9135	0	0	1.2481	0	0	0	0
BTN2A1	6.21379	5.7497	5.39719	5.49656	6.54465	6.00018	5.89394	5.94056	5.36136	5.96098	5.79238	5.3286	6.27305	6.13856	6.12259	6.49149	5.98578	6.06089
BTN2A2	4.78798	4.64401	5.10551	5.07334	4.96146	4.84224	4.54784	5.06747	5.59308	4.75121	4.69515	4.21982	4.94814	5.27874	4.88603	5.22177	4.67403	4.89982
BTN2A3P	1.87289	2.14697	4.14681	0.912987	3.82716	2.26863	1.16601	0	2.75056	2.18145	2.48852	1.56524	3.08194	3.58523	3.51586	2.21155	2.37986	2.94675
BTN3A1	4.19434	4.47635	4.80733	3.01141	2.7343	3.26183	4.54784	4.59916	5.02298	4.22346	3.35389	4.05954	4.32795	3.09829	4.45138	4.25992	3.23415	4.72783
BTN3A2	4.19434	4.96231	4.03811	4.52817	4.77542	4.52088	4.469	5.70382	3.79618	4.31173	4.69515	4.49518	4.9864	3.94864	4.68501	4.11626	4.31628	4.49008
BTN3A3	4.29562	5.42066	5.35249	4.99562	4.67255	4.84224	5.30601	4.68854	4.491	5.62429	4.64284	4.29375	4.59886	5.08775	5.49034	3.86977	4.92762	4.69083
BTRC	3.83928	3.73815	5.0506	4.68495	5.12624	3.63876	4.38561	3.74343	3.02896	3.80381	3.89103	5.21904	3.6572	4.43491	3.29139	3.77726	4.26462	4.1518
BUB1	8.53051	8.60929	8.56112	8.31277	8.00748	8.3762	8.57134	8.5302	8.31743	8.50327	8.60486	8.52882	8.34249	8.14782	8.47985	8.12323	8.10705	8.4945
BUB1B	7.37577	7.44713	7.48953	6.8879	6.97035	7.33435	7.44214	7.25566	7.28266	7.57569	7.28507	7.30142	8.15783	7.51747	8.05428	7.93801	7.72276	7.5817
BUB3	9.85943	9.77151	9.72619	9.77332	10.2577	9.92182	10.1219	10.1796	10.1815	9.77412	9.77234	9.59971	9.89336	9.87278	9.92941	9.5578	9.40511	9.46125
BUD13	6.51618	6.98299	6.89825	6.42227	6.45451	6.53368	6.66898	6.26507	6.36893	5.31821	6.17043	6.38006	6.71033	7.27642	7.11792	6.66931	6.90011	6.84639
BUD31	8.91967	8.79002	8.77099	8.56567	9.16957	8.64747	9.40447	9.25223	9.2144	8.59847	8.598	8.61425	9.42803	9.58055	9.74312	9.16922	9.10259	8.94697
BYSL	7.5903	7.43574	7.03182	7.06957	7.41473	7.12336	7.61687	7.7571	7.1139	6.99005	6.98239	7.02583	7.26369	7.11403	6.91613	7.28777	7.13403	6.99038
BZW1	8.80411	8.66398	8.58063	8.38695	8.97256	8.69145	8.54756	8.23618	8.31093	8.41136	8.54555	8.63217	8.54835	8.56944	8.61335	8.38069	8.00054	8.22041
BZW2	8.17276	8.08687	8.08895	8.11562	8.52565	8.0366	8.16541	7.9043	8.19583	7.97764	8.01833	7.83463	7.73186	7.9534	8.13545	7.66221	7.46682	7.8059
C10orf10	6.93252	7.24673	6.95914	7.84903	7.46177	8.29082	6.4193	6.87266	6.53413	7.74379	8.31845	7.77135	6.17705	7.12829	7.10646	7.46132	7.59785	7.52502
C10orf12	1.87289	1.61229	1.19263	0.912987	0	0.96692	1.80233	2.03503	0	0	0.942911	0	0	1.2481	0	0	1.6334	0.740719
C10orf128	0	0	0	1.46774	2.7343	0	0	0	0	1.12347	0	0	0	0	1.06958	0	1.26401	1.88129
C10orf25	4.92073	5.44358	5.10551	5.439	5.84658	5.18279	4.88801	5.25473	4.95798	5.13677	5.71849	5.14108	4.64743	5.02819	5.15432	4.99411	4.78821	5.24434
C10orf76	3.96759	5.05451	5.10551	4.35224	5.0462	4.84224	5.30601	5.13263	4.81846	4.39492	4.64284	4.82933	4.78404	4.56634	5.28204	4.62095	4.63387	5.19233
C10orf88	3.54233	4.28661	4.66835	3.73997	4.31091	4.4596	4.10189	4.50386	3.79618	4.02884	4.64284	4.67191	5.13006	4.60761	4.91259	4.51035	4.78821	4.49008
C11orf1	6.71209	6.50524	7.23016	6.86623	6.99187	6.88781	7.09367	6.92877	7.15797	6.57434	6.71742	6.79076	6.71033	6.84735	6.77851	6.12934	6.62077	6.67698
C11orf21	0	1.61229	1.83648	2.18007	0	1.54069	0	0	1.28241	2.18145	0	2.56027	2.36419	3.20972	0.631718	2.21155	0.766223	1.88129
C11orf24	5.44634	5.42066	5.20942	5.37904	4.16696	5.18279	5.05925	5.47172	5.5048	5.40103	5.05676	5.52555	5.29158	5.6585	5.24071	5.18623	5.64549	5.71885
C11orf42	4.08542	3.73815	4.93408	3.83229	3.38183	3.39871	4.10189	4.68854	2.75056	3.38261	3.35389	3.67306	4.26708	2.70069	3.76939	3.33332	3.97426	3.17825
C11orf45	1.22115	3.09486	2.28008	3.64134	0	1.95009	2.24237	2.84732	2.75056	2.5147	1.50833	2.78195	2.36419	2.35779	2.4317	1.89677	2.37986	2.81539
C11orf49	6.76603	6.38016	7.04593	6.87711	7.26367	7.11345	6.97029	6.89161	7.00549	6.69414	7.00328	6.69852	6.82034	6.36004	6.34365	6.82761	6.61046	6.70508
C11orf54	7.28016	7.35344	6.92902	6.69239	7.41473	6.64796	6.81956	6.947	6.64153	6.92157	7.18802	6.47844	7.01801	7.25059	7.55726	7.2624	6.73907	6.97508
C11orf57	6.53701	7.15946	6.89825	7.3683	7.07489	6.82846	7.04013	7.08509	6.46563	7.10569	7.33537	7.12028	6.93239	6.9472	6.9292	7.37715	7.03728	7.31004
C11orf58	9.92215	9.66707	9.76934	9.59375	10.0931	9.77392	9.99049	9.718	9.91444	9.87173	10.0129	9.95192	10.0472	10.0913	10.3145	9.87342	9.46212	9.65741
C11orf63	6.36126	6.41536	6.54797	6.01283	7.11467	6.48838	6.68651	6.91031	7.0989	6.18786	6.40835	6.21864	6.27305	6.1802	6.55229	6.25471	6.03286	5.64338
C11orf68	5.30774	5.61487	5.0506	4.91347	4.77542	5.54917	5.16307	5.25473	5.7549	5.62429	5.0962	5.01562	5.49107	4.96607	5.08596	5.64467	5.35566	5.21857
C11orf71	5.44634	4.9937	5.52353	5.035	6.54465	5.9785	5.62972	6.14388	6.12427	4.98396	5.47096	5.25649	4.49652	4.56634	5.64089	4.86522	4.03719	4.20525
C11orf80	4.47905	3.81045	5.1584	4.15185	4.77542	4.10679	4.20279	3.74343	4.81846	4.31173	3.35389	4.29375	4.59886	4.07174	4.33838	4.25992	3.97426	4.1518
C11orf84	6.93252	6.29452	6.98866	6.85527	5.34271	6.45737	6.31045	6.68991	6.93967	6.211	6.66593	6.34572	6.42008	6.5307	6.29401	6.94919	7.06775	6.56896
C11orf95	5.20734	4.3846	3.92054	5.035	4.44179	4.84224	4.38561	4.77271	4.29438	4.61906	4.4123	5.01562	4.44249	3.88292	3.58354	5.18623	5.33075	4.96326
C11orf98	8.46136	8.29334	8.50095	8.26388	8.85416	8.51067	8.89157	8.80463	8.98485	8.27528	8.3309	8.2833	8.49957	8.21946	8.32533	8.05098	7.90675	7.99232
C12orf10	6.45181	6.53755	6.1898	6.52267	7.20958	6.36012	6.61508	6.79428	6.92274	6.67762	6.82697	6.18018	6.1935	6.19382	6.17838	5.86294	6.38708	6.23806
C12orf29	6.63689	6.57953	6.64383	6.31436	6.83399	6.37679	7.19513	6.87266	7.02148	6.72661	6.90677	6.25611	6.66387	7.12829	7.64303	7.10003	6.86584	6.83795
C12orf4	5.65131	6.09186	5.60201	4.68495	5.69736	5.48911	6.39818	5.86588	5.79267	4.98396	5.52975	5.61478	6.09186	6.4192	6.36304	5.92893	5.78037	5.84209
C12orf42	5.09943	4.64401	4.80733	5.25109	4.00704	4.39561	5.0044	5.25473	4.29438	4.61906	4.58857	5.18058	4.26708	4.7248	4.03417	4.32672	4.0975	3.6331
C12orf43	5.76163	5.93898	6.33472	6.1626	4.96146	5.79223	5.83228	6.42967	6.18234	5.47935	5.71849	6.12049	5.66629	5.9747	5.67232	5.07406	6.16555	5.77296
C12orf45	7.47627	7.15946	7.44764	7.17029	8.08963	7.56277	8.01396	7.7571	7.97543	7.81348	7.57754	7.59252	7.07238	7.49014	7.3972	7.0711	7.14835	7.24771
C12orf49	6.83495	6.81742	6.46641	6.52267	6.35836	6.5776	6.50083	6.14388	6.74148	6.6269	6.36057	6.18018	5.92458	5.67801	6.05267	5.86294	6.36272	6.38429
C12orf57	9.316	9.44801	9.44941	9.40935	10.6584	9.86387	9.71961	9.94356	9.81929	9.31894	9.33691	9.48211	9.39107	9.22866	9.38959	9.30795	9.10627	9.04735
C12orf60	0	3.73815	3.12336	2.43688	4.00704	4.02455	3.60824	3.74343	3.63918	3.38261	3.06682	3.67306	1.41113	3.20972	4.08175	3.19714	3.33779	3.17825
C12orf65	7.7505	7.82853	7.73565	8.06894	7.74134	8.07286	8.12097	8.04634	8.12357	8.11278	8.21028	8.17009	8.38965	8.62326	8.50843	8.43469	8.21647	8.1909
C12orf66	4.47905	3.49658	3.79253	4.0009	4.96146	3.84451	3.99339	3.90134	3.63918	3.80381	3.89103	4.21982	4.06736	3.20972	3.71006	4.18988	3.90845	3.46795
C12orf73	6.53701	6.44972	6.23974	7.09775	8.00748	7.29103	6.61508	7.01769	6.98931	6.40408	6.42393	6.71207	6.59124	6.81247	6.89631	6.78073	6.62077	6.57912
C12orf75	7.28016	7.51361	7.85261	7.82676	7.97543	7.70156	7.56095	7.82767	7.68538	7.58458	7.09374	7.41344	7.79251	8.09074	8.15504	7.51243	7.49512	7.38724
C12orf76	4.78798	5.34965	5.84725	4.95513	5.58855	5.63482	5.05925	4.50386	5.63526	5.36021	5.17198	5.293	5.26069	4.83317	5.15432	5.22177	5.38014	4.76391
C12orf77	3.83928	3.30966	3.79253	3.16132	2.7343	3.26183	3.74836	3.56609	1.28241	3.20959	4.13777	3.97219	2.93316	2.70069	3.29139	3.45776	3.00146	3.3777
C14orf1	6.13399	6.01745	6.35752	6.57705	6.70961	6.34326	6.16798	6.37686	6.12427	6.11612	6.17043	6.01517	6.14358	6.2073	6.02859	6.21999	6.04822	6.27603
C14orf119	8.02574	8.05001	7.93829	7.4652	8.69924	7.97772	8.4788	8.85859	8.71175	7.66219	7.78484	7.88333	7.97486	8.12668	8.18531	7.79789	7.33526	7.31004
C14orf132	2.93671	4.7942	4.43102	5.37904	4.87144	4.74286	4.6226	4.77271	4.81846	4.81301	5.0962	5.25649	3.99413	4.83317	4.33838	4.51035	5.11432	5.13838
C14orf159	3.83928	3.8793	3.3219	5.11069	3.62161	4.02455	3.60824	3.56609	4.18502	4.61906	4.21145	4.21982	3.74909	4.43491	4.52208	4.11626	4.0975	4.57376
C14orf166	9.06661	8.88516	9.1852	9.1672	9.8526	9.38849	9.2801	9.34794	9.52326	8.92666	9.27382	9.09191	8.97912	9.18672	8.86016	8.9902	8.81449	8.86214
C14orf169	4.47905	4.9937	3.3219	4.91347	4.56178	3.26183	3.74836	3.12858	2.75056	4.12943	3.69947	4.55653	4.20353	4.34013	3.71006	3.86977	4.31628	4.86703
C14orf2	9.62415	9.5947	9.79462	9.65349	10.8781	9.94994	9.99402	10.2063	10.1636	9.60755	9.83779	9.74349	9.34211	9.51155	9.54833	9.46447	9.29192	9.23897
C14orf28	0	2.14697	1.83648	1.86743	0	3.11058	1.16601	1.35002	0	2.5147	2.22947	0.985236	1.41113	2.84574	1.67701	1.49358	1.26401	2.51022
C14orf80	3.69843	4.64401	5.10551	3.83229	1.52846	4.4596	4.82609	4.29203	4.18502	3.01296	4.47348	4.29375	5.26069	4.93398	3.8812	4.18988	4.15538	4.35468
C14orf93	4.64177	4.1259	4.80733	4.35224	4.77542	4.69049	4.10189	4.59916	4.81846	4.22346	4.28155	3.87921	4.44249	4.76183	3.51586	2.21155	4.75114	4.2568
C15orf38-AP3S2	6.31376	6.18999	6.35752	6.1626	6.62949	5.81687	6.9267	5.86588	6.41809	5.65836	6.09456	6.25611	6.16041	5.99039	6.30407	6.14793	6.00164	6.14537
C15orf39	4.19434	4.33644	4.66835	5.14709	4.44179	4.18459	4.69366	4.50386	4.81846	4.22346	4.4123	3.87921	4.5486	5.3775	4.52208	4.95241	5.33075	5.60412
C15orf40	7.09587	6.95934	7.32576	7.04084	7.63592	7.06284	7.55141	7.14947	7.3348	7.00337	6.98239	6.99292	6.9615	6.70246	6.95498	6.89519	6.58962	6.63863
C15orf41	5.57278	4.56262	5.7472	4.63456	4.44179	4.79341	5.25992	4.40183	4.06668	4.68665	4.58857	4.77874	5.38047	5.35343	5.13189	4.32672	5.02399	5.31899
C15orf57	6.3377	6.48329	6.33472	6.01283	6.90378	6.86436	6.68651	6.45537	6.79829	6.16434	6.48463	6.84094	6.37752	6.50908	6.80001	6.18441	5.70485	6.03159
C15orf61	7.08177	7.11732	7.25466	7.25612	7.67636	7.20963	7.26679	7.2111	7.28266	7.27993	6.97182	7.20892	6.88254	7.45099	7.15732	6.68213	6.68113	6.97508
C15orf65	4.39025	4.33644	4.8721	4.07835	5.53091	5.14437	5.35068	4.77271	4.81846	4.81301	5.17198	4.87821	5.06002	4.79795	5.73319	4.25992	5.56235	5.26965
C16orf46	4.19434	4.06809	4.03811	2.65481	3.38183	3.11058	2.24237	2.4976	3.02896	3.20959	1.9135	1.9778	2.93316	4.0115	3.37016	3.77726	3.61034	1.88129
C16orf52	4.39025	4.64401	5.20942	4.47187	4.96146	4.10679	3.87608	2.84732	3.79618	4.68665	5.44064	4.21982	4.78404	4.48006	4.74536	4.95241	4.99257	4.76391
C16orf54	5.04229	4.8974	5.20942	5.40933	5.47086	5.10489	5.51667	4.68854	4.58009	4.75121	5.27867	5.55591	4.32795	4.68678	5.10911	4.56671	5.33075	5.26965
C16orf58	4.85588	5.30028	4.5935	4.63456	4.67255	4.10679	4.82609	4.85223	4.81846	4.81301	5.05676	4.36406	5.43683	4.43491	4.58947	3.77726	4.99257	4.96326
C16orf59	4.71673	5.32518	5.7472	5.75426	4.77542	5.57829	4.82609	5.42045	5.36136	5.40103	4.9745	5.25649	6.07421	6.06638	5.5592	6.09142	6.06342	5.97115
C16orf62	4.39025	5.44358	4.93408	4.52817	5.20206	4.69049	4.94738	4.85223	4.664	3.20959	4.06012	4.61537	4.73993	4.7248	5.10911	4.77241	5.30541	5.16561
C16orf70	4.29562	4.47635	4.80733	4.68495	4.96146	4.52088	4.54784	4.77271	3.46298	4.61906	5.27867	4.29375	4.64743	4.90115	4.45138	4.32672	4.46103	4.93189
C16orf72	5.83076	5.42066	4.93408	5.14709	4.00704	5.95649	4.20279	5.13263	5.25715	5.18432	5.17198	5.90155	5.84352	5.91018	5.67232	5.59133	5.8167	5.80794
C16orf74	5.79661	5.95502	6.98866	5.37904	5.12624	5.32701	6.70383	5.78713	6.09434	4.75121	4.47348	5.21904	5.29158	5.71625	5.71821	4.51035	4.92762	5.02403
C16orf86	0	1.90426	2.89306	2.43688	2.7343	2.75017	2.57909	1.35002	2.75056	1.74734	2.48852	2.56027	0	2.35779	2.10315	1.89677	2.5621	0.740719
C16orf87	6.86821	6.73623	6.95914	7.32129	7.28126	7.20963	6.78743	6.85346	6.83495	7.26895	7.40769	7.61433	7.9557	7.66163	8.1298	7.81544	7.26469	7.59177
C16orf91	6.90072	6.41536	6.0844	6.50874	7.11467	6.40957	6.94138	6.55381	7.3348	5.62429	6.73001	6.62883	6.25748	6.29835	6.52672	6.05248	6.23431	6.0896
C16orf95	6.07823	5.65469	5.25871	5.97283	5.40821	5.22022	5.51667	6.01157	5.5048	4.61906	5.24398	5.01562	5.40893	5.80764	5.39936	5.07406	5.11432	5.52223
C17orf49	6.63689	6.60008	6.48724	6.74083	6.42316	6.39327	7.34614	7.05178	6.93967	6.5382	6.48463	6.25611	6.9615	6.73076	6.77851	6.44714	6.69095	6.8037
C17orf51	2.66114	2.53619	1.19263	3.2971	3.09409	2.26863	3.08125	2.4976	0	3.20959	2.70806	1.9778	2.11066	3.40966	1.67701	3.04674	1.6334	3.55289
C17orf53	4.29562	4.18148	3.12336	4.63456	1.52846	3.63876	3.99339	3.56609	3.26223	4.02884	4.64284	4.21982	4.20353	4.64774	3.93401	3.67842	4.46103	4.86703
C17orf58	3.16799	4.06809	4.03811	4.22178	4.77542	3.52372	4.54784	4.77271	4.29438	3.92071	3.35389	1.56524	4.49652	3.74174	3.64819	4.25992	3.76708	4.1518
C17orf62	7.21701	7.20711	6.98866	7.04084	6.99187	6.8994	7.11971	7.49746	7.17237	7.15425	6.83864	6.98178	6.28844	6.3109	6.2426	6.35413	6.8484	6.41865
C17orf64	3.36727	2.35466	1.83648	2.18007	2.25386	2.26863	3.87608	2.84732	2.40527	2.18145	2.70806	0.985236	3.21681	3.31315	1.67701	2.68876	0.766223	2.12269
C17orf67	1.22115	2.14697	1.19263	0	0	2.5294	0	0	2.40527	1.12347	1.50833	1.56524	0.871627	1.61491	1.67701	0	0	1.88129
C17orf75	7.22986	6.96727	7.26676	6.75269	7.3158	7.23728	7.57042	7.35457	7.52633	6.80474	7.16965	7.01494	7.50684	7.50113	7.3494	7.32909	7.23144	6.87965
C17orf80	7.35246	6.82617	7.14098	6.53645	5.89308	6.44161	7.26679	6.52982	6.59952	6.46309	6.57115	6.77794	7.2242	7.05557	7.42052	7.03159	6.87449	6.84639
C17orf96	4.71673	4.52013	5.10551	4.82635	0	4.02455	3.87608	3.74343	4.664	4.54814	5.37802	4.29375	4.82685	4.76183	4.33838	4.18988	3.69084	4.69083
C17orf97	2.93671	3.81045	2.61888	3.64134	2.25386	2.9416	1.80233	3.36386	3.63918	1.74734	2.89856	2.56027	4.26708	2.5394	2.81629	2.87883	4.03719	3.46795
C18orf21	6.3377	6.99079	6.80179	6.74083	7.46177	6.44161	6.88176	7.18062	6.44206	6.38386	6.71742	6.67105	6.48833	6.73076	6.9677	6.57629	6.41104	6.64831
C18orf25	5.15439	5.19618	5.35249	4.91347	5.89308	5.95649	4.7614	4.17318	4.39604	4.87227	5.05676	5.67134	5.32182	5.02819	5.19816	5.18623	4.85959	5.11063
C18orf32	7.9266	7.68205	7.96823	7.83236	8.6527	8.10323	8.01396	8.05477	8.10117	7.8434	7.93378	7.68471	7.43948	7.64685	7.8042	7.72547	7.76985	7.63625
C18orf54	4.78798	5.30028	4.99352	5.3481	4.67255	5.54917	5.16307	5.19497	4.7433	5.13677	4.53217	5.39728	5.73533	5.75351	6.2001	5.32341	5.30541	6.04631
C18orf8	4.92073	5.80383	4.80733	5.28416	5.0462	5.32701	5.25992	5.61541	5.54962	5.44072	4.93154	4.14191	6.27305	5.85982	5.5592	5.69611	6.29994	5.50101
C19orf12	6.21379	5.82143	6.0568	5.439	5.53091	6.10394	6.28766	5.74607	5.93458	5.87667	5.34566	5.58564	5.86421	5.49214	4.91259	5.25645	5.35566	5.19233
C19orf18	0	2.6974	2.61888	0.912987	0	2.75017	0	1.35002	1.95043	1.12347	1.9135	0	2.36419	1.90711	1.06958	0	1.92723	1.88129
C19orf24	5.35543	6.35621	6.21498	6.10824	5.34271	5.0643	5.80043	5.56908	6.1536	5.51698	5.6406	5.82882	5.59378	5.95884	5.5592	5.92893	5.38014	4.96326
C19orf25	5.04229	4.86381	5.78133	5.46806	5.89308	5.14437	5.55535	6.20575	5.67626	4.61906	5.79238	5.18058	5.40893	5.46993	5.50786	5.25645	5.60452	5.36669
C19orf35	1.87289	0.753427	2.61888	0.912987	1.52846	0	2.85191	1.35002	2.40527	1.12347	1.50833	0.985236	2.36419	1.61491	0.631718	1.49358	1.26401	1.59121
C19orf38	4.5627	3.94501	4.2479	4.82635	4.00704	3.93734	4.7614	4.17318	4.95798	4.47356	4.88726	3.67306	2.93316	4.56634	4.03417	2.21155	3.43448	3.85002
C19orf43	9.32501	9.52926	9.43072	9.29233	9.74897	9.60026	9.58822	9.65564	9.77987	9.29748	9.50384	9.39453	9.46068	9.42617	9.21119	9.19627	9.15319	9.09061
C19orf44	3.36727	3.30966	3.65205	3.16132	0	3.39871	3.08125	3.56609	3.02896	3.6766	3.79843	2.97406	3.08194	4.18515	3.44485	4.03868	2.86934	3.85002
C19orf47	6.02023	6.40372	6.02867	6.10824	5.93812	5.81687	6.16798	6.23571	5.86537	6.23377	6.46969	5.75222	6.75535	6.3109	6.07636	6.27177	6.42287	6.01672
C19orf48	7.19096	7.01394	7.16703	7.41384	7.33277	7.816	7.58918	7.74674	7.73472	7.29083	7.45396	7.2279	7.7871	7.76101	7.68985	7.70678	7.96456	8.1369
C19orf53	9.69538	9.58572	9.66581	9.42796	9.98192	9.6405	10.0254	10.0549	10.0257	9.26744	9.39736	9.43797	9.5124	9.40291	9.39195	9.00302	8.98381	8.98185
C19orf54	5.44634	5.7497	4.93408	5.57881	4.77542	5.45811	5.55535	5.47172	5.02298	5.69165	5.55827	5.75222	5.13006	6.16645	5.28204	5.92893	6.29994	6.06089
C19orf57	4.78798	4.28661	4.43102	4.07835	2.25386	4.52088	3.99339	3.90134	4.58009	4.22346	3.89103	4.36406	4.06736	4.96607	4.91259	4.67322	5.25335	4.93189
C19orf60	5.99033	5.55299	5.87912	5.93168	5.69736	6.20074	6.19272	5.9765	6.18234	5.44072	5.61368	5.80374	5.54334	5.55679	5.67232	5.29032	5.35566	5.73711
C19orf66	4.19434	4.33644	4.5935	4.28849	4.44179	3.84451	4.6226	3.90134	3.79618	4.81301	3.59321	3.43247	4.13705	4.2903	3.82638	4.39056	4.67403	4.65285
C19orf68	3.16799	3.30966	2.61888	3.83229	2.25386	4.39561	3.45303	2.84732	3.63918	4.47356	4.06012	3.43247	2.93316	2.35779	2.69913	3.19714	4.21103	4.49008
C19orf70	7.26775	7.51901	7.4045	7.23936	8.39443	7.65449	7.99298	8.12049	7.81032	7.13017	7.40769	7.40512	7.16705	7.0024	6.99902	6.78073	6.77644	6.69578
C19orf81	0	0	0	0	0	0	0	0	0	0	0	0	0	0	0	0	0	0
C1D	6.63689	6.07728	5.7472	5.88933	6.35836	6.18189	6.55908	6.92877	6.36893	6.27827	6.27723	6.29262	6.5407	6.47602	7.0236	6.09142	6.03286	5.80794
C1GALT1	6.7303	6.2562	6.44528	6.7877	6.2905	6.10394	6.00987	5.9765	6.36893	6.04064	5.88536	6.34572	6.1935	6.39582	6.22151	6.93855	6.35038	6.4522
C1GALT1C1	5.53185	4.8974	5.35249	4.82635	6.76066	5.29229	4.94738	5.70382	6.12427	4.31173	4.93154	5.18058	3.83548	5.08775	4.65386	5.07406	4.26462	3.9784
C1orf109	5.79661	5.46613	5.60201	5.5245	5.34271	5.45811	5.43606	5.31211	5.25715	5.18432	5.58624	5.90155	5.66629	5.84264	5.49034	5.38739	5.58359	5.73711
C1orf112	6.59776	6.29452	5.91029	5.77767	6.51522	6.40957	6.81956	6.834	6.72204	6.59208	6.52854	6.05822	6.87236	7.07041	7.10646	6.33803	6.1371	6.06089
C1orf122	7.61989	7.46404	7.43698	7.54239	7.63592	7.50328	8.11451	8.15226	8.13832	6.96305	7.66538	7.44622	7.56489	7.45099	7.12361	7.14699	7.59785	7.43837
C1orf123	7.9423	7.7012	7.83647	7.68539	8.45767	8.07286	8.06176	8.36378	8.41752	7.68715	7.70418	7.70517	7.92647	7.81927	7.81127	7.61622	7.36623	7.61665
C1orf131	7.51878	6.95934	7.45823	7.4652	6.99187	6.94482	7.14529	7.38162	7.52633	7.23548	6.66593	6.99292	7.50025	7.58619	7.44802	7.10954	7.32269	7.50384
C1orf132	1.22115	0	1.19263	2.43688	2.25386	2.9416	1.80233	1.35002	1.28241	2.18145	2.70806	3.14357	0.871627	0.755007	1.06958	2.87883	2.17122	2.67086
C1orf159	1.87289	3.20625	2.61888	3.2971	2.7343	2.26863	4.20279	2.84732	3.46298	1.12347	2.89856	3.43247	3.21681	3.09829	2.5716	1.49358	2.17122	2.32943
C1orf162	5.04229	5.05451	5.1584	4.78074	6.0242	5.02254	5.51667	5.90371	5.41078	5.03672	5.24398	4.82933	4.9864	4.3883	5.06243	4.56671	4.46103	4.65285
C1orf174	7.06752	7.01394	7.15407	7.37599	7.96458	7.457	7.11971	7.43426	7.86453	6.96305	6.89564	7.34554	6.98058	7.21096	7.35909	6.64334	7.13403	7.14885
C1orf194	4.08542	3.58167	3.3219	3.64134	3.82716	4.52088	4.10189	4.68854	3.79618	3.38261	3.89103	3.43247	3.08194	3.66561	3.71006	3.19714	3.00146	2.81539
C1orf198	3.16799	3.40614	1.19263	4.07835	2.7343	3.11058	1.80233	2.4976	3.02896	4.22346	1.9135	3.14357	2.36419	3.20972	2.81629	4.18988	3.8395	3.28142
C1orf216	2.93671	2.8424	1.19263	2.8441	0	1.54069	1.16601	3.12858	2.75056	4.02884	2.70806	3.14357	3.74909	3.66561	3.71006	3.67842	3.12249	4.03854
C1orf220	2.32019	0.753427	1.19263	0.912987	3.38183	0.96692	3.60824	2.84732	0	1.12347	0	0.985236	1.80289	1.61491	1.06958	0	1.6334	2.32943
C1orf228	2.93671	2.53619	1.83648	2.18007	2.25386	0.96692	1.16601	3.56609	0	1.74734	0.942911	0.985236	2.36419	0.755007	2.5716	2.4698	2.72388	2.12269
C1orf27	5.83076	6.10629	6.16416	6.24888	5.40821	5.81687	6.66898	6.01157	6.03254	6.34254	6.67898	5.25649	6.31875	6.39582	6.96136	6.63018	6.39911	6.06089
C1orf35	6.40724	6.23008	6.0568	6.49469	5.93812	6.30893	5.98175	6.11192	6.46563	6.46309	6.59887	6.57054	6.5016	6.50908	6.79288	6.80436	7.05259	6.75075
C1orf43	8.82967	8.88934	8.84142	8.32076	9.39228	8.67132	9.01117	8.81955	8.96845	8.40134	8.53482	8.54405	8.44566	8.61316	8.81512	8.38069	8.50231	8.35363
C1orf50	4.78798	5.24917	4.73951	5.3481	5.93812	4.79341	6.21705	6.20575	6.2919	5.18432	5.69299	5.10046	5.92458	5.19996	5.60877	5.64467	5.38014	4.86703
C1orf52	6.86821	6.70811	6.56766	6.87711	7.26367	6.67517	6.83537	7.11764	7.0373	7.05544	6.62607	7.16035	7.08125	7.07041	7.26431	7.10003	7.014	6.52759
C1orf53	4.39025	5.08398	4.34236	4.99562	5.2741	5.18279	5.21231	5.86588	5.02298	4.75121	4.84157	4.21982	4.64743	4.12956	5.03851	5.1498	4.46103	4.72783
C1orf54	4.29562	4.00786	3.79253	4.58234	6.32483	5.39405	4.82609	4.92761	4.88991	4.98396	5.40967	4.97126	4.69442	5.51402	5.38046	5.35575	5.38014	5.50101
C1orf56	4.98279	4.7942	5.0506	5.14709	5.98181	5.14437	4.82609	4.77271	5.08518	5.69165	4.13777	5.46284	5.35145	4.64774	4.03417	5.18623	5.79865	5.36669
C1orf74	2.66114	4.00786	3.65205	3.83229	4.96146	3.84451	4.20279	2.84732	4.81846	3.01296	3.21748	4.05954	4.49652	4.12956	3.58354	4.03868	3.00146	3.91563
C1QBP	8.70634	9.00362	8.72351	8.57238	9.2206	8.32558	8.39065	8.59522	8.68187	8.27528	8.06876	7.95912	7.87641	8.09437	8.53217	7.82702	8.04715	8.0628
C1QL1	2.32019	0	1.19263	0.912987	2.7343	1.95009	1.80233	0	1.95043	1.12347	1.50833	1.9778	1.41113	1.90711	1.06958	1.49358	1.6334	2.12269
C1QTNF3	3.96759	3.30966	3.65205	1.86743	2.25386	2.5294	4.10189	3.90134	3.26223	1.74734	2.22947	3.29524	3.34013	2.14998	2.92465	2.21155	2.72388	3.55289
C1QTNF3-AMACR	4.85588	5.30028	4.8721	4.87057	5.84658	5.54917	5.394	4.92761	4.06668	4.81301	3.79843	5.10046	4.78404	5.30407	4.65386	5.18623	4.89401	5.13838
C1RL	1.22115	0	2.61888	2.18007	0	1.95009	2.85191	3.12858	1.28241	2.5147	2.89856	2.56027	1.80289	2.14998	0	2.68876	2.37986	1.22775
C1RL-AS1	1.22115	2.14697	0	0.912987	2.7343	1.54069	0	0	0	2.18145	0	0.985236	0.871627	0	0.631718	0	1.26401	0
C20orf196	6.88456	6.38016	6.91371	6.79919	7.46177	6.98886	6.39818	7.10145	6.59952	6.211	6.09456	6.75195	6.8621	6.76765	7.07741	6.05248	6.42287	6.485
C20orf24	8.0693	7.92532	7.76152	7.87096	8.91739	8.29522	8.02778	8.16788	8.26465	7.63678	7.60514	7.75836	8.18276	8.31289	8.43932	8.09954	8.11436	8.1196
C20orf27	5.86411	6.66976	6.80179	6.7877	6.97035	6.99966	6.91187	7.00034	6.9056	7.11798	6.93966	7.058	6.34843	6.06638	6.55229	6.11051	6.73907	6.37266
C20orf96	3.83928	4.06809	2.89306	4.0009	4.00704	3.7453	3.27908	4.40183	3.93776	3.80381	3.69947	3.77981	3.6572	3.74174	4.08175	4.4517	3.69084	3.17825
C21orf2	4.39025	3.58167	4.80733	4.91347	4.87144	4.02455	4.20279	4.92761	4.88991	4.31173	4.4123	3.77981	3.34013	3.31315	3.71006	3.67842	4.63387	4.1518
C21orf33	5.76163	5.95502	5.10551	5.55191	6.45451	5.60683	6.39818	5.94056	5.3102	5.65836	5.74354	5.90155	5.54334	5.32896	5.17641	5.22177	5.17155	5.02403
C21orf58	5.9286	5.63492	5.10551	5.21725	6.10543	5.86492	6.03745	5.94056	4.88991	6.14043	5.74354	5.67134	6.12654	6.24703	5.90175	6.38581	6.09335	6.23806
C21orf59	8.1185	8.08687	8.29196	8.1519	7.63592	8.10323	8.16541	8.19864	8.23751	8.40636	8.28043	8.35411	8.44222	7.8668	8.01498	7.9956	7.94828	7.9847
C21orf91	6.78357	6.30707	6.31156	6.74083	7.15339	6.68859	6.26451	6.0458	6.26528	6.27827	6.62607	6.57054	6.44777	6.6736	6.90955	6.50597	6.17957	6.56896
C22orf29	4.85588	5.65469	5.71225	5.21725	3.38183	5.57829	5.21231	5.31211	5.14481	5.65836	5.99375	5.43043	4.78404	5.2267	4.83139	4.86522	5.25335	5.87546
C22orf34	1.22115	0	0	0	0	0	0	0	0	0	0	0	0.871627	0	0	0	0	2.12269
C22orf39	7.13739	7.21379	7.4045	7.57616	7.98619	7.59161	7.50277	7.24096	7.06843	7.53959	7.73574	7.69838	7.25588	7.34514	7.21181	7.5618	7.44378	7.2155
C22orf46	4.47905	3.81045	4.34236	4.0009	3.09409	4.02455	3.87608	3.36386	3.46298	4.12943	4.21145	3.87921	3.6572	4.2903	3.93401	3.86977	3.90845	4.65285
C2CD2	2.66114	3.66203	1.83648	1.86743	2.25386	0	2.85191	2.03503	2.75056	3.01296	2.70806	3.43247	1.80289	0.755007	1.40503	2.68876	2.37986	1.88129
C2CD2L	4.85588	4.3846	4.8721	4.52817	2.7343	4.39561	4.54784	3.56609	3.93776	4.54814	4.53217	3.97219	4.86842	5.19996	4.33838	5.32341	5.11432	5.29453
C2CD3	4.39025	4.7581	5.1584	4.4133	3.38183	4.39561	4.29709	3.56609	4.81846	4.98396	4.34841	4.67191	5.43683	5.30407	4.85897	5.86294	5.66555	5.29453
C2CD5	5.89672	6.16263	6.42384	5.60522	4.44179	5.2567	5.76787	5.70382	6.18234	5.81759	5.83962	5.75222	6.42008	6.09569	6.29401	6.30528	6.32538	5.79056
C2orf15	1.87289	1.90426	3.65205	1.46774	0	3.7453	2.85191	3.36386	1.95043	2.18145	3.21748	2.56027	2.76725	1.61491	2.4317	3.19714	2.17122	2.81539
C2orf27A	2.66114	0	1.19263	2.65481	1.52846	1.54069	2.57909	2.03503	1.95043	0	0.942911	2.56027	1.41113	2.14998	2.27675	0	1.26401	1.22775
C2orf42	3.54233	5.02443	4.66835	4.4133	4.31091	4.88947	3.27908	3.56609	5.02298	3.53708	3.35389	4.55653	3.21681	4.43491	3.64819	4.03868	4.0975	4.1518
C2orf48	4.64177	4.18148	3.65205	3.91906	3.38183	3.93734	4.29709	3.56609	4.88991	3.92071	3.35389	2.78195	4.73993	4.7248	4.83139	4.39056	4.46103	4.09628
C2orf49	6.59776	6.35621	5.71225	5.49656	6.06539	5.79223	6.09109	6.48061	6.26528	6.27827	6.03492	5.58564	6.61586	6.82127	6.63436	6.4168	6.03286	5.43541
C2orf68	6.51618	6.79977	5.94081	6.95104	7.20958	6.94482	6.53992	6.17514	6.44206	6.51979	6.73001	6.55559	6.48833	6.08111	5.32222	6.6169	6.00164	6.10375
C2orf69	5.4016	4.9937	6.26408	5.86768	5.98181	5.95649	5.21231	5.13263	5.36136	6.18786	6.2425	5.90155	5.35145	5.14494	5.62492	5.5639	5.62515	5.19233
C2orf74	5.20734	5.46613	5.30636	4.73364	4.00704	4.9352	5.30601	5.74607	4.58009	5.98802	5.6406	5.49453	6.0199	5.82525	6.08805	5.95027	5.90372	5.90806
C2orf76	4.29562	5.05451	5.84725	4.87057	6.54465	5.93413	5.05925	6.01157	5.41078	4.47356	4.84157	4.61537	5.40893	5.59834	5.01419	4.56671	4.82434	5.79056
C2orf81	3.69843	2.97415	2.61888	3.4212	1.52846	3.84451	2.57909	2.03503	2.40527	3.80381	2.89856	0.985236	3.6572	2.70069	2.92465	2.4698	3.23415	2.94675
C2orf88	0	1.61229	3.3219	2.8441	0	1.95009	2.24237	2.4976	0	2.18145	1.9135	1.9778	1.41113	1.2481	3.20807	2.4698	0	2.51022
C3orf33	3.54233	2.14697	3.65205	2.65481	4.16696	3.63876	2.85191	2.84732	3.02896	3.53708	3.79843	1.56524	3.91699	3.40966	4.41469	2.4698	2.86934	3.28142
C3orf38	6.65606	6.54816	6.44528	7.06006	7.7157	6.75385	6.61508	7.01769	6.64153	6.78945	6.31114	6.34572	6.67563	6.83001	7.23304	6.60349	6.27405	6.40729
C3orf52	6.38443	5.05451	5.7472	5.46806	6.60176	6.20074	5.55535	5.13263	5.25715	5.18432	5.27867	4.61537	5.06002	5.42445	5.4726	5.29032	5.25335	5.71885
C3orf58	6.67498	6.60008	5.81467	7.13447	7.39871	7.06284	6.1428	6.07924	6.31804	6.87886	6.75487	7.20892	6.5407	6.22067	6.39164	6.92783	7.16254	6.896
C3orf62	3.16799	3.20625	3.79253	4.4133	0	3.52372	3.87608	3.90134	3.26223	4.47356	3.21748	3.97219	4.38636	4.23868	4.17246	3.33332	3.76708	5.08234
C3orf67	4.85588	5.08398	4.51454	4.4133	3.09409	4.69049	4.38561	5.25473	4.39604	4.87227	5.34566	5.05866	5.54334	4.43491	4.80328	4.81956	4.41437	4.79911
C4orf22	3.36727	3.30966	3.3219	0.912987	5.89308	2.75017	3.08125	4.59916	3.93776	3.38261	3.97805	2.29823	4.20353	1.90711	3.8812	3.67842	3.00146	3.46795
C4orf3	8.77372	8.51778	8.89306	9.05193	9.87594	9.23467	8.84939	9.29199	9.03693	8.81027	9.15746	8.95052	8.56425	8.48335	8.41862	8.56145	8.42205	8.30243
C4orf32	6.18768	6.03264	5.94081	6.24888	6.60176	6.00018	6.21705	6.17514	6.1536	6.211	6.20691	5.94808	6.36305	6.32335	6.33386	6.49149	6.27405	6.41865
C4orf33	5.61258	5.05451	4.93408	4.52817	5.40821	4.84224	5.47693	6.07924	5.36136	4.75121	4.84157	3.97219	6.05633	6.13856	6.33386	5.38739	5.08483	5.64338
C4orf46	7.12369	7.29793	7.20524	7.04084	7.82766	7.36809	7.08047	6.947	6.83495	6.72661	7.2679	6.85322	7.24013	7.49565	7.09491	7.40833	7.20427	7.41587
C4orf48	5.76163	6.01745	5.1584	5.75426	5.93812	5.8411	5.43606	5.82704	5.82948	5.31821	5.05676	5.14108	5.35145	4.90115	5.41802	4.67322	5.17155	5.08234
C5	3.16799	2.6974	2.89306	3.83229	0	2.5294	3.08125	2.03503	3.02896	3.01296	1.50833	3.55778	3.08194	3.40966	4.29865	1.89677	1.26401	3.85002
C5orf15	7.03859	7.27256	7.4045	6.95104	8.01801	7.49567	7.2314	7.05178	7.14343	6.81988	7.04419	7.1304	6.6036	7.04058	7.17388	6.97024	7.014	6.75075
C5orf22	5.4016	5.61487	5.71225	5.86768	5.58855	5.42644	5.21231	4.68854	4.81846	4.81301	5.76817	5.94808	5.59378	5.69726	5.06243	5.64467	4.31628	5.66262
C5orf24	6.31376	5.39738	5.35249	5.82337	6.2193	6.21934	5.89394	5.61541	5.7549	6.25619	6.4546	6.03686	6.00133	6.27292	6.23209	6.09142	5.85214	5.82512
C5orf30	4.47905	5.76797	4.99352	5.21725	4.77542	5.02254	5.05925	4.68854	4.81846	5.47935	5.40967	5.3286	4.9864	5.44737	5.24071	5.18623	5.25335	5.08234
C5orf34	5.61258	5.11286	5.5633	5.3481	6.25534	5.39405	5.59301	5.47172	5.36136	5.75599	5.34566	4.61537	6.12654	6.1802	6.34365	5.29032	5.49669	5.73711
C5orf42	3.83928	4.7942	4.43102	4.91347	3.38183	4.74286	5.05925	4.99923	4.39604	5.5894	5.05676	5.46284	5.38047	5.02819	5.13189	5.41835	5.22659	5.13838
C5orf51	6.31376	6.36823	6.16416	6.43705	6.85763	6.75385	5.98175	5.61541	5.93458	6.774	6.42393	6.58534	6.05633	6.37207	6.38217	6.63018	6.42287	6.8037
C5orf56	6.04952	6.28186	6.1898	6.08966	6.70961	6.53368	6.35498	6.32205	6.46563	5.93342	6.2425	6.25611	5.13006	5.82525	5.45463	5.41835	5.45119	5.29453
C5orf63	4.47905	4.68305	4.43102	4.87057	5.0462	4.9352	5.25992	5.06747	4.88991	4.47356	4.88726	5.293	4.20353	4.7248	4.74536	4.03868	4.67403	4.20525
C6orf1	3.96759	4.3846	4.8721	5.21725	5.0462	4.97953	4.7614	4.59916	5.08518	3.80381	4.47348	4.43111	4.5486	4.34013	3.76939	5.29032	4.7131	4.69083
C6orf106	6.02023	5.87299	5.6397	6.07083	6.2193	6.02153	6.26451	5.56908	6.06377	6.30001	6.20691	6.14066	6.03823	5.59834	5.74801	6.23745	6.17957	6.06089
C6orf120	4.98279	5.22292	5.67643	5.1826	5.58855	5.45811	5.35068	4.77271	5.3102	5.36021	5.05676	5.52555	5.09546	4.99746	4.48716	4.39056	3.76708	4.40124
C6orf136	3.36727	4.52013	4.66835	4.73364	3.82716	4.52088	3.99339	4.59916	4.29438	4.54814	4.06012	4.82933	4.59886	4.60761	4.88603	5.69611	5.96973	4.89982
C6orf203	4.5627	5.44358	6.1898	5.5245	5.2741	5.51945	5.70045	5.61541	6.03254	5.51698	5.69299	5.94808	5.66629	5.71625	5.74801	6.28862	5.83453	5.52223
C6orf226	5.76163	5.48834	5.81467	6.21498	6.2905	6.75385	6.50083	5.9765	6.21052	5.93342	6.31114	6.31054	6.10931	5.735	5.77721	5.79379	5.02399	5.60412
C6orf47	3.69843	4.1259	4.34236	4.35224	3.09409	3.39871	4.29709	4.40183	4.7433	3.38261	3.97805	3.97219	3.21681	4.0115	4.12782	4.56671	5.05473	4.89982
C6orf48	9.48634	9.50903	9.41993	9.16053	9.91025	9.42701	9.71748	9.54031	9.77516	9.09159	9.29304	9.0093	10.0918	10.2439	10.2849	9.59384	9.90012	9.72874
C6orf52	1.87289	2.35466	1.83648	0	3.09409	2.9416	3.27908	4.17318	3.93776	1.74734	3.21748	2.29823	2.76725	1.90711	2.5716	1.89677	1.6334	2.12269
C6orf62	7.88658	7.62806	7.41541	7.79843	7.56589	7.66809	7.47277	7.72577	7.46916	7.73583	7.8147	7.93044	7.94602	7.52287	7.90354	7.86685	7.94418	8.17089
C6orf89	5.95979	6.00209	6.0844	5.31649	5.89308	5.66228	5.89394	6.20575	6.09434	6.04064	5.47096	6.05822	6.07421	5.735	5.81993	5.44866	6.06342	5.58408
C6orf99	2.66114	2.53619	2.28008	3.4212	2.25386	1.54069	1.80233	2.03503	3.46298	1.12347	1.9135	0.985236	3.21681	1.61491	2.10315	2.21155	1.26401	2.51022
C7orf13	5.35543	4.00786	4.93408	4.91347	5.47086	4.79341	4.88801	5.66029	4.88991	4.12943	5.37802	4.21982	4.64743	4.76183	4.2578	4.90947	4.78821	4.03854
C7orf25	4.71673	4.28661	4.73951	4.73364	4.67255	4.52088	3.60824	4.04365	5.41078	3.92071	4.34841	4.36406	4.38636	4.12956	4.2578	4.32672	5.05473	3.70909
C7orf26	5.83076	6.28186	5.44054	5.86768	4.96146	5.36092	6.21705	6.17514	6.34371	5.87667	5.6406	5.18058	6.0199	6.1802	6.08805	6.14793	5.85214	5.66262
C7orf31	3.16799	4.23501	4.03811	4.4133	3.38183	3.26183	3.60824	3.90134	3.93776	3.38261	3.47851	3.43247	4.38636	3.66561	4.08175	4.4517	3.43448	3.91563
C7orf43	1.22115	3.20625	3.4964	3.2971	0	1.95009	3.08125	0	0	3.53708	2.22947	3.97219	3.45374	3.66561	3.37016	3.19714	4.59256	3.6331
C7orf49	6.7303	6.73623	6.83467	7.04084	6.99187	7.24638	6.65123	6.91031	7.00549	6.71047	7.25924	6.86539	6.98058	6.63419	7.0236	6.79259	7.09758	6.78626
C7orf50	8.26306	8.18532	8.34427	7.97081	8.53301	8.09317	8.34722	8.60098	8.32389	7.99774	7.72949	7.76487	7.75421	7.42813	7.50586	7.51959	7.68886	7.39301
C7orf55-LUC7L2	8.23145	8.17166	8.42743	8.06894	7.67636	7.97772	8.14653	8.088	8.0553	8.52189	8.35549	8.26962	8.5831	8.50536	8.42325	8.32867	8.24341	8.37712
C7orf57	1.87289	2.35466	2.61888	2.8441	1.52846	3.39871	1.16601	0	2.75056	3.80381	2.70806	1.56524	3.55906	2.84574	3.20807	3.67842	2.72388	1.59121
C7orf72	1.22115	0	0	0	0	0	2.57909	2.03503	1.95043	0	0.942911	2.29823	2.11066	3.31315	3.20807	1.49358	2.17122	2.12269
C7orf73	8.96265	8.68095	8.73226	9.03988	9.78332	9.47619	8.80995	8.93364	8.8747	8.76408	9.12446	9.02022	8.47959	8.75309	8.65916	8.74666	8.74549	8.62283
C8orf33	7.53958	7.67723	8.14244	7.78116	8.36174	7.8221	8.24446	8.11243	8.0318	7.86544	7.97138	7.91881	7.91164	7.86254	8.06616	7.68785	7.45534	7.47692
C8orf37	3.83928	3.09486	4.2479	3.16132	2.7343	0.96692	1.16601	3.56609	2.75056	1.74734	2.22947	2.56027	3.6572	3.09829	3.58354	2.68876	2.17122	2.67086
C8orf44	2.66114	3.49658	3.79253	3.83229	3.09409	3.26183	3.87608	2.84732	2.40527	2.18145	3.69947	2.78195	2.76725	2.5394	3.29139	3.86977	3.61034	3.06714
C8orf44-SGK3	4.85588	4.64401	4.8721	4.68495	5.0462	4.9352	4.7614	4.99923	4.29438	4.54814	4.84157	5.52555	4.9864	4.07174	4.65386	4.86522	4.75114	4.69083
C8orf58	2.32019	2.35466	2.61888	3.01141	2.25386	3.26183	1.16601	0	2.75056	1.74734	2.89856	1.9778	2.36419	3.58523	0	0.932009	1.92723	2.94675
C8orf59	9.00439	9.06587	9.29558	9.16498	9.89891	9.421	9.48432	9.67217	9.61572	9.11631	9.16443	9.04184	8.84498	8.99199	9.22847	8.78577	8.72652	8.73158
C8orf76	5.09943	5.22292	5.39719	4.63456	6.25534	5.32701	5.83228	5.70382	6.12427	5.65836	4.74563	5.05866	5.66629	5.59834	5.86142	5.61825	5.54079	5.29453
C8orf82	5.09943	4.93022	4.80733	4.68495	3.62161	3.84451	3.99339	4.04365	4.88991	4.02884	4.69515	3.77981	3.6572	4.96607	3.64819	4.11626	3.8395	4.1518
C8orf88	5.72579	5.83882	6.0568	6.23203	7.5369	6.47296	6.28766	6.26507	6.68234	6.211	6.2425	6.67105	6.1935	6.39582	6.27366	6.25471	5.74311	6.10375
C9	0	0	0	0.912987	1.52846	0	0	0	0	0	1.9135	1.56524	0	0	0	1.89677	2.86934	0
C9orf116	2.32019	3.09486	2.61888	3.4212	3.09409	3.26183	1.80233	1.35002	1.95043	3.01296	0	0	2.57975	1.2481	0	2.68876	2.17122	3.06714
C9orf142	5.35543	5.39738	5.30636	5.11069	5.40821	5.60683	5.59301	5.86588	5.7549	4.54814	5.50065	5.14108	5.26069	4.96607	5.39936	5.22177	5.33075	5.02403
C9orf16	7.65843	7.68205	7.6366	7.89791	8.2411	8.36789	7.64404	7.95021	7.85564	8.03711	7.96607	7.92464	7.7871	7.54429	7.5275	7.80376	7.66415	7.69349
C9orf24	4.39025	4.28661	3.79253	4.22178	5.53091	4.32864	4.20279	4.99923	4.29438	3.92071	4.06012	4.21982	4.59886	3.88292	3.93401	4.11626	3.8395	4.49008
C9orf3	5.04229	4.82943	5.1584	5.55191	5.40821	4.88947	5.47693	5.70382	5.71611	4.68665	4.28155	4.61537	5.61836	5.3775	5.30227	4.77241	5.02399	4.86703
C9orf40	6.4297	6.09186	6.28801	5.40933	6.25534	5.2567	6.73785	5.74607	6.59952	6.06624	5.81619	5.80374	6.78821	6.62417	6.74934	5.53595	6.27405	6.39584
C9orf64	5.30774	5.37371	5.78133	6.10824	5.53091	5.9785	5.76787	6.0458	5.08518	5.44072	5.47096	6.21864	5.54334	5.69726	6.28387	5.9713	5.96973	6.28847
C9orf69	4.39025	4.23501	4.93408	4.87057	3.82716	4.4596	5.1121	4.59916	4.29438	3.92071	4.13777	4.55653	4.20353	5.02819	3.93401	4.18988	4.63387	4.99396
C9orf72	2.66114	2.6974	3.65205	3.4212	5.20206	3.93734	3.08125	3.56609	3.46298	3.6766	3.89103	3.43247	3.6572	3.81405	4.48716	3.45776	2.86934	3.70909
C9orf78	7.45454	7.88403	7.79531	7.76368	6.68339	7.78511	7.57042	8.06315	7.48078	8.14317	8.08355	7.93622	7.75421	7.70981	7.57815	7.83851	7.69375	7.75752
C9orf85	6.26464	6.20347	5.84725	6.28199	6.42316	6.00018	6.61508	6.17514	6.36893	6.36335	6.4546	6.12049	6.95186	6.552	7.26945	6.58995	6.01734	6.46322
CA11	2.93671	3.49658	3.65205	2.8441	3.38183	4.02455	3.27908	3.56609	3.26223	4.54814	4.21145	4.61537	3.34013	3.09829	3.8812	4.72367	3.23415	3.55289
CA2	5.15439	4.06809	4.80733	5.1826	6.14439	6.1628	4.54784	4.99923	5.25715	5.65836	5.17198	5.52555	5.80121	5.67801	6.42892	6.57629	6.26092	6.69578
CA5B	1.87289	2.8424	3.79253	2.18007	0	0.96692	1.80233	0	0	2.78523	1.50833	0.985236	2.93316	2.35779	1.67701	2.4698	3.23415	3.17825
CA5BP1	2.66114	1.61229	1.83648	3.16132	2.7343	1.54069	2.85191	3.36386	2.40527	2.18145	3.35389	3.43247	2.57975	3.09829	1.06958	4.11626	3.23415	2.67086
CA8	1.22115	0	0	1.46774	0	0	2.57909	2.03503	0	2.18145	0.942911	0.985236	0.871627	0.755007	2.4317	2.4698	0.766223	0
CAAP1	6.02023	5.78601	6.16416	6.66754	5.84658	6.67517	5.43606	6.07924	5.63526	6.42402	6.37667	6.47844	5.59378	6.33568	6.13392	6.01246	5.90372	6.0896
CAB39	6.21379	6.74548	6.68046	7.28091	6.0242	6.75385	6.09109	6.52982	6.36893	6.86434	6.40835	6.71207	6.799	6.73076	6.92268	6.95975	7.08274	7.41019
CAB39L	2.66114	1.61229	4.34236	2.65481	2.25386	1.95009	2.24237	2.03503	4.06668	3.80381	3.06682	3.29524	1.80289	2.14998	1.90575	3.19714	3.52509	3.3777
CABIN1	3.96759	4.00786	2.89306	4.35224	3.09409	3.84451	4.54784	5.19497	5.14481	5.03672	3.89103	4.43111	3.91699	4.23868	3.11964	3.86977	4.36616	4.2568
CABLES1	0	2.8424	1.19263	3.01141	2.7343	3.39871	3.60824	3.36386	3.02896	3.01296	3.89103	0.985236	2.36419	2.35779	0	3.19714	3.00146	3.6331
CABLES2	6.13399	6.2562	5.87912	6.18027	5.0462	5.88836	6.11718	6.45537	6.2919	6.30001	6.15183	6.03686	6.62801	5.6585	5.87499	6.44714	6.85715	6.58921
CABYR	0	0	0	0.912987	0	2.9416	0	0	1.28241	0	0.942911	0	2.36419	2.14998	1.40503	0.932009	0	1.22775
CACFD1	1.22115	1.24585	3.12336	0.912987	1.52846	1.95009	0	2.03503	1.95043	2.18145	1.50833	0.985236	1.80289	1.2481	1.06958	0	0.766223	1.22775
CACNA1A	4.08542	4.86381	4.80733	4.68495	5.12624	5.14437	4.88801	4.59916	4.664	4.68665	5.58624	4.82933	4.06736	4.64774	3.82638	4.72367	4.21103	4.69083
CACNA2D4	2.93671	2.14697	2.61888	3.16132	0	1.95009	3.27908	3.12858	4.18502	1.74734	1.9135	3.67306	2.57975	3.31315	2.92465	2.21155	3.52509	3.06714
CACNB1	0	1.24585	2.28008	2.65481	1.52846	0.96692	0	0	2.40527	3.6766	2.89856	2.78195	3.74909	2.70069	2.27675	2.68876	3.00146	2.51022
CACNB2	1.22115	2.14697	1.19263	2.43688	1.52846	3.11058	2.85191	2.4976	3.02896	1.12347	2.48852	3.43247	1.80289	2.35779	2.27675	2.4698	2.72388	2.12269
CACNB3	4.29562	2.6974	3.3219	2.43688	2.25386	3.11058	2.57909	3.36386	3.02896	3.38261	3.69947	2.78195	3.91699	4.07174	2.5716	4.03868	3.33779	3.78127
CACTIN	3.54233	4.33644	4.2479	3.4212	2.25386	3.52372	3.74836	3.56609	3.26223	3.80381	4.13777	1.9778	3.6572	3.74174	3.02544	2.68876	4.0975	3.06714
CACUL1	5.9286	6.56915	5.94081	6.40734	7.03398	6.18189	6.00987	5.9765	6.09434	6.30001	6.59887	6.61448	6.27305	6.39582	6.12259	6.20231	6.60008	6.58921
CACYBP	9.55689	9.40488	9.5168	9.54342	9.91871	9.61439	9.69816	9.9616	9.817	9.59661	9.75704	9.84687	9.71542	9.41604	9.67008	9.37063	9.27079	9.27223
CAD	6.67498	6.75467	6.46641	6.1626	3.62161	5.91143	6.55908	6.92877	6.48883	6.66091	6.2425	6.29262	5.66629	5.9428	5.71821	5.32341	6.61046	6.22518
CADM1	2.93671	2.6974	1.83648	2.43688	1.52846	1.54069	1.80233	2.4976	1.95043	2.18145	2.22947	0	1.80289	1.61491	1.06958	0.932009	1.92723	2.32943
CALCOCO1	3.16799	3.20625	3.3219	3.64134	3.38183	3.52372	3.99339	2.4976	3.93776	4.02884	1.9135	4.14191	3.6572	1.90711	3.11964	3.5723	3.52509	2.94675
CALCOCO2	7.22986	7.13854	7.21776	6.82188	7.15339	7.11345	6.88176	7.18062	6.9056	6.80474	6.77931	6.84094	7.52646	7.13536	7.19026	7.50524	7.16254	6.9596
CALCRL	3.96759	2.6974	4.34236	2.65481	2.7343	2.9416	3.27908	1.35002	0	3.01296	3.35389	2.29823	3.74909	3.88292	4.37703	3.9567	3.23415	3.28142
CALM1	9.30693	9.31143	9.38983	9.28622	9.83782	9.42301	9.44366	9.26682	9.35988	9.20254	9.02324	9.19678	9.11053	9.21203	9.46218	9.26814	9.04251	9.12569
CALM2	12.653	12.3872	12.5628	12.39	13.3915	12.7552	12.8152	13.0261	12.8307	12.4055	12.602	12.3613	12.4351	12.6671	12.7879	12.364	12.0081	12.2268
CALM3	8.1254	8.15787	8.12261	8.4755	8.56208	8.5031	7.76448	8.47474	8.27135	8.33443	8.31845	8.41335	7.79251	7.55488	7.56146	7.62288	7.81544	7.81883
CALML4	3.54233	3.40614	4.80733	2.18007	3.82716	4.39561	3.99339	4.17318	5.14481	3.6766	4.13777	3.55778	4.78404	3.94864	3.11964	5.11243	3.8395	4.53252
CALR	9.8323	9.63757	9.37035	9.64873	9.59223	9.67798	10.4426	9.93673	10.1582	9.68603	9.61323	9.61241	9.44359	9.25163	9.51188	9.1715	9.41254	9.33803
CALU	7.38729	7.11018	6.80179	7.17029	7.43058	6.82846	6.86646	6.0458	7.08374	7.15425	6.87311	7.4543	7.03636	6.6736	7.10646	7.15621	7.25148	7.26039
CAMK1D	7.13739	7.18688	7.41541	7.28091	4.96146	6.92229	6.72094	6.89161	6.74148	7.42552	7.376	7.00397	7.23219	7.21764	6.84896	7.5338	7.73705	8.04459
CAMK2B	1.22115	1.90426	1.19263	1.86743	2.7343	1.54069	0	1.35002	2.40527	2.18145	0.942911	1.56524	0.871627	1.2481	1.06958	0.932009	1.6334	1.22775
CAMK2D	8.49369	8.53121	8.46466	8.78655	9.12156	8.73735	8.16541	8.26553	7.86453	8.13109	8.43454	8.61064	8.10664	8.18238	8.11272	8.42709	8.45123	8.62773
CAMK2G	4.71673	4.9937	4.73951	4.4133	4.56178	4.63614	3.74836	5.13263	4.58009	4.98396	3.79843	4.36406	4.20353	4.64774	4.80328	5.1498	4.55004	4.30657
CAMK4	7.84542	7.54043	7.69146	7.69157	7.49229	7.74715	7.3896	7.36816	7.14343	7.45489	7.78484	7.88931	7.3247	7.42236	7.3494	7.89464	7.53382	7.77971
CAMKK2	5.83076	5.51022	5.5633	5.9524	5.40821	6.02153	4.94738	4.59916	5.02298	5.87667	5.44064	5.97079	4.64743	5.08775	5.01419	5.35575	5.35566	5.68161
CAMKMT	4.64177	4.43121	3.79253	4.35224	4.96146	4.52088	5.05925	5.19497	4.88991	4.54814	4.4123	5.14108	3.74909	4.60761	4.37703	4.4517	4.15538	4.30657
CAMKV	2.66114	1.90426	4.14681	3.16132	2.25386	3.63876	1.16601	2.4976	0	3.80381	2.22947	1.9778	2.11066	2.5394	1.40503	2.21155	2.17122	1.88129
CAMLG	7.30466	7.33517	7.64589	7.86003	8.66615	7.72128	7.67071	7.58154	7.69538	7.22415	7.99765	7.67782	7.77622	7.63192	7.89024	7.33721	7.4782	7.35212
CAMSAP1	4.85588	4.7942	4.73951	5.035	2.25386	4.74286	5.0044	4.17318	2.75056	5.72418	5.24398	4.77874	4.44249	4.93398	4.17246	5.11243	5.08483	5.82512
CAMSAP2	8.04768	8.1544	8.40024	8.01087	9.5887	8.38859	8.3691	8.41706	8.27802	7.8434	8.02345	8.27419	7.74308	8.03887	7.9651	8.02104	7.65916	7.70745
CAMTA1	8.40013	8.45432	8.48033	8.80661	9.70077	9.00465	8.96882	8.90128	9.07574	8.58525	8.7876	8.92748	8.72564	8.75539	8.79741	8.55101	8.64552	8.5754
CAMTA2	1.87289	1.24585	0	1.86743	0	1.54069	1.16601	2.03503	3.46298	2.5147	0	2.78195	2.11066	2.84574	1.90575	1.89677	1.92723	2.81539
CAND1	7.31676	7.38337	7.74432	7.54921	7.64952	7.4253	7.20732	7.32699	7.08374	7.5487	7.40769	7.5778	7.44636	7.63192	7.68985	7.63611	7.58211	7.72128
CAND2	3.83928	3.94501	4.34236	5.035	4.16696	3.26183	4.7614	2.84732	3.63918	4.39492	4.21145	4.05954	3.45374	2.97754	3.29139	3.45776	3.8395	3.9784
CANT1	4.64177	5.02443	3.92054	4.22178	5.12624	5.29229	5.30601	4.40183	4.18502	4.87227	4.47348	4.82933	4.26708	4.79795	4.48716	5.25645	5.22659	5.08234
CANX	9.02666	8.62942	8.53135	8.94743	8.56926	8.82195	8.604	8.43008	8.49403	8.23634	8.62859	9.00104	8.35716	8.40064	8.60523	8.69386	8.5217	8.72015
CAP1	8.04768	8.13693	7.61783	7.92437	7.96458	7.62688	7.9355	8.02933	7.93378	7.85813	7.78484	7.4543	7.66266	7.63192	7.67441	7.7005	7.35392	7.41019
CAPG	6.49504	6.53755	6.88261	7.08842	7.24587	7.33435	7.30134	7.00034	6.98931	7.04259	7.04419	6.91308	6.39185	7.04058	6.90955	6.94919	7.00616	6.86312
CAPN1	6.55755	6.66001	6.78507	6.48049	6.25534	6.47296	6.72094	6.834	6.72204	6.5382	6.7425	7.03663	6.37752	6.39582	6.12259	6.32175	6.46926	6.40729
CAPN10	3.69843	5.24917	4.51454	4.15185	2.7343	3.11058	4.469	4.17318	4.39604	3.6766	3.79843	2.56027	4.59886	4.07174	4.21576	4.99411	4.92762	4.09628
CAPN10-AS1	0	1.24585	0	0.912987	1.52846	1.54069	0	0	2.75056	1.12347	1.50833	0.985236	0.871627	1.61491	0	2.68876	1.6334	0
CAPN15	4.39025	4.3846	4.51454	4.47187	2.7343	3.26183	3.74836	4.85223	3.63918	4.54814	3.69947	4.77874	3.34013	4.2903	3.71006	3.77726	4.15538	3.85002
CAPN2	0	0	0	1.46774	1.52846	1.95009	0	1.35002	0	1.74734	1.50833	0	0	0	0	0.932009	0.766223	2.12269
CAPN3	0	1.24585	1.83648	1.46774	0	1.95009	1.16601	0	1.95043	0	0.942911	1.9778	0.871627	1.2481	1.67701	0.932009	0.766223	0
CAPN7	6.07823	5.83882	5.71225	5.14709	4.16696	5.10489	5.30601	4.92761	5.71611	5.18432	5.58624	5.43043	5.56878	5.30407	5.65669	5.79379	5.05473	5.66262
CAPNS1	8.86305	9.26715	8.73226	8.98311	9.0257	9.02859	9.00768	8.88247	9.00108	8.65441	8.82623	8.71858	8.59243	8.4297	8.42786	8.46836	8.60455	8.30854
CAPRIN1	8.34213	8.28702	8.36692	8.31677	7.83958	8.36371	8.04147	8.02933	8.09363	8.00437	8.21476	8.46226	8.36081	8.21946	8.02719	8.43847	8.15395	8.33577
CAPRIN2	4.5627	4.23501	4.66835	2.65481	4.44179	3.52372	3.87608	3.74343	3.26223	4.68665	4.84157	4.82933	4.5486	3.94864	3.64819	3.67842	3.43448	5.13838
CAPS	0	2.53619	2.28008	1.86743	1.52846	0.96692	3.27908	1.35002	4.06668	3.38261	3.35389	3.29524	2.11066	2.35779	1.90575	0.932009	3.12249	2.67086
CAPS2	2.66114	3.66203	2.89306	1.46774	2.25386	2.9416	2.57909	1.35002	1.28241	2.5147	3.35389	3.67306	3.6572	2.70069	2.92465	1.89677	2.72388	2.94675
CAPSL	3.69843	2.14697	2.61888	2.8441	3.09409	3.84451	2.24237	3.12858	3.63918	3.20959	3.97805	3.14357	2.76725	3.20972	3.82638	3.5723	3.76708	3.3777
CAPZA1	8.9157	8.69056	8.57578	8.68189	9.56736	8.98847	8.8455	8.7329	8.77916	8.48914	8.70072	8.91875	8.45592	8.82047	8.7595	8.46836	8.48266	8.46192
CAPZA2	6.67498	6.96727	7.32576	6.40734	7.29863	6.86436	6.33289	7.08509	6.93967	6.34254	6.13299	6.57054	6.5535	6.57299	7.06563	6.57629	6.29994	6.23806
CAPZB	8.42829	8.48502	8.2129	8.43559	8.33672	8.48014	8.27953	8.45577	8.42355	8.84766	8.63529	8.63573	8.38608	8.17553	7.99648	8.30816	8.12889	8.16415
CARD11	5.65131	5.57392	4.73951	5.82337	2.25386	4.88947	5.394	5.31211	5.63526	5.03672	5.47096	4.92548	4.73993	5.55679	5.03851	5.64467	5.17155	5.66262
CARD16	6.78357	6.461	6.68046	6.85527	6.65669	7.10346	6.9267	7.03484	6.7796	6.44369	7.06421	6.49421	7.09006	6.77672	6.77851	6.78073	6.4578	6.67698
CARD19	6.10638	6.07728	6.48724	6.18027	6.57348	6.27376	6.37674	6.26507	6.44206	5.23034	6.31114	5.49453	6.05633	5.91018	6.30407	5.59133	5.68533	5.68161
CARD6	1.22115	3.20625	2.28008	3.2971	2.7343	3.26183	3.27908	0	2.75056	0	3.06682	3.67306	2.76725	2.97754	1.90575	1.49358	3.52509	2.51022
CARD8	6.49504	6.34408	6.40207	6.49469	7.07489	6.37679	5.89394	6.11192	6.18234	5.96098	6.18878	6.32824	6.28844	6.24703	5.95383	6.28862	6.50309	6.52759
CARD8-AS1	4.08542	4.28661	3.92054	4.4133	4.56178	4.79341	4.88801	4.50386	5.14481	4.68665	4.47348	4.61537	5.06002	4.90115	5.32222	5.1498	4.41437	4.57376
CARF	3.69843	1.90426	4.2479	2.43688	3.62161	2.9416	3.45303	3.74343	3.02896	3.92071	2.48852	3.43247	2.93316	2.84574	3.51586	1.49358	3.69084	3.3777
CARHSP1	8.74714	8.88934	8.68797	9.22368	9.07695	9.33618	8.99367	9.04361	8.97667	9.03112	8.84661	9.11758	8.67382	8.95049	8.82039	8.63578	9.00757	8.93515
CARM1	6.23944	6.48329	6.60624	6.68002	5.98181	6.14344	6.68651	6.73257	6.48883	6.36335	6.67898	6.38006	5.86421	6.12441	5.91495	6.16629	6.28705	5.85887
CARMIL1	3.36727	2.35466	2.61888	3.2971	1.52846	2.9416	3.08125	0	4.18502	2.18145	1.9135	2.78195	3.91699	2.97754	2.69913	2.4698	3.69084	1.88129
CARMIL2	5.09943	5.05451	5.81467	4.99562	3.62161	5.29229	5.55535	5.47172	5.41078	5.18432	5.40967	4.49518	4.90883	5.42445	4.91259	5.07406	5.19933	5.34304
CARNMT1	5.04229	4.68305	3.65205	3.91906	3.82716	4.84224	4.38561	4.77271	4.18502	4.54814	4.06012	3.55778	4.5486	4.76183	4.17246	4.39056	4.0975	4.61384
CARNS1	1.22115	1.24585	1.19263	2.65481	1.52846	0	1.80233	1.35002	0	1.74734	2.22947	0.985236	1.80289	0	1.06958	0.932009	0.766223	0.740719
CARS	6.74827	6.63035	6.58708	6.62945	5.84658	6.12383	7.11971	6.68991	6.64153	6.74258	6.49942	6.61448	7.46002	7.65672	7.49711	7.55485	7.28428	7.31613
CARS2	5.68903	6.03264	5.6397	5.3481	5.47086	5.48911	6.1428	5.66029	6.06377	5.18432	5.05676	5.94808	5.29158	5.32896	5.50786	5.59133	5.27961	5.62389
CASC15	4.92073	3.40614	4.80733	3.73997	1.52846	3.63876	3.60824	4.04365	4.18502	4.39492	4.7944	3.43247	3.99413	4.56634	4.55617	4.03868	3.52509	4.40124
CASC2	2.32019	2.35466	1.83648	2.8441	2.25386	0.96692	0	2.84732	1.95043	3.01296	3.35389	1.9778	2.11066	3.20972	2.10315	2.21155	3.12249	1.59121
CASC3	7.43247	7.5244	7.62724	7.42129	5.2741	7.0525	7.14529	6.85346	6.55626	7.32305	7.3188	7.3542	7.36882	7.57583	7.44347	7.30444	7.41444	7.52502
CASC4	6.91671	7.103	6.78507	7.05048	6.62949	7.30852	6.83537	6.62346	6.34371	7.05544	7.03407	7.15044	6.98058	6.88141	6.99902	6.82761	6.55778	6.85478
CASD1	4.47905	4.23501	4.8721	4.68495	4.56178	4.39561	3.87608	4.04365	5.02298	4.31173	3.79843	4.55653	4.90883	5.08775	4.74536	4.32672	4.36616	4.49008
CASK	4.19434	5.46613	5.10551	5.439	4.31091	4.74286	4.10189	4.40183	4.29438	5.55364	4.88726	4.77874	4.69442	4.76183	4.62203	5.50743	4.46103	5.21857
CASP1	6.3377	6.06255	5.97069	6.60349	6.2193	6.3262	6.50083	6.0458	6.83495	6.27827	6.09456	5.55591	6.43399	6.46484	6.25303	5.92893	6.12266	5.62389
CASP10	4.98279	4.93022	4.14681	4.4133	5.53091	4.57966	5.0044	3.90134	5.02298	4.31173	4.53217	5.10046	5.4642	4.96607	5.68778	5.32341	4.67403	4.20525
CASP16P	0	0.753427	0	0	0	0	0	0	1.28241	1.74734	0	1.56524	0	0.755007	1.40503	0.932009	0.766223	1.59121
CASP2	7.03859	7.05172	6.78507	7.28907	6.54465	7.47259	6.44012	6.75344	6.44206	7.27993	7.3188	7.64995	6.73302	7.30179	6.89631	7.47611	7.46109	7.42716
CASP3	7.10985	7.12443	6.85083	7.11623	7.33277	7.33435	7.06715	7.36816	7.25587	7.05544	7.07412	7.20892	7.50025	7.38129	7.68215	7.82702	7.67409	7.53026
CASP4	7.87025	7.81541	7.89997	7.3528	7.93155	7.62688	7.82903	8.01212	7.77302	7.33363	7.24176	7.2373	7.73186	7.56015	7.94273	7.60953	7.5501	7.44949
CASP6	6.3377	6.18999	5.87912	6.37701	6.2905	5.91143	6.1428	6.34972	6.34371	5.96098	6.25997	6.46251	6.20976	5.95884	6.17838	5.44866	5.78037	5.93995
CASP7	5.44634	5.32518	5.44054	5.55191	5.79854	5.0643	5.05925	4.04365	5.25715	5.51698	4.4123	5.21904	5.94416	5.95884	6.22151	6.20231	6.04822	5.71885
CASP8	5.65131	5.37371	5.44054	4.4133	3.62161	5.45811	4.88801	4.04365	5.14481	4.9292	5.13459	3.87921	4.44249	5.3775	5.01419	5.03464	5.05473	4.89982
CASP8AP2	7.03859	6.461	6.28801	6.18027	4.16696	5.95649	6.03745	5.52122	6.21052	7.31239	6.83864	6.76501	7.41163	6.83001	7.26431	7.13772	7.0218	7.19583
CASP9	5.20734	4.7581	5.25871	5.1826	4.96146	4.84224	4.20279	4.04365	4.29438	3.92071	4.53217	4.77874	4.49652	5.2267	5.38046	5.41835	5.30541	5.64338
CAST	7.31676	6.73623	6.89825	6.72887	5.69736	6.62023	7.25509	6.6681	7.0989	7.00337	7.25053	6.88943	7.17535	6.87297	7.03573	7.05148	7.12681	7.28543
CASZ1	0	2.6974	3.12336	2.65481	0	1.95009	3.27908	1.35002	2.75056	1.74734	0	2.29823	1.41113	2.70069	1.67701	0.932009	0	2.12269
CAT	7.87844	7.7341	7.58922	7.58945	8.22302	7.84624	7.50277	7.63874	7.44564	7.36491	7.61875	7.40512	7.66266	7.29549	7.68985	7.39283	7.014	7.07179
CATSPER2P1	2.32019	0.753427	0	1.46774	1.52846	1.95009	1.80233	0	0	2.18145	1.50833	0.985236	0.871627	0.755007	0	2.68876	0.766223	1.59121
CAV1	0	0	2.28008	0	0	0	1.16601	0	2.40527	0	1.50833	0	1.41113	0	0	0	0	0.740719
CBFA2T2	3.83928	3.49658	4.66835	4.52817	3.09409	4.25841	4.88801	4.59916	4.58009	4.9292	4.84157	4.21982	4.38636	4.76183	3.82638	4.25992	5.08483	4.53252
CBFA2T3	3.54233	3.94501	4.14681	4.4133	2.7343	4.39561	3.87608	3.90134	4.29438	5.13677	4.7944	4.55653	4.32795	5.08775	4.37703	4.81956	5.60452	5.13838
CBFB	7.88658	7.58749	7.57956	7.81549	7.76653	7.72128	7.28991	6.89161	7.76354	7.36491	7.61875	7.4217	7.65079	7.90869	7.54033	7.63611	7.89405	7.77087
CBL	5.35543	5.55299	4.43102	5.88933	4.31091	5.60683	5.1121	5.47172	5.41078	5.27494	3.97805	5.58564	5.51744	4.7248	5.45463	6.09142	6.19345	5.84209
CBLB	6.23944	6.18999	5.5633	5.46806	4.77542	5.71567	5.80043	5.42045	6.18234	5.51698	6.51405	5.58564	6.05633	5.77178	5.99169	5.35575	5.86954	5.89185
CBLL1	6.26464	5.98657	6.28801	6.71681	6.48518	6.84053	6.31045	6.07924	5.82948	6.51979	6.95046	6.68485	6.40603	6.70246	6.61023	6.89519	6.72958	6.74173
CBLN3	0	0	1.83648	2.18007	0	0.96692	3.87608	1.35002	1.28241	1.12347	2.48852	1.9778	2.76725	2.35779	2.81629	3.33332	1.92723	1.88129
CBR1	1.22115	2.14697	1.83648	2.8441	0	1.95009	0	0	0	0	1.50833	2.56027	0.871627	1.2481	0.631718	2.21155	0.766223	1.88129
CBR3	6.10638	5.80383	5.7472	6.12659	7.03398	6.25585	6.26451	6.0458	6.55626	6.36335	6.01448	6.27448	6.57877	6.36004	6.77127	6.01246	5.83453	6.38429
CBR3-AS1	1.22115	1.24585	1.19263	3.01141	1.52846	1.95009	3.74836	2.84732	2.40527	2.18145	0	1.9778	2.11066	2.14998	2.5716	2.87883	2.17122	2.51022
CBR4	6.69366	6.461	6.37997	6.8879	6.65669	6.36012	6.06452	6.20575	6.34371	6.50114	6.07495	6.46251	6.1935	6.6736	6.62636	6.44714	5.79865	5.82512
CBWD1	6.55755	6.2562	6.16416	6.56364	6.2193	6.50364	6.70383	6.55381	5.93458	6.6096	6.70472	7.06857	6.1935	6.03646	6.27366	6.30528	6.17957	6.3491
CBWD2	6.49504	6.06255	5.6397	6.31436	6.2193	6.44161	6.03745	6.37686	6.06377	6.0914	6.2425	6.69852	6.33367	6.26003	5.99169	6.14793	5.62515	6.00169
CBWD3	6.02023	5.85601	5.78133	5.99297	6.2193	6.29145	6.00987	6.07924	5.86537	6.32144	6.1139	6.5098	6.25748	5.82525	5.96656	5.9713	5.92051	6.06089
CBWD5	7.91073	7.32903	7.52017	7.48667	7.94264	8.01013	7.7395	7.82767	7.52633	7.78292	7.64558	7.85309	7.74308	7.7003	7.47054	8.00583	7.44378	7.47147
CBWD6	6.04952	5.85601	5.35249	5.86768	5.34271	5.60683	5.86344	5.90371	5.86537	5.62429	6.20691	6.12049	5.84352	5.57772	5.60877	5.84025	5.40422	5.89185
CBX1	8.30009	8.20892	8.33281	8.29666	7.75399	8.30396	8.02089	7.98591	8.07842	8.60722	8.64197	9.03915	8.29373	8.15479	8.18259	8.55449	8.12889	8.22041
CBX2	5.76163	6.61024	6.26408	7.00162	5.40821	6.00018	5.89394	5.74607	5.82948	6.57434	6.48463	6.32824	6.43399	6.50908	6.08805	6.5625	7.32269	6.82093
CBX3	10.8462	10.7461	10.7099	10.4017	10.9513	10.5432	10.7649	10.892	10.7601	10.578	10.6509	10.491	10.4374	10.4775	10.6322	10.3685	10.2154	10.2078
CBX4	5.89672	5.32518	5.10551	5.49656	3.09409	6.04258	5.394	5.52122	5.67626	5.5894	5.58624	5.64333	6.5407	6.552	6.36304	6.69483	6.71039	6.66749
CBX5	9.55178	9.4995	9.4441	9.69864	9.21604	9.69469	9.10541	9.21511	9.19337	9.89513	9.8537	9.84687	9.54962	9.30122	9.32432	9.7063	9.67992	9.7276
CBX6	2.32019	1.61229	3.92054	3.2971	0	3.63876	1.16601	3.90134	2.75056	4.22346	2.70806	3.77981	3.21681	2.5394	1.90575	2.87883	3.52509	4.03854
CBX8	1.22115	2.35466	3.3219	2.18007	1.52846	1.54069	2.24237	0	1.28241	2.18145	2.70806	2.56027	3.74909	3.50011	3.11964	2.68876	2.5621	3.3777
CBY1	4.19434	4.60389	4.5935	4.63456	5.0462	3.7453	4.7614	5.19497	4.06668	5.03672	3.97805	4.21982	4.86842	4.7248	4.12782	4.62095	4.75114	4.72783
CC2D1A	2.93671	4.3846	3.12336	3.83229	2.25386	3.7453	3.87608	5.13263	4.88991	3.92071	3.89103	3.29524	4.26708	4.76183	4.65386	4.51035	4.0975	4.03854
CC2D1B	5.61258	5.34965	5.44054	4.35224	3.09409	4.4596	4.20279	4.92761	5.14481	4.31173	5.40967	4.61537	4.86842	4.96607	4.96428	5.03464	5.86954	5.43541
CC2D2A	4.39025	4.06809	4.73951	4.95513	3.62161	3.63876	4.6226	3.74343	3.79618	4.02884	5.13459	4.92548	4.13705	3.66561	4.2578	4.72367	4.63387	3.06714
CCAR1	7.96554	7.87141	8.36692	7.76368	5.89308	7.16234	7.78902	8.00343	7.70532	8.25316	7.79686	7.80334	8.08916	7.67139	7.83923	7.80961	7.79283	7.74403
CCAR2	5.99033	6.57953	6.56766	5.9524	5.58855	5.51945	4.88801	5.06747	5.63526	5.36021	5.9077	5.55591	5.80121	6.66385	6.65023	6.83909	6.8484	6.4411
CCDC106	3.36727	2.14697	1.83648	3.91906	3.62161	4.25841	3.08125	2.84732	3.02896	3.38261	3.69947	3.77981	3.08194	3.88292	2.4317	3.77726	2.86934	2.81539
CCDC107	5.09943	4.8974	4.73951	5.60522	4.67255	4.84224	5.51667	6.07924	5.79267	4.61906	4.88726	5.14108	5.16384	4.90115	4.96428	4.67322	4.63387	4.65285
CCDC110	0	1.61229	0	0	0	0.96692	3.08125	0	0	0	0	0	0	0	0.631718	0	0	1.59121
CCDC112	9.80679	9.86678	10.0781	9.96394	10.3228	9.81578	9.95477	10.0943	9.97319	9.97334	10.0321	10.1315	9.94041	9.85895	9.92534	9.90382	9.76255	9.85118
CCDC115	4.92073	5.51022	5.25871	4.78074	4.87144	4.9352	5.21231	5.13263	5.45856	5.55364	4.93154	5.64333	5.40893	5.19996	4.98945	5.44866	4.67403	5.02403
CCDC117	7.43247	7.59774	7.58922	7.88719	8.09958	8.05743	7.57983	7.45987	7.64465	7.8059	7.57754	7.56293	7.6207	7.27	7.72774	7.5618	7.85964	7.8401
CCDC12	7.25523	6.87756	6.92902	7.2309	6.25534	7.0731	7.25509	7.38162	7.12874	7.20123	7.06421	6.91308	6.77734	6.60392	6.5353	6.60349	7.04496	6.83795
CCDC120	3.54233	3.20625	2.61888	3.01141	3.09409	2.9416	2.85191	2.03503	2.40527	3.92071	1.9135	1.9778	2.57975	3.81405	2.69913	3.33332	4.41437	3.17825
CCDC121	2.66114	2.35466	2.89306	3.16132	2.7343	2.26863	3.08125	0	0	3.20959	2.48852	0.985236	2.76725	0	2.92465	2.68876	1.26401	2.12269
CCDC122	4.78798	5.16894	4.51454	4.87057	4.77542	4.9352	5.1121	5.25473	4.81846	5.03672	4.69515	5.10046	4.69442	4.52384	5.30227	5.07406	4.03719	5.45761
CCDC124	6.57779	6.56915	6.40207	7.02136	5.58855	6.71505	7.09367	7.00034	7.21473	7.08078	6.89564	6.77794	6.22585	6.32335	6.2426	6.64334	6.44625	6.58921
CCDC125	5.68903	5.93898	6.28801	6.1626	3.82716	5.29229	6.53992	5.78713	5.71611	6.6269	6.36057	6.19954	6.90269	6.37207	6.64232	5.72116	6.03286	6.51706
CCDC126	4.29562	4.47635	5.30636	4.47187	4.44179	5.39405	5.21231	5.19497	3.93776	4.47356	4.74563	5.10046	3.99413	5.05828	5.26152	5.07406	4.50622	4.99396
CCDC127	4.5627	5.27495	4.73951	4.87057	5.0462	4.74286	4.82609	5.19497	4.664	5.47935	5.31255	5.39728	5.13006	4.96607	5.28204	5.11243	5.30541	5.24434
CCDC13	2.32019	1.24585	2.61888	2.18007	2.25386	3.39871	0	2.03503	0	0	2.48852	3.29524	1.41113	1.90711	1.40503	2.4698	2.5621	2.12269
CCDC130	4.71673	5.27495	5.20942	4.52817	3.38183	4.4596	4.82609	3.90134	5.82948	4.81301	4.84157	3.77981	5.22912	5.19996	5.08596	5.50743	5.56235	4.76391
CCDC134	2.93671	3.09486	2.61888	2.18007	1.52846	1.54069	4.10189	3.12858	0	1.74734	1.9135	3.29524	2.93316	1.61491	3.51586	0	1.92723	1.22775
CCDC136	4.64177	4.18148	3.92054	3.16132	0	3.26183	4.69366	4.04365	2.75056	4.39492	4.53217	4.49518	3.55906	3.66561	4.83139	4.25992	4.31628	4.44634
CCDC137	6.28941	6.28186	6.37997	6.24888	3.62161	6.25585	6.46064	6.11192	6.06377	6.78945	6.46969	6.69852	6.78821	6.57299	6.48309	6.68213	6.75788	6.71433
CCDC138	6.38443	5.83882	6.35752	5.63115	6.25534	6.51874	6.19272	6.55381	6.06377	6.6096	6.48463	6.55559	6.43399	6.63419	7.01136	6.43205	6.39911	6.3491
CCDC14	5.76163	5.55299	6.02867	5.86768	5.79854	5.0643	6.63327	6.40351	5.82948	5.98802	5.76817	5.43043	6.91266	6.39582	6.70444	6.20231	5.8167	6.15898
CCDC141	4.71673	4.33644	2.89306	4.07835	3.38183	3.26183	2.57909	3.12858	3.46298	4.02884	4.53217	4.61537	3.21681	4.18515	3.98496	4.11626	3.90845	4.30657
CCDC142	3.16799	3.20625	1.83648	1.46774	2.7343	3.26183	3.60824	2.03503	3.26223	2.5147	2.48852	1.9778	2.76725	2.35779	2.10315	1.89677	2.86934	2.94675
CCDC144A	3.54233	1.61229	2.61888	3.01141	2.25386	3.26183	3.08125	3.36386	2.75056	3.20959	3.47851	3.14357	3.34013	2.84574	2.81629	3.19714	2.5621	3.17825
CCDC144B	3.96759	3.58167	4.2479	3.73997	2.25386	3.63876	3.45303	3.56609	4.491	3.6766	4.13777	4.43111	3.34013	3.66561	3.8812	3.9567	3.8395	4.30657
CCDC144CP	3.16799	2.53619	2.61888	2.18007	1.52846	2.26863	1.16601	0	1.95043	2.5147	3.47851	3.77981	2.36419	2.5394	2.81629	3.45776	2.86934	3.46795
CCDC146	3.16799	2.97415	4.14681	3.91906	3.38183	1.95009	5.21231	4.68854	4.06668	4.87227	4.64284	3.87921	4.06736	3.66561	3.8812	4.51035	3.90845	3.55289
CCDC15	5.35543	5.34965	4.66835	5.28416	4.77542	4.84224	4.7614	4.99923	4.88991	4.54814	5.13459	5.18058	5.54334	5.44737	5.77721	5.67062	5.40422	5.13838
CCDC150	3.69843	4.06809	4.14681	4.28849	4.31091	4.69049	5.47693	3.90134	4.664	3.92071	4.13777	3.77981	5.68967	5.08775	5.10911	5.03464	4.92762	5.02403
CCDC152	8.13226	7.75257	8.50095	8.11102	7.3158	8.09317	8.17785	8.32249	7.64465	8.48914	8.47624	8.29234	8.36445	8.20944	8.29284	8.16033	8.14683	8.44258
CCDC157	1.22115	1.90426	3.12336	3.91906	3.82716	2.75017	3.74836	2.4976	1.28241	2.5147	2.70806	2.29823	3.21681	3.31315	1.06958	2.68876	2.86934	3.06714
CCDC163	4.85588	4.33644	3.3219	3.16132	4.44179	4.97953	4.7614	3.56609	1.95043	4.31173	4.21145	3.67306	5.26069	3.50011	4.68501	4.72367	4.50622	4.44634
CCDC167	8.88353	8.69773	8.80041	8.52475	9.31327	8.8189	9.46667	9.64171	9.45717	8.36053	8.3916	8.53645	9.00963	8.84225	9.03956	8.38069	8.38925	8.36836
CCDC168	2.32019	0	0	0	0	0	0	0	0	0	1.50833	1.56524	1.41113	0	1.06958	0.932009	0	1.88129
CCDC171	4.98279	4.33644	5.10551	4.87057	4.16696	5.68922	3.60824	3.12858	3.93776	5.31821	5.47096	5.14108	5.13006	4.3883	4.83139	4.51035	5.60452	4.93189
CCDC174	6.65606	6.67944	6.78507	6.9407	6.42316	6.68859	6.37674	6.34972	6.53413	7.44517	7.07412	6.86539	7.9557	7.42813	7.63109	7.59605	7.4782	7.5817
CCDC175	1.22115	0.753427	1.19263	0.912987	1.52846	2.75017	1.80233	2.03503	1.28241	2.78523	0	3.29524	2.11066	0.755007	0.631718	0	2.17122	1.22775
CCDC18	6.57779	6.36823	6.64383	5.75426	5.34271	6.00018	6.21705	5.86588	6.51166	6.71047	6.46969	5.85347	6.66387	6.49814	6.94858	6.40139	6.19345	6.61907
CCDC183-AS1	4.29562	3.40614	2.61888	3.2971	2.25386	1.95009	2.85191	3.56609	2.75056	3.6766	3.47851	4.21982	3.83548	3.88292	3.02544	2.87883	3.52509	3.28142
CCDC186	6.13399	6.2562	6.56766	5.88933	5.34271	5.63482	6.1428	6.29384	5.96798	6.83485	6.71742	7.01494	6.89265	6.54139	6.5007	6.4168	6.55778	6.47415
CCDC189	3.54233	2.8424	3.3219	2.8441	2.25386	3.11058	4.29709	2.84732	4.664	2.18145	3.06682	2.78195	2.93316	4.0115	3.71006	3.33332	3.76708	2.81539
CCDC18-AS1	2.66114	2.35466	3.4964	2.18007	2.7343	3.39871	4.29709	3.90134	2.75056	2.78523	3.47851	3.77981	4.06736	2.14998	2.27675	3.77726	3.33779	3.06714
CCDC191	4.98279	4.7942	4.03811	4.22178	3.09409	4.74286	4.6226	4.40183	3.46298	5.55364	5.0962	5.01562	3.99413	4.52384	4.2578	4.32672	5.08483	4.03854
CCDC22	4.5627	5.42066	4.03811	4.35224	3.62161	4.79341	4.82609	4.29203	5.41078	4.39492	5.05676	4.49518	4.5486	4.60761	4.2578	5.03464	4.78821	4.61384
CCDC25	7.71437	7.65285	7.46874	7.75781	7.93155	8.04705	7.53215	7.78777	7.76354	7.61959	7.74197	8.08937	8.02627	7.56015	7.7127	7.90013	7.53927	7.90616
CCDC28A	7.95784	7.69166	7.78694	7.85454	8.73796	8.08812	7.99298	8.16009	7.83768	8.06278	8.02856	8.16025	8.31268	8.08709	8.24139	8.3368	7.93181	8.09503
CCDC28B	5.72579	6.26909	5.84725	6.31436	7.07489	6.63416	7.46263	6.37686	6.87071	6.42402	6.01448	6.58534	6.82034	6.91468	6.5007	6.63018	6.76719	6.81234
CCDC34	8.21862	8.07957	8.32125	7.98093	7.24587	8.02607	8.3194	8.25825	8.23065	8.0564	7.86123	7.90118	8.75641	8.43257	8.48428	8.44975	8.43671	8.20081
CCDC43	6.93252	6.92718	7.05989	6.70465	6.83399	6.70188	7.0126	6.92877	7.05295	7.27993	7.4387	7.03663	7.51341	6.85594	7.16286	7.34529	6.73907	7.12824
CCDC47	6.97894	6.34408	6.46641	6.71681	6.32483	6.63416	6.80359	6.37686	6.51166	7.30165	7.09374	7.31923	7.44636	6.54139	6.98031	7.17446	6.91694	6.99038
CCDC50	8.09059	8.13693	8.06144	8.1202	8.59057	8.01547	7.97882	7.85688	7.97543	8.18467	8.17848	7.97606	8.00779	8.26854	8.28524	8.01599	8.14326	8.24296
CCDC51	5.72579	5.48834	5.10551	6.01283	6.45451	5.88836	5.35068	5.90371	6.34371	5.51698	5.76817	5.01562	5.43683	6.11012	5.65669	5.69611	5.70485	5.77296
CCDC57	5.04229	5.14117	6.0844	4.52817	6.62949	5.60683	5.55535	5.47172	5.02298	4.47356	5.31255	5.01562	5.35145	5.05828	4.98945	4.18988	5.19933	4.83347
CCDC58	7.57022	7.19365	7.05989	7.28907	7.75399	7.40918	7.47277	7.86649	7.76354	7.06816	7.10345	7.62868	7.43948	7.72864	7.43434	7.41602	7.15546	6.83795
CCDC59	7.61989	6.99855	7.11446	7.3528	7.39871	6.79164	7.82903	7.68291	7.62384	7.06816	6.91782	7.28339	7.9166	7.91281	7.92653	7.50524	7.28428	7.29162
CCDC6	4.08542	4.7581	4.73951	4.0009	4.00704	3.26183	3.74836	4.40183	3.93776	4.75121	4.69515	4.67191	4.20353	4.23868	4.17246	3.77726	4.63387	4.72783
CCDC61	2.66114	3.20625	2.28008	2.65481	3.09409	1.54069	2.24237	3.36386	2.40527	3.20959	0	2.29823	2.11066	3.09829	1.67701	0.932009	4.0975	2.67086
CCDC66	6.45181	6.14875	6.75104	6.21498	5.40821	5.68922	6.28766	6.6681	6.44206	6.74258	6.29429	6.31054	7.55856	6.90643	6.94215	6.70742	6.35038	6.69578
CCDC69	8.29399	8.2485	8.41662	8.73367	7.74134	8.19068	8.30812	8.22875	8.23751	8.64594	8.42683	8.49004	8.47959	7.82366	7.9651	8.13259	8.17509	7.9847
CCDC7	3.16799	4.28661	2.28008	0.912987	2.25386	4.10679	3.08125	4.29203	3.46298	4.12943	3.79843	2.56027	3.83548	3.31315	4.98945	3.86977	3.69084	3.78127
CCDC70	4.47905	5.11286	5.5633	5.14709	6.0242	5.36092	5.86344	5.13263	5.3102	5.75599	5.83962	5.55591	5.09546	5.08775	5.24071	5.50743	5.02399	4.72783
CCDC71	3.54233	3.30966	2.28008	3.53547	2.7343	1.95009	4.20279	3.56609	3.46298	3.20959	3.21748	3.67306	2.93316	2.97754	2.92465	0	3.8395	3.55289
CCDC71L	5.20734	5.80383	5.67643	6.05175	5.53091	5.79223	5.25992	5.19497	5.36136	5.75599	5.6406	5.69881	5.59378	6.11012	5.4726	5.84025	5.74311	5.9241
CCDC74A	5.72579	4.8974	6.1898	5.37904	3.62161	4.88947	5.1121	5.19497	5.7549	5.18432	4.84157	5.05866	5.73533	5.2267	5.13189	5.18623	5.64549	5.54314
CCDC74B	5.09943	4.1259	4.66835	4.22178	3.09409	4.25841	4.38561	4.29203	5.02298	4.22346	4.47348	4.87821	4.44249	4.3883	4.12782	4.03868	4.78821	4.53252
CCDC77	6.36126	5.90636	4.93408	5.99297	4.67255	5.79223	6.55908	5.56908	6.06377	5.65836	5.61368	6.16055	6.1935	6.15258	6.35338	6.09142	6.37495	6.19906
CCDC82	7.67732	7.67723	7.52017	6.81058	6.35836	6.86436	7.28991	7.79785	7.36018	7.58458	7.35176	7.6709	8.44222	8.09437	8.40232	8.02607	7.51183	7.47692
CCDC84	7.80304	7.2402	6.69843	6.75269	7.72857	6.9336	7.67949	7.08509	7.29587	7.10569	6.62607	6.84094	7.45321	6.43074	6.92268	6.30528	6.99034	6.82946
CCDC85B	6.23944	6.18999	5.87912	5.82337	6.10543	5.86492	6.31045	6.0458	6.23816	6.0914	6.4546	6.07928	5.4642	5.85982	4.96428	4.90947	5.74311	5.64338
CCDC85C	2.32019	1.61229	0	2.18007	0	0.96692	1.80233	1.35002	1.95043	3.6766	2.22947	2.29823	2.11066	1.90711	1.40503	1.49358	1.92723	1.22775
CCDC86	7.05313	7.13854	7.24246	7.3683	6.48518	6.87614	7.31267	7.56983	7.52633	6.89324	7.30203	7.37138	7.37604	6.90643	6.73453	7.05148	7.13403	7.18921
CCDC88A	8.57148	8.40846	8.33855	8.26388	5.74884	7.49567	7.84473	8.19864	7.79179	8.47009	8.34734	8.13533	8.62615	8.02751	8.24139	8.1965	8.30864	8.48642
CCDC88B	2.66114	2.97415	3.3219	3.4212	2.25386	2.26863	2.57909	3.12858	1.95043	1.12347	1.9135	0	2.57975	0	2.5716	1.49358	2.72388	1.22775
CCDC88C	3.69843	4.7581	5.20942	3.64134	0	2.9416	3.74836	4.50386	4.7433	4.54814	4.34841	3.29524	3.99413	3.94864	3.51586	4.4517	4.41437	4.53252
CCDC9	1.87289	3.66203	2.89306	3.53547	3.38183	4.18459	3.45303	4.17318	4.18502	3.38261	3.59321	3.87921	3.99413	3.94864	3.82638	3.9567	3.97426	3.91563
CCDC90B	7.64889	7.49727	7.82015	7.08842	8.17678	7.38467	7.97169	7.9136	7.77302	7.43538	7.14165	7.56293	7.7871	7.54429	8.08963	7.03159	7.37844	6.99038
CCDC91	7.13739	7.06656	7.26676	7.05048	7.20958	6.74103	7.35713	7.42128	6.92274	7.05544	6.96118	7.34554	7.38323	7.0481	7.32489	6.87301	6.71039	7.10733
CCDC92	4.71673	4.23501	3.92054	4.0009	2.7343	4.57966	5.0044	4.29203	5.08518	4.02884	4.21145	4.61537	3.6572	4.0115	4.08175	4.99411	4.75114	4.44634
CCDC93	4.47905	4.47635	4.5935	5.035	2.25386	4.69049	5.35068	4.29203	5.54962	5.47935	5.13459	5.01562	5.09546	5.08775	5.15432	5.25645	5.60452	5.26965
CCDC94	5.48973	5.44358	5.25871	5.31649	3.82716	4.63614	5.35068	5.06747	5.36136	4.68665	4.06012	5.36335	5.32182	4.76183	5.13189	4.90947	5.4279	4.72783
CCDC97	4.08542	4.06809	4.99352	4.78074	3.09409	4.18459	4.10189	4.59916	3.63918	3.80381	4.47348	4.14191	4.20353	4.18515	4.37703	4.81956	5.27961	5.34304
CCEPR	4.64177	3.73815	3.65205	2.8441	4.67255	3.63876	2.24237	2.84732	3.79618	4.22346	4.69515	6.75195	3.99413	3.40966	4.03417	4.32672	3.90845	3.55289
CCHCR1	4.19434	4.28661	3.65205	3.16132	3.38183	3.11058	3.60824	4.40183	4.18502	4.02884	4.47348	4.43111	4.38636	4.99746	4.62203	4.67322	4.85959	4.83347
CCL28	5.44634	4.96231	5.60201	5.40933	5.74884	5.32701	4.88801	5.06747	5.08518	5.27494	5.17198	4.82933	5.19685	4.76183	5.24071	5.69611	5.58359	4.89982
CCL3	0	0	0	2.65481	3.09409	0.96692	4.29709	0	2.75056	2.18145	2.48852	0	4.26708	3.40966	4.03417	4.62095	3.97426	4.30657
CCL4	0	0	0	3.4212	3.38183	2.75017	4.38561	2.03503	4.664	0	0.942911	1.56524	7.43257	7.59648	7.63109	7.46132	6.77644	7.31613
CCL4L1	1.22115	2.6974	3.12336	3.73997	2.7343	2.26863	4.54784	4.40183	4.95798	3.01296	1.9135	3.55778	7.11618	7.49014	7.29995	7.23657	6.98237	7.03536
CCL4L2	1.22115	2.6974	3.12336	3.73997	3.09409	2.26863	4.54784	4.40183	4.95798	3.01296	1.9135	3.55778	7.11618	7.49014	7.29995	7.23657	6.98237	7.03536
CCL5	0	0.753427	0	0.912987	0	0.96692	3.45303	0	0	0	0.942911	0	0.871627	1.2481	0	2.4698	0	0
CCM2	6.45181	6.30707	6.28801	6.61653	5.74884	6.36012	6.52051	6.64596	5.93458	6.5382	6.42393	5.75222	6.20976	6.13856	6.07636	6.25471	6.09335	5.87546
CCNA1	5.04229	4.56262	3.65205	4.91347	4.56178	4.57966	5.47693	3.56609	4.95798	4.22346	5.27867	4.36406	4.32795	4.43491	4.96428	4.18988	5.35566	5.02403
CCNA2	8.03309	7.98511	8.03339	7.67919	8.34511	8.11321	8.21456	8.25093	8.0318	8.00437	7.67843	7.59252	8.00779	8.06133	8.33764	7.92729	7.62883	7.73042
CCNB1	9.46204	9.47746	9.1852	8.88144	9.68764	9.09809	9.92	9.64171	9.61835	9.08534	9.07843	9.04719	8.85277	8.64076	8.9921	8.10906	8.10338	8.0519
CCNB1IP1	7.53958	7.45842	7.69146	6.9613	8.21389	7.44914	7.50277	7.8178	7.32194	6.71047	7.08397	7.11008	7.74308	8.00837	8.01192	7.2624	7.31	7.16243
CCNB2	9.63868	9.37837	9.44676	9.21942	10.0191	9.32548	9.45904	9.66668	9.37863	9.17926	9.10284	9.04184	8.97199	9.14176	9.25206	8.42328	8.53539	8.55752
CCNC	6.47358	6.74548	6.62516	6.3616	7.36612	6.50364	6.77109	6.6681	6.68234	5.69165	6.25997	6.32824	6.72172	6.76765	6.90955	6.63018	6.22082	6.52759
CCND3	8.01835	8.07591	7.89219	8.18729	7.663	8.0366	7.76448	7.74674	7.95892	7.76739	7.9063	7.79063	8.32766	8.31289	8.17712	7.93801	8.25669	8.02242
CCNDBP1	8.11158	7.72944	7.96823	7.85454	8.78803	7.9886	8.16541	8.14438	8.15291	7.75957	7.5494	7.59983	7.63281	7.76101	7.69368	7.87803	7.2581	7.62157
CCNE1	5.48973	5.98657	5.7472	5.93168	5.64398	5.66228	5.59301	5.25473	5.45856	5.55364	5.44064	5.82882	6.42008	6.26003	6.17838	6.4168	6.38708	6.54842
CCNE2	7.77701	7.72477	8.0263	7.67919	8.81847	7.69493	7.31267	7.7674	7.51507	7.71979	7.83815	7.95912	8.32019	8.5642	8.96697	8.72825	8.38018	8.4945
CCNF	6.21379	6.91903	6.58708	6.33028	6.06539	6.81629	6.39818	5.42045	6.62068	6.5382	6.36057	6.79076	5.82252	6.87297	6.56071	6.46207	6.72958	6.55873
CCNG1	7.17775	7.35344	7.30245	7.10702	7.9091	7.6199	7.06715	7.14947	6.83495	7.17793	7.07412	7.41344	7.14184	7.20425	7.26431	7.10003	7.04496	7.07179
CCNG2	6.16109	6.70811	5.97069	6.3616	6.60176	6.40957	5.98175	5.9765	6.36893	6.04064	6.71742	6.36299	6.34843	6.50908	6.71202	6.33803	6.42287	6.59923
CCNH	7.9423	7.62305	7.75295	7.82113	8.36174	8.0366	8.14018	8.05477	7.77302	7.7517	7.58449	7.58518	7.92647	7.77467	7.87681	7.64922	7.35392	7.36979
CCNI	10.841	10.858	10.8176	11.0263	10.9151	11.0344	10.7751	10.5881	10.6538	10.8609	10.8508	10.826	10.7067	10.6652	10.4779	10.5594	10.592	10.6207
CCNJ	4.64177	4.1259	4.03811	5.035	4.16696	4.88947	3.87608	4.85223	4.06668	4.22346	4.06012	4.36406	4.64743	3.94864	4.03417	4.95241	4.0975	4.40124
CCNK	5.9286	6.04768	5.35249	6.29827	4.96146	6.06333	5.83228	5.56908	6.06377	5.81759	6.3926	6.10003	6.03823	6.3109	5.99169	6.14793	6.22082	5.93995
CCNL1	7.05313	7.27894	7.67341	6.95104	6.97035	7.02103	7.18283	7.44712	7.76354	7.82852	7.63223	7.34554	7.86619	7.80604	8.24923	7.54786	7.2972	7.77087
CCNL2	5.83076	5.98657	5.87912	5.439	5.40821	5.79223	5.86344	5.42045	5.86537	5.36021	5.61368	4.82933	5.68967	5.87681	6.21084	5.88527	5.70485	5.52223
CCNO	4.71673	3.81045	3.65205	4.47187	2.25386	3.7453	3.27908	5.78713	4.58009	3.80381	4.28155	3.77981	3.6572	4.52384	3.58354	3.67842	4.31628	3.46795
CCNT1	5.53185	6.00209	6.0568	5.70627	6.45451	6.04258	5.73455	5.47172	5.71611	6.01457	5.79238	6.05822	5.92458	6.2073	6.18928	6.44714	5.88673	6.39584
CCNT2	4.85588	5.48834	4.93408	5.40933	6.18233	5.71567	5.47693	5.47172	5.25715	6.14043	5.34566	5.77821	6.00133	5.49214	5.97918	5.11243	5.92051	5.52223
CCNT2-AS1	1.22115	3.20625	0	2.18007	2.7343	2.5294	0	2.84732	3.26223	1.74734	2.89856	1.9778	1.41113	2.70069	2.5716	0.932009	1.6334	2.32943
CCNY	4.98279	5.27495	4.66835	5.60522	6.18233	5.10489	4.20279	5.06747	5.36136	5.36021	4.88726	5.43043	4.59886	5.11663	4.88603	5.07406	5.74311	5.11063
CCNYL1	3.16799	5.24917	4.8721	3.53547	1.52846	5.0643	4.10189	4.40183	1.95043	4.31173	4.53217	4.05954	3.6572	4.76183	5.30227	4.95241	5.17155	4.09628
CCP110	7.54987	7.56153	7.19262	7.36057	6.78552	7.48032	7.2314	7.10145	6.79829	7.70356	7.63892	7.52507	7.93139	7.51747	8.02719	8.00583	7.79738	8.17089
CCPG1	5.89672	5.59454	5.67643	5.11069	5.47086	5.81687	4.88801	4.92761	5.59308	6.01457	5.52975	5.77821	6.07421	5.71625	6.08805	5.92893	6.09335	6.26349
CCR1	2.93671	2.35466	3.79253	4.15185	3.62161	2.9416	1.80233	2.4976	1.95043	3.92071	2.22947	0.985236	3.45374	2.5394	1.67701	2.4698	3.52509	2.94675
CCR7	1.87289	0.753427	0	0.912987	2.25386	2.9416	4.10189	0	3.02896	2.18145	0	0	1.41113	2.5394	1.90575	2.87883	2.17122	2.51022
CCR8	3.36727	4.00786	3.4964	3.53547	3.82716	3.26183	3.74836	3.90134	1.95043	2.78523	3.06682	2.78195	3.08194	2.70069	2.5716	3.45776	3.43448	2.51022
CCRL2	3.69843	3.66203	4.5935	3.2971	4.67255	4.39561	3.87608	3.36386	2.75056	3.53708	4.64284	3.55778	4.06736	3.40966	3.82638	4.03868	3.69084	3.06714
CCS	5.09943	5.78601	5.48263	6.05175	6.18233	5.88836	6.00987	5.42045	5.82948	5.93342	6.03492	5.77821	5.54334	5.35343	5.01419	5.22177	5.64549	5.36669
CCSAP	4.29562	4.8974	4.93408	4.99562	4.31091	4.4596	4.38561	4.68854	4.491	3.53708	4.34841	4.61537	5.16384	4.18515	4.08175	4.18988	4.31628	3.9784
CCSER2	5.09943	5.02443	4.93408	4.82635	5.12624	4.97953	5.21231	5.94056	5.41078	4.68665	4.58857	4.77874	5.38047	4.83317	5.71821	5.11243	5.27961	5.60412
CCT2	10.3609	10.2441	10.2403	10.1537	10.9389	10.2208	10.0322	10.1484	10.0097	9.95461	10.2066	10.3573	10.4191	10.1632	10.3985	10.2325	9.94492	10.1253
CCT3	10.2198	10.274	9.99331	10.0697	10.4311	10.0879	10.3928	10.3891	10.327	9.91992	10.0025	9.81113	10.1157	9.99836	10.1095	9.97583	9.8517	9.60368
CCT4	10.1387	10.2644	10.1403	9.9408	10.6884	10.0955	10.3061	10.1484	10.251	9.68603	9.99862	9.98576	9.92572	9.85253	10.1174	9.6937	9.60659	9.71037
CCT5	10.5119	10.3064	10.29	10.4653	10.8489	10.4915	10.6127	10.5646	10.5501	10.251	10.4741	10.3892	10.381	10.1597	10.352	10.2315	10.0902	10.0432
CCT6A	9.56958	9.46911	9.42534	9.37523	9.71702	9.2093	9.41765	9.35478	9.23855	9.46805	9.46671	9.54211	9.31041	9.16269	9.41883	9.18956	9.1081	9.20984
CCT6B	4.08542	4.00786	4.66835	3.2971	5.12624	3.39871	4.38561	4.59916	3.26223	3.92071	3.79843	2.29823	4.38636	3.50011	3.44485	4.18988	4.0975	4.30657
CCT6P1	5.09943	5.14117	5.1584	4.68495	4.96146	4.74286	5.43606	5.42045	5.20207	4.39492	4.88726	4.77874	5.80121	5.32896	5.87499	5.69611	4.82434	5.60412
CCT6P3	5.15439	5.48834	4.99352	4.82635	5.2741	4.32864	4.7614	4.92761	4.58009	5.03672	5.17198	5.3286	5.86421	5.75351	5.79159	5.32341	5.08483	5.16561
CCT7	9.41779	9.69718	9.52689	9.40184	10.2665	9.63359	9.74283	9.72065	9.71249	9.29206	9.37549	9.15772	9.48594	9.45189	9.27783	9.28923	9.25764	9.3647
CCT8	9.53375	9.28153	9.28074	9.28826	9.54205	9.26409	9.48682	9.52218	9.50915	9.2169	9.29304	9.06841	9.26249	9.27103	9.40253	9.22063	9.15141	9.22448
CCZ1	7.41006	7.63305	7.77004	7.80414	8.01801	7.77257	7.42135	7.35457	7.34754	7.59341	7.27651	7.43809	7.68027	7.7003	8.01498	7.40833	7.54469	7.60675
CCZ1B	6.99408	7.29163	7.24246	7.60916	7.36612	7.50328	6.80359	7.13364	7.21473	7.45489	6.49942	6.99292	6.95186	7.44531	7.46606	7.00124	7.21792	7.26669
CD151	1.87289	0	0	1.86743	3.38183	3.39871	1.80233	3.12858	2.75056	3.01296	1.9135	1.9778	2.76725	3.74174	2.27675	1.89677	3.00146	2.32943
CD163L1	8.21862	7.79773	8.14244	7.54921	8.83642	8.24162	8.45343	8.19101	8.55024	7.25788	7.47655	7.797	7.66855	7.91281	8.13826	7.71927	7.78826	7.48234
CD164	8.0693	8.0905	7.77852	8.03049	8.67283	8.10823	7.90587	8.02933	7.76354	7.61091	7.57754	7.84696	7.97486	7.96138	8.0632	7.85558	7.46682	8.02985
CD180	2.66114	1.90426	2.28008	3.2971	3.09409	2.9416	2.57909	3.12858	3.26223	2.5147	2.70806	3.87921	1.41113	0.755007	2.81629	0.932009	2.86934	2.51022
CD19	7.34066	7.69644	7.84456	7.81549	8.00748	7.89334	8.07513	7.79785	7.9082	7.7517	7.6255	7.62868	7.50684	7.63692	7.31497	7.44638	7.3845	7.222
CD1D	4.78798	4.28661	2.89306	4.63456	4.96146	5.22022	3.87608	5.25473	4.88991	4.22346	4.21145	4.67191	4.26708	3.74174	3.29139	4.51035	4.63387	3.91563
CD200	4.39025	3.81045	4.5935	3.01141	5.20206	4.9352	4.29709	4.29203	3.46298	4.75121	4.21145	4.21982	3.91699	4.60761	3.64819	4.56671	4.55004	4.35468
CD22	7.19096	7.36549	7.57956	7.09775	5.20206	6.64796	7.14529	7.28462	7.63428	6.97661	6.32781	6.58534	6.61586	6.39582	6.6581	6.07208	6.35038	5.9241
CD24	11.1692	11.2126	11.2572	11.3233	11.7334	11.5185	10.9631	11.1139	11.1338	11.2794	11.3414	11.3372	10.7188	10.5932	10.4085	10.9065	10.83	10.8619
CD247	2.32019	1.90426	0	0	0	2.26863	1.80233	3.74343	4.29438	2.5147	0.942911	0.985236	1.80289	2.84574	3.02544	1.49358	0	1.88129
CD27	0	0.753427	0	1.86743	3.09409	0.96692	0	0	0	1.74734	2.22947	0.985236	0.871627	0	0	0	1.92723	2.32943
CD2AP	7.00907	6.97515	6.91371	6.97148	6.54465	6.62023	6.52051	6.52982	6.70233	7.24672	7.25053	7.2279	7.6146	7.38129	7.26945	7.43885	7.36009	7.55106
CD2BP2	6.53701	6.86063	6.69843	7.17911	7.05458	6.7281	7.10675	6.7114	7.20075	6.59208	7.17886	6.47844	7.12479	6.4192	6.71956	6.4168	7.1905	6.91217
CD302	4.08542	2.97415	2.61888	2.43688	3.38183	2.75017	3.87608	2.4976	1.95043	3.38261	3.47851	2.97406	3.55906	2.97754	3.20807	2.87883	3.76708	3.17825
CD320	7.09587	6.7638	7.26676	7.30527	7.33277	7.38467	7.32391	7.01769	7.20075	6.75838	7.2679	6.95924	6.89265	7.01012	6.71202	6.78073	7.3845	6.88785
CD37	5.79661	5.51022	5.48263	5.5245	4.96146	5.74164	5.43606	5.61541	5.41078	5.65836	5.81619	5.01562	5.09546	4.64774	3.51586	4.4517	5.08483	4.53252
CD38	9.38656	9.28946	9.37873	9.44451	9.57451	9.43101	9.52386	9.23379	9.50061	9.50362	9.38149	9.36053	9.35679	9.36128	9.38959	9.46817	9.48205	9.41236
CD3EAP	4.71673	4.8974	4.8721	5.28416	3.38183	4.97953	5.394	5.06747	5.54962	5.40103	4.64284	5.10046	3.55906	5.11663	3.76939	4.4517	5.22659	5.43541
CD4	1.22115	3.66203	3.3219	2.65481	3.38183	1.95009	3.27908	0	2.75056	3.01296	3.35389	2.78195	1.41113	1.90711	0	1.49358	3.12249	3.06714
CD40	3.69843	3.81045	3.79253	4.15185	4.87144	4.52088	5.62972	5.31211	4.81846	3.80381	4.47348	4.14191	6.47494	6.45356	6.4742	5.11243	5.47412	5.9241
CD44	0	0	0	0	0	0	0	0	0	0	0	0	0	0	0	0	0	0
CD46	6.8009	5.57392	6.50777	6.60349	6.90378	6.27376	5.394	5.47172	6.03254	6.27827	5.95137	6.43009	6.36305	6.19382	6.67372	6.43205	6.35038	6.18583
CD47	8.90772	8.87887	8.90471	8.89756	9.56736	8.99118	8.97596	9.11386	8.97667	8.67119	8.71028	8.69149	8.75641	8.87008	9.13005	8.88607	8.44834	8.48102
CD48	5.83076	6.42691	6.89825	6.40734	6.78552	6.29145	6.46064	6.48061	6.34371	5.36021	5.71849	5.97079	5.98252	6.34791	6.39164	5.90726	6.22082	5.08234
CD52	7.7505	7.22044	7.43698	7.63502	8.63229	7.75991	7.20732	8.23618	7.72499	7.41559	7.02388	7.4217	7.03636	7.53362	7.45255	6.47686	7.34773	7.45502
CD53	8.52009	8.49053	8.30961	8.5282	8.80028	8.56623	8.70205	8.67393	8.80711	8.49858	8.25016	8.56285	8.15363	8.10161	8.01805	8.01092	8.11071	8.08793
CD55	7.48702	7.58749	8.05448	7.3683	8.03884	7.43329	7.83691	7.83747	7.28266	7.69538	7.10345	7.36282	7.98906	7.82366	8.25961	7.63611	7.71797	7.72586
CD58	5.9286	5.27495	6.02867	6.14471	6.76066	5.51945	6.55908	7.16513	6.76067	5.81759	5.9297	5.75222	6.09186	6.32335	6.54382	5.41835	5.88673	5.50101
CD59	6.40724	6.30707	6.31156	6.29827	7.39871	6.98886	6.06452	6.834	6.62068	6.36335	6.7425	6.57054	6.17705	6.32335	6.2426	6.44714	6.06342	6.50645
CD63	7.98841	7.94953	7.83647	8.06419	9.18367	8.36789	8.51849	8.47474	8.4415	8.10662	7.88394	8.33235	8.06254	7.87949	8.15504	7.88358	7.68395	7.77971
CD69	9.47559	9.42805	9.10999	9.52625	9.96024	9.77706	10.0459	9.68308	9.63923	9.65261	9.22128	9.59058	9.32355	9.18672	9.71038	9.2272	8.74785	8.80917
CD70	1.22115	2.14697	1.19263	3.53547	4.67255	2.26863	6.46064	4.50386	5.7549	2.18145	2.70806	3.77981	5.94416	6.02127	6.2426	5.32341	5.35566	5.64338
CD72	5.25841	4.56262	4.99352	4.63456	5.0462	4.63614	5.51667	4.99923	5.08518	4.75121	4.93154	4.61537	4.20353	4.93398	4.62203	4.62095	3.69084	4.53252
CD74	12.2277	12.2054	12.3123	12.3603	11.4657	12.4035	12.3431	12.2102	12.3385	12.2692	12.3383	12.3837	11.9147	11.7045	11.3951	11.8841	11.9938	11.8219
CD79A	7.99596	7.82417	7.59882	8.18291	7.663	8.23706	7.78089	8.02933	7.73472	7.82102	7.71055	7.80965	7.42562	7.24406	7.29492	7.45387	7.44957	7.222
CD79B	11.6228	11.7538	11.8126	11.3577	12.1272	11.4915	12.0751	11.9555	11.9467	11.3364	11.441	11.3691	11.2035	11.097	11.0024	10.7288	10.9901	10.7432
CD81	9.67672	9.99156	9.76295	9.80357	9.33449	9.75651	9.58121	9.51304	9.75377	9.57671	9.61663	9.60335	9.35496	9.49377	9.25206	9.28923	9.83519	9.4585
CD82	0	1.61229	2.28008	0	2.7343	0.96692	2.24237	2.84732	3.02896	2.18145	0	0.985236	1.41113	1.90711	2.10315	3.19714	2.86934	3.3777
CD83	5.20734	5.42066	5.6397	5.21725	6.18233	5.63482	5.25992	5.31211	5.67626	5.69165	4.7944	5.39728	7.06346	6.87297	7.1122	6.70742	7.06019	7.2155
CD84	3.36727	5.24917	5.1584	4.28849	1.52846	3.84451	4.38561	4.40183	4.664	3.92071	4.28155	4.36406	4.59886	4.34013	4.33838	3.9567	3.43448	4.20525
CD9	10.0884	9.99448	9.97868	9.9067	11.034	10.4645	10.1074	10.24	10.169	10.0183	10.2055	10.0051	9.46237	9.46458	9.61049	9.47555	9.67498	9.56841
CD96	5.72579	5.37371	5.7472	5.46806	6.06539	6.04258	6.16798	4.59916	5.67626	6.18786	5.13459	5.925	5.54334	5.89359	5.39936	5.64467	5.02399	5.38996
CD99	8.30617	8.34902	8.60941	8.57905	9.00467	8.85207	8.46363	8.47474	8.53917	8.65441	8.57026	8.68807	8.3388	8.33764	8.14107	8.59571	8.50231	8.21716
CD99L2	4.98279	4.7581	4.8721	4.63456	5.12624	4.4596	3.74836	3.90134	4.39604	4.12943	4.69515	4.05954	4.32795	4.99746	3.51586	4.18988	5.60452	4.30657
CD99P1	0	0.753427	2.89306	3.73997	2.25386	2.75017	1.80233	2.4976	2.40527	2.5147	3.06682	1.9778	2.57975	4.12956	3.64819	2.68876	3.43448	3.17825
CDADC1	4.71673	2.97415	3.65205	4.73364	4.44179	4.18459	4.20279	5.19497	4.491	3.80381	4.84157	4.29375	5.09546	4.23868	4.41469	4.4517	5.02399	4.57376
CDAN1	3.36727	3.73815	2.89306	3.2971	1.52846	3.7453	3.60824	3.74343	3.02896	3.6766	3.47851	4.77874	3.83548	4.18515	3.64819	3.04674	4.50622	4.03854
CDC123	9.33099	9.41796	9.55182	9.29436	10.0579	9.56251	9.73864	9.61631	9.59983	9.33746	9.41891	9.44407	9.3677	9.31841	9.39431	9.0132	9.27733	9.10299
CDC14A	3.96759	2.97415	4.8721	3.73997	2.7343	4.10679	4.38561	4.40183	4.29438	4.12943	4.7944	4.43111	5.54334	5.11663	4.85897	4.62095	4.67403	5.24434
CDC16	7.34066	6.88595	6.83467	6.76446	7.34954	6.80401	7.18283	7.58154	6.98931	7.20123	6.93966	7.15044	6.56619	6.72139	6.9292	6.93855	6.69095	6.55873
CDC20	8.00346	7.9929	7.83647	7.90855	7.63592	8.02078	8.02089	7.82767	7.81032	7.69538	8.0488	7.84696	6.92256	6.92288	7.03573	7.03159	7.07526	6.85478
CDC23	5.79661	6.06255	5.97069	6.05175	6.32483	6.06333	5.92381	6.62346	5.41078	5.81759	6.09456	6.25611	6.5016	6.93914	6.65023	6.73227	5.86954	6.62888
CDC25A	6.47358	6.47219	6.28801	6.75269	5.74884	6.08378	6.24097	6.774	6.1536	6.27827	5.9077	6.03686	7.35426	7.81488	7.53606	7.27936	7.50071	7.44949
CDC25B	9.35758	9.3843	9.03771	9.28214	8.36998	9.14263	9.3642	9.46956	9.33769	9.23112	9.26086	9.02837	9.16576	9.16442	8.79919	9.08731	9.49472	8.99519
CDC25C	5.72579	5.78601	6.26408	5.1826	6.78552	6.08378	5.92381	5.78713	6.00062	5.13677	5.37802	5.58564	6.12654	6.13856	6.5774	5.92893	6.16555	5.80794
CDC26	7.77701	7.66265	7.81192	7.98093	8.54762	8.11321	8.1274	8.04634	8.02388	7.62821	7.66538	7.64995	7.60848	7.51747	7.72024	7.12839	7.37844	7.29779
CDC27	7.16442	7.23365	7.3487	7.36057	7.01308	7.46482	6.78743	7.10145	7.3348	7.08078	7.03407	7.03663	7.34693	7.49014	7.61904	7.17446	6.92528	7.14201
CDC34	6.47358	6.55869	6.0568	6.08966	6.0242	6.08378	6.00987	6.11192	6.18234	5.78712	6.31114	5.72576	6.34843	6.27292	6.02859	6.25471	6.52521	6.21218
CDC37	7.76823	7.74336	7.55017	7.85454	6.68339	7.98317	7.95008	8.09619	7.8195	7.71979	7.8206	7.64289	7.68027	7.67139	7.71648	7.46132	7.92766	7.85272
CDC37L1	4.19434	3.73815	3.4964	3.73997	3.09409	4.25841	3.45303	4.29203	3.63918	4.22346	3.59321	4.21982	3.6572	2.84574	4.55617	4.51035	3.97426	5.05348
CDC37L1-AS1	3.96759	3.40614	3.12336	3.64134	5.2741	3.93734	2.85191	4.92761	3.46298	3.6766	3.35389	4.43111	3.55906	4.34013	3.29139	4.11626	3.23415	3.46795
CDC40	6.74827	7.11018	7.38244	7.2972	7.07489	7.0316	7.06715	7.14947	6.64153	7.11798	6.91782	7.15044	7.21618	7.31431	7.40658	7.46132	6.57908	7.26039
CDC42	9.00813	9.25748	9.29262	8.93187	10.0006	9.19292	9.38044	9.34794	9.4002	8.84396	8.96318	9.02566	9.0576	9.02664	9.20045	8.77684	8.64046	8.77863
CDC42BPB	0	0	0	1.86743	1.52846	0.96692	0	0	0	1.12347	0	2.56027	0	1.90711	0	0	1.26401	0
CDC42EP2	1.22115	0	2.89306	2.43688	0	1.54069	1.16601	1.35002	0	1.74734	1.9135	1.56524	1.41113	2.35779	2.4317	1.49358	2.72388	2.67086
CDC42EP3	5.30774	5.19618	4.34236	5.46806	4.87144	5.10489	5.0044	4.50386	5.25715	5.31821	5.01622	4.72632	5.26069	5.55679	5.34189	5.07406	4.55004	5.02403
CDC42P3	3.16799	3.20625	3.4964	3.4212	3.82716	3.39871	4.10189	3.56609	3.26223	1.74734	3.35389	2.97406	3.55906	3.09829	3.11964	1.89677	2.5621	2.12269
CDC42SE1	7.46544	7.02917	7.44764	7.80414	7.86312	7.90488	7.78089	7.48504	7.4923	7.43538	7.28507	7.24664	7.3247	7.26356	6.95498	7.66866	7.64407	7.66991
CDC42SE2	8.00346	8.08687	7.89219	8.0784	8.68609	8.17646	8.11451	7.98591	7.53749	8.08173	7.93921	8.03652	7.99377	8.07611	8.28778	7.93801	8.1504	7.73042
CDC45	5.95979	6.17637	6.02867	6.05175	6.97035	5.48911	6.66898	6.32205	6.39372	5.81759	5.95137	5.82882	6.48833	6.98685	6.80711	6.97024	6.60008	6.4522
CDC5L	8.33024	8.70723	8.63763	8.3007	8.10946	8.49167	8.46363	8.39067	8.55574	8.74042	8.57026	8.64282	8.89864	8.71818	8.96697	8.51565	8.50509	8.69934
CDC6	5.99033	6.52686	6.75104	6.18027	5.34271	6.37679	5.394	6.23571	6.26528	6.69414	6.36057	6.10003	7.68027	7.7837	7.98401	7.58245	7.42625	7.55106
CDC7	6.3377	6.90258	6.68046	6.34603	7.05458	6.85249	6.46064	6.45537	6.72204	6.36335	6.4546	6.76501	7.09006	7.03303	7.21181	6.81603	6.88308	7.01305
CDC73	6.71209	6.89429	6.54797	6.07083	6.68339	6.56311	6.81956	6.60062	6.79829	6.6269	6.97182	7.26513	6.8621	6.75851	7.36871	7.03159	6.64118	6.82093
CDCA2	7.38729	7.35947	7.45823	6.9303	5.2741	7.0316	7.34614	7.19594	7.05295	7.22415	7.25924	7.04736	7.51341	7.57062	7.85985	7.22786	7.30361	7.50384
CDCA3	7.9423	8.01983	7.80364	7.85454	7.663	8.16691	8.45343	8.25093	7.95892	8.06278	7.75435	7.8222	8.1153	8.13728	7.88689	7.5618	7.65916	7.73042
CDCA4	5.09943	6.2562	6.16416	5.28416	5.89308	5.88836	5.62972	5.56908	5.41078	5.13677	5.71849	6.34572	6.16041	6.36004	6.50943	6.52031	6.26092	5.90806
CDCA5	7.88658	7.7341	7.54024	7.90855	8.2411	7.46482	7.28991	7.7045	7.43374	7.57569	7.47655	7.03663	8.22338	8.50536	8.38819	8.29153	8.32449	8.38872
CDCA7	8.65961	8.65419	8.56112	8.40209	8.79417	8.59857	8.53794	8.19101	8.50545	8.61591	8.53123	8.51729	8.57997	8.46943	8.57852	8.5821	8.59935	8.42578
CDCA7L	7.76823	7.92938	8.14244	8.20034	8.15787	8.11321	7.30134	7.98591	7.32194	8.44591	8.48741	8.54783	8.03542	7.45665	7.574	8.33274	8.02791	8.00745
CDCA8	7.7052	7.9415	7.43698	7.79269	7.39871	7.74072	7.76448	8.05477	7.55957	7.65377	7.74197	7.25591	7.6919	7.66652	7.53179	7.49075	7.57682	7.63625
CDH4	1.22115	0.753427	1.19263	3.64134	1.52846	2.9416	0	0	0	3.53708	3.06682	2.56027	0	1.90711	0.631718	2.4698	3.00146	3.85002
CDHR3	5.65131	4.43121	4.43102	3.73997	3.82716	3.26183	4.29709	4.40183	4.88991	4.12943	5.20843	4.55653	4.32795	4.68678	5.28204	3.33332	4.21103	4.30657
CDIPT	6.26464	6.29452	6.13806	6.70465	6.57348	6.53368	6.26451	6.42967	6.23816	6.18786	6.05508	6.43009	6.20976	6.29835	6.2426	6.65639	6.44625	6.17247
CDK1	8.13226	8.26145	8.34996	7.99098	8.73796	8.20007	8.30245	8.10434	8.33673	7.92962	7.96073	8.06846	8.38965	8.52704	8.91044	8.1138	8.23337	8.09503
CDK10	4.08542	5.14117	4.34236	4.58234	3.62161	4.39561	4.469	5.19497	4.7433	3.92071	4.34841	3.14357	4.90883	4.48006	3.82638	4.25992	4.59256	4.40124
CDK11A	8.03309	7.88821	8.12925	7.94519	6.10543	7.6199	7.94281	8.07976	7.9082	8.24757	7.93378	8.10485	8.10664	8.19259	7.87005	7.9219	8.09231	8.05918
CDK11B	7.35246	7.29163	7.55017	7.45797	5.69736	7.32579	7.3896	7.79785	7.36018	8.07544	7.65881	7.93622	7.93628	7.8837	7.46157	7.45387	7.54469	7.87351
CDK12	6.13399	6.56915	6.48724	6.71681	3.82716	6.68859	5.51667	6.34972	6.23816	6.64401	6.34428	6.16055	6.44777	6.34791	6.35338	6.49149	6.5142	6.50645
CDK13	7.02391	6.61024	6.69843	6.12659	5.0462	5.45811	6.39818	6.42967	6.59952	6.93553	6.57115	6.39693	6.72172	6.552	6.65023	6.85049	6.95002	6.896
CDK14	5.15439	5.08398	5.39719	5.37904	5.2741	4.32864	4.7614	4.99923	5.14481	5.78712	5.61368	5.25649	5.64252	5.14494	5.73319	5.44866	5.30541	5.77296
CDK16	4.85588	5.05451	4.73951	4.58234	0	3.84451	5.35068	5.19497	5.54962	4.98396	5.24398	4.29375	5.38047	5.11663	4.65386	4.72367	4.31628	4.61384
CDK17	4.92073	5.37371	4.80733	5.91066	5.84658	5.57829	4.88801	5.13263	4.7433	5.51698	5.27867	5.18058	5.40893	6.03646	5.86142	5.29032	5.60452	5.87546
CDK18	2.66114	2.35466	2.61888	2.8441	2.25386	2.26863	1.80233	3.12858	3.02896	2.18145	1.50833	1.9778	0	1.61491	1.90575	2.21155	2.17122	2.12269
CDK19	4.85588	5.82143	5.35249	4.91347	4.31091	5.8411	5.05925	5.42045	5.45856	6.18786	5.83962	5.80374	5.29158	5.49214	5.68778	5.95027	6.4919	6.32515
CDK2	7.49768	7.67723	7.57956	7.80983	8.4105	7.77257	7.28991	7.54611	7.24229	7.39553	7.21514	7.25591	7.82982	7.7003	8.00576	8.08514	7.80644	7.83587
CDK20	2.93671	2.97415	1.83648	0	2.25386	1.95009	2.57909	3.74343	1.95043	2.5147	2.48852	0.985236	2.93316	2.35779	2.5716	0.932009	3.23415	2.12269
CDK2AP1	8.42829	8.48225	8.52633	8.68808	8.73796	8.66454	8.02089	8.21377	8.47673	8.27528	8.598	8.56285	8.42491	8.53241	8.35469	8.61922	8.60715	8.62283
CDK2AP2	8.33024	8.31525	8.15551	8.50385	8.48069	8.7974	8.58075	8.57191	8.63585	8.59408	8.40736	8.55911	8.22738	8.19259	8.02719	7.96447	8.23337	8.22041
CDK3	2.32019	3.58167	2.28008	2.18007	2.7343	2.75017	2.24237	2.4976	3.02896	1.12347	0.942911	0.985236	2.36419	3.20972	3.02544	0.932009	2.17122	1.88129
CDK4	9.38943	9.30518	9.49383	9.41682	10.1964	9.71778	9.38044	9.30265	9.31516	9.2226	9.34102	9.33669	9.26249	9.25812	9.15807	9.08007	9.29996	9.22933
CDK5	6.36126	6.42691	6.33472	6.18027	6.57348	6.02153	6.57799	6.62346	6.72204	6.18786	5.99375	5.49453	6.40603	6.24703	6.12259	4.90947	5.02399	5.70035
CDK5RAP1	5.15439	5.97088	5.7472	5.439	5.53091	5.57829	5.59301	6.14388	6.26528	5.69165	5.58624	5.69881	5.73533	6.33568	5.81993	5.92893	6.35038	6.33718
CDK5RAP2	6.96363	7.12443	6.68046	6.8331	5.0462	6.1628	7.14529	7.00034	6.7796	7.09329	7.07412	6.68485	7.81395	7.12829	7.34453	7.2624	7.39054	7.29779
CDK5RAP3	6.47358	6.86063	7.04593	6.55011	5.89308	6.39327	6.73785	6.87266	7.32194	6.36335	6.29429	6.34572	6.48833	6.34791	6.15632	6.14793	6.89162	6.54842
CDK6	7.51878	7.54573	7.08743	7.76953	7.24587	7.8221	6.63327	6.62346	6.51166	7.61959	7.65881	7.2279	7.15029	7.0481	7.04776	7.82124	7.83771	7.85272
CDK7	6.4297	5.78601	6.37997	5.82337	6.51522	6.02153	6.11718	6.01157	6.34371	6.51979	5.95137	6.38006	6.62801	6.66385	6.764	6.09142	6.15139	6.28847
CDK8	4.92073	5.7497	4.73951	5.77767	5.64398	5.0643	4.88801	4.68854	4.491	5.03672	5.05676	5.14108	5.06002	6.06638	5.87499	5.86294	5.08483	5.29453
CDK9	7.7052	8.12635	7.55017	7.79843	6.83399	7.53333	7.26679	7.47251	7.40963	7.62821	7.22407	7.59252	7.16705	7.49014	7.35425	7.36925	7.67903	7.26669
CDKAL1	5.86411	6.26909	5.5633	6.19773	5.84658	5.95649	5.92381	5.47172	5.08518	5.87667	6.15183	5.77821	6.25748	5.85982	6.56071	6.5625	6.29994	6.11776
CDKL1	2.66114	1.90426	3.65205	0	1.52846	0.96692	1.80233	0	2.40527	0	2.89856	0	2.36419	0.755007	2.81629	1.89677	2.37986	1.88129
CDKL3	4.92073	4.18148	4.03811	4.28849	5.34271	4.10679	4.54784	4.85223	4.81846	4.47356	3.47851	4.05954	4.49652	5.25295	4.91259	4.62095	3.00146	3.78127
CDKL5	1.87289	0	0	2.18007	0	1.54069	0	0	2.75056	1.74734	2.89856	1.9778	1.80289	1.90711	1.06958	0.932009	3.00146	2.12269
CDKN1A	0	3.20625	2.61888	4.52817	2.7343	0.96692	5.70045	4.29203	5.20207	1.74734	2.89856	3.14357	6.00133	6.552	6.11117	5.86294	6.26092	5.82512
CDKN1B	7.35246	7.37147	7.24246	7.30527	7.17236	7.60582	7.17042	7.32699	6.93967	7.72783	7.59829	7.31923	7.63281	7.63692	7.56983	7.49075	7.45534	7.34023
CDKN1C	4.98279	5.11286	3.4964	4.47187	5.20206	4.79341	3.99339	4.59916	4.81846	4.61906	5.34566	4.92548	4.59886	5.17271	4.37703	3.45776	4.78821	4.72783
CDKN2A	9.69538	9.56497	9.65205	9.70323	10.4113	9.93454	9.85366	9.86904	9.73692	9.75259	9.67964	9.5459	9.78491	9.58055	9.75875	9.53503	9.54702	9.48171
CDKN2AIP	6.76603	6.87756	6.58708	7.2972	6.9485	6.94482	6.50083	6.73257	6.55626	7.44517	7.00328	6.80347	7.49362	7.54429	7.85985	7.75609	7.31	7.29779
CDKN2AIPNL	6.65606	6.7819	6.0568	6.12659	7.19109	6.70188	6.16798	7.06853	7.05295	6.51979	6.31114	6.55559	6.30368	6.37207	6.49192	6.07208	5.85214	6.27603
CDKN2B-AS1	2.93671	3.20625	3.12336	3.16132	0	3.39871	0	3.74343	3.26223	0	3.06682	1.9778	3.55906	4.76183	3.98496	2.68876	3.76708	3.28142
CDKN2C	9.83861	9.80286	9.77358	10.0067	10.173	9.93875	9.56945	9.6993	9.64698	9.60973	9.5148	9.50174	9.79842	9.78891	9.89902	9.77519	9.79365	9.64174
CDKN2D	6.10638	6.55869	6.02867	5.8007	6.92631	6.53368	5.59301	6.11192	5.93458	6.211	6.25997	6.21864	6.46142	6.89814	6.56071	6.07208	6.37495	6.3008
CDKN3	8.21215	7.88821	7.98296	7.90855	8.59761	8.44105	8.47376	8.59522	8.29128	7.85813	7.71689	7.88333	8.47623	8.68723	8.79741	8.04603	7.62371	7.69815
CDPF1	5.09943	4.52013	5.0506	5.97283	5.2741	4.32864	5.0044	4.77271	4.58009	4.98396	5.47096	4.77874	4.82685	4.86756	5.17641	4.72367	4.46103	4.96326
CDR2	5.72579	5.65469	5.67643	5.439	4.56178	4.79341	5.66552	4.68854	5.20207	5.27494	5.37802	5.10046	4.82685	5.27874	5.10911	5.92893	4.82434	5.45761
CDS2	6.13399	6.26909	5.71225	6.23203	6.73536	6.3262	6.03745	5.66029	6.21052	6.06624	5.9297	6.10003	6.20976	6.26003	6.46526	6.49149	6.43461	6.32515
CDT1	6.90072	7.08853	7.27875	7.53554	4.96146	7.2998	7.14529	7.18062	7.4923	6.94935	7.07412	6.72548	8.04905	8.27496	7.78276	7.68148	8.14683	7.96158
CDV3	7.84542	7.96941	7.82833	8.00096	7.24587	7.85221	7.80516	7.88552	7.6753	8.17294	8.18306	8.19442	7.7871	7.68592	7.46606	8.1138	7.90675	8.02242
CDYL	5.72579	5.80383	6.26408	5.88933	6.48518	6.27376	5.86344	5.42045	5.5048	6.211	6.15183	6.34572	6.14358	5.35343	5.60877	6.07208	5.78037	5.95563
CEACAM21	2.66114	1.24585	1.19263	2.18007	1.52846	2.5294	0	2.4976	0	1.74734	0.942911	2.29823	2.11066	2.35779	1.40503	2.21155	3.00146	2.81539
CEBPB	3.83928	2.97415	3.4964	3.73997	5.20206	3.7453	3.74836	3.36386	4.491	3.38261	3.79843	4.14191	6.0199	6.64415	6.12259	5.95027	5.92051	6.15898
CEBPG	8.68783	8.49053	8.59988	8.55555	8.87747	8.75339	8.76115	8.74858	8.83905	8.50327	8.88652	8.76155	9.50088	9.49927	9.64357	9.56646	9.3612	9.40952
CEBPZ	9.00439	8.66885	8.51116	8.64736	8.80028	8.8932	8.79387	8.76921	8.78385	9.07277	9.10526	9.18712	9.10184	8.95848	9.20045	9.03083	8.89739	9.09946
CEBPZOS	7.86202	7.92124	7.93829	7.58282	7.44626	7.53333	7.53215	8.01212	8.06304	7.49315	7.55649	7.70517	7.65079	7.62691	7.89691	7.46873	6.99034	7.35804
CECR1	4.85588	4.72106	5.0506	4.95513	5.2741	5.36092	3.74836	4.77271	5.59308	4.81301	5.31255	4.87821	4.26708	5.14494	4.48716	4.90947	4.75114	5.11063
CECR2	4.08542	4.23501	3.65205	5.07334	3.62161	4.32864	3.74836	2.84732	3.93776	5.47935	5.13459	5.25649	4.13705	4.90115	4.65386	4.81956	5.27961	5.85887
CECR5	6.16109	6.13473	5.44054	5.75426	5.69736	5.74164	6.16798	6.20575	5.71611	5.5894	5.69299	5.36335	5.16384	5.82525	5.74801	4.86522	6.07846	5.29453
CECR7	3.54233	2.53619	4.03811	3.01141	3.09409	3.26183	3.60824	3.12858	1.95043	2.18145	2.48852	3.55778	3.83548	3.20972	3.20807	3.04674	2.72388	3.70909
CELF1	7.57022	8.19548	7.68246	8.05464	6.65669	7.30852	7.58918	7.40818	7.64465	7.5487	7.63223	7.71193	7.33955	7.79714	7.39249	7.9219	8.32134	8.08437
CELF2	7.72349	8.09413	7.94583	8.36006	6.92631	8.05225	7.53215	7.59317	7.61333	7.9504	7.90075	8.19442	7.58996	7.90869	7.69368	8.03609	8.00054	8.04825
CELF3	1.87289	0	0	0.912987	2.25386	0	1.80233	1.35002	1.95043	1.12347	1.50833	0.985236	1.80289	0	0	0	0.766223	0
CELSR1	1.87289	3.40614	2.61888	0.912987	0	2.26863	1.80233	0	0	1.74734	2.22947	2.78195	1.80289	1.2481	1.67701	2.4698	1.92723	1.88129
CELSR2	2.32019	2.35466	2.61888	3.73997	0	0.96692	1.80233	3.12858	1.95043	2.18145	2.70806	2.78195	4.06736	2.5394	1.40503	2.4698	1.26401	4.09628
CEMIP	4.08542	3.20625	4.43102	4.82635	3.82716	4.57966	3.27908	4.50386	1.28241	4.02884	3.59321	4.05954	3.6572	4.12956	3.58354	4.4517	4.55004	4.93189
CEND1	2.93671	1.61229	2.61888	3.73997	0	3.52372	3.60824	3.90134	4.06668	2.78523	3.21748	2.56027	1.80289	2.97754	2.4317	3.19714	3.61034	2.81539
CENPA	7.12369	7.49179	7.24246	7.01152	7.3158	6.64796	7.10675	7.22611	6.98931	6.67762	6.54288	7.01494	6.68729	6.73076	7.35425	6.49149	6.61046	6.53805
CENPB	5.30774	5.59454	5.39719	6.26553	5.58855	6.37679	5.70045	5.61541	5.79267	6.16434	5.83962	5.69881	5.66629	5.6585	5.43644	5.76998	6.24768	6.06089
CENPBD1	3.69843	4.23501	2.89306	4.28849	4.44179	5.0643	4.82609	4.17318	3.46298	4.22346	4.21145	4.14191	3.99413	3.40966	4.37703	3.77726	4.26462	4.09628
CENPBD1P1	2.66114	4.47635	3.12336	4.28849	4.00704	4.18459	4.10189	4.40183	3.93776	3.92071	3.79843	4.61537	4.13705	4.18515	4.29865	3.86977	4.15538	3.78127
CENPC	7.71437	7.58749	7.53024	7.37599	6.60176	7.84624	7.63504	7.61613	7.3727	7.90145	7.79686	8.10998	8.00313	7.8497	8.03628	7.91649	7.66913	7.72586
CENPE	8.72462	8.59912	8.57578	7.59605	4.96146	7.09341	8.3691	8.50582	8.39928	8.61157	8.45364	7.90118	8.73971	8.00065	8.51494	8.13259	7.80192	8.14376
CENPF	10.1505	10.1127	10.0114	9.54	6.78552	8.64403	9.84588	9.86425	9.817	10.551	10.2323	9.9647	9.99304	9.49515	9.63263	9.47371	9.64751	9.81725
CENPH	7.03859	7.54573	7.58922	7.4287	7.5369	7.3764	7.14529	7.9043	7.22857	7.45489	7.33537	7.12028	7.82455	7.73331	8.13545	7.87245	7.7465	7.67466
CENPI	4.08542	4.33644	5.0506	4.63456	4.00704	5.86492	5.1121	5.19497	5.93458	4.31173	4.64284	4.82933	5.29158	5.2267	5.45463	4.51035	5.02399	5.13838
CENPJ	6.78357	6.36823	6.52801	5.60522	4.87144	5.76716	6.37674	6.29384	6.21052	6.57434	6.87311	6.16055	7.21618	6.77672	6.66593	6.74454	6.77644	6.74173
CENPK	8.41709	8.1921	8.59509	7.58945	8.51825	7.56277	8.71492	8.85859	8.45922	8.05	7.8206	8.04189	9.12989	8.7691	9.0738	8.38853	7.81993	8.00745
CENPL	6.3377	6.12058	6.42384	5.60522	6.85763	6.50364	6.03745	6.11192	5.79267	6.30001	5.76817	6.68485	6.80971	6.50908	6.71956	6.52031	6.32538	6.33718
CENPM	8.13226	7.80217	7.72692	8.29666	8.69268	8.15246	8.08838	8.27277	8.41147	7.78292	8.07864	7.69838	8.44566	8.51624	8.40933	7.95395	8.25669	7.9538
CENPN	8.59153	8.64433	8.71911	8.04984	9.19763	8.78496	8.92887	9.06463	8.82088	8.11278	8.46122	8.45824	8.86309	9.04742	9.31936	8.59571	8.5597	8.47559
CENPO	5.53185	6.2562	5.52353	5.91066	4.87144	6.10394	6.03745	5.70382	5.96798	5.87667	5.61368	6.01517	6.51476	6.89814	6.77127	6.4168	6.4578	6.66749
CENPP	5.09943	5.27495	5.39719	4.78074	5.64398	4.88947	6.09109	5.52122	5.25715	4.75121	5.31255	5.01562	5.66629	5.27874	5.76269	5.29032	5.45119	5.05348
CENPQ	6.28941	6.52686	6.64383	6.48049	6.57348	6.1628	6.77109	7.05178	6.59952	6.67762	6.13299	6.10003	7.07238	7.26356	7.90685	6.98065	6.75788	6.86312
CENPS	6.91671	7.03673	7.01757	6.52267	7.17236	6.67517	7.19513	7.01769	7.12874	6.59208	6.8152	6.55559	7.27918	7.44531	7.31994	6.85049	6.64118	6.94396
CENPT	4.29562	3.94501	4.34236	4.0009	3.82716	3.39871	4.7614	5.31211	5.08518	4.75121	3.59321	4.29375	4.38636	4.7248	4.37703	4.18988	4.21103	3.9784
CENPU	9.38656	8.87255	9.33057	9.06863	9.19299	8.85505	9.40976	9.11789	8.96431	9.23394	9.26519	9.21592	10.4218	10.1175	10.5351	10.16	9.51006	9.81079
CENPV	1.87289	0	2.61888	2.43688	0	1.95009	1.16601	0	1.95043	1.12347	0	0	0	0	0	0	0	0.740719
CENPW	8.56135	8.31835	8.66987	8.62495	9.3387	8.62323	8.82586	8.76921	8.8163	8.38108	8.54198	8.54405	8.63821	8.70636	8.93979	8.57181	8.37104	8.38872
CENPX	9.14334	9.14664	9.49125	9.0326	9.94928	9.27968	9.672	9.75209	9.69015	8.84026	9.08335	9.09966	9.30663	9.29491	9.24163	9.00557	8.97379	8.91924
CEP104	4.64177	5.05451	4.5935	4.15185	1.52846	4.10679	4.82609	4.85223	4.664	5.55364	4.47348	5.18058	5.16384	4.83317	4.55617	4.99411	4.63387	5.11063
CEP112	3.83928	4.47635	3.12336	4.28849	1.52846	4.10679	4.10189	3.36386	3.63918	5.47935	4.53217	4.14191	4.26708	3.31315	4.83139	4.03868	4.15538	3.3777
CEP120	5.44634	5.34965	5.25871	4.87057	5.89308	5.45811	4.94738	5.31211	5.02298	5.72418	5.66703	6.03686	6.33367	6.08111	6.0041	5.9713	6.1371	6.4522
CEP126	5.25841	4.82943	4.34236	4.99562	2.25386	4.25841	4.29709	4.50386	4.18502	5.51698	5.05676	5.14108	5.75762	5.27874	5.5592	5.59133	4.59256	5.52223
CEP128	4.64177	5.14117	5.81467	4.73364	4.56178	5.18279	4.7614	4.99923	5.08518	5.96098	5.88536	6.27448	5.71268	4.68678	5.49034	5.81721	4.82434	5.41287
CEP131	3.36727	3.81045	4.43102	4.15185	3.82716	4.84224	3.87608	4.68854	4.7433	4.61906	3.89103	4.29375	4.94814	4.83317	4.85897	4.51035	4.82434	5.02403
CEP135	6.3377	5.87299	6.42384	5.65663	4.77542	4.32864	6.21705	5.86588	5.54962	6.86434	6.27723	6.16055	6.98058	6.29835	6.59391	6.27177	6.16555	6.18583
CEP152	7.25523	6.6403	6.98866	6.03242	3.82716	5.57829	7.18283	6.87266	6.2919	7.02964	7.33537	6.38006	7.74866	7.2375	7.61904	6.64334	6.77644	7.14201
CEP162	5.20734	4.7581	5.48263	4.73364	3.82716	4.39561	4.88801	5.13263	4.491	5.31821	5.20843	5.05866	6.09186	5.11663	5.62492	5.1498	5.38014	5.16561
CEP164	4.08542	3.73815	3.92054	4.15185	3.82716	3.52372	3.60824	2.84732	4.06668	4.54814	4.06012	4.14191	4.49652	3.94864	4.12782	3.9567	4.41437	3.6331
CEP170	7.25523	6.67944	6.78507	6.76446	4.00704	6.68859	6.1428	6.34972	6.1536	7.41559	6.87311	6.99292	6.56619	6.54139	6.35338	6.66931	6.58962	6.71433
CEP170P1	4.47905	4.86381	4.51454	4.87057	1.52846	4.79341	3.60824	3.74343	4.18502	4.98396	4.06012	4.05954	4.26708	4.52384	4.41469	5.32341	3.97426	4.53252
CEP19	5.65131	5.48834	5.1584	5.82337	4.00704	5.10489	5.76787	4.92761	5.36136	5.65836	5.71849	5.293	5.94416	5.80764	5.94099	5.88527	6.12266	6.11776
CEP192	6.16109	5.90636	5.97069	4.82635	4.31091	4.84224	5.73455	5.06747	5.14481	5.87667	4.64284	5.85347	6.10931	5.40117	5.86142	6.47686	6.29994	6.00169
CEP250	4.71673	5.19618	6.16416	5.035	2.7343	3.11058	4.69366	5.70382	6.26528	5.72418	5.17198	5.01562	5.02368	4.7248	4.85897	5.1498	5.79865	5.11063
CEP290	7.28016	6.91083	7.38244	6.7877	5.84658	6.42568	7.18283	6.7114	6.92274	7.79062	7.39983	7.28339	8.13672	7.42236	7.88018	7.58926	7.51183	7.76198
CEP295	6.65606	6.74548	6.69843	6.66754	5.53091	6.92229	6.72094	6.60062	6.68234	7.11798	6.73001	6.79076	7.82455	7.49014	7.77555	7.05148	6.97435	7.6411
CEP350	7.96554	7.64793	8.05448	7.88719	5.20206	6.91089	7.36804	7.13364	7.61333	8.30247	8.11749	7.95912	7.98906	7.68592	8.04531	8.06082	8.17159	8.20081
CEP41	5.35543	5.51022	5.39719	5.70627	4.87144	4.97953	5.98175	5.66029	5.67626	5.47935	5.17198	5.36335	5.32182	5.32896	5.34189	5.35575	4.78821	4.79911
CEP44	5.9286	6.07728	5.81467	5.68166	5.89308	6.06333	6.03745	6.01157	4.664	5.84743	5.47096	5.82882	6.68729	6.37207	6.74934	6.6169	6.06342	5.58408
CEP55	7.75939	7.63803	7.48953	7.2224	6.88089	7.23728	7.17042	7.60469	7.30897	7.74379	7.79086	7.40512	7.70343	7.35123	7.78636	7.41602	7.14835	7.17588
CEP57	8.03309	7.55629	8.06836	6.9816	7.663	7.43329	7.89837	7.69375	7.60274	7.7517	7.54228	7.37989	8.38965	8.22279	8.39997	7.9853	7.62371	8.00368
CEP57L1	6.26464	6.20347	5.87912	5.70627	5.98181	6.18189	6.44012	6.48061	6.1536	6.30001	5.88536	6.34572	6.62801	6.384	7.1122	6.12934	6.43461	6.87141
CEP63	6.7303	6.30707	6.86681	6.18027	5.58855	6.34326	6.24097	6.85346	6.64153	6.89324	7.01362	6.79076	7.30968	6.50908	6.71202	6.52031	6.39911	6.38429
CEP68	5.83076	4.82943	4.34236	5.63115	4.56178	5.2567	5.394	4.40183	4.95798	5.36021	5.0962	5.61478	4.82685	5.02819	4.48716	4.99411	5.33075	5.70035
CEP70	7.98083	7.46963	8.06144	7.4652	7.663	7.35973	8.00001	7.93202	7.48078	7.76739	7.69137	7.84696	7.74866	7.45099	7.95236	7.32092	7.21111	7.40449
CEP72	3.16799	3.73815	4.14681	4.47187	0	3.93734	3.45303	3.90134	4.06668	4.54814	3.69947	2.97406	3.91699	3.88292	3.51586	3.19714	4.15538	3.78127
CEP76	6.26464	5.19618	4.80733	4.95513	5.64398	5.48911	5.51667	5.47172	5.59308	5.08761	5.05676	5.39728	5.82252	6.02127	6.26338	5.18623	5.60452	5.89185
CEP78	6.86821	6.7638	6.54797	6.70465	5.64398	6.45737	6.73785	6.834	6.48883	6.57434	6.18878	6.80347	7.15029	6.74932	7.10646	6.70742	6.93358	6.8037
CEP83	6.53701	6.74548	6.83467	6.12659	4.77542	6.10394	6.21705	5.9765	5.96798	6.71047	6.54288	6.49421	7.05448	5.87681	7.05374	6.66931	6.46926	6.32515
CEP83-AS1	2.32019	4.00786	3.12336	1.46774	3.82716	2.5294	1.80233	1.35002	1.28241	2.78523	3.35389	0	2.93316	3.09829	2.10315	3.45776	1.92723	1.59121
CEP85	6.10638	6.20347	6.31156	6.18027	6.39112	5.81687	6.73785	6.0458	6.06377	6.211	6.07495	6.03686	6.66387	6.47602	6.85582	6.68213	6.76719	6.60918
CEP85L	4.39025	4.8974	3.65205	4.0009	4.31091	4.32864	4.54784	3.74343	4.664	4.98396	4.64284	5.01562	4.73993	5.02819	4.91259	5.29032	4.89401	5.31899
CEP89	6.55755	6.00209	6.62516	5.31649	4.87144	4.69049	6.4193	6.17514	5.82948	6.34254	6.17043	6.07928	6.05633	5.91018	6.77851	6.30528	6.24768	5.80794
CEP95	6.65606	6.61024	6.68046	6.18027	5.69736	5.68922	6.98453	6.79428	6.62068	6.66091	6.3926	6.67105	7.3247	7.56539	7.33474	6.58995	7.06019	7.11433
CEP97	5.35543	5.69345	6.13806	6.07083	5.58855	5.54917	5.35068	4.99923	5.86537	5.96098	6.15183	5.80374	6.37752	6.39582	6.30407	5.92893	6.31272	6.4411
CEPT1	5.95979	6.42691	5.84725	5.97283	5.84658	6.27376	6.21705	5.66029	6.00062	5.65836	5.95137	5.90155	5.86421	6.03646	6.61832	5.74577	5.8167	6.0896
CERK	5.72579	5.71244	5.99997	5.5245	6.0242	5.8411	5.47693	6.73257	6.46563	5.78712	6.22482	5.77821	5.64252	6.26003	5.54229	5.38739	6.07846	6.07532
CERS2	7.85374	7.59262	7.33727	7.58945	7.5369	7.48032	7.28991	7.35457	7.0373	7.24672	7.17886	7.31923	7.26369	7.70981	7.45255	7.5756	7.91515	7.52502
CERS4	1.87289	2.14697	3.4964	2.18007	2.7343	2.26863	2.85191	3.74343	1.95043	3.53708	3.06682	2.78195	2.11066	2.70069	1.67701	3.19714	3.12249	2.51022
CERS5	6.23944	5.53176	5.84725	6.01283	7.13416	6.27376	6.59665	6.45537	6.39372	6.25619	5.6406	5.90155	5.88462	6.2073	6.33386	5.88527	6.72958	6.14537
CERS6	5.76163	6.26909	5.87912	6.34603	6.57348	6.42568	6.21705	5.25473	5.54962	6.01457	6.18878	6.62883	6.22585	6.56253	6.11117	6.54857	6.09335	6.67698
CES2	4.98279	5.27495	4.51454	4.87057	3.09409	4.4596	5.55535	5.25473	4.58009	5.08761	5.05676	4.43111	5.09546	3.88292	4.83139	5.59133	4.96046	4.53252
CETN2	7.54987	7.58233	7.72692	7.83236	8.51082	7.79754	7.64404	7.55802	7.76354	7.50256	7.59141	7.5778	7.46681	7.38129	7.44347	7.49801	7.24483	7.26669
CETN3	8.02574	8.16133	8.07526	7.86551	8.69924	8.20941	8.30812	8.46212	8.22375	8.08173	8.00802	7.97044	8.00779	8.10161	8.23877	7.55485	7.85964	7.6841
CETP	4.29562	4.28661	3.12336	3.91906	5.58855	4.52088	4.88801	3.74343	3.63918	3.53708	3.79843	3.43247	3.74909	3.88292	4.58947	3.45776	4.26462	3.6331
CFAP20	7.64889	7.48628	7.67341	7.40635	8.54033	7.70816	7.78902	7.87604	7.69538	7.67888	7.55649	7.64995	8.10229	7.91281	8.07206	7.73164	7.49512	7.79287
CFAP36	7.22986	6.91903	7.20524	7.11623	7.33277	7.36809	7.50277	7.85688	7.36018	7.23548	7.376	7.27429	7.17535	7.1424	7.49271	7.15621	6.95002	6.8037
CFAP44	4.39025	3.66203	1.83648	2.18007	2.25386	3.26183	2.57909	1.35002	3.46298	3.53708	4.4123	3.29524	3.45374	4.48006	4.7155	3.67842	4.26462	3.46795
CFAP73	4.92073	4.8974	4.51454	4.58234	6.39112	5.57829	4.88801	4.29203	4.29438	5.23034	4.4123	5.05866	4.90883	4.60761	4.83139	4.95241	4.89401	4.99396
CFAP97	8.34213	8.14045	8.34427	8.00096	8.54762	8.13297	7.7395	7.7571	7.51507	8.17882	7.97138	8.17009	8.10229	8.11599	8.09833	8.14653	7.80192	7.9847
CFDP1	8.62597	8.34598	8.26207	8.57572	7.96458	8.5182	8.23258	8.59522	8.31093	8.81027	8.51313	8.86217	8.50617	8.38292	8.48207	8.48308	8.32134	8.52898
CFL1	11.7453	11.7306	11.7633	12.0065	11.7936	12.0079	11.6958	11.7637	11.732	11.7469	11.8001	11.7541	11.3935	11.4609	11.2945	11.4272	11.5357	11.5193
CFL2	4.47905	3.40614	4.03811	3.53547	4.87144	3.11058	4.469	4.04365	3.63918	4.75121	3.21748	2.78195	4.06736	3.74174	4.03417	3.86977	4.31628	3.85002
CFLAR	5.15439	4.93022	5.0506	5.1826	4.67255	4.4596	4.7614	4.77271	4.81846	5.03672	5.27867	5.05866	5.06002	4.68678	4.91259	4.56671	5.14322	4.2568
CGGBP1	8.54086	8.35809	8.20664	8.1519	8.76946	8.44895	8.08838	7.7674	8.13832	8.08173	8.4948	8.1303	8.22738	8.34985	8.56184	8.17853	8.27639	8.41164
CGRRF1	5.86411	5.88977	5.87912	5.3481	5.69736	5.91143	5.95307	6.55381	6.59952	4.68665	5.79238	5.69881	5.84352	6.00591	6.27366	5.90726	5.38014	5.47948
CH17-340M24.3	3.69843	3.09486	3.79253	3.16132	5.20206	4.02455	4.6226	3.56609	4.664	4.02884	3.59321	3.55778	4.06736	3.66561	3.64819	3.9567	3.23415	3.78127
CHAC1	1.87289	2.8424	1.19263	4.0009	2.25386	3.84451	2.57909	2.03503	2.75056	3.38261	3.21748	3.29524	4.64743	4.83317	5.19816	5.25645	4.46103	4.99396
CHAC2	6.31376	5.90636	5.84725	5.93168	6.65669	6.10394	6.55908	6.965	6.2919	6.14043	5.69299	5.72576	6.57877	6.49814	6.90295	6.05248	5.51891	5.56376
CHAF1A	6.18768	6.28186	6.56766	5.99297	3.38183	5.68922	6.48087	6.73257	6.36893	6.92157	6.03492	6.07928	7.30212	6.96319	6.90955	7.12839	7.07526	7.07179
CHAF1B	7.30466	6.79086	7.4045	7.17911	7.15339	7.28221	7.06715	6.98278	6.88826	7.31239	7.35176	7.33682	7.68027	7.84107	7.45255	7.25384	7.91515	8.10209
CHAMP1	6.61746	6.36823	6.56766	6.71681	5.69736	6.94482	5.92381	5.82704	6.1536	6.72661	6.92878	6.64304	6.72172	6.57299	6.54382	7.06132	7.09018	6.91217
CHCHD1	8.66435	8.45432	8.73226	8.95001	9.51999	8.64747	8.89911	9.03936	8.84355	8.52189	8.79361	8.51729	8.49957	8.4297	8.23351	8.00072	8.26329	8.12307
CHCHD10	5.57278	5.88977	5.30636	5.57881	4.16696	5.66228	5.92381	5.70382	6.34371	4.98396	5.58624	5.80374	5.38047	5.6585	5.39936	4.95241	5.25335	5.21857
CHCHD2	11.6941	11.6193	11.81	11.4764	12.5755	11.9267	12.2277	12.2423	12.1486	11.4201	11.5431	11.6106	11.7382	11.6854	11.8767	11.468	11.1424	11.2567
CHCHD3	5.99033	6.43836	6.31156	6.75269	5.98181	6.00018	5.95307	6.37686	6.21052	6.11612	6.27723	6.84094	6.51476	6.11012	6.324	6.30528	6.35038	6.18583
CHCHD4	6.16109	5.78601	5.6397	6.1626	6.42316	6.47296	6.21705	5.78713	6.46563	6.06624	6.05508	6.16055	6.17705	5.95884	5.88844	5.44866	5.85214	5.70035
CHCHD5	6.83495	6.71755	6.68046	6.52267	7.26367	6.80401	7.32391	7.42128	6.87071	6.57434	6.58507	6.62883	6.56619	6.63419	6.2426	6.32175	5.98578	6.26349
CHCHD6	5.20734	5.59454	5.25871	4.87057	5.69736	5.63482	5.55535	5.42045	5.14481	4.98396	5.47096	5.87771	4.5486	4.56634	5.10911	5.25645	5.25335	4.79911
CHCHD7	8.78247	8.63689	8.72789	8.86241	9.29174	9.08039	8.82981	8.9106	8.91379	8.93711	9.16675	9.05518	8.76194	8.53241	8.72807	8.63906	8.49952	8.54721
CHD1	7.37577	7.62305	7.48953	7.70994	6.06539	7.66131	7.13255	7.59317	7.34754	8.04357	7.8147	7.88333	8.07147	7.71454	7.87681	7.98012	8.11801	8.30243
CHD1L	6.96363	6.80862	7.20524	6.8331	6.92631	6.50364	6.65123	6.55381	6.97295	6.5382	6.67898	6.19954	6.36305	6.57299	6.29401	6.90616	6.81287	6.98275
CHD2	6.97894	6.53755	6.78507	7.02136	5.84658	6.14344	6.851	6.45537	6.59952	7.31239	6.98239	6.97055	7.74866	7.4396	7.47945	7.54085	7.8983	7.38724
CHD3	2.66114	2.14697	2.89306	3.01141	0	2.75017	1.16601	0	0	2.5147	3.06682	3.55778	2.76725	0.755007	3.37016	3.86977	3.8395	3.17825
CHD4	8.67848	8.908	8.54134	8.59232	6.68339	7.97224	8.30812	8.62948	8.67177	9.0696	8.62185	8.74846	8.46272	8.52972	8.39292	8.96158	9.0232	8.96451
CHD6	5.99033	5.82143	6.0844	6.31436	5.74884	6.23771	5.73455	5.56908	6.2919	6.211	6.42393	6.36299	5.98252	5.3775	5.79159	6.11051	6.00164	6.40729
CHD7	7.21701	6.97515	7.16703	6.9816	5.47086	6.86436	6.33289	6.20575	6.21052	7.62821	6.91782	7.20892	6.61586	6.23391	6.75669	7.82702	7.58738	7.53026
CHD8	6.81803	6.87756	7.12778	6.66754	4.96146	6.12383	7.06715	7.01769	6.97295	7.16614	7.27651	6.80347	7.18361	6.979	6.98658	7.10003	6.99034	7.01305
CHD9	7.34066	7.29793	6.42384	7.66671	7.55147	7.89334	7.2433	7.03484	6.72204	7.61959	7.95001	7.85919	7.31721	7.12118	7.38303	7.48345	7.7323	7.73497
CHDH	1.87289	2.14697	1.83648	3.16132	1.52846	2.5294	2.85191	3.12858	2.75056	3.53708	2.48852	2.97406	2.76725	1.90711	1.90575	3.04674	2.72388	2.51022
CHEK1	7.44354	7.48075	7.73565	7.69157	7.59431	7.44914	7.37886	7.29888	7.84669	7.53042	7.41551	7.5778	8.10229	8.03131	8.28778	7.97492	7.82439	8.00745
CHEK2	6.45181	5.6742	5.97069	5.55191	6.06539	5.2567	6.09109	6.45537	6.09434	5.51698	5.0962	5.25649	5.68967	5.69726	6.28387	5.41835	5.25335	4.53252
CHEK2P2	2.32019	2.14697	1.83648	1.46774	2.7343	2.26863	1.16601	2.03503	1.28241	2.18145	0.942911	0.985236	2.11066	2.14998	2.27675	2.87883	1.6334	0
CHERP	6.10638	6.47219	5.48263	6.49469	4.00704	6.25585	5.98175	4.99923	5.90039	6.99005	6.36057	5.90155	6.03823	6.02127	5.83389	6.64334	6.55778	6.83795
CHFR	4.98279	5.44358	4.5935	5.035	2.25386	4.10679	4.7614	4.68854	5.54962	3.53708	4.53217	5.01562	4.73993	5.67801	4.93867	4.51035	4.92762	4.65285
CHI3L2	3.16799	0.753427	1.83648	3.01141	1.52846	2.75017	1.80233	3.36386	1.28241	2.5147	2.48852	1.9778	2.76725	3.09829	3.02544	1.49358	0	2.81539
CHIC1	2.32019	1.24585	3.12336	3.16132	3.09409	3.11058	2.57909	2.84732	3.79618	2.5147	2.70806	3.14357	3.99413	3.40966	3.76939	3.33332	3.8395	3.06714
CHIC2	6.97894	7.03673	6.88261	7.2224	8.27661	7.43329	7.15791	7.19594	6.95641	7.23548	6.90677	7.2279	7.23219	7.09239	7.74262	7.05148	7.09758	7.05733
CHID1	5.48973	5.61487	5.10551	5.11069	5.64398	5.39405	5.0044	5.13263	5.67626	5.31821	5.55827	5.18058	4.82685	4.83317	4.48716	4.72367	4.89401	4.99396
CHKA	5.53185	4.43121	5.60201	4.35224	2.25386	4.69049	3.99339	4.04365	4.7433	4.31173	4.4123	3.14357	4.78404	4.83317	4.80328	5.50743	5.19933	4.99396
CHKB	4.19434	5.16894	4.51454	4.07835	3.09409	3.26183	4.82609	4.68854	4.7433	4.22346	3.69947	1.9778	4.06736	4.43491	4.29865	3.9567	3.43448	4.20525
CHKB-AS1	2.32019	3.8793	3.12336	2.18007	1.52846	3.84451	4.88801	1.35002	3.93776	3.53708	3.59321	3.55778	3.34013	3.09829	3.20807	1.49358	3.00146	2.94675
CHKB-CPT1B	2.66114	3.58167	4.43102	1.86743	2.25386	2.26863	4.29709	4.17318	3.79618	3.20959	3.06682	2.97406	3.91699	4.18515	3.93401	3.45776	4.36616	3.85002
CHM	4.39025	4.3846	4.51454	4.52817	5.53091	5.29229	5.16307	4.04365	4.58009	5.08761	4.84157	5.01562	4.9864	5.11663	5.41802	4.77241	4.92762	5.21857
CHML	7.32876	7.38337	7.19262	7.77536	7.3825	7.58446	7.15791	6.87266	7.05295	7.98437	7.92285	7.95343	7.04545	6.50908	6.84207	7.71927	7.44378	7.53026
CHMP1A	6.65606	6.66976	6.13806	6.75269	6.76066	6.56311	6.86646	6.50543	6.21052	6.211	6.80333	6.07928	6.47494	6.28569	6.14517	6.33803	6.28705	6.78626
CHMP1B	7.54987	7.53511	7.74432	7.98093	8.22302	7.68158	7.49284	7.42128	7.3727	7.63678	7.64558	7.44622	7.3975	7.2375	7.73147	7.17446	7.03728	7.39876
CHMP2A	7.17775	7.103	7.41541	7.41384	7.97543	7.66809	7.37886	7.45987	7.1139	7.85079	7.46153	7.61433	6.67563	6.66385	6.4104	6.76876	7.07526	6.88785
CHMP2B	7.42131	7.51361	7.60836	7.41384	7.7027	7.62688	7.63504	8.01212	7.62384	7.10569	7.61875	7.77135	7.70343	7.77467	8.00268	7.34529	7.37844	7.36979
CHMP3	6.69366	6.55869	6.62516	7.11623	7.663	7.2998	6.72094	6.5774	6.74148	7.16614	6.95046	6.91308	6.98058	6.86448	6.74934	7.34529	6.90011	6.92815
CHMP4A	6.78357	6.72692	6.94416	6.65495	7.09492	6.56311	6.70383	6.42967	6.76067	6.57434	6.89564	6.67105	6.65201	6.77672	6.50943	6.20231	6.38708	6.38429
CHMP4B	6.10638	6.21684	6.0844	6.9816	5.93812	6.25585	5.51667	6.40351	6.1536	6.40408	6.34428	6.25611	6.09186	6.02127	6.13392	6.28862	5.9371	6.22518
CHMP5	6.81803	6.75467	7.25466	6.59033	7.92037	7.0316	7.04013	7.5341	7.12874	6.16434	6.75487	6.75195	7.24802	7.22429	7.3972	7.12839	6.26092	6.485
CHMP6	3.36727	3.94501	1.19263	3.4212	4.00704	3.39871	3.27908	3.90134	3.63918	3.20959	3.59321	3.43247	2.76725	2.84574	2.81629	3.9567	3.52509	3.3777
CHMP7	5.83076	6.01745	5.5633	5.37904	5.69736	5.81687	4.82609	5.06747	5.90039	5.62429	5.52975	5.75222	4.86842	5.42445	5.32222	5.35575	5.40422	5.70035
CHN1	5.53185	4.56262	3.79253	4.58234	2.7343	4.18459	3.87608	4.50386	3.93776	3.92071	3.79843	3.87921	4.49652	3.81405	4.33838	3.67842	4.03719	5.13838
CHORDC1	6.74827	6.57953	6.62516	6.8331	6.25534	6.29145	6.89689	6.37686	6.95641	6.90747	6.99287	6.72548	7.08125	7.19751	7.0175	7.00124	6.71039	6.75971
CHP1	7.73255	7.36549	7.69146	7.60916	7.74134	7.77885	7.28991	7.36816	7.44564	7.43538	7.18802	7.65697	7.24013	7.05557	7.04776	7.43885	7.50071	7.73042
CHPF	0	3.49658	2.61888	3.4212	3.38183	2.26863	2.85191	1.35002	2.40527	3.38261	2.48852	3.14357	2.57975	2.84574	1.67701	1.89677	3.43448	3.91563
CHPF2	4.08542	4.18148	4.80733	4.52817	4.16696	3.26183	4.88801	5.25473	5.20207	5.27494	4.69515	4.36406	4.38636	4.48006	4.33838	4.56671	4.0975	4.65285
CHPT1	6.31376	6.21684	6.23974	6.39226	6.90378	6.60616	6.16798	5.90371	5.59308	6.23377	6.32781	6.61448	6.42008	6.73076	6.07636	6.43205	6.39911	6.28847
CHRAC1	8.57148	8.79002	8.71911	8.80091	8.75064	8.83407	8.59009	8.75893	8.93927	8.90554	8.81445	8.63573	9.00031	8.71583	8.98273	9.08007	8.74549	8.89097
CHRNA5	2.93671	3.94501	4.34236	4.4133	4.44179	4.10679	5.0044	4.04365	3.93776	3.80381	3.79843	3.43247	4.44249	3.66561	4.65386	3.77726	4.36616	4.69083
CHRNB1	3.16799	2.6974	2.28008	3.01141	0	3.84451	3.87608	2.4976	2.40527	4.61906	3.21748	3.43247	2.57975	1.2481	3.29139	3.67842	4.03719	3.06714
CHRNB2	0	0.753427	0	0	0	1.54069	3.08125	3.12858	0	1.12347	1.50833	1.56524	2.11066	1.90711	1.40503	0.932009	2.5621	2.32943
CHST10	2.93671	3.20625	1.83648	3.2971	2.7343	3.84451	3.99339	3.90134	3.63918	3.6766	2.48852	2.56027	3.08194	4.23868	3.02544	4.32672	4.26462	4.69083
CHST11	4.19434	2.97415	2.61888	4.68495	3.62161	4.4596	3.74836	3.90134	3.26223	4.75121	3.21748	4.29375	3.21681	3.66561	3.93401	2.4698	4.82434	4.86703
CHST12	5.04229	4.8974	4.43102	5.11069	3.38183	5.29229	4.6226	4.92761	4.95798	5.23034	4.88726	5.46284	4.44249	4.83317	5.24071	5.38739	5.47412	5.19233
CHST14	6.26464	6.2432	5.97069	6.55011	5.58855	6.12383	6.09109	6.0458	6.39372	5.75599	5.52975	5.39728	5.77958	5.82525	5.92803	5.38739	6.4919	6.33718
CHST15	6.78357	6.54816	6.91371	6.62945	6.65669	6.71505	6.61508	6.42967	6.44206	6.92157	7.08397	6.81607	6.24175	6.6736	6.0041	6.35413	6.82183	6.74173
CHST2	5.61258	6.26909	5.99997	5.68166	5.74884	6.08378	5.21231	5.61541	5.79267	6.04064	6.18878	5.99315	5.40893	4.96607	5.26152	5.79379	6.31272	6.23806
CHST7	3.69843	4.06809	4.34236	4.22178	4.44179	4.02455	4.469	4.17318	4.58009	5.18432	4.58857	3.67306	3.74909	4.3883	3.98496	4.67322	4.21103	4.2568
CHSY1	4.08542	4.56262	5.48263	5.14709	3.62161	4.69049	4.6226	4.40183	5.14481	5.18432	5.20843	4.77874	3.6572	5.25295	4.58947	5.03464	5.17155	4.93189
CHTF18	4.39025	3.40614	4.43102	3.16132	3.38183	2.9416	4.38561	3.74343	4.29438	3.38261	3.35389	2.78195	3.34013	3.74174	4.03417	4.11626	4.50622	3.55289
CHTF8	7.21701	7.48628	7.41541	7.36057	7.52218	7.09341	7.09367	7.22611	6.85294	7.22415	7.12268	7.29243	7.09882	7.50113	7.07741	6.89519	7.62883	7.35804
CHTOP	7.75939	7.65285	7.6366	7.75191	6.9485	7.78511	7.69689	7.63874	7.60274	7.63678	7.58449	7.4543	7.55856	7.62691	7.59465	7.5338	7.46682	7.39876
CHUK	5.35543	5.16894	4.66835	5.07334	5.34271	5.2567	5.80043	4.17318	5.36136	5.5894	5.55827	5.46284	5.54334	5.735	5.5592	5.9713	5.54079	5.26965
CHURC1	8.57148	8.1544	8.44351	8.12477	9.5887	8.74057	9.06242	8.96528	9.12469	8.26426	8.52763	8.42573	8.55791	8.60809	8.81336	7.9956	7.77447	8.02242
CHURC1-FNTB	5.4016	4.82943	4.99352	5.31649	6.18233	5.66228	4.88801	5.61541	5.59308	4.98396	5.79238	4.61537	5.66629	4.90115	5.64089	4.67322	5.02399	4.2568
CIAO1	7.54987	7.46404	7.54024	7.67919	7.47711	7.75355	7.57983	7.62748	7.77302	7.60219	7.34359	7.52507	7.04545	7.38723	7.3735	7.0711	7.40254	7.15566
CIAPIN1	7.50827	7.99678	7.6366	7.47239	8.09958	7.68158	7.70551	7.73629	7.17237	7.41559	7.50614	7.07906	7.53938	7.70506	7.91015	7.45387	7.37844	7.18256
CIB1	7.20404	6.95136	7.15407	7.45797	8.38632	7.59874	7.45242	7.38162	7.73472	7.36491	7.53512	7.39676	7.08125	7.07041	6.85582	6.66931	6.92528	7.07897
CIB2	2.66114	2.14697	3.12336	3.01141	2.25386	3.52372	2.24237	2.4976	1.28241	1.12347	3.35389	2.29823	2.93316	1.2481	3.64819	1.89677	3.33779	2.94675
CIC	3.54233	3.58167	2.89306	4.07835	0	0.96692	2.57909	3.12858	3.02896	2.5147	1.9135	1.56524	3.55906	2.5394	3.37016	3.33332	4.03719	4.40124
CIDEB	5.86411	6.06255	6.13806	5.93168	4.77542	6.12383	6.19272	6.01157	6.26528	5.98802	5.71849	6.16055	5.92458	5.77178	5.36131	5.44866	6.36272	6.07532
CIDECP	4.64177	3.66203	5.10551	5.1826	3.62161	5.22022	4.88801	4.29203	4.06668	4.39492	4.74563	4.67191	5.64252	5.35343	5.64089	5.44866	4.96046	5.60412
CIITA	5.79661	6.09186	5.67643	5.3481	3.62161	5.54917	5.51667	5.31211	5.82948	5.84743	5.88536	5.46284	4.90883	5.32896	4.77461	5.99203	6.10808	6.33718
CINP	5.79661	5.27495	5.78133	5.31649	5.20206	6.00018	6.19272	5.94056	5.67626	5.55364	5.66703	6.10003	5.61836	5.44737	5.74801	5.22177	5.25335	4.61384
CIPC	4.92073	5.27495	4.73951	5.11069	5.69736	5.45811	5.59301	5.13263	4.39604	5.47935	5.55827	5.46284	4.69442	4.7248	5.24071	5.64467	5.66555	4.69083
CIR1	8.28169	8.01219	8.23153	8.09713	7.22784	7.75991	8.05503	8.04634	7.97543	8.21361	7.96073	8.23251	8.47287	8.3035	8.52788	8.49402	8.24341	8.38293
CIRBP	8.70174	8.61939	9.23838	8.84312	9.08197	9.32118	8.48382	8.84407	8.53361	8.85869	8.90329	8.72528	8.76744	8.74618	8.39056	9.05566	9.01931	9.02708
CISD1	7.15097	6.92718	6.92902	7.33713	8.03884	7.33435	7.41085	7.19594	7.52633	7.04259	7.25924	7.26513	7.36156	7.27642	7.24876	6.98065	6.89162	7.17588
CISD2	8.17276	8.12989	8.30961	8.00096	8.94524	8.16211	8.45343	8.72236	8.60434	7.92962	8.23699	8.02028	8.34985	8.45536	8.843	7.9056	7.87264	8.14376
CISD3	5.61258	5.76797	5.87912	6.19773	6.2905	6.3262	6.59665	6.20575	6.62068	5.81759	5.81619	6.27448	5.88462	5.82525	5.68778	5.81721	6.24768	5.58408
CISH	0	0	0	0	0	0	0	0	0	0	0	0.985236	0	0	0	0	0	0
CIT	5.68903	5.98657	5.1584	4.99562	4.67255	4.57966	5.1121	4.99923	5.54962	5.23034	4.88726	4.92548	5.49107	5.25295	5.73319	5.32341	6.09335	5.79056
CITED2	5.20734	5.02443	4.99352	5.40933	6.35836	6.04258	5.47693	4.99923	5.02298	6.27827	6.27723	6.18018	4.86842	4.86756	4.85897	5.44866	5.05473	4.69083
CIZ1	6.31376	6.21684	5.6397	6.26553	2.25386	5.76716	6.1428	6.20575	6.03254	5.75599	5.79238	5.43043	6.03823	6.48713	5.73319	6.37006	6.4578	5.70035
CKAP2	9.30389	9.26715	9.40906	8.85967	8.99937	9.21626	9.46667	8.9382	9.08338	9.2757	9.23017	9.20877	9.79303	9.6464	9.96077	9.38049	9.20208	9.48711
CKAP2L	7.16442	7.55629	6.78507	7.28091	5.64398	6.95596	7.18283	7.40818	7.42174	7.5487	7.61875	7.66395	7.6861	7.80604	7.90685	7.78607	7.77908	7.43837
CKAP4	6.23944	6.42691	6.46641	6.77613	5.98181	6.25585	6.00987	6.62346	6.36893	6.92157	6.52854	6.27448	6.20976	6.15258	5.81993	6.80436	6.57908	6.52759
CKAP5	8.02574	7.68205	7.77852	7.47955	5.47086	6.80401	7.68822	7.63874	7.39743	8.13714	7.8783	7.9928	8.05356	7.77467	8.13545	8.02104	7.91933	7.99991
CKB	4.5627	5.30028	4.73951	5.86768	5.79854	5.66228	5.76787	5.74607	5.63526	5.62429	5.44064	5.49453	5.35145	4.93398	5.24071	5.47835	5.05473	5.77296
CKLF	7.50827	7.50274	7.81192	7.58945	8.03884	7.61288	7.91334	8.10434	7.754	7.25788	7.19711	7.40512	7.74308	7.92511	8.13545	7.14699	7.18356	7.49313
CKLF-CMTM1	5.25841	5.16894	5.52353	5.31649	6.0242	5.60683	5.51667	5.66029	5.54962	5.08761	5.13459	5.293	5.82252	5.51402	5.84772	4.56671	5.02399	5.21857
CKM	3.96759	4.1259	4.03811	5.37904	4.16696	4.9352	3.99339	3.12858	3.63918	3.92071	5.24398	5.21904	4.82685	3.58523	3.76939	5.07406	4.89401	4.03854
CKMT2-AS1	5.20734	4.33644	4.43102	4.07835	3.82716	4.57966	4.94738	4.68854	3.46298	4.54814	4.93154	3.97219	4.44249	4.93398	4.45138	4.77241	3.52509	4.79911
CKS1B	9.5996	9.44518	9.43341	9.44451	10.4213	9.81731	9.97453	10.1306	10.0648	9.26744	9.50017	9.16513	9.53355	9.7247	9.76878	9.01066	8.9433	8.93515
CKS2	11.5193	11.5917	11.6536	11.5325	12.4874	11.9603	12.0966	12.2909	12.239	11.3824	11.4694	11.4826	11.32	11.6128	11.8778	10.9568	10.9716	11.0698
CLASP1	5.4016	5.55299	5.5633	5.68166	4.16696	5.02254	5.16307	4.92761	3.79618	5.40103	4.9745	5.39728	5.13006	5.08775	4.91259	5.29032	5.76186	5.54314
CLASP2	6.78357	6.09186	6.1898	5.65663	6.10543	6.29145	5.95307	5.74607	5.79267	6.23377	5.99375	6.27448	6.16041	6.24703	6.21084	5.95027	6.24768	6.22518
CLASRP	1.87289	3.30966	3.12336	2.43688	1.52846	1.54069	3.08125	2.84732	1.28241	2.78523	2.70806	3.55778	3.55906	3.66561	3.02544	2.4698	3.12249	3.78127
CLCC1	5.44634	5.11286	5.97069	5.68166	5.40821	5.60683	5.62972	5.06747	5.14481	6.14043	5.50065	5.77821	5.02368	5.3775	5.59243	5.44866	5.83453	5.71885
CLCN2	2.93671	1.61229	0	2.65481	0	0.96692	1.16601	4.04365	2.40527	2.18145	2.22947	0	2.36419	1.90711	2.27675	0	1.92723	2.94675
CLCN3	6.59776	6.38016	6.33472	6.26553	6.68339	6.25585	5.16307	5.42045	5.36136	6.36335	6.20691	6.59998	6.03823	6.39582	6.26338	6.47686	6.33793	6.39584
CLCN4	5.4016	4.82943	4.99352	5.25109	4.44179	5.42644	5.47693	4.50386	4.06668	5.13677	5.27867	4.61537	4.49652	4.2903	4.08175	4.56671	4.85959	5.16561
CLCN5	2.32019	1.61229	2.61888	2.18007	1.52846	2.9416	1.80233	2.4976	1.28241	3.6766	0.942911	0	2.11066	1.2481	1.90575	2.87883	3.00146	2.32943
CLCN6	1.22115	2.14697	1.83648	3.91906	1.52846	0.96692	1.80233	1.35002	1.28241	2.18145	2.48852	2.78195	3.34013	2.14998	1.90575	2.87883	0	2.94675
CLCN7	4.39025	4.82943	4.8721	4.35224	3.09409	4.39561	4.6226	4.59916	4.06668	4.54814	4.74563	4.97126	3.74909	4.18515	3.44485	3.77726	5.08483	5.02403
CLDN12	1.87289	3.73815	2.89306	1.86743	0	2.75017	3.08125	2.03503	2.40527	3.20959	1.9135	2.78195	3.21681	3.81405	2.10315	3.33332	2.72388	4.20525
CLDN15	1.87289	2.6974	3.65205	3.73997	2.7343	0.96692	3.74836	0	3.93776	3.01296	2.22947	2.29823	0.871627	2.70069	2.4317	2.87883	3.23415	2.81539
CLDN23	1.87289	1.90426	3.3219	1.86743	3.09409	2.26863	3.45303	2.03503	2.40527	3.01296	2.48852	3.29524	2.11066	2.14998	2.10315	2.68876	3.43448	2.51022
CLDND1	7.38729	7.51901	7.52017	7.26443	7.95365	7.56277	7.44214	7.40818	6.93967	7.17793	7.16965	7.42992	7.40458	7.58102	7.78994	7.40833	7.0218	6.99038
CLEC11A	0	0	0	0	2.25386	0	0	0	0	0	0	0.985236	0.871627	0	0	0	0	0
CLEC16A	3.83928	3.09486	4.03811	4.99562	1.52846	3.26183	4.69366	4.04365	3.93776	4.22346	4.69515	3.77981	3.55906	2.70069	3.51586	4.51035	5.02399	4.2568
CLEC17A	3.54233	3.58167	2.28008	2.18007	2.7343	0.96692	2.57909	3.12858	3.46298	1.12347	1.50833	1.9778	3.08194	3.20972	3.58354	2.21155	3.43448	3.06714
CLEC2B	7.90272	7.85868	7.89997	7.54921	8.32829	7.99941	8.2266	8.75377	8.42956	7.74379	7.60514	7.73201	7.74866	7.79714	7.91344	7.51243	7.10495	7.42716
CLEC2D	8.45042	8.05001	8.38922	7.91385	8.42639	7.91062	8.58543	8.40393	8.51112	8.26426	8.31427	8.25582	8.18688	8.04264	8.25443	8.1419	7.7465	7.8059
CLEC4C	0	0.753427	0	0	0	0	0	0	0	0	0	1.56524	0	0	0.631718	0	0	1.22775
CLECL1	8.50431	8.47393	8.72351	8.5623	9.3218	8.70141	8.78576	8.9106	8.82088	8.27528	8.11749	8.56659	8.55473	8.72523	8.58266	8.01599	7.83771	7.79723
CLGN	5.20734	5.59454	6.23974	6.33028	6.25534	6.21934	6.06452	5.56908	5.82948	6.50114	6.17043	6.12049	6.56619	6.4422	6.30407	6.63018	6.22082	6.59923
CLHC1	3.36727	3.81045	2.89306	3.53547	1.52846	3.11058	3.60824	2.84732	2.40527	3.20959	2.70806	2.78195	3.99413	4.0115	4.2578	4.11626	3.90845	3.9784
CLIC1	9.12969	9.11844	9.14317	9.3598	9.73946	9.29292	9.55997	9.61631	9.50915	8.8877	9.10767	9.1428	9.47757	9.48964	9.47894	8.91078	8.98181	8.99139
CLIC2	1.87289	0.753427	3.12336	1.46774	0	0	0	0	2.40527	0	0.942911	0.985236	0	0	2.27675	3.33332	0.766223	0.740719
CLIC4	6.45181	6.82617	6.40207	6.89862	6.85763	6.87614	6.31045	6.14388	6.36893	6.48224	6.32781	6.67105	7.15869	7.19073	7.17936	7.39283	7.21111	6.95181
CLINT1	7.98083	8.01602	8.23769	8.01087	7.56589	7.82817	7.89083	7.85688	7.24229	8.21932	8.15532	8.22308	8.42142	8.13728	8.4975	8.10431	7.63393	8.21391
CLIP1	5.20734	5.83882	6.11148	5.88933	5.47086	5.95649	6.16798	6.29384	5.41078	6.25619	6.05508	6.36299	6.47494	5.69726	6.37264	6.52031	6.38708	6.37266
CLK1	7.28016	7.46404	7.10101	7.07903	6.9485	6.82846	7.2784	7.313	7.15797	6.99005	6.92878	7.19934	7.7979	7.91281	8.21762	7.48345	7.4895	7.36393
CLK2	5.72579	6.33185	6.60624	6.29827	4.56178	5.71567	6.37674	5.78713	5.7549	5.36021	5.61368	5.72576	5.59378	5.9747	5.5592	5.72116	5.90372	5.45761
CLK2P1	3.96759	3.8793	4.34236	4.0009	0	3.93734	4.29709	4.29203	3.79618	2.5147	2.89856	2.78195	3.55906	3.66561	3.71006	3.33332	3.8395	3.28142
CLK3	5.04229	5.7497	5.0506	5.14709	2.25386	4.57966	5.59301	5.52122	5.79267	5.36021	4.9745	5.05866	5.59378	5.77178	5.28204	5.79379	5.35566	5.24434
CLK4	5.25841	4.47635	4.66835	5.07334	4.00704	5.14437	5.394	4.99923	5.79267	5.23034	5.20843	4.82933	5.90474	6.37207	6.50943	5.47835	5.79865	6.04631
CLLU1OS	1.22115	2.14697	0	0	0	0	1.80233	0	0	0	0	0	0	0	2.4317	0	1.26401	1.22775
CLMN	3.16799	3.58167	4.03811	0.912987	3.38183	4.18459	2.57909	0	2.40527	2.5147	3.21748	3.43247	2.76725	3.66561	2.5716	2.68876	3.8395	4.03854
CLN3	4.85588	5.02443	4.99352	5.28416	4.87144	4.52088	6.21705	4.99923	5.59308	5.36021	5.0962	5.46284	4.69442	4.7248	4.41469	5.59133	5.7241	4.57376
CLN5	4.5627	3.8793	3.4964	3.4212	4.31091	4.63614	4.469	3.90134	4.18502	4.12943	2.70806	3.87921	4.5486	3.94864	3.93401	4.32672	3.43448	4.03854
CLN6	4.98279	5.51022	5.97069	6.28199	5.89308	5.9785	5.89394	5.86588	5.59308	5.69165	5.61368	5.49453	5.86421	5.71625	5.59243	6.37006	6.03286	6.22518
CLN8	4.39025	3.94501	4.80733	4.35224	4.16696	5.29229	4.38561	4.17318	5.20207	4.68665	4.58857	4.87821	5.19685	5.2267	4.37703	4.90947	3.97426	4.35468
CLNS1A	8.49369	8.3701	8.41118	8.4096	9.16957	8.80665	8.51359	8.5302	8.73133	8.22502	8.15998	8.40503	8.13672	8.50263	8.24662	8.65864	8.20624	8.14718
CLOCK	4.39025	4.43121	4.51454	5.46806	4.44179	4.63614	4.88801	4.29203	4.39604	5.93342	4.93154	4.61537	5.19685	5.25295	5.34189	5.32341	5.05473	5.56376
[truncated: 10,537 more rows]
