# Supplementary material for: Performativity and National Identity: Japan’s Domestic Policies
Source: Oxford University Press journal article supplement (doi:10.1158/2159-8290.cd-18-1393), 2007-01-01
Supplement: 21598290cd181393-sup-212867_2_supp_5481623_pqbjqx.xlsx [file 21598290cd181393-sup-212867_2_supp_5481623_pqbjqx.xlsx]

## Sheet: CB vs CS
Supplementary Table 2a: GSEA Comparing Tumor Cells from the Spleen (S) and bone marrow (B) of Cyclophosphamide (C ) treated mice engrafted with DFBL-20954. Positive enrichment scores indicate gene sets expressed higher in BM as compared to spleen determined by the ordering of the rank ordered differential expression lists.
pathway	pval	padj	ES	NES	nMoreExtreme	size
GCM_CALM1	0.00334448	0.0271266	0.541671	2.48998	0	93
GCM_GSTA4	0.0028169	0.0271266	0.586165	2.4695	0	56
GSE13485_CTRL_VS_DAY21_YF17D_VACCINE_PBMC_UP	0.0035461	0.0271266	0.489288	2.46528	0	166
STARK_PREFRONTAL_CORTEX_22Q11_DELETION_UP	0.00352113	0.0271266	0.498027	2.43749	0	133
AMIT_EGF_RESPONSE_480_HELA	0.00340136	0.0271266	0.50492	2.42596	0	113
KIM_WT1_TARGETS_UP	0.00343643	0.0271266	0.494826	2.4255	0	131
GSE6259_DEC205_POS_DC_VS_CD8_TCELL_DN	0.003003	0.0271266	0.533658	2.38189	0	75
GSE13547_CTRL_VS_ANTI_IGM_STIM_ZFX_KO_BCELL_12H_DN	0.00321543	0.0271266	0.489279	2.33387	0	106
DEBIASI_APOPTOSIS_BY_REOVIRUS_INFECTION_DN	0.00423729	0.029015	0.447882	2.32686	0	225
GSE11057_EFF_MEM_VS_CENT_MEM_CD4_TCELL_DN	0.00340136	0.0271266	0.482147	2.31654	0	113
GSE9988_ANTI_TREM1_VS_CTRL_TREATED_MONOCYTES_DN	0.00378788	0.027195	0.461067	2.30969	0	169
V$AP2_Q6_01	0.00373134	0.0271535	0.45816	2.30795	0	173
BIOCARTA_TPO_PATHWAY	0.00242718	0.0271266	0.694403	2.30272	0	22
GSE21033_3H_VS_24H_POLYIC_STIM_DC_UP	0.00325733	0.0271266	0.470618	2.29671	0	118
BIOCARTA_PDGF_PATHWAY	0.00254453	0.0271266	0.645455	2.29125	0	29
ACATATC,MIR-190	0.0027248	0.0271266	0.571315	2.28785	0	45
BIOCARTA_EGF_PATHWAY	0.00255102	0.0271266	0.6553	2.28629	0	28
GSE5503_MLN_DC_VS_PLN_DC_ACTIVATED_ALLOGENIC_TCELL_DN	0.00371747	0.0271266	0.463003	2.28596	0	142
GSE10240_CTRL_VS_IL22_STIM_PRIMARY_BRONCHIAL_EPITHELIAL_CELLS_UP	0.00352113	0.0271266	0.46689	2.28509	0	133
MODULE_257	0.00337838	0.0271266	0.466756	2.28293	0	124
LI_INDUCED_T_TO_NATURAL_KILLER_DN	0.00285714	0.0271266	0.518759	2.2817	0	69
MCBRYAN_PUBERTAL_BREAST_6_7WK_UP	0.00359712	0.0271266	0.466241	2.27313	0	134
GTGTTGA,MIR-505	0.003003	0.0271266	0.50851	2.26965	0	75
KEGG_ENDOMETRIAL_CANCER	0.00280112	0.0271266	0.573841	2.2688	0	44
GO_ODONTOGENESIS	0.00277008	0.0271266	0.58638	2.26068	0	40
STARK_HYPPOCAMPUS_22Q11_DELETION_UP	0.00255754	0.0271266	0.619861	2.25689	0	32
GO_ORGAN_MORPHOGENESIS	0.0049505	0.0312368	0.410241	2.25394	0	357
PLASARI_TGFB1_SIGNALING_VIA_NFIC_1HR_DN	0.00291545	0.0271266	0.524993	2.24653	0	63
GSE9509_10MIN_VS_30MIN_LPS_STIM_IL10_KO_MACROPHAGE_DN	0.00355872	0.0271266	0.458702	2.24287	0	135
PID_IL2_1PATHWAY	0.00280899	0.0271266	0.554325	2.24055	0	48
GSE45837_WT_VS_GFI1_KO_PDC_UP	0.00332226	0.0271266	0.483391	2.23862	0	95
PEREZ_TP53_AND_TP63_TARGETS	0.00310559	0.0271266	0.492212	2.23829	0	83
GO_O_GLYCAN_PROCESSING	0.00252525	0.0271266	0.662818	2.23458	0	25
GO_LIMB_DEVELOPMENT	0.00307692	0.0271266	0.49746	2.23247	0	77
GO_APPENDAGE_DEVELOPMENT	0.00307692	0.0271266	0.49746	2.23247	0	77
GSE37532_VISCERAL_ADIPOSE_TISSUE_VS_LN_DERIVED_PPARG_KO_TREG_CD4_TCELL_DN	0.00334448	0.0271266	0.482958	2.22008	0	93
ACAGGGT,MIR-10A,MIR-10B	0.00308642	0.0271266	0.487544	2.21966	0	81
TTGCACT,MIR-130A,MIR-301,MIR-130B	0.00438596	0.0294881	0.414561	2.21867	0	284
GCM_NCAM1	0.00332226	0.0271266	0.459811	2.21545	0	112
GO_EMBRYONIC_SKELETAL_SYSTEM_MORPHOGENESIS	0.00278552	0.0271266	0.579473	2.21317	0	39
GO_SKELETAL_SYSTEM_MORPHOGENESIS	0.00324675	0.0271266	0.484185	2.21088	0	87
LIN_APC_TARGETS	0.00284091	0.0271266	0.519623	2.21039	0	60
CACTGCC,MIR-34A,MIR-34C,MIR-449	0.00384615	0.027293	0.435664	2.20949	0	184
HALLMARK_UV_RESPONSE_DN	0.0033557	0.0271266	0.48283	2.20935	0	91
V$EGR2_01	0.00330033	0.0271266	0.450633	2.20698	0	123
MEK_UP.V1_UP	0.00319489	0.0271266	0.469586	2.20558	0	99
GO_SMAD_BINDING	0.002849	0.0271266	0.545163	2.2042	0	49
WNT_SIGNALING	0.00280899	0.0271266	0.523452	2.20343	0	55
GSE6259_FLT3L_INDUCED_DEC205_POS_DC_VS_CD8_TCELL_UP	0.00332226	0.0271266	0.475173	2.20056	0	95
GO_TRANSCRIPTION_FACTOR_ACTIVITY_RNA_POLYMERASE_II_CORE_PROMOTER_PROXIMAL_REGION_SEQUENCE_SPECIFIC_BINDING	0.00387597	0.0273553	0.435875	2.19939	0	180
MCBRYAN_PUBERTAL_BREAST_5_6WK_DN	0.00314465	0.0271266	0.466848	2.19744	0	100
GO_EMBRYONIC_MORPHOGENESIS	0.0044843	0.029834	0.416747	2.19625	0	254
GSE21033_1H_VS_24H_POLYIC_STIM_DC_UP	0.00328947	0.0271266	0.449649	2.19286	0	119
BIOCARTA_INSULIN_PATHWAY	0.00239808	0.0271266	0.674532	2.19036	0	20
LUI_THYROID_CANCER_PAX8_PPARG_UP	0.00263158	0.0271266	0.595425	2.18911	0	34
GCM_BMPR2	0.00304878	0.0271266	0.490958	2.18852	0	76
GCM_DEAF1	0.00249377	0.0271266	0.635589	2.18802	0	26
V$AP2ALPHA_01	0.00357143	0.0271266	0.440226	2.18565	0	152
BIOCARTA_ETS_PATHWAY	0.00243309	0.0271266	0.723694	2.18555	0	16
ACCAAAG,MIR-9	0.0049505	0.0312368	0.400189	2.18304	0	343
BIOCARTA_EPO_PATHWAY	0.00240964	0.0271266	0.697834	2.18181	0	18
ATGTACA,MIR-493	0.00434783	0.0294633	0.420423	2.1789	0	224
GO_ODONTOGENESIS_OF_DENTIN_CONTAINING_TOOTH	0.00246914	0.0271266	0.602597	2.17725	0	30
CCCAGAG,MIR-326	0.00338983	0.0271266	0.472259	2.17567	0	94
GSE5589_WT_VS_IL6_KO_LPS_AND_IL6_STIM_MACROPHAGE_45MIN_DN	0.00324675	0.0271266	0.445452	2.17323	0	117
V$AP2GAMMA_01	0.00357143	0.0271266	0.437646	2.17284	0	152
BIOCARTA_IGF1_PATHWAY	0.00239808	0.0271266	0.668902	2.17208	0	20
PID_PDGFRA_PATHWAY	0.00240964	0.0271266	0.694387	2.17103	0	18
BIOCARTA_IL2_PATHWAY	0.00238663	0.0271266	0.682615	2.17031	0	19
AAGCACA,MIR-218	0.00446429	0.0297597	0.415453	2.16723	0	242
LEIN_CEREBELLUM_MARKERS	0.00275482	0.0271266	0.572664	2.16712	0	37
KEGG_NON_SMALL_CELL_LUNG_CANCER	0.0027248	0.0271266	0.540707	2.16528	0	45
GSE8621_UNSTIM_VS_LPS_PRIMED_AND_LPS_STIM_MACROPHAGE_DN	0.00355872	0.0271266	0.435851	2.16212	0	147
GO_EMBRYONIC_SKELETAL_SYSTEM_DEVELOPMENT	0.00283286	0.0271266	0.5251	2.16181	0	52
GSE13522_CTRL_VS_T_CRUZI_Y_STRAIN_INF_SKIN_BALBC_MOUSE_DN	0.0031348	0.0271266	0.474985	2.1584	0	82
HALLMARK_WNT_BETA_CATENIN_SIGNALING	0.00254453	0.0271266	0.607426	2.15626	0	29
GSE39556_UNTREATED_VS_3H_POLYIC_INJ_MOUSE_NK_CELL_DN	0.00357143	0.0271266	0.433222	2.15087	0	152
GO_METANEPHROS_DEVELOPMENT	0.00246914	0.0271266	0.594885	2.14939	0	30
GO_POSITIVE_REGULATION_OF_NEURON_PROJECTION_DEVELOPMENT	0.00359712	0.0271266	0.438126	2.14761	0	138
GSE27241_WT_VS_RORGT_KO_TH17_POLARIZED_CD4_TCELL_TREATED_WITH_DIGOXIN_UP	0.00359712	0.0271266	0.432767	2.14252	0	151
MODULE_66	0.00438596	0.0294881	0.411619	2.14135	0	232
REACTOME_O_LINKED_GLYCOSYLATION_OF_MUCINS	0.00242718	0.0271266	0.645735	2.14134	0	22
GO_RNA_POLYMERASE_II_TRANSCRIPTION_FACTOR_ACTIVITY_SEQUENCE_SPECIFIC_DNA_BINDING	0.00462963	0.030421	0.392907	2.14041	0	332
GO_SKELETAL_SYSTEM_DEVELOPMENT	0.00390625	0.0274818	0.413241	2.13689	0	206
GCAAAAA,MIR-129	0.0033557	0.0271266	0.436095	2.1357	0	125
MODULE_100	0.0042735	0.0291881	0.410446	2.13425	0	226
GO_KIDNEY_MORPHOGENESIS	0.00254453	0.0271266	0.601017	2.13351	0	29
GO_EMBRYONIC_CRANIAL_SKELETON_MORPHOGENESIS	0.00247525	0.0271266	0.639349	2.1314	0	23
GO_TRANSCRIPTIONAL_ACTIVATOR_ACTIVITY_RNA_POLYMERASE_II_CORE_PROMOTER_PROXIMAL_REGION_SEQUENCE_SPECIFIC_BINDING	0.00330033	0.0271266	0.44024	2.13053	0	114
PID_HES_HEY_PATHWAY	0.0027248	0.0271266	0.573452	2.12949	0	35
CHARAFE_BREAST_CANCER_LUMINAL_VS_BASAL_UP	0.00442478	0.0296594	0.411824	2.12537	0	229
GSE5099_UNSTIM_VS_MCSF_TREATED_MONOCYTE_DAY3_DN	0.00357143	0.0271266	0.429111	2.12526	0	149
OUYANG_PROSTATE_CANCER_PROGRESSION_UP	0.00243309	0.0271266	0.703448	2.1244	0	16
GO_AMINOGLYCAN_BIOSYNTHETIC_PROCESS	0.002849	0.0271266	0.525331	2.12401	0	49
MODULE_220	0.003367	0.0271266	0.464415	2.12384	0	90
GTGCAAA,MIR-507	0.00315457	0.0271266	0.463068	2.12153	0	86
GSE27896_HDAC6_KO_VS_WT_TREG_UP	0.00355872	0.0271266	0.433772	2.12097	0	135
GSE16385_ROSIGLITAZONE_IL4_VS_IL4_ALONE_STIM_MACROPHAGE_12H_DN	0.00353357	0.0271266	0.425245	2.11859	0	153
GO_CELL_MORPHOGENESIS_INVOLVED_IN_DIFFERENTIATION	0.00438596	0.0294881	0.407183	2.11827	0	232
PEREZ_TP63_TARGETS	0.00357143	0.0271266	0.427306	2.11631	0	149
GSE36476_CTRL_VS_TSST_ACT_40H_MEMORY_CD4_TCELL_OLD_UP	0.00330033	0.0271266	0.432097	2.11619	0	123
GO_ARTERY_MORPHOGENESIS	0.00248756	0.0271266	0.631992	2.1144	0	24
GO_RESPONSE_TO_STEROL	0.00243902	0.0271266	0.715758	2.11412	0	15
CACCAGC,MIR-138	0.00357143	0.0271266	0.426627	2.11295	0	149
CTCAGGG,MIR-125B,MIR-125A	0.00438596	0.0294881	0.405906	2.11181	0	233
GSE18281_PERIMEDULLARY_CORTICAL_REGION_VS_WHOLE_MEDULLA_THYMUS_UP	0.00331126	0.0271266	0.435468	2.10914	0	115
GSE16450_IMMATURE_VS_MATURE_NEURON_CELL_LINE_UP	0.0035461	0.0271266	0.429121	2.10735	0	137
GO_FORMATION_OF_PRIMARY_GERM_LAYER	0.0027248	0.0271266	0.526157	2.10701	0	45
KINSEY_TARGETS_OF_EWSR1_FLII_FUSION_DN	0.003861	0.027293	0.41627	2.10693	0	183
CACTGTG,MIR-128A,MIR-128B	0.00436681	0.0294633	0.403714	2.10462	0	234
REACTOME_PI_METABOLISM	0.00277008	0.0271266	0.545801	2.10424	0	40
SENESE_HDAC1_TARGETS_DN	0.00357143	0.0271266	0.424197	2.1041	0	145
GSE3920_IFNA_VS_IFNG_TREATED_FIBROBLAST_UP	0.00324675	0.0271266	0.430405	2.1027	0	121
KEGG_ALDOSTERONE_REGULATED_SODIUM_REABSORPTION	0.00247525	0.0271266	0.630563	2.10211	0	23
LAIHO_COLORECTAL_CANCER_SERRATED_DN	0.00297619	0.0271266	0.474066	2.10201	0	72
GO_KERATAN_SULFATE_BIOSYNTHETIC_PROCESS	0.00243902	0.0271266	0.711471	2.10145	0	15
GO_TRANSMEMBRANE_RECEPTOR_PROTEIN_KINASE_ACTIVITY	0.00257732	0.0271266	0.583191	2.0993	0	31
GSE16266_CTRL_VS_LPS_STIM_MEF_UP	0.00361011	0.0271266	0.423149	2.0982	0	143
GO_R_SMAD_BINDING	0.00243902	0.0271266	0.70943	2.09543	0	15
GSE14699_NAIVE_VS_DELETIONAL_TOLERANCE_CD8_TCELL_DN	0.00324675	0.0271266	0.428727	2.09451	0	121
ZHANG_TLX_TARGETS_36HR_UP	0.00357143	0.0271266	0.421613	2.09324	0	152
REACTOME_BMAL1_CLOCK_NPAS2_ACTIVATES_CIRCADIAN_EXPRESSION	0.00247525	0.0271266	0.627173	2.0908	0	23
GSE31082_CD4_VS_CD8_SP_THYMOCYTE_UP	0.00367647	0.0271266	0.420367	2.08835	0	156
BHAT_ESR1_TARGETS_NOT_VIA_AKT1_DN	0.0028169	0.0271266	0.519956	2.08748	0	46
TGAATGT,MIR-181A,MIR-181B,MIR-181C,MIR-181D	0.0046729	0.0305998	0.383314	2.08342	0	327
BRACHAT_RESPONSE_TO_METHOTREXATE_UP	0.00239808	0.0271266	0.641373	2.08269	0	20
GSE15930_NAIVE_VS_48H_IN_VITRO_STIM_IFNAB_CD8_TCELL_UP	0.00342466	0.0271266	0.425658	2.08145	0	126
PIGF_UP.V1_DN	0.00310559	0.0271266	0.457334	2.07969	0	83
GO_ALCOHOL_BINDING	0.00280112	0.0271266	0.525661	2.07831	0	44
GSE13738_RESTING_VS_BYSTANDER_ACTIVATED_CD4_TCELL_UP	0.00328947	0.0271266	0.424709	2.07582	0	122
GO_GASTRULATION	0.00292398	0.0271266	0.469014	2.07559	0	71
GO_REGULATION_OF_NEURON_PROJECTION_DEVELOPMENT	0.00408163	0.0283863	0.399293	2.07558	0	215
GO_POSITIVE_REGULATION_OF_AXONOGENESIS	0.00273973	0.0271266	0.531762	2.07434	0	41
GO_TUBE_MORPHOGENESIS	0.0037037	0.0271266	0.410388	2.07358	0	174
V$FREAC2_01	0.00367647	0.0271266	0.423264	2.07313	0	140
GSE9988_ANTI_TREM1_VS_VEHICLE_TREATED_MONOCYTES_DN	0.00367647	0.0271266	0.414577	2.07298	0	162
GSE18281_SUBCAPSULAR_CORTICAL_REGION_VS_WHOLE_MEDULLA_THYMUS_UP	0.00355872	0.0271266	0.423441	2.07247	0	136
GO_REGULATION_OF_NEURON_DIFFERENTIATION	0.00436681	0.0294633	0.38921	2.07219	0	276
GO_MESODERM_MORPHOGENESIS	0.00254453	0.0271266	0.583254	2.07045	0	29
GUO_HEX_TARGETS_UP	0.0028169	0.0271266	0.487553	2.0694	0	59
GCM_RAN	0.00371747	0.0271266	0.407506	2.06917	0	178
LUI_THYROID_CANCER_CLUSTER_1	0.00277008	0.0271266	0.536061	2.06669	0	40
GO_REGULATION_OF_RHO_PROTEIN_SIGNAL_TRANSDUCTION	0.00283286	0.0271266	0.482772	2.06532	0	62
GSE40655_FOXO1_KO_VS_WT_NTREG_UP	0.003663	0.0271266	0.412512	2.06502	0	164
GO_ENDOCHONDRAL_BONE_MORPHOGENESIS	0.002457	0.0271266	0.635048	2.06501	0	21
TGCACTG,MIR-148A,MIR-152,MIR-148B	0.00404858	0.02823	0.398503	2.06492	0	210
BIOCARTA_GLEEVEC_PATHWAY	0.00247525	0.0271266	0.618962	2.06343	0	23
CAGCCTC,MIR-485-5P	0.003367	0.0271266	0.451231	2.06103	0	89
GSE40068_CXCR5POS_BCL6POS_TFH_VS_CXCR5NEG_BCL6NEG_CD4_TCELL_DN	0.00367647	0.0271266	0.42079	2.06101	0	140
GCM_PTPRD	0.0027248	0.0271266	0.514436	2.06007	0	45
GSE7219_UNSTIM_VS_LPS_AND_ANTI_CD40_STIM_DC_UP	0.0033557	0.0271266	0.42034	2.05854	0	125
MODULE_137	0.00436681	0.0294633	0.398282	2.05841	0	228
GCM_MYST2	0.00361011	0.0271266	0.409709	2.0567	0	165
ELVIDGE_HYPOXIA_UP	0.00340136	0.0271266	0.427528	2.05412	0	113
GO_STEROID_BINDING	0.00277008	0.0271266	0.53278	2.05404	0	40
SESTO_RESPONSE_TO_UV_C5	0.00277008	0.0271266	0.532757	2.05395	0	40
GSE7831_1H_VS_4H_INFLUENZA_STIM_PDC_DN	0.00353357	0.0271266	0.421287	2.05174	0	128
GSE369_PRE_VS_POST_IL6_INJECTION_IFNG_WT_LIVER_DN	0.00358423	0.0271266	0.411051	2.0517	0	155
GO_TISSUE_MORPHOGENESIS	0.00452489	0.0299095	0.39318	2.05158	0	247
WEIGEL_OXIDATIVE_STRESS_RESPONSE	0.00254453	0.0271266	0.57786	2.0513	0	29
GO_BODY_MORPHOGENESIS	0.00242718	0.0271266	0.618262	2.05023	0	22
GO_PLASMA_MEMBRANE_RAFT	0.00271739	0.0271266	0.51809	2.04937	0	43
GO_REGULATION_OF_RAS_PROTEIN_SIGNAL_TRANSDUCTION	0.00332226	0.0271266	0.425208	2.04872	0	112
GSE21546_WT_VS_SAP1A_KO_AND_ELK1_KO_DP_THYMOCYTES_DN	0.00342466	0.0271266	0.41884	2.04811	0	126
GCM_RAB10	0.00358423	0.0271266	0.409891	2.04633	0	158
V$TFIII_Q6	0.00321543	0.0271266	0.428698	2.0449	0	106
GSE9988_ANTI_TREM1_AND_LPS_VS_CTRL_TREATED_MONOCYTES_DN	0.00371747	0.0271266	0.402658	2.04456	0	178
GO_REGULATION_OF_POSTTRANSCRIPTIONAL_GENE_SILENCING	0.00243902	0.0271266	0.691648	2.0429	0	15
GO_REGULATION_OF_GENE_SILENCING_BY_RNA	0.00243902	0.0271266	0.691648	2.0429	0	15
GTGCAAT,MIR-25,MIR-32,MIR-92,MIR-363,MIR-367	0.0041841	0.0287245	0.393192	2.04083	0	217
AGGGCAG,MIR-18A	0.00324675	0.0271266	0.446815	2.04024	0	87
GO_MESONEPHROS_DEVELOPMENT	0.00275482	0.0271266	0.538738	2.03873	0	37
VERRECCHIA_DELAYED_RESPONSE_TO_TGFB1	0.00488998	0.0312242	0.663699	2.03817	1	17
GO_ACETYL_COA_METABOLIC_PROCESS	0.00488998	0.0312242	0.661901	2.03265	1	17
V$FREAC4_01	0.00290698	0.0271266	0.460828	2.0301	0	70
GSE4748_CTRL_VS_LPS_STIM_DC_3H_UP	0.00342466	0.0271266	0.415096	2.0298	0	126
GSE21063_WT_VS_NFATC1_KO_8H_ANTI_IGM_STIM_BCELL_DN	0.0035461	0.0271266	0.402411	2.02754	0	166
GO_CARTILAGE_DEVELOPMENT	0.00278552	0.0271266	0.473673	2.0271	0	61
GSE42021_TCONV_PLN_VS_TREG_PRECURSORS_THYMUS_UP	0.00359712	0.0271266	0.413119	2.02503	0	138
GO_REGULATION_OF_PLASMA_LIPOPROTEIN_PARTICLE_LEVELS	0.00249377	0.0271266	0.588206	2.02491	0	26
WEST_ADRENOCORTICAL_CARCINOMA_VS_ADENOMA_DN	0.00243902	0.0271266	0.685217	2.02391	0	15
V$VDR_Q3	0.00328947	0.0271266	0.415369	2.02361	0	120
GO_REGULATION_OF_NERVOUS_SYSTEM_DEVELOPMENT	0.00518135	0.0316601	0.369461	2.02299	0	362
GSE369_PRE_VS_POST_IL6_INJECTION_SOCS3_KO_LIVER_DN	0.00378788	0.027195	0.403435	2.02099	0	169
GO_RNA_POLYMERASE_II_TRANSCRIPTION_COACTIVATOR_ACTIVITY	0.00242718	0.0271266	0.6092	2.02018	0	22
PID_FCER1_PATHWAY	0.00275482	0.0271266	0.491677	2.01712	0	50
HALLMARK_ESTROGEN_RESPONSE_EARLY	0.00332226	0.0271266	0.41794	2.01371	0	112
GSE12845_IGD_POS_BLOOD_VS_DARKZONE_GC_TONSIL_BCELL_UP	0.00355872	0.0271266	0.411733	2.01321	0	135
PID_ARF6_TRAFFICKING_PATHWAY	0.00493827	0.0312368	0.55585	2.00835	1	30
GO_REGULATION_OF_KIDNEY_DEVELOPMENT	0.00488998	0.0312242	0.653708	2.00749	1	17
ZHU_CMV_8_HR_DN	0.00255754	0.0271266	0.550961	2.00602	0	32
MARTORIATI_MDM4_TARGETS_FETAL_LIVER_DN	0.00518135	0.0316601	0.362618	2.00564	0	394
GSE33162_UNTREATED_VS_4H_LPS_STIM_HDAC3_HET_MACROPHAGE_DN	0.00371747	0.0271266	0.40604	2.00472	0	142
GO_RHO_GUANYL_NUCLEOTIDE_EXCHANGE_FACTOR_ACTIVITY	0.00271739	0.0271266	0.505985	2.00149	0	43
RUAN_RESPONSE_TO_TROGLITAZONE_UP	0.00243902	0.0271266	0.677583	2.00136	0	15
GO_PRESYNAPTIC_MEMBRANE	0.00243902	0.0271266	0.677112	1.99997	0	15
GO_POSITIVE_REGULATION_OF_CELL_MORPHOGENESIS_INVOLVED_IN_DIFFERENTIATION	0.00328947	0.0271266	0.430376	1.99931	0	97
KEGG_CHRONIC_MYELOID_LEUKEMIA	0.00291545	0.0271266	0.467144	1.99899	0	63
GSE9509_LPS_VS_LPS_AND_IL10_STIM_IL10_KO_MACROPHAGE_10MIN_UP	0.00320513	0.0271266	0.424628	1.99858	0	101
GCM_MAP4K4	0.00357143	0.0271266	0.402096	1.9952	0	148
BIOCARTA_NGF_PATHWAY	0.00243309	0.0271266	0.659663	1.99217	0	16
GO_PROTEOGLYCAN_METABOLIC_PROCESS	0.00273973	0.0271266	0.509964	1.98931	0	41
HENDRICKS_SMARCA4_TARGETS_UP	0.00275482	0.0271266	0.52563	1.98913	0	37
GSE40666_NAIVE_VS_EFFECTOR_CD8_TCELL_UP	0.00357143	0.0271266	0.400684	1.9882	0	148
GCACCTT,MIR-18A,MIR-18B	0.00315457	0.0271266	0.43391	1.98794	0	86
GO_TRANSCRIPTIONAL_REPRESSOR_ACTIVITY_RNA_POLYMERASE_II_ACTIVATING_TRANSCRIPTION_FACTOR_BINDING	0.00508906	0.0316393	0.559921	1.98762	1	29
REACTOME_NEUROTRANSMITTER_RECEPTOR_BINDING_AND_DOWNSTREAM_TRANSMISSION_IN_THE_POSTSYNAPTIC_CELL	0.00280112	0.0271266	0.471478	1.98739	0	58
GCM_NUMA1	0.00280899	0.0271266	0.491656	1.98724	0	48
BHAT_ESR1_TARGETS_VIA_AKT1_UP	0.00357143	0.0271266	0.394031	1.98694	0	167
GSE25123_WT_VS_PPARG_KO_MACROPHAGE_ROSIGLITAZONE_STIM_UP	0.00342466	0.0271266	0.406159	1.9861	0	126
GO_ADHERENS_JUNCTION_ASSEMBLY	0.004914	0.0312368	0.61075	1.986	1	21
GO_TRANSCRIPTIONAL_ACTIVATOR_ACTIVITY_RNA_POLYMERASE_II_TRANSCRIPTION_REGULATORY_REGION_SEQUENCE_SPECIFIC_BINDING	0.00364964	0.0271266	0.398031	1.98512	0	159
GSE5542_UNTREATED_VS_IFNA_TREATED_EPITHELIAL_CELLS_24H_UP	0.00358423	0.0271266	0.39768	1.98465	0	157
GO_CORE_PROMOTER_SEQUENCE_SPECIFIC_DNA_BINDING	0.00289855	0.0271266	0.459107	1.98437	0	66
PASINI_SUZ12_TARGETS_DN	0.00392157	0.0274881	0.39254	1.98418	0	185
GO_STEROID_HORMONE_RECEPTOR_ACTIVITY	0.00501253	0.0314202	0.569226	1.98383	1	27
ACOSTA_PROLIFERATION_INDEPENDENT_MYC_TARGETS_UP	0.00285714	0.0271266	0.450835	1.98294	0	69
PID_ECADHERIN_KERATINOCYTE_PATHWAY	0.00243309	0.0271266	0.656471	1.98253	0	16
CCCNNGGGAR_V$OLF1_01	0.00380228	0.027195	0.392496	1.98228	0	177
GO_CELL_SUBSTRATE_ADHESION	0.00290698	0.0271266	0.449969	1.98226	0	70
LEF1_UP.V1_UP	0.00307692	0.0271266	0.441656	1.98204	0	77
GSE40274_FOXP3_VS_FOXP3_AND_GATA1_TRANSDUCED_ACTIVATED_CD4_TCELL_DN	0.00352113	0.0271266	0.404901	1.9817	0	133
GO_ARTERY_DEVELOPMENT	0.00268817	0.0271266	0.501766	1.98109	0	42
AMUNDSON_POOR_SURVIVAL_AFTER_GAMMA_RADIATION_8G	0.00292398	0.0271266	0.447562	1.98066	0	71
GSE21033_CTRL_VS_POLYIC_STIM_DC_6H_DN	0.00324675	0.0271266	0.416048	1.97966	0	105
GO_POSITIVE_REGULATION_OF_NEURON_DIFFERENTIATION	0.00361011	0.0271266	0.392398	1.97936	0	168
GSE8515_IL1_VS_IL6_4H_STIM_MAC_DN	0.00307692	0.0271266	0.440211	1.97833	0	78
GSE12845_NAIVE_VS_DARKZONE_GC_TONSIL_BCELL_UP	0.0035461	0.0271266	0.406055	1.978	0	129
GSE16450_IMMATURE_VS_MATURE_NEURON_CELL_LINE_6H_IFNA_STIM_UP	0.00334448	0.0271266	0.43026	1.97784	0	93
IKEDA_MIR30_TARGETS_UP	0.00328947	0.0271266	0.426199	1.97729	0	96
GO_EMBRYONIC_ORGAN_DEVELOPMENT	0.00383142	0.0272718	0.387484	1.97715	0	191
GSE31082_DN_VS_CD8_SP_THYMOCYTE_DN	0.00361011	0.0271266	0.399419	1.97713	0	150
chr7q34	0.004914	0.0312368	0.607985	1.97701	1	21
GO_CELLULAR_GLUCOSE_HOMEOSTASIS	0.00271739	0.0271266	0.499764	1.97688	0	43
GO_HORMONE_MEDIATED_SIGNALING_PATHWAY	0.00334448	0.0271266	0.430809	1.97482	0	92
GCM_GSPT1	0.00357143	0.0271266	0.397709	1.97456	0	152
ATGCTGC,MIR-103,MIR-107	0.00358423	0.0271266	0.398549	1.97387	0	146
PID_AJDISS_2PATHWAY	0.00493827	0.0312368	0.545841	1.97218	1	30
GCM_UBE2N	0.00357143	0.0271266	0.397329	1.97155	0	148
GSE10240_IL17_VS_IL17_AND_IL22_STIM_PRIMARY_BRONCHIAL_EPITHELIAL_CELLS_DN	0.00328947	0.0271266	0.404542	1.97086	0	120
GO_TRANSCRIPTIONAL_REPRESSOR_ACTIVITY_RNA_POLYMERASE_II_TRANSCRIPTION_REGULATORY_REGION_SEQUENCE_SPECIFIC_BINDING	0.00320513	0.0271266	0.418715	1.97075	0	101
MCCLUNG_DELTA_FOSB_TARGETS_8WK	0.00255754	0.0271266	0.541094	1.9701	0	32
MILI_PSEUDOPODIA_CHEMOTAXIS_DN	0.00510204	0.0316393	0.360086	1.97001	0	352
VERHAAK_GLIOBLASTOMA_CLASSICAL	0.00314465	0.0271266	0.418519	1.96995	0	100
GO_REGULATION_OF_CELL_DEVELOPMENT	0.0052356	0.0318022	0.351259	1.96934	0	425
V$MYB_Q6	0.0035461	0.0271266	0.400738	1.96796	0	137
GSE34205_HEALTHY_VS_RSV_INF_INFANT_PBMC_UP	0.00355872	0.0271266	0.402147	1.96634	0	135
GO_REGULATION_OF_OSSIFICATION	0.00308642	0.0271266	0.431615	1.96503	0	81
GO_POSITIVE_REGULATION_OF_DENDRITE_MORPHOGENESIS	0.00497512	0.0312444	0.586985	1.96382	1	24
SENESE_HDAC1_AND_HDAC2_TARGETS_DN	0.00323625	0.0271266	0.4132	1.96301	0	103
HALLMARK_KRAS_SIGNALING_DN	0.00280899	0.0271266	0.466154	1.96224	0	55
GO_MULTICELLULAR_ORGANISMAL_RESPONSE_TO_STRESS	0.00728155	0.0382698	0.591389	1.96112	2	22
GABRIELY_MIR21_TARGETS	0.00438596	0.0294881	0.376751	1.96013	0	233
V$SRY_02	0.00355872	0.0271266	0.400515	1.95836	0	135
GO_FORELIMB_MORPHOGENESIS	0.00486618	0.0312242	0.648296	1.95784	1	16
GO_NEURON_PROJECTION_MORPHOGENESIS	0.00392157	0.0274881	0.387283	1.9576	0	185
GO_CELL_JUNCTION_ORGANIZATION	0.0031348	0.0271266	0.430614	1.95677	0	82
REACTOME_SIGNALING_BY_FGFR1_FUSION_MUTANTS	0.00481928	0.0311304	0.625798	1.95658	1	18
GSE41867_NAIVE_VS_DAY6_LCMV_EFFECTOR_CD8_TCELL_DN	0.00357143	0.0271266	0.387982	1.95644	0	167
AACTGAC,MIR-223	0.0030303	0.0271266	0.439437	1.9559	0	74
GO_CELL_MORPHOGENESIS_INVOLVED_IN_NEURON_DIFFERENTIATION	0.00361011	0.0271266	0.389425	1.95488	0	165
GO_REGULATION_OF_CELL_MORPHOGENESIS_INVOLVED_IN_DIFFERENTIATION	0.00380228	0.027195	0.389608	1.95457	0	172
GO_REGULATION_OF_STEROID_BIOSYNTHETIC_PROCESS	0.00497512	0.0312444	0.584187	1.95446	1	24
GCM_RAP2A	0.00515464	0.0316418	0.542151	1.95157	1	31
PID_ECADHERIN_STABILIZATION_PATHWAY	0.0074813	0.0387847	0.566133	1.94892	2	26
FALVELLA_SMOKERS_WITH_LUNG_CANCER	0.00275482	0.0271266	0.474902	1.9483	0	50
CSR_LATE_UP.V1_DN	0.0033557	0.0271266	0.425558	1.94728	0	91
VANTVEER_BREAST_CANCER_BRCA1_DN	0.00501253	0.0314202	0.558647	1.94696	1	27
REACTOME_PRE_NOTCH_EXPRESSION_AND_PROCESSING	0.00261097	0.0271266	0.532043	1.94677	0	33
GTGCCTT,MIR-506	0.00578035	0.0333784	0.340628	1.94677	0	498
GO_PROTEIN_LIPID_COMPLEX_SUBUNIT_ORGANIZATION	0.00479616	0.0310563	0.599503	1.94673	1	20
BILBAN_B_CLL_LPL_UP	0.00280899	0.0271266	0.467709	1.94639	0	53
GSE26488_CTRL_VS_PEPTIDE_INJECTION_OT2_THYMOCYTE_DN	0.00371747	0.0271266	0.394224	1.94638	0	142
TGFB_UP.V1_UP	0.00326797	0.0271266	0.412735	1.94582	0	102
GSE13485_DAY3_VS_DAY21_YF17D_VACCINE_PBMC_UP	0.00362319	0.0271266	0.388972	1.94545	0	161
V$PTF1BETA_Q6	0.00328947	0.0271266	0.397961	1.94508	0	122
GSE24671_CTRL_VS_SENDAI_VIRUS_INFECTED_MOUSE_SPLENOCYTES_DN	0.00361011	0.0271266	0.38746	1.94501	0	165
HORTON_SREBF_TARGETS	0.0049505	0.0312368	0.58304	1.94368	1	23
GO_CELLULAR_RESPONSE_TO_CARBOHYDRATE_STIMULUS	0.00280112	0.0271266	0.491431	1.94298	0	44
GSE26030_TH1_VS_TH17_RESTIMULATED_DAY5_POST_POLARIZATION_DN	0.00358423	0.0271266	0.389317	1.94291	0	157
REACTOME_KERATAN_SULFATE_KERATIN_METABOLISM	0.00481928	0.0311304	0.621208	1.94223	1	18
GCM_MAP1B	0.00283286	0.0271266	0.471692	1.94193	0	52
GCM_CRKL	0.00284091	0.0271266	0.456443	1.94163	0	60
GSE9988_LOW_LPS_VS_CTRL_TREATED_MONOCYTE_DN	0.00380228	0.027195	0.384298	1.94088	0	177
CTGAGCC,MIR-24	0.00358423	0.0271266	0.39167	1.9398	0	146
GO_INTRACELLULAR_LIPID_TRANSPORT	0.00486618	0.0312242	0.642177	1.93937	1	16
MCBRYAN_PUBERTAL_BREAST_3_4WK_UP	0.0033557	0.0271266	0.423765	1.93907	0	91
KEGG_GLIOMA	0.00280112	0.0271266	0.478887	1.93864	0	47
V$AHRARNT_01	0.00307692	0.0271266	0.423413	1.93847	0	84
CCTGCTG,MIR-214	0.00378788	0.027195	0.386674	1.93702	0	169
TGCTTTG,MIR-330	0.0041841	0.0287245	0.372971	1.93587	0	217
GSE40068_CXCR5POS_BCL6POS_TFH_VS_CXCR5NEG_BCL6NEG_CD4_TCELL_UP	0.00367647	0.0271266	0.389549	1.93525	0	156
ATGTAGC,MIR-221,MIR-222	0.00315457	0.0271266	0.422311	1.9348	0	86
GO_MAIN_AXON	0.00728155	0.0382698	0.582419	1.93137	2	22
AGGCACT,MIR-515-3P	0.00283286	0.0271266	0.451399	1.9311	0	62
CTGYNNCTYTAA_UNKNOWN	0.00271739	0.0271266	0.488098	1.93074	0	43
PID_BETA_CATENIN_NUC_PATHWAY	0.0028169	0.0271266	0.480831	1.9304	0	46
GO_CONNECTIVE_TISSUE_DEVELOPMENT	0.00314465	0.0271266	0.420545	1.92818	0	85
ELVIDGE_HIF1A_AND_HIF2A_TARGETS_DN	0.00289017	0.0271266	0.446615	1.92797	0	65
GSE32423_MEMORY_VS_NAIVE_CD8_TCELL_DN	0.00367647	0.0271266	0.385535	1.92776	0	162
REACTOME_TRAFFICKING_OF_AMPA_RECEPTORS	0.00487805	0.0312242	0.652602	1.92757	1	15
GO_ACTIVATION_OF_MAPKK_ACTIVITY	0.00273224	0.0271266	0.511767	1.92718	0	36
GO_NEPHRON_EPITHELIUM_DEVELOPMENT	0.00515464	0.0316418	0.535296	1.92689	1	31
GSE39556_UNTREATED_VS_3H_POLYIC_INJ_MOUSE_CD8A_DC_DN	0.00367647	0.0271266	0.387758	1.92636	0	156
GO_LIPID_HOMEOSTASIS	0.00291545	0.0271266	0.450212	1.92599	0	64
GSE12845_IGD_NEG_BLOOD_VS_NAIVE_TONSIL_BCELL_DN	0.00357143	0.0271266	0.388808	1.92564	0	149
GTACTGT,MIR-101	0.00378788	0.027195	0.3807	1.9256	0	179
CHIARADONNA_NEOPLASTIC_TRANSFORMATION_KRAS_CDC25_DN	0.00737101	0.038407	0.592166	1.92557	2	21
CTATGCA,MIR-153	0.00357143	0.0271266	0.388721	1.92521	0	149
GO_DIGESTIVE_SYSTEM_PROCESS	0.00479616	0.0310563	0.592795	1.92495	1	20
GO_MORPHOGENESIS_OF_AN_EPITHELIUM	0.004	0.027979	0.377936	1.92473	0	197
DAUER_STAT3_TARGETS_UP	0.00501253	0.0314202	0.552117	1.9242	1	27
GO_REGULATION_OF_AXONOGENESIS	0.00307692	0.0271266	0.428158	1.92416	0	78
REACTOME_IL_RECEPTOR_SHC_SIGNALING	0.00477327	0.0309984	0.604833	1.92301	1	19
GO_BONE_DEVELOPMENT	0.00304878	0.0271266	0.431332	1.92273	0	76
V$SP1_Q2_01	0.00358423	0.0271266	0.385185	1.92229	0	157
GO_EMBRYONIC_ORGAN_MORPHOGENESIS	0.00328947	0.0271266	0.394205	1.9205	0	120
TGCTGCT,MIR-15A,MIR-16,MIR-15B,MIR-195,MIR-424,MIR-497	0.00510204	0.0316393	0.345325	1.91952	0	399
CAMP_UP.V1_DN	0.00357143	0.0271266	0.386772	1.91926	0	144
V$FOXO4_02	0.00357143	0.0271266	0.386577	1.91829	0	144
GO_CELL_MATRIX_ADHESION	0.00282486	0.0271266	0.468224	1.91672	0	51
BHAT_ESR1_TARGETS_NOT_VIA_AKT1_UP	0.00340136	0.0271266	0.398661	1.91542	0	113
GO_CORE_PROMOTER_BINDING	0.00323625	0.0271266	0.402584	1.9153	0	104
HALLMARK_HEDGEHOG_SIGNALING	0.00477327	0.0309984	0.602106	1.91434	1	19
ATAGGAA,MIR-202	0.00304878	0.0271266	0.429429	1.91424	0	76
GSE22103_LPS_VS_GMCSF_AND_IFNG_STIM_NEUTROPHIL_DN	0.00361011	0.0271266	0.381131	1.91297	0	163
BIOCARTA_GH_PATHWAY	0.00742574	0.0386168	0.573793	1.91285	2	23
GO_MORPHOGENESIS_OF_A_BRANCHING_STRUCTURE	0.00297619	0.0271266	0.431396	1.91281	0	72
SIMBULAN_UV_RESPONSE_NORMAL_DN	0.00479616	0.0310563	0.58899	1.91259	1	20
GU_PDEF_TARGETS_UP	0.00515464	0.0316418	0.531121	1.91186	1	31
GO_KIDNEY_EPITHELIUM_DEVELOPMENT	0.00280899	0.0271266	0.472968	1.91171	0	48
SCHMIDT_POR_TARGETS_IN_LIMB_BUD_UP	0.00728155	0.0382698	0.576342	1.91122	2	22
GSE3039_NKT_CELL_VS_B2_BCELL_UP	0.00352113	0.0271266	0.39047	1.91107	0	133
GO_DOUBLE_STRANDED_DNA_BINDING	0.00584795	0.0335653	0.336329	1.91073	0	490
GO_RNA_POLYMERASE_II_CORE_PROMOTER_SEQUENCE_SPECIFIC_DNA_BINDING	0.0027248	0.0271266	0.514398	1.91019	0	35
GO_MESONEPHRIC_TUBULE_MORPHOGENESIS	0.00477327	0.0309984	0.600487	1.90919	1	19
KEGG_ARRHYTHMOGENIC_RIGHT_VENTRICULAR_CARDIOMYOPATHY_ARVC	0.00493827	0.0312368	0.528321	1.90888	1	30
GAGCCTG,MIR-484	0.00297619	0.0271266	0.430483	1.90876	0	72
GSE22025_TGFB1_VS_TGFB1_AND_PROGESTERONE_TREATED_CD4_TCELL_DN	0.00323625	0.0271266	0.401695	1.90836	0	103
BIOCARTA_GSK3_PATHWAY	0.00728155	0.0382698	0.575395	1.90808	2	22
ZHU_CMV_ALL_DN	0.00277778	0.0271266	0.450475	1.90758	0	57
WELCSH_BRCA1_TARGETS_DN	0.00353357	0.0271266	0.391606	1.90719	0	128
GO_ENDOCRINE_PANCREAS_DEVELOPMENT	0.00487805	0.0312242	0.64569	1.90716	1	15
TGTTTAC,MIR-30A-5P,MIR-30C,MIR-30D,MIR-30B,MIR-30E-5P	0.0049505	0.0312368	0.342312	1.90695	0	398
GO_GOLGI_CISTERNA_MEMBRANE	0.00280899	0.0271266	0.452793	1.906	0	55
GENTILE_UV_RESPONSE_CLUSTER_D8	0.00515464	0.0316418	0.529422	1.90575	1	31
TAAWWATAG_V$RSRFC4_Q2	0.00315457	0.0271266	0.415928	1.90556	0	86
GO_BASOLATERAL_PLASMA_MEMBRANE	0.00332226	0.0271266	0.411126	1.90395	0	95
GSE30962_ACUTE_VS_CHRONIC_LCMV_PRIMARY_INF_CD8_TCELL_UP	0.00371747	0.0271266	0.385541	1.90351	0	142
GO_ORGAN_GROWTH	0.00510204	0.0316393	0.545464	1.90308	1	28
LEIN_OLIGODENDROCYTE_MARKERS	0.00277008	0.0271266	0.493364	1.90208	0	40
V$HNF4_01_B	0.00367647	0.0271266	0.388231	1.90154	0	140
GO_NEPHRON_DEVELOPMENT	0.00280112	0.0271266	0.500529	1.90097	0	38
REACTOME_GLYCOSAMINOGLYCAN_METABOLISM	0.00280899	0.0271266	0.45145	1.90034	0	55
GO_TRANSMEMBRANE_RECEPTOR_PROTEIN_TYROSINE_KINASE_ACTIVITY	0.00479616	0.0310563	0.58518	1.90022	1	20
GO_CLATHRIN_COATED_VESICLE	0.00320513	0.0271266	0.403672	1.89994	0	101
REACTOME_GLUCAGON_SIGNALING_IN_METABOLIC_REGULATION	0.00477327	0.0309984	0.597539	1.89982	1	19
GO_AMINOGLYCAN_METABOLIC_PROCESS	0.003003	0.0271266	0.425611	1.89964	0	75
GO_REGULATION_OF_LIPID_TRANSPORT	0.0027248	0.0271266	0.474179	1.89886	0	45
KEGG_ADHERENS_JUNCTION	0.00282486	0.0271266	0.463788	1.89856	0	51
GTTTGTT,MIR-495	0.00373134	0.0271535	0.37674	1.8978	0	173
TGGTGCT,MIR-29A,MIR-29B,MIR-29C	0.00471698	0.0307709	0.348816	1.89767	0	330
ACTGTGA,MIR-27A,MIR-27B	0.0045045	0.029834	0.350211	1.89726	0	312
GSE24814_STAT5_KO_VS_WT_PRE_BCELL_UP	0.00290698	0.0271266	0.430581	1.89685	0	70
MCLACHLAN_DENTAL_CARIES_DN	0.00268817	0.0271266	0.480402	1.89674	0	42
GO_POSITIVE_REGULATION_OF_CELL_PROJECTION_ORGANIZATION	0.00383142	0.0272718	0.374138	1.89609	0	182
GSE2935_UV_INACTIVATED_VS_LIVE_SENDAI_VIRUS_INF_MACROPHAGE_UP	0.00330033	0.0271266	0.391764	1.89593	0	114
GO_INSULIN_RECEPTOR_BINDING	0.00481928	0.0311304	0.606205	1.89533	1	18
GSE15215_CD2_POS_VS_NEG_PDC_UP	0.00327869	0.0271266	0.397593	1.8952	0	107
GSE15750_DAY6_VS_DAY10_EFF_CD8_TCELL_DN	0.00357143	0.0271266	0.381836	1.89477	0	144
MODULE_11	0.00444444	0.0297165	0.363283	1.89452	0	244
ATAAGCT,MIR-21	0.00308642	0.0271266	0.416082	1.89431	0	81
GO_NEGATIVE_REGULATION_OF_TRANSCRIPTION_FROM_RNA_POLYMERASE_II_PROMOTER	0.00588235	0.0337483	0.334411	1.89425	0	481
GO_CRANIAL_SKELETAL_SYSTEM_DEVELOPMENT	0.00510204	0.0316393	0.542602	1.8931	1	28
V$SOX9_B1	0.00353357	0.0271266	0.379968	1.89301	0	153
ZHANG_TARGETS_OF_EWSR1_FLI1_FUSION	0.00283286	0.0271266	0.442476	1.89293	0	62
GSE45365_HEALTHY_VS_MCMV_INFECTION_CD11B_DC_UP	0.00343643	0.0271266	0.3861	1.89255	0	131
WU_CELL_MIGRATION	0.00307692	0.0271266	0.420798	1.89109	0	78
TTAYRTAA_V$E4BP4_01	0.00367647	0.0271266	0.378195	1.89106	0	162
GSE21063_CTRL_VS_ANTI_IGM_STIM_BCELL_NFATC1_KO_8H_UP	0.00359712	0.0271266	0.381966	1.89102	0	151
BRACHAT_RESPONSE_TO_CISPLATIN	0.00481928	0.0311304	0.604758	1.8908	1	18
AAGCAAT,MIR-137	0.0035461	0.0271266	0.384929	1.89033	0	137
PID_THROMBIN_PAR1_PATHWAY	0.00511509	0.0316418	0.519044	1.88981	1	32
GO_EXTRINSIC_COMPONENT_OF_MEMBRANE	0.0037037	0.0271266	0.378923	1.88951	0	160
GSE3982_MAC_VS_NEUTROPHIL_LPS_STIM_DN	0.00321543	0.0271266	0.396	1.88893	0	106
GO_STEM_CELL_DIFFERENTIATION	0.00304878	0.0271266	0.423731	1.88885	0	76
GO_CELLULAR_RESPONSE_TO_STEROID_HORMONE_STIMULUS	0.00324675	0.0271266	0.386521	1.88831	0	121
GSE7460_FOXP3_MUT_VS_WT_ACT_TCONV_DN	0.00355872	0.0271266	0.385815	1.88831	0	136
V$CREBP1_01	0.00324675	0.0271266	0.38668	1.8865	0	117
GO_REGULATION_OF_SMALL_GTPASE_MEDIATED_SIGNAL_TRANSDUCTION	0.0037594	0.027195	0.373716	1.88615	0	175
GO_CHOLESTEROL_HOMEOSTASIS	0.00493827	0.0312368	0.522005	1.88606	1	30
GO_STEROL_HOMEOSTASIS	0.00493827	0.0312368	0.522005	1.88606	1	30
KEGG_FC_EPSILON_RI_SIGNALING_PATHWAY	0.00282486	0.0271266	0.460572	1.88539	0	51
TGCCTTA,MIR-124A	0.00520833	0.0317668	0.341416	1.8848	0	391
DELASERNA_MYOD_TARGETS_UP	0.00280899	0.0271266	0.447678	1.88446	0	55
BASSO_CD40_SIGNALING_DN	0.00282486	0.0271266	0.460239	1.88403	0	51
SWEET_KRAS_TARGETS_UP	0.00273973	0.0271266	0.482938	1.88388	0	41
V$MEF2_Q6_01	0.00324675	0.0271266	0.385587	1.88375	0	121
GSE15330_LYMPHOID_MULTIPOTENT_VS_MEGAKARYOCYTE_ERYTHROID_PROGENITOR_IKAROS_KO_UP	0.00328947	0.0271266	0.386223	1.88354	0	119
TTTGCAC,MIR-19A,MIR-19B	0.00512821	0.0316418	0.34584	1.88328	0	346
GO_BRANCHING_MORPHOGENESIS_OF_AN_EPITHELIAL_TUBE	0.00278552	0.0271266	0.439975	1.88289	0	61
GSE29164_DAY3_VS_DAY7_UNTREATED_MELANOMA_UP	0.00357143	0.0271266	0.379342	1.88239	0	144
GACAATC,MIR-219	0.00328947	0.0271266	0.405161	1.88217	0	97
HOELZEL_NF1_TARGETS_DN	0.00278552	0.0271266	0.492745	1.88193	0	39
PID_AVB3_INTEGRIN_PATHWAY	0.00273224	0.0271266	0.499743	1.8819	0	36
PID_EPO_PATHWAY	0.00493827	0.0312368	0.520813	1.88176	1	30
REACTOME_L1CAM_INTERACTIONS	0.002849	0.0271266	0.465258	1.88113	0	49
RIZ_ERYTHROID_DIFFERENTIATION_HBZ	0.00479616	0.0310563	0.57925	1.88096	1	20
SCHLESINGER_METHYLATED_DE_NOVO_IN_CANCER	0.00505051	0.0315396	0.557723	1.88027	1	25
GO_TUBE_DEVELOPMENT	0.00438596	0.0294881	0.351158	1.87935	0	284
V$PAX4_01	0.0037037	0.0271266	0.372624	1.87792	0	171
CAIRO_HEPATOBLASTOMA_UP	0.003663	0.0271266	0.375098	1.87772	0	164
PHONG_TNF_RESPONSE_VIA_P38_COMPLETE	0.00378788	0.027195	0.37121	1.8776	0	179
GO_TRANS_GOLGI_NETWORK_TRANSPORT_VESICLE	0.00479616	0.0310563	0.578058	1.87709	1	20
BIOCARTA_MYOSIN_PATHWAY	0.00728155	0.0382698	0.56583	1.87636	2	22
GSE15271_CXCR4_POS_VS_NEG_GC_BCELL_DN	0.0035461	0.0271266	0.384532	1.87629	0	130
FRASOR_TAMOXIFEN_RESPONSE_UP	0.00275482	0.0271266	0.495359	1.87458	0	37
TGTGTGA,MIR-377	0.00343643	0.0271266	0.382429	1.87456	0	131
GSE18203_CTRL_VS_INTRATUMORAL_CPG_INJ_MC38_TUMOR_UP	0.00324675	0.0271266	0.383569	1.87389	0	121
GTACAGG,MIR-486	0.00280112	0.0271266	0.49329	1.87348	0	38
LI_WILMS_TUMOR_VS_FETAL_KIDNEY_2_DN	0.00488998	0.0312242	0.610015	1.87331	1	17
GSE29618_MONOCYTE_VS_PDC_DN	0.00362319	0.0271266	0.374485	1.87299	0	161
PID_AR_PATHWAY	0.00282486	0.0271266	0.457206	1.87161	0	51
GSE40274_FOXP3_VS_FOXP3_AND_PBX1_TRANSDUCED_ACTIVATED_CD4_TCELL_DN	0.00355872	0.0271266	0.382665	1.87108	0	135
GSE21033_1H_VS_12H_POLYIC_STIM_DC_UP	0.0035461	0.0271266	0.384105	1.87107	0	129
GCM_RBM8A	0.003003	0.0271266	0.419156	1.87083	0	75
BIOCARTA_IGF1R_PATHWAY	0.00737101	0.038407	0.575324	1.8708	2	21
V$DR3_Q4	0.0030303	0.0271266	0.420273	1.87061	0	74
GO_CORE_PROMOTER_PROXIMAL_REGION_DNA_BINDING	0.00434783	0.0294633	0.360915	1.87049	0	224
PID_IL3_PATHWAY	0.00728155	0.0382698	0.563975	1.87021	2	22
MCCLUNG_CREB1_TARGETS_DN	0.00263158	0.0271266	0.508578	1.86981	0	34
KEGG_WNT_SIGNALING_PATHWAY	0.00326797	0.0271266	0.396589	1.8697	0	102
GO_CELL_CELL_CONTACT_ZONE	0.00522193	0.0317916	0.510875	1.86932	1	33
PID_LYSOPHOSPHOLIPID_PATHWAY	0.00280112	0.0271266	0.4728	1.86932	0	44
ACTGCCT,MIR-34B	0.00358423	0.0271266	0.374398	1.86846	0	157
DAZARD_RESPONSE_TO_UV_NHEK_DN	0.0045045	0.029834	0.352703	1.86817	0	264
BHAT_ESR1_TARGETS_VIA_AKT1_DN	0.0027248	0.0271266	0.466482	1.86804	0	45
SCHAEFFER_PROSTATE_DEVELOPMENT_6HR_DN	0.00515464	0.0316418	0.338116	1.86757	0	395
V$AFP1_Q6	0.00328947	0.0271266	0.383232	1.86704	0	120
PID_SHP2_PATHWAY	0.00522193	0.0317916	0.51025	1.86703	1	33
GSE13485_DAY7_VS_DAY21_YF17D_VACCINE_PBMC_UP	0.00357143	0.0271266	0.37624	1.86691	0	148
GO_REGULATION_OF_CELLULAR_RESPONSE_TO_GROWTH_FACTOR_STIMULUS	0.00327869	0.0271266	0.391624	1.86675	0	107
V$SPZ1_01	0.00357143	0.0271266	0.376145	1.86575	0	145
DOANE_RESPONSE_TO_ANDROGEN_UP	0.00331126	0.0271266	0.385186	1.8656	0	115
GUO_TARGETS_OF_IRS1_AND_IRS2	0.00297619	0.0271266	0.420465	1.86434	0	72
GO_TUBE_FORMATION	0.0031348	0.0271266	0.410252	1.86424	0	82
GSE3920_UNTREATED_VS_IFNG_TREATED_FIBROBLAST_DN	0.00331126	0.0271266	0.384796	1.86371	0	115
PID_WNT_CANONICAL_PATHWAY	0.00481928	0.0311304	0.595897	1.8631	1	18
GSE20727_CTRL_VS_H2O2_TREATED_DC_UP	0.00358423	0.0271266	0.373074	1.86185	0	157
GO_PANCREAS_DEVELOPMENT	0.00493827	0.0312368	0.515164	1.86135	1	30
INGRAM_SHH_TARGETS_UP	0.00289017	0.0271266	0.431119	1.86107	0	65
GSE22886_CD8_VS_CD4_NAIVE_TCELL_DN	0.00321543	0.0271266	0.390032	1.86046	0	106
TONKS_TARGETS_OF_RUNX1_RUNX1T1_FUSION_ERYTHROCYTE_UP	0.00314465	0.0271266	0.405568	1.85951	0	85
CHANG_CORE_SERUM_RESPONSE_DN	0.00358423	0.0271266	0.372306	1.85945	0	154
KEGG_GLYCOSAMINOGLYCAN_BIOSYNTHESIS_CHONDROITIN_SULFATE	0.00488998	0.0312242	0.605369	1.85904	1	17
GO_RECEPTOR_SIGNALING_PROTEIN_ACTIVITY	0.00323625	0.0271266	0.382594	1.8589	0	116
ACCTGTTG_UNKNOWN	0.00315457	0.0271266	0.405697	1.85869	0	86
GINESTIER_BREAST_CANCER_ZNF217_AMPLIFIED_DN	0.0044843	0.029834	0.349902	1.85867	0	272
GSE32533_WT_VS_MIR17_KO_ACT_CD4_TCELL_UP	0.00323625	0.0271266	0.391161	1.85831	0	103
GO_RAC_GTPASE_BINDING	0.00522193	0.0317916	0.507711	1.85774	1	33
GSE29618_PDC_VS_MDC_DAY7_FLU_VACCINE_UP	0.00358423	0.0271266	0.372241	1.8577	0	157
VART_KSHV_INFECTION_ANGIOGENIC_MARKERS_DN	0.00278552	0.0271266	0.486273	1.85722	0	39
LOPEZ_TRANSLATION_VIA_FN1_SIGNALING	0.00508906	0.0316393	0.52293	1.85631	1	29
BIOCARTA_IL6_PATHWAY	0.00719424	0.0381132	0.571561	1.85599	2	20
GO_MORPHOGENESIS_OF_EMBRYONIC_EPITHELIUM	0.00303951	0.0271266	0.411968	1.85541	0	79
PID_FAK_PATHWAY	0.0028169	0.0271266	0.461974	1.8547	0	46
GARGALOVIC_RESPONSE_TO_OXIDIZED_PHOSPHOLIPIDS_GREEN_DN	0.00719424	0.0381132	0.570838	1.85364	2	20
GSE6259_33D1_POS_VS_DEC205_POS_FLT3L_INDUCED_SPLENIC_DC_UP	0.00327869	0.0271266	0.388206	1.85045	0	107
SOTIRIOU_BREAST_CANCER_GRADE_1_VS_3_DN	0.00271739	0.0271266	0.467701	1.85005	0	43
GO_TRANSCRIPTIONAL_REPRESSOR_ACTIVITY_RNA_POLYMERASE_II_TRANSCRIPTION_FACTOR_BINDING	0.00275482	0.0271266	0.450915	1.84989	0	50
GO_EMBRYO_DEVELOPMENT	0.00564972	0.0329954	0.326717	1.84967	0	469
CAATGCA,MIR-33	0.00284091	0.0271266	0.434785	1.8495	0	60
GO_BRANCHING_INVOLVED_IN_URETERIC_BUD_MORPHOGENESIS	0.00488998	0.0312242	0.602101	1.84901	1	17
GO_POST_EMBRYONIC_DEVELOPMENT	0.00280899	0.0271266	0.444244	1.84874	0	53
BIOCARTA_WNT_PATHWAY	0.00497512	0.0312444	0.552547	1.8486	1	24
GO_REGULATION_OF_LIPID_CATABOLIC_PROCESS	0.00511509	0.0316418	0.507638	1.84828	1	32
RODRIGUES_NTN1_AND_DCC_TARGETS	0.00505051	0.0315396	0.548093	1.8478	1	25
GO_NEURAL_TUBE_DEVELOPMENT	0.00319489	0.0271266	0.393365	1.84758	0	99
KEGG_PROSTATE_CANCER	0.002849	0.0271266	0.425269	1.84747	0	67
KEGG_MELANOGENESIS	0.00280899	0.0271266	0.438634	1.84639	0	55
GO_BETA_CATENIN_BINDING	0.00282486	0.0271266	0.450948	1.846	0	51
PID_SMAD2_3NUCLEAR_PATHWAY	0.00291545	0.0271266	0.431374	1.84592	0	63
MODULE_1	0.00392157	0.0274881	0.364731	1.84589	0	186
GSE22601_DOUBLE_POSITIVE_VS_CD8_SINGLE_POSITIVE_THYMOCYTE_UP	0.00367647	0.0271266	0.371427	1.84522	0	156
GO_MESODERM_DEVELOPMENT	0.00280899	0.0271266	0.438329	1.84511	0	55
GSE34156_UNTREATED_VS_24H_TLR1_TLR2_LIGAND_TREATED_MONOCYTE_UP	0.00303951	0.0271266	0.409644	1.84495	0	79
GSE16450_CTRL_VS_IFNA_6H_STIM_MATURE_NEURON_CELL_LINE_UP	0.00334448	0.0271266	0.402467	1.84491	0	92
RAF_UP.V1_DN	0.00325733	0.0271266	0.377893	1.8442	0	118
REACTOME_TRANSMISSION_ACROSS_CHEMICAL_SYNAPSES	0.00303951	0.0271266	0.416385	1.84413	0	73
SIG_IL4RECEPTOR_IN_B_LYPHOCYTES	0.0074813	0.0387847	0.535597	1.8438	2	26
ATM_DN.V1_UP	0.00283286	0.0271266	0.447806	1.8436	0	52
GO_STEROID_HORMONE_MEDIATED_SIGNALING_PATHWAY	0.00307692	0.0271266	0.410014	1.84263	0	78
WANG_METHYLATED_IN_BREAST_CANCER	0.00728155	0.0382698	0.555496	1.84209	2	22
GO_CELL_JUNCTION_ASSEMBLY	0.00289017	0.0271266	0.42661	1.84161	0	65
GO_ACTIN_FILAMENT	0.00280112	0.0271266	0.465648	1.84104	0	44
GO_KERATAN_SULFATE_METABOLIC_PROCESS	0.00719424	0.0381132	0.566926	1.84094	2	20
GSE40666_WT_VS_STAT1_KO_CD8_TCELL_UP	0.00361011	0.0271266	0.371262	1.84092	0	143
KIM_WT1_TARGETS_8HR_UP	0.00327869	0.0271266	0.382167	1.83881	0	111
AGCACTT,MIR-93,MIR-302A,MIR-302B,MIR-302C,MIR-302D,MIR-372,MIR-373,MIR-520E,MIR-520A,MIR-526B,MIR-520B,MIR-520C,MIR-520D	0.00436681	0.0294633	0.352529	1.83779	0	234
GSE24210_IL35_TREATED_VS_UNTREATED_TCONV_CD4_TCELL_DN	0.00328947	0.0271266	0.377173	1.83752	0	120
GSE14699_NAIVE_VS_DELETIONAL_TOLERANCE_CD8_TCELL_UP	0.00321543	0.0271266	0.3852	1.83741	0	106
GSE32986_UNSTIM_VS_GMCSF_AND_CURDLAN_LOWDOSE_STIM_DC_DN	0.00361011	0.0271266	0.365947	1.83702	0	165
PID_ERBB4_PATHWAY	0.00765306	0.0393843	0.526511	1.83696	2	28
GSE10240_IL22_VS_IL22_AND_IL17_STIM_PRIMARY_BRONCHIAL_EPITHELIAL_CELLS_DN	0.0035461	0.0271266	0.37395	1.83641	0	137
PID_VEGFR1_PATHWAY	0.00737101	0.038407	0.564614	1.83598	2	21
MORF_CASP2	0.00289017	0.0271266	0.425249	1.83573	0	65
REACTOME_SYNTHESIS_OF_PIPS_AT_THE_GOLGI_MEMBRANE	0.00487805	0.0312242	0.621467	1.83561	1	15
GO_HISTONE_DEMETHYLASE_ACTIVITY	0.00742574	0.0386168	0.550526	1.83529	2	23
GO_CELLULAR_RESPONSE_TO_HORMONE_STIMULUS	0.0044843	0.029834	0.336946	1.83451	0	322
REACTOME_CIRCADIAN_REPRESSION_OF_EXPRESSION_BY_REV_ERBA	0.00487805	0.0312242	0.620858	1.83381	1	15
GO_ENDOTHELIAL_CELL_MIGRATION	0.00493827	0.0312368	0.507461	1.83351	1	30
GSE22935_WT_VS_MYD88_KO_MACROPHAGE_12H_MBOVIS_BCG_STIM_UP	0.00328947	0.0271266	0.374995	1.83284	0	122
GSE10325_LUPUS_BCELL_VS_LUPUS_MYELOID_DN	0.00323625	0.0271266	0.377158	1.83249	0	116
GSE17974_CTRL_VS_ACT_IL4_AND_ANTI_IL12_48H_CD4_TCELL_UP	0.00328947	0.0271266	0.376127	1.83243	0	120
GSE35825_UNTREATED_VS_IFNG_STIM_MACROPHAGE_DN	0.00358423	0.0271266	0.367157	1.83232	0	157
GSE21927_SPLEEN_VS_TUMOR_MONOCYTE_BALBC_DN	0.0035461	0.0271266	0.373109	1.83228	0	137
GSE26669_CTRL_VS_COSTIM_BLOCK_MLR_CD8_TCELL_DN	0.00355872	0.0271266	0.369287	1.83191	0	147
MONNIER_POSTRADIATION_TUMOR_ESCAPE_UP	0.00462963	0.030421	0.338713	1.83179	0	316
V$FOXO1_02	0.00367647	0.0271266	0.372457	1.83152	0	141
KEGG_COLORECTAL_CANCER	0.00283286	0.0271266	0.444785	1.83116	0	52
GO_ADHERENS_JUNCTION_ORGANIZATION	0.00511509	0.0316418	0.502813	1.83072	1	32
VALK_AML_CLUSTER_4	0.00719424	0.0381132	0.563602	1.83015	2	20
GO_T_CELL_DIFFERENTIATION	0.00308642	0.0271266	0.401965	1.83004	0	81
V$SMAD3_Q6	0.00314465	0.0271266	0.388752	1.82984	0	100
GSE17974_IL4_AND_ANTI_IL12_VS_UNTREATED_2H_ACT_CD4_TCELL_DN	0.0031348	0.0271266	0.402677	1.82982	0	82
GSE7348_UNSTIM_VS_LPS_STIM_MACROPHAGE_UP	0.00330033	0.0271266	0.373547	1.82945	0	123
GSE360_DC_VS_MAC_T_GONDII_DN	0.00340136	0.0271266	0.380632	1.8288	0	113
GO_GOLGI_TO_ENDOSOME_TRANSPORT	0.00733496	0.038369	0.59547	1.82864	2	17
MANALO_HYPOXIA_UP	0.00328947	0.0271266	0.374915	1.82839	0	119
AGGAAGC,MIR-516-3P	0.00307692	0.0271266	0.407417	1.82838	0	77
GSE14350_TREG_VS_TEFF_UP	0.0035461	0.0271266	0.362635	1.82713	0	166
PID_IL6_7_PATHWAY	0.00275482	0.0271266	0.482778	1.82697	0	37
GSE24142_ADULT_VS_FETAL_EARLY_THYMIC_PROGENITOR_UP	0.00352113	0.0271266	0.372991	1.82552	0	133
GO_OLFACTORY_LOBE_DEVELOPMENT	0.00733496	0.038369	0.594259	1.82492	2	17
GSE19401_PLN_VS_PEYERS_PATCH_FOLLICULAR_DC_UP	0.00347222	0.0271266	0.371638	1.8248	0	132
PID_IL2_STAT5_PATHWAY	0.00737101	0.038407	0.561145	1.8247	2	21
GO_ALPHA_BETA_T_CELL_DIFFERENTIATION	0.00757576	0.0390921	0.541186	1.82452	2	25
GACAGGG,MIR-339	0.0027248	0.0271266	0.455296	1.82324	0	45
GSE13485_DAY1_VS_DAY21_YF17D_VACCINE_PBMC_UP	0.00357143	0.0271266	0.367361	1.82294	0	144
AAGGGAT,MIR-188	0.0028169	0.0271266	0.429414	1.82263	0	59
CAGTGTT,MIR-141,MIR-200A	0.0041841	0.0287245	0.351008	1.82188	0	217
AGGAGTG,MIR-483	0.00280899	0.0271266	0.45067	1.82158	0	48
RICKMAN_TUMOR_DIFFERENTIATED_WELL_VS_POORLY_UP	0.00390625	0.0274818	0.357927	1.82156	0	188
BIOCARTA_ARAP_PATHWAY	0.0097561	0.0460497	0.616595	1.82122	3	15
GGCACTT,MIR-519E	0.0033557	0.0271266	0.397992	1.82114	0	91
GO_SITE_OF_POLARIZED_GROWTH	0.00334448	0.0271266	0.396033	1.8205	0	93
GO_CELLULAR_RESPONSE_TO_ALCOHOL	0.00291545	0.0271266	0.42543	1.82048	0	63
GSE13522_CTRL_VS_T_CRUZI_Y_STRAIN_INF_SKIN_129_MOUSE_DN	0.00324675	0.0271266	0.378403	1.82006	0	110
GO_HEART_MORPHOGENESIS	0.00328947	0.0271266	0.391751	1.81988	0	97
GSE24634_IL4_VS_CTRL_TREATED_NAIVE_CD4_TCELL_DAY3_UP	0.00325733	0.0271266	0.372862	1.81965	0	118
HUMMERICH_SKIN_CANCER_PROGRESSION_UP	0.00282486	0.0271266	0.444415	1.81925	0	51
GO_BONE_MORPHOGENESIS	0.00522193	0.0317916	0.497096	1.8189	1	33
WOOD_EBV_EBNA1_TARGETS_UP	0.00324675	0.0271266	0.398225	1.81837	0	87
GSE17974_0.5H_VS_72H_IL4_AND_ANTI_IL12_ACT_CD4_TCELL_UP	0.0035461	0.0271266	0.360885	1.81832	0	166
GCM_PTK2	0.00328947	0.0271266	0.373119	1.81778	0	120
GSE3982_EFF_MEMORY_CD4_TCELL_VS_TH1_UP	0.00323625	0.0271266	0.374108	1.81767	0	116
GO_MAMMARY_GLAND_MORPHOGENESIS	0.00722892	0.0381132	0.580931	1.81631	2	18
GO_CARBOHYDRATE_HOMEOSTASIS	0.003367	0.0271266	0.397625	1.81618	0	89
GO_GLUCOSE_HOMEOSTASIS	0.003367	0.0271266	0.397625	1.81618	0	89
GO_SYNAPSE	0.00462963	0.030421	0.333601	1.81588	0	328
GSE5542_UNTREATED_VS_IFNA_AND_IFNG_TREATED_EPITHELIAL_CELLS_6H_DN	0.00367647	0.0271266	0.369226	1.81563	0	141
GO_PALATE_DEVELOPMENT	0.00271739	0.0271266	0.458919	1.81531	0	43
REACTOME_CHONDROITIN_SULFATE_DERMATAN_SULFATE_METABOLISM	0.00728155	0.0382698	0.547276	1.81483	2	22
KEGG_VEGF_SIGNALING_PATHWAY	0.00275482	0.0271266	0.442341	1.81472	0	50
REACTOME_SIGNALING_BY_NOTCH	0.00307692	0.0271266	0.403792	1.81466	0	78
HALLMARK_CHOLESTEROL_HOMEOSTASIS	0.00280899	0.0271266	0.431009	1.8143	0	55
TATTATA,MIR-374	0.003861	0.027293	0.356646	1.81429	0	194
GSE11961_MARGINAL_ZONE_BCELL_VS_MEMORY_BCELL_DAY40_UP	0.00330033	0.0271266	0.370442	1.81424	0	123
GSE15330_HSC_VS_MEGAKARYOCYTE_ERYTHROID_PROGENITOR_UP	0.00325733	0.0271266	0.371727	1.8141	0	118
GO_AMMONIUM_ION_BINDING	0.00486618	0.0312242	0.600641	1.81393	1	16
GO_PROTEOGLYCAN_BIOSYNTHETIC_PROCESS	0.00515464	0.0316418	0.503914	1.81393	1	31
GSE19888_CTRL_VS_A3R_INHIBITOR_TREATED_MAST_CELL_DN	0.00359712	0.0271266	0.366256	1.81325	0	151
GSE11057_CD4_CENT_MEM_VS_PBMC_UP	0.00358423	0.0271266	0.363317	1.81316	0	157
PID_PS1_PATHWAY	0.00275482	0.0271266	0.479002	1.81268	0	37
GSE22886_NAIVE_CD8_TCELL_VS_NKCELL_DN	0.00355872	0.0271266	0.365401	1.81263	0	147
GO_MAMMARY_GLAND_DEVELOPMENT	0.00291545	0.0271266	0.423567	1.81251	0	63
MODULE_12	0.00359712	0.0271266	0.366073	1.81234	0	151
V$LMO2COM_01	0.00347222	0.0271266	0.369034	1.81202	0	132
GO_REGULATION_OF_STEROID_METABOLIC_PROCESS	0.00273224	0.0271266	0.481167	1.81195	0	36
IVANOVA_HEMATOPOIESIS_STEM_CELL_AND_PROGENITOR	0.00510204	0.0316393	0.324357	1.81192	0	412
GO_REGULATION_OF_CELL_PROJECTION_ORGANIZATION	0.0045045	0.029834	0.334426	1.81175	0	312
GO_ACYLGLYCEROL_BIOSYNTHETIC_PROCESS	0.00733496	0.038369	0.589906	1.81156	2	17
GO_NEUTRAL_LIPID_BIOSYNTHETIC_PROCESS	0.00733496	0.038369	0.589906	1.81156	2	17
PID_INSULIN_PATHWAY	0.00278552	0.0271266	0.474282	1.81142	0	39
GO_CELL_SUBSTRATE_JUNCTION_ASSEMBLY	0.0071599	0.0380835	0.569489	1.81064	2	19
GSE6269_E_COLI_VS_STAPH_AUREUS_INF_PBMC_DN	0.00324675	0.0271266	0.371113	1.81056	0	117
CAGGGTC,MIR-504	0.00280899	0.0271266	0.430076	1.81037	0	55
GO_CALMODULIN_BINDING	0.00328947	0.0271266	0.390206	1.8103	0	96
GSE3920_UNTREATED_VS_IFNG_TREATED_ENDOTHELIAL_CELL_DN	0.00361011	0.0271266	0.360674	1.81028	0	163
GOZGIT_ESR1_TARGETS_DN	0.00518135	0.0316601	0.330679	1.80971	0	365
GTCTTCC,MIR-7	0.00330033	0.0271266	0.37394	1.80968	0	114
V$PAX4_04	0.00328947	0.0271266	0.370249	1.80964	0	122
GO_ORGANIC_HYDROXY_COMPOUND_TRANSPORT	0.00283286	0.0271266	0.422859	1.80901	0	62
GO_LYMPHOCYTE_DIFFERENTIATION	0.0035461	0.0271266	0.371129	1.80787	0	129
GO_HEAD_MORPHOGENESIS	0.00722892	0.0381132	0.577963	1.80703	2	18
BURTON_ADIPOGENESIS_2	0.00280899	0.0271266	0.433744	1.80505	0	53
ACTGCAG,MIR-17-3P	0.00307692	0.0271266	0.402201	1.80497	0	77
GO_RESPIRATORY_SYSTEM_DEVELOPMENT	0.00319489	0.0271266	0.384281	1.80492	0	99
REACTOME_SYNTHESIS_OF_PIPS_AT_THE_PLASMA_MEMBRANE	0.00757576	0.0390921	0.535351	1.80485	2	25
BIOCARTA_CREB_PATHWAY	0.00746269	0.0387334	0.539426	1.80471	2	24
MODULE_175	0.00765306	0.0393843	0.517041	1.80392	2	28
GO_CELL_PROJECTION_MEMBRANE	0.00361011	0.0271266	0.363763	1.80374	0	143
GTATTAT,MIR-369-3P	0.00371747	0.0271266	0.365259	1.80337	0	142
BIOCARTA_TCR_PATHWAY	0.00277008	0.0271266	0.467676	1.80304	0	40
KEGG_ERBB_SIGNALING_PATHWAY	0.00291545	0.0271266	0.421345	1.8025	0	64
GSE21360_PRIMARY_VS_TERTIARY_MEMORY_CD8_TCELL_UP	0.00361011	0.0271266	0.358992	1.80211	0	165
GSE6269_FLU_VS_E_COLI_INF_PBMC_UP	0.00359712	0.0271266	0.369629	1.8021	0	134
GSE15624_3H_VS_6H_HALOFUGINONE_TREATED_CD4_TCELL_UP	0.00330033	0.0271266	0.367952	1.80204	0	123
GO_POSITIVE_REGULATION_OF_NERVOUS_SYSTEM_DEVELOPMENT	0.00413223	0.028604	0.348466	1.80187	0	212
MARIADASON_RESPONSE_TO_BUTYRATE_SULINDAC_6	0.00273973	0.0271266	0.461877	1.80172	0	41
GO_REGULATION_OF_DEVELOPMENTAL_GROWTH	0.00371747	0.0271266	0.364813	1.80117	0	142
GO_SINGLE_ORGANISM_BEHAVIOR	0.00361011	0.0271266	0.358779	1.80104	0	165
JOHNSTONE_PARVB_TARGETS_3_UP	0.00436681	0.0294633	0.333063	1.80054	0	306
DAZARD_RESPONSE_TO_UV_SCC_DN	0.00327869	0.0271266	0.377631	1.80005	0	107
BIOCARTA_PPARA_PATHWAY	0.00277008	0.0271266	0.466742	1.79944	0	40
PID_GMCSF_PATHWAY	0.00767263	0.039409	0.49405	1.79881	2	32
BEIER_GLIOMA_STEM_CELL_UP	0.00722892	0.0381132	0.575279	1.79864	2	18
SANSOM_WNT_PATHWAY_REQUIRE_MYC	0.00767263	0.039409	0.493695	1.79752	2	32
BIOCARTA_GPCR_PATHWAY	0.00493827	0.0312368	0.497426	1.79726	1	30
GSE37605_FOXP3_FUSION_GFP_VS_IRES_GFP_TREG_NOD_DN	0.00321543	0.0271266	0.376739	1.79706	0	106
GSE38304_MYC_NEG_VS_POS_GC_BCELL_UP	0.00371747	0.0271266	0.363949	1.79691	0	142
PID_VEGFR1_2_PATHWAY	0.00277778	0.0271266	0.424292	1.79671	0	57
GSE7852_TREG_VS_TCONV_DN	0.00359712	0.0271266	0.368511	1.79665	0	134
SENESE_HDAC3_TARGETS_UP	0.00497512	0.0312444	0.329766	1.79602	0	341
PID_RAS_PATHWAY	0.00737101	0.038407	0.552291	1.79591	2	21
GSE40274_CTRL_VS_FOXP3_TRANSDUCED_ACTIVATED_CD4_TCELL_DN	0.00358423	0.0271266	0.359701	1.79539	0	155
GSE21927_SPLEEN_VS_BONE_MARROW_MONOCYTE_BALBC_UP	0.00342466	0.0271266	0.367155	1.79537	0	126
GSE17974_1.5H_VS_72H_IL4_AND_ANTI_IL12_ACT_CD4_TCELL_UP	0.0037037	0.0271266	0.359987	1.79509	0	160
GO_REGULATION_OF_POLYSACCHARIDE_METABOLIC_PROCESS	0.00757576	0.0390921	0.532342	1.7947	2	25
ZWANG_CLASS_3_TRANSIENTLY_INDUCED_BY_EGF	0.0035461	0.0271266	0.367798	1.79464	0	130
GSE22886_NAIVE_CD4_TCELL_VS_48H_ACT_TH1_UP	0.00362319	0.0271266	0.358752	1.7943	0	161
MODULE_2	0.00392157	0.0274881	0.354516	1.79419	0	186
chr16p13	0.00361011	0.0271266	0.361664	1.79333	0	143
GSE7852_TREG_VS_TCONV_LN_DN	0.00321543	0.0271266	0.375856	1.79285	0	106
GO_CELL_CELL_ADHESION_VIA_PLASMA_MEMBRANE_ADHESION_MOLECULES	0.00280899	0.0271266	0.425907	1.79282	0	55
SCHAEFFER_PROSTATE_DEVELOPMENT_48HR_DN	0.004	0.027979	0.352024	1.79277	0	197
MORF_JAG1	0.00280112	0.0271266	0.442846	1.79274	0	47
GO_UROGENITAL_SYSTEM_DEVELOPMENT	0.00355872	0.0271266	0.366488	1.79198	0	135
GO_POSITIVE_REGULATION_OF_SMALL_GTPASE_MEDIATED_SIGNAL_TRANSDUCTION	0.00733496	0.038369	0.583226	1.79104	2	17
GCM_DFFA	0.00325733	0.0271266	0.366996	1.79102	0	118
MODULE_38	0.00414938	0.0286287	0.344966	1.7904	0	219
GO_REGULATION_OF_DENDRITE_DEVELOPMENT	0.00292398	0.0271266	0.404532	1.79023	0	71
CHEN_HOXA5_TARGETS_9HR_DN	0.00493827	0.0312368	0.495366	1.78981	1	30
CTCAAGA,MIR-526B	0.0027248	0.0271266	0.446933	1.78975	0	45
GO_REGULATION_OF_EMBRYONIC_DEVELOPMENT	0.0028169	0.0271266	0.421613	1.78953	0	59
ZHU_CMV_24_HR_DN	0.0027248	0.0271266	0.481806	1.78916	0	35
REACTOME_NRAGE_SIGNALS_DEATH_THROUGH_JNK	0.00767263	0.039409	0.491393	1.78914	2	32
GO_UDP_GLYCOSYLTRANSFERASE_ACTIVITY	0.00287356	0.0271266	0.410481	1.7891	0	68
XU_CREBBP_TARGETS_DN	0.00515464	0.0316418	0.497004	1.78905	1	31
GO_TERMINAL_BOUTON	0.00757576	0.0390921	0.53045	1.78832	2	25
GSE45365_WT_VS_IFNAR_KO_CD11B_DC_MCMV_INFECTION_UP	0.00359712	0.0271266	0.361221	1.78832	0	151
GO_RAS_GUANYL_NUCLEOTIDE_EXCHANGE_FACTOR_ACTIVITY	0.00324675	0.0271266	0.371736	1.78799	0	110
GO_REGULATION_OF_CELLULAR_COMPONENT_MOVEMENT	0.00518135	0.0316601	0.325732	1.78699	0	364
REACTOME_G_ALPHA_Z_SIGNALLING_EVENTS	0.00746269	0.0387334	0.534126	1.78698	2	24
V$ZIC3_01	0.00347222	0.0271266	0.363899	1.78681	0	132
BIOCARTA_BAD_PATHWAY	0.00719424	0.0381132	0.549955	1.78583	2	20
GO_DEVELOPMENTAL_GROWTH_INVOLVED_IN_MORPHOGENESIS	0.00282486	0.0271266	0.436022	1.7849	0	51
GO_MODULATION_OF_SYNAPTIC_TRANSMISSION	0.00325733	0.0271266	0.365638	1.78439	0	118
CTCNANGTGNY_UNKNOWN	0.00283286	0.0271266	0.433373	1.78418	0	52
HUANG_DASATINIB_RESISTANCE_DN	0.0027248	0.0271266	0.44546	1.78385	0	45
GO_CLATHRIN_COATED_ENDOCYTIC_VESICLE	0.00278552	0.0271266	0.466966	1.78348	0	39
DACOSTA_UV_RESPONSE_VIA_ERCC3_XPCS_DN	0.002849	0.0271266	0.410475	1.78321	0	67
MODULE_174	0.002849	0.0271266	0.426682	1.78284	0	54
chr19q13	0.00487805	0.0312242	0.31737	1.78272	0	413
V$RP58_01	0.00314465	0.0271266	0.388757	1.78243	0	85
GSE13493_DP_VS_CD4INTCD8POS_THYMOCYTE_UP	0.00361011	0.0271266	0.360055	1.78228	0	150
GO_TRANSCRIPTIONAL_REPRESSOR_ACTIVITY_RNA_POLYMERASE_II_CORE_PROMOTER_PROXIMAL_REGION_SEQUENCE_SPECIFIC_BINDING	0.00289855	0.0271266	0.412327	1.78218	0	66
GSE411_WT_VS_SOCS3_KO_MACROPHAGE_DN	0.00378788	0.027195	0.354819	1.78218	0	170
GO_RNA_STABILIZATION	0.00757576	0.0390921	0.528573	1.78199	2	25
WATANABE_COLON_CANCER_MSI_VS_MSS_DN	0.00275482	0.0271266	0.470834	1.78177	0	37
CCTGTGA,MIR-513	0.0030581	0.0271266	0.393242	1.7814	0	80
CAGCACT,MIR-512-3P	0.0033557	0.0271266	0.389283	1.78129	0	91
V$LXR_Q3	0.0027248	0.0271266	0.444786	1.78116	0	45
PID_RXR_VDR_PATHWAY	0.00722892	0.0381132	0.569673	1.78111	2	18
GO_COGNITION	0.00328947	0.0271266	0.365107	1.78056	0	119
GSE18893_TCONV_VS_TREG_24H_CULTURE_UP	0.00343643	0.0271266	0.363198	1.7803	0	131
GSE4984_LPS_VS_VEHICLE_CTRL_TREATED_DC_DN	0.00361011	0.0271266	0.359615	1.7801	0	150
PID_TCR_PATHWAY	0.00282486	0.0271266	0.434845	1.78008	0	51
GSE1432_CTRL_VS_IFNG_24H_MICROGLIA_UP	0.00361011	0.0271266	0.35874	1.77883	0	143
GO_BEHAVIOR	0.00408163	0.0283863	0.344541	1.77819	0	209
GSE36476_CTRL_VS_TSST_ACT_72H_MEMORY_CD4_TCELL_OLD_UP	0.00330033	0.0271266	0.367389	1.77797	0	114
GSE32986_GMCSF_VS_GMCSF_AND_CURDLAN_HIGHDOSE_STIM_DC_DN	0.00359712	0.0271266	0.364609	1.77763	0	134
GO_PLASMA_MEMBRANE_REGION	0.0049505	0.0312368	0.32302	1.77749	0	370
GO_COLUMNAR_CUBOIDAL_EPITHELIAL_CELL_DIFFERENTIATION	0.0056338	0.0329458	0.442735	1.77746	1	46
GSE11057_NAIVE_VS_MEMORY_CD4_TCELL_UP	0.00328947	0.0271266	0.363484	1.77657	0	122
GO_MESENCHYME_DEVELOPMENT	0.00285714	0.0271266	0.403873	1.77639	0	69
GSE22886_NAIVE_CD4_TCELL_VS_NKCELL_UP	0.00337838	0.0271266	0.363175	1.77631	0	124
KEGG_OLFACTORY_TRANSDUCTION	0.00733496	0.038369	0.578281	1.77586	2	17
GSE22601_IMMATURE_CD4_SINGLE_POSITIVE_VS_DOUBLE_POSITIVE_THYMOCYTE_DN	0.00358423	0.0271266	0.355558	1.77508	0	158
GO_CHONDROITIN_SULFATE_PROTEOGLYCAN_METABOLIC_PROCESS	0.00737101	0.038407	0.545876	1.77505	2	21
GO_NEURAL_TUBE_FORMATION	0.00285714	0.0271266	0.403404	1.77433	0	69
GSE41867_NAIVE_VS_DAY15_LCMV_EFFECTOR_CD8_TCELL_DN	0.00380228	0.027195	0.353676	1.77431	0	172
NAGASHIMA_EGF_SIGNALING_UP	0.00275482	0.0271266	0.468653	1.77351	0	37
GO_ADENYLATE_CYCLASE_MODULATING_G_PROTEIN_COUPLED_RECEPTOR_SIGNALING_PATHWAY	0.00273224	0.0271266	0.470904	1.7733	0	36
GO_RESPONSE_TO_OSMOTIC_STRESS	0.00280112	0.0271266	0.46688	1.77318	0	38
GSE9946_MATURE_STIMULATORY_VS_LISTERIA_INF_MATURE_DC_UP	0.00332226	0.0271266	0.382833	1.77293	0	95
GSE3982_DC_VS_NEUTROPHIL_LPS_STIM_DN	0.00321543	0.0271266	0.371596	1.77253	0	106
AAAGGGA,MIR-204,MIR-211	0.00367647	0.0271266	0.35439	1.77203	0	162
KEGG_LONG_TERM_DEPRESSION	0.00278552	0.0271266	0.463953	1.77197	0	39
TAGCTTT,MIR-9	0.00362319	0.0271266	0.354199	1.77153	0	161
GSE5589_IL6_KO_VS_IL10_KO_LPS_AND_IL10_STIM_MACROPHAGE_180MIN_UP	0.00357143	0.0271266	0.356954	1.77056	0	145
GO_EPITHELIUM_DEVELOPMENT	0.0052356	0.0318022	0.313665	1.77055	0	440
GO_POSITIVE_REGULATION_OF_CELL_DEVELOPMENT	0.00431034	0.0293795	0.33499	1.77037	0	253
GO_GLYCOPROTEIN_METABOLIC_PROCESS	0.00390625	0.0274818	0.343182	1.77012	0	205
LEE_TARGETS_OF_PTCH1_AND_SUFU_DN	0.00515464	0.0316418	0.491607	1.76962	1	31
GO_HEART_DEVELOPMENT	0.00446429	0.0297597	0.337653	1.76925	0	249
GO_LEARNING	0.00280899	0.0271266	0.420187	1.76874	0	55
V$AP2_Q3	0.00358423	0.0271266	0.354035	1.76819	0	154
KASLER_HDAC7_TARGETS_1_UP	0.0037037	0.0271266	0.354504	1.76775	0	160
E2F3_UP.V1_UP	0.00327869	0.0271266	0.367307	1.76731	0	111
GO_DEVELOPMENTAL_CELL_GROWTH	0.00278552	0.0271266	0.462721	1.76727	0	39
JIANG_TIP30_TARGETS_DN	0.00733496	0.038369	0.575457	1.76718	2	17
MOREAUX_MULTIPLE_MYELOMA_BY_TACI_UP	0.00380228	0.027195	0.352223	1.76702	0	172
KEGG_PANCREATIC_CANCER	0.0028169	0.0271266	0.419416	1.76699	0	56
REACTOME_IL_3_5_AND_GM_CSF_SIGNALING	0.00263158	0.0271266	0.480595	1.76693	0	34
GO_VENTRICULAR_SEPTUM_DEVELOPMENT	0.00515464	0.0316418	0.49078	1.76664	1	31
GO_POSITIVE_REGULATION_OF_LOCOMOTION	0.00384615	0.027293	0.348332	1.76658	0	184
PID_IL12_STAT4_PATHWAY	0.00733496	0.038369	0.57522	1.76646	2	17
CHANDRAN_METASTASIS_UP	0.003663	0.0271266	0.352867	1.76644	0	164
CRX_DN.V1_DN	0.0028169	0.0271266	0.416123	1.76622	0	59
BIOCARTA_INTEGRIN_PATHWAY	0.00493827	0.0312368	0.488779	1.76601	1	30
GSE22886_CD4_TCELL_VS_BCELL_NAIVE_UP	0.0037037	0.0271266	0.354145	1.76596	0	160
GCM_SMO	0.00271739	0.0271266	0.44642	1.76587	0	43
ZHAN_MULTIPLE_MYELOMA_MF_DN	0.00765306	0.0393843	0.506099	1.76574	2	28
GSE5142_HTERT_TRANSDUCED_VS_CTRL_CD8_TCELL_LATE_PASSAGE_CLONE_DN	0.00361011	0.0271266	0.35161	1.76479	0	163
GO_REGULATION_OF_CATENIN_IMPORT_INTO_NUCLEUS	0.0121951	0.0527809	0.597393	1.7645	4	15
QI_HYPOXIA	0.00323625	0.0271266	0.377973	1.76381	0	98
GSE3982_EOSINOPHIL_VS_BCELL_UP	0.00338983	0.0271266	0.382582	1.76253	0	94
GO_KINESIN_BINDING	0.0071599	0.0380835	0.554358	1.76253	2	19
GTTATAT,MIR-410	0.00278552	0.0271266	0.411641	1.76164	0	61
GSE29618_PDC_VS_MDC_UP	0.00358423	0.0271266	0.352856	1.76123	0	155
FLECHNER_BIOPSY_KIDNEY_TRANSPLANT_OK_VS_DONOR_DN	0.0071599	0.0380835	0.553942	1.76121	2	19
GSE27241_WT_VS_RORGT_KO_TH17_POLARIZED_CD4_TCELL_TREATED_WITH_DIGOXIN_DN	0.00330033	0.0271266	0.363923	1.7612	0	114
GO_NERVE_DEVELOPMENT	0.00737101	0.038407	0.541498	1.76081	2	21
V$SOX5_01	0.0037037	0.0271266	0.352943	1.75996	0	160
GO_CHONDROCYTE_DIFFERENTIATION	0.00765306	0.0393843	0.504348	1.75963	2	28
GO_ENDOCRINE_SYSTEM_DEVELOPMENT	0.002849	0.0271266	0.435166	1.75946	0	49
BEGUM_TARGETS_OF_PAX3_FOXO1_FUSION_UP	0.0102302	0.0471529	0.483009	1.75861	3	32
PID_KIT_PATHWAY	0.00271739	0.0271266	0.444548	1.75847	0	43
GO_AORTA_DEVELOPMENT	0.00757576	0.0390921	0.521505	1.75817	2	25
V$LEF1_Q6	0.00355872	0.0271266	0.359549	1.75805	0	135
SENESE_HDAC1_AND_HDAC2_TARGETS_UP	0.0035461	0.0271266	0.360277	1.75794	0	130
ELVIDGE_HIF1A_TARGETS_DN	0.0056338	0.0329458	0.41721	1.7577	1	56
GO_REGULATION_OF_MULTICELLULAR_ORGANISM_GROWTH	0.00280112	0.0271266	0.462645	1.75709	0	38
GO_CARDIAC_VENTRICLE_DEVELOPMENT	0.00560224	0.0329254	0.433682	1.75564	1	47
GSE14026_TH1_VS_TH17_UP	0.00319489	0.0271266	0.373707	1.75525	0	99
PASQUALUCCI_LYMPHOMA_BY_GC_STAGE_DN	0.00367647	0.0271266	0.356852	1.75478	0	141
BURTON_ADIPOGENESIS_PEAK_AT_2HR	0.00493827	0.0312368	0.485573	1.75443	1	30
GSE7219_UNSTIM_VS_LPS_AND_ANTI_CD40_STIM_NIK_NFKB2_KO_DC_UP	0.00347222	0.0271266	0.357265	1.75423	0	132
TCCCCAC,MIR-491	0.00554017	0.0329254	0.455	1.75417	1	40
KIM_WT1_TARGETS_12HR_UP	0.00328947	0.0271266	0.378069	1.754	0	96
GO_AXON	0.00409836	0.0284581	0.343854	1.75398	0	200
GSE29949_CD8_NEG_DC_SPLEEN_VS_MONOCYTE_BONE_MARROW_UP	0.00359712	0.0271266	0.354232	1.75372	0	151
GSE25087_FETAL_VS_ADULT_TREG_DN	0.00328947	0.0271266	0.35996	1.75366	0	120
GSE7348_LPS_VS_TOLERIZED_AND_LPS_STIM_MACROPHAGE_UP	0.00358423	0.0271266	0.351195	1.7533	0	158
HUTTMANN_B_CLL_POOR_SURVIVAL_UP	0.00392157	0.0274881	0.346858	1.75327	0	185
GO_POSITIVE_REGULATION_OF_AXON_EXTENSION	0.00970874	0.0459913	0.528654	1.75308	3	22
FOSTER_TOLERANT_MACROPHAGE_DN	0.00434783	0.0294633	0.327614	1.75305	0	281
GO_HINDBRAIN_DEVELOPMENT	0.00292398	0.0271266	0.396127	1.75303	0	71
GSE19941_IL10_KO_VS_IL10_KO_AND_NFKBP50_KO_LPS_AND_IL10_STIM_MACROPHAGE_UP	0.0035461	0.0271266	0.359827	1.75281	0	129
ACTACCT,MIR-196A,MIR-196B	0.003367	0.0271266	0.38374	1.75276	0	89
WINNEPENNINCKX_MELANOMA_METASTASIS_DN	0.00746269	0.0387334	0.523861	1.75263	2	24
WONG_ADULT_TISSUE_STEM_MODULE	0.00497512	0.0312444	0.316545	1.75262	0	388
MORF_FOSL1	0.00380228	0.027195	0.343257	1.75234	0	190
GO_HEAD_DEVELOPMENT	0.00483092	0.0311604	0.318029	1.75219	0	372
GO_POSITIVE_REGULATION_OF_TRANSCRIPTION_FACTOR_IMPORT_INTO_NUCLEUS	0.0078329	0.0400625	0.478847	1.75213	2	33
GSE21063_CTRL_VS_ANTI_IGM_STIM_BCELL_3H_UP	0.00327869	0.0271266	0.364048	1.75163	0	111
MODULE_123	0.00358423	0.0271266	0.350911	1.75124	0	157
GSE7460_TCONV_VS_TREG_LN_UP	0.00322581	0.0271266	0.364636	1.75112	0	109
CCACACA,MIR-147	0.00278552	0.0271266	0.458463	1.751	0	39
GO_CHONDROITIN_SULFATE_PROTEOGLYCAN_BIOSYNTHETIC_PROCESS	0.00486618	0.0312242	0.579684	1.75064	1	16
REACTOME_TRIGLYCERIDE_BIOSYNTHESIS	0.00515464	0.0316418	0.486292	1.75049	1	31
GGGCATT,MIR-365	0.00304878	0.0271266	0.392628	1.7502	0	76
BROWNE_HCMV_INFECTION_1HR_UP	0.00515464	0.0316418	0.485892	1.74905	1	31
GO_REGULATION_OF_P38MAPK_CASCADE	0.00486618	0.0312242	0.579071	1.74879	1	16
GSE30962_ACUTE_VS_CHRONIC_LCMV_SECONDARY_INF_CD8_TCELL_UP	0.00343643	0.0271266	0.356648	1.74819	0	131
RODRIGUES_NTN1_TARGETS_DN	0.00308642	0.0271266	0.383925	1.74791	0	81
DACOSTA_UV_RESPONSE_VIA_ERCC3_COMMON_DN	0.00497512	0.0312444	0.310925	1.74774	0	416
GO_CILIARY_MEMBRANE	0.0102302	0.0471529	0.479881	1.74722	3	32
GO_REGULATION_OF_PRI_MIRNA_TRANSCRIPTION_FROM_RNA_POLYMERASE_II_PROMOTER	0.0121951	0.0527809	0.591527	1.74718	4	15
GO_REGULATION_OF_CELL_MORPHOGENESIS	0.0045045	0.029834	0.322498	1.74713	0	312
GCACTTT,MIR-17-5P,MIR-20A,MIR-106A,MIR-106B,MIR-20B,MIR-519D	0.00502513	0.0314253	0.313238	1.74692	0	404
GSE10147_IL3_VS_IL3_AND_HIVP17_STIM_PDC_UP	0.00359712	0.0271266	0.356368	1.74685	0	138
GO_REGULATION_OF_VASCULATURE_DEVELOPMENT	0.00334448	0.0271266	0.379846	1.74609	0	93
GO_AMEBOIDAL_TYPE_CELL_MIGRATION	0.00303951	0.0271266	0.394213	1.74593	0	73
GSE13485_CTRL_VS_DAY1_YF17D_VACCINE_PBMC_DN	0.00515464	0.0316418	0.485023	1.74592	1	31
MORF_PDPK1	0.00560224	0.0329254	0.431078	1.7451	1	47
CTTGTAT,MIR-381	0.00357143	0.0271266	0.351628	1.74487	0	144
PID_S1P_S1P2_PATHWAY	0.00737101	0.038407	0.536512	1.7446	2	21
ACCAATC,MIR-509	0.00990099	0.0463401	0.523175	1.74411	3	23
ZHENG_FOXP3_TARGETS_IN_T_LYMPHOCYTE_DN	0.0125313	0.0536098	0.500351	1.74379	4	27
PID_MET_PATHWAY	0.00290698	0.0271266	0.395741	1.74337	0	70
GO_EMBRYONIC_CAMERA_TYPE_EYE_DEVELOPMENT	0.00977995	0.0461297	0.56754	1.74287	3	17
GSE15930_NAIVE_VS_48H_IN_VITRO_STIM_CD8_TCELL_UP	0.00328947	0.0271266	0.356529	1.74258	0	122
REACTOME_GPCR_DOWNSTREAM_SIGNALING	0.00357143	0.0271266	0.351141	1.74237	0	148
GO_PHOSPHATIDYLINOSITOL_3_KINASE_COMPLEX	0.00486618	0.0312242	0.576866	1.74213	1	16
GO_VASCULATURE_DEVELOPMENT	0.00420168	0.0288155	0.336214	1.7421	0	220
REACTOME_DAG_AND_IP3_SIGNALING	0.00954654	0.0457404	0.547636	1.74116	3	19
REACTOME_YAP1_AND_WWTR1_TAZ_STIMULATED_GENE_EXPRESSION	0.00486618	0.0312242	0.576444	1.74085	1	16
GO_GALACTOSYLTRANSFERASE_ACTIVITY	0.00959233	0.0459103	0.535937	1.74031	3	20
REACTOME_DEVELOPMENTAL_BIOLOGY	0.00408163	0.0283863	0.334472	1.73863	0	215
GO_REGULATION_OF_SMOOTHENED_SIGNALING_PATHWAY	0.00280112	0.0271266	0.457739	1.73846	0	38
ERB2_UP.V1_UP	0.00326797	0.0271266	0.368696	1.7382	0	102
V$LYF1_01	0.0035461	0.0271266	0.356791	1.73802	0	129
GO_ACETYLGALACTOSAMINYLTRANSFERASE_ACTIVITY	0.00486618	0.0312242	0.575438	1.73781	1	16
BEGUM_TARGETS_OF_PAX3_FOXO1_FUSION_DN	0.0121951	0.0527809	0.588322	1.73771	4	15
GSE25088_CTRL_VS_IL4_STIM_MACROPHAGE_UP	0.00324675	0.0271266	0.355638	1.73744	0	121
TCTGGAC,MIR-198	0.00278552	0.0271266	0.405616	1.73585	0	61
GSE16385_UNTREATED_VS_12H_IFNG_TNF_TREATED_MACROPHAGE_UP	0.00304878	0.0271266	0.389307	1.7354	0	76
GTTAAAG,MIR-302B	0.0056338	0.0329458	0.432181	1.73509	1	46
GSE13493_DP_VS_CD8POS_THYMOCYTE_UP	0.00355872	0.0271266	0.349768	1.73508	0	147
PID_S1P_META_PATHWAY	0.00486618	0.0312242	0.574475	1.73491	1	16
GAGCTGG,MIR-337	0.00327869	0.0271266	0.363931	1.73474	0	107
GSE3982_MEMORY_CD4_TCELL_VS_TH1_UP	0.00357143	0.0271266	0.349558	1.73387	0	145
REACTOME_PLATELET_HOMEOSTASIS	0.00268817	0.0271266	0.439142	1.73383	0	42
GO_EXTRINSIC_COMPONENT_OF_CYTOPLASMIC_SIDE_OF_PLASMA_MEMBRANE	0.00555556	0.0329254	0.409414	1.73371	1	57
GO_INOSITOL_LIPID_MEDIATED_SIGNALING	0.00555556	0.0329254	0.409329	1.73335	1	57
REACTOME_TRANSPORT_TO_THE_GOLGI_AND_SUBSEQUENT_MODIFICATION	0.0125313	0.0536098	0.497319	1.73322	4	27
GO_CIRCULATORY_SYSTEM_DEVELOPMENT	0.00515464	0.0316418	0.313688	1.73302	0	393
GO_CARDIOVASCULAR_SYSTEM_DEVELOPMENT	0.00515464	0.0316418	0.313688	1.73302	0	393
RIZ_ERYTHROID_DIFFERENTIATION_12HR	0.00982801	0.0462526	0.532904	1.73287	3	21
AGCATTA,MIR-155	0.00326797	0.0271266	0.367455	1.73235	0	102
GO_VENTRICULAR_SEPTUM_MORPHOGENESIS	0.0122249	0.0528928	0.564037	1.73212	4	17
MODULE_321	0.0031348	0.0271266	0.381119	1.73185	0	82
ELVIDGE_HYPOXIA_BY_DMOG_UP	0.00324675	0.0271266	0.37926	1.73177	0	87
GO_CENTRAL_NERVOUS_SYSTEM_DEVELOPMENT	0.00526316	0.0319405	0.306535	1.73136	0	443
GSE24634_NAIVE_CD4_TCELL_VS_DAY7_IL4_CONV_TREG_UP	0.00358423	0.0271266	0.346691	1.73081	0	158
TURASHVILI_BREAST_DUCTAL_CARCINOMA_VS_DUCTAL_NORMAL_DN	0.00278552	0.0271266	0.404288	1.73017	0	61
GSE34156_UNTREATED_VS_24H_NOD2_AND_TLR1_TLR2_LIGAND_TREATED_MONOCYTE_UP	0.00314465	0.0271266	0.377239	1.72962	0	85
GO_POSITIVE_REGULATION_OF_VASCULATURE_DEVELOPMENT	0.00283286	0.0271266	0.420064	1.72938	0	52
REACTOME_REGULATION_OF_WATER_BALANCE_BY_RENAL_AQUAPORINS	0.0123762	0.0533915	0.518728	1.72928	4	23
REACTOME_AQUAPORIN_MEDIATED_TRANSPORT	0.0123762	0.0533915	0.518728	1.72928	4	23
GSE17974_0H_VS_48H_IN_VITRO_ACT_CD4_TCELL_UP	0.00347222	0.0271266	0.35207	1.72872	0	132
GSE29618_BCELL_VS_PDC_DAY7_FLU_VACCINE_DN	0.00357143	0.0271266	0.348343	1.72857	0	144
ATF2_S_UP.V1_DN	0.00307692	0.0271266	0.385124	1.72833	0	77
GO_CYCLIC_NUCLEOTIDE_BINDING	0.00973236	0.0459913	0.572287	1.7283	3	16
GO_LEUKOCYTE_DIFFERENTIATION	0.00380228	0.027195	0.344476	1.72815	0	172
GO_DEMETHYLASE_ACTIVITY	0.00763359	0.0393448	0.486804	1.72807	2	29
V$CACBINDINGPROTEIN_Q6	0.00361011	0.0271266	0.348487	1.72799	0	143
HALLMARK_APICAL_JUNCTION	0.00334448	0.0271266	0.375905	1.72798	0	93
GSE22033_UNTREATED_VS_ROSIGLITAZONE_TREATED_MEF_DN	0.00342466	0.0271266	0.353367	1.72795	0	126
V$POU6F1_01	0.00321543	0.0271266	0.362188	1.72765	0	106
RAO_BOUND_BY_SALL4	0.00357143	0.0271266	0.348819	1.72759	0	149
GSE43863_DAY6_EFF_VS_DAY150_MEM_TFH_CD4_TCELL_DN	0.0030581	0.0271266	0.381291	1.72727	0	80
GSE37605_TREG_VS_TCONV_NOD_FOXP3_FUSION_GFP_UP	0.0030303	0.0271266	0.387924	1.72662	0	74
PID_IL8_CXCR2_PATHWAY	0.00757576	0.0390921	0.512063	1.72633	2	25
GGGGCCC,MIR-296	0.00547945	0.0328201	0.442519	1.72621	1	41
GSE4590_LARGE_PRE_BCELL_VS_VPREB_POS_LARGE_PRE_BCELL_DN	0.00357143	0.0271266	0.347823	1.72599	0	144
GO_STEROL_BINDING	0.00757576	0.0390921	0.511957	1.72598	2	25
GO_REGULATION_OF_BIOMINERAL_TISSUE_DEVELOPMENT	0.00740741	0.0385515	0.477695	1.72597	2	30
GO_RECEPTOR_MEDIATED_ENDOCYTOSIS	0.00328947	0.0271266	0.371987	1.72578	0	96
PID_TCR_CALCIUM_PATHWAY	0.00973236	0.0459913	0.571249	1.72517	3	16
SWEET_LUNG_CANCER_KRAS_DN	0.00384615	0.027293	0.338842	1.72491	0	195
SCHAEFFER_SOX9_TARGETS_IN_PROSTATE_DEVELOPMENT_DN	0.00773196	0.0396679	0.479157	1.72481	2	31
GSE17721_PAM3CSK4_VS_CPG_0.5H_BMDC_UP	0.00357143	0.0271266	0.347575	1.72467	0	148
NOTCH_DN.V1_UP	0.00285714	0.0271266	0.392065	1.72445	0	69
GSE16450_CTRL_VS_IFNA_12H_STIM_IMMATURE_NEURON_CELL_LINE_UP	0.00367647	0.0271266	0.344821	1.72418	0	162
BIOCARTA_MCALPAIN_PATHWAY	0.00973236	0.0459913	0.570875	1.72403	3	16
TERAO_AOX4_TARGETS_HG_UP	0.00995025	0.0464728	0.515236	1.72378	3	24
GO_NEGATIVE_REGULATION_OF_NERVOUS_SYSTEM_DEVELOPMENT	0.00330033	0.0271266	0.351959	1.72372	0	123
VALK_AML_CLUSTER_11	0.00982801	0.0462526	0.53007	1.72365	3	21
TAKEDA_TARGETS_OF_NUP98_HOXA9_FUSION_16D_UP	0.0030303	0.0271266	0.387205	1.72342	0	74
GO_GROWTH_FACTOR_BINDING	0.0056338	0.0329458	0.429159	1.72295	1	46
GSE10325_LUPUS_CD4_TCELL_VS_LUPUS_BCELL_UP	0.00324675	0.0271266	0.352668	1.72293	0	121
GSE3982_MEMORY_CD4_TCELL_VS_TH2_UP	0.00369004	0.0271266	0.351754	1.72284	0	139
V$E47_02	0.00346021	0.0271266	0.352276	1.72278	0	127
SIG_BCR_SIGNALING_PATHWAY	0.00271739	0.0271266	0.435372	1.72217	0	43
REACTOME_RORA_ACTIVATES_CIRCADIAN_EXPRESSION	0.0146699	0.0578395	0.560769	1.72208	5	17
GSE11057_NAIVE_VS_EFF_MEMORY_CD4_TCELL_UP	0.00359712	0.0271266	0.351305	1.72203	0	138
GO_NEGATIVE_REGULATION_OF_SMOOTHENED_SIGNALING_PATHWAY	0.0146699	0.0578395	0.560726	1.72195	5	17
MORF_RUNX1	0.00314465	0.0271266	0.375538	1.72183	0	85
GO_BIOLOGICAL_ADHESION	0.00510204	0.0316393	0.308194	1.72163	0	412
GSE7460_CTRL_VS_TGFB_TREATED_ACT_CD8_TCELL_DN	0.00324675	0.0271266	0.352373	1.72149	0	121
WIEDERSCHAIN_TARGETS_OF_BMI1_AND_PCGF2	0.0125313	0.0536098	0.493846	1.72112	4	27
PHONG_TNF_RESPONSE_VIA_P38_PARTIAL	0.00321543	0.0271266	0.360805	1.72105	0	106
GO_ANTERIOR_POSTERIOR_PATTERN_SPECIFICATION	0.00324675	0.0271266	0.376832	1.72068	0	87
GO_NEURON_DIFFERENTIATION	0.0049505	0.0312368	0.306218	1.72068	0	415
GO_UDP_GALACTOSYLTRANSFERASE_ACTIVITY	0.00973236	0.0459913	0.569675	1.72041	3	16
GSE37605_NOD_VS_C57BL6_IRES_GFP_TREG_UP	0.00324675	0.0271266	0.37676	1.72036	0	87
GCM_ZNF198	0.00324675	0.0271266	0.357652	1.72024	0	110
GSE3039_CD4_TCELL_VS_ALPHAALPHA_CD8_TCELL_UP	0.00367647	0.0271266	0.351216	1.72024	0	140
GSE7460_WT_VS_FOXP3_HET_ACT_TCONV_UP	0.00367647	0.0271266	0.3511	1.71967	0	140
GO_CELLULAR_RESPONSE_TO_LIPID	0.00446429	0.0297597	0.329638	1.71957	0	242
AAGCACT,MIR-520F	0.00361011	0.0271266	0.342579	1.71947	0	163
GCM_CSNK1D	0.0102041	0.0470651	0.49283	1.71945	3	28
GSE6259_BCELL_VS_CD4_TCELL_UP	0.00343643	0.0271266	0.350625	1.71866	0	131
NAGASHIMA_NRG1_SIGNALING_UP	0.00328947	0.0271266	0.352368	1.71843	0	119
REACTOME_NEURONAL_SYSTEM	0.00323625	0.0271266	0.368242	1.7184	0	98
GSE21063_CTRL_VS_ANTI_IGM_STIM_BCELL_NFATC1_KO_3H_DN	0.00361011	0.0271266	0.346519	1.71823	0	143
GO_G_PROTEIN_COUPLED_RECEPTOR_SIGNALING_PATHWAY_COUPLED_TO_CYCLIC_NUCLEOTIDE_SECOND_MESSENGER	0.00280112	0.0271266	0.452405	1.7182	0	38
VERHAAK_AML_WITH_NPM1_MUTATED_DN	0.0035461	0.0271266	0.352099	1.71804	0	130
GO_RESPONSE_TO_COLD	0.0121359	0.0526442	0.518035	1.71787	4	22
PID_P38_MKK3_6PATHWAY	0.0124378	0.0534497	0.513463	1.71784	4	24
PID_AR_NONGENOMIC_PATHWAY	0.010101	0.0467351	0.509534	1.71781	3	25
GO_ACTIVATION_OF_GTPASE_ACTIVITY	0.00561798	0.0329254	0.408053	1.71767	1	55
GSE43863_LY6C_INT_CXCR5POS_VS_LY6C_LOW_CXCR5NEG_EFFECTOR_CD4_TCELL_UP	0.00355872	0.0271266	0.351254	1.71749	0	135
GO_REGULATION_OF_GLYCOGEN_METABOLIC_PROCESS	0.00982801	0.0462526	0.528164	1.71745	3	21
GSE20198_IL12_VS_IL12_IL18_TREATED_ACT_CD4_TCELL_DN	0.00378788	0.027195	0.341888	1.71723	0	170
TACGGGT,MIR-99A,MIR-100,MIR-99B	0.0146699	0.0578395	0.559169	1.71717	5	17
CTGCAGY_UNKNOWN	0.00512821	0.0316418	0.308184	1.71712	0	409
GSE14308_TH17_VS_NATURAL_TREG_DN	0.00367647	0.0271266	0.350479	1.71663	0	140
GO_FILOPODIUM	0.00284091	0.0271266	0.403364	1.71584	0	60
HOEBEKE_LYMPHOID_STEM_CELL_UP	0.00297619	0.0271266	0.386951	1.71574	0	72
HOFFMANN_PRE_BI_TO_LARGE_PRE_BII_LYMPHOCYTE_DN	0.00544959	0.0327589	0.428412	1.71559	1	45
GO_MUSCLE_ORGAN_MORPHOGENESIS	0.0124688	0.0534796	0.4983	1.7154	4	26
GSE7764_IL15_NK_CELL_24H_VS_SPLENOCYTE_DN	0.00358423	0.0271266	0.343691	1.71521	0	157
GO_CARDIAC_CHAMBER_MORPHOGENESIS	0.00278552	0.0271266	0.449018	1.71493	0	39
GSE23505_IL6_IL1_VS_IL6_IL1_IL23_TREATED_CD4_TCELL_DN	0.00367647	0.0271266	0.342864	1.7144	0	162
GSE32255_WT_VS_JMJD2D_KNOCKDOWN_4H_LPS_STIM_DC_UP	0.00334448	0.0271266	0.372928	1.71429	0	93
REACTOME_IL_2_SIGNALING	0.0078329	0.0400625	0.468464	1.71413	2	33
GSE41176_WT_VS_TAK1_KO_ANTI_IGM_STIM_BCELL_24H_UP	0.0037594	0.027195	0.339625	1.7141	0	175
CHEBOTAEV_GR_TARGETS_DN	0.00280112	0.0271266	0.433368	1.71341	0	44
GO_CARDIAC_CHAMBER_DEVELOPMENT	0.00291545	0.0271266	0.4005	1.71332	0	64
TACTTGA,MIR-26A,MIR-26B	0.00420168	0.0288155	0.331063	1.71312	0	216
GESERICK_TERT_TARGETS_DN	0.0195122	0.0699095	0.579947	1.71298	7	15
REACTOME_NUCLEAR_RECEPTOR_TRANSCRIPTION_PATHWAY	0.0149254	0.0582133	0.511821	1.71235	5	24
GSE19888_ADENOSINE_A3R_ACT_VS_TCELL_MEMBRANES_ACT_AND_A3R_INH_PRETREAT_IN_MAST_CELL_DN	0.00324675	0.0271266	0.350956	1.71222	0	117
HAN_JNK_SINGALING_UP	0.0148515	0.0580648	0.513594	1.71217	5	23
GO_O_ACYLTRANSFERASE_ACTIVITY	0.00740741	0.0385515	0.473871	1.71215	2	30
GO_EXCITATORY_SYNAPSE	0.0033557	0.0271266	0.374113	1.71188	0	91
PRC2_EED_UP.V1_DN	0.00359712	0.0271266	0.351112	1.71183	0	134
GSE11057_PBMC_VS_MEM_CD4_TCELL_UP	0.00307692	0.0271266	0.37384	1.71152	0	84
V$E2A_Q2	0.00328947	0.0271266	0.351257	1.71127	0	120
GSE22886_NAIVE_TCELL_VS_NKCELL_DN	0.00359712	0.0271266	0.345623	1.7111	0	151
PID_BETA_CATENIN_DEG_PATHWAY	0.00973236	0.0459913	0.566584	1.71108	3	16
GGGATGC,MIR-324-5P	0.00275482	0.0271266	0.452075	1.71078	0	37
GO_REGULATION_OF_ALCOHOL_BIOSYNTHETIC_PROCESS	0.0143885	0.0574816	0.526563	1.70987	5	20
KEGG_CHEMOKINE_SIGNALING_PATHWAY	0.00324675	0.0271266	0.3593	1.70964	0	105
GSE29618_PRE_VS_DAY7_POST_LAIV_FLU_VACCINE_PDC_UP	0.00278552	0.0271266	0.399465	1.70953	0	61
TCCATTKW_UNKNOWN	0.00357143	0.0271266	0.344501	1.7095	0	144
DUTERTRE_ESTRADIOL_RESPONSE_6HR_DN	0.00561798	0.0329254	0.422884	1.70927	1	48
GSE44955_MCSF_VS_MCSF_AND_IL27_STIM_MACROPHAGE_DN	0.00361011	0.0271266	0.344702	1.70922	0	143
MEISSNER_NPC_HCP_WITH_H3K4ME3_AND_H3K27ME3	0.00561798	0.0329254	0.422833	1.70906	1	48
GSE5589_LPS_VS_LPS_AND_IL10_STIM_MACROPHAGE_45MIN_DN	0.0035461	0.0271266	0.350236	1.70895	0	130
RADMACHER_AML_PROGNOSIS	0.00268817	0.0271266	0.432831	1.70891	0	42
MIKKELSEN_MEF_HCP_WITH_H3K27ME3	0.00304878	0.0271266	0.383361	1.70889	0	76
GSE16385_UNTREATED_VS_12H_ROSIGLITAZONE_TREATED_MACROPHAGE_UP	0.00566572	0.0330455	0.415071	1.70883	1	52
GO_EXTRINSIC_COMPONENT_OF_PLASMA_MEMBRANE	0.00308642	0.0271266	0.37534	1.70883	0	81
DOUGLAS_BMI1_TARGETS_UP	0.00520833	0.0317668	0.31009	1.70825	0	382
GSE44649_WT_VS_MIR155_KO_NAIVE_CD8_TCELL_UP	0.00320513	0.0271266	0.362818	1.70766	0	101
BIOCARTA_AKT_PATHWAY	0.0143198	0.0574816	0.536791	1.70668	5	19
BIOCARTA_CXCR4_PATHWAY	0.0143198	0.0574816	0.53669	1.70636	5	19
V$P300_01	0.00357143	0.0271266	0.343882	1.70634	0	148
REACTOME_CIRCADIAN_CLOCK	0.00280112	0.0271266	0.449202	1.70603	0	38
TONKS_TARGETS_OF_RUNX1_RUNX1T1_FUSION_SUSTAINDED_IN_ERYTHROCYTE_UP	0.0151515	0.0588887	0.505615	1.7046	5	25
EPPERT_LSC_R	0.00544959	0.0327589	0.458993	1.70445	1	35
AATGTGA,MIR-23A,MIR-23B	0.00462963	0.030421	0.322667	1.70444	0	268
KEGG_TIGHT_JUNCTION	0.00289855	0.0271266	0.394317	1.70434	0	66
GO_RECEPTOR_COMPLEX	0.0035461	0.0271266	0.349252	1.70415	0	130
GO_CELLULAR_RESPONSE_TO_GLUCAGON_STIMULUS	0.0143885	0.0574816	0.524759	1.70402	5	20
KEGG_FOCAL_ADHESION	0.00323625	0.0271266	0.358057	1.70346	0	104
DURCHDEWALD_SKIN_CARCINOGENESIS_DN	0.00383142	0.0272718	0.336091	1.70327	0	182
GSE7460_WT_VS_FOXP3_HET_ACT_WITH_TGFB_TCONV_UP	0.0035461	0.0271266	0.346804	1.7031	0	137
GSE12845_IGD_POS_BLOOD_VS_PRE_GC_TONSIL_BCELL_UP	0.00361011	0.0271266	0.343452	1.70302	0	143
GO_NEURON_PROJECTION_DEVELOPMENT	0.00446429	0.0297597	0.32	1.7029	0	273
GO_RENAL_TUBULE_DEVELOPMENT	0.0125313	0.0536098	0.48848	1.70242	4	27
PID_CXCR4_PATHWAY	0.00307692	0.0271266	0.378673	1.70178	0	78
GO_POSITIVE_REGULATION_OF_EPITHELIAL_CELL_MIGRATION	0.00560224	0.0329254	0.42033	1.70159	1	47
GSE22229_RENAL_TRANSPLANT_VS_HEALTHY_PBMC_DN	0.00347222	0.0271266	0.346512	1.70143	0	132
V$NGFIC_01	0.00378788	0.027195	0.338661	1.70102	0	170
YGCANTGCR_UNKNOWN	0.00308642	0.0271266	0.373561	1.70073	0	81
GO_EMBRYONIC_PATTERN_SPECIFICATION	0.0127551	0.0542712	0.487217	1.69986	4	28
GGCAGCT,MIR-22	0.00367647	0.0271266	0.342114	1.6996	0	156
CAGTATT,MIR-200B,MIR-200C,MIR-429	0.00471698	0.0307709	0.312361	1.69934	0	330
GSE7852_LN_VS_THYMUS_TREG_UP	0.00355872	0.0271266	0.347509	1.69918	0	135
LIANG_HEMATOPOIESIS_STEM_CELL_NUMBER_SMALL_VS_HUGE_DN	0.0127551	0.0542712	0.486868	1.69865	4	28
GO_REGULATION_OF_GASTRULATION	0.0219512	0.0754164	0.575092	1.69863	8	15
RIGGI_EWING_SARCOMA_PROGENITOR_UP	0.00384615	0.027293	0.334861	1.69826	0	184
SENESE_HDAC2_TARGETS_DN	0.00561798	0.0329254	0.420051	1.69782	1	48
GO_STEROL_TRANSPORT	0.0174564	0.0650602	0.493036	1.69728	6	26
GTGTGAG,MIR-342	0.00271739	0.0271266	0.429064	1.69722	0	43
GSE21360_TERTIARY_VS_QUATERNARY_MEMORY_CD8_TCELL_UP	0.00322581	0.0271266	0.353409	1.69721	0	109
GSE5099_UNSTIM_VS_MCSF_TREATED_MONOCYTE_DAY7_DN	0.00352113	0.0271266	0.346724	1.69696	0	133
PID_NFAT_3PATHWAY	0.00561798	0.0329254	0.419741	1.69657	1	48
GSE6259_33D1_POS_VS_DEC205_POS_SPLENIC_DC_UP	0.0035461	0.0271266	0.347589	1.69603	0	130
GSE19888_ADENOSINE_A3R_ACT_VS_TCELL_MEMBRANES_ACT_IN_MAST_CELL_DN	0.00357143	0.0271266	0.341899	1.69588	0	145
GARGALOVIC_RESPONSE_TO_OXIDIZED_PHOSPHOLIPIDS_RED_DN	0.0168675	0.0633789	0.542087	1.69486	6	18
GO_ACYLGLYCEROL_O_ACYLTRANSFERASE_ACTIVITY	0.0168675	0.0633789	0.542008	1.69461	6	18
GO_REGULATION_OF_CELL_MATRIX_ADHESION	0.00560224	0.0329254	0.401981	1.69444	1	58
ZWANG_TRANSIENTLY_UP_BY_2ND_EGF_PULSE_ONLY	0.00568182	0.033096	0.299168	1.69417	0	467
GO_GLAND_DEVELOPMENT	0.00390625	0.0274818	0.32759	1.69398	0	206
GSE39916_B_CELL_SPLEEN_VS_PLASMA_CELL_BONE_MARROW_UP	0.00347222	0.0271266	0.344995	1.69398	0	132
ACCATTT,MIR-522	0.00342466	0.0271266	0.346371	1.69374	0	126
GSE37416_CTRL_VS_12H_F_TULARENSIS_LVS_NEUTROPHIL_UP	0.00378788	0.027195	0.337091	1.69313	0	170
GO_EMBRYO_DEVELOPMENT_ENDING_IN_BIRTH_OR_EGG_HATCHING	0.00454545	0.0299861	0.310779	1.69299	0	324
GSE23568_CTRL_VS_ID3_TRANSDUCED_CD8_TCELL_UP	0.00358423	0.0271266	0.33905	1.69231	0	155
ST_INTEGRIN_SIGNALING_PATHWAY	0.00555556	0.0329254	0.399487	1.69167	1	57
MARSON_FOXP3_TARGETS_DN	0.00537634	0.0324796	0.428359	1.69126	1	42
V$HNF3B_01	0.00328947	0.0271266	0.364527	1.69117	0	96
BILD_E2F3_ONCOGENIC_SIGNATURE	0.00378788	0.027195	0.337548	1.69093	0	169
KEGG_NEUROTROPHIN_SIGNALING_PATHWAY	0.00319489	0.0271266	0.359956	1.69066	0	99
V$STAT4_01	0.00343643	0.0271266	0.344784	1.69003	0	131
V$ETF_Q6	0.0031348	0.0271266	0.371907	1.69	0	82
MORF_CNTN1	0.00292398	0.0271266	0.381875	1.68996	0	71
GSE41978_KLRG1_HIGH_VS_LOW_EFFECTOR_CD8_TCELL_UP	0.00328947	0.0271266	0.364143	1.68939	0	96
GO_RAB_GTPASE_BINDING	0.003367	0.0271266	0.369344	1.68906	0	90
GSE7460_FOXP3_MUT_VS_WT_ACT_WITH_TGFB_TCONV_DN	0.00355872	0.0271266	0.340394	1.68858	0	147
GRADE_COLON_AND_RECTAL_CANCER_DN	0.00569801	0.033118	0.404125	1.68858	1	54
GSE8835_CD4_VS_CD8_TCELL_UP	0.00358423	0.0271266	0.338278	1.6882	0	157
BROWNE_HCMV_INFECTION_24HR_UP	0.00323625	0.0271266	0.355114	1.68706	0	103
V$LHX3_01	0.00314465	0.0271266	0.367913	1.68687	0	85
GO_ENDOCYTOSIS	0.00436681	0.0294633	0.316265	1.68668	0	277
GSE4984_UNTREATED_VS_VEHICLE_CTRL_TREATED_DC_UP	0.00330033	0.0271266	0.348472	1.68642	0	114
V$NFAT_Q6	0.00328947	0.0271266	0.345024	1.68635	0	122
GSE43863_DAY6_EFF_VS_DAY150_MEM_LY6C_INT_CXCR5POS_CD4_TCELL_UP	0.00369004	0.0271266	0.344259	1.68613	0	139
KEGG_PHOSPHATIDYLINOSITOL_SIGNALING_SYSTEM	0.00560224	0.0329254	0.399962	1.68593	1	58
GO_REGULATION_OF_DENDRITE_MORPHOGENESIS	0.00560224	0.0329254	0.426399	1.68586	1	44
GSE36476_CTRL_VS_TSST_ACT_16H_MEMORY_CD4_TCELL_OLD_UP	0.00371747	0.0271266	0.34144	1.68578	0	142
LEE_CALORIE_RESTRICTION_NEOCORTEX_UP	0.00561798	0.0329254	0.405068	1.68571	1	53
GSE37301_CD4_TCELL_VS_GRANULOCYTE_MONOCYTE_PROGENITOR_UP	0.00332226	0.0271266	0.363876	1.68513	0	95
V$CRX_Q4	0.00324675	0.0271266	0.344922	1.68508	0	121
GCCNNNWTAAR_UNKNOWN	0.00303951	0.0271266	0.37395	1.68419	0	79
GO_POSITIVE_REGULATION_OF_JUN_KINASE_ACTIVITY	0.00537634	0.0324796	0.4264	1.68352	1	42
AACTGGA,MIR-145	0.00361011	0.0271266	0.333749	1.68352	0	168
BIOCARTA_MET_PATHWAY	0.0148148	0.0579856	0.465937	1.68348	5	30
GSE22886_NAIVE_CD4_TCELL_VS_48H_ACT_TH2_UP	0.00359712	0.0271266	0.343441	1.68348	0	138
GSE27786_CD8_TCELL_VS_NKTCELL_DN	0.00371747	0.0271266	0.34093	1.68326	0	142
RUTELLA_RESPONSE_TO_HGF_VS_CSF2RB_AND_IL4_DN	0.003861	0.027293	0.332561	1.68324	0	183
TBK1.DN.48HRS_UP	0.00547945	0.0328201	0.43147	1.68311	1	41
GO_GUANYL_NUCLEOTIDE_EXCHANGE_FACTOR_ACTIVITY	0.00362319	0.0271266	0.336437	1.68269	0	161
GO_LAMELLIPODIUM_ASSEMBLY	0.0190931	0.0690946	0.529215	1.68259	7	19
GSE20727_H2O2_VS_ROS_INHIBITOR_TREATED_DC_UP	0.00355872	0.0271266	0.338968	1.68151	0	147
HADDAD_B_LYMPHOCYTE_PROGENITOR	0.00436681	0.0294633	0.321268	1.68131	0	240
GO_RECEPTOR_SIGNALING_PROTEIN_SERINE_THREONINE_KINASE_ACTIVITY	0.0057971	0.0334317	0.388957	1.68117	1	66
PID_ERBB2_ERBB3_PATHWAY	0.00550964	0.0328975	0.444245	1.68115	1	37
V$CEBPA_01	0.0035461	0.0271266	0.342323	1.6811	0	137
V$TCF1P_Q6	0.00358423	0.0271266	0.33676	1.68088	0	155
GO_PROTEIN_O_LINKED_GLYCOSYLATION	0.00550964	0.0328975	0.409703	1.68082	1	50
GSE24142_EARLY_THYMIC_PROGENITOR_VS_DN2_THYMOCYTE_ADULT_UP	0.00337838	0.0271266	0.343609	1.68061	0	124
AAACCAC,MIR-140	0.00292398	0.0271266	0.379723	1.68044	0	71
GO_CARDIAC_SEPTUM_DEVELOPMENT	0.00560224	0.0329254	0.424924	1.68003	1	44
GO_BHLH_TRANSCRIPTION_FACTOR_BINDING	0.0171149	0.064092	0.547043	1.67993	6	17
GSE22886_NAIVE_CD4_TCELL_VS_MONOCYTE_UP	0.00359712	0.0271266	0.342675	1.67973	0	138
GSE14350_IL2RB_KO_VS_WT_TEFF_UP	0.00357143	0.0271266	0.338568	1.67936	0	145
V$FREAC7_01	0.00334448	0.0271266	0.365324	1.67934	0	93
GSE360_DC_VS_MAC_B_MALAYI_HIGH_DOSE_UP	0.00361011	0.0271266	0.339221	1.67915	0	150
MIKKELSEN_NPC_HCP_WITH_H3K27ME3	0.0056338	0.0329458	0.398538	1.67903	1	56
RIGGINS_TAMOXIFEN_RESISTANCE_UP	0.0127551	0.0542712	0.481244	1.67903	4	28
GO_GOLGI_TO_VACUOLE_TRANSPORT	0.0149254	0.0582133	0.501857	1.67901	5	24
PID_ENDOTHELIN_PATHWAY	0.00278552	0.0271266	0.439604	1.67898	0	39
GSE40277_GATA1_AND_SATB1_TRANSDUCED_VS_CTRL_CD4_TCELL_DN	0.00347222	0.0271266	0.341927	1.67892	0	132
GO_RECEPTOR_ACTIVITY	0.00483092	0.0311604	0.304634	1.67839	0	372
GSE6259_BCELL_VS_CD8_TCELL_UP	0.0035461	0.0271266	0.344518	1.67824	0	129
BIOCARTA_CCR3_PATHWAY	0.0170316	0.0639057	0.555675	1.67813	6	16
GO_CELL_CELL_ADHERENS_JUNCTION	0.0149254	0.0582133	0.501488	1.67778	5	24
KEGG_T_CELL_RECEPTOR_SIGNALING_PATHWAY	0.003003	0.0271266	0.37579	1.67727	0	75
GSE26912_TUMORICIDAL_VS_CTRL_MACROPHAGE_UP	0.00323625	0.0271266	0.345191	1.67717	0	116
TTCCGTT,MIR-191	0.0191847	0.0692756	0.516458	1.67706	7	20
MASSARWEH_TAMOXIFEN_RESISTANCE_UP	0.00497512	0.0312444	0.307921	1.67705	0	341
GO_WNT_SIGNALING_PATHWAY_CALCIUM_MODULATING_PATHWAY	0.0127551	0.0542712	0.480518	1.67649	4	28
V$TEF1_Q6	0.00327869	0.0271266	0.348233	1.67554	0	111
GSE27241_CTRL_VS_DIGOXIN_TREATED_CD4_TCELL_IN_TH17_POLARIZING_CONDITIONS_UP	0.00330033	0.0271266	0.346179	1.67533	0	114
V$FOXO1_01	0.00342466	0.0271266	0.342544	1.67502	0	126
GO_SENSORY_ORGAN_MORPHOGENESIS	0.0033557	0.0271266	0.366043	1.67495	0	91
GO_GLIOGENESIS	0.00303951	0.0271266	0.378174	1.67489	0	73
GO_RESPONSE_TO_CARBOHYDRATE	0.00338983	0.0271266	0.363442	1.67436	0	94
BIOCARTA_RAS_PATHWAY	0.0169903	0.0637944	0.504883	1.67425	6	22
GSE18281_CORTEX_VS_MEDULLA_THYMUS_DN	0.00330033	0.0271266	0.341832	1.67412	0	123
GSE3982_MEMORY_CD4_TCELL_VS_BCELL_UP	0.00334448	0.0271266	0.365178	1.67397	0	92
REACTOME_SIGNAL_TRANSDUCTION_BY_L1	0.0151515	0.0588887	0.496419	1.6736	5	25
GO_POSITIVE_REGULATION_OF_DENDRITE_DEVELOPMENT	0.00554017	0.0329254	0.434033	1.67333	1	40
GSE32034_UNTREATED_VS_ROSIGLIZATONE_TREATED_LY6C_LOW_MONOCYTE_UP	0.00304878	0.0271266	0.375369	1.67327	0	76
GSE36476_CTRL_VS_TSST_ACT_40H_MEMORY_CD4_TCELL_YOUNG_UP	0.00361011	0.0271266	0.338011	1.67317	0	150
GO_NEURON_PROJECTION_GUIDANCE	0.00308642	0.0271266	0.367328	1.67235	0	81
FINETTI_BREAST_CANCERS_KINOME_GRAY	0.0268293	0.0868738	0.566098	1.67207	10	15
GTGTCAA,MIR-514	0.00271739	0.0271266	0.422692	1.67201	0	43
GO_TRABECULA_MORPHOGENESIS	0.014742	0.0578395	0.514141	1.67185	5	21
MATTIOLI_MULTIPLE_MYELOMA_WITH_14Q32_TRANSLOCATIONS	0.0171149	0.064092	0.544336	1.67161	6	17
ATATGCA,MIR-448	0.00361011	0.0271266	0.337667	1.67146	0	150
GO_TRANSCRIPTION_FACTOR_ACTIVITY_RNA_POLYMERASE_II_TRANSCRIPTION_FACTOR_BINDING	0.003367	0.0271266	0.365474	1.67136	0	90
V$CEBPDELTA_Q6	0.00342466	0.0271266	0.341794	1.67136	0	126
GSE20198_UNTREATED_VS_IL12_IL18_TREATED_ACT_CD4_TCELL_UP	0.00352113	0.0271266	0.341413	1.67097	0	133
GO_POSITIVE_REGULATION_OF_CELL_DIFFERENTIATION	0.00507614	0.0316257	0.298947	1.67028	0	411
COULOUARN_TEMPORAL_TGFB1_SIGNATURE_DN	0.00315457	0.0271266	0.364447	1.6697	0	86
GSE19198_CTRL_VS_IL21_TREATED_TCELL_6H_DN	0.00343643	0.0271266	0.340534	1.6692	0	131
GO_EPIDERMAL_GROWTH_FACTOR_RECEPTOR_SIGNALING_PATHWAY	0.00826446	0.0416313	0.440994	1.66885	2	37
V$NFKB_Q6_01	0.00355872	0.0271266	0.341299	1.66882	0	135
GO_LAMELLIPODIUM	0.00328947	0.0271266	0.342084	1.66828	0	119
GSE9946_LISTERIA_INF_MATURE_VS_PROSTAGLANDINE2_TREATED_MATURE_DC_UP	0.0031348	0.0271266	0.367024	1.66781	0	82
GCM_SUFU	0.00303951	0.0271266	0.376549	1.6677	0	73
GO_REGULATION_OF_OSTEOCLAST_DIFFERENTIATION	0.00526316	0.0319405	0.453579	1.6676	1	34
RAY_TUMORIGENESIS_BY_ERBB2_CDC25A_DN	0.00328947	0.0271266	0.358964	1.66757	0	97
GSE42021_CD24HI_VS_CD24INT_TCONV_THYMUS_UP	0.00371747	0.0271266	0.337715	1.66738	0	142
GO_AXON_PART	0.00326797	0.0271266	0.353612	1.66709	0	102
V$AML_Q6	0.00343643	0.0271266	0.339968	1.66643	0	131
KEGG_JAK_STAT_SIGNALING_PATHWAY	0.00292398	0.0271266	0.376554	1.66642	0	71
GSE29618_MONOCYTE_VS_PDC_DAY7_FLU_VACCINE_DN	0.0035461	0.0271266	0.330729	1.66638	0	166
GO_REGIONALIZATION	0.00355872	0.0271266	0.340791	1.66633	0	135
GSE20484_MCSG_VS_CXCL4_MONOCYTE_DERIVED_MACROPHAGE_DN	0.00357143	0.0271266	0.33547	1.66555	0	152
OZEN_MIR125B1_TARGETS	0.014742	0.0578395	0.512072	1.66512	5	21
GSE29618_BCELL_VS_PDC_DN	0.00359712	0.0271266	0.336304	1.66496	0	151
MORF_PAX7	0.00330033	0.0271266	0.344031	1.66493	0	114
PID_AR_TF_PATHWAY	0.00280112	0.0271266	0.438363	1.66487	0	38
GSE37532_VISCERAL_ADIPOSE_TISSUE_VS_LN_DERIVED_TREG_CD4_TCELL_UP	0.0035461	0.0271266	0.341678	1.6644	0	129
BRCA1_DN.V1_DN	0.00569801	0.033118	0.398291	1.66421	1	54
V$IK2_01	0.00367647	0.0271266	0.338277	1.66344	0	141
V$SRF_C	0.00323625	0.0271266	0.342324	1.66324	0	116
GO_NEURON_PROJECTION	0.00574713	0.0332585	0.292931	1.66268	0	487
CHIANG_LIVER_CANCER_SUBCLASS_POLYSOMY7_DN	0.0168675	0.0633789	0.531753	1.66255	6	18
LIU_PROSTATE_CANCER_DN	0.004	0.027979	0.326439	1.66247	0	197
GCM_NF2	0.00458716	0.0302163	0.315153	1.66243	0	267
GSE16385_UNTREATED_VS_12H_ROSIGLITAZONE_TREATED_MACROPHAGE_DN	0.00334448	0.0271266	0.362641	1.66234	0	92
GSE13485_PRE_VS_POST_YF17D_VACCINATION_PBMC_UP	0.00315457	0.0271266	0.362834	1.66231	0	86
V$MYOD_Q6	0.00331126	0.0271266	0.343165	1.66208	0	115
GSE9988_ANTI_TREM1_VS_LOW_LPS_MONOCYTE_UP	0.00357143	0.0271266	0.335014	1.66173	0	145
GO_NEGATIVE_REGULATION_OF_MACROAUTOPHAGY	0.0195599	0.0699677	0.541076	1.6616	7	17
BIOCARTA_ALK_PATHWAY	0.0191847	0.0692756	0.511613	1.66133	7	20
PID_IL8_CXCR1_PATHWAY	0.0168675	0.0633789	0.53127	1.66104	6	18
GO_DEVELOPMENTAL_PIGMENTATION	0.0173267	0.0647036	0.498216	1.6609	6	23
GO_POSTSYNAPSE	0.003663	0.0271266	0.33171	1.66053	0	164
GO_INTERCALATED_DISC	0.0174129	0.0649165	0.49631	1.66046	6	24
GSE22025_UNTREATED_VS_TGFB1_AND_PROGESTERONE_TREATED_CD4_TCELL_UP	0.00334448	0.0271266	0.362172	1.66019	0	92
GO_HORMONE_BINDING	0.0194175	0.0697387	0.500564	1.65993	7	22
AAGCCAT,MIR-135A,MIR-135B	0.00423729	0.029015	0.319492	1.65984	0	225
MORF_FDXR	0.00361011	0.0271266	0.335213	1.65932	0	150
GCM_LTK	0.014742	0.0578395	0.510271	1.65927	5	21
REACTOME_OPIOID_SIGNALLING	0.00550964	0.0328975	0.404413	1.65912	1	50
GO_STEROL_METABOLIC_PROCESS	0.0030303	0.0271266	0.372737	1.65902	0	74
GSE8678_IL7R_LOW_VS_HIGH_EFF_CD8_TCELL_UP	0.00352113	0.0271266	0.338971	1.65902	0	133
GO_DORSAL_VENTRAL_PATTERN_FORMATION	0.00280112	0.0271266	0.436781	1.65886	0	38
GO_MUCOPOLYSACCHARIDE_METABOLIC_PROCESS	0.00564972	0.0329954	0.405182	1.65865	1	51
GSE32901_TH1_VS_TH17_ENRICHED_CD4_TCELL_UP	0.00369004	0.0271266	0.338611	1.65846	0	139
GSE26343_WT_VS_NFAT5_KO_MACROPHAGE_UP	0.00361011	0.0271266	0.330407	1.65837	0	163
BIOCARTA_HER2_PATHWAY	0.0168675	0.0633789	0.530361	1.6582	6	18
GO_REGULATION_OF_CYCLIC_NUCLEOTIDE_METABOLIC_PROCESS	0.00560224	0.0329254	0.409297	1.65693	1	47
GO_REGULATION_OF_BMP_SIGNALING_PATHWAY	0.00789474	0.0403324	0.450563	1.65651	2	34
GO_SIGNALING_RECEPTOR_ACTIVITY	0.00444444	0.0297165	0.310953	1.65625	0	278
V$AP4_Q6	0.00331126	0.0271266	0.341962	1.65625	0	115
GO_CHEMICAL_HOMEOSTASIS	0.0052356	0.0318022	0.29601	1.65602	0	424
FURUKAWA_DUSP6_TARGETS_PCI35_UP	0.0127877	0.0543407	0.454826	1.656	4	32
GSE20500_CTRL_VS_RARA_ANTAGONIST_TREATED_CD4_TCELL_UP	0.00355872	0.0271266	0.338336	1.65593	0	136
GSE34156_TLR1_TLR2_LIGAND_VS_NOD2_AND_TLR1_TLR2_LIGAND_6H_TREATED_MONOCYTE_UP	0.00323625	0.0271266	0.348557	1.65591	0	103
ACTGTAG,MIR-139	0.00338983	0.0271266	0.359403	1.65575	0	94
GO_REGULATION_OF_CARTILAGE_DEVELOPMENT	0.0195599	0.0699677	0.539155	1.65571	7	17
GSE25123_IL4_VS_IL4_AND_ROSIGLITAZONE_STIM_PPARG_KO_MACROPHAGE_DAY10_DN	0.00324675	0.0271266	0.339346	1.65557	0	117
GO_SYNAPSE_PART	0.00454545	0.0299861	0.313556	1.65553	0	262
TGCACTT,MIR-519C,MIR-519B,MIR-519A	0.00446429	0.0297597	0.306935	1.65553	0	305
GO_MUSCLE_ORGAN_DEVELOPMENT	0.00337838	0.0271266	0.338459	1.65542	0	124
REACTOME_G_ALPHA1213_SIGNALLING_EVENTS	0.0084507	0.0421556	0.392932	1.65541	2	56
BIOCARTA_ECM_PATHWAY	0.0190931	0.0690946	0.520532	1.65498	7	19
GO_RESPONSE_TO_NERVE_GROWTH_FACTOR	0.0152672	0.05908	0.466163	1.6548	5	29
V$AP2_Q6	0.00380228	0.027195	0.32823	1.65458	0	176
NAKAMURA_ADIPOGENESIS_EARLY_UP	0.00557103	0.0329254	0.433178	1.65443	1	39
GSE27859_MACROPHAGE_VS_DC_DN	0.00320513	0.0271266	0.351496	1.65437	0	101
REACTOME_SIGNALING_BY_FGFR1_MUTANTS	0.014742	0.0578395	0.508696	1.65415	5	21
GSE37416_12H_VS_24H_F_TULARENSIS_LVS_NEUTROPHIL_UP	0.0037037	0.0271266	0.331706	1.65407	0	160
GSE29164_CD8_TCELL_VS_CD8_TCELL_AND_IL12_TREATED_MELANOMA_DAY7_UP	0.00357143	0.0271266	0.328006	1.654	0	167
GSE9509_LPS_VS_LPS_AND_IL10_STIM_IL10_KO_MACROPHAGE_30MIN_DN	0.00358423	0.0271266	0.331285	1.6539	0	158
BERTUCCI_MEDULLARY_VS_DUCTAL_BREAST_CANCER_DN	0.00308642	0.0271266	0.363231	1.65369	0	81
GO_FACE_DEVELOPMENT	0.0150376	0.0585654	0.474459	1.65355	5	27
GO_EYE_DEVELOPMENT	0.00367647	0.0271266	0.336252	1.65348	0	141
GSE12366_GC_VS_NAIVE_BCELL_DN	0.00358423	0.0271266	0.331059	1.65344	0	154
GSE12963_ENV_NEF_VS_ENV_NEF_AND_VPR_DEFICIENT_HIV1_INF_CD4_TCELL_UP	0.003367	0.0271266	0.36151	1.65324	0	90
BRACHAT_RESPONSE_TO_CAMPTOTHECIN_UP	0.014742	0.0578395	0.508203	1.65254	5	21
GSE2770_TGFB_AND_IL4_VS_TGFB_AND_IL12_TREATED_ACT_CD4_TCELL_2H_UP	0.0030581	0.0271266	0.364781	1.65248	0	80
GO_CELL_LEADING_EDGE	0.00442478	0.0296594	0.31745	1.65224	0	235
GSE2770_UNTREATED_VS_IL12_TREATED_ACT_CD4_TCELL_2H_DN	0.00378788	0.027195	0.329687	1.65155	0	169
GSE6259_FLT3L_INDUCED_VS_WT_SPLENIC_DC_33D1_POS_UP	0.00324675	0.0271266	0.33805	1.65151	0	121
GSE24210_IL35_TREATED_VS_RESTING_TREG_DN	0.00291545	0.0271266	0.385748	1.65068	0	63
YTATTTTNR_V$MEF2_02	0.0049505	0.0312368	0.299974	1.6504	0	358
GO_CYTOPLASMIC_MICROTUBULE_ORGANIZATION	0.0105263	0.0482842	0.448813	1.65008	3	34
GO_REGULATION_OF_VESICLE_MEDIATED_TRANSPORT	0.00431034	0.0293795	0.312218	1.65003	0	253
BIOCARTA_CSK_PATHWAY	0.0218978	0.0753404	0.546336	1.64993	8	16
ALCALAY_AML_BY_NPM1_LOCALIZATION_UP	0.0030303	0.0271266	0.370645	1.64972	0	74
GSE24726_WT_VS_E2-2_KO_PDC_DAY6_POST_DELETION_DN	0.00355872	0.0271266	0.332487	1.64936	0	147
GSE14699_NAIVE_VS_ACT_CD8_TCELL_DN	0.00355872	0.0271266	0.336959	1.64919	0	136
GO_POSITIVE_REGULATION_OF_EMBRYONIC_DEVELOPMENT	0.0268293	0.0868738	0.558241	1.64886	10	15
GO_REGULATION_OF_NEUROLOGICAL_SYSTEM_PROCESS	0.0168675	0.0633789	0.527371	1.64885	6	18
IVANOVA_HEMATOPOIESIS_STEM_CELL_LONG_TERM	0.00358423	0.0271266	0.33027	1.64883	0	158
MODULE_241	0.00547945	0.0328201	0.42268	1.64882	1	41
GSE12003_MIR223_KO_VS_WT_BM_PROGENITOR_8D_CULTURE_UP	0.00292398	0.0271266	0.372515	1.64854	0	71
MORF_THRA	0.0191847	0.0692756	0.507654	1.64847	7	20
ONDER_CDH1_TARGETS_2_UP	0.00328947	0.0271266	0.338359	1.64843	0	120
GO_CLATHRIN_COATED_ENDOCYTIC_VESICLE_MEMBRANE	0.0104439	0.0479885	0.45049	1.64837	3	33
GSE12707_AT16L1_HYPOMORPH_VS_WT_THYMUS_DN	0.0058309	0.0335252	0.385286	1.64824	1	64
GO_CELLULAR_RESPONSE_TO_KETONE	0.00560224	0.0329254	0.433962	1.64815	1	38
GO_EPIDERMIS_DEVELOPMENT	0.00315457	0.0271266	0.359682	1.64787	0	86
GSE36476_CTRL_VS_TSST_ACT_72H_MEMORY_CD4_TCELL_YOUNG_UP	0.00359712	0.0271266	0.332803	1.64763	0	151
GSE29614_DAY3_VS_DAY7_TIV_FLU_VACCINE_PBMC_UP	0.00544959	0.0327589	0.443586	1.64724	1	35
GO_CLATHRIN_COATED_VESICLE_MEMBRANE	0.00564972	0.0329954	0.402311	1.64689	1	51
GO_POSITIVE_REGULATION_OF_NUCLEOTIDE_METABOLIC_PROCESS	0.00560224	0.0329254	0.416432	1.64645	1	44
GO_POSITIVE_REGULATION_OF_PURINE_NUCLEOTIDE_METABOLIC_PROCESS	0.00560224	0.0329254	0.416432	1.64645	1	44
GO_SYNAPTIC_SIGNALING	0.0033557	0.0271266	0.336191	1.64643	0	125
MODULE_324	0.00537634	0.0324796	0.416974	1.64631	1	42
REACTOME_G_ALPHA_S_SIGNALLING_EVENTS	0.0154639	0.0596165	0.457327	1.64623	5	31
GSE37532_WT_VS_PPARG_KO_LN_TREG_UP	0.00357143	0.0271266	0.332372	1.64613	0	149
ASTIER_INTEGRIN_SIGNALING	0.00543478	0.0327142	0.415944	1.64532	1	43
GSE22886_TH1_VS_TH2_48H_ACT_UP	0.00315457	0.0271266	0.35909	1.64516	0	86
GO_MYELOID_LEUKOCYTE_DIFFERENTIATION	0.00561798	0.0329254	0.395295	1.64504	1	53
GO_FOREBRAIN_DEVELOPMENT	0.00357143	0.0271266	0.3262	1.64489	0	167
GSE1460_CD4_THYMOCYTE_VS_THYMIC_STROMAL_CELL_UP	0.00357143	0.0271266	0.33155	1.64455	0	145
GO_REGULATION_OF_VESICLE_FUSION	0.00547945	0.0328201	0.421549	1.64441	1	41
GO_EMBRYONIC_PLACENTA_DEVELOPMENT	0.00560224	0.0329254	0.406187	1.64433	1	47
BILD_HRAS_ONCOGENIC_SIGNATURE	0.00357143	0.0271266	0.332003	1.64431	0	149
GO_TRANSCRIPTION_FACTOR_ACTIVITY_RNA_POLYMERASE_II_DISTAL_ENHANCER_SEQUENCE_SPECIFIC_BINDING	0.00817439	0.0413807	0.410531	1.64398	2	45
GO_REPRODUCTIVE_SYSTEM_DEVELOPMENT	0.00392157	0.0274881	0.321378	1.64394	0	199
REACTOME_PRE_NOTCH_TRANSCRIPTION_AND_TRANSLATION	0.0214797	0.0742776	0.517035	1.64386	8	19
GO_LYSINE_ACETYLATED_HISTONE_BINDING	0.0268293	0.0868738	0.556542	1.64384	10	15
GO_REGULATION_OF_PHOSPHOLIPASE_C_ACTIVITY	0.0218978	0.0753404	0.544232	1.64357	8	16
WNT_UP.V1_UP	0.00581395	0.033471	0.37304	1.64337	1	70
GSE43955_10H_VS_60H_ACT_CD4_TCELL_DN	0.0035461	0.0271266	0.337337	1.64325	0	129
MODULE_120	0.00560224	0.0329254	0.405842	1.64294	1	47
GO_MAP_KINASE_KINASE_KINASE_ACTIVITY	0.0268293	0.0868738	0.556053	1.6424	10	15
DAVICIONI_MOLECULAR_ARMS_VS_ERMS_UP	0.00438596	0.0294881	0.315643	1.6422	0	233
GO_SOMITE_DEVELOPMENT	0.00547945	0.0328201	0.420938	1.64203	1	41
GSE40274_FOXP3_VS_FOXP3_AND_HELIOS_TRANSDUCED_ACTIVATED_CD4_TCELL_UP	0.00566572	0.0330455	0.398767	1.64171	1	52
GO_CIRCULATORY_SYSTEM_PROCESS	0.00352113	0.0271266	0.335429	1.64168	0	133
GTGCCAA,MIR-96	0.00409836	0.0284581	0.321814	1.64156	0	200
V$AP4_Q6_01	0.00355872	0.0271266	0.335687	1.64138	0	135
V$TEF_Q6	0.00359712	0.0271266	0.336642	1.64128	0	134
V$P53_02	0.00355872	0.0271266	0.335649	1.64119	0	135
V$MEIS1AHOXA9_01	0.00561798	0.0329254	0.394355	1.64113	1	53
GO_TRANSMEMBRANE_RECEPTOR_PROTEIN_SERINE_THREONINE_KINASE_SIGNALING_PATHWAY	0.00323625	0.0271266	0.351654	1.64099	0	98
GSE19401_RETINOIC_ACID_VS_RETINOIC_ACID_AND_PAM2CSK4_STIM_FOLLICULAR_DC_UP	0.00327869	0.0271266	0.344249	1.64093	0	107
V$ZIC1_01	0.00357143	0.0271266	0.330428	1.64052	0	152
GO_NEGATIVE_REGULATION_OF_SYNAPTIC_TRANSMISSION	0.0127551	0.0542712	0.470051	1.63997	4	28
GO_CLATHRIN_MEDIATED_ENDOCYTOSIS	0.0174129	0.0649165	0.49016	1.63988	6	24
MEISSNER_NPC_HCP_WITH_H3K4ME2_AND_H3K27ME3	0.0058309	0.0335252	0.383124	1.63899	1	64
GSE339_EX_VIVO_VS_IN_CULTURE_CD8POS_DC_DN	0.00357143	0.0271266	0.330242	1.63866	0	148
DACOSTA_UV_RESPONSE_VIA_ERCC3_TTD_DN	0.00557103	0.0329254	0.382894	1.63861	1	61
GO_CARGO_RECEPTOR_ACTIVITY	0.0191847	0.0692756	0.504449	1.63807	7	20
GSE14415_ACT_TCONV_VS_ACT_NATURAL_TREG_UP	0.00649351	0.0361959	0.340509	1.63779	1	110
GSE8515_CTRL_VS_IL6_4H_STIM_MAC_DN	0.00307692	0.0271266	0.364879	1.63748	0	77
GO_EMBRYONIC_DIGIT_MORPHOGENESIS	0.0154639	0.0596165	0.454801	1.63713	5	31
GSE5589_WT_VS_IL6_KO_LPS_AND_IL10_STIM_MACROPHAGE_180MIN_UP	0.00557103	0.0329254	0.4286	1.63695	1	39
GO_REGULATION_OF_LIPID_METABOLIC_PROCESS	0.00357143	0.0271266	0.329706	1.636	0	148
KEGG_PATHWAYS_IN_CANCER	0.00401606	0.0280473	0.318634	1.63565	0	203
GSE9988_ANTI_TREM1_VS_LPS_MONOCYTE_UP	0.00371747	0.0271266	0.331198	1.63521	0	142
PID_PI3KCI_PATHWAY	0.00554017	0.0329254	0.424133	1.63517	1	40
V$FOXO4_01	0.00355872	0.0271266	0.334025	1.63483	0	136
GO_ACTIVATING_TRANSCRIPTION_FACTOR_BINDING	0.00546448	0.0328189	0.433986	1.63428	1	36
WEI_MIR34A_TARGETS	0.00323625	0.0271266	0.336309	1.63402	0	116
GSE2405_0H_VS_12H_A_PHAGOCYTOPHILUM_STIM_NEUTROPHIL_UP	0.00355872	0.0271266	0.333848	1.63396	0	136
GSE29949_MICROGLIA_BRAIN_VS_MONOCYTE_BONE_MARROW_UP	0.00323625	0.0271266	0.350044	1.63348	0	98
ENK_UV_RESPONSE_EPIDERMIS_DN	0.00510204	0.0316393	0.297875	1.63338	0	361
CTTTGTA,MIR-524	0.00452489	0.0299095	0.303977	1.63297	0	295
GSE19198_6H_VS_24H_IL21_TREATED_TCELL_DN	0.00367647	0.0271266	0.333378	1.63287	0	140
GARGALOVIC_RESPONSE_TO_OXIDIZED_PHOSPHOLIPIDS_YELLOW_DN	0.0243309	0.0811375	0.540669	1.63281	9	16
BIOCARTA_FCER1_PATHWAY	0.00817439	0.0413807	0.439609	1.63247	2	35
GSE26343_WT_VS_NFAT5_KO_MACROPHAGE_LPS_STIM_UP	0.00355872	0.0271266	0.329071	1.63241	0	147
GO_CELLULAR_RESPONSE_TO_CORTICOSTEROID_STIMULUS	0.0176768	0.0656981	0.484172	1.6323	6	25
GO_EPIDERMAL_GROWTH_FACTOR_RECEPTOR_BINDING	0.0192771	0.0695524	0.522012	1.63209	7	18
GSE22886_NAIVE_CD4_TCELL_VS_12H_ACT_TH1_UP	0.00358423	0.0271266	0.326963	1.63173	0	157
ROSS_AML_WITH_PML_RARA_FUSION	0.00543478	0.0327142	0.412494	1.63167	1	43
REACTOME_AXON_GUIDANCE	0.00352113	0.0271266	0.333348	1.6315	0	133
MODULE_181	0.00328947	0.0271266	0.351178	1.6314	0	97
GO_BLOOD_VESSEL_MORPHOGENESIS	0.00362319	0.0271266	0.326088	1.63093	0	161
chr17p11	0.00543478	0.0327142	0.412305	1.63093	1	43
GSE3691_IFN_PRODUCING_KILLER_DC_VS_PLASMACYTOID_DC_SPLEEN_UP	0.00358423	0.0271266	0.32663	1.63007	0	157
CAGCTTT,MIR-320	0.00383142	0.0272718	0.321631	1.62999	0	182
GSE11924_TFH_VS_TH2_CD4_TCELL_UP	0.00373134	0.0271535	0.323573	1.62998	0	173
GATAAGR_V$GATA_C	0.00346021	0.0271266	0.333191	1.62945	0	127
V$BRN2_01	0.00342466	0.0271266	0.333195	1.62931	0	126
GSE19374_UNINF_VS_LISTERIA_INFECTED_MACROPHAGE_DN	0.00330033	0.0271266	0.332641	1.62911	0	123
GSE3982_DC_VS_NEUTROPHIL_DN	0.00355872	0.0271266	0.333137	1.62891	0	135
GSE37605_FOXP3_FUSION_GFP_VS_IRES_GFP_TREG_C57BL6_UP	0.00319489	0.0271266	0.338864	1.62882	0	108
TCCAGAG,MIR-518C	0.00649351	0.0361959	0.338628	1.62875	1	110
GO_REGULATION_OF_PROTEIN_IMPORT	0.00325733	0.0271266	0.333736	1.6287	0	118
SMIRNOV_CIRCULATING_ENDOTHELIOCYTES_IN_CANCER_UP	0.00315457	0.0271266	0.355453	1.6285	0	86
GSE2770_UNTREATED_VS_TGFB_AND_IL4_TREATED_ACT_CD4_TCELL_2H_DN	0.00353357	0.0271266	0.326812	1.62819	0	153
GO_NEGATIVE_REGULATION_OF_DEVELOPMENTAL_PROCESS	0.00520833	0.0317668	0.295513	1.62795	0	382
VERRECCHIA_EARLY_RESPONSE_TO_TGFB1	0.0154639	0.0596165	0.4522	1.62777	5	31
TAGGTCA,MIR-192,MIR-215	0.0104439	0.0479885	0.444858	1.62776	3	33
TTGGGAG,MIR-150	0.00584795	0.0335653	0.367768	1.62753	1	71
GSE12963_UNINF_VS_ENV_AND_NEF_DEFICIENT_HIV1_INF_CD4_TCELL_UP	0.00609756	0.0346255	0.365075	1.62738	1	76
GSE42724_NAIVE_BCELL_VS_PLASMABLAST_DN	0.00367647	0.0271266	0.332163	1.62692	0	140
GSE2770_IL12_VS_IL4_TREATED_ACT_CD4_TCELL_48H_DN	0.00357143	0.0271266	0.328445	1.62669	0	149
GSE41176_UNSTIM_VS_ANTI_IGM_STIM_BCELL_24H_DN	0.00361011	0.0271266	0.322394	1.62624	0	168
V$GATA1_04	0.00638978	0.0359179	0.346233	1.62621	1	99
GSE11961_FOLLICULAR_BCELL_VS_PLASMA_CELL_DAY7_DN	0.00367647	0.0271266	0.330673	1.62605	0	141
GO_REGULATION_OF_COFACTOR_METABOLIC_PROCESS	0.0153453	0.0593134	0.446538	1.62582	5	32
GO_REGULATION_OF_COENZYME_METABOLIC_PROCESS	0.0153453	0.0593134	0.446538	1.62582	5	32
GO_SIN3_TYPE_COMPLEX	0.0243309	0.0811375	0.538246	1.6255	9	16
GO_POSITIVE_REGULATION_OF_MYELOID_CELL_DIFFERENTIATION	0.00842697	0.0420765	0.402084	1.6252	2	48
GSE41978_ID2_KO_AND_BIM_KO_VS_BIM_KO_KLRG1_LOW_EFFECTOR_CD8_TCELL_DN	0.00352113	0.0271266	0.332029	1.62505	0	133
GSE25123_ROSIGLITAZONE_VS_IL4_AND_ROSIGLITAZONE_STIM_PPARG_KO_MACROPHAGE_DAY10_DN	0.00367647	0.0271266	0.331767	1.62498	0	140
GO_CELL_CELL_ADHESION	0.00442478	0.0296594	0.307641	1.62475	0	258
GO_CARDIAC_SEPTUM_MORPHOGENESIS	0.019656	0.0700931	0.499618	1.62463	7	21
GO_PDZ_DOMAIN_BINDING	0.00842697	0.0420765	0.401901	1.62446	2	48
GSE16755_CTRL_VS_IFNA_TREATED_MAC_UP	0.003663	0.0271266	0.324441	1.62414	0	164
V$MYCMAX_02	0.00357143	0.0271266	0.322066	1.62405	0	167
RUAN_RESPONSE_TO_TNF_DN	0.00550964	0.0328975	0.395831	1.62391	1	50
GSE17186_BLOOD_VS_CORD_BLOOD_CD21LOW_TRANSITIONAL_BCELL_UP	0.00361011	0.0271266	0.323438	1.62363	0	165
E2F1_UP.V1_DN	0.00323625	0.0271266	0.334146	1.62351	0	116
V$CDPCR3HD_01	0.00332226	0.0271266	0.336951	1.62349	0	112
REACTOME_SIGNALING_BY_GPCR	0.00401606	0.0280473	0.316233	1.62333	0	203
GSE25123_WT_VS_PPARG_KO_MACROPHAGE_IL4_AND_ROSIGLITAZONE_STIM_DN	0.00358423	0.0271266	0.324975	1.62306	0	154
V$NF1_Q6_01	0.0035461	0.0271266	0.330491	1.62299	0	137
REACTOME_SIGNALING_BY_FGFR_IN_DISEASE	0.00673401	0.0371177	0.355323	1.62297	1	89
V$FREAC3_01	0.00343643	0.0271266	0.331	1.62247	0	131
GO_REGULATION_OF_TUMOR_NECROSIS_FACTOR_SUPERFAMILY_CYTOKINE_PRODUCTION	0.00566572	0.0330455	0.394079	1.6224	1	52
V$EGR_Q6	0.00361011	0.0271266	0.32319	1.62238	0	165
GSE19198_1H_VS_6H_IL21_TREATED_TCELL_UP	0.00569801	0.033118	0.388265	1.62231	1	54
chr17q11	0.00569801	0.033118	0.37343	1.62227	1	67
GSE18893_CTRL_VS_TNF_TREATED_TREG_2H_UP	0.00361011	0.0271266	0.323167	1.62227	0	165
GSE17974_0H_VS_72H_IN_VITRO_ACT_CD4_TCELL_UP	0.00347222	0.0271266	0.330381	1.62223	0	132
GO_ADENYLATE_CYCLASE_INHIBITING_G_PROTEIN_COUPLED_RECEPTOR_SIGNALING_PATHWAY	0.0243309	0.0811375	0.53716	1.62222	9	16
GO_GENITALIA_DEVELOPMENT	0.0238663	0.0798278	0.510098	1.62181	9	19
GO_POSITIVE_REGULATION_OF_MYELOID_LEUKOCYTE_DIFFERENTIATION	0.0127551	0.0542712	0.464842	1.6218	4	28
IL15_UP.V1_UP	0.00641026	0.0360179	0.344544	1.62165	1	101
GSE22886_NAIVE_VS_IGM_MEMORY_BCELL_UP	0.00330033	0.0271266	0.33104	1.62127	0	123
GO_TISSUE_MIGRATION	0.00821918	0.0414815	0.415614	1.62126	2	41
GO_ALPHA_BETA_T_CELL_ACTIVATION	0.0197531	0.0701321	0.448698	1.6212	7	30
MODULE_41	0.00404858	0.02823	0.312693	1.62028	0	210
GO_EXON_EXON_JUNCTION_COMPLEX	0.0191847	0.0692756	0.498916	1.6201	7	20
REACTOME_SIGNALING_BY_RHO_GTPASES	0.00615385	0.0348265	0.360491	1.62007	1	78
GSE21360_PRIMARY_VS_QUATERNARY_MEMORY_CD8_TCELL_DN	0.00380228	0.027195	0.322918	1.62	0	172
GSE24574_BCL6_HIGH_TFH_VS_TCONV_CD4_TCELL_DN	0.00328947	0.0271266	0.349129	1.61973	0	96
MODULE_6	0.00378788	0.027195	0.320189	1.61953	0	179
REN_ALVEOLAR_RHABDOMYOSARCOMA_UP	0.00817439	0.0413807	0.404408	1.61946	2	45
GO_REGULATION_OF_OSTEOBLAST_DIFFERENTIATION	0.00569801	0.033118	0.387575	1.61943	1	54
GO_RNA_POLYMERASE_II_ACTIVATING_TRANSCRIPTION_FACTOR_BINDING	0.019656	0.0700931	0.498003	1.61938	7	21
GSE29949_CD8_NEG_DC_SPLEEN_VS_DC_BRAIN_UP	0.0030303	0.0271266	0.363697	1.61879	0	74
GO_NEGATIVE_REGULATION_OF_PROTEIN_SERINE_THREONINE_KINASE_ACTIVITY	0.00673401	0.0371177	0.353782	1.6179	1	90
ATGAAGG,MIR-205	0.00655738	0.0364302	0.336252	1.61789	1	111
SYATTGTG_UNKNOWN	0.00343643	0.0271266	0.329977	1.61745	0	131
GO_MUSCLE_HYPERTROPHY	0.0243309	0.0811375	0.535571	1.61742	9	16
NAKAMURA_ADIPOGENESIS_LATE_UP	0.0030303	0.0271266	0.363288	1.61697	0	74
NAKAMURA_METASTASIS_MODEL_DN	0.019656	0.0700931	0.497229	1.61686	7	21
GSE26559_TCF1_KO_VS_WT_LIN_NEG_CELL_DN	0.00615385	0.0348265	0.360215	1.61655	1	77
GSE21063_WT_VS_NFATC1_KO_16H_ANTI_IGM_STIM_BCELL_DN	0.00867052	0.0427406	0.374473	1.61654	2	65
PID_ER_NONGENOMIC_PATHWAY	0.0179028	0.0659085	0.44398	1.61651	6	32
PID_AP1_PATHWAY	0.00560224	0.0329254	0.408818	1.61635	1	44
GSE31082_DN_VS_DP_THYMOCYTE_DN	0.00371747	0.0271266	0.318311	1.61627	0	178
GSE24634_IL4_VS_CTRL_TREATED_NAIVE_CD4_TCELL_DAY5_UP	0.0033557	0.0271266	0.33003	1.61626	0	125
GSE40273_XBP1_KO_VS_WT_TREG_DN	0.00347222	0.0271266	0.329123	1.61605	0	132
V$TFIIA_Q6	0.00357143	0.0271266	0.32572	1.61563	0	145
GO_REGULATION_OF_CAMP_METABOLIC_PROCESS	0.00554017	0.0329254	0.419012	1.61543	1	40
MODULE_291	0.00826446	0.0416313	0.426825	1.61523	2	37
GO_DENDRITE	0.00423729	0.029015	0.310847	1.61492	0	225
GO_RETINOIC_ACID_RECEPTOR_BINDING	0.019656	0.0700931	0.496617	1.61487	7	21
GO_DNA_ALKYLATION	0.0178117	0.0658729	0.454853	1.61465	6	29
GO_DNA_METHYLATION	0.0178117	0.0658729	0.454853	1.61465	6	29
CAGGTCC,MIR-492	0.00840336	0.0420452	0.425068	1.61437	2	38
PARK_APL_PATHOGENESIS_DN	0.0105263	0.0482842	0.439058	1.61422	3	34
GSE28726_ACT_CD4_TCELL_VS_ACT_VA24NEG_NKTCELL_DN	0.00380228	0.027195	0.319595	1.6141	0	177
V$HEB_Q6	0.00355872	0.0271266	0.329774	1.61402	0	136
GSE3039_ALPHABETA_CD8_TCELL_VS_B2_BCELL_UP	0.00357143	0.0271266	0.32539	1.614	0	145
V$ZF5_B	0.00367647	0.0271266	0.324882	1.61399	0	156
GSE25088_ROSIGLITAZONE_VS_IL4_AND_ROSIGLITAZONE_STIM_STAT6_KO_MACROPHAGE_DAY10_UP	0.00357143	0.0271266	0.325259	1.61394	0	148
GSE7460_TCONV_VS_TREG_THYMUS_UP	0.0035461	0.0271266	0.331294	1.61382	0	129
TAATAAT,MIR-126	0.00342466	0.0271266	0.329943	1.61341	0	126
GSE5589_WT_VS_IL6_KO_LPS_STIM_MACROPHAGE_45MIN_UP	0.00357143	0.0271266	0.325193	1.61302	0	145
GSE41087_WT_VS_FOXP3_MUT_ANTI_CD3_CD28_STIM_CD4_TCELL_UP	0.00347222	0.0271266	0.328342	1.61221	0	132
GO_NEGATIVE_REGULATION_OF_OSSIFICATION	0.0105263	0.0482842	0.438509	1.6122	3	34
V$STAT3_02	0.00621118	0.0350469	0.354344	1.61135	1	83
MODULE_524	0.0238663	0.0798278	0.506801	1.61132	9	19
CATGTAA,MIR-496	0.00353357	0.0271266	0.330838	1.61123	0	128
REACTOME_THE_ROLE_OF_NEF_IN_HIV1_REPLICATION_AND_DISEASE_PATHOGENESIS	0.0199005	0.0705054	0.481587	1.6112	7	24
GO_PHOSPHOLIPID_TRANSPORT	0.0179028	0.0659085	0.442404	1.61077	6	32
GSE7509_DC_VS_MONOCYTE_WITH_FCGRIIB_STIM_UP	0.00373134	0.0271535	0.319741	1.61067	0	173
GSE13411_NAIVE_VS_SWITCHED_MEMORY_BCELL_UP	0.00835655	0.0419368	0.376335	1.61054	2	61
GSE25123_WT_VS_PPARG_KO_MACROPHAGE_UP	0.00324675	0.0271266	0.329644	1.61045	0	121
ACATTCC,MIR-1,MIR-206	0.00414938	0.0286287	0.310253	1.61024	0	219
GO_ACTIN_BINDING	0.00888889	0.0433207	0.307785	1.60995	1	241
chr7q36	0.00806452	0.0410113	0.407673	1.60959	2	42
REACTOME_SIGNALING_BY_FGFR_MUTANTS	0.0127551	0.0542712	0.4613	1.60944	4	28
GO_CARDIAC_MUSCLE_TISSUE_MORPHOGENESIS	0.026506	0.0860549	0.514739	1.60935	10	18
GO_G_PROTEIN_COUPLED_RECEPTOR_SIGNALING_PATHWAY	0.00401606	0.0280473	0.313226	1.60922	0	204
GSE21033_3H_VS_12H_POLYIC_STIM_DC_UP	0.00325733	0.0271266	0.329707	1.60904	0	118
REACTOME_PHOSPHOLIPID_METABOLISM	0.00355872	0.0271266	0.328732	1.60893	0	136
GO_REGULATION_OF_GROWTH	0.00507614	0.0316257	0.294493	1.60842	0	350
HALLMARK_COAGULATION	0.00543478	0.0327142	0.406555	1.60818	1	43
GSE39022_LN_VS_SPLEEN_DC_DN	0.00358423	0.0271266	0.322237	1.60815	0	157
MODULE_322	0.00806452	0.0410113	0.407159	1.60756	2	42
BIOCARTA_PAR1_PATHWAY	0.0199501	0.0705313	0.466926	1.6074	7	26
MIYAGAWA_TARGETS_OF_EWSR1_ETS_FUSIONS_UP	0.00359712	0.0271266	0.324512	1.60658	0	151
BURTON_ADIPOGENESIS_1	0.020202	0.0711391	0.476523	1.60652	7	25
GO_CANONICAL_WNT_SIGNALING_PATHWAY	0.00561798	0.0329254	0.38603	1.60648	1	53
GSE5589_IL6_KO_VS_IL10_KO_LPS_AND_IL10_STIM_MACROPHAGE_45MIN_DN	0.00357143	0.0271266	0.323862	1.60641	0	145
GSE15930_NAIVE_VS_48H_IN_VITRO_STIM_IL12_CD8_TCELL_UP	0.0035461	0.0271266	0.329661	1.60586	0	129
GO_REGULATION_OF_CHOLESTEROL_TRANSPORT	0.02457	0.0817713	0.493703	1.60539	9	21
GO_REGULATION_OF_STEROL_TRANSPORT	0.02457	0.0817713	0.493703	1.60539	9	21
IVANOVA_HEMATOPOIESIS_STEM_CELL	0.00361011	0.0271266	0.32375	1.60533	0	143
KEGG_GNRH_SIGNALING_PATHWAY	0.00840336	0.0420452	0.38068	1.60465	2	58
GSE9037_CTRL_VS_LPS_1H_STIM_BMDM_UP	0.00357143	0.0271266	0.323313	1.60436	0	144
REACTOME_ION_TRANSPORT_BY_P_TYPE_ATPASES	0.0291971	0.0919283	0.531236	1.60433	11	16
V$OLF1_01	0.00357143	0.0271266	0.323226	1.60385	0	148
HALLMARK_ANDROGEN_RESPONSE	0.00600601	0.0342808	0.359287	1.60362	1	75
GSE16385_UNTREATED_VS_12H_ROSIGLITAZONE_IL4_TREATED_MACROPHAGE_UP	0.00380228	0.027195	0.319649	1.6036	0	172
GO_CELLULAR_RESPONSE_TO_ORGANIC_CYCLIC_COMPOUND	0.00458716	0.0302163	0.303798	1.6035	0	266
GO_REGULATION_OF_MORPHOGENESIS_OF_A_BRANCHING_STRUCTURE	0.0238663	0.0798278	0.504289	1.60334	9	19
IL2_UP.V1_UP	0.00655738	0.0364302	0.351297	1.60288	1	88
CREIGHTON_ENDOCRINE_THERAPY_RESISTANCE_5	0.00442478	0.0296594	0.297028	1.60285	0	304
V$TAL1BETAITF2_01	0.00342466	0.0271266	0.327743	1.60265	0	126
PID_IL2_PI3K_PATHWAY	0.0180412	0.0660203	0.445168	1.60246	6	31
ABE_VEGFA_TARGETS_2HR	0.0238663	0.0798278	0.503952	1.60227	9	19
GSE360_CTRL_VS_L_DONOVANI_DC_DN	0.00643087	0.0361033	0.335899	1.60225	1	106
GO_LOCOMOTION	0.00574713	0.0332585	0.282244	1.60202	0	487
GSE21546_WT_VS_SAP1A_KO_DP_THYMOCYTES_DN	0.00643087	0.0361033	0.33585	1.60201	1	106
GSE4984_LPS_VS_VEHICLE_CTRL_TREATED_DC_UP	0.00323625	0.0271266	0.336672	1.60173	0	104
FIRESTEIN_CTNNB1_PATHWAY	0.0178571	0.0658729	0.459043	1.60157	6	28
RUIZ_TNC_TARGETS_UP	0.0100334	0.0466328	0.349316	1.60126	2	92
RASHI_RESPONSE_TO_IONIZING_RADIATION_3	0.0108992	0.0485423	0.431206	1.60126	3	35
GSE41867_DAY8_VS_DAY15_LCMV_ARMSTRONG_EFFECTOR_CD8_TCELL_DN	0.00854701	0.0424139	0.39602	1.60119	2	49
GO_MEMBRANE_MICRODOMAIN	0.00357143	0.0271266	0.317527	1.60116	0	167
GSE30971_2H_VS_4H_LPS_STIM_MACROPHAGE_WBP7_KO_UP	0.00340136	0.0271266	0.333162	1.60073	0	113
GO_ACTIVATION_OF_JUN_KINASE_ACTIVITY	0.0199005	0.0705054	0.478373	1.60045	7	24
REACTOME_G_PROTEIN_BETA_GAMMA_SIGNALLING	0.02457	0.0817713	0.492026	1.59994	9	21
GO_PEPTIDYL_TYROSINE_AUTOPHOSPHORYLATION	0.0199005	0.0705054	0.478218	1.59993	7	24
GSE40666_STAT1_KO_VS_STAT4_KO_CD8_TCELL_DN	0.0108992	0.0485423	0.399526	1.59991	3	45
GO_POSITIVE_REGULATION_OF_CELL_GROWTH	0.00649351	0.0361959	0.350332	1.59968	1	87
TAATGTG,MIR-323	0.00324675	0.0271266	0.327439	1.59967	0	121
VALK_AML_CLUSTER_15	0.02457	0.0817713	0.491924	1.59961	9	21
CACTTTG,MIR-520G,MIR-520H	0.00367647	0.0271266	0.321982	1.59958	0	156
GO_SENSORY_PERCEPTION_OF_CHEMICAL_STIMULUS	0.0199501	0.0705313	0.464652	1.59957	7	26
REACTOME_NEPHRIN_INTERACTIONS	0.0341463	0.103026	0.541498	1.59941	13	15
DURAND_STROMA_S_UP	0.00664452	0.0366851	0.331806	1.5987	1	112
TGTYNNNNNRGCARM_UNKNOWN	0.011236	0.049269	0.395522	1.59868	3	48
GO_NEGATIVE_REGULATION_OF_CELL_DEVELOPMENT	0.00343643	0.0271266	0.326107	1.59849	0	131
GSE36392_TYPE_2_MYELOID_VS_NEUTROPHIL_IL25_TREATED_LUNG_UP	0.00328947	0.0271266	0.327772	1.59848	0	119
GCANCTGNY_V$MYOD_Q6	0.00581395	0.033471	0.282576	1.59835	0	480
PID_CD8_TCR_PATHWAY	0.00840336	0.0420452	0.420769	1.59805	2	38
GSE2405_S_AUREUS_VS_A_PHAGOCYTOPHILUM_NEUTROPHIL_DN	0.00358423	0.0271266	0.320131	1.59788	0	155
GSE14415_NATURAL_TREG_VS_TCONV_UP	0.00649351	0.0361959	0.332195	1.5978	1	110
GSE7764_IL15_TREATED_VS_CTRL_NK_CELL_24H_DN	0.00324675	0.0271266	0.327453	1.59755	0	117
MODULE_122	0.0131579	0.0552972	0.43449	1.59742	4	34
CAGCAGG,MIR-370	0.00647249	0.0361959	0.336227	1.59733	1	103
EPPERT_CE_HSC_LSC	0.0313253	0.0966794	0.510827	1.59712	12	18
REACTOME_HEPARAN_SULFATE_HEPARIN_HS_GAG_METABOLISM	0.0218447	0.0752104	0.481588	1.597	8	22
WGGAATGY_V$TEF1_Q6	0.00380228	0.027195	0.316191	1.59691	0	177
CTACTGT,MIR-199A	0.0035461	0.0271266	0.327789	1.59674	0	129
GSE37319_WT_VS_RC3H1_KO_CD44LOW_CD8_TCELL_DN	0.00607903	0.0345939	0.360526	1.59673	1	73
TGCTGAY_UNKNOWN	0.00444444	0.0297165	0.29857	1.59663	0	283
GSE6269_STAPH_AUREUS_VS_STREP_PNEUMO_INF_PBMC_UP	0.00325733	0.0271266	0.327148	1.59655	0	118
GSE19401_RETINOIC_ACID_VS_RETINOIC_ACID_AND_PAM2CSK4_STIM_FOLLICULAR_DC_DN	0.00357143	0.0271266	0.321537	1.59638	0	152
GSE40685_NAIVE_CD4_TCELL_VS_TREG_UP	0.00369004	0.0271266	0.325876	1.59609	0	139
MIKKELSEN_NPC_HCP_WITH_H3K4ME3_AND_H3K27ME3	0.00862069	0.0426526	0.366067	1.59552	2	68
GSE30971_2H_VS_4H_LPS_STIM_MACROPHAGE_WBP7_HET_DN	0.00595238	0.0340621	0.359832	1.5955	1	72
BROWNE_HCMV_INFECTION_48HR_DN	0.00434783	0.0294633	0.298162	1.59546	0	281
GO_REGULATION_OF_JNK_CASCADE	0.00653595	0.0363717	0.338411	1.59543	1	102
DAIRKEE_TERT_TARGETS_DN	0.00609756	0.0346255	0.357792	1.59491	1	76
GSE17974_IL4_AND_ANTI_IL12_VS_UNTREATED_6H_ACT_CD4_TCELL_UP	0.00867052	0.0427406	0.369451	1.59486	2	65
GSE10240_CTRL_VS_IL17_AND_IL22_STIM_PRIMARY_BRONCHIAL_EPITHELIAL_CELLS_DN	0.00358423	0.0271266	0.32201	1.5948	0	146
GO_DIGESTIVE_TRACT_MORPHOGENESIS	0.0218447	0.0752104	0.480848	1.59455	8	22
V$E4BP4_01	0.00361011	0.0271266	0.322063	1.59422	0	150
GO_REGULATION_OF_EXTENT_OF_CELL_GROWTH	0.00826446	0.0416313	0.38857	1.59412	2	50
GSE45365_WT_VS_IFNAR_KO_CD8A_DC_MCMV_INFECTION_UP	0.00367647	0.0271266	0.3188	1.59407	0	162
GCTTGAA,MIR-498	0.00923077	0.0444349	0.354951	1.59293	2	77
GSE360_T_GONDII_VS_M_TUBERCULOSIS_MAC_UP	0.00361011	0.0271266	0.321151	1.59244	0	143
GO_MESENCHYMAL_CELL_DIFFERENTIATION	0.0168539	0.0633789	0.393979	1.59244	5	48
V$GATA_Q6	0.00854701	0.0424139	0.366535	1.59232	2	67
GO_DIGESTIVE_SYSTEM_DEVELOPMENT	0.0111111	0.0489469	0.375886	1.59173	3	57
GSE15750_WT_VS_TRAF6KO_DAY10_EFF_CD8_TCELL_DN	0.00584795	0.0335653	0.359642	1.59157	1	71
GSE6875_WT_VS_FOXP3_KO_TREG_UP	0.00358423	0.0271266	0.321336	1.59146	0	146
GSE39820_TGFBETA3_IL6_VS_TGFBETA3_IL6_IL23A_TREATED_CD4_TCELL_UP	0.00361011	0.0271266	0.321499	1.59143	0	150
LANDIS_BREAST_CANCER_PROGRESSION_DN	0.0131579	0.0552972	0.432833	1.59133	4	34
AGCYRWTTC_UNKNOWN	0.0140845	0.0574816	0.374824	1.59093	4	59
V$HP1SITEFACTOR_Q6	0.00324675	0.0271266	0.325625	1.59081	0	121
GSE22886_TCELL_VS_BCELL_NAIVE_UP	0.00361011	0.0271266	0.316922	1.59069	0	163
ROSS_ACUTE_MYELOID_LEUKEMIA_CBF	0.00842697	0.0420765	0.382235	1.59069	2	53
LEE_BMP2_TARGETS_UP	0.00497512	0.0312444	0.289443	1.59057	0	369
V$E47_01	0.00355872	0.0271266	0.325262	1.5904	0	135
CCCACAT,MIR-299-3P	0.00819672	0.0414309	0.422171	1.58979	2	36
GSE30083_SP1_VS_SP4_THYMOCYTE_DN	0.00359712	0.0271266	0.326078	1.58977	0	134
KEGG_AXON_GUIDANCE	0.00874636	0.0428453	0.371445	1.58903	2	64
GO_REGULATION_OF_EXOCYTOSIS	0.00630915	0.0354796	0.346788	1.5888	1	86
GSE3691_CONVENTIONAL_VS_PLASMACYTOID_DC_SPLEEN_UP	0.00367647	0.0271266	0.324373	1.58877	0	140
REACTOME_GABA_RECEPTOR_ACTIVATION	0.0238663	0.0798278	0.499603	1.58844	9	19
GO_DEVELOPMENTAL_GROWTH	0.0037594	0.027195	0.314716	1.58838	0	175
GSE37301_CD4_TCELL_VS_GRANULOCYTE_MONOCYTE_PROGENITOR_DN	0.0033557	0.0271266	0.324185	1.58764	0	125
WONG_ENDMETRIUM_CANCER_DN	0.0390244	0.113384	0.537478	1.58754	15	15
GO_REGULATION_OF_GTPASE_ACTIVITY	0.00520833	0.0317668	0.287546	1.58741	0	391
GO_CENTRAL_NERVOUS_SYSTEM_NEURON_DIFFERENTIATION	0.00874636	0.0428453	0.371061	1.58739	2	64
GSE45365_NK_CELL_VS_BCELL_UP	0.00359712	0.0271266	0.320591	1.58717	0	151
chr22q12	0.0113314	0.0496062	0.370984	1.58709	3	62
GO_POSITIVE_REGULATION_OF_EPITHELIAL_CELL_DIFFERENTIATION	0.0242718	0.0810824	0.47856	1.58696	9	22
GSE15930_NAIVE_VS_24H_IN_VITRO_STIM_INFAB_CD8_TCELL_UP	0.00352113	0.0271266	0.324091	1.58619	0	133
GSE7460_CTRL_VS_TGFB_TREATED_ACT_TREG_DN	0.00649351	0.0361959	0.329771	1.58615	1	110
GO_SWI_SNF_SUPERFAMILY_TYPE_COMPLEX	0.0058309	0.0335252	0.370631	1.58599	1	63
GO_POSITIVE_REGULATION_OF_DEVELOPMENTAL_GROWTH	0.00607903	0.0345939	0.352005	1.58535	1	79
GSE3039_ALPHAALPHA_CD8_TCELL_VS_B2_BCELL_UP	0.00337838	0.0271266	0.324101	1.5852	0	124
GSE43863_TH1_VS_TFH_EFFECTOR_CD4_TCELL_DN	0.003663	0.0271266	0.316646	1.58511	0	164
DAVICIONI_MOLECULAR_ARMS_VS_ERMS_DN	0.00626959	0.0353317	0.348808	1.58503	1	82
CTGTTAC,MIR-194	0.00609756	0.0346255	0.355566	1.58499	1	76
chr15q13	0.027027	0.0873549	0.487291	1.58454	10	21
GO_MUSCLE_FIBER_DEVELOPMENT	0.0342298	0.103165	0.51591	1.58432	13	17
GSE3720_UNSTIM_VS_LPS_STIM_VD2_GAMMADELTA_TCELL_DN	0.00874636	0.0428453	0.370299	1.58412	2	64
GSE16450_CTRL_VS_IFNA_6H_STIM_IMMATURE_NEURON_CELL_LINE_DN	0.00371747	0.0271266	0.320839	1.58406	0	142
GO_CELLULAR_RESPONSE_TO_RETINOIC_ACID	0.0222772	0.0759765	0.475121	1.58391	8	23
V$SMAD4_Q6	0.00361011	0.0271266	0.319413	1.58382	0	143
GTCAGGA,MIR-378	0.0110803	0.0489469	0.410763	1.58362	3	40
GSE8384_CTRL_VS_B_ABORTUS_4H_MAC_CELL_LINE_DN	0.00358423	0.0271266	0.317191	1.58354	0	158
SUNG_METASTASIS_STROMA_UP	0.00874636	0.0428453	0.370156	1.58351	2	64
ATF2_UP.V1_DN	0.00655738	0.0364302	0.347047	1.58349	1	88
V$FOXD3_01	0.00657895	0.0365348	0.340822	1.58329	1	97
MARIADASON_REGULATED_BY_HISTONE_ACETYLATION_DN	0.00821918	0.0414815	0.405759	1.58282	2	41
DUTERTRE_ESTRADIOL_RESPONSE_24HR_DN	0.0045045	0.029834	0.292072	1.58269	0	315
GSE4984_UNTREATED_VS_GALECTIN1_TREATED_DC_UP	0.00346021	0.0271266	0.323619	1.58264	0	127
V$CDPCR1_01	0.0113314	0.0496062	0.369925	1.58256	3	62
GO_NEGATIVE_REGULATION_OF_KINASE_ACTIVITY	0.00362319	0.0271266	0.316369	1.58232	0	161
HALLMARK_APICAL_SURFACE	0.0238663	0.0798278	0.497577	1.582	9	19
XU_HGF_SIGNALING_NOT_VIA_AKT1_6HR	0.0238663	0.0798278	0.49754	1.58188	9	19
MODULE_47	0.00615385	0.0348265	0.345496	1.58175	1	84
GCM_USP6	0.0112676	0.0493754	0.375338	1.58129	3	56
GSE40274_CTRL_VS_FOXP3_AND_HELIOS_TRANSDUCED_ACTIVATED_CD4_TCELL_UP	0.00358423	0.0271266	0.316856	1.58129	0	157
V$PR_02	0.00600601	0.0342808	0.354233	1.58106	1	75
V$IPF1_Q4	0.00353357	0.0271266	0.324587	1.58079	0	128
GO_HEPARIN_BINDING	0.010929	0.0486262	0.419708	1.58051	3	36
GO_REGULATION_OF_MYELOID_LEUKOCYTE_DIFFERENTIATION	0.0112045	0.0491633	0.374927	1.5804	3	58
GO_ENDODERM_DEVELOPMENT	0.0199501	0.0705313	0.459024	1.58019	7	26
GO_HISTONE_METHYLTRANSFERASE_COMPLEX	0.0142045	0.0574816	0.37143	1.58	4	60
GSE5455_HEALTHY_VS_TUMOR_BEARING_MOUSE_SPLEEN_MONOCYTE_DN	0.00342466	0.0271266	0.323051	1.57971	0	126
GO_POSITIVE_REGULATION_OF_CYTOPLASMIC_TRANSPORT	0.00387597	0.0273553	0.313045	1.5796	0	180
TGTTTGY_V$HNF3_Q6	0.00497512	0.0312444	0.287989	1.57958	0	353
GO_NEGATIVE_REGULATION_OF_NEURON_APOPTOTIC_PROCESS	0.00581395	0.033471	0.358526	1.57943	1	70
GO_LIPID_PHOSPHORYLATION	0.00842697	0.0420765	0.375154	1.57918	2	55
GO_POSITIVE_REGULATION_OF_CHEMOTAXIS	0.0112045	0.0491633	0.399416	1.57918	3	44
MORF_BMPR2	0.0199501	0.0705313	0.458691	1.57905	7	26
GO_NEGATIVE_REGULATION_OF_NEURON_DIFFERENTIATION	0.00628931	0.0354129	0.344395	1.57904	1	85
BANDRES_RESPONSE_TO_CARMUSTIN_WITHOUT_MGMT_48HR_DN	0.0242718	0.0810824	0.475906	1.57816	9	22
PID_RHOA_REG_PATHWAY	0.0175439	0.0652951	0.452768	1.57796	6	27
GSE37532_VISCERAL_ADIPOSE_TISSUE_VS_LN_DERIVED_TREG_CD4_TCELL_DN	0.00974026	0.0459913	0.331611	1.57789	2	105
GSE19941_UNSTIM_VS_LPS_STIM_IL10_KO_MACROPHAGE_UP	0.0100334	0.0466328	0.344167	1.57766	2	92
MIKKELSEN_MCV6_HCP_WITH_H3K27ME3	0.00874636	0.0428453	0.368736	1.57744	2	64
GSE1460_NAIVE_CD4_TCELL_ADULT_BLOOD_VS_THYMIC_STROMAL_CELL_UP	0.00357143	0.0271266	0.317825	1.57705	0	148
GSE34156_UNTREATED_VS_24H_NOD2_AND_TLR1_TLR2_LIGAND_TREATED_MONOCYTE_DN	0.00867052	0.0427406	0.365254	1.57674	2	65
GSE29618_BCELL_VS_MONOCYTE_DAY7_FLU_VACCINE_DN	0.00343643	0.0271266	0.321615	1.57647	0	131
GOBERT_CORE_OLIGODENDROCYTE_DIFFERENTIATION	0.0200501	0.0708286	0.452292	1.5763	7	27
V$SP1_Q6_01	0.00361011	0.0271266	0.313956	1.5758	0	163
REACTOME_SIGNALING_BY_ROBO_RECEPTOR	0.0242718	0.0810824	0.475187	1.57578	9	22
V$HMEF2_Q6	0.0112045	0.0491633	0.373796	1.57564	3	58
GSE34006_WT_VS_A2AR_KO_TREG_UP	0.00330033	0.0271266	0.321685	1.57545	0	123
KEGG_ACUTE_MYELOID_LEUKEMIA	0.017094	0.0640497	0.389622	1.57532	5	49
GCM_DLG1	0.0111421	0.0489832	0.368103	1.57531	3	61
GO_METENCEPHALON_DEVELOPMENT	0.0140449	0.0574816	0.378496	1.57513	4	53
BIOCARTA_NTHI_PATHWAY	0.028777	0.0911772	0.484986	1.57486	11	20
MODULE_33	0.00358423	0.0271266	0.315502	1.57453	0	157
GO_OSSIFICATION	0.00328947	0.0271266	0.322145	1.57452	0	122
MCCLUNG_COCAINE_REWARD_5D	0.0140056	0.0574816	0.388932	1.57448	4	47
GO_G_PROTEIN_COUPLED_RECEPTOR_ACTIVITY	0.00630915	0.0354796	0.343627	1.57431	1	86
GO_REGULATION_OF_TRANSCRIPTION_FACTOR_IMPORT_INTO_NUCLEUS	0.00854701	0.0424139	0.362263	1.57376	2	67
V$ZIC2_01	0.00357143	0.0271266	0.317276	1.57375	0	145
GSE29949_MICROGLIA_BRAIN_VS_CD8_POS_DC_SPLEEN_UP	0.00362319	0.0271266	0.314578	1.57336	0	161
GSE39820_TGFBETA1_IL6_VS_TGFBETA1_IL6_IL23A_TREATED_CD4_TCELL_UP	0.00362319	0.0271266	0.314558	1.57326	0	161
V$PAX5_01	0.00970874	0.0459913	0.33674	1.5714	2	98
VANHARANTA_UTERINE_FIBROID_UP	0.0247525	0.0822349	0.47132	1.57124	9	23
GO_NEUROEPITHELIAL_CELL_DIFFERENTIATION	0.0204082	0.0715251	0.450276	1.57098	7	28
GCTNWTTGK_UNKNOWN	0.0037594	0.027195	0.311257	1.57092	0	175
GO_SENSORY_ORGAN_DEVELOPMENT	0.00806452	0.0410113	0.306719	1.57078	1	202
GSE22611_NOD2_TRANSD_VS_CTRL_TRANSD_HEK293_MDP_STIM_2H_UP	0.0101695	0.0469218	0.340817	1.57012	2	94
ACACTAC,MIR-142-3P	0.00974026	0.0459913	0.329973	1.57009	2	105
V$MYCMAX_03	0.0037037	0.0271266	0.310661	1.56969	0	174
GO_STEROID_HORMONE_RECEPTOR_BINDING	0.0111421	0.0489832	0.366759	1.56956	3	61
CAAGGAT,MIR-362	0.0140056	0.0574816	0.396919	1.5693	4	44
GO_EAR_MORPHOGENESIS	0.0140845	0.0574816	0.39085	1.56916	4	46
GSE6259_33D1_POS_DC_VS_CD4_TCELL_DN	0.00645161	0.036174	0.326715	1.56901	1	109
KLEIN_PRIMARY_EFFUSION_LYMPHOMA_UP	0.0110193	0.0489331	0.414504	1.5686	3	37
GO_REGULATION_OF_SULFUR_METABOLIC_PROCESS	0.0364964	0.107848	0.5193	1.56828	14	16
GSE31622_WT_VS_KLF3_KO_BCELL_DN	0.00359712	0.0271266	0.321625	1.56807	0	134
REACTOME_INTEGRATION_OF_ENERGY_METABOLISM	0.00854701	0.0424139	0.360939	1.56801	2	67
MAYBURD_RESPONSE_TO_L663536_UP	0.0223881	0.0762017	0.468672	1.56799	8	24
GO_CHROMATIN_BINDING	0.00446429	0.0297597	0.288866	1.56789	0	318
GAGCCAG,MIR-149	0.00986842	0.0462526	0.337497	1.56784	2	97
GO_PROTEIN_KINASE_ACTIVITY	0.00507614	0.0316257	0.279565	1.56778	0	419
GSE3982_MAC_VS_NEUTROPHIL_DN	0.00647249	0.0361959	0.322622	1.56752	1	116
RRAGTTGT_UNKNOWN	0.00353357	0.0271266	0.314566	1.56718	0	153
BERNARD_PPAPDC1B_TARGETS_DN	0.0157895	0.0607312	0.42621	1.56698	5	34
GO_EPITHELIAL_CELL_MORPHOGENESIS	0.0364964	0.107848	0.518667	1.56637	14	16
GSE22886_NAIVE_CD4_TCELL_VS_12H_ACT_TH2_UP	0.00357143	0.0271266	0.315472	1.56626	0	152
BOQUEST_STEM_CELL_DN	0.00645161	0.036174	0.325979	1.56548	1	109
GO_RESPONSE_TO_HORMONE	0.00578035	0.0333784	0.275929	1.56534	0	484
GO_POSITIVE_REGULATION_OF_DENDRITIC_SPINE_DEVELOPMENT	0.028777	0.0911772	0.482018	1.56522	11	20
REACTOME_AMINO_ACID_TRANSPORT_ACROSS_THE_PLASMA_MEMBRANE	0.0366748	0.108255	0.509664	1.56514	14	17
GSE18281_SUBCAPSULAR_VS_PERIMEDULLARY_CORTICAL_REGION_OF_THYMUS_UP	0.00369004	0.0271266	0.31955	1.56511	0	139
HOWLIN_CITED1_TARGETS_1_UP	0.0366748	0.108255	0.509652	1.5651	14	17
GO_REGULATION_OF_EPITHELIAL_CELL_MIGRATION	0.00607903	0.0345939	0.347505	1.56508	1	79
DELACROIX_RAR_BOUND_ES	0.004329	0.0294165	0.29169	1.56483	0	285
ESC_V6.5_UP_EARLY.V1_UP	0.00970874	0.0459913	0.33531	1.56472	2	98
CCAGGTT,MIR-490	0.0140056	0.0574816	0.386494	1.56461	4	47
LE_EGR2_TARGETS_DN	0.0197183	0.0700931	0.371368	1.56456	6	56
KEGG_BASAL_CELL_CARCINOMA	0.0203562	0.0714557	0.440702	1.56442	7	29
GO_PROTEIN_TYROSINE_KINASE_ACTIVITY	0.010101	0.0467351	0.342084	1.5644	2	90
HOSHIDA_LIVER_CANCER_SURVIVAL_UP	0.0197183	0.0700931	0.38958	1.56405	6	46
GO_PATTERN_SPECIFICATION_PROCESS	0.00392157	0.0274881	0.309025	1.56396	0	186
HEIDENBLAD_AMPLICON_12P11_12_DN	0.0310263	0.0960453	0.491895	1.56393	12	19
GO_REGULATION_OF_DEFENSE_RESPONSE_TO_VIRUS_BY_VIRUS	0.0199501	0.0705313	0.454196	1.56357	7	26
GSE37605_FOXP3_FUSION_GFP_VS_IRES_GFP_TREG_C57BL6_DN	0.0100334	0.0466328	0.34107	1.56346	2	92
GSE27291_0H_VS_7D_STIM_GAMMADELTA_TCELL_DN	0.00353357	0.0271266	0.313819	1.56346	0	153
GCM_MLL	0.00358423	0.0271266	0.313152	1.56338	0	158
TGTATGA,MIR-485-3P	0.012945	0.0546804	0.328606	1.56335	3	104
GO_EPITHELIAL_TO_MESENCHYMAL_TRANSITION	0.0223881	0.0762017	0.467235	1.56318	8	24
GO_PROTEIN_KINASE_A_BINDING	0.0222222	0.0758113	0.432583	1.56297	8	30
V$SP3_Q3	0.00357143	0.0271266	0.315577	1.56296	0	149
GO_MACROPHAGE_ACTIVATION	0.0390244	0.113384	0.529024	1.56256	15	15
DELYS_THYROID_CANCER_DN	0.00958466	0.0459066	0.332661	1.56246	2	99
REACTOME_CELL_JUNCTION_ORGANIZATION	0.020202	0.0711391	0.463441	1.56242	7	25
GSE42021_CD24HI_VS_CD24LOW_TCONV_THYMUS_UP	0.00352113	0.0271266	0.319227	1.56239	0	133
GO_NEURON_PROJECTION_TERMINUS	0.0141243	0.0574816	0.381632	1.56224	4	51
GSE9988_LPS_VS_CTRL_TREATED_MONOCYTE_DN	0.00371747	0.0271266	0.307649	1.56213	0	178
chr11p11	0.0222222	0.0758113	0.432324	1.56204	8	30
MODULE_104	0.00647249	0.0361959	0.321444	1.56179	1	116
GO_MITOGEN_ACTIVATED_PROTEIN_KINASE_BINDING	0.0391198	0.113637	0.508562	1.56176	15	17
GO_TRANSCRIPTION_FACTOR_ACTIVITY_DIRECT_LIGAND_REGULATED_SEQUENCE_SPECIFIC_DNA_BINDING	0.028777	0.0911772	0.480874	1.56151	11	20
V$EGR1_01	0.00383142	0.0272718	0.305978	1.56149	0	193
REACTOME_DOWNREGULATION_OF_SMAD2_3_SMAD4_TRANSCRIPTIONAL_ACTIVITY	0.0385542	0.112508	0.49943	1.56149	15	18
GO_EYE_MORPHOGENESIS	0.017094	0.0640497	0.386163	1.56133	5	49
GSE17974_CTRL_VS_ACT_IL4_AND_ANTI_IL12_6H_CD4_TCELL_UP	0.00355872	0.0271266	0.319308	1.56129	0	135
GO_STRIATED_MUSCLE_CONTRACTION	0.0108696	0.0484427	0.394672	1.56118	3	43
GRESHOCK_CANCER_COPY_NUMBER_UP	0.00888889	0.0433207	0.298431	1.56102	1	241
GSE17974_0H_VS_4H_IN_VITRO_ACT_CD4_TCELL_UP	0.00352113	0.0271266	0.318891	1.56074	0	133
CCATCCA,MIR-432	0.0137741	0.0571308	0.412359	1.56048	4	37
GO_AXON_ENSHEATHMENT	0.0108696	0.0484427	0.394452	1.5603	3	43
GO_ENSHEATHMENT_OF_NEURONS	0.0108696	0.0484427	0.394452	1.5603	3	43
MCBRYAN_PUBERTAL_BREAST_4_5WK_DN	0.00660066	0.036564	0.322358	1.56005	1	114
GSE33424_CD161_INT_VS_NEG_CD8_TCELL_DN	0.00714286	0.0380505	0.314355	1.55991	1	144
GO_REGULATION_OF_CELL_SUBSTRATE_ADHESION	0.00986842	0.0462526	0.336209	1.55979	2	96
GO_GLAND_MORPHOGENESIS	0.0136986	0.056995	0.39982	1.55965	4	41
GSE21360_NAIVE_VS_PRIMARY_MEMORY_CD8_TCELL_UP	0.00980392	0.0462101	0.330815	1.55961	2	102
GO_POSITIVE_REGULATION_OF_SYNAPTIC_TRANSMISSION	0.00835655	0.0419368	0.408289	1.55938	2	39
BENPORATH_SUZ12_TARGETS	0.00444444	0.0297165	0.293207	1.55923	0	274
REACTOME_METABOLISM_OF_LIPIDS_AND_LIPOPROTEINS	0.00452489	0.0299095	0.288079	1.55922	0	314
V$ATF6_01	0.00923077	0.0444349	0.347417	1.55912	2	77
GO_HORMONE_RECEPTOR_BINDING	0.00967742	0.0459913	0.324586	1.55879	2	109
GSE22103_UNSTIM_VS_GMCSF_AND_IFNG_STIM_NEUTROPHIL_UP	0.00357143	0.0271266	0.309102	1.55868	0	167
GSE36476_YOUNG_VS_OLD_DONOR_MEMORY_CD4_TCELL_DN	0.00854701	0.0424139	0.358681	1.5582	2	67
GSE26023_PHD3_KO_VS_WT_NEUTROPHIL_HYPOXIA_UP	0.00664452	0.0366851	0.323396	1.55818	1	112
GO_VITAMIN_TRANSPORT	0.0414634	0.118789	0.527514	1.5581	16	15
GO_POSITIVE_REGULATION_OF_PROTEIN_IMPORT	0.0113314	0.0496062	0.364169	1.55793	3	62
LIM_MAMMARY_STEM_CELL_UP	0.00383142	0.0272718	0.307324	1.55748	0	182
PID_HEDGEHOG_GLI_PATHWAY	0.0136986	0.056995	0.399262	1.55747	4	41
BIOCARTA_IL2RB_PATHWAY	0.0184211	0.0670995	0.423615	1.55744	6	34
GSE7460_CD8_TCELL_VS_TREG_ACT_UP	0.00343643	0.0271266	0.317704	1.55729	0	131
V$NKX25_02	0.0035461	0.0271266	0.319686	1.55727	0	129
GSE21927_EL4_VS_MCA203_TUMOR_MONOCYTES_UP	0.00606061	0.0345628	0.349724	1.5566	1	74
GSE22033_UNTREATED_VS_MRL24_TREATED_MEF_DN	0.00359712	0.0271266	0.319209	1.55628	0	134
WWTAAGGC_UNKNOWN	0.00923077	0.0444349	0.346202	1.55585	2	78
GO_RESPONSE_TO_CORTICOSTEROID	0.00584795	0.0335653	0.351548	1.55575	1	71
GO_REGULATION_OF_EPITHELIAL_CELL_DIFFERENTIATION	0.017094	0.0640497	0.384767	1.55569	5	49
GSE10147_IL3_AND_HIVP17_VS_IL3_AND_CPG_STIM_PDC_DN	0.00660066	0.036564	0.321399	1.55541	1	114
ZHONG_RESPONSE_TO_AZACITIDINE_AND_TSA_UP	0.00346021	0.0271266	0.318045	1.55538	0	127
PETRETTO_HEART_MASS_QTL_CIS_UP	0.028777	0.0911772	0.478957	1.55529	11	20
GSE3565_CTRL_VS_LPS_INJECTED_DUSP1_KO_SPLENOCYTES_DN	0.00371747	0.0271266	0.314964	1.55506	0	142
PID_CDC42_PATHWAY	0.0197183	0.0700931	0.36636	1.555	6	59
GSE19198_CTRL_VS_IL21_TREATED_TCELL_24H_DN	0.00367647	0.0271266	0.316162	1.55469	0	141
GO_CELL_ADHESION_MOLECULE_BINDING	0.00914634	0.044172	0.348658	1.5542	2	76
GSE29618_PRE_VS_DAY7_POST_TIV_FLU_VACCINE_MONOCYTE_UP	0.012945	0.0546804	0.327144	1.55418	3	103
AAANWWTGC_UNKNOWN	0.012945	0.0546804	0.327107	1.55401	3	103
GSE24142_DN2_VS_DN3_THYMOCYTE_DN	0.00359712	0.0271266	0.316809	1.55293	0	138
V$LXR_DR4_Q3	0.0196078	0.0700453	0.368401	1.55289	6	58
ALK_DN.V1_DN	0.0140056	0.0574816	0.392762	1.55287	4	44
GO_CELL_GROWTH	0.00607903	0.0345939	0.35062	1.55286	1	73
TTTTGAG,MIR-373	0.00358423	0.0271266	0.311093	1.55253	0	157
GSE17974_CTRL_VS_ACT_IL4_AND_ANTI_IL12_24H_CD4_TCELL_UP	0.00369004	0.0271266	0.316867	1.55197	0	139
GO_INTRINSIC_APOPTOTIC_SIGNALING_PATHWAY_IN_RESPONSE_TO_DNA_DAMAGE_BY_P53_CLASS_MEDIATOR	0.0199501	0.0705313	0.450818	1.55195	7	26
AATGGAG,MIR-136	0.0169972	0.0637944	0.376903	1.55169	5	52
BIOCARTA_KERATINOCYTE_PATHWAY	0.0163934	0.0621404	0.411949	1.55129	5	36
GSE33162_UNTREATED_VS_4H_LPS_STIM_HDAC3_HET_MACROPHAGE_UP	0.00714286	0.0380505	0.312594	1.55117	1	144
ACTTTAT,MIR-142-5P	0.008	0.040792	0.304515	1.55082	1	197
GO_SINGLE_ORGANISM_CELL_ADHESION	0.00840336	0.0420452	0.299291	1.55078	1	220
BROWNE_HCMV_INFECTION_18HR_DN	0.00996678	0.0464849	0.334857	1.55075	2	95
GO_PEPTIDYL_THREONINE_MODIFICATION	0.0139276	0.0572864	0.406029	1.55074	4	39
KEGG_LONG_TERM_POTENTIATION	0.0197183	0.0700931	0.386247	1.55068	6	46
GGCAGTG,MIR-324-3P	0.00607903	0.0345939	0.350074	1.55044	1	73
GO_POSITIVE_REGULATION_OF_MULTICELLULAR_ORGANISM_GROWTH	0.0439024	0.123678	0.524918	1.55044	17	15
GSE22886_NAIVE_VS_IGG_IGA_MEMORY_BCELL_UP	0.00346021	0.0271266	0.316963	1.55009	0	127
RODRIGUES_THYROID_CARCINOMA_ANAPLASTIC_DN	0.0049505	0.0312368	0.284523	1.55005	0	340
GSE43863_DAY6_EFF_VS_DAY150_MEM_TH1_CD4_TCELL_DN	0.00367647	0.0271266	0.31645	1.54996	0	140
V$HNF4ALPHA_Q6	0.00355872	0.0271266	0.31245	1.54996	0	147
GO_CEREBRAL_CORTEX_RADIALLY_ORIENTED_CELL_MIGRATION	0.0389294	0.113256	0.513203	1.54987	15	16
GSE10325_CD4_TCELL_VS_BCELL_UP	0.00347222	0.0271266	0.315629	1.54979	0	132
REACTOME_SIGNALLING_BY_NGF	0.00378788	0.027195	0.30929	1.54937	0	169
PID_TXA2PATHWAY	0.0210526	0.0732067	0.421386	1.54924	7	34
GSE32901_NAIVE_VS_TH1_CD4_TCELL_UP	0.0115607	0.0503948	0.358859	1.54914	3	65
GSE6259_DEC205_POS_DC_VS_CD4_TCELL_DN	0.00714286	0.0380505	0.312158	1.54893	1	148
REACTOME_CELL_SURFACE_INTERACTIONS_AT_THE_VASCULAR_WALL	0.0163043	0.0621027	0.391473	1.54852	5	43
GSE1460_DP_THYMOCYTE_VS_NAIVE_CD4_TCELL_CORD_BLOOD_DN	0.0096463	0.0459913	0.324607	1.54839	2	106
RICKMAN_TUMOR_DIFFERENTIATED_WELL_VS_MODERATELY_UP	0.00611621	0.0346871	0.341677	1.54782	1	80
V$USF_Q6_01	0.00361011	0.0271266	0.308284	1.54756	0	165
GO_PHOSPHATIDYLINOSITOL_BIOSYNTHETIC_PROCESS	0.0100671	0.0467351	0.33819	1.5475	2	91
GSE22611_UNSTIM_VS_2H_MDP_STIM_MUTANT_NOD2_TRANSDUCED_HEK293T_CELL_DN	0.00371747	0.0271266	0.304749	1.54741	0	178
GO_MUSCLE_STRUCTURE_DEVELOPMENT	0.00809717	0.041099	0.299916	1.54701	1	208
GO_VIRUS_RECEPTOR_ACTIVITY	0.0210526	0.0732067	0.420772	1.54698	7	34
GO_LATERAL_PLASMA_MEMBRANE	0.0227273	0.0771397	0.458845	1.54692	8	25
GSE1566_WT_VS_EZH2_KO_LN_TCELL_DN	0.00664452	0.0366851	0.321024	1.54675	1	112
GSE7852_THYMUS_VS_FAT_TREG_DN	0.00347222	0.0271266	0.314995	1.54668	0	132
GSE21379_WT_VS_SAP_KO_TFH_CD4_TCELL_DN	0.00660066	0.036564	0.319556	1.54649	1	114
GSE10422_WT_VS_BAFF_TRANSGENIC_LN_BCELL_UP	0.00361011	0.0271266	0.31187	1.54642	0	143
GSE5589_WT_VS_IL10_KO_LPS_STIM_MACROPHAGE_45MIN_DN	0.00714286	0.0380505	0.3116	1.54624	1	144
GSE37301_CD4_TCELL_VS_RAG2_KO_NK_CELL_DN	0.00355872	0.0271266	0.311656	1.54602	0	147
GO_LACTATION	0.0275689	0.0886552	0.443585	1.54595	10	27
V$HEN1_02	0.00662252	0.0366395	0.319173	1.54587	1	115
KRAS.KIDNEY_UP.V1_UP	0.0138504	0.0571626	0.40097	1.54587	4	40
GO_SYNAPTIC_MEMBRANE	0.00626959	0.0353317	0.340123	1.54556	1	82
GTGACTT,MIR-224	0.00649351	0.0361959	0.321294	1.54537	1	110
HAN_SATB1_TARGETS_UP	0.00869565	0.0427539	0.297371	1.54535	1	230
ATACTGT,MIR-144	0.00359712	0.0271266	0.316872	1.54489	0	134
GSE39820_IL1B_IL6_VS_IL1B_IL6_IL23A_TREATED_CD4_TCELL_DN	0.00961538	0.0459877	0.32821	1.54477	2	101
GSE21927_SPLEEN_VS_4T1_TUMOR_MONOCYTE_BALBC_UP	0.00660066	0.036564	0.319137	1.54446	1	114
GO_NEGATIVE_REGULATION_OF_PHOSPHATE_METABOLIC_PROCESS	0.0046729	0.0305998	0.284143	1.54439	0	327
GO_NEGATIVE_REGULATION_OF_PHOSPHORUS_METABOLIC_PROCESS	0.0046729	0.0305998	0.284143	1.54439	0	327
CHIARADONNA_NEOPLASTIC_TRANSFORMATION_KRAS_DN	0.00617284	0.0348896	0.3392	1.54429	1	81
GSE19941_IL10_KO_VS_IL10_KO_AND_NFKBP50_KO_UNSTIM_MACROPHAGE_DN	0.00983607	0.0462526	0.320913	1.54408	2	111
MARTENS_BOUND_BY_PML_RARA_FUSION	0.00465116	0.0305174	0.283075	1.54396	0	335
V$SRF_Q6	0.00352113	0.0271266	0.315391	1.54361	0	133
GO_POSITIVE_REGULATION_OF_GROWTH	0.00343643	0.0271266	0.314882	1.54346	0	131
BENPORATH_ES_CORE_NINE_CORRELATED	0.00621118	0.0350469	0.33941	1.54344	1	83
GO_LUNG_MORPHOGENESIS	0.0298507	0.0934693	0.46128	1.54326	11	24
GO_REGULATION_OF_ERYTHROCYTE_DIFFERENTIATION	0.0229592	0.0777	0.442286	1.5431	8	28
GSE5542_UNTREATED_VS_IFNA_AND_IFNG_TREATED_EPITHELIAL_CELLS_24H_DN	0.00369004	0.0271266	0.315056	1.5431	0	139
REACTOME_GPVI_MEDIATED_ACTIVATION_CASCADE	0.0298507	0.0934693	0.46119	1.54296	11	24
GSE32255_WT_UNSTIM_VS_JMJD2D_KNOCKDOWN_4H_LPS_STIM_DC_UP	0.00714286	0.0380505	0.310907	1.5428	1	144
GO_PLASMA_MEMBRANE_RECEPTOR_COMPLEX	0.00892857	0.0434348	0.347907	1.54262	2	72
GSE40225_WT_VS_RIP_B7X_DIABETIC_MOUSE_PANCREATIC_CD8_TCELL_UP	0.00358423	0.0271266	0.308984	1.54257	0	158
CHARAFE_BREAST_CANCER_BASAL_VS_MESENCHYMAL_DN	0.0298507	0.0934693	0.461025	1.54241	11	24
AAAGGAT,MIR-501	0.00983607	0.0462526	0.338016	1.54228	2	88
SIG_INSULIN_RECEPTOR_PATHWAY_IN_CARDIAC_MYOCYTES	0.0215054	0.0742776	0.390619	1.54225	7	42
V$POU3F2_02	0.00328947	0.0271266	0.315542	1.54225	0	122
AGTTCTC,MIR-146A,MIR-146B	0.0163934	0.0621404	0.409404	1.54171	5	36
GO_REGULATION_OF_NUCLEOTIDE_METABOLIC_PROCESS	0.00617284	0.0348896	0.33863	1.5417	1	81
KAAB_FAILED_HEART_ATRIUM_UP	0.031941	0.0979467	0.473934	1.54111	12	21
GO_RESPONSE_TO_LIPID	0.00529101	0.0320221	0.275069	1.54073	0	428
V$AREB6_03	0.00355872	0.0271266	0.314758	1.54053	0	136
VERHAAK_GLIOBLASTOMA_PRONEURAL	0.0128617	0.0545163	0.322929	1.54038	3	106
GO_NEGATIVE_REGULATION_OF_CELLULAR_RESPONSE_TO_GROWTH_FACTOR_STIMULUS	0.0196078	0.0700453	0.365421	1.54033	6	58
V$NFKAPPAB_01	0.00367647	0.0271266	0.31447	1.54026	0	140
GO_REGULATION_OF_REGULATED_SECRETORY_PATHWAY	0.019943	0.0705313	0.368621	1.54023	6	54
GSE33425_CD161_HIGH_VS_NEG_CD8_TCELL_UP	0.00358423	0.0271266	0.308575	1.5402	0	155
V$OCT_C	0.00337838	0.0271266	0.314852	1.53996	0	124
GO_HETEROTRIMERIC_G_PROTEIN_COMPLEX	0.0440098	0.123954	0.501458	1.53994	17	17
GO_RNA_POLYMERASE_II_TRANSCRIPTION_COFACTOR_ACTIVITY	0.00854701	0.0424139	0.354218	1.53881	2	67
GSE40666_UNTREATED_VS_IFNA_STIM_STAT1_KO_CD8_TCELL_90MIN_DN	0.0037037	0.0271266	0.30859	1.5388	0	160
BIOCARTA_IL7_PATHWAY	0.0437956	0.123429	0.509471	1.5386	17	16
GO_REGULATION_OF_STRESS_ACTIVATED_PROTEIN_KINASE_SIGNALING_CASCADE	0.0035461	0.0271266	0.315685	1.53778	0	129
GO_RESPONSE_TO_GROWTH_FACTOR	0.00892857	0.0434348	0.29259	1.53765	1	251
MODULE_277	0.01983	0.0703304	0.373451	1.53748	6	52
BIOCARTA_BCR_PATHWAY	0.0210526	0.0732067	0.418184	1.53747	7	34
GO_CLATHRIN_BINDING	0.0199501	0.0705313	0.446556	1.53727	7	26
V$NKX61_01	0.0162338	0.0618515	0.323016	1.53699	4	105
V$MAZ_Q6	0.00353357	0.0271266	0.315585	1.53695	0	128
GSE14000_UNSTIM_VS_4H_LPS_DC_UP	0.0037037	0.0271266	0.30412	1.53664	0	174
GO_ACTIN_FILAMENT_POLYMERIZATION	0.0463415	0.128353	0.520153	1.53636	18	15
BOYLAN_MULTIPLE_MYELOMA_C_UP	0.0210526	0.0732067	0.417841	1.53621	7	34
V$AP1_Q2	0.00367647	0.0271266	0.31361	1.53605	0	140
BYSTROEM_CORRELATED_WITH_IL5_DN	0.0253521	0.0832321	0.361891	1.53604	8	59
GSE9037_CTRL_VS_LPS_4H_STIM_IRAK4_KO_BMDM_UP	0.00711744	0.0380505	0.31403	1.53548	1	135
LINDSTEDT_DENDRITIC_CELL_MATURATION_C	0.022792	0.0773005	0.379726	1.5353	7	49
V$ZF5_01	0.00362319	0.0271266	0.30695	1.53521	0	161
GSE19401_PAM2CSK4_VS_RETINOIC_ACID_STIM_FOLLICULAR_DC_DN	0.00649351	0.0361959	0.314655	1.53511	1	117
MODULE_180	0.0168067	0.0632933	0.379189	1.53504	5	47
GSE40666_WT_VS_STAT1_KO_CD8_TCELL_DN	0.0035461	0.0271266	0.312537	1.53482	0	137
V$SRF_Q4	0.00342466	0.0271266	0.313852	1.53472	0	126
GO_EXTRINSIC_COMPONENT_OF_ORGANELLE_MEMBRANE	0.0311751	0.0963048	0.472567	1.53454	12	20
GTAAGAT,MIR-200A	0.0196078	0.0700453	0.403934	1.53411	6	38
PEDERSEN_TARGETS_OF_611CTF_ISOFORM_OF_ERBB2	0.0167131	0.0629763	0.401667	1.53408	5	39
V$PR_01	0.00909091	0.043968	0.344566	1.53364	2	74
GO_REGULATION_OF_CYTOPLASMIC_TRANSPORT	0.0045045	0.029834	0.281817	1.53358	0	323
KEGG_MAPK_SIGNALING_PATHWAY	0.00367647	0.0271266	0.308687	1.53354	0	156
GSE14415_INDUCED_TREG_VS_FOXP3_KO_INDUCED_TREG_IL2_CULTURE_DN	0.00892857	0.0434348	0.345845	1.53348	2	72
GO_ENDOCYTIC_RECYCLING	0.0409639	0.11756	0.490448	1.53341	16	18
GO_REGULATION_OF_SYSTEMIC_ARTERIAL_BLOOD_PRESSURE	0.0271605	0.08768	0.424387	1.53336	10	30
GSE31082_DN_VS_CD4_SP_THYMOCYTE_DN	0.0037037	0.0271266	0.307453	1.53313	0	160
GSE9946_IMMATURE_VS_PROSTAGLANDINE2_TREATED_MATURE_DC_UP	0.00923077	0.0444349	0.341548	1.53278	2	77
GSE20727_H2O2_VS_ROS_INHIBITOR_TREATED_DC_DN	0.00367647	0.0271266	0.308464	1.53243	0	156
MODULE_239	0.0128617	0.0545163	0.32124	1.53232	3	106
GO_PROTEIN_N_LINKED_GLYCOSYLATION	0.0227273	0.0771397	0.360213	1.53229	7	60
GSE23114_WT_VS_SLE2C1_MOUSE_SPLEEN_B1A_BCELL_DN	0.00359712	0.0271266	0.314243	1.53208	0	134
GGATTA_V$PITX2_Q2	0.00436681	0.0294633	0.287254	1.53196	0	277
GSE5589_WT_VS_IL6_KO_LPS_AND_IL10_STIM_MACROPHAGE_180MIN_DN	0.00986842	0.0462526	0.329741	1.53181	2	97
GSE22886_NAIVE_TCELL_VS_MONOCYTE_UP	0.00714286	0.0380505	0.309232	1.53153	1	149
GSE29618_BCELL_VS_MDC_DAY7_FLU_VACCINE_DN	0.0035461	0.0271266	0.311857	1.53148	0	137
GSE22313_HEALTHY_VS_SLE_MOUSE_CD4_TCELL_UP	0.012945	0.0546804	0.322299	1.53116	3	103
YAO_TEMPORAL_RESPONSE_TO_PROGESTERONE_CLUSTER_1	0.0166205	0.0627159	0.39708	1.53087	5	40
MORF_ESR1	0.0101695	0.0469218	0.332283	1.53081	2	94
GO_CELLULAR_RESPONSE_TO_OXYGEN_CONTAINING_COMPOUND	0.00537634	0.0324796	0.271392	1.53076	0	448
GSE36009_WT_VS_NLRP10_KO_DC_DN	0.0070922	0.0380505	0.30381	1.53074	1	166
BREUHAHN_GROWTH_FACTOR_SIGNALING_IN_LIVER_CANCER	0.0463415	0.128353	0.518215	1.53064	18	15
GO_POSITIVE_REGULATION_OF_LIPID_METABOLIC_PROCESS	0.0253521	0.0832321	0.360589	1.53051	8	59
REACTOME_FATTY_ACID_TRIACYLGLYCEROL_AND_KETONE_BODY_METABOLISM	0.0070922	0.0380505	0.313663	1.53049	1	130
GSE18893_TCONV_VS_TREG_2H_TNF_STIM_DN	0.00353357	0.0271266	0.307036	1.52966	0	153
AGGGCCA,MIR-328	0.0253521	0.0832321	0.360383	1.52964	8	59
GO_REGULATION_OF_TRANSMEMBRANE_RECEPTOR_PROTEIN_SERINE_THREONINE_KINASE_SIGNALING_PATHWAY	0.00986842	0.0462526	0.329684	1.52952	2	96
GO_PHOSPHATIDYLINOSITOL_3_KINASE_ACTIVITY	0.0271605	0.08768	0.423305	1.52945	10	30
V$FAC1_01	0.00347222	0.0271266	0.311466	1.52935	0	132
AMUNDSON_POOR_SURVIVAL_AFTER_GAMMA_RADIATION_2G	0.0070922	0.0380505	0.313901	1.52909	1	129
ACACTCC,MIR-122A	0.0247934	0.0822429	0.372587	1.52855	8	50
GO_ACTIVATION_OF_PROTEIN_KINASE_ACTIVITY	0.00364964	0.0271266	0.306479	1.52851	0	159
MORF_PML	0.00996678	0.0464849	0.330039	1.52843	2	95
GO_REGULATION_OF_LAMELLIPODIUM_ASSEMBLY	0.0433735	0.12255	0.488856	1.52843	17	18
GO_INTEGRIN_BINDING	0.0191781	0.0692756	0.391757	1.52819	6	41
GO_REGULATION_OF_STEM_CELL_DIFFERENTIATION	0.0196629	0.0700931	0.362988	1.52797	6	55
BIOCARTA_TGFB_PATHWAY	0.0487805	0.133419	0.517267	1.52784	19	15
GSE42088_UNINF_VS_LEISHMANIA_INF_DC_4H_UP	0.00714286	0.0380505	0.308435	1.52758	1	149
GSE15330_WT_VS_IKAROS_KO_MEGAKARYOCYTE_ERYTHROID_PROGENITOR_DN	0.00369004	0.0271266	0.311851	1.5274	0	139
GSE29618_MONOCYTE_VS_MDC_UP	0.00660066	0.036564	0.315523	1.52697	1	114
GSE23925_LIGHT_ZONE_VS_DARK_ZONE_BCELL_UP	0.0128617	0.0545163	0.3201	1.52689	3	106
GSE16385_MONOCYTE_VS_12H_IL4_TREATED_MACROPHAGE_DN	0.0070922	0.0380505	0.302993	1.52663	1	166
GSE45739_UNSTIM_VS_ACD3_ACD28_STIM_NRAS_KO_CD4_TCELL_DN	0.00967742	0.0459913	0.317856	1.52647	2	109
GSE5542_UNTREATED_VS_IFNG_TREATED_EPITHELIAL_CELLS_6H_DN	0.00364964	0.0271266	0.306027	1.52626	0	159
GO_SEX_DIFFERENTIATION	0.00324675	0.0271266	0.312382	1.52611	0	121
V$CEBP_01	0.0035461	0.0271266	0.310717	1.52588	0	137
GO_DYNEIN_BINDING	0.0334129	0.101179	0.479799	1.52548	13	19
GSE13522_CTRL_VS_T_CRUZI_Y_STRAIN_INF_SKIN_IFNAR_KO_DN	0.00328947	0.0271266	0.313081	1.52528	0	120
SHEDDEN_LUNG_CANCER_GOOD_SURVIVAL_A5	0.0196078	0.0700453	0.37668	1.52488	6	47
REACTOME_MYOGENESIS	0.0487805	0.133419	0.516124	1.52446	19	15
GSE16266_CTRL_VS_LPS_STIM_MEF_DN	0.0162338	0.0618515	0.320367	1.52438	4	105
GSE17721_LPS_VS_PAM3CSK4_16H_BMDC_DN	0.00357143	0.0271266	0.307031	1.52435	0	152
GSE25677_R848_VS_MPL_AND_R848_STIM_BCELL_UP	0.00909091	0.043968	0.342462	1.52428	2	74
GO_NEGATIVE_REGULATION_OF_LOCOMOTION	0.0070922	0.0380505	0.312385	1.52426	1	130
GO_SOMATODENDRITIC_COMPARTMENT	0.0045045	0.029834	0.280071	1.52408	0	323
GO_METAL_ION_TRANSMEMBRANE_TRANSPORTER_ACTIVITY	0.00359712	0.0271266	0.312551	1.52383	0	134
V$SP1_01	0.00367647	0.0271266	0.306637	1.52335	0	156
PID_CMYB_PATHWAY	0.0227273	0.0771397	0.358092	1.52326	7	60
ALFANO_MYC_TARGETS	0.0037594	0.027195	0.301784	1.52311	0	175
PEDERSEN_METASTASIS_BY_ERBB2_ISOFORM_1	0.036855	0.108715	0.468322	1.52286	14	21
GO_INACTIVATION_OF_MAPK_ACTIVITY	0.0335731	0.101549	0.468964	1.52284	13	20
GSE40277_EOS_AND_LEF1_TRANSDUCED_VS_GATA1_AND_SATB1_TRANSDUCED_CD4_TCELL_UP	0.00714286	0.0380505	0.306879	1.52281	1	144
V$PITX2_Q2	0.0070922	0.0380505	0.312587	1.52269	1	129
V$TCF4_Q5	0.012945	0.0546804	0.320502	1.52263	3	103
SESTO_RESPONSE_TO_UV_C8	0.022792	0.0773005	0.364381	1.52252	7	54
GO_SUBSTRATE_ADHESION_DEPENDENT_CELL_SPREADING	0.0357995	0.10642	0.478743	1.52212	14	19
GO_PHOSPHATIDYLINOSITOL_METABOLIC_PROCESS	0.00328947	0.0271266	0.311393	1.52197	0	122
FAELT_B_CLL_WITH_VH3_21_UP	0.0191781	0.0692756	0.390103	1.52174	6	41
V$HLF_01	0.00364964	0.0271266	0.3051	1.52163	0	159
GO_REGULATION_OF_ADHERENS_JUNCTION_ORGANIZATION	0.0230179	0.0777	0.417844	1.52135	8	32
PID_REG_GR_PATHWAY	0.0226629	0.07698	0.369519	1.52129	7	52
GSE3720_UNSTIM_VS_PMA_STIM_VD1_GAMMADELTA_TCELL_DN	0.0247934	0.0822429	0.370808	1.52125	8	50
RNGTGGGC_UNKNOWN	0.00529101	0.0320221	0.270878	1.52092	0	433
YAO_TEMPORAL_RESPONSE_TO_PROGESTERONE_CLUSTER_16	0.0234987	0.0789632	0.41554	1.52048	8	33
GO_EPITHELIAL_CELL_DIFFERENTIATION	0.00816327	0.0413715	0.292494	1.52042	1	215
GO_CIRCADIAN_RHYTHM	0.012012	0.0521576	0.340605	1.52023	3	75
REACTOME_GABA_B_RECEPTOR_ACTIVATION	0.0464548	0.128534	0.494923	1.51987	18	17
ST_G_ALPHA_I_PATHWAY	0.0323383	0.0987547	0.454221	1.51964	12	24
CCAGGGG,MIR-331	0.0253521	0.0832321	0.360617	1.51927	8	56
GO_CARDIAC_VENTRICLE_MORPHOGENESIS	0.0335731	0.101549	0.467858	1.51924	13	20
GO_NEGATIVE_REGULATION_OF_PHOSPHORYLATION	0.00452489	0.0299095	0.286632	1.51924	0	269
GO_REGULATION_OF_SYSTEM_PROCESS	0.00378788	0.027195	0.30034	1.51913	0	179
PID_INTEGRIN_A4B1_PATHWAY	0.0364078	0.107678	0.45799	1.51875	14	22
TONKS_TARGETS_OF_RUNX1_RUNX1T1_FUSION_MONOCYTE_DN	0.0230179	0.0777	0.417117	1.5187	8	32
LIAO_METASTASIS	0.00510204	0.0316393	0.275194	1.51818	0	387
REACTOME_SIGNALING_BY_SCF_KIT	0.017341	0.0647389	0.351681	1.51815	5	65
GSE19941_LPS_VS_LPS_AND_IL10_STIM_IL10_KO_NFKBP50_KO_MACROPHAGE_UP	0.00660066	0.036564	0.313692	1.51811	1	114
GSE43863_TH1_VS_TFH_EFFECTOR_CD4_TCELL_UP	0.00996678	0.0464849	0.327809	1.5181	2	95
GSE20366_CD103_KLRG1_DP_VS_DN_TREG_UP	0.00342466	0.0271266	0.310453	1.5181	0	126
MARTIN_INTERACT_WITH_HDAC	0.0245902	0.0817976	0.40304	1.51774	8	36
GO_COATED_PIT	0.028169	0.0900855	0.378029	1.51768	9	46
GO_LIPID_BINDING	0.00507614	0.0316257	0.277937	1.51767	0	347
GUTIERREZ_CHRONIC_LYMPHOCYTIC_LEUKEMIA_DN	0.0250696	0.0826301	0.397367	1.51766	8	39
GSE22886_TH1_VS_TH2_12H_ACT_DN	0.0128205	0.054428	0.322433	1.51758	3	101
MORF_IKBKG	0.00680272	0.0373883	0.315853	1.51756	1	113
GO_REGULATION_OF_ORGANIC_ACID_TRANSPORT	0.0364078	0.107678	0.457588	1.51742	14	22
DARWICHE_PAPILLOMA_PROGRESSION_RISK	0.0245902	0.0817976	0.402953	1.51741	8	36
GO_SOMITOGENESIS	0.0230179	0.0777	0.416745	1.51735	8	32
GO_14_3_3_PROTEIN_BINDING	0.0487805	0.133419	0.513706	1.51732	19	15
GSE21670_STAT3_KO_VS_WT_CD4_TCELL_IL6_TREATED_DN	0.00974026	0.0459913	0.315438	1.5172	2	110
V$NF1_Q6	0.00711744	0.0380505	0.309964	1.51707	1	136
GO_RETINA_DEVELOPMENT_IN_CAMERA_TYPE_EYE	0.0247934	0.0822429	0.369752	1.51692	8	50
WAMUNYOKOLI_OVARIAN_CANCER_LMP_DN	0.00649351	0.0361959	0.310856	1.51658	1	117
GO_POSITIVE_REGULATION_OF_STEM_CELL_DIFFERENTIATION	0.0364078	0.107678	0.4573	1.51646	14	22
BONCI_TARGETS_OF_MIR15A_AND_MIR16_1	0.0284091	0.0906143	0.356491	1.51645	9	60
REACTOME_PYRUVATE_METABOLISM	0.0487805	0.133419	0.513402	1.51642	19	15
BOYAULT_LIVER_CANCER_SUBCLASS_G12_UP	0.0283505	0.0905074	0.421224	1.51627	10	31
GSE22886_NAIVE_VS_MEMORY_TCELL_UP	0.0070922	0.0380505	0.31073	1.51618	1	130
GSE14308_TH1_VS_NAIVE_CD4_TCELL_DN	0.00711744	0.0380505	0.310049	1.51602	1	135
GO_PROTEIN_AUTOPHOSPHORYLATION	0.0070922	0.0380505	0.310674	1.51591	1	130
ZHAN_MULTIPLE_MYELOMA_CD1_DN	0.0247934	0.0822429	0.400538	1.51575	8	37
V$LBP1_Q6	0.00328947	0.0271266	0.310114	1.51572	0	122
GSE46606_IRF4_KO_VS_WT_CD40L_IL2_IL5_3DAY_STIMULATED_BCELL_UP	0.0033557	0.0271266	0.309496	1.5157	0	125
GSE30083_SP1_VS_SP4_THYMOCYTE_UP	0.00711744	0.0380505	0.30967	1.51563	1	136
BERENJENO_TRANSFORMED_BY_RHOA_FOREVER_DN	0.0487805	0.133419	0.513078	1.51546	19	15
TCCAGAT,MIR-516-5P	0.00923077	0.0444349	0.330991	1.51534	2	84
GSE22886_NAIVE_BCELL_VS_BLOOD_PLASMA_CELL_UP	0.00729927	0.0383327	0.303813	1.51522	1	159
GSE17974_0H_VS_12H_IN_VITRO_ACT_CD4_TCELL_UP	0.0070922	0.0380505	0.308541	1.5152	1	137
GSE15139_GMCSF_TREATED_VS_UNTREATED_NEUTROPHILS_DN	0.00371747	0.0271266	0.298393	1.51514	0	178
GO_NEGATIVE_REGULATION_OF_BMP_SIGNALING_PATHWAY	0.0457831	0.127602	0.484541	1.51494	18	18
GSE15330_MEGAKARYOCYTE_ERYTHROID_VS_GRANULOCYTE_MONOCYTE_PROGENITOR_IKAROS_KO_DN	0.00743494	0.0386345	0.306774	1.51462	1	142
V$AP4_Q5	0.00722022	0.0381132	0.305437	1.51452	1	143
RUTELLA_RESPONSE_TO_HGF_DN	0.00383142	0.0272718	0.298818	1.51438	0	182
DASU_IL6_SIGNALING_UP	0.0234987	0.0789632	0.413865	1.51435	8	33
GSE43863_NAIVE_VS_TFH_CD4_EFF_TCELL_D6_LCMV_UP	0.00722022	0.0381132	0.305334	1.51401	1	143
HALLMARK_TGF_BETA_SIGNALING	0.0304709	0.0948988	0.392702	1.51399	10	40
GSE22886_DAY1_VS_DAY7_MONOCYTE_IN_CULTURE_UP	0.00743494	0.0386345	0.30659	1.51371	1	142
FEVR_CTNNB1_TARGETS_UP	0.00505051	0.0315396	0.275123	1.51359	0	377
MODULE_13	0.00909091	0.043968	0.287126	1.5131	1	261
STEIN_ESRRA_TARGETS_RESPONSIVE_TO_ESTROGEN_UP	0.0277778	0.0890692	0.448688	1.51268	10	25
BIOCARTA_AGR_PATHWAY	0.0457831	0.127602	0.483758	1.51249	18	18
PARK_HSC_MARKERS	0.0247934	0.0822429	0.399638	1.51234	8	37
GO_REGULATION_OF_FATTY_ACID_METABOLIC_PROCESS	0.0252101	0.0829291	0.37355	1.51221	8	47
CATTGTYY_V$SOX9_B1	0.00884956	0.043208	0.29298	1.51203	1	229
CCTNTMAGA_UNKNOWN	0.0121212	0.0525975	0.339614	1.5116	3	74
GSE22601_DOUBLE_POSITIVE_VS_CD4_SINGLE_POSITIVE_THYMOCYTE_UP	0.0125786	0.0536744	0.321095	1.51138	3	100
GO_BONE_REMODELING	0.0513447	0.138725	0.492151	1.51136	20	17
GO_POSITIVE_REGULATION_OF_CELL_MATRIX_ADHESION	0.0277778	0.0890692	0.448245	1.51118	10	25
GO_LEUKOCYTE_CELL_CELL_ADHESION	0.0106762	0.0482994	0.304569	1.51087	2	147
GO_REGULATION_OF_CELL_GROWTH	0.00840336	0.0420452	0.291581	1.51083	1	220
GO_REGULATION_OF_SYNAPTIC_TRANSMISSION_GABAERGIC	0.0512195	0.138471	0.511462	1.51069	20	15
GSE24671_CTRL_VS_SENDAI_VIRUS_INFECTED_MOUSE_SPLENOCYTES_UP	0.0100334	0.0466328	0.329509	1.51046	2	92
PASQUALUCCI_LYMPHOMA_BY_GC_STAGE_UP	0.00803213	0.040909	0.292481	1.50981	1	207
CHANDRAN_METASTASIS_TOP50_DN	0.0280112	0.0896883	0.397517	1.50974	9	38
GO_LIGAND_DEPENDENT_NUCLEAR_RECEPTOR_BINDING	0.0457831	0.127602	0.482806	1.50952	18	18
IVANOVA_HEMATOPOIESIS_STEM_CELL_SHORT_TERM	0.039312	0.113947	0.464213	1.5095	15	21
GSE6259_BCELL_VS_CD8_TCELL_DN	0.00367647	0.0271266	0.306969	1.50948	0	141
GSE22886_TH1_VS_TH2_12H_ACT_UP	0.00704225	0.0380505	0.30837	1.50925	1	133
GO_ENZYME_LINKED_RECEPTOR_PROTEIN_SIGNALING_PATHWAY	0.00515464	0.0316418	0.273538	1.50924	0	390
GO_ACTIN_POLYMERIZATION_OR_DEPOLYMERIZATION	0.0274314	0.0883227	0.438409	1.50923	10	26
GSE15735_2H_VS_12H_HDAC_INHIBITOR_TREATED_CD4_TCELL_UP	0.00711744	0.0380505	0.30865	1.50918	1	135
REACTOME_NEF_MEDIATES_DOWN_MODULATION_OF_CELL_SURFACE_RECEPTORS_BY_RECRUITING_THEM_TO_CLATHRIN_ADAPTERS	0.0513447	0.138725	0.491437	1.50917	20	17
GO_LIPID_PARTICLE	0.0252101	0.0829291	0.372791	1.50914	8	47
VALK_AML_CLUSTER_3	0.0583942	0.152311	0.499659	1.50896	23	16
GO_TRANSCRIPTIONAL_REPRESSOR_COMPLEX	0.0222841	0.0759765	0.352587	1.50891	7	61
TENEDINI_MEGAKARYOCYTE_MARKERS	0.0308123	0.0956125	0.397271	1.5088	10	38
GO_REGULATION_OF_JUN_KINASE_ACTIVITY	0.030303	0.0945968	0.367718	1.50858	10	50
GSE20715_WT_VS_TLR4_KO_48H_OZONE_LUNG_DN	0.00714286	0.0380505	0.304122	1.5085	1	145
GO_REGULATION_OF_MAP_KINASE_ACTIVITY	0.0078125	0.0399888	0.297344	1.50845	1	187
VANTVEER_BREAST_CANCER_ESR1_UP	0.00651466	0.0362684	0.309088	1.50841	1	118
LI_WILMS_TUMOR_VS_FETAL_KIDNEY_1_UP	0.00662252	0.0366395	0.31138	1.50813	1	115
GSE20366_CD103_POS_VS_CD103_KLRG1_DP_TREG_UP	0.00649351	0.0361959	0.309078	1.5079	1	117
KRAS.DF.V1_DN	0.010101	0.0467351	0.329723	1.50787	2	90
LU_AGING_BRAIN_UP	0.00722022	0.0381132	0.298919	1.50783	1	168
GSE6674_UNSTIM_VS_ANTI_IGM_STIM_BCELL_DN	0.038835	0.113031	0.454252	1.50636	15	22
GO_NEGATIVE_REGULATION_OF_VIRAL_TRANSCRIPTION	0.0383693	0.112018	0.463739	1.50587	15	20
ZHOU_INFLAMMATORY_RESPONSE_FIMA_UP	0.00816327	0.0413715	0.289688	1.50584	1	215
GSE9988_LOW_LPS_VS_VEHICLE_TREATED_MONOCYTE_DN	0.00722022	0.0381132	0.298442	1.50542	1	168
V$SP1_Q4_01	0.00383142	0.0272718	0.297507	1.5054	0	181
GSE17721_LPS_VS_GARDIQUIMOD_16H_BMDC_DN	0.00359712	0.0271266	0.303947	1.50477	0	151
GSE40274_HELIOS_VS_FOXP3_AND_HELIOS_TRANSDUCED_ACTIVATED_CD4_TCELL_UP	0.00687285	0.0375725	0.306974	1.5047	1	131
ZHOU_INFLAMMATORY_RESPONSE_LIVE_UP	0.00869565	0.0427539	0.289547	1.50469	1	230
V$SP1_Q6	0.00387597	0.0273553	0.298187	1.50463	0	180
GSE29949_CD8_POS_DC_SPLEEN_VS_DC_BRAIN_DN	0.00923077	0.0444349	0.328646	1.50461	2	84
REACTOME_INHIBITION_OF_INSULIN_SECRETION_BY_ADRENALINE_NORADRENALINE	0.0583942	0.152311	0.498191	1.50453	23	16
GSE15330_HSC_VS_MEGAKARYOCYTE_ERYTHROID_PROGENITOR_DN	0.0132013	0.0553924	0.307172	1.50437	3	123
GO_CELLULAR_CHEMICAL_HOMEOSTASIS	0.00925926	0.0445078	0.284775	1.50427	1	268
V$HIF1_Q3	0.0107527	0.0483527	0.30137	1.50424	2	155
GO_NEGATIVE_REGULATION_OF_TRANSMEMBRANE_RECEPTOR_PROTEIN_SERINE_THREONINE_KINASE_SIGNALING_PATHWAY	0.0254958	0.0836007	0.365347	1.50412	8	52
GO_PHOSPHOLIPID_BIOSYNTHETIC_PROCESS	0.00757576	0.0390921	0.299449	1.50407	1	170
REACTOME_G_BETA_GAMMA_SIGNALLING_THROUGH_PLC_BETA	0.0536585	0.14315	0.509198	1.50401	21	15
GSE9988_ANTI_TREM1_AND_LPS_VS_VEHICLE_TREATED_MONOCYTES_DN	0.00722022	0.0381132	0.299505	1.50349	1	165
GSE36888_UNTREATED_VS_IL2_TREATED_STAT5_AB_KNOCKIN_TCELL_17H_UP	0.00649351	0.0361959	0.308169	1.50347	1	117
GSE15624_3H_VS_6H_HALOFUGINONE_TREATED_CD4_TCELL_DN	0.0162338	0.0618515	0.315945	1.50334	4	105
GSE13522_CTRL_VS_T_CRUZI_BRAZIL_STRAIN_INF_SKIN_DN	0.010101	0.0467351	0.329107	1.50322	2	89
GO_CELL_KILLING	0.0325815	0.0992473	0.431116	1.5025	12	27
GO_MANGANESE_ION_BINDING	0.027248	0.0879198	0.404587	1.50241	9	35
GO_RESPONSE_TO_RETINOIC_ACID	0.0252809	0.08308	0.371638	1.50214	8	48
GSE17974_CTRL_VS_ACT_IL4_AND_ANTI_IL12_2H_CD4_TCELL_UP	0.00716846	0.0380926	0.303219	1.50173	1	146
GO_PROTEIN_DEMETHYLATION	0.0277778	0.0890692	0.4454	1.50159	10	25
GO_PROTEIN_DEALKYLATION	0.0277778	0.0890692	0.4454	1.50159	10	25
GO_MULTI_MULTICELLULAR_ORGANISM_PROCESS	0.0100334	0.0466328	0.326653	1.50157	2	93
GO_LAMELLIPODIUM_ORGANIZATION	0.0348259	0.104485	0.448557	1.5007	13	24
GSE32986_GMCSF_VS_GMCSF_AND_CURDLAN_HIGHDOSE_STIM_DC_UP	0.00711744	0.0380505	0.3066	1.5006	1	136
V$HEN1_01	0.0130719	0.0550398	0.318229	1.50028	3	102
MASSARWEH_TAMOXIFEN_RESISTANCE_DN	0.00714286	0.0380505	0.302318	1.50018	1	144
GO_NOTCH_SIGNALING_PATHWAY	0.014245	0.0574816	0.345317	1.50014	4	67
GO_ACTIN_BASED_CELL_PROJECTION	0.0100334	0.0466328	0.327223	1.49999	2	92
GSE17974_0H_VS_24H_IN_VITRO_ACT_CD4_TCELL_UP	0.00675676	0.037197	0.306654	1.49986	1	124
GSE6092_IFNG_VS_IFNG_AND_B_BURGDORFERI_INF_ENDOTHELIAL_CELL_UP	0.00714286	0.0380505	0.302362	1.49977	1	145
MORF_STK17A	0.00914634	0.044172	0.336436	1.49972	2	76
MORF_FLT1	0.0280112	0.0896883	0.370451	1.49967	9	47
GO_PROTEIN_DOMAIN_SPECIFIC_BINDING	0.0052356	0.0318022	0.267823	1.49962	0	427
V$E12_Q6	0.00687285	0.0375725	0.305933	1.4996	1	131
REACTOME_SIGNALING_BY_EGFR_IN_CANCER	0.00974026	0.0459913	0.328273	1.49895	2	87
GSE37301_HEMATOPOIETIC_STEM_CELL_VS_RAG2_KO_NK_CELL_UP	0.0106762	0.0482994	0.306245	1.49887	2	136
ACOSTA_PROLIFERATION_INDEPENDENT_MYC_TARGETS_DN	0.0119048	0.0517593	0.338035	1.49885	3	72
TCTGATC,MIR-383	0.0255754	0.0837386	0.411624	1.4987	9	32
TGGNNNNNNKCCAR_UNKNOWN	0.00809717	0.041099	0.290512	1.4985	1	208
V$MZF1_02	0.0108303	0.048381	0.302685	1.4983	2	150
PID_PTP1B_PATHWAY	0.0335052	0.101436	0.416228	1.49828	12	31
GO_REGULATION_OF_CYTOSOLIC_CALCIUM_ION_CONCENTRATION	0.0121212	0.0525975	0.336602	1.49819	3	74
GO_MULTICELLULAR_ORGANISMAL_WATER_HOMEOSTASIS	0.0457831	0.127602	0.479129	1.49802	18	18
IZADPANAH_STEM_CELL_ADIPOSE_VS_BONE_DN	0.0349462	0.104705	0.379396	1.49794	12	42
GSE21670_STAT3_KO_VS_WT_CD4_TCELL_TGFB_IL6_TREATED_DN	0.0106762	0.0482994	0.30602	1.49777	2	136
V$MYCMAX_B	0.0111111	0.0489469	0.296403	1.49764	2	174
MODY_HIPPOCAMPUS_POSTNATAL	0.0349462	0.104705	0.379291	1.49753	12	42
TORCHIA_TARGETS_OF_EWSR1_FLI1_FUSION_DN	0.00873362	0.0428453	0.289173	1.49745	1	221
V$HNF4_DR1_Q3	0.00714286	0.0380505	0.301595	1.49737	1	152
GSE37301_HEMATOPOIETIC_STEM_CELL_VS_LYMPHOID_PRIMED_MPP_UP	0.00714286	0.0380505	0.301585	1.49732	1	152
GSE3982_NEUTROPHIL_VS_TH1_UP	0.00649351	0.0361959	0.30684	1.49698	1	117
CAGNYGKNAAA_UNKNOWN	0.0349462	0.104705	0.379153	1.49698	12	42
REACTOME_NGF_SIGNALLING_VIA_TRKA_FROM_THE_PLASMA_MEMBRANE	0.00967742	0.0459913	0.31169	1.49686	2	109
V$ATF4_Q2	0.00732601	0.038369	0.299005	1.49681	1	164
GO_GROWTH	0.00816327	0.0413715	0.287935	1.49672	1	215
TTGGAGA,MIR-515-5P,MIR-519E	0.0161812	0.0618103	0.314561	1.49653	4	104
GO_RHYTHMIC_PROCESS	0.0143369	0.0574816	0.299768	1.49624	3	155
GSE27786_LSK_VS_CD4_TCELL_DN	0.00722022	0.0381132	0.301712	1.49605	1	143
KEGG_DILATED_CARDIOMYOPATHY	0.028133	0.090035	0.410789	1.49566	10	32
PID_FGF_PATHWAY	0.0287206	0.0911772	0.408717	1.49552	10	33
GSE26495_NAIVE_VS_PD1HIGH_CD8_TCELL_DN	0.00704225	0.0380505	0.305545	1.49543	1	133
GSE7764_NKCELL_VS_SPLENOCYTE_UP	0.0132013	0.0553924	0.305323	1.49532	3	123
PID_RAC1_REG_PATHWAY	0.037594	0.110323	0.429055	1.49531	14	27
BOQUEST_STEM_CELL_UP	0.014881	0.058091	0.337204	1.49517	4	72
GSE17721_CTRL_VS_LPS_1H_BMDC_UP	0.0106762	0.0482994	0.301257	1.49443	2	147
GO_SPINAL_CORD_DEVELOPMENT	0.0309859	0.095965	0.372233	1.49441	10	46
GO_HISTONE_DEACETYLASE_COMPLEX	0.0254237	0.0834261	0.36503	1.49428	8	51
GO_LOCALIZATION_OF_CELL	0.00518135	0.0316601	0.272936	1.49412	0	366
GO_CELL_MOTILITY	0.00518135	0.0316601	0.272936	1.49412	0	366
GSE13411_IGM_MEMORY_BCELL_VS_PLASMA_CELL_UP	0.00760456	0.0392104	0.297823	1.4941	1	172
GSE17580_UNINFECTED_VS_S_MANSONI_INF_TEFF_UP	0.0143369	0.0574816	0.299358	1.49396	3	157
ODONNELL_TFRC_TARGETS_UP	0.0083682	0.0419795	0.287787	1.49373	1	217
GSE26351_UNSTIM_VS_WNT_PATHWAY_STIM_HEMATOPOIETIC_PROGENITORS_UP	0.00714286	0.0380505	0.29622	1.49372	1	167
KEGG_RENAL_CELL_CARCINOMA	0.02849	0.0907206	0.35748	1.49368	9	54
GO_AMINOPEPTIDASE_ACTIVITY	0.0320988	0.0982704	0.413326	1.49339	12	30
GO_SEGMENTATION	0.0328767	0.0999278	0.382833	1.49338	11	41
GSE5589_LPS_VS_LPS_AND_IL10_STIM_IL10_KO_MACROPHAGE_180MIN_UP	0.0125786	0.0536744	0.317191	1.49301	3	100
GO_LIPID_BIOSYNTHETIC_PROCESS	0.0047619	0.0309849	0.274729	1.49261	0	331
V$SRY_01	0.00662252	0.0366395	0.308148	1.49248	1	115
GSE22886_NAIVE_CD8_TCELL_VS_MEMORY_TCELL_DN	0.0143369	0.0574816	0.298933	1.49239	3	158
KEGG_B_CELL_RECEPTOR_SIGNALING_PATHWAY	0.0144928	0.0575696	0.345269	1.49234	4	66
GSE37301_HEMATOPOIETIC_STEM_CELL_VS_PRO_BCELL_UP	0.00346021	0.0271266	0.305152	1.49233	0	127
GO_CELLULAR_RESPONSE_TO_PEPTIDE	0.00380228	0.027195	0.296009	1.49216	0	176
[truncated: 11,341 more rows]

## Sheet: CB vs VB
Supplementary Table 2b: GSEA Comparing Tumor Cells from the bone marrow (B) of Cyclophosphamide (C ) and PBS (V) treated mice engrafted with DFBL-20954. Positive enrichment scores indicate gene sets expressed higher in C as compared to PBS determined by the ordering of the rank ordered differential expression lists.
pathway	pval	padj	ES	NES	nMoreExtreme	size
ZHANG_TLX_TARGETS_36HR_DN	0.0047619	0.025207	0.670379	3.17411	0	173
VERNELL_RETINOBLASTOMA_PATHWAY_UP	0.0030581	0.025207	0.750423	3.03052	0	63
ZHANG_TLX_TARGETS_DN	0.00330033	0.025207	0.695547	2.95331	0	83
CHEN_HOXA5_TARGETS_9HR_UP	0.00458716	0.025207	0.605106	2.90396	0	187
PHONG_TNF_TARGETS_UP	0.00271003	0.025207	0.769952	2.8311	0	38
GSE27241_WT_VS_RORGT_KO_TH17_POLARIZED_CD4_TCELL_TREATED_WITH_DIGOXIN_UP	0.00444444	0.025207	0.588615	2.73873	0	151
KRIGE_AMINO_ACID_DEPRIVATION	0.00246914	0.025207	0.844069	2.73216	0	24
DACOSTA_UV_RESPONSE_VIA_ERCC3_COMMON_DN	0.00763359	0.0343357	0.523678	2.72688	0	416
HAMAI_APOPTOSIS_VIA_TRAIL_UP	0.00854701	0.0366395	0.51136	2.697	0	471
GSE3920_UNTREATED_VS_IFNA_TREATED_FIBROBLAST_UP	0.003861	0.025207	0.591866	2.68997	0	129
ZHAN_MULTIPLE_MYELOMA_CD1_VS_CD2_UP	0.00280112	0.025207	0.698776	2.64373	0	43
PYEON_CANCER_HEAD_AND_NECK_VS_CERVICAL_UP	0.00444444	0.025207	0.571638	2.63801	0	149
GHANDHI_DIRECT_IRRADIATION_UP	0.00284091	0.025207	0.681922	2.63488	0	48
HALLMARK_TNFA_SIGNALING_VIA_NFKB	0.00420168	0.025207	0.578126	2.60677	0	132
GO_DNA_REPLICATION	0.0044843	0.025207	0.537807	2.58446	0	184
DUTERTRE_ESTRADIOL_RESPONSE_24HR_UP	0.00531915	0.0264608	0.512576	2.57451	0	270
GSE2706_UNSTIM_VS_2H_R848_DC_DN	0.003663	0.025207	0.574661	2.55917	0	110
GABRIELY_MIR21_TARGETS	0.00478469	0.025207	0.513284	2.52484	0	233
DAZARD_RESPONSE_TO_UV_NHEK_DN	0.00520833	0.0261732	0.505091	2.52228	0	264
STEIN_ESR1_TARGETS	0.00303951	0.025207	0.632463	2.51827	0	56
ZHANG_TLX_TARGETS_60HR_DN	0.005	0.0255893	0.506957	2.51542	0	244
GSE2770_IL4_ACT_VS_ACT_CD4_TCELL_2H_DN	0.00454545	0.025207	0.526353	2.50228	0	166
GSE21670_UNTREATED_VS_TGFB_IL6_TREATED_CD4_TCELL_UP	0.00452489	0.025207	0.525994	2.49956	0	167
GSE7509_FCGRIIB_VS_TNFA_IL1B_IL6_PGE_STIM_DC_DN	0.00346021	0.025207	0.575041	2.49789	0	95
ZHAN_MULTIPLE_MYELOMA_CD1_UP	0.00254453	0.025207	0.72097	2.49484	0	31
HALLMARK_MITOTIC_SPINDLE	0.00444444	0.025207	0.517641	2.49374	0	182
GINESTIER_BREAST_CANCER_20Q13_AMPLIFICATION_DN	0.0045045	0.025207	0.537823	2.48793	0	150
GSE2706_UNSTIM_VS_2H_LPS_DC_DN	0.00353357	0.025207	0.556508	2.47681	0	108
GSE3920_UNTREATED_VS_IFNG_TREATED_ENDOTHELIAL_CELL_UP	0.00332226	0.025207	0.578073	2.46159	0	85
GSE7509_UNSTIM_VS_FCGRIIB_STIM_MONOCYTE_DN	0.00403226	0.025207	0.535883	2.46056	0	138
GSE3920_IFNA_VS_IFNG_TREATED_ENDOTHELIAL_CELL_UP	0.003861	0.025207	0.54107	2.45911	0	129
GSE27241_CTRL_VS_DIGOXIN_TREATED_CD4_TCELL_IN_TH17_POLARIZING_CONDITIONS_UP	0.00380228	0.025207	0.553829	2.45812	0	114
ZHANG_RESPONSE_TO_IKK_INHIBITOR_AND_TNF_UP	0.00406504	0.025207	0.537752	2.44336	0	131
GO_HELICASE_ACTIVITY	0.00409836	0.025207	0.533084	2.43963	0	139
KIM_WT1_TARGETS_UP	0.00406504	0.025207	0.536521	2.43776	0	131
GSE41176_UNSTIM_VS_ANTI_IGM_STIM_BCELL_1H_UP	0.00353357	0.025207	0.547594	2.43714	0	108
GARGALOVIC_RESPONSE_TO_OXIDIZED_PHOSPHOLIPIDS_RED_UP	0.00230947	0.025207	0.85282	2.43627	0	15
STEIN_ESRRA_TARGETS_RESPONSIVE_TO_ESTROGEN_DN	0.00253165	0.025207	0.694772	2.4295	0	32
GSE25146_UNSTIM_VS_HELIOBACTER_PYLORI_LPS_STIM_AGS_CELL_UP	0.00436681	0.025207	0.519086	2.42135	0	152
V$E2F_Q6	0.00446429	0.025207	0.502631	2.42135	0	186
HELLER_SILENCED_BY_METHYLATION_DN	0.003125	0.025207	0.580386	2.41247	0	75
TIAN_TNF_SIGNALING_VIA_NFKB	0.00230947	0.025207	0.841815	2.40484	0	15
GSE2706_UNSTIM_VS_2H_LPS_AND_R848_DC_DN	0.00380228	0.025207	0.540814	2.40035	0	114
V$E2F_Q4	0.00483092	0.025207	0.503273	2.39925	0	189
GSE17721_LPS_VS_PAM3CSK4_1H_BMDC_DN	0.00421941	0.025207	0.53029	2.39657	0	133
BURTON_ADIPOGENESIS_12	0.0025974	0.025207	0.734415	2.39557	0	26
GO_INTRINSIC_APOPTOTIC_SIGNALING_PATHWAY_IN_RESPONSE_TO_ENDOPLASMIC_RETICULUM_STRESS	0.00254453	0.025207	0.728391	2.39475	0	27
BROWNE_HCMV_INFECTION_2HR_UP	0.00230947	0.025207	0.836343	2.38921	0	15
SMIRNOV_RESPONSE_TO_IR_2HR_UP	0.00274725	0.025207	0.639991	2.38843	0	41
GO_DOUBLE_STRANDED_DNA_BINDING	0.00917431	0.0382552	0.450647	2.38526	0	490
GO_CHROMATIN_BINDING	0.00588235	0.0285592	0.467965	2.38323	0	318
V$NFKAPPAB_01	0.00409836	0.025207	0.519489	2.37742	0	139
PHONG_TNF_RESPONSE_NOT_VIA_P38	0.00487805	0.025207	0.482311	2.37287	0	235
NAGASHIMA_NRG1_SIGNALING_UP	0.00403226	0.025207	0.533547	2.3548	0	119
GCM_FANCL	0.00246914	0.025207	0.725275	2.34764	0	24
GINESTIER_BREAST_CANCER_ZNF217_AMPLIFIED_DN	0.00531915	0.0264608	0.466164	2.34716	0	272
GSE8515_CTRL_VS_IL1_4H_STIM_MAC_DN	0.00420168	0.025207	0.52031	2.34607	0	132
PHONG_TNF_RESPONSE_VIA_P38_PARTIAL	0.00364964	0.025207	0.527665	2.33716	0	106
GSE21360_SECONDARY_VS_QUATERNARY_MEMORY_CD8_TCELL_UP	0.00357143	0.025207	0.532624	2.33687	0	100
WHITFIELD_CELL_CYCLE_G1_S	0.004	0.025207	0.524796	2.33127	0	124
PID_CD40_PATHWAY	0.0025	0.025207	0.710912	2.33076	0	25
TOYOTA_TARGETS_OF_MIR34B_AND_MIR34C	0.00636943	0.0300167	0.446982	2.32898	0	380
ATGTACA,MIR-493	0.00487805	0.025207	0.475521	2.32601	0	224
GSE2770_UNTREATED_VS_IL12_TREATED_ACT_CD4_TCELL_6H_UP	0.00421941	0.025207	0.505583	2.31791	0	142
RASHI_RESPONSE_TO_IONIZING_RADIATION_2	0.00321543	0.025207	0.550409	2.31675	0	80
GO_RNA_POLYMERASE_II_TRANSCRIPTION_FACTOR_ACTIVITY_SEQUENCE_SPECIFIC_DNA_BINDING	0.00625	0.0297483	0.452783	2.31355	0	332
PID_E2F_PATHWAY	0.00321543	0.025207	0.574156	2.31275	0	64
GSE7219_WT_VS_NIK_NFKB2_KO_DC_UP	0.00421941	0.025207	0.502751	2.30492	0	142
GSE29617_CTRL_VS_DAY3_TIV_FLU_VACCINE_PBMC_2008_UP	0.00420168	0.025207	0.508478	2.29272	0	132
ZWANG_CLASS_3_TRANSIENTLY_INDUCED_BY_EGF	0.00392157	0.025207	0.504227	2.29137	0	130
GSE21063_CTRL_VS_ANTI_IGM_STIM_BCELL_NFATC1_KO_8H_UP	0.00444444	0.025207	0.492063	2.28949	0	151
MOLENAAR_TARGETS_OF_CCND1_AND_CDK4_DN	0.00297619	0.025207	0.591569	2.28483	0	49
GO_DNA_DEPENDENT_ATPASE_ACTIVITY	0.00314465	0.025207	0.545089	2.28297	0	76
GSE9988_ANTI_TREM1_VS_ANTI_TREM1_AND_LPS_MONOCYTE_DN	0.00380228	0.025207	0.513928	2.28102	0	114
GSE25146_UNSTIM_VS_HELIOBACTER_PYLORI_LPS_STIM_AGS_CELL_DN	0.00409836	0.025207	0.498373	2.28078	0	139
V$E2F1_Q6	0.00458716	0.025207	0.474699	2.27813	0	187
V$E2F1DP1RB_01	0.00465116	0.025207	0.478551	2.27355	0	179
GSE45365_HEALTHY_VS_MCMV_INFECTION_CD11B_DC_UP	0.00406504	0.025207	0.500098	2.27227	0	131
BCAT_BILD_ET_AL_DN	0.00271003	0.025207	0.617448	2.27035	0	38
GSE9988_LPS_VS_CTRL_TREATED_MONOCYTE_UP	0.00367647	0.025207	0.509948	2.26988	0	111
MODULE_123	0.00458716	0.025207	0.482815	2.26961	0	157
ZHOU_INFLAMMATORY_RESPONSE_LPS_UP	0.00458716	0.025207	0.47679	2.26505	0	169
V$E2F1_Q3	0.00458716	0.025207	0.471961	2.26499	0	187
HOEBEKE_LYMPHOID_STEM_CELL_UP	0.00321543	0.025207	0.550328	2.26125	0	71
ST_TUMOR_NECROSIS_FACTOR_PATHWAY	0.0025	0.025207	0.689307	2.25993	0	25
CHO_NR4A1_TARGETS	0.00234192	0.025207	0.775365	2.25139	0	16
GO_REGULATION_OF_TRANSCRIPTION_INVOLVED_IN_G1_S_TRANSITION_OF_MITOTIC_CELL_CYCLE	0.0025	0.025207	0.686662	2.25126	0	25
GO_DNA_HELICASE_ACTIVITY	0.00297619	0.025207	0.573107	2.24915	0	52
GSE45881_CXCR6HI_VS_CXCR1LO_COLONIC_LAMINA_PROPRIA_UP	0.00458716	0.025207	0.472571	2.24501	0	169
V$E2F_Q3	0.00471698	0.025207	0.473484	2.2426	0	172
GSE9988_LOW_LPS_VS_VEHICLE_TREATED_MONOCYTE_UP	0.00380228	0.025207	0.504893	2.24092	0	114
TGFB_UP.V1_UP	0.00357143	0.025207	0.506697	2.23966	0	102
GSE40666_WT_VS_STAT1_KO_CD8_TCELL_UP	0.00420168	0.025207	0.487556	2.23479	0	143
GSE9988_LOW_LPS_VS_CTRL_TREATED_MONOCYTE_UP	0.00389105	0.025207	0.505925	2.23233	0	115
BIOCARTA_TNFR2_PATHWAY	0.00234192	0.025207	0.767658	2.22901	0	16
LINDSTEDT_DENDRITIC_CELL_MATURATION_B	0.00269542	0.025207	0.59765	2.22759	0	40
GSE43863_DAY6_EFF_VS_DAY150_MEM_TH1_CD4_TCELL_DN	0.00420168	0.025207	0.486908	2.22583	0	140
SEKI_INFLAMMATORY_RESPONSE_LPS_UP	0.00274725	0.025207	0.596302	2.22539	0	41
GO_CENTROSOME_DUPLICATION	0.0025974	0.025207	0.653526	2.22537	0	30
BILD_E2F3_ONCOGENIC_SIGNATURE	0.00458716	0.025207	0.468434	2.22536	0	169
GSE26343_UNSTIM_VS_LPS_STIM_NFAT5_KO_MACROPHAGE_DN	0.00409836	0.025207	0.48609	2.22457	0	139
ALTEMEIER_RESPONSE_TO_LPS_WITH_MECHANICAL_VENTILATION	0.00321543	0.025207	0.552251	2.22451	0	64
REACTOME_AMINO_ACID_AND_OLIGOPEPTIDE_SLC_TRANSPORTERS	0.002457	0.025207	0.706331	2.22356	0	22
SGCGSSAAA_V$E2F1DP2_01	0.00406504	0.025207	0.484387	2.22311	0	137
GO_STRAND_DISPLACEMENT	0.0025974	0.025207	0.680323	2.21913	0	26
GO_TRANSCRIPTIONAL_ACTIVATOR_ACTIVITY_RNA_POLYMERASE_II_TRANSCRIPTION_REGULATORY_REGION_SEQUENCE_SPECIFIC_BINDING	0.00452489	0.025207	0.469257	2.2174	0	159
GSE41867_NAIVE_VS_DAY30_LCMV_CLONE13_EXHAUSTED_CD8_TCELL_UP	0.00357143	0.025207	0.502842	2.21388	0	101
FOSTER_TOLERANT_MACROPHAGE_DN	0.00574713	0.0280456	0.439738	2.2086	0	281
GO_MICROTUBULE_MOTOR_ACTIVITY	0.00284091	0.025207	0.570948	2.20609	0	48
V$E2F_02	0.00458716	0.025207	0.459673	2.20601	0	187
SENGUPTA_NASOPHARYNGEAL_CARCINOMA_UP	0.00492611	0.0253571	0.459646	2.2046	0	211
WHITFIELD_CELL_CYCLE_S	0.00421941	0.025207	0.487736	2.20425	0	133
GO_REGULATION_OF_EPITHELIAL_CELL_APOPTOTIC_PROCESS	0.00246914	0.025207	0.680896	2.20399	0	24
RODRIGUES_THYROID_CARCINOMA_DN	0.00284091	0.025207	0.57009	2.20277	0	48
REACTOME_G1_S_SPECIFIC_TRANSCRIPTION	0.00234192	0.025207	0.747044	2.2018	0	17
GTGCAAA,MIR-507	0.00331126	0.025207	0.511473	2.19178	0	86
V$E2F4DP2_01	0.00458716	0.025207	0.456188	2.18929	0	187
V$E2F1DP2_01	0.00458716	0.025207	0.456188	2.18929	0	187
V$E2F1DP1_01	0.00458716	0.025207	0.456188	2.18929	0	187
GSE14769_UNSTIM_VS_40MIN_LPS_BMDM_DN	0.00436681	0.025207	0.473047	2.18797	0	148
V$NFKB_Q6_01	0.00416667	0.025207	0.480231	2.18365	0	134
GARGALOVIC_RESPONSE_TO_OXIDIZED_PHOSPHOLIPIDS_BLUE_UP	0.00362319	0.025207	0.494666	2.1833	0	103
GSE19198_CTRL_VS_IL21_TREATED_TCELL_24H_UP	0.00393701	0.025207	0.486798	2.18258	0	126
GSE32986_CURDLAN_HIGHDOSE_VS_GMCSF_AND_CURDLAN_HIGHDOSE_STIM_DC_DN	0.00403226	0.025207	0.474986	2.18095	0	138
LINDSTEDT_DENDRITIC_CELL_MATURATION_A	0.0027027	0.025207	0.613356	2.17983	0	35
DIRMEIER_LMP1_RESPONSE_EARLY	0.0030581	0.025207	0.548781	2.17896	0	55
DUTERTRE_ESTRADIOL_RESPONSE_6HR_UP	0.00454545	0.025207	0.458187	2.17822	0	166
GSE7219_UNSTIM_VS_LPS_AND_ANTI_CD40_STIM_NIK_NFKB2_KO_DC_DN	0.00421941	0.025207	0.474932	2.17738	0	142
GEORGES_CELL_CYCLE_MIR192_TARGETS	0.00301205	0.025207	0.547659	2.17444	0	54
V$E2F4DP1_01	0.00446429	0.025207	0.4512	2.17358	0	186
REACTOME_AMINO_ACID_TRANSPORT_ACROSS_THE_PLASMA_MEMBRANE	0.00234192	0.025207	0.737333	2.17318	0	17
GO_LYSINE_ACETYLATED_HISTONE_BINDING	0.00230947	0.025207	0.760256	2.17184	0	15
GSE2405_S_AUREUS_VS_A_PHAGOCYTOPHILUM_NEUTROPHIL_DN	0.00452489	0.025207	0.462213	2.17029	0	155
GO_HISTONE_DEMETHYLASE_ACTIVITY	0.00248756	0.025207	0.682487	2.16851	0	23
DACOSTA_UV_RESPONSE_VIA_ERCC3_TTD_DN	0.00307692	0.025207	0.535052	2.1685	0	61
DACOSTA_UV_RESPONSE_VIA_ERCC3_XPCS_DN	0.00323625	0.025207	0.537546	2.1656	0	67
KOBAYASHI_EGFR_SIGNALING_24HR_DN	0.00492611	0.0253571	0.451386	2.16499	0	211
GNF2_PCNA	0.00323625	0.025207	0.537279	2.16453	0	67
GCM_MYST2	0.00456621	0.025207	0.456562	2.16385	0	165
GSE31082_CD4_VS_CD8_SP_THYMOCYTE_UP	0.00469484	0.025207	0.461964	2.15985	0	156
GO_METHYLATED_HISTONE_BINDING	0.00280112	0.025207	0.570879	2.15985	0	43
BMI1_DN_MEL18_DN.V1_UP	0.00310559	0.025207	0.536489	2.15928	0	62
DIRMEIER_LMP1_RESPONSE_LATE_UP	0.00280899	0.025207	0.566201	2.15822	0	45
AMUNDSON_RESPONSE_TO_ARSENITE	0.00454545	0.025207	0.449871	2.15747	0	185
WANG_METHYLATED_IN_BREAST_CANCER	0.002457	0.025207	0.684459	2.1547	0	22
GO_CENTROSOME_CYCLE	0.00280112	0.025207	0.569349	2.15406	0	43
ZHOU_INFLAMMATORY_RESPONSE_LIVE_UP	0.00480769	0.025207	0.43803	2.1518	0	230
V$E2F_Q3_01	0.00458716	0.025207	0.448163	2.15078	0	187
GSE13485_DAY3_VS_DAY21_YF17D_VACCINE_PBMC_UP	0.00456621	0.025207	0.456214	2.14935	0	161
GSE14769_UNSTIM_VS_80MIN_LPS_BMDM_DN	0.00409836	0.025207	0.469481	2.14856	0	139
GSE9988_LPS_VS_VEHICLE_TREATED_MONOCYTE_UP	0.00377358	0.025207	0.481903	2.1457	0	113
SESTO_RESPONSE_TO_UV_C5	0.00269542	0.025207	0.575241	2.14407	0	40
BURTON_ADIPOGENESIS_PEAK_AT_16HR	0.00265957	0.025207	0.588037	2.14306	0	37
PODAR_RESPONSE_TO_ADAPHOSTIN_UP	0.00392157	0.025207	0.481977	2.14175	0	121
V$E2F1_Q4_01	0.00438596	0.025207	0.443569	2.14076	0	183
GO_KINESIN_COMPLEX	0.00274725	0.025207	0.573406	2.13994	0	41
GRESHOCK_CANCER_COPY_NUMBER_UP	0.00483092	0.025207	0.432576	2.13809	0	241
GO_TRANSCRIPTIONAL_REPRESSOR_ACTIVITY_RNA_POLYMERASE_II_TRANSCRIPTION_REGULATORY_REGION_SEQUENCE_SPECIFIC_BINDING	0.00357143	0.025207	0.485512	2.13759	0	101
GSE14769_UNSTIM_VS_60MIN_LPS_BMDM_DN	0.00421941	0.025207	0.465112	2.13726	0	144
GO_CORE_PROMOTER_PROXIMAL_REGION_DNA_BINDING	0.00487805	0.025207	0.436918	2.13718	0	224
GO_TRANSCRIPTION_COREPRESSOR_ACTIVITY	0.00452489	0.025207	0.45493	2.13609	0	155
GSE8515_IL1_VS_IL6_4H_STIM_MAC_UP	0.00421941	0.025207	0.472651	2.13608	0	133
GSE18791_CTRL_VS_NEWCASTLE_VIRUS_DC_18H_DN	0.00367647	0.025207	0.47958	2.1347	0	111
GSE21033_CTRL_VS_POLYIC_STIM_DC_6H_DN	0.00364964	0.025207	0.48224	2.13368	0	105
GCM_RAB10	0.00460829	0.025207	0.453123	2.13359	0	158
GSE18281_SUBCAPSULAR_CORTICAL_REGION_VS_WHOLE_MEDULLA_THYMUS_UP	0.00406504	0.025207	0.464881	2.1329	0	136
GO_REGULATION_OF_DNA_DEPENDENT_DNA_REPLICATION	0.0027027	0.025207	0.600001	2.13237	0	35
GO_RETINOIC_ACID_RECEPTOR_BINDING	0.00242131	0.025207	0.687846	2.13231	0	21
VILIMAS_NOTCH1_TARGETS_UP	0.0025	0.025207	0.633586	2.13115	0	28
STARK_PREFRONTAL_CORTEX_22Q11_DELETION_UP	0.00421941	0.025207	0.471396	2.13041	0	133
PRC2_EED_UP.V1_DN	0.00416667	0.025207	0.468514	2.13038	0	134
MORF_RUNX1	0.00332226	0.025207	0.499456	2.12682	0	85
GALINDO_IMMUNE_RESPONSE_TO_ENTEROTOXIN	0.00309598	0.025207	0.53266	2.12648	0	58
GSE22886_DAY1_VS_DAY7_MONOCYTE_IN_CULTURE_UP	0.00421941	0.025207	0.464965	2.12636	0	141
GSE41867_DAY8_VS_DAY15_LCMV_CLONE13_EFFECTOR_CD8_TCELL_UP	0.00460829	0.025207	0.451566	2.12626	0	158
BHAT_ESR1_TARGETS_NOT_VIA_AKT1_UP	0.00377358	0.025207	0.477304	2.12522	0	113
PYEON_HPV_POSITIVE_TUMORS_UP	0.00315457	0.025207	0.512123	2.12434	0	73
GGGNNTTTCC_V$NFKB_Q6_01	0.00310559	0.025207	0.505348	2.1233	0	77
GSE27241_WT_VS_RORGT_KO_TH17_POLARIZED_CD4_TCELL_UP	0.004	0.025207	0.477644	2.12181	0	124
GSE11057_EFF_MEM_VS_CENT_MEM_CD4_TCELL_DN	0.00371747	0.025207	0.475954	2.1212	0	112
PACHER_TARGETS_OF_IGF1_AND_IGF2_UP	0.00254453	0.025207	0.644497	2.11893	0	27
GO_NEGATIVE_REGULATION_OF_DNA_DEPENDENT_DNA_REPLICATION	0.00230947	0.025207	0.740692	2.11596	0	15
GO_REGULATION_OF_EXTRINSIC_APOPTOTIC_SIGNALING_PATHWAY_VIA_DEATH_DOMAIN_RECEPTORS	0.0027027	0.025207	0.594962	2.11446	0	35
GO_CHROMATIN_MODIFICATION	0.00746269	0.0337149	0.400208	2.11399	0	439
GO_REGULATION_OF_HISTONE_METHYLATION	0.00277008	0.025207	0.557263	2.11393	0	44
GO_PURINE_NTP_DEPENDENT_HELICASE_ACTIVITY	0.00334448	0.025207	0.492411	2.1126	0	88
GSE41867_DAY15_EFFECTOR_VS_DAY30_MEMORY_CD8_TCELL_LCMV_ARMSTRONG_DN	0.00371747	0.025207	0.474017	2.11257	0	112
SCHEIDEREIT_IKK_INTERACTING_PROTEINS	0.00277778	0.025207	0.545965	2.11114	0	47
UDAYAKUMAR_MED1_TARGETS_DN	0.0047619	0.025207	0.445852	2.11102	0	173
GO_NEGATIVE_REGULATION_OF_TRANSCRIPTION_FROM_RNA_POLYMERASE_II_PROMOTER	0.00869565	0.0372168	0.39989	2.10988	0	481
E2F3_UP.V1_UP	0.00367647	0.025207	0.473528	2.10777	0	111
KAUFFMANN_DNA_REPLICATION_GENES	0.00392157	0.025207	0.463005	2.10404	0	130
KIM_WT1_TARGETS_8HR_UP	0.00367647	0.025207	0.472553	2.10343	0	111
PID_FANCONI_PATHWAY	0.00280112	0.025207	0.555776	2.10271	0	43
BENPORATH_ES_CORE_NINE_CORRELATED	0.00330033	0.025207	0.494548	2.09987	0	83
NGUYEN_NOTCH1_TARGETS_DN	0.00318471	0.025207	0.519545	2.09872	0	65
SENESE_HDAC1_AND_HDAC2_TARGETS_UP	0.00392157	0.025207	0.461649	2.09788	0	130
GO_PROTEIN_DEMETHYLATION	0.0025	0.025207	0.639724	2.09737	0	25
GO_PROTEIN_DEALKYLATION	0.0025	0.025207	0.639724	2.09737	0	25
GO_TRANSCRIPTION_FACTOR_ACTIVITY_RNA_POLYMERASE_II_CORE_PROMOTER_PROXIMAL_REGION_SEQUENCE_SPECIFIC_BINDING	0.00473934	0.025207	0.44212	2.09721	0	180
MITSIADES_RESPONSE_TO_APLIDIN_DN	0.00485437	0.025207	0.425653	2.09493	0	236
GO_NUCLEAR_SPECK	0.0047619	0.025207	0.442355	2.09446	0	173
GSE37301_HEMATOPOIETIC_STEM_CELL_VS_GRAN_MONO_PROGENITOR_UP	0.00362319	0.025207	0.472883	2.09271	0	107
GO_TRANSCRIPTION_FACTOR_ACTIVITY_RNA_POLYMERASE_II_DISTAL_ENHANCER_SEQUENCE_SPECIFIC_BINDING	0.00280899	0.025207	0.54894	2.09242	0	45
GO_VASCULOGENESIS	0.0025	0.025207	0.638176	2.0923	0	25
GSE40274_CTRL_VS_EOS_TRANSDUCED_ACTIVATED_CD4_TCELL_UP	0.00401606	0.025207	0.466789	2.09166	0	127
NOJIMA_SFRP2_TARGETS_UP	0.00239234	0.025207	0.684452	2.09062	0	20
GEISS_RESPONSE_TO_DSRNA_UP	0.00254453	0.025207	0.635572	2.08959	0	27
GTGTGAG,MIR-342	0.00280112	0.025207	0.551828	2.08777	0	43
ERB2_UP.V1_DN	0.0041841	0.025207	0.45213	2.08727	0	145
GO_CORE_PROMOTER_BINDING	0.00358423	0.025207	0.472127	2.08686	0	104
JACKSON_DNMT1_TARGETS_UP	0.00308642	0.025207	0.537519	2.08567	0	51
GO_DNA_DEPENDENT_DNA_REPLICATION	0.00331126	0.025207	0.486609	2.08523	0	86
MORF_MYC	0.00265252	0.025207	0.577788	2.08518	0	36
GSE21033_1H_VS_24H_POLYIC_STIM_DC_UP	0.00403226	0.025207	0.471779	2.08218	0	119
GSE17974_IL4_AND_ANTI_IL12_VS_UNTREATED_12H_ACT_CD4_TCELL_DN	0.00321543	0.025207	0.506736	2.08213	0	71
PEREZ_TP63_TARGETS	0.00444444	0.025207	0.45098	2.08119	0	149
BARRIER_CANCER_RELAPSE_NORMAL_SAMPLE_DN	0.00254453	0.025207	0.631702	2.07686	0	27
DAZARD_RESPONSE_TO_UV_SCC_DN	0.00362319	0.025207	0.469268	2.07671	0	107
TIAN_TNF_SIGNALING_NOT_VIA_NFKB	0.00234192	0.025207	0.704469	2.07632	0	17
GCM_MLL	0.00460829	0.025207	0.440942	2.07623	0	158
NAGASHIMA_EGF_SIGNALING_UP	0.00265957	0.025207	0.569605	2.07589	0	37
GO_ATP_DEPENDENT_DNA_HELICASE_ACTIVITY	0.00265252	0.025207	0.584364	2.0738	0	34
GSE9988_ANTI_TREM1_VS_LOW_LPS_MONOCYTE_DN	0.00389105	0.025207	0.464202	2.07274	0	122
GO_LIGAND_DEPENDENT_NUCLEAR_RECEPTOR_BINDING	0.00235849	0.025207	0.694304	2.07167	0	18
GSE40277_EOS_AND_LEF1_TRANSDUCED_VS_CTRL_CD4_TCELL_UP	0.0041841	0.025207	0.448671	2.0713	0	145
GSE13485_DAY1_VS_DAY21_YF17D_VACCINE_PBMC_UP	0.00421941	0.025207	0.450534	2.07027	0	144
GSE17186_CD21LOW_VS_CD21HIGH_TRANSITIONAL_BCELL_UP	0.00436681	0.025207	0.443765	2.07001	0	152
MORF_CDC2L5	0.00364964	0.025207	0.46732	2.06987	0	106
GSE30971_CTRL_VS_LPS_STIM_MACROPHAGE_WBP7_HET_2H_UP	0.00380228	0.025207	0.46629	2.06959	0	114
MORF_RAD54L	0.00362319	0.025207	0.468821	2.06923	0	103
REACTOME_TRANSPORT_OF_INORGANIC_CATIONS_ANIONS_AND_AMINO_ACIDS_OLIGOPEPTIDES	0.00283286	0.025207	0.554495	2.06634	0	42
GO_DEMETHYLASE_ACTIVITY	0.00257069	0.025207	0.612019	2.06519	0	29
GO_PROTEIN_LOCALIZATION_TO_CYTOSKELETON	0.0025	0.025207	0.629476	2.06377	0	25
MORF_ESR1	0.00344828	0.025207	0.478623	2.06348	0	94
BROWNE_HCMV_INFECTION_20HR_UP	0.00446429	0.025207	0.428266	2.06311	0	186
GSE14000_UNSTIM_VS_4H_LPS_DC_TRANSLATED_RNA_DN	0.00362319	0.025207	0.465475	2.05992	0	107
GSE9988_ANTI_TREM1_VS_LPS_MONOCYTE_DN	0.004	0.025207	0.463614	2.05949	0	124
GSE2770_UNTREATED_VS_ACT_CD4_TCELL_6H_DN	0.00421941	0.025207	0.448999	2.05849	0	142
GCM_PPM1D	0.002457	0.025207	0.653674	2.05779	0	22
EGUCHI_CELL_CYCLE_RB1_TARGETS	0.00248756	0.025207	0.647609	2.05769	0	23
CHEN_LVAD_SUPPORT_OF_FAILING_HEART_UP	0.00306748	0.025207	0.514523	2.0558	0	57
GSE12003_4D_VS_8D_CULTURE_BM_PROGENITOR_DN	0.00334448	0.025207	0.479121	2.05558	0	88
GSE21063_CTRL_VS_ANTI_IGM_STIM_BCELL_NFATC1_KO_3H_DN	0.00420168	0.025207	0.448458	2.05558	0	143
GO_SITE_OF_DOUBLE_STRAND_BREAK	0.00254453	0.025207	0.625122	2.05523	0	27
BIOCARTA_ATM_PATHWAY	0.00235849	0.025207	0.680299	2.05499	0	19
V$NFKB_Q6	0.0042735	0.025207	0.446619	2.05462	0	146
GOBERT_OLIGODENDROCYTE_DIFFERENTIATION_UP	0.00854701	0.0366395	0.388978	2.05304	0	473
KAUFFMANN_MELANOMA_RELAPSE_UP	0.00308642	0.025207	0.508016	2.05252	0	60
V$E2F1_Q6_01	0.0047619	0.025207	0.428082	2.05227	0	194
CONCANNON_APOPTOSIS_BY_EPOXOMICIN_UP	0.0047619	0.025207	0.433214	2.05119	0	173
GO_RESPONSE_TO_EXOGENOUS_DSRNA	0.00242131	0.025207	0.661124	2.04947	0	21
GSE45837_WT_VS_GFI1_KO_PDC_UP	0.00346021	0.025207	0.471737	2.04915	0	95
PLASARI_TGFB1_TARGETS_10HR_UP	0.00330033	0.025207	0.482413	2.04834	0	83
GO_MOTOR_ACTIVITY	0.00309598	0.025207	0.493201	2.04829	0	74
GO_POSITIVE_REGULATION_OF_TRANSCRIPTION_FROM_RNA_POLYMERASE_II_PROMOTER_IN_RESPONSE_TO_STRESS	0.00234192	0.025207	0.694942	2.04824	0	17
GO_CENTRIOLE_ASSEMBLY	0.00234192	0.025207	0.694863	2.04801	0	17
GSE23505_IL6_IL1_VS_IL6_IL1_IL23_TREATED_CD4_TCELL_DN	0.00460829	0.025207	0.435002	2.0471	0	162
GSE7596_AKT_TRANSD_VS_CTRL_CD4_TCONV_WITH_TGFB_UP	0.00414938	0.025207	0.448531	2.04661	0	135
GHANDHI_BYSTANDER_IRRADIATION_UP	0.00254453	0.025207	0.590117	2.04204	0	31
ABE_VEGFA_TARGETS_2HR	0.00235849	0.025207	0.675684	2.04104	0	19
BOQUEST_STEM_CELL_CULTURED_VS_FRESH_UP	0.00485437	0.025207	0.422833	2.04084	0	213
SIG_CD40PATHWAYMAP	0.0025	0.025207	0.606362	2.03958	0	28
BERENJENO_TRANSFORMED_BY_RHOA_FOREVER_DN	0.00461894	0.025207	0.713931	2.03951	1	15
GO_K63_LINKED_POLYUBIQUITIN_BINDING	0.00234192	0.025207	0.70224	2.03906	0	16
ST_GAQ_PATHWAY	0.002457	0.025207	0.647505	2.03837	0	22
BROWNE_HCMV_INFECTION_8HR_DN	0.00259067	0.025207	0.578349	2.03781	0	33
GSE14769_UNSTIM_VS_20MIN_LPS_BMDM_DN	0.00392157	0.025207	0.44814	2.03649	0	130
GSE9988_ANTI_TREM1_AND_LPS_VS_CTRL_TREATED_MONOCYTES_UP	0.004	0.025207	0.457981	2.03447	0	124
GSE24634_NAIVE_CD4_TCELL_VS_DAY7_IL4_CONV_TREG_UP	0.00460829	0.025207	0.432012	2.03419	0	158
GO_CHROMOSOME_CONDENSATION	0.002457	0.025207	0.646043	2.03377	0	22
GROSS_HYPOXIA_VIA_ELK3_ONLY_UP	0.002457	0.025207	0.645971	2.03354	0	22
GSE27896_HDAC6_KO_VS_WT_TREG_UP	0.00414938	0.025207	0.445476	2.03267	0	135
DAZARD_UV_RESPONSE_CLUSTER_G6	0.00393701	0.025207	0.456134	2.03175	0	123
PICCALUGA_ANGIOIMMUNOBLASTIC_LYMPHOMA_DN	0.00389105	0.025207	0.459296	2.02937	0	117
GO_COVALENT_CHROMATIN_MODIFICATION	0.00549451	0.0271608	0.402139	2.02813	0	278
GSE29617_CTRL_VS_TIV_FLU_VACCINE_PBMC_2008_UP	0.00401606	0.025207	0.452552	2.02786	0	127
V$AP2ALPHA_01	0.00436681	0.025207	0.43462	2.02735	0	152
GCGSCMNTTT_UNKNOWN	0.00307692	0.025207	0.500092	2.02682	0	61
GSE36891_UNSTIM_VS_POLYIC_TLR3_STIM_PERITONEAL_MACROPHAGE_UP	0.00323625	0.025207	0.503051	2.02663	0	67
GO_CELL_PROLIFERATION_IN_FOREBRAIN	0.00461894	0.025207	0.708837	2.02496	1	15
V$NFKAPPAB65_01	0.003861	0.025207	0.445413	2.02435	0	129
GO_NEUTRAL_AMINO_ACID_TRANSMEMBRANE_TRANSPORTER_ACTIVITY	0.00234192	0.025207	0.696962	2.02374	0	16
PDGF_UP.V1_UP	0.00377358	0.025207	0.455342	2.02353	0	116
GSE19401_UNSTIM_VS_PAM2CSK4_STIM_FOLLICULAR_DC_UP	0.00403226	0.025207	0.440576	2.02296	0	138
GSE2706_UNSTIM_VS_8H_R848_DC_DN	0.00362319	0.025207	0.455186	2.02182	0	109
GSE18791_CTRL_VS_NEWCASTLE_VIRUS_DC_14H_DN	0.00334448	0.025207	0.469096	2.02086	0	92
GO_REGULATION_OF_SMOOTHENED_SIGNALING_PATHWAY	0.00271003	0.025207	0.549427	2.02024	0	38
MAYBURD_RESPONSE_TO_L663536_UP	0.00246914	0.025207	0.624084	2.02009	0	24
GSE37532_VISCERAL_ADIPOSE_TISSUE_VS_LN_DERIVED_PPARG_KO_TREG_CD4_TCELL_DN	0.00340136	0.025207	0.468363	2.01785	0	93
NEMETH_INFLAMMATORY_RESPONSE_LPS_UP	0.00316456	0.025207	0.49005	2.01719	0	70
BONCI_TARGETS_OF_MIR15A_AND_MIR16_1	0.00308642	0.025207	0.49886	2.01553	0	60
ST_INTERLEUKIN_4_PATHWAY	0.00235849	0.025207	0.667197	2.01541	0	19
BIOCARTA_MCM_PATHWAY	0.00468384	0.025207	0.683738	2.01522	1	17
GCM_ZNF198	0.003663	0.025207	0.452208	2.01384	0	110
RUIZ_TNC_TARGETS_DN	0.00362319	0.025207	0.453332	2.01359	0	109
BHAT_ESR1_TARGETS_VIA_AKT1_UP	0.00452489	0.025207	0.423725	2.01357	0	167
SAKAI_CHRONIC_HEPATITIS_VS_LIVER_CANCER_DN	0.00234192	0.025207	0.692693	2.01134	0	16
BILANGES_SERUM_SENSITIVE_VIA_TSC2	0.0025974	0.025207	0.59052	2.01083	0	30
OSWALD_HEMATOPOIETIC_STEM_CELL_IN_COLLAGEN_GEL_UP	0.00436681	0.025207	0.434457	2.00948	0	148
SIMBULAN_UV_RESPONSE_IMMORTALIZED_DN	0.00468384	0.025207	0.681717	2.00926	1	17
GO_CALMODULIN_BINDING	0.00344828	0.025207	0.459806	2.00839	0	96
ATACTGT,MIR-144	0.00416667	0.025207	0.441554	2.00779	0	134
CHICAS_RB1_TARGETS_SENESCENT	0.00657895	0.030711	0.385537	2.00647	0	389
SENESE_HDAC1_TARGETS_UP	0.0060241	0.0291518	0.393295	2.00616	0	325
GO_RESPONSE_TO_IONIZING_RADIATION	0.00377358	0.025207	0.45056	2.00614	0	113
JAZAERI_BREAST_CANCER_BRCA1_VS_BRCA2_DN	0.0025	0.025207	0.611896	2.00613	0	25
GO_NUCLEAR_PERIPHERY	0.00362319	0.025207	0.453056	2.00496	0	107
GO_PROTEIN_SERINE_THREONINE_KINASE_ACTIVITY	0.00625	0.0297483	0.392377	2.00458	0	331
GSE36009_WT_VS_NLRP10_KO_DC_DN	0.00454545	0.025207	0.421369	2.00319	0	166
KTGGYRSGAA_UNKNOWN	0.00310559	0.025207	0.4977	2.00317	0	62
GTACTGT,MIR-101	0.00465116	0.025207	0.42147	2.00236	0	179
GO_EMBRYONIC_PLACENTA_DEVELOPMENT	0.00277778	0.025207	0.517498	2.00106	0	47
GO_REGULATION_OF_CHROMATIN_ORGANIZATION	0.00371747	0.025207	0.44831	1.998	0	112
GO_RESPONSE_TO_UV	0.00358423	0.025207	0.452	1.99789	0	104
SCIAN_INVERSED_TARGETS_OF_TP53_AND_TP73_DN	0.00254453	0.025207	0.607505	1.99731	0	27
GSE21379_TFH_VS_NON_TFH_CD4_TCELL_DN	0.00308642	0.025207	0.494307	1.99713	0	60
PUJANA_XPRSS_INT_NETWORK	0.00452489	0.025207	0.421637	1.99695	0	163
GO_DNA_SECONDARY_STRUCTURE_BINDING	0.00248756	0.025207	0.62822	1.99608	0	23
GSE21546_WT_VS_SAP1A_KO_AND_ELK1_KO_DP_THYMOCYTES_UP	0.00420168	0.025207	0.436596	1.99583	0	140
GSE13547_CTRL_VS_ANTI_IGM_STIM_BCELL_12H_UP	0.00452489	0.025207	0.421995	1.99407	0	159
GSE15750_DAY6_VS_DAY10_EFF_CD8_TCELL_DN	0.00421941	0.025207	0.433892	1.9938	0	144
GSE22033_UNTREATED_VS_ROSIGLITAZONE_TREATED_MEF_DN	0.00393701	0.025207	0.444682	1.99375	0	126
GSE21063_CTRL_VS_ANTI_IGM_STIM_BCELL_8H_UP	0.00334448	0.025207	0.462628	1.993	0	92
ZHOU_INFLAMMATORY_RESPONSE_FIMA_UP	0.00483092	0.025207	0.410381	1.99142	0	215
GSE6674_CPG_VS_PL2_3_STIM_BCELL_DN	0.00444444	0.025207	0.41898	1.98894	0	164
GO_PROTEIN_LOCALIZATION_TO_CENTROSOME	0.00461894	0.025207	0.696211	1.98888	1	15
GSE21546_UNSTIM_VS_ANTI_CD3_STIM_ELK1_KO_DP_THYMOCYTES_DN	0.00320513	0.025207	0.467789	1.98876	0	82
GCM_MAP4K4	0.00436681	0.025207	0.429748	1.9877	0	148
RELA_DN.V1_UP	0.00316456	0.025207	0.482862	1.9876	0	70
GO_MICROTUBULE_CYTOSKELETON_ORGANIZATION	0.00505051	0.0257292	0.399705	1.98661	0	252
V$E2F_Q6_01	0.00444444	0.025207	0.411594	1.98286	0	182
GO_PERICENTRIOLAR_MATERIAL	0.00471698	0.025207	0.664451	1.98259	1	18
AMIT_DELAYED_EARLY_GENES	0.00234192	0.025207	0.682749	1.98247	0	16
GO_MULTICELLULAR_ORGANISM_GROWTH	0.00303951	0.025207	0.497746	1.98187	0	56
SENESE_HDAC3_TARGETS_UP	0.00628931	0.0298714	0.386292	1.9808	0	341
GSE3982_CTRL_VS_LPS_4H_MAC_DN	0.00444444	0.025207	0.429098	1.98021	0	149
GCM_SUFU	0.00315457	0.025207	0.477297	1.97987	0	73
BIOCARTA_ETS_PATHWAY	0.00234192	0.025207	0.681766	1.97961	0	16
V$DR3_Q4	0.00309598	0.025207	0.476528	1.97904	0	74
GSE8621_UNSTIM_VS_LPS_PRIMED_AND_LPS_STIM_MACROPHAGE_DN	0.004329	0.025207	0.427997	1.97855	0	147
CHICAS_RB1_TARGETS_GROWING	0.0044843	0.025207	0.421815	1.97816	0	154
GO_G1_S_TRANSITION_OF_MITOTIC_CELL_CYCLE	0.00352113	0.025207	0.450977	1.97672	0	98
GO_CELL_CYCLE_G1_S_PHASE_TRANSITION	0.00352113	0.025207	0.450977	1.97672	0	98
GSE16385_ROSIGLITAZONE_IL4_VS_IFNG_TNF_STIM_MACROPHAGE_UP	0.00458716	0.025207	0.420345	1.97595	0	157
GO_PROTEIN_AUTOPHOSPHORYLATION	0.00392157	0.025207	0.434771	1.97574	0	130
GO_RESPONSE_TO_X_RAY	0.00246914	0.025207	0.610044	1.97465	0	24
GSE5503_MLN_DC_VS_PLN_DC_ACTIVATED_ALLOGENIC_TCELL_DN	0.00421941	0.025207	0.430643	1.97433	0	142
MODULE_397	0.00340136	0.025207	0.458222	1.97416	0	93
GO_TRANSCRIPTION_FACTOR_ACTIVITY_PROTEIN_BINDING	0.00775194	0.0346327	0.375855	1.97346	0	430
TGAATGT,MIR-181A,MIR-181B,MIR-181C,MIR-181D	0.00613497	0.0295169	0.386513	1.97239	0	327
AACTGAC,MIR-223	0.00309598	0.025207	0.474911	1.97233	0	74
MORF_PDPK1	0.00277778	0.025207	0.510062	1.97231	0	47
GSE34392_ST2_KO_VS_WT_DAY8_LCMV_EFFECTOR_CD8_TCELL_DN	0.00408163	0.025207	0.44618	1.97122	0	120
GO_POLYUBIQUITIN_BINDING	0.00271003	0.025207	0.535574	1.9693	0	38
SONG_TARGETS_OF_IE86_CMV_PROTEIN	0.00309598	0.025207	0.493215	1.96901	0	58
MORF_RFC5	0.00303951	0.025207	0.494441	1.96871	0	56
VANTVEER_BREAST_CANCER_POOR_PROGNOSIS	0.00253165	0.025207	0.562905	1.96839	0	32
GO_MICROTUBULE_POLYMERIZATION_OR_DEPOLYMERIZATION	0.00253165	0.025207	0.562556	1.96717	0	32
GO_NUCLEAR_BODY	0.00558659	0.0274329	0.388378	1.96693	0	305
FUJII_YBX1_TARGETS_DN	0.00444444	0.025207	0.408212	1.96657	0	182
OSADA_ASCL1_TARGETS_UP	0.00484262	0.025207	0.634324	1.9664	1	21
MORF_ATRX	0.00456621	0.025207	0.41486	1.96621	0	165
GSE46606_IRF4MID_VS_WT_CD40L_IL2_IL5_DAY1_STIMULATED_BCELL_DN	0.004	0.025207	0.442592	1.9661	0	124
DAUER_STAT3_TARGETS_UP	0.00254453	0.025207	0.597848	1.96556	0	27
WORSCHECH_TUMOR_REJECTION_UP	0.004914	0.0253535	0.624272	1.96523	1	22
GSE12392_IFNAR_KO_VS_IFNB_KO_CD8_NEG_SPLEEN_DC_UP	0.004329	0.025207	0.424543	1.96258	0	147
MORF_RBBP8	0.00420168	0.025207	0.429272	1.96235	0	140
ACCAAAG,MIR-9	0.00609756	0.0294219	0.379471	1.9619	0	343
BIOCARTA_MAPK_PATHWAY	0.00314465	0.025207	0.468394	1.96175	0	76
PID_TNF_PATHWAY	0.00269542	0.025207	0.526208	1.96131	0	40
GO_MICROTUBULE_ORGANIZING_CENTER_ORGANIZATION	0.003125	0.025207	0.471667	1.96056	0	75
GSE21033_3H_VS_24H_POLYIC_STIM_DC_UP	0.00398406	0.025207	0.444529	1.96045	0	118
GSE22601_IMMATURE_CD4_SINGLE_POSITIVE_VS_DOUBLE_POSITIVE_THYMOCYTE_DN	0.00460829	0.025207	0.416343	1.96041	0	158
KEGG_CYTOSOLIC_DNA_SENSING_PATHWAY	0.00265252	0.025207	0.543184	1.96029	0	36
TGACAGNY_V$MEIS1_01	0.00877193	0.0375072	0.371436	1.96008	0	478
KONG_E2F3_TARGETS	0.00334448	0.025207	0.454866	1.95956	0	92
GCAAAAA,MIR-129	0.00401606	0.025207	0.437892	1.95916	0	125
BROWNE_HCMV_INFECTION_14HR_UP	0.00421941	0.025207	0.433405	1.95871	0	133
GCM_DFFA	0.00398406	0.025207	0.443946	1.95788	0	118
KEGG_CYTOKINE_CYTOKINE_RECEPTOR_INTERACTION	0.00321543	0.025207	0.48603	1.95777	0	64
PID_HES_HEY_PATHWAY	0.0027027	0.025207	0.550733	1.95727	0	35
SHEDDEN_LUNG_CANCER_GOOD_SURVIVAL_A5	0.00277778	0.025207	0.505839	1.95598	0	47
GSE40666_WT_VS_STAT1_KO_CD8_TCELL_WITH_IFNA_STIM_90MIN_DN	0.0044843	0.025207	0.416611	1.95376	0	154
PEREZ_TP53_AND_TP63_TARGETS	0.00330033	0.025207	0.459841	1.9525	0	83
GSE18791_UNSTIM_VS_NEWCATSLE_VIRUS_DC_2H_DN	0.00344828	0.025207	0.452848	1.95236	0	94
GO_PROTEIN_KINASE_ACTIVITY	0.0078125	0.0347072	0.374399	1.952	0	418
GO_TUMOR_NECROSIS_FACTOR_RECEPTOR_SUPERFAMILY_BINDING	0.0025974	0.025207	0.571576	1.94632	0	30
GSE7768_OVA_ALONE_VS_OVA_WITH_LPS_IMMUNIZED_MOUSE_WHOLE_SPLEEN_6H_DN	0.00408163	0.025207	0.440471	1.94599	0	120
GSE37605_FOXP3_FUSION_GFP_VS_IRES_GFP_TREG_NOD_DN	0.00364964	0.025207	0.439288	1.94571	0	106
MTOR_UP.N4.V1_UP	0.00452489	0.025207	0.411598	1.94494	0	159
GO_HISTONE_BINDING	0.00444444	0.025207	0.421386	1.94462	0	149
GCACTTT,MIR-17-5P,MIR-20A,MIR-106A,MIR-106B,MIR-20B,MIR-519D	0.00694444	0.0320247	0.372245	1.94341	0	404
GSE8835_CD4_VS_CD8_TCELL_UP	0.00458716	0.025207	0.413051	1.94166	0	157
GTTATAT,MIR-410	0.00307692	0.025207	0.479007	1.94136	0	61
GSE17721_CTRL_VS_PAM3CSK4_1H_BMDC_DN	0.00353357	0.025207	0.436163	1.9412	0	108
GSE15215_CD2_POS_VS_NEG_PDC_UP	0.00362319	0.025207	0.438216	1.93929	0	107
V$AP2GAMMA_01	0.00436681	0.025207	0.415671	1.93896	0	152
GO_NEGATIVE_REGULATION_OF_CHROMATIN_MODIFICATION	0.00265957	0.025207	0.531957	1.93868	0	37
MODULE_456	0.00315457	0.025207	0.467363	1.93867	0	73
NATSUME_RESPONSE_TO_INTERFERON_BETA_UP	0.00302115	0.025207	0.499557	1.9384	0	50
TGCACTT,MIR-519C,MIR-519B,MIR-519A	0.00552486	0.0272301	0.382477	1.9376	0	304
GSE6259_33D1_POS_VS_DEC205_POS_FLT3L_INDUCED_SPLENIC_DC_UP	0.00364964	0.025207	0.437417	1.93742	0	106
TAKEDA_TARGETS_OF_NUP98_HOXA9_FUSION_6HR_DN	0.004914	0.0253535	0.615401	1.93731	1	22
KEGG_ADIPOCYTOKINE_SIGNALING_PATHWAY	0.00274725	0.025207	0.518976	1.93681	0	41
GAGCTGG,MIR-337	0.00362319	0.025207	0.437439	1.93585	0	107
GSE9946_LISTERIA_INF_MATURE_VS_PROSTAGLANDINE2_TREATED_MATURE_DC_UP	0.00320513	0.025207	0.454819	1.93362	0	82
PLASARI_TGFB1_SIGNALING_VIA_NFIC_1HR_DN	0.0030581	0.025207	0.47878	1.93351	0	63
RIZ_ERYTHROID_DIFFERENTIATION	0.00321543	0.025207	0.479855	1.9329	0	64
MODULE_160	0.00461894	0.025207	0.675865	1.93076	1	15
GO_BONE_MINERALIZATION	0.00461894	0.025207	0.675733	1.93039	1	15
GO_TRANSCRIPTIONAL_REPRESSOR_ACTIVITY_RNA_POLYMERASE_II_ACTIVATING_TRANSCRIPTION_FACTOR_BINDING	0.00514139	0.0259542	0.572019	1.93022	1	29
REACTOME_ACTIVATION_OF_THE_PRE_REPLICATIVE_COMPLEX	0.00514139	0.0259542	0.571457	1.92832	1	29
GO_REGULATION_OF_FAT_CELL_DIFFERENTIATION	0.00277008	0.025207	0.502393	1.92771	0	46
MORF_CASP2	0.00318471	0.025207	0.477136	1.9274	0	65
GSE21546_WT_VS_SAP1A_KO_AND_ELK1_KO_DP_THYMOCYTES_DN	0.00393701	0.025207	0.429571	1.926	0	126
GNF2_MSH2	0.005	0.0255893	0.572545	1.92583	1	28
V$E2F_Q4_01	0.0046729	0.025207	0.401943	1.92556	0	188
V$E2F_01	0.00308642	0.025207	0.49616	1.92519	0	51
E2F1_UP.V1_UP	0.0042735	0.025207	0.418348	1.92456	0	146
GO_DNA_REPLICATION_INITIATION	0.00508906	0.025824	0.585239	1.9241	1	27
GSE18791_CTRL_VS_NEWCASTLE_VIRUS_DC_2H_DN	0.00352113	0.025207	0.438933	1.92393	0	98
GSE6674_CPG_VS_CPG_AND_ANTI_IGM_STIM_BCELL_DN	0.0045045	0.025207	0.415378	1.9215	0	150
MODULE_97	0.00320513	0.025207	0.454142	1.921	0	81
GSE31082_DP_VS_CD8_SP_THYMOCYTE_UP	0.00473934	0.025207	0.406326	1.92007	0	174
GSE32986_CURDLAN_LOWDOSE_VS_CURDLAN_HIGHDOSE_STIM_DC_DN	0.00416667	0.025207	0.422226	1.9199	0	134
GSE13485_DAY7_VS_DAY21_YF17D_VACCINE_PBMC_UP	0.00436681	0.025207	0.415024	1.91959	0	148
GYORFFY_MITOXANTRONE_RESISTANCE	0.00530504	0.0264608	0.540743	1.91899	1	34
BILD_CTNNB1_ONCOGENIC_SIGNATURE	0.00308642	0.025207	0.474822	1.91841	0	60
SIG_IL4RECEPTOR_IN_B_LYPHOCYTES	0.0025974	0.025207	0.587926	1.91774	0	26
HALLMARK_E2F_TARGETS	0.00473934	0.025207	0.398054	1.91754	0	198
ZHOU_CELL_CYCLE_GENES_IN_IR_RESPONSE_6HR	0.00314465	0.025207	0.457585	1.91648	0	76
GSE14769_UNSTIM_VS_240MIN_LPS_BMDM_DN	0.00452489	0.025207	0.404359	1.91512	0	163
GO_NEUTRAL_AMINO_ACID_TRANSPORT	0.00702576	0.0322103	0.64974	1.91502	2	17
GNF2_SMC4L1	0.0033557	0.025207	0.449944	1.914	0	84
GSE14308_TH17_VS_NATURAL_TREG_DN	0.00420168	0.025207	0.418528	1.91324	0	140
GSE19401_UNSTIM_VS_RETINOIC_ACID_STIM_FOLLICULAR_DC_DN	0.00403226	0.025207	0.416633	1.91302	0	138
GSE38304_MYC_NEG_VS_POS_GC_BCELL_UP	0.00421941	0.025207	0.417137	1.91241	0	142
OZEN_MIR125B1_TARGETS	0.00484262	0.025207	0.616883	1.91233	1	21
GCM_UBE2N	0.00436681	0.025207	0.413274	1.9115	0	148
MULLIGHAN_NPM1_MUTATED_SIGNATURE_2_UP	0.00357143	0.025207	0.435511	1.91079	0	100
GO_TRANSCRIPTIONAL_ACTIVATOR_ACTIVITY_RNA_POLYMERASE_II_CORE_PROMOTER_PROXIMAL_REGION_SEQUENCE_SPECIFIC_BINDING	0.00380228	0.025207	0.430285	1.90978	0	114
BIOCARTA_DEATH_PATHWAY	0.0025974	0.025207	0.560704	1.9093	0	30
GO_CELLULAR_RESPONSE_TO_INTERLEUKIN_1	0.00265957	0.025207	0.523874	1.90922	0	37
GO_UBIQUITIN_LIKE_PROTEIN_SPECIFIC_PROTEASE_ACTIVITY	0.00332226	0.025207	0.448169	1.90843	0	85
GSE22033_UNTREATED_VS_MRL24_TREATED_MEF_DN	0.00420168	0.025207	0.423095	1.90773	0	132
GSE13485_CTRL_VS_DAY21_YF17D_VACCINE_PBMC_UP	0.00454545	0.025207	0.401205	1.90733	0	166
PUJANA_BREAST_CANCER_WITH_BRCA1_MUTATED_UP	0.00301205	0.025207	0.480328	1.90711	0	54
MARKEY_RB1_CHRONIC_LOF_UP	0.00321543	0.025207	0.452992	1.9067	0	80
PRAMOONJAGO_SOX4_TARGETS_UP	0.00269542	0.025207	0.514864	1.90665	0	39
GSE13547_CTRL_VS_ANTI_IGM_STIM_BCELL_2H_UP	0.00420168	0.025207	0.41706	1.90653	0	140
GSE17974_0.5H_VS_72H_IL4_AND_ANTI_IL12_ACT_CD4_TCELL_UP	0.00454545	0.025207	0.401023	1.90646	0	166
GO_REGULATION_OF_OSTEOCLAST_DIFFERENTIATION	0.00259067	0.025207	0.540842	1.90565	0	33
GO_BAF_TYPE_COMPLEX	0.00478469	0.025207	0.623762	1.90525	1	20
OKUMURA_INFLAMMATORY_RESPONSE_LPS	0.00392157	0.025207	0.428739	1.90517	0	121
GSE21379_TFH_VS_NON_TFH_CD4_TCELL_UP	0.00406504	0.025207	0.419296	1.90513	0	131
GSE18893_TCONV_VS_TREG_2H_TNF_STIM_DN	0.00440529	0.025207	0.407164	1.90292	0	153
MARTORIATI_MDM4_TARGETS_FETAL_LIVER_DN	0.00680272	0.0315128	0.365031	1.9029	0	394
GO_MICROTUBULE_POLYMERIZATION	0.00497512	0.0255404	0.598881	1.90287	1	23
GO_MICROTUBULE_ANCHORING	0.00702576	0.0322103	0.654358	1.90003	2	16
DORN_ADENOVIRUS_INFECTION_32HR_DN	0.0025974	0.025207	0.582322	1.89946	0	26
HUANG_FOXA2_TARGETS_UP	0.00253165	0.025207	0.543187	1.89944	0	32
PID_EPO_PATHWAY	0.0025974	0.025207	0.557699	1.89907	0	30
GSE37605_TREG_VS_TCONV_NOD_FOXP3_FUSION_GFP_UP	0.00309598	0.025207	0.457122	1.89845	0	74
V$AP2_Q6_01	0.0047619	0.025207	0.400676	1.89712	0	173
GSE14350_TREG_VS_TEFF_UP	0.00454545	0.025207	0.398946	1.89659	0	166
GNF2_MCM5	0.00308642	0.025207	0.469384	1.89644	0	60
PHONG_TNF_RESPONSE_VIA_P38_COMPLETE	0.00465116	0.025207	0.399173	1.89643	0	179
TTGCACT,MIR-130A,MIR-301,MIR-130B	0.00558659	0.0274329	0.376803	1.89629	0	283
GSE45365_NK_CELL_VS_BCELL_UP	0.00444444	0.025207	0.407503	1.89604	0	151
MODULE_182	0.00330033	0.025207	0.446416	1.8955	0	83
GO_NUCLEAR_MATRIX	0.0033557	0.025207	0.445554	1.89533	0	84
GSE3920_IFNA_VS_IFNB_TREATED_ENDOTHELIAL_CELL_DN	0.00344828	0.025207	0.439601	1.89525	0	94
GSE41867_NAIVE_VS_DAY15_LCMV_EFFECTOR_CD8_TCELL_DN	0.00471698	0.025207	0.400114	1.89509	0	172
GSE2405_HEAT_KILLED_LYSATE_VS_LIVE_A_PHAGOCYTOPHILUM_STIM_NEUTROPHIL_24H_DN	0.00406504	0.025207	0.412885	1.89495	0	137
AMIT_EGF_RESPONSE_40_HELA	0.00530504	0.0264608	0.533842	1.8945	1	34
PUJANA_BRCA_CENTERED_NETWORK	0.00389105	0.025207	0.429338	1.8944	0	115
GSE19888_ADENOSINE_A3R_ACT_VS_TCELL_MEMBRANES_ACT_IN_MAST_CELL_DN	0.0041841	0.025207	0.410254	1.89395	0	145
GO_REGULATION_OF_POSTTRANSCRIPTIONAL_GENE_SILENCING	0.00461894	0.025207	0.662877	1.89366	1	15
GO_REGULATION_OF_GENE_SILENCING_BY_RNA	0.00461894	0.025207	0.662877	1.89366	1	15
KRAS.BREAST_UP.V1_UP	0.005	0.0255893	0.562947	1.89355	1	28
SANA_TNF_SIGNALING_UP	0.00284091	0.025207	0.489994	1.89329	0	48
GSE4984_LPS_VS_VEHICLE_CTRL_TREATED_DC_DN	0.0045045	0.025207	0.409128	1.89259	0	150
GSE41867_DAY6_VS_DAY15_LCMV_ARMSTRONG_EFFECTOR_CD8_TCELL_UP	0.00310559	0.025207	0.450412	1.89248	0	77
CTTGTAT,MIR-381	0.00421941	0.025207	0.411839	1.89246	0	144
GO_NEGATIVE_REGULATION_OF_CELL_CYCLE_G2_M_PHASE_TRANSITION	0.00484262	0.025207	0.610411	1.89226	1	21
V$E2F_03	0.00478469	0.025207	0.394632	1.89221	0	193
EIF4E_DN	0.00310559	0.025207	0.450298	1.89199	0	77
GSE27291_0H_VS_7D_STIM_GAMMADELTA_TCELL_DN	0.00440529	0.025207	0.404757	1.89167	0	153
REACTOME_ACTIVATION_OF_ATR_IN_RESPONSE_TO_REPLICATION_STRESS	0.0027027	0.025207	0.532236	1.89154	0	35
GSE2706_UNSTIM_VS_8H_LPS_DC_DN	0.004	0.025207	0.42572	1.89115	0	124
GO_NEGATIVE_REGULATION_OF_PROTEIN_COMPLEX_DISASSEMBLY	0.00420168	0.025207	0.4193	1.89062	0	132
GSE13306_LAMINA_PROPRIA_VS_SPLEEN_TREG_UP	0.00436681	0.025207	0.405277	1.89047	0	152
GSE10147_IL3_VS_IL3_AND_HIVP17_STIM_PDC_UP	0.00403226	0.025207	0.411678	1.89027	0	138
ST_GA13_PATHWAY	0.00779221	0.0346401	0.579165	1.88916	2	26
REACTOME_YAP1_AND_WWTR1_TAZ_STIMULATED_GENE_EXPRESSION	0.00702576	0.0322103	0.650516	1.88887	2	16
GSE19374_UNINF_VS_LISTERIA_INFECTED_MACROPHAGE_DN	0.00393701	0.025207	0.424006	1.88864	0	123
GO_PCG_PROTEIN_COMPLEX	0.00269542	0.025207	0.509982	1.88857	0	39
GCM_HBP1	0.00318471	0.025207	0.467464	1.88833	0	65
GO_NON_MEMBRANE_SPANNING_PROTEIN_TYROSINE_KINASE_ACTIVITY	0.0025974	0.025207	0.55454	1.88831	0	30
GO_PROTEIN_KINASE_A_BINDING	0.0025974	0.025207	0.554492	1.88814	0	30
REACTOME_RORA_ACTIVATES_CIRCADIAN_EXPRESSION	0.00702576	0.0322103	0.640602	1.88808	2	17
V$AP2_Q6	0.0046729	0.025207	0.399	1.88752	0	176
ATGTTAA,MIR-302C	0.00452489	0.025207	0.397158	1.88732	0	167
CAGTGTT,MIR-141,MIR-200A	0.00485437	0.025207	0.389755	1.88732	0	217
GO_SWI_SNF_SUPERFAMILY_TYPE_COMPLEX	0.0030581	0.025207	0.46733	1.88727	0	63
IL15_UP.V1_UP	0.00357143	0.025207	0.42832	1.88578	0	101
GSE3920_IFNA_VS_IFNG_TREATED_FIBROBLAST_UP	0.00392157	0.025207	0.424318	1.88553	0	121
GO_CELLULAR_RESPONSE_TO_UV	0.00303951	0.025207	0.473534	1.88546	0	56
GO_T_CELL_DIFFERENTIATION_INVOLVED_IN_IMMUNE_RESPONSE	0.00692841	0.0319618	0.659747	1.88472	2	15
AAAGGGA,MIR-204,MIR-211	0.00460829	0.025207	0.400388	1.8842	0	162
GSE26343_WT_VS_NFAT5_KO_MACROPHAGE_DN	0.00420168	0.025207	0.417847	1.88407	0	132
SCHEIDEREIT_IKK_TARGETS	0.00702576	0.0322103	0.648826	1.88397	2	16
TTTGCAC,MIR-19A,MIR-19B	0.00625	0.0297483	0.364176	1.88285	0	345
GO_THIOL_DEPENDENT_UBIQUITIN_SPECIFIC_PROTEASE_ACTIVITY	0.00318471	0.025207	0.465864	1.88187	0	65
WARTERS_IR_RESPONSE_5GY	0.00508906	0.025824	0.572153	1.88108	1	27
GO_RNA_POLYMERASE_II_ACTIVATING_TRANSCRIPTION_FACTOR_BINDING	0.00726392	0.0330408	0.60676	1.88095	2	21
PID_SMAD2_3NUCLEAR_PATHWAY	0.0030581	0.025207	0.465619	1.88036	0	63
MORF_JAK3	0.00297619	0.025207	0.478954	1.87965	0	52
GO_EYE_MORPHOGENESIS	0.00297619	0.025207	0.486614	1.87946	0	49
GO_PROTEIN_TYROSINE_KINASE_ACTIVITY	0.00334448	0.025207	0.437126	1.87942	0	90
GO_MRNA_SPLICE_SITE_SELECTION	0.00746269	0.0337149	0.591206	1.87848	2	23
LUI_THYROID_CANCER_CLUSTER_1	0.00269542	0.025207	0.503826	1.87788	0	40
GSE11924_TFH_VS_TH2_CD4_TCELL_UP	0.0047619	0.025207	0.396505	1.87738	0	173
AAGCACA,MIR-218	0.00485437	0.025207	0.379072	1.87733	0	242
GO_RESPONSE_TO_DSRNA	0.00283286	0.025207	0.503756	1.87726	0	42
GSE24026_PD1_LIGATION_VS_CTRL_IN_ACT_TCELL_LINE_DN	0.00452489	0.025207	0.394856	1.87638	0	167
GSE15750_DAY6_VS_DAY10_TRAF6KO_EFF_CD8_TCELL_UP	0.00471698	0.025207	0.395964	1.87544	0	172
GO_EMBRYONIC_ORGAN_DEVELOPMENT	0.00483092	0.025207	0.391666	1.87517	0	191
GSE16266_CTRL_VS_LPS_STIM_MEF_UP	0.00420168	0.025207	0.408885	1.87419	0	143
GSE12845_IGD_NEG_BLOOD_VS_NAIVE_TONSIL_BCELL_DN	0.00444444	0.025207	0.406065	1.87392	0	149
FINETTI_BREAST_CANCERS_KINOME_GRAY	0.00692841	0.0319618	0.655731	1.87325	2	15
GO_PROTEIN_KINASE_B_SIGNALING	0.00702576	0.0322103	0.635534	1.87314	2	17
GSE4748_CTRL_VS_LPS_STIM_DC_3H_UP	0.00393701	0.025207	0.417774	1.8731	0	126
DUTTA_APOPTOSIS_VIA_NFKB	0.0075	0.0338376	0.556722	1.87261	2	28
PID_VEGFR1_PATHWAY	0.00726392	0.0330408	0.603792	1.87174	2	21
GSE32986_GMCSF_VS_GMCSF_AND_CURDLAN_HIGHDOSE_STIM_DC_DN	0.00416667	0.025207	0.411552	1.87137	0	134
GSE20484_MCSG_VS_CXCL4_MONOCYTE_DERIVED_MACROPHAGE_DN	0.00436681	0.025207	0.401152	1.87123	0	152
PID_IL6_7_PATHWAY	0.00265957	0.025207	0.513265	1.87056	0	37
GO_T_CELL_ACTIVATION_INVOLVED_IN_IMMUNE_RESPONSE	0.00740741	0.0335447	0.577724	1.87003	2	24
GSE15139_GMCSF_TREATED_VS_UNTREATED_NEUTROPHILS_DN	0.00465116	0.025207	0.392931	1.86985	0	178
AGGCACT,MIR-515-3P	0.00310559	0.025207	0.464575	1.86984	0	62
GO_EMBRYONIC_CAMERA_TYPE_EYE_DEVELOPMENT	0.00702576	0.0322103	0.634371	1.86972	2	17
GSE7348_UNSTIM_VS_LPS_STIM_MACROPHAGE_DN	0.00377358	0.025207	0.41985	1.8694	0	113
GTTAAAG,MIR-302B	0.00277008	0.025207	0.486966	1.86852	0	46
GSE22103_LPS_VS_GMCSF_AND_IFNG_STIM_NEUTROPHIL_DN	0.00452489	0.025207	0.394262	1.8673	0	163
KEGG_RIG_I_LIKE_RECEPTOR_SIGNALING_PATHWAY	0.00277778	0.025207	0.482889	1.86723	0	47
RODRIGUES_NTN1_TARGETS_DN	0.00320513	0.025207	0.441391	1.86706	0	81
GSE21546_ELK1_KO_VS_SAP1A_KO_AND_ELK1_KO_DP_THYMOCYTES_DN	0.00456621	0.025207	0.396199	1.8666	0	161
GSE360_L_MAJOR_VS_M_TUBERCULOSIS_MAC_UP	0.00357143	0.025207	0.423935	1.86648	0	101
GO_MICROTUBULE_END	0.00471698	0.025207	0.617584	1.86554	1	19
GO_RHO_GUANYL_NUCLEOTIDE_EXCHANGE_FACTOR_ACTIVITY	0.00280112	0.025207	0.492828	1.86455	0	43
GSE39556_CD8A_DC_VS_NK_CELL_MOUSE_3H_POST_POLYIC_INJ_UP	0.00446429	0.025207	0.386764	1.86318	0	186
GO_TRANSCRIPTIONAL_REPRESSOR_ACTIVITY_RNA_POLYMERASE_II_TRANSCRIPTION_FACTOR_BINDING	0.00302115	0.025207	0.480154	1.86311	0	50
GSE45365_NK_CELL_VS_BCELL_MCMV_INFECTION_DN	0.00469484	0.025207	0.398342	1.86239	0	156
PID_IL2_PI3K_PATHWAY	0.00254453	0.025207	0.538088	1.862	0	31
GSE40274_FOXP3_VS_FOXP3_AND_HELIOS_TRANSDUCED_ACTIVATED_CD4_TCELL_DN	0.003663	0.025207	0.418061	1.86177	0	110
BEGUM_TARGETS_OF_PAX3_FOXO1_FUSION_DN	0.00923788	0.038272	0.651324	1.86065	3	15
GNF2_CENPF	0.00307692	0.025207	0.459094	1.86065	0	61
GSE12003_MIR223_KO_VS_WT_BM_PROGENITOR_4D_CULTURE_UP	0.0044843	0.025207	0.396684	1.86031	0	154
GO_REGULATION_OF_EMBRYONIC_DEVELOPMENT	0.00310559	0.025207	0.463975	1.85993	0	59
KEGG_PROSTATE_CANCER	0.00323625	0.025207	0.461277	1.85834	0	67
GO_IN_UTERO_EMBRYONIC_DEVELOPMENT	0.00471698	0.025207	0.384492	1.85802	0	202
GO_PEPTIDYL_TYROSINE_MODIFICATION	0.00340136	0.025207	0.431214	1.8578	0	93
GSE14415_NATURAL_TREG_VS_TCONV_DN	0.0041841	0.025207	0.402159	1.85658	0	145
BASSO_CD40_SIGNALING_UP	0.00320513	0.025207	0.438833	1.85624	0	81
DORN_ADENOVIRUS_INFECTION_24HR_DN	0.0075	0.0338376	0.551634	1.8555	2	28
PLASARI_TGFB1_TARGETS_1HR_UP	0.00936768	0.0384987	0.629506	1.85538	3	17
GO_TRANSCRIPTION_FROM_RNA_POLYMERASE_II_PROMOTER	0.00877193	0.0375072	0.351402	1.85437	0	478
REACTOME_KINESINS	0.00717703	0.0327461	0.607016	1.8541	2	20
GSE27434_WT_VS_DNMT1_KO_TREG_DN	0.00420168	0.025207	0.404471	1.85395	0	143
GSE39820_CTRL_VS_TGFBETA1_IL6_IL23A_CD4_TCELL_UP	0.00458716	0.025207	0.392277	1.8538	0	160
IGARASHI_ATF4_TARGETS_DN	0.00308642	0.025207	0.458787	1.85362	0	60
GO_RHYTHMIC_PROCESS	0.00452489	0.025207	0.39453	1.85249	0	155
ZHONG_RESPONSE_TO_AZACITIDINE_AND_TSA_UP	0.00401606	0.025207	0.413172	1.85141	0	127
MORF_CCNF	0.00315457	0.025207	0.44624	1.85105	0	73
BIOCARTA_IL6_PATHWAY	0.00717703	0.0327461	0.605958	1.85087	2	20
GROSS_HYPOXIA_VIA_ELK3_DN	0.00357143	0.025207	0.418706	1.85073	0	102
YWATTWNNRGCT_UNKNOWN	0.00265957	0.025207	0.50763	1.85003	0	37
GO_RAS_GUANYL_NUCLEOTIDE_EXCHANGE_FACTOR_ACTIVITY	0.003663	0.025207	0.415371	1.84979	0	110
FAELT_B_CLL_WITH_VH3_21_UP	0.00274725	0.025207	0.495511	1.84924	0	41
GSE41176_UNSTIM_VS_ANTI_IGM_STIM_BCELL_24H_DN	0.00465116	0.025207	0.390146	1.84907	0	168
BIOCARTA_HIVNEF_PATHWAY	0.00297619	0.025207	0.471155	1.84904	0	52
ALK_DN.V1_UP	0.00297619	0.025207	0.47112	1.84891	0	52
GRAHAM_CML_QUIESCENT_VS_NORMAL_DIVIDING_UP	0.00740741	0.0335447	0.571171	1.84882	2	24
GSE11924_TFH_VS_TH17_CD4_TCELL_UP	0.00456621	0.025207	0.389978	1.84828	0	165
MORF_RFC1	0.00357143	0.025207	0.421085	1.84749	0	100
GO_RECOMBINATIONAL_REPAIR	0.0031746	0.025207	0.456835	1.84715	0	66
GSE17301_ACD3_ACD28_VS_ACD3_ACD28_AND_IFNA5_STIM_CD8_TCELL_UP	0.00436681	0.025207	0.399108	1.84598	0	148
CROONQUIST_STROMAL_STIMULATION_UP	0.00740741	0.0335447	0.570222	1.84575	2	24
GO_SOMATIC_RECOMBINATION_OF_IMMUNOGLOBULIN_GENE_SEGMENTS	0.00471698	0.025207	0.618348	1.84503	1	18
GO_PEPTIDYL_LYSINE_METHYLATION	0.00297619	0.025207	0.470048	1.8447	0	52
GSE27786_LIN_NEG_VS_ERYTHROBLAST_DN	0.00334448	0.025207	0.428936	1.8442	0	90
KATSANOU_ELAVL1_TARGETS_DN	0.00330033	0.025207	0.43415	1.84341	0	83
GSE2197_IMMUNOSUPPRESSIVE_DNA_VS_UNTREATED_IN_DC_UP	0.00436681	0.025207	0.398551	1.8434	0	148
GSE17721_12H_VS_24H_LPS_BMDC_UP	0.00414938	0.025207	0.403949	1.84318	0	135
GO_REGULATION_OF_EPIDERMIS_DEVELOPMENT	0.0075	0.0338376	0.547767	1.84249	2	28
GSE25123_WT_VS_PPARG_KO_MACROPHAGE_IL4_AND_ROSIGLITAZONE_STIM_DN	0.0044843	0.025207	0.392882	1.84247	0	154
CHIARETTI_T_ALL_RELAPSE_PROGNOSIS	0.0117096	0.0456469	0.624947	1.84194	4	17
IVANOVSKA_MIR106B_TARGETS	0.00315457	0.025207	0.443954	1.84157	0	73
MORF_HEAB	0.00318471	0.025207	0.455842	1.84139	0	65
CTACTGT,MIR-199A	0.003861	0.025207	0.40511	1.84118	0	129
GO_POSITIVE_REGULATION_OF_HISTONE_METHYLATION	0.00779221	0.0346401	0.564256	1.84053	2	26
GCM_USP6	0.00303951	0.025207	0.462161	1.84018	0	56
GSE37605_NOD_VS_C57BL6_IRES_GFP_TREG_UP	0.00333333	0.025207	0.429948	1.84012	0	87
GSE5542_UNTREATED_VS_IFNA_TREATED_EPITHELIAL_CELLS_24H_UP	0.00458716	0.025207	0.39143	1.84002	0	157
LAIHO_COLORECTAL_CANCER_SERRATED_DN	0.00321543	0.025207	0.446274	1.83966	0	72
BROWNE_HCMV_INFECTION_10HR_UP	0.00315457	0.025207	0.443235	1.83858	0	73
GGCACTT,MIR-519E	0.00331126	0.025207	0.425516	1.8377	0	91
GSE31082_DN_VS_CD4_SP_THYMOCYTE_DN	0.00458716	0.025207	0.388821	1.83747	0	160
GSE19923_WT_VS_HEB_AND_E2A_KO_DP_THYMOCYTE_DN	0.00440529	0.025207	0.392992	1.83669	0	153
GSE10240_CTRL_VS_IL17_AND_IL22_STIM_PRIMARY_BRONCHIAL_EPITHELIAL_CELLS_DN	0.0042735	0.025207	0.399159	1.83629	0	146
GO_ACTIVATING_TRANSCRIPTION_FACTOR_BINDING	0.00265252	0.025207	0.508762	1.83607	0	36
CTATGCA,MIR-153	0.00444444	0.025207	0.397845	1.83598	0	149
GSE17721_PAM3CSK4_VS_GADIQUIMOD_1H_BMDC_UP	0.00357143	0.025207	0.417004	1.83596	0	101
GO_EMBRYO_DEVELOPMENT_ENDING_IN_BIRTH_OR_EGG_HATCHING	0.0060241	0.0291518	0.359986	1.83448	0	324
GO_RESPONSE_TO_INTERLEUKIN_1	0.00297619	0.025207	0.467247	1.8337	0	52
GSE22886_NAIVE_TCELL_VS_NKCELL_DN	0.00444444	0.025207	0.394078	1.83358	0	151
CACCAGC,MIR-138	0.00444444	0.025207	0.397181	1.83292	0	149
MODULE_197	0.00421941	0.025207	0.399794	1.8329	0	142
GO_POSITIVE_REGULATION_OF_NEURON_PROJECTION_DEVELOPMENT	0.00403226	0.025207	0.399134	1.83267	0	138
REACTOME_TRAF6_MEDIATED_IRF7_ACTIVATION	0.0117096	0.0456469	0.621775	1.83259	4	17
V$TCF1P_Q6	0.0044843	0.025207	0.390668	1.83209	0	154
GO_PML_BODY	0.0033557	0.025207	0.430612	1.83177	0	84
REACTOME_IL_RECEPTOR_SHC_SIGNALING	0.00471698	0.025207	0.606119	1.83091	1	19
GSE23505_UNTREATED_VS_4DAY_IL6_IL1_IL23_TREATED_CD4_TCELL_UP	0.00452489	0.025207	0.386554	1.83079	0	163
GO_SISTER_CHROMATID_SEGREGATION	0.00469484	0.025207	0.391531	1.83055	0	156
GSE4590_SMALL_VS_VPREB_POS_LARGE_PRE_BCELL_UP	0.00409836	0.025207	0.39998	1.83049	0	139
GCM_GSTA4	0.00303951	0.025207	0.459283	1.82872	0	56
GO_HISTONE_LYSINE_N_METHYLTRANSFERASE_ACTIVITY	0.00771208	0.0345701	0.541941	1.82872	2	29
GSE20727_H2O2_VS_ROS_INHIBITOR_TREATED_DC_UP	0.004329	0.025207	0.395567	1.82863	0	147
MORF_BCL2	0.003663	0.025207	0.410575	1.82843	0	110
REACTOME_BMAL1_CLOCK_NPAS2_ACTIVATES_CIRCADIAN_EXPRESSION	0.00746269	0.0337149	0.575447	1.82841	2	23
PID_PDGFRA_PATHWAY	0.00471698	0.025207	0.612768	1.82838	1	18
GO_NEGATIVE_REGULATION_OF_FATTY_ACID_METABOLIC_PROCESS	0.00923788	0.038272	0.639982	1.82825	3	15
GSE7831_UNSTIM_VS_INFLUENZA_STIM_PDC_1H_DN	0.0042735	0.025207	0.397289	1.82768	0	146
GO_INTRINSIC_APOPTOTIC_SIGNALING_PATHWAY_IN_RESPONSE_TO_DNA_DAMAGE	0.00306748	0.025207	0.457293	1.82713	0	57
KEGG_MAPK_SIGNALING_PATHWAY	0.00469484	0.025207	0.39076	1.82695	0	156
GSE22935_UNSTIM_VS_24H_MBOVIS_BCG_STIM_MYD88_KO_MACROPHAGE_UP	0.00460829	0.025207	0.387921	1.82658	0	158
ZHANG_RESPONSE_TO_IKK_INHIBITOR_AND_TNF_DN	0.00315457	0.025207	0.440141	1.82575	0	73
V$CHOP_01	0.00444444	0.025207	0.392393	1.82574	0	151
GSE34515_CD16_POS_MONOCYTE_VS_DC_UP	0.00458716	0.025207	0.38836	1.8256	0	157
GSE37301_MULTIPOTENT_PROGENITOR_VS_LYMPHOID_PRIMED_MPP_DN	0.00392157	0.025207	0.410688	1.82496	0	121
GO_TRANSCRIPTIONAL_REPRESSOR_ACTIVITY_RNA_POLYMERASE_II_CORE_PROMOTER_PROXIMAL_REGION_SEQUENCE_SPECIFIC_BINDING	0.0031746	0.025207	0.451116	1.82403	0	66
WONG_ADULT_TISSUE_STEM_MODULE	0.00641026	0.0300392	0.349941	1.82316	0	387
LEE_LIVER_CANCER_ACOX1_DN	0.00740741	0.0335447	0.563101	1.8227	2	24
GO_MICROTUBULE_NUCLEATION	0.00471698	0.025207	0.610577	1.82184	1	18
DORN_ADENOVIRUS_INFECTION_48HR_DN	0.005	0.0255893	0.555655	1.82174	1	25
GO_INTRINSIC_APOPTOTIC_SIGNALING_PATHWAY_IN_RESPONSE_TO_DNA_DAMAGE_BY_P53_CLASS_MEDIATOR	0.00779221	0.0346401	0.558333	1.82121	2	26
CHARAFE_BREAST_CANCER_LUMINAL_VS_BASAL_UP	0.00487805	0.025207	0.372024	1.82098	0	229
GO_NEGATIVE_REGULATION_OF_EXTRINSIC_APOPTOTIC_SIGNALING_PATHWAY	0.00301205	0.025207	0.458587	1.82078	0	54
GO_SOMATIC_DIVERSIFICATION_OF_IMMUNOGLOBULINS	0.005	0.0255893	0.555092	1.8199	1	25
GSE20366_EX_VIVO_VS_HOMEOSTATIC_CONVERSION_NAIVE_CD4_TCELL_UP	0.00420168	0.025207	0.39687	1.81912	0	143
PID_NFKAPPAB_ATYPICAL_PATHWAY	0.00923788	0.038272	0.636783	1.81911	3	15
MODULE_372	0.00471698	0.025207	0.602016	1.81851	1	19
REACTOME_E2F_MEDIATED_REGULATION_OF_DNA_REPLICATION	0.00518135	0.0260769	0.515968	1.81801	1	33
PRC2_EZH2_UP.V1_UP	0.00377358	0.025207	0.408283	1.8179	0	113
MODULE_358	0.00318471	0.025207	0.449955	1.8176	0	65
REACTOME_CIRCADIAN_REPRESSION_OF_EXPRESSION_BY_REV_ERBA	0.00923788	0.038272	0.636196	1.81744	3	15
GO_POSITIVE_REGULATION_OF_CHROMATIN_MODIFICATION	0.00310559	0.025207	0.451411	1.81686	0	62
GSE2706_UNSTIM_VS_8H_LPS_AND_R848_DC_DN	0.00377358	0.025207	0.408044	1.81684	0	113
HALLMARK_APICAL_SURFACE	0.00471698	0.025207	0.601406	1.81667	1	19
MORF_RAGE	0.00310559	0.025207	0.432281	1.81629	0	77
GO_REGULATION_OF_CHROMATIN_SILENCING	0.00471698	0.025207	0.608712	1.81628	1	18
GO_MITOTIC_SPINDLE_ORGANIZATION	0.00308642	0.025207	0.449242	1.81506	0	60
GO_SPROUTING_ANGIOGENESIS	0.00936768	0.0384987	0.624919	1.81455	3	16
GSE45365_WT_VS_IFNAR_KO_BCELL_MCMV_INFECTION_UP	0.00353357	0.025207	0.40734	1.81292	0	108
GSE30962_PRIMARY_VS_SECONDARY_ACUTE_LCMV_INF_CD8_TCELL_UP	0.00454545	0.025207	0.381247	1.81245	0	166
GCM_NCAM1	0.00371747	0.025207	0.406633	1.81226	0	112
GSE21033_1H_VS_12H_POLYIC_STIM_DC_DN	0.00357143	0.025207	0.413043	1.81221	0	100
ZHANG_RESPONSE_TO_CANTHARIDIN_UP	0.00923788	0.038272	0.634241	1.81185	3	15
GSE7348_UNSTIM_VS_TOLERIZED_AND_LPS_STIM_MACROPHAGE_UP	0.00420168	0.025207	0.396048	1.81047	0	140
ACTGTGA,MIR-27A,MIR-27B	0.00581395	0.0283303	0.356279	1.81011	0	312
KRIEG_HYPOXIA_VIA_KDM3A	0.00519481	0.0261249	0.531546	1.81001	1	30
GSE16385_ROSIGLITAZONE_IL4_VS_IL4_ALONE_STIM_MACROPHAGE_12H_UP	0.00456621	0.025207	0.381792	1.80949	0	165
KAN_RESPONSE_TO_ARSENIC_TRIOXIDE	0.00321543	0.025207	0.440335	1.8093	0	71
GSE43863_LY6C_INT_CXCR5POS_VS_LY6C_LOW_CXCR5NEG_EFFECTOR_CD4_TCELL_UP	0.00414938	0.025207	0.396514	1.80926	0	135
GO_MITOTIC_SISTER_CHROMATID_SEGREGATION	0.0033557	0.025207	0.425244	1.80893	0	84
GSE7764_IL15_TREATED_VS_CTRL_NK_CELL_24H_UP	0.00465116	0.025207	0.381787	1.80692	0	171
V$CREL_01	0.004329	0.025207	0.390817	1.80667	0	147
GSE6259_33D1_POS_VS_DEC205_POS_SPLENIC_DC_UP	0.003861	0.025207	0.397292	1.80565	0	129
V$NKX22_01	0.00344828	0.025207	0.413325	1.80536	0	96
GSE37534_PIOGLITAZONE_VS_ROSIGLITAZONE_TREATED_CD4_TCELL_PPARG1_FOXP3_TRANSDUCED_DN	0.00352113	0.025207	0.411847	1.8052	0	98
GSE42724_NAIVE_VS_B1_BCELL_UP	0.00414938	0.025207	0.395551	1.80487	0	135
GO_GUANYL_NUCLEOTIDE_EXCHANGE_FACTOR_ACTIVITY	0.00456621	0.025207	0.382917	1.80403	0	161
GSE18281_PERIMEDULLARY_CORTICAL_REGION_VS_WHOLE_CORTEX_THYMUS_UP	0.00392157	0.025207	0.396885	1.80358	0	130
GSE18791_CTRL_VS_NEWCASTLE_VIRUS_DC_1H_DN	0.00334448	0.025207	0.419413	1.80326	0	90
GO_DOUBLE_STRAND_BREAK_REPAIR	0.00421941	0.025207	0.392375	1.80302	0	144
GSE22886_DAY0_VS_DAY7_MONOCYTE_IN_CULTURE_UP	0.00452489	0.025207	0.38398	1.80295	0	155
MORF_FANCG	0.00389105	0.025207	0.398587	1.80294	0	128
GSE36392_EOSINOPHIL_VS_NEUTROPHIL_IL25_TREATED_LUNG_UP	0.00393701	0.025207	0.40211	1.80287	0	126
GO_I_KAPPAB_KINASE_NF_KAPPAB_SIGNALING	0.00310559	0.025207	0.449736	1.80285	0	59
ACAACCT,MIR-453	0.01	0.0405351	0.535911	1.80261	3	28
WANG_RESPONSE_TO_GSK3_INHIBITOR_SB216763_DN	0.00552486	0.0272301	0.355823	1.80258	0	304
HALLMARK_G2M_CHECKPOINT	0.00473934	0.025207	0.375551	1.80218	0	190
GSE14308_TH17_VS_NAIVE_CD4_TCELL_DN	0.00421941	0.025207	0.398739	1.80204	0	133
V$NFKB_C	0.00444444	0.025207	0.390288	1.80111	0	149
PUJANA_BREAST_CANCER_LIT_INT_NETWORK	0.00344828	0.025207	0.412126	1.80013	0	96
GO_RESPONSE_TO_RADIATION	0.00531915	0.0264608	0.360998	1.79961	0	265
GENTILE_UV_LOW_DOSE_DN	0.00283286	0.025207	0.482885	1.79948	0	42
YU_BAP1_TARGETS	0.00763359	0.0343357	0.547209	1.79907	2	27
GSE14308_TH1_VS_NATURAL_TREG_DN	0.00444444	0.025207	0.389773	1.79873	0	149
REACTOME_CD28_DEPENDENT_PI3K_AKT_SIGNALING	0.0117096	0.0456469	0.610257	1.79864	4	17
ODONNELL_METASTASIS_UP	0.00530504	0.0264608	0.506749	1.79835	1	34
GO_INTRINSIC_APOPTOTIC_SIGNALING_PATHWAY	0.00389105	0.025207	0.402698	1.79811	0	122
GSE24634_TREG_VS_TCONV_POST_DAY10_IL4_CONVERSION_UP	0.00471698	0.025207	0.379514	1.79752	0	172
GSE20500_CTRL_VS_RARA_ANTAGONIST_TREATED_CD4_TCELL_UP	0.00406504	0.025207	0.391715	1.79722	0	136
GSE22886_NAIVE_CD8_TCELL_VS_NKCELL_DN	0.004329	0.025207	0.388759	1.79716	0	147
GO_CENTRIOLE	0.00320513	0.025207	0.424828	1.797	0	81
GESERICK_TERT_TARGETS_DN	0.0115473	0.0452792	0.628839	1.79642	4	15
GNF2_CDC2	0.00307692	0.025207	0.44307	1.79571	0	61
GSE18893_TCONV_VS_TREG_24H_CULTURE_DN	0.0042735	0.025207	0.390296	1.79551	0	146
MORF_FDXR	0.0045045	0.025207	0.388012	1.79491	0	150
GO_HEAT_SHOCK_PROTEIN_BINDING	0.00314465	0.025207	0.440721	1.79466	0	68
MORF_PSMF1	0.00377358	0.025207	0.403809	1.79452	0	116
AGCACTT,MIR-93,MIR-302A,MIR-302B,MIR-302C,MIR-302D,MIR-372,MIR-373,MIR-520E,MIR-520A,MIR-526B,MIR-520B,MIR-520C,MIR-520D	0.00478469	0.025207	0.364164	1.79416	0	234
GSE41867_DAY8_VS_DAY15_LCMV_ARMSTRONG_EFFECTOR_CD8_TCELL_DN	0.00297619	0.025207	0.464465	1.79391	0	49
GSE29164_CD8_TCELL_VS_CD8_TCELL_AND_IL12_TREATED_MELANOMA_DAY7_UP	0.00452489	0.025207	0.377359	1.79323	0	167
GO_MEIOTIC_CELL_CYCLE	0.00377358	0.025207	0.402679	1.79295	0	113
DURCHDEWALD_SKIN_CARCINOGENESIS_DN	0.00444444	0.025207	0.37216	1.79289	0	182
PID_ATF2_PATHWAY	0.00269542	0.025207	0.484129	1.79283	0	39
V$SOX5_01	0.00458716	0.025207	0.379358	1.79275	0	160
GO_REGULATION_OF_DNA_METABOLIC_PROCESS	0.00505051	0.0257292	0.362353	1.79219	0	246
GO_HISTONE_METHYLATION	0.00308642	0.025207	0.443551	1.79206	0	60
ROSTY_CERVICAL_CANCER_PROLIFERATION_CLUSTER	0.00421941	0.025207	0.396492	1.79189	0	133
GSE2405_0H_VS_24H_A_PHAGOCYTOPHILUM_STIM_NEUTROPHIL_DN	0.003663	0.025207	0.402175	1.79102	0	110
GO_REGULATION_OF_EPITHELIAL_CELL_DIFFERENTIATION	0.00297619	0.025207	0.463657	1.79079	0	49
BURTON_ADIPOGENESIS_11	0.00280112	0.025207	0.473187	1.79024	0	43
REACTOME_HOMOLOGOUS_RECOMBINATION_REPAIR_OF_REPLICATION_INDEPENDENT_DOUBLE_STRAND_BREAKS	0.0117096	0.0456469	0.616527	1.79018	4	16
V$CEBPB_01	0.00421941	0.025207	0.389491	1.78977	0	144
MONNIER_POSTRADIATION_TUMOR_ESCAPE_UP	0.00588235	0.0285592	0.352475	1.78974	0	315
GCM_NUMA1	0.00284091	0.025207	0.463096	1.78936	0	48
GCM_PTPRD	0.00280899	0.025207	0.469352	1.78905	0	45
TAGCTTT,MIR-9	0.00456621	0.025207	0.379737	1.78905	0	161
V$FOXD3_01	0.00352113	0.025207	0.409646	1.78831	0	97
GO_REGULATION_OF_MICROTUBULE_BASED_PROCESS	0.0047619	0.025207	0.373017	1.78828	0	194
TERAMOTO_OPN_TARGETS_CLUSTER_7	0.0117096	0.0456469	0.615861	1.78825	4	16
SANSOM_APC_TARGETS	0.00389105	0.025207	0.395321	1.78817	0	128
GO_CELLULAR_RESPONSE_TO_LIGHT_STIMULUS	0.00321543	0.025207	0.443891	1.78803	0	64
GSE27859_MACROPHAGE_VS_DC_UP	0.00403226	0.025207	0.40513	1.78803	0	119
YEGNASUBRAMANIAN_PROSTATE_CANCER	0.00307692	0.025207	0.441084	1.78766	0	61
GNF2_DDX5	0.00310559	0.025207	0.44589	1.78743	0	59
DARWICHE_PAPILLOMA_PROGRESSION_RISK	0.00530504	0.0264608	0.495234	1.78725	1	36
BROWNE_HCMV_INFECTION_8HR_UP	0.00321543	0.025207	0.43492	1.78705	0	71
MODULE_133	0.0115473	0.0452792	0.625505	1.7869	4	15
GERY_CEBP_TARGETS	0.00309598	0.025207	0.430117	1.7863	0	74
GO_P53_BINDING	0.00304878	0.025207	0.453479	1.78625	0	53
GCM_GSPT1	0.00436681	0.025207	0.382924	1.78621	0	152
GSE14415_INDUCED_VS_NATURAL_TREG_UP	0.00380228	0.025207	0.402399	1.78601	0	114
BURTON_ADIPOGENESIS_PEAK_AT_2HR	0.00779221	0.0346401	0.524397	1.78566	2	30
GSE40274_FOXP3_VS_FOXP3_AND_GATA1_TRANSDUCED_ACTIVATED_CD4_TCELL_DN	0.00421941	0.025207	0.395109	1.78564	0	133
TSAI_RESPONSE_TO_IONIZING_RADIATION	0.00362319	0.025207	0.401954	1.78538	0	109
GO_POSITIVE_REGULATION_OF_NEURON_DIFFERENTIATION	0.00452489	0.025207	0.375681	1.78526	0	167
GSE13547_2H_VS_12_H_ANTI_IGM_STIM_ZFX_KO_BCELL_UP	0.00389105	0.025207	0.404575	1.78514	0	115
GO_CENTRIOLAR_SATELLITE	0.00943396	0.0386401	0.590843	1.78476	3	19
V$FREAC2_01	0.00420168	0.025207	0.390339	1.78438	0	140
GO_SOMATIC_DIVERSIFICATION_OF_IMMUNE_RECEPTORS	0.00530504	0.0264608	0.494397	1.78423	1	36
GO_NEGATIVE_REGULATION_OF_HISTONE_MODIFICATION	0.00779221	0.0346401	0.523832	1.78374	2	30
V$AR_03	0.00518135	0.0260769	0.506175	1.7835	1	33
MODULE_1	0.00446429	0.025207	0.370121	1.783	0	186
GSE25088_WT_VS_STAT6_KO_MACROPHAGE_IL4_STIM_UP	0.00440529	0.025207	0.381341	1.78223	0	153
KEGG_SMALL_CELL_LUNG_CANCER	0.00308642	0.025207	0.440976	1.78166	0	60
V$E2F1_Q4	0.00446429	0.025207	0.369753	1.78123	0	186
GSE46606_IRF4_KO_VS_WT_UNSTIM_BCELL_DN	0.00362319	0.025207	0.403559	1.78118	0	103
GTATGAT,MIR-154,MIR-487	0.00301205	0.025207	0.44852	1.78081	0	54
GARGALOVIC_RESPONSE_TO_OXIDIZED_PHOSPHOLIPIDS_BLACK_UP	0.0125	0.0479568	0.529079	1.77963	4	28
GSE46606_IRF4MID_VS_WT_CD40L_IL2_IL5_DAY3_STIMULATED_BCELL_UP	0.00420168	0.025207	0.389261	1.77945	0	140
FURUKAWA_DUSP6_TARGETS_PCI35_DN	0.00301205	0.025207	0.447945	1.77853	0	54
GSE21063_WT_VS_NFATC1_KO_8H_ANTI_IGM_STIM_BCELL_UP	0.00465116	0.025207	0.374916	1.77845	0	177
GO_NEURAL_TUBE_DEVELOPMENT	0.00350877	0.025207	0.40446	1.77757	0	99
GCNP_SHH_UP_LATE.V1_UP	0.00403226	0.025207	0.38709	1.77737	0	138
GSE9988_ANTI_TREM1_VS_CTRL_TREATED_MONOCYTES_DN	0.00458716	0.025207	0.37411	1.77726	0	169
GO_REGULATION_OF_EPIDERMAL_CELL_DIFFERENTIATION	0.00956938	0.0390987	0.581402	1.77586	3	20
GSE12963_ENV_NEF_VS_ENV_NEF_AND_VPR_DEFICIENT_HIV1_INF_CD4_TCELL_UP	0.00334448	0.025207	0.412937	1.77542	0	90
GSE43863_TFH_VS_LY6C_INT_CXCR5POS_MEMORY_CD4_TCELL_UP	0.00393701	0.025207	0.395845	1.77479	0	126
GO_NEURAL_PRECURSOR_CELL_PROLIFERATION	0.00549451	0.0271608	0.47547	1.77445	1	41
GSE21678_WT_VS_FOXO1_FOXO3_KO_TREG_UP	0.00406504	0.025207	0.38652	1.77394	0	137
GO_ACTIN_FILAMENT	0.00277008	0.025207	0.467507	1.77345	0	44
KMCATNNWGGA_UNKNOWN	0.00321543	0.025207	0.440194	1.77314	0	64
GSE39820_TGFBETA1_IL6_VS_TGFBETA1_IL6_IL23A_TREATED_CD4_TCELL_UP	0.00456621	0.025207	0.376282	1.77277	0	161
GO_TRANSCRIPTIONAL_ACTIVATOR_ACTIVITY_RNA_POLYMERASE_II_DISTAL_ENHANCER_SEQUENCE_SPECIFIC_BINDING	0.0117096	0.0456469	0.610213	1.77185	4	16
CCCAGAG,MIR-326	0.00340136	0.025207	0.411254	1.77181	0	93
GSE39916_B_CELL_SPLEEN_VS_PLASMA_CELL_BONE_MARROW_UP	0.00420168	0.025207	0.392907	1.77161	0	132
ZWANG_CLASS_1_TRANSIENTLY_INDUCED_BY_EGF	0.00588235	0.0285592	0.348521	1.77098	0	311
GO_G2_DNA_DAMAGE_CHECKPOINT	0.0128535	0.0488769	0.524532	1.76998	4	29
GTGCAAT,MIR-25,MIR-32,MIR-92,MIR-363,MIR-367	0.00485437	0.025207	0.365516	1.76994	0	217
GO_CYTOSOLIC_CALCIUM_ION_TRANSPORT	0.0075	0.0338376	0.539674	1.76935	2	25
GSE34179_THPOK_KO_VS_WT_VA14I_NKTCELL_DN	0.00362319	0.025207	0.398306	1.76917	0	109
GO_NEGATIVE_REGULATION_OF_HISTONE_METHYLATION	0.0117096	0.0456469	0.608853	1.7679	4	16
GSE18791_CTRL_VS_NEWCASTLE_VIRUS_DC_10H_DN	0.00414938	0.025207	0.387353	1.76746	0	135
GO_DNA_RECOMBINATION	0.0047619	0.025207	0.373194	1.767	0	173
chr16q12	0.0128535	0.0488769	0.523493	1.76647	4	29
SABATES_COLORECTAL_ADENOMA_UP	0.00795756	0.0349905	0.497649	1.76606	2	34
V$HMX1_01	0.00746269	0.0337149	0.555628	1.76543	2	23
GO_ESTABLISHMENT_OF_ENDOTHELIAL_BARRIER	0.00982801	0.0399594	0.560644	1.76493	3	22
GSE22886_CD8_VS_CD4_NAIVE_TCELL_DN	0.00364964	0.025207	0.39846	1.76487	0	106
AATGGAG,MIR-136	0.00297619	0.025207	0.449612	1.7645	0	52
GO_HETEROCHROMATIN	0.00306748	0.025207	0.441612	1.76448	0	57
LI_WILMS_TUMOR_VS_FETAL_KIDNEY_1_DN	0.00420168	0.025207	0.385959	1.76435	0	140
GSE21670_TGFB_VS_IL6_TREATED_CD4_TCELL_UP	0.00323625	0.025207	0.437913	1.76421	0	67
GSE21774_CD62L_POS_CD56_BRIGHT_VS_CD62L_NEG_CD56_DIM_NK_CELL_DN	0.003861	0.025207	0.388143	1.76407	0	129
GSE15767_MED_VS_SCS_MAC_LN_DN	0.0042735	0.025207	0.383254	1.76312	0	146
GSE40274_FOXP3_VS_FOXP3_AND_PBX1_TRANSDUCED_ACTIVATED_CD4_TCELL_DN	0.00414938	0.025207	0.38628	1.76256	0	135
GSE39820_CTRL_VS_TGFBETA3_IL6_IL23A_CD4_TCELL_UP	0.0047619	0.025207	0.372106	1.76185	0	173
REACTOME_PI3K_EVENTS_IN_ERBB2_SIGNALING	0.00795756	0.0349905	0.496451	1.76181	2	34
SHAFFER_IRF4_TARGETS_IN_PLASMA_CELL_VS_MATURE_B_LYMPHOCYTE	0.00310559	0.025207	0.439465	1.76168	0	59
GSE17721_0.5H_VS_4H_GARDIQUIMOD_BMDC_DN	0.0042735	0.025207	0.382871	1.76135	0	146
KEGG_ACUTE_MYELOID_LEUKEMIA	0.00297619	0.025207	0.456031	1.76134	0	49
GO_REGULATION_OF_DNA_RECOMBINATION	0.00539084	0.0267874	0.472423	1.76084	1	40
MODULE_261	0.00320513	0.025207	0.414084	1.76044	0	82
GSE9037_CTRL_VS_LPS_1H_STIM_BMDM_DN	0.00389105	0.025207	0.39402	1.75936	0	122
GO_POSITIVE_REGULATION_OF_JUN_KINASE_ACTIVITY	0.00283286	0.025207	0.471939	1.75869	0	42
GO_CELLULAR_RESPONSE_TO_BIOTIC_STIMULUS	0.00357143	0.025207	0.400757	1.75831	0	100
GSE6674_ANTI_IGM_VS_PL2_3_STIM_BCELL_DN	0.00460829	0.025207	0.370637	1.75778	0	175
DE_YY1_TARGETS_DN	0.00321543	0.025207	0.427788	1.75774	0	71
GSE25088_WT_VS_STAT6_KO_MACROPHAGE_DN	0.00421941	0.025207	0.383277	1.75718	0	142
GO_AXIS_SPECIFICATION	0.00561798	0.0275364	0.460928	1.75694	1	45
HALLMARK_UV_RESPONSE_DN	0.00331126	0.025207	0.406643	1.75619	0	91
GSE42724_MEMORY_BCELL_VS_PLASMABLAST_UP	0.00452489	0.025207	0.371488	1.75541	0	159
GO_PEPTIDYL_LYSINE_MODIFICATION	0.00520833	0.0261732	0.351504	1.75531	0	264
GSE46606_UNSTIM_VS_CD40L_IL2_IL5_1DAY_STIMULATED_IRF4HIGH_SORTED_BCELL_DN	0.00409836	0.025207	0.383535	1.75523	0	139
KANG_DOXORUBICIN_RESISTANCE_UP	0.00297619	0.025207	0.447187	1.75498	0	52
DOANE_RESPONSE_TO_ANDROGEN_DN	0.00454545	0.025207	0.369147	1.75492	0	166
GSE20754_WT_VS_TCF1_KO_MEMORY_CD8_TCELL_UP	0.00452489	0.025207	0.373655	1.75447	0	155
GSE11924_TFH_VS_TH1_CD4_TCELL_UP	0.00465116	0.025207	0.370031	1.75374	0	168
RASHI_RESPONSE_TO_IONIZING_RADIATION_3	0.00810811	0.0354301	0.493439	1.75365	2	35
GSE18791_CTRL_VS_NEWCASTLE_VIRUS_DC_4H_DN	0.00393701	0.025207	0.393533	1.7529	0	123
ONDER_CDH1_SIGNALING_VIA_CTNNB1	0.00795756	0.0349905	0.49367	1.75194	2	34
GO_REGULATION_OF_GTPASE_ACTIVITY	0.00671141	0.0311439	0.336385	1.75079	0	390
GO_SUPRAMOLECULAR_FIBER	0.00609756	0.0294219	0.33793	1.7502	0	354
CRX_DN.V1_DN	0.00310559	0.025207	0.436335	1.74913	0	59
REACTOME_PI3K_EVENTS_IN_ERBB4_SIGNALING	0.00508906	0.025824	0.505455	1.74907	1	31
MODULE_229	0.0127226	0.0485317	0.531974	1.74899	4	27
VARELA_ZMPSTE24_TARGETS_UP	0.00506329	0.0257845	0.500146	1.74893	1	32
GO_LIMB_DEVELOPMENT	0.00310559	0.025207	0.416121	1.7484	0	77
GO_APPENDAGE_DEVELOPMENT	0.00310559	0.025207	0.416121	1.7484	0	77
GO_CELLULAR_RESPONSE_TO_ABIOTIC_STIMULUS	0.00456621	0.025207	0.3711	1.74836	0	161
ATTCTTT,MIR-186	0.00438596	0.025207	0.362239	1.74825	0	183
GSE18791_CTRL_VS_NEWCASTLE_VIRUS_DC_16H_DN	0.00408163	0.025207	0.395668	1.74805	0	120
MORF_MT4	0.0044843	0.025207	0.372626	1.74748	0	154
CAGCAGG,MIR-370	0.00362319	0.025207	0.395898	1.74737	0	103
GSE42021_TCONV_PLN_VS_TREG_PRECURSORS_THYMUS_DN	0.00444444	0.025207	0.378541	1.7469	0	149
GSE17721_LPS_VS_CPG_1H_BMDC_DN	0.00421941	0.025207	0.380135	1.74678	0	144
GRAHAM_NORMAL_QUIESCENT_VS_NORMAL_DIVIDING_DN	0.00320513	0.025207	0.416889	1.74657	0	79
GUO_HEX_TARGETS_UP	0.00310559	0.025207	0.435693	1.74655	0	59
OXFORD_RALA_OR_RALB_TARGETS_UP	0.00561798	0.0275364	0.458197	1.74653	1	45
GSE11386_NAIVE_VS_MEMORY_BCELL_DN	0.00401606	0.025207	0.389745	1.74643	0	127
V$GR_01	0.00371747	0.025207	0.391775	1.74604	0	112
BILD_HRAS_ONCOGENIC_SIGNATURE	0.00444444	0.025207	0.378308	1.74583	0	149
GNF2_FEN1	0.00303951	0.025207	0.438289	1.74513	0	56
GAZDA_DIAMOND_BLACKFAN_ANEMIA_MYELOID_UP	0.0123457	0.0475564	0.538571	1.7433	4	24
GCM_RAN	0.00465116	0.025207	0.366245	1.74286	0	178
REACTOME_IL_3_5_AND_GM_CSF_SIGNALING	0.00795756	0.0349905	0.491056	1.74266	2	34
YAO_TEMPORAL_RESPONSE_TO_PROGESTERONE_CLUSTER_1	0.00539084	0.0267874	0.467383	1.74205	1	40
PID_AR_TF_PATHWAY	0.00271003	0.025207	0.473661	1.74164	0	38
GSE41087_WT_VS_FOXP3_MUT_ANTI_CD3_CD28_STIM_CD4_TCELL_UP	0.00420168	0.025207	0.386196	1.74135	0	132
ACTTTAT,MIR-142-5P	0.00478469	0.025207	0.360883	1.74135	0	197
GO_TUMOR_NECROSIS_FACTOR_RECEPTOR_BINDING	0.0117925	0.0459162	0.583459	1.74093	4	18
GO_MICROTUBULE_ORGANIZING_CENTER_PART	0.00389105	0.025207	0.39397	1.74073	0	117
GSE21033_3H_VS_12H_POLYIC_STIM_DC_UP	0.00398406	0.025207	0.39447	1.73968	0	118
GO_EMBRYO_DEVELOPMENT	0.00833333	0.0361183	0.33015	1.73964	0	469
MORF_NF1	0.00320513	0.025207	0.409075	1.73915	0	82
MODULE_500	0.0117925	0.0459162	0.582578	1.7383	4	18
GO_HEART_DEVELOPMENT	0.00512821	0.0259072	0.350308	1.73817	0	249
REACTOME_NEPHRIN_INTERACTIONS	0.0138568	0.0517621	0.608385	1.73799	5	15
GSE7768_OVA_ALONE_VS_OVA_WITH_MPL_IMMUNIZED_MOUSE_WHOLE_SPLEEN_6H_UP	0.00436681	0.025207	0.372468	1.73743	0	152
GSE13493_DP_VS_CD4INTCD8POS_THYMOCYTE_UP	0.0045045	0.025207	0.375517	1.73711	0	150
GO_CYTOKINE_RECEPTOR_BINDING	0.00357143	0.025207	0.395902	1.737	0	100
GSE41867_NAIVE_VS_DAY6_LCMV_EFFECTOR_CD8_TCELL_DN	0.00452489	0.025207	0.365414	1.73647	0	167
BROWNE_HCMV_INFECTION_16HR_UP	0.00465116	0.025207	0.365768	1.73506	0	177
AMIT_EGF_RESPONSE_240_HELA	0.00280112	0.025207	0.458591	1.73502	0	43
FALVELLA_SMOKERS_WITH_LUNG_CANCER	0.00302115	0.025207	0.447082	1.73479	0	50
GO_TRANSCRIPTION_FACTOR_ACTIVITY_RNA_POLYMERASE_II_TRANSCRIPTION_FACTOR_BINDING	0.00334448	0.025207	0.403378	1.73432	0	90
GO_POSITIVE_REGULATION_OF_AXONOGENESIS	0.00549451	0.0271608	0.464661	1.73411	1	41
GCM_MAX	0.0154242	0.0559703	0.513858	1.73396	5	29
RIZ_ERYTHROID_DIFFERENTIATION_HBZ	0.00956938	0.0390987	0.567666	1.73391	3	20
GSE2706_UNSTIM_VS_2H_LPS_AND_R848_DC_UP	0.00469484	0.025207	0.370632	1.73284	0	156
ST_FAS_SIGNALING_PATHWAY	0.00308642	0.025207	0.446383	1.73204	0	51
V$PR_01	0.00309598	0.025207	0.417025	1.73193	0	74
MORF_IL13	0.00392157	0.025207	0.389683	1.73162	0	121
AATGTGA,MIR-23A,MIR-23B	0.00531915	0.0264608	0.346763	1.73153	0	268
TGCCTTA,MIR-124A	0.00657895	0.030711	0.331943	1.73132	0	391
GO_MICROTUBULE_ORGANIZING_CENTER	0.00900901	0.0381206	0.32708	1.73127	0	498
IVANOVA_HEMATOPOIESIS_STEM_CELL_SHORT_TERM	0.00956938	0.0390987	0.56669	1.73093	3	20
AMIT_SERUM_RESPONSE_120_MCF10A	0.00554017	0.0272955	0.456075	1.73009	1	44
BLUM_RESPONSE_TO_SALIRASIB_UP	0.00483092	0.025207	0.356515	1.73003	0	215
GO_KINESIN_BINDING	0.00943396	0.0386401	0.572546	1.7295	3	19
GO_REPLICATION_FORK	0.00308642	0.025207	0.428048	1.72943	0	60
MORF_RBM8A	0.00308642	0.025207	0.445625	1.7291	0	51
GSE15750_DAY6_VS_DAY10_TRAF6KO_EFF_CD8_TCELL_DN	0.00421941	0.025207	0.377046	1.72861	0	142
GAUSSMANN_MLL_AF4_FUSION_TARGETS_A_UP	0.00408163	0.025207	0.391223	1.72842	0	120
GSE22886_NAIVE_VS_MEMORY_TCELL_UP	0.00392157	0.025207	0.380256	1.72801	0	130
PID_IL12_2PATHWAY	0.00271003	0.025207	0.469816	1.72751	0	38
MITSIADES_RESPONSE_TO_APLIDIN_UP	0.00628931	0.0298714	0.336774	1.72688	0	341
GSE19941_IL10_KO_VS_IL10_KO_AND_NFKBP50_KO_LPS_AND_IL10_STIM_MACROPHAGE_DN	0.00414938	0.025207	0.378447	1.72682	0	135
GENTILE_UV_RESPONSE_CLUSTER_D2	0.00795756	0.0349905	0.486511	1.72653	2	34
MODULE_35	0.0140515	0.0521534	0.594446	1.72607	5	16
V$TGIF_01	0.00414938	0.025207	0.378271	1.72602	0	135
SA_CASPASE_CASCADE	0.0140515	0.0521534	0.594429	1.72602	5	16
GO_CAMERA_TYPE_EYE_MORPHOGENESIS	0.00542005	0.0269125	0.469399	1.72598	1	38
V$PAX4_01	0.00465116	0.025207	0.364644	1.72579	0	171
GO_MICROTUBULE_BINDING	0.00420168	0.025207	0.376472	1.72562	0	143
GO_NEGATIVE_REGULATION_OF_DNA_METABOLIC_PROCESS	0.00330033	0.025207	0.406318	1.72524	0	83
V$IK3_01	0.00362319	0.025207	0.389817	1.7251	0	107
GO_NEGATIVE_REGULATION_OF_CYTOSKELETON_ORGANIZATION	0.00465116	0.025207	0.364342	1.72436	0	171
GSE21546_WT_VS_SAP1A_KO_ANTI_CD3_STIM_DP_THYMOCYTES_DN	0.00456621	0.025207	0.363659	1.72354	0	165
GO_HEART_MORPHOGENESIS	0.00352113	0.025207	0.394766	1.72335	0	97
AAGCACT,MIR-520F	0.00460829	0.025207	0.366121	1.72295	0	162
GO_RETROGRADE_TRANSPORT_VESICLE_RECYCLING_WITHIN_GOLGI	0.0124378	0.047856	0.54217	1.72267	4	23
GO_SPINDLE_POLE	0.00364964	0.025207	0.389309	1.7225	0	105
GCNP_SHH_UP_EARLY.V1_UP	0.00389105	0.025207	0.380782	1.72241	0	128
HOFMANN_MYELODYSPLASTIC_SYNDROM_LOW_RISK_UP	0.0138568	0.0517621	0.60289	1.72229	5	15
MODULE_318	0.0127226	0.0485317	0.523783	1.72206	4	27
SAGIV_CD24_TARGETS_UP	0.0165094	0.0589774	0.577094	1.72194	6	18
GNF2_CCNA2	0.00323625	0.025207	0.427279	1.72137	0	67
SCHAEFFER_PROSTATE_DEVELOPMENT_48HR_DN	0.00478469	0.025207	0.356647	1.7209	0	197
PID_IL4_2PATHWAY	0.00542005	0.0269125	0.468017	1.72089	1	38
GSE17301_CTRL_VS_48H_ACD3_ACD28_IFNA5_STIM_CD8_TCELL_DN	0.00465116	0.025207	0.362829	1.7196	0	168
GSE6269_FLU_VS_E_COLI_INF_PBMC_UP	0.00416667	0.025207	0.378134	1.71941	0	134
GSE18791_CTRL_VS_NEWCASTLE_VIRUS_DC_6H_DN	0.004329	0.025207	0.371843	1.71896	0	147
GENTILE_UV_HIGH_DOSE_DN	0.00507614	0.025824	0.34586	1.7186	0	255
GO_RNA_POLYMERASE_II_TRANSCRIPTION_COFACTOR_ACTIVITY	0.00323625	0.025207	0.426534	1.71837	0	67
GSE13762_CTRL_VS_125_VITAMIND_DAY12_DC_DN	0.0031746	0.025207	0.424835	1.71776	0	66
GSE6269_HEALTHY_VS_STAPH_AUREUS_INF_PBMC_UP	0.00421941	0.025207	0.375479	1.71713	0	141
GO_REGULATION_OF_VASOCONSTRICTION	0.0210773	0.0706521	0.582428	1.71662	8	17
GO_NEGATIVE_REGULATION_OF_DNA_REPLICATION	0.00560224	0.0274895	0.45372	1.71659	1	43
BROWNE_HCMV_INFECTION_4HR_UP	0.0125	0.0479568	0.510199	1.71612	4	28
GO_REGULATION_OF_TELOMERE_CAPPING	0.0165094	0.0589774	0.574893	1.71537	6	18
PID_ERBB4_PATHWAY	0.0125	0.0479568	0.50993	1.71522	4	28
GSE42021_TREG_PLN_VS_CD24HI_TREG_THYMUS_UP	0.00409836	0.025207	0.374724	1.71491	0	139
GSE5589_IL6_KO_VS_IL10_KO_LPS_AND_IL6_STIM_MACROPHAGE_45MIN_UP	0.00469484	0.025207	0.366708	1.71449	0	156
TACTTGA,MIR-26A,MIR-26B	0.00492611	0.0253571	0.354173	1.71396	0	216
GO_PEPTIDYL_THREONINE_MODIFICATION	0.00808625	0.0354042	0.462829	1.71395	2	39
LEE_EARLY_T_LYMPHOCYTE_UP	0.00344828	0.025207	0.397545	1.71393	0	94
KEGG_APOPTOSIS	0.00318471	0.025207	0.418949	1.71385	0	69
GO_REGULATION_OF_PROTEIN_IMPORT_INTO_NUCLEUS_TRANSLOCATION	0.0184758	0.0640454	0.599727	1.71326	7	15
EBAUER_TARGETS_OF_PAX3_FOXO1_FUSION_DN	0.0148148	0.0544108	0.52911	1.71267	5	24
GSE40666_UNTREATED_VS_IFNA_STIM_STAT4_KO_EFFECTOR_CD8_TCELL_90MIN_DN	0.00444444	0.025207	0.36809	1.71266	0	151
TGGTGCT,MIR-29A,MIR-29B,MIR-29C	0.00621118	0.0296907	0.335699	1.71258	0	330
GCM_CALM1	0.00340136	0.025207	0.397233	1.7114	0	93
GSE20727_CTRL_VS_H2O2_TREATED_DC_UP	0.00458716	0.025207	0.364035	1.71125	0	157
PID_REG_GR_PATHWAY	0.00297619	0.025207	0.43594	1.71084	0	52
SAGIV_CD24_TARGETS_DN	0.0103896	0.0416209	0.502327	1.71051	3	30
chr15q13	0.0121065	0.0468654	0.551602	1.70996	4	21
KIM_GERMINAL_CENTER_T_HELPER_DN	0.0140515	0.0521534	0.588755	1.70954	5	16
KAUFFMANN_DNA_REPAIR_GENES	0.00485437	0.025207	0.353041	1.70954	0	217
GO_HISTONE_UBIQUITINATION	0.0103627	0.0416099	0.485167	1.70948	3	33
GSE17721_CTRL_VS_POLYIC_2H_BMDC_DN	0.00367647	0.025207	0.383948	1.70903	0	111
GSE45365_NK_CELL_VS_CD11B_DC_DN	0.00389105	0.025207	0.382718	1.7089	0	122
GO_CELLULAR_RESPONSE_TO_RADIATION	0.00357143	0.025207	0.388124	1.70881	0	101
GO_POSITIVE_REGULATION_OF_NERVOUS_SYSTEM_DEVELOPMENT	0.00492611	0.0253571	0.356259	1.70872	0	211
GO_POSITIVE_REGULATION_OF_NEURON_DEATH	0.00277778	0.025207	0.44175	1.70816	0	47
GTATTAT,MIR-369-3P	0.00421941	0.025207	0.37255	1.708	0	142
PID_WNT_CANONICAL_PATHWAY	0.0165094	0.0589774	0.572244	1.70747	6	18
PID_FRA_PATHWAY	0.0165094	0.0589774	0.572028	1.70682	6	18
V$MAZR_01	0.00406504	0.025207	0.371959	1.70657	0	136
BROWNE_HCMV_INFECTION_18HR_UP	0.00406504	0.025207	0.37548	1.70605	0	131
V$SP1_Q2_01	0.00458716	0.025207	0.362919	1.706	0	157
GSE2585_CD80_HIGH_VS_LOW_AIRE_KO_MTEC_DN	0.00321543	0.025207	0.405279	1.70587	0	80
GO_ENHANCER_BINDING	0.00310559	0.025207	0.423784	1.70566	0	62
CAGCCTC,MIR-485-5P	0.00344828	0.025207	0.399128	1.70549	0	89
GSE14386_UNTREATED_VS_IFNA_TREATED_ACT_PBMC_MS_PATIENT_DN	0.00362319	0.025207	0.383957	1.70544	0	109
GO_LYSINE_N_METHYLTRANSFERASE_ACTIVITY	0.00810811	0.0354301	0.479768	1.70507	2	35
GSE32986_UNSTIM_VS_CURDLAN_HIGHDOSE_STIM_DC_UP	0.00454545	0.025207	0.358566	1.70462	0	166
GO_REGULATION_OF_HISTONE_H3_K9_METHYLATION	0.0184758	0.0640454	0.596616	1.70437	7	15
GSE20500_RETINOIC_ACID_VS_RARA_ANTAGONIST_TREATED_CD4_TCELL_DN	0.00421941	0.025207	0.377122	1.70435	0	133
DEBIASI_APOPTOSIS_BY_REOVIRUS_INFECTION_DN	0.00483092	0.025207	0.348018	1.70325	0	225
LEIN_CEREBELLUM_MARKERS	0.00797872	0.0350255	0.466942	1.70174	2	37
GO_NEGATIVE_REGULATION_OF_GENE_SILENCING	0.0184758	0.0640454	0.595679	1.70169	7	15
ZHENG_FOXP3_TARGETS_IN_T_LYMPHOCYTE_DN	0.0127226	0.0485317	0.517578	1.70165	4	27
GO_PORE_COMPLEX_ASSEMBLY	0.0184758	0.0640454	0.595638	1.70158	7	15
GO_TUBULIN_BINDING	0.0047619	0.025207	0.354898	1.70142	0	194
GCM_CSNK1A1	0.00810811	0.0354301	0.478706	1.70129	2	35
GSE31082_DN_VS_DP_THYMOCYTE_DN	0.00465116	0.025207	0.357509	1.70129	0	178
TCTGATC,MIR-383	0.0101266	0.0409486	0.486457	1.70106	3	32
REACTOME_GENERIC_TRANSCRIPTION_PATHWAY	0.00564972	0.0276614	0.337997	1.70087	0	279
GSE23502_BM_VS_COLON_TUMOR_MYELOID_DERIVED_SUPPRESSOR_CELL_DN	0.00458716	0.025207	0.3618	1.70074	0	157
GO_HEMATOPOIETIC_PROGENITOR_CELL_DIFFERENTIATION	0.00613497	0.0295169	0.425628	1.70062	1	57
BILBAN_B_CLL_LPL_DN	0.0101781	0.0410947	0.491449	1.70061	3	31
GO_CALCIUM_ION_IMPORT_INTO_CYTOSOL	0.017199	0.0609185	0.540157	1.70044	6	22
GO_CALCIUM_ION_TRANSMEMBRANE_IMPORT_INTO_CYTOSOL	0.017199	0.0609185	0.540157	1.70044	6	22
GSE41867_DAY6_EFFECTOR_VS_DAY30_MEMORY_CD8_TCELL_LCMV_ARMSTRONG_DN	0.00454545	0.025207	0.357652	1.70028	0	166
GO_INTRINSIC_APOPTOTIC_SIGNALING_PATHWAY_BY_P53_CLASS_MEDIATOR	0.00560224	0.0274895	0.449361	1.7001	1	43
GSE40225_WT_VS_RIP_B7X_DIABETIC_MOUSE_PANCREATIC_CD8_TCELL_UP	0.00460829	0.025207	0.360905	1.69937	0	158
TURASHVILI_BREAST_DUCTAL_CARCINOMA_VS_DUCTAL_NORMAL_DN	0.00615385	0.0295757	0.419122	1.69865	1	61
GO_ER_NUCLEUS_SIGNALING_PATHWAY	0.012987	0.0492863	0.498738	1.69829	4	30
GO_DNA_DIRECTED_DNA_POLYMERASE_ACTIVITY	0.0125	0.0479568	0.517801	1.69764	4	25
PID_ATM_PATHWAY	0.0106101	0.0422376	0.47836	1.69761	3	34
PID_HIV_NEF_PATHWAY	0.0101266	0.0409486	0.48545	1.69754	3	32
STAMBOLSKY_TARGETS_OF_MUTATED_TP53_UP	0.0103627	0.0416099	0.481758	1.69747	3	33
GO_CIRCULATORY_SYSTEM_DEVELOPMENT	0.00662252	0.030828	0.325046	1.69744	0	393
GO_CARDIOVASCULAR_SYSTEM_DEVELOPMENT	0.00662252	0.030828	0.325046	1.69744	0	393
MORF_RAP1A	0.003663	0.025207	0.381098	1.69717	0	110
GSE42021_TCONV_PLN_VS_TREG_PRECURSORS_THYMUS_UP	0.00403226	0.025207	0.369622	1.69716	0	138
TTGGGAG,MIR-150	0.00321543	0.025207	0.412921	1.69666	0	71
GO_CELL_CYCLE_CHECKPOINT	0.00456621	0.025207	0.357679	1.6952	0	165
GO_CARDIAC_MUSCLE_CELL_DIFFERENTIATION	0.00810811	0.0354301	0.476988	1.69519	2	35
GO_SISTER_CHROMATID_COHESION	0.00352113	0.025207	0.388178	1.6946	0	97
GSE15735_2H_VS_12H_HDAC_INHIBITOR_TREATED_CD4_TCELL_DN	0.00440529	0.025207	0.362525	1.6943	0	153
GSE12001_MIR223_KO_VS_WT_NEUTROPHIL_DN	0.00460829	0.025207	0.359761	1.69398	0	158
BIOCARTA_P53HYPOXIA_PATHWAY	0.0165094	0.0589774	0.567675	1.69383	6	18
GSE11057_CD4_CENT_MEM_VS_PBMC_UP	0.00458716	0.025207	0.360215	1.69329	0	157
GSE14000_UNSTIM_VS_16H_LPS_DC_TRANSLATED_RNA_DN	0.00401606	0.025207	0.378433	1.69313	0	125
NIKOLSKY_BREAST_CANCER_19Q13.1_AMPLICON	0.0191388	0.0655259	0.554259	1.69295	7	20
GSE13411_NAIVE_VS_MEMORY_BCELL_UP	0.00321543	0.025207	0.412002	1.69288	0	71
GSE16385_IFNG_TNF_VS_UNSTIM_MACROPHAGE_ROSIGLITAZONE_TREATED_DN	0.00452489	0.025207	0.358186	1.69255	0	159
SIMBULAN_UV_RESPONSE_NORMAL_DN	0.0191388	0.0655259	0.553925	1.69193	7	20
V$RP58_01	0.00332226	0.025207	0.397261	1.69165	0	85
GSE24634_TEFF_VS_TCONV_DAY10_IN_CULTURE_UP	0.00444444	0.025207	0.366551	1.69157	0	149
GSE33162_UNTREATED_VS_4H_LPS_STIM_HDAC3_HET_MACROPHAGE_DN	0.00421941	0.025207	0.36896	1.69154	0	142
GO_CHROMOSOME_SEGREGATION	0.00480769	0.025207	0.345109	1.68998	0	227
GSE12963_UNINF_VS_ENV_AND_NEF_DEFICIENT_HIV1_INF_CD4_TCELL_DN	0.00332226	0.025207	0.39686	1.68994	0	85
GO_CELL_CYCLE_PHASE_TRANSITION	0.00480769	0.025207	0.343995	1.68986	0	230
GSE411_WT_VS_SOCS3_KO_MACROPHAGE_IL6_STIM_400MIN_UP	0.00416667	0.025207	0.371579	1.68961	0	134
PID_INSULIN_PATHWAY	0.0107817	0.0427801	0.456213	1.68945	3	39
GSE13306_RA_VS_UNTREATED_MEM_CD4_TCELL_DN	0.00392157	0.025207	0.37172	1.68922	0	130
ABRAMSON_INTERACT_WITH_AIRE	0.00840336	0.0362568	0.446461	1.68913	2	43
AAGTCCA,MIR-422B,MIR-422A	0.00566572	0.0277296	0.453069	1.68837	1	42
GSE7348_LPS_VS_TOLERIZED_AND_LPS_STIM_MACROPHAGE_UP	0.00460829	0.025207	0.358533	1.6882	0	158
DORN_ADENOVIRUS_INFECTION_12HR_DN	0.0223881	0.0737528	0.531292	1.68811	8	23
MARZEC_IL2_SIGNALING_UP	0.00321543	0.025207	0.409435	1.6878	0	72
GO_PROTEIN_K48_LINKED_DEUBIQUITINATION	0.0234192	0.0761896	0.572492	1.68734	9	17
ATGCTGC,MIR-103,MIR-107	0.0042735	0.025207	0.366755	1.68722	0	146
GSE21033_CTRL_VS_POLYIC_STIM_DC_1H_DN	0.00389105	0.025207	0.37774	1.68667	0	122
GSE43863_TFH_VS_LY6C_INT_CXCR5POS_EFFECTOR_CD4_TCELL_DN	0.00353357	0.025207	0.378938	1.68651	0	108
LUI_THYROID_CANCER_PAX8_PPARG_UP	0.0106101	0.0422376	0.475197	1.68638	3	34
GO_NEGATIVE_REGULATION_OF_EXTRINSIC_APOPTOTIC_SIGNALING_PATHWAY_VIA_DEATH_DOMAIN_RECEPTORS	0.019656	0.066953	0.535553	1.68594	7	22
NUNODA_RESPONSE_TO_DASATINIB_IMATINIB_UP	0.0127226	0.0485317	0.51276	1.68581	4	27
GSE16450_IMMATURE_VS_MATURE_NEURON_CELL_LINE_12H_IFNA_STIM_DN	0.00440529	0.025207	0.360689	1.68571	0	153
GSE32901_NAIVE_VS_TH17_NEG_CD4_TCELL_DN	0.00613497	0.0295169	0.421857	1.68555	1	57
GO_ESTABLISHMENT_OR_MAINTENANCE_OF_CELL_POLARITY	0.00334448	0.025207	0.392834	1.68538	0	88
GO_ATPASE_ACTIVITY	0.0060241	0.0291518	0.330401	1.68534	0	325
GSE37416_0H_VS_3H_F_TULARENSIS_LVS_NEUTROPHIL_DN	0.00452489	0.025207	0.356651	1.6853	0	159
ONDER_CDH1_TARGETS_1_DN	0.00362319	0.025207	0.380808	1.68524	0	107
GO_NEGATIVE_REGULATION_OF_DEPHOSPHORYLATION	0.00297619	0.025207	0.436203	1.68476	0	49
KRASNOSELSKAYA_ILF3_TARGETS_DN	0.0125	0.0479568	0.513748	1.68435	4	25
GSE8384_CTRL_VS_B_ABORTUS_4H_MAC_CELL_LINE_DN	0.00460829	0.025207	0.357659	1.68409	0	158
HALLMARK_WNT_BETA_CATENIN_SIGNALING	0.0154242	0.0559703	0.498828	1.68324	5	29
PID_IFNG_PATHWAY	0.0106101	0.0422376	0.466279	1.68275	3	36
ODONNELL_TFRC_TARGETS_DN	0.00362319	0.025207	0.381219	1.68258	0	103
GO_FOREBRAIN_DEVELOPMENT	0.00454545	0.025207	0.353902	1.68245	0	166
GO_REGULATION_OF_PROTEIN_COMPLEX_DISASSEMBLY	0.00465116	0.025207	0.354969	1.68235	0	168
GSE37416_0H_VS_12H_F_TULARENSIS_LVS_NEUTROPHIL_DN	0.00452489	0.025207	0.355193	1.68226	0	163
GGCAGTG,MIR-324-3P	0.00315457	0.025207	0.405517	1.68213	0	73
GCM_PTK2	0.00408163	0.025207	0.380585	1.68142	0	120
ST_T_CELL_SIGNAL_TRANSDUCTION	0.0127226	0.0485317	0.485898	1.6814	4	31
SENESE_HDAC2_TARGETS_UP	0.00320513	0.025207	0.397353	1.68078	0	81
GO_NUCLEOCYTOPLASMIC_TRANSPORTER_ACTIVITY	0.019656	0.066953	0.533876	1.68066	7	22
GSE17974_CTRL_VS_ACT_IL4_AND_ANTI_IL12_72H_CD4_TCELL_UP	0.00421941	0.025207	0.365612	1.68004	0	144
GSE17301_CTRL_VS_48H_ACD3_ACD28_IFNA2_STIM_CD8_TCELL_DN	0.00436681	0.025207	0.36008	1.67965	0	152
MODULE_110	0.0257611	0.0815015	0.578379	1.67941	10	16
PIGF_UP.V1_UP	0.0045045	0.025207	0.362998	1.6792	0	150
GO_RNA_POLYMERASE_II_TRANSCRIPTION_COACTIVATOR_ACTIVITY	0.019656	0.066953	0.533253	1.6787	7	22
GO_CELLULAR_RESPONSE_TO_GLUCOSE_STARVATION	0.015	0.054844	0.498962	1.67833	5	28
ATAAGCT,MIR-21	0.00320513	0.025207	0.39664	1.67777	0	81
ACAGGGT,MIR-10A,MIR-10B	0.00320513	0.025207	0.39662	1.67768	0	81
GO_CD4_POSITIVE_ALPHA_BETA_T_CELL_ACTIVATION	0.0215311	0.0716736	0.549079	1.67713	8	20
GSE3982_EFF_MEMORY_CD4_TCELL_VS_TH2_UP	0.00357143	0.025207	0.379399	1.67699	0	102
GO_MYELOID_LEUKOCYTE_DIFFERENTIATION	0.00304878	0.025207	0.425664	1.67668	0	53
V$PTF1BETA_Q6	0.00389105	0.025207	0.375488	1.67661	0	122
MARIADASON_REGULATED_BY_HISTONE_ACETYLATION_DN	0.00824176	0.0358613	0.44921	1.67645	2	41
GO_GOLGI_TO_ENDOSOME_TRANSPORT	0.0234192	0.0761896	0.568688	1.67613	9	17
GO_REGULATION_OF_NERVOUS_SYSTEM_DEVELOPMENT	0.00636943	0.0300167	0.323407	1.67583	0	361
GO_RESPONSE_TO_ALKALOID	0.0030581	0.025207	0.414865	1.6754	0	63
ESC_J1_UP_EARLY.V1_DN	0.00353357	0.025207	0.376305	1.67479	0	108
JAEGER_METASTASIS_UP	0.0127226	0.0485317	0.509402	1.67477	4	27
GO_APOPTOTIC_SIGNALING_PATHWAY	0.00485437	0.025207	0.347552	1.67454	0	212
GAGCCTG,MIR-484	0.00321543	0.025207	0.406138	1.67421	0	72
V$PR_02	0.003125	0.025207	0.402731	1.67402	0	75
CTCCAAG,MIR-432	0.00301205	0.025207	0.421619	1.67401	0	54
GO_POSITIVE_REGULATION_OF_PROTEIN_DEACETYLATION	0.0277136	0.0858652	0.585831	1.67356	11	15
GO_REGULATION_OF_FATTY_ACID_BIOSYNTHETIC_PROCESS	0.0212264	0.0708717	0.560754	1.67318	8	18
CHARAFE_BREAST_CANCER_BASAL_VS_MESENCHYMAL_DN	0.017284	0.0610366	0.516788	1.67279	6	24
HAHTOLA_SEZARY_SYNDROM_DN	0.028103	0.0865688	0.576065	1.67269	11	16
KIM_ALL_DISORDERS_OLIGODENDROCYTE_NUMBER_CORR_DN	0.028103	0.0865688	0.576061	1.67268	11	16
V$TFIIA_Q6	0.00421941	0.025207	0.363974	1.67252	0	144
GO_ORGAN_MORPHOGENESIS	0.00625	0.0297483	0.322452	1.6724	0	357
GSE13738_RESTING_VS_TCR_ACTIVATED_CD4_TCELL_UP	0.003861	0.025207	0.367845	1.67182	0	129
GSE21546_UNSTIM_VS_ANTI_CD3_STIM_DP_THYMOCYTES_DN	0.0042735	0.025207	0.363207	1.67089	0	146
BIOCARTA_KERATINOCYTE_PATHWAY	0.0106101	0.0422376	0.462986	1.67087	3	36
GSE36888_STAT5_AB_KNOCKIN_VS_WT_TCELL_IL2_TREATED_6H_DN	0.00452489	0.025207	0.353571	1.67074	0	159
HELLER_HDAC_TARGETS_SILENCED_BY_METHYLATION_DN	0.00487805	0.025207	0.341511	1.6705	0	224
IZADPANAH_STEM_CELL_ADIPOSE_VS_BONE_DN	0.00849858	0.0365023	0.44813	1.66997	2	42
UZONYI_RESPONSE_TO_LEUKOTRIENE_AND_THROMBIN	0.0141509	0.0524202	0.552724	1.66962	5	19
GSE7568_CTRL_VS_3H_TGFB_TREATED_MACROPHAGES_WITH_IL4_AND_DEXAMETHASONE_DN	0.00421941	0.025207	0.363295	1.66939	0	144
REACTOME_SIGNALING_BY_FGFR1_FUSION_MUTANTS	0.0235849	0.0765232	0.559219	1.6686	9	18
GSE20727_CTRL_VS_H2O2_TREATED_DC_DN	0.004329	0.025207	0.360923	1.66848	0	147
GO_MICROTUBULE_CYTOSKELETON_ORGANIZATION_INVOLVED_IN_MITOSIS	0.00810811	0.0354301	0.469468	1.66846	2	35
GO_MITOTIC_SPINDLE_ASSEMBLY	0.00810811	0.0354301	0.469468	1.66846	2	35
GO_SOMATIC_DIVERSIFICATION_OF_IMMUNE_RECEPTORS_VIA_GERMLINE_RECOMBINATION_WITHIN_A_SINGLE_LOCUS	0.015	0.054844	0.495877	1.66795	5	28
GO_SOMATIC_CELL_DNA_RECOMBINATION	0.015	0.054844	0.495877	1.66795	5	28
ACATATC,MIR-190	0.00842697	0.0362765	0.437522	1.66773	2	45
REACTOME_TRAF6_MEDIATED_NFKB_ACTIVATION	0.0235849	0.0765232	0.558915	1.66769	9	18
GSE29949_MICROGLIA_VS_DC_BRAIN_UP	0.00406504	0.025207	0.363399	1.6673	0	136
REN_BOUND_BY_E2F	0.00925926	0.038301	0.412616	1.66708	2	60
LIM_MAMMARY_STEM_CELL_UP	0.00444444	0.025207	0.34586	1.66619	0	182
ATGCAGT,MIR-217	0.00320513	0.025207	0.393892	1.66614	0	81
GO_ALPHA_BETA_T_CELL_ACTIVATION	0.0155844	0.0563983	0.489198	1.66581	5	30
GSE12845_IGD_POS_BLOOD_VS_NAIVE_TONSIL_BCELL_DN	0.00473934	0.025207	0.352506	1.66574	0	174
GO_ORGANELLE_FISSION	0.00662252	0.030828	0.318958	1.66565	0	393
BENPORATH_ES_2	0.017284	0.0610366	0.514508	1.66541	6	24
GO_DNA_INTEGRITY_CHECKPOINT	0.00401606	0.025207	0.371551	1.6649	0	127
GO_TRANSCRIPTION_FACTOR_COMPLEX	0.00478469	0.025207	0.34502	1.6648	0	197
GO_CELLULAR_RESPONSE_TO_EXTERNAL_STIMULUS	0.00444444	0.025207	0.350668	1.66465	0	164
GO_NUCLEAR_CHROMOSOME_SEGREGATION	0.00454545	0.025207	0.346959	1.66393	0	185
GSE25123_CTRL_VS_IL4_STIM_PPARG_KO_MACROPHAGE_DN	0.00389105	0.025207	0.377082	1.66383	0	115
ADDYA_ERYTHROID_DIFFERENTIATION_BY_HEMIN	0.00611621	0.0294905	0.41903	1.66378	1	55
GSE44649_WT_VS_MIR155_KO_ACTIVATED_CD8_TCELL_UP	0.00444444	0.025207	0.357554	1.66364	0	151
GO_MITOTIC_NUCLEAR_DIVISION	0.00584795	0.0284647	0.326193	1.66358	0	317
DORSAM_HOXA9_TARGETS_DN	0.017284	0.0610366	0.513914	1.66348	6	24
GO_ALPHA_BETA_T_CELL_DIFFERENTIATION	0.015	0.054844	0.50721	1.66291	5	25
NICK_RESPONSE_TO_PROC_TREATMENT_DN	0.015	0.054844	0.507038	1.66235	5	25
GSE18791_CTRL_VS_NEWCASTLE_VIRUS_DC_8H_DN	0.00403226	0.025207	0.376627	1.66223	0	119
HOFFMANN_LARGE_TO_SMALL_PRE_BII_LYMPHOCYTE_DN	0.00831025	0.0360417	0.438105	1.66192	2	44
GSE26495_PD1HIGH_VS_PD1LOW_CD8_TCELL_UP	0.00352113	0.025207	0.380625	1.66163	0	97
HOELZEL_NF1_TARGETS_UP	0.00615385	0.0295757	0.409837	1.66102	1	61
GSE3982_MEMORY_CD4_TCELL_VS_TH2_UP	0.00409836	0.025207	0.362938	1.66097	0	139
FERREIRA_EWINGS_SARCOMA_UNSTABLE_VS_STABLE_UP	0.00403226	0.025207	0.36173	1.66092	0	138
FRASOR_RESPONSE_TO_ESTRADIOL_UP	0.030445	0.0918101	0.571923	1.66067	12	16
TATTATA,MIR-374	0.0047619	0.025207	0.346235	1.65989	0	194
GSE9988_LOW_LPS_VS_ANTI_TREM1_AND_LPS_MONOCYTE_DN	0.00421941	0.025207	0.367247	1.65972	0	133
GSE36891_POLYIC_TLR3_VS_PAM_TLR2_STIM_PERITONEAL_MACROPHAGE_UP	0.00320513	0.025207	0.390385	1.65969	0	82
GO_NEGATIVE_REGULATION_OF_I_KAPPAB_KINASE_NF_KAPPAB_SIGNALING	0.0132979	0.050223	0.455339	1.65946	4	37
GSE37416_0H_VS_6H_F_TULARENSIS_LVS_NEUTROPHIL_DN	0.00458716	0.025207	0.351135	1.65938	0	160
SCHAEFFER_SOX9_TARGETS_IN_PROSTATE_DEVELOPMENT_DN	0.0127226	0.0485317	0.479454	1.6591	4	31
CACTTTG,MIR-520G,MIR-520H	0.00469484	0.025207	0.354759	1.65863	0	156
GSE14000_UNSTIM_VS_4H_LPS_DC_DN	0.00414938	0.025207	0.363477	1.65852	0	135
P53_DN.V2_UP	0.00284091	0.025207	0.429028	1.65772	0	48
V$FOXO1_02	0.00421941	0.025207	0.362467	1.65762	0	141
IL2_UP.V1_UP	0.00334448	0.025207	0.386341	1.65752	0	88
GO_DEVELOPMENTAL_GROWTH	0.00460829	0.025207	0.349441	1.65725	0	175
GSE40274_IRF4_VS_FOXP3_AND_IRF4_TRANSDUCED_ACTIVATED_CD4_TCELL_DN	0.00842697	0.0362765	0.434742	1.65713	2	45
DELPUECH_FOXO3_TARGETS_DN	0.0106101	0.0422376	0.45911	1.65688	3	36
GSE31082_DN_VS_CD8_SP_THYMOCYTE_DN	0.0045045	0.025207	0.35813	1.65668	0	150
HINATA_NFKB_TARGETS_FIBROBLAST_UP	0.00284091	0.025207	0.428744	1.65662	0	48
MORF_PTPN9	0.00840336	0.0362568	0.437804	1.65638	2	43
XU_CREBBP_TARGETS_DN	0.0127226	0.0485317	0.47865	1.65632	4	31
GO_MODULATION_OF_TRANSCRIPTION_IN_OTHER_ORGANISM_INVOLVED_IN_SYMBIOTIC_INTERACTION	0.028103	0.0865688	0.561925	1.65619	11	17
MORF_LTK	0.00314465	0.025207	0.395421	1.65612	0	76
GO_DNA_SYNTHESIS_INVOLVED_IN_DNA_REPAIR	0.0031746	0.025207	0.409484	1.65569	0	66
REACTOME_PERK_REGULATED_GENE_EXPRESSION	0.017284	0.0610366	0.511438	1.65547	6	24
PID_CASPASE_PATHWAY	0.010989	0.0434734	0.443588	1.65546	3	41
BIOCARTA_EGF_PATHWAY	0.0175	0.0616081	0.492145	1.6554	6	28
PID_FCER1_PATHWAY	0.00906344	0.03813	0.426553	1.65513	2	50
GSE32034_UNTREATED_VS_ROSIGLIZATONE_TREATED_LY6C_LOW_MONOCYTE_UP	0.00314465	0.025207	0.395178	1.6551	0	76
DORN_ADENOVIRUS_INFECTION_12HR_UP	0.0277136	0.0858652	0.579273	1.65483	11	15
GSE36392_TYPE_2_MYELOID_VS_NEUTROPHIL_IL25_TREATED_LUNG_UP	0.00403226	0.025207	0.374906	1.65463	0	119
GO_ESTABLISHMENT_OF_CELL_POLARITY	0.00611621	0.0294905	0.416704	1.65454	1	55
GO_REGULATION_OF_CELL_JUNCTION_ASSEMBLY	0.00849858	0.0365023	0.443918	1.65427	2	42
GO_PEPTIDYL_TYROSINE_AUTOPHOSPHORYLATION	0.017284	0.0610366	0.51103	1.65415	6	24
GSE46606_UNSTIM_VS_CD40L_IL2_IL5_1DAY_STIMULATED_IRF4_KO_BCELL_DN	0.00406504	0.025207	0.360329	1.65374	0	137
MORF_PPP5C	0.00320513	0.025207	0.3909	1.65349	0	81
GSE21670_STAT3_KO_VS_WT_CD4_TCELL_TGFB_TREATED_UP	0.00465116	0.025207	0.348785	1.65304	0	168
PID_NFKAPPAB_CANONICAL_PATHWAY	0.0215311	0.0716736	0.541077	1.65269	8	20
GENTILE_UV_RESPONSE_CLUSTER_D1	0.0300231	0.0907637	0.57815	1.65162	12	15
GSE40274_FOXP3_VS_FOXP3_AND_GATA1_TRANSDUCED_ACTIVATED_CD4_TCELL_UP	0.00320513	0.025207	0.388358	1.65107	0	82
EGFR_UP.V1_DN	0.00420168	0.025207	0.361144	1.65091	0	140
GO_DNA_DEPENDENT_DNA_REPLICATION_MAINTENANCE_OF_FIDELITY	0.0235849	0.0765232	0.553251	1.65079	9	18
GSE9316_IL6_KO_VS_IFNG_KO_INVIVO_EXPANDED_CD4_TCELL_DN	0.00389105	0.025207	0.364892	1.65053	0	128
SENGUPTA_NASOPHARYNGEAL_CARCINOMA_WITH_LMP1_UP	0.00485437	0.025207	0.333273	1.65052	0	242
GO_RESPONSE_TO_COCAINE	0.0223881	0.0737528	0.519224	1.64977	8	23
GO_EXECUTION_PHASE_OF_APOPTOSIS	0.00840336	0.0362568	0.436055	1.64976	2	43
GSE4984_UNTREATED_VS_LPS_TREATED_DC_UP	0.003663	0.025207	0.37044	1.6497	0	110
TGAYRTCA_V$ATF3_Q6	0.00574713	0.0280456	0.329147	1.6496	0	286
GO_REGULATION_OF_JUN_KINASE_ACTIVITY	0.00906344	0.03813	0.425104	1.64951	2	50
GCM_CRKL	0.00925926	0.038301	0.408256	1.64946	2	60
GSE9037_CTRL_VS_LPS_4H_STIM_BMDM_DN	0.004329	0.025207	0.356694	1.64893	0	147
GSE13547_2H_VS_12_H_ANTI_IGM_STIM_BCELL_UP	0.00392157	0.025207	0.36285	1.64891	0	130
BIOCARTA_IGF1R_PATHWAY	0.0217918	0.0722167	0.531853	1.64874	8	21
GSE14769_UNSTIM_VS_120MIN_LPS_BMDM_DN	0.004329	0.025207	0.356611	1.64855	0	147
GSE11884_WT_VS_FURIN_KO_NAIVE_CD4_TCELL_DN	0.00321543	0.025207	0.391636	1.64845	0	80
GSE20152_SPHK1_KO_VS_HTNFA_OVEREXPRESS_ANKLE_UP	0.00401606	0.025207	0.367618	1.64728	0	127
GO_ESC_E_Z_COMPLEX	0.0300231	0.0907637	0.576519	1.64696	12	15
ATCTTGC,MIR-31	0.00892857	0.0379215	0.419589	1.64667	2	52
GO_TRANSCRIPTION_FACTOR_BINDING	0.00613497	0.0295169	0.316306	1.64662	0	373
REACTOME_PRE_NOTCH_TRANSCRIPTION_AND_TRANSLATION	0.0165094	0.0589774	0.545079	1.64652	6	19
GO_RAB_GTPASE_BINDING	0.00334448	0.025207	0.382894	1.64625	0	90
BIOCARTA_NFKB_PATHWAY	0.0259434	0.0819678	0.551608	1.64589	10	18
GO_RESPONSE_TO_MECHANICAL_STIMULUS	0.00362319	0.025207	0.372763	1.64526	0	103
GSE17974_IL4_AND_ANTI_IL12_VS_UNTREATED_48H_ACT_CD4_TCELL_DN	0.00344828	0.025207	0.376537	1.64468	0	96
MORF_BUB1B	0.0030581	0.025207	0.407237	1.64459	0	63
GO_REGULATION_OF_ADHERENS_JUNCTION_ORGANIZATION	0.0101266	0.0409486	0.470069	1.64376	3	32
GENTLES_LEUKEMIC_STEM_CELL_UP	0.0351288	0.10135	0.566088	1.64372	14	16
GSE1791_CTRL_VS_NEUROMEDINU_IN_T_CELL_LINE_0.8H_DN	0.00314465	0.025207	0.391297	1.64371	0	78
GSE17974_1H_VS_72H_UNTREATED_IN_VITRO_CD4_TCELL_UP	0.00460829	0.025207	0.349034	1.64348	0	158
V$TEF1_Q6	0.003663	0.025207	0.369038	1.64346	0	110
KEGG_NOD_LIKE_RECEPTOR_SIGNALING_PATHWAY	0.0107817	0.0427801	0.44089	1.64331	3	40
GCTTGAA,MIR-498	0.00310559	0.025207	0.391004	1.64286	0	77
GO_REGULATION_OF_DNA_REPAIR	0.00925926	0.038301	0.406494	1.64234	2	60
GSE2706_UNSTIM_VS_2H_LPS_DC_UP	0.00421941	0.025207	0.363401	1.64234	0	133
GO_TRANSCRIPTIONAL_REPRESSOR_COMPLEX	0.00615385	0.0295757	0.40518	1.64215	1	61
GO_MICROTUBULE_BASED_PROCESS	0.00625	0.0297483	0.314921	1.64206	0	378
GO_CIRCADIAN_RHYTHM	0.003125	0.025207	0.395016	1.64195	0	75
GO_GOLGI_TO_VACUOLE_TRANSPORT	0.017284	0.0610366	0.50725	1.64191	6	24
GO_BLASTOCYST_DEVELOPMENT	0.00831025	0.0360417	0.432765	1.64166	2	44
GSE2770_TGFB_AND_IL4_VS_IL12_TREATED_ACT_CD4_TCELL_2H_DN	0.00420168	0.025207	0.364082	1.64164	0	132
AACTGGA,MIR-145	0.00465116	0.025207	0.346312	1.64132	0	168
GO_POSITIVE_REGULATION_OF_SYNAPTIC_TRANSMISSION	0.0107817	0.0427801	0.443062	1.64075	3	39
GSE18791_CTRL_VS_NEWCASTLE_VIRUS_DC_12H_DN	0.004	0.025207	0.369295	1.6405	0	124
GO_FACE_DEVELOPMENT	0.0178117	0.0625074	0.49897	1.64048	6	27
V$PAX5_01	0.00352113	0.025207	0.37422	1.64028	0	98
GO_OLFACTORY_LOBE_DEVELOPMENT	0.0327869	0.0966213	0.5565	1.6402	13	17
V$LHX3_01	0.00332226	0.025207	0.385022	1.63953	0	85
GO_NONMOTILE_PRIMARY_CILIUM_ASSEMBLY	0.022113	0.0730091	0.52062	1.63893	8	22
GSE30962_ACUTE_VS_CHRONIC_LCMV_SECONDARY_INF_CD8_TCELL_DN	0.00469484	0.025207	0.350448	1.63847	0	156
V$HLF_01	0.00452489	0.025207	0.346644	1.63801	0	159
GO_ACTIVATION_OF_JUN_KINASE_ACTIVITY	0.0197531	0.0672321	0.506043	1.63801	7	24
GO_SMAD_BINDING	0.00297619	0.025207	0.424044	1.63779	0	49
AAGWWRNYGGC_UNKNOWN	0.00344828	0.025207	0.374924	1.63763	0	96
GSE17721_PAM3CSK4_VS_GADIQUIMOD_8H_BMDC_DN	0.00444444	0.025207	0.351824	1.63698	0	151
LU_EZH2_TARGETS_DN	0.00574713	0.0280456	0.325912	1.6369	0	281
GSE20500_CTRL_VS_RETINOIC_ACID_TREATED_CD4_TCELL_DN	0.00389105	0.025207	0.370417	1.63666	0	117
GO_SEX_CHROMOSOME	0.022113	0.0730091	0.519767	1.63625	8	22
GSE15750_DAY6_VS_DAY10_EFF_CD8_TCELL_UP	0.0047619	0.025207	0.345554	1.63613	0	173
BIOCARTA_AKT_PATHWAY	0.0188679	0.0649993	0.541548	1.63586	7	19
WU_APOPTOSIS_BY_CDKN1A_VIA_TP53	0.00906344	0.03813	0.421463	1.63538	2	50
GSE17721_CTRL_VS_CPG_12H_BMDC_DN	0.00393701	0.025207	0.366991	1.63468	0	123
GO_REGULATION_OF_OSSIFICATION	0.00320513	0.025207	0.386374	1.63434	0	81
MASSARWEH_RESPONSE_TO_ESTRADIOL	0.0162602	0.0582274	0.444441	1.6342	5	38
GO_REGULATION_OF_EXTRINSIC_APOPTOTIC_SIGNALING_PATHWAY	0.00334448	0.025207	0.380055	1.63404	0	90
GSE27859_MACROPHAGE_VS_CD11C_INT_F480_HI_MACROPHAGE_UP	0.00420168	0.025207	0.357304	1.63336	0	140
BCAT_GDS748_UP	0.0175	0.0616081	0.485588	1.63334	6	28
BURTON_ADIPOGENESIS_3	0.00331126	0.025207	0.381136	1.63325	0	86
SHIN_B_CELL_LYMPHOMA_CLUSTER_7	0.022113	0.0730091	0.51851	1.63229	8	22
MORF_CNTN1	0.00321543	0.025207	0.397088	1.6316	0	71
GSE19401_PAM2CSK4_VS_RETINOIC_ACID_STIM_FOLLICULAR_DC_DN	0.00389105	0.025207	0.36916	1.6311	0	117
GO_MICROTUBULE	0.00552486	0.0272301	0.324254	1.63082	0	288
GSE4142_NAIVE_BCELL_VS_PLASMA_CELL_DN	0.00416667	0.025207	0.358637	1.63076	0	134
GO_EMBRYONIC_SKELETAL_SYSTEM_MORPHOGENESIS	0.0134771	0.0507131	0.440312	1.63057	4	39
TACGGGT,MIR-99A,MIR-100,MIR-99B	0.0327869	0.0966213	0.553127	1.63026	13	17
GSE3039_ALPHABETA_CD8_TCELL_VS_B2_BCELL_UP	0.0041841	0.025207	0.353133	1.63024	0	145
GSE37301_PRO_BCELL_VS_CD4_TCELL_DN	0.00314465	0.025207	0.387959	1.62969	0	78
YUAN_ZNF143_PARTNERS	0.0239234	0.0773581	0.533351	1.62909	9	20
REACTOME_TAK1_ACTIVATES_NFKB_BY_PHOSPHORYLATION_AND_ACTIVATION_OF_IKKS_COMPLEX	0.0235849	0.0765232	0.539221	1.62883	9	19
GO_FEMALE_SEX_DIFFERENTIATION	0.0060241	0.0291518	0.410222	1.62875	1	54
AKT_UP_MTOR_DN.V1_UP	0.00357143	0.025207	0.368422	1.62847	0	102
GSE4590_LARGE_PRE_BCELL_VS_VPREB_POS_LARGE_PRE_BCELL_DN	0.00421941	0.025207	0.354378	1.62842	0	144
BIOCARTA_TNFR1_PATHWAY	0.0178117	0.0625074	0.495276	1.62833	6	27
GO_EMBRYONIC_SKELETAL_SYSTEM_DEVELOPMENT	0.0119048	0.0462859	0.414794	1.62786	3	52
GO_CHROMATIN	0.00621118	0.0296907	0.314536	1.62769	0	351
GO_SPINDLE	0.00505051	0.0257292	0.329092	1.62768	0	246
GSE21033_CTRL_VS_POLYIC_STIM_DC_6H_UP	0.00406504	0.025207	0.358201	1.62754	0	131
GO_NEURAL_TUBE_FORMATION	0.00318471	0.025207	0.397781	1.62726	0	69
GO_REGULATION_OF_AXONOGENESIS	0.00314465	0.025207	0.387311	1.62696	0	78
REACTOME_GAB1_SIGNALOSOME	0.0103627	0.0416099	0.461701	1.6268	3	33
CHANDRAN_METASTASIS_UP	0.00444444	0.025207	0.342659	1.62664	0	164
GTGCCTT,MIR-506	0.00900901	0.0381206	0.307304	1.62659	0	498
GSE9988_ANTI_TREM1_AND_LPS_VS_VEHICLE_TREATED_MONOCYTES_UP	0.00380228	0.025207	0.36635	1.62601	0	114
GSE37532_VISCERAL_ADIPOSE_TISSUE_VS_LN_DERIVED_TREG_CD4_TCELL_DN	0.00364964	0.025207	0.367461	1.62583	0	105
BOYAULT_LIVER_CANCER_SUBCLASS_G23_UP	0.00842697	0.0362765	0.426502	1.62572	2	45
MORF_DDX11	0.00371747	0.025207	0.364757	1.62563	0	112
GSE23308_WT_VS_MINERALCORTICOID_REC_KO_MACROPHAGE_DN	0.00406504	0.025207	0.357772	1.62559	0	131
GO_MEIOTIC_CELL_CYCLE_PROCESS	0.00340136	0.025207	0.377234	1.62524	0	93
GSE17721_POLYIC_VS_PAM3CSK4_1H_BMDC_DN	0.00389105	0.025207	0.359216	1.62485	0	128
ST_B_CELL_ANTIGEN_RECEPTOR	0.0108108	0.0428575	0.457165	1.62474	3	35
GO_NEURON_PROJECTION_GUIDANCE	0.00320513	0.025207	0.384041	1.62447	0	81
HOXA9_DN.V1_DN	0.00421941	0.025207	0.354247	1.62409	0	142
GO_REGULATION_OF_DNA_REPLICATION	0.00389105	0.025207	0.367394	1.6233	0	117
REACTOME_PI3K_CASCADE	0.00831025	0.0360417	0.423041	1.62324	2	46
GSE10211_UV_INACT_SENDAI_VS_LIVE_SENDAI_VIRUS_TRACHEAL_EPITHELIAL_CELLS_UP	0.00358423	0.025207	0.367149	1.62284	0	104
GO_FOREBRAIN_GENERATION_OF_NEURONS	0.0225	0.0739946	0.494938	1.62268	8	25
GCM_BMPR2	0.00314465	0.025207	0.387266	1.62196	0	76
MODULE_122	0.0106101	0.0422376	0.456914	1.6215	3	34
GARY_CD5_TARGETS_UP	0.00769231	0.0344951	0.309328	1.62148	0	427
GSE45365_HEALTHY_VS_MCMV_INFECTION_CD11B_DC_IFNAR_KO_UP	0.00406504	0.025207	0.356866	1.62147	0	131
HUTTMANN_B_CLL_POOR_SURVIVAL_DN	0.00555556	0.0273511	0.419315	1.62141	1	47
GCM_RBM8A	0.003125	0.025207	0.390059	1.62135	0	75
GSE37605_FOXP3_FUSION_GFP_VS_IRES_GFP_TREG_C57BL6_UP	0.00353357	0.025207	0.364213	1.62097	0	108
GO_REGULATION_OF_CYTOKINE_BIOSYNTHETIC_PROCESS	0.010989	0.0434734	0.434307	1.62083	3	41
GSE26351_UNSTIM_VS_WNT_PATHWAY_STIM_HEMATOPOIETIC_PROGENITORS_UP	0.00452489	0.025207	0.341066	1.62077	0	167
GSE40273_XBP1_KO_VS_WT_TREG_DN	0.00420168	0.025207	0.359419	1.62062	0	132
YNGTTNNNATT_UNKNOWN	0.0047619	0.025207	0.33615	1.62046	0	196
GO_REGULATION_OF_B_CELL_MEDIATED_IMMUNITY	0.0369515	0.105085	0.567091	1.62002	15	15
GSE3039_CD4_TCELL_VS_NKT_CELL_UP	0.0044843	0.025207	0.345406	1.61983	0	154
ACACTGG,MIR-199A,MIR-199B	0.00377358	0.025207	0.363779	1.61974	0	113
GO_DNA_POLYMERASE_ACTIVITY	0.0101266	0.0409486	0.463098	1.61938	3	32
GARGALOVIC_RESPONSE_TO_OXIDIZED_PHOSPHOLIPIDS_TURQUOISE_DN	0.00297619	0.025207	0.419214	1.61914	0	49
GSE43863_TFH_VS_LY6C_LOW_CXCR5NEG_EFFECTOR_CD4_TCELL_UP	0.00444444	0.025207	0.35085	1.61911	0	149
GSE17721_0.5H_VS_4H_CPG_BMDC_DN	0.00420168	0.025207	0.354166	1.61902	0	140
GO_EYE_DEVELOPMENT	0.00421941	0.025207	0.353937	1.61861	0	141
GSE12392_CD8A_POS_VS_NEG_SPLEEN_DC_DN	0.00460829	0.025207	0.343724	1.61847	0	158
GO_REGULATION_OF_GENE_SILENCING	0.0112045	0.0441425	0.427744	1.61831	3	43
SHEPARD_BMYB_MORPHOLINO_DN	0.00398406	0.025207	0.366894	1.61807	0	118
MORF_TNFRSF25	0.00401606	0.025207	0.361085	1.618	0	127
GSE35825_UNTREATED_VS_IFNG_STIM_MACROPHAGE_DN	0.00458716	0.025207	0.344181	1.61792	0	157
GO_EMBRYONIC_MORPHOGENESIS	0.00518135	0.0260769	0.326318	1.61764	0	254
GSE7852_LN_VS_THYMUS_TCONV_DN	0.00460829	0.025207	0.343725	1.61755	0	162
GSE40274_FOXP3_VS_FOXP3_AND_LEF1_TRANSDUCED_ACTIVATED_CD4_TCELL_DN	0.00389105	0.025207	0.362227	1.6174	0	122
GSE21927_SPLENIC_VS_TUMOR_MONOCYTES_FROM_C26GM_TUMOROUS_MICE_BALBC_DN	0.00458716	0.025207	0.340361	1.61693	0	169
GSE14026_TH1_VS_TH17_UP	0.00350877	0.025207	0.367876	1.61678	0	99
GO_SPINDLE_ASSEMBLY	0.0030581	0.025207	0.400226	1.61628	0	63
REACTOME_LOSS_OF_NLP_FROM_MITOTIC_CENTROSOMES	0.00917431	0.0382552	0.406711	1.61486	2	55
GSE37534_UNTREATED_VS_PIOGLITAZONE_TREATED_CD4_TCELL_PPARG1_AND_FOXP3_TRASDUCED_UP	0.00421941	0.025207	0.353077	1.61468	0	141
CHIANG_LIVER_CANCER_SUBCLASS_PROLIFERATION_UP	0.00421941	0.025207	0.352172	1.61457	0	142
YGCANTGCR_UNKNOWN	0.00320513	0.025207	0.381648	1.61435	0	81
CARD_MIR302A_TARGETS	0.00903614	0.0381206	0.406266	1.61305	2	54
GO_CENTROSOME	0.00699301	0.0321818	0.308975	1.61282	0	405
GSE14699_NAIVE_VS_DELETIONAL_TOLERANCE_CD8_TCELL_UP	0.00364964	0.025207	0.36411	1.61273	0	106
GSE6259_DEC205_POS_DC_VS_CD8_TCELL_DN	0.003125	0.025207	0.387803	1.61197	0	75
CHIANG_LIVER_CANCER_SUBCLASS_UNANNOTATED_UP	0.00831025	0.0360417	0.424934	1.61196	2	44
GO_PATTERN_SPECIFICATION_PROCESS	0.00454545	0.025207	0.336087	1.61179	0	185
GSE2405_0H_VS_12H_A_PHAGOCYTOPHILUM_STIM_NEUTROPHIL_DN	0.00421941	0.025207	0.351358	1.61084	0	142
GSE7509_UNSTIM_VS_TNFA_IL1B_IL6_PGE_STIM_DC_DN	0.0155844	0.0563983	0.473054	1.61083	5	30
BLALOCK_ALZHEIMERS_DISEASE_INCIPIENT_UP	0.00574713	0.0280456	0.320794	1.61047	0	284
GSE9037_WT_VS_IRAK4_KO_LPS_4H_STIM_BMDM_UP	0.00436681	0.025207	0.345232	1.61038	0	152
GSE40493_BCL6_KO_VS_WT_TREG_UP	0.00452489	0.025207	0.339918	1.60991	0	163
GO_FORMATION_OF_PRIMARY_GERM_LAYER	0.011236	0.0442273	0.422329	1.60981	3	45
GSE11961_MARGINAL_ZONE_BCELL_VS_GERMINAL_CENTER_BCELL_DAY40_UP	0.0044843	0.025207	0.343259	1.60976	0	154
GO_HISTONE_DEACETYLASE_BINDING	0.00320513	0.025207	0.378623	1.60968	0	82
GSE17721_PAM3CSK4_VS_CPG_0.5H_BMDC_UP	0.00436681	0.025207	0.348001	1.6096	0	148
TAAYNRNNTCC_UNKNOWN	0.00310559	0.025207	0.383086	1.60959	0	77
GSE14699_NAIVE_VS_ACT_CD8_TCELL_DN	0.00406504	0.025207	0.3508	1.6095	0	136
GSE5142_HTERT_TRANSDUCED_VS_CTRL_CD8_TCELL_LATE_PASSAGE_CLONE_DN	0.00452489	0.025207	0.33979	1.60931	0	163
GSE40655_FOXO1_KO_VS_WT_NTREG_UP	0.00444444	0.025207	0.338999	1.60926	0	164
GSE45365_WT_VS_IFNAR_KO_CD8A_DC_MCMV_INFECTION_UP	0.00460829	0.025207	0.341955	1.60922	0	162
PUJANA_BRCA2_PCC_NETWORK	0.00632911	0.030007	0.308236	1.60885	0	388
WATTEL_AUTONOMOUS_THYROID_ADENOMA_DN	0.0273632	0.0852749	0.506249	1.60854	10	23
V$E2F1_Q3_01	0.0046729	0.025207	0.339944	1.60815	0	176
GO_MITOTIC_G2_M_TRANSITION_CHECKPOINT	0.0491803	0.128892	0.553809	1.60807	20	16
GSE22229_RENAL_TRANSPLANT_VS_HEALTHY_PBMC_DN	0.00420168	0.025207	0.356635	1.60806	0	132
GO_REGULATION_OF_INTERLEUKIN_2_PRODUCTION	0.0225	0.0739946	0.490429	1.6079	8	25
GO_REGULATION_OF_INTERFERON_BETA_PRODUCTION	0.0134771	0.0507131	0.431377	1.60785	4	40
IVANOVA_HEMATOPOIESIS_STEM_CELL	0.00420168	0.025207	0.350753	1.60773	0	143
MULLIGHAN_NPM1_SIGNATURE_3_UP	0.00487805	0.025207	0.326782	1.6077	0	235
GSE2706_R848_VS_LPS_2H_STIM_DC_UP	0.00315457	0.025207	0.387538	1.60755	0	73
GO_B_CELL_HOMEOSTASIS	0.0330189	0.0970047	0.538562	1.60696	13	18
GO_MICROVILLUS_ORGANIZATION	0.039261	0.109802	0.562427	1.6067	16	15
GO_SKELETAL_SYSTEM_MORPHOGENESIS	0.00333333	0.025207	0.375325	1.60634	0	87
GSE23505_IL6_IL1_IL23_VS_IL6_IL1_TGFB_TREATED_CD4_TCELL_DN	0.00436681	0.025207	0.344351	1.60627	0	152
chr6q25	0.0189702	0.0652336	0.436789	1.60607	6	38
PID_FAK_PATHWAY	0.0110803	0.0437698	0.418411	1.60547	3	46
GO_NEGATIVE_REGULATION_OF_SMOOTHENED_SIGNALING_PATHWAY	0.0421546	0.114953	0.544613	1.60517	17	17
MORF_LMO1	0.0421546	0.114953	0.544472	1.60475	17	17
BIOCARTA_ATRBRCA_PATHWAY	0.0338983	0.098783	0.517635	1.60466	13	21
V$SMAD3_Q6	0.00357143	0.025207	0.365605	1.60408	0	100
WIEDERSCHAIN_TARGETS_OF_BMI1_AND_PCGF2	0.0178117	0.0625074	0.48783	1.60385	6	27
MORF_BRCA1	0.00471698	0.025207	0.338555	1.60352	0	172
GSE369_IFNG_KO_VS_WT_LIVER_UP	0.00452489	0.025207	0.341404	1.60304	0	155
GTGTTGA,MIR-505	0.003125	0.025207	0.385584	1.60274	0	75
GSE13522_CTRL_VS_T_CRUZI_Y_STRAIN_INF_SKIN_BALBC_MOUSE_DN	0.00320513	0.025207	0.37696	1.60261	0	82
GSE17974_1.5H_VS_72H_IL4_AND_ANTI_IL12_ACT_CD4_TCELL_UP	0.00458716	0.025207	0.339086	1.60243	0	160
GO_PROTEIN_LOCALIZATION_TO_GOLGI_APPARATUS	0.0155844	0.0563983	0.470583	1.60242	5	30
GO_RNA_POLYMERASE_II_DISTAL_ENHANCER_SEQUENCE_SPECIFIC_DNA_BINDING	0.0112045	0.0441425	0.423526	1.60235	3	43
GO_NEGATIVE_REGULATION_OF_CELL_CYCLE	0.00625	0.0297483	0.313642	1.60234	0	331
GO_CORE_PROMOTER_SEQUENCE_SPECIFIC_DNA_BINDING	0.0031746	0.025207	0.396264	1.60224	0	66
SUNG_METASTASIS_STROMA_DN	0.0112045	0.0441425	0.423334	1.60163	3	43
PID_RXR_VDR_PATHWAY	0.0330189	0.0970047	0.536702	1.60141	13	18
GO_MORPHOGENESIS_OF_EMBRYONIC_EPITHELIUM	0.00320513	0.025207	0.382102	1.60083	0	79
MORF_EIF4E	0.00321543	0.025207	0.380294	1.60071	0	80
GSE40277_GATA1_AND_SATB1_TRANSDUCED_VS_CTRL_CD4_TCELL_DN	0.00420168	0.025207	0.35491	1.60029	0	132
ENK_UV_RESPONSE_EPIDERMIS_DN	0.00636943	0.0300167	0.308765	1.59996	0	361
GO_PRESYNAPTIC_MEMBRANE	0.039261	0.109802	0.559932	1.59957	16	15
GSE28737_WT_VS_BCL6_HET_FOLLICULAR_BCELL_UP	0.00389105	0.025207	0.362514	1.59955	0	115
GSE42724_NAIVE_VS_MEMORY_BCELL_DN	0.0045045	0.025207	0.345726	1.5993	0	150
RAY_TUMORIGENESIS_BY_ERBB2_CDC25A_DN	0.00352113	0.025207	0.36634	1.59926	0	97
GSE25088_WT_VS_STAT6_KO_MACROPHAGE_IL4_STIM_DN	0.00444444	0.025207	0.343705	1.5992	0	151
ROYLANCE_BREAST_CANCER_16Q_COPY_NUMBER_UP	0.0106101	0.0422376	0.443034	1.59886	3	36
V$SP1_Q4_01	0.00465116	0.025207	0.335641	1.59885	0	181
GO_RESPONSE_TO_NICOTINE	0.0421546	0.114953	0.542339	1.59847	17	17
GO_MICROTUBULE_ASSOCIATED_COMPLEX	0.00358423	0.025207	0.361624	1.59842	0	104
PENG_LEUCINE_DEPRIVATION_UP	0.00371747	0.025207	0.35856	1.59801	0	112
REACTOME_ACTIVATED_AMPK_STIMULATES_FATTY_ACID_OXIDATION_IN_MUSCLE	0.039261	0.109802	0.559251	1.59763	16	15
GSE19923_WT_VS_E2A_KO_DP_THYMOCYTE_DN	0.00401606	0.025207	0.356537	1.59762	0	127
GSE6269_HEALTHY_VS_E_COLI_INF_PBMC_UP	0.00444444	0.025207	0.343317	1.5974	0	151
GSE32533_WT_VS_MIR17_KO_ACT_CD4_TCELL_UP	0.00362319	0.025207	0.361911	1.59736	0	103
ZHANG_ANTIVIRAL_RESPONSE_TO_RIBAVIRIN_DN	0.0225	0.0739946	0.474882	1.59733	8	28
GSE21063_3H_VS_16H_ANTI_IGM_STIM_BCELL_UP	0.00420168	0.025207	0.35419	1.59704	0	132
GO_CARDIOCYTE_DIFFERENTIATION	0.0112045	0.0441425	0.422111	1.597	3	43
MILI_PSEUDOPODIA_CHEMOTAXIS_UP	0.0124224	0.0478103	0.396737	1.5968	3	62
CTCAGGG,MIR-125B,MIR-125A	0.00478469	0.025207	0.324615	1.59678	0	233
GSE21063_WT_VS_NFATC1_KO_BCELL_DN	0.00465116	0.025207	0.335943	1.59604	0	179
GO_NEURON_PROJECTION_MORPHOGENESIS	0.00454545	0.025207	0.332798	1.59602	0	185
GSE40274_GATA1_VS_FOXP3_AND_GATA1_TRANSDUCED_ACTIVATED_CD4_TCELL_DN	0.00460829	0.025207	0.338905	1.59578	0	158
GSE3982_MEMORY_CD4_TCELL_VS_BCELL_UP	0.00334448	0.025207	0.370416	1.59575	0	92
TAATGTG,MIR-323	0.00392157	0.025207	0.359082	1.59564	0	121
GSE21380_NON_TFH_VS_GERMINAL_CENTER_TFH_CD4_TCELL_DN	0.00452489	0.025207	0.335758	1.59555	0	167
GO_POSITIVE_REGULATION_OF_DENDRITE_MORPHOGENESIS	0.0246914	0.079074	0.492877	1.59539	9	24
GO_CELLULAR_RESPONSE_TO_ALKALOID	0.039261	0.109802	0.558401	1.5952	16	15
TURASHVILI_BREAST_DUCTAL_CARCINOMA_VS_LOBULAR_NORMAL_DN	0.0287081	0.087945	0.522186	1.59499	11	20
MODULE_205	0.00438596	0.025207	0.330482	1.59498	0	183
ST_ERK1_ERK2_MAPK_PATHWAY	0.0225	0.0739946	0.474148	1.59486	8	28
GO_REGULATION_OF_P38MAPK_CASCADE	0.0491803	0.128892	0.549248	1.59483	20	16
V$EGR_Q6	0.00456621	0.025207	0.336468	1.59467	0	165
GO_REGULATION_OF_MYELOID_LEUKOCYTE_DIFFERENTIATION	0.00920245	0.0382552	0.399045	1.5944	2	57
GO_REPRODUCTIVE_SYSTEM_DEVELOPMENT	0.00483092	0.025207	0.331864	1.59377	0	199
GO_REGULATION_OF_CYTOKINESIS	0.0110803	0.0437698	0.415111	1.59281	3	46
MORF_FLT1	0.00833333	0.0361183	0.411903	1.59274	2	47
GO_RNA_HELICASE_ACTIVITY	0.00931677	0.0383486	0.397322	1.59274	2	59
PID_NFAT_TFPATHWAY	0.0363196	0.103819	0.513588	1.59212	14	21
GO_POSITIVE_REGULATION_OF_NEURON_APOPTOTIC_PROCESS	0.0132626	0.0501324	0.448574	1.5919	4	34
GO_NEGATIVE_REGULATION_OF_ORGANELLE_ORGANIZATION	0.00549451	0.0271608	0.314538	1.59182	0	300
GO_NUCLEAR_LOCALIZATION_SEQUENCE_BINDING	0.0400943	0.111245	0.53343	1.59165	16	18
GSE24210_IL35_TREATED_VS_RESTING_TREG_DN	0.0030581	0.025207	0.394064	1.59139	0	63
GSE2128_C57BL6_VS_NOD_THYMOCYTE_UP	0.00452489	0.025207	0.338924	1.59139	0	155
GO_CELL_CELL_ADHERENS_JUNCTION	0.0246914	0.079074	0.491635	1.59137	9	24
GSE2770_TGFB_AND_IL4_VS_TGFB_AND_IL12_TREATED_ACT_CD4_TCELL_6H_DN	0.00452489	0.025207	0.338891	1.59124	0	155
GSE41867_DAY8_VS_DAY15_LCMV_ARMSTRONG_EFFECTOR_CD8_TCELL_UP	0.0120846	0.0468348	0.410073	1.59118	3	50
GTAAGAT,MIR-200A	0.0189702	0.0652336	0.432724	1.59112	6	38
GSE2770_IL12_VS_TGFB_AND_IL12_TREATED_ACT_CD4_TCELL_48H_DN	0.00406504	0.025207	0.346527	1.5904	0	137
ATGTCAC,MIR-489	0.00903614	0.0381206	0.400502	1.59016	2	54
MORF_ERCC2	0.00331126	0.025207	0.370862	1.58923	0	86
GO_ACTIVATION_OF_MAPKK_ACTIVITY	0.0132626	0.0501324	0.440291	1.58896	4	36
GO_CONDENSED_NUCLEAR_CHROMOSOME	0.00928793	0.038301	0.398002	1.5889	2	58
GO_CELL_MORPHOGENESIS_INVOLVED_IN_DIFFERENTIATION	0.00480769	0.025207	0.323747	1.58873	0	232
DUTERTRE_ESTRADIOL_RESPONSE_24HR_DN	0.00588235	0.0285592	0.312835	1.58846	0	315
GO_CHROMOSOME_CENTROMERIC_REGION	0.0045045	0.025207	0.34332	1.58817	0	150
GSE14000_4H_VS_16H_LPS_DC_TRANSLATED_RNA_DN	0.00456621	0.025207	0.335016	1.58779	0	165
HALLMARK_HEDGEHOG_SIGNALING	0.0353774	0.101801	0.525625	1.58776	14	19
CTTTGCA,MIR-527	0.0044843	0.025207	0.33841	1.58702	0	154
BHAT_ESR1_TARGETS_NOT_VIA_AKT1_DN	0.0110803	0.0437698	0.413524	1.58672	3	46
GTTTGTT,MIR-495	0.0047619	0.025207	0.335116	1.58671	0	173
GSE40274_CTRL_VS_FOXP3_AND_HELIOS_TRANSDUCED_ACTIVATED_CD4_TCELL_UP	0.00458716	0.025207	0.337527	1.58664	0	157
MODULE_458	0.0415704	0.113943	0.555398	1.58662	17	15
GO_EMBRYONIC_ORGAN_MORPHOGENESIS	0.00408163	0.025207	0.359105	1.58652	0	120
REACTOME_G2_M_CHECKPOINTS	0.0137363	0.0514705	0.425029	1.5862	4	41
AFFAR_YY1_TARGETS_DN	0.00421941	0.025207	0.34684	1.58616	0	141
NIKOLSKY_BREAST_CANCER_17Q11_Q21_AMPLICON	0.00320513	0.025207	0.378512	1.58579	0	79
YTATTTTNR_V$MEF2_02	0.00625	0.0297483	0.30572	1.58562	0	357
V$TAXCREB_01	0.00340136	0.025207	0.367971	1.58533	0	93
MCBRYAN_PUBERTAL_BREAST_6_7WK_UP	0.00416667	0.025207	0.34862	1.58521	0	134
MODULE_125	0.00831025	0.0360417	0.417825	1.58499	2	44
IWANAGA_E2F1_TARGETS_INDUCED_BY_SERUM	0.025	0.0797368	0.471212	1.58498	9	28
NABA_SECRETED_FACTORS	0.00920245	0.0382552	0.396674	1.58493	2	57
GNF2_HMMR	0.0111111	0.0438654	0.409827	1.58472	3	47
GO_DEVELOPMENT_OF_PRIMARY_SEXUAL_CHARACTERISTICS	0.00357143	0.025207	0.358381	1.58408	0	102
GSE42021_CD24HI_TREG_VS_CD24HI_TCONV_THYMUS_DN	0.00420168	0.025207	0.351305	1.58403	0	132
GO_INSULIN_RECEPTOR_BINDING	0.0424528	0.115459	0.530655	1.58337	17	18
GO_R_SMAD_BINDING	0.0415704	0.113943	0.554009	1.58265	17	15
GSE23321_CENTRAL_VS_EFFECTOR_MEMORY_CD8_TCELL_UP	0.00403226	0.025207	0.344663	1.58256	0	138
GO_HEAD_DEVELOPMENT	0.00617284	0.0296243	0.303533	1.58182	0	371
REACTOME_PI_3K_CASCADE	0.0159151	0.0573599	0.438303	1.58179	5	36
CTGAGCC,MIR-24	0.0042735	0.025207	0.343809	1.58165	0	146
RODRIGUES_NTN1_AND_DCC_TARGETS	0.03	0.090735	0.482407	1.5816	11	25
LINDGREN_BLADDER_CANCER_CLUSTER_1_DN	0.00531915	0.0264608	0.31403	1.58116	0	272
GSE10240_CTRL_VS_IL22_STIM_PRIMARY_BRONCHIAL_EPITHELIAL_CELLS_UP	0.00421941	0.025207	0.349819	1.58096	0	133
GNF2_MCM4	0.0121951	0.0471125	0.401272	1.5806	3	53
GSE17721_12H_VS_24H_GARDIQUIMOD_BMDC_UP	0.00421941	0.025207	0.34972	1.58051	0	133
GARCIA_TARGETS_OF_FLI1_AND_DAX1_DN	0.00409836	0.025207	0.345326	1.58037	0	139
MULLIGHAN_NPM1_MUTATED_SIGNATURE_1_UP	0.00454545	0.025207	0.329437	1.5799	0	185
CACTGTG,MIR-128A,MIR-128B	0.00478469	0.025207	0.320666	1.57985	0	234
GO_CELL_SUBSTRATE_JUNCTION_ASSEMBLY	0.0400943	0.111245	0.522821	1.57929	16	19
GO_DEMETHYLATION	0.0137363	0.0514705	0.423165	1.57924	4	41
RADMACHER_AML_PROGNOSIS	0.0113314	0.04459	0.423769	1.57919	3	42
GSE21063_WT_VS_NFATC1_KO_16H_ANTI_IGM_STIM_BCELL_UP	0.00440529	0.025207	0.337852	1.57899	0	153
GO_BIOMINERAL_TISSUE_DEVELOPMENT	0.03	0.090735	0.48149	1.57859	11	25
MODULE_158	0.0112045	0.0441425	0.41724	1.57857	3	43
REACTOME_INTEGRIN_ALPHAIIB_BETA3_SIGNALING	0.0468384	0.124417	0.535488	1.57827	19	17
GO_EMBRYONIC_AXIS_SPECIFICATION	0.0424528	0.115459	0.528946	1.57827	17	18
GSE14415_NATURAL_TREG_VS_FOXP3_KO_NATURAL_TREG_DN	0.00357143	0.025207	0.356984	1.57791	0	102
REACTOME_PIP3_ACTIVATES_AKT_SIGNALING	0.0254453	0.0807706	0.479918	1.57784	9	27
V$ATF3_Q6	0.004329	0.025207	0.341312	1.57782	0	147
TTAYRTAA_V$E4BP4_01	0.00460829	0.025207	0.335249	1.57766	0	162
GSE17721_PAM3CSK4_VS_GADIQUIMOD_2H_BMDC_UP	0.00352113	0.025207	0.359931	1.57765	0	98
BIOCARTA_STRESS_PATHWAY	0.031941	0.0947992	0.501032	1.57727	12	22
GO_ANATOMICAL_STRUCTURE_FORMATION_INVOLVED_IN_MORPHOGENESIS	0.00869565	0.0372168	0.297702	1.57602	0	483
GO_CELLULAR_RESPONSE_TO_EXTRACELLULAR_STIMULUS	0.00389105	0.025207	0.352946	1.57596	0	122
GO_SPINDLE_LOCALIZATION	0.025	0.0797368	0.468415	1.57558	9	28
KIM_WT1_TARGETS_12HR_UP	0.00344828	0.025207	0.360651	1.57529	0	96
GO_BODY_MORPHOGENESIS	0.034398	0.0998464	0.500339	1.57509	13	22
CATRRAGC_UNKNOWN	0.00632911	0.030007	0.382584	1.57483	1	70
V$MEIS1_01	0.00403226	0.025207	0.342974	1.5748	0	138
GSE2770_IL12_AND_TGFB_ACT_VS_ACT_CD4_TCELL_48H_DN	0.00460829	0.025207	0.334611	1.57466	0	162
LIAO_HAVE_SOX4_BINDING_SITES	0.0298507	0.0903861	0.495552	1.57455	11	23
GO_INTERMEDIATE_FILAMENT	0.0254453	0.0807706	0.478881	1.57443	9	27
REACTOME_G0_AND_EARLY_G1	0.0323383	0.0956047	0.49545	1.57423	12	23
GSE11961_MARGINAL_ZONE_BCELL_VS_GERMINAL_CENTER_BCELL_DAY7_DN	0.00452489	0.025207	0.335219	1.574	0	155
GO_NAD_ADP_RIBOSYLTRANSFERASE_ACTIVITY	0.034398	0.0998464	0.499987	1.57398	13	22
GO_CONDENSED_CHROMOSOME	0.0044843	0.025207	0.335598	1.57383	0	154
ACAWNRNSRCGG_UNKNOWN	0.014881	0.0545185	0.401004	1.57374	4	52
GSE42088_UNINF_VS_LEISHMANIA_INF_DC_8H_DN	0.00362319	0.025207	0.35557	1.57355	0	107
MEDINA_SMARCA4_TARGETS	0.0231362	0.0756382	0.466191	1.57311	8	29
GSE10422_WT_VS_BAFF_TRANSGENIC_LN_BCELL_UP	0.00420168	0.025207	0.343149	1.57288	0	143
GSE8515_IL1_VS_IL6_4H_STIM_MAC_DN	0.00628931	0.0298714	0.374435	1.57288	1	78
SHI_SPARC_TARGETS_UP	0.0484988	0.127582	0.550568	1.57282	20	15
REACTOME_SIGNALING_BY_FGFR1_MUTANTS	0.0387409	0.108802	0.507355	1.57279	15	21
GO_GLAND_MORPHOGENESIS	0.0137363	0.0514705	0.421161	1.57176	4	41
GINESTIER_BREAST_CANCER_ZNF217_AMPLIFIED_UP	0.0031746	0.025207	0.388723	1.57175	0	66
GENTILE_UV_RESPONSE_CLUSTER_D6	0.0231362	0.0756382	0.46578	1.57172	8	29
PID_RAC1_REG_PATHWAY	0.0279898	0.0864111	0.478048	1.57169	10	27
GSE3720_UNSTIM_VS_PMA_STIM_VD1_GAMMADELTA_TCELL_DN	0.0120846	0.0468348	0.405049	1.57169	3	50
GSE35825_IFNA_VS_IFNG_STIM_MACROPHAGE_UP	0.00371747	0.025207	0.352609	1.57149	0	112
GSE17301_IFNA2_VS_IFNA5_STIM_ACD3_ACD28_ACT_CD8_TCELL_UP	0.00452489	0.025207	0.332484	1.5711	0	159
GSE21670_STAT3_KO_VS_WT_CD4_TCELL_IL6_TREATED_DN	0.003663	0.025207	0.352785	1.57107	0	110
GSE1448_CTRL_VS_ANTI_VALPHA2_DP_THYMOCYTE_UP	0.00416667	0.025207	0.345429	1.5707	0	134
GSE3994_WT_VS_PAC1_KO_ACTIVATED_MAST_CELL_DN	0.0042735	0.025207	0.341398	1.57056	0	146
GTCTTCC,MIR-7	0.00380228	0.025207	0.353846	1.57051	0	114
GO_TRANSMEMBRANE_RECEPTOR_PROTEIN_KINASE_ACTIVITY	0.0178117	0.0625074	0.453772	1.57023	6	31
CHEMNITZ_RESPONSE_TO_PROSTAGLANDIN_E2_UP	0.00389105	0.025207	0.35163	1.57008	0	122
GNF2_RRM1	0.00333333	0.025207	0.366797	1.56984	0	87
REACTOME_DOUBLE_STRAND_BREAK_REPAIR	0.034398	0.0998464	0.498424	1.56906	13	22
GO_NEGATIVE_REGULATION_OF_SEQUENCE_SPECIFIC_DNA_BINDING_TRANSCRIPTION_FACTOR_ACTIVITY	0.00333333	0.025207	0.366571	1.56887	0	87
MAGRANGEAS_MULTIPLE_MYELOMA_IGLL_VS_IGLK_UP	0.0275	0.085493	0.466359	1.56866	10	28
GO_SEX_DIFFERENTIATION	0.00392157	0.025207	0.352981	1.56853	0	121
GSE19888_ADENOSINE_A3R_ACT_VS_TCELL_MEMBRANES_ACT_AND_A3R_INH_PRETREAT_IN_MAST_CELL_DN	0.00389105	0.025207	0.354921	1.56819	0	117
GSE23321_EFFECTOR_MEMORY_VS_NAIVE_CD8_TCELL_DN	0.00444444	0.025207	0.330297	1.56795	0	164
GO_REGULATION_OF_JNK_CASCADE	0.00357143	0.025207	0.354597	1.56736	0	102
GO_PIGMENT_CELL_DIFFERENTIATION	0.0491803	0.128892	0.539755	1.56726	20	16
GSE13411_IGM_VS_SWITCHED_MEMORY_BCELL_DN	0.00452489	0.025207	0.330764	1.56656	0	163
GO_NEGATIVE_REGULATION_OF_CELL_CYCLE_PROCESS	0.00465116	0.025207	0.330995	1.56653	0	171
GSE14308_TH2_VS_NAIVE_CD4_TCELL_DN	0.00406504	0.025207	0.341267	1.56625	0	137
GSE27241_WT_CTRL_VS_DIGOXIN_TREATED_RORGT_KO_CD4_TCELL_IN_TH17_POLARIZING_CONDITIONS_UP	0.00392157	0.025207	0.352443	1.56614	0	121
GSE3982_NEUTROPHIL_VS_BASOPHIL_UP	0.00403226	0.025207	0.354843	1.56609	0	119
REACTOME_MITOTIC_G2_G2_M_PHASES	0.00621118	0.0296907	0.372683	1.56588	1	77
GO_GROWTH	0.00483092	0.025207	0.322656	1.56572	0	215
GSE15930_NAIVE_VS_48H_IN_VITRO_STIM_CD8_TCELL_UP	0.00389105	0.025207	0.350622	1.56558	0	122
CATTGTYY_V$SOX9_B1	0.00487805	0.025207	0.319818	1.56545	0	229
GSE40273_GATA1_KO_VS_WT_TREG_DN	0.00456621	0.025207	0.332273	1.56543	0	161
ACCATTT,MIR-522	0.00393701	0.025207	0.349126	1.56532	0	126
GSE21033_1H_VS_12H_POLYIC_STIM_DC_UP	0.003861	0.025207	0.344384	1.56519	0	129
MODULE_486	0.00323625	0.025207	0.388489	1.5651	0	67
GO_RECEPTOR_SIGNALING_PROTEIN_SERINE_THREONINE_KINASE_ACTIVITY	0.0031746	0.025207	0.387035	1.56492	0	66
MODULE_198	0.00531915	0.0264608	0.310571	1.56374	0	272
GSE39820_TGFBETA3_IL6_VS_TGFBETA3_IL6_IL23A_TREATED_CD4_TCELL_UP	0.0045045	0.025207	0.33796	1.56337	0	150
GO_REGULATION_OF_MICROTUBULE_POLYMERIZATION_OR_DEPOLYMERIZATION	0.004329	0.025207	0.338149	1.5632	0	147
GO_PROTEIN_SUMOYLATION	0.00353357	0.025207	0.351216	1.56313	0	108
GARGALOVIC_RESPONSE_TO_OXIDIZED_PHOSPHOLIPIDS_YELLOW_UP	0.0358852	0.102798	0.511739	1.56308	14	20
TCCCCAC,MIR-491	0.0161725	0.0579914	0.419295	1.56282	5	40
GSE12845_IGD_NEG_BLOOD_VS_DARKZONE_GC_TONSIL_BCELL_DN	0.00465116	0.025207	0.329424	1.56266	0	177
AMIT_EGF_RESPONSE_60_HELA	0.0212202	0.0708685	0.440329	1.56264	7	34
GO_POSITIVE_REGULATION_OF_INFLAMMATORY_RESPONSE	0.0212202	0.0708685	0.440271	1.56244	7	34
KANG_DOXORUBICIN_RESISTANCE_DN	0.0508083	0.131555	0.546768	1.56197	21	15
GO_HORMONE_RECEPTOR_BINDING	0.00362319	0.025207	0.351576	1.56161	0	109
V$NCX_01	0.00662252	0.030828	0.361572	1.56154	1	91
GSE20366_CD103_KLRG1_DP_VS_DN_TREG_DN	0.00421941	0.025207	0.340406	1.56063	0	142
MARKEY_RB1_ACUTE_LOF_UP	0.00473934	0.025207	0.3239	1.56032	0	198
GSE40274_FOXP3_VS_FOXP3_AND_HELIOS_TRANSDUCED_ACTIVATED_CD4_TCELL_UP	0.014881	0.0545185	0.397575	1.56028	4	52
TGCTGCT,MIR-15A,MIR-16,MIR-15B,MIR-195,MIR-424,MIR-497	0.00675676	0.0313325	0.297799	1.56009	0	398
GNF2_RRM2	0.0161725	0.0579914	0.418516	1.55991	5	40
GO_CELL_ACTIVATION_INVOLVED_IN_IMMUNE_RESPONSE	0.00628931	0.0298714	0.371274	1.5596	1	78
GSE5455_HEALTHY_VS_TUMOR_BEARING_MOUSE_SPLEEN_MONOCYTE_24H_INCUBATION_UP	0.00389105	0.025207	0.344719	1.55928	0	128
MORF_MSH3	0.00444444	0.025207	0.337883	1.55927	0	149
GO_FOLIC_ACID_METABOLIC_PROCESS	0.0508083	0.131555	0.5458	1.5592	21	15
GO_CELL_PROLIFERATION	0.00657895	0.030711	0.298545	1.55884	0	392
GO_AMINO_ACID_TRANSMEMBRANE_TRANSPORTER_ACTIVITY	0.0162162	0.0581012	0.438623	1.55884	5	35
KEGG_CHEMOKINE_SIGNALING_PATHWAY	0.00358423	0.025207	0.35264	1.55871	0	104
GO_HEAD_MORPHOGENESIS	0.0495283	0.129492	0.522242	1.55827	20	18
MODULE_525	0.0152439	0.0556027	0.395584	1.5582	4	53
GSE9946_IMMATURE_VS_PROSTAGLANDINE2_TREATED_MATURE_DC_UP	0.00621118	0.0296907	0.370851	1.55819	1	77
HALLMARK_INFLAMMATORY_RESPONSE	0.00344828	0.025207	0.361404	1.55811	0	94
GSE24634_IL4_VS_CTRL_TREATED_NAIVE_CD4_TCELL_DAY7_DN	0.00420168	0.025207	0.340834	1.55807	0	140
AGGGCAG,MIR-18A	0.00333333	0.025207	0.364046	1.55807	0	87
GO_MORPHOGENESIS_OF_AN_EPITHELIUM	0.00478469	0.025207	0.322797	1.55757	0	197
V$CREBP1_01	0.00389105	0.025207	0.352425	1.55716	0	117
TCTGATA,MIR-361	0.0246154	0.0789065	0.384211	1.55716	7	61
MCBRYAN_PUBERTAL_BREAST_5_6WK_DN	0.00357143	0.025207	0.354898	1.5571	0	100
GSE16385_MONOCYTE_VS_12H_IL4_TREATED_MACROPHAGE_DN	0.00454545	0.025207	0.327471	1.55679	0	166
GSE16755_CTRL_VS_IFNA_TREATED_MAC_DN	0.00392157	0.025207	0.34251	1.55648	0	130
GSE17721_LPS_VS_CPG_4H_BMDC_UP	0.00403226	0.025207	0.338964	1.55639	0	138
GO_DEVELOPMENTAL_PIGMENTATION	0.0348259	0.100803	0.489832	1.55638	13	23
CCCNNGGGAR_V$OLF1_01	0.00465116	0.025207	0.328093	1.55634	0	177
GO_HINDBRAIN_DEVELOPMENT	0.0096463	0.0393286	0.378759	1.55629	2	71
CHEN_ETV5_TARGETS_TESTIS	0.0468384	0.124417	0.528024	1.55627	19	17
LTE2_UP.V1_DN	0.00416667	0.025207	0.342251	1.55625	0	134
GSE15624_3H_VS_6H_HALOFUGINONE_TREATED_CD4_TCELL_UP	0.00393701	0.025207	0.349363	1.55616	0	123
V$SRY_02	0.00414938	0.025207	0.341039	1.55613	0	135
MORF_PML	0.00346021	0.025207	0.358225	1.55607	0	95
GO_SODIUM_ION_TRANSMEMBRANE_TRANSPORTER_ACTIVITY	0.0162162	0.0581012	0.437814	1.55597	5	35
GSE22935_UNSTIM_VS_24H_MBOVIS_BCG_STIM_MACROPHAGE_DN	0.00392157	0.025207	0.342359	1.55579	0	130
BIOCARTA_IL2RB_PATHWAY	0.0212202	0.0708685	0.438229	1.55519	7	34
KEGG_PATHWAYS_IN_CANCER	0.00471698	0.025207	0.321636	1.55486	0	203
POS_HISTAMINE_RESPONSE_NETWORK	0.0400943	0.111245	0.514632	1.55455	16	19
GO_ADAPTIVE_IMMUNE_RESPONSE_BASED_ON_SOMATIC_RECOMBINATION_OF_IMMUNE_RECEPTORS_BUILT_FROM_IMMUNOGLOBULIN_SUPERFAMILY_DOMAINS	0.00630915	0.029955	0.374735	1.55444	1	73
GO_INTERMEDIATE_FILAMENT_CYTOSKELETON	0.0152905	0.0556784	0.384887	1.55433	4	63
WTTGKCTG_UNKNOWN	0.00564972	0.0276614	0.308955	1.55386	0	291
GO_TRANSCRIPTION_COACTIVATOR_ACTIVITY	0.00487805	0.025207	0.317426	1.55374	0	229
GSE26030_TH1_VS_TH17_RESTIMULATED_DAY5_POST_POLARIZATION_DN	0.00458716	0.025207	0.330513	1.55367	0	157
PID_CERAMIDE_PATHWAY	0.0137363	0.0514705	0.416235	1.55338	4	41
GSE17721_CTRL_VS_LPS_2H_BMDC_DN	0.004	0.025207	0.349608	1.55304	0	124
MORF_REV3L	0.0182371	0.0635886	0.39004	1.55302	5	56
GO_PROTEIN_K63_LINKED_DEUBIQUITINATION	0.0411622	0.11312	0.500959	1.55297	16	21
DEURIG_T_CELL_PROLYMPHOCYTIC_LEUKEMIA_DN	0.00485437	0.025207	0.313559	1.55288	0	242
GO_POSITIVE_REGULATION_OF_INTERLEUKIN_2_PRODUCTION	0.0495283	0.129492	0.520431	1.55286	20	18
TGTGTGA,MIR-377	0.00406504	0.025207	0.341714	1.55263	0	131
GSE28737_WT_VS_BCL6_KO_MARGINAL_ZONE_BCELL_DN	0.00444444	0.025207	0.336444	1.55263	0	149
V$CDP_01	0.0202532	0.0686189	0.443986	1.55255	7	32
MODULE_332	0.0141643	0.0524406	0.416566	1.55234	4	42
GSE35543_IN_VIVO_NTREG_VS_CONVERTED_EX_ITREG_DN	0.0152905	0.0556784	0.38435	1.55217	4	63
CAGGTCC,MIR-492	0.0216802	0.0719121	0.422027	1.55179	7	38
NAGASHIMA_NRG1_SIGNALING_DN	0.0137363	0.0514705	0.415739	1.55153	4	41
MORF_STK17A	0.00314465	0.025207	0.370406	1.55135	0	76
GSE13173_UNTREATED_VS_IL12_TREATED_ACT_CD8_TCELL_DN	0.00377358	0.025207	0.348389	1.55122	0	113
GO_LIPID_PHOSPHORYLATION	0.0152905	0.0556784	0.390645	1.55107	4	55
GSE36888_UNTREATED_VS_IL2_TREATED_TCELL_2H_UP	0.00414938	0.025207	0.339871	1.5508	0	135
THEILGAARD_NEUTROPHIL_AT_SKIN_WOUND_UP	0.0186335	0.0643248	0.386768	1.55043	5	59
GCACCTT,MIR-18A,MIR-18B	0.00331126	0.025207	0.36178	1.55031	0	86
GO_TUBE_FORMATION	0.00641026	0.0300392	0.364625	1.55017	1	82
GO_REGULATION_OF_CYTOSKELETON_ORGANIZATION	0.00609756	0.0294219	0.298639	1.55012	0	355
MORF_ORC1L	0.0122699	0.047333	0.387842	1.54964	3	57
NIKOLSKY_MUTATED_AND_AMPLIFIED_IN_BREAST_CANCER	0.0122699	0.047333	0.387817	1.54954	3	57
GSE24142_EARLY_THYMIC_PROGENITOR_VS_DN2_THYMOCYTE_FETAL_UP	0.00367647	0.025207	0.348095	1.54944	0	111
GO_RESPONSE_TO_LIGHT_STIMULUS	0.00460829	0.025207	0.326645	1.54914	0	175
GO_GTPASE_BINDING	0.00487805	0.025207	0.316441	1.54892	0	229
V$S8_01	0.00362319	0.025207	0.35085	1.54854	0	103
GSE10463_CD40L_AND_VA347_VS_CD40L_IN_DC_UP	0.004	0.025207	0.348585	1.5485	0	124
GSE15624_CTRL_VS_3H_HALOFUGINONE_TREATED_CD4_TCELL_UP	0.00421941	0.025207	0.342636	1.54849	0	133
JNK_DN.V1_UP	0.003125	0.025207	0.372511	1.5484	0	75
GO_LIPOPOLYSACCHARIDE_MEDIATED_SIGNALING_PATHWAY	0.0424528	0.115459	0.512586	1.54837	17	19
GSE41176_UNSTIM_VS_ANTI_IGM_STIM_BCELL_3H_UP	0.00380228	0.025207	0.348786	1.54806	0	114
GO_NEGATIVE_REGULATION_OF_LIPID_BIOSYNTHETIC_PROCESS	0.0285714	0.0876269	0.474586	1.54804	10	26
GO_ANTERIOR_POSTERIOR_PATTERN_SPECIFICATION	0.00331126	0.025207	0.361222	1.54792	0	86
REACTOME_SIGNALING_BY_SCF_KIT	0.00636943	0.0300167	0.38305	1.54734	1	65
GCM_DDX11	0.0185676	0.0642637	0.42864	1.54692	6	36
MYLLYKANGAS_AMPLIFICATION_HOT_SPOT_23	0.0538642	0.137439	0.532731	1.54687	22	16
GSE2770_IL4_ACT_VS_ACT_CD4_TCELL_48H_DN	0.00416667	0.025207	0.340149	1.54669	0	134
V$HMEF2_Q6	0.0122699	0.047333	0.387072	1.54656	3	57
GSE27786_NKTCELL_VS_ERYTHROBLAST_DN	0.0033557	0.025207	0.363394	1.54583	0	84
REACTOME_CD28_CO_STIMULATION	0.0296296	0.0899208	0.477475	1.54554	11	24
NAKAMURA_CANCER_MICROENVIRONMENT_DN	0.0137363	0.0514705	0.414074	1.54532	4	41
HALLMARK_APOPTOSIS	0.00380228	0.025207	0.348132	1.54515	0	114
E2F1_UP.V1_DN	0.00377358	0.025207	0.347574	1.54461	0	116
GSE3920_UNTREATED_VS_IFNG_TREATED_FIBROBLAST_DN	0.00389105	0.025207	0.350028	1.54446	0	115
GO_RESPONSE_TO_STARVATION	0.00357143	0.025207	0.349411	1.54444	0	102
GSE7568_CTRL_VS_24H_TGFB_TREATED_MACROPHAGES_WITH_IL4_AND_DEXAMETHASONE_UP	0.0041841	0.025207	0.334448	1.54398	0	145
BENPORATH_ES_1	0.00543478	0.0269556	0.310278	1.54364	0	267
GSE17721_POLYIC_VS_PAM3CSK4_2H_BMDC_DN	0.00364964	0.025207	0.348703	1.54284	0	105
GO_MALE_MEIOSIS	0.0424528	0.115459	0.510718	1.54273	17	19
GO_POSITIVE_REGULATION_OF_CELL_DEVELOPMENT	0.00505051	0.0257292	0.310373	1.54261	0	252
CAATGCA,MIR-33	0.0277778	0.086004	0.381752	1.54238	8	60
HALLMARK_ESTROGEN_RESPONSE_EARLY	0.00371747	0.025207	0.34607	1.54234	0	112
MODULE_389	0.00362319	0.025207	0.348509	1.5423	0	107
GSE557_WT_VS_CIITA_KO_DC_DN	0.00409836	0.025207	0.336989	1.54222	0	139
GO_RNA_POLYMERASE_CORE_ENZYME_BINDING	0.0495283	0.129492	0.516825	1.5421	20	18
GO_CELLULAR_RESPONSE_TO_NUTRIENT	0.0406699	0.112212	0.504863	1.54208	16	20
ACTACCT,MIR-196A,MIR-196B	0.00344828	0.025207	0.360796	1.54169	0	89
PID_HDAC_CLASSI_PATHWAY	0.0152905	0.0556784	0.388243	1.54154	4	55
GSE36009_UNSTIM_VS_LPS_STIM_DC_DN	0.00452489	0.025207	0.325409	1.5412	0	163
GSE7852_LN_VS_THYMUS_TREG_UP	0.00414938	0.025207	0.33775	1.54113	0	135
REACTOME_ACTIVATION_OF_GENES_BY_ATF4	0.0411622	0.11312	0.497116	1.54105	16	21
GSE18804_SPLEEN_MACROPHAGE_VS_BRAIN_TUMORAL_MACROPHAGE_UP	0.00364964	0.025207	0.348294	1.54103	0	105
REACTOME_NUCLEAR_RECEPTOR_TRANSCRIPTION_PATHWAY	0.0296296	0.0899208	0.475826	1.5402	11	24
GSE18791_UNSTIM_VS_NEWCATSLE_VIRUS_DC_18H_DN	0.00344828	0.025207	0.360421	1.54009	0	89
GO_CELL_MORPHOGENESIS_INVOLVED_IN_NEURON_DIFFERENTIATION	0.00456621	0.025207	0.324942	1.54005	0	165
GO_SITE_OF_POLARIZED_GROWTH	0.00340136	0.025207	0.357432	1.53993	0	93
GO_HISTONE_METHYLTRANSFERASE_ACTIVITY	0.0188679	0.0649993	0.415829	1.53991	6	39
GO_POSITIVE_REGULATION_OF_STRESS_ACTIVATED_PROTEIN_KINASE_SIGNALING_CASCADE	0.00641026	0.0300392	0.362186	1.5398	1	82
GSE21670_TGFB_VS_TGFB_AND_IL6_TREATED_CD4_TCELL_UP	0.00420168	0.025207	0.341472	1.53969	0	132
GO_POSITIVE_REGULATION_OF_NUCLEOCYTOPLASMIC_TRANSPORT	0.00621118	0.0296907	0.366448	1.53969	1	77
GSE15930_NAIVE_VS_72H_IN_VITRO_STIM_CD8_TCELL_UP	0.00416667	0.025207	0.338584	1.53957	0	134
GO_MAP_KINASE_KINASE_KINASE_ACTIVITY	0.0554273	0.140486	0.538814	1.53924	23	15
TGCACTG,MIR-148A,MIR-152,MIR-148B	0.00478469	0.025207	0.320581	1.53924	0	210
GO_CELLULAR_RESPONSE_TO_LIPID	0.00483092	0.025207	0.31126	1.53846	0	241
GO_REGULATION_OF_CHROMOSOME_ORGANIZATION	0.00487805	0.025207	0.314507	1.53841	0	224
GNF2_BUB1	0.0311688	0.0932756	0.471622	1.53837	11	26
REACTOME_PI3K_AKT_ACTIVATION	0.0265252	0.0833846	0.433487	1.53836	9	34
ROESSLER_LIVER_CANCER_METASTASIS_UP	0.00949367	0.0388608	0.373706	1.53828	2	70
WIERENGA_STAT5A_TARGETS_GROUP1	0.00309598	0.025207	0.370395	1.53827	0	74
GO_CELL_FATE_COMMITMENT	0.00961538	0.0392385	0.367086	1.53792	2	79
GO_CELLULAR_SENESCENCE	0.0325	0.095988	0.468912	1.53735	12	25
GO_POSITIVE_REGULATION_OF_OSSIFICATION	0.0265957	0.0835669	0.421813	1.53727	9	37
WIERENGA_STAT5A_TARGETS_UP	0.004	0.025207	0.345957	1.53683	0	124
GO_GRANULOCYTE_MIGRATION	0.0411622	0.11312	0.495563	1.53624	16	21
V$ATF4_Q2	0.00444444	0.025207	0.323576	1.53604	0	164
GO_POSITIVE_REGULATION_OF_DENDRITE_DEVELOPMENT	0.0188679	0.0649993	0.412062	1.53586	6	40
BIOCARTA_FAS_PATHWAY	0.0282776	0.0868258	0.455144	1.53583	10	29
GSE3982_EOSINOPHIL_VS_MAC_UP	0.00392157	0.025207	0.337967	1.53583	0	130
GO_REGULATION_OF_NEURON_DEATH	0.0042735	0.025207	0.33384	1.53579	0	146
BIOCARTA_IL2_PATHWAY	0.0448113	0.120351	0.50825	1.53528	18	19
GSE9601_NFKB_INHIBITOR_VS_PI3K_INHIBITOR_TREATED_HCMV_INF_MONOCYTE_DN	0.00362319	0.025207	0.346873	1.53506	0	107
ENGELMANN_CANCER_PROGENITORS_UP	0.0348259	0.100803	0.483054	1.53484	13	23
GSE21546_ELK1_KO_VS_SAP1A_KO_AND_ELK1_KO_ANTI_CD3_STIM_DP_THYMOCYTES_DN	0.00409836	0.025207	0.335347	1.5347	0	139
REACTOME_L1CAM_INTERACTIONS	0.0119048	0.0462859	0.397126	1.53383	3	49
NAKAJIMA_EOSINOPHIL	0.0554273	0.140486	0.536807	1.53351	23	15
KIM_MYC_AMPLIFICATION_TARGETS_DN	0.0308642	0.0927387	0.379427	1.53298	9	60
TTTGCAG,MIR-518A-2	0.00469484	0.025207	0.327852	1.53283	0	156
V$CEBP_Q2_01	0.00421941	0.025207	0.333572	1.53281	0	144
AMIT_EGF_RESPONSE_60_MCF10A	0.0320988	0.0951738	0.473535	1.53278	12	24
GSE5503_LIVER_DC_VS_MLN_DC_ACTIVATED_ALLOGENIC_TCELL_UP	0.00380228	0.025207	0.345189	1.53209	0	114
GSE16385_ROSIGLITAZONE_IFNG_TNF_VS_IL4_STIM_MACROPHAGE_UP	0.00389105	0.025207	0.343078	1.5319	0	122
GO_LEUKOCYTE_ACTIVATION	0.00505051	0.0257292	0.307908	1.53157	0	253
GO_PROTEIN_MODIFICATION_BY_SMALL_PROTEIN_REMOVAL	0.00357143	0.025207	0.347784	1.53121	0	101
TGTATGA,MIR-485-3P	0.00358423	0.025207	0.346301	1.53069	0	104
GO_REGULATION_OF_SMALL_GTPASE_MEDIATED_SIGNAL_TRANSDUCTION	0.00460829	0.025207	0.322745	1.53064	0	175
GO_REGULATION_OF_CIRCADIAN_RHYTHM	0.0186335	0.0643248	0.38181	1.53055	5	59
RUTELLA_RESPONSE_TO_HGF_VS_CSF2RB_AND_IL4_DN	0.00438596	0.025207	0.317118	1.53049	0	183
GSE14350_TREG_VS_TEFF_IN_IL2RB_KO_UP	0.00452489	0.025207	0.323876	1.53043	0	159
EBAUER_TARGETS_OF_PAX3_FOXO1_FUSION_UP	0.00701754	0.0322103	0.348199	1.53031	1	99
GARGALOVIC_RESPONSE_TO_OXIDIZED_PHOSPHOLIPIDS_TURQUOISE_UP	0.0184049	0.0639162	0.382928	1.53001	5	57
GO_POSITIVE_REGULATION_OF_CELL_DIFFERENTIATION	0.0070922	0.0324368	0.293277	1.5293	0	410
GSE30971_CTRL_VS_LPS_STIM_MACROPHAGE_WBP7_KO_2H_UP	0.00371747	0.025207	0.342961	1.52849	0	112
MASSARWEH_TAMOXIFEN_RESISTANCE_UP	0.00628931	0.0298714	0.298073	1.52843	0	341
GSE35825_UNTREATED_VS_IFNA_STIM_MACROPHAGE_DN	0.00362319	0.025207	0.344104	1.52842	0	109
GSE37416_12H_VS_48H_F_TULARENSIS_LVS_NEUTROPHIL_UP	0.00444444	0.025207	0.321953	1.52834	0	164
IWANAGA_CARCINOGENESIS_BY_KRAS_PTEN_DN	0.00478469	0.025207	0.318705	1.52815	0	193
GSE21360_PRIMARY_VS_TERTIARY_MEMORY_CD8_TCELL_DN	0.0041841	0.025207	0.331001	1.52807	0	145
GENTILE_UV_RESPONSE_CLUSTER_D8	0.0229008	0.074997	0.441573	1.52802	8	31
GO_DIGESTIVE_TRACT_MORPHOGENESIS	0.034398	0.0998464	0.485376	1.52798	13	22
GSE24671_CTRL_VS_SENDAI_VIRUS_INFECTED_MOUSE_SPLENOCYTES_DN	0.00456621	0.025207	0.322369	1.52785	0	165
GSE40666_WT_VS_STAT4_KO_CD8_TCELL_WITH_IFNA_STIM_90MIN_UP	0.00421941	0.025207	0.334091	1.52785	0	141
GSE6259_FLT3L_INDUCED_33D1_POS_DC_VS_BCELL_DN	0.00458716	0.025207	0.321562	1.52762	0	169
BREDEMEYER_RAG_SIGNALING_VIA_ATM_NOT_VIA_NFKB_UP	0.0212202	0.0708685	0.423273	1.52755	7	36
REACTOME_REGULATION_OF_SIGNALING_BY_CBL	0.0515222	0.133016	0.518234	1.52742	21	17
LINDSTEDT_DENDRITIC_CELL_MATURATION_C	0.014881	0.0545185	0.395462	1.5274	4	49
GO_HEPATICOBILIARY_SYSTEM_DEVELOPMENT	0.0033557	0.025207	0.359012	1.52719	0	84
GO_RESPONSE_TO_HEAT	0.0140056	0.0521186	0.403627	1.52707	4	43
DAVICIONI_TARGETS_OF_PAX_FOXO1_FUSIONS_DN	0.0265252	0.0833846	0.430281	1.52698	9	34
GSE9988_LOW_LPS_VS_CTRL_TREATED_MONOCYTE_DN	0.00465116	0.025207	0.321893	1.52693	0	177
GNF2_CCNB2	0.0243161	0.0783617	0.383457	1.52681	7	56
GSE42021_TREG_PLN_VS_TREG_PRECURSORS_THYMUS_UP	0.00377358	0.025207	0.343482	1.52643	0	116
GSE42021_CD24HI_VS_CD24LOW_TREG_THYMUS_DN	0.00389105	0.025207	0.337451	1.5264	0	128
GO_NECROPTOTIC_PROCESS	0.0562061	0.141894	0.525279	1.52523	23	16
HELLER_HDAC_TARGETS_DN	0.00502513	0.0256883	0.313555	1.52522	0	222
REACTOME_PLATELET_AGGREGATION_PLUG_FORMATION	0.0518868	0.133698	0.511131	1.52512	21	18
GSE20366_EX_VIVO_VS_HOMEOSTATIC_CONVERSION_TREG_UP	0.00456621	0.025207	0.323707	1.52508	0	161
WEIGEL_OXIDATIVE_STRESS_BY_HNE_AND_TBH	0.0166205	0.059263	0.397356	1.52468	5	46
AGGAGTG,MIR-483	0.0142045	0.052575	0.394586	1.52464	4	48
GSE22601_IMMATURE_CD4_SINGLE_POSITIVE_VS_CD4_SINGLE_POSITIVE_THYMOCYTE_DN	0.00414938	0.025207	0.334119	1.52456	0	135
BIOCARTA_CARM_ER_PATHWAY	0.0207792	0.0699567	0.447591	1.52413	7	30
GSE19198_1H_VS_6H_IL21_TREATED_TCELL_DN	0.0041841	0.025207	0.330106	1.52394	0	145
GO_NEGATIVE_REGULATION_OF_TOLL_LIKE_RECEPTOR_SIGNALING_PATHWAY	0.0518868	0.133698	0.510684	1.52378	21	18
GO_PROTEIN_SERINE_THREONINE_TYROSINE_KINASE_ACTIVITY	0.0253165	0.0804574	0.435751	1.52375	9	32
GSE45365_WT_VS_IFNAR_KO_CD8A_DC_DN	0.00420168	0.025207	0.333306	1.52366	0	140
GSE37301_HEMATOPOIETIC_STEM_CELL_VS_CD4_TCELL_UP	0.00380228	0.025207	0.343276	1.5236	0	114
GSE11961_GERMINAL_CENTER_BCELL_DAY7_VS_PLASMA_CELL_DAY7_UP	0.00420168	0.025207	0.337884	1.52352	0	132
REACTOME_EFFECTS_OF_PIP2_HYDROLYSIS	0.0600462	0.148688	0.533291	1.52347	25	15
GSE20366_EX_VIVO_VS_DEC205_CONVERSION_NAIVE_CD4_TCELL_DN	0.00714286	0.0326125	0.345946	1.52311	1	101
GO_HISTONE_MONOUBIQUITINATION	0.0348259	0.100803	0.479303	1.52292	13	23
GSE41867_NAIVE_VS_DAY6_LCMV_ARMSTRONG_EFFECTOR_CD8_TCELL_DN	0.00421941	0.025207	0.336755	1.52191	0	133
GSE12845_NAIVE_VS_DARKZONE_GC_TONSIL_BCELL_UP	0.003861	0.025207	0.33486	1.5219	0	129
V$FREAC3_01	0.00406504	0.025207	0.334921	1.52176	0	131
CHANG_CYCLING_GENES	0.00421941	0.025207	0.336674	1.52155	0	133
KEGG_GLYCINE_SERINE_AND_THREONINE_METABOLISM	0.0562061	0.141894	0.523923	1.52129	23	16
GNF2_BUB1B	0.014881	0.0545185	0.393768	1.52086	4	49
GSE4142_PLASMA_CELL_VS_GC_BCELL_UP	0.00403226	0.025207	0.344544	1.52064	0	119
GSE2405_0H_VS_9H_A_PHAGOCYTOPHILUM_STIM_NEUTROPHIL_UP	0.00420168	0.025207	0.33258	1.52034	0	140
GSE6092_CTRL_VS_BORRELIA_BIRGDOFERI_INF_ENDOTHELIAL_CELL_DN	0.00344828	0.025207	0.352619	1.52024	0	94
GSE5679_CTRL_VS_PPARG_LIGAND_ROSIGLITAZONE_TREATED_DC_DN	0.0041841	0.025207	0.329278	1.52012	0	145
GO_IMMUNE_SYSTEM_DEVELOPMENT	0.00613497	0.0295169	0.293819	1.51987	0	350
TGCTTTG,MIR-330	0.00485437	0.025207	0.313834	1.51968	0	217
LAU_APOPTOSIS_CDKN2A_UP	0.0185185	0.0641103	0.391643	1.51964	5	51
V$HOXA4_Q2	0.00401606	0.025207	0.339068	1.51935	0	127
GO_RESPONSE_TO_NERVE_GROWTH_FACTOR	0.0282776	0.0868258	0.450231	1.51925	10	29
MEL18_DN.V1_UP	0.0216718	0.0719121	0.380538	1.51918	6	58
TURASHVILI_BREAST_LOBULAR_CARCINOMA_VS_DUCTAL_NORMAL_DN	0.0310881	0.0931385	0.431104	1.51899	11	33
GSE5142_CTRL_VS_HTERT_TRANSDUCED_CD8_TCELL_EARLY_PASSAGE_CLONE_UP	0.00436681	0.025207	0.3284	1.51894	0	148
GSE22611_UNSTIM_VS_2H_MDP_STIM_MUTANT_NOD2_TRANSDUCED_HEK293T_CELL_DN	0.00465116	0.025207	0.319113	1.51857	0	178
CTTTGTA,MIR-524	0.00546448	0.0270827	0.300484	1.51852	0	295
GSE9946_IMMATURE_VS_PROSTAGLANDINE2_TREATED_MATURE_DC_DN	0.0127389	0.0485519	0.371175	1.51842	3	69
GTGCCAA,MIR-96	0.00478469	0.025207	0.315966	1.51819	0	200
V$CREB_Q2_01	0.0044843	0.025207	0.323724	1.51815	0	154
GO_ADHERENS_JUNCTION_ASSEMBLY	0.0435835	0.117742	0.48971	1.51809	17	21
GSE9988_ANTI_TREM1_VS_CTRL_TREATED_MONOCYTES_UP	0.00406504	0.025207	0.333973	1.51746	0	131
PID_TELOMERASE_PATHWAY	0.0308642	0.0927387	0.375578	1.51743	9	60
GSE2405_S_AUREUS_VS_UNTREATED_NEUTROPHIL_DN	0.00460829	0.025207	0.322254	1.51738	0	158
GSE32423_MEMORY_VS_NAIVE_CD8_TCELL_IL7_IL4_DN	0.00452489	0.025207	0.321079	1.51721	0	159
CHEBOTAEV_GR_TARGETS_DN	0.0138504	0.0517621	0.399931	1.51711	4	44
PID_RB_1PATHWAY	0.0185185	0.0641103	0.39096	1.51699	5	51
GO_NEURON_DIFFERENTIATION	0.0070922	0.0324368	0.2899	1.5169	0	414
GSE37534_UNTREATED_VS_ROSIGLITAZONE_TREATED_CD4_TCELL_PPARG1_AND_FOXP3_TRASDUCED_UP	0.00401606	0.025207	0.338441	1.51654	0	127
LEE_NEURAL_CREST_STEM_CELL_DN	0.0273556	0.0852713	0.380788	1.51618	8	56
GO_RESPONSE_TO_ARSENIC_CONTAINING_SUBSTANCE	0.0435835	0.117742	0.489081	1.51614	17	21
GO_T_CELL_MEDIATED_IMMUNITY	0.0495283	0.129492	0.501826	1.51587	20	19
GO_REGULATION_OF_VASCULATURE_DEVELOPMENT	0.00668896	0.0310722	0.351858	1.5158	1	92
GO_REGULATION_OF_ERK1_AND_ERK2_CASCADE	0.00668896	0.0310722	0.352501	1.51557	1	90
GO_EPITHELIUM_DEVELOPMENT	0.00746269	0.0337149	0.28688	1.51537	0	439
GSE32901_TH1_VS_TH17_ENRICHED_CD4_TCELL_UP	0.00409836	0.025207	0.331091	1.51522	0	139
GO_REGULATION_OF_NEURON_DIFFERENTIATION	0.00529101	0.026459	0.30031	1.51509	0	275
GSE42021_TREG_PLN_VS_CD24INT_TREG_THYMUS_UP	0.0044843	0.025207	0.323052	1.515	0	154
PID_AVB3_INTEGRIN_PATHWAY	0.0238727	0.0772314	0.419787	1.51497	8	36
ZHAN_MULTIPLE_MYELOMA_PR_UP	0.021978	0.0726353	0.405925	1.51491	7	41
GSE32986_GMCSF_AND_CURDLAN_LOWDOSE_VS_GMCSF_AND_CURDLAN_HIGHDOSE_STIM_DC_UP	0.00452489	0.025207	0.322599	1.51474	0	155
GO_INTRACELLULAR_RECEPTOR_SIGNALING_PATHWAY	0.00377358	0.025207	0.340844	1.5147	0	116
V$YY1_01	0.00456621	0.025207	0.319587	1.51467	0	165
GSE26928_EFF_MEMORY_VS_CXCR5_POS_CD4_TCELL_DN	0.00389105	0.025207	0.342784	1.51457	0	117
GSE6269_FLU_VS_STREP_PNEUMO_INF_PBMC_UP	0.00420168	0.025207	0.330325	1.5141	0	143
CACTGCC,MIR-34A,MIR-34C,MIR-449	0.0044843	0.025207	0.314992	1.51371	0	184
GSE7852_TREG_VS_TCONV_FAT_DN	0.00460829	0.025207	0.321421	1.51346	0	158
GO_DNA_REPAIR	0.00763359	0.0343357	0.290636	1.51339	0	416
TCTAGAG,MIR-517	0.0310881	0.0931385	0.42949	1.5133	11	33
GO_LYMPHOCYTE_ACTIVATION	0.00497512	0.0255404	0.311119	1.51222	0	221
chr1q25	0.0269542	0.0843156	0.405417	1.51109	9	40
GO_MESODERM_MORPHOGENESIS	0.0282776	0.0868258	0.447779	1.51098	10	29
BIOCARTA_NTHI_PATHWAY	0.0454545	0.121662	0.494657	1.5109	18	20
BIOCARTA_IL7_PATHWAY	0.0608899	0.150219	0.520285	1.51073	25	16
ROME_INSULIN_TARGETS_IN_MUSCLE_DN	0.00380228	0.025207	0.34028	1.5103	0	114
GO_TUBE_MORPHOGENESIS	0.00473934	0.025207	0.319566	1.51009	0	174
ATF2_UP.V1_DN	0.00334448	0.025207	0.351974	1.51008	0	88
GO_REGULATION_OF_TRANSCRIPTION_ELONGATION_FROM_RNA_POLYMERASE_II_PROMOTER	0.0435835	0.117742	0.487059	1.50988	17	21
GSE30962_ACUTE_VS_CHRONIC_LCMV_PRIMARY_INF_CD8_TCELL_DN	0.00452489	0.025207	0.321472	1.50945	0	155
COULOUARN_TEMPORAL_TGFB1_SIGNATURE_UP	0.009375	0.0385169	0.363137	1.50944	2	75
AGGGCCA,MIR-328	0.0248447	0.0794697	0.376517	1.50934	7	59
GO_REGULATION_OF_HISTONE_H3_K4_METHYLATION	0.0454545	0.121662	0.494123	1.50927	18	20
TAANNYSGCG_UNKNOWN	0.00970874	0.0395348	0.374625	1.50924	2	67
GO_RNA_POLYMERASE_BINDING	0.0233766	0.0761625	0.443205	1.50919	8	30
GO_REGULATION_OF_MRNA_METABOLIC_PROCESS	0.00701754	0.0322103	0.343374	1.5091	1	99
ZHANG_BREAST_CANCER_PROGENITORS_UP	0.00609756	0.0294219	0.290732	1.50908	0	355
GSE7548_NAIVE_VS_DAY28_PCC_IMMUNIZATION_CD4_TCELL_UP	0.00444444	0.025207	0.326983	1.50897	0	149
GO_REGULATION_OF_CENTROSOME_CYCLE	0.0265252	0.0833846	0.41792	1.50823	9	36
BOGNI_TREATMENT_RELATED_MYELOID_LEUKEMIA_DN	0.0425	0.115493	0.44827	1.50782	16	28
GSE37532_WT_VS_PPARG_KO_LN_TCONV_UP	0.00409836	0.025207	0.329364	1.50732	0	139
GO_ACTIVATION_OF_GTPASE_ACTIVITY	0.0183486	0.0637539	0.379548	1.50701	5	55
GO_REGIONALIZATION	0.00416667	0.025207	0.331311	1.5065	0	134
GO_HISTONE_DEACETYLASE_COMPLEX	0.0185185	0.0641103	0.388251	1.50648	5	51
GSE41867_NAIVE_VS_DAY15_LCMV_ARMSTRONG_EFFECTOR_CD8_TCELL_DN	0.00452489	0.025207	0.318793	1.50641	0	159
PID_KIT_PATHWAY	0.0168067	0.0597672	0.398045	1.50595	5	43
GO_ENDODERM_DEVELOPMENT	0.038961	0.109101	0.461623	1.50575	14	26
REACTOME_SLC_MEDIATED_TRANSMEMBRANE_TRANSPORT	0.00389105	0.025207	0.34125	1.50572	0	115
GSE32423_MEMORY_VS_NAIVE_CD8_TCELL_DN	0.00460829	0.025207	0.319944	1.50564	0	162
GO_REGULATION_OF_SYNAPSE_ASSEMBLY	0.0566038	0.142466	0.498409	1.50555	23	19
GSE13547_WT_VS_ZFX_KO_BCELL_UP	0.00714286	0.0326125	0.343131	1.50547	1	100
GO_B_CELL_ACTIVATION	0.00662252	0.030828	0.348533	1.50523	1	91
MUELLER_COMMON_TARGETS_OF_AML_FUSIONS_DN	0.0562061	0.141894	0.510493	1.5046	23	17
ZHAN_MULTIPLE_MYELOMA_PR_DN	0.0265252	0.0833846	0.416819	1.50426	9	36
GO_CYTOKINE_ACTIVITY	0.0168539	0.0599031	0.394628	1.50422	5	45
GSE3982_EOSINOPHIL_VS_NEUTROPHIL_DN	0.00414938	0.025207	0.329603	1.50395	0	135
GO_CELLULAR_RESPONSE_TO_VIRUS	0.0562061	0.141894	0.510214	1.50378	23	17
GSE339_CD4POS_VS_CD8POS_DC_UP	0.0042735	0.025207	0.326835	1.50357	0	146
GO_14_3_3_PROTEIN_BINDING	0.0646651	0.156662	0.526284	1.50345	27	15
GSE28737_WT_VS_BCL6_HET_MARGINAL_ZONE_BCELL_DN	0.00392157	0.025207	0.330839	1.50344	0	130
GCM_SMO	0.0196078	0.0668572	0.397366	1.50338	6	43
GSE8685_IL2_STARVED_VS_IL2_ACT_IL2_STARVED_CD4_TCELL_DN	0.0044843	0.025207	0.32055	1.50327	0	154
GSE9037_CTRL_VS_LPS_1H_STIM_IRAK4_KO_BMDM_DN	0.00389105	0.025207	0.336523	1.50263	0	122
GAL_LEUKEMIC_STEM_CELL_DN	0.003861	0.025207	0.330566	1.50239	0	129
GSE22103_UNSTIM_VS_LPS_STIM_NEUTROPHIL_UP	0.00452489	0.025207	0.316136	1.5023	0	167
GSE9960_HEALTHY_VS_GRAM_POS_SEPSIS_PBMC_DN	0.00393701	0.025207	0.335065	1.50227	0	126
GSE27092_WT_VS_HDAC7_PHOSPHO_DEFICIENT_CD8_TCELL_UP	0.00662252	0.030828	0.347806	1.50209	1	91
GSE27786_CD8_TCELL_VS_NEUTROPHIL_DN	0.00414938	0.025207	0.32914	1.50184	0	135
GO_DNA_BIOSYNTHETIC_PROCESS	0.00364964	0.025207	0.33907	1.50183	0	106
GSE46606_UNSTIM_VS_CD40L_IL2_IL5_3DAY_STIMULATED_IRF4MID_SORTED_BCELL_DN	0.00421941	0.025207	0.326753	1.50148	0	144
GSE17580_UNINFECTED_VS_S_MANSONI_INF_TREG_UP	0.00440529	0.025207	0.321266	1.50147	0	153
GSE37532_TREG_VS_TCONV_PPARG_KO_CD4_TCELL_FROM_LN_UP	0.00465116	0.025207	0.315453	1.50116	0	178
SHIN_B_CELL_LYMPHOMA_CLUSTER_3	0.0566038	0.142466	0.49688	1.50093	23	19
GO_CELLULAR_RESPONSE_TO_ALCOHOL	0.0310559	0.0931048	0.372904	1.50088	9	62
PID_LYSOPHOSPHOLIPID_PATHWAY	0.0138504	0.0517621	0.395652	1.50088	4	44
GSE4748_LPS_VS_LPS_AND_CYANOBACTERIUM_LPSLIKE_STIM_DC_3H_UP	0.00421941	0.025207	0.332061	1.5007	0	133
COLDREN_GEFITINIB_RESISTANCE_UP	0.0339506	0.0988922	0.371406	1.50058	10	60
HINATA_NFKB_TARGETS_KERATINOCYTE_UP	0.0168539	0.0599031	0.393664	1.50055	5	45
V$AR_Q2	0.0161812	0.058007	0.372404	1.5003	4	67
V$CEBP_C	0.00389105	0.025207	0.339971	1.50008	0	115
GO_NUCLEUS_LOCALIZATION	0.0632319	0.154259	0.516574	1.49995	26	16
ATTACAT,MIR-380-3P	0.0159236	0.057361	0.366653	1.49992	4	69
MARIADASON_RESPONSE_TO_BUTYRATE_SULINDAC_6	0.0274725	0.0854359	0.401881	1.49981	9	41
ATCATGA,MIR-433	0.00689655	0.0319031	0.350908	1.49944	1	89
EGFR_UP.V1_UP	0.00392157	0.025207	0.337243	1.4986	0	121
GO_PLATELET_DERIVED_GROWTH_FACTOR_RECEPTOR_SIGNALING_PATHWAY	0.0373134	0.105866	0.471603	1.49846	14	23
GACTGTT,MIR-212,MIR-132	0.00735294	0.0333547	0.336628	1.4984	1	111
MORF_JAG1	0.0166667	0.0594118	0.387492	1.49835	5	47
V$TFIII_Q6	0.00729927	0.0331676	0.338612	1.49819	1	105
GNF2_TTK	0.0298103	0.0903047	0.407439	1.49815	10	38
GSE23321_CD8_STEM_CELL_MEMORY_VS_CENTRAL_MEMORY_CD8_TCELL_UP	0.00961538	0.0392385	0.357581	1.4981	2	79
GSE37301_PRO_BCELL_VS_RAG2_KO_NK_CELL_DN	0.003861	0.025207	0.329516	1.49762	0	129
TGCTGAY_UNKNOWN	0.00558659	0.0274329	0.297547	1.49742	0	283
STARK_HYPPOCAMPUS_22Q11_DELETION_UP	0.0329114	0.096817	0.428141	1.49714	12	32
GSE26290_CTRL_VS_AKT_INHIBITOR_TREATED_ANTI_CD3_AND_IL2_STIM_CD8_TCELL_UP	0.00714286	0.0326125	0.341217	1.49707	1	100
V$GATA1_05	0.00393701	0.025207	0.336038	1.49681	0	123
GSE7460_CTRL_VS_TGFB_TREATED_ACT_TREG_UP	0.00456621	0.025207	0.317685	1.4967	0	161
V$GATA6_01	0.00754717	0.0340043	0.336128	1.49663	1	113
MODULE_337	0.0273556	0.0852713	0.375819	1.49639	8	56
GSE37416_12H_VS_24H_F_TULARENSIS_LVS_NEUTROPHIL_UP	0.00458716	0.025207	0.31664	1.49636	0	160
GO_LYMPHOCYTE_ACTIVATION_INVOLVED_IN_IMMUNE_RESPONSE	0.0183486	0.0637539	0.376854	1.49631	5	55
DEBIASI_APOPTOSIS_BY_REOVIRUS_INFECTION_UP	0.00505051	0.0257292	0.300098	1.49622	0	260
GSE11864_CSF1_VS_CSF1_PAM3CYS_IN_MAC_DN	0.003861	0.025207	0.329198	1.49617	0	129
GSE22935_24H_VS_48H_MBOVIS_BCG_STIM_MACROPHAGE_UP	0.00362319	0.025207	0.338071	1.49611	0	107
BRUINS_UVC_RESPONSE_EARLY_LATE	0.00483092	0.025207	0.305176	1.49562	0	228
GO_ESTABLISHMENT_OF_PROTEIN_LOCALIZATION_TO_GOLGI	0.0566038	0.142466	0.495077	1.49548	23	19
MODULE_257	0.004	0.025207	0.336588	1.49521	0	124
GSE14000_UNSTIM_VS_16H_LPS_DC_DN	0.00469484	0.025207	0.319684	1.49464	0	156
GSE9509_10MIN_VS_30MIN_LPS_AND_IL10_STIM_IL10_KO_MACROPHAGE_DN	0.00732601	0.0332665	0.335585	1.49448	1	110
GO_POSITIVE_REGULATION_OF_CYTOKINE_BIOSYNTHETIC_PROCESS	0.0425	0.115493	0.455814	1.49441	16	25
GO_EMBRYONIC_CRANIAL_SKELETON_MORPHOGENESIS	0.0373134	0.105866	0.470304	1.49433	14	23
GSE360_L_MAJOR_VS_B_MALAYI_HIGH_DOSE_MAC_UP	0.00701754	0.0322103	0.340012	1.49432	1	99
GO_OUTFLOW_TRACT_MORPHOGENESIS	0.041769	0.114346	0.474653	1.49423	16	22
GO_NUCLEAR_REPLICATION_FORK	0.0319149	0.0947958	0.409974	1.49412	11	37
GO_CYTOPLASMIC_MICROTUBULE_ORGANIZATION	0.0344828	0.100071	0.420999	1.49405	12	34
GSE21546_WT_VS_ELK1_KO_ANTI_CD3_STIM_DP_THYMOCYTES_DN	0.00460829	0.025207	0.317294	1.49402	0	158
GSE4535_BM_DERIVED_DC_VS_FOLLICULAR_DC_DN	0.00406504	0.025207	0.328785	1.49388	0	131
GSE44649_NAIVE_VS_ACTIVATED_CD8_TCELL_MIR155_KO_DN	0.00465116	0.025207	0.315633	1.49383	0	171
V$E4BP4_01	0.0045045	0.025207	0.322908	1.49375	0	150
LEE_LIVER_CANCER_MYC_DN	0.041769	0.114346	0.474461	1.49362	16	22
GO_NEURON_DEVELOPMENT	0.00621118	0.0296907	0.29135	1.49356	0	339
GSE25846_IL10_POS_VS_NEG_CD8_TCELL_DAY7_POST_CORONAVIRUS_BRAIN_UP	0.00701754	0.0322103	0.339726	1.49307	1	99
GO_NEURON_PROJECTION_DEVELOPMENT	0.0052356	0.0262213	0.295636	1.49295	0	273
KANNAN_TP53_TARGETS_UP	0.0296496	0.0899405	0.400486	1.49271	10	40
LANG_MYB_FAMILY_TARGETS	0.0425	0.115493	0.44377	1.49268	16	28
GO_DIOXYGENASE_ACTIVITY	0.0276074	0.0856953	0.373553	1.49255	8	57
GO_POSITIVE_REGULATION_OF_AXON_EXTENSION	0.041769	0.114346	0.474067	1.49238	16	22
GSE17301_IFNA2_VS_IFNA2_AND_ACD3_ACD28_STIM_CD8_TCELL_UP	0.00909091	0.0381612	0.3139	1.49228	1	166
GO_STEROID_HORMONE_RECEPTOR_BINDING	0.0307692	0.0925367	0.368199	1.49227	9	61
CAAGGAT,MIR-362	0.0193906	0.066235	0.393209	1.49161	6	44
GO_TISSUE_MORPHOGENESIS	0.005	0.0255893	0.301117	1.49148	0	247
GO_SENSORY_ORGAN_MORPHOGENESIS	0.00662252	0.030828	0.345311	1.49131	1	91
GO_CHONDROCYTE_DIFFERENTIATION	0.0425	0.115493	0.443346	1.49125	16	28
V$HNF4_01_B	0.00420168	0.025207	0.326192	1.49114	0	140
GO_DNA_GEOMETRIC_CHANGE	0.0125786	0.0482446	0.354973	1.49112	3	78
REACTOME_RECRUITMENT_OF_MITOTIC_CENTROSOME_PROTEINS_AND_COMPLEXES	0.0310559	0.0931048	0.370352	1.49061	9	62
MIYAGAWA_TARGETS_OF_EWSR1_ETS_FUSIONS_DN	0.00671141	0.0311439	0.350407	1.49059	1	84
HUANG_GATA2_TARGETS_DN	0.021148	0.0707517	0.383911	1.48967	6	50
BONOME_OVARIAN_CANCER_SURVIVAL_SUBOPTIMAL_DEBULKING	0.0060241	0.0291518	0.290626	1.48966	0	334
GO_REGULATION_OF_CELL_MORPHOGENESIS	0.00581395	0.0283303	0.293198	1.48962	0	312
GO_REGULATION_OF_GLUCOSE_TRANSPORT	0.022508	0.0739946	0.369769	1.48946	6	64
GO_POSITIVE_REGULATION_OF_ERK1_AND_ERK2_CASCADE	0.0210843	0.0706521	0.375076	1.48921	6	54
GO_MYELOID_CELL_DIFFERENTIATION	0.00392157	0.025207	0.335056	1.48888	0	121
GSE5589_LPS_VS_LPS_AND_IL6_STIM_IL10_KO_MACROPHAGE_45MIN_DN	0.00444444	0.025207	0.319944	1.48865	0	151
GSE3982_DC_VS_TH1_DN	0.0045045	0.025207	0.321762	1.48845	0	150
MTOR_UP.V1_DN	0.0103806	0.0416099	0.342631	1.48834	2	95
GSE2770_UNTREATED_VS_IL12_TREATED_ACT_CD4_TCELL_48H_UP	0.0044843	0.025207	0.317345	1.48823	0	154
GO_BHLH_TRANSCRIPTION_FACTOR_BINDING	0.058548	0.145817	0.504915	1.48816	24	17
chr4p16	0.0275229	0.085493	0.368456	1.48798	8	63
GO_AMINO_ACID_TRANSMEMBRANE_TRANSPORT	0.0330789	0.0971169	0.42995	1.4878	12	31
GO_RESPONSE_TO_TEMPERATURE_STIMULUS	0.022293	0.0734759	0.363654	1.48765	6	69
GSE9006_1MONTH_VS_4MONTH_POST_TYPE_1_DIABETES_DX_PBMC_UP	0.00754717	0.0340043	0.334049	1.48737	1	113
GSE43863_NAIVE_VS_LY6C_LOW_CXCR5NEG_CD4_EFF_TCELL_D6_LCMV_UP	0.0128205	0.0487794	0.351591	1.48721	3	81
V$EGR1_01	0.00480769	0.025207	0.31002	1.487	0	192
GSE26669_CTRL_VS_COSTIM_BLOCK_MLR_CD8_TCELL_DN	0.0042735	0.025207	0.323188	1.48679	0	146
MORF_NOS2A	0.00401606	0.025207	0.332308	1.48677	0	125
GSE30971_CTRL_VS_LPS_STIM_MACROPHAGE_WBP7_KO_4H_UP	0.00380228	0.025207	0.334932	1.48656	0	114
V$FOXO3_01	0.00406504	0.025207	0.323952	1.48631	0	136
GO_RESPONSE_TO_MOLECULE_OF_BACTERIAL_ORIGIN	0.00458716	0.025207	0.316091	1.48587	0	157
GSE22935_WT_VS_MYD88_KO_MACROPHAGE_12H_MBOVIS_BCG_STIM_DN	0.00420168	0.025207	0.329512	1.48576	0	132
GSE11864_CSF1_IFNG_VS_CSF1_PAM3CYS_IN_MAC_DN	0.00416667	0.025207	0.326696	1.48552	0	134
GSE38681_WT_VS_LYL1_KO_LYMPHOID_PRIMED_MULTIPOTENT_PROGENITOR_DN	0.0044843	0.025207	0.316761	1.48549	0	154
BIOCARTA_PPARA_PATHWAY	0.0296496	0.0899405	0.398542	1.48547	10	40
WIERENGA_STAT5A_TARGETS_GROUP2	0.0298103	0.0903047	0.403983	1.48544	10	38
GO_ENDOTHELIAL_CELL_DEVELOPMENT	0.0233766	0.0761625	0.436194	1.48532	8	30
V$FOXO1_01	0.00393701	0.025207	0.331269	1.48526	0	126
STK33_NOMO_UP	0.00465116	0.025207	0.313796	1.48513	0	171
GO_POST_EMBRYONIC_DEVELOPMENT	0.0213415	0.0711845	0.377032	1.48512	6	53
GO_REGULATION_OF_GASTRULATION	0.0785219	0.18015	0.519861	1.4851	33	15
GO_REGULATION_OF_DNA_TEMPLATED_TRANSCRIPTION_IN_RESPONSE_TO_STRESS	0.0210843	0.0706521	0.374022	1.48503	6	54
VERHAAK_GLIOBLASTOMA_PRONEURAL	0.00729927	0.0331676	0.335216	1.48475	1	106
GARGALOVIC_RESPONSE_TO_OXIDIZED_PHOSPHOLIPIDS_MAGENTA_UP	0.039801	0.11094	0.467207	1.48449	15	23
GSE21927_SPLEEN_VS_TUMOR_MONOCYTE_BALBC_UP	0.0132013	0.0499432	0.349608	1.48445	3	83
PILON_KLF1_TARGETS_UP	0.00564972	0.0276614	0.294935	1.48418	0	279
V$HNF4ALPHA_Q6	0.004329	0.025207	0.32105	1.48416	0	147
GSE3720_UNSTIM_VS_LPS_STIM_VD1_GAMMADELTA_TCELL_UP	0.0041841	0.025207	0.321347	1.4835	0	145
GO_PROTEIN_MONOUBIQUITINATION	0.0255682	0.0810064	0.383931	1.48347	8	48
GSE21360_PRIMARY_VS_QUATERNARY_MEMORY_CD8_TCELL_DN	0.00471698	0.025207	0.313175	1.48332	0	172
GO_NUCLEAR_TRANSCRIPTION_FACTOR_COMPLEX	0.00714286	0.0326125	0.336869	1.48315	1	101
GSE17721_CTRL_VS_POLYIC_6H_BMDC_DN	0.00393701	0.025207	0.330791	1.48311	0	126
GSE45382_UNTREATED_VS_TGFB_TREATED_MACROPHAGES_DN	0.00401606	0.025207	0.331369	1.48256	0	125
BROWNE_HCMV_INFECTION_24HR_UP	0.00724638	0.0329835	0.335884	1.48249	1	103
GSE3039_NKT_CELL_VS_B2_BCELL_DN	0.00408163	0.025207	0.335551	1.48246	0	120
GSE46606_IRF4HIGH_VS_IRF4MID_CD40L_IL2_IL5_DAY3_STIMULATED_BCELL_DN	0.00414938	0.025207	0.324842	1.48223	0	135
TAGGTCA,MIR-192,MIR-215	0.0388601	0.109047	0.420652	1.48217	14	33
V$AR_Q6	0.00406504	0.025207	0.323011	1.482	0	136
GSE21063_CTRL_VS_ANTI_IGM_STIM_BCELL_NFATC1_KO_16H_DN	0.0044843	0.025207	0.315986	1.48186	0	154
TTTGTAG,MIR-520D	0.00478469	0.025207	0.300761	1.48178	0	234
GO_RNA_POLYMERASE_II_TRANSCRIPTION_FACTOR_BINDING	0.0160772	0.057805	0.360439	1.48101	4	71
GSE26928_NAIVE_VS_CXCR5_POS_CD4_TCELL_DN	0.00420168	0.025207	0.322958	1.48033	0	143
V$TCF4_Q5	0.00724638	0.0329835	0.335361	1.48018	1	103
FRIDMAN_IMMORTALIZATION_DN	0.0589623	0.146576	0.48996	1.48003	24	19
GSE23925_LIGHT_ZONE_VS_NAIVE_BCELL_UP	0.00414938	0.025207	0.324354	1.48	0	135
SRC_UP.V1_DN	0.00668896	0.0310722	0.343536	1.47995	1	92
chr17q12	0.0302198	0.0911929	0.396558	1.47995	10	41
GO_RETINA_DEVELOPMENT_IN_CAMERA_TYPE_EYE	0.021148	0.0707517	0.381323	1.47962	6	50
GSE7218_UNSTIM_VS_ANTIGEN_STIM_THROUGH_IGM_BCELL_DN	0.0341615	0.0993545	0.367557	1.47936	10	62
GSE3982_MAC_VS_EFF_MEMORY_CD4_TCELL_DN	0.00389105	0.025207	0.334811	1.47934	0	117
GO_TRANSCRIPTION_FACTOR_ACTIVITY_DIRECT_LIGAND_REGULATED_SEQUENCE_SPECIFIC_DNA_BINDING	0.0598086	0.14821	0.484288	1.47923	24	20
V$CREB_Q2	0.00465116	0.025207	0.311747	1.4788	0	177
GTTNYYNNGGTNA_UNKNOWN	0.0401235	0.111245	0.365748	1.47772	12	60
GO_CARDIAC_CELL_DEVELOPMENT	0.046683	0.124153	0.469296	1.47736	18	22
GSE18791_UNSTIM_VS_NEWCATSLE_VIRUS_DC_6H_UP	0.00888889	0.0377891	0.311209	1.47734	1	164
REACTOME_TRANSCRIPTIONAL_REGULATION_OF_WHITE_ADIPOCYTE_DIFFERENTIATION	0.0216049	0.0717581	0.380709	1.47722	6	51
GSE13484_3H_UNSTIM_VS_YF17D_VACCINE_STIM_PBMC_DN	0.00421941	0.025207	0.326838	1.4771	0	133
GNF2_CD7	0.0655738	0.158003	0.50116	1.4771	27	17
GO_FAT_CELL_DIFFERENTIATION	0.0183486	0.0637539	0.37199	1.477	5	55
GSE3982_EOSINOPHIL_VS_BASOPHIL_UP	0.00401606	0.025207	0.329495	1.47645	0	127
GSE1460_INTRATHYMIC_T_PROGENITOR_VS_CD4_THYMOCYTE_DN	0.00416667	0.025207	0.324692	1.47641	0	134
GO_REGULATION_OF_DNA_TEMPLATED_TRANSCRIPTION_INITIATION	0.045	0.120737	0.450261	1.4762	17	25
GO_NEGATIVE_REGULATION_OF_CHROMOSOME_ORGANIZATION	0.00664452	0.0309196	0.346636	1.47607	1	85
YNTTTNNNANGCARM_UNKNOWN	0.037037	0.105306	0.455977	1.47595	14	24
GO_REGULATION_OF_CELL_DEVELOPMENT	0.00806452	0.0353323	0.282883	1.47591	0	424
KEGG_JAK_STAT_SIGNALING_PATHWAY	0.0160772	0.057805	0.359104	1.47553	4	71
GO_NEGATIVE_REGULATION_OF_ACTIN_FILAMENT_DEPOLYMERIZATION	0.0556901	0.14097	0.475962	1.47548	22	21
GSE29617_CTRL_VS_DAY7_TIV_FLU_VACCINE_PBMC_2008_UP	0.00389105	0.025207	0.32619	1.47547	0	128
GSE20152_SPHK1_KO_VS_WT_HTNFA_OVERXPRESS_ANKLE_UP	0.00420168	0.025207	0.327182	1.47526	0	132
TCCAGAT,MIR-516-5P	0.0134228	0.050566	0.346761	1.47508	3	84
GO_VENTRICULAR_SYSTEM_DEVELOPMENT	0.0589623	0.146576	0.488256	1.47488	24	19
GO_CELLULAR_COMPONENT_DISASSEMBLY_INVOLVED_IN_EXECUTION_PHASE_OF_APOPTOSIS	0.0388601	0.109047	0.418509	1.47461	14	33
GO_RECEPTOR_SIGNALING_PROTEIN_ACTIVITY	0.00754717	0.0340043	0.331778	1.47441	1	116
GO_NUCLEAR_CHROMOSOME	0.00793651	0.0349784	0.2829	1.47435	0	423
GSE45739_UNSTIM_VS_ACD3_ACD28_STIM_WT_CD4_TCELL_UP	0.00729927	0.0331676	0.333198	1.47423	1	105
KEGG_LYSINE_DEGRADATION	0.0405405	0.112041	0.414813	1.47422	14	35
BIDUS_METASTASIS_UP	0.00483092	0.025207	0.307908	1.47416	0	191
GO_POSITIVE_REGULATION_OF_INTERLEUKIN_10_PRODUCTION	0.0655738	0.158003	0.500145	1.4741	27	17
V$GCM_Q2	0.003861	0.025207	0.324324	1.47402	0	129
V$E2A_Q2	0.00408163	0.025207	0.333488	1.47334	0	120
CATGTAA,MIR-496	0.00389105	0.025207	0.325637	1.47297	0	128
SAFFORD_T_LYMPHOCYTE_ANERGY	0.0267857	0.0839068	0.381356	1.47292	8	49
HORIUCHI_WTAP_TARGETS_UP	0.00934579	0.0384325	0.31134	1.47284	1	176
GO_REGULATION_OF_CELL_MATRIX_ADHESION	0.0309598	0.092942	0.368818	1.47239	9	58
GO_REGULATION_OF_EXTENT_OF_CELL_GROWTH	0.0241692	0.0779636	0.379451	1.47236	7	50
GSE24210_RESTING_TREG_VS_TCONV_UP	0.00904977	0.0381206	0.309819	1.47228	1	167
GO_CELLULAR_RESPONSE_TO_IONIZING_RADIATION	0.022409	0.0738034	0.388996	1.47172	7	43
GO_CHROMOSOMAL_REGION	0.00558659	0.0274329	0.29243	1.47167	0	283
GO_PROTEIN_ALKYLATION	0.0128205	0.0487794	0.34615	1.47163	3	82
GO_PROTEIN_METHYLATION	0.0128205	0.0487794	0.34615	1.47163	3	82
GO_EPITHELIAL_CELL_DEVELOPMENT	0.00680272	0.0315128	0.341523	1.47139	1	93
PEDERSEN_METASTASIS_BY_ERBB2_ISOFORM_1	0.0556901	0.14097	0.474636	1.47136	22	21
GO_NEGATIVE_REGULATION_OF_ADAPTIVE_IMMUNE_RESPONSE	0.0785219	0.18015	0.515021	1.47127	33	15
CCAWNWWNNNGGC_UNKNOWN	0.0254777	0.080835	0.359647	1.47126	7	69
PTEN_DN.V2_DN	0.0157233	0.0568391	0.350194	1.47105	4	78
GO_CORONARY_VASCULATURE_DEVELOPMENT	0.046683	0.124153	0.467287	1.47104	18	22
TTCCGTT,MIR-191	0.0645933	0.156546	0.481566	1.47092	26	20
LU_AGING_BRAIN_UP	0.00930233	0.038301	0.310352	1.47089	1	168
GSE43863_DAY6_EFF_VS_DAY150_MEM_LY6C_INT_CXCR5POS_CD4_TCELL_UP	0.00409836	0.025207	0.321307	1.47045	0	139
GSE25088_IL4_VS_IL4_AND_ROSIGLITAZONE_STIM_MACROPHAGE_DAY10_UP	0.00403226	0.025207	0.320231	1.47038	0	138
V$NFMUE1_Q6	0.00490196	0.0253208	0.306391	1.47027	0	209
GSE7764_NKCELL_VS_SPLENOCYTE_UP	0.00393701	0.025207	0.32999	1.46987	0	123
[truncated: 11,334 more rows]

## Sheet: CS vs VS
Supplementary Table 2c: GSEA Comparing Tumor Cells from the Spleen (S) of Cyclophosphamide (C ) and PBS (V) treated mice engrafted with DFBL-20954. Positive enrichment scores indicate gene sets expressed higher in C as compared to PBS determined by the ordering of the rank ordered differential expression lists.
pathway	pval	padj	ES	NES	nMoreExtreme	size
DUTERTRE_ESTRADIOL_RESPONSE_24HR_UP	0.0013459	0.02584	0.652315	2.92232	0	270
KOBAYASHI_EGFR_SIGNALING_24HR_DN	0.0013986	0.02584	0.667697	2.90817	0	211
HALLMARK_TNFA_SIGNALING_VIA_NFKB	0.00149477	0.02584	0.709487	2.90405	0	132
CHEN_HOXA5_TARGETS_9HR_UP	0.00143266	0.02584	0.67291	2.87437	0	187
GSE9988_LOW_LPS_VS_CTRL_TREATED_MONOCYTE_UP	0.00151286	0.02584	0.708242	2.86975	0	115
VERNELL_RETINOBLASTOMA_PATHWAY_UP	0.00162866	0.02584	0.786194	2.85621	0	63
GSE15750_DAY6_VS_DAY10_EFF_CD8_TCELL_UP	0.00142248	0.02584	0.655367	2.78763	0	173
GRAHAM_NORMAL_QUIESCENT_VS_NORMAL_DIVIDING_DN	0.0016	0.02584	0.739615	2.78716	0	79
GSE9988_LPS_VS_CTRL_TREATED_MONOCYTE_UP	0.00151745	0.02584	0.693705	2.78692	0	111
PHONG_TNF_TARGETS_UP	0.00173611	0.02584	0.846242	2.77933	0	38
PODAR_RESPONSE_TO_ADAPHOSTIN_UP	0.00149477	0.02584	0.677657	2.74817	0	121
GSE2770_UNTREATED_VS_IL12_TREATED_ACT_CD4_TCELL_6H_UP	0.00146843	0.02584	0.665115	2.73919	0	142
GSE9988_LOW_LPS_VS_VEHICLE_TREATED_MONOCYTE_UP	0.00153374	0.02584	0.676188	2.72856	0	114
HELLER_SILENCED_BY_METHYLATION_DN	0.00159744	0.02584	0.726942	2.72562	0	75
KRIGE_AMINO_ACID_DEPRIVATION	0.0017331	0.02584	0.900983	2.71771	0	24
ROSTY_CERVICAL_CANCER_PROLIFERATION_CLUSTER	0.00149477	0.02584	0.662235	2.71238	0	133
ZHANG_TLX_TARGETS_36HR_DN	0.00142248	0.02584	0.636709	2.70826	0	173
ZHANG_TLX_TARGETS_DN	0.00161551	0.02584	0.712962	2.70362	0	83
KAUFFMANN_MELANOMA_RELAPSE_UP	0.00164204	0.02584	0.75082	2.70216	0	60
WHITFIELD_CELL_CYCLE_S	0.00149477	0.02584	0.656287	2.68802	0	133
GSE14769_UNSTIM_VS_60MIN_LPS_BMDM_DN	0.00145985	0.02584	0.649408	2.68239	0	144
GSE9988_LPS_VS_VEHICLE_TREATED_MONOCYTE_UP	0.00149701	0.02584	0.662291	2.68216	0	113
CHANG_CYCLING_GENES	0.00149477	0.02584	0.650504	2.66433	0	133
ZHOU_CELL_CYCLE_GENES_IN_IR_RESPONSE_6HR	0.00158983	0.02584	0.708287	2.66049	0	76
GSE14769_UNSTIM_VS_80MIN_LPS_BMDM_DN	0.00146199	0.02584	0.642461	2.64969	0	139
GSE15750_DAY6_VS_DAY10_TRAF6KO_EFF_CD8_TCELL_UP	0.00142653	0.02584	0.619018	2.62927	0	172
GNF2_FEN1	0.00166113	0.02584	0.737434	2.62818	0	56
ZHANG_TLX_TARGETS_60HR_DN	0.00137363	0.02584	0.592864	2.62583	0	244
GSE14769_UNSTIM_VS_40MIN_LPS_BMDM_DN	0.00144092	0.02584	0.631557	2.62193	0	148
RUIZ_TNC_TARGETS_DN	0.00155521	0.02584	0.657642	2.62058	0	109
SONG_TARGETS_OF_IE86_CMV_PROTEIN	0.00166667	0.02584	0.725383	2.58936	0	58
GSE39556_CD8A_DC_VS_NK_CELL_MOUSE_3H_POST_POLYIC_INJ_UP	0.00143472	0.02584	0.606002	2.58686	0	186
SEKI_INFLAMMATORY_RESPONSE_LPS_UP	0.0016835	0.02584	0.768468	2.58045	0	41
GRAHAM_CML_DIVIDING_VS_NORMAL_QUIESCENT_UP	0.001443	0.02584	0.616767	2.56773	0	150
GSE2706_UNSTIM_VS_2H_LPS_AND_R848_DC_DN	0.00153374	0.02584	0.631896	2.54983	0	114
GNF2_SMC4L1	0.00161812	0.02584	0.667878	2.53959	0	84
GSE13547_CTRL_VS_ANTI_IGM_STIM_BCELL_12H_UP	0.00142653	0.02584	0.602051	2.53018	0	159
MOLENAAR_TARGETS_OF_CCND1_AND_CDK4_DN	0.00168067	0.02584	0.728772	2.52868	0	49
WANG_RESPONSE_TO_GSK3_INHIBITOR_SB216763_DN	0.00132275	0.02584	0.558448	2.52305	0	304
GSE2706_UNSTIM_VS_2H_R848_DC_DN	0.00152672	0.02584	0.629941	2.52243	0	110
GSE21063_WT_VS_NFATC1_KO_8H_ANTI_IGM_STIM_BCELL_UP	0.0014245	0.02584	0.591852	2.52132	0	177
PICCALUGA_ANGIOIMMUNOBLASTIC_LYMPHOMA_DN	0.00151286	0.02584	0.620653	2.51192	0	117
GOBERT_OLIGODENDROCYTE_DIFFERENTIATION_UP	0.00122549	0.02584	0.533832	2.51068	0	473
ZHAN_MULTIPLE_MYELOMA_CD1_VS_CD2_UP	0.00169205	0.02584	0.737493	2.50847	0	43
SMIRNOV_RESPONSE_TO_IR_2HR_UP	0.0016835	0.02584	0.744919	2.50138	0	41
PYEON_CANCER_HEAD_AND_NECK_VS_CERVICAL_UP	0.00143885	0.02584	0.601309	2.50125	0	149
KONG_E2F3_TARGETS	0.00162866	0.02584	0.652167	2.49896	0	92
NAGASHIMA_NRG1_SIGNALING_UP	0.0015083	0.02584	0.618249	2.49888	0	119
GNF2_CENPF	0.00165289	0.02584	0.69333	2.49746	0	61
STEIN_ESR1_TARGETS	0.00166113	0.02584	0.699641	2.49349	0	56
ZHANG_RESPONSE_TO_IKK_INHIBITOR_AND_TNF_UP	0.00148588	0.02584	0.608942	2.4929	0	131
GHANDHI_DIRECT_IRRADIATION_UP	0.00164474	0.02584	0.717475	2.4902	0	48
STEIN_ESRRA_TARGETS_RESPONSIVE_TO_ESTROGEN_DN	0.0017301	0.02584	0.785034	2.48942	0	32
GSE21360_SECONDARY_VS_QUATERNARY_MEMORY_CD8_TCELL_UP	0.00159236	0.02584	0.637556	2.48397	0	100
AMIT_EGF_RESPONSE_40_HELA	0.00172117	0.02584	0.770095	2.48302	0	34
BENPORATH_PROLIFERATION	0.00148588	0.02584	0.605584	2.47915	0	131
GSE2706_UNSTIM_VS_2H_LPS_DC_DN	0.00155039	0.02584	0.622547	2.47864	0	108
GNF2_PCNA	0.00164745	0.02584	0.676973	2.47834	0	67
SENGUPTA_NASOPHARYNGEAL_CARCINOMA_UP	0.0013986	0.02584	0.568955	2.4781	0	211
GSE30962_PRIMARY_VS_SECONDARY_ACUTE_LCMV_INF_CD8_TCELL_UP	0.00142248	0.02584	0.584288	2.47116	0	166
GSE26343_UNSTIM_VS_LPS_STIM_NFAT5_KO_MACROPHAGE_DN	0.00146199	0.02584	0.598213	2.4672	0	139
GSE40274_CTRL_VS_FOXP3_TRANSDUCED_ACTIVATED_CD4_TCELL_UP	0.00141443	0.02584	0.581663	2.46448	0	165
MTOR_UP.N4.V1_UP	0.00142653	0.02584	0.585828	2.462	0	159
GO_REGULATION_OF_TRANSCRIPTION_INVOLVED_IN_G1_S_TRANSITION_OF_MITOTIC_CELL_CYCLE	0.00173913	0.02584	0.80449	2.45562	0	25
GO_DNA_REPLICATION	0.0014245	0.02584	0.574723	2.45367	0	184
GSE12392_IFNAR_KO_VS_IFNB_KO_CD8_NEG_SPLEEN_DC_UP	0.00145138	0.02584	0.59179	2.45337	0	147
CONCANNON_APOPTOSIS_BY_EPOXOMICIN_UP	0.00142248	0.02584	0.575905	2.44963	0	173
GNF2_CDC2	0.00165289	0.02584	0.67965	2.44819	0	61
HALLMARK_E2F_TARGETS	0.0013947	0.02584	0.565286	2.44752	0	198
GSE9988_ANTI_TREM1_VS_ANTI_TREM1_AND_LPS_MONOCYTE_DN	0.00153374	0.02584	0.60651	2.4474	0	114
RASHI_RESPONSE_TO_IONIZING_RADIATION_2	0.00158983	0.02584	0.646909	2.44556	0	80
GSE40274_CTRL_VS_EOS_TRANSDUCED_ACTIVATED_CD4_TCELL_UP	0.00147929	0.02584	0.599351	2.44468	0	127
RB_P107_DN.V1_UP	0.00160256	0.02584	0.62923	2.443	0	98
BURTON_ADIPOGENESIS_3	0.00160514	0.02584	0.638261	2.44277	0	86
DIRMEIER_LMP1_RESPONSE_EARLY	0.00167224	0.02584	0.688458	2.44216	0	55
GSE9988_ANTI_TREM1_AND_LPS_VS_CTRL_TREATED_MONOCYTES_UP	0.0014881	0.02584	0.598864	2.4372	0	124
CHICAS_RB1_TARGETS_SENESCENT	0.00125786	0.02584	0.526289	2.43181	0	389
GARGALOVIC_RESPONSE_TO_OXIDIZED_PHOSPHOLIPIDS_BLUE_UP	0.0015949	0.02584	0.617841	2.42358	0	103
MODULE_158	0.00169205	0.02584	0.712132	2.42221	0	43
ZHAN_MULTIPLE_MYELOMA_CD1_UP	0.0017452	0.02584	0.769467	2.42005	0	31
GSE7348_UNSTIM_VS_LPS_STIM_MACROPHAGE_DN	0.00149701	0.02584	0.597177	2.41846	0	113
GO_G1_S_TRANSITION_OF_MITOTIC_CELL_CYCLE	0.00160256	0.02584	0.622833	2.41817	0	98
GO_CELL_CYCLE_G1_S_PHASE_TRANSITION	0.00160256	0.02584	0.622833	2.41817	0	98
FUJII_YBX1_TARGETS_DN	0.00142248	0.02584	0.56623	2.41529	0	182
MODULE_125	0.00168634	0.02584	0.708795	2.41198	0	44
GSE24634_TEFF_VS_TCONV_DAY10_IN_CULTURE_UP	0.00143885	0.02584	0.578789	2.40758	0	149
GO_DNA_DEPENDENT_DNA_REPLICATION	0.00160514	0.02584	0.628024	2.40359	0	86
GNF2_RFC4	0.00165017	0.02584	0.670295	2.4025	0	59
SOTIRIOU_BREAST_CANCER_GRADE_1_VS_3_UP	0.00147493	0.02584	0.583549	2.40216	0	143
WINNEPENNINCKX_MELANOMA_METASTASIS_UP	0.00147493	0.02584	0.583217	2.40079	0	143
GO_INTRINSIC_APOPTOTIC_SIGNALING_PATHWAY_IN_RESPONSE_TO_ENDOPLASMIC_RETICULUM_STRESS	0.00169492	0.02584	0.776071	2.39813	0	27
GSE25088_WT_VS_STAT6_KO_MACROPHAGE_DN	0.00146843	0.02584	0.58103	2.3929	0	142
GNF2_RRM1	0.00161551	0.02584	0.626749	2.39214	0	87
GSE40666_WT_VS_STAT1_KO_CD8_TCELL_WITH_IFNA_STIM_90MIN_DN	0.00144509	0.02584	0.573285	2.39174	0	154
GSE14000_UNSTIM_VS_4H_LPS_DC_TRANSLATED_RNA_DN	0.00157978	0.02584	0.603487	2.38962	0	107
CROONQUIST_STROMAL_STIMULATION_UP	0.0017331	0.02584	0.79221	2.38961	0	24
ALK_DN.V1_UP	0.00168067	0.02584	0.682706	2.38755	0	52
KANG_DOXORUBICIN_RESISTANCE_UP	0.00168067	0.02584	0.681618	2.38375	0	52
GSE2405_S_AUREUS_VS_UNTREATED_NEUTROPHIL_DN	0.00143678	0.02584	0.567837	2.3814	0	158
PID_FANCONI_PATHWAY	0.00169205	0.02584	0.699939	2.38074	0	43
LINDGREN_BLADDER_CANCER_CLUSTER_3_UP	0.00133156	0.02584	0.529014	2.37744	0	273
GO_TELOMERE_MAINTENANCE_VIA_RECOMBINATION	0.0017301	0.02584	0.748085	2.37225	0	32
GSE7219_WT_VS_NIK_NFKB2_KO_DC_UP	0.00146843	0.02584	0.575485	2.37007	0	142
TSAI_RESPONSE_TO_IONIZING_RADIATION	0.00155521	0.02584	0.594464	2.36883	0	109
CHO_NR4A1_TARGETS	0.00182815	0.0261512	0.876148	2.36301	0	16
GSE20754_WT_VS_TCF1_KO_MEMORY_CD8_TCELL_UP	0.00144092	0.02584	0.564223	2.35963	0	155
FERREIRA_EWINGS_SARCOMA_UNSTABLE_VS_STABLE_UP	0.0014771	0.02584	0.57317	2.35913	0	138
GSE3920_UNTREATED_VS_IFNG_TREATED_ENDOTHELIAL_CELL_UP	0.00161031	0.02584	0.618799	2.35895	0	85
V$E2F_Q6	0.00143472	0.02584	0.552421	2.35814	0	186
GSE3920_UNTREATED_VS_IFNA_TREATED_FIBROBLAST_UP	0.00150376	0.02584	0.579209	2.35784	0	129
SAGIV_CD24_TARGETS_DN	0.00172414	0.02584	0.748951	2.3522	0	30
PACHER_TARGETS_OF_IGF1_AND_IGF2_UP	0.00169492	0.02584	0.760997	2.35155	0	27
BLUM_RESPONSE_TO_SALIRASIB_UP	0.00140252	0.02584	0.539325	2.35131	0	215
PHONG_TNF_RESPONSE_VIA_P38_PARTIAL	0.00157729	0.02584	0.594156	2.35118	0	106
V$E2F_Q4	0.00143062	0.02584	0.550361	2.35003	0	189
MODULE_54	0.00138504	0.02584	0.536503	2.34877	0	220
PID_CD40_PATHWAY	0.00173913	0.02584	0.769338	2.34832	0	25
GSE39110_DAY3_VS_DAY6_POST_IMMUNIZATION_CD8_TCELL_DN	0.00144092	0.02584	0.564804	2.3448	0	148
GSE2706_UNSTIM_VS_8H_LPS_AND_R848_DC_DN	0.00149701	0.02584	0.57726	2.3378	0	113
GNF2_CCNA2	0.00164745	0.02584	0.636822	2.33135	0	67
GSE13547_CTRL_VS_ANTI_IGM_STIM_BCELL_2H_UP	0.00147929	0.02584	0.566253	2.33024	0	140
GERY_CEBP_TARGETS	0.00159236	0.02584	0.621823	2.32924	0	74
LINDSTEDT_DENDRITIC_CELL_MATURATION_A	0.00174825	0.02584	0.72049	2.32571	0	35
GARGALOVIC_RESPONSE_TO_OXIDIZED_PHOSPHOLIPIDS_RED_UP	0.00182482	0.0261512	0.874016	2.32527	0	15
ZHOU_CELL_CYCLE_GENES_IN_IR_RESPONSE_24HR	0.00151745	0.02584	0.577964	2.32194	0	111
GSE40274_FOXP3_VS_FOXP3_AND_EOS_TRANSDUCED_ACTIVATED_CD4_TCELL_DN	0.0014556	0.02584	0.560508	2.3205	0	146
GARCIA_TARGETS_OF_FLI1_AND_DAX1_DN	0.00146199	0.02584	0.562236	2.31882	0	139
REACTOME_ACTIVATION_OF_ATR_IN_RESPONSE_TO_REPLICATION_STRESS	0.00174825	0.02584	0.717417	2.31579	0	35
GOLDRATH_NAIVE_VS_EFF_CD8_TCELL_DN	0.00144092	0.02584	0.552616	2.31109	0	155
GSE7764_IL15_TREATED_VS_CTRL_NK_CELL_24H_UP	0.00143472	0.02584	0.545362	2.30982	0	171
NAGASHIMA_EGF_SIGNALING_UP	0.00173611	0.02584	0.706327	2.30897	0	37
GSE32986_CURDLAN_HIGHDOSE_VS_GMCSF_AND_CURDLAN_HIGHDOSE_STIM_DC_DN	0.0014771	0.02584	0.560585	2.30733	0	138
CHICAS_RB1_TARGETS_GROWING	0.00144509	0.02584	0.552835	2.30642	0	154
REACTOME_G1_S_SPECIFIC_TRANSCRIPTION	0.00184843	0.0262162	0.838091	2.3042	0	17
KEGG_MISMATCH_REPAIR	0.00174216	0.02584	0.775154	2.30226	0	22
GSE9988_ANTI_TREM1_VS_LOW_LPS_MONOCYTE_DN	0.00149701	0.02584	0.566011	2.29811	0	122
REACTOME_DNA_STRAND_ELONGATION	0.00172414	0.02584	0.731184	2.29639	0	30
GSE34392_ST2_KO_VS_WT_DAY8_LCMV_EFFECTOR_CD8_TCELL_DN	0.00149254	0.02584	0.565773	2.29251	0	120
REACTOME_ACTIVATION_OF_THE_PRE_REPLICATIVE_COMPLEX	0.00170068	0.02584	0.729516	2.28871	0	29
ALTEMEIER_RESPONSE_TO_LPS_WITH_MECHANICAL_VENTILATION	0.00163399	0.02584	0.630151	2.28812	0	64
GSE8515_IL1_VS_IL6_4H_STIM_MAC_UP	0.00149477	0.02584	0.558596	2.2879	0	133
BOQUEST_STEM_CELL_CULTURED_VS_FRESH_UP	0.00138696	0.02584	0.523646	2.28666	0	213
GSE32986_UNSTIM_VS_GMCSF_AND_CURDLAN_LOWDOSE_STIM_DC_UP	0.00142653	0.02584	0.538007	2.28518	0	172
GALINDO_IMMUNE_RESPONSE_TO_ENTEROTOXIN	0.00166667	0.02584	0.639724	2.28358	0	58
REACTOME_DNA_REPLICATION	0.0014245	0.02584	0.535697	2.2821	0	177
GSE24634_IL4_VS_CTRL_TREATED_NAIVE_CD4_TCELL_DAY7_DN	0.00147929	0.02584	0.5545	2.28188	0	140
AMUNDSON_RESPONSE_TO_ARSENITE	0.00142857	0.02584	0.53374	2.28015	0	185
LINDSTEDT_DENDRITIC_CELL_MATURATION_B	0.00171233	0.02584	0.684337	2.27587	0	40
SHEDDEN_LUNG_CANCER_POOR_SURVIVAL_A6	0.00125471	0.02584	0.492515	2.27539	0	385
MITSIADES_RESPONSE_TO_APLIDIN_UP	0.00127877	0.02584	0.496818	2.27432	0	341
REN_BOUND_BY_E2F	0.00164204	0.02584	0.631935	2.2743	0	60
GSE46606_UNSTIM_VS_CD40L_IL2_IL5_1DAY_STIMULATED_IRF4HIGH_SORTED_BCELL_DN	0.00146199	0.02584	0.551357	2.27395	0	139
V$E2F1_Q6	0.00143266	0.02584	0.532271	2.27362	0	187
GSE14769_UNSTIM_VS_20MIN_LPS_BMDM_DN	0.00148148	0.02584	0.555333	2.27251	0	130
GSE41176_UNSTIM_VS_ANTI_IGM_STIM_BCELL_1H_UP	0.00155039	0.02584	0.569149	2.26604	0	108
FURUKAWA_DUSP6_TARGETS_PCI35_DN	0.0016835	0.02584	0.64259	2.2633	0	54
GO_MITOTIC_RECOMBINATION	0.0016835	0.02584	0.673578	2.26182	0	41
GSE18791_CTRL_VS_NEWCASTLE_VIRUS_DC_18H_DN	0.00151745	0.02584	0.562583	2.26015	0	111
GSE19198_CTRL_VS_IL21_TREATED_TCELL_24H_UP	0.00148148	0.02584	0.553317	2.25583	0	126
GARGALOVIC_RESPONSE_TO_OXIDIZED_PHOSPHOLIPIDS_BLACK_UP	0.00170068	0.02584	0.723546	2.25425	0	28
GNF2_MCM4	0.00168919	0.02584	0.641583	2.2541	0	53
GO_CELLULAR_RESPONSE_TO_INTERLEUKIN_1	0.00173611	0.02584	0.688266	2.24993	0	37
CROONQUIST_IL6_DEPRIVATION_DN	0.0015748	0.02584	0.579994	2.24966	0	94
CHEN_LVAD_SUPPORT_OF_FAILING_HEART_UP	0.00165289	0.02584	0.628696	2.24689	0	57
V$E2F1DP1RB_01	0.00141844	0.02584	0.527386	2.24653	0	179
V$NFKAPPAB_01	0.00146199	0.02584	0.543945	2.24338	0	139
KEGG_CYTOKINE_CYTOKINE_RECEPTOR_INTERACTION	0.00163399	0.02584	0.61657	2.2388	0	64
TIAN_TNF_SIGNALING_VIA_NFKB	0.00182482	0.0261512	0.841415	2.23853	0	15
GSE7768_OVA_ALONE_VS_OVA_WITH_LPS_IMMUNIZED_MOUSE_WHOLE_SPLEEN_6H_DN	0.00149254	0.02584	0.55073	2.23156	0	120
GNF2_MSH2	0.00170068	0.02584	0.71626	2.23156	0	28
BASAKI_YBX1_TARGETS_UP	0.00138889	0.02584	0.507967	2.23053	0	224
WARTERS_IR_RESPONSE_5GY	0.00169492	0.02584	0.721831	2.23052	0	27
GRAHAM_CML_QUIESCENT_VS_NORMAL_QUIESCENT_UP	0.00165017	0.02584	0.622017	2.22946	0	59
BIOCARTA_ATM_PATHWAY	0.00181488	0.0261512	0.785981	2.22939	0	19
ZHAN_MULTIPLE_MYELOMA_PR_UP	0.0016835	0.02584	0.663659	2.22851	0	41
GO_DNA_SYNTHESIS_INVOLVED_IN_DNA_REPAIR	0.00165563	0.02584	0.6099	2.22581	0	66
KAN_RESPONSE_TO_ARSENIC_TRIOXIDE	0.00162602	0.02584	0.60151	2.2248	0	71
REACTOME_LAGGING_STRAND_SYNTHESIS	0.00181488	0.0261512	0.783698	2.22292	0	19
WHITFIELD_CELL_CYCLE_G1_S	0.0014881	0.02584	0.546186	2.22281	0	124
GSE17974_CTRL_VS_ACT_IL4_AND_ANTI_IL12_0.5H_CD4_TCELL_DN	0.00149477	0.02584	0.542374	2.22145	0	133
GEISS_RESPONSE_TO_DSRNA_UP	0.00169492	0.02584	0.718671	2.22075	0	27
REACTOME_G2_M_CHECKPOINTS	0.0016835	0.02584	0.660995	2.21957	0	41
GSE9988_ANTI_TREM1_VS_LPS_MONOCYTE_DN	0.0014881	0.02584	0.545077	2.2183	0	124
GSE30962_ACUTE_VS_CHRONIC_LCMV_SECONDARY_INF_CD8_TCELL_DN	0.00142857	0.02584	0.528948	2.21786	0	156
GSE14415_NATURAL_TREG_VS_TCONV_DN	0.00146628	0.02584	0.535741	2.21482	0	145
GSE46606_IRF4_KO_VS_WT_UNSTIM_BCELL_DN	0.0015949	0.02584	0.564598	2.21472	0	103
GSE3920_IFNA_VS_IFNG_TREATED_ENDOTHELIAL_CELL_UP	0.00150376	0.02584	0.543648	2.21308	0	129
GSE25088_WT_VS_STAT6_KO_MACROPHAGE_IL4_STIM_DN	0.00143472	0.02584	0.530005	2.21174	0	151
SARRIO_EPITHELIAL_MESENCHYMAL_TRANSITION_UP	0.00144092	0.02584	0.532453	2.21049	0	148
V$E2F4DP1_01	0.00143472	0.02584	0.51676	2.20592	0	186
IWANAGA_E2F1_TARGETS_INDUCED_BY_SERUM	0.00170068	0.02584	0.707919	2.20557	0	28
GSE30971_CTRL_VS_LPS_STIM_MACROPHAGE_WBP7_HET_2H_UP	0.00153374	0.02584	0.545704	2.20203	0	114
GNF2_CCNB2	0.00166113	0.02584	0.617771	2.20171	0	56
GNF2_CKS2	0.00167785	0.02584	0.631086	2.20083	0	50
GSE7219_UNSTIM_VS_LPS_AND_ANTI_CD40_STIM_NIK_NFKB2_KO_DC_DN	0.00146843	0.02584	0.534278	2.20036	0	142
PID_ATF2_PATHWAY	0.00172117	0.02584	0.665787	2.19787	0	39
GO_DNA_STRAND_ELONGATION	0.00172414	0.02584	0.698883	2.19495	0	30
ISHIDA_E2F_TARGETS	0.00167785	0.02584	0.62938	2.19488	0	50
GO_REPLICATION_FORK	0.00164204	0.02584	0.609865	2.19487	0	60
GSE9988_ANTI_TREM1_VS_CTRL_TREATED_MONOCYTES_UP	0.00148588	0.02584	0.535826	2.19357	0	131
GSE6674_CPG_VS_CPG_AND_ANTI_IGM_STIM_BCELL_DN	0.001443	0.02584	0.526777	2.19309	0	150
GO_CELLULAR_RESPONSE_TO_ALKALOID	0.00182482	0.0261512	0.824148	2.1926	0	15
YU_BAP1_TARGETS	0.00169492	0.02584	0.709398	2.1921	0	27
WILCOX_RESPONSE_TO_PROGESTERONE_UP	0.00157729	0.02584	0.55359	2.19066	0	106
GSE21678_WT_VS_FOXO1_FOXO3_KO_TREG_UP	0.00148148	0.02584	0.534268	2.1906	0	137
ST_TUMOR_NECROSIS_FACTOR_PATHWAY	0.00173913	0.02584	0.717536	2.1902	0	25
GSE2706_UNSTIM_VS_8H_R848_DC_DN	0.00155521	0.02584	0.549604	2.19007	0	109
DELPUECH_FOXO3_TARGETS_DN	0.0017331	0.02584	0.672465	2.18722	0	36
SCHEIDEREIT_IKK_TARGETS	0.00182815	0.0261512	0.810388	2.18565	0	16
GSE29617_CTRL_VS_DAY7_TIV_FLU_VACCINE_PBMC_2008_UP	0.0014771	0.02584	0.534252	2.18316	0	128
GOLDRATH_ANTIGEN_RESPONSE	0.0013245	0.02584	0.484882	2.18219	0	274
GSE35825_IFNA_VS_IFNG_STIM_MACROPHAGE_UP	0.00150602	0.02584	0.541463	2.18195	0	112
SGCGSSAAA_V$E2F1DP2_01	0.00148148	0.02584	0.531623	2.17975	0	137
V$E2F_02	0.00143266	0.02584	0.509701	2.17722	0	187
GSE14000_UNSTIM_VS_4H_LPS_DC_DN	0.00147929	0.02584	0.530703	2.1771	0	135
GSE32986_UNSTIM_VS_CURDLAN_HIGHDOSE_STIM_DC_UP	0.00142248	0.02584	0.514021	2.17398	0	166
V$E2F1_Q3	0.00143266	0.02584	0.508771	2.17324	0	187
WU_APOPTOSIS_BY_CDKN1A_VIA_TP53	0.00167785	0.02584	0.622528	2.17099	0	50
SMIRNOV_RESPONSE_TO_IR_6HR_UP	0.00148148	0.02584	0.532253	2.16995	0	126
KEGG_DNA_REPLICATION	0.00174825	0.02584	0.671726	2.1683	0	35
AMIT_DELAYED_EARLY_GENES	0.00182815	0.0261512	0.803397	2.1668	0	16
GHANDHI_BYSTANDER_IRRADIATION_UP	0.0017452	0.02584	0.688531	2.1655	0	31
PID_E2F_PATHWAY	0.00163399	0.02584	0.596231	2.16495	0	64
GSE42021_CD24HI_VS_CD24INT_TCONV_THYMUS_DN	0.00150602	0.02584	0.534807	2.16447	0	118
MISSIAGLIA_REGULATED_BY_METHYLATION_DN	0.00157978	0.02584	0.546566	2.16423	0	107
GO_REGULATION_OF_EPITHELIAL_CELL_APOPTOTIC_PROCESS	0.0017331	0.02584	0.717404	2.16397	0	24
GSE10239_NAIVE_VS_DAY4.5_EFF_CD8_TCELL_DN	0.00142653	0.02584	0.509364	2.16352	0	172
GSE16450_IMMATURE_VS_MATURE_NEURON_CELL_LINE_12H_IFNA_STIM_DN	0.00144092	0.02584	0.517914	2.16079	0	153
NOJIMA_SFRP2_TARGETS_UP	0.00178571	0.0261512	0.752275	2.16069	0	20
GSE19401_UNSTIM_VS_RETINOIC_ACID_STIM_FOLLICULAR_DC_DN	0.0014771	0.02584	0.524941	2.16062	0	138
V$E2F4DP2_01	0.00143266	0.02584	0.50562	2.15978	0	187
V$E2F1DP2_01	0.00143266	0.02584	0.50562	2.15978	0	187
V$E2F1DP1_01	0.00143266	0.02584	0.50562	2.15978	0	187
GO_DNA_STRAND_ELONGATION_INVOLVED_IN_DNA_REPLICATION	0.00173913	0.02584	0.706694	2.15711	0	25
CROONQUIST_NRAS_SIGNALING_DN	0.00164745	0.02584	0.586843	2.15602	0	70
DIRMEIER_LMP1_RESPONSE_LATE_UP	0.00170068	0.02584	0.633681	2.15587	0	45
GOLDRATH_EFF_VS_MEMORY_CD8_TCELL_UP	0.00142248	0.02584	0.509428	2.15562	0	168
GSE23568_CTRL_VS_ID3_TRANSDUCED_CD8_TCELL_DN	0.00143678	0.02584	0.512444	2.15424	0	163
GO_DNA_BIOSYNTHETIC_PROCESS	0.00157729	0.02584	0.544384	2.15423	0	106
AMIT_EGF_RESPONSE_60_MCF10A	0.0017331	0.02584	0.714038	2.15381	0	24
CROONQUIST_NRAS_VS_STROMAL_STIMULATION_DN	0.00162602	0.02584	0.58973	2.15346	0	65
GSE23505_IL6_IL1_VS_IL6_IL1_IL23_TREATED_CD4_TCELL_UP	0.00147929	0.02584	0.522469	2.15006	0	140
GSE24634_TREG_VS_TCONV_POST_DAY7_IL4_CONVERSION_UP	0.00143678	0.02584	0.511901	2.14681	0	158
GSE36891_UNSTIM_VS_POLYIC_TLR3_STIM_PERITONEAL_MACROPHAGE_UP	0.00164745	0.02584	0.585701	2.1442	0	67
KAUFFMANN_DNA_REPAIR_GENES	0.0013986	0.02584	0.490943	2.14314	0	217
RELA_DN.V1_UP	0.00164745	0.02584	0.583117	2.14233	0	70
GSE36476_CTRL_VS_TSST_ACT_72H_MEMORY_CD4_TCELL_YOUNG_DN	0.00141844	0.02584	0.50284	2.14197	0	179
GSE46606_IRF4MID_VS_WT_CD40L_IL2_IL5_DAY1_STIMULATED_BCELL_DN	0.0014881	0.02584	0.526091	2.14103	0	124
ZWANG_CLASS_3_TRANSIENTLY_INDUCED_BY_EGF	0.00148148	0.02584	0.522882	2.13971	0	130
TIAN_TNF_SIGNALING_NOT_VIA_NFKB	0.00184843	0.0262162	0.778149	2.1394	0	17
GO_STRAND_DISPLACEMENT	0.0017301	0.02584	0.692771	2.13709	0	26
GSE8515_CTRL_VS_IL1_4H_STIM_MAC_DN	0.00149477	0.02584	0.52169	2.13536	0	132
AMIT_SERUM_RESPONSE_40_MCF10A	0.00173913	0.02584	0.712317	2.13509	0	23
CSR_LATE_UP.V1_UP	0.00147929	0.02584	0.523401	2.13489	0	127
OSWALD_HEMATOPOIETIC_STEM_CELL_IN_COLLAGEN_GEL_UP	0.00144092	0.02584	0.514226	2.13482	0	148
GSE45365_WT_VS_IFNAR_KO_BCELL_MCMV_INFECTION_DN	0.00155039	0.02584	0.535497	2.13206	0	108
GSE34179_THPOK_KO_VS_WT_VA14I_NKTCELL_DN	0.00155521	0.02584	0.53491	2.13152	0	109
GAJATE_RESPONSE_TO_TRABECTEDIN_UP	0.0016835	0.02584	0.634709	2.1313	0	41
GNF2_TTK	0.00173611	0.02584	0.648827	2.13095	0	38
GO_DNA_REPLICATION_INITIATION	0.00169492	0.02584	0.689454	2.13047	0	27
OXFORD_RALA_OR_RALB_TARGETS_UP	0.00170068	0.02584	0.625051	2.12651	0	45
REACTOME_CELL_CYCLE_MITOTIC	0.00131926	0.02584	0.472138	2.12638	0	292
HALLMARK_APOPTOSIS	0.00153374	0.02584	0.526484	2.12448	0	114
PHONG_TNF_RESPONSE_NOT_VIA_P38	0.00137363	0.02584	0.479869	2.12394	0	235
GROSS_HYPOXIA_VIA_ELK3_DN	0.00159236	0.02584	0.541806	2.1233	0	102
GO_RECOMBINATIONAL_REPAIR	0.00165563	0.02584	0.581703	2.1229	0	66
HINATA_NFKB_TARGETS_FIBROBLAST_UP	0.00164474	0.02584	0.610751	2.11978	0	48
V$NFKAPPAB65_01	0.00150376	0.02584	0.520622	2.11935	0	129
GSE33292_WT_VS_TCF1_KO_DN3_THYMOCYTE_DN	0.00141844	0.02584	0.497291	2.11833	0	179
GSE9988_ANTI_TREM1_AND_LPS_VS_VEHICLE_TREATED_MONOCYTES_UP	0.00153374	0.02584	0.524831	2.11781	0	114
GSE45365_NK_CELL_VS_CD11B_DC_DN	0.00149701	0.02584	0.520929	2.11507	0	122
GSE3982_CTRL_VS_LPS_4H_MAC_DN	0.00143885	0.02584	0.507952	2.11292	0	149
GSE9316_IL6_KO_VS_IFNG_KO_INVIVO_EXPANDED_CD4_TCELL_DN	0.0014771	0.02584	0.51699	2.11262	0	128
GO_POSITIVE_REGULATION_OF_TRANSCRIPTION_FROM_RNA_POLYMERASE_II_PROMOTER_IN_RESPONSE_TO_STRESS	0.00184843	0.0262162	0.767695	2.11066	0	17
GSE21063_CTRL_VS_ANTI_IGM_STIM_BCELL_NFATC1_KO_8H_DN	0.00142857	0.02584	0.497778	2.10849	0	170
BROWNE_HCMV_INFECTION_2HR_UP	0.00182482	0.0261512	0.79227	2.10779	0	15
MARKEY_RB1_ACUTE_LOF_UP	0.0013947	0.02584	0.486705	2.10729	0	198
GSE14415_INDUCED_TREG_VS_TCONV_UP	0.00142653	0.02584	0.500622	2.10391	0	159
PUJANA_XPRSS_INT_NETWORK	0.00143678	0.02584	0.500229	2.10289	0	163
DEBIASI_APOPTOSIS_BY_REOVIRUS_INFECTION_UP	0.00134409	0.02584	0.470529	2.10283	0	260
GSE18791_CTRL_VS_NEWCASTLE_VIRUS_DC_10H_DN	0.00147929	0.02584	0.512574	2.10273	0	135
GSE14000_UNSTIM_VS_16H_LPS_DC_TRANSLATED_RNA_DN	0.0014881	0.02584	0.517112	2.10161	0	125
GSE42021_TREG_PLN_VS_CD24HI_TREG_THYMUS_UP	0.00146199	0.02584	0.509222	2.10017	0	139
PETROVA_PROX1_TARGETS_UP	0.00180832	0.0261512	0.750039	2.09802	0	18
GSE36476_CTRL_VS_TSST_ACT_40H_MEMORY_CD4_TCELL_OLD_DN	0.00143472	0.02584	0.491947	2.09695	0	183
WHITEFORD_PEDIATRIC_CANCER_MARKERS	0.00155039	0.02584	0.526676	2.09694	0	108
GSE18893_TCONV_VS_TREG_24H_TNF_STIM_UP	0.00141844	0.02584	0.492089	2.09618	0	179
BLUM_RESPONSE_TO_SALIRASIB_DN	0.00132275	0.02584	0.463927	2.09601	0	304
BURTON_ADIPOGENESIS_PEAK_AT_16HR	0.00173611	0.02584	0.641095	2.09573	0	37
GSE30962_ACUTE_VS_CHRONIC_LCMV_PRIMARY_INF_CD8_TCELL_DN	0.00144092	0.02584	0.50111	2.09569	0	155
BERENJENO_TRANSFORMED_BY_RHOA_UP	0.00124069	0.02584	0.447933	2.09467	0	438
REACTOME_S_PHASE	0.00158479	0.02584	0.531045	2.09235	0	104
GSE18791_CTRL_VS_NEWCASTLE_VIRUS_DC_12H_DN	0.0014881	0.02584	0.513761	2.09086	0	124
REACTOME_SYNTHESIS_OF_DNA	0.0015949	0.02584	0.544397	2.09053	0	89
NEMETH_INFLAMMATORY_RESPONSE_LPS_UP	0.00164745	0.02584	0.568892	2.09007	0	70
STK33_UP	0.00141044	0.02584	0.489627	2.09003	0	180
LEE_LIVER_CANCER_ACOX1_DN	0.0017331	0.02584	0.692545	2.08898	0	24
LEE_EARLY_T_LYMPHOCYTE_UP	0.0015748	0.02584	0.538521	2.08879	0	94
GSE27434_WT_VS_DNMT1_KO_TREG_DN	0.00147493	0.02584	0.50614	2.08351	0	143
KAUFFMANN_DNA_REPLICATION_GENES	0.00148148	0.02584	0.508934	2.08264	0	130
GSE42021_CD24HI_TREG_VS_CD24HI_TCONV_THYMUS_DN	0.00149477	0.02584	0.508788	2.08256	0	132
BMI1_DN_MEL18_DN.V1_UP	0.00165017	0.02584	0.576003	2.08174	0	62
GSE13306_RA_VS_UNTREATED_MEM_CD4_TCELL_DN	0.00148148	0.02584	0.50798	2.07873	0	130
V$E2F_Q3	0.00142653	0.02584	0.489342	2.07848	0	172
V$E2F_Q6_01	0.00142248	0.02584	0.487025	2.07743	0	182
GSE14386_UNTREATED_VS_IFNA_TREATED_ACT_PBMC_MS_PATIENT_DN	0.00155521	0.02584	0.521162	2.07673	0	109
GO_REGULATION_OF_DNA_DEPENDENT_DNA_REPLICATION	0.00174825	0.02584	0.643107	2.07592	0	35
V$CREB_Q4	0.00142248	0.02584	0.486415	2.07483	0	182
GSE16451_CTRL_VS_WEST_EQUINE_ENC_VIRUS_IMMATURE_NEURON_CELL_LINE_DN	0.00142857	0.02584	0.489783	2.07463	0	170
REACTOME_E2F_MEDIATED_REGULATION_OF_DNA_REPLICATION	0.00174216	0.02584	0.651351	2.07384	0	33
GSE18804_SPLEEN_MACROPHAGE_VS_BRAIN_TUMORAL_MACROPHAGE_UP	0.00157729	0.02584	0.524886	2.07218	0	105
KEGG_P53_SIGNALING_PATHWAY	0.00168067	0.02584	0.592281	2.07132	0	52
HOFFMANN_LARGE_TO_SMALL_PRE_BII_LYMPHOCYTE_UP	0.00143885	0.02584	0.497302	2.06862	0	149
KOKKINAKIS_METHIONINE_DEPRIVATION_96HR_DN	0.00162866	0.02584	0.569241	2.06803	0	63
AFFAR_YY1_TARGETS_DN	0.00146628	0.02584	0.501736	2.06758	0	141
REACTOME_GLOBAL_GENOMIC_NER_GG_NER	0.00174216	0.02584	0.649196	2.06698	0	33
GSE24671_CTRL_VS_BAKIMULC_INFECTED_MOUSE_SPLENOCYTES_DN	0.00162338	0.02584	0.535165	2.06604	0	96
AMIT_SERUM_RESPONSE_120_MCF10A	0.00168634	0.02584	0.606922	2.06531	0	44
HAMAI_APOPTOSIS_VIA_TRAIL_UP	0.00121803	0.02584	0.438569	2.06508	0	471
GO_RESPONSE_TO_INTERLEUKIN_1	0.00168067	0.02584	0.589535	2.06171	0	52
GO_REGULATION_OF_EXTRINSIC_APOPTOTIC_SIGNALING_PATHWAY_VIA_DEATH_DOMAIN_RECEPTORS	0.00174825	0.02584	0.638473	2.06097	0	35
OSADA_ASCL1_TARGETS_UP	0.0017762	0.0261372	0.704278	2.06014	0	21
REACTOME_MITOTIC_M_M_G1_PHASES	0.00143678	0.02584	0.491806	2.06013	0	157
PID_NFKAPPAB_CANONICAL_PATHWAY	0.00178571	0.0261512	0.71704	2.05949	0	20
GSE36476_CTRL_VS_TSST_ACT_40H_MEMORY_CD4_TCELL_YOUNG_DN	0.00142045	0.02584	0.483562	2.05925	0	176
V$E2F_03	0.00140252	0.02584	0.477404	2.05711	0	193
GO_REGULATION_OF_DNA_RECOMBINATION	0.00171233	0.02584	0.617953	2.0551	0	40
SCIAN_INVERSED_TARGETS_OF_TP53_AND_TP73_DN	0.00169492	0.02584	0.664753	2.05414	0	27
V$E2F_Q3_01	0.00143266	0.02584	0.48081	2.05381	0	187
CAFFAREL_RESPONSE_TO_THC_24HR_5_DN	0.00168067	0.02584	0.591309	2.05171	0	49
PUJANA_BRCA2_PCC_NETWORK	0.00125628	0.02584	0.44371	2.05059	0	388
GO_GRANULOCYTE_MIGRATION	0.0017762	0.0261372	0.70049	2.04906	0	21
GSE24634_TEFF_VS_TCONV_DAY7_IN_CULTURE_UP	0.00142248	0.02584	0.483458	2.04906	0	169
GSE22935_UNSTIM_VS_24H_MBOVIS_BCG_STIM_MYD88_KO_MACROPHAGE_UP	0.00143678	0.02584	0.488354	2.04806	0	158
GSE42021_TCONV_PLN_VS_TREG_PRECURSORS_THYMUS_DN	0.00143885	0.02584	0.492037	2.04671	0	149
GSE1432_CTRL_VS_IFNG_1H_MICROGLIA_DN	0.0014881	0.02584	0.502892	2.04662	0	124
GSE18791_CTRL_VS_NEWCASTLE_VIRUS_DC_1H_DN	0.00160514	0.02584	0.532735	2.04546	0	90
BIOCARTA_TNFR2_PATHWAY	0.00182815	0.0261512	0.758282	2.04512	0	16
MORI_IMMATURE_B_LYMPHOCYTE_DN	0.00161551	0.02584	0.535575	2.04415	0	87
V$E2F1_Q4_01	0.00143472	0.02584	0.479282	2.04297	0	183
MARSHALL_VIRAL_INFECTION_RESPONSE_DN	0.00173913	0.02584	0.681501	2.04272	0	23
NABA_SECRETED_FACTORS	0.00165289	0.02584	0.57126	2.04162	0	57
GSE17974_IL4_AND_ANTI_IL12_VS_UNTREATED_12H_ACT_CD4_TCELL_DN	0.00162602	0.02584	0.551529	2.03994	0	71
GSE14415_INDUCED_VS_NATURAL_TREG_UP	0.00153374	0.02584	0.505374	2.03929	0	114
SIG_CD40PATHWAYMAP	0.00170068	0.02584	0.654353	2.03868	0	28
V$E2F_Q4_01	0.00142857	0.02584	0.477063	2.03647	0	188
GSE369_PRE_VS_POST_IL6_INJECTION_SOCS3_KO_LIVER_UP	0.00143678	0.02584	0.48538	2.03559	0	158
ZHANG_ANTIVIRAL_RESPONSE_TO_RIBAVIRIN_DN	0.00170068	0.02584	0.653335	2.03551	0	28
HOXA9_DN.V1_DN	0.00146843	0.02584	0.494081	2.03481	0	142
HALLMARK_UV_RESPONSE_UP	0.00150602	0.02584	0.502313	2.03296	0	118
GSE9988_ANTI_TREM1_VS_VEHICLE_TREATED_MONOCYTES_UP	0.0014771	0.02584	0.497478	2.03289	0	128
GO_CHROMOSOME_SEGREGATION	0.00138696	0.02584	0.461645	2.03245	0	227
ZHENG_GLIOBLASTOMA_PLASTICITY_UP	0.00145138	0.02584	0.488534	2.0253	0	147
GSE3982_CENT_MEMORY_CD4_TCELL_VS_TH1_DN	0.0014245	0.02584	0.475833	2.02434	0	175
HALLMARK_P53_PATHWAY	0.001443	0.02584	0.486228	2.02427	0	150
GSE45365_CD8A_DC_VS_CD11B_DC_IFNAR_KO_MCMV_INFECTION_DN	0.00165563	0.02584	0.55457	2.02388	0	66
GSE27786_LIN_NEG_VS_ERYTHROBLAST_DN	0.00160514	0.02584	0.527	2.02344	0	90
GSE29617_CTRL_VS_TIV_FLU_VACCINE_PBMC_2008_UP	0.00147929	0.02584	0.495856	2.02253	0	127
ERB2_UP.V1_DN	0.00146628	0.02584	0.489222	2.0225	0	145
GSE3982_NKCELL_VS_TH1_DN	0.00142857	0.02584	0.477305	2.02177	0	170
V$NFKB_Q6_01	0.00148588	0.02584	0.492621	2.02171	0	134
WATTEL_AUTONOMOUS_THYROID_ADENOMA_DN	0.00173913	0.02584	0.674399	2.02143	0	23
GSE3982_NKCELL_VS_TH2_DN	0.00143678	0.02584	0.480743	2.02097	0	163
REACTOME_MITOTIC_G1_G1_S_PHASES	0.00148148	0.02584	0.495479	2.02003	0	126
GO_SISTER_CHROMATID_SEGREGATION	0.00142857	0.02584	0.481314	2.01813	0	156
GSE20500_RETINOIC_ACID_VS_RARA_ANTAGONIST_TREATED_CD4_TCELL_DN	0.00149477	0.02584	0.492474	2.01707	0	133
GSE14415_TCONV_VS_FOXP3_KO_INDUCED_TREG_DN	0.00142857	0.02584	0.475934	2.01597	0	170
HUANG_FOXA2_TARGETS_UP	0.0017301	0.02584	0.635336	2.01472	0	32
GNF2_MCM5	0.00164204	0.02584	0.55949	2.01358	0	60
GSE17301_ACD3_ACD28_VS_ACD3_ACD28_AND_IFNA5_STIM_CD8_TCELL_UP	0.00144092	0.02584	0.48471	2.01229	0	148
GSE3982_BCELL_VS_TH1_DN	0.00147929	0.02584	0.493088	2.01124	0	127
GSE36891_POLYIC_TLR3_VS_PAM_TLR2_STIM_PERITONEAL_MACROPHAGE_UP	0.00160514	0.02584	0.530297	2.00854	0	82
GNF2_HMMR	0.00163934	0.02584	0.579288	2.00731	0	47
GSE18281_SUBCAPSULAR_VS_PERIMEDULLARY_CORTICAL_REGION_OF_THYMUS_DN	0.00155521	0.02584	0.503737	2.0073	0	109
REACTOME_PROCESSIVE_SYNTHESIS_ON_THE_LAGGING_STRAND	0.00182482	0.0261512	0.754261	2.00667	0	15
GSE2128_CTRL_VS_MIMETOPE_NEGATIVE_SELECTION_DP_THYMOCYTE_C57BL6_UP	0.00160256	0.02584	0.516312	2.0046	0	98
GSE13547_2H_VS_12_H_ANTI_IGM_STIM_BCELL_DN	0.00143678	0.02584	0.477458	2.0045	0	160
GSE13547_2H_VS_12_H_ANTI_IGM_STIM_ZFX_KO_BCELL_DN	0.00147275	0.02584	0.488414	2.00441	0	136
GO_SISTER_CHROMATID_COHESION	0.00161031	0.02584	0.517398	2.00401	0	97
GSE32164_RESTING_DIFFERENTIATED_VS_ALTERNATIVELY_ACT_M2_MACROPHAGE_UP	0.00146199	0.02584	0.484989	2.00023	0	139
VILIMAS_NOTCH1_TARGETS_UP	0.00170068	0.02584	0.641524	1.99871	0	28
KEGG_CYTOSOLIC_DNA_SENSING_PATHWAY	0.0034662	0.0301314	0.614169	1.99761	1	36
SMITH_TERT_TARGETS_UP	0.0014881	0.02584	0.491181	1.99622	0	125
GSE27241_WT_VS_RORGT_KO_TH17_POLARIZED_CD4_TCELL_UP	0.0014881	0.02584	0.490409	1.99582	0	124
GSE21063_CTRL_VS_ANTI_IGM_STIM_BCELL_8H_UP	0.00162866	0.02584	0.5208	1.99559	0	92
CHEMNITZ_RESPONSE_TO_PROSTAGLANDIN_E2_UP	0.00149701	0.02584	0.490494	1.9915	0	122
PUJANA_BRCA_CENTERED_NETWORK	0.00151286	0.02584	0.491235	1.99045	0	115
V$ATF3_Q6	0.00145138	0.02584	0.480052	1.99014	0	147
GSE37416_CTRL_VS_24H_F_TULARENSIS_LVS_NEUTROPHIL_DN	0.00142857	0.02584	0.469771	1.98986	0	170
PYEON_HPV_POSITIVE_TUMORS_UP	0.00159744	0.02584	0.532806	1.98799	0	73
PRC2_EZH2_UP.V1_UP	0.00149701	0.02584	0.490751	1.98745	0	113
GSE7460_FOXP3_MUT_VS_WT_ACT_WITH_TGFB_TCONV_UP	0.00147929	0.02584	0.484445	1.98733	0	135
GO_CONDENSED_CHROMOSOME_CENTROMERIC_REGION	0.00161551	0.02584	0.52405	1.98725	0	83
GSE16755_CTRL_VS_IFNA_TREATED_MAC_DN	0.00148148	0.02584	0.485333	1.98606	0	130
GSE14415_INDUCED_VS_NATURAL_TREG_DN	0.00143885	0.02584	0.477181	1.98492	0	149
SHETH_LIVER_CANCER_VS_TXNIP_LOSS_PAM2	0.00161031	0.02584	0.512143	1.98366	0	97
GSE4984_GALECTIN1_VS_VEHICLE_CTRL_TREATED_DC_DN	0.00142653	0.02584	0.471535	1.98167	0	159
ADDYA_ERYTHROID_DIFFERENTIATION_BY_HEMIN	0.00167224	0.02584	0.558227	1.98019	0	55
GO_NUCLEAR_REPLICATION_FORK	0.00173611	0.02584	0.60575	1.98019	0	37
MARKEY_RB1_CHRONIC_LOF_UP	0.00158983	0.02584	0.523752	1.97998	0	80
GSE17721_PAM3CSK4_VS_CPG_1H_BMDC_DN	0.0014771	0.02584	0.480823	1.97903	0	138
GSE17721_LPS_VS_PAM3CSK4_1H_BMDC_DN	0.00149477	0.02584	0.483085	1.97862	0	133
REACTOME_G1_S_TRANSITION	0.00157729	0.02584	0.500788	1.97704	0	105
GSE43863_TFH_VS_LY6C_INT_CXCR5POS_EFFECTOR_CD4_TCELL_DN	0.00155039	0.02584	0.496369	1.97627	0	108
VECCHI_GASTRIC_CANCER_EARLY_UP	0.00132275	0.02584	0.436958	1.97611	0	307
BIOCARTA_MCM_PATHWAY	0.00184843	0.0262162	0.718557	1.97556	0	17
GSE7852_LN_VS_THYMUS_TCONV_DN	0.00143885	0.02584	0.470331	1.97523	0	162
GSE6092_CTRL_VS_BORRELIA_BIRGDOFERI_INF_ENDOTHELIAL_CELL_DN	0.0015748	0.02584	0.509222	1.97515	0	94
VANTVEER_BREAST_CANCER_METASTASIS_DN	0.00160772	0.02584	0.512333	1.97476	0	93
CHEN_ETV5_TARGETS_TESTIS	0.00184843	0.0262162	0.71821	1.97461	0	17
GSE23925_LIGHT_ZONE_VS_NAIVE_BCELL_UP	0.00147929	0.02584	0.481318	1.97451	0	135
GO_CHROMOSOME_CONDENSATION	0.00174216	0.02584	0.664519	1.97366	0	22
GARGALOVIC_RESPONSE_TO_OXIDIZED_PHOSPHOLIPIDS_MAGENTA_UP	0.00173913	0.02584	0.658393	1.97346	0	23
LINDGREN_BLADDER_CANCER_CLUSTER_1_DN	0.00134228	0.02584	0.439877	1.97329	0	272
GO_DNA_RECOMBINATION	0.00142248	0.02584	0.463907	1.97325	0	173
LEE_LIVER_CANCER_MYC_E2F1_DN	0.00173913	0.02584	0.657838	1.97179	0	23
GSE19401_NAIVE_VS_IMMUNIZED_MOUSE_PLN_FOLLICULAR_DC_UP	0.00145138	0.02584	0.47551	1.97131	0	147
REACTOME_HOMOLOGOUS_RECOMBINATION_REPAIR_OF_REPLICATION_INDEPENDENT_DOUBLE_STRAND_BREAKS	0.00182815	0.0261512	0.730833	1.97109	0	16
GSE3982_BCELL_VS_TH2_DN	0.00149925	0.02584	0.484677	1.96892	0	123
KRIEG_HYPOXIA_VIA_KDM3A	0.00172414	0.02584	0.626821	1.96863	0	30
V$CREB_Q2_01	0.00144509	0.02584	0.471774	1.96824	0	154
GO_POSITIVE_REGULATION_OF_INFLAMMATORY_RESPONSE	0.00344234	0.0301314	0.610267	1.96769	1	34
V$CREB_Q4_01	0.00146843	0.02584	0.477709	1.96739	0	142
GO_NUCLEAR_CHROMOSOME_SEGREGATION	0.00142857	0.02584	0.460358	1.96666	0	185
KANNAN_TP53_TARGETS_UP	0.00342466	0.0301314	0.591118	1.96586	1	40
TANG_SENESCENCE_TP53_TARGETS_DN	0.00168067	0.02584	0.566234	1.96471	0	49
REACTOME_G0_AND_EARLY_G1	0.00173913	0.02584	0.655397	1.96448	0	23
GO_INTRINSIC_APOPTOTIC_SIGNALING_PATHWAY	0.00149701	0.02584	0.483728	1.96403	0	122
ONDER_CDH1_SIGNALING_VIA_CTNNB1	0.00344234	0.0301314	0.609071	1.96383	1	34
KEGG_NUCLEOTIDE_EXCISION_REPAIR	0.00338409	0.0301314	0.576554	1.96106	1	43
GO_NEGATIVE_REGULATION_OF_MUSCLE_CELL_DIFFERENTIATION	0.0017301	0.02584	0.635462	1.9603	0	26
GSE17721_CTRL_VS_LPS_1H_BMDC_DN	0.00157729	0.02584	0.496186	1.95887	0	105
GSE41176_WT_VS_TAK1_KO_ANTI_IGM_STIM_BCELL_6H_UP	0.00149477	0.02584	0.478376	1.95807	0	132
GSE27241_CTRL_VS_DIGOXIN_TREATED_CD4_TCELL_IN_TH17_POLARIZING_CONDITIONS_UP	0.00153374	0.02584	0.485051	1.95729	0	114
GSE2405_0H_VS_24H_A_PHAGOCYTOPHILUM_STIM_NEUTROPHIL_DN	0.00152672	0.02584	0.488801	1.95727	0	110
VANTVEER_BREAST_CANCER_POOR_PROGNOSIS	0.0017301	0.02584	0.617079	1.95682	0	32
GSE411_WT_VS_SOCS3_KO_MACROPHAGE_IL6_STIM_400MIN_UP	0.00148588	0.02584	0.476798	1.95677	0	134
GSE21063_CTRL_VS_ANTI_IGM_STIM_BCELL_16H_UP	0.00145985	0.02584	0.47335	1.95518	0	144
GSE23505_IL6_IL1_IL23_VS_IL6_IL1_TGFB_TREATED_CD4_TCELL_DN	0.001443	0.02584	0.468707	1.95422	0	152
MANALO_HYPOXIA_DN	0.00133333	0.02584	0.435109	1.95188	0	265
GO_REPLISOME	0.00169492	0.02584	0.631231	1.95056	0	27
HELLER_HDAC_TARGETS_SILENCED_BY_METHYLATION_DN	0.00138889	0.02584	0.444042	1.94983	0	224
GAVIN_FOXP3_TARGETS_CLUSTER_P6	0.00159236	0.02584	0.520265	1.94882	0	74
GSE7460_TREG_VS_TCONV_ACT_UP	0.00147929	0.02584	0.477783	1.94882	0	127
GSE37605_TREG_VS_TCONV_NOD_FOXP3_FUSION_GFP_UP	0.00159236	0.02584	0.520143	1.94836	0	74
GAL_LEUKEMIC_STEM_CELL_DN	0.00150376	0.02584	0.478222	1.94674	0	129
TOOKER_GEMCITABINE_RESISTANCE_DN	0.0015949	0.02584	0.495979	1.94556	0	103
GSE2405_0H_VS_12H_A_PHAGOCYTOPHILUM_STIM_NEUTROPHIL_DN	0.00146843	0.02584	0.47227	1.94498	0	142
KEGG_HOMOLOGOUS_RECOMBINATION	0.00169492	0.02584	0.629103	1.94398	0	27
GSE14000_UNSTIM_VS_16H_LPS_DC_DN	0.00142857	0.02584	0.46352	1.94352	0	156
GSE3337_4H_VS_16H_IFNG_IN_CD8POS_DC_UP	0.00142248	0.02584	0.459241	1.94325	0	168
STK33_NOMO_UP	0.00143472	0.02584	0.45848	1.94184	0	171
GSE13547_2H_VS_12_H_ANTI_IGM_STIM_BCELL_UP	0.00148148	0.02584	0.4745	1.94173	0	130
GO_POSITIVE_REGULATION_OF_RESPONSE_TO_WOUNDING	0.00166667	0.02584	0.543519	1.94016	0	58
GSE44649_NAIVE_VS_ACTIVATED_CD8_TCELL_MIR155_KO_UP	0.00142248	0.02584	0.458378	1.9396	0	168
GO_NEGATIVE_REGULATION_OF_FATTY_ACID_METABOLIC_PROCESS	0.00182482	0.0261512	0.7289	1.9392	0	15
GSE17974_0H_VS_0.5H_IN_VITRO_ACT_CD4_TCELL_DN	0.00151286	0.02584	0.479139	1.93918	0	117
GSE2770_IL4_ACT_VS_ACT_CD4_TCELL_2H_DN	0.00142248	0.02584	0.458499	1.93916	0	166
GSE17721_PAM3CSK4_VS_GADIQUIMOD_1H_BMDC_UP	0.00158228	0.02584	0.494751	1.93851	0	101
REACTOME_EXTENSION_OF_TELOMERES	0.00169492	0.02584	0.627215	1.93815	0	27
HALLMARK_G2M_CHECKPOINT	0.00142248	0.02584	0.452584	1.93773	0	190
GSE10239_NAIVE_VS_KLRG1HIGH_EFF_CD8_TCELL_DN	0.00143678	0.02584	0.461405	1.9375	0	161
GO_REGULATION_OF_ENDOPLASMIC_RETICULUM_STRESS_INDUCED_INTRINSIC_APOPTOTIC_SIGNALING_PATHWAY	0.0017331	0.02584	0.642296	1.93741	0	24
GSE39110_DAY3_VS_DAY6_POST_IMMUNIZATION_CD8_TCELL_WITH_IL2_TREATMENT_UP	0.00142857	0.02584	0.46205	1.93736	0	156
WANG_ESOPHAGUS_CANCER_VS_NORMAL_UP	0.00162602	0.02584	0.530521	1.93725	0	65
GSE5679_CTRL_VS_PPARG_LIGAND_ROSIGLITAZONE_TREATED_DC_UP	0.00141044	0.02584	0.453809	1.93714	0	180
MODULE_76	0.0017301	0.02584	0.610431	1.93574	0	32
RB_DN.V1_UP	0.00160772	0.02584	0.498453	1.93485	0	99
GGGNNTTTCC_V$NFKB_Q6_01	0.00160256	0.02584	0.514726	1.9346	0	77
ZHAN_V2_LATE_DIFFERENTIATION_GENES	0.003367	0.0301314	0.574637	1.93439	1	42
MODULE_372	0.00181488	0.0261512	0.681901	1.93417	0	19
GSE39110_UNTREATED_VS_IL2_TREATED_CD8_TCELL_DAY3_POST_IMMUNIZATION_DN	0.00144509	0.02584	0.463334	1.93303	0	154
PRAMOONJAGO_SOX4_TARGETS_UP	0.00344234	0.0301314	0.585526	1.93292	1	39
GSE17721_CTRL_VS_LPS_2H_BMDC_DN	0.0014881	0.02584	0.474779	1.93221	0	124
KRAS.BREAST_UP.V1_UP	0.00170068	0.02584	0.619737	1.93083	0	28
V$CREB_01	0.0014245	0.02584	0.453675	1.93008	0	175
GSE36888_UNTREATED_VS_IL2_TREATED_STAT5_AB_KNOCKIN_TCELL_2H_UP	0.00152672	0.02584	0.48176	1.92907	0	110
KOKKINAKIS_METHIONINE_DEPRIVATION_48HR_UP	0.00162866	0.02584	0.503386	1.92886	0	92
GSE2770_TGFB_AND_IL4_VS_IL12_TREATED_ACT_CD4_TCELL_2H_DN	0.00149477	0.02584	0.470926	1.92758	0	132
PUJANA_BREAST_CANCER_WITH_BRCA1_MUTATED_UP	0.0016835	0.02584	0.54727	1.92757	0	54
STK33_SKM_UP	0.00142248	0.02584	0.450074	1.92698	0	190
GSE29615_CTRL_VS_DAY3_LAIV_IFLU_VACCINE_PBMC_UP	0.00148148	0.02584	0.472549	1.92654	0	126
GSE27786_NEUTROPHIL_VS_MONO_MAC_DN	0.00142653	0.02584	0.458417	1.92654	0	159
GSE35543_IN_VITRO_ITREG_VS_CONVERTED_EX_ITREG_UP	0.00144092	0.02584	0.461693	1.92623	0	153
V$CREB_Q2	0.0014245	0.02584	0.451811	1.92474	0	177
CUI_GLUCOSE_DEPRIVATION	0.00328947	0.0301314	0.554545	1.92471	1	48
GSE15330_HSC_VS_LYMPHOID_PRIMED_MULTIPOTENT_PROGENITOR_DN	0.0014771	0.02584	0.467571	1.92449	0	138
WANG_HCP_PROSTATE_CANCER	0.00160514	0.02584	0.511385	1.92387	0	78
REACTOME_TRANSCRIPTION_COUPLED_NER_TC_NER	0.00338409	0.0301314	0.565339	1.92291	1	43
GO_REGULATION_OF_FAT_CELL_DIFFERENTIATION	0.003367	0.0301314	0.563316	1.92284	1	46
PENG_LEUCINE_DEPRIVATION_UP	0.00150602	0.02584	0.4771	1.92259	0	112
SLEBOS_HEAD_AND_NECK_CANCER_WITH_HPV_UP	0.00165017	0.02584	0.531884	1.92229	0	62
GO_REGULATION_OF_DOUBLE_STRAND_BREAK_REPAIR	0.00170068	0.02584	0.61243	1.92138	0	29
GSE45382_UNTREATED_VS_TGFB_TREATED_MACROPHAGES_DN	0.0014881	0.02584	0.472643	1.92088	0	125
GO_CHROMOSOME_CENTROMERIC_REGION	0.001443	0.02584	0.461378	1.92082	0	150
GSE21670_STAT3_KO_VS_WT_CD4_TCELL_TGFB_TREATED_DN	0.00161031	0.02584	0.495745	1.92014	0	97
GSE32986_UNSTIM_VS_GMCSF_AND_CURDLAN_HIGHDOSE_STIM_DC_UP	0.00143472	0.02584	0.453281	1.91982	0	171
CHIANG_LIVER_CANCER_SUBCLASS_PROLIFERATION_UP	0.00146843	0.02584	0.466115	1.91964	0	142
GSE45365_NK_CELL_VS_CD8_TCELL_MCMV_INFECTION_DN	0.00146199	0.02584	0.465092	1.91817	0	139
GSE24634_TREG_VS_TCONV_POST_DAY10_IL4_CONVERSION_UP	0.00142653	0.02584	0.451464	1.91759	0	172
V$E2F1_Q6_01	0.00141443	0.02584	0.444712	1.91741	0	194
GO_POSITIVE_REGULATION_OF_NEURON_APOPTOTIC_PROCESS	0.00344234	0.0301314	0.594579	1.9171	1	34
GO_NEUTRAL_AMINO_ACID_TRANSPORT	0.00184843	0.0262162	0.697261	1.91701	0	17
GSE20727_DNFB_ALLERGEN_VS_ROS_INH_AND_DNFB_ALLERGEN_TREATED_DC_DN	0.001443	0.02584	0.460434	1.91689	0	150
GSE22886_NAIVE_CD4_TCELL_VS_48H_ACT_TH1_DN	0.0014245	0.02584	0.448978	1.91683	0	184
REACTOME_DNA_REPAIR	0.00158228	0.02584	0.488934	1.91572	0	101
GSE19941_UNSTIM_VS_LPS_AND_IL10_STIM_IL10_KO_MACROPHAGE_DN	0.00142857	0.02584	0.456858	1.91559	0	156
DUTERTRE_ESTRADIOL_RESPONSE_6HR_UP	0.00142248	0.02584	0.45292	1.91556	0	166
GROSS_HYPOXIA_VIA_ELK3_ONLY_UP	0.00174216	0.02584	0.644881	1.91534	0	22
REACTOME_CELL_CYCLE	0.00130208	0.02584	0.418033	1.91467	0	368
GSE11864_CSF1_PAM3CYS_VS_CSF1_IFNG_PAM3CYS_IN_MAC_DN	0.0014881	0.02584	0.471092	1.91457	0	125
ZHOU_INFLAMMATORY_RESPONSE_LPS_UP	0.00142248	0.02584	0.451646	1.91423	0	169
KAMMINGA_EZH2_TARGETS	0.003367	0.0301314	0.56983	1.91344	1	41
GSE22886_UNSTIM_VS_IL15_STIM_NKCELL_DN	0.00143266	0.02584	0.4478	1.9128	0	187
chr5q11	0.00174216	0.02584	0.644018	1.91278	0	22
GO_CENTRIOLE_ASSEMBLY	0.00184843	0.0262162	0.695555	1.91232	0	17
WIERENGA_STAT5A_TARGETS_GROUP2	0.00347222	0.0301314	0.582021	1.91154	1	38
JECHLINGER_EPITHELIAL_TO_MESENCHYMAL_TRANSITION_DN	0.00342466	0.0301314	0.574663	1.91114	1	40
PLASARI_TGFB1_TARGETS_1HR_UP	0.00184843	0.0262162	0.694957	1.91068	0	17
REACTOME_ACTIVATION_OF_GENES_BY_ATF4	0.0017762	0.0261372	0.653169	1.91064	0	21
GO_CELL_CYCLE_PHASE_TRANSITION	0.00137931	0.02584	0.433292	1.91055	0	230
GO_CONDENSED_CHROMOSOME	0.00144509	0.02584	0.457816	1.91001	0	154
GSE25846_IL10_POS_VS_NEG_CD8_TCELL_DAY7_POST_CORONAVIRUS_BRAIN_UP	0.00160772	0.02584	0.491554	1.90807	0	99
JAEGER_METASTASIS_UP	0.00169492	0.02584	0.616953	1.90644	0	27
IVANOVSKA_MIR106B_TARGETS	0.00159744	0.02584	0.510936	1.90639	0	73
RHODES_UNDIFFERENTIATED_CANCER	0.00162602	0.02584	0.521975	1.90605	0	65
HALLMARK_INFLAMMATORY_RESPONSE	0.0015748	0.02584	0.491366	1.90589	0	94
GO_CELLULAR_RESPONSE_TO_EXTERNAL_STIMULUS	0.001443	0.02584	0.45332	1.90586	0	164
GO_REGULATION_OF_DNA_TEMPLATED_TRANSCRIPTION_IN_RESPONSE_TO_STRESS	0.003367	0.0301314	0.541042	1.90563	1	54
GSE37301_HEMATOPOIETIC_STEM_CELL_VS_RAG2_KO_NK_CELL_DN	0.0014881	0.02584	0.468202	1.90545	0	124
GSE17721_0.5H_VS_4H_CPG_BMDC_DN	0.00147929	0.02584	0.463026	1.90544	0	140
GO_TRANSCRIPTIONAL_ACTIVATOR_ACTIVITY_RNA_POLYMERASE_II_TRANSCRIPTION_REGULATORY_REGION_SEQUENCE_SPECIFIC_BINDING	0.00142653	0.02584	0.453376	1.90535	0	159
GSE3982_MEMORY_CD4_TCELL_VS_TH2_DN	0.00143472	0.02584	0.449769	1.90495	0	171
GSE36888_UNTREATED_VS_IL2_TREATED_TCELL_17H_DN	0.0014881	0.02584	0.468558	1.90428	0	125
GSE22601_DOUBLE_POSITIVE_VS_CD4_SINGLE_POSITIVE_THYMOCYTE_DN	0.00142045	0.02584	0.447109	1.90402	0	176
GNF2_CDC20	0.00334448	0.0301314	0.536568	1.90336	1	55
GSE17186_CD21LOW_VS_CD21HIGH_TRANSITIONAL_BCELL_DN	0.00143472	0.02584	0.456046	1.9031	0	151
chr18q11	0.00181488	0.0261512	0.670736	1.90251	0	19
GSE21360_PRIMARY_VS_TERTIARY_MEMORY_CD8_TCELL_DN	0.00146628	0.02584	0.460081	1.90203	0	145
GSE5589_LPS_VS_LPS_AND_IL10_STIM_IL10_KO_MACROPHAGE_45MIN_DN	0.00149925	0.02584	0.467991	1.90114	0	123
LI_WILMS_TUMOR_ANAPLASTIC_UP	0.00181488	0.0261512	0.670077	1.90064	0	19
GSE12845_IGD_POS_BLOOD_VS_PRE_GC_TONSIL_BCELL_DN	0.0014245	0.02584	0.445176	1.9006	0	184
HALLMARK_MTORC1_SIGNALING	0.00142248	0.02584	0.443869	1.90041	0	190
GSE1432_1H_VS_6H_IFNG_MICROGLIA_DN	0.00143678	0.02584	0.453114	1.90027	0	158
GSE17974_CTRL_VS_ACT_IL4_AND_ANTI_IL12_1H_CD4_TCELL_DN	0.0014556	0.02584	0.458836	1.89958	0	146
BURTON_ADIPOGENESIS_PEAK_AT_2HR	0.00172414	0.02584	0.604802	1.89947	0	30
GSE16385_ROSIGLITAZONE_IFNG_TNF_VS_IL4_STIM_MACROPHAGE_UP	0.00149701	0.02584	0.467698	1.89894	0	122
WARTERS_RESPONSE_TO_IR_SKIN	0.00328947	0.0301314	0.547008	1.89855	1	48
REACTOME_M_G1_TRANSITION	0.00158983	0.02584	0.505385	1.89835	0	76
GSE36476_CTRL_VS_TSST_ACT_72H_MEMORY_CD4_TCELL_OLD_DN	0.0014245	0.02584	0.44414	1.89617	0	184
GO_RESPONSE_TO_X_RAY	0.0017331	0.02584	0.628388	1.89546	0	24
V$ATF_B	0.00151286	0.02584	0.468214	1.89497	0	117
GSE12963_ENV_NEF_VS_ENV_NEF_AND_VPR_DEFICIENT_HIV1_INF_CD4_TCELL_DN	0.00158983	0.02584	0.501185	1.89467	0	80
GSE12507_PDC_CELL_LINE_VS_IMMATUE_T_CELL_LINE_UP	0.00151745	0.02584	0.471531	1.89435	0	111
TBK1.DF_UP	0.00139276	0.02584	0.435717	1.89271	0	206
ST_GA13_PATHWAY	0.0017301	0.02584	0.613401	1.89225	0	26
GNF2_CENPE	0.00342466	0.0301314	0.568811	1.89167	1	40
LE_EGR2_TARGETS_UP	0.0015949	0.02584	0.492611	1.89167	0	89
GSE10463_CD40L_AND_VA347_VS_CD40L_IN_DC_UP	0.0014881	0.02584	0.464729	1.89131	0	124
GSE19888_CTRL_VS_A3R_INHIBITOR_TREATED_MAST_CELL_UP	0.0014245	0.02584	0.444692	1.89075	0	174
GSE9509_LPS_VS_LPS_AND_IL10_STIM_IL10_KO_MACROPHAGE_20MIN_DN	0.00141443	0.02584	0.44607	1.88998	0	165
GSE37534_PIOGLITAZONE_VS_ROSIGLITAZONE_TREATED_CD4_TCELL_PPARG1_FOXP3_TRANSDUCED_DN	0.00160256	0.02584	0.486788	1.88997	0	98
GNF2_RFC3	0.00342466	0.0301314	0.568136	1.88943	1	40
GSE32164_ALTERNATIVELY_ACT_M2_VS_CMYC_INHIBITED_MACROPHAGE_DN	0.00142248	0.02584	0.44652	1.88942	0	168
GRAHAM_CML_QUIESCENT_VS_NORMAL_DIVIDING_UP	0.0017331	0.02584	0.626226	1.88894	0	24
CHIARADONNA_NEOPLASTIC_TRANSFORMATION_KRAS_UP	0.00160772	0.02584	0.489978	1.8886	0	93
GSE24671_BAKIMULC_VS_SENDAI_VIRUS_INFECTED_MOUSE_SPLENOCYTES_UP	0.00143678	0.02584	0.450227	1.88816	0	158
GO_TRANSCRIPTION_COREPRESSOR_ACTIVITY	0.00144092	0.02584	0.451482	1.88814	0	155
GSE37532_WT_VS_PPARG_KO_VISCERAL_ADIPOSE_TISSUE_TREG_UP	0.00142857	0.02584	0.441437	1.88583	0	185
GSE8921_UNSTIM_0H_VS_TLR1_2_STIM_MONOCYTE_12H_UP	0.00143678	0.02584	0.448465	1.88528	0	163
ESC_V6.5_UP_LATE.V1_DN	0.00158228	0.02584	0.480936	1.88438	0	101
GNF2_BUB1B	0.00336134	0.0301314	0.542934	1.88386	1	49
BASSO_CD40_SIGNALING_UP	0.00159744	0.02584	0.498092	1.88363	0	81
TERAMOTO_OPN_TARGETS_CLUSTER_7	0.00182815	0.0261512	0.698301	1.88335	0	16
ODONNELL_TFRC_TARGETS_DN	0.0015949	0.02584	0.480105	1.88329	0	103
REACTOME_MITOTIC_PROMETAPHASE	0.00160256	0.02584	0.501005	1.88303	0	77
GSE34205_HEALTHY_VS_RSV_INF_INFANT_PBMC_DN	0.00149701	0.02584	0.464603	1.88156	0	113
KTGGYRSGAA_UNKNOWN	0.00165017	0.02584	0.52015	1.87988	0	62
CAFFAREL_RESPONSE_TO_THC_UP	0.00172414	0.02584	0.598486	1.87964	0	30
BIOCARTA_DEATH_PATHWAY	0.00172414	0.02584	0.598477	1.87961	0	30
GSE2706_R848_VS_R848_AND_LPS_8H_STIM_DC_DN	0.00157729	0.02584	0.474985	1.8796	0	106
POOLA_INVASIVE_BREAST_CANCER_UP	0.00142248	0.02584	0.444391	1.87949	0	166
GSE37416_0H_VS_48H_F_TULARENSIS_LVS_NEUTROPHIL_DN	0.00143472	0.02584	0.450134	1.87843	0	151
GSE18791_CTRL_VS_NEWCASTLE_VIRUS_DC_16H_DN	0.00149254	0.02584	0.463323	1.87739	0	120
THEILGAARD_NEUTROPHIL_AT_SKIN_WOUND_UP	0.00165017	0.02584	0.523571	1.87661	0	59
DAZARD_UV_RESPONSE_CLUSTER_G2	0.00181488	0.0261512	0.66129	1.87571	0	19
GSE14350_TREG_VS_TEFF_IN_IL2RB_KO_DN	0.00157729	0.02584	0.473828	1.87502	0	106
GSE46606_UNSTIM_VS_CD40L_IL2_IL5_3DAY_STIMULATED_IRF4MID_SORTED_BCELL_DN	0.00145985	0.02584	0.453819	1.87451	0	144
GSE17721_CTRL_VS_POLYIC_8H_BMDC_DN	0.0014771	0.02584	0.458337	1.87294	0	128
GSE46242_CTRL_VS_EGR2_DELETED_ANERGIC_TH1_CD4_TCELL_DN	0.00147929	0.02584	0.45904	1.87237	0	127
YEGNASUBRAMANIAN_PROSTATE_CANCER	0.00165289	0.02584	0.519549	1.87148	0	61
FOURNIER_ACINAR_DEVELOPMENT_LATE_2	0.0013587	0.02584	0.421323	1.87114	0	247
NAKAMURA_CANCER_MICROENVIRONMENT_DN	0.003367	0.0301314	0.556875	1.86994	1	41
GSE5589_WT_VS_IL6_KO_LPS_AND_IL10_STIM_MACROPHAGE_45MIN_UP	0.00142653	0.02584	0.4449	1.86973	0	159
GSE13485_CTRL_VS_DAY1_YF17D_VACCINE_PBMC_UP	0.00142248	0.02584	0.44204	1.86954	0	166
REACTOME_NUCLEOTIDE_EXCISION_REPAIR	0.00328947	0.0301314	0.538627	1.86946	1	48
BENPORATH_ES_2	0.0017331	0.02584	0.619719	1.86931	0	24
GSE23568_ID3_KO_VS_WT_CD8_TCELL_UP	0.00142248	0.02584	0.440903	1.8687	0	169
GSE45365_NK_CELL_VS_BCELL_MCMV_INFECTION_DN	0.00142857	0.02584	0.44565	1.8686	0	156
GSE18791_CTRL_VS_NEWCASTLE_VIRUS_DC_2H_DN	0.00160256	0.02584	0.481259	1.8685	0	98
GO_RECIPROCAL_MEIOTIC_RECOMBINATION	0.00170068	0.02584	0.599642	1.86822	0	28
GO_RECIPROCAL_DNA_RECOMBINATION	0.00170068	0.02584	0.599642	1.86822	0	28
GSE3982_MEMORY_CD4_TCELL_VS_TH1_DN	0.00142248	0.02584	0.439117	1.8678	0	173
GO_CYCLIN_DEPENDENT_PROTEIN_SERINE_THREONINE_KINASE_REGULATOR_ACTIVITY	0.0017331	0.02584	0.619049	1.86729	0	24
ZHANG_BREAST_CANCER_PROGENITORS_UP	0.00127551	0.02584	0.40658	1.86729	0	355
JACKSON_DNMT1_TARGETS_UP	0.00335008	0.0301314	0.536087	1.86619	1	51
GSE3039_NKT_CELL_VS_B2_BCELL_DN	0.00149254	0.02584	0.460037	1.86407	0	120
GO_PROTEIN_LOCALIZATION_TO_CENTROSOME	0.00547445	0.0393747	0.700435	1.86347	2	15
GO_CYTOKINE_ACTIVITY	0.00340136	0.0301314	0.547501	1.86268	1	45
GO_POSTREPLICATION_REPAIR	0.00336134	0.0301314	0.536651	1.86206	1	49
DORN_ADENOVIRUS_INFECTION_32HR_DN	0.0017301	0.02584	0.603483	1.86165	0	26
GSE12963_UNINF_VS_ENV_AND_NEF_DEFICIENT_HIV1_INF_CD4_TCELL_DN	0.00161031	0.02584	0.488083	1.86065	0	85
MODULE_133	0.00547445	0.0393747	0.699067	1.85983	2	15
MODULE_123	0.00143678	0.02584	0.443976	1.85977	0	157
GSE9960_HEALTHY_VS_GRAM_NEG_SEPSIS_PBMC_DN	0.00146628	0.02584	0.449749	1.85932	0	145
GEORGES_CELL_CYCLE_MIR192_TARGETS	0.003367	0.0301314	0.52772	1.85871	1	54
GSE42021_TREG_PLN_VS_CD24INT_TREG_THYMUS_UP	0.00144509	0.02584	0.445512	1.85867	0	154
GO_MYELOID_LEUKOCYTE_MIGRATION	0.00170068	0.02584	0.592416	1.85859	0	29
DUTTA_APOPTOSIS_VIA_NFKB	0.00170068	0.02584	0.59632	1.85787	0	28
GSE2706_R848_VS_LPS_8H_STIM_DC_DN	0.00159236	0.02584	0.474077	1.85787	0	102
MODULE_160	0.00547445	0.0393747	0.698286	1.85775	2	15
DORN_ADENOVIRUS_INFECTION_48HR_DN	0.00347826	0.0301314	0.608324	1.85684	1	25
GSE43863_TFH_VS_LY6C_INT_CXCR5POS_MEMORY_CD4_TCELL_UP	0.00148148	0.02584	0.455371	1.85651	0	126
GSE45365_WT_VS_IFNAR_KO_CD8A_DC_DN	0.00147929	0.02584	0.451109	1.8564	0	140
GCNP_SHH_UP_EARLY.V1_UP	0.0014771	0.02584	0.454235	1.85618	0	128
GO_REGULATION_OF_DNA_REPAIR	0.00164204	0.02584	0.515709	1.85601	0	60
CEBALLOS_TARGETS_OF_TP53_AND_MYC_UP	0.00181488	0.0261512	0.654111	1.85535	0	19
RASHI_RESPONSE_TO_IONIZING_RADIATION_1	0.00172414	0.02584	0.590734	1.85529	0	30
JAZAERI_BREAST_CANCER_BRCA1_VS_BRCA2_DN	0.00347826	0.0301314	0.60763	1.85473	1	25
GSE360_CTRL_VS_T_GONDII_DC_DN	0.00150602	0.02584	0.45806	1.85386	0	118
GO_POSITIVE_REGULATION_OF_OSSIFICATION	0.00347222	0.0301314	0.566953	1.85336	1	37
GSE20715_0H_VS_48H_OZONE_LUNG_DN	0.00144092	0.02584	0.446296	1.85281	0	148
GSE37534_GW1929_VS_PIOGLITAZONE_TREATED_CD4_TCELL_PPARG1_FOXP3_TRANSDUCED_DN	0.00144509	0.02584	0.443909	1.85198	0	154
GSE16266_CTRL_VS_LPS_STIM_MEF_UP	0.00147493	0.02584	0.449807	1.85161	0	143
GSE21670_UNTREATED_VS_TGFB_IL6_TREATED_CD4_TCELL_UP	0.00141643	0.02584	0.437214	1.85059	0	167
GSE27786_LSK_VS_ERYTHROBLAST_DN	0.00161551	0.02584	0.487817	1.84985	0	83
AMIT_EGF_RESPONSE_60_HELA	0.00344234	0.0301314	0.573706	1.8498	1	34
GSE22140_HEALTHY_VS_ARTHRITIC_GERMFREE_MOUSE_CD4_TCELL_DN	0.00145985	0.02584	0.447649	1.84902	0	144
GSE15324_NAIVE_VS_ACTIVATED_CD8_TCELL_DN	0.00146199	0.02584	0.448285	1.84885	0	139
GO_NEGATIVE_REGULATION_OF_FAT_CELL_DIFFERENTIATION	0.00178571	0.0261512	0.643521	1.84833	0	20
GSE18281_CORTICAL_VS_MEDULLARY_THYMOCYTE_UP	0.00148148	0.02584	0.450744	1.84813	0	137
GSE7460_CTRL_VS_TGFB_TREATED_ACT_TREG_UP	0.00143678	0.02584	0.440053	1.84784	0	161
GSE17721_PAM3CSK4_VS_GADIQUIMOD_8H_BMDC_DN	0.00143472	0.02584	0.442736	1.84756	0	151
REACTOME_CELL_CYCLE_CHECKPOINTS	0.00155521	0.02584	0.463641	1.84752	0	109
GNF2_HAT1	0.0033557	0.0301314	0.529591	1.84688	1	50
chr16q12	0.00170068	0.02584	0.588661	1.84681	0	29
TGACGTCA_V$ATF3_Q6	0.00145138	0.02584	0.445476	1.8468	0	147
GSE28726_NAIVE_CD4_TCELL_VS_NAIVE_VA24NEG_NKTCELL_UP	0.00143062	0.02584	0.433901	1.84646	0	178
GSE41087_WT_VS_FOXP3_MUT_ANTI_CD3_CD28_STIM_CD4_TCELL_UP	0.00149477	0.02584	0.450925	1.84571	0	132
GSE17721_LPS_VS_POLYIC_1H_BMDC_UP	0.0014881	0.02584	0.453458	1.84544	0	124
KEGG_GLYCINE_SERINE_AND_THREONINE_METABOLISM	0.00365631	0.0309891	0.684223	1.84538	1	16
PID_P38_ALPHA_BETA_DOWNSTREAM_PATHWAY	0.00172414	0.02584	0.587377	1.84475	0	30
GSE13411_NAIVE_VS_MEMORY_BCELL_UP	0.00162602	0.02584	0.498586	1.84412	0	71
YWATTWNNRGCT_UNKNOWN	0.00347222	0.0301314	0.563999	1.84371	1	37
ZHOU_INFLAMMATORY_RESPONSE_LIVE_UP	0.00137931	0.02584	0.418015	1.84318	0	230
GSE23925_DARK_ZONE_VS_NAIVE_BCELL_DN	0.00149477	0.02584	0.449842	1.84246	0	133
YIH_RESPONSE_TO_ARSENITE_C1	0.00180832	0.0261512	0.65862	1.8423	0	18
WONG_ADULT_TISSUE_STEM_MODULE	0.00125945	0.02584	0.398652	1.8412	0	387
GSE18791_CTRL_VS_NEWCASTLE_VIRUS_DC_8H_DN	0.0015083	0.02584	0.455384	1.84061	0	119
GSE19923_WT_VS_HEB_AND_E2A_KO_DP_THYMOCYTE_DN	0.00144092	0.02584	0.441126	1.84042	0	153
GO_POSITIVE_REGULATION_OF_OSTEOBLAST_DIFFERENTIATION	0.00169492	0.02584	0.595328	1.83961	0	27
GSE45739_NRAS_KO_VS_WT_ACD3_ACD28_STIM_CD4_TCELL_UP	0.00144092	0.02584	0.443078	1.83945	0	148
GSE14769_UNSTIM_VS_120MIN_LPS_BMDM_DN	0.00145138	0.02584	0.443682	1.83936	0	147
GSE40277_EOS_AND_LEF1_TRANSDUCED_VS_GATA1_AND_SATB1_TRANSDUCED_CD4_TCELL_DN	0.0014556	0.02584	0.444046	1.83835	0	146
GSE15930_NAIVE_VS_72H_IN_VITRO_STIM_IFNAB_CD8_TCELL_DN	0.00141044	0.02584	0.43046	1.83747	0	180
GSE17721_CTRL_VS_LPS_4H_BMDC_DN	0.00151745	0.02584	0.457206	1.8368	0	111
GO_I_KAPPAB_KINASE_NF_KAPPAB_SIGNALING	0.00330033	0.0301314	0.512278	1.83613	1	59
VARELA_ZMPSTE24_TARGETS_UP	0.0017301	0.02584	0.57861	1.83483	0	32
GO_REGULATION_OF_CYCLIN_DEPENDENT_PROTEIN_KINASE_ACTIVITY	0.00163934	0.02584	0.497674	1.83431	0	69
GSE35825_UNTREATED_VS_IFNA_STIM_MACROPHAGE_DN	0.00155521	0.02584	0.460317	1.83427	0	109
GSE17721_0.5H_VS_12H_CPG_BMDC_DN	0.00145138	0.02584	0.44245	1.83425	0	147
KANG_FLUOROURACIL_RESISTANCE_UP	0.00547445	0.0393747	0.689354	1.83399	2	15
NGUYEN_NOTCH1_TARGETS_DN	0.00325203	0.0301314	0.501914	1.83279	1	65
GSE37605_FOXP3_FUSION_GFP_VS_IRES_GFP_TREG_C57BL6_UP	0.00155039	0.02584	0.460307	1.83269	0	108
WEST_ADRENOCORTICAL_TUMOR_UP	0.00134409	0.02584	0.40987	1.83258	0	263
BILBAN_B_CLL_LPL_DN	0.0017452	0.02584	0.582462	1.8319	0	31
OKUMURA_INFLAMMATORY_RESPONSE_LPS	0.00149477	0.02584	0.451572	1.83131	0	121
ZHOU_INFLAMMATORY_RESPONSE_FIMA_UP	0.00140252	0.02584	0.420013	1.83114	0	215
LTE2_UP.V1_DN	0.00148588	0.02584	0.446136	1.83093	0	134
GO_MITOTIC_NUCLEAR_DIVISION	0.00129534	0.02584	0.402001	1.83087	0	317
JNK_DN.V1_UP	0.00159744	0.02584	0.488252	1.83067	0	75
MODULE_300	0.0017762	0.0261372	0.62576	1.83046	0	21
GSE21546_ELK1_KO_VS_SAP1A_KO_AND_ELK1_KO_ANTI_CD3_STIM_DP_THYMOCYTES_DN	0.00146199	0.02584	0.443804	1.83037	0	139
TOYOTA_TARGETS_OF_MIR34B_AND_MIR34C	0.00127389	0.02584	0.39799	1.83032	0	380
GSE41176_UNSTIM_VS_ANTI_IGM_STIM_BCELL_3H_UP	0.00153374	0.02584	0.453527	1.83008	0	114
GO_RESPONSE_TO_RADIATION	0.00133333	0.02584	0.407956	1.83008	0	265
GO_CELLULAR_RESPONSE_TO_EXTRACELLULAR_STIMULUS	0.00149701	0.02584	0.450685	1.82987	0	122
GSE17974_0H_VS_1H_IN_VITRO_ACT_CD4_TCELL_DN	0.001443	0.02584	0.438853	1.82974	0	152
GO_DOUBLE_STRAND_BREAK_REPAIR	0.00145985	0.02584	0.442973	1.82971	0	144
SABATES_COLORECTAL_ADENOMA_UP	0.00344234	0.0301314	0.567444	1.82961	1	34
GO_POSITIVE_REGULATION_OF_ERK1_AND_ERK2_CASCADE	0.003367	0.0301314	0.51945	1.82958	1	54
UDAYAKUMAR_MED1_TARGETS_DN	0.00142248	0.02584	0.4299	1.82859	0	173
GSE40277_EOS_AND_LEF1_TRANSDUCED_VS_CTRL_CD4_TCELL_UP	0.00146628	0.02584	0.442207	1.82814	0	145
V$CREL_01	0.00145138	0.02584	0.440872	1.82771	0	147
GO_ORGANELLE_FISSION	0.00126904	0.02584	0.395696	1.82751	0	393
GO_MITOTIC_SISTER_CHROMATID_SEGREGATION	0.00161812	0.02584	0.480504	1.8271	0	84
GSE22886_DAY0_VS_DAY1_MONOCYTE_IN_CULTURE_DN	0.00144092	0.02584	0.440071	1.82697	0	148
EGFR_UP.V1_UP	0.00149477	0.02584	0.450441	1.82672	0	121
GSE42021_CD24HI_VS_CD24LOW_TCONV_THYMUS_DN	0.001443	0.02584	0.438099	1.8266	0	152
HELLER_HDAC_TARGETS_DN	0.00138889	0.02584	0.416662	1.82656	0	222
GSE23308_WT_VS_MINERALCORTICOID_REC_KO_MACROPHAGE_DN	0.00148588	0.02584	0.446109	1.82629	0	131
GSE1432_CTRL_VS_IFNG_6H_MICROGLIA_DN	0.00144092	0.02584	0.436636	1.82605	0	155
GSE40274_FOXP3_VS_FOXP3_AND_HELIOS_TRANSDUCED_ACTIVATED_CD4_TCELL_DN	0.00152672	0.02584	0.456027	1.82603	0	110
GO_SERINE_FAMILY_AMINO_ACID_METABOLIC_PROCESS	0.00170068	0.02584	0.58609	1.826	0	28
GO_NEGATIVE_REGULATION_OF_EXTRINSIC_APOPTOTIC_SIGNALING_PATHWAY_VIA_DEATH_DOMAIN_RECEPTORS	0.00174216	0.02584	0.614695	1.82568	0	22
GSE17721_CTRL_VS_CPG_12H_BMDC_DN	0.00149925	0.02584	0.449391	1.82557	0	123
HALLMARK_UNFOLDED_PROTEIN_RESPONSE	0.00158479	0.02584	0.463334	1.82557	0	104
BROWNE_HCMV_INFECTION_16HR_UP	0.0014245	0.02584	0.428483	1.82536	0	177
HAHTOLA_MYCOSIS_FUNGOIDES_CD4_UP	0.003367	0.0301314	0.541749	1.82368	1	42
GSE17721_LPS_VS_GARDIQUIMOD_2H_BMDC_UP	0.0014881	0.02584	0.448081	1.82356	0	124
WIERENGA_STAT5A_TARGETS_UP	0.0014881	0.02584	0.448056	1.82346	0	124
GSE6674_CPG_VS_PL2_3_STIM_BCELL_DN	0.001443	0.02584	0.433468	1.8224	0	164
EGFR_UP.V1_DN	0.00147929	0.02584	0.442606	1.82141	0	140
NFE2L2.V2	0.00139665	0.02584	0.421134	1.82099	0	196
BIOCARTA_STRESS_PATHWAY	0.00174216	0.02584	0.612621	1.81952	0	22
GSE21670_UNTREATED_VS_TGFB_IL6_TREATED_STAT3_KO_CD4_TCELL_UP	0.00143472	0.02584	0.429238	1.81799	0	171
GSE37416_0H_VS_3H_F_TULARENSIS_LVS_NEUTROPHIL_DN	0.00142653	0.02584	0.432207	1.81639	0	159
GSE13484_3H_UNSTIM_VS_YF17D_VACCINE_STIM_PBMC_DN	0.00149477	0.02584	0.443412	1.81612	0	133
GSE7568_IL4_VS_IL4_AND_DEXAMETHASONE_TREATED_MACROPHAGE_UP	0.00144509	0.02584	0.435168	1.81552	0	154
GSE2197_IMMUNOSUPPRESSIVE_DNA_VS_UNTREATED_IN_DC_UP	0.00144092	0.02584	0.437287	1.81541	0	148
KIM_WT1_TARGETS_DN	0.00128866	0.02584	0.395497	1.81519	0	370
SUH_COEXPRESSED_WITH_ID1_AND_ID2_UP	0.00548446	0.0393747	0.672802	1.81458	2	16
SUNG_METASTASIS_STROMA_DN	0.00338409	0.0301314	0.533462	1.81449	1	43
GO_ENDODEOXYRIBONUCLEASE_ACTIVITY	0.003367	0.0301314	0.531204	1.81323	1	46
MMS_MOUSE_LYMPH_HIGH_4HRS_UP	0.00174216	0.02584	0.569436	1.81303	0	33
GO_RESPONSE_TO_TUMOR_NECROSIS_FACTOR	0.00147929	0.02584	0.444485	1.813	0	127
SHAFFER_IRF4_TARGETS_IN_PLASMA_CELL_VS_MATURE_B_LYMPHOCYTE	0.00330033	0.0301314	0.505801	1.81292	1	59
GSE37533_PPARG1_FOXP3_VS_PPARG2_FOXP3_TRANSDUCED_CD4_TCELL_PIOGLITAZONE_TREATED_DN	0.00143678	0.02584	0.432186	1.8125	0	158
GSE42021_TCONV_PLN_VS_CD24HI_TCONV_THYMUS_UP	0.00143678	0.02584	0.43201	1.81177	0	158
REACTOME_AMINO_ACID_AND_OLIGOPEPTIDE_SLC_TRANSPORTERS	0.00174216	0.02584	0.609851	1.8113	0	22
KEGG_NOD_LIKE_RECEPTOR_SIGNALING_PATHWAY	0.00342466	0.0301314	0.544408	1.81052	1	40
MODULE_35	0.00548446	0.0393747	0.671079	1.80993	2	16
GSE8921_UNSTIM_VS_TLR1_2_STIM_MONOCYTE_3H_UP	0.00148588	0.02584	0.442087	1.80982	0	131
GSE22196_HEALTHY_VS_OBESE_MOUSE_SKIN_GAMMADELTA_TCELL_DN	0.00145138	0.02584	0.436379	1.80908	0	147
V$CREBP1CJUN_01	0.00142248	0.02584	0.427435	1.80867	0	168
GSE18791_CTRL_VS_NEWCASTLE_VIRUS_DC_14H_DN	0.00162866	0.02584	0.471903	1.80823	0	92
GSE42724_MEMORY_VS_B1_BCELL_DN	0.0014771	0.02584	0.442428	1.80793	0	128
GO_APOPTOTIC_SIGNALING_PATHWAY	0.0013947	0.02584	0.414691	1.8076	0	212
GO_ER_NUCLEUS_SIGNALING_PATHWAY	0.00172414	0.02584	0.575488	1.80741	0	30
GSE14415_INDUCED_TREG_VS_FOXP3_KO_INDUCED_TREG_IL2_CULTURE_UP	0.00151745	0.02584	0.449728	1.80676	0	111
CORRE_MULTIPLE_MYELOMA_UP	0.00347826	0.0301314	0.60277	1.80673	1	23
GSE14415_INDUCED_TREG_VS_FAILED_INDUCED_TREG_UP	0.00142653	0.02584	0.425254	1.80626	0	172
PID_HIV_NEF_PATHWAY	0.0017301	0.02584	0.569429	1.80572	0	32
HANN_RESISTANCE_TO_BCL2_INHIBITOR_DN	0.00362976	0.0308033	0.63654	1.80551	1	19
GSE21546_WT_VS_ELK1_KO_ANTI_CD3_STIM_DP_THYMOCYTES_DN	0.00143678	0.02584	0.430491	1.8054	0	158
GSE21670_STAT3_KO_VS_WT_CD4_TCELL_TGFB_TREATED_UP	0.00142248	0.02584	0.426528	1.80483	0	168
MARZEC_IL2_SIGNALING_UP	0.00161031	0.02584	0.486461	1.80388	0	72
REACTOME_CYTOSOLIC_TRNA_AMINOACYLATION	0.0034662	0.0301314	0.597806	1.80321	1	24
GSE38681_WT_VS_LYL1_KO_LYMPHOID_PRIMED_MULTIPOTENT_PROGENITOR_DN	0.00144509	0.02584	0.432149	1.80292	0	154
GSE17721_0.5H_VS_8H_POLYIC_BMDC_DN	0.0014556	0.02584	0.43547	1.80284	0	146
GO_NEUTRAL_AMINO_ACID_TRANSMEMBRANE_TRANSPORTER_ACTIVITY	0.00548446	0.0393747	0.668164	1.80207	2	16
GSE13547_WT_VS_ZFX_KO_BCELL_DN	0.00146628	0.02584	0.435836	1.8018	0	145
chr17q12	0.003367	0.0301314	0.53597	1.79974	1	41
GSE37301_MULTIPOTENT_PROGENITOR_VS_LYMPHOID_PRIMED_MPP_DN	0.00149477	0.02584	0.443523	1.79866	0	121
GSE22313_HEALTHY_VS_SLE_MOUSE_CD4_TCELL_DN	0.00143472	0.02584	0.430856	1.79798	0	151
GSE360_LOW_DOSE_B_MALAYI_VS_M_TUBERCULOSIS_DC_DN	0.0014771	0.02584	0.436691	1.79739	0	138
GO_ERROR_PRONE_TRANSLESION_SYNTHESIS	0.00362976	0.0308033	0.633515	1.79693	1	19
EGUCHI_CELL_CYCLE_RB1_TARGETS	0.00347826	0.0301314	0.599415	1.79668	1	23
GO_LEUKOCYTE_CHEMOTAXIS	0.00344234	0.0301314	0.557184	1.79653	1	34
NIKOLSKY_BREAST_CANCER_19Q13.1_AMPLICON	0.00178571	0.0261512	0.625349	1.79613	0	20
GO_RESPONSE_TO_ARSENIC_CONTAINING_SUBSTANCE	0.0035524	0.0304524	0.614003	1.79607	1	21
UZONYI_RESPONSE_TO_LEUKOTRIENE_AND_THROMBIN	0.00362976	0.0308033	0.633192	1.79602	1	19
GSE360_CTRL_VS_L_DONOVANI_DC_DN	0.00157729	0.02584	0.453832	1.7959	0	106
chr14q13	0.00180832	0.0261512	0.641868	1.79544	0	18
GSE9988_LOW_LPS_VS_ANTI_TREM1_AND_LPS_MONOCYTE_DN	0.00149477	0.02584	0.43836	1.79543	0	133
GSE19198_1H_VS_6H_IL21_TREATED_TCELL_DN	0.00146628	0.02584	0.434212	1.79509	0	145
GO_SITE_OF_DOUBLE_STRAND_BREAK	0.00338983	0.0301314	0.580789	1.79469	1	27
GO_NEGATIVE_REGULATION_OF_PROTEIN_MATURATION	0.00554529	0.0397472	0.652741	1.79461	2	17
GO_NEGATIVE_REGULATION_OF_PROTEIN_PROCESSING	0.00554529	0.0397472	0.652741	1.79461	2	17
GSE360_T_GONDII_VS_B_MALAYI_HIGH_DOSE_DC_UP	0.00151286	0.02584	0.443163	1.79358	0	117
GSE18791_CTRL_VS_NEWCASTLE_VIRUS_DC_4H_DN	0.00149925	0.02584	0.441492	1.79349	0	123
ST_GAQ_PATHWAY	0.00174216	0.02584	0.60381	1.79335	0	22
GO_G2_DNA_DAMAGE_CHECKPOINT	0.00340136	0.0301314	0.571346	1.79248	1	29
GSE30971_CTRL_VS_LPS_STIM_MACROPHAGE_WBP7_KO_2H_UP	0.00150602	0.02584	0.444732	1.79215	0	112
V$NFKB_Q6	0.0014556	0.02584	0.432654	1.79119	0	146
GO_REGULATION_OF_CENTROSOME_CYCLE	0.0034662	0.0301314	0.550652	1.79102	1	36
GSE17301_CTRL_VS_48H_ACD3_ACD28_IFNA2_STIM_CD8_TCELL_DN	0.001443	0.02584	0.429494	1.79073	0	152
GO_RESPONSE_TO_HYDROGEN_PEROXIDE	0.00159744	0.02584	0.477589	1.79069	0	75
GSE17721_CTRL_VS_PAM3CSK4_1H_BMDC_DN	0.00155039	0.02584	0.449724	1.79055	0	108
GSE17721_0.5H_VS_8H_CPG_BMDC_DN	0.00147493	0.02584	0.434712	1.78948	0	143
chr1p31	0.003367	0.0301314	0.531498	1.78917	1	42
ZHU_CMV_ALL_UP	0.00158228	0.02584	0.456586	1.78897	0	101
GSE3982_EFF_MEMORY_CD4_TCELL_VS_TH1_DN	0.001443	0.02584	0.42536	1.78831	0	164
GSE25123_ROSIGLITAZONE_VS_IL4_AND_ROSIGLITAZONE_STIM_PPARG_KO_MACROPHAGE_DAY10_UP	0.00143472	0.02584	0.428315	1.78738	0	151
GO_TRANSLESION_SYNTHESIS	0.0034662	0.0301314	0.549517	1.78733	1	36
GSE11961_GERMINAL_CENTER_BCELL_DAY7_VS_PLASMA_CELL_DAY7_UP	0.00149477	0.02584	0.436604	1.78709	0	132
GO_DNA_DEPENDENT_ATPASE_ACTIVITY	0.00158983	0.02584	0.475633	1.78659	0	76
YIH_RESPONSE_TO_ARSENITE_C3	0.00340136	0.0301314	0.569322	1.78613	1	29
GSE43863_NAIVE_VS_LY6C_LOW_CXCR5NEG_CD4_EFF_TCELL_D6_LCMV_UP	0.00319489	0.0301314	0.472227	1.78582	1	81
GSE27859_MACROPHAGE_VS_DC_UP	0.0015083	0.02584	0.441716	1.78536	0	119
GSE360_HIGH_DOSE_B_MALAYI_VS_M_TUBERCULOSIS_DC_DN	0.00149477	0.02584	0.44017	1.78507	0	121
TURASHVILI_BREAST_DUCTAL_CARCINOMA_VS_DUCTAL_NORMAL_DN	0.00330579	0.0301314	0.495554	1.78505	1	61
GSE2405_HEAT_KILLED_LYSATE_VS_LIVE_A_PHAGOCYTOPHILUM_STIM_NEUTROPHIL_9H_UP	0.0014771	0.02584	0.433664	1.78493	0	138
GO_CELL_CYCLE_CHECKPOINT	0.00141443	0.02584	0.421034	1.7839	0	165
MODULE_1	0.00143472	0.02584	0.417886	1.78385	0	186
GSE2706_LPS_VS_R848_AND_LPS_8H_STIM_DC_DN	0.00160514	0.02584	0.466092	1.78384	0	86
SESTO_RESPONSE_TO_UV_C1	0.00504202	0.0381067	0.514017	1.78353	2	49
WANG_METASTASIS_OF_BREAST_CANCER_ESR1_UP	0.00362976	0.0308033	0.62876	1.78344	1	19
GSE32986_CURDLAN_LOWDOSE_VS_CURDLAN_HIGHDOSE_STIM_DC_DN	0.00148588	0.02584	0.434407	1.7828	0	134
GSE19401_UNSTIM_VS_PAM2CSK4_STIM_FOLLICULAR_DC_UP	0.0014771	0.02584	0.433098	1.7826	0	138
FINETTI_BREAST_CANCER_KINOME_RED	0.00548446	0.0393747	0.660896	1.78247	2	16
BENPORATH_ES_1	0.00134048	0.02584	0.397553	1.78201	0	267
MODULE_110	0.00731261	0.0468936	0.660701	1.78194	3	16
DACOSTA_UV_RESPONSE_VIA_ERCC3_COMMON_UP	0.00325733	0.0301314	0.490452	1.78179	1	63
GSE28737_FOLLICULAR_VS_MARGINAL_ZONE_BCELL_DN	0.00160772	0.02584	0.458993	1.78168	0	99
ZHU_CMV_8_HR_UP	0.00344234	0.0301314	0.552454	1.78128	1	34
GSE30971_CTRL_VS_LPS_STIM_MACROPHAGE_WBP7_KO_4H_UP	0.00153374	0.02584	0.441138	1.78009	0	114
GSE37301_HEMATOPOIETIC_STEM_CELL_VS_GRAN_MONO_PROGENITOR_DN	0.00147929	0.02584	0.436366	1.77988	0	127
GO_RESPONSE_TO_STARVATION	0.00159236	0.02584	0.454004	1.77921	0	102
KASLER_HDAC7_TARGETS_2_DN	0.00521739	0.0387724	0.593576	1.77918	2	23
GSE15139_GMCSF_TREATED_VS_UNTREATED_NEUTROPHILS_UP	0.00145985	0.02584	0.430738	1.77917	0	144
MORI_PRE_BI_LYMPHOCYTE_UP	0.00162602	0.02584	0.480972	1.77897	0	71
BILD_HRAS_ONCOGENIC_SIGNATURE	0.00143885	0.02584	0.427428	1.77796	0	149
GO_K63_LINKED_POLYUBIQUITIN_BINDING	0.00731261	0.0468936	0.659009	1.77738	3	16
GSE14415_ACT_TCONV_VS_ACT_NATURAL_TREG_DN	0.00147929	0.02584	0.4332	1.77711	0	135
GSE2405_HEAT_KILLED_VS_LIVE_A_PHAGOCYTOPHILUM_STIM_NEUTROPHIL_9H_DN	0.00148148	0.02584	0.43579	1.77668	0	126
GSE21546_WT_VS_SAP1A_KO_AND_ELK1_KO_DP_THYMOCYTES_UP	0.00147929	0.02584	0.431479	1.77562	0	140
GO_POSITIVE_REGULATION_OF_NEURON_DEATH	0.00491803	0.0375743	0.512407	1.77556	2	47
ABBUD_LIF_SIGNALING_1_UP	0.00348432	0.0301447	0.597709	1.77523	1	22
ZHANG_RESPONSE_TO_IKK_INHIBITOR_AND_TNF_DN	0.00159744	0.02584	0.475636	1.77468	0	73
GSE8921_UNSTIM_VS_TLR1_2_STIM_MONOCYTE_6H_DN	0.00151286	0.02584	0.438391	1.77427	0	117
GO_KINETOCHORE	0.00158479	0.02584	0.450246	1.774	0	104
MODULE_53	0.00131062	0.02584	0.393277	1.77329	0	281
WHITFIELD_CELL_CYCLE_LITERATURE	0.00337268	0.0301314	0.521054	1.77311	1	44
PID_IL12_2PATHWAY	0.00347222	0.0301314	0.539855	1.77306	1	38
MUELLER_PLURINET	0.00133869	0.02584	0.395144	1.77152	0	266
BHATI_G2M_ARREST_BY_2METHOXYESTRADIOL_DN	0.0015949	0.02584	0.461186	1.771	0	89
GSE24634_TEFF_VS_TCONV_DAY5_IN_CULTURE_UP	0.00143062	0.02584	0.41603	1.77041	0	178
GSE17721_0.5H_VS_4H_GARDIQUIMOD_BMDC_DN	0.0014556	0.02584	0.42757	1.77014	0	146
GO_DNA_DEPENDENT_DNA_REPLICATION_MAINTENANCE_OF_FIDELITY	0.00542495	0.0392081	0.632809	1.7701	2	18
GO_ALPHA_AMINO_ACID_BIOSYNTHETIC_PROCESS	0.00330579	0.0301314	0.495237	1.76992	1	57
VEGF_A_UP.V1_UP	0.00160772	0.02584	0.455942	1.76984	0	99
REACTOME_AMINO_ACID_TRANSPORT_ACROSS_THE_PLASMA_MEMBRANE	0.00739372	0.0472041	0.6435	1.76921	3	17
GO_REGULATION_OF_EPIDERMAL_CELL_DIFFERENTIATION	0.00357143	0.030522	0.615827	1.76878	1	20
GO_CD4_POSITIVE_ALPHA_BETA_T_CELL_ACTIVATION	0.00357143	0.030522	0.615628	1.76821	1	20
FARMER_BREAST_CANCER_CLUSTER_2	0.0034904	0.0301718	0.562208	1.7682	1	31
FEVR_CTNNB1_TARGETS_DN	0.00125471	0.02584	0.37809	1.7676	0	454
P53_DN.V2_UP	0.00493421	0.0376117	0.509177	1.76724	2	48
SHEPARD_BMYB_MORPHOLINO_DN	0.00150602	0.02584	0.436528	1.76672	0	118
GO_REGULATION_OF_DNA_METABOLIC_PROCESS	0.00136054	0.02584	0.398151	1.76659	0	246
GSE29949_MICROGLIA_VS_DC_BRAIN_UP	0.00147275	0.02584	0.430359	1.76616	0	136
GO_CELLULAR_AMINO_ACID_BIOSYNTHETIC_PROCESS	0.00330033	0.0301314	0.488534	1.76562	1	62
GSE18804_BRAIN_VS_COLON_TUMORAL_MACROPHAGE_UP	0.00159236	0.02584	0.452824	1.76424	0	100
MEINHOLD_OVARIAN_CANCER_LOW_GRADE_UP	0.0127737	0.0687522	0.662955	1.76375	6	15
GO_RESPONSE_TO_UV	0.00158479	0.02584	0.44753	1.7633	0	104
YAO_TEMPORAL_RESPONSE_TO_PROGESTERONE_CLUSTER_1	0.00342466	0.0301314	0.530183	1.76321	1	40
GSE3982_DC_VS_TH1_DN	0.001443	0.02584	0.423495	1.7631	0	150
PLASARI_TGFB1_TARGETS_10HR_UP	0.00161551	0.02584	0.46485	1.76276	0	83
GO_CENTRIOLAR_SATELLITE	0.00907441	0.0548662	0.621135	1.76182	4	19
GSE39152_BRAIN_VS_SPLEEN_CD103_NEG_MEMORY_CD8_TCELL_DN	0.001443	0.02584	0.419054	1.7618	0	164
LAU_APOPTOSIS_CDKN2A_UP	0.00335008	0.0301314	0.505704	1.76042	1	51
GSE35825_UNTREATED_VS_IFNG_STIM_MACROPHAGE_UP	0.00147929	0.02584	0.429095	1.76027	0	135
MORF_BUB1B	0.00325733	0.0301314	0.484495	1.76015	1	63
KOKKINAKIS_METHIONINE_DEPRIVATION_48HR_DN	0.00337838	0.0301314	0.500854	1.75967	1	53
GO_CHROMOSOMAL_REGION	0.00131406	0.02584	0.390037	1.75858	0	283
HINATA_NFKB_TARGETS_KERATINOCYTE_UP	0.00340136	0.0301314	0.516783	1.75817	1	45
REACTOME_NOD1_2_SIGNALING_PATHWAY	0.00338983	0.0301314	0.568799	1.75764	1	27
GSE21546_ELK1_KO_VS_SAP1A_KO_AND_ELK1_KO_DP_THYMOCYTES_DN	0.00143678	0.02584	0.418401	1.75692	0	161
GO_DNA_REPAIR	0.00123153	0.02584	0.37668	1.75647	0	416
GSE17721_CPG_VS_GARDIQUIMOD_2H_BMDC_UP	0.00149701	0.02584	0.433602	1.75601	0	113
GSE18791_UNSTIM_VS_NEWCATSLE_VIRUS_DC_6H_UP	0.001443	0.02584	0.417568	1.75555	0	164
GSE44649_NAIVE_VS_ACTIVATED_CD8_TCELL_DN	0.00143678	0.02584	0.417294	1.75424	0	163
ONGUSAHA_TP53_TARGETS	0.00347826	0.0301314	0.57468	1.75415	1	25
V$E2F1_Q4	0.00143472	0.02584	0.410878	1.75393	0	186
GSE41867_NAIVE_VS_DAY30_LCMV_CLONE13_EXHAUSTED_CD8_TCELL_UP	0.00158228	0.02584	0.447586	1.75371	0	101
GSE17721_PAM3CSK4_VS_CPG_2H_BMDC_DN	0.00149254	0.02584	0.432716	1.75337	0	120
GO_POSITIVE_REGULATION_OF_MITOTIC_CELL_CYCLE	0.00161551	0.02584	0.46232	1.75316	0	83
REACTOME_FANCONI_ANEMIA_PATHWAY	0.00904159	0.0547423	0.626703	1.75302	4	18
GREENBAUM_E2A_TARGETS_UP	0.00510204	0.0382998	0.558682	1.75275	2	29
HALLMARK_CHOLESTEROL_HOMEOSTASIS	0.00501672	0.0380437	0.493907	1.75203	2	55
GO_MICROTUBULE_CYTOSKELETON_ORGANIZATION_INVOLVED_IN_MITOSIS	0.0034965	0.0301718	0.54272	1.75188	1	35
GO_MITOTIC_SPINDLE_ASSEMBLY	0.0034965	0.0301718	0.54272	1.75188	1	35
REACTOME_PERK_REGULATED_GENE_EXPRESSION	0.0034662	0.0301314	0.580408	1.75073	1	24
GSE7460_CD8_TCELL_VS_TREG_ACT_DN	0.00141443	0.02584	0.413179	1.75062	0	165
GO_DOUBLE_STRANDED_DNA_BINDING	0.00122549	0.02584	0.370768	1.7499	0	490
MODULE_252	0.00140252	0.02584	0.401238	1.74929	0	215
BROCKE_APOPTOSIS_REVERSED_BY_IL6	0.00150602	0.02584	0.432173	1.74909	0	118
REACTOME_CHROMOSOME_MAINTENANCE	0.00158228	0.02584	0.446375	1.74897	0	101
GCNP_SHH_UP_LATE.V1_UP	0.0014771	0.02584	0.424215	1.74604	0	138
GSE17974_0H_VS_24H_IN_VITRO_ACT_CD4_TCELL_DN	0.00143678	0.02584	0.415769	1.74551	0	160
GSE13485_DAY1_VS_DAY7_YF17D_VACCINE_PBMC_DN	0.00142653	0.02584	0.415167	1.74478	0	159
GSE22025_UNTREATED_VS_TGFB1_TREATED_CD4_TCELL_UP	0.00149254	0.02584	0.430108	1.7428	0	120
KRASNOSELSKAYA_ILF3_TARGETS_DN	0.00521739	0.0387724	0.570878	1.74254	2	25
GSE7596_AKT_TRANSD_VS_CTRL_CD4_TCONV_WITH_TGFB_UP	0.00147929	0.02584	0.424679	1.74216	0	135
GSE17721_0.5H_VS_4H_POLYIC_BMDC_DN	0.00143678	0.02584	0.414962	1.74213	0	160
PID_AP1_PATHWAY	0.00337268	0.0301314	0.511924	1.74204	1	44
GO_REGULATION_OF_MYOBLAST_DIFFERENTIATION	0.00907441	0.0548662	0.61383	1.74109	4	19
GSE17186_CD21LOW_VS_CD21HIGH_TRANSITIONAL_BCELL_UP	0.001443	0.02584	0.417588	1.74108	0	152
TURASHVILI_BREAST_DUCTAL_CARCINOMA_VS_LOBULAR_NORMAL_UP	0.00336134	0.0301314	0.497831	1.74101	1	52
GSE19401_PAM2CSK4_VS_RETINOIC_ACID_STIM_FOLLICULAR_DC_UP	0.00143472	0.02584	0.417138	1.74074	0	151
TIEN_INTESTINE_PROBIOTICS_24HR_DN	0.00142857	0.02584	0.407726	1.74049	0	188
GSE21379_TFH_VS_NON_TFH_CD4_TCELL_DN	0.00328407	0.0301314	0.483513	1.74014	1	60
MODULE_411	0.00337268	0.0301314	0.511362	1.74013	1	44
GSE37416_0H_VS_12H_F_TULARENSIS_LVS_NEUTROPHIL_DN	0.00143678	0.02584	0.413833	1.73969	0	163
MODULE_341	0.00340136	0.0301314	0.51115	1.739	1	45
GSE22886_CTRL_VS_LPS_24H_DC_DN	0.001443	0.02584	0.413624	1.73897	0	164
PID_TNF_PATHWAY	0.00342466	0.0301314	0.52243	1.73743	1	40
GSE16385_UNTREATED_VS_12H_ROSIGLITAZONE_IFNG_TNF_TREATED_MACROPHAGE_UP	0.00161031	0.02584	0.448432	1.73689	0	97
BORLAK_LIVER_CANCER_EGF_UP	0.00522648	0.0387724	0.545502	1.73683	2	33
LI_WILMS_TUMOR_VS_FETAL_KIDNEY_1_DN	0.00147929	0.02584	0.421979	1.73653	0	140
V$ATF_01	0.00142248	0.02584	0.409603	1.73604	0	169
GSE9988_LPS_VS_LPS_AND_ANTI_TREM1_MONOCYTE_DN	0.0014771	0.02584	0.424816	1.73596	0	128
ONDER_CDH1_TARGETS_1_UP	0.00161551	0.02584	0.454824	1.73595	0	87
LEE_LIVER_CANCER_CIPROFIBRATE_DN	0.00907441	0.0548662	0.611942	1.73574	4	19
BIOCARTA_CELLCYCLE_PATHWAY	0.00714286	0.0460709	0.604286	1.73564	3	20
GSE14769_UNSTIM_VS_240MIN_LPS_BMDM_DN	0.00143678	0.02584	0.412796	1.73533	0	163
GO_CENTROSOME_CYCLE	0.00338409	0.0301314	0.510146	1.73518	1	43
GSE45739_NRAS_KO_VS_WT_UNSTIM_CD4_TCELL_UP	0.00144092	0.02584	0.415817	1.73483	0	153
GSE36392_EOSINOPHIL_VS_NEUTROPHIL_IL25_TREATED_LUNG_UP	0.00148148	0.02584	0.425424	1.73442	0	126
chr11q21	0.0087108	0.0536904	0.583907	1.73424	4	22
WEST_ADRENOCORTICAL_TUMOR_MARKERS_UP	0.0109689	0.0619914	0.642921	1.73399	5	16
GSE25123_CTRL_VS_ROSIGLITAZONE_STIM_PPARG_KO_MACROPHAGE_UP	0.00157729	0.02584	0.438042	1.73341	0	106
GSE13485_DAY1_VS_DAY3_YF17D_VACCINE_PBMC_DN	0.00142653	0.02584	0.412281	1.73265	0	159
DAUER_STAT3_TARGETS_UP	0.00508475	0.0382993	0.560704	1.73262	2	27
MISSIAGLIA_REGULATED_BY_METHYLATION_UP	0.00161031	0.02584	0.454477	1.73253	0	85
GO_RNA_POLYMERASE_II_TRANSCRIPTION_FACTOR_ACTIVITY_SEQUENCE_SPECIFIC_DNA_BINDING	0.001287	0.02584	0.379173	1.73179	0	332
PUJANA_BREAST_CANCER_LIT_INT_NETWORK	0.00162338	0.02584	0.44857	1.73173	0	96
NATSUME_RESPONSE_TO_INTERFERON_BETA_UP	0.00671141	0.0443612	0.496477	1.7314	3	50
GNF2_MKI67	0.00508475	0.0382993	0.560261	1.73125	2	27
GO_EMBRYONIC_PLACENTA_DEVELOPMENT	0.00491803	0.0375743	0.499491	1.7308	2	47
GSE3982_CTRL_VS_PMA_STIM_EOSINOPHIL_DN	0.00150602	0.02584	0.429428	1.73048	0	112
GO_CELLULAR_RESPONSE_TO_MECHANICAL_STIMULUS	0.00510204	0.0382998	0.508528	1.73008	2	45
GSE46606_IRF4HIGH_VS_IRF4MID_CD40L_IL2_IL5_DAY1_STIMULATED_BCELL_DN	0.00159236	0.02584	0.443802	1.72909	0	100
GNF2_H2AFX	0.0052356	0.0387724	0.549665	1.72875	2	31
GSE19198_6H_VS_24H_IL21_TREATED_TCELL_UP	0.00147929	0.02584	0.423831	1.72875	0	127
REACTOME_TRAF6_MEDIATED_NFKB_ACTIVATION	0.00904159	0.0547423	0.617957	1.72856	4	18
GSE35685_CD34POS_CD38NEG_VS_CD34POS_CD10POS_BONE_MARROW_DN	0.00144509	0.02584	0.414293	1.72843	0	154
GSE15930_NAIVE_VS_24H_IN_VITRO_STIM_INFAB_CD8_TCELL_DN	0.00142857	0.02584	0.404312	1.72723	0	185
GSE36527_CD69_NEG_VS_POS_TREG_CD62L_LOS_KLRG1_NEG_UP	0.00146843	0.02584	0.419328	1.72695	0	142
GENTLES_LEUKEMIC_STEM_CELL_UP	0.0109689	0.0619914	0.640296	1.72691	5	16
PID_NFAT_TFPATHWAY	0.0053286	0.038916	0.590281	1.72668	2	21
GO_CYTOKINE_RECEPTOR_BINDING	0.00159236	0.02584	0.443089	1.72631	0	100
MULLIGHAN_NPM1_MUTATED_SIGNATURE_1_UP	0.00142857	0.02584	0.403964	1.72574	0	185
GSE2706_2H_VS_8H_LPS_STIM_DC_DN	0.00149477	0.02584	0.425208	1.72439	0	121
NAKAJIMA_EOSINOPHIL	0.0145985	0.0741157	0.648099	1.72423	7	15
MORF_BUB1	0.00670017	0.0443308	0.495116	1.72356	3	51
GSE22886_NAIVE_CD4_TCELL_VS_12H_ACT_TH1_DN	0.00141643	0.02584	0.403978	1.72348	0	181
FOSTER_TOLERANT_MACROPHAGE_DN	0.00131062	0.02584	0.382163	1.72318	0	281
GSE15733_BM_VS_SPLEEN_MEMORY_CD4_TCELL_UP	0.0015949	0.02584	0.448719	1.72312	0	89
GSE29617_CTRL_VS_DAY3_TIV_FLU_VACCINE_PBMC_2008_UP	0.00149477	0.02584	0.42093	1.72294	0	132
GSE45365_HEALTHY_VS_MCMV_INFECTION_CD11B_DC_DN	0.00160256	0.02584	0.443591	1.72226	0	98
GO_CELLULAR_RESPONSE_TO_BIOTIC_STIMULUS	0.00159236	0.02584	0.442009	1.7221	0	100
GSE5589_WT_VS_IL10_KO_LPS_STIM_MACROPHAGE_45MIN_UP	0.001443	0.02584	0.41298	1.72187	0	152
WAKASUGI_HAVE_ZNF143_BINDING_SITES	0.00495868	0.0376475	0.481747	1.72171	2	57
GO_TRANSCRIPTIONAL_ACTIVATOR_ACTIVITY_RNA_POLYMERASE_II_DISTAL_ENHANCER_SEQUENCE_SPECIFIC_BINDING	0.0109689	0.0619914	0.638295	1.72151	5	16
GSE37533_UNTREATED_VS_PIOGLIZATONE_TREATED_CD4_TCELL_PPARG1_AND_FOXP3_TRASDUCED_UP	0.0014771	0.02584	0.421038	1.72053	0	128
HU_GENOTOXIC_DAMAGE_24HR	0.00510204	0.0382998	0.5482	1.71987	2	29
GO_INTRINSIC_APOPTOTIC_SIGNALING_PATHWAY_IN_RESPONSE_TO_DNA_DAMAGE	0.00495868	0.0376475	0.481203	1.71977	2	57
BIOCARTA_G1_PATHWAY	0.0104348	0.0596555	0.573505	1.71902	5	23
GSE14000_TRANSLATED_RNA_VS_MRNA_DC_UP	0.00142248	0.02584	0.402944	1.71878	0	182
VERHAAK_AML_WITH_NPM1_MUTATED_UP	0.00319489	0.0301314	0.454489	1.71874	1	81
PID_ATR_PATHWAY	0.00347222	0.0301314	0.525702	1.71851	1	37
LEE_LIVER_CANCER_MYC_DN	0.0087108	0.0536904	0.57857	1.71839	4	22
GSE9037_CTRL_VS_LPS_4H_STIM_BMDM_DN	0.00145138	0.02584	0.414445	1.71815	0	147
GSE12366_GC_VS_NAIVE_BCELL_UP	0.00141643	0.02584	0.405926	1.71815	0	167
GSE27859_MACROPHAGE_VS_CD11C_INT_F480_HI_MACROPHAGE_UP	0.00147929	0.02584	0.417491	1.71806	0	140
GNF2_SMC2L1	0.00519031	0.0386793	0.541778	1.71803	2	32
GSE22886_NAIVE_CD4_TCELL_VS_12H_ACT_TH2_DN	0.00141643	0.02584	0.402601	1.7176	0	181
GSE360_L_DONOVANI_VS_B_MALAYI_LOW_DOSE_DC_UP	0.00149254	0.02584	0.423807	1.71727	0	120
GO_MICROTUBULE_ORGANIZING_CENTER_PART	0.00302572	0.0301314	0.424185	1.71677	1	117
GSE40274_IRF4_VS_FOXP3_AND_IRF4_TRANSDUCED_ACTIVATED_CD4_TCELL_DN	0.00510204	0.0382998	0.504451	1.71621	2	45
GO_AXIS_SPECIFICATION	0.00510204	0.0382998	0.504314	1.71574	2	45
GNF2_RRM2	0.00342466	0.0301314	0.515839	1.71551	1	40
GSE25123_WT_VS_PPARG_KO_MACROPHAGE_UP	0.00149477	0.02584	0.422939	1.71519	0	121
GSE23502_WT_VS_HDC_KO_MYELOID_DERIVED_SUPPRESSOR_CELL_COLON_TUMOR_UP	0.0014881	0.02584	0.421978	1.71497	0	125
HALLMARK_IL6_JAK_STAT3_SIGNALING	0.00338409	0.0301314	0.504194	1.71494	1	43
HALLMARK_TGF_BETA_SIGNALING	0.00342466	0.0301314	0.515626	1.7148	1	40
ODONNELL_TARGETS_OF_MYC_AND_TFRC_DN	0.003367	0.0301314	0.510654	1.71473	1	41
MODULE_92	0.0052356	0.0387724	0.545064	1.71428	2	31
GO_NEGATIVE_REGULATION_OF_CELL_CYCLE_G2_M_PHASE_TRANSITION	0.0053286	0.038916	0.585957	1.71403	2	21
GSE5589_IL6_KO_VS_IL10_KO_LPS_AND_IL10_STIM_MACROPHAGE_45MIN_UP	0.00149254	0.02584	0.423006	1.71402	0	120
REACTOME_TRANSPORT_OF_INORGANIC_CATIONS_ANIONS_AND_AMINO_ACIDS_OLIGOPEPTIDES	0.003367	0.0301314	0.508975	1.71336	1	42
PIGF_UP.V1_UP	0.001443	0.02584	0.411478	1.71307	0	150
MULLIGHAN_NPM1_SIGNATURE_3_UP	0.00137363	0.02584	0.387027	1.71302	0	235
GSE21380_NON_TFH_VS_GERMINAL_CENTER_TFH_CD4_TCELL_DN	0.00141643	0.02584	0.404665	1.71282	0	167
ESC_J1_UP_EARLY.V1_DN	0.00155039	0.02584	0.430192	1.71279	0	108
GO_CELLULAR_RESPONSE_TO_STARVATION	0.00323625	0.0301314	0.450124	1.71158	1	84
MCDOWELL_ACUTE_LUNG_INJURY_UP	0.00869565	0.0536467	0.560695	1.71146	4	25
MODULE_456	0.00319489	0.0301314	0.458688	1.71144	1	73
HALLMARK_IL2_STAT5_SIGNALING	0.00148148	0.02584	0.419782	1.71142	0	126
GO_CENTRIOLE	0.00319489	0.0301314	0.452496	1.7112	1	81
GSE46606_IRF4MID_VS_WT_CD40L_IL2_IL5_DAY3_STIMULATED_BCELL_UP	0.00147929	0.02584	0.415684	1.71062	0	140
GSE27786_ERYTHROBLAST_VS_MONO_MAC_UP	0.00153374	0.02584	0.423848	1.71032	0	114
GSE3039_ALPHAALPHA_CD8_TCELL_VS_B1_BCELL_DN	0.00146843	0.02584	0.415172	1.70984	0	142
GSE2585_THYMIC_MACROPHAGE_VS_MTEC_DN	0.00150602	0.02584	0.424206	1.70944	0	112
GSE10239_NAIVE_VS_KLRG1INT_EFF_CD8_TCELL_DN	0.00144509	0.02584	0.409661	1.7091	0	154
GSE23114_PERITONEAL_CAVITY_B1A_BCELL_VS_SPLEEN_BCELL_IN_SLE2C1_MOUSE_DN	0.00149254	0.02584	0.421744	1.70891	0	120
GO_CELLULAR_RESPONSE_TO_ABIOTIC_STIMULUS	0.00143678	0.02584	0.406928	1.70874	0	161
GSE45365_NK_CELL_VS_BCELL_UP	0.00143472	0.02584	0.409439	1.70861	0	151
GSE42724_NAIVE_BCELL_VS_PLASMABLAST_UP	0.00147275	0.02584	0.41628	1.70838	0	136
DORN_ADENOVIRUS_INFECTION_24HR_DN	0.00680272	0.044765	0.548326	1.70834	3	28
GO_DNA_INTEGRITY_CHECKPOINT	0.00147929	0.02584	0.418809	1.70827	0	127
TSENG_IRS1_TARGETS_UP	0.00329489	0.0301314	0.464862	1.70787	1	70
STAMBOLSKY_RESPONSE_TO_VITAMIN_D3_DN	0.0164234	0.0807361	0.641938	1.70784	8	15
GO_TELOMERE_ORGANIZATION	0.0016	0.02584	0.441425	1.70752	0	95
GSE22025_PROGESTERONE_VS_TGFB1_AND_PROGESTERONE_TREATED_CD4_TCELL_UP	0.00143885	0.02584	0.406453	1.70696	0	162
PID_AMB2_NEUTROPHILS_PATHWAY	0.010453	0.0596826	0.574697	1.70689	5	22
GSE2770_UNTREATED_VS_ACT_CD4_TCELL_6H_DN	0.00146843	0.02584	0.41436	1.70649	0	142
GSE17721_POLYIC_VS_PAM3CSK4_1H_BMDC_UP	0.0014245	0.02584	0.401336	1.70641	0	174
GO_POSITIVE_REGULATION_OF_CELL_CYCLE_PHASE_TRANSITION	0.00668896	0.0442787	0.481011	1.70628	3	55
GESERICK_TERT_TARGETS_DN	0.0164234	0.0807361	0.641205	1.70589	8	15
GSE29614_CTRL_VS_DAY7_TIV_FLU_VACCINE_PBMC_DN	0.00144509	0.02584	0.40878	1.70543	0	154
GO_PROTEIN_K63_LINKED_DEUBIQUITINATION	0.0071048	0.0460079	0.58301	1.70541	3	21
V$CEBP_C	0.00302572	0.0301314	0.420846	1.70524	1	115
GSE21670_IL6_VS_TGFB_AND_IL6_TREATED_CD4_TCELL_DN	0.00159236	0.02584	0.435083	1.70505	0	102
GSE37416_0H_VS_24H_F_TULARENSIS_LVS_NEUTROPHIL_DN	0.00144092	0.02584	0.407672	1.70492	0	155
GSE17721_12H_VS_24H_GARDIQUIMOD_BMDC_UP	0.00149477	0.02584	0.416152	1.70447	0	133
NADERI_BREAST_CANCER_PROGNOSIS_UP	0.00516351	0.0385558	0.528618	1.70442	2	34
LEE_LIVER_CANCER_MYC_TGFA_UP	0.00344234	0.0301314	0.516204	1.70407	1	39
BIOCARTA_RACCYCD_PATHWAY	0.00869565	0.0536467	0.558201	1.70385	4	25
GSE13411_IGM_VS_SWITCHED_MEMORY_BCELL_DN	0.00143678	0.02584	0.405161	1.70323	0	163
GSE8384_CTRL_VS_B_ABORTUS_4H_MAC_CELL_LINE_DN	0.00143678	0.02584	0.406051	1.7029	0	158
GSE42021_CD24INT_VS_CD24LOW_TCONV_THYMUS_UP	0.00149477	0.02584	0.419838	1.70261	0	121
GSE9946_IMMATURE_VS_PROSTAGLANDINE2_TREATED_MATURE_DC_DN	0.00327869	0.0301314	0.461773	1.70199	1	69
GO_PTERIDINE_CONTAINING_COMPOUND_BIOSYNTHETIC_PROCESS	0.0109689	0.0619914	0.63086	1.70146	5	16
GNF2_PA2G4	0.00321027	0.0301314	0.452176	1.70113	1	78
GO_TRANSCRIPTIONAL_REPRESSOR_ACTIVITY_RNA_POLYMERASE_II_TRANSCRIPTION_REGULATORY_REGION_SEQUENCE_SPECIFIC_BINDING	0.00158228	0.02584	0.434042	1.70064	0	101
GSE17974_1H_VS_72H_UNTREATED_IN_VITRO_CD4_TCELL_UP	0.00143678	0.02584	0.405461	1.70042	0	158
GSE46606_UNSTIM_VS_CD40L_IL2_IL5_DAY3_STIMULATED_BCELL_DN	0.001443	0.02584	0.40839	1.70022	0	150
REACTOME_PEPTIDE_LIGAND_BINDING_RECEPTORS	0.010453	0.0596826	0.572409	1.70009	5	22
MUELLER_COMMON_TARGETS_OF_AML_FUSIONS_DN	0.012939	0.0689104	0.618053	1.69924	6	17
GERHOLD_ADIPOGENESIS_UP	0.00696864	0.0456765	0.533536	1.69873	3	33
GSE10239_MEMORY_VS_KLRG1INT_EFF_CD8_TCELL_DN	0.00142045	0.02584	0.398589	1.69739	0	176
REACTOME_RIG_I_MDA5_MEDIATED_INDUCTION_OF_IFN_ALPHA_BETA_PATHWAYS	0.00668896	0.0442787	0.478415	1.69708	3	55
PDGF_UP.V1_UP	0.0030303	0.0301314	0.419783	1.69665	1	116
GSE20366_EX_VIVO_VS_DEC205_CONVERSION_NAIVE_CD4_TCELL_UP	0.00149701	0.02584	0.417804	1.69636	0	122
GSE7219_UNSTIM_VS_LPS_AND_ANTI_CD40_STIM_DC_DN	0.00149254	0.02584	0.418623	1.69626	0	120
GO_RESPONSE_TO_MOLECULE_OF_BACTERIAL_ORIGIN	0.00143678	0.02584	0.404939	1.69625	0	157
GSE15330_LYMPHOID_MULTIPOTENT_VS_GRANULOCYTE_MONOCYTE_PROGENITOR_UP	0.00148588	0.02584	0.414309	1.69611	0	131
ONDER_CDH1_TARGETS_1_DN	0.00157978	0.02584	0.42824	1.6957	0	107
BIDUS_METASTASIS_UP	0.00141643	0.02584	0.394972	1.69422	0	191
GSE25085_FETAL_BM_VS_ADULT_BM_SP4_THYMIC_IMPLANT_DN	0.0014556	0.02584	0.409217	1.69416	0	146
WANG_METHYLATED_IN_BREAST_CANCER	0.010453	0.0596826	0.57032	1.69389	5	22
GSE17812_WT_VS_THPOK_KO_MEMORY_CD8_TCELL_DN	0.001443	0.02584	0.406058	1.69301	0	152
GSE32901_TH1_VS_TH17_NEG_CD4_TCELL_DN	0.00492611	0.0375929	0.470146	1.69203	2	60
GSE360_L_MAJOR_VS_B_MALAYI_LOW_DOSE_DC_UP	0.00147929	0.02584	0.414781	1.69184	0	127
GO_NUCLEOTIDE_EXCISION_REPAIR_DNA_GAP_FILLING	0.0103986	0.0594997	0.560521	1.69075	5	24
GSE42021_TCONV_PLN_VS_CD24LO_TCONV_THYMUS_DN	0.00150376	0.02584	0.415236	1.69034	0	129
GO_REGULATION_OF_EPIDERMIS_DEVELOPMENT	0.0085034	0.052729	0.542472	1.69011	4	28
GSE20500_CTRL_VS_RETINOIC_ACID_TREATED_CD4_TCELL_DN	0.00302572	0.0301314	0.417425	1.68941	1	117
GSE24634_IL4_VS_CTRL_TREATED_NAIVE_CD4_TCELL_DAY7_UP	0.00143678	0.02584	0.403291	1.68935	0	157
GO_NEGATIVE_REGULATION_OF_I_KAPPAB_KINASE_NF_KAPPAB_SIGNALING	0.00694444	0.0455403	0.516727	1.68917	3	37
GO_MEIOTIC_CELL_CYCLE	0.00149701	0.02584	0.41681	1.68801	0	113
GSE20152_SPHK1_KO_VS_WT_HTNFA_OVERXPRESS_ANKLE_UP	0.00149477	0.02584	0.412316	1.68768	0	132
GO_REGULATION_OF_DNA_REPLICATION	0.00302572	0.0301314	0.416983	1.68762	1	117
GSE22103_UNSTIM_VS_LPS_STIM_NEUTROPHIL_UP	0.00141643	0.02584	0.398664	1.68742	0	167
GSE29949_CD8_POS_DC_SPLEEN_VS_MONOCYTE_BONE_MARROW_DN	0.00145138	0.02584	0.406956	1.68711	0	147
BIOCARTA_MITOCHONDRIA_PATHWAY	0.0106572	0.0604603	0.576715	1.687	5	21
GSE16522_ANTI_CD3CD28_STIM_VS_UNSTIM_NAIVE_CD8_TCELL_UP	0.00148588	0.02584	0.412002	1.68666	0	131
GSE37416_CTRL_VS_12H_F_TULARENSIS_LVS_NEUTROPHIL_DN	0.001443	0.02584	0.405005	1.68612	0	150
GSE40274_CTRL_VS_FOXP3_AND_IRF4_TRANSDUCED_ACTIVATED_CD4_TCELL_UP	0.00323102	0.0301314	0.44453	1.6857	1	83
GSE37416_0H_VS_6H_F_TULARENSIS_LVS_NEUTROPHIL_DN	0.00287356	0.0301314	0.401321	1.68486	1	160
REACTOME_IMMUNOREGULATORY_INTERACTIONS_BETWEEN_A_LYMPHOID_AND_A_NON_LYMPHOID_CELL	0.0085034	0.052729	0.540701	1.68459	4	28
GSE3982_DC_VS_TH2_DN	0.00287356	0.0301314	0.401123	1.68437	1	161
GSE13411_IGM_MEMORY_BCELL_VS_PLASMA_CELL_DN	0.00149701	0.02584	0.415898	1.68431	0	113
GSE24081_CONTROLLER_VS_PROGRESSOR_HIV_SPECIFIC_CD8_TCELL_UP	0.0014881	0.02584	0.413816	1.68411	0	124
GNF2_BUB1	0.00692042	0.0454721	0.545447	1.68262	3	26
COULOUARN_TEMPORAL_TGFB1_SIGNATURE_UP	0.00319489	0.0301314	0.448752	1.68257	1	75
GSE16450_IMMATURE_VS_MATURE_NEURON_CELL_LINE_DN	0.00143472	0.02584	0.403158	1.6824	0	151
GNF2_MSH6	0.0052356	0.0387724	0.534896	1.6823	2	31
GSE26290_CTRL_VS_AKT_INHIBITOR_TREATED_ANTI_CD3_AND_IL2_STIM_CD8_TCELL_UP	0.00159236	0.02584	0.431769	1.68221	0	100
MODULE_17	0.00131234	0.02584	0.370196	1.68141	0	312
GO_TRANSCRIPTION_FACTOR_ACTIVITY_RNA_POLYMERASE_II_DISTAL_ENHANCER_SEQUENCE_SPECIFIC_BINDING	0.00680272	0.044765	0.494146	1.68115	3	45
GSE19401_PLN_VS_PEYERS_PATCH_FOLLICULAR_DC_DN	0.002886	0.0301314	0.39984	1.68102	1	164
GSE2128_C57BL6_VS_NOD_THYMOCYTE_UP	0.00144092	0.02584	0.40187	1.68065	0	155
GSE37532_WT_VS_PPARG_KO_LN_TCONV_DN	0.00145138	0.02584	0.405388	1.68061	0	147
MODULE_544	0.00694444	0.0455403	0.514025	1.68034	3	37
MOHANKUMAR_TLX1_TARGETS_DN	0.00496689	0.0376884	0.460357	1.68005	2	66
GSE25087_TREG_VS_TCONV_ADULT_UP	0.00144092	0.02584	0.404572	1.67959	0	148
HORIUCHI_WTAP_TARGETS_UP	0.00284091	0.0301314	0.394285	1.67906	1	176
MULLIGHAN_NPM1_MUTATED_SIGNATURE_2_UP	0.00318471	0.0301314	0.430892	1.67879	1	100
GSE37416_12H_VS_48H_F_TULARENSIS_LVS_NEUTROPHIL_UP	0.002886	0.0301314	0.39924	1.6785	1	164
MODULE_481	0.00868056	0.0536031	0.510437	1.67644	4	38
GSE22589_SIV_VS_HIV_AND_SIV_INFECTED_DC_UP	0.00160256	0.02584	0.431771	1.67637	0	98
GSE7852_TREG_VS_TCONV_FAT_UP	0.00147493	0.02584	0.407173	1.67611	0	143
GSE22886_DAY1_VS_DAY7_MONOCYTE_IN_CULTURE_UP	0.00146628	0.02584	0.406509	1.67517	0	141
GSE11386_NAIVE_VS_MEMORY_BCELL_UP	0.002886	0.0301314	0.398375	1.67486	1	164
GSE24634_NAIVE_CD4_TCELL_VS_DAY7_IL4_CONV_TREG_DN	0.00141643	0.02584	0.392483	1.67444	0	181
GSE25085_FETAL_BM_VS_ADULT_BM_SP4_THYMIC_IMPLANT_UP	0.00144092	0.02584	0.400262	1.67393	0	155
GO_NECROPTOTIC_PROCESS	0.0164534	0.0808241	0.620396	1.67324	8	16
NAKAYAMA_SOFT_TISSUE_TUMORS_PCA2_UP	0.00664452	0.0441159	0.469484	1.67322	3	56
GO_REGULATION_OF_RESPONSE_TO_DNA_DAMAGE_STIMULUS	0.00299401	0.0301314	0.41312	1.67306	1	113
GSE360_HIGH_DOSE_B_MALAYI_VS_M_TUBERCULOSIS_MAC_DN	0.00147929	0.02584	0.410002	1.67235	0	127
REACTOME_TAK1_ACTIVATES_NFKB_BY_PHOSPHORYLATION_AND_ACTIVATION_OF_IKKS_COMPLEX	0.0127042	0.0685162	0.589319	1.67157	6	19
chr11q22	0.0124334	0.0674927	0.571416	1.6715	6	21
GSE16266_LPS_VS_HEATSHOCK_AND_LPS_STIM_MEF_DN	0.00287356	0.0301314	0.397606	1.67147	1	163
GO_RESPONSE_TO_ALKALOID	0.00651466	0.0437656	0.460069	1.67141	3	63
SANA_TNF_SIGNALING_UP	0.00822368	0.0512807	0.481525	1.67127	4	48
GSE3039_ALPHAALPHA_CD8_TCELL_VS_B2_BCELL_DN	0.00149477	0.02584	0.408214	1.67089	0	132
GSE6259_33D1_POS_VS_DEC205_POS_FLT3L_INDUCED_SPLENIC_DC_UP	0.00315457	0.0301314	0.422142	1.67049	1	106
GSE25088_IL4_VS_IL4_AND_ROSIGLITAZONE_STIM_STAT6_KO_MACROPHAGE_DAY10_DN	0.00147929	0.02584	0.405908	1.67039	0	140
MODULE_525	0.00675676	0.0445725	0.475253	1.66973	3	53
LEONARD_HYPOXIA	0.00865052	0.0534672	0.526504	1.6696	4	32
GSE23321_CD8_STEM_CELL_MEMORY_VS_EFFECTOR_MEMORY_CD8_TCELL_DN	0.00286944	0.0301314	0.394143	1.66935	1	171
GSE19888_ADENOSINE_A3R_ACT_VS_A3R_ACT_WITH_A3R_INH_PRETREATMENT_IN_MAST_CELL_UP	0.00287356	0.0301314	0.397538	1.66898	1	160
GSE44649_NAIVE_VS_ACTIVATED_CD8_TCELL_MIR155_KO_DN	0.00286944	0.0301314	0.394038	1.66891	1	171
GO_RESPONSE_TO_MECHANICAL_STIMULUS	0.00318979	0.0301314	0.425342	1.66847	1	103
HIRSCH_CELLULAR_TRANSFORMATION_SIGNATURE_UP	0.00143472	0.02584	0.391418	1.66844	0	183
SHAFFER_IRF4_MULTIPLE_MYELOMA_PROGRAM	0.0119048	0.0657202	0.535424	1.66815	6	28
GO_REGULATION_OF_INFLAMMATORY_RESPONSE	0.00299401	0.0301314	0.411802	1.66772	1	113
ATACTGT,MIR-144	0.00148588	0.02584	0.406352	1.66766	0	134
REACTOME_DOUBLE_STRAND_BREAK_REPAIR	0.0121951	0.0667428	0.561424	1.66746	6	22
HALLMARK_HYPOXIA	0.00296296	0.0301314	0.409	1.66746	1	126
BROWNE_HCMV_INFECTION_14HR_UP	0.00149477	0.02584	0.407098	1.66739	0	133
BURTON_ADIPOGENESIS_1	0.0121739	0.066654	0.546181	1.66716	6	25
GO_MITOTIC_SPINDLE_ORGANIZATION	0.00656814	0.043893	0.46316	1.66689	3	60
MODULE_198	0.00134228	0.02584	0.371561	1.66682	0	272
GSE2706_UNSTIM_VS_8H_LPS_DC_DN	0.0014881	0.02584	0.409522	1.66663	0	124
GO_EMBRYONIC_HEART_TUBE_MORPHOGENESIS	0.0052356	0.0387724	0.529823	1.66635	2	31
GSE17301_CTRL_VS_48H_ACD3_ACD28_IFNA5_STIM_CD8_TCELL_DN	0.00284495	0.0301314	0.393586	1.66544	1	168
E2F1_UP.V1_UP	0.0014556	0.02584	0.402226	1.66522	0	146
GSE29614_DAY3_VS_DAY7_TIV_FLU_VACCINE_PBMC_DN	0.002886	0.0301314	0.399319	1.66491	1	152
GSE40274_SATB1_VS_FOXP3_AND_SATB1_TRANSDUCED_ACTIVATED_CD4_TCELL_DN	0.00650407	0.0437656	0.455842	1.66456	3	65
GSE19923_HEB_KO_VS_HEB_AND_E2A_KO_DP_THYMOCYTE_DN	0.00145138	0.02584	0.401505	1.66451	0	147
GSE7548_NAIVE_VS_DAY7_PCC_IMMUNIZATION_CD4_TCELL_DN	0.00287356	0.0301314	0.396377	1.66444	1	161
GSE42021_TREG_VS_TCONV_PLN_UP	0.001443	0.02584	0.399713	1.66409	0	150
DORN_ADENOVIRUS_INFECTION_12HR_DN	0.013913	0.071728	0.555031	1.66364	7	23
[truncated: 12,215 more rows]

## Sheet: DB vs DS
Supplementary Table 2d: GSEA Comparing Tumor Cells from the Spleen (S) and bone marrow (B) of Doxorubicin (D) treated mice engrafted with DFBL-20954. Positive enrichment scores indicate gene sets expressed higher in BM as compared to spleen determined by the ordering of the rank ordered differential expression lists.
[truncated: 13,340 more rows]

[truncated: 3 more sheets: DB vs VB, DS vs VS, VB vs VS]
