# Supplementary material for: Performativity and National Identity: Japan’s Domestic Policies
Source: Oxford University Press journal article supplement (doi:10.1158/2159-8290.cd-18-1393), 2007-01-01
Supplement: 21598290cd181393-sup-212867_2_supp_5481624_pq8jqx.xlsx [file 21598290cd181393-sup-212867_2_supp_5481624_pq8jqx.xlsx]

## Sheet: 3A
Supplementary Table 3a: RNA-seq normalized counts of bone marrow macrophages from Unengrafted (WT), PBS (V), Alemtuzumab (A), Doxorubicin (D), Cyclophosphamide (CT) or Cyclophosphamide + Alemtuzumab (Combo) treated DFBL-69487 (A) and DFBL-20954 (2) bearing mice. Macrophages were harvested 48 hours after treatment. Each column represents an individual mouse.
	Uneng 1	Uneng 1	Uneng 1	V1	V1	V1	A1	A1	A1	CT1	CT1	CT1	D1	D1	D1	Combo1	Combo1	Combo1	Uneng 2	Uneng 2	Uneng 2	V2	V2	V2	A2	A2	A2	CT2	CT2	CT2	D2	D2	D2	Combo2	Combo2	Combo2
0610007P14Rik	5.22226	5.10133	5.31236	5.6552	5.26469	6.46986	5.99107	5.71793	5.73664	5.51247	5.8056	5.38907	5.75207	5.34121	5.12134	5.96462	5.53399	5.90415	5.03445	4.69736	5.46595	5.57589	5.70101	5.56841	5.13152	5.74553	6.74156	5.74117	5.04486	5.37613	5.64868	5.87989	5.77524	5.75626	5.15271	5.53967
0610009B22Rik	5.98513	6.30916	6.29409	5.91783	5.68789	4.79038	6.10042	4.84815	5.82428	5.63904	5.94075	6.163	5.88714	5.76409	5.72572	5.85015	5.70627	5.99836	6.09051	6.19958	6.57081	5.59301	6.42145	6.1432	5.81362	5.97286	7.28712	5.83891	5.44893	6.16548	6.63423	6.37227	5.99209	6.18538	4.58789	5.74198
0610009L18Rik	2.56893	3.39539	4.04389	3.34301	3.23648	0	2.58698	4.07788	3.13628	2.7183	3.40777	3.22759	3.53343	3.46486	2.81498	3.25918	2.7817	3.35573	3.94373	4.3567	4.02934	3.07099	3.2726	3.72512	3.62661	2.47983	4.12042	3.61443	3.08222	3.04603	3.61333	2.80495	4.33408	3.37323	0	0
0610009O20Rik	2.56893	3.65975	3.50201	4.30391	3.49789	3.63588	1.80908	4.38262	3.95157	4.25838	3.58332	3.07679	3.53343	3.6202	3.70865	3.63604	3.46913	3.43488	3.03456	3.75192	2.71679	2.74309	3.1989	3.7903	3.0989	4.43313	2.42531	0	2.88794	2.93629	3.08614	2.80495	2.38069	3.37323	2.27544	2.17033
0610010B08Rik	2.56893	2.52637	2.81261	2.79611	2.50602	3.63588	2.58698	2.31378	2.11758	2.37454	3.40777	2.71766	1.86581	2.58994	2.68558	3.32923	3.57455	2.33377	2.53505	2.85522	3.22668	2.74309	2.85942	2.40013	2.96548	2.9759	2.42531	3.61443	3.78704	2.81751	3.7701	3.16744	2.38069	2.85626	3.64666	1.45976
0610010F05Rik	2.77204	3.39539	3.26422	3.46753	2.917	3.63588	3.0896	4.07788	2.11758	3.6043	3.88097	0.948355	1.86581	2.86313	3.32994	3.69029	3.23192	4.05203	3.32084	3.9099	2.86212	3.75799	2.53935	3.72512	3.33359	2.9759	1.67162	2.24769	3.25341	3.89857	2.82526	3.31941	2.61893	2.04288	4.03261	3.28587
0610010K14Rik	6.88888	7.1469	6.79677	7.02716	7.73172	7.29668	7.36654	7.82906	7.2622	6.81531	6.75645	7.23532	6.84201	7.37007	7.60131	7.33992	7.43547	7.18318	6.58977	6.77285	7.34562	7.1864	7.47677	7.2124	7.26553	7.46977	7.96677	6.38341	6.72203	7.47775	7.34474	7.31463	7.2788	7.20625	6.71038	6.88621
0610012G03Rik	6.94248	6.1992	6.985	6.63419	6.54958	6.46986	6.64264	7.20905	6.64496	6.45129	6.87934	6.70312	6.62724	6.68187	6.22212	6.71212	6.72709	6.91294	6.65987	6.67719	6.34212	6.74049	6.90554	6.70453	6.65668	7.18207	7.12715	5.83891	6.64721	7.02074	6.72643	6.54412	6.96461	6.65623	6.35174	6.9892
0610030E20Rik	6.08383	5.75227	6.5002	5.44408	5.49175	4.57665	4.77051	6.52908	5.6751	5.16515	5.3514	5.18299	6.01063	5.54888	5.62342	4.90966	5.18029	4.00092	6.01227	6.34501	5.97755	6.00483	6.01201	5.45236	5.43892	6.02451	6.17064	5.11865	4.61321	5.22098	5.95126	6.00847	6.01313	3.37323	4.98785	3.90738
0610037L13Rik	6.3289	6.12459	5.9569	5.80434	5.5791	4.32566	6.29701	5.60473	6.45666	5.32433	5.02617	5.94084	5.24892	5.56809	5.72572	5.82613	5.50761	5.45027	6.25808	6.43874	6.41461	6.17368	6.40516	6.28564	6.1108	5.47554	6.72675	5.52327	4.48159	5.77716	6.3741	6.38955	6.27069	4.86225	4.98785	5.48433
1110004E09Rik	4.17342	4.43509	3.96657	4.60439	3.3731	4.32566	4.70277	0	3.95157	5.37372	5.44533	4.70604	1.86581	4.39801	5.0961	4.99833	5.00279	5.31035	3.8864	3.57449	3.60267	4.76538	4.40706	4.66951	4.93139	4.43313	5.29462	2.24769	5.261	5.86962	4.40158	4.90418	4.63485	6.18538	3.11818	4.67293
1110004F10Rik	6.55218	6.6805	6.94524	6.54514	6.78822	6.19765	6.38609	5.60473	6.85376	6.83307	6.66179	6.76609	6.90704	6.76747	6.79279	6.67896	7.09805	6.93353	6.69369	6.70978	6.76816	6.73278	6.89391	6.71296	6.57887	6.85123	7.28712	6.82625	6.37783	6.78784	6.98826	6.62658	6.75578	6.05602	6.54218	6.62987
1110006O24Rik	1.48237	1.04127	1.84092	1.71668	0	0	1.17127	0	2.11758	2.37454	2.35611	0.948355	1.86581	1.52746	0.681414	1.53874	0.879325	0.657472	0.677619	1.73922	1.25914	1.4375	1.95901	2.5582	1.32971	2.47983	1.06547	2.24769	0	1.7739	1.74041	0.9986	1.73885	0	2.27544	0
1110008F13Rik	8.41732	8.65294	8.6546	7.92447	8.29305	7.66497	8.14324	7.90275	8.24696	8.37361	8.28246	8.49127	8.10879	8.19392	8.2105	7.93601	7.97737	8.15502	8.57169	8.91511	8.82621	8.32157	8.72165	8.42837	8.47848	8.18846	9.78616	8.08185	8.23793	8.13489	8.75891	8.74707	8.80424	7.69324	7.96979	8.23054
1110008L16Rik	2.67406	2.52637	0.895917	3.05619	0	0	0	0	2.11758	2.37454	2.69893	4.22217	3.53343	3.09273	2.54342	3.32923	2.37784	2.49019	2.37754	3.25923	1.62774	2.86087	3.34273	1.15214	2.47004	2.47983	1.06547	3.61443	3.99443	3.24325	2.09688	1.9979	2.72475	2.85626	3.11818	3.90738
1110008P14Rik	7.82117	8.02945	8.0791	7.02716	7.27166	6.58885	7.07654	6.46566	7.42057	6.68443	7.05351	7.25301	7.67697	7.33124	7.36287	6.39852	6.98786	6.84936	7.55951	7.68659	7.94812	7.06892	7.6458	7.53595	7.50674	7.92868	8.74618	6.87315	6.43232	6.77195	7.89162	8.08997	8.18888	6.46563	7.16122	6.60414
1110012L19Rik	5.37039	5.36477	4.69838	4.54909	5.03683	4.32566	3.75713	2.31378	4.90418	4.25838	4.96405	4.07077	5.14492	4.59818	4.78468	4.32583	4.75622	4.32563	4.95303	4.69736	5.16342	4.88142	4.72848	4.86373	4.52018	4.71044	5.3728	3.61443	4.41098	3.89857	5.05789	4.52088	5.11532	3.75304	4.80168	4.34035
1110019D14Rik	2.86379	2.76961	2.40707	2.47861	1.52216	2.26614	1.80908	2.31378	3.60077	4.25838	2.69893	2.23839	2.65294	2.43113	2.54342	3.39603	2.59385	1.72651	2.20069	2.50515	2.55516	1.71282	2.85942	2.83028	2.00972	4.27152	3.28434	0	2.07076	2.54586	3.23706	3.521	2.38069	2.85626	0	3.28587
1110020A21Rik	1.22993	3.2425	1.44445	3.27647	2.7261	0	2.86007	3.16087	1.68994	1.92238	3.40777	1.51568	0	1.81162	2.54342	2.64152	2.59385	2.75983	2.80632	3.00282	1.62774	1.71282	3.70412	2.5582	2.25816	3.34435	4.20834	3.0872	1.64803	1.49305	2.62079	2.31969	3.08417	3.37323	0	3.7284
1110032A03Rik	3.31764	4.03048	3.50201	2.79611	3.91088	4.57665	3.75713	3.16087	3.13628	3.9023	3.73981	3.48882	2.65294	3.9481	4.06147	2.74766	3.46913	3.50991	3.13643	3.75192	4.58455	4.13056	3.99287	2.83028	3.7124	4.94294	3.70281	3.0872	3.78704	3.89857	3.61333	3.31941	3.37167	3.75304	3.11818	3.52404
1110034G24Rik	4.1371	3.983	4.31741	3.92392	3.81818	2.26614	4.47804	5.03452	4.73357	3.4285	2.69893	3.98866	1.86581	3.9481	4.1622	3.45988	3.76476	3.94794	5.08629	4.86109	4.78015	3.49199	3.99287	3.85267	3.53539	3.88117	5.71051	3.99972	3.89446	4.30402	4.55315	4.45676	4.26559	2.04288	2.27544	3.28587
1110037F02Rik	4.93556	4.03048	4.96013	5.23223	4.76611	0	5.40324	5.19954	4.95684	4.85324	4.68478	5.02719	4.77859	5.12474	4.84653	4.99833	5.61036	5.33119	5.11153	5.07638	5.21846	5.46865	5.15605	5.1134	4.89516	4.57843	4.64633	6.09774	5.41325	4.99332	4.60958	5.08474	5.33175	4.69852	6.71038	4.57036
1110038B12Rik	4.93556	4.75072	5.46073	4.73401	5.46142	5.28923	5.77716	4.38262	5.73664	5.42146	4.75983	5.59733	5.03284	5.62424	5.28665	5.42355	5.72928	5.26774	5.48425	5.42941	4.91953	5.3528	5.57558	5.06153	4.89516	5.54792	6.21376	5.93044	5.79229	5.71205	6.06663	5.66968	5.47512	6.24595	3.64666	5.74198
1110038F14Rik	5.07646	4.56973	4.87805	5.0649	4.55253	5.14132	5.01357	4.07788	4.84952	4.92125	4.1276	5.62477	5.03284	5.09855	4.21005	5.35804	5.00279	5.10787	4.37736	5.17306	5.1062	5.06443	5.53122	5.13865	4.65629	5.23368	5.07834	3.0872	4.73382	5.57231	4.95274	5.28267	4.73956	4.69852	4.80168	5.02287
1110051M20Rik	2.56893	0.612609	1.84092	1.71668	0	0	0	0	0	2.37454	1.24689	1.92182	2.65294	1.52746	1.14236	2.11586	0	1.44993	1.13685	0	3.22668	1.94392	3.1989	2.02008	2.65474	3.88117	0	2.24769	1.64803	2.54586	2.50656	2.31969	1.92799	4.0534	0	2.17033
1110059E24Rik	4.37398	4.83335	4.5994	4.68355	5.19267	4.02161	4.1108	3.69104	4.54005	4.70677	4.75983	4.42309	4.07625	5.07188	4.42802	4.86319	4.92519	4.24007	5.18469	5.42941	4.88593	4.30696	4.67512	4.59849	4.36987	3.34435	5.29462	3.99972	3.08222	4.43083	5.17471	4.92803	5.07586	4.51379	4.03261	5.02287
1110059G10Rik	6.26302	5.73804	6.58025	5.70665	5.68789	5.86184	6.10042	6.17978	6.05918	5.37372	6.12236	5.7296	6.06863	6.24191	5.49412	6.20715	5.58535	5.43109	6.12809	6.24477	6.39085	5.81357	6.34663	5.51155	6.04618	6.12257	7.06962	5.52327	5.48375	5.62631	6.25532	6.17715	6.04413	6.65623	6.13229	5.78842
1110065P20Rik	3.76112	5.07892	4.96013	3.13342	3.81818	5.5461	4.63168	5.19954	3.13628	4.92125	5.14292	4.8982	3.15934	4.83865	4.42802	4.86319	4.75622	4.98175	5.44508	5.42941	4.85152	4.22146	5.07597	4.59849	4.61233	4.43313	6.3359	4.7679	4.5489	4.84937	5.15589	5.37231	5.05573	3.37323	4.80168	4.06658
1190002N15Rik	3.44193	3.59806	3.12881	3.96675	4.08013	2.26614	4.21174	0	2.94098	1.92238	3.40777	2.71766	3.83022	2.98249	2.93373	3.45988	2.59385	3.43488	3.55961	2.29207	2.55516	2.47405	3.1989	3.43021	2.65474	4.27152	3.92668	2.24769	4.73382	4.0111	2.62079	3.16744	3.30498	2.85626	4.03261	3.7284
1190007I07Rik	4.8484	4.98565	3.60766	4.73401	4.15784	4.02161	5.6748	3.69104	4.31649	3.9023	5.08573	4.65372	4.46974	4.30945	4.46792	5.34118	5.07643	5.26774	4.98068	4.86109	5.41973	5.22682	5.0342	4.98006	4.78066	4.83137	5.649	3.61443	4.5489	5.67837	5.81391	4.42359	4.90629	5.98672	4.58789	4.57036
1300002E11Rik	1.48237	2.06148	3.38801	2.35508	2.24623	2.26614	1.17127	4.07788	3.60077	2.7183	1.24689	2.23839	1.86581	2.25264	2.2086	2.84651	3.09687	2.49019	3.63116	4.05227	2.86212	3.16559	1.76835	3.43021	3.22101	2.47983	3.1127	3.0872	1.64803	3.148	1.74041	2.90446	2.91563	4.0534	2.27544	2.17033
1500011B03Rik	4.52214	4.43509	4.5994	4.36922	5.03683	4.02161	4.70277	4.84815	4.39492	4.98619	3.73981	4.94249	4.63242	4.74046	4.42802	4.79055	4.84318	4.40641	4.5349	4.3567	4.85152	4.50087	4.11812	3.91245	4.2602	4.94294	5.44696	3.0872	4.67477	4.62017	5.03746	4.55191	4.88362	5.37743	3.11818	5.09854
1500011K16Rik	6.26302	6.3565	6.44426	5.57442	6.03543	5.14132	6.69588	5.19954	5.57758	6.11617	6.47396	6.18159	5.82118	5.58705	5.55096	5.88546	6.27418	5.95874	6.39798	6.72049	6.35446	6.10372	6.42145	6.33016	5.8329	6.66851	6.79933	6.38341	5.99897	6.22503	6.8487	5.473	5.77524	6.35997	6.13229	5.02287
1500015A07Rik	1.48237	2.38741	3.12881	1.50051	0	3.10781	1.17127	0	2.94098	0	3.40777	0	2.65294	2.86313	2.2086	2.4025	0	2.1583	2.53505	2.85522	2.71679	2.61483	1.76835	1.78444	2.25816	0	2.09713	0	0	2.38808	2.24674	1.80535	2.50472	2.85626	0	3.28587
1600002H07Rik	2.86379	1.63974	0.895917	3.05619	2.50602	2.26614	2.58698	3.69104	3.60077	2.7183	2.69893	2.23839	3.15934	2.58994	1.49115	2.64152	3.09687	2.33377	3.48433	2.85522	1.62774	2.31803	2.53935	3.72512	3.33359	2.9759	2.09713	0	1.64803	2.93629	2.24674	3.24542	2.09517	0	4.03261	3.90738
1600002K03Rik	3.18163	4.36274	3.96657	3.63622	3.61274	3.63588	4.1108	4.07788	4.60748	4.54373	3.73981	4.2923	3.53343	4.30945	3.77378	4.81517	4.45864	3.94794	4.45828	4.46251	3.68313	3.8746	4.03584	3.85267	3.87004	2.47983	4.93107	4.7679	3.78704	4.11549	4.12012	4.35489	3.71765	3.37323	4.03261	3.90738
1600010M07Rik	3.10849	1.63974	2.81261	0.543356	2.50602	4.32566	2.58698	3.69104	2.71503	3.6043	1.24689	1.92182	1.86581	3.46486	2.93373	3.52102	2.59385	2.49019	2.37754	3.9099	2.86212	1.71282	0.56689	2.70065	1.70942	1.71772	3.43772	3.61443	2.66337	2.68807	2.72664	2.69807	2.91563	2.85626	0	2.64429
1600012H06Rik	5.13288	5.10133	5.11149	4.52062	4.15784	3.10781	4.77051	4.63408	4.6719	2.9957	4.33815	4.59942	4.77859	5.29584	5.17053	5.14149	5.04008	4.10139	5.78017	5.29265	5.86132	4.53671	4.77994	4.36169	5.25101	4.83137	6.35529	4.95391	4.67477	4.21283	5.09789	5.40666	5.51991	2.85626	4.03261	5.23891
1600014C10Rik	7.21056	7.22039	7.46435	7.10591	6.8942	7.02848	6.36433	6.75809	6.92157	6.85062	6.86241	6.70312	6.96927	7.2971	7.10897	6.87905	6.71562	6.7131	7.20825	7.50659	7.45851	6.93433	7.14023	7.31564	7.22961	7.01339	8.27233	6.5075	6.48483	7.06703	7.54612	7.68721	7.91757	6.61089	6.76236	7.00895
1600020E01Rik	4.43508	4.03048	4.99948	4.2355	3.49789	4.57665	4.39462	4.07788	3.72742	3.6043	3.20786	4.07077	4.63242	4.67107	4.21005	3.57968	3.67279	2.6313	5.20828	5.00812	4.88593	3.92956	4.59118	2.5582	1.70942	5.14313	4.0268	3.61443	3.08222	3.04603	4.30235	4.24527	4.23009	4.69852	3.64666	3.7284
1600029O15Rik	3.31764	3.39539	4.11728	3.46753	3.61274	4.02161	2.24984	4.07788	2.71503	1.92238	1.90558	2.49783	0	2.98249	2.54342	2.84651	3.35539	2.49019	3.4049	4.3567	2.71679	3.16559	3.47351	2.40013	3.0989	3.63759	3.81908	2.24769	2.88794	3.33259	3.6675	2.99755	3.55501	3.75304	2.27544	3.52404
1700001C19Rik	2.33247	2.23363	1.84092	2.69784	2.50602	3.10781	1.17127	3.69104	2.94098	2.7183	3.73981	3.6036	0	2.43113	2.00668	2.84651	1.42171	3.43488	2.20069	0.831486	3.33026	3.41705	0.972806	2.94923	2.25816	2.47983	2.69249	2.24769	3.54476	2.81751	2.82526	0.9986	2.38069	2.85626	0	2.64429
1700007L15Rik	2.33247	2.76961	2.15159	1.90464	0.953156	4.02161	1.80908	0	1.68994	2.37454	2.35611	1.51568	3.83022	2.25264	2.3857	2.26629	2.59385	1.9585	3.23158	3.13671	2.86212	3.07099	2.41466	2.40013	2.47004	3.34435	2.91784	0	2.39728	1.7739	3.49848	2.31969	3.16159	0	0	2.64429
1700008J07Rik	2.45554	0.612609	0.895917	3.34301	3.61274	0	3.28757	0	1.68994	2.37454	2.35611	0	0	2.86313	2.68558	2.26629	0.879325	2.33377	3.13643	2.85522	1.25914	3.25437	2.53935	2.5582	0.81292	3.63759	2.09713	2.24769	3.54476	3.148	0.554109	1.9979	1.92799	0	0	1.45976
1700010I14Rik	2.0495	2.65311	1.84092	2.59238	1.52216	2.26614	2.24984	0	2.11758	0	0	2.23839	0	2.43113	3.04344	2.26629	3.23192	2.98692	3.63116	3.00282	3.60267	3.49199	2.27817	3.7903	0	0	2.69249	3.0872	2.39728	1.14397	1.92963	1.32025	2.82334	0	0	1.45976
1700012B09Rik	0	1.37132	0.895917	2.21998	3.23648	4.32566	2.24984	3.16087	2.11758	1.92238	0	0	0	2.04892	2.00668	2.26629	0.879325	3.08833	0.677619	0	0.762784	2.61483	1.28923	0.688148	2.96548	2.47983	3.92668	0	1.64803	3.41672	2.72664	1.5831	1.92799	2.04288	3.64666	2.17033
1700015E13Rik	3.50028	3.53362	4.18712	2.9746	4.08013	4.32566	4.30608	4.38262	3.72742	3.9023	3.88097	3.9016	4.46974	4.16551	4.11272	4.02178	3.09687	3.50991	4.05198	4.05227	4.02934	4.22146	4.34007	3.96985	3.53539	5.39934	4.93107	3.0872	3.78704	4.34754	4.15845	3.69785	4.11802	2.04288	2.27544	8.21362
1700017B05Rik	3.55636	2.9777	3.38801	4.82993	4.76611	4.32566	4.39462	5.34761	4.46931	4.03101	5.4901	3.36411	5.14492	4.59818	4.30122	3.57968	4.51269	3.89293	3.8267	2.04197	3.75934	4.30696	3.94858	4.17903	4.20207	4.27152	2.09713	0	4.73382	4.25915	3.61333	3.75229	3.30498	3.75304	4.58789	4.34035
1700020I14Rik	6.82754	6.41133	7.20295	6.39642	6.70004	5.28923	6.52987	5.48189	6.15244	6.22781	6.06433	6.19995	6.32808	5.84507	6.63524	6.00798	5.94123	5.89018	6.75903	6.94701	7.03666	6.26198	6.1553	6.37335	6.34371	5.86367	7.14953	5.52327	5.95001	6.44132	6.48384	6.44017	6.74952	6.61089	4.98785	6.28592
1700020L24Rik	5.84582	6.40234	6.44426	6.33236	5.90628	4.97649	5.22152	6.25673	5.10419	3.76098	5.3514	5.18299	6.01063	5.07188	5.88157	4.68764	4.51269	5.00787	6.26934	6.25952	6.12886	6.67767	6.67354	6.35192	5.53623	5.14313	5.07834	3.61443	4.41098	4.30402	5.39941	5.81743	5.99209	4.30188	0	4.06658
1700021F05Rik	4.89264	4.1642	4.96013	5.02493	4.71561	4.02161	6.17731	3.16087	5.15014	5.59807	4.96405	5.62477	4.91131	5.12474	5.49412	5.71277	6.073	5.41166	4.57173	4.24252	4.62585	5.03967	5.11657	5.1134	5.73381	4.94294	6.05683	3.99972	5.61518	5.39699	4.90844	5.08474	4.66175	6.18538	5.55758	4.06658
1700025G04Rik	4.65649	4.77879	4.04389	4.33693	5.33329	4.57665	5.35991	5.19954	5.15014	4.25838	4.00955	4.42309	4.63242	5.09855	4.84653	5.17992	4.08328	4.69067	4.37736	3.47686	3.42689	4.13056	4.40706	4.12951	4.69895	2.47983	3.43772	2.24769	4.99746	4.58423	4.2677	3.08499	4.15635	5.26484	3.64666	4.45993
1700028B04Rik	4.55003	4.32516	5.03779	4.2355	4.66327	3.10781	4.47804	3.16087	4.39492	4.45474	4.75983	4.65372	4.91131	4.16551	4.21005	4.21918	3.23192	4.14911	4.5349	5.00812	4.70506	4.90903	4.61971	4.07823	4.52018	5.23368	6.05683	4.3035	4.33674	4.54739	4.81553	4.61202	4.73956	4.0534	4.03261	4.06658
1700030F18Rik	4.89264	4.88592	5.28077	5.23223	5.2994	5.6592	4.5569	3.16087	4.6719	3.4285	4.68478	4.94249	5.14492	5.2726	4.9628	4.99833	5.2456	5.08351	5.52238	5.6244	5.24521	5.13628	5.25029	4.7372	5.1925	5.14313	6.10344	4.5543	4.8977	4.84937	5.52209	4.92803	5.09573	5.26484	4.58789	4.45993
1700030K09Rik	2.19791	2.65311	1.44445	2.79611	0	0	3.0896	0	1.68994	1.26017	1.24689	0.948355	0	1.17325	1.77182	1.2804	2.37784	2.1583	2.80632	2.50515	1.92107	1.09694	2.41466	1.50266	1.32971	2.47983	1.06547	0	2.07076	2.93629	1.74041	1.5831	0.952392	2.85626	3.11818	1.45976
1700034P13Rik	2.56893	2.65311	2.81261	1.90464	2.50602	0	4.00227	2.31378	2.44702	4.14917	2.97572	3.6036	2.65294	2.86313	3.56886	4.02178	4.01	4.14911	2.67705	3.37214	3.22668	2.96975	3.03912	2.70065	2.47004	4.27152	3.1127	3.61443	4.61321	4.72289	4.88577	3.5824	4.19369	5.14271	4.98785	4.57036
1700037C18Rik	2.77204	1.63974	2.15159	2.47861	0.953156	0	2.58698	0	1.68994	1.26017	1.24689	0.948355	0	1.17325	1.49115	2.64152	0.879325	2.49019	2.53505	3.13671	2.16472	1.71282	1.76835	1.50266	2.65474	1.71772	0	0	0	1.49305	2.09688	2.58263	1.92799	2.04288	0	1.45976
1700037H04Rik	6.22892	6.70265	6.05355	6.29082	6.2279	6.12073	6.36433	5.48189	6.49277	5.46768	6.35798	5.8965	5.95021	6.47351	6.42833	5.43947	5.68288	6.03693	6.45824	5.77575	6.35446	6.66153	6.60385	6.93819	6.63487	6.12257	6.17064	6.01651	4.94844	6.07775	6.39833	6.44017	6.05432	6.18538	5.55758	6.00051
1700042O10Rik	2.0495	1.63974	1.44445	0.543356	1.92915	4.02161	2.24984	3.16087	2.71503	2.7183	2.35611	2.49783	3.15934	2.43113	0.681414	2.26629	0	2.1583	3.94373	4.11851	2.86212	1.71282	2.53935	2.5582	2.81846	4.83137	3.70281	4.3035	3.08222	3.77651	2.24674	2.16775	2.72475	3.75304	3.11818	2.17033
1700047I17Rik2	5.56063	5.88734	5.76472	5.31743	4.71561	5.28923	5.01357	5.34761	4.90418	5.16515	5.69521	5.28971	4.91131	4.95998	4.9628	5.56091	5.48074	5.35173	5.54108	5.37625	5.1912	5.03967	5.79155	5.23545	5.22206	5.23368	5.41036	6.44679	5.33913	5.74497	5.92926	5.73872	5.3149	5.67046	5.15271	5.30429
1700047M11Rik	6.96854	6.81537	7.23628	5.82776	6.5922	5.86184	5.77716	7.16979	6.78261	6.1449	5.76973	5.62477	7.67697	7.18335	7.04445	4.97667	6.1771	5.33119	7.29342	7.57306	7.28245	5.85674	7.0062	6.5902	7.02687	6.02451	8.11061	6.01651	5.41325	5.53515	7.21889	7.75876	7.79536	4.69852	6.41805	5.694
1700052K11Rik	3.18163	1.86596	2.40707	3.13342	3.23648	4.02161	1.17127	2.31378	2.71503	3.4285	3.40777	0.948355	3.53343	1.52746	1.77182	2.26629	2.7817	2.75983	3.03456	4.24252	2.37311	2.96975	3.12122	2.83028	0.81292	0	2.69249	3.0872	1.64803	3.04603	2.38249	4.04176	3.49644	0	2.27544	3.00046
1700063O14Rik	0.534577	2.06148	4.18712	1.90464	2.24623	0	0	2.31378	1.07944	1.26017	0	2.23839	0	0	2.68558	0.965476	0	0.657472	0.677619	2.04197	1.25914	0	0.56689	0	2.00972	0	0	3.0872	2.88794	0.682524	0	0.9986	0.553399	3.37323	0	1.45976
1700066M21Rik	2.56893	3.2425	2.97936	3.34301	1.52216	0	3.61693	3.69104	3.84384	3.22827	2.35611	2.90837	3.53343	2.25264	2.93373	1.9479	2.7817	2.33377	3.13643	3.00282	2.37311	2.86087	3.53471	2.02008	2.65474	2.47983	3.70281	3.0872	2.66337	2.54586	2.62079	1.80535	3.00236	3.37323	3.11818	0
1700080N15Rik	2.0495	1.04127	2.62404	2.07091	1.52216	2.26614	2.24984	0	2.11758	2.7183	1.24689	2.23839	0	1.81162	2.2086	1.53874	1.81498	1.10744	1.13685	1.3556	0.762784	1.94392	2.27817	0.688148	2.00972	4.08951	2.69249	2.24769	1.04755	0.682524	1.92963	0	1.26461	0	2.27544	3.00046
1700086O06Rik	2.19791	1.63974	2.97936	1.90464	1.92915	2.26614	2.58698	2.31378	2.44702	3.22827	1.90558	2.23839	0	2.04892	0.681414	3.25918	3.23192	2.98692	2.37754	1.73922	1.62774	2.14307	2.95207	2.40013	2.96548	0	2.42531	2.24769	1.64803	3.83883	3.6675	3.24542	3.08417	3.37323	2.27544	3.28587
1700093K21Rik	2.86379	2.52637	2.81261	1.90464	2.24623	0	2.58698	0	2.11758	2.37454	1.24689	3.22759	2.65294	2.04892	1.49115	2.4025	2.59385	2.33377	2.53505	3.25923	2.16472	1.94392	2.1274	2.40013	1.70942	4.27152	2.69249	3.99972	2.88794	2.00889	1.26591	1.9979	2.72475	2.85626	3.11818	3.00046
1700094D03Rik	2.86379	2.38741	0	0	1.92915	3.63588	0	0	1.68994	1.92238	0	1.92182	1.86581	2.04892	0	1.53874	2.37784	1.72651	2.92495	4.05227	2.37311	1.09694	2.53935	1.50266	1.32971	0	2.09713	3.0872	0	2.21091	2.24674	1.32025	1.73885	3.37323	0	3.28587
1700096K18Rik	4.27718	3.65975	4.11728	3.52598	3.3731	4.02161	3.75713	5.03452	2.94098	3.76098	1.24689	3.22759	0	4.83865	4.30122	3.10797	3.57455	3.7762	4.05198	5.00812	4.49823	4.82457	4.30537	4.48494	4.20207	2.9759	4.64633	3.99972	2.88794	2.68807	3.61333	3.95158	4.60745	2.04288	2.27544	4.06658
1700097N02Rik	6.05492	5.73804	5.76472	6.33236	5.92862	5.5461	4.77051	5.19954	4.6719	5.04834	4.60561	4.98546	5.75207	5.2726	5.80575	4.83938	4.5648	4.62468	5.27681	5.32106	6.1573	6.61199	6.31209	5.30402	4.89516	5.61684	5.85371	4.7679	5.58343	5.43783	6.02574	5.73872	6.02354	2.04288	4.3368	3.90738
1700102H20Rik	2.33247	2.38741	2.40707	1.24615	3.08557	2.26614	2.86007	3.16087	1.68994	1.26017	1.24689	2.49783	0	0.70274	1.14236	2.93903	1.42171	2.87784	0.677619	2.85522	0.762784	3.07099	2.76042	1.15214	2.81846	3.88117	3.28434	0	1.64803	2.81751	2.24674	3.31941	2.50472	3.37323	0	1.45976
1700105P06Rik	1.88405	1.04127	2.62404	1.90464	1.52216	0	1.17127	2.31378	1.68994	0	0	2.71766	0	2.04892	1.49115	0.965476	1.42171	0.657472	2.53505	0.831486	1.62774	1.94392	1.28923	2.02008	2.25816	0	3.28434	3.0872	2.07076	2.21091	2.09688	1.32025	2.38069	0	0	0
1700109H08Rik	1.48237	2.38741	1.84092	2.21998	2.24623	0	0	0	2.71503	0	0	1.51568	0	2.25264	1.14236	1.75778	1.42171	1.10744	2.20069	1.3556	2.37311	1.4375	1.76835	0.688148	1.32971	2.47983	0	5.11865	1.04755	1.14397	1.26591	1.32025	1.52113	0	0	2.17033
1700112E06Rik	3.89763	5.14512	4.4369	4.2355	3.99798	4.57665	4.30608	0	3.13628	3.4285	3.58332	4.14845	4.28637	2.98249	4.46792	3.18555	4.08328	3.27199	4.24678	3.98284	4.91953	4.30696	4.53238	3.65685	4.42174	3.88117	3.43772	3.61443	3.08222	2.93629	3.81878	3.80475	4.15635	2.04288	3.64666	4.34035
1700113A16Rik	1.48237	2.38741	0.895917	2.35508	2.50602	0	1.80908	0	0	3.4285	0	0.948355	0	2.25264	0	2.4025	0	2.6313	0.677619	2.04197	3.33026	3.07099	2.53935	2.40013	1.32971	1.71772	0	0	2.39728	2.21091	1.26591	1.9979	2.38069	2.85626	4.03261	0
1700123O20Rik	7.62207	7.84591	7.92412	7.39569	7.27166	6.69877	6.7132	6.64813	7.32364	7.27124	6.99258	7.06548	7.24555	7.22025	7.04445	6.71212	6.83712	6.43367	7.63542	8.11348	8.10238	7.44401	8.13511	7.73533	7.73399	7.13585	8.41311	6.56576	5.64625	6.25961	7.66073	7.81099	7.62131	6.78429	6.41805	6.46812
1810006J02Rik	3.25124	2.65311	3.38801	2.69784	2.50602	2.26614	2.86007	0	3.30827	0	2.35611	3.6036	3.15934	2.43113	1.14236	0.562039	1.42171	1.44993	2.37754	3.37214	2.37311	3.41705	3.70412	2.40013	3.0989	0	0	0	0	0	3.37368	2.69807	3.30498	0	0	2.64429
1810008I18Rik	1.48237	2.8774	2.62404	4.04878	1.52216	0	0	0	0	1.26017	0	0.948355	0	0	1.77182	0.965476	0	0.657472	0	1.73922	3.96643	3.8746	2.76042	3.65685	1.70942	0	0	0	0	1.49305	1.74041	1.5831	2.09517	2.04288	0	0
1810009A15Rik	6.94773	7.06946	7.70356	6.92226	7.19999	6.69877	7.17982	7.12944	6.89483	7.10573	6.96112	7.32169	7.05784	6.6994	6.92051	6.84956	7.12433	7.17744	7.20825	7.71898	7.1891	7.05045	7.22622	6.98766	7.01003	7.33308	8.02846	6.87315	7.21188	7.09922	7.67732	7.30556	7.44673	7.81819	6.35174	7.08533
1810011H11Rik	2.33247	4.03048	3.38801	4.2355	2.917	2.26614	3.75713	4.38262	3.95157	3.6043	1.90558	2.71766	3.83022	3.54462	4.11272	3.25918	2.59385	3.58123	4.20049	3.66593	3.83172	4.50087	4.50206	4.76989	3.0989	1.71772	3.43772	0	2.39728	1.49305	3.55705	3.64128	3.81671	3.37323	0	0
1810013L24Rik	4.70692	4.53723	4.49312	4.16368	4.71561	3.63588	3.8849	4.38262	4.14554	4.62755	4.43292	3.9016	3.53343	4.16551	3.70865	4.1818	4.15302	4.55553	5.38425	5.45528	5.29726	4.46412	4.43943	4.66951	4.2602	4.08951	4.12042	5.63633	4.08791	4.84937	4.66389	5.06337	4.81338	4.30188	4.58789	4.57036
1810014B01Rik	4.60424	3.88309	4.18712	3.52598	3.71911	4.02161	4.21174	3.16087	2.71503	3.22827	3.73981	3.48882	3.15934	3.76042	3.56886	3.52102	3.85122	4.00092	3.99887	3.37214	3.51745	4.30696	4.26981	3.34599	3.43802	3.34435	1.06547	3.61443	3.25341	4.38979	4.12012	3.69785	3.95361	3.37323	3.11818	3.90738
1810022K09Rik	7.41396	7.4163	7.6916	7.26452	7.13422	6.89629	7.53184	6.39932	7.10775	7.77253	7.60462	7.784	7.45575	7.59746	7.40972	7.56346	7.83079	7.97142	7.77622	8.0597	7.91101	7.33628	7.53409	7.36996	7.34826	7.95553	7.92845	7.12641	7.31215	8.05181	8.26104	7.42348	7.82244	7.64906	7.23665	7.7096
1810026B05Rik	7.36377	7.05231	7.10712	6.91134	6.42937	7.11033	6.60602	6.86027	6.5624	6.2007	5.90813	6.02563	6.46395	6.84827	6.59076	6.09098	6.65681	6.15851	7.2543	7.51276	6.80458	6.04271	7.18863	6.66162	5.88925	6.73202	6.03295	6.56576	6.50191	6.01166	7.01462	7.07937	6.56236	6.30409	5.87336	6.15026
1810026J23Rik	3.89763	4.20615	3.79825	4.00835	4.66327	3.63588	4.30608	3.16087	4.31649	3.6043	4.89914	3.98866	1.86581	4.52141	4.34474	4.54774	4.40247	4.19531	3.4049	3.37214	4.49823	3.41705	3.75644	4.02506	3.87004	1.71772	3.92668	4.5543	4.41098	3.95593	4.2322	3.85537	3.66545	4.0534	3.64666	4.06658
1810030O07Rik	4.43508	4.77879	4.87805	4.709	5.03683	5.42337	4.63168	4.07788	4.73357	4.78186	4.60561	5.32359	5.34593	4.52141	5.0961	4.68764	5.42545	4.55553	4.6427	5.26367	4.58455	4.30696	4.67512	4.89371	4.78066	4.71044	4.64633	4.5543	5.22028	3.83883	4.6903	5.12656	4.68816	5.57924	4.58789	4.20995
1810032O08Rik	3.50028	2.65311	3.38801	2.9746	3.71911	3.63588	1.17127	0	1.68994	1.26017	1.24689	3.36411	3.53343	2.98249	3.24061	1.9479	2.7817	2.33377	1.9991	2.85522	2.99415	3.25437	2.85942	3.43021	2.47004	4.27152	2.09713	0	3.25341	2.21091	2.38249	1.5831	2.61893	3.37323	0	2.64429
1810037I17Rik	9.70062	9.83452	10.2556	9.53512	9.52875	8.97719	9.05837	8.98136	9.13459	8.57705	8.99575	9.21011	9.69027	9.2221	9.42251	8.74244	8.5556	8.78247	9.8084	10.1438	10.028	9.56689	10.1966	9.77521	9.23874	9.04305	10.3154	8.35395	8.11561	8.5664	9.8458	9.5441	9.64306	8.61133	7.62142	8.24726
1810041H14Rik	0.923746	1.04127	1.84092	1.90464	3.23648	0	2.24984	2.31378	2.11758	1.26017	2.69893	0.948355	1.86581	2.04892	2.00668	1.2804	1.81498	2.1583	1.13685	2.69078	1.25914	2.47405	2.41466	1.15214	3.22101	1.71772	2.42531	0	2.07076	3.148	3.16357	2.31969	2.24498	2.85626	2.27544	3.00046
1810043G02Rik	2.77204	2.38741	0.895917	3.05619	4.55253	0	2.86007	3.16087	3.30827	3.22827	2.35611	3.07679	4.07625	2.25264	2.93373	2.84651	3.46913	2.75983	2.92495	3.47686	2.37311	3.56322	2.76042	2.40013	3.43802	3.63759	3.57635	3.0872	4.5489	2.54586	2.82526	3.75229	3.55501	4.51379	4.58789	1.45976
1810044D09Rik	2.45554	2.23363	3.12881	3.34301	4.36864	0	1.80908	2.31378	1.07944	0	1.90558	2.49783	2.65294	2.73299	1.49115	2.93903	2.12369	2.6313	3.23158	3.9099	2.99415	1.94392	2.53935	1.78444	3.0989	3.34435	2.69249	3.0872	3.08222	3.148	2.91756	2.31969	3.16159	2.04288	2.27544	3.28587
1810055G02Rik	5.66634	5.83482	5.78738	5.12286	5.66145	5.14132	3.75713	5.48189	5.23788	4.45474	4.83116	4.70604	6.66533	4.95998	5.45495	4.45678	4.5648	3.83575	5.59575	5.48068	5.21846	5.11273	5.6466	5.75957	5.43892	2.9759	5.3728	2.24769	3.67098	3.77651	5.35058	5.44021	5.53454	3.37323	4.03261	1.45976
1810058I24Rik	8.90154	8.86258	9.15913	8.21389	8.60542	9.12234	8.47815	8.4857	8.87549	8.3857	7.8732	8.34632	8.79868	8.747	8.52141	8.20413	8.02929	8.14916	8.82915	8.94964	9.05887	8.59665	8.53207	8.41034	8.85134	8.82736	9.34707	7.55812	8.30274	8.68988	8.49997	8.79649	9.03648	8.26128	8.03463	7.7687
1810062O18Rik	2.45554	3.07147	2.62404	1.71668	1.92915	2.26614	2.24984	4.07788	4.05181	0	2.35611	2.71766	2.65294	2.43113	2.93373	2.11586	2.59385	1.9585	2.67705	3.00282	2.86212	2.31803	3.47351	3.50978	3.43802	2.47983	3.57635	0	2.07076	2.21091	3.23706	3.08499	2.72475	3.37323	0	0
2010001A14Rik	1.22993	2.23363	0	1.24615	0.953156	0	2.58698	0	1.07944	0	1.24689	1.92182	1.86581	2.04892	2.2086	2.26629	0	2.1583	3.03456	2.69078	1.92107	1.71282	1.54859	3.34599	1.70942	0	3.1127	3.0872	0	1.49305	2.09688	0.584029	1.73885	0	0	2.64429
2010005H15Rik	4.6306	4.69288	5.21542	1.24615	3.71911	4.02161	2.58698	3.16087	1.68994	4.45474	3.73981	3.70992	3.83022	3.46486	3.64045	4.66073	5.5599	5.10787	5.97151	6.39931	5.3226	3.41705	3.75644	3.05911	4.56699	3.63759	6.48416	5.93044	6.04632	6.62937	4.2322	5.04168	5.3149	6.30409	5.77559	6.25318
2010016I18Rik	3.80808	3.2425	3.79825	1.71668	1.92915	2.26614	1.80908	0	3.60077	2.7183	0	1.51568	0	3.6202	1.77182	1.9479	3.09687	0	2.37754	4.30074	2.71679	2.14307	3.75644	2.40013	0.81292	0	2.09713	3.99972	1.64803	2.00889	3.08614	2.31969	3.4354	4.30188	2.27544	3.28587
2010107E04Rik	9.11263	9.1963	9.40058	8.65306	9.00558	8.79117	9.41657	8.53287	8.91262	9.33138	9.40522	9.4399	9.26964	9.19455	8.99756	9.26225	9.12091	9.34536	9.57886	9.70847	9.5319	8.92883	9.27273	8.93835	9.02485	9.39664	10.2916	8.82863	8.74082	9.01744	9.80786	9.35145	9.60198	8.89282	8.07629	9.15913
2010111I01Rik	3.85355	3.59806	4.11728	3.34301	4.15784	4.79038	4.30608	3.16087	4.05181	4.78186	4.68478	4.94249	3.53343	4.63509	4.78468	4.74002	5.07643	4.98175	3.8267	4.41057	4.08963	3.81747	4.11812	3.91245	4.31608	4.57843	5.61723	4.7679	4.17571	4.21283	4.99572	5.01965	4.19369	5.26484	5.43483	4.06658
2010204K13Rik	0.923746	0.612609	1.84092	1.24615	1.92915	0	1.80908	0	2.71503	1.92238	2.35611	2.90837	0	0.70274	2.00668	1.53874	2.12369	2.75983	2.20069	2.69078	1.62774	3.07099	1.54859	2.22258	2.00972	3.63759	0	3.99972	2.66337	4.06424	0	1.32025	2.09517	3.37323	3.64666	2.64429
2010315B03Rik	2.33247	2.76961	1.44445	3.27647	1.92915	0	2.58698	0	3.13628	1.26017	2.35611	1.51568	0	2.25264	2.2086	2.74766	3.35539	3.7141	3.4049	3.9099	3.22668	3.338	3.64983	3.34599	2.65474	3.63759	2.91784	3.61443	2.66337	1.49305	3.16357	2.80495	2.61893	3.37323	2.27544	2.64429
2010320M18Rik	3.25124	3.46616	2.81261	3.73863	3.99798	4.97649	3.28757	5.19954	3.95157	3.6043	4.00955	4.35918	4.28637	3.82573	4.38698	4.1818	2.37784	4.59052	4.1032	4.05227	3.90065	4.03356	4.07757	4.31815	3.94284	4.94294	5.25388	3.0872	2.39728	4.25915	4.36926	2.69807	3.71765	4.30188	4.80168	1.45976
2210013O21Rik	4.68192	4.88592	4.79101	4.577	5.22913	4.79038	5.31524	5.03452	4.6719	4.45474	4.68478	4.80532	3.83022	5.09855	4.34474	4.48774	5.00279	5.03353	4.37736	4.30074	4.62585	5.54102	5.19449	4.7372	4.31608	4.71044	5.649	3.99972	4.08791	5.37613	4.81553	4.31927	4.03815	5.26484	0	5.17043
2210016F16Rik	4.97724	5.24912	4.96013	5.53227	5.49175	6.19765	5.44531	5.19954	5.32058	5.99516	6.30885	5.8738	4.77859	5.09855	5.47467	5.64571	6.12599	5.84742	4.6427	4.89928	4.25669	5.11273	4.23336	5.0877	5.36136	4.08951	5.55152	5.11865	5.8468	5.62631	5.43107	4.83019	5.01458	6.35997	5.55758	6.07733
2210016L21Rik	4.17342	4.32516	5.1816	4.68355	5.0774	5.28923	4.47804	5.19954	3.46192	5.04834	4.43292	4.35918	4.63242	4.16551	4.11272	4.51805	4.34404	4.40641	4.67691	4.11851	4.20313	5.06443	4.53238	4.83312	3.87004	4.27152	5.25388	3.0872	3.40643	4.75556	4.36926	4.66973	4.33408	4.86225	3.11818	5.23891
2210408F21Rik	1.48237	1.04127	0	2.21998	0.953156	2.26614	1.80908	2.31378	0	1.26017	2.35611	3.22759	0	3.19514	0.681414	2.52696	3.35539	2.1583	1.13685	2.29207	2.37311	1.09694	0.972806	2.02008	1.70942	3.63759	1.67162	0	2.07076	3.95593	0.953469	2.16775	0.553399	0	2.27544	3.28587
2210418O10Rik	2.0495	2.65311	2.15159	2.59238	2.50602	2.26614	2.24984	3.16087	0	2.37454	1.90558	2.90837	0	2.04892	1.14236	2.84651	2.37784	2.6313	2.80632	2.29207	1.92107	2.14307	1.54859	1.50266	2.00972	3.88117	0	3.99972	1.64803	2.21091	3.23706	1.80535	3.08417	2.85626	2.27544	1.45976
2300009A05Rik	4.80276	4.20615	5.03779	4.63126	4.15784	5.28923	4.47804	4.63408	5.47299	5.04834	4.96405	5.14559	4.91131	4.63509	4.9346	3.88892	4.08328	4.87226	4.80619	4.05227	4.74309	4.60582	4.70205	4.52379	4.36987	2.9759	5.16878	3.61443	4.79054	4.43083	4.7417	4.48918	4.71409	3.37323	3.11818	4.34035
2310001H17Rik	3.50028	2.52637	1.84092	2.59238	3.3731	0	3.8849	0	2.11758	0	3.73981	3.07679	2.65294	3.54462	2.93373	2.52696	2.37784	2.1583	3.13643	4.3567	3.1151	1.4375	3.47351	2.40013	1.70942	1.71772	3.70281	0	1.04755	2.00889	2.50656	3.64128	3.00236	2.04288	0	0
2310009A05Rik	7.33601	7.21012	7.807	6.34052	6.52046	6.34016	7.10306	6.58983	6.5624	6.4281	6.60186	6.62374	7.36609	6.96882	6.99751	6.59615	6.55744	6.35446	7.2543	7.16643	7.68543	7.1864	7.59642	7.07527	7.09234	6.70061	8.3661	5.93044	6.13661	6.35865	7.49461	7.41084	7.52205	6.30409	6.13229	6.34924
2310009B15Rik	5.56063	5.22892	5.9569	5.5882	5.33329	6.46986	5.40324	3.69104	5.9069	5.46768	5.44533	5.54083	4.28637	4.95998	5.26416	4.95468	5.39699	5.67882	5.57776	5.26367	5.21846	4.90903	5.63268	5.0877	5.10004	4.57843	5.93327	4.95391	5.76424	5.35496	5.53672	5.35482	5.49021	5.48186	4.80168	5.36683
2310010J17Rik	5.11432	5.41929	5.34328	3.46753	4.55253	5.76408	4.5569	4.63408	4.79271	4.3599	5.25092	4.75653	5.03284	5.12474	5.07041	3.63604	4.84318	4.72257	5.76435	5.8749	5.75365	4.30696	4.70205	4.52379	5.58254	5.47554	6.25563	6.09774	4.41098	5.45783	5.52209	5.8046	5.3149	5.75626	4.3368	5.09854
2310011J03Rik	5.47593	5.14512	5.11149	5.00452	5.81327	5.14132	5.48618	5.48189	5.85235	5.82806	6.06433	6.19995	5.67948	5.22498	5.69242	5.6996	6.25845	5.72679	6.09051	5.5302	5.53261	5.27005	5.81641	5.6051	5.8329	5.74553	6.10344	5.93044	5.8198	5.79299	5.88422	5.79167	5.76287	5.91391	4.98785	5.42677
2310015A10Rik	4.06161	4.07644	4.4369	2.59238	3.91088	0	3.0896	2.31378	2.71503	3.76098	0	2.71766	3.53343	3.88821	3.32994	3.79302	4.15302	2.87784	4.41839	3.98284	3.1151	3.9825	3.94858	2.83028	2.81846	3.63759	3.92668	3.0872	3.40643	3.148	3.71971	3.5824	4.33408	3.37323	3.64666	4.20995
2310022A10Rik	4.06161	3.39539	3.26422	3.87978	4.30174	2.26614	2.58698	5.34761	4.39492	3.6043	3.20786	5.18299	3.15934	4.26305	2.3857	3.63604	4.45864	3.58123	3.03456	3.75192	2.99415	4.46412	3.12122	3.58519	4.42174	3.34435	1.06547	4.7679	4.33674	4.78751	3.30699	3.85537	3.00236	4.51379	3.64666	2.64429
2310022B05Rik	2.19791	1.63974	1.84092	2.21998	2.917	0	1.17127	4.07788	3.30827	3.6043	4.1276	2.71766	4.07625	1.52746	1.77182	3.18555	2.94788	2.33377	0.677619	0.831486	2.16472	2.96975	0	3.16121	3.62661	1.71772	1.06547	0	2.88794	3.41672	2.24674	1.32025	2.24498	0	0	4.06658
2310033P09Rik	4.60424	5.03304	4.64974	4.0881	4.86211	3.63588	4.63168	4.07788	3.72742	4.45474	4.1276	4.75653	3.83022	4.2151	4.9346	4.76551	4.75622	4.55553	4.05198	4.74007	4.88593	4.50087	3.99287	4.40395	4.78066	2.9759	3.28434	5.83891	4.8977	5.1734	4.63699	4.61202	4.60745	5.26484	4.80168	4.20995
2310035C23Rik	3.55636	3.88309	4.11728	4.12639	4.71561	4.57665	4.21174	4.38262	3.95157	5.10793	4.68478	2.90837	4.07625	3.38044	4.61734	3.74257	3.35539	2.98692	4.24678	4.60795	2.55516	3.07099	4.15756	4.27325	3.0989	1.71772	3.92668	5.11865	3.25341	3.33259	4.04025	3.90428	4.15635	2.04288	2.27544	3.90738
2310036O22Rik	7.54793	7.45596	7.27689	7.5267	7.62631	6.89629	7.10306	7.39075	7.04832	7.14893	6.87934	7.25301	7.6004	7.67483	7.43511	7.40624	7.00682	7.49622	7.34753	7.15858	7.3332	7.53542	7.40893	7.39637	7.44542	7.43202	7.91545	7.52913	7.0117	7.31737	7.31535	7.68371	7.57608	7.35116	7.70348	7.67294
2310039H08Rik	5.67903	5.66471	5.03779	4.60439	5.52146	4.97649	5.17228	2.31378	5.32058	4.54373	5.3514	5.21945	5.95021	5.22498	5.01761	5.40745	5.45336	5.64593	5.78017	4.97275	5.61696	5.2486	5.53122	5.39065	5.1925	5.61684	6.48416	3.61443	5.33913	5.39699	5.50732	5.61197	5.6465	4.51379	4.3368	5.02287
2310040G24Rik	2.95005	4.12099	4.25373	3.52598	3.23648	2.26614	2.86007	0	3.84384	2.9957	3.40777	3.9016	0	3.82573	3.83609	3.45988	3.76476	3.58123	3.63116	4.05227	4.25669	3.8746	3.34273	3.05911	3.7124	4.08951	4.82382	0	2.39728	2.93629	3.99859	3.38978	3.30498	0	0	3.7284
2310057J18Rik	1.88405	1.37132	1.44445	1.90464	0	0	1.80908	3.16087	1.68994	1.26017	2.97572	2.90837	1.86581	1.52746	0.681414	1.75778	2.12369	1.9585	0.677619	0.831486	2.37311	1.4375	1.28923	1.50266	1.32971	4.71044	2.09713	0	1.04755	2.21091	1.26591	2.16775	1.92799	0	0	0
2310057M21Rik	3.25124	2.8774	0.895917	2.88811	3.08557	0	1.17127	0	0	0	0	3.36411	1.86581	1.52746	2.54342	2.26629	2.94788	1.44993	2.37754	0	2.37311	2.14307	2.53935	2.83028	2.65474	3.34435	1.67162	0	0	1.7739	1.26591	1.32025	2.61893	3.75304	4.03261	3.52404
2310061I04Rik	3.61034	4.28657	3.38801	4.30391	3.08557	4.97649	4.00227	4.63408	4.05181	3.6043	3.73981	4.65372	5.03284	3.76042	3.89582	4.14343	3.93279	4.24007	3.69933	3.75192	3.90065	4.50087	3.64983	4.98006	4.31608	3.63759	3.92668	0	3.67098	4.75556	2.91756	4.2068	3.9965	4.51379	4.3368	4.06658
2410002F23Rik	2.33247	1.86596	1.84092	2.79611	3.3731	3.63588	2.86007	0	3.46192	0	1.24689	3.07679	1.86581	2.86313	2.2086	1.75778	3.23192	2.49019	1.48465	2.29207	2.16472	2.74309	2.53935	2.94923	1.70942	0	1.67162	0	2.88794	2.68807	2.62079	2.45714	1.92799	2.04288	0	2.64429
2410004B18Rik	5.05716	5.45453	4.69838	4.27011	4.15784	4.02161	4.95654	0	3.95157	4.14917	4.1276	4.42309	5.03284	5.04471	4.72005	4.21918	3.93279	5.00787	4.80619	5.23409	4.70506	3.75799	5.01285	3.96985	4.61233	4.27152	5.0309	3.61443	3.99443	5.07326	4.55315	5.04168	4.19369	4.51379	4.58789	4.57036
2410006H16Rik	8.3809	8.43651	8.6546	8.70616	8.87648	8.97719	9.01014	9.14212	9.07925	8.29888	8.29513	8.36271	8.73742	9.17432	8.57949	8.10777	8.33331	8.2235	8.76499	9.08625	8.65724	8.47492	9.2213	8.71525	8.42866	8.84183	9.78795	8.19692	8.07622	8.42881	8.98105	8.38522	8.47138	8.4788	7.80609	8.18787
2410015M20Rik	7.34797	7.29032	7.00447	6.72431	6.99293	7.43017	7.42026	7.08792	6.6125	7.10573	6.75645	7.18089	7.0862	6.78399	6.6784	6.7381	6.39424	6.65644	7.17871	7.46264	7.28889	6.87256	7.35056	7.24764	7.06814	7.33308	7.74219	6.56576	6.5188	7.06703	7.51691	7.00845	7.31314	6.70019	6.99738	7.15787
2410016O06Rik	4.75563	4.36274	5.03779	4.4008	4.9951	3.63588	4.1108	2.31378	4.46931	4.98619	4.83116	4.07077	5.34593	4.95998	5.01761	4.06348	3.35539	4.69067	5.03445	4.41057	5.3475	4.79528	4.11812	5.03488	4.74039	4.08951	4.2912	4.3035	4.99746	4.25915	4.52408	5.22609	4.95059	4.30188	4.98785	4.20995
2410089E03Rik	3.31764	3.32097	1.44445	3.20671	2.917	3.10781	3.8849	2.31378	4.23354	1.92238	2.69893	4.35918	4.28637	3.69201	3.32994	3.18555	3.35539	3.35573	3.13643	3.25923	3.33026	2.14307	3.34273	3.43021	2.96548	3.63759	1.06547	3.0872	3.40643	1.7739	3.30699	3.08499	3.30498	0	5.15271	3.28587
2410131K14Rik	4.09985	3.83041	3.88486	3.52598	3.3731	3.63588	4.39462	3.69104	3.95157	1.92238	3.73981	3.70992	2.65294	3.6202	3.41405	3.63604	4.28313	3.43488	4.77494	3.83307	3.75934	3.8746	3.64983	3.72512	4.4718	4.83137	4.76705	3.61443	2.88794	3.57156	3.30699	3.45689	4.23009	3.37323	4.03261	2.17033
2500002B13Rik	5.44656	5.12339	5.31236	4.91986	6.05587	5.76408	6.67835	5.92072	6.30242	5.10793	6.33362	6.18159	5.67948	6.05028	6.47803	5.56091	4.61509	5.05874	5.13633	4.69736	5.41973	5.46865	5.32148	5.13865	6.09491	6.56766	6.95992	2.24769	5.33913	4.84937	5.67537	5.59717	6.08445	4.51379	0	4.34035
2510002D24Rik	4.4937	4.03048	4.49312	4.4008	4.08013	3.10781	4.63168	5.03452	4.14554	4.54373	2.97572	4.4843	3.83022	4.90059	3.04344	3.39603	4.51269	3.89293	4.4971	4.65335	4.58455	4.73485	5.37266	4.44502	4.1415	4.83137	3.70281	2.24769	3.99443	4.30402	4.93076	4.83019	4.76459	4.69852	4.03261	4.34035
2510039O18Rik	5.33876	5.28871	5.69451	5.53227	5.60707	6.12073	5.77716	6.25673	5.19468	5.86307	5.94075	5.8738	6.01063	5.4279	5.35208	5.10202	5.90125	5.8182	5.11153	5.93128	5.67714	5.18226	5.19449	5.45236	5.60514	6.25819	4.58195	6.17463	5.79229	6.05168	5.28278	5.77861	5.60552	5.00929	5.55758	4.67293
2610001J05Rik	6.45226	6.58832	6.81894	6.29082	6.1914	6.64486	6.52987	5.60473	7.04832	7.07621	6.49608	6.80259	6.73862	6.56241	6.62646	6.90222	6.76099	7.11271	6.5255	6.8431	6.50593	6.41424	6.63912	6.66162	6.85833	6.56766	7.43111	5.26649	6.02284	6.58461	7.04051	6.73869	6.88694	6.78429	5.67069	6.7753
2610002M06Rik	4.97724	4.63262	4.54724	5.04505	4.71561	4.32566	4.1108	4.07788	4.14554	4.14917	5.3514	4.59942	4.46974	4.59818	4.30122	4.76551	4.84318	5.08351	4.6427	5.14155	4.54203	4.53671	5.13645	4.7372	4.4718	5.31889	4.93107	4.95391	4.99746	4.34754	5.03746	4.48918	4.30024	4.69852	5.15271	4.06658
2610005L07Rik	3.61034	3.07147	3.12881	3.20671	3.3731	3.10781	2.24984	2.31378	1.68994	1.26017	1.24689	2.49783	1.86581	2.25264	2.00668	3.45988	0.879325	2.87784	2.67705	3.75192	2.55516	2.96975	2.53935	2.83028	2.65474	0	3.1127	2.24769	2.88794	1.7739	3.00431	2.80495	3.00236	4.0534	0	2.64429
2610008E11Rik	2.0495	2.23363	2.40707	3.40661	0.953156	0	1.80908	0	2.11758	0	0	2.71766	0	2.25264	2.00668	2.26629	3.67279	1.44993	3.23158	3.25923	2.16472	3.63111	2.76042	2.40013	2.65474	1.71772	1.06547	3.61443	2.66337	2.21091	2.38249	2.16775	2.38069	2.04288	0	1.45976
2610020C07Rik	2.67406	2.52637	3.79825	2.88811	2.50602	2.26614	1.80908	2.31378	3.30827	2.37454	3.88097	2.71766	0	2.73299	2.93373	1.75778	0.879325	1.10744	2.92495	2.50515	2.37311	2.31803	2.41466	3.05911	1.32971	4.57843	2.09713	3.61443	1.04755	2.00889	3.08614	2.69807	3.49644	0	0	1.45976
2610020H08Rik	1.69714	3.71891	3.60766	2.59238	1.52216	0	3.75713	4.84815	2.71503	0	3.58332	2.49783	3.15934	2.73299	3.04344	1.2804	2.7817	2.87784	2.20069	3.25923	2.71679	3.07099	3.53471	4.07823	2.65474	2.47983	2.09713	0	1.64803	2.00889	2.50656	2.16775	2.91563	0	3.11818	1.45976
2610044O15Rik8	0.534577	2.23363	2.81261	2.21998	3.23648	2.26614	1.17127	0	1.68994	1.92238	0	1.51568	1.86581	1.81162	1.14236	1.2804	0	2.33377	1.76468	2.85522	2.16472	1.4375	2.41466	2.70065	0	1.71772	1.06547	2.24769	1.64803	2.93629	2.38249	1.9979	1.92799	2.04288	2.27544	2.17033
2610301B20Rik	2.86379	3.39539	3.38801	3.20671	1.52216	3.63588	2.86007	0	2.44702	0	1.24689	2.23839	1.86581	0	1.49115	2.11586	2.59385	2.75983	2.53505	2.04197	2.16472	1.94392	3.1989	3.05911	1.70942	4.43313	2.09713	0	3.54476	3.24325	2.72664	2.16775	3.00236	0	3.11818	3.00046
2610306M01Rik	2.45554	2.76961	3.38801	2.47861	1.92915	0	0	0	2.11758	0	1.24689	2.71766	3.53343	2.43113	1.49115	0.965476	0.879325	2.33377	2.67705	3.25923	2.71679	1.94392	2.27817	2.22258	2.00972	4.08951	3.57635	0	2.07076	0.682524	2.24674	3.38978	3.16159	0	0	0
2610318N02Rik	2.67406	2.9777	1.44445	2.21998	1.92915	3.10781	1.17127	0	1.68994	3.22827	2.97572	3.07679	1.86581	3.19514	2.2086	2.74766	3.46913	3.35573	2.20069	1.3556	1.92107	2.61483	0.56689	1.50266	1.70942	1.71772	2.09713	3.61443	3.89446	3.83883	2.62079	2.16775	2.72475	3.75304	4.3368	3.28587
2610507B11Rik	5.20482	4.80633	4.83518	5.41345	5.68789	5.14132	5.44531	4.84815	5.57758	5.5559	5.3514	5.38907	3.53343	5.09855	5.17053	5.67291	5.65911	5.78837	5.55953	4.3567	4.54203	5.59301	4.90109	5.6051	4.78066	4.83137	2.91784	5.83891	5.73563	5.91372	4.63699	4.28274	4.30024	5.57924	5.96493	5.36683
2610524H06Rik	4.52214	4.60152	4.91967	4.20004	5.03683	5.42337	5.22152	3.16087	4.39492	4.62755	4.83116	5.32359	5.14492	5.12474	4.84653	5.43947	4.71069	5.17857	4.37736	4.41057	4.74309	4.73485	4.94684	4.76989	4.20207	5.74553	6.08032	4.7679	5.13523	5.19738	5.7273	4.77866	5.13465	5.26484	4.3368	5.64437
2700038G22Rik	2.0495	2.8774	0	2.47861	0.953156	0	2.86007	0	2.44702	2.7183	3.73981	3.48882	0	2.58994	2.3857	3.84176	2.12369	4.05203	1.9991	3.47686	2.16472	1.94392	2.53935	2.5582	2.96548	3.88117	0	3.0872	1.64803	3.64316	3.55705	3.08499	2.50472	3.37323	0	4.20995
2700049A03Rik	4.1371	3.93391	2.40707	4.16368	4.23158	0	3.0896	0	3.95157	2.37454	1.90558	2.71766	1.86581	3.46486	4.42802	3.18555	3.93279	3.18308	3.13643	3.00282	2.16472	4.26484	3.2726	4.07823	2.96548	3.63759	1.67162	4.7679	3.89446	3.57156	3.37368	2.69807	3.66545	4.0534	0	2.64429
2700060E02Rik	7.35984	7.04655	7.23628	7.27733	7.56344	7.4617	7.57983	7.61192	7.57173	7.9781	7.97907	7.69618	6.96927	7.61142	7.39427	7.71833	7.6795	7.83216	7.30987	7.308	7.45278	7.33119	7.20284	7.0355	7.32121	7.94217	8.22569	7.46934	7.63226	7.79315	7.83357	7.49307	7.61444	8.3605	7.44183	7.37121
2700062C07Rik	3.89763	3.65975	3.88486	4.2355	4.66327	2.26614	4.77051	3.69104	4.73357	4.14917	4.43292	4.4843	4.46974	4.77394	3.89582	4.54774	3.93279	4.44516	3.94373	3.98284	4.14749	4.96272	4.26981	3.85267	3.79337	3.63759	3.1127	3.99972	4.08791	4.54739	4.36926	3.85537	3.4354	5.37743	4.03261	4.45993
2700094K13Rik	7.67051	8.16326	8.06989	8.37162	8.31017	7.86686	8.5522	8.4857	8.29377	8.58755	8.66577	8.6862	8.35006	8.26628	8.34515	8.68349	8.48974	8.7147	8.14651	8.11348	8.313	8.27988	8.45105	7.92505	8.2248	8.10695	9.18587	8.04136	8.36476	8.56179	8.76513	8.34372	8.45225	8.3605	8.37228	8.41943
2700097O09Rik	2.19791	1.37132	2.62404	2.88811	2.50602	3.10781	2.58698	2.31378	2.11758	2.37454	2.35611	3.36411	0	2.43113	2.81498	3.02597	2.7817	3.35573	2.20069	2.29207	4.14749	2.61483	2.85942	3.34599	2.96548	3.63759	3.70281	3.0872	3.08222	2.81751	3.08614	2.80495	2.72475	3.75304	4.03261	3.7284
2700099C18Rik	2.77204	3.93391	4.25373	4.33693	3.91088	4.02161	4.39462	0	3.60077	1.92238	2.97572	3.22759	3.15934	4.0056	3.70865	3.02597	3.35539	3.50991	3.8267	4.46251	3.51745	3.92956	4.11812	3.58519	3.22101	1.71772	2.69249	3.0872	2.88794	3.57156	4.1958	3.80475	3.95361	2.04288	2.27544	3.7284
2810001G20Rik	4.55003	4.63262	5.03779	2.9746	3.49789	2.26614	3.46163	4.38262	3.30827	1.92238	4.1276	3.07679	4.46974	3.6202	4.75272	3.25918	3.46913	3.18308	4.67691	4.97275	5.29726	4.38768	4.94684	4.27325	4.56699	4.71044	5.61723	3.0872	2.07076	3.24325	4.81553	4.61202	4.15635	3.75304	0	4.57036
2810002D19Rik	3.50028	4.03048	3.60766	2.69784	2.917	3.10781	2.24984	3.69104	2.44702	2.37454	3.40777	2.49783	1.86581	2.25264	1.77182	2.11586	2.59385	2.49019	3.32084	3.75192	4.40641	2.31803	3.59342	3.34599	3.62661	2.9759	4.51457	0	3.54476	1.7739	1.74041	2.99755	3.37167	0	0	3.52404
2810004N23Rik	6.03533	6.1992	5.99634	5.91783	5.36641	5.5461	5.60228	6.09849	5.61083	6.02638	6.03441	6.45054	5.60304	5.66049	5.26416	6.51581	6.54453	6.0868	5.94367	5.57806	5.79044	6.10372	6.01201	5.7099	5.67091	5.86367	4.51457	5.26649	6.46754	6.66421	5.9403	5.65547	5.82368	6.82457	6.54218	6.40991
2810006K23Rik	4.57739	3.983	3.79825	4.27011	4.23158	3.10781	3.75713	2.31378	4.14554	3.76098	2.35611	3.22759	3.83022	3.69201	3.70865	4.48774	3.23192	4.05203	3.8864	4.30074	3.51745	4.50087	4.30537	4.44502	3.87004	3.88117	4.93107	3.61443	3.89446	3.71137	4.12012	3.64128	3.71765	2.04288	3.11818	4.06658
2810013P06Rik	5.1693	4.56973	4.54724	3.58215	3.49789	4.02161	3.46163	4.38262	4.14554	3.76098	4.60561	3.70992	3.83022	4.0609	4.06147	4.06348	3.93279	4.05203	4.98068	5.79614	5.21846	4.67178	5.0342	4.56163	4.31608	4.27152	4.76705	5.93044	4.41098	4.72289	4.86273	3.95158	5.07586	3.37323	3.11818	3.52404
2810021J22Rik	2.0495	2.52637	2.40707	2.35508	1.92915	2.26614	2.58698	4.07788	3.46192	1.26017	2.35611	0	0	1.81162	2.00668	1.9479	2.37784	3.08833	3.48433	3.47686	2.99415	2.61483	2.85942	1.78444	2.25816	2.9759	3.1127	2.24769	2.39728	2.00889	2.24674	2.69807	2.09517	2.04288	3.64666	4.06658
2810025M15Rik	4.80276	4.56973	3.88486	5.33388	5.0774	4.97649	5.74384	3.69104	5.43637	5.63904	5.94075	4.85251	5.88714	5.3187	4.75272	5.82613	5.72928	5.78837	4.60765	5.17306	4.62585	5.3528	4.53238	4.56163	5.16234	5.31889	5.44696	4.95391	5.17838	6.09062	5.24765	4.85528	4.81338	4.69852	5.43483	5.694
2810403A07Rik	5.22226	4.72209	4.25373	4.98382	2.50602	4.32566	2.58698	4.07788	3.95157	4.45474	3.40777	3.98866	1.86581	3.19514	4.11272	3.84176	4.40247	4.62468	5.00782	4.82187	4.74309	3.41705	4.30537	4.02506	3.53539	2.47983	3.92668	5.40059	3.40643	3.57156	4.81553	4.48918	4.78919	3.37323	4.80168	3.7284
2810403D21Rik	2.33247	2.06148	3.50201	2.47861	2.24623	2.26614	1.80908	0	2.44702	1.26017	1.24689	2.90837	2.65294	1.52746	1.14236	2.64152	1.42171	1.44993	2.80632	3.00282	0.762784	3.07099	2.65411	1.78444	2.00972	1.71772	0	0	0	3.04603	2.38249	0.9986	3.00236	0	0	0
2810408A11Rik	2.0495	1.63974	0.895917	2.35508	1.92915	0	0	2.31378	0	0	1.24689	0.948355	0	1.52746	1.77182	1.9479	1.81498	1.44993	1.9991	2.29207	2.37311	1.09694	1.76835	1.78444	0	4.08951	1.67162	2.24769	2.07076	1.49305	1.74041	2.58263	1.52113	2.85626	3.11818	3.00046
2810408I11Rik	5.85703	6.0914	6.29409	6.22178	5.60707	6.27066	5.17228	5.60473	5.10419	4.85324	5.57568	5.77928	6.17807	5.60576	5.80575	5.56091	4.71069	5.46919	5.78017	6.08828	5.99341	6.53434	6.40516	6.22799	5.06785	5.14313	5.58475	5.26649	4.41098	4.87933	6.13551	5.90414	5.82368	4.30188	4.98785	4.94302
2810417H13Rik	7.31178	7.57281	7.36991	8.05426	7.69309	7.93583	8.02339	7.66934	7.4392	7.85309	8.23722	8.12878	8.4407	7.61142	7.97464	8.0519	7.72027	8.10447	7.23721	7.53718	7.53638	7.74142	7.93399	7.74358	7.6711	7.87341	8.70898	6.9626	7.37841	7.46792	8.50927	7.94265	7.91477	7.81819	6.54218	7.62257
2810428I15Rik	5.64063	5.95041	5.99634	5.56051	5.52146	5.14132	5.84158	5.92072	5.82428	5.96325	6.12236	6.67714	5.75207	5.89157	6.25671	6.18843	6.4645	6.2379	5.59575	5.29265	5.69665	6.07963	6.01201	6.0263	5.81362	5.74553	6.35529	5.52327	5.95001	6.23665	6.16405	5.69769	5.6465	5.00929	6.20921	5.17043
2810454H06Rik	1.69714	2.76961	2.40707	0.937132	0	3.10781	0	0	2.44702	1.92238	2.69893	0.948355	1.86581	1.52746	1.77182	1.9479	2.94788	0.657472	2.67705	3.13671	3.42689	1.4375	3.94858	3.05911	2.96548	2.47983	3.92668	2.24769	1.64803	3.04603	2.91756	3.38978	3.23507	0	0	1.45976
2810474O19Rik	6.82183	6.67304	7.07063	6.01286	6.26349	7.52276	5.84158	6.81008	6.24004	6.72305	6.56047	6.10572	6.62724	6.09069	6.60872	7.11547	6.74978	6.7131	7.05408	7.11868	6.67286	5.89866	5.97937	6.07943	6.38348	6.66851	3.28434	8.12123	7.2325	7.27292	6.45333	6.58969	6.75578	7.50779	8.43767	7.55703
2900005J15Rik	1.88405	1.37132	0.895917	0.937132	1.92915	6.27066	0	0	1.68994	1.92238	0	1.92182	1.86581	0	1.14236	1.53874	0.879325	2.33377	1.13685	1.3556	0.762784	0.650307	1.54859	1.78444	1.32971	0	1.67162	3.0872	2.88794	3.24325	0	0	1.52113	0	0	0
2900055J20Rik	3.76112	3.71891	4.54724	3.58215	3.49789	2.26614	2.86007	4.07788	3.72742	3.9023	4.33815	3.70992	3.15934	3.54462	2.81498	3.52102	3.85122	3.27199	4.05198	3.83307	3.33026	3.56322	3.53471	3.72512	3.53539	5.39934	3.43772	3.99972	3.08222	3.41672	3.55705	3.69785	3.55501	3.75304	4.03261	3.7284
2900060B14Rik	3.38113	3.83041	3.60766	2.69784	1.52216	3.63588	2.24984	0	2.94098	3.9023	2.35611	1.51568	3.15934	2.86313	2.93373	2.52696	0.879325	1.10744	4.743	4.86109	4.78015	2.74309	4.77994	4.52379	3.33359	3.34435	3.92668	3.99972	0	1.7739	1.92963	3.45689	3.23507	0	0	2.64429
2900076A07Rik	4.06161	4.50398	4.18712	4.04878	3.3731	3.63588	3.61693	2.31378	2.71503	3.6043	1.90558	4.07077	4.07625	3.6202	3.83609	1.75778	3.46913	2.6313	4.45828	4.69736	4.02934	3.338	4.50206	3.65685	3.62661	3.63759	4.64633	3.61443	2.07076	3.77651	3.7701	3.08499	4.39946	2.85626	2.27544	3.00046
2900097C17Rik	4.87069	4.66306	4.64974	4.82993	4.81491	5.42337	4.39462	4.63408	4.6719	5.04834	4.96405	5.02719	5.03284	4.70618	4.9628	4.57682	5.21331	4.90042	4.05198	4.11851	5.01588	4.85328	4.07757	4.66951	4.61233	4.57843	4.64633	4.5543	4.99746	5.07326	4.63699	4.64117	4.57951	5.26484	5.67069	5.09854
3000002C10Rik	3.38113	2.8774	3.26422	2.88811	2.917	4.02161	4.1108	3.16087	3.95157	3.22827	2.97572	4.14845	3.83022	3.9481	4.11272	3.74257	3.76476	3.7141	4.05198	4.11851	3.60267	4.34788	3.59342	3.96985	3.94284	3.63759	3.43772	2.24769	3.40643	3.71137	3.30699	3.85537	3.55501	2.85626	3.11818	3.7284
3010003L21Rik	4.46469	3.39539	4.79101	3.73863	3.71911	2.26614	3.75713	5.03452	5.27982	4.03101	5.44533	4.35918	4.63242	4.16551	3.95318	4.1818	4.21954	3.89293	4.41839	5.14155	4.30834	3.63111	4.72848	4.52379	4.07827	5.68262	4.70795	5.26649	4.41098	4.68945	4.81553	4.38965	4.52195	4.86225	5.43483	4.76869
3010026O09Rik	1.69714	1.63974	1.84092	3.05619	3.23648	2.26614	3.0896	3.16087	2.94098	2.9957	3.40777	3.9016	3.83022	2.73299	3.49353	2.74766	3.09687	3.08833	3.03456	1.3556	1.62774	3.16559	2.95207	3.58519	3.87004	2.9759	2.09713	5.26649	3.67098	3.33259	3.30699	3.08499	3.30498	4.86225	2.27544	3.00046
3110002H16Rik	4.82576	4.72209	4.69838	4.27011	4.23158	4.02161	3.75713	4.07788	4.6719	3.4285	4.1276	4.07077	4.63242	4.11415	4.00834	3.63604	4.40247	3.58123	5.11153	5.40308	4.98448	3.9825	4.50206	4.07823	4.42174	4.43313	4.51457	5.26649	4.73382	4.25915	4.33619	4.04176	4.462	4.30188	4.98785	4.06658
3110009E18Rik	5.30643	4.98565	5.07511	4.73401	4.43258	5.9534	6.07384	5.19954	5.15014	4.70677	5.19793	5.28971	4.28637	4.2151	4.75272	5.32413	4.45864	5.15538	4.89607	5.2039	4.78015	5.03967	5.11657	5.13865	5.25101	6.16921	6.37442	4.5543	3.99443	5.07326	5.50732	5.37231	5.24548	5.26484	5.30065	4.57036
3110040N11Rik	4.57739	5.47183	4.96013	4.85294	4.81491	4.02161	5.80973	5.34761	4.95684	5.42146	5.19793	5.28971	5.75207	4.90059	4.75272	4.95468	5.33832	5.54251	5.27681	5.89394	5.46595	5.31202	5.74051	4.80185	4.85799	5.39934	5.29462	4.95391	5.09075	5.14901	6.09655	5.08474	5.24548	3.75304	5.43483	5.42677
3110043O21Rik	3.18163	2.23363	2.81261	2.59238	4.15784	4.97649	2.24984	0	3.46192	1.92238	1.24689	3.9016	0	4.0609	2.93373	3.18555	3.67279	2.6313	3.69933	3.25923	3.33026	3.81747	3.1989	3.43021	3.33359	2.9759	4.0268	4.3035	3.99443	3.24325	3.16357	3.31941	4.03815	2.85626	4.58789	2.64429
3110056K07Rik	4.31017	3.46616	4.83518	4.16368	3.81818	2.26614	3.8849	3.16087	2.94098	2.9957	1.24689	2.23839	1.86581	3.46486	3.24061	3.10797	2.37784	3.27199	4.37736	4.65335	4.20313	2.74309	3.59342	3.96985	3.87004	2.9759	4.58195	0	4.25847	3.77651	3.71971	3.69785	3.30498	2.85626	4.58789	1.45976
3110062M04Rik	5.11432	5.12339	4.64974	4.33693	4.36864	4.32566	4.63168	5.03452	4.39492	3.76098	3.58332	4.4843	5.14492	4.93059	5.14615	4.02178	4.51269	4.14911	5.38425	5.34892	5.01588	4.4264	4.23336	4.98006	4.89516	4.83137	5.649	4.3035	4.25847	3.83883	5.50732	4.61202	4.97224	2.04288	3.11818	3.90738
3110082I17Rik	3.44193	3.2425	3.60766	3.52598	3.3731	2.26614	5.12129	2.31378	5.27982	4.98619	5.14292	4.59942	4.77859	4.35441	4.06147	4.83938	4.34404	4.98175	4.57173	3.75192	3.96643	4.4264	4.11812	4.48494	4.07827	4.27152	4.82382	5.11865	5.261	4.96566	3.99859	3.85537	4.11802	4.30188	4.03261	4.20995
3830403N18Rik	1.48237	0.612609	4.5994	2.47861	2.24623	0	0	2.31378	1.68994	2.37454	0	0.948355	3.15934	1.17325	1.49115	2.52696	0	0	0.677619	3.57449	2.99415	3.25437	0.972806	2.02008	0.81292	0	1.67162	3.61443	3.40643	2.38808	3.23706	1.32025	2.24498	0	0	3.28587
3830406C13Rik	5.67903	5.53903	5.83166	5.51794	5.66145	4.79038	5.80973	6.25673	5.3988	6.1449	6.06433	5.94084	5.82118	5.66049	5.39411	5.82613	5.88085	5.87607	5.38425	5.14155	4.98448	5.41189	5.48545	5.39065	5.38768	6.12257	6.14858	4.5543	5.48375	5.57231	5.44665	5.20673	4.90629	5.75626	5.43483	5.36683
4632415L05Rik	3.10849	2.06148	3.60766	2.69784	3.61274	3.10781	1.17127	3.16087	2.44702	2.9957	1.90558	2.90837	0	2.04892	2.54342	2.74766	3.57455	3.7141	2.53505	3.9099	2.71679	3.49199	3.2726	2.22258	2.96548	1.71772	2.91784	3.0872	3.40643	3.24325	2.38249	3.08499	2.61893	2.85626	0	2.17033
4632427E13Rik	5.13288	4.80633	4.96013	3.27647	3.61274	3.63588	4.5569	4.38262	4.39492	3.9023	4.43292	3.70992	4.91131	4.35441	3.49353	3.84176	2.12369	3.7762	4.24678	5.40308	4.62585	4.50087	3.80693	4.31815	4.56699	5.54792	5.33424	4.5543	4.5489	3.24325	4.7417	4.99729	5.44447	4.0534	4.03261	4.06658
4833417C18Rik	1.22993	0	2.62404	1.71668	2.24623	0	0	0	0	2.9957	0	2.23839	0	0.70274	1.77182	0.562039	2.12369	1.44993	0	2.50515	1.62774	1.09694	1.28923	0.688148	2.00972	0	0	0	1.04755	1.14397	0.953469	2.80495	0	0	0	0
4833419F23Rik	1.69714	3.39539	3.96657	1.90464	0.953156	0	2.86007	0	1.07944	1.92238	1.24689	2.23839	2.65294	0.70274	1.77182	1.75778	2.12369	1.72651	2.92495	2.69078	1.25914	1.4375	2.27817	1.78444	2.00972	0	2.42531	2.24769	0	2.38808	1.92963	0.9986	2.50472	0	0	2.17033
4833420G17Rik	4.82576	5.20842	5.21542	5.04505	5.0774	4.79038	5.52593	3.16087	5.32058	5.32433	5.76973	4.4843	4.77859	5.07188	4.38698	4.97667	5.00279	4.98175	5.61353	5.34892	5.39605	5.11273	5.46987	4.86373	4.96673	5.0465	4.87844	5.11865	5.09075	4.81877	5.44665	5.73872	5.51991	4.69852	5.43483	5.53967
4833439L19Rik	5.1512	4.85988	5.46073	4.91986	5.39878	5.5461	5.44531	5.82288	5.10419	4.98619	5.69521	5.10719	5.95021	5.46936	5.14615	4.83938	5.58535	5.2892	4.80619	5.45528	5.07672	4.98883	4.85384	5.36947	5.46387	5.68262	4.76705	4.3035	5.261	5.39699	4.63699	4.95149	5.07586	4.69852	5.15271	5.48433
4921524J17Rik	6.01546	5.88734	6.30983	6.34864	6.17281	6.64486	6.07384	5.82288	5.87989	5.59807	5.57568	5.32359	6.12439	5.93661	5.69242	5.76425	5.5599	5.31035	5.63109	5.85561	6.21257	5.52327	6.09562	5.7432	5.4884	5.0465	5.88072	5.11865	5.261	5.33347	5.84949	5.2452	5.19113	5.48186	4.58789	5.694
4921531C22Rik	3.31764	2.23363	3.12881	1.71668	2.24623	0	1.17127	2.31378	1.68994	1.26017	2.97572	3.48882	2.65294	1.81162	2.93373	1.9479	2.7817	2.6313	3.4049	3.37214	2.71679	2.31803	2.53935	1.15214	3.33359	0	3.92668	0	2.39728	3.33259	2.38249	2.31969	3.37167	0	0	2.64429
4930402H24Rik	2.95005	3.39539	3.79825	2.79611	1.92915	0	0	3.16087	2.94098	1.92238	2.69893	1.51568	1.86581	2.73299	2.2086	1.75778	0	1.9585	2.80632	3.25923	3.1151	3.25437	2.65411	3.91245	1.32971	0	1.67162	3.61443	0	1.49305	2.62079	2.80495	2.61893	0	0	3.00046
4930413F20Rik	1.48237	1.37132	1.84092	1.50051	1.52216	0	2.24984	5.71793	1.07944	0	1.24689	1.92182	1.86581	1.52746	1.49115	0.562039	0	1.10744	1.76468	2.29207	2.16472	1.09694	0.972806	1.78444	2.00972	0	1.06547	0	1.04755	0	2.24674	0.584029	0.952392	0	2.27544	2.17033
4930413G21Rik	1.69714	2.06148	0	1.24615	2.24623	2.26614	3.61693	0	2.11758	2.9957	1.90558	2.90837	0	1.81162	1.14236	2.4025	2.12369	2.87784	2.53505	2.04197	1.92107	1.71282	2.1274	2.83028	1.70942	3.88117	2.69249	3.99972	2.39728	3.71137	3.71971	2.90446	2.91563	3.75304	4.80168	2.17033
4930427A07Rik	2.86379	2.76961	0.895917	4.65764	5.0774	4.02161	4.00227	3.69104	3.72742	2.7183	3.58332	3.22759	2.65294	3.46486	4.21005	3.25918	4.01	3.58123	2.67705	2.50515	3.60267	4.08288	3.47351	3.96985	2.65474	2.47983	2.42531	3.61443	3.54476	3.41672	3.16357	3.521	3.71765	3.37323	0	3.52404
4930430F08Rik	3.44193	2.52637	3.12881	2.59238	2.24623	3.10781	3.0896	3.69104	3.46192	2.7183	1.24689	2.49783	2.65294	2.98249	2.3857	3.79302	2.59385	2.6313	4.1032	0.831486	3.33026	3.338	2.53935	3.91245	2.47004	4.57843	2.09713	4.3035	2.88794	3.24325	2.38249	2.31969	2.91563	3.37323	0	3.00046
4930453N24Rik	4.57739	5.34613	5.28077	5.51794	5.22913	4.97649	4.5569	4.63408	5.36022	4.78186	5.3514	4.98546	4.46974	5.01701	4.46792	5.21734	4.5648	5.15538	4.89607	4.46251	5.1912	5.18226	4.99118	4.7372	4.96673	5.47554	5.21196	5.11865	4.94844	5.35496	4.95274	5.2452	5.36487	5.00929	5.15271	4.34035
4930455D15Rik	0.923746	0	0	0	1.52216	0	2.58698	4.38262	1.68994	2.9957	5.30204	0.948355	0	1.81162	3.49353	0	0	0.657472	1.13685	0.831486	1.62774	0.650307	3.75644	3.05911	0	8.15409	3.28434	2.24769	0	2.00889	3.00431	1.80535	3.16159	0	0	3.00046
4930455G09Rik	3.31764	2.65311	0.895917	2.9746	3.3731	0	3.0896	0	1.68994	4.62755	3.20786	3.36411	4.28637	2.86313	3.04344	3.10797	3.57455	3.35573	1.9991	3.00282	0.762784	2.31803	0.56689	1.78444	3.22101	1.71772	2.91784	0	3.25341	2.81751	2.50656	2.99755	2.82334	2.85626	3.64666	2.17033
4930465K10Rik	1.88405	2.06148	2.15159	1.50051	2.24623	0	3.46163	3.16087	2.11758	2.37454	2.35611	2.49783	1.86581	1.81162	2.00668	2.4025	1.42171	2.98692	2.20069	2.29207	2.71679	0.650307	2.27817	1.78444	2.00972	3.34435	3.57635	3.0872	3.25341	2.81751	3.16357	2.45714	2.09517	2.85626	2.27544	2.17033
4930477N07Rik	2.0495	1.63974	2.40707	2.35508	0.953156	3.10781	1.80908	3.16087	2.44702	2.7183	2.97572	2.49783	0	2.25264	2.3857	2.52696	0.879325	2.1583	1.76468	2.69078	2.55516	2.74309	2.76042	2.22258	1.70942	3.34435	2.09713	3.0872	2.39728	2.38808	1.52258	1.32025	2.09517	2.04288	2.27544	1.45976
4930503L19Rik	1.69714	2.65311	2.40707	3.52598	3.99798	4.32566	2.86007	2.31378	1.07944	2.9957	2.97572	3.07679	4.77859	3.69201	2.54342	2.11586	2.12369	2.87784	2.20069	2.69078	1.25914	2.86087	2.65411	2.94923	2.47004	0	1.67162	2.24769	2.66337	2.54586	2.72664	2.16775	2.82334	3.37323	2.27544	1.45976
4930513N10Rik	7.92865	7.98495	8.15513	7.70488	7.98192	8.30952	8.17484	7.94986	7.88196	8.07085	8.09229	8.06008	8.42968	7.83011	7.81363	7.93881	7.72027	8.08926	7.83422	7.95934	7.93174	7.95846	8.08228	7.78415	7.97435	7.96878	8.6156	7.49955	7.43288	7.94253	8.1911	8.09524	8.16323	7.87683	7.40959	7.78024
4930519G04Rik	2.56893	0.612609	2.15159	2.69784	0	4.02161	0	4.63408	2.44702	2.37454	0	0	0	1.17325	1.14236	1.53874	1.81498	1.44993	2.67705	2.69078	1.92107	0.650307	3.03912	2.83028	2.96548	3.34435	2.42531	3.0872	2.07076	1.49305	2.72664	1.5831	1.73885	4.30188	4.80168	2.17033
4930520O04Rik	2.19791	0	1.84092	1.24615	1.92915	0	0	0	0	1.26017	0	0.948355	0	1.17325	2.54342	1.2804	1.42171	2.98692	1.9991	2.29207	2.99415	2.74309	2.53935	1.78444	1.70942	0	2.91784	3.0872	2.39728	2.38808	2.72664	2.99755	2.38069	2.85626	0	2.17033
4930523C07Rik	6.49593	6.48134	7.10712	6.01286	5.88358	6.34016	5.70973	5.48189	6.45666	4.98619	5.44533	5.62477	5.88714	6.22989	6.6784	5.51656	5.33832	5.67882	7.00106	7.28655	6.60219	6.6452	6.87629	6.65289	6.45989	5.47554	7.04595	6.01651	5.22028	5.79299	6.1546	6.41508	6.59761	6.65623	5.30065	6.03943
4930526I15Rik	4.73148	4.28657	4.87805	3.68833	3.49789	5.86184	4.70277	4.63408	4.79271	4.45474	4.83116	3.98866	3.15934	4.56031	4.42802	3.97883	4.08328	3.64919	4.86673	4.56108	4.666	4.34788	4.37395	4.63444	4.81985	4.43313	4.44389	5.40059	3.67098	3.89857	4.49442	4.80465	4.88362	3.37323	3.11818	3.90738
4930529C04Rik	2.0495	1.86596	2.81261	2.47861	2.917	2.26614	2.24984	2.31378	2.44702	1.92238	2.69893	0.948355	3.15934	1.52746	1.49115	1.53874	2.37784	2.1583	2.20069	1.3556	1.92107	2.61483	1.95901	2.22258	1.70942	3.88117	0	2.24769	2.07076	2.00889	2.24674	1.80535	1.73885	2.85626	0	2.64429
4930539M17Rik	5.18717	5.14512	4.96013	5.42885	5.03683	5.5461	5.40324	6.01234	5.54356	5.46768	5.73295	5.6517	5.24892	5.09855	5.0961	5.40745	5.68288	5.67882	4.89607	4.65335	5.1912	5.76906	5.21333	5.23545	5.30724	4.83137	5.07834	5.11865	5.13523	5.57231	5.4773	5.26406	5.17254	5.48186	5.43483	5.02287
4930549G23Rik	2.77204	3.07147	7.78465	2.59238	2.24623	3.10781	1.80908	4.07788	2.94098	2.9957	0	1.92182	2.65294	2.73299	2.3857	1.53874	2.37784	1.72651	1.9991	2.85522	2.16472	2.31803	1.28923	2.22258	1.32971	3.88117	3.81908	3.0872	2.66337	2.38808	3.43743	1.9979	2.38069	2.04288	0	2.17033
4930550L24Rik	2.45554	3.15952	7.17744	2.9746	2.24623	3.63588	3.75713	5.03452	3.13628	2.9957	1.90558	1.51568	3.15934	1.52746	2.68558	2.74766	2.12369	3.08833	1.76468	3.13671	2.55516	2.14307	2.53935	2.02008	2.47004	4.27152	2.91784	3.61443	3.40643	2.93629	2.24674	2.45714	3.16159	4.0534	0	4.57036
4930558F17Rik	3.89763	4.60152	5.28077	4.60439	3.3731	2.26614	3.61693	3.16087	3.30827	3.4285	3.73981	3.22759	4.07625	3.19514	4.30122	3.74257	3.09687	2.33377	4.1032	4.60795	3.1151	3.25437	3.34273	2.70065	2.81846	5.61684	4.70795	4.7679	2.39728	3.148	3.00431	2.80495	3.37167	3.75304	3.64666	5.02287
4930562C15Rik	5.11432	6.02263	6.3254	5.6552	5.73936	4.57665	5.80973	5.03452	5.5087	6.17307	5.30204	5.59733	5.24892	4.80666	5.89627	5.54628	5.07643	4.78432	5.71581	6.6097	4.62585	4.98883	4.77994	4.80185	5.33456	6.12257	6.89516	5.26649	5.09075	5.69531	5.17471	5.14703	5.17254	6.35997	5.30065	5.64437
4930577N17Rik	2.33247	2.38741	2.15159	3.96675	1.52216	0	0	0	2.11758	0	2.69893	3.22759	3.15934	2.98249	1.14236	2.11586	0	2.1583	2.37754	2.29207	2.99415	1.94392	2.76042	2.83028	1.32971	1.71772	2.09713	0	2.07076	3.71137	2.09688	2.16775	0.952392	3.37323	0	2.17033
4930579G24Rik	4.40485	4.39936	4.25373	4.75859	4.23158	3.10781	5.35991	4.38262	4.31649	4.14917	4.75983	5.56936	3.83022	4.30945	4.25636	4.54774	4.01	4.51967	3.8267	4.41057	4.35821	4.67178	4.67512	5.18786	4.1415	5.23368	4.93107	2.24769	4.73382	4.21283	4.99572	4.97457	4.15635	4.69852	3.11818	2.64429
4930581F22Rik	2.56893	2.38741	2.62404	2.47861	0	0	0	0	1.68994	1.92238	1.24689	1.51568	0	2.04892	0.681414	0.965476	2.12369	1.10744	2.53505	1.3556	2.16472	0.650307	0.56689	1.15214	2.25816	0	2.09713	0	1.64803	1.7739	2.24674	0	2.09517	2.04288	2.27544	2.17033
4930594C11Rik	0.923746	2.06148	3.12881	0.937132	2.917	2.26614	0	0	2.11758	1.92238	0	0.948355	2.65294	1.52746	2.3857	2.4025	3.35539	2.6313	2.20069	2.69078	1.62774	2.14307	2.27817	2.22258	2.96548	2.47983	1.67162	3.0872	3.78704	3.148	3.16357	2.69807	2.24498	4.86225	2.27544	3.00046
4930596I21Rik	2.19791	2.52637	0.895917	2.79611	0.953156	3.10781	3.28757	0	2.11758	2.37454	2.35611	2.71766	0	2.04892	2.3857	3.25918	2.12369	1.9585	2.67705	2.85522	2.55516	1.4375	3.12122	3.34599	1.70942	1.71772	2.69249	3.0872	3.08222	3.41672	3.61333	3.31941	3.16159	2.85626	2.27544	2.64429
4931406C07Rik	3.71259	3.53362	4.31741	3.92392	3.49789	3.63588	3.28757	2.31378	3.72742	2.7183	3.73981	4.35918	3.15934	3.54462	3.83609	3.97883	4.01	4.48289	3.99887	4.11851	4.02934	3.41705	3.53471	3.34599	3.62661	3.34435	3.92668	4.3035	3.99443	3.49621	3.61333	3.80475	3.81671	0	4.3368	5.17043
4931406H21Rik	1.22993	1.37132	2.40707	3.20671	1.52216	0	0	0	0	2.7183	1.24689	1.51568	1.86581	0.70274	2.00668	2.52696	0.879325	0.657472	2.37754	1.73922	0	0	1.54859	1.78444	1.32971	0	1.67162	3.0872	1.04755	0.682524	2.24674	1.5831	1.52113	2.04288	0	3.90738
4931406P16Rik	3.25124	3.07147	3.26422	3.63622	3.08557	3.63588	3.61693	2.31378	3.95157	4.03101	2.97572	3.98866	4.28637	2.98249	3.56886	2.52696	3.23192	3.43488	3.4049	3.66593	4.14749	2.86087	2.76042	3.50978	4.36987	3.88117	1.67162	4.7679	3.89446	3.24325	2.38249	3.521	3.61128	5.00929	3.11818	2.64429
4931408C20Rik	4.40485	3.93391	3.38801	3.52598	2.50602	2.26614	4.21174	2.31378	2.71503	5.32433	4.96405	5.51173	1.86581	3.82573	2.54342	5.51656	4.84318	5.22384	2.80632	3.25923	3.1151	2.61483	2.53935	2.70065	3.22101	3.34435	0	6.38341	5.22028	5.1242	2.38249	1.32025	2.50472	5.75626	5.43483	6.03943
4931431C16Rik	0.923746	1.04127	1.44445	0.937132	0	0	0	0	0	0	0	1.51568	0	0.70274	0.681414	1.53874	0	2.49019	1.9991	1.3556	1.25914	1.4375	2.1274	2.02008	2.00972	0	2.91784	0	2.07076	2.00889	2.09688	0.9986	1.26461	0	2.27544	1.45976
4931440P22Rik	3.10849	2.38741	2.15159	3.20671	0	2.26614	0	0	3.46192	0	0	2.49783	3.53343	2.73299	2.3857	2.26629	2.7817	1.44993	1.9991	2.04197	2.71679	3.41705	2.65411	1.50266	0.81292	3.34435	2.42531	0	1.64803	1.7739	1.92963	2.69807	2.50472	2.85626	0	1.45976
4932414J04Rik	3.03144	3.39539	3.88486	3.63622	3.71911	4.02161	4.00227	2.31378	4.60748	4.03101	3.73981	3.36411	3.53343	3.6202	3.32994	3.45988	3.35539	2.98692	3.13643	3.47686	3.75934	3.9825	4.03584	3.34599	3.53539	3.63759	3.70281	3.61443	2.88794	2.93629	4.36926	3.99737	3.66545	2.04288	3.64666	3.28587
4932415M13Rik	2.19791	1.37132	2.97936	0.543356	1.52216	0	1.80908	0	1.07944	1.26017	2.69893	2.23839	1.86581	2.86313	1.77182	1.75778	0.879325	2.1583	1.48465	1.73922	0.762784	0.650307	2.1274	2.5582	2.00972	3.34435	3.1127	0	2.39728	1.49305	2.09688	1.9979	1.26461	2.04288	2.27544	0
4932438A13Rik	6.25457	5.72367	5.11149	4.91986	4.23158	2.26614	4.89716	4.63408	4.05181	5.16515	5.19793	4.59942	4.28637	4.63509	4.46792	5.14149	3.76476	4.90042	6.35636	6.27413	5.97755	5.18226	5.23193	5.75957	5.30724	5.39934	5.58475	4.7679	4.99746	5.07326	5.17471	5.26406	5.36487	4.86225	5.67069	5.09854
4933404O12Rik	3.55636	2.9777	1.84092	3.73863	1.92915	3.10781	3.8849	2.31378	1.68994	2.9957	3.88097	2.90837	4.28637	2.98249	3.04344	2.4025	4.21954	4.00092	3.13643	2.29207	2.71679	3.75799	3.12122	4.36169	3.0989	2.47983	1.06547	4.3035	2.88794	3.71137	3.49848	3.08499	2.72475	4.0534	3.64666	3.52404
4933408N05Rik	0.534577	1.37132	1.84092	1.50051	1.52216	2.26614	2.24984	0	0	0	1.90558	1.51568	0	1.81162	2.2086	2.26629	1.81498	2.87784	2.20069	2.29207	2.16472	0.650307	2.53935	1.78444	0	1.71772	2.69249	3.0872	3.08222	2.93629	2.82526	1.80535	1.26461	0	2.27544	3.52404
4933412O06Rik	2.67406	2.52637	2.40707	0	2.24623	0	0	0	0	0	1.24689	1.51568	3.53343	0	0.681414	1.2804	2.12369	1.10744	3.03456	1.73922	2.37311	2.31803	0.972806	1.78444	1.32971	0	1.67162	3.0872	1.04755	1.49305	3.16357	3.45689	3.90941	0	2.27544	0
4933417G07Rik	3.25124	3.83041	3.7061	2.88811	3.3731	3.63588	3.61693	3.16087	4.14554	2.9957	4.43292	4.22217	3.83022	3.29076	3.41405	3.52102	3.85122	3.58123	3.55961	3.47686	4.14749	3.25437	3.90289	2.70065	3.62661	4.08951	4.82382	2.24769	3.08222	3.95593	3.99859	3.90428	3.90941	4.30188	2.27544	3.90738
4933421O10Rik	2.0495	1.86596	0.895917	1.50051	0	0	1.17127	0	1.07944	1.26017	1.90558	3.48882	3.15934	0	1.49115	2.11586	2.7817	0.657472	1.13685	1.73922	0.762784	2.14307	1.95901	3.25656	1.70942	1.71772	3.1127	0	2.07076	0	1.52258	1.32025	1.92799	0	0	2.64429
4933427D14Rik	3.55636	4.07644	4.18712	3.78723	3.61274	0	2.86007	4.63408	2.71503	3.4285	0	3.36411	3.15934	3.6202	3.24061	3.10797	2.12369	4.24007	3.13643	3.83307	2.71679	2.96975	3.80693	2.40013	3.0989	0	0	3.0872	3.08222	2.54586	2.72664	2.80495	3.81671	4.30188	4.98785	3.52404
4933434E20Rik	4.95655	4.85988	4.99948	4.36922	5.2994	4.57665	4.77051	4.63408	4.23354	4.92125	4.75983	4.59942	4.63242	3.88821	4.58141	4.6333	4.40247	4.92804	4.6427	4.65335	4.70506	4.50087	4.47108	4.27325	4.74039	4.71044	5.58475	0	3.40643	4.06424	4.86273	4.72523	4.81338	4.30188	4.03261	4.76869
4933439C10Rik	2.56893	2.23363	1.84092	2.35508	2.24623	2.26614	2.86007	2.31378	3.13628	2.7183	3.20786	3.36411	0	2.04892	2.3857	3.45988	3.76476	3.50991	3.32084	3.00282	2.55516	1.09694	3.53471	2.5582	2.25816	2.47983	2.69249	3.61443	3.40643	4.54739	3.23706	3.38978	3.23507	4.30188	2.27544	3.52404
5031425E22Rik	4.77939	4.53723	4.83518	3.20671	3.91088	4.02161	3.8849	4.38262	4.46931	4.14917	4.68478	4.2923	3.15934	4.2151	4.00834	4.14343	4.80036	4.14911	5.08629	5.32106	4.70506	4.22146	5.07597	4.52379	4.20207	3.63759	5.25388	4.3035	4.79054	4.50957	4.30235	4.38965	4.88362	4.69852	4.03261	4.45993
5031425F14Rik	3.25124	2.06148	2.81261	2.07091	1.52216	2.26614	3.0896	0	3.30827	2.7183	0	0.948355	2.65294	3.09273	1.14236	2.52696	1.81498	1.10744	3.55961	3.25923	3.33026	2.14307	3.1989	2.02008	3.33359	2.47983	3.1127	2.24769	0	0	2.24674	1.32025	0	0	0	0
5031439G07Rik	5.65354	5.64959	5.76472	5.35015	6.15396	6.46986	6.34224	6.64813	6.3816	6.62449	6.62211	6.52525	6.17807	6.33457	6.13805	6.63815	6.84767	6.72889	5.44508	5.91273	5.39605	5.73861	5.51612	5.41151	5.88925	5.61684	5.25388	6.5075	6.45004	5.99807	5.33392	5.45669	4.92861	5.83724	7.16122	6.57795
5033406O09Rik	2.0495	0	1.84092	2.69784	2.7261	0	3.46163	0	1.07944	1.92238	2.35611	1.51568	1.86581	2.86313	3.14539	1.2804	1.42171	1.10744	0.677619	1.73922	1.25914	3.16559	1.76835	3.16121	2.25816	2.9759	1.06547	2.24769	3.40643	2.21091	2.09688	2.31969	2.24498	0	4.03261	3.00046
5430405H02Rik	3.25124	3.77574	3.12881	2.79611	2.24623	0	3.0896	0	3.95157	3.22827	2.35611	2.90837	3.15934	2.86313	2.3857	4.06348	3.23192	2.75983	3.8267	4.65335	3.33026	3.338	3.53471	2.83028	3.33359	2.47983	3.43772	3.0872	3.78704	3.95593	4.1958	4.2068	4.26559	0	3.11818	3.52404
5430416N02Rik	4.09985	3.71891	4.74544	4.04878	3.81818	4.02161	4.30608	5.03452	3.84384	4.45474	3.73981	2.49783	2.65294	4.16551	3.32994	3.18555	3.76476	2.98692	3.55961	4.24252	3.1151	3.07099	4.50206	4.59849	3.33359	4.27152	3.92668	4.95391	3.78704	3.71137	4.60958	3.45689	3.49644	5.48186	3.64666	3.90738
5430427O19Rik	3.80808	3.39539	2.81261	4.16368	3.49789	4.02161	4.77051	4.84815	4.23354	4.85324	4.1276	4.22217	4.07625	4.30945	4.21005	4.29115	4.34404	4.51967	4.6427	4.11851	2.71679	2.96975	3.53471	3.91245	3.79337	4.08951	4.64633	5.40059	4.5489	4.25915	4.33619	4.58228	4.68816	5.48186	3.11818	4.34035
5430431A17Rik	1.48237	1.37132	0.895917	1.24615	0.953156	0	1.80908	0	0	0	0	1.51568	0	1.52746	1.14236	1.53874	2.12369	1.10744	1.48465	2.04197	1.62774	1.4375	1.28923	1.50266	2.47004	4.08951	1.67162	0	1.04755	1.14397	1.26591	1.32025	1.73885	0	0	0
5530601H04Rik	4.60424	4.83335	4.25373	4.4008	3.08557	4.57665	5.06844	4.38262	4.14554	5.51247	5.08573	4.65372	4.28637	4.48144	4.42802	4.06348	4.21954	2.49019	4.98068	5.50565	5.1062	3.75799	4.75444	4.17903	4.1415	4.57843	5.12427	5.26649	3.99443	4.25915	5.17471	4.80465	4.33408	4.0534	4.58789	4.34035
5730408K05Rik	3.76112	3.88309	3.79825	3.78723	3.3731	0	5.17228	4.07788	4.14554	4.54373	4.00955	4.54301	4.07625	4.52141	3.32994	4.1818	1.81498	4.55553	5.06061	4.74007	5.29726	4.26484	4.50206	4.89371	3.53539	4.08951	5.61723	0	3.99443	4.81877	5.1933	3.16744	4.33408	5.57924	2.27544	4.57036
5730409E04Rik	1.22993	1.04127	2.40707	2.21998	0	0	2.24984	0	1.68994	1.26017	1.90558	1.51568	0	2.04892	1.77182	1.2804	0.879325	1.72651	1.13685	1.3556	2.16472	1.09694	0.972806	0	1.70942	0	1.06547	2.24769	0	2.21091	0.554109	1.9979	1.26461	0	2.27544	2.17033
5730455P16Rik	3.50028	3.07147	2.15159	3.34301	2.917	0	2.24984	0	2.71503	2.9957	3.73981	3.07679	4.28637	3.88821	2.68558	3.02597	4.51269	2.98692	3.4049	2.69078	3.51745	3.41705	3.2726	3.58519	2.65474	2.9759	2.91784	2.24769	2.07076	4.06424	3.49848	3.08499	3.71765	0	3.11818	2.17033
5730508B09Rik	6.51728	6.18878	6.40083	5.79248	5.9723	5.6592	5.99107	5.48189	5.85235	5.42146	5.4901	5.67814	6.12439	5.98029	5.89627	5.58973	5.72928	5.64593	6.51608	6.33111	6.5602	6.16226	6.50027	6.46603	6.1108	5.54792	6.7851	5.11865	4.79054	5.43783	6.20125	6.29186	6.2794	2.85626	5.15271	5.59297
5830416I19Rik	1.48237	2.23363	2.15159	2.21998	0.953156	2.26614	2.86007	2.31378	2.44702	0	1.24689	1.92182	0	2.58994	1.14236	1.53874	1.42171	1.72651	1.76468	2.04197	2.55516	2.61483	2.65411	1.50266	1.32971	3.34435	1.67162	0	1.64803	1.14397	1.26591	1.32025	1.73885	2.04288	2.27544	2.64429
5830417I10Rik	3.76112	3.59806	2.40707	3.73863	2.50602	3.63588	3.0896	3.16087	3.60077	3.6043	2.97572	3.07679	2.65294	4.11415	2.93373	4.02178	3.35539	3.83575	3.94373	3.25923	3.33026	2.74309	3.4096	3.65685	2.81846	2.9759	2.42531	4.3035	2.88794	4.0111	3.61333	3.24542	3.16159	3.75304	3.64666	3.28587
5830428M24Rik	4.55003	4.07644	4.64974	2.07091	3.3731	4.32566	2.86007	3.69104	3.30827	4.25838	2.35611	0.948355	0	4.16551	3.89582	2.26629	2.37784	2.49019	4.4971	5.14155	4.02934	2.14307	3.70412	3.85267	2.47004	4.08951	4.44389	3.61443	3.67098	3.64316	3.49848	2.99755	4.03815	4.0534	2.27544	4.45993
5830432E09Rik	5.54686	5.30811	5.80969	4.16368	4.36864	4.79038	2.86007	4.38262	4.90418	3.22827	4.96405	4.14845	5.82118	4.52141	5.86672	3.84176	4.88477	4.59052	5.87164	6.38593	5.82632	4.46412	5.74051	5.06153	4.78066	5.39934	6.3933	3.0872	3.54476	4.65523	5.17471	5.59717	5.39724	4.30188	4.3368	4.06658
5830454E08Rik	2.33247	2.23363	1.84092	1.90464	0	0	3.0896	0	1.07944	0	0	2.23839	0	2.73299	1.49115	1.75778	3.09687	1.44993	2.53505	3.13671	1.62774	1.71282	2.27817	1.15214	0	0	1.06547	0	2.66337	2.54586	1.74041	0	2.09517	0	0	1.45976
6030458C11Rik	2.77204	3.32097	3.12881	3.58215	3.91088	3.10781	3.75713	0	3.72742	2.37454	2.69893	2.49783	1.86581	3.46486	3.24061	3.74257	3.23192	3.89293	3.03456	3.00282	2.86212	3.338	3.12122	3.25656	2.25816	3.88117	2.69249	0	3.99443	4.34754	2.50656	2.58263	3.4354	0	2.27544	3.7284
6330407A03Rik	4.20884	4.12099	3.88486	3.46753	4.23158	0	3.46163	2.31378	3.60077	4.3599	3.73981	3.6036	3.15934	3.82573	3.24061	3.88892	3.35539	3.64919	4.29164	4.97275	3.51745	3.07099	4.07757	2.70065	2.65474	3.88117	2.91784	5.11865	2.07076	2.68807	3.99859	3.69785	3.4354	4.69852	4.03261	0
6330418K02Rik	4.20884	3.983	4.74544	4.0881	4.76611	4.57665	3.0896	2.31378	4.60748	2.7183	3.40777	4.07077	3.15934	4.39801	4.6524	3.93457	4.21954	3.7141	4.05198	4.97275	4.70506	3.69594	4.03584	4.95184	4.07827	1.71772	5.48266	0	3.40643	3.41672	4.2677	4.92803	4.63485	3.37323	3.64666	3.52404
6330549D23Rik	1.69714	1.37132	1.44445	0	0.953156	0	1.17127	0	1.68994	0	1.24689	2.71766	0	0.70274	1.77182	2.11586	0	2.98692	1.13685	1.73922	0.762784	0.650307	0.972806	1.15214	1.70942	2.47983	1.06547	0	1.04755	3.24325	1.92963	2.45714	1.52113	3.75304	2.27544	0
6430531B16Rik	2.19791	1.37132	2.40707	0.937132	1.92915	3.63588	0	0	2.71503	2.37454	1.24689	1.51568	0	2.73299	1.49115	1.2804	2.12369	0.657472	1.9991	0.831486	1.25914	0	1.76835	2.22258	1.70942	2.47983	0	2.24769	2.07076	1.14397	1.92963	2.16775	1.52113	3.75304	3.11818	0
6430548M08Rik	7.0093	6.93246	6.8079	5.8622	6.09591	5.9534	5.87274	6.58983	7.03614	5.7554	5.90813	6.48089	6.70244	6.50376	6.74488	5.82613	6.09088	6.19307	6.84429	7.35684	7.14716	6.57799	6.88218	6.57178	7.03522	6.79285	5.5175	7.00533	6.17972	6.23665	6.88344	7.46074	7.24363	5.75626	6.13229	6.40991
6430706D22Rik	4.60424	5.18763	5.21542	5.41345	4.95212	4.97649	4.47804	4.38262	4.60748	1.92238	3.20786	4.2923	4.77859	4.90059	4.99047	3.69029	4.21954	3.89293	5.00782	4.97275	4.78015	4.57168	5.25029	5.32617	4.61233	4.83137	3.92668	5.83891	4.17571	4.25915	4.88577	4.55191	4.52195	4.51379	4.58789	3.28587
6530402F18Rik	4.60424	5.12339	5.24846	4.68355	4.66327	5.5461	4.47804	4.38262	5.00765	4.54373	3.73981	4.2923	5.24892	4.56031	5.04425	2.26629	4.01	4.32563	4.5349	4.18185	4.85152	4.76538	4.70205	4.66951	4.69895	4.27152	4.64633	3.0872	4.5489	3.57156	4.81553	5.40666	5.38114	4.30188	3.64666	4.34035
6720489N17Rik	1.88405	2.23363	3.60766	3.20671	2.50602	2.26614	2.24984	2.31378	2.11758	2.37454	4.23671	0.948355	3.53343	3.46486	2.00668	2.64152	2.12369	2.1583	2.20069	3.00282	2.99415	1.94392	1.95901	2.5582	3.43802	1.71772	1.67162	3.0872	0	2.00889	3.37368	1.9979	2.72475	3.37323	3.64666	1.45976
6820431F20Rik	5.38595	5.34613	5.37355	5.38215	4.90781	5.14132	4.89716	4.63408	5.23788	4.45474	4.83116	4.80532	4.77859	5.01701	4.50675	4.76551	4.71069	4.69067	5.44508	5.64701	5.1912	4.53671	5.6466	5.00773	4.42174	4.27152	4.2912	5.40059	5.22028	4.65523	5.13681	5.08474	5.19113	5.37743	4.03261	5.09854
8030462N17Rik	3.76112	4.43509	4.31741	4.2355	3.71911	3.63588	2.86007	3.69104	4.31649	4.78186	3.58332	4.2923	3.83022	4.48144	3.70865	3.02597	3.57455	3.35573	4.5349	4.30074	5.27147	4.38768	4.90109	4.52379	3.79337	4.94294	4.58195	3.0872	3.78704	3.148	3.6675	4.61202	4.03815	4.30188	3.64666	4.57036
8430429K09Rik	2.67406	2.23363	1.84092	1.90464	2.917	3.10781	2.58698	3.16087	2.44702	2.37454	3.20786	2.23839	0	2.43113	2.81498	2.52696	2.94788	2.87784	1.9991	3.98284	2.86212	2.86087	2.85942	3.58519	2.65474	1.71772	2.69249	3.0872	2.39728	1.14397	2.62079	3.5824	3.00236	2.04288	0	0
9030025P20Rik	0.923746	1.63974	0.895917	2.07091	1.92915	0	0	0	2.71503	0	1.90558	2.23839	3.15934	2.25264	1.77182	1.9479	0.879325	1.72651	1.13685	0	1.25914	1.94392	1.95901	1.15214	1.32971	2.9759	1.06547	0	0	1.7739	1.52258	1.9979	0.952392	2.04288	0	0
9030617O03Rik	3.25124	3.39539	3.12881	4.2355	3.23648	2.26614	3.61693	3.16087	4.31649	3.76098	4.43292	3.9016	2.65294	3.82573	3.70865	4.1818	4.15302	3.94794	2.37754	2.85522	1.92107	2.74309	3.53471	3.43021	3.43802	3.34435	2.69249	3.61443	4.17571	3.95593	3.9557	3.95158	3.61128	3.37323	3.64666	4.45993
9030619P08Rik	2.45554	3.07147	2.40707	2.69784	1.92915	0	0	4.07788	1.07944	0	1.24689	2.49783	0	2.04892	2.00668	0	3.09687	2.1583	1.9991	1.73922	2.37311	3.338	1.95901	3.58519	1.32971	3.34435	2.09713	3.0872	0	2.21091	2.09688	0	2.38069	0	0	2.17033
9030624J02Rik	4.8484	5.12339	4.99948	5.21457	5.73936	5.5461	5.12129	6.01234	5.73664	5.51247	5.02617	5.59733	5.88714	5.09855	5.07041	5.34118	5.77423	5.6292	5.38425	4.3567	5.27147	5.27005	5.37266	5.21185	5.10004	4.94294	4.20834	5.52327	5.73563	5.1734	4.6903	5.22609	4.33408	5.98672	5.30065	4.06658
9130011E15Rik	1.22993	2.06148	2.40707	2.9746	2.7261	4.57665	3.61693	3.16087	3.13628	2.9957	2.35611	4.2923	0	2.98249	3.14539	2.52696	2.12369	1.72651	2.80632	2.50515	2.71679	3.8746	2.1274	2.70065	3.0989	2.9759	2.42531	0	2.66337	2.81751	2.38249	1.32025	2.09517	3.75304	3.64666	2.17033
9130019O22Rik	2.19791	1.37132	0	2.47861	0	0	0	3.16087	1.07944	1.92238	1.90558	2.23839	1.86581	0	0.681414	0.562039	1.81498	2.6313	1.9991	2.69078	2.99415	1.4375	1.76835	1.15214	1.32971	0	1.67162	3.0872	3.40643	1.7739	1.52258	2.16775	0.952392	0	0	1.45976
9130023H24Rik	1.69714	1.37132	0.895917	1.71668	1.52216	0	2.86007	0	2.44702	0	2.69893	0.948355	3.83022	0	2.00668	3.02597	0	1.72651	2.53505	1.3556	1.92107	1.71282	2.53935	2.22258	3.0989	3.34435	3.81908	2.24769	2.66337	2.21091	0.554109	2.16775	2.09517	2.85626	4.58789	2.17033
9130221H12Rik	2.19791	1.63974	2.97936	2.69784	1.92915	0	1.80908	3.16087	2.11758	1.26017	2.35611	0	0	3.09273	2.3857	0.562039	2.37784	2.75983	1.76468	2.50515	2.37311	2.47405	1.76835	2.40013	2.47004	0	1.06547	3.0872	1.04755	2.81751	0.554109	3.75229	1.52113	2.85626	3.11818	3.00046
9130401M01Rik	4.57739	4.69288	4.4369	5.02493	4.66327	4.32566	5.31524	4.38262	4.90418	5.32433	4.96405	5.06775	4.63242	4.80666	4.81593	4.66073	5.2456	5.71098	4.1032	4.86109	4.81628	4.76538	4.77994	4.98006	4.52018	5.23368	5.95884	5.40059	5.13523	5.53515	4.99572	4.95149	4.60745	5.75626	6.35174	5.02287
9230114K14Rik	2.67406	3.15952	0.895917	3.52598	2.24623	0	1.80908	3.16087	3.30827	2.7183	2.35611	2.71766	4.07625	2.98249	3.04344	3.18555	1.42171	3.35573	3.4049	3.66593	4.14749	3.69594	4.03584	4.22691	3.22101	1.71772	2.09713	0	3.40643	4.11549	2.82526	3.521	3.23507	3.37323	4.58789	3.00046
9330020H09Rik	3.94041	3.39539	3.79825	3.40661	3.61274	4.32566	3.75713	3.16087	3.72742	3.4285	2.69893	2.23839	1.86581	2.73299	1.77182	3.02597	1.42171	3.35573	3.4049	4.24252	3.68313	3.81747	4.50206	3.34599	3.33359	0	4.2912	2.24769	2.88794	2.93629	3.9557	2.99755	3.8638	5.14271	3.11818	1.45976
9330133O14Rik	4.24342	4.32516	3.96657	4.0881	4.08013	4.57665	4.00227	4.07788	4.46931	3.6043	4.00955	3.48882	1.86581	2.58994	3.95318	3.88892	4.28313	3.43488	4.1032	5.26367	4.08963	4.63918	4.59118	4.22691	4.20207	4.43313	4.36957	4.3035	4.25847	4.38979	4.33619	4.42359	4.57951	3.75304	3.11818	4.20995
9330151L19Rik	1.48237	1.63974	0.895917	2.07091	1.92915	2.26614	2.24984	0	3.13628	1.26017	0	1.51568	1.86581	3.69201	1.14236	2.4025	1.81498	2.6313	2.37754	1.73922	1.62774	1.94392	2.53935	2.40013	3.22101	2.47983	2.42531	0	1.64803	2.54586	2.82526	2.16775	0.553399	2.85626	2.27544	0
9330159M07Rik	1.48237	1.37132	0	2.59238	1.52216	0	0	4.07788	1.68994	0	0	0	2.65294	0	0	0.965476	2.59385	0.657472	2.20069	2.69078	0.762784	2.61483	2.76042	2.5582	1.70942	0	2.69249	3.0872	0	2.00889	2.24674	1.9979	1.92799	0	2.27544	0
9430015G10Rik	2.0495	2.06148	3.7061	2.69784	2.7261	0	3.46163	0	1.07944	0	2.35611	3.07679	1.86581	2.58994	2.81498	2.4025	2.94788	2.87784	1.13685	3.37214	2.99415	2.14307	3.47351	2.70065	2.96548	1.71772	2.91784	3.0872	2.39728	3.71137	3.16357	2.31969	2.61893	2.85626	4.03261	0
9430016H08Rik	4.8484	4.80633	4.99948	4.4008	5.15526	4.57665	5.01357	4.63408	4.6719	4.62755	3.88097	4.8982	0	4.56031	4.50675	4.104	4.92519	5.20138	4.57173	4.41057	4.45305	4.96272	4.82963	4.56163	4.1415	5.61684	4.2912	3.61443	4.33674	4.78751	4.7417	5.04168	4.68816	4.86225	4.03261	5.17043
9430038I01Rik	5.13288	4.83335	4.37839	4.75859	4.9951	5.14132	4.83522	5.03452	5.10419	5.16515	4.1276	5.3567	5.24892	5.34121	4.90584	4.74002	4.92519	4.87226	5.42509	5.04265	4.81628	4.96272	4.77994	4.7372	4.69895	4.94294	5.58475	4.7679	4.8977	4.30402	5.5512	4.64117	4.76459	4.69852	3.11818	4.34035
9430060I03Rik	2.33247	1.63974	1.44445	1.90464	1.52216	2.26614	2.86007	0	1.07944	2.9957	1.24689	3.07679	3.53343	2.43113	2.2086	2.52696	2.7817	2.1583	3.63116	2.50515	2.99415	3.8746	4.30537	4.02506	3.0989	2.9759	4.12042	0	2.88794	2.21091	2.62079	3.38978	3.61128	0	3.11818	1.45976
9530062K07Rik	6.98906	7.28543	7.31638	7.21652	7.45985	7.36497	8.4832	7.69722	7.20891	7.29707	7.48807	7.43454	7.34277	7.56914	7.05103	7.23434	7.4214	7.34561	7.08626	7.64225	7.82052	7.1864	7.28528	6.91645	7.32121	7.78633	8.33226	7.49955	6.98765	7.28416	8.42922	6.99157	7.35494	7.37847	6.28224	7.78024
9530068E07Rik	7.15262	6.94491	7.14271	6.38857	6.77595	6.69877	7.03582	7.08792	6.64496	6.38058	6.89607	6.94001	6.70244	6.59087	6.93482	6.53817	6.89932	6.80535	7.1906	7.22774	6.98205	7.08717	7.21224	7.0355	6.87703	6.96133	7.79993	6.67566	6.48483	6.48094	7.08597	7.32365	7.19382	6.65623	6.13229	6.65515
9530091C08Rik	2.67406	2.52637	0.895917	2.07091	2.50602	0	2.86007	3.69104	3.46192	2.37454	2.69893	2.23839	2.65294	2.58994	2.93373	2.74766	2.12369	2.49019	2.67705	2.29207	2.37311	2.96975	2.65411	2.40013	2.65474	2.9759	3.70281	0	2.39728	2.81751	3.43743	3.16744	2.61893	3.37323	3.64666	2.64429
9830107B12Rik	6.52433	6.12459	6.29409	5.53227	6.49073	7.39794	6.40753	6.17978	6.57929	5.2732	5.90813	5.62477	6.46395	6.42164	6.16258	5.73874	5.07643	5.03353	6.30259	6.5389	6.08511	6.18502	6.4535	6.06633	6.65668	5.86367	6.86842	5.11865	5.22028	5.88447	6.26413	6.29186	6.31373	5.75626	6.13229	6.25318
9830166K06Rik	4.60424	3.39539	4.79101	4.0881	1.92915	4.02161	4.39462	4.38262	4.05181	3.9023	4.23671	2.71766	4.28637	4.83865	4.58141	4.14343	3.67279	3.18308	4.71033	5.26367	4.45305	3.75799	5.01285	4.27325	3.87004	1.71772	3.70281	4.3035	3.54476	1.49305	5.01674	4.66973	4.43107	0	0	1.45976
9930012K11Rik	2.56893	1.86596	0.895917	2.21998	1.52216	0	0	0	2.94098	1.26017	0	0.948355	3.83022	1.52746	3.14539	0.562039	0	1.72651	1.9991	3.00282	1.62774	3.25437	1.76835	2.02008	1.70942	0	1.06547	0	2.66337	1.7739	2.62079	2.99755	2.24498	2.04288	0	1.45976
9930014A18Rik	1.22993	1.37132	2.40707	1.24615	1.92915	0	1.17127	0	0	2.7183	1.90558	2.23839	3.15934	1.52746	1.14236	2.11586	2.37784	0.657472	0	2.04197	1.25914	1.94392	2.53935	1.78444	0	2.47983	1.67162	2.24769	0	1.49305	0	1.32025	0.952392	0	2.27544	2.17033
9930021J03Rik	5.41657	5.34613	5.07511	5.47408	4.90781	4.57665	4.77051	4.63408	5.00765	4.92125	5.14292	4.2923	5.03284	5.2726	5.01761	4.90966	4.15302	4.65806	5.34223	5.50565	4.98448	5.11273	5.05524	4.95184	4.81985	5.0465	3.92668	5.93044	4.61321	5.07326	4.97439	4.90418	5.26315	5.00929	5.77559	5.09854
9930111J21Rik1	2.56893	2.52637	2.81261	2.21998	0	2.26614	0	0	2.11758	0	0	0.948355	1.86581	1.52746	2.00668	0.562039	0.879325	1.44993	1.13685	2.29207	1.62774	2.31803	1.54859	1.78444	0	2.47983	0	2.24769	1.04755	0.682524	0.554109	1.5831	1.92799	0	2.27544	2.17033
9930111J21Rik2	3.31764	2.76961	4.04389	2.9746	2.24623	4.79038	2.58698	0	2.44702	0	2.35611	2.49783	3.53343	2.04892	2.68558	2.52696	2.59385	2.1583	2.37754	2.50515	3.68313	2.61483	2.41466	2.94923	1.32971	2.47983	2.91784	3.0872	2.66337	2.54586	2.82526	2.69807	2.50472	3.75304	2.27544	4.20995
A130010J15Rik	2.45554	0.612609	1.84092	2.35508	0	0	0	2.31378	1.68994	3.4285	1.90558	0.948355	1.86581	2.43113	2.68558	1.9479	0	2.6313	1.9991	3.57449	1.62774	1.71282	2.27817	2.02008	2.81846	2.47983	2.09713	4.3035	1.04755	2.81751	2.09688	0	0.553399	3.37323	3.11818	3.52404
A230046K03Rik	4.65649	4.66306	4.49312	4.577	4.9951	5.14132	3.75713	4.63408	4.23354	4.78186	4.23671	3.70992	4.07625	4.67107	5.35208	5.30687	5.2456	5.33119	5.20828	5.00812	4.78015	4.82457	4.47108	4.80185	4.65629	4.27152	4.64633	5.52327	5.41325	5.04711	5.03746	4.28274	4.99356	5.14271	5.55758	4.06658
A330032B11Rik	1.69714	1.86596	0	1.50051	1.92915	2.26614	2.58698	3.69104	2.44702	1.92238	1.90558	1.92182	0	1.52746	0.681414	2.74766	2.59385	1.72651	2.53505	3.00282	1.92107	1.94392	3.2726	0.688148	2.00972	0	2.09713	0	2.07076	2.21091	3.37368	3.38978	2.09517	3.37323	3.11818	0
A330069E16Rik	1.88405	2.52637	2.15159	1.71668	3.08557	3.63588	1.80908	0	2.44702	0	1.90558	2.71766	0	2.98249	1.77182	1.53874	1.42171	1.10744	2.80632	3.13671	2.16472	2.31803	3.47351	3.05911	2.65474	1.71772	4.0268	2.24769	0	2.81751	3.91149	1.5831	2.50472	0	0	2.64429
A430005L14Rik	6.43741	6.27999	6.42992	6.04319	5.71385	6.58885	6.97968	4.63408	6.32262	6.4281	6.33362	6.48089	6.37481	5.93661	6.06187	6.00798	6.4368	6.2489	6.01227	6.37242	6.23943	6.26198	6.60385	6.27429	5.90755	6.79285	6.93436	6.56576	6.3592	6.48094	6.51372	6.05252	6.44339	5.98672	4.80168	6.65515
A430035B10Rik	2.0495	2.9777	3.12881	2.35508	0.953156	2.26614	1.80908	4.07788	1.07944	2.9957	0	0.948355	3.15934	1.81162	3.14539	0.562039	0.879325	0	3.03456	3.37214	2.55516	1.94392	3.12122	1.15214	0.81292	2.9759	1.06547	3.0872	0	2.68807	2.24674	2.16775	3.16159	0	0	1.45976
A430046D13Rik	4.34243	3.983	3.50201	4.4317	4.23158	0	4.83522	4.63408	3.46192	3.9023	4.52185	3.80894	3.53343	4.59818	4.11272	4.06348	4.51269	3.89293	4.29164	4.56108	5.24521	3.92956	4.23336	4.17903	4.56699	4.57843	4.87844	3.99972	2.88794	3.148	3.91149	3.90428	4.73956	4.0534	3.64666	3.7284
A430093F15Rik	2.19791	1.37132	1.44445	0.543356	1.92915	0	1.17127	0	0	2.37454	0	2.23839	1.86581	1.81162	3.24061	1.53874	0	0	1.76468	2.69078	3.22668	1.4375	1.95901	1.15214	1.32971	0	3.1127	3.0872	0	1.14397	2.91756	2.16775	2.82334	0	0	0
A530013C23Rik	1.69714	1.37132	2.15159	0.937132	0.953156	0	0	0	0	3.22827	1.90558	2.71766	0	1.81162	0.681414	0.965476	0.879325	0	0	2.50515	1.62774	0	2.1274	0.688148	0	0	1.06547	0	2.39728	0.682524	0.554109	0	1.73885	0	0	2.64429
A530032D15Rik	5.1693	4.85988	4.83518	4.85294	4.15784	2.26614	4.1108	4.38262	4.54005	2.7183	4.00955	3.48882	4.77859	4.83865	4.46792	3.84176	3.46913	3.7141	4.743	5.00812	4.45305	4.34788	4.64768	4.22691	4.56699	4.43313	4.44389	0	3.54476	3.77651	4.76674	4.61202	4.71409	4.69852	4.3368	2.64429
A530064D06Rik	4.27718	4.20615	3.88486	4.2355	3.81818	6.12073	5.26914	4.63408	3.95157	4.3599	3.40777	3.98866	4.63242	5.09855	4.42802	3.88892	3.09687	4.10139	4.37736	3.57449	3.60267	3.8746	3.1989	3.85267	3.7124	5.61684	4.2912	5.26649	3.99443	2.93629	2.82526	3.31941	2.91563	3.37323	4.3368	3.28587
A530088E08Rik	2.0495	2.06148	2.15159	2.07091	1.92915	3.63588	1.17127	2.31378	0	1.92238	3.58332	0	0	1.52746	2.3857	0.965476	0.879325	0	1.48465	0.831486	1.62774	1.4375	0.56689	1.15214	2.00972	2.47983	2.09713	0	0	2.00889	1.92963	2.31969	0.553399	2.85626	0	0
A630001G21Rik	4.77939	4.36274	4.11728	5.50347	4.86211	5.6592	5.52593	4.84815	5.05673	5.46768	5.25092	5.54083	4.28637	5.09855	5.3306	5.27172	4.40247	5.57781	3.8267	5.00812	4.49823	4.90903	5.38932	5.32617	4.78066	6.53242	5.93327	5.74117	4.79054	5.1734	5.50732	5.1871	5.63297	5.26484	6.20921	5.36683
A630033H20Rik	3.76112	2.06148	2.40707	2.79611	2.24623	0	3.28757	0	1.68994	4.25838	3.20786	3.9016	1.86581	2.86313	3.14539	2.4025	3.09687	2.87784	2.20069	2.29207	2.37311	1.94392	2.27817	2.22258	2.96548	3.34435	4.12042	2.24769	1.04755	2.68807	2.24674	3.08499	0.553399	3.37323	4.58789	2.64429
A630066F11Rik	2.33247	2.9777	3.12881	2.21998	1.92915	2.26614	2.24984	0	3.60077	1.92238	3.20786	2.23839	1.86581	2.98249	4.38698	2.74766	3.09687	1.10744	2.92495	3.66593	2.99415	4.22146	3.4096	3.16121	3.0989	2.9759	4.0268	4.5543	2.66337	2.38808	2.24674	3.69785	2.91563	2.04288	2.27544	0
A630072M18Rik	3.25124	2.65311	4.04389	3.46753	3.23648	3.10781	2.58698	3.16087	2.44702	2.37454	2.69893	2.23839	4.07625	3.46486	3.32994	2.64152	2.37784	1.44993	3.03456	3.57449	3.22668	1.94392	3.64983	3.05911	2.65474	2.47983	3.81908	4.5543	2.39728	2.93629	2.91756	3.45689	2.24498	2.04288	4.98785	2.64429
A630089N07Rik	0.534577	2.52637	0	2.9746	1.92915	2.26614	0	0	1.07944	1.26017	1.90558	0.948355	2.65294	1.17325	1.14236	2.26629	2.37784	1.9585	0	0.831486	1.92107	1.71282	1.28923	2.22258	0.81292	3.34435	0	0	3.99443	2.81751	1.52258	1.5831	2.24498	0	3.11818	2.64429
A730008H23Rik	0.534577	2.23363	2.40707	2.35508	1.52216	0	1.17127	0	0	0	0	0	3.53343	1.17325	2.2086	0.965476	1.42171	1.10744	1.9991	2.04197	0	1.4375	1.95901	1.15214	2.81846	1.71772	1.06547	3.61443	2.07076	2.21091	0	0.9986	2.72475	2.04288	0	0
A830080D01Rik	4.1371	3.93391	5.03779	4.63126	3.3731	2.26614	4.70277	4.84815	3.84384	5.04834	3.88097	3.9016	3.15934	4.77394	3.64045	4.14343	3.57455	4.24007	4.6427	4.82187	4.70506	4.38768	4.82963	4.44502	3.53539	4.43313	3.28434	4.7679	3.40643	4.65523	3.7701	3.75229	3.90941	5.00929	4.80168	4.45993
A930005H10Rik	4.24342	3.93391	4.37839	4.4317	3.81818	3.63588	4.89716	3.16087	4.84952	4.25838	3.58332	3.22759	4.77859	2.04892	3.70865	4.1818	4.01	4.14911	4.05198	3.98284	4.08963	3.81747	3.90289	4.07823	4.1415	2.47983	4.93107	4.3035	3.67098	4.65523	4.15845	4.12664	4.66175	0	3.11818	3.90738
A930006K02Rik	2.0495	2.8774	2.81261	2.35508	3.08557	0	2.58698	0	0	2.37454	1.90558	0.948355	2.65294	2.43113	1.77182	3.18555	2.37784	1.10744	2.80632	3.57449	3.33026	2.31803	2.95207	3.50978	1.70942	3.34435	3.28434	3.61443	1.64803	2.21091	3.23706	2.69807	2.38069	0	5.15271	1.45976
A930013F10Rik	3.98195	2.76961	2.62404	3.96675	3.49789	3.63588	3.28757	2.31378	4.60748	2.37454	2.97572	2.71766	4.28637	3.76042	3.24061	2.4025	3.76476	2.98692	3.4049	4.05227	2.99415	1.94392	3.4096	2.70065	2.25816	1.71772	1.67162	3.99972	3.40643	1.7739	3.6675	2.31969	3.00236	0	2.27544	1.45976
A930015D03Rik	5.11432	4.98565	5.51605	4.65764	5.15526	5.14132	5.56461	4.38262	5.10419	3.76098	5.3514	5.3567	4.46974	5.22498	4.81593	4.60534	4.28313	4.40641	5.46479	5.57806	5.16342	5.37277	5.28632	4.80185	4.69895	4.83137	6.29633	5.40059	4.25847	5.26703	5.44665	5.48911	6.03387	5.14271	5.15271	4.76869
A930041C12Rik	3.50028	3.983	4.11728	3.40661	1.52216	0	1.80908	0	0	0	0	0.948355	0	1.52746	2.68558	0	2.94788	0	3.94373	4.05227	4.20313	4.30696	3.2726	1.78444	2.96548	2.47983	2.91784	0	2.66337	0	2.82526	3.521	3.37167	0	0	0
AA465934	2.86379	2.23363	1.84092	1.71668	0.953156	2.26614	2.58698	0	1.07944	1.26017	3.20786	1.92182	0	1.17325	1.77182	0.965476	2.7817	1.10744	2.67705	3.13671	2.37311	1.71282	2.85942	2.5582	1.70942	3.34435	3.43772	2.24769	2.39728	0.682524	2.24674	1.32025	1.73885	0	2.27544	1.45976
AA467197	9.11613	8.79202	9.15478	7.89151	8.23148	8.66141	7.80654	8.69374	8.84438	7.45454	7.58412	8.03473	9.29416	8.63986	8.89884	7.5378	7.77659	7.71813	8.7984	8.91744	8.7582	7.97161	8.69005	8.16207	8.8323	7.67762	9.86943	6.67566	6.43232	6.33722	8.95406	9.07001	9.29455	6.12215	6.05104	6.21968
Aaas	4.31017	4.66306	4.83518	5.31743	5.76442	4.79038	5.80973	4.07788	5.23788	5.46768	6.00386	6.27115	5.82118	5.46936	5.0961	5.85015	5.72928	5.66247	5.23149	4.65335	4.91953	5.73861	5.25029	5.89909	5.73381	5.31889	4.64633	4.95391	5.33913	6.44132	5.70156	5.42353	5.17254	5.91391	5.30065	5.48433
Aacs	4.17342	4.46994	3.38801	3.92392	3.61274	3.63588	4.47804	3.69104	4.54005	3.4285	4.00955	3.70992	5.88714	4.39801	4.58141	4.06348	3.93279	2.98692	3.63116	3.75192	4.666	4.63918	3.47351	4.44502	3.53539	4.27152	3.43772	3.0872	4.84512	4.0111	3.86588	4.55191	4.03815	2.85626	5.15271	4.57036
Aaed1	4.40485	3.93391	3.96657	4.60439	3.99798	4.97649	4.89716	4.38262	5.05673	4.25838	3.73981	3.98866	3.83022	5.07188	4.21005	4.39279	4.15302	4.48289	4.4971	4.3567	4.70506	3.92956	4.56208	4.44502	4.36987	4.27152	5.55152	4.7679	4.61321	4.11549	4.63699	4.99729	4.63485	4.51379	4.3368	4.76869
Aagab	5.35466	5.03304	4.87805	5.54646	5.03683	5.14132	5.35991	4.38262	4.73357	5.79219	4.83116	5.54083	3.15934	4.74046	5.0961	4.88661	5.11189	5.2892	5.64843	5.5302	5.59633	5.7075	4.96918	5.43208	5.75418	5.23368	5.3728	5.93044	5.33913	5.22098	4.88577	5.35482	5.15372	5.48186	5.67069	5.74198
Aak1	4.27718	4.69288	4.11728	4.36922	3.91088	0	2.86007	2.31378	4.46931	3.76098	3.20786	4.59942	3.83022	3.82573	4.21005	3.93457	4.15302	4.19531	4.1032	3.83307	4.20313	3.9825	2.85942	3.72512	3.53539	2.9759	1.67162	4.7679	3.40643	4.11549	3.7701	4.42359	4.15635	3.75304	4.03261	3.00046
Aamdc	4.27718	3.83041	3.50201	4.78277	5.33329	4.79038	4.63168	4.07788	4.14554	2.9957	4.33815	3.9016	4.07625	4.67107	2.81498	4.29115	4.66368	4.55553	5.20828	4.41057	4.35821	4.50087	4.34007	3.85267	4.42174	3.88117	5.71051	3.61443	3.40643	5.09896	4.7417	4.2068	4.63485	3.37323	4.03261	4.67293
Aamp	6.3686	5.90018	5.64573	6.27387	6.26349	6.53058	6.87584	6.17978	6.76795	6.56195	6.38194	6.90687	6.32808	6.24191	6.3873	6.27084	6.49167	6.49036	6.5717	6.25952	6.2788	6.38505	5.86488	6.37335	6.2464	6.90733	6.17064	7.52913	6.7509	6.83447	6.21041	6.48908	6.29667	6.56408	7.08162	6.68
Aanat	2.56893	1.63974	0.895917	0.543356	0.953156	3.10781	1.80908	0	0	0	1.90558	1.51568	0	1.52746	1.77182	0.562039	0.879325	1.72651	1.48465	2.50515	1.62774	1.71282	2.76042	2.83028	0.81292	1.71772	0	2.24769	2.39728	2.00889	2.72664	1.80535	1.26461	2.04288	0	0
Aar2	4.02233	3.83041	4.04389	3.92392	3.61274	2.26614	4.21174	3.69104	4.23354	3.6043	4.52185	3.6036	3.53343	3.6202	2.93373	3.63604	4.28313	3.94794	2.92495	4.11851	3.33026	4.38768	4.15756	4.07823	3.62661	4.08951	3.28434	4.7679	3.89446	3.83883	3.91149	4.16728	3.71765	2.04288	0	3.00046
Aars	4.20884	4.72209	4.31741	5.38215	5.33329	5.5461	5.6748	4.84815	5.82428	5.96325	5.53352	5.8965	4.46974	5.40671	5.04425	5.68632	6.03656	6.43367	4.71033	3.66593	4.54203	5.55856	4.70205	5.21185	5.22206	5.68262	3.28434	6.31712	5.8198	6.1896	4.90844	5.38958	4.52195	6.74285	5.77559	5.30429
Aarsd1	3.89763	5.10133	4.25373	4.78277	4.55253	4.02161	4.77051	3.16087	5.05673	4.62755	4.89914	4.80532	4.63242	3.76042	3.83609	5.06143	5.00279	5.03353	4.57173	3.57449	3.96643	4.96272	4.47108	4.86373	4.74039	4.83137	3.28434	5.40059	4.99746	5.07326	4.52408	4.87994	4.19369	4.86225	4.3368	5.30429
Aasdhppt	4.73148	4.39936	5.46073	4.709	4.08013	3.63588	4.5569	4.07788	4.79271	4.78186	2.69893	5.06775	5.03284	4.63509	4.90584	4.83938	5.48074	4.87226	4.83678	4.93648	5.16342	4.90903	5.0342	4.63444	4.20207	4.71044	6.25563	4.7679	5.13523	5.39699	5.03746	4.97457	4.63485	6.18538	4.58789	4.57036
Aatf	4.09985	4.24692	4.31741	3.34301	4.66327	0	3.8849	5.03452	4.14554	5.10793	5.14292	4.8982	2.65294	4.30945	3.56886	4.42514	4.75622	4.69067	4.15267	4.93648	4.40641	4.22146	4.56208	4.83312	3.94284	4.71044	3.1127	5.63633	5.30059	5.77716	4.30235	4.16728	3.9965	4.69852	4.98785	4.67293
Aatk	4.06161	3.32097	2.40707	3.05619	1.52216	4.79038	3.75713	3.16087	2.94098	2.9957	3.88097	3.6036	5.24892	1.17325	3.70865	2.4025	2.37784	2.75983	3.69933	4.89928	4.25669	4.85328	4.15756	3.91245	3.53539	2.47983	3.1127	2.24769	3.08222	2.93629	3.91149	4.72523	3.95361	2.85626	0	3.00046
AB124611	8.26998	8.00291	8.56235	7.68578	8.24489	8.40991	8.02339	8.14467	8.30904	7.9781	7.88163	7.90644	8.45164	8.37936	8.44099	7.68866	7.95313	7.72602	8.34575	8.44892	8.45153	8.09693	8.00329	7.8158	8.296	7.83053	9.20202	8.15957	7.60089	8.01517	8.25663	8.59898	8.70105	7.50779	7.94751	8.26379
Abat	0.923746	0.612609	0.895917	0.543356	0	2.26614	2.24984	0	0	1.92238	2.35611	1.51568	0	0.70274	0.681414	1.9479	1.42171	1.72651	2.20069	2.29207	0.762784	1.71282	1.28923	1.78444	0	2.47983	1.06547	3.61443	2.88794	2.38808	3.16357	2.58263	0.952392	2.85626	0	0
Abca1	1.69714	2.76961	0.895917	3.34301	2.917	0	1.80908	0	2.11758	2.9957	3.20786	1.51568	0	0	1.14236	2.26629	1.42171	1.9585	1.13685	3.25923	1.92107	1.71282	2.41466	1.78444	2.47004	0	1.06547	3.0872	2.88794	2.68807	0.953469	1.32025	1.52113	3.75304	4.80168	2.64429
Abca13	5.38595	5.36477	5.71829	5.17858	5.11685	2.26614	3.8849	4.07788	5.36022	4.03101	4.60561	3.80894	5.52232	4.80666	4.99047	4.1818	3.35539	3.7141	5.52238	5.57806	5.3226	5.20471	5.6466	5.7099	4.85799	2.9759	3.57635	3.0872	3.25341	2.81751	5.17471	5.473	5.36487	2.85626	0	1.45976
Abca2	4.57739	4.91151	3.79825	4.75859	4.4938	3.63588	4.63168	5.03452	4.46931	4.03101	4.23671	4.80532	4.63242	4.0609	4.00834	4.68764	3.85122	4.84354	4.24678	4.11851	4.20313	5.01447	4.59118	4.83312	3.62661	3.63759	2.42531	5.26649	5.44893	4.84937	3.43743	4.16728	4.92861	4.69852	6.05104	5.23891
Abca3	5.11432	4.46994	4.49312	5.36624	5.90628	3.63588	5.87274	5.19954	5.54356	5.2732	4.89914	5.56936	5.14492	5.60576	5.12134	5.27172	5.65911	4.92804	4.86673	4.41057	4.45305	5.55856	5.42208	5.13865	5.41353	4.57843	3.43772	5.11865	4.84512	4.54739	4.83933	4.48918	4.60745	5.48186	4.3368	5.8334
Abca7	6.31271	5.9129	6.42992	5.85081	5.49175	6.19765	6.22639	6.75809	7.09606	6.38058	6.06433	6.62374	6.12439	6.3896	6.66129	6.18843	6.21019	6.03693	6.68531	6.79327	6.32968	5.92594	6.2945	6.39446	6.12651	6.07437	4.98185	6.77778	6.24206	6.14096	6.27289	6.48908	6.71141	6.24595	7.12197	6.15026
Abca9	4.99764	4.83335	4.18712	4.52062	5.15526	4.57665	5.60228	5.03452	5.5087	5.22018	5.69521	5.3567	3.53343	5.12474	5.55096	5.40745	4.92519	5.15538	4.80619	4.86109	4.91953	4.34788	5.09641	4.56163	4.93139	5.68262	4.20834	3.61443	5.261	4.84937	4.66389	4.58228	3.4354	5.67046	3.64666	5.78842
Abcb10	4.40485	4.83335	5.48866	5.76848	4.95212	0	5.40324	4.63408	3.84384	4.03101	4.68478	3.70992	4.77859	4.80666	3.49353	4.1818	3.46913	4.72257	5.76435	5.26367	5.92888	6.16226	5.40579	5.6231	5.03492	6.3007	5.0309	5.83891	4.48159	5.37613	4.30235	4.58228	4.63485	5.75626	4.58789	2.17033
Abcb1a	1.22993	1.04127	2.15159	2.79611	2.50602	2.26614	2.58698	4.84815	2.44702	2.7183	2.35611	0	0	2.43113	0	2.93903	1.81498	1.10744	1.48465	1.3556	2.86212	1.4375	0.972806	0.688148	1.70942	0	1.06547	3.99972	1.64803	0	1.74041	0.584029	1.73885	0	0	2.64429
Abcb1b	2.0495	2.9777	2.81261	2.79611	3.71911	2.26614	3.28757	4.63408	3.60077	4.70677	5.76973	3.07679	0	3.38044	3.70865	4.21918	4.34404	4.51967	1.9991	3.13671	1.25914	2.47405	2.76042	1.78444	2.25816	2.9759	2.69249	2.24769	2.88794	4.34754	3.00431	2.58263	2.09517	4.69852	0	2.64429
Abcb4	0	2.76961	1.44445	1.24615	3.3731	0	3.46163	2.31378	0	1.26017	0	2.49783	0	2.25264	0	1.2804	1.81498	1.10744	3.13643	2.69078	1.62774	1.4375	1.76835	0.688148	2.81846	4.27152	2.42531	0	3.67098	3.95593	1.52258	0	1.73885	4.30188	3.64666	2.64429
Abcb6	2.33247	2.38741	2.15159	1.90464	3.08557	0	2.58698	4.07788	0	1.92238	3.40777	4.14845	3.15934	2.58994	0.681414	2.74766	2.94788	2.75983	2.53505	0.831486	2.16472	2.14307	1.95901	1.15214	3.43802	3.34435	2.91784	0	3.67098	2.81751	2.50656	2.16775	2.09517	4.0534	3.64666	3.28587
Abcb7	4.4937	5.18763	4.11728	4.96281	4.76611	3.10781	5.40324	4.84815	4.31649	4.92125	5.08573	4.65372	4.77859	4.56031	4.58141	5.08187	4.28313	5.15538	4.4971	4.56108	5.21846	4.08288	4.92414	4.59849	4.69895	4.94294	4.64633	4.5543	4.94844	3.77651	4.99572	4.38965	4.55102	4.0534	4.80168	4.76869
Abcb8	2.67406	2.52637	2.40707	4.33693	4.4938	4.32566	2.58698	3.16087	4.60748	4.03101	5.08573	5.18299	3.53343	4.44032	3.95318	4.66073	5.18029	4.28349	3.69933	3.37214	3.60267	3.81747	3.85571	4.31815	3.87004	2.9759	1.06547	4.7679	4.61321	4.54739	3.81878	3.45689	2.50472	4.30188	5.30065	3.28587
Abcb9	2.0495	1.86596	3.12881	1.90464	0	2.26614	0	2.31378	2.11758	0	1.90558	1.92182	0	2.43113	2.00668	1.9479	1.42171	1.10744	1.48465	0	2.37311	2.14307	2.27817	2.22258	2.96548	0	1.67162	0	1.64803	0	2.24674	2.16775	0.952392	0	0	1.45976
Abcc1	4.20884	4.72209	4.5994	4.8979	3.81818	2.26614	4.00227	3.16087	4.6719	3.76098	3.73981	3.48882	3.53343	4.67107	4.00834	4.21918	4.51269	4.14911	4.57173	3.57449	4.20313	4.73485	3.64983	5.41151	3.79337	2.47983	2.09713	3.99972	4.94844	4.58423	3.08614	2.99755	3.08417	4.69852	3.64666	3.28587
Abcc10	3.03144	3.2425	0	3.27647	3.71911	0	2.58698	0	3.46192	1.26017	2.35611	2.23839	0	2.25264	1.77182	2.4025	2.59385	2.87784	3.8267	3.57449	4.08963	2.96975	3.47351	2.94923	2.65474	1.71772	3.43772	0	3.08222	2.21091	1.92963	2.45714	3.08417	4.51379	0	3.00046
Abcc3	2.33247	2.76961	1.84092	1.90464	3.08557	0	3.46163	4.84815	2.11758	2.9957	3.20786	2.23839	3.83022	2.25264	2.2086	2.93903	3.67279	3.50991	2.92495	3.57449	3.22668	2.74309	3.2726	2.02008	3.33359	2.47983	2.09713	2.24769	2.66337	3.148	2.72664	1.80535	2.91563	3.37323	3.11818	3.00046
Abcc4	4.40485	4.32516	4.74544	5.0649	4.81491	0	5.35991	5.03452	3.95157	4.54373	4.43292	4.2923	4.77859	4.74046	4.06147	4.25561	3.76476	5.33119	4.1032	3.66593	3.22668	5.06443	4.23336	4.86373	4.52018	5.0465	3.1127	4.7679	5.09075	4.47074	3.61333	4.28274	4.03815	5.48186	4.80168	4.34035
Abcc5	6.32083	5.87439	5.71829	6.05316	5.73936	5.86184	4.83522	6.95568	5.95947	4.54373	4.52185	5.06775	4.91131	5.90674	5.83656	5.14149	5.70627	4.92804	6.15262	6.00317	5.99341	5.65954	6.03338	5.53075	5.43892	5.47554	5.3728	4.5543	4.33674	4.54739	5.60771	5.61197	6.10419	5.67046	5.87336	4.57036
Abcd1	5.66634	5.34613	5.48866	6.39642	6.07603	6.40647	6.07384	6.52908	6.45666	5.82806	5.8056	5.62477	6.5479	6.45299	6.32348	5.77684	6.01799	6.29205	5.64843	5.57806	5.39605	6.05512	5.88851	5.65845	6.35709	5.14313	5.5175	5.40059	6.3592	5.53515	5.24765	5.99724	6.14289	4.86225	5.67069	5.42677
Abcd2	6.83322	6.42916	6.68051	6.09237	6.26349	6.89629	6.42866	6.09849	6.73817	5.51247	5.87476	5.8738	6.70244	6.25382	6.74488	6.05008	6.22646	5.9317	6.42842	6.68813	6.5495	6.82987	6.47708	6.59933	6.61273	6.45924	6.29633	7.00533	6.3212	5.85461	6.01533	6.55947	6.69197	5.67046	5.15271	5.8334
Abcd3	4.43508	4.77879	5.1816	5.24968	4.71561	5.42337	4.63168	0	3.72742	4.45474	4.83116	3.48882	4.46974	3.38044	4.00834	4.48774	4.66368	3.7762	4.05198	3.37214	3.96643	5.11273	4.43943	4.31815	4.1415	3.63759	4.0268	4.3035	4.61321	3.71137	4.46413	4.24527	3.95361	5.37743	2.27544	4.76869
Abcd4	0.923746	2.76961	3.38801	2.07091	2.24623	0	2.24984	0	3.30827	0	1.90558	2.23839	0	2.25264	2.81498	3.02597	1.42171	1.72651	0.677619	2.04197	0.762784	2.14307	2.53935	2.83028	1.70942	0	1.06547	2.24769	3.25341	2.21091	0.953469	1.32025	1.73885	0	3.11818	0
Abce1	6.74549	6.76011	6.64373	6.66703	6.98229	7.14958	7.24081	7.3562	7.07239	7.77253	7.72188	6.99362	6.84201	6.96882	6.6784	7.26147	7.19216	7.42045	6.78278	6.65504	6.44954	6.34518	6.28563	6.47597	6.92274	7.39325	7.19328	7.12641	7.22223	7.30086	7.05074	7.18704	6.95376	7.53231	7.53442	7.8143
Abcf1	6.64562	6.58037	5.71829	6.84975	7.08533	6.58885	7.02199	6.70416	6.49277	7.13467	7.23543	6.83819	7.05784	6.60954	6.65266	7.17375	6.80498	7.33534	6.46804	5.55433	6.07022	6.72504	6.02273	6.73796	6.43487	6.42121	4.76705	7.2735	7.02358	7.3972	6.21041	6.16716	5.77524	7.45744	7.30833	7.4014
Abcf2	3.80808	3.983	3.12881	3.96675	3.99798	3.10781	2.58698	3.69104	4.14554	3.9023	4.43292	3.80894	1.86581	3.69201	3.64045	4.6333	3.85122	4.48289	3.32084	3.37214	3.96643	3.338	3.12122	4.36169	3.7124	2.47983	2.42531	4.3035	4.41098	4.54739	3.37368	1.9979	3.81671	4.0534	4.3368	4.57036
Abcf3	4.4937	4.39936	4.64974	4.52062	3.81818	4.57665	3.75713	4.07788	3.84384	3.9023	3.73981	4.54301	2.65294	3.38044	3.64045	4.3597	4.84318	4.44516	4.05198	3.66593	3.90065	3.92956	4.11812	4.52379	3.94284	3.88117	4.51457	4.5543	3.67098	4.25915	4.04025	4.28274	4.11802	3.75304	4.3368	5.53967
Abcg1	4.60424	4.36274	4.31741	5.68115	4.60896	5.28923	4.39462	5.82288	5.05673	5.82806	5.61663	4.94249	4.63242	4.30945	4.9346	4.79055	4.66368	4.14911	4.60765	5.37625	4.98448	3.49199	4.23336	4.63444	4.65629	3.34435	4.20834	5.11865	5.76424	5.31167	3.55705	3.38978	3.16159	6.18538	5.87336	5.74198
Abcg2	2.56893	2.8774	2.62404	3.20671	3.49789	4.97649	3.0896	5.19954	2.11758	2.7183	3.58332	2.71766	1.86581	3.6202	3.49353	1.9479	2.94788	2.49019	4.29164	2.69078	2.55516	2.96975	3.12122	2.22258	3.0989	4.43313	4.44389	3.61443	2.66337	4.38979	3.00431	2.16775	3.00236	3.75304	4.3368	4.06658
Abcg3	1.88405	2.76961	2.81261	3.63622	3.08557	3.10781	3.61693	2.31378	2.11758	2.7183	3.20786	2.23839	0	2.58994	1.49115	3.39603	2.12369	2.1583	3.03456	3.13671	2.86212	2.31803	2.27817	2.5582	2.00972	3.34435	3.1127	0	2.66337	2.38808	3.16357	2.69807	1.73885	3.75304	4.03261	2.17033
Abhd1	4.37398	3.83041	3.26422	4.0881	3.49789	3.63588	4.00227	4.63408	4.54005	3.4285	4.23671	4.85251	3.15934	3.82573	4.50675	4.42514	4.80036	4.28349	3.4049	4.05227	3.96643	4.93612	4.23336	4.27325	4.31608	4.57843	3.92668	3.61443	3.78704	2.54586	3.16357	4.42359	3.00236	2.85626	2.27544	4.94302
Abhd10	3.66237	4.28657	4.4369	5.50347	4.95212	2.26614	4.83522	2.31378	3.72742	3.76098	4.23671	2.71766	4.63242	3.46486	3.24061	3.84176	3.57455	4.40641	4.57173	4.78155	4.81628	4.26484	4.82963	4.22691	3.62661	3.63759	4.44389	5.52327	4.73382	4.30402	4.83933	4.95149	4.33408	5.00929	3.64666	2.64429
Abhd11	4.8484	5.12339	5.4032	5.33388	5.60707	6.03949	5.48618	4.38262	5.00765	5.16515	5.3514	5.32359	5.03284	4.77394	4.9628	5.21734	5.92138	5.95874	5.40481	4.69736	5.27147	5.65954	5.53122	5.32617	4.78066	4.57843	5.3728	5.74117	5.13523	5.57231	5.66208	4.77866	5.6465	5.48186	5.15271	5.36683
Abhd12	5.07646	5.24912	4.91967	5.28395	6.09591	6.27066	5.96238	6.70416	5.64332	5.67888	5.87476	6.33899	5.52232	5.79703	5.51332	6.05008	6.30515	5.20138	4.89607	4.78155	4.54203	5.11273	4.99118	4.98006	5.2794	5.47554	4.70795	6.09774	5.95001	5.72861	4.33619	4.42359	4.66175	5.14271	5.87336	6.11426
Abhd13	4.70692	5.22892	4.83518	4.85294	3.61274	3.63588	3.61693	2.31378	5.10419	4.25838	4.00955	3.80894	4.07625	4.35441	4.11272	4.1818	4.28313	3.43488	5.00782	4.60795	5.27147	3.75799	4.19596	3.50978	4.20207	1.71772	4.44389	3.99972	4.79054	4.0111	4.63699	4.69775	4.95059	4.51379	4.80168	4.20995
Abhd14a	1.88405	1.37132	3.26422	2.69784	2.50602	0	2.24984	0	2.11758	2.9957	3.58332	1.92182	2.65294	2.04892	1.77182	2.64152	2.12369	4.40641	2.53505	2.85522	2.37311	2.61483	2.41466	3.05911	2.47004	4.94294	2.42531	2.24769	4.33674	4.38979	3.61333	2.45714	3.16159	2.04288	0	4.20995
Abhd15	4.09985	3.53362	1.44445	1.71668	3.23648	0	3.8849	4.38262	3.13628	4.14917	4.00955	3.22759	1.86581	3.09273	2.3857	3.02597	3.35539	3.27199	2.92495	2.69078	3.33026	2.14307	2.76042	2.83028	2.25816	2.47983	3.92668	2.24769	2.88794	3.41672	2.62079	2.45714	2.50472	4.51379	3.11818	4.06658
Abhd16a	5.78844	5.72367	5.87463	5.85081	5.55057	6.19765	6.15213	5.19954	5.79565	5.51247	5.65646	6.0049	5.52232	5.71322	5.65833	5.21734	5.92138	5.75791	5.82663	4.89928	5.99341	5.54102	5.74051	6.2969	5.85193	5.61684	5.85371	5.93044	4.8977	5.09896	5.90691	5.93976	6.33894	5.00929	4.98785	5.64437
Abhd16b	6.37641	6.11361	6.40083	5.82776	5.11685	6.27066	6.04678	6.70416	6.36221	6.5831	6.20525	6.4658	5.88714	6.80843	6.04878	6.18843	6.66877	6.28138	6.83675	7.34305	6.98205	6.2295	7.8849	7.6976	6.02956	6.63567	6.37442	7.97841	6.7509	7.09922	7.68062	7.71831	7.6784	7.91463	7.44183	7.02842
Abhd17a	5.53295	5.97489	5.48866	5.85081	5.83709	5.5461	6.20206	5.92072	5.79565	5.59807	6.30885	6.56829	5.95021	5.60576	5.65833	5.83819	5.88085	5.59514	5.97151	4.93648	5.87851	6.26198	5.72747	5.80759	6.17264	6.16921	6.50167	4.7679	5.99897	6.05168	5.44665	5.92798	5.7875	5.75626	5.67069	6.00051
Abhd17b	4.93556	5.05616	4.74544	5.35015	5.0774	4.57665	5.22152	4.07788	5.00765	4.54373	4.89914	4.42309	4.46974	5.09855	4.68662	5.2357	4.66368	5.13182	4.86673	5.55433	4.74309	5.3528	5.7143	5.6051	5.4884	5.31889	5.5175	4.95391	4.41098	5.497	5.01674	5.1058	5.41315	5.57924	5.30065	5.59297
Abhd17c	5.25652	5.64959	4.5994	5.38215	5.2994	3.63588	4.63168	4.07788	4.84952	4.45474	4.83116	4.94249	4.63242	4.52141	4.42802	5.12189	5.42545	4.87226	5.27681	4.24252	4.666	5.46865	4.805	5.00773	4.65629	4.43313	5.07834	3.61443	4.67477	4.75556	4.36926	5.33712	4.57951	5.48186	5.77559	5.23891
Abhd18	2.86379	2.06148	1.44445	2.9746	0	0	1.80908	3.69104	0	1.92238	1.90558	0	0	1.17325	2.81498	0.562039	1.81498	3.08833	2.53505	2.29207	2.99415	2.74309	1.54859	3.50978	2.65474	2.47983	2.69249	0	1.64803	1.7739	0.953469	2.69807	1.26461	0	3.11818	2.17033
Abhd2	7.47706	6.95724	6.40083	6.80913	6.96076	7.60976	6.17731	5.60473	6.52801	6.81531	6.42868	6.86145	7.31907	6.79219	7.07707	6.60323	6.12599	6.80535	6.8518	6.7831	6.22606	7.00639	6.63912	6.87198	6.98439	6.07437	6.81341	5.93044	7.09288	6.9936	6.96141	6.79164	7.33001	7.20625	7.23665	6.37989
Abhd4	4.1371	4.66306	4.4369	4.68355	4.81491	5.76408	4.89716	4.63408	4.14554	4.62755	3.58332	4.75653	3.15934	3.82573	3.83609	3.52102	4.61509	4.19531	4.80619	3.9099	4.70506	4.34788	4.34007	4.76989	4.07827	5.74553	3.70281	4.5543	5.17838	4.68945	4.46413	3.95158	4.36714	2.85626	0	4.76869
Abhd5	7.81256	7.62013	7.75621	7.17603	7.1815	6.40647	6.56845	7.2845	7.19802	5.86307	6.42868	6.71594	7.47733	7.09339	7.43511	6.64503	6.30515	6.42401	7.44008	7.46264	7.62051	7.23629	7.73976	7.48764	7.10825	7.06363	8.30261	6.24763	6.06943	5.80864	7.57121	7.89203	8.0328	5.37743	6.05104	5.36683
Abhd8	0.923746	2.76961	0	3.27647	3.49789	0	3.8849	4.07788	2.44702	2.7183	2.35611	3.07679	1.86581	2.73299	3.41405	2.84651	3.23192	2.6313	2.67705	1.73922	1.92107	2.96975	3.4096	2.70065	3.79337	1.71772	2.09713	2.24769	2.66337	2.21091	1.74041	3.08499	2.38069	2.04288	4.58789	2.17033
Abi1	7.44028	7.18935	7.45022	6.97041	6.84806	7.18778	6.82895	7.08792	7.28297	6.95165	6.96112	6.38786	7.24555	7.20806	7.23573	7.13027	7.06224	7.00011	7.02117	7.24267	7.00571	6.82263	7.02232	6.7462	7.29364	6.96133	7.12715	7.00533	6.63177	6.80355	6.80103	6.93386	7.20757	5.48186	6.76236	6.60414
Abi2	1.88405	1.63974	2.97936	2.35508	2.24623	2.26614	1.80908	2.31378	2.71503	2.9957	2.97572	3.70992	2.65294	0	1.77182	3.57968	1.42171	2.49019	2.20069	2.50515	1.62774	2.14307	2.1274	3.34599	2.65474	0	1.67162	3.99972	3.25341	3.148	2.38249	2.58263	1.73885	2.04288	3.11818	3.90738
Abi3	4.09985	3.46616	3.38801	5.93949	5.95063	6.12073	5.63899	5.92072	6.30242	6.1449	5.65646	5.21945	5.82118	5.66049	5.72572	4.71407	5.30807	4.32563	3.8267	3.00282	3.90065	4.98883	4.03584	4.12951	4.78066	4.71044	4.12042	6.31712	4.25847	4.99332	3.16357	3.90428	2.82334	6.18538	6.05104	5.42677
Abl1	4.73148	4.28657	3.12881	5.21457	4.90781	5.42337	5.12129	4.84815	5.10419	5.04834	4.43292	4.54301	5.82118	5.20057	5.26416	4.99833	5.1465	4.28349	4.60765	3.47686	4.30834	3.69594	4.47108	3.25656	3.87004	4.08951	3.28434	5.40059	4.79054	4.50957	3.30699	4.61202	2.24498	4.51379	4.98785	5.17043
Abl2	2.45554	2.76961	1.84092	2.59238	1.92915	4.79038	2.58698	0	1.68994	0	2.35611	1.92182	1.86581	1.52746	2.68558	2.64152	1.42171	3.18308	2.92495	3.00282	1.25914	1.71282	2.27817	3.16121	2.65474	4.08951	0	5.26649	3.25341	3.24325	2.91756	2.45714	3.30498	0	3.11818	2.17033
Abr	5.76483	5.66471	5.03779	5.8622	5.73936	7.02848	5.60228	6.01234	6.10656	5.46768	5.25092	5.48203	5.52232	5.87623	6.00876	4.97667	4.96452	5.89018	5.34223	6.33111	5.79044	5.85674	5.56094	5.88424	5.64932	6.07437	4.98185	5.26649	5.8468	5.1242	5.73999	5.53642	5.76287	4.51379	5.15271	5.17043
Abracl	10.0764	10.0333	10.5169	9.72719	9.84001	9.85035	9.92016	9.75966	9.79118	9.51315	9.74473	9.92556	10.1492	9.87633	9.99871	9.61494	9.5045	9.56579	10.0206	10.3663	9.91798	9.66731	9.97374	9.61465	9.62073	9.69242	10.8695	8.8983	9.15141	9.28422	9.92854	9.86911	10.0769	9.15219	8.53052	9.04901
Abt1	5.18717	4.88592	5.07511	5.04505	5.39878	5.9534	6.07384	5.60473	5.98505	5.22018	5.65646	5.51173	6.27979	5.56809	5.17053	4.97667	4.75622	5.22384	5.03445	4.41057	4.91953	5.52327	5.21333	5.53075	5.16234	6.07437	4.51457	5.52327	5.73563	5.47755	5.30003	4.90418	4.19369	2.04288	4.58789	5.53967
Abtb1	6.83322	6.65042	6.86228	5.50347	6.63359	7.06999	6.44947	6.46566	7.04832	5.63904	6.12236	6.33899	6.80837	6.92479	6.68688	5.95357	6.28975	5.64593	7.16672	7.28655	7.15424	6.68567	7.06961	6.49565	7.25127	7.37347	8.12763	7.23811	6.39622	6.78784	6.4456	7.38523	7.37946	5.83724	7.12197	6.52408
Abtb2	3.61034	3.65975	2.97936	2.35508	2.7261	0	2.58698	0	3.84384	1.92238	3.88097	2.23839	0	3.09273	3.64045	2.26629	2.59385	3.35573	3.63116	3.75192	3.22668	3.16559	2.95207	3.43021	3.43802	3.63759	3.43772	3.61443	3.67098	3.71137	4.76674	4.04176	4.68816	2.04288	4.3368	3.00046
Acaa1a	5.53295	5.26905	5.43225	5.50347	5.86052	6.40647	5.60228	6.32979	6.08307	5.86307	5.90813	5.8035	5.95021	5.99456	5.95361	6.03967	6.30515	5.31035	5.61353	5.26367	5.80849	5.2486	5.46987	5.6231	6.15743	5.74553	6.05683	6.17463	6.24206	5.82413	5.73999	5.61197	5.98146	5.37743	5.15271	5.96052
Acaa1b	0.534577	0.612609	0.895917	1.50051	0.953156	0	0	0	0	0	1.24689	1.51568	0	1.17325	1.14236	0.965476	0.879325	1.10744	2.20069	0	1.25914	0.650307	0.972806	0	0	1.71772	1.06547	2.24769	2.07076	0.682524	0.953469	0.9986	0.553399	0	0	0
Acaa2	5.90101	6.04592	6.26209	6.08267	6.52046	6.12073	6.12651	5.92072	6.45666	6.30621	6.53933	6.77836	5.88714	6.35684	6.22212	6.67224	6.57025	6.87086	5.92955	5.83606	5.86132	5.95272	6.2126	6.10528	6.35709	6.3007	6.81341	7.20183	6.86094	6.59367	6.1546	6.0847	5.92707	6.51569	6.54218	6.37989
Acaca	2.86379	2.65311	0	4.4008	4.23158	5.6592	3.46163	3.16087	2.94098	3.22827	2.69893	2.49783	3.53343	3.69201	3.70865	3.97883	3.09687	4.14911	3.13643	2.69078	4.08963	3.63111	2.85942	3.50978	4.07827	2.47983	1.67162	3.0872	3.40643	4.16498	3.00431	1.80535	3.30498	4.30188	2.27544	3.28587
Acad11	4.55003	4.28657	3.96657	4.68355	4.71561	5.42337	2.58698	3.69104	4.46931	3.9023	4.23671	3.80894	5.24892	3.6202	3.70865	3.57968	4.40247	3.35573	4.29164	4.24252	4.14749	3.41705	4.26981	4.59849	4.69895	3.88117	4.58195	0	2.66337	2.38808	3.61333	3.90428	4.26559	2.04288	3.64666	3.7284
Acad12	1.48237	2.23363	2.97936	2.21998	1.92915	3.10781	3.28757	2.31378	2.71503	2.9957	2.69893	1.51568	1.86581	2.58994	3.24061	3.52102	1.81498	2.6313	1.76468	3.66593	3.1151	2.14307	1.95901	3.34599	3.0989	2.47983	3.81908	3.0872	3.78704	3.04603	3.08614	1.80535	3.08417	3.37323	0	3.28587
Acad8	4.27718	4.69288	4.79101	4.2355	3.3731	3.63588	3.46163	3.16087	4.90418	4.78186	3.88097	4.94249	4.28637	4.26305	4.11272	2.93903	4.45864	4.32563	4.24678	5.2039	4.58455	4.73485	4.82963	4.66951	4.69895	3.63759	4.2912	3.61443	3.25341	3.64316	4.52408	4.31927	4.36714	3.75304	4.03261	3.52404
Acad9	3.94041	4.24692	3.88486	4.0881	4.30174	3.63588	4.39462	3.16087	3.46192	2.7183	4.52185	3.98866	1.86581	3.88821	4.34474	3.88892	4.45864	4.98175	2.53505	3.57449	3.68313	4.22146	4.37395	4.12951	3.43802	3.63759	3.28434	3.99972	3.89446	4.43083	4.1958	3.24542	3.49644	4.0534	5.43483	4.85848
Acadl	5.43164	5.52252	5.4032	5.9287	5.92862	5.86184	6.40753	6.81008	5.93343	5.51247	6.66179	6.4658	6.27979	5.67828	6.21041	6.38214	6.33546	6.55379	5.91529	5.45528	5.87851	5.7075	6.00121	5.97114	6.30281	6.07437	5.5175	5.83891	6.41438	6.45133	5.78969	5.98593	6.11397	6.41377	5.43483	5.96052
Acadm	5.81167	5.97489	5.59525	5.97139	5.52146	6.58885	5.12129	5.48189	5.87989	5.86307	5.76973	5.7296	5.82118	5.64248	6.17468	5.83819	5.75193	5.31035	5.8568	5.94959	6.00911	5.76906	5.45411	5.72665	5.69218	5.61684	5.90723	6.38341	5.22028	5.43783	6.03607	5.95144	6.06443	5.98672	5.15271	4.76869
Acads	2.67406	2.23363	3.26422	2.79611	3.08557	2.26614	2.86007	0	1.68994	3.22827	1.24689	3.48882	1.86581	1.81162	2.54342	1.53874	2.7817	3.08833	2.67705	2.85522	2.99415	2.96975	3.34273	3.34599	3.62661	2.9759	2.09713	0	2.66337	3.24325	3.23706	2.99755	2.72475	2.04288	3.11818	3.52404
Acadsb	5.13288	4.91151	5.59525	5.08448	4.30174	4.02161	3.61693	4.38262	3.72742	4.45474	5.02617	4.2923	4.63242	4.80666	4.21005	4.45678	3.46913	4.48289	5.03445	5.81623	4.54203	4.79528	5.13645	4.98006	4.1415	4.94294	5.16878	4.7679	4.41098	4.87933	4.2677	4.35489	5.50514	2.04288	4.03261	4.57036
Acadvl	4.70692	5.26905	4.5994	4.709	5.11685	5.28923	4.89716	5.82288	5.32058	5.2732	4.89914	5.51173	5.43682	4.83865	4.21005	5.10202	5.2456	5.41166	4.71033	4.41057	4.81628	5.29118	4.82963	4.56163	5.22206	5.14313	5.0309	4.5543	5.55096	5.07326	4.86273	4.90418	4.83718	5.57924	5.55758	4.67293
Acap1	6.14911	6.14631	6.03473	5.61538	6.03543	4.79038	5.48618	6.90876	6.05918	5.16515	4.83116	5.28971	6.46395	6.41104	6.1131	4.79055	5.70627	5.17857	6.45824	7.05244	6.32968	6.07963	6.56037	6.43579	5.77427	6.12257	6.23485	6.24763	5.37667	6.09062	6.49886	6.73193	6.54802	5.14271	5.55758	5.36683
Acap2	7.39486	6.89448	7.26886	7.22095	6.85973	6.58885	6.04678	7.20905	6.62882	6.91875	6.64208	6.163	7.41162	6.7253	6.93482	7.30123	6.54453	6.66467	6.83675	6.9741	6.5495	6.89345	6.47708	6.92373	6.83939	5.61684	5.90723	7.49955	6.84764	6.76394	6.70716	6.36356	6.56948	6.61089	7.16122	6.70442
Acap3	4.68192	3.88309	3.88486	4.30391	4.90781	3.10781	3.61693	4.84815	5.00765	3.9023	4.33815	4.70604	1.86581	4.59818	3.89582	4.02178	4.40247	4.48289	4.4971	4.86109	3.83172	4.26484	4.37395	4.12951	4.61233	4.57843	2.91784	3.0872	3.67098	4.58423	4.7417	4.61202	4.73956	4.69852	4.03261	4.57036
Acat1	6.66488	6.45548	6.17883	6.76128	6.07603	6.69877	7.04952	7.00112	6.92157	7.52181	7.49906	7.15289	7.16807	6.67302	6.83917	7.29248	7.6068	7.35073	6.38769	6.05484	6.57081	6.82263	6.6938	6.77868	6.61273	6.93458	7.47608	7.16461	7.05865	6.95894	6.94505	6.67671	6.59761	7.17543	6.81252	7.52995
Acat2	4.4937	4.43509	2.40707	5.33388	5.55057	5.28923	3.75713	4.07788	4.23354	5.22018	3.88097	5.02719	4.46974	4.74046	4.87649	4.39279	4.96452	5.17857	4.1032	4.97275	4.25669	4.67178	4.50206	4.98006	4.1415	4.94294	5.649	5.11865	4.41098	5.1242	4.66389	4.72523	4.95059	3.75304	5.43483	5.36683
Acbd3	5.25652	5.9627	4.91967	5.56051	5.68789	4.32566	4.95654	6.09849	4.6719	5.37372	4.75983	5.7296	4.63242	5.38521	5.30879	4.93234	5.18029	5.59514	5.50344	5.34892	5.29726	4.90903	4.94684	5.28152	4.96673	4.43313	5.12427	4.7679	5.261	4.78751	5.03746	5.42353	4.95059	5.67046	5.15271	4.57036
Acbd4	3.44193	2.76961	2.97936	2.9746	3.61274	4.02161	3.0896	0	3.60077	4.03101	2.97572	2.90837	0	3.38044	3.24061	2.4025	3.23192	1.72651	2.37754	2.69078	2.37311	3.07099	3.47351	2.5582	3.62661	4.27152	3.57635	3.0872	2.07076	3.33259	2.62079	2.69807	3.49644	2.04288	2.27544	0
Acbd5	4.77939	4.69288	4.25373	4.73401	4.30174	4.32566	5.26914	5.34761	4.90418	5.42146	4.96405	3.9016	4.28637	5.24899	4.50675	5.06143	4.5648	4.84354	4.89607	4.86109	4.98448	4.73485	4.53238	4.07823	4.81985	4.83137	4.44389	4.3035	5.04486	5.07326	4.6903	4.45676	4.15635	3.75304	6.05104	5.53967
Acbd6	5.75288	5.55535	5.80969	5.54646	6.03543	6.12073	6.04678	6.25673	5.6751	4.98619	5.39913	6.0049	6.17807	5.84507	5.86672	5.72581	5.72928	5.59514	5.46479	5.34892	5.48851	6.09173	5.61861	5.58687	5.90755	5.68262	4.64633	5.40059	5.55096	4.68945	5.56553	5.77861	5.81172	5.37743	4.03261	5.30429
Accs	1.48237	0.612609	2.62404	2.47861	3.3731	0	3.75713	0	0	1.26017	3.40777	0	0	2.43113	2.3857	2.52696	2.37784	2.6313	1.76468	2.29207	2.71679	2.47405	2.53935	1.78444	1.32971	1.71772	2.09713	0	2.66337	2.00889	2.09688	2.16775	2.50472	2.85626	2.27544	0
Acd	5.5189	5.90018	5.31236	5.68115	5.90628	4.97649	5.74384	6.64813	5.9069	5.46768	5.94075	5.77928	5.95021	6.19324	6.06187	5.54628	5.72928	5.33119	5.73217	5.5302	6.02463	5.96593	5.3558	5.86923	5.81362	4.71044	5.41036	6.01651	4.8977	5.07326	5.7273	5.473	5.57755	5.75626	5.30065	4.85848
Ace	3.31764	3.83041	2.40707	5.89583	6.33215	6.40647	6.44947	7.08792	6.78261	5.67888	5.25092	5.62477	4.77859	6.37877	4.81593	4.74002	4.75622	4.72257	3.69933	0.831486	3.1151	3.338	2.53935	3.96985	2.96548	0	2.69249	5.11865	4.79054	4.11549	1.74041	2.31969	1.52113	5.26484	6.48145	5.74198
Acer3	6.42992	6.76011	6.45845	6.53094	6.82442	7.02848	7.29932	7.08792	6.76795	6.77911	7.05351	7.10498	7.05784	7.08675	6.87672	6.83157	6.62035	6.25981	6.58076	6.43874	6.74959	6.61199	6.51553	6.48585	6.62384	7.29152	7.78571	5.83891	5.92489	5.95651	6.90615	6.60456	6.59761	7.01064	6.41805	6.7753
Acin1	7.70503	7.73206	7.75045	7.97255	7.45985	7.33123	7.68891	7.4245	7.59684	7.71621	7.67418	7.51006	7.88497	7.73131	7.47482	7.60641	7.14159	7.38102	7.21409	7.31508	7.16128	7.73758	7.16463	7.93949	7.29364	7.67762	4.87844	7.86698	7.35979	7.76534	7.58886	7.23562	7.35906	7.91463	7.83065	7.79168
Ackr1	2.33247	1.63974	2.97936	0	0	0	2.86007	0	3.13628	0	0	0.948355	0	2.25264	1.14236	1.53874	1.42171	0.657472	3.23158	3.00282	1.92107	0	0	0.688148	3.33359	4.71044	3.57635	3.61443	3.99443	3.49621	0.953469	1.32025	1.52113	3.75304	0	0
Acly	6.50309	6.55624	6.55406	6.83826	6.76357	7.14958	6.69588	6.90876	6.81149	6.85062	6.99258	6.77836	7.16807	6.63709	7.04445	6.67896	6.62035	6.67285	6.14041	6.10471	6.08511	6.94103	6.79732	6.63525	6.74075	6.16921	5.41036	7.20183	6.98765	6.63816	6.57169	6.69767	6.75578	6.12215	6.48145	6.65515
Aco1	4.37398	3.59806	4.49312	4.12639	4.30174	4.57665	3.8849	2.31378	4.31649	3.4285	4.52185	4.35918	4.28637	4.35441	4.25636	4.76551	4.96452	4.48289	3.99887	3.66593	4.20313	4.08288	3.64983	3.91245	4.01215	2.47983	2.91784	3.99972	5.261	4.90869	2.72664	2.90446	3.00236	5.14271	4.80168	5.64437
Aco2	6.41483	6.51511	6.4725	6.88925	7.10508	5.42337	6.74723	7.20905	6.76795	7.21815	7.16815	7.31328	6.80837	6.83247	6.94192	7.06504	7.31893	7.26126	6.20044	5.71282	6.58134	7.26862	6.54558	6.9596	7.01003	6.85123	6.3359	6.62176	7.49393	7.28975	6.53573	6.52861	6.41205	6.9753	6.60045	6.88621
Acod1	2.95005	2.52637	2.62404	2.79611	3.23648	4.97649	2.58698	4.63408	4.46931	4.14917	3.20786	3.07679	3.53343	3.6202	3.89582	3.97883	3.09687	4.00092	3.4049	3.66593	3.42689	1.94392	4.26981	2.40013	2.96548	2.47983	3.1127	5.11865	4.41098	4.34754	3.37368	4.64117	3.90941	5.14271	2.27544	2.17033
Acot1	5.18717	4.75072	5.28077	0.543356	1.52216	3.10781	1.80908	4.38262	3.84384	4.85324	4.00955	4.98546	3.15934	3.29076	2.93373	4.54774	4.21954	4.78432	4.6427	5.32106	5.01588	3.69594	3.03912	3.25656	4.20207	4.71044	4.12042	4.95391	5.55096	4.90869	3.61333	4.12664	2.82334	5.14271	5.87336	5.17043
Acot10	3.55636	3.53362	3.50201	2.9746	1.92915	3.10781	2.24984	3.16087	1.68994	3.9023	2.97572	2.71766	3.15934	2.98249	3.64045	3.74257	2.94788	2.6313	3.03456	3.83307	2.99415	3.07099	3.64983	2.83028	2.65474	3.88117	4.0268	3.61443	3.40643	2.81751	3.7701	3.31941	3.55501	2.04288	4.80168	3.52404
Acot11	3.10849	1.04127	0	2.88811	2.7261	3.10781	2.24984	2.31378	3.13628	3.6043	3.20786	0.948355	0	2.58994	3.64045	2.26629	3.46913	2.33377	0.677619	2.69078	3.33026	1.71282	2.1274	2.02008	2.47004	3.88117	2.69249	2.24769	3.08222	3.04603	1.52258	2.58263	1.73885	4.69852	2.27544	2.17033
Acot13	5.60119	5.43702	6.29409	5.5882	5.0774	6.03949	5.26914	5.60473	5.23788	5.42146	5.97265	5.14559	4.63242	5.3187	5.35208	5.42355	4.92519	5.17857	6.01227	5.77575	5.55417	6.00483	5.94596	5.6051	5.38768	5.61684	6.37442	4.95391	4.5489	5.22098	5.66208	5.33712	5.07586	4.86225	5.77559	4.57036
Acot2	3.85355	3.46616	3.88486	2.79611	2.917	4.97649	2.58698	4.63408	2.71503	4.03101	3.20786	3.98866	0	2.43113	3.56886	3.45988	4.61509	4.00092	3.8267	4.18185	3.51745	3.41705	3.47351	3.25656	2.65474	4.27152	3.43772	4.5543	3.40643	4.72289	3.49848	2.58263	3.16159	2.85626	4.80168	4.06658
Acot5	2.45554	2.23363	0.895917	1.71668	1.52216	2.26614	2.24984	3.16087	1.68994	1.26017	1.90558	1.92182	0	1.81162	2.68558	2.64152	0	2.1583	2.80632	2.69078	2.16472	0.650307	2.85942	2.5582	1.70942	0	1.06547	3.0872	3.08222	2.93629	3.6675	3.45689	2.24498	3.37323	0	3.00046
Acot7	5.99531	5.99895	6.05355	6.18597	6.36529	6.75074	6.3198	6.01234	5.95947	6.47411	6.49608	6.70312	6.62724	6.34575	6.44842	6.43074	6.45072	6.70514	6.07776	6.2148	6.23943	6.30418	5.88851	6.40491	6.64582	6.16921	6.48416	7.20183	7.03537	7.14926	6.11616	6.10576	6.08445	6.9019	6.99738	7.06661
Acot8	4.20884	5.48893	4.74544	4.4317	4.66327	5.28923	5.17228	4.07788	3.84384	3.22827	4.33815	4.2923	4.77859	5.22498	5.07041	4.86319	4.75622	4.28349	4.57173	5.00812	5.29726	4.38768	4.77994	4.98006	4.65629	2.9759	5.25388	5.11865	3.40643	4.30402	4.86273	5.28267	5.11532	2.85626	3.64666	4.85848
Acot9	5.40134	4.91151	5.24846	5.28395	5.15526	5.42337	4.63168	4.84815	5.64332	5.46768	5.53352	5.67814	5.03284	5.67828	5.56942	5.58973	5.33832	5.54251	5.40481	5.79614	5.37198	5.29118	5.48545	4.95184	5.22206	5.86367	6.77073	4.5543	5.17838	5.55385	6.02574	5.44021	6.05432	5.14271	5.67069	5.78842
Acox1	4.37398	3.83041	5.03779	3.63622	4.81491	3.10781	3.8849	4.38262	4.6719	4.3599	4.52185	4.4843	4.46974	4.2151	4.78468	4.02178	4.15302	4.84354	4.67691	3.98284	3.60267	4.53671	4.40706	4.59849	4.85799	3.34435	4.36957	3.61443	5.37667	4.21283	4.86273	5.12656	4.81338	5.57924	4.03261	3.7284
Acox3	5.22226	5.32724	5.4032	5.50347	5.63452	5.6592	5.63899	5.19954	5.9069	4.62755	5.08573	5.4517	5.60304	5.50967	5.65833	5.42355	5.5599	4.81424	5.32075	5.2039	5.41973	5.20471	5.0342	5.28152	5.2794	5.54792	4.12042	5.52327	5.261	5.1242	5.11748	5.37231	5.38114	5.37743	4.98785	5.09854
Acp1	4.91426	4.93665	5.21542	4.65764	4.95212	4.57665	4.21174	4.07788	4.23354	4.25838	4.60561	4.59942	4.28637	4.35441	4.87649	4.88661	5.11189	4.48289	5.13633	4.93648	5.01588	4.53671	4.53238	4.66951	4.89516	5.61684	5.44696	4.3035	3.25341	5.33347	5.13681	4.92803	4.78919	4.30188	5.15271	5.02287
Acp2	3.89763	2.9777	4.69838	4.4317	4.43258	4.79038	3.75713	5.03452	4.90418	5.10793	4.1276	4.70604	5.14492	4.0609	4.1622	4.51805	4.15302	4.87226	4.67691	3.98284	3.75934	4.50087	4.19596	4.63444	4.93139	2.9759	4.2912	3.0872	4.41098	4.50957	3.7701	4.24527	4.19369	4.30188	5.55758	3.7284
Acp5	5.50472	5.87439	5.78738	7.67935	7.40513	8.54849	6.7132	6.25673	6.96078	6.99962	6.33362	6.163	6.77392	6.7253	6.10046	5.90852	6.30515	6.15851	5.91529	5.81623	5.69665	6.44286	6.23121	6.81046	6.61273	6.07437	5.82618	7.12641	6.15833	5.66122	6.79496	5.42353	5.53454	6.70019	6.99738	6.70442
Acp6	3.38113	3.39539	3.7061	4.63126	3.61274	0	3.61693	4.38262	5.00765	4.45474	5.44533	4.8982	4.46974	4.39801	4.46792	4.76551	4.15302	4.55553	3.63116	4.30074	4.08963	4.13056	4.53238	4.36169	2.96548	5.31889	3.1127	4.5543	3.99443	5.33347	3.99859	4.35489	3.90941	2.04288	4.98785	3.7284
Acpp	4.75563	4.28657	4.83518	3.92392	4.60896	4.32566	3.8849	4.84815	4.14554	3.4285	3.88097	3.07679	4.63242	3.88821	4.72005	3.02597	3.85122	3.7141	4.77494	4.51264	3.33026	4.4264	4.19596	4.89371	4.78066	3.63759	3.43772	0	2.66337	3.57156	4.90844	5.22609	5.47512	0	3.11818	1.45976
Acrbp	2.95005	1.37132	2.62404	3.05619	2.50602	0	2.58698	2.31378	3.13628	3.9023	1.24689	1.92182	1.86581	1.52746	2.68558	0.562039	3.67279	3.18308	2.37754	4.05227	3.75934	2.47405	3.53471	3.16121	2.00972	1.71772	2.09713	4.5543	3.25341	2.38808	3.16357	2.58263	3.71765	3.37323	3.11818	2.64429
Acsf3	2.45554	1.04127	1.44445	2.69784	1.92915	2.26614	0	2.31378	1.07944	0	2.69893	3.36411	1.86581	2.98249	3.04344	2.26629	2.37784	2.1583	2.20069	0.831486	1.25914	1.71282	2.27817	2.02008	0.81292	1.71772	1.06547	0	2.88794	1.49305	1.52258	1.9979	0.952392	2.04288	0	3.00046
Acsl1	7.32798	7.42521	7.89832	7.03221	7.28037	6.64486	7.16731	6.58983	7.01145	5.93063	6.09363	6.74123	7.5806	6.61878	7.12153	5.90852	6.39424	6.0868	7.1906	7.29373	7.12573	7.12297	7.28973	7.26494	7.02687	7.24873	6.65033	6.9626	6.2008	6.48094	6.78886	6.89809	6.79882	6.05602	6.41805	6.60414
Acsl3	2.19791	3.65975	2.40707	2.47861	3.81818	3.10781	2.24984	0	2.11758	3.6043	1.24689	2.23839	3.15934	1.17325	2.68558	2.93903	3.85122	2.98692	3.13643	1.3556	2.16472	2.74309	2.53935	3.43021	1.32971	3.34435	2.42531	0	3.40643	2.54586	3.61333	2.90446	2.38069	4.51379	3.11818	4.34035
Acsl4	5.43164	5.57149	5.56933	5.19669	5.49175	5.14132	4.95654	4.63408	4.39492	4.85324	5.3514	5.3567	5.43682	4.90059	5.58765	5.54628	4.88477	5.31035	5.64843	5.32106	5.1351	4.79528	5.50087	4.40395	5.36136	5.14313	5.93327	3.99972	5.41325	5.86962	5.17471	5.20673	4.97224	5.48186	4.3368	5.36683
Acsl5	6.73337	6.73166	6.68051	7.0963	7.04499	7.26129	6.49023	6.58983	7.09606	6.91875	7.45458	6.97242	7.05784	6.80033	6.74488	6.79491	7.07128	7.08844	6.89604	6.59814	6.23943	6.94103	6.74001	6.84921	6.8105	6.56766	6.95992	7.20183	7.159	7.1307	6.67447	6.70458	6.8755	7.14395	7.19943	7.19281
Acss1	2.56893	1.04127	3.60766	3.52598	3.23648	3.63588	4.83522	4.38262	4.05181	3.22827	2.69893	2.49783	3.15934	4.16551	2.54342	3.10797	2.94788	1.9585	2.80632	3.83307	2.55516	2.61483	0.56689	3.85267	2.47004	4.27152	3.43772	4.5543	3.40643	2.81751	0.554109	2.31969	2.38069	2.04288	4.98785	2.17033
Acss2	2.95005	4.20615	3.50201	5.00452	4.9951	4.57665	3.75713	5.60473	4.23354	3.4285	4.00955	3.6036	3.15934	3.82573	4.25636	3.79302	3.67279	3.83575	3.8864	4.05227	4.30834	4.57168	3.70412	3.7903	4.56699	2.47983	3.43772	4.95391	2.88794	3.41672	2.82526	4.58228	3.61128	3.37323	4.03261	3.90738
Acta1	1.48237	2.23363	1.44445	0.543356	1.92915	4.79038	0	2.31378	1.07944	1.26017	0	1.51568	2.65294	1.17325	2.2086	0.965476	1.42171	1.44993	1.13685	3.00282	1.25914	2.14307	1.95901	1.15214	2.00972	0	1.67162	3.0872	1.64803	2.38808	1.26591	1.32025	1.73885	0	0	3.28587
Acta2	6.23752	6.23003	6.63125	3.05619	3.81818	5.5461	1.80908	4.63408	4.54005	4.78186	4.96405	5.21945	4.07625	3.82573	4.81593	4.79055	5.00279	5.56027	6.71854	6.58648	6.23943	4.90903	5.05524	4.86373	5.51251	5.47554	5.93327	5.83891	5.67666	6.77195	4.7417	5.26406	5.76287	5.75626	6.48145	6.40991
Actb	13.5782	13.3882	13.3933	12.7577	13.2431	13.2991	12.8697	13.1872	13.2041	13.0852	13.1902	13.1819	13.2828	13.1958	13.4783	13.3112	13.0267	13.0082	13.3251	13.308	13.3035	13.3465	13.3626	13.4128	13.351	12.9874	13.4891	12.7948	13.3251	13.1139	13.2612	13.5756	13.5149	13.2109	13.1323	12.5981
Actg1	10.0089	10.0039	9.9235	9.91182	10.3642	10.4308	10.0655	10.1858	10.1742	10.091	10.0938	10.0884	10.6159	10.3458	10.4246	10.1445	10.2316	10.1716	9.86422	9.80843	9.84663	9.93744	10.0621	9.92967	10.3713	9.93101	10.4998	9.92488	9.9468	9.92382	9.93131	10.1659	10.1176	9.5142	9.95433	9.7462
Actl6a	4.55003	4.50398	3.88486	4.85294	4.81491	5.86184	5.31524	4.84815	4.23354	5.5559	5.4901	5.38907	4.07625	5.3187	4.81593	5.16083	4.92519	5.31035	4.95303	4.74007	4.54203	4.90903	4.94684	5.16347	4.93139	5.68262	4.44389	5.52327	5.22028	5.85461	5.13681	4.92803	5.26315	6.46563	6.35174	6.34924
Actl7b	3.10849	2.52637	3.12881	2.69784	3.3731	0	2.24984	4.63408	3.13628	4.25838	3.40777	2.90837	3.15934	2.86313	3.70865	2.84651	3.23192	3.08833	2.67705	2.50515	2.55516	2.74309	3.1989	2.94923	2.00972	6.53242	4.20834	4.3035	2.39728	2.38808	3.37368	2.69807	2.82334	3.37323	0	3.52404
Actn1	7.6957	7.71036	7.75045	6.73054	7.00349	6.75074	5.93312	7.2845	7.19802	6.47411	6.06433	6.61008	7.80192	6.99034	7.23573	6.43074	6.73848	6.49959	7.75636	7.87083	7.68054	7.4581	7.58561	7.61004	7.74421	7.18207	6.85487	6.77778	6.96318	7.30639	7.61321	8.15708	7.8837	6.30409	7.85479	6.9283
Actn4	7.3794	7.44724	7.30857	7.79379	7.73806	7.14958	6.95077	7.58232	7.13085	7.17702	7.58412	7.75324	7.6004	7.11315	7.67561	7.19267	7.4214	7.40087	7.15463	6.91009	7.08188	7.79049	7.33774	8.02999	7.43914	6.21438	5.29462	7.34178	7.95739	7.65708	7.17281	7.32813	6.93735	7.14395	7.50421	6.96918
Actr10	6.73944	6.6805	6.51386	6.20399	6.28097	6.53058	6.10042	6.58983	6.72305	5.93063	6.28364	6.58235	6.32808	6.31196	6.6784	6.2973	6.47815	6.29205	6.84429	6.92867	6.94173	6.71725	6.75937	6.42557	6.38348	6.49629	7.77135	6.09774	6.46754	6.37977	6.59982	7.12134	6.92074	6.05602	6.76236	5.96052
Actr1a	6.01546	5.76636	5.71829	6.55219	6.57813	6.19765	6.40753	6.32979	5.64332	5.99516	6.25798	6.25368	6.17807	6.16828	6.15037	6.2973	6.49167	6.68099	5.81131	6.0206	6.1573	6.19627	5.95718	5.75957	6.06261	5.68262	6.58614	6.01651	6.02284	6.36925	5.86116	6.33708	6.11397	6.51569	6.41805	5.59297
Actr1b	4.6306	4.91151	3.88486	4.36922	4.9951	5.14132	4.5569	4.84815	4.73357	4.54373	5.39913	4.4843	5.24892	4.77394	4.78468	4.51805	4.75622	4.51967	4.95303	4.11851	4.98448	4.73485	5.0342	4.02506	4.52018	4.08951	4.20834	5.26649	4.48159	5.28952	4.1958	4.52088	4.49229	3.37323	3.11818	4.94302
Actr2	9.19	9.17533	9.19982	8.74051	8.85914	8.98805	8.98897	9.07994	8.84088	9.07565	9.11488	8.99565	9.18696	8.83489	9.04944	9.09388	9.00311	8.98343	9.06057	8.9428	9.07014	9.07919	8.85059	9.06887	8.93848	8.68215	9.41562	8.66504	8.76932	8.70251	9.08422	9.1981	9.24872	8.75373	8.80287	8.77118
Actr3	9.22178	9.20279	9.51193	8.99834	9.05212	9.05159	9.20637	9.66402	9.29658	9.29979	9.16406	9.30858	9.07114	9.36489	9.24154	8.85358	9.08568	8.88468	9.15159	9.47715	9.3436	9.12846	9.28391	9.24196	9.30755	8.98557	10.1587	8.40271	8.61691	8.6643	9.42122	9.64376	9.50413	8.59978	8.77783	8.84444
Actr5	3.38113	2.9777	2.62404	2.9746	3.23648	0	3.46163	2.31378	2.94098	0	1.90558	3.48882	0	2.58994	2.81498	2.11586	2.94788	2.33377	1.9991	3.98284	2.86212	2.86087	2.85942	2.94923	1.32971	0	1.06547	4.5543	3.54476	2.21091	2.91756	1.32025	2.38069	3.75304	0	3.52404
Actr6	5.27335	4.50398	4.64974	4.4008	3.49789	0	4.39462	4.84815	4.73357	4.62755	4.33815	3.70992	4.91131	3.29076	4.21005	3.45988	3.23192	4.14911	5.29895	5.04265	4.88593	4.93612	4.70205	4.7372	4.42174	4.94294	5.82618	4.3035	4.41098	4.34754	5.41533	4.97457	4.83718	2.85626	4.03261	4.06658
Actr8	5.11432	5.32724	4.87805	4.4317	4.9951	4.02161	5.17228	5.03452	4.84952	3.9023	4.83116	4.42309	5.03284	4.39801	4.90584	4.97667	4.28313	4.59052	4.60765	4.41057	5.24521	4.46412	5.01285	5.28152	5.22206	4.57843	4.2912	5.40059	4.94844	4.72289	4.6903	4.87994	4.07864	4.30188	5.67069	5.02287
Acvr1b	3.31764	3.2425	3.38801	3.46753	2.7261	4.57665	2.24984	3.69104	3.72742	2.7183	2.97572	3.48882	3.53343	2.98249	3.24061	3.39603	2.59385	3.50991	3.8267	4.05227	3.83172	2.86087	3.64983	3.58519	3.94284	4.08951	3.43772	0	3.25341	3.41672	2.91756	3.38978	2.91563	2.85626	3.64666	3.00046
Acvrl1	6.17621	5.67968	6.05355	4.8979	6.03543	5.9534	5.84158	6.39932	6.26113	6.02638	6.33362	5.91884	6.66533	6.35684	6.64398	5.67291	6.1771	5.39196	6.41835	6.47712	6.23943	5.44998	6.35514	5.34798	6.8105	5.23368	7.12715	5.83891	5.33913	4.87933	6.43783	7.03064	7.0383	5.00929	5.55758	4.67293
Acy1	2.0495	2.8774	2.15159	2.07091	2.917	3.63588	1.17127	0	2.71503	1.92238	1.24689	3.6036	3.53343	1.17325	2.2086	3.97883	3.85122	3.7762	2.37754	1.3556	1.25914	2.31803	2.76042	0.688148	2.25816	2.47983	1.67162	3.99972	3.78704	3.83883	2.91756	2.31969	1.26461	3.75304	3.11818	3.52404
Acyp1	6.13076	6.05742	6.19587	5.82776	6.17281	6.27066	5.60228	5.60473	5.82428	5.2732	6.28364	6.163	6.27979	6.00869	5.96759	5.53149	5.33832	4.98175	6.26934	6.57473	6.77735	6.21851	6.48485	6.52467	5.94348	5.80581	7.27699	3.0872	4.94844	5.62631	6.46866	5.92798	6.22634	5.57924	4.80168	5.36683
Acyp2	3.61034	3.71891	4.37839	3.63622	3.91088	4.02161	5.48618	3.69104	4.46931	4.3599	3.73981	4.98546	4.28637	3.88821	4.38698	4.29115	4.08328	4.00092	5.23149	4.56108	4.98448	2.86087	3.64983	3.25656	3.94284	5.31889	5.5175	3.99972	4.79054	5.04711	4.2677	4.38965	3.90941	5.57924	6.05104	4.34035
Ada	4.20884	5.00954	4.83518	3.78723	4.08013	3.10781	2.86007	4.63408	3.30827	4.45474	4.23671	3.6036	5.14492	3.54462	3.70865	4.06348	3.46913	4.59052	4.15267	3.75192	3.42689	4.34788	4.26981	4.02506	4.01215	2.47983	3.70281	3.61443	4.08791	4.0111	4.08073	3.80475	4.23009	5.00929	4.58789	2.17033
Adal	3.50028	2.38741	2.97936	2.9746	0.953156	0	0	2.31378	2.94098	3.76098	3.20786	3.36411	3.83022	3.29076	2.68558	3.63604	2.59385	3.58123	1.9991	1.73922	1.25914	1.71282	2.1274	3.05911	1.70942	1.71772	1.06547	0	3.67098	3.41672	2.72664	3.16744	3.08417	2.04288	0	2.64429
Adam10	6.13996	6.14631	5.69451	6.31589	6.03543	7.225	6.22639	6.58983	5.6751	6.28055	6.47396	5.4517	6.73862	6.47351	6.03556	6.43869	6.37977	6.47171	6.21216	5.45528	5.99341	6.59509	6.13568	6.0263	6.28891	6.66851	5.82618	6.38341	5.92489	5.95651	5.86116	5.96303	5.69938	5.48186	6.28224	6.60414
Adam15	5.01775	4.83335	5.28077	4.91986	5.36641	5.14132	5.22152	5.34761	5.7062	5.79219	6.35798	6.06623	5.24892	5.38521	5.51332	5.77684	5.9608	5.75791	4.95303	4.56108	5.39605	5.33255	5.19449	5.34798	5.79408	4.71044	3.70281	4.7679	5.95001	5.07326	5.57973	5.7115	5.22759	5.14271	4.80168	6.00051
Adam17	5.07646	5.24912	5.46073	5.28395	5.11685	5.76408	6.01919	5.03452	5.73664	6.22781	5.84059	5.85075	4.07625	5.87623	5.37325	5.89704	5.11189	5.83288	4.89607	5.10933	5.27147	5.11273	5.26842	4.92307	5.67091	4.94294	4.20834	6.44679	5.70645	5.67837	4.97439	4.97457	5.11532	6.82457	6.48145	5.694
Adam19	5.71643	5.16653	5.99634	5.33388	5.81327	5.6592	4.83522	5.48189	5.43637	5.16515	4.83116	5.51173	4.77859	5.79703	6.1986	5.4708	5.53399	5.39196	5.94367	6.08828	5.6373	4.73485	5.50087	5.25867	5.30724	5.9193	4.58195	6.17463	6.28217	5.91372	5.62149	6.13679	6.02354	5.26484	6.20921	5.48433
Adam1a	2.0495	1.04127	2.97936	1.24615	1.52216	0	0	0	1.68994	0	2.35611	1.92182	3.15934	1.52746	1.49115	1.9479	2.37784	2.33377	1.9991	2.04197	2.37311	1.4375	1.54859	2.40013	2.47004	2.47983	1.67162	2.24769	3.25341	2.00889	2.50656	1.32025	2.24498	2.85626	2.27544	2.17033
Adam8	8.11523	7.59272	7.70356	6.86114	7.52729	8.16378	6.34224	7.66934	7.74643	7.17702	6.77466	6.58235	7.56053	7.71847	7.64547	6.64503	7.46319	7.38601	8.19749	8.63581	7.92348	6.57799	7.92545	7.27067	7.97	7.85926	6.7851	8.41861	8.05323	8.03194	7.76999	8.38307	8.38725	7.60349	8.21331	7.64798
Adam9	3.85355	3.59806	3.50201	3.46753	3.61274	4.32566	1.80908	0	3.95157	4.92125	3.73981	3.98866	3.53343	3.38044	3.64045	4.104	3.57455	4.28349	3.63116	2.85522	3.1151	4.22146	3.2726	3.65685	3.22101	1.71772	3.81908	4.3035	4.25847	2.81751	3.37368	3.08499	3.08417	5.00929	2.27544	4.67293
Adamdec1	0	1.04127	0.895917	8.17789	7.40513	7.84311	5.70973	5.60473	6.19691	4.70677	2.69893	3.80894	5.95021	5.95132	4.46792	3.45988	3.46913	4.00092	0	0.831486	0	3.92956	2.95207	3.58519	2.96548	1.71772	1.06547	3.61443	3.08222	1.49305	2.50656	2.16775	2.09517	3.37323	4.03261	2.64429
Adamts10	3.55636	3.07147	3.26422	3.05619	1.92915	5.14132	3.28757	3.16087	3.60077	1.92238	1.90558	3.36411	3.53343	3.6202	3.14539	3.25918	2.37784	3.35573	2.20069	3.13671	2.16472	1.09694	2.85942	2.5582	2.25816	1.71772	4.12042	3.0872	3.25341	1.49305	3.81878	2.90446	2.50472	2.04288	2.27544	3.28587
Adamtsl3	1.22993	1.63974	2.15159	0.543356	1.52216	0	1.80908	2.31378	2.71503	1.26017	0	1.92182	0	1.52746	1.77182	2.52696	2.7817	1.44993	2.80632	2.69078	1.92107	1.94392	2.41466	2.02008	1.70942	0	1.67162	3.0872	2.88794	2.68807	3.30699	2.90446	2.50472	3.37323	2.27544	2.17033
Adamtsl4	3.25124	1.63974	0	0.937132	1.52216	4.32566	2.24984	2.31378	2.44702	0	1.24689	1.51568	0	1.81162	1.77182	2.11586	0	1.44993	2.20069	1.73922	2.16472	0	2.27817	0	2.96548	2.47983	3.1127	0	0	1.14397	0.554109	1.9979	2.24498	2.04288	2.27544	2.17033
Adap1	5.11432	5.28871	4.91967	5.44408	5.68789	6.12073	5.63899	5.71793	5.32058	5.63904	5.19793	5.8738	5.82118	5.54888	5.53226	5.40745	5.9608	5.45027	4.86673	5.2039	5.39605	5.15945	5.38932	5.49209	5.22206	4.71044	5.21196	4.7679	5.41325	4.72289	5.13681	5.55185	5.17254	5.26484	4.58789	5.36683
Adap2	3.80808	4.07644	3.79825	4.33693	4.15784	3.63588	3.46163	4.07788	5.00765	4.85324	4.23671	4.07077	3.53343	4.52141	3.95318	4.60534	4.40247	4.05203	4.20049	4.82187	4.30834	3.75799	4.40706	3.96985	4.20207	4.57843	3.57635	5.26649	3.25341	3.57156	4.15845	3.80475	4.15635	3.75304	6.05104	4.45993
Adar	5.07646	5.24912	5.37355	5.30079	5.52146	6.03949	5.48618	5.34761	5.87989	5.2732	5.02617	5.6517	5.03284	5.78065	5.72572	5.2894	5.30807	4.69067	5.52238	5.69122	5.69665	5.06443	4.59118	5.65845	5.43892	5.0465	4.44389	6.44679	5.70645	5.5162	5.15589	5.58222	5.69938	5.75626	6.35174	5.59297
Adat2	4.17342	3.77574	4.04389	4.00835	2.7261	2.26614	4.00227	2.31378	3.72742	3.22827	4.43292	3.48882	3.15934	4.0056	4.06147	3.97883	2.7817	4.65806	4.57173	4.05227	4.74309	4.03356	3.90289	3.91245	3.53539	5.31889	4.20834	0	3.89446	3.95593	4.30235	4.24527	3.8638	3.75304	4.80168	2.17033
Adck1	2.19791	2.23363	3.12881	3.52598	3.81818	0	3.46163	2.31378	1.68994	1.92238	3.88097	2.23839	0	2.43113	2.81498	2.93903	3.23192	3.35573	2.80632	2.69078	3.1151	2.31803	3.1989	4.17903	2.81846	2.47983	0	3.0872	2.66337	3.33259	2.09688	2.80495	1.92799	2.04288	0	3.52404
Adck2	4.34243	3.53362	4.49312	4.577	5.11685	4.02161	4.30608	3.69104	4.23354	3.6043	3.88097	4.2923	4.77859	4.95998	4.42802	4.25561	4.08328	4.28349	3.76442	3.57449	3.42689	3.75799	4.96918	4.70375	3.62661	2.47983	4.2912	0	4.61321	3.57156	3.37368	4.24527	4.03815	0	4.80168	3.90738
Adcy3	1.69714	2.76961	2.81261	2.79611	0	0	1.17127	0	1.07944	2.9957	0	3.07679	0	3.76042	2.3857	1.2804	1.42171	1.44993	1.13685	1.3556	1.25914	2.74309	2.27817	2.83028	0.81292	2.9759	1.06547	0	0	2.93629	2.09688	2.69807	0	0	3.11818	2.17033
Adcy4	2.19791	1.86596	2.15159	1.71668	0.953156	3.10781	0	0	1.07944	1.26017	1.90558	1.92182	3.53343	0	1.14236	0.965476	1.81498	0	1.76468	2.04197	0.762784	2.31803	2.76042	2.40013	2.81846	2.9759	2.69249	0	0	0.682524	3.08614	2.16775	2.82334	0	0	1.45976
Adcy7	5.01775	4.46994	5.43225	5.57442	5.03683	4.97649	5.44531	5.60473	4.90418	5.5559	4.52185	4.94249	4.77859	5.71322	5.26416	5.39116	5.42545	5.2892	5.29895	5.2039	5.01588	5.22682	5.56094	5.25867	5.10004	4.83137	3.92668	4.95391	5.22028	4.93745	5.67537	4.72523	4.78919	5.26484	6.48145	4.94302
Add1	7.00426	6.73883	6.88347	6.77339	6.91673	6.69877	6.25031	6.81008	7.13085	6.2007	6.53933	6.55408	7.67697	6.96882	7.37341	6.51581	6.85815	6.49959	6.85927	6.65504	6.83131	6.88652	6.94553	6.84921	6.99299	6.21438	6.58614	7.16461	7.02358	6.76394	6.78886	7.02513	7.23021	6.18538	6.20921	6.68
Add2	0.534577	1.37132	0	0	1.52216	2.26614	1.80908	0	0	0	1.24689	0	0	2.25264	1.49115	0	1.42171	0	3.55961	3.13671	2.86212	0.650307	1.76835	1.50266	2.65474	4.43313	1.06547	3.61443	3.54476	4.16498	1.26591	0.584029	2.24498	4.0534	3.64666	2.64429
Add3	7.79227	7.54448	7.49221	7.44575	7.52729	7.74403	7.79845	8.01776	7.69311	7.6774	7.28709	7.64349	7.99375	7.61142	7.55574	7.74741	7.6068	7.29348	7.56866	7.42387	7.65084	7.59188	7.06961	7.42744	7.93474	7.45102	7.21467	7.46934	7.93869	7.24442	7.4605	7.51685	7.80142	7.35116	7.80609	7.6097
Adgre1	5.87918	6.05742	5.80969	6.48748	6.09591	7.225	5.44531	5.92072	5.57758	6.47411	6.47396	6.27115	4.46974	5.86074	5.17053	6.56019	6.49167	6.06208	5.29895	5.66928	5.07672	5.46865	5.09641	5.23545	5.67091	5.14313	5.0309	6.67566	6.09217	6.35865	4.95274	4.77866	4.49229	6.12215	6.41805	6.57795
Adgre4	5.13288	5.00954	5.43225	6.50211	6.46038	6.64486	6.29701	6.39932	6.15244	6.68443	5.69521	5.51173	5.60304	6.34575	4.9346	5.86202	5.98012	4.51967	4.98068	4.97275	4.49823	4.82457	4.11812	4.7372	4.4718	2.47983	4.93107	4.5543	5.30059	4.81877	4.08073	4.04176	3.61128	6.30409	6.90791	6.55126
Adgre5	8.0774	8.03528	8.10639	8.33326	8.86204	8.50376	8.23003	9.09049	8.68962	8.53426	8.40442	8.3339	8.33832	8.7575	8.75505	8.15676	8.41719	7.93444	8.00554	7.96386	7.90263	8.18708	7.95653	8.1341	8.49673	8.21093	7.79993	8.40271	8.0061	7.50683	7.70673	7.95721	7.92591	7.77773	8.37228	7.98351
Adgrg1	2.95005	3.53362	2.97936	0.937132	1.52216	0	3.28757	0	2.94098	2.9957	3.20786	3.80894	2.65294	2.86313	2.3857	1.75778	3.76476	4.10139	3.76442	3.57449	3.68313	2.31803	0.972806	2.83028	2.81846	3.88117	1.06547	4.3035	5.22028	5.59053	2.62079	2.16775	3.55501	4.51379	4.98785	4.06658
Adgrg3	7.35984	7.12519	7.45022	7.49047	7.05518	6.98575	6.58736	6.75809	6.64496	6.02638	5.4901	5.94084	6.06863	6.49375	6.86182	5.88546	5.30807	6.04956	7.20239	7.54924	7.08188	7.55303	7.60358	7.57347	7.01848	5.80581	6.37442	6.56576	6.43232	6.24818	7.28102	7.47699	7.511	5.75626	5.67069	5.91938
Adgrg5	4.43508	4.72209	3.50201	5.9287	5.95063	5.76408	6.34224	6.46566	6.10656	5.37372	5.08573	5.38907	5.03284	6.42164	5.69242	4.45678	5.5599	5.35173	4.98068	4.74007	3.83172	5.01447	4.47108	5.03488	5.13152	4.83137	4.12042	5.26649	4.99746	4.47074	4.83933	4.52088	3.55501	4.69852	5.15271	4.94302
Adgrg7	3.66237	4.12099	4.4369	2.9746	3.23648	0	3.75713	4.07788	3.46192	1.26017	1.24689	1.51568	0	3.6202	3.56886	2.26629	2.37784	1.9585	3.69933	4.3567	3.22668	3.25437	3.34273	3.58519	3.22101	3.63759	2.09713	3.61443	3.40643	1.49305	3.55705	2.90446	3.16159	0	0	0
Adgrl4	3.94041	3.88309	1.84092	4.2355	4.30174	4.79038	3.61693	4.38262	3.72742	0	3.88097	4.07077	0	3.76042	3.04344	3.52102	3.57455	4.24007	4.41839	3.98284	4.49823	4.76538	3.64983	3.91245	3.94284	4.71044	3.1127	4.5543	5.04486	5.33347	2.91756	3.521	4.19369	6.05602	4.03261	4.34035
Adh5	6.58625	5.9129	6.03473	6.33236	6.60613	7.02848	6.52987	5.60473	6.78261	6.68443	6.35798	6.52525	6.77392	6.8245	6.33431	6.75729	6.58294	7.0195	6.07776	5.98553	6.46099	6.48015	6.42145	6.44595	6.30281	6.21438	6.50167	6.01651	6.60039	6.72322	6.57877	6.40662	6.30522	6.35997	5.15271	6.68
Adi1	4.1371	3.53362	4.11728	3.73863	3.81818	3.10781	3.75713	0	3.30827	3.9023	4.33815	2.23839	3.15934	3.09273	4.06147	3.63604	4.34404	4.48289	4.05198	2.29207	3.75934	3.9825	4.11812	4.02506	3.79337	4.08951	4.2912	3.99972	4.08791	4.06424	3.16357	2.58263	3.55501	4.0534	5.30065	4.20995
Adipoq	2.77204	2.65311	2.81261	2.07091	0.953156	2.26614	1.80908	0	2.11758	1.26017	2.97572	2.49783	1.86581	2.43113	2.81498	2.64152	1.81498	3.43488	3.03456	3.37214	1.25914	3.07099	3.2726	3.25656	2.25816	2.47983	3.1127	0	3.25341	2.81751	4.40158	3.16744	3.08417	2.85626	2.27544	3.00046
Adipor1	8.60683	8.22067	8.63599	7.89428	8.35211	8.57756	7.94492	8.10359	8.29377	7.9781	8.01014	7.57481	8.59668	8.05444	8.43346	7.66176	7.70874	7.77627	8.79256	8.81129	8.76052	8.26661	8.58004	8.1466	8.56463	8.52068	9.4017	8.44988	8.29295	8.49078	8.08314	8.68546	8.81476	8.12277	8.40534	8.36684
Adipor2	6.55906	6.46416	6.59317	6.26532	6.82442	6.19765	6.25031	6.86027	6.30242	6.60394	6.28364	6.23599	7.02892	6.5528	6.61761	5.87378	6.30515	6.43367	6.32434	6.15292	6.58134	6.81535	6.50792	6.55312	6.5674	6.3007	6.50167	7.16461	6.24206	6.42109	6.36593	6.56708	6.63881	6.24595	6.71038	6.31793
Adk	5.05716	5.34613	5.24846	4.91986	3.23648	2.26614	5.17228	3.16087	4.46931	5.82806	4.1276	4.8982	5.03284	4.83865	4.1622	5.25382	4.75622	4.78432	5.00782	5.14155	4.62585	4.26484	4.82963	4.83312	4.2602	4.43313	5.29462	4.5543	5.09075	5.07326	4.90844	4.85528	4.68816	5.48186	3.64666	4.06658
Adnp	4.57739	4.80633	5.37355	4.52062	4.9951	3.63588	4.21174	5.34761	4.60748	5.16515	4.89914	4.35918	5.03284	3.69201	4.90584	4.93234	4.75622	4.92804	5.08629	4.3567	4.85152	4.63918	4.50206	4.92307	4.65629	5.31889	3.57635	3.0872	5.22028	4.30402	4.58164	4.90418	4.95059	4.0534	4.98785	4.20995
Adnp2	4.34243	3.53362	3.7061	4.577	3.91088	4.02161	4.5569	2.31378	3.46192	3.22827	4.1276	4.35918	3.83022	3.46486	4.1622	4.51805	3.09687	4.51967	4.15267	4.56108	4.49823	4.03356	4.26981	4.7372	4.20207	2.47983	3.28434	2.24769	3.25341	3.57156	3.61333	3.80475	3.8638	0	3.11818	3.00046
Ado	3.18163	2.76961	2.15159	3.27647	3.71911	4.02161	4.00227	5.03452	4.14554	3.6043	4.1276	3.98866	3.83022	3.09273	3.64045	4.1818	4.34404	3.18308	3.76442	3.25923	3.83172	3.63111	3.59342	2.83028	4.07827	3.63759	3.70281	4.3035	4.61321	4.87933	3.37368	3.5824	3.37167	4.0534	4.03261	3.7284
Adora2b	3.71259	4.12099	3.12881	3.52598	4.23158	4.57665	2.24984	3.16087	3.60077	3.76098	4.23671	4.07077	4.46974	3.46486	3.49353	4.32583	4.84318	4.69067	3.23158	3.83307	3.90065	3.75799	2.1274	1.50266	4.2602	4.57843	4.87844	5.26649	4.17571	4.16498	3.43743	3.95158	3.55501	6.05602	4.3368	2.17033
Adora3	1.69714	2.38741	0.895917	3.58215	2.7261	0	0	4.07788	2.44702	3.4285	2.35611	3.07679	3.83022	1.81162	2.54342	2.64152	2.7817	4.19531	3.03456	0	2.37311	0	2.1274	2.22258	2.65474	2.47983	2.09713	3.99972	2.66337	0.682524	3.16357	2.31969	2.61893	2.04288	0	0
Adpgk	9.77562	9.53456	9.87406	8.79649	8.70909	8.99884	8.14961	9.29589	9.05831	8.18591	7.9712	8.32138	9.66699	8.9121	9.19475	7.73778	8.07492	7.86826	9.60686	9.84312	9.88647	8.85622	9.73306	9.30883	9.29544	8.52965	9.88619	8.23332	7.6477	7.45306	9.35261	9.59432	9.72504	7.37847	7.80609	7.12205
Adprh	7.26626	7.37091	7.36239	7.18513	7.36473	7.4617	7.2762	7.64092	7.38258	7.01527	6.96112	7.23532	7.73185	7.30857	7.41993	6.59615	7.09805	6.83484	6.95996	7.29373	7.30805	7.30024	7.11039	7.0355	7.48252	7.06363	7.81401	6.44679	6.58444	7.00723	7.26793	7.38523	7.46974	6.9019	6.71038	6.75206
Adprhl2	4.1371	2.9777	3.38801	3.27647	3.71911	4.32566	2.86007	0	3.13628	2.9957	2.97572	2.71766	2.65294	3.46486	3.70865	3.69029	4.28313	4.32563	3.63116	3.9099	2.71679	2.96975	3.80693	3.58519	3.43802	4.71044	2.91784	4.95391	2.66337	3.77651	3.61333	2.69807	3.23507	2.04288	3.11818	4.20995
Adprm	5.60119	5.30811	5.74169	4.577	3.91088	2.26614	5.12129	2.31378	4.46931	5.5559	4.23671	5.06775	5.60304	5.56809	5.49412	4.60534	5.11189	4.87226	5.82663	6.0206	5.84393	5.03967	5.42208	5.36947	5.33456	6.21438	6.12619	2.24769	4.61321	5.04711	5.75258	5.45669	5.73781	5.57924	5.43483	5.02287
Adrb2	6.45963	6.14631	6.48642	5.69396	6.33215	6.89629	6.29701	6.86027	6.79712	5.82806	5.3514	5.67814	6.37481	6.06387	6.89878	5.88546	6.12599	6.29205	6.88145	6.56288	6.30446	6.9806	7.18386	6.81046	7.38791	7.56004	7.869	7.64175	7.11526	7.30086	6.47627	7.88899	7.55112	6.61089	7.96979	6.88621
Adrbk1	7.65133	7.66595	7.5792	7.9163	7.91075	7.95811	7.79845	8.69374	8.26795	7.6872	8.05553	7.96666	8.10879	7.93373	8.10056	7.55252	7.69126	7.62416	7.88997	8.12561	7.74288	7.91486	7.85221	7.64129	8.09505	7.37347	7.39409	8.41861	8.0061	7.83197	7.9309	7.96011	7.91757	7.71483	8.01333	7.86934
Adrm1	4.8484	4.85988	4.5994	5.36624	5.66145	4.97649	5.31524	5.48189	4.39492	5.2732	4.96405	5.21945	5.34593	5.09855	5.49412	5.21734	5.58535	5.37198	4.71033	5.00812	4.70506	5.31202	4.99118	4.44502	5.38768	4.57843	4.87844	5.11865	5.13523	5.28952	4.86273	4.95149	4.86058	5.37743	5.67069	5.59297
Adsl	4.52214	3.2425	3.26422	4.0881	4.66327	5.86184	4.47804	5.19954	4.60748	4.98619	4.60561	4.59942	5.24892	4.59818	4.34474	5.08187	5.1465	5.17857	4.77494	3.75192	4.666	4.85328	5.07597	4.56163	4.61233	4.71044	3.92668	3.0872	5.8198	5.91372	4.7417	4.35489	4.36714	4.69852	5.67069	5.91938
Adss	7.14806	6.95724	7.4431	7.00678	6.56393	7.11033	7.17982	7.3562	6.70776	6.81531	6.97694	7.11469	7.11401	6.8639	6.99751	6.89068	7.13298	7.06375	7.17871	6.7831	7.05945	7.06279	6.98991	6.93098	7.1318	7.11218	8.1049	7.23811	7.07015	6.8268	7.1155	7.09525	7.14223	6.78429	6.60045	7.04764
Adssl1	6.68388	6.89448	6.77426	7.18059	7.08533	6.75074	6.97968	6.90876	7.18704	6.96782	6.92896	6.76609	7.05784	6.80033	6.76103	6.99673	7.21679	6.80535	6.7103	6.91941	6.81355	7.41542	6.86442	7.36462	7.21499	6.49629	6.86842	7.16461	6.76513	6.45133	6.59284	6.95142	6.75578	6.46563	7.27294	6.49637
Adtrp	4.60424	5.00954	4.99948	5.31743	4.66327	4.57665	4.77051	4.07788	5.64332	3.6043	5.19793	4.59942	5.60304	5.40671	5.62342	3.10797	2.7817	3.50991	3.76442	4.93648	3.83172	4.67178	5.1754	5.03488	4.52018	4.27152	5.44696	0	2.39728	2.54586	5.59379	5.42353	5.22759	3.37323	0	2.17033
Aebp2	4.55003	5.12339	4.31741	5.0649	4.55253	4.97649	5.12129	3.16087	4.46931	4.85324	4.60561	4.59942	2.65294	4.30945	4.81593	4.81517	4.75622	5.10787	5.00782	4.69736	4.14749	4.57168	4.72848	5.30402	4.4718	5.54792	2.42531	4.7679	5.04486	5.14901	4.2677	4.55191	4.30024	5.00929	4.98785	5.09854
Aen	2.45554	2.65311	1.44445	3.27647	2.24623	3.10781	3.0896	2.31378	2.11758	4.25838	3.20786	3.07679	3.15934	2.58994	3.14539	3.79302	3.35539	3.7762	2.92495	2.29207	2.99415	2.47405	2.95207	3.43021	3.43802	3.34435	3.1127	4.5543	4.17571	3.71137	3.61333	3.24542	2.50472	4.0534	4.03261	4.45993
Aes	7.81831	7.87546	7.77901	7.68578	7.7878	8.06461	7.84633	8.35179	8.10834	7.45454	7.95532	8.03984	7.81891	7.96305	8.03566	7.84926	7.90341	7.78763	7.73215	7.92736	7.88573	8.06047	7.84619	7.92868	8.11094	7.72522	7.5024	8.02068	7.84806	7.71638	7.78539	7.87373	8.06086	7.35116	7.53442	7.26026
Afap1	3.85355	3.71891	3.79825	4.75859	3.61274	2.26614	1.80908	2.31378	2.71503	2.7183	2.69893	3.36411	3.15934	2.86313	4.06147	2.84651	2.59385	2.6313	3.69933	4.51264	3.42689	4.50087	4.19596	5.34798	3.79337	1.71772	2.09713	3.99972	2.39728	3.71137	2.62079	2.80495	3.08417	0	3.11818	1.45976
Afdn	4.40485	4.53723	4.87805	5.12286	5.03683	5.76408	3.8849	5.34761	5.00765	4.78186	3.40777	4.59942	4.46974	4.83865	5.37325	4.1818	4.45864	5.00787	3.99887	4.69736	3.68313	3.56322	4.50206	3.72512	4.52018	4.08951	3.92668	4.3035	3.89446	3.95593	4.63699	4.52088	4.60745	2.85626	5.43483	3.28587
Aff1	6.25457	6.18878	6.03473	5.6552	5.49175	5.42337	5.12129	5.71793	6.01019	4.92125	4.96405	5.28971	5.34593	5.24899	5.41468	4.42514	4.84318	5.56027	6.20044	5.96767	6.03999	5.37277	5.59006	5.98513	5.75418	4.08951	4.2912	6.44679	5.67666	4.75556	5.68852	5.90414	5.36487	5.26484	4.03261	5.59297
Aff2	3.89763	2.8774	3.79825	3.05619	3.23648	0	2.24984	2.31378	2.11758	2.7183	1.24689	1.92182	3.53343	3.29076	2.81498	0.562039	2.37784	0.657472	3.13643	2.85522	2.86212	3.63111	2.53935	2.70065	3.62661	2.9759	1.67162	0	1.04755	0	2.62079	3.5824	2.38069	0	0	0
Aff3	1.69714	0.612609	1.44445	1.24615	0	0	3.0896	5.19954	1.07944	0	2.69893	1.92182	1.86581	1.17325	2.54342	1.9479	0	2.1583	1.48465	1.3556	0	1.09694	1.95901	0	1.32971	5.54792	0	2.24769	2.88794	3.33259	1.26591	0.584029	1.92799	3.75304	0	2.17033
Aff4	5.25652	4.88592	4.54724	4.75859	5.03683	4.02161	3.75713	3.69104	4.73357	2.9957	4.43292	4.2923	3.83022	3.9481	4.54457	4.21918	4.45864	4.36658	4.67691	4.24252	4.08963	4.93612	4.11812	4.7372	4.56699	4.83137	2.91784	4.3035	4.61321	4.72289	3.61333	4.80465	4.19369	5.57924	5.55758	5.17043
Afg3l1	5.30643	5.67968	5.21542	5.57442	5.71385	3.63588	5.31524	5.92072	5.54356	5.82806	5.84059	5.42073	6.17807	5.50967	5.75826	5.81396	5.90125	5.50631	4.83678	4.86109	5.3226	6.00483	5.25029	6.11803	4.89516	5.47554	5.61723	6.17463	5.67666	5.28952	5.09789	5.1871	5.29786	5.26484	5.55758	5.53967
Afg3l2	4.02233	4.07644	3.60766	3.92392	3.61274	3.63588	4.30608	5.34761	4.23354	4.45474	5.02617	4.70604	3.15934	3.6202	3.49353	4.25561	4.5648	4.05203	3.55961	4.18185	3.68313	4.34788	4.15756	3.7903	4.01215	3.34435	2.09713	3.0872	4.17571	4.65523	3.30699	4.45676	4.03815	5.14271	4.3368	3.52404
Afmid	1.22993	1.63974	2.62404	2.69784	1.92915	4.02161	2.58698	0	2.44702	1.92238	0	1.92182	1.86581	1.17325	2.2086	2.84651	2.7817	0.657472	1.48465	3.37214	2.86212	2.31803	2.27817	2.5582	3.62661	4.27152	1.67162	0	2.07076	3.57156	2.09688	2.99755	3.16159	2.04288	4.3368	0
Afp	2.56893	1.04127	2.15159	1.90464	2.50602	0	1.17127	0	0	1.92238	4.00955	2.23839	0	1.81162	3.41405	3.10797	2.59385	1.9585	3.13643	2.85522	1.92107	1.4375	2.41466	1.50266	2.65474	2.9759	1.67162	3.61443	2.39728	4.87933	3.7701	1.5831	3.4354	3.75304	0	2.17033
Aftph	5.93313	5.50582	5.21542	5.50347	5.52146	4.02161	5.22152	5.34761	5.7062	5.82806	5.3514	4.98546	5.14492	5.09855	5.53226	5.10202	5.48074	5.33119	5.40481	5.7341	5.96151	5.41189	5.6466	4.89371	5.30724	5.54792	4.98185	5.93044	5.33913	5.14901	4.90844	5.473	5.05573	5.48186	5.15271	6.18539
Aga	5.23949	5.48893	5.48866	5.35015	5.2994	4.97649	6.12651	5.34761	5.19468	4.54373	6.03441	5.6517	6.01063	5.69585	5.43495	5.12189	5.65911	5.46919	5.52238	5.91273	5.6373	5.39246	5.95718	5.56841	5.53623	5.23368	6.46644	3.0872	4.8977	5.497	5.67537	4.83019	5.6465	5.37743	5.87336	5.48433
Agap1	6.5659	6.41133	6.51386	6.23059	6.33215	5.9534	4.77051	5.60473	6.08307	4.62755	4.52185	5.51173	6.32808	5.79703	6.24527	5.16083	5.90125	5.13182	6.21216	6.66616	6.37882	6.2295	5.82868	6.37335	6.65668	6.25819	5.3728	5.26649	5.22028	4.99332	6.17344	6.4235	6.07447	4.86225	6.60045	4.34035
Agap2	3.10849	1.86596	4.04389	4.00835	3.08557	0	2.58698	4.07788	2.94098	2.7183	3.40777	3.22759	2.65294	3.29076	4.1622	0.562039	3.57455	2.1583	3.32084	2.29207	1.92107	3.9825	3.59342	3.34599	3.43802	2.47983	1.06547	2.24769	3.78704	3.41672	3.71971	1.80535	3.71765	2.04288	0	3.00046
Agap3	2.86379	2.65311	0	3.05619	2.24623	3.10781	2.86007	2.31378	3.60077	2.7183	2.35611	3.9016	2.65294	3.19514	2.3857	3.32923	3.35539	2.6313	3.13643	3.00282	3.1151	3.338	1.95901	2.22258	2.25816	0	3.1127	2.24769	3.08222	3.33259	3.00431	2.69807	3.16159	2.85626	2.27544	3.00046
Agbl5	1.88405	1.63974	1.44445	2.47861	3.08557	0	1.80908	3.16087	1.07944	1.26017	2.35611	1.51568	2.65294	1.52746	2.54342	1.75778	0.879325	1.10744	1.9991	1.3556	2.86212	2.47405	3.03912	2.94923	1.32971	1.71772	0	2.24769	3.25341	3.64316	3.00431	3.38978	2.82334	3.75304	3.64666	3.52404
Ager	1.22993	1.63974	0.895917	2.47861	0	2.26614	0	0	2.44702	1.26017	0	0.948355	1.86581	2.04892	2.2086	1.2804	1.81498	0.657472	2.37754	0.831486	2.37311	0.650307	1.28923	1.78444	2.47004	1.71772	1.06547	4.95391	0	1.14397	3.37368	2.16775	1.73885	0	3.11818	3.28587
Agfg1	5.75288	5.69449	5.80969	5.7317	5.99365	6.27066	5.70973	5.71793	5.73664	5.5559	5.19793	5.59733	6.27979	5.2726	5.65833	5.35804	5.92138	5.59514	5.29895	5.60142	5.67714	5.62666	5.51612	5.6758	5.8329	5.31889	5.21196	5.74117	5.73563	5.26703	5.35058	5.89206	5.72511	6.05602	5.77559	5.30429
Agfg2	4.06161	4.88592	4.37839	5.45916	4.66327	4.79038	4.70277	3.16087	4.46931	3.6043	4.33815	4.35918	4.77859	4.39801	4.46792	4.57682	4.88477	4.10139	4.57173	4.46251	4.666	4.76538	4.67512	4.83312	5.00123	5.0465	3.1127	2.24769	4.41098	3.64316	4.1958	4.66973	3.37167	4.0534	4.80168	3.00046
Aggf1	5.61445	5.75227	5.21542	6.03315	5.2994	5.76408	4.89716	5.03452	5.32058	4.78186	4.83116	5.10719	5.03284	5.4279	4.99047	5.51656	4.66368	4.62468	5.55953	5.60142	5.41973	5.73861	5.05524	5.21185	5.4884	4.27152	3.70281	5.83891	5.22028	4.90869	5.24765	5.44021	5.11532	5.75626	5.67069	4.94302
Agk	2.56893	2.76961	1.44445	3.13342	0	3.10781	2.58698	0	1.68994	3.4285	3.88097	2.90837	2.65294	2.25264	2.54342	1.75778	1.42171	3.50991	2.20069	2.04197	2.99415	2.96975	2.27817	2.5582	3.22101	2.47983	0	4.3035	2.39728	3.64316	2.62079	2.80495	2.24498	4.0534	2.27544	2.64429
Agl	5.22226	4.83335	5.78738	5.19669	5.26469	5.28923	4.47804	6.09849	5.61083	5.32433	5.25092	5.06775	5.24892	5.58705	5.01761	5.12189	4.61509	5.2892	5.63109	5.55433	5.29726	5.50529	4.70205	5.06153	5.33456	4.94294	4.36957	5.63633	5.44893	4.99332	5.62149	5.84274	5.73781	5.98672	5.55758	5.64437
Ago1	3.85355	4.43509	4.18712	4.33693	4.08013	0	4.47804	3.69104	4.79271	4.3599	3.20786	5.06775	4.07625	3.54462	4.38698	4.48774	3.46913	4.32563	4.29164	4.11851	3.96643	4.08288	3.64983	4.83312	3.87004	4.83137	1.67162	4.5543	3.40643	3.64316	4.33619	3.69785	3.9965	5.14271	4.58789	3.52404
Ago2	5.53295	5.07892	4.83518	5.1038	5.73936	4.32566	5.44531	3.69104	4.54005	4.3599	5.14292	4.65372	5.60304	4.83865	5.19452	4.39279	4.66368	5.00787	5.48425	5.04265	4.70506	4.60582	5.05524	4.40395	5.58254	4.43313	4.0268	5.11865	5.44893	5.14901	4.93076	5.2452	4.99356	3.75304	3.64666	5.64437
Ago4	2.67406	2.06148	1.84092	2.59238	0.953156	3.10781	0	0	2.94098	1.92238	2.97572	0.948355	0	3.54462	1.14236	2.64152	2.59385	3.18308	2.37754	3.00282	2.99415	1.71282	2.41466	1.78444	1.32971	4.08951	1.67162	3.61443	2.66337	2.54586	0.554109	2.31969	2.24498	2.04288	2.27544	2.64429
Agpat1	5.86815	5.9129	5.11149	5.56051	5.78905	5.6592	6.10042	6.01234	6.15244	5.10793	5.76973	5.8965	4.91131	5.67828	6.32348	5.87378	5.61036	5.59514	5.69926	4.69736	5.59633	6.59509	5.81641	6.42557	5.36136	5.0465	5.61723	2.24769	5.58343	5.69531	5.60771	5.69769	6.03387	5.83724	6.28224	4.57036
Agpat2	7.78642	8.00885	8.03243	7.6435	7.57056	6.53058	6.62445	7.77776	7.52017	5.86307	6.42868	6.90687	7.36609	6.93222	7.61914	5.89704	6.47815	5.61227	7.73622	7.81699	8.08768	8.01672	7.95374	7.95734	7.43914	7.13585	7.94134	5.40059	5.51775	5.60853	7.88877	7.9802	8.0859	5.00929	6.05104	5.91938
Agpat3	1.69714	2.65311	1.84092	3.27647	2.7261	0	3.8849	4.63408	2.71503	3.4285	0	3.48882	2.65294	3.09273	0	2.4025	2.59385	1.72651	2.20069	3.98284	1.25914	2.96975	1.54859	1.50266	2.65474	1.71772	0	2.24769	1.64803	3.95593	1.52258	1.5831	0.553399	0	3.64666	3.7284
Agpat4	4.09985	3.39539	3.88486	4.0881	3.99798	4.32566	4.30608	3.16087	4.14554	5.89724	4.1276	4.85251	4.91131	4.30945	4.00834	4.68764	4.51269	4.36658	3.8267	3.25923	3.1151	3.69594	3.34273	3.65685	4.52018	2.47983	4.70795	5.11865	4.41098	4.62017	3.86588	4.38965	3.76803	4.51379	4.3368	5.17043
Agpat5	5.41657	5.9129	5.67033	6.27387	6.54958	6.53058	6.40753	5.48189	5.54356	6.2007	6.23185	6.12507	5.67948	6.15564	5.93949	6.23479	6.25845	6.43367	5.54108	5.5302	5.65736	6.2295	6.11579	6.19226	5.6274	6.42121	6.41193	5.40059	6.5683	6.48094	6.27289	5.97452	5.72511	6.56408	6.54218	5.91938
Agpat9	4.46469	4.24692	4.37839	2.07091	2.7261	2.26614	1.80908	2.31378	3.72742	4.14917	1.90558	3.6036	3.15934	2.04892	2.93373	3.32923	2.94788	2.98692	4.1032	4.46251	3.96643	2.86087	4.11812	3.34599	3.62661	3.34435	3.70281	3.99972	3.67098	3.71137	3.71971	4.08483	4.66175	4.51379	4.58789	2.64429
Agps	6.7515	6.82886	6.56722	7.07688	6.03543	5.5461	5.22152	5.82288	5.79565	5.86307	6.60186	5.8738	6.22983	5.87623	6.06187	6.13075	6.28975	6.17012	6.72673	6.28858	6.89182	7.19763	6.95115	6.89439	6.49662	5.39934	6.69667	6.09774	6.06943	5.86962	6.48384	6.60456	6.33059	6.05602	6.05104	5.91938
Agrn	3.31764	3.15952	2.62404	3.20671	1.52216	3.10781	2.58698	0	1.68994	2.37454	1.90558	2.90837	3.83022	2.43113	0.681414	2.52696	1.81498	2.98692	3.03456	2.50515	2.16472	2.14307	2.95207	2.70065	2.96548	2.9759	1.67162	3.0872	2.39728	3.148	1.74041	3.521	2.61893	0	4.3368	3.00046
Agtpbp1	4.97724	5.24912	4.99948	4.9415	4.71561	5.14132	3.46163	4.84815	4.39492	3.4285	4.89914	5.28971	4.28637	5.01701	4.68662	4.14343	4.21954	4.00092	4.95303	4.65335	4.95237	4.46412	4.92414	5.1134	5.22206	4.08951	3.57635	4.7679	4.73382	4.84937	4.90844	4.99729	4.90629	5.00929	4.03261	3.90738
Agtrap	7.27046	6.84222	6.61867	6.58692	6.47563	5.9534	6.20206	6.81008	6.85376	6.17307	5.73295	6.04608	6.96927	6.68187	7.11526	5.93122	6.53149	5.95874	6.946	6.91009	7.25639	7.21433	7.32913	7.14547	7.03522	6.16921	7.22524	5.74117	5.261	5.47755	6.99886	7.11616	7.2347	4.69852	5.15271	5.36683
Ahctf1	3.76112	4.43509	3.12881	4.27011	3.99798	2.26614	3.46163	2.31378	3.46192	2.9957	4.1276	4.07077	3.53343	3.29076	4.06147	3.79302	4.21954	4.51967	3.8864	2.29207	2.71679	3.25437	4.15756	3.43021	4.1415	3.34435	0	5.83891	4.25847	3.64316	3.08614	3.75229	3.49644	4.51379	5.15271	4.20995
Ahcy	3.94041	4.12099	3.60766	4.04878	3.91088	3.63588	4.39462	2.31378	4.39492	4.25838	4.89914	5.54083	4.28637	4.30945	4.46792	5.10202	5.2456	5.37198	3.13643	2.04197	3.51745	4.26484	4.11812	4.02506	4.2602	4.08951	4.36957	5.83891	4.8977	5.33347	4.71623	4.16728	4.07864	5.91391	4.3368	4.06658
Ahcyl1	4.60424	5.03304	4.18712	4.91986	5.0774	5.6592	4.5569	5.34761	3.95157	4.78186	4.75983	5.21945	3.53343	4.2151	4.72005	4.54774	4.66368	5.41166	4.5349	4.65335	4.02934	5.27005	4.40706	4.70375	4.07827	4.94294	4.2912	5.40059	4.25847	4.34754	3.86588	4.58228	4.39946	5.14271	4.3368	4.76869
Ahcyl2	4.70692	4.07644	4.49312	4.85294	4.08013	4.02161	4.95654	5.34761	5.19468	5.22018	4.75983	4.75653	4.63242	5.07188	4.06147	4.76551	4.45864	4.98175	3.63116	3.47686	2.86212	4.46412	3.64983	4.80185	4.36987	3.63759	4.2912	4.7679	5.33913	4.34754	3.61333	4.08483	2.61893	4.30188	4.98785	5.09854
Ahdc1	2.33247	2.06148	2.97936	2.9746	2.24623	2.26614	2.58698	4.84815	2.94098	2.7183	1.24689	2.23839	1.86581	2.04892	3.41405	2.64152	2.59385	2.33377	2.80632	3.13671	2.71679	3.41705	3.03912	1.78444	2.47004	4.43313	2.69249	0	3.25341	3.33259	2.72664	2.31969	2.82334	4.69852	0	3.52404
Ahi1	4.09985	4.20615	3.7061	3.92392	4.08013	4.79038	0	2.31378	3.13628	2.7183	2.35611	3.70992	4.46974	3.9481	2.54342	4.29115	2.59385	3.08833	3.69933	3.13671	2.55516	4.38768	3.70412	4.07823	2.47004	4.43313	0	0	3.78704	4.06424	3.71971	3.90428	3.55501	3.75304	4.98785	2.17033
Ahnak	8.18582	7.88518	7.55959	7.90258	8.13869	8.36059	7.80654	7.45748	8.03676	8.49574	8.40442	8.08004	8.45164	8.16267	7.94667	9.09639	8.322	8.44759	7.30987	6.82337	6.99786	7.23629	6.58951	7.13296	8.02553	7.61161	6.17064	8.78024	8.78337	7.73288	5.78969	6.11618	6.06443	8.73271	8.32121	7.98351
Ahr	2.45554	2.52637	2.62404	4.4317	4.15784	3.63588	3.0896	3.16087	2.11758	0	1.90558	2.23839	3.83022	3.69201	3.83609	2.84651	3.09687	2.1583	1.48465	2.29207	2.37311	2.31803	2.53935	2.94923	2.81846	0	2.91784	0	2.66337	2.81751	1.92963	1.80535	0	3.37323	4.3368	2.64429
Ahsa1	5.47593	5.55535	5.59525	5.88471	5.5791	5.9534	5.99107	5.71793	5.6751	5.32433	5.61663	6.02563	4.63242	5.84507	5.96759	6.05008	6.0549	6.06208	5.55953	5.00812	5.21846	5.44998	5.21333	5.6231	5.64932	5.61684	6.08032	6.17463	5.9747	6.46127	6.01533	5.62661	5.53454	5.83724	6.60045	6.18539
Ahsa2	4.68192	5.05616	4.04389	5.17858	5.11685	5.42337	3.61693	5.03452	4.84952	4.14917	4.60561	5.28971	4.77859	4.59818	3.89582	4.81517	5.45336	5.15538	4.45828	4.78155	4.58455	5.13628	3.94858	5.5497	3.94284	4.83137	4.20834	5.26649	5.58343	4.50957	4.55315	4.92803	3.66545	5.14271	5.55758	4.94302
AI314180	5.4904	5.26905	5.37355	5.39788	5.15526	5.14132	5.52593	4.38262	5.54356	5.37372	5.30204	5.7296	4.77859	5.48965	4.61734	5.6996	5.36796	5.66247	4.83678	5.6244	5.01588	5.52327	5.48545	5.47236	5.22206	4.94294	3.92668	6.01651	5.48375	5.89917	4.93076	5.28267	5.3149	5.91391	6.05104	6.25318
AI413582	7.09225	6.98763	7.45022	6.84401	7.04499	5.5461	7.38827	7.3562	7.01145	6.93529	6.51787	6.25368	6.80837	6.93961	6.85431	6.7381	6.22646	6.45282	7.10523	7.61955	7.58431	6.86553	7.57473	6.94536	6.64582	6.38215	8.11631	5.74117	6.3212	6.31547	7.17281	6.82377	7.18457	6.82457	5.43483	6.25318
AI450353	2.86379	2.06148	1.84092	2.07091	0.953156	2.26614	1.17127	0	1.68994	2.37454	2.97572	1.92182	0	1.81162	1.77182	1.53874	3.23192	1.72651	2.80632	3.00282	3.22668	2.14307	3.03912	2.70065	1.70942	3.63759	3.43772	2.24769	2.07076	2.68807	2.62079	1.9979	2.09517	0	2.27544	2.17033
AI463170	3.03144	2.65311	2.62404	1.24615	2.24623	2.26614	0	0	0	1.26017	1.24689	1.92182	3.53343	2.43113	1.49115	2.74766	1.81498	2.1583	3.23158	3.66593	3.33026	2.31803	3.12122	1.78444	3.22101	3.63759	3.43772	0	1.64803	2.68807	1.52258	3.24542	3.8638	0	0	1.45976
AI467606	7.14806	7.25077	7.38485	6.20399	6.26349	6.34016	5.80973	6.09849	6.43826	6.4281	5.02617	5.51173	6.12439	6.42164	6.64398	6.37387	5.9608	6.0868	7.63107	7.90876	7.8382	6.89345	7.39662	6.70453	6.94062	7.01339	8.16106	6.77778	7.0117	6.70661	6.98826	7.48907	7.49987	6.05602	6.65646	6.15026
AI504432	2.67406	2.8774	1.44445	2.21998	3.3731	0	1.80908	2.31378	3.46192	2.7183	2.35611	1.92182	3.15934	3.19514	2.68558	3.32923	2.37784	2.6313	1.9991	1.73922	0	1.94392	0	2.02008	1.70942	1.71772	0	0	3.08222	2.81751	2.82526	1.9979	2.24498	0	3.64666	3.52404
AI506816	2.77204	1.86596	2.62404	2.59238	3.23648	0	0	0	1.07944	2.7183	1.24689	2.23839	1.86581	1.81162	1.77182	1.2804	2.12369	1.9585	1.48465	2.69078	3.22668	2.86087	1.54859	2.83028	3.0989	1.71772	0	0	3.08222	2.00889	1.74041	1.5831	2.50472	3.37323	4.80168	3.7284
AI597479	2.86379	3.07147	2.81261	1.71668	1.52216	2.26614	2.58698	0	0	1.92238	1.24689	2.49783	4.46974	2.43113	2.3857	2.64152	2.12369	1.72651	1.9991	3.75192	1.62774	2.47405	1.28923	3.25656	1.70942	2.47983	2.09713	0	1.04755	1.7739	2.09688	2.31969	3.23507	3.75304	0	2.64429
AI662270	7.38328	7.59667	7.51276	7.5794	7.51258	7.39794	7.81459	7.58232	7.19802	8.0558	7.62484	7.72816	7.19436	7.35356	7.32535	7.76014	7.69711	7.97142	7.59126	7.61955	7.55788	7.70251	7.82491	7.66755	7.4265	7.52461	8.23618	7.46934	7.62448	7.77334	8.21858	7.62292	7.70127	7.91463	7.04012	7.91191
AI837181	5.01775	4.46994	4.99948	3.87978	4.76611	5.5461	5.17228	4.84815	5.05673	4.45474	4.83116	4.80532	5.03284	4.56031	4.68662	4.90966	5.1465	4.95515	4.4971	4.89928	5.1062	5.20471	4.82963	4.98006	4.52018	5.54792	4.82382	4.95391	4.99746	4.84937	4.40158	4.31927	4.60745	5.98672	4.98785	4.45993
AI839979	6.41483	6.41133	6.40083	6.33236	6.5922	6.69877	7.17982	6.25673	6.94783	6.56195	6.89607	6.63728	6.93849	7.13263	6.99751	6.10103	6.03656	5.84742	6.10315	6.27413	6.36669	6.34518	6.72696	6.39446	6.44743	7.27029	7.68204	4.7679	5.70645	5.43783	6.55022	6.35479	6.42781	4.0534	5.96493	4.85848
AI846148	2.45554	2.52637	0.895917	3.13342	1.52216	2.26614	0	2.31378	2.71503	0	2.35611	3.22759	4.28637	3.19514	2.81498	2.74766	3.35539	2.6313	2.53505	2.50515	0.762784	2.31803	3.34273	1.78444	2.65474	1.71772	1.67162	3.61443	2.66337	2.93629	3.23706	2.90446	2.24498	0	3.11818	1.45976
AI987944	4.46469	4.12099	3.88486	3.87978	4.60896	5.14132	2.86007	4.07788	3.72742	3.4285	3.88097	3.80894	4.63242	4.59818	4.00834	4.29115	4.51269	4.19531	4.71033	4.3567	4.62585	4.08288	3.70412	3.58519	4.2602	3.88117	4.20834	4.5543	4.33674	3.49621	4.12012	4.28274	3.81671	4.0534	4.03261	4.57036
Aida	4.02233	5.16653	4.18712	4.96281	4.4938	4.79038	4.95654	5.03452	4.73357	4.03101	4.33815	4.8982	5.03284	4.30945	4.9628	4.90966	4.21954	5.03353	4.05198	4.56108	4.14749	3.75799	4.07757	4.80185	4.01215	4.94294	4.58195	3.61443	4.99746	4.54739	4.08073	3.85537	4.71409	5.26484	4.3368	4.76869
Aif1	7.01431	6.46416	6.78556	7.00164	7.39714	7.55234	7.71493	7.00112	7.39217	7.38399	6.94513	7.30483	7.6004	7.68366	7.08991	7.4462	7.56263	7.51455	6.85927	6.64384	6.76816	6.52545	6.20321	5.92835	6.82982	6.90733	7.44927	6.9626	6.5188	7.06703	6.86617	6.13679	6.2173	7.32332	6.76236	7.14007
Aifm1	3.94041	4.80633	4.87805	4.91986	4.30174	4.32566	4.77051	5.03452	5.36022	5.2732	4.60561	4.94249	4.77859	4.70618	5.17053	5.68632	5.70627	5.66247	4.37736	4.56108	4.54203	5.27005	4.92414	5.06153	4.85799	3.34435	3.70281	5.26649	5.17838	5.62631	4.79134	4.45676	4.66175	5.26484	3.64666	4.85848
Aifm2	4.93556	4.12099	4.04389	4.8756	5.33329	4.79038	4.63168	4.84815	4.90418	4.62755	4.89914	5.21945	6.17807	4.98878	5.43495	4.97667	4.45864	4.55553	4.20049	3.37214	4.30834	4.85328	4.67512	5.41151	5.33456	3.63759	4.36957	3.0872	4.41098	2.93629	4.93076	5.28267	4.76459	4.51379	3.11818	4.94302
Aim1	3.85355	4.75072	4.4369	3.92392	4.95212	4.79038	4.63168	5.03452	4.6719	5.32433	5.19793	4.35918	3.53343	4.98878	4.9628	4.90966	5.36796	5.15538	4.33514	5.14155	4.20313	3.56322	3.94858	3.72512	4.36987	3.34435	3.1127	3.99972	5.17838	5.19738	3.71971	4.2068	3.76803	2.85626	4.03261	4.34035
Aim1l	3.89763	3.46616	3.79825	1.90464	2.7261	2.26614	3.0896	0	2.71503	2.7183	0	2.23839	2.65294	2.04892	3.56886	2.11586	1.42171	2.87784	4.5349	4.78155	4.30834	1.09694	3.59342	3.25656	2.47004	2.9759	4.98185	2.24769	4.17571	3.77651	4.04025	3.24542	4.55102	2.85626	2.27544	1.45976
Aim2	4.06161	4.20615	3.60766	4.20004	4.30174	4.02161	4.00227	0	3.95157	4.3599	3.40777	4.42309	3.53343	3.9481	3.32994	4.6333	4.5648	4.28349	3.69933	3.75192	4.08963	3.92956	3.03912	4.27325	3.87004	2.9759	4.0268	4.3035	3.78704	4.16498	3.30699	3.16744	3.30498	4.69852	3.11818	4.06658
Aimp1	6.9737	7.05805	7.21136	7.13906	7.31471	6.34016	7.15469	6.25673	6.62882	7.35969	7.28709	7.28776	7.16807	7.3918	7.17675	7.31855	7.34151	7.18318	6.95996	6.88176	6.98998	7.11707	6.99536	6.71296	6.82982	7.27029	7.26679	7.12641	7.11526	7.17365	7.20522	6.82377	7.10841	7.4316	7.53442	7.19281
Aimp2	4.17342	3.93391	4.04389	4.60439	4.90781	3.63588	4.1108	0	3.95157	4.54373	4.75983	4.98546	2.65294	4.48144	4.06147	4.66073	4.88477	5.37198	4.743	4.11851	5.24521	4.38768	4.30537	4.63444	4.65629	5.31889	4.98185	5.52327	4.73382	5.35496	4.86273	4.28274	4.78919	5.48186	4.80168	5.53967
Aip	6.79294	6.6805	6.69257	6.55219	6.66054	6.34016	6.44947	6.32979	7.04832	6.33143	5.90813	6.55408	6.93849	6.68187	6.59076	6.06041	6.57025	6.18164	6.75903	6.75213	6.90026	6.61199	6.84642	6.67894	6.88629	6.3007	7.48491	6.72762	6.04632	6.11601	6.54299	7.01959	7.16591	6.46563	6.20921	5.96052
Airn	10.3659	10.1588	10.2268	9.64139	9.79815	9.9314	10.2189	10.3703	10.3245	10.3208	10.5126	10.2721	9.99325	9.83529	10.0774	10.0367	9.8247	9.80617	10.2223	10.0461	10.2002	10.1272	10.2727	10.375	10.0505	10.2267	10.0909	9.5809	10.0535	9.97328	10.1868	10.4082	10.3431	9.75205	9.93748	9.59764
AK010878	4.52214	4.63262	4.5994	4.73401	4.90781	4.02161	3.8849	3.16087	3.60077	3.9023	4.43292	4.70604	4.07625	4.70618	4.46792	4.3597	4.40247	4.32563	4.29164	4.56108	4.62585	3.92956	4.50206	4.56163	4.52018	5.23368	5.33424	4.3035	3.54476	4.47074	4.76674	3.90428	4.97224	4.69852	3.64666	4.67293
Ak2	7.81544	7.76049	7.63024	7.79973	7.7939	7.14958	7.53184	7.61192	7.42057	7.23161	7.69345	7.47279	7.80192	7.61604	7.74221	7.14004	7.42845	6.99359	7.37905	7.29373	7.33942	7.72598	7.81261	7.71449	7.72885	7.29152	7.44022	7.40697	7.19096	7.59524	7.71639	7.60824	7.55112	7.85754	7.47335	7.50236
Ak3	4.65649	4.1642	4.18712	4.60439	4.23158	0	4.00227	4.07788	4.6719	3.6043	4.68478	3.70992	4.91131	4.44032	4.81593	4.39279	4.61509	4.40641	4.20049	3.47686	4.62585	3.69594	4.03584	4.89371	5.10004	3.88117	3.70281	3.0872	5.17838	4.84937	4.55315	4.16728	3.76803	4.30188	4.98785	4.67293
Ak6	5.81167	5.86132	5.91635	5.62877	4.9951	6.03949	5.87274	4.63408	5.64332	5.51247	5.25092	5.75465	5.82118	4.98878	5.55096	5.65938	5.68288	6.25981	5.34223	5.2039	5.65736	4.76538	5.80404	5.45236	5.46387	5.47554	6.31625	4.7679	5.22028	5.5162	6.23752	6.0847	5.91594	6.05602	6.13229	5.23891
Ak8	1.22993	0	0.895917	1.71668	2.917	0	1.17127	2.31378	2.94098	1.92238	1.90558	3.22759	2.65294	1.81162	0	1.53874	3.23192	2.6313	0.677619	0	0	1.71282	0.972806	0	2.25816	0	1.67162	0	3.40643	1.14397	0.953469	1.9979	1.52113	0	2.27544	1.45976
Akap1	1.48237	1.86596	1.44445	2.21998	2.7261	3.10781	2.24984	0	1.68994	2.37454	3.40777	2.23839	0	1.52746	1.77182	1.9479	1.81498	2.75983	1.13685	0.831486	0	1.94392	1.28923	1.78444	1.32971	0	0	3.99972	3.67098	3.04603	2.62079	1.5831	2.50472	4.0534	3.64666	2.64429
Akap10	3.66237	3.88309	3.26422	3.87978	3.49789	0	3.0896	3.69104	3.72742	3.22827	4.1276	4.07077	3.83022	2.73299	3.70865	3.79302	3.46913	3.43488	3.48433	3.75192	2.71679	4.34788	4.15756	3.34599	3.0989	3.88117	2.69249	0	3.67098	3.57156	3.00431	3.5824	3.37167	3.75304	3.64666	1.45976
Akap11	4.60424	4.63262	4.31741	3.83425	3.49789	2.26614	2.86007	4.07788	4.05181	1.92238	4.33815	3.70992	3.83022	3.54462	4.21005	3.25918	3.23192	3.27199	3.94373	3.13671	3.68313	4.82457	3.94858	4.66951	3.7124	3.63759	2.91784	0	3.99443	3.57156	3.6675	2.80495	3.23507	4.51379	3.64666	3.90738
Akap13	7.86624	7.51139	7.87735	7.89705	7.57056	7.60976	7.2645	8.08261	7.64577	7.7817	7.48807	7.34663	7.74969	7.74825	7.38388	7.52293	7.21679	7.4916	7.86422	7.69204	7.25639	7.37639	7.27635	7.59643	7.43284	7.37347	5.93327	7.77119	7.77263	7.43804	7.08597	7.43601	7.38753	7.40528	8.48484	7.8143
Akap7	2.0495	3.39539	3.38801	2.07091	2.50602	4.57665	2.86007	4.07788	3.60077	1.92238	1.90558	0	1.86581	3.29076	1.49115	1.9479	3.09687	1.44993	3.94373	3.66593	3.96643	3.16559	2.65411	3.05911	4.07827	3.63759	3.1127	3.0872	3.08222	2.81751	2.91756	2.90446	3.08417	2.85626	2.27544	3.28587
Akap8	5.1512	5.18763	4.83518	5.66824	5.22913	5.5461	4.39462	4.63408	5.23788	5.46768	4.75983	5.06775	3.53343	4.90059	5.01761	5.67291	5.68288	4.51967	5.18469	5.2039	4.30834	5.33255	4.90109	5.18786	4.81985	4.43313	2.69249	6.01651	5.55096	5.04711	5.21164	4.77866	4.52195	5.37743	6.20921	5.78842
Akap8l	4.93556	4.66306	4.87805	4.00835	5.43044	5.28923	4.63168	4.84815	4.60748	4.25838	2.35611	3.22759	3.83022	4.52141	4.58141	4.25561	4.01	3.83575	5.13633	5.34892	4.35821	4.46412	4.67512	4.63444	4.4718	4.27152	3.43772	5.11865	4.61321	4.0111	4.40158	4.80465	4.76459	5.00929	3.64666	4.76869
Akap9	7.37551	6.85546	6.95528	7.45706	6.42937	6.19765	6.81297	5.82288	6.88127	6.5187	6.4515	6.70312	6.46395	7.26803	6.6784	7.10553	6.76099	6.79789	6.87409	7.11868	6.22606	6.33504	6.70716	6.87948	6.50866	6.16921	5.12427	6.9626	7.08156	6.34798	6.56457	6.63385	6.84649	6.74285	6.86101	7.12205
Akip1	4.73148	4.20615	5.03779	4.85294	5.03683	4.97649	5.40324	5.48189	5.00765	5.10793	4.75983	4.65372	4.28637	4.95998	4.50675	5.19875	5.68288	5.24596	4.6427	4.11851	4.85152	5.15945	4.56208	5.16347	4.52018	5.31889	5.07834	4.95391	5.17838	5.79299	5.24765	4.83019	4.60745	5.91391	4.98785	4.45993
Akirin1	5.07646	5.20842	5.28077	4.73401	5.36641	5.14132	4.83522	4.63408	4.60748	4.62755	4.60561	4.80532	5.24892	4.83865	5.21811	4.42514	5.50761	4.72257	5.40481	5.10933	4.91953	5.03967	4.40706	4.52379	5.33456	5.31889	5.44696	5.11865	4.41098	4.11549	5.41533	5.1672	5.3484	4.51379	5.15271	4.45993
Akirin2	5.76483	5.47183	5.1816	5.68115	5.71385	4.79038	5.01357	5.34761	4.79271	4.45474	5.87476	5.6517	4.91131	5.34121	5.12134	5.75155	5.00279	5.00787	4.83678	4.97275	5.61696	5.2486	5.32148	5.23545	5.10004	5.9193	5.55152	4.5543	5.261	4.11549	5.03746	5.3192	5.3149	4.51379	5.30065	5.42677
Akna	6.58625	6.42027	6.52738	6.04319	6.50567	6.75074	6.10042	6.64813	6.6767	6.17307	6.23185	6.18159	6.8749	6.30052	6.58169	5.93122	6.25845	6.19307	6.51608	6.81341	6.6329	6.25123	6.28563	6.34108	6.3965	6.07437	5.74031	6.82625	6.13661	5.91372	6.35772	6.54412	6.67226	5.48186	6.54218	6.34924
Akr1a1	8.06779	8.16326	8.04659	8.20721	8.79673	8.89874	8.79926	8.8132	8.83386	8.91396	9.14669	9.1093	8.21534	8.85262	8.51904	8.91751	8.98649	8.90914	8.12808	7.94116	8.17374	8.48642	8.1127	8.04676	8.53255	8.41821	9.09075	8.55429	8.72272	8.74991	8.32774	8.1005	8.35672	8.66778	8.35545	9.00544
Akr1b10	4.73148	4.91151	4.04389	4.0881	4.08013	2.26614	5.63899	3.16087	4.90418	3.9023	4.68478	4.94249	3.83022	4.44032	4.11272	4.99833	4.5648	4.92804	4.20049	4.46251	4.25669	4.50087	4.64768	4.12951	4.01215	5.0465	4.12042	3.0872	4.94844	4.96566	4.49442	3.75229	3.90941	5.26484	3.11818	4.57036
Akr1b3	4.55003	4.50398	5.11149	4.96281	5.49175	4.57665	5.87274	4.84815	5.27982	6.08686	5.84059	5.62477	4.63242	5.29584	5.04425	5.83819	5.86014	5.78837	4.92483	4.78155	4.95237	5.03967	4.85384	4.52379	4.89516	5.74553	5.85371	5.63633	5.44893	5.28952	5.35058	5.01965	4.63485	5.26484	4.80168	5.23891
Akr1c13	5.35466	5.07892	4.5994	5.70665	5.88358	6.19765	5.96238	5.92072	6.10656	6.1449	6.66179	6.163	6.27979	5.95132	5.28665	5.80169	5.39699	6.1111	5.08629	5.00812	5.07672	5.55856	4.99118	5.06153	5.41353	6.49629	6.43033	6.09774	4.08791	5.59053	5.78969	5.473	5.89342	5.75626	0	5.74198
Akr1c18	1.22993	1.04127	2.15159	1.71668	1.52216	0	0	0	1.68994	2.37454	3.73981	3.70992	0	2.43113	3.32994	2.52696	1.42171	2.87784	2.67705	1.73922	0.762784	1.94392	2.95207	1.15214	3.53539	1.71772	1.67162	3.0872	1.64803	1.14397	2.91756	1.5831	1.73885	0	2.27544	0
Akr1e1	1.22993	1.04127	0	0.543356	0	0	3.0896	0	2.44702	1.26017	2.35611	2.23839	0	2.86313	1.49115	2.84651	1.42171	3.27199	1.9991	1.73922	2.16472	1.94392	2.41466	2.70065	0.81292	0	1.67162	0	2.66337	2.81751	2.38249	0.584029	0	2.85626	0	1.45976
Akr7a5	4.24342	4.28657	4.25373	4.52062	4.36864	4.79038	3.75713	4.07788	4.31649	4.45474	4.23671	3.98866	3.83022	4.39801	3.24061	4.88661	4.96452	4.65806	4.20049	3.13671	3.90065	3.49199	4.30537	4.02506	4.07827	4.43313	5.33424	4.5543	4.67477	4.30402	4.99572	3.85537	4.11802	5.26484	4.03261	4.20995
Akt1	6.88341	7.19457	6.66836	7.14373	7.79997	7.43017	6.81297	8.08261	7.4392	7.43141	7.26149	7.59576	7.24555	7.35356	7.27562	7.26594	7.44939	7.39098	7.1115	7.00945	6.85755	7.20322	7.14514	7.15787	7.58842	6.3007	6.89516	7.61441	7.33139	7.21535	7.18679	7.36354	7.10351	6.9753	8.01333	7.35587
Akt1s1	2.19791	2.23363	3.12881	2.88811	2.50602	2.26614	2.58698	3.69104	2.71503	2.37454	0	2.49783	0	2.86313	2.00668	2.11586	0.879325	2.49019	2.37754	2.29207	2.86212	2.47405	2.65411	1.78444	3.62661	2.9759	1.67162	0	1.04755	2.38808	2.09688	1.9979	1.92799	2.85626	3.11818	2.17033
Akt2	4.87069	5.22892	5.07511	5.16025	5.0774	5.14132	4.30608	3.69104	4.95684	5.16515	5.08573	4.70604	5.34593	4.90059	5.24132	4.93234	4.45864	5.00787	4.98068	5.26367	5.24521	5.55856	5.21333	5.45236	5.58254	4.71044	4.58195	5.26649	4.67477	5.24419	5.05789	5.50506	5.3484	4.86225	5.30065	5.36683
Akt3	4.31017	3.983	4.18712	4.36922	4.66327	2.26614	5.48618	4.07788	5.10419	5.04834	4.23671	4.75653	4.63242	3.88821	5.01761	5.14149	4.75622	4.65806	3.99887	3.9099	3.75934	4.46412	3.80693	4.7372	4.93139	4.43313	3.43772	3.61443	4.73382	4.78751	3.86588	3.69785	3.30498	4.0534	4.58789	4.57036
Aktip	4.37398	4.50398	4.87805	3.40661	3.49789	4.02161	3.0896	3.16087	4.14554	4.78186	4.23671	4.42309	4.46974	3.54462	4.46792	4.14343	3.85122	4.14911	4.71033	4.46251	4.54203	4.22146	3.90289	3.43021	4.52018	2.47983	4.82382	3.61443	3.25341	4.75556	4.83933	4.69775	5.4289	0	2.27544	3.28587
Alad	5.05716	5.22892	4.37839	5.00452	5.43044	6.34016	5.77716	5.48189	5.73664	5.51247	6.00386	5.28971	3.15934	5.95132	5.0961	5.08187	5.42545	5.64593	6.68531	5.94959	6.23943	5.11273	4.40706	5.56841	7.20762	7.85926	6.99742	6.31712	6.30182	7.12446	5.35058	5.44021	5.77524	7.32332	6.71038	6.55126
Alas1	7.28298	7.43406	7.51954	8.10067	6.99293	5.42337	6.34224	6.39932	5.85235	5.89724	6.03441	6.12507	5.52232	5.60576	6.31256	6.30601	6.37977	6.40448	7.13014	7.33611	7.54717	8.26126	8.18845	8.2487	6.45989	6.60207	6.12619	6.09774	6.82065	6.59367	6.79496	7.16714	6.97537	5.91391	5.67069	5.96052
Alas2	5.50472	5.52252	6.30983	3.40661	5.03683	6.34016	6.36433	4.63408	5.32058	5.2732	6.71933	6.80259	4.07625	6.02269	4.81593	4.76551	5.75193	5.22384	8.65772	8.35243	8.08027	2.86087	3.94858	2.70065	6.95829	9.38186	7.83488	8.19692	8.35539	9.32833	5.35058	5.30105	6.93735	8.55259	9.13405	8.20509
Alcam	5.84582	5.57149	5.46073	6.13993	4.9951	5.42337	5.48618	6.32979	5.98505	5.51247	4.83116	5.38907	4.91131	5.96588	5.01761	5.73874	5.5599	5.71098	5.27681	5.29265	5.07672	5.73861	5.57558	5.49209	5.55957	5.0465	4.70795	5.93044	6.13661	4.96566	4.46413	5.42353	5.54902	5.91391	4.80168	5.36683
Aldh16a1	4.65649	4.46994	4.64974	4.75859	5.11685	5.28923	5.06844	3.16087	4.84952	4.70677	5.3514	5.59733	4.63242	4.39801	4.99047	4.86319	5.21331	4.98175	4.60765	3.83307	4.74309	4.96272	4.67512	5.41151	4.85799	4.57843	4.0268	4.5543	5.261	5.09896	3.9557	4.58228	4.60745	2.85626	3.11818	5.17043
Aldh18a1	2.45554	3.07147	3.26422	2.59238	2.50602	0	1.80908	0	1.07944	2.9957	2.69893	2.49783	2.65294	2.43113	3.24061	3.32923	3.57455	3.18308	2.37754	1.73922	3.22668	2.31803	2.1274	1.50266	3.0989	2.9759	1.06547	2.24769	2.88794	3.41672	2.38249	1.80535	1.73885	2.04288	2.27544	2.17033
Aldh1a1	1.69714	2.23363	2.15159	1.24615	3.08557	4.79038	1.17127	0	2.11758	1.92238	2.97572	0	0	1.52746	1.49115	0	1.81498	2.1583	4.57173	2.29207	2.55516	0.650307	0	1.50266	3.0989	3.34435	2.09713	2.24769	3.89446	3.89857	0.554109	1.80535	1.73885	3.37323	0	3.00046
Aldh1b1	2.56893	3.77574	1.84092	3.34301	4.15784	0	4.21174	3.69104	5.10419	4.54373	4.89914	4.8982	3.15934	3.9481	4.58141	4.06348	5.00279	4.69067	3.03456	1.73922	3.22668	4.08288	3.2726	4.44502	3.79337	4.83137	4.36957	4.3035	5.17838	4.58423	3.49848	2.99755	3.37167	3.75304	4.80168	4.06658
Aldh2	9.07353	8.97605	9.0672	8.63824	8.88222	9.2361	8.53282	9.05861	9.17682	7.89597	8.64117	8.66653	9.41646	8.87401	9.28407	7.95829	8.20374	8.12251	8.98407	8.89635	9.02647	8.98342	9.05241	8.94731	9.23512	8.33884	9.12786	8.23332	7.93869	8.19866	8.70002	9.06329	9.15006	7.60349	8.30378	8.05173
Aldh3a2	5.9225	5.93802	6.30983	5.51794	5.90628	6.34016	5.44531	5.92072	5.64332	5.5559	5.3514	4.22217	6.27979	5.69585	6.07485	5.48622	5.61036	5.00787	5.79583	5.96767	6.08511	5.6432	5.96832	5.28152	5.79408	5.23368	6.17064	5.93044	5.99897	5.26703	5.70156	6.22605	6.33059	4.86225	4.58789	5.42677
Aldh3b1	7.79227	7.64704	7.51276	7.17603	7.54909	7.14958	7.22881	7.72457	7.96786	7.12028	7.40867	7.92312	8.32648	7.64347	7.90731	6.92502	7.34151	6.9672	7.7199	7.95482	7.94404	7.42501	7.81569	7.6457	8.01712	7.70952	8.12763	6.67566	6.87413	6.6469	7.55693	8.07936	8.17261	6.61089	7.23665	7.19281
Aldh3b3	3.10849	2.9777	1.44445	2.69784	0	3.10781	1.80908	0	2.44702	1.26017	1.90558	0	3.53343	2.86313	3.56886	0.965476	0	0	2.37754	3.57449	2.55516	2.61483	2.1274	2.83028	3.33359	1.71772	2.09713	0	0	0	2.62079	2.58263	2.50472	0	0	0
Aldh4a1	4.09985	4.50398	4.54724	4.709	3.99798	3.10781	4.1108	2.31378	4.05181	4.03101	5.08573	2.71766	4.46974	3.69201	4.11272	4.54774	3.67279	4.36658	4.05198	4.11851	4.14749	4.76538	4.26981	4.63444	4.1415	4.08951	3.81908	3.0872	4.17571	3.95593	4.30235	4.24527	4.36714	0	3.64666	3.7284
Aldh6a1	1.69714	1.04127	3.12881	2.35508	0.953156	0	0	2.31378	0	1.26017	1.24689	2.23839	2.65294	0.70274	2.00668	1.2804	0.879325	1.72651	0	2.29207	2.55516	2.14307	2.53935	2.22258	2.47004	1.71772	2.69249	0	1.04755	2.54586	1.74041	1.9979	2.09517	0	0	3.28587
Aldh7a1	1.48237	1.86596	1.44445	1.71668	1.92915	2.26614	1.17127	0	1.07944	1.92238	1.90558	2.90837	0	1.17325	2.3857	2.26629	2.94788	3.50991	1.13685	1.3556	2.71679	2.74309	1.95901	2.22258	1.32971	1.71772	2.09713	0	3.67098	3.148	1.74041	1.32025	1.52113	0	2.27544	3.90738
Aldh9a1	6.24607	6.32829	5.91635	6.34864	6.24581	4.97649	6.54929	6.39932	6.5105	6.93529	7.03851	7.04531	5.75207	6.00869	6.29048	7.12535	6.90943	6.94709	6.03883	5.89394	6.30446	6.18502	6.12577	5.98513	6.1877	6.79285	5.90723	6.82625	7.0117	6.59367	6.35772	5.98593	5.88203	6.35997	6.35174	6.84287
Aldoa	9.53779	9.69877	9.59778	9.41847	9.63957	9.97028	9.44795	9.42654	9.57869	9.45698	9.65419	9.78973	9.82677	9.58716	9.88448	9.4459	9.69773	9.59731	9.50461	9.40433	9.67157	9.86968	9.66026	9.67845	10.0719	9.45427	10.2352	9.16649	9.54467	9.51525	9.72886	9.86911	9.65566	9.29521	9.2749	9.5103
Aldoc	3.50028	3.32097	1.84092	1.24615	0	3.63588	1.17127	2.31378	1.07944	3.4285	1.90558	2.49783	2.65294	3.29076	3.14539	2.26629	2.12369	2.6313	2.67705	2.69078	2.37311	2.14307	2.27817	2.94923	2.65474	3.88117	2.09713	2.24769	2.07076	1.7739	3.16357	2.69807	2.09517	0	2.27544	2.17033
Alg1	4.17342	3.53362	3.12881	3.87978	4.36864	3.10781	3.8849	5.48189	4.23354	4.25838	4.00955	5.10719	4.91131	4.52141	3.32994	4.32583	3.67279	4.19531	3.94373	3.47686	3.1151	4.08288	3.94858	3.96985	3.79337	3.88117	4.20834	3.61443	4.5489	4.16498	4.08073	4.12664	4.23009	3.75304	3.64666	4.20995
Alg10b	3.80808	3.93391	1.84092	4.20004	3.91088	2.26614	4.00227	5.34761	3.13628	3.9023	3.40777	4.8982	4.77859	4.30945	4.11272	4.06348	3.76476	4.32563	3.8864	4.05227	3.22668	4.26484	3.47351	3.65685	4.01215	3.88117	3.57635	3.0872	3.08222	3.41672	3.23706	3.5824	3.37167	4.51379	4.03261	3.90738
Alg11	2.67406	2.38741	2.40707	2.47861	2.50602	3.10781	4.83522	2.31378	2.44702	1.26017	3.20786	2.49783	3.15934	2.58994	2.00668	3.39603	3.76476	2.33377	2.92495	2.04197	1.25914	2.61483	2.27817	2.5582	2.00972	2.9759	3.1127	3.0872	2.88794	2.21091	2.38249	2.16775	2.61893	3.75304	2.27544	2.17033
Alg12	0.923746	2.23363	2.97936	2.69784	1.92915	0	1.17127	2.31378	2.94098	1.26017	3.20786	3.36411	2.65294	2.86313	2.00668	2.4025	2.59385	2.75983	3.32084	1.3556	1.62774	2.47405	2.65411	2.40013	2.25816	2.47983	2.42531	2.24769	3.25341	2.81751	2.72664	2.45714	2.50472	2.85626	0	3.28587
Alg13	4.06161	3.88309	4.4369	4.54909	3.23648	0	2.58698	2.31378	3.72742	4.14917	4.23671	3.22759	3.53343	3.76042	3.41405	4.104	3.23192	2.75983	3.8267	3.37214	2.86212	3.41705	4.07757	3.65685	3.33359	4.83137	4.12042	3.0872	3.40643	3.49621	3.91149	3.521	3.16159	0	0	4.34035
Alg14	3.71259	3.32097	4.18712	3.40661	4.36864	4.79038	3.46163	2.31378	2.71503	4.14917	4.89914	3.9016	3.53343	3.09273	3.14539	3.57968	4.15302	3.89293	2.53505	2.50515	2.99415	3.81747	3.34273	3.58519	4.01215	3.88117	4.82382	3.0872	1.64803	4.06424	4.43319	4.12664	2.82334	0	0	3.7284
Alg2	2.86379	3.32097	2.40707	3.58215	3.3731	2.26614	2.58698	5.34761	3.60077	2.9957	3.73981	2.90837	4.07625	3.19514	2.00668	3.63604	3.09687	3.7141	3.4049	3.75192	2.16472	3.07099	4.19596	3.96985	3.53539	1.71772	4.20834	2.24769	3.67098	3.41672	3.16357	3.45689	3.71765	0	3.64666	3.7284
Alg3	3.18163	3.15952	3.50201	3.78723	3.3731	2.26614	4.00227	3.69104	3.72742	4.62755	4.1276	4.80532	0	3.29076	2.68558	5.06143	3.93279	5.03353	3.03456	1.73922	4.14749	4.34788	2.95207	4.22691	4.01215	2.9759	3.28434	2.24769	4.08791	4.72289	3.37368	4.2068	2.24498	4.30188	3.11818	0
Alg5	5.32268	5.43702	5.87463	5.35015	5.99365	4.97649	6.12651	5.60473	5.47299	5.46768	4.75983	5.82732	4.63242	4.98878	5.30879	5.19875	5.72928	5.77322	5.03445	5.32106	5.16342	5.20471	5.77896	4.98006	5.2794	5.97286	6.48416	6.01651	5.79229	5.76116	5.89561	5.73872	5.89342	5.00929	5.67069	4.85848
Alg6	3.38113	3.32097	2.62404	3.40661	2.917	0	3.46163	0	2.94098	3.76098	2.69893	3.48882	0	3.54462	2.00668	3.10797	3.85122	2.75983	2.92495	2.50515	3.22668	2.86087	2.85942	3.58519	2.81846	2.9759	3.1127	0	3.78704	3.24325	3.61333	2.99755	2.82334	3.37323	3.64666	3.7284
Alg8	2.19791	2.52637	3.26422	2.9746	3.08557	0	3.28757	0	3.30827	3.9023	4.68478	3.9016	3.15934	3.09273	3.70865	3.52102	3.35539	3.83575	1.76468	2.50515	2.55516	3.63111	3.1989	2.70065	2.81846	1.71772	1.06547	3.99972	4.08791	3.83883	3.23706	3.31941	2.50472	3.37323	3.64666	2.64429
Alg9	2.33247	2.06148	0.895917	3.63622	0	4.02161	2.24984	0	0	1.92238	4.43292	1.92182	4.46974	3.54462	2.00668	2.64152	4.21954	3.64919	2.37754	1.73922	3.1151	3.41705	1.54859	2.94923	1.32971	0	2.09713	0	3.78704	3.24325	1.52258	3.45689	2.50472	2.85626	2.27544	3.7284
Alkbh1	3.10849	3.07147	2.40707	2.9746	0.953156	0	3.0896	4.38262	3.13628	1.26017	3.58332	3.6036	1.86581	2.98249	2.00668	3.02597	3.23192	1.72651	3.03456	2.85522	4.02934	2.86087	2.65411	2.22258	2.65474	2.47983	2.09713	0	3.08222	3.04603	2.50656	1.80535	2.61893	3.75304	2.27544	3.00046
Alkbh2	1.69714	2.76961	1.44445	2.35508	1.52216	4.02161	0	2.31378	2.44702	2.9957	1.24689	3.22759	2.65294	2.25264	1.14236	2.11586	2.94788	1.72651	0.677619	2.29207	2.16472	1.94392	2.53935	1.78444	1.32971	4.08951	4.0268	0	0	2.00889	2.82526	1.32025	1.92799	2.85626	0	3.00046
Alkbh3	4.75563	4.85988	5.28077	5.12286	4.71561	5.14132	5.48618	5.19954	5.05673	5.10793	5.08573	5.51173	5.34593	5.34121	5.43495	4.39279	5.53399	5.10787	5.44508	5.29265	5.1062	5.29118	4.85384	5.1134	5.69218	5.86367	4.76705	5.26649	4.48159	5.24419	4.93076	4.75219	4.81338	5.14271	4.03261	5.59297
Alkbh4	4.1371	4.56973	3.96657	4.54909	3.61274	5.28923	4.39462	3.69104	4.39492	4.25838	4.23671	4.22217	4.63242	3.9481	4.61734	3.45988	3.76476	3.18308	4.4971	5.23409	4.54203	4.70366	4.94684	4.89371	5.06785	4.71044	5.16878	4.3035	4.08791	2.93629	4.66389	4.04176	4.52195	4.69852	2.27544	3.7284
Alkbh5	5.53295	5.50582	5.54294	6.13054	5.81327	6.19765	5.60228	5.03452	5.9069	6.05694	5.69521	5.75465	5.34593	5.46936	6.22212	5.82613	5.39699	5.69499	5.48425	5.04265	4.74309	5.88482	5.1754	5.86923	5.4884	5.68262	5.29462	3.0872	5.95001	6.22503	4.99572	5.26406	5.11532	5.67046	5.87336	4.85848
Alkbh6	4.52214	4.24692	4.49312	4.8756	3.23648	4.79038	4.47804	4.38262	4.39492	4.03101	2.97572	5.14559	3.83022	4.11415	4.87649	4.29115	4.61509	4.36658	4.37736	4.69736	4.666	4.93612	4.75444	4.59849	5.2794	3.88117	5.07834	3.61443	4.33674	4.78751	4.79134	5.04168	5.11532	5.14271	4.98785	4.45993
Alkbh7	4.02233	3.88309	3.7061	3.58215	3.49789	4.02161	3.75713	5.34761	4.54005	4.25838	4.23671	4.75653	2.65294	4.16551	3.83609	4.3597	3.76476	3.58123	3.69933	4.11851	4.49823	3.41705	4.07757	4.52379	3.79337	5.86367	5.74031	3.99972	3.40643	4.06424	4.33619	4.64117	4.73956	4.69852	4.80168	3.52404
Alkbh8	3.31764	3.71891	3.38801	3.13342	3.71911	2.26614	2.58698	0	3.95157	4.03101	4.00955	2.90837	1.86581	2.58994	1.14236	3.57968	3.93279	3.43488	3.4049	3.25923	3.1151	3.92956	3.4096	3.25656	2.96548	4.83137	3.28434	3.0872	3.08222	3.49621	3.08614	3.16744	3.23507	3.75304	0	4.20995
Alox15	5.97488	6.20955	6.22936	8.38549	7.3062	6.84938	1.80908	5.48189	5.43637	5.16515	3.58332	2.49783	5.75207	4.98878	5.79009	4.32583	4.84318	4.14911	5.34223	5.6244	4.74309	5.43106	6.11579	5.95702	5.88925	5.74553	5.12427	0	3.40643	4.72289	6.04633	5.64111	5.73781	3.75304	3.11818	4.34035
Alox5	7.24509	6.95724	7.34721	6.52379	6.96076	6.8009	5.96238	6.39932	7.30345	6.4281	6.03441	6.83819	7.02892	6.91731	7.25866	6.15024	6.28975	6.25981	7.32073	7.5189	7.16828	7.01912	6.8343	6.70453	7.01003	6.76276	7.17157	6.9626	6.45004	6.62053	7.04563	7.50501	7.45828	6.24595	7.23665	6.37989
Alox5ap	11.5272	11.4386	11.6858	10.6305	10.9949	11.7231	10.9877	11.0239	11.175	11.0281	10.9178	11.0241	11.3909	11.2644	11.4666	10.8367	10.9963	10.7136	11.3735	11.4352	11.4633	10.9559	11.24	10.937	11.4459	11.0842	12.3126	10.9158	10.5519	10.8765	11.5783	11.7759	11.8198	10.6596	10.3222	10.6448
Alox8	2.33247	1.37132	2.40707	1.24615	1.92915	3.10781	3.46163	0	1.68994	2.7183	2.97572	2.71766	1.86581	2.73299	2.54342	1.75778	2.12369	0.657472	2.37754	1.3556	2.55516	1.4375	2.1274	2.02008	2.00972	2.9759	2.09713	2.24769	2.07076	2.38808	3.00431	1.5831	1.73885	3.75304	0	2.64429
Alpk1	3.18163	3.88309	4.04389	3.92392	3.3731	3.63588	2.58698	0	3.60077	2.7183	2.97572	2.23839	1.86581	3.29076	3.70865	2.64152	4.01	2.33377	3.63116	3.37214	3.75934	2.47405	3.47351	3.05911	2.65474	3.63759	1.67162	3.99972	3.78704	3.57156	3.43743	3.80475	2.61893	2.04288	3.11818	3.7284
Als2	2.67406	2.65311	1.44445	2.07091	1.52216	4.02161	1.80908	0	1.68994	2.37454	0	2.71766	3.15934	2.43113	2.81498	3.02597	2.12369	1.9585	2.20069	3.75192	1.25914	2.61483	3.03912	1.50266	3.22101	1.71772	2.09713	3.0872	3.67098	3.49621	2.24674	2.69807	1.26461	3.37323	4.3368	1.45976
Alyref	5.86815	6.24016	5.83166	6.45776	5.71385	6.03949	6.20206	5.71793	5.19468	6.35621	6.30885	6.12507	6.32808	6.20556	6.27931	6.60323	6.35038	6.70514	6.03883	5.37625	5.7349	6.28323	6.2126	6.42557	5.67091	6.12257	5.55152	6.24763	6.2008	6.22503	6.13551	6.19691	5.76287	7.17543	6.86101	5.96052
Alyref2	3.98195	4.50398	4.25373	3.63622	4.15784	5.14132	5.22152	5.71793	4.54005	4.62755	4.43292	3.07679	5.03284	5.04471	4.25636	4.79055	4.75622	4.55553	4.15267	3.98284	3.83172	4.46412	4.56208	4.12951	4.2602	4.43313	4.0268	4.5543	4.25847	4.43083	4.2322	4.12664	3.81671	4.0534	4.58789	3.00046
Amacr	2.67406	3.32097	1.84092	2.35508	2.24623	0	2.58698	0	2.71503	3.22827	2.69893	3.22759	1.86581	1.52746	1.49115	1.53874	0	3.7762	1.9991	3.13671	3.22668	2.47405	2.27817	3.16121	2.81846	0	1.06547	0	1.64803	2.68807	2.50656	1.80535	2.82334	2.85626	3.11818	3.28587
Ambra1	3.50028	2.52637	3.26422	2.88811	4.36864	3.63588	3.28757	3.16087	1.68994	4.03101	1.90558	2.49783	0	3.46486	2.3857	3.10797	4.08328	3.94794	3.4049	4.56108	3.42689	2.74309	3.59342	3.34599	4.07827	1.71772	2.09713	3.0872	3.67098	2.93629	2.24674	3.38978	3.30498	4.30188	3.64666	2.64429
Amd1	5.72868	5.10133	5.28077	5.70665	5.88358	4.97649	5.60228	6.01234	5.32058	6.1449	6.06433	5.75465	5.52232	5.38521	5.67548	5.67291	5.42545	6.1111	5.82663	5.69122	5.41973	5.7075	5.79155	5.47236	5.4884	6.16921	5.98397	5.74117	5.89933	6.07775	5.99429	5.99724	6.03387	5.98672	6.05104	5.694
Amd2	5.66634	5.07892	5.28077	5.62877	5.88358	4.97649	5.56461	6.01234	5.32058	6.02638	6.06433	5.6517	5.52232	5.38521	5.56942	5.65938	5.42545	6.04956	5.79583	5.64701	5.41973	5.69169	5.77896	5.45236	5.43892	6.16921	5.98397	5.74117	5.8733	6.02512	5.98365	5.96303	6.01313	5.98672	6.05104	5.59297
Amdhd2	4.77939	5.03304	5.31236	4.54909	5.33329	4.32566	5.01357	4.63408	4.90418	4.45474	5.02617	5.10719	4.07625	5.20057	4.38698	4.93234	5.33832	4.98175	5.13633	4.78155	4.88593	5.48709	4.96918	5.00773	5.13152	5.54792	5.41036	5.11865	4.5489	4.78751	4.66389	5.2452	4.60745	4.51379	4.80168	4.20995
Amer1	2.56893	2.38741	1.44445	2.47861	2.917	0	3.46163	3.69104	3.30827	1.92238	1.24689	0	0	2.98249	1.49115	2.26629	1.42171	2.1583	2.92495	2.04197	2.37311	2.14307	1.28923	3.7903	2.25816	0	0	0	1.64803	2.68807	2.24674	1.5831	0.952392	0	0	3.00046
Amer2	5.03759	4.43509	4.74544	3.46753	5.11685	5.14132	4.47804	4.84815	5.3988	3.76098	4.23671	3.98866	5.14492	5.04471	5.01761	4.21918	3.46913	3.89293	5.38425	5.89394	5.1062	4.96272	5.50087	4.36169	5.81362	5.14313	5.48266	4.7679	5.37667	4.50957	5.21164	5.98593	5.67318	4.30188	5.67069	4.06658
Amfr	6.74549	6.90088	6.41545	6.50211	6.11552	6.89629	6.66061	6.81008	6.70776	6.05694	6.60186	6.37175	6.70244	6.40036	6.39767	6.42275	6.39424	6.48106	6.73487	6.9741	6.94173	6.91403	6.88806	6.86443	7.06814	6.45924	7.43111	5.83891	6.76513	6.51951	6.23752	6.71147	6.93183	6.41377	6.05104	6.46812
Amica1	6.04516	6.26022	6.16158	5.28395	6.1914	6.94171	5.35991	4.63408	6.40073	6.81531	6.17814	6.30547	5.43682	6.18082	5.83656	6.02918	6.24254	6.17012	7.06058	7.19741	6.65302	5.11273	5.63268	5.6231	6.2026	6.90733	6.92142	7.34178	7.43288	7.57249	5.03746	5.55185	5.22759	7.17543	7.80609	7.6097
Ammecr1	3.18163	3.71891	2.62404	3.63622	2.917	3.10781	1.80908	3.16087	3.30827	2.9957	3.73981	3.6036	1.86581	3.29076	3.64045	3.39603	2.59385	3.7141	3.8267	4.05227	4.30834	2.96975	2.85942	3.7903	3.33359	3.34435	3.1127	3.61443	3.67098	3.49621	3.7701	4.04176	3.4354	3.75304	5.15271	3.52404
Ammecr1l	4.70692	4.77879	3.96657	4.82993	5.52146	4.57665	3.28757	5.03452	4.79271	3.22827	4.33815	4.35918	4.07625	4.95998	4.38698	3.69029	4.75622	4.65806	3.99887	4.3567	4.25669	4.26484	4.26981	5.1134	4.52018	3.34435	3.57635	5.11865	5.13523	4.58423	4.55315	3.95158	4.33408	3.37323	5.30065	3.00046
Amn	0.923746	0	0	1.90464	1.52216	2.26614	1.80908	3.69104	1.68994	1.92238	1.24689	1.51568	0	2.25264	0.681414	2.4025	2.59385	2.6313	1.9991	1.3556	1.62774	0.650307	1.76835	2.02008	0	1.71772	1.06547	2.24769	2.66337	3.04603	2.72664	1.9979	2.61893	2.85626	2.27544	1.45976
Amn1	4.02233	3.65975	3.79825	2.69784	3.23648	4.57665	2.86007	4.63408	4.46931	4.14917	2.69893	2.71766	4.28637	3.69201	3.41405	4.1818	2.7817	2.87784	3.8267	5.2039	4.02934	3.56322	4.82963	3.25656	3.53539	4.94294	5.41036	4.7679	2.39728	3.24325	4.2677	4.42359	4.55102	2.04288	4.3368	2.17033
Amot	4.06161	4.32516	5.03779	3.40661	4.15784	5.5461	6.01919	5.03452	4.79271	4.3599	5.84059	5.255	3.83022	4.93059	3.64045	3.18555	3.57455	3.94794	7.44008	6.83327	6.6329	2.86087	3.03912	3.58519	5.75418	7.64499	7.02189	6.24763	6.24206	7.62207	4.55315	4.64117	5.61931	6.61089	6.13229	6.31793
Amotl2	2.45554	3.46616	3.50201	2.79611	2.7261	2.26614	0	3.69104	1.68994	0	1.24689	2.49783	1.86581	1.52746	2.54342	1.2804	0	1.10744	3.03456	3.00282	3.1151	3.07099	2.41466	3.16121	2.25816	3.63759	0	0	2.07076	1.49305	0.953469	2.45714	1.92799	0	0	1.45976
Ampd2	3.94041	4.50398	4.83518	5.02493	5.11685	4.32566	5.31524	4.38262	4.6719	4.14917	4.43292	4.42309	4.07625	5.01701	4.9346	3.97883	4.51269	4.65806	4.67691	4.51264	5.07672	4.70366	4.40706	5.7432	4.56699	2.47983	2.42531	4.95391	4.17571	3.64316	4.40158	4.31927	4.07864	3.75304	5.77559	3.7284
Ampd3	5.81167	5.67968	5.76472	5.70665	5.11685	5.42337	4.83522	5.34761	5.64332	4.54373	4.68478	4.59942	6.27979	5.60576	5.65833	5.17992	5.42545	4.75378	5.66557	5.89394	5.82632	4.96272	4.90109	5.7099	5.58254	5.23368	5.21196	5.26649	4.94844	4.75556	5.64868	5.45669	5.54902	4.69852	5.15271	5.64437
Amz2	3.55636	4.50398	4.4369	4.46195	5.15526	5.6592	5.40324	4.38262	4.60748	4.45474	4.89914	4.65372	5.34593	4.83865	4.90584	4.45678	4.51269	4.92804	4.77494	4.60795	3.60267	4.79528	4.94684	4.17903	5.1925	4.08951	4.87844	3.0872	4.61321	4.54739	4.08073	4.31927	5.0353	4.51379	4.98785	4.67293
Anapc1	5.41657	5.76636	5.21542	6.04319	5.15526	6.03949	5.74384	5.92072	5.82428	6.02638	5.65646	5.8035	5.52232	5.82923	5.26416	5.81396	6.1771	6.20441	5.81131	4.97275	5.1912	6.58657	5.26842	6.18015	5.55957	5.74553	4.44389	5.83891	6.50191	5.85461	5.15589	5.28267	4.81338	6.46563	5.96493	5.42677
Anapc10	5.60119	5.55535	6.21271	5.41345	5.49175	6.89629	5.44531	5.48189	5.47299	5.89724	5.65646	6.14416	4.91131	5.79703	5.55096	5.88546	5.9608	5.77322	5.55953	6.5389	6.03999	5.75392	5.43819	5.58687	5.64932	6.12257	6.37442	5.83891	6.13661	6.14096	6.38222	5.7115	5.85897	6.12215	5.67069	5.02287
Anapc11	6.06462	6.03432	6.09047	6.13054	6.13487	6.34016	6.29701	6.01234	5.7062	6.30621	6.35798	5.8035	5.60304	5.99456	6.1131	5.67291	6.12599	6.31316	5.71581	5.79614	6.29169	5.78405	6.43756	6.28564	6.09491	5.68262	7.22524	6.01651	5.67666	5.497	6.41426	6.09527	6.26193	5.75626	6.05104	6.68
Anapc13	8.5143	8.74298	8.83403	8.4698	8.44028	7.93583	8.41604	7.99548	8.14851	8.16503	8.38084	8.2745	8.41857	8.58669	8.43597	8.34606	8.22818	8.13738	8.56713	8.81628	8.9329	8.61771	8.67654	8.67914	8.22844	8.61635	9.43397	7.52913	7.82108	8.02526	8.74952	8.36571	8.52912	8.21657	6.05104	7.59671
Anapc15	5.1512	5.40135	5.37355	5.80434	5.73936	5.86184	5.17228	5.92072	5.85235	5.42146	5.8056	5.8965	5.82118	5.58705	6.08771	6.00798	6.16026	5.97207	4.89607	5.07638	5.39605	5.7075	5.90019	5.69295	5.77427	5.47554	6.19236	5.26649	5.8198	5.72861	6.16405	5.81743	5.91594	5.83724	4.3368	5.53967
Anapc16	6.02543	5.92551	6.65609	5.78053	6.07603	6.03949	6.69588	5.19954	6.01019	6.30621	5.94075	6.43513	6.17807	6.41104	5.99517	6.09098	5.9608	6.06208	6.18863	6.19958	6.30446	5.89866	5.72747	5.72665	6.30281	6.38215	6.66594	6.24763	5.9747	6.16548	6.5211	6.20669	6.65897	6.46563	4.03261	6.46812
Anapc2	5.41657	5.47183	5.51605	5.47408	5.81327	4.57665	5.52593	5.48189	5.95947	4.92125	5.57568	6.12507	5.43682	5.58705	5.96759	5.95357	6.09088	5.71098	5.74835	5.50565	5.75365	5.46865	5.76626	5.77576	5.64932	5.14313	5.649	6.24763	6.06943	5.79299	5.60771	5.77861	5.63297	5.75626	5.67069	5.74198
Anapc4	5.41657	4.1642	5.43225	4.8979	5.43044	4.32566	4.83522	4.07788	4.84952	4.85324	4.23671	5.28971	5.03284	4.95998	4.84653	4.76551	5.2456	5.43109	5.38425	5.69122	5.07672	5.39246	5.40579	5.32617	5.13152	5.80581	5.25388	5.26649	5.261	5.497	5.03746	5.35482	5.11532	5.48186	5.30065	4.85848
Anapc5	6.45226	6.51511	6.35605	7.03724	7.02439	6.19765	6.95077	7.00112	6.96078	7.14893	6.75645	6.97242	6.37481	6.37877	6.78492	7.03391	7.09805	7.05751	6.30259	5.66928	6.34212	7.23083	6.65298	7.0818	6.5674	6.45924	5.88072	6.5075	7.03537	6.8268	6.45333	6.76541	6.48164	6.9753	7.19943	7.15787
Anapc7	3.94041	3.71891	3.96657	4.12639	3.71911	4.02161	4.39462	3.16087	3.95157	4.70677	4.1276	3.9016	3.53343	4.59818	3.95318	4.1818	3.67279	3.83575	4.20049	3.75192	4.08963	4.13056	3.47351	3.96985	4.07827	3.34435	4.51457	5.11865	4.25847	4.11549	3.55705	3.08499	3.8638	4.51379	3.11818	3.28587
Angel2	5.28998	5.61886	5.8533	5.42885	5.33329	4.79038	5.22152	5.60473	5.7062	5.59807	5.02617	5.14559	4.63242	5.89157	4.90584	5.2894	5.50761	5.56027	4.98068	5.60142	5.80849	5.89866	5.51612	5.0877	5.13152	5.39934	4.87844	6.01651	5.67666	5.497	5.41533	5.37231	5.54902	4.86225	5.15271	4.67293
Angpt1	4.52214	4.50398	2.62404	3.87978	2.917	0	1.80908	2.31378	2.11758	1.26017	1.90558	2.90837	3.53343	2.98249	2.3857	3.79302	1.81498	2.98692	3.4049	2.69078	3.60267	2.14307	1.95901	2.02008	2.47004	0	1.67162	4.3035	4.5489	4.58423	3.00431	2.90446	2.38069	4.30188	4.58789	5.02287
Angptl2	0.534577	1.86596	0	2.21998	0.953156	2.26614	1.17127	3.16087	0	2.37454	1.24689	2.71766	1.86581	2.86313	1.49115	2.84651	2.37784	3.27199	2.37754	0.831486	0	1.4375	0	2.5582	2.47004	0	1.67162	0	3.25341	1.14397	1.92963	0.9986	0.553399	3.37323	0	2.17033
Angptl4	2.19791	1.04127	2.40707	1.50051	0	0	2.86007	0	1.07944	1.26017	2.35611	1.51568	0	1.81162	2.00668	2.4025	2.12369	2.33377	3.03456	1.73922	3.1151	2.86087	2.65411	2.02008	2.81846	2.9759	2.69249	3.0872	3.25341	2.81751	1.74041	2.45714	0.553399	3.75304	4.98785	2.64429
Ank	3.50028	3.88309	2.81261	2.88811	4.08013	3.10781	4.83522	5.60473	4.05181	3.22827	4.60561	3.80894	3.15934	4.26305	3.24061	4.3597	3.57455	4.28349	3.76442	3.13671	2.55516	3.56322	3.2726	2.22258	3.22101	4.94294	3.43772	3.0872	4.33674	3.24325	3.08614	1.5831	2.09517	4.69852	5.67069	3.52404
Ank1	0.534577	1.63974	1.44445	1.50051	0.953156	4.32566	0	3.16087	2.94098	1.92238	1.24689	1.51568	0	1.17325	0.681414	0.965476	2.37784	0.657472	3.32084	3.13671	2.55516	0.650307	0.56689	1.50266	2.47004	4.43313	0	0	2.39728	3.64316	0	0.9986	1.52113	2.85626	4.98785	1.45976
Ankfy1	5.94368	5.99895	5.59525	5.41345	5.81327	4.97649	6.04678	6.39932	6.17484	6.45129	5.84059	6.0049	5.03284	6.19324	5.65833	5.76425	6.0549	5.72679	5.84179	5.48068	6.00911	6.09173	5.84085	5.82325	6.06261	4.71044	5.12427	5.93044	6.06943	5.69531	5.66208	6.17715	5.79966	5.91391	6.20921	6.07733
Ankhd1	5.6916	5.07892	5.1816	5.70665	4.9951	5.42337	4.5569	5.82288	5.3988	4.92125	4.96405	4.54301	5.14492	5.36338	4.99047	5.25382	5.04008	5.08351	5.23149	5.17306	4.88593	4.98883	4.85384	4.76989	4.74039	5.80581	2.91784	5.40059	5.17838	4.87933	4.66389	4.90418	4.462	6.05602	4.80168	5.09854
Ankib1	3.38113	0.612609	2.97936	2.59238	3.71911	0	3.28757	3.16087	2.71503	3.22827	3.58332	2.90837	2.65294	0.70274	3.41405	2.93903	1.42171	2.1583	3.13643	1.3556	2.55516	2.86087	1.95901	2.70065	2.00972	2.47983	1.67162	0	3.25341	1.7739	1.74041	2.31969	2.50472	3.75304	3.64666	3.28587
Ankle1	1.69714	1.04127	2.15159	2.59238	2.50602	0	3.28757	0	2.94098	1.26017	2.35611	3.22759	3.53343	2.86313	2.54342	2.64152	3.09687	2.1583	1.48465	2.29207	2.16472	3.07099	3.34273	2.40013	1.70942	0	1.67162	3.0872	1.64803	2.38808	2.72664	2.80495	2.24498	2.04288	0	1.45976
Ankle2	6.23752	6.04592	5.91635	6.13993	6.26349	6.19765	6.82895	6.52908	6.5624	6.38058	6.38194	6.23599	6.22983	6.31196	6.23374	6.77622	5.81783	6.19307	6.43843	6.18419	5.77217	5.92594	6.14552	6.51506	6.2464	6.66851	5.5175	6.56576	6.55199	6.60268	6.56457	6.41508	5.93811	6.78429	6.35174	6.57795
Ankmy2	3.31764	3.53362	3.60766	3.87978	3.91088	4.32566	3.8849	0	3.95157	3.4285	2.97572	3.80894	1.86581	3.69201	3.14539	4.104	4.51269	3.94794	2.37754	3.13671	1.92107	3.338	3.53471	4.31815	2.25816	0	3.28434	3.61443	2.88794	4.43083	2.24674	2.31969	2.50472	3.37323	4.80168	4.34035
Ankra2	4.06161	4.07644	4.69838	4.20004	3.23648	4.02161	2.86007	3.16087	4.23354	4.03101	3.73981	4.4843	4.91131	4.0609	4.21005	3.74257	4.28313	4.00092	3.69933	3.83307	4.58455	3.81747	3.75644	4.02506	4.31608	2.9759	4.64633	4.5543	3.67098	3.64316	3.86588	4.35489	3.81671	2.85626	2.27544	3.52404
Ankrd10	4.80276	4.03048	3.38801	4.63126	4.95212	2.26614	4.83522	5.19954	4.14554	4.45474	4.00955	5.02719	3.83022	4.30945	4.46792	4.104	5.36796	4.24007	4.37736	4.11851	4.08963	4.90903	4.37395	4.66951	4.61233	4.57843	4.0268	5.74117	4.99746	5.26703	4.40158	4.31927	3.8638	5.91391	4.58789	4.57036
Ankrd11	7.69882	7.5688	7.51954	7.54801	7.1815	7.52276	6.81297	7.24727	7.21973	6.96782	6.89607	6.90687	7.02892	7.56914	7.05103	7.08036	7.37108	7.0195	7.63977	7.75065	7.32068	6.74049	6.98991	7.09476	6.97574	6.38215	5.29462	8.04136	7.1373	6.91623	7.14921	7.39809	7.40356	7.60349	7.34288	7.43097
Ankrd12	8.0774	7.8624	7.95947	7.83483	7.09524	6.75074	6.20206	6.90876	6.89483	6.08686	5.97265	5.91884	6.93849	7.04622	6.98381	6.53817	6.49167	6.03693	7.82662	8.03418	7.50905	7.17507	7.33344	7.63243	6.90463	6.49629	4.98185	6.24763	6.70737	6.70661	7.17281	7.68721	7.38753	7.29493	7.19943	6.62987
Ankrd13a	7.24082	7.56477	7.06137	7.28158	7.52729	7.11033	7.22881	8.14467	7.31358	6.96782	7.45458	7.15289	7.74969	7.22025	7.37341	7.31424	7.07128	7.4916	7.35811	7.48792	7.40019	7.65846	7.01697	7.59643	7.26553	6.49629	6.3933	7.23811	7.37841	7.55867	7.01984	7.61926	6.93735	7.29493	7.96979	7.52995
Ankrd13c	5.38595	5.79414	4.87805	4.96281	5.19267	5.76408	5.12129	5.19954	4.84952	4.70677	4.60561	5.18299	4.77859	5.09855	4.68662	5.2357	5.33832	4.19531	5.36339	4.97275	5.04662	5.13628	5.11657	5.5497	5.73381	4.57843	4.36957	3.99972	4.41098	4.99332	4.90844	5.44021	4.99356	5.37743	5.87336	3.90738
Ankrd13d	3.10849	2.23363	3.96657	2.47861	1.92915	3.63588	1.17127	0	2.44702	1.26017	2.69893	0.948355	0	3.09273	2.54342	2.74766	1.81498	2.49019	2.92495	4.41057	2.55516	2.61483	3.85571	2.22258	1.70942	0	1.06547	3.99972	3.40643	2.21091	0.953469	4.04176	2.72475	2.04288	3.11818	3.7284
Ankrd16	4.6306	4.12099	4.4369	3.87978	4.23158	5.28923	3.46163	4.38262	4.73357	4.62755	4.00955	3.48882	4.07625	3.46486	3.14539	3.74257	4.34404	2.98692	4.37736	4.51264	4.25669	2.61483	4.37395	4.36169	2.81846	4.83137	3.70281	3.61443	3.67098	3.57156	4.66389	4.55191	4.11802	4.51379	4.3368	4.20995
Ankrd17	5.40134	5.6343	5.28077	5.96084	5.81327	5.14132	5.90324	5.19954	5.15014	5.32433	5.8056	5.38907	4.07625	5.79703	5.70916	5.68632	5.39699	6.07449	5.13633	5.48068	4.95237	5.22682	5.09641	5.69295	5.25101	4.83137	4.12042	5.74117	5.8468	5.26703	4.90844	5.473	4.99356	6.70019	6.54218	5.59297
Ankrd22	7.44771	6.91359	7.4853	5.89583	6.39769	5.86184	5.74384	6.58983	6.15244	5.32433	5.61663	5.8035	7.34277	6.09069	6.16258	5.17992	5.86014	5.22384	7.13631	7.3705	6.90865	6.12742	6.87629	6.59933	7.16261	6.16921	8.2466	5.26649	4.8977	5.45783	7.14444	7.24039	7.6718	4.30188	5.96493	3.90738
Ankrd23	2.45554	0.612609	2.15159	2.21998	1.52216	0	1.80908	0	1.68994	0	4.23671	0.948355	0	2.25264	3.24061	3.02597	0.879325	2.6313	1.76468	2.50515	1.92107	2.96975	1.76835	1.78444	0.81292	2.47983	1.67162	0	2.07076	2.38808	1.74041	2.69807	1.73885	2.85626	3.64666	0
Ankrd26	4.1371	3.32097	2.15159	4.4317	1.92915	2.26614	2.58698	3.69104	1.68994	3.9023	2.69893	3.70992	3.83022	3.6202	3.24061	3.93457	2.94788	3.43488	3.4049	2.50515	3.75934	2.47405	3.03912	3.50978	2.47004	3.88117	1.06547	4.7679	4.08791	3.77651	2.82526	2.31969	2.38069	4.51379	4.58789	4.34035
Ankrd27	4.24342	4.56973	4.37839	4.65764	4.36864	3.63588	4.63168	3.16087	4.54005	3.9023	3.20786	3.07679	5.14492	4.11415	4.50675	4.104	3.09687	3.89293	3.32084	3.75192	4.30834	4.60582	4.34007	4.76989	3.53539	4.43313	2.91784	4.5543	4.61321	4.21283	4.49442	3.75229	4.462	4.86225	2.27544	3.28587
Ankrd28	5.50472	5.24912	5.31236	5.21457	4.60896	3.10781	2.86007	3.69104	4.46931	4.54373	5.25092	3.48882	3.83022	4.44032	4.78468	3.93457	4.61509	4.44516	5.20828	4.89928	4.02934	5.43106	5.79155	5.6758	4.65629	4.94294	2.91784	3.61443	3.99443	4.0111	5.36704	4.66973	5.13465	4.69852	2.27544	4.45993
Ankrd33b	5.6276	4.32516	5.28077	2.59238	4.23158	3.10781	1.80908	4.07788	4.31649	5.37372	2.35611	4.2923	4.07625	4.39801	4.50675	4.39279	4.34404	4.19531	6.16472	5.85561	5.59633	4.08288	5.38932	4.22691	5.1925	4.27152	5.0309	4.7679	5.30059	5.19738	4.90844	5.44021	5.77524	4.69852	5.67069	5.59297
Ankrd37	1.88405	1.63974	1.84092	3.34301	3.49789	5.42337	4.00227	3.69104	2.11758	3.4285	0	2.49783	3.15934	2.25264	2.81498	2.52696	1.81498	2.75983	2.67705	3.57449	1.25914	3.49199	4.15756	3.16121	2.65474	2.47983	4.44389	0	2.07076	1.7739	2.24674	3.5824	3.66545	2.04288	0	0
Ankrd39	2.56893	3.46616	3.79825	2.9746	3.61274	4.02161	3.46163	2.31378	2.71503	3.22827	3.58332	3.80894	2.65294	2.43113	3.32994	2.93903	3.09687	3.64919	3.32084	3.57449	2.86212	3.81747	3.4096	3.65685	2.81846	3.63759	2.69249	2.24769	3.99443	2.54586	3.91149	3.45689	3.66545	4.0534	4.03261	3.00046
Ankrd40	4.46469	5.14512	4.54724	4.73401	4.76611	3.63588	4.30608	4.63408	5.00765	4.54373	4.89914	4.42309	5.03284	4.83865	5.0961	4.60534	4.40247	4.78432	4.67691	4.05227	4.58455	4.79528	3.99287	4.59849	4.56699	5.47554	5.07834	4.7679	4.08791	4.58423	3.86588	4.66973	4.76459	5.83724	5.43483	5.694
Ankrd44	6.01546	5.26905	5.64573	6.11158	5.81327	6.03949	5.52593	6.17978	5.64332	5.7554	5.4901	5.255	5.24892	5.82923	5.49412	5.34118	5.5599	5.87607	6.10315	6.0206	5.59633	5.60994	5.56094	6.30807	5.4884	4.94294	4.93107	6.01651	5.76424	5.47755	5.49239	5.93976	5.67318	5.14271	4.98785	6.21968
Ankrd46	4.80276	5.16653	4.83518	4.577	5.03683	4.02161	4.63168	4.63408	4.84952	4.45474	4.52185	4.8982	3.53343	4.35441	3.89582	4.25561	4.5648	4.59052	5.00782	5.04265	4.58455	4.79528	4.56208	5.65845	4.96673	5.14313	5.25388	3.0872	4.73382	5.09896	4.76674	4.99729	5.01458	3.75304	5.67069	3.52404
Ankrd49	4.80276	4.36274	4.18712	4.60439	4.86211	5.28923	4.39462	4.38262	4.73357	4.92125	5.57568	4.94249	5.75207	4.90059	5.14615	4.79055	4.75622	5.15538	4.743	5.07638	4.20313	4.82457	5.05524	5.00773	4.74039	4.71044	3.57635	3.99972	4.94844	5.19738	5.44665	4.69775	4.97224	4.86225	6.41805	4.45993
Ankrd50	0	1.04127	0	2.21998	0.953156	3.10781	3.0896	3.69104	2.71503	1.92238	2.69893	2.49783	3.53343	2.04892	1.77182	2.26629	2.37784	1.9585	1.76468	1.73922	2.37311	2.86087	1.28923	3.16121	2.25816	0	0	0	2.88794	2.00889	1.52258	1.80535	0.952392	0	0	3.00046
Ankrd52	3.10849	2.52637	1.84092	2.07091	3.23648	3.63588	1.80908	2.31378	3.46192	3.4285	3.20786	3.07679	3.15934	2.86313	3.70865	3.39603	3.57455	4.00092	3.23158	2.29207	1.92107	3.92956	2.53935	2.94923	2.81846	4.27152	1.67162	0	3.67098	3.24325	1.52258	2.99755	1.52113	4.30188	3.11818	4.34035
Ankrd54	3.55636	3.59806	3.12881	4.12639	4.86211	3.10781	4.00227	3.16087	4.31649	3.22827	4.96405	4.42309	3.15934	3.9481	3.95318	3.79302	4.28313	3.89293	3.76442	3.47686	2.99415	4.22146	4.34007	3.96985	4.2602	3.34435	3.28434	3.61443	3.78704	3.49621	3.86588	3.45689	3.61128	3.37323	2.27544	3.00046
Ankrd9	4.55003	4.12099	4.25373	3.46753	4.71561	3.63588	4.00227	4.07788	1.68994	2.37454	3.40777	2.71766	3.83022	3.76042	3.49353	3.45988	3.09687	2.49019	3.8864	4.78155	3.33026	3.81747	3.70412	4.02506	3.33359	0	3.92668	4.5543	3.25341	2.68807	4.2677	3.64128	4.26559	2.04288	0	1.45976
Anks1	5.1693	5.12339	4.99948	5.16025	5.19267	4.32566	4.63168	6.25673	5.15014	5.10793	3.88097	4.85251	5.43682	3.9481	5.17053	5.2357	5.2456	4.98175	4.95303	5.81623	4.62585	5.2486	4.53238	5.06153	4.42174	5.14313	3.1127	6.44679	5.92489	5.02046	4.60958	5.12656	5.15372	5.75626	6.54218	5.23891
Anks3	3.85355	3.15952	3.7061	3.20671	3.3731	4.32566	2.24984	3.16087	2.94098	3.6043	2.69893	3.07679	3.53343	4.2151	3.04344	0.965476	4.45864	3.83575	4.57173	4.30074	4.08963	2.86087	3.70412	3.72512	3.0989	3.34435	2.42531	3.61443	3.54476	3.148	3.55705	3.99737	4.07864	3.75304	4.80168	4.20995
Ankzf1	4.52214	3.983	4.04389	3.20671	3.71911	4.32566	3.28757	4.07788	4.23354	2.37454	2.69893	3.80894	4.77859	4.0609	3.77378	2.64152	2.94788	3.08833	4.24678	4.69736	4.78015	3.69594	4.72848	4.7372	4.31608	2.9759	4.58195	2.24769	3.99443	3.33259	4.52408	3.69785	4.43107	2.04288	3.64666	2.17033
Anln	4.20884	4.98565	4.54724	5.24968	4.43258	3.10781	4.30608	5.03452	5.05673	4.03101	5.02617	4.94249	3.83022	4.52141	4.30122	5.06143	4.61509	4.98175	4.95303	4.82187	5.1062	4.67178	5.09641	5.32617	5.06785	6.07437	3.43772	3.99972	4.84512	5.26703	4.66389	4.80465	4.66175	4.69852	3.11818	5.17043
Ano10	5.38595	5.07892	5.07511	4.91986	4.55253	4.57665	3.61693	4.63408	4.79271	4.62755	4.23671	3.9016	4.63242	5.15046	5.77427	3.45988	4.51269	4.10139	5.36339	5.55433	5.55417	5.31202	4.92414	5.21185	5.55957	3.63759	5.85371	3.99972	4.73382	4.50957	4.99572	5.64111	5.49021	2.04288	4.98785	4.57036
Ano6	5.78844	6.6805	6.30983	6.43506	6.50567	6.12073	5.31524	6.17978	6.49277	6.56195	6.4515	6.12507	6.90704	6.32331	6.37686	6.32328	5.83914	6.02419	5.59575	6.24477	6.35446	6.2295	5.95718	6.44595	5.81362	6.07437	4.82382	6.09774	6.04632	6.05168	5.50732	5.68375	5.67318	6.30409	5.87336	5.87703
Anp32a	8.91902	9.40771	9.32321	9.01502	8.16716	8.20162	8.3456	8.14467	7.77604	8.99114	8.01781	8.08499	8.96825	8.28091	8.59534	8.57053	8.53289	8.55778	8.67051	8.93592	7.96027	9.06391	8.11019	8.38155	8.66756	8.14245	8.04048	9.15705	7.75848	8.72331	8.31082	8.2803	8.05833	8.49136	8.71328	8.7827
Anp32b	8.50364	8.68482	8.5156	9.07742	8.89362	8.77871	8.89344	8.88768	8.69737	8.54508	8.97621	8.98775	9.09227	8.76792	8.79873	9.02827	9.01252	9.08354	8.13117	8.02989	8.46866	8.94725	8.4411	8.91844	8.61283	8.95927	7.97306	8.70447	8.76579	8.68988	8.19341	8.11615	8.25882	9.00222	8.5748	8.95544
Anp32e	7.47706	8.26104	7.61131	8.51017	7.88812	8.18283	8.19347	8.08261	7.88196	8.24682	8.39856	8.23942	8.29038	7.79385	8.07818	8.44403	8.16629	8.43079	6.97379	6.10471	7.37013	8.27724	7.61779	8.17739	7.93919	8.07056	7.16059	6.62176	8.04742	8.25116	7.58182	7.48103	7.01762	8.66778	8.23186	8.02289
Antxr2	5.75288	5.16653	5.69451	3.92392	4.36864	4.97649	4.1108	5.82288	5.10419	4.03101	4.60561	4.35918	4.91131	4.86995	4.87649	4.51805	4.92519	4.19531	5.18469	6.13703	5.46595	4.50087	5.40579	4.89371	4.81985	5.14313	5.16878	3.99972	4.48159	5.37613	4.93076	5.66968	5.56335	2.04288	4.80168	3.52404
Anxa1	13.9071	13.7056	14.0546	12.6807	12.8741	13.3213	12.6513	13.1353	13.4622	12.1625	12.4085	12.676	13.7425	13.2501	13.6782	12.0583	12.3166	12.0464	13.8494	13.9423	13.8455	13.2276	13.7296	13.2827	13.5851	12.7568	14.3986	12.1127	11.6181	11.9096	13.9962	14.0883	14.3081	11.3956	11.7119	11.6133
Anxa11	4.37398	3.983	4.79101	4.20004	3.99798	4.02161	3.61693	4.07788	4.23354	4.70677	4.1276	4.35918	4.77859	4.0609	4.58141	3.79302	3.09687	4.05203	4.83678	4.30074	4.666	4.17673	4.85384	4.7372	4.74039	2.9759	4.44389	3.99972	4.08791	4.06424	4.30235	4.83019	4.95059	2.04288	4.58789	4.06658
Anxa2	10.172	10.2222	10.2717	9.16508	9.69764	10.3904	9.91456	10.3129	10.4354	10.3612	10.3291	10.2958	10.3201	10.1244	10.3106	10.208	10.3365	10.2632	10.3695	10.4099	10.1542	9.73057	9.97236	9.65895	10.4255	10.2834	10.6338	10.4507	10.142	10.1427	10.4226	10.6581	10.7005	9.98313	10.2871	10.1266
Anxa3	9.31209	9.35507	9.42788	8.89956	8.89929	8.83997	8.18729	8.53287	8.85829	8.31161	8.45611	8.46494	9.38256	8.71073	9.29659	8.24094	8.37038	8.08005	9.31259	9.37753	9.52918	9.26293	9.40869	9.19308	9.1103	8.45632	9.85928	7.69493	7.73699	7.97064	9.48389	9.64825	9.66066	7.35116	7.23665	7.73353
Anxa4	5.98513	5.57149	5.83166	5.45916	5.68789	6.03949	6.07384	5.19954	5.6751	6.11617	6.49608	6.23599	6.12439	5.87623	5.64098	5.93122	6.01799	6.03693	5.64843	5.42941	5.69665	5.31202	5.3558	4.76989	6.1108	6.02451	5.74031	5.40059	5.79229	6.42109	5.36704	5.53642	5.38114	6.24595	6.41805	6.88621
Anxa5	8.17467	8.30514	7.72133	8.24249	8.88793	9.36674	9.05498	8.93528	9.00929	8.69831	8.94439	8.89782	9.28807	9.16646	8.79089	8.60271	8.69363	8.60774	7.80357	7.70288	7.88997	8.31385	7.76552	7.91047	8.82991	8.60791	8.70898	8.30348	8.40164	8.14417	8.09308	8.10312	8.00681	8.10653	8.17547	8.03257
Anxa6	5.66634	5.76636	5.54294	6.12109	6.49073	7.11033	6.12651	7.39075	7.03614	6.88509	7.19544	6.74123	6.17807	6.99745	6.6784	6.98593	7.00682	7.1889	5.50344	5.91273	5.67714	5.79888	5.80404	5.94275	6.57887	6.21438	4.87844	7.12641	6.84764	6.87964	5.68852	5.81743	6.18984	6.30409	6.90791	6.8207
Anxa7	5.83453	6.01084	5.78738	5.83933	5.52146	6.8009	6.42866	6.46566	6.72305	6.05694	6.30885	6.25368	7.11401	6.69066	6.49744	6.55288	6.35038	6.5449	5.84179	5.79614	5.79044	5.9394	6.05442	5.86923	6.3965	6.3007	7.04595	6.62176	6.06943	6.09062	6.57169	6.37227	6.65228	6.46563	6.05104	6.03943
Anxa9	2.45554	2.23363	2.15159	2.47861	2.24623	2.26614	2.58698	0	2.44702	2.37454	1.24689	1.92182	0	1.52746	2.54342	2.26629	0.879325	2.75983	2.92495	3.83307	1.25914	2.74309	2.53935	2.70065	2.65474	0	2.42531	2.24769	2.88794	3.24325	0.953469	2.99755	2.72475	3.37323	0	2.17033
Aoah	3.94041	4.83335	5.56933	5.12286	3.3731	4.97649	4.1108	4.84815	4.6719	0	2.69893	2.90837	3.53343	4.26305	4.1622	4.1818	3.76476	2.49019	4.86673	5.17306	3.96643	4.50087	4.92414	4.83312	4.01215	1.71772	4.36957	0	3.25341	3.04603	4.7417	4.45676	4.76459	2.04288	4.03261	0
Ap1ar	3.25124	4.39936	4.11728	4.60439	3.49789	3.10781	4.89716	2.31378	3.72742	4.62755	3.40777	4.35918	2.65294	4.95998	4.11272	4.02178	4.08328	4.28349	3.23158	3.83307	4.30834	4.76538	4.30537	4.12951	3.62661	3.88117	3.43772	4.5543	4.84512	3.95593	3.7701	3.31941	3.61128	5.37743	5.96493	4.76869
Ap1b1	5.22226	5.73804	5.43225	5.8161	5.92862	5.86184	5.74384	6.58983	5.87989	5.46768	5.73295	5.48203	5.03284	5.67828	6.15037	5.30687	5.94123	5.86181	5.13633	5.64701	5.39605	5.59301	5.21333	5.7432	6.14205	5.74553	4.44389	5.11865	6.43232	5.60853	5.44665	5.40666	5.05573	5.37743	6.81252	6.21968
Ap1g1	5.8001	5.40135	5.31236	5.16025	5.95063	5.86184	4.47804	5.48189	5.36022	4.62755	4.96405	4.98546	5.82118	5.17573	4.78468	5.2357	4.61509	5.54251	5.16071	5.48068	5.41973	5.27005	5.19449	5.6051	4.85799	3.88117	4.20834	5.63633	5.51775	4.90869	4.95274	4.90418	5.20947	5.14271	5.43483	4.94302
Ap1g2	3.55636	3.71891	4.18712	4.577	4.55253	4.32566	4.1108	4.63408	4.39492	5.2732	3.88097	5.14559	3.83022	4.98878	4.30122	4.3597	4.61509	4.48289	4.37736	3.47686	3.22668	3.8746	4.07757	4.66951	4.1415	3.63759	3.57635	4.95391	4.25847	4.50957	3.9557	3.90428	3.81671	5.26484	4.98785	3.90738
Ap1m1	6.7515	6.61971	7.07984	6.66052	6.50567	5.86184	6.56845	6.25673	7.18704	6.40453	6.33362	6.69019	6.58812	6.95429	6.86928	6.16946	6.81577	6.40448	6.81387	6.67719	6.57081	6.75577	6.98991	6.36267	6.54419	7.03873	7.27699	6.5075	6.3212	6.43124	6.8487	6.92796	6.8755	6.78429	6.41805	6.40991
Ap1s1	6.18513	6.27014	6.24582	6.34864	6.07603	5.42337	6.12651	5.60473	6.15244	6.68443	7.09757	6.92905	6.46395	5.93661	6.21041	6.3488	6.55744	6.44328	5.95766	5.55433	6.40278	6.43338	6.06484	6.6441	6.42219	6.79285	6.27612	6.01651	6.41438	6.89438	6.48384	6.32815	6.07447	6.74285	6.13229	6.62987
Ap1s2	7.38328	7.58081	7.51276	7.02716	7.33994	7.76944	7.58925	7.61192	7.27262	7.94581	7.49906	7.33836	7.80192	7.47048	7.35757	7.58867	7.13298	7.46827	7.45987	7.61382	7.4924	7.21433	7.21224	6.87198	7.62206	7.03873	7.90233	7.30804	7.28279	7.26726	7.35716	7.264	7.52938	7.07883	7.70348	7.62257
Ap1s3	4.24342	4.60152	3.88486	3.78723	3.99798	4.32566	3.8849	4.38262	2.71503	4.70677	3.40777	4.14845	4.28637	3.6202	4.42802	3.10797	3.85122	3.89293	4.20049	3.00282	3.83172	4.03356	4.64768	3.85267	3.43802	4.43313	5.58475	3.0872	3.99443	2.93629	4.2322	4.80465	4.36714	2.85626	3.11818	3.7284
Ap2a1	2.67406	2.06148	1.84092	2.07091	2.7261	2.26614	2.58698	2.31378	1.68994	4.03101	2.97572	3.22759	3.53343	2.25264	2.54342	2.74766	2.12369	2.87784	1.48465	2.50515	2.37311	1.94392	2.53935	2.70065	2.00972	4.08951	2.09713	3.0872	2.66337	2.54586	2.72664	2.58263	2.50472	2.04288	2.27544	3.00046
Ap2a2	6.78122	6.82886	6.69257	6.17688	6.75109	6.64486	6.54929	6.75809	6.30242	6.90202	7.31224	6.92905	7.81891	6.5137	6.80842	6.78247	6.50507	6.72889	6.37732	6.37242	6.74959	6.96095	6.4535	7.08829	6.68878	6.42121	6.37442	6.38341	6.97546	6.47114	6.32438	6.82377	6.35551	5.98672	6.35174	5.59297
Ap2b1	4.87069	4.39936	4.64974	5.04505	4.86211	4.97649	4.00227	3.69104	4.39492	5.32433	5.14292	4.70604	4.46974	4.77394	5.17053	5.2357	5.2456	4.81424	4.37736	4.05227	4.30834	5.27005	4.26981	5.43208	5.25101	4.71044	4.58195	4.5543	5.09075	4.81877	4.60958	4.55191	4.15635	6.05602	4.3368	5.09854
Ap2m1	6.36074	6.788	6.44426	6.4727	6.78822	6.34016	6.29701	6.39932	6.19691	6.88509	6.66179	6.63728	6.06863	6.50376	6.45835	6.57468	6.50507	6.78284	6.56257	6.16864	6.2788	6.46162	6.34663	6.60839	6.69933	6.85123	6.29633	5.74117	6.3212	6.58461	6.62741	6.49708	6.67226	6.30409	6.65646	6.52408
Ap2s1	5.70407	6.08016	5.74169	5.83933	6.20977	6.34016	5.22152	5.34761	5.61083	5.32433	5.3514	5.7296	6.32808	5.81322	6.06187	5.67291	6.12599	5.80336	5.84179	5.71282	6.09984	6.10372	6.10574	5.82325	5.97853	5.47554	6.71179	4.3035	4.94844	5.62631	5.75258	6.20669	6.12367	4.69852	4.98785	5.23891
Ap3b1	6.16723	6.41133	6.21271	6.32415	6.1914	6.46986	6.38609	7.00112	6.52801	6.02638	6.33362	6.25368	6.37481	6.8245	6.3873	6.6587	6.37977	6.53595	6.24674	6.19958	5.96151	5.87085	6.13568	6.07943	6.37035	6.25819	4.87844	6.17463	6.91297	5.95651	6.07667	6.29186	6.02354	6.24595	5.77559	6.43931
Ap3d1	5.96456	5.73804	5.8533	5.8161	5.46142	5.86184	5.99107	5.60473	5.57758	5.79219	5.57568	5.18299	5.67948	6.02269	5.53226	6.08086	5.92138	5.45027	5.38425	5.96767	5.59633	5.50529	5.1754	5.88424	5.53623	5.54792	3.43772	6.24763	6.09217	5.79299	5.49239	5.37231	5.36487	5.83724	5.96493	5.53967
Ap3m1	5.81167	5.73804	5.78738	5.21457	5.92862	5.76408	5.44531	5.71793	5.73664	5.59807	5.61663	5.02719	5.52232	5.62424	5.99517	5.99726	5.90125	5.8182	5.13633	5.26367	5.65736	5.99198	5.63268	5.65845	6.07885	5.23368	5.61723	5.63633	5.8198	5.39699	5.4773	6.14699	5.8473	5.14271	4.80168	5.23891
Ap3m2	3.10849	1.63974	2.62404	2.59238	2.50602	3.63588	1.80908	3.69104	2.11758	3.9023	1.90558	1.51568	3.53343	1.17325	2.3857	2.64152	3.23192	2.33377	3.13643	2.04197	1.92107	1.71282	2.65411	2.94923	1.32971	2.47983	3.1127	3.61443	2.07076	3.148	1.26591	2.16775	3.00236	0	3.64666	3.00046
Ap3s1	6.72116	6.68792	7.08899	6.76128	6.26349	6.12073	6.15213	5.34761	6.21863	6.08686	5.87476	6.32233	6.46395	5.76409	6.72031	6.111	5.9608	6.04956	6.44837	6.56288	6.66297	6.85847	7.07991	7.06214	6.34371	6.21438	6.71179	5.26649	5.92489	6.03846	6.98826	6.95722	6.81088	6.05602	5.55758	5.78842
Ap3s2	4.02233	4.07644	2.81261	4.2355	3.61274	3.10781	3.61693	3.69104	4.31649	4.54373	4.00955	3.6036	3.15934	3.88821	4.11272	4.39279	3.23192	4.44516	4.45828	3.83307	2.99415	4.17673	4.03584	4.22691	4.4718	3.63759	4.2912	4.5543	3.89446	3.64316	4.66389	3.75229	3.71765	3.37323	4.3368	4.94302
Ap4b1	4.09985	3.53362	3.50201	3.68833	3.71911	2.26614	3.46163	4.63408	4.05181	1.92238	2.97572	3.36411	3.53343	3.6202	3.77378	3.18555	3.85122	3.83575	4.15267	3.75192	3.96643	2.86087	3.75644	2.94923	3.0989	2.47983	3.43772	0	3.54476	3.04603	4.04025	3.5824	4.23009	4.0534	4.98785	3.28587
Ap4e1	2.86379	2.52637	1.84092	2.79611	1.52216	3.63588	1.17127	3.16087	2.71503	2.7183	1.90558	1.51568	2.65294	2.58994	2.81498	2.74766	1.81498	1.9585	1.76468	2.50515	3.22668	3.16559	2.41466	2.70065	2.00972	0	1.67162	0	2.88794	2.54586	2.82526	2.80495	2.61893	0	0	1.45976
Ap4m1	3.94041	3.59806	4.25373	5.12286	5.52146	5.5461	4.39462	4.38262	4.84952	4.3599	4.68478	4.4843	2.65294	4.77394	4.68662	4.42514	4.84318	5.15538	3.8864	3.9099	4.30834	4.26484	4.64768	3.96985	4.31608	4.71044	4.0268	3.0872	5.13523	4.25915	4.30235	4.52088	3.55501	4.30188	3.11818	3.90738
Ap4s1	5.18717	5.22892	5.43225	5.16025	4.81491	5.5461	4.63168	3.16087	5.10419	6.05694	4.60561	5.62477	5.34593	4.98878	4.61734	4.60534	5.5599	5.26774	5.36339	4.93648	4.70506	4.67178	5.07597	4.31815	4.78066	5.39934	5.649	5.40059	4.48159	4.78751	5.41533	5.14703	5.50514	4.0534	5.15271	4.57036
Ap5b1	3.66237	3.83041	3.26422	3.40661	3.08557	4.02161	4.1108	3.16087	1.68994	3.22827	2.35611	3.48882	3.83022	3.9481	2.54342	3.02597	3.93279	3.35573	3.23158	3.9099	3.42689	3.49199	4.11812	4.31815	3.7124	3.34435	4.12042	3.61443	3.89446	3.24325	4.04025	4.42359	4.66175	4.51379	2.27544	4.06658
Ap5m1	3.80808	3.83041	3.96657	2.9746	3.23648	4.97649	4.21174	3.69104	4.31649	3.9023	2.35611	4.07077	0	3.09273	2.81498	3.69029	4.01	3.94794	3.8267	4.60795	2.71679	3.81747	3.2726	4.17903	2.96548	4.27152	4.12042	0	3.67098	3.89857	4.04025	3.31941	3.71765	0	4.58789	4.34035
Ap5s1	3.76112	3.32097	4.4369	3.96675	2.917	4.57665	4.83522	4.84815	5.32058	4.25838	2.97572	3.98866	4.63242	4.67107	4.87649	4.1818	4.08328	3.94794	4.1032	4.05227	3.90065	3.25437	3.75644	3.34599	4.81985	3.88117	3.28434	3.99972	3.78704	3.77651	3.61333	3.95158	4.15635	3.75304	4.3368	5.09854
Ap5z1	4.43508	3.46616	3.96657	2.47861	3.61274	5.28923	2.86007	4.07788	5.15014	4.14917	4.23671	4.8982	4.07625	4.35441	4.9628	3.84176	3.35539	4.55553	3.23158	4.05227	3.68313	2.31803	4.15756	3.65685	3.79337	1.71772	2.42531	4.5543	4.67477	3.49621	3.91149	4.48918	3.90941	4.30188	0	0
Apaf1	6.3289	6.21983	6.01566	6.61412	6.29823	5.6592	5.96238	6.52908	6.12969	6.2007	6.4055	6.28841	7.24555	6.44261	6.12563	6.22564	6.30515	6.19307	5.76435	5.93128	5.69665	6.44286	6.2767	6.57178	6.34371	5.68262	5.29462	5.11865	5.92489	5.94238	6.42216	6.37227	5.69938	5.91391	6.13229	5.64437
Apba1	3.31764	3.07147	1.84092	3.13342	4.76611	3.10781	4.47804	2.31378	4.14554	2.9957	3.73981	3.98866	1.86581	4.26305	4.61734	5.0407	4.66368	4.28349	2.37754	2.04197	2.71679	3.49199	1.95901	4.02506	3.22101	2.47983	1.06547	0	3.78704	3.41672	3.6675	3.38978	2.50472	3.37323	4.03261	4.67293
Apba3	4.31017	4.56973	2.40707	4.73401	4.55253	3.63588	4.39462	4.63408	4.73357	4.3599	4.23671	5.28971	3.83022	4.90059	4.87649	4.02178	4.34404	3.64919	4.1032	4.74007	4.08963	4.98883	4.47108	4.31815	4.07827	4.94294	3.92668	4.95391	3.89446	4.34754	3.99859	4.52088	4.30024	5.26484	2.27544	4.20995
Apbb1ip	7.46613	7.41182	7.6916	7.25158	7.32317	6.98575	6.9653	7.55211	7.47575	7.58607	7.16815	7.33005	7.41162	7.56914	7.36287	7.27484	7.54976	7.44933	7.63977	7.31508	7.26295	7.31063	6.90554	7.24764	7.43284	6.98759	6.72675	7.55812	7.3968	7.44306	6.97758	7.41928	7.26132	7.29493	7.67664	7.84758
Apbb3	1.48237	2.06148	0	1.24615	0	2.26614	0	0	0	0	1.90558	3.07679	0	1.52746	2.00668	1.75778	0.879325	2.87784	1.76468	2.29207	3.51745	2.14307	2.27817	2.40013	0	1.71772	0	0	1.04755	2.00889	2.24674	2.99755	1.52113	0	0	3.00046
Apc	4.97724	4.69288	4.31741	4.68355	4.81491	3.10781	4.1108	4.07788	2.71503	4.70677	4.1276	4.07077	4.46974	4.16551	4.21005	4.45678	4.80036	4.87226	4.83678	4.46251	3.60267	3.63111	4.23336	4.36169	3.53539	4.57843	1.06547	5.11865	4.79054	4.54739	4.04025	4.38965	3.81671	4.0534	5.55758	4.67293
Apeh	3.55636	4.20615	4.11728	4.60439	4.76611	3.10781	4.1108	4.07788	4.23354	4.14917	4.33815	5.18299	4.77859	4.98878	4.11272	4.21918	3.57455	4.65806	4.95303	4.18185	4.81628	4.76538	4.53238	4.98006	4.42174	4.94294	4.70795	3.99972	4.94844	4.78751	3.9557	4.12664	3.71765	4.51379	4.98785	4.76869
Apex1	4.99764	4.85988	4.69838	5.53227	5.73936	4.32566	5.48618	4.63408	5.23788	5.7554	5.69521	6.21808	5.82118	5.82923	5.89627	5.63192	6.40857	6.68099	4.67691	4.18185	5.16342	5.85674	5.0342	5.65845	5.60514	5.97286	5.76951	5.83891	6.04632	6.79571	5.36704	4.99729	5.22759	6.51569	5.77559	6.46812
Apex2	3.03144	3.59806	0.895917	3.20671	3.49789	2.26614	3.28757	0	3.13628	3.76098	0	1.92182	0	2.43113	1.14236	3.02597	3.57455	3.7762	3.23158	1.73922	2.71679	3.25437	2.27817	2.94923	2.65474	0	2.42531	0	3.08222	3.49621	3.16357	2.69807	0.553399	3.75304	0	3.00046
Aph1a	4.97724	5.16653	4.54724	4.36922	4.71561	5.5461	5.01357	4.38262	5.47299	4.98619	4.68478	5.255	5.03284	4.77394	5.04425	5.45522	5.27717	4.92804	4.41839	4.3567	4.40641	4.08288	4.07757	4.92307	4.31608	4.57843	3.81908	4.3035	4.84512	4.43083	4.63699	4.24527	4.78919	5.00929	4.03261	4.57036
Aph1b	6.35285	5.70916	5.97675	5.00452	5.43044	5.86184	5.22152	5.19954	5.64332	4.70677	4.43292	4.75653	6.01063	6.05028	5.79009	4.57682	5.1465	4.92804	6.35636	6.58648	6.23943	5.39246	6.08543	5.41151	6.21735	5.31889	7.10441	3.99972	4.94844	5.1242	5.86116	6.36356	6.54802	5.00929	4.3368	5.48433
Aph1c	5.6916	5.20842	5.67033	4.46195	4.55253	4.97649	5.31524	4.63408	5.43637	4.45474	4.75983	5.02719	5.03284	5.3187	5.56942	5.35804	5.30807	5.22384	5.61353	5.66928	5.48851	5.06443	5.6466	5.06153	5.73381	5.68262	6.89516	5.26649	4.5489	4.72289	5.66208	6.37227	6.18984	3.75304	4.80168	4.57036
Api5	7.11577	7.18411	6.93513	7.12495	7.19999	7.14958	7.65346	6.81008	6.92157	6.79732	7.32465	7.50268	6.9994	7.09339	7.05103	7.31424	7.31133	7.46827	6.89604	6.90071	7.05189	7.10518	7.1003	7.0818	7.03522	7.29152	7.39409	7.00533	7.19096	7.16759	7.16341	7.27334	7.34253	6.86375	6.81252	7.15787
Apip	5.74083	6.08016	6.29409	6.0729	5.81327	5.42337	6.07384	5.82288	6.08307	5.67888	6.4055	6.28841	6.22983	6.47351	5.65833	6.18843	5.77423	5.94528	6.16472	6.07165	6.39085	6.15074	5.84085	5.97114	5.36136	6.49629	6.25563	4.95391	6.06943	5.43783	6.70068	5.59717	6.35551	5.75626	5.15271	5.53967
Apitd1	5.30643	5.67968	5.43225	5.39788	5.43044	5.5461	5.35991	5.71793	4.39492	5.79219	5.14292	5.4517	5.60304	4.70618	5.47467	5.58973	5.63494	5.35173	5.06061	4.86109	4.98448	5.22682	5.30401	5.58687	5.30724	5.23368	4.98185	4.95391	5.261	5.22098	5.41533	5.12656	5.29786	5.14271	4.03261	5.96052
Aplf	1.22993	2.52637	0	1.90464	0	2.26614	1.80908	0	3.13628	1.92238	3.58332	1.51568	1.86581	3.09273	2.2086	2.74766	1.42171	2.49019	1.48465	0	1.25914	2.31803	0.56689	2.5582	1.32971	0	2.69249	0	0	2.38808	0	1.32025	2.38069	4.0534	0	3.52404
Aplp2	5.44656	6.0914	5.1816	5.66824	6.34882	6.19765	5.74384	5.60473	5.43637	6.38058	5.97265	5.21945	6.01063	6.10392	5.58765	5.96462	5.5599	5.71098	4.71033	5.04265	5.29726	5.8281	5.11657	5.34798	5.73381	5.80581	4.76705	5.74117	6.15833	5.71205	5.03746	5.06337	4.88362	5.48186	5.77559	5.694
Apmap	4.06161	4.1642	3.7061	4.9415	4.23158	2.26614	4.30608	3.69104	3.60077	3.9023	3.73981	4.35918	3.53343	3.6202	4.38698	4.25561	4.66368	4.24007	4.05198	3.57449	4.58455	4.30696	4.19596	4.17903	4.20207	2.47983	4.44389	4.7679	4.48159	4.21283	3.9557	4.04176	3.55501	3.75304	4.98785	4.67293
Apoa1bp	6.67124	7.10316	6.55406	6.63419	6.54958	6.12073	6.66061	6.17978	6.52801	6.2007	6.15052	6.80259	6.9994	6.13001	6.29048	6.111	6.74978	5.95874	6.75102	6.79327	6.76816	6.96095	7.12538	6.72134	6.31657	6.49629	7.869	5.63633	5.51775	6.25961	6.93404	6.38955	6.79275	5.75626	6.81252	5.96052
Apoa2	2.56893	2.06148	1.84092	1.24615	1.92915	0	1.80908	0	1.68994	2.37454	2.69893	0	1.86581	1.81162	1.14236	0.965476	1.81498	1.10744	2.53505	1.73922	1.62774	1.09694	0.972806	1.50266	2.96548	0	2.42531	0	1.64803	1.14397	1.74041	0	2.09517	0	0	2.17033
Apobec1	5.58779	5.90018	6.16158	5.97139	5.90628	6.98575	6.34224	5.92072	6.34255	6.56195	6.15052	6.37175	6.12439	6.27736	5.26416	6.48546	6.39424	6.28138	5.82663	5.5302	5.82632	5.41189	5.45411	5.6758	5.36136	4.71044	5.44696	6.9626	6.17972	5.92812	5.35058	5.65547	5.39724	6.35997	6.71038	6.9283
Apobec3	4.87069	4.24692	4.11728	4.54909	4.55253	5.76408	4.83522	4.07788	5.00765	4.45474	5.02617	5.38907	3.53343	5.22498	4.21005	4.57682	5.39699	5.31035	4.37736	3.98284	3.90065	4.67178	3.12122	4.56163	4.93139	4.27152	4.82382	5.11865	4.41098	5.53515	4.30235	4.80465	4.76459	4.69852	5.15271	4.57036
Apobr	8.29286	8.02652	8.39167	7.46828	7.50516	8.29209	7.20453	7.64092	7.92885	8.04822	7.48807	7.55354	7.99375	7.842	7.99868	7.45797	7.48363	7.37602	7.87163	8.2783	7.55788	7.71038	7.54157	7.57347	8.2357	7.41277	7.28712	8.08185	7.90697	7.79708	7.75756	8.19197	8.18888	7.95148	7.96979	7.99346
Apoc1	1.69714	2.06148	0	2.9746	2.917	3.63588	3.0896	0	0	1.92238	2.35611	2.23839	3.15934	2.98249	1.14236	0.562039	2.12369	1.9585	1.76468	1.73922	3.1151	1.4375	1.54859	0	2.00972	1.71772	3.1127	3.0872	1.64803	2.54586	0	0	1.92799	0	0	0
Apoc2	4.80276	5.00954	5.4032	5.79248	6.15396	5.86184	6.25031	6.25673	5.10419	6.17307	5.73295	5.42073	5.43682	5.79703	4.34474	5.86202	5.77423	5.56027	4.86673	4.78155	5.29726	4.46412	4.99118	4.70375	4.01215	3.63759	5.5175	4.5543	5.04486	4.87933	4.49442	3.45689	3.4354	6.41377	5.67069	6.00051
Apoc4-apoc2	4.77939	5.00954	5.4032	5.79248	6.15396	5.86184	6.25031	6.25673	5.10419	6.17307	5.73295	5.42073	5.43682	5.79703	4.34474	5.86202	5.77423	5.56027	4.86673	4.78155	5.29726	4.46412	4.99118	4.70375	4.01215	3.63759	5.5175	4.5543	5.04486	4.87933	4.49442	3.45689	3.4354	6.41377	5.67069	6.00051
Apoe	7.45511	6.91359	7.32415	8.54768	7.92193	8.34376	6.69588	6.75809	6.5624	7.48857	6.86241	6.53974	5.88714	6.42164	6.07485	6.94747	7.45631	6.68909	7.54569	7.53112	7.02899	7.21985	6.99536	6.56248	5.99574	6.07437	3.81908	8.04136	7.54428	7.61763	7.26793	6.54412	6.68543	7.50779	7.593	7.35587
Apol11b	0	0	0.895917	0	2.50602	0	2.58698	0	0	2.37454	2.69893	2.90837	0	2.58994	2.00668	0.562039	2.94788	1.10744	2.67705	1.3556	1.25914	0.650307	0	0.688148	2.47004	5.14313	1.67162	5.40059	4.84512	5.62631	1.52258	1.32025	1.73885	4.51379	5.15271	3.00046
Apoo	3.10849	2.52637	3.26422	3.05619	2.7261	3.10781	2.58698	2.31378	2.94098	3.4285	2.97572	2.90837	4.28637	2.98249	3.14539	3.57968	4.01	3.27199	2.92495	3.25923	3.1151	3.8746	2.95207	2.83028	2.96548	4.57843	3.28434	3.0872	3.08222	3.24325	4.04025	3.521	2.82334	4.51379	4.98785	3.00046
Apool	4.06161	4.80633	4.49312	5.16025	4.95212	6.27066	4.77051	2.31378	5.61083	6.1449	5.30204	5.42073	4.28637	5.17573	5.0961	5.56091	4.80036	5.45027	4.67691	4.65335	4.49823	4.82457	4.34007	4.48494	5.10004	4.71044	5.649	4.95391	4.5489	5.5162	5.01674	5.473	5.3149	5.14271	5.43483	4.06658
Apopt1	5.83453	5.16653	5.59525	5.61538	5.11685	5.14132	5.22152	5.34761	5.19468	5.37372	5.19793	5.10719	4.77859	5.2726	5.21811	5.27172	5.39699	5.2892	5.27681	5.55433	5.27147	4.98883	5.33874	5.23545	5.30724	5.74553	6.00867	4.3035	5.30059	5.39699	5.36704	5.01965	5.38114	5.37743	5.77559	5.23891
App	7.02925	7.4163	6.86228	6.80913	7.21824	7.39794	7.67129	7.72457	7.28297	7.5543	7.75894	7.41109	7.22018	6.99745	7.59231	7.37346	7.20863	7.45883	6.88145	6.89126	6.94989	7.3158	6.95675	7.24183	7.34155	6.93458	6.08032	7.49955	7.45936	6.86474	7.38975	7.61926	7.18457	6.9753	7.30833	7.26026
Appbp2	5.23949	4.83335	5.56933	4.8979	5.5791	5.28923	4.1108	3.16087	5.27982	5.89724	5.30204	5.75465	6.01063	4.98878	4.87649	5.43947	5.68288	5.33119	5.42509	5.7341	5.65736	4.96272	5.96832	5.6758	5.71314	6.12257	5.74031	4.95391	6.2008	5.60853	5.86116	5.86761	6.04413	5.00929	5.55758	5.36683
Appbp2os	2.67406	2.23363	2.15159	0.543356	0	3.10781	0	5.03452	1.07944	1.26017	0	2.90837	0	0.70274	2.2086	1.9479	1.81498	2.33377	2.92495	2.50515	2.86212	2.74309	2.27817	2.02008	1.70942	3.34435	3.28434	2.24769	2.07076	2.38808	2.91756	2.58263	3.23507	0	4.03261	1.45976
Appl1	5.58779	5.43702	5.97675	5.57442	4.71561	5.28923	5.01357	4.07788	4.79271	5.04834	4.83116	4.70604	5.88714	5.01701	5.12134	5.4708	4.51269	4.84354	4.92483	5.26367	4.95237	5.11273	5.09641	5.41151	5.00123	6.02451	4.82382	4.5543	5.261	4.62017	4.97439	4.85528	5.19113	5.75626	4.98785	5.59297
Appl2	2.56893	1.37132	1.44445	3.34301	2.50602	0	2.24984	0	3.46192	3.4285	2.35611	3.6036	0	4.16551	2.54342	2.26629	3.57455	2.98692	2.53505	3.37214	2.16472	2.74309	2.1274	2.70065	2.25816	2.9759	2.69249	3.61443	4.41098	2.54586	2.91756	1.32025	1.92799	2.85626	3.11818	5.30429
Aprt	8.84778	8.95928	9.11502	8.46607	8.50862	8.20162	8.46798	7.8786	8.51184	8.55045	8.75101	8.66323	8.37326	8.3875	8.54259	8.59384	8.45565	8.59703	8.75101	8.96772	8.99923	8.81486	8.97862	8.5927	8.74084	8.17709	9.54155	7.9997	8.45964	8.21343	8.96627	9.03749	8.95047	8.30464	7.30833	8.23892
Aptx	4.09985	4.12099	4.18712	3.68833	3.61274	4.02161	3.61693	5.19954	4.14554	3.22827	3.40777	3.22759	1.86581	3.38044	4.1622	3.32923	3.93279	3.43488	3.8267	4.30074	4.08963	3.81747	4.03584	3.65685	4.31608	3.63759	3.81908	3.0872	4.08791	4.11549	4.36926	3.75229	4.36714	2.04288	3.11818	4.06658
Aqp1	3.10849	2.76961	1.44445	1.24615	4.15784	4.02161	4.1108	3.16087	2.44702	1.26017	2.35611	0.948355	0	3.76042	1.77182	0.562039	2.37784	1.44993	5.34223	4.60795	4.14749	2.31803	2.41466	1.50266	5.00123	6.07437	4.70795	4.95391	3.54476	4.25915	1.52258	0.9986	2.82334	3.75304	4.58789	4.06658
Aqp9	3.89763	3.83041	4.25373	2.88811	3.08557	4.02161	3.61693	3.16087	4.23354	4.70677	3.58332	3.22759	2.65294	3.29076	3.89582	3.69029	3.76476	3.89293	4.20049	4.97275	5.04662	2.61483	1.76835	2.02008	3.43802	3.34435	4.76705	4.7679	5.37667	4.87933	2.24674	3.80475	4.15635	5.26484	4.98785	4.06658
Aqr	3.85355	3.39539	4.04389	4.63126	4.30174	2.26614	3.8849	5.03452	3.72742	4.25838	4.75983	4.75653	3.15934	3.54462	3.70865	4.25561	4.01	4.32563	4.20049	4.46251	3.22668	3.9825	3.34273	4.36169	4.78066	2.47983	2.69249	5.26649	4.25847	4.78751	2.38249	3.24542	3.55501	4.0534	4.98785	3.00046
Araf	5.6916	4.60152	5.31236	5.1038	4.4938	4.97649	5.56461	4.84815	4.39492	5.16515	5.39913	5.59733	5.14492	5.22498	5.39411	5.0407	5.5599	5.2892	4.95303	5.23409	5.1912	5.2486	5.15605	5.21185	4.69895	4.71044	4.76705	5.74117	4.99746	4.90869	5.13681	4.95149	5.39724	5.26484	5.15271	4.94302
Arap1	5.9225	5.30811	5.34328	5.62877	6.26349	6.12073	5.44531	6.39932	5.76645	6.2007	5.08573	5.62477	6.01063	5.82923	5.91082	5.91992	5.77423	5.2892	5.69926	5.6244	5.41973	6.05512	5.72747	5.30402	6.12651	5.14313	4.64633	6.24763	5.76424	6.05168	5.22976	5.97452	6.06443	4.30188	6.65646	6.15026
Arap2	2.45554	2.23363	2.62404	3.05619	3.08557	2.26614	1.17127	0	2.11758	2.37454	1.24689	2.71766	0	2.25264	2.54342	3.63604	2.12369	3.64919	2.92495	2.50515	2.55516	2.31803	2.53935	2.70065	2.00972	2.47983	0	3.99972	3.99443	2.81751	2.09688	3.5824	2.09517	4.30188	0	4.34035
Arap3	6.04516	5.87439	6.63125	5.62877	5.26469	5.28923	5.01357	6.52908	5.57758	4.3599	5.39913	5.10719	6.66533	5.81322	5.69242	3.84176	5.18029	4.48289	6.60761	6.64384	6.08511	5.3528	5.97937	5.56841	5.51251	5.74553	5.44696	6.01651	5.44893	5.5162	5.73999	6.12652	6.18984	5.14271	6.35174	5.53967
Arcn1	6.10279	5.52252	5.4032	5.6552	5.43044	6.75074	5.56461	5.34761	5.5087	5.67888	6.03441	6.0049	5.75207	5.74733	5.67548	6.15988	6.4645	6.21566	5.27681	5.14155	5.65736	5.72314	5.80404	5.69295	5.38768	5.39934	5.85371	6.38341	6.17972	6.03846	5.86116	5.59717	5.54902	5.91391	5.96493	5.74198
Arel1	4.43508	4.28657	4.64974	4.2355	4.76611	3.63588	4.70277	4.63408	4.60748	4.14917	3.58332	4.70604	4.77859	4.74046	3.83609	4.48774	4.01	4.32563	4.743	4.3567	4.81628	4.79528	4.53238	5.51155	4.96673	4.57843	3.1127	4.5543	3.89446	4.0111	3.71971	4.08483	4.36714	2.04288	4.98785	4.76869
Arf1	7.80968	7.83592	7.74468	7.83194	7.71896	8.00166	7.89267	7.97285	7.88196	7.98606	8.01781	7.90084	7.97871	7.97029	8.03898	7.65836	7.8779	7.86469	7.52236	7.469	7.82052	7.85933	7.71353	7.6805	7.85682	7.61161	8.16656	7.49955	7.46808	7.57249	7.84537	7.93385	7.87797	7.67132	7.37662	7.67294
Arf2	3.89763	4.28657	4.91967	4.52062	5.71385	5.76408	4.47804	5.03452	4.60748	4.78186	4.60561	4.65372	4.77859	4.0609	4.00834	5.35804	4.34404	5.17857	4.45828	4.24252	4.81628	4.67178	4.70205	4.22691	3.53539	4.43313	5.0309	4.3035	4.41098	4.34754	4.30235	4.2068	3.30498	4.69852	5.30065	4.45993
Arf3	5.5189	5.30811	5.28077	5.45916	6.09591	5.86184	5.31524	4.63408	5.05673	6.68443	5.87476	6.02563	6.22983	5.66049	5.72572	5.78932	5.86014	5.56027	5.73217	5.8749	5.29726	5.69169	5.09641	5.58687	5.51251	4.94294	5.25388	4.95391	5.76424	5.97049	5.4773	5.87989	5.57755	5.48186	4.58789	5.59297
Arf4	7.73875	7.68462	7.75045	7.6435	7.35651	7.93583	7.39901	7.4245	7.56326	7.37189	7.40867	7.41895	7.9635	7.50079	7.26999	7.43829	7.34151	7.54163	7.72399	7.41071	7.60511	7.34641	7.71683	7.47282	7.55978	8.13072	8.30261	6.82625	7.20146	7.37634	7.90577	7.74205	7.56543	6.78429	6.86101	7.15787
Arf5	6.37641	6.658	6.86228	6.41973	6.72579	6.98575	6.87584	7.16979	6.21863	6.68443	6.94513	6.70312	6.70244	6.59087	6.72031	6.56745	6.81577	6.35446	6.91049	6.8431	6.99786	6.68567	6.65987	7.05552	6.97574	6.93458	7.87573	6.38341	6.55199	6.2015	6.64777	6.61194	6.93735	6.70019	6.54218	6.49637
Arf6	6.93191	7.12519	6.79677	6.6735	7.20914	6.89629	7.00802	6.58983	6.73817	7.38399	6.89607	6.90687	7.05784	7.22631	7.22413	6.75092	7.12433	6.83484	6.82153	6.63255	6.66297	6.70155	6.95675	7.12666	7.10825	6.93458	7.11582	6.31712	6.66249	6.93061	6.58582	6.81101	6.61836	6.9019	6.20921	6.49637
Arfgap1	4.31017	4.50398	4.18712	4.65764	3.61274	4.79038	4.70277	4.63408	4.23354	3.6043	4.00955	3.48882	4.77859	3.69201	3.83609	3.52102	3.67279	3.83575	4.37736	4.18185	4.08963	4.22146	4.59118	3.96985	4.01215	4.08951	5.0309	5.11865	4.48159	4.62017	3.9557	4.45676	4.03815	4.30188	4.98785	3.52404
Arfgap2	4.17342	4.50398	4.31741	3.78723	4.81491	5.5461	4.5569	2.31378	5.15014	3.76098	3.73981	4.54301	5.52232	4.63509	4.61734	3.97883	5.04008	4.48289	4.5349	3.83307	4.20313	4.90903	4.61971	4.63444	4.81985	3.88117	5.0309	4.3035	4.61321	4.30402	4.43319	4.52088	4.23009	4.0534	4.03261	4.45993
Arfgap3	3.25124	2.9777	3.50201	3.46753	3.23648	0	3.46163	2.31378	3.30827	4.14917	4.1276	3.48882	3.53343	3.19514	3.95318	3.32923	3.46913	2.75983	3.32084	2.69078	2.99415	3.81747	3.94858	3.58519	4.31608	3.63759	3.28434	3.61443	3.78704	3.95593	3.08614	3.95158	3.16159	4.51379	3.11818	3.00046
Arfgef1	6.87792	6.47277	6.19587	6.54514	6.47563	5.6592	5.80973	5.92072	5.76645	5.71764	5.4901	5.48203	5.67948	5.98029	6.57257	5.65938	5.33832	5.89018	6.09051	6.13703	6.42635	6.48932	6.3208	6.59933	6.38348	6.49629	5.33424	5.74117	5.51775	5.37613	6.19204	6.65544	6.28806	6.12215	5.15271	5.23891
Arfgef2	4.17342	4.12099	4.25373	4.82993	3.99798	3.63588	3.8849	3.69104	3.84384	3.76098	3.20786	3.36411	4.46974	4.56031	3.89582	3.74257	2.59385	3.7762	3.76442	4.3567	3.90065	4.53671	4.11812	3.65685	4.65629	2.9759	0	3.99972	4.25847	4.30402	4.46413	4.95149	4.49229	3.75304	3.11818	4.85848
Arfip1	5.57428	4.96136	5.51605	4.65764	3.81818	2.26614	3.8849	4.63408	4.6719	5.63904	4.96405	4.75653	5.14492	5.04471	4.90584	5.35804	4.66368	5.64593	5.44508	5.42941	4.62585	4.67178	4.37395	4.83312	5.16234	4.83137	5.61723	5.93044	5.61518	5.74497	4.90844	5.20673	5.13465	5.00929	6.05104	5.74198
Arfip2	2.67406	3.59806	3.38801	3.05619	1.92915	2.26614	3.75713	3.69104	3.13628	3.22827	3.40777	2.23839	4.07625	3.88821	3.24061	3.57968	3.46913	3.58123	2.20069	2.50515	2.99415	3.81747	3.64983	3.50978	3.33359	4.27152	3.43772	0	2.88794	3.77651	3.91149	3.08499	3.8638	4.51379	3.11818	3.00046
Arfrp1	5.47593	5.78032	5.69451	5.50347	4.9951	4.97649	6.3198	4.84815	5.5087	5.22018	5.08573	5.7296	4.28637	6.07735	5.51332	5.01967	5.58535	5.33119	6.03883	5.64701	5.87851	5.46865	6.09562	5.85407	5.85193	5.23368	5.82618	5.74117	5.58343	5.67837	5.66208	5.44021	6.09436	6.05602	5.15271	5.17043
Arg2	5.72868	5.34613	5.37355	2.59238	3.99798	4.32566	1.17127	2.31378	4.23354	5.16515	4.52185	4.14845	4.07625	3.76042	4.30122	4.60534	4.61509	4.95515	6.25808	6.66616	6.26579	4.34788	5.0342	3.96985	5.30724	5.54792	6.92142	6.5075	5.8198	6.46127	5.01674	6.09527	5.89342	5.83724	5.55758	6.03943
Arglu1	7.26206	7.29519	7.28487	7.368	7.13422	6.84938	7.02199	7.12944	7.23046	6.77911	6.75645	6.98306	6.37481	6.89466	7.14634	7.14491	6.90943	7.04495	6.78278	6.85286	7.16828	6.44286	6.84642	7.07527	6.38348	6.87955	5.3728	7.04683	7.44176	7.09284	7.00939	6.8552	6.58362	7.53231	7.87853	7.51622
Arhgap1	5.95416	6.0914	5.83166	6.02304	5.86052	6.84938	6.62445	6.81008	6.66092	6.33143	6.58131	6.58235	5.52232	6.47351	6.777	6.15988	6.22646	6.06208	5.94367	6.10471	6.17132	6.34518	5.88851	6.34108	6.45989	5.74553	5.98397	5.74117	6.26226	5.88447	6.08664	6.32815	6.14289	4.69852	5.67069	6.15026
Arhgap10	3.03144	2.65311	4.37839	3.40661	1.52216	0	2.24984	0	1.68994	2.7183	3.58332	3.22759	3.83022	3.09273	3.14539	1.2804	2.37784	1.72651	2.53505	3.37214	2.71679	3.41705	1.76835	3.50978	1.32971	1.71772	2.42531	2.24769	1.64803	2.21091	3.71971	3.521	3.00236	2.85626	3.64666	1.45976
Arhgap11a	5.9225	6.12459	5.21542	6.66052	6.2279	5.28923	5.44531	6.09849	5.57758	5.42146	5.14292	6.33899	5.24892	5.66049	5.45495	5.94244	5.92138	5.89018	5.69926	5.83606	5.7349	6.16226	5.90019	6.47597	5.51251	5.74553	4.2912	6.5075	5.37667	5.497	5.68852	5.53642	5.38114	5.48186	5.15271	6.34924
Arhgap12	2.95005	1.86596	2.97936	2.47861	2.24623	0	3.8849	3.16087	3.84384	3.22827	2.69893	2.49783	0	3.29076	1.49115	2.84651	3.23192	3.35573	2.20069	2.85522	2.37311	1.94392	2.85942	0	2.81846	0	0	2.24769	3.25341	2.81751	2.82526	1.80535	2.24498	3.37323	3.11818	3.52404
Arhgap15	7.32798	7.17358	7.51276	7.41515	6.50567	6.94171	6.73032	7.08792	6.6767	6.40453	6.82795	5.82732	6.62724	7.15821	6.63524	6.73165	6.4645	6.31316	7.47453	7.46264	7.24318	7.26328	7.3248	7.02876	6.65668	6.87955	7.05784	6.56576	6.30182	6.1896	7.07098	6.69071	7.34668	6.46563	6.76236	6.88621
Arhgap17	5.6276	5.58745	5.71829	6.12109	6.31529	6.8009	6.69588	6.81008	6.10656	6.47411	6.42868	6.41954	6.06863	6.63709	6.35574	6.7381	6.51834	6.72889	4.98068	5.37625	5.48851	5.84249	5.61861	5.97114	6.28891	5.97286	5.29462	6.62176	6.67761	5.76116	5.57973	5.56711	5.68634	6.51569	6.90791	6.37989
Arhgap18	4.8484	4.91151	4.69838	6.20399	5.26469	5.42337	4.70277	4.84815	5.64332	5.32433	5.90813	4.8982	4.07625	5.82923	5.35208	5.64571	5.30807	5.57781	5.44508	5.6244	4.78015	5.20471	5.3558	5.36947	5.03492	5.47554	3.57635	6.17463	6.17972	5.85461	5.38332	5.12656	5.17254	5.83724	5.87336	6.11426
Arhgap19	6.18513	6.33775	6.65609	6.92769	6.49073	6.27066	6.36433	6.39932	6.24004	5.71764	5.76973	5.56936	6.80837	6.16828	6.25671	5.65938	5.83914	5.72679	6.53486	5.93128	6.91699	7.01277	6.55299	6.85684	6.1108	5.74553	5.93327	3.0872	6.15833	5.92812	6.31593	6.51293	6.22634	4.30188	6.41805	5.694
Arhgap21	2.95005	3.983	2.81261	3.73863	3.99798	3.10781	3.46163	2.31378	3.30827	3.4285	3.20786	3.98866	3.15934	1.81162	3.32994	3.02597	3.67279	3.7762	3.32084	2.85522	1.62774	4.03356	3.59342	3.85267	3.33359	3.34435	0	2.24769	3.67098	3.64316	3.00431	3.16744	3.23507	4.30188	4.03261	3.28587
Arhgap22	1.69714	1.63974	2.15159	1.24615	1.52216	0	2.58698	2.31378	2.11758	2.37454	1.24689	0	0	2.25264	1.49115	0.965476	1.42171	0.657472	2.53505	0.831486	2.16472	0.650307	1.95901	2.02008	1.32971	0	2.42531	0	0	1.14397	1.92963	0.9986	1.26461	2.85626	3.11818	2.64429
Arhgap23	4.09985	3.53362	4.04389	3.87978	4.08013	5.28923	3.8849	3.16087	2.94098	2.9957	3.73981	3.36411	3.83022	3.82573	3.14539	2.84651	3.57455	3.27199	3.8864	3.83307	3.96643	4.30696	3.4096	4.27325	3.22101	4.08951	0	5.63633	3.25341	4.72289	3.6675	4.12664	3.90941	3.75304	4.03261	3.28587
Arhgap24	3.10849	2.23363	3.7061	0.543356	3.23648	4.02161	0	3.16087	3.72742	2.7183	1.90558	2.49783	1.86581	2.43113	3.14539	3.02597	3.23192	2.98692	3.8267	2.85522	2.55516	2.61483	2.65411	1.78444	2.96548	1.71772	3.57635	2.24769	2.39728	3.71137	3.55705	3.24542	2.82334	3.37323	4.03261	3.7284
Arhgap25	6.72116	5.9627	6.60598	5.8161	6.1914	5.9534	5.40324	6.75809	6.10656	5.96325	5.61663	6.06623	5.95021	6.53338	6.3873	6.00798	6.19374	5.87607	7.08626	7.21265	6.89182	6.37518	6.7335	6.21618	5.79408	6.70061	5.82618	7.2735	6.46754	6.35865	6.19204	7.00845	6.82285	6.61089	7.44183	6.94888
Arhgap26	5.01775	5.24912	4.96013	4.8979	4.23158	4.79038	5.48618	3.69104	5.32058	5.46768	5.25092	5.18299	5.52232	4.83865	4.54457	5.56091	5.07643	4.78432	4.92483	4.74007	3.83172	4.85328	4.43943	4.48494	4.42174	3.34435	2.91784	4.5543	6.17972	4.93745	4.6903	5.1058	4.19369	4.30188	2.27544	5.59297
Arhgap27	4.89264	4.83335	4.64974	5.00452	5.15526	3.63588	4.63168	4.07788	5.27982	4.70677	5.25092	5.42073	4.63242	4.52141	4.9346	4.48774	4.71069	4.90042	4.86673	4.46251	5.01588	5.08878	4.59118	5.45236	4.2602	4.57843	2.42531	4.7679	5.48375	4.75556	4.52408	5.08474	4.78919	4.69852	4.98785	5.02287
Arhgap27os3	3.03144	1.86596	2.62404	2.21998	2.7261	0	2.24984	0	2.11758	1.92238	2.35611	2.49783	4.07625	2.73299	2.93373	2.74766	1.81498	1.44993	2.92495	1.73922	2.37311	0	2.1274	2.40013	1.32971	1.71772	2.69249	0	2.66337	2.81751	2.09688	2.16775	0.952392	0	2.27544	1.45976
Arhgap30	8.34154	8.23594	8.20227	7.66317	7.45216	7.43017	7.42026	8.35179	7.89552	8.27309	7.89	7.47279	8.40737	7.91884	7.78232	7.84926	7.45631	7.54609	7.99541	8.19633	8.05024	7.44872	7.32913	7.81188	7.76945	7.27029	6.75622	7.91259	7.62448	7.69968	7.78539	8.11615	7.82541	8.02245	8.37228	8.03257
Arhgap31	2.95005	2.76961	2.81261	3.63622	3.61274	2.26614	0	0	2.94098	3.4285	3.58332	3.22759	3.83022	2.98249	1.77182	3.52102	3.23192	4.05203	2.67705	0.831486	2.37311	2.14307	2.53935	2.83028	2.96548	1.71772	1.06547	3.61443	3.54476	3.49621	3.16357	2.69807	1.26461	0	2.27544	3.90738
Arhgap33	0.534577	1.04127	2.15159	1.50051	0	0	2.58698	0	0	2.37454	0	0.948355	0	1.81162	2.68558	0.965476	3.23192	0.657472	1.9991	0	2.16472	1.09694	2.85942	1.78444	0.81292	0	0	0	0	1.49305	1.26591	1.80535	2.24498	2.04288	0	1.45976
Arhgap35	2.33247	1.37132	2.62404	2.59238	2.50602	3.10781	2.86007	0	0	2.7183	1.24689	1.92182	1.86581	2.25264	2.00668	3.25918	1.81498	3.7762	2.53505	3.00282	2.71679	1.94392	3.1989	2.83028	2.25816	3.88117	1.67162	4.3035	3.78704	3.04603	2.62079	3.16744	3.00236	3.75304	2.27544	2.64429
Arhgap39	3.25124	3.32097	2.62404	2.69784	2.50602	4.02161	2.86007	0	2.71503	1.26017	1.90558	2.90837	3.15934	2.98249	3.04344	1.9479	2.7817	2.49019	2.80632	2.85522	1.25914	3.63111	2.41466	2.94923	0.81292	2.47983	0	2.24769	2.88794	2.81751	1.92963	2.31969	0.952392	4.30188	4.58789	3.52404
Arhgap4	6.5795	6.27014	6.64373	6.74291	6.09591	7.02848	6.22639	6.75809	6.52801	6.33143	5.94075	6.27115	6.50654	6.48366	6.80063	5.65938	6.49167	5.6292	6.79062	7.18973	6.35446	6.45227	7.14514	6.62636	6.64582	5.9193	6.31625	7.12641	6.06943	5.99807	6.76421	6.9745	6.71141	6.41377	6.86101	5.02287
Arhgap5	2.77204	3.15952	2.40707	2.88811	2.24623	3.63588	2.58698	4.07788	2.44702	3.4285	1.24689	2.90837	3.53343	2.98249	3.49353	3.57968	3.46913	3.89293	3.03456	2.29207	2.55516	2.31803	2.76042	2.70065	2.25816	3.88117	2.42531	2.24769	3.78704	3.41672	2.82526	1.5831	1.92799	3.75304	4.80168	4.06658
Arhgap6	2.0495	2.23363	3.26422	1.90464	2.24623	0	1.80908	0	0	1.26017	1.24689	0	2.65294	0.70274	1.49115	1.53874	2.59385	1.9585	2.92495	1.73922	1.92107	1.09694	0	2.22258	0.81292	3.88117	2.09713	0	3.54476	1.7739	1.74041	1.80535	0	2.85626	0	1.45976
Arhgap9	7.57194	7.60845	7.77334	7.48311	7.5847	8.02295	7.50225	7.97285	7.94849	7.30981	7.83032	7.82598	8.12255	7.95577	8.06197	7.39404	7.50379	7.27208	8.01561	8.21537	7.80263	7.67463	7.97044	7.5827	7.69764	7.92868	8.67081	7.79574	7.34092	7.014	7.9142	8.07135	8.0859	7.55643	7.7557	7.38638
Arhgdia	7.81831	7.93904	7.73887	8.3085	8.53798	8.51883	8.60418	8.51732	8.5931	8.71756	8.70428	8.64659	8.47327	8.65791	8.39775	8.72955	8.97691	8.93149	7.73215	7.49417	7.90683	8.33181	7.7267	8.12781	8.49371	8.29745	7.53677	8.35395	9.00928	8.77004	7.94742	8.0606	7.93696	8.45333	8.65947	8.73014
Arhgdib	12.8249	12.8623	12.9441	12.262	12.3891	12.411	11.9896	12.3007	12.4568	12.0069	12.0823	12.2734	12.8917	12.5127	12.7178	11.9468	12.1893	12.0369	12.7928	12.8009	12.8798	12.6835	12.7612	12.606	12.7137	12.2739	13.0649	11.9168	11.6639	11.8726	12.7776	12.9287	13.0117	11.4988	11.6321	11.6428
Arhgef1	6.7515	6.53993	7.05204	7.00678	7.15332	7.36497	6.56845	7.08792	6.97362	6.66473	6.47396	6.74123	6.9994	7.01855	6.92051	6.3488	6.83712	6.56263	6.65987	7.0354	6.91699	6.9072	6.82208	6.62636	6.61273	7.18207	5.25388	7.30804	7.07015	6.52899	6.77659	7.02513	7.01762	6.24595	6.60045	6.37989
Arhgef10l	3.55636	2.8774	3.7061	4.4008	4.08013	5.6592	3.28757	4.63408	3.95157	5.10793	4.68478	4.98546	3.83022	4.86995	3.89582	4.95468	5.21331	4.84354	2.67705	2.29207	3.60267	3.69594	3.12122	2.40013	4.31608	5.0465	1.67162	3.0872	4.8977	3.41672	2.50656	3.45689	2.50472	5.57924	4.3368	5.23891
Arhgef11	3.44193	2.65311	3.38801	3.87978	3.08557	4.79038	3.61693	2.31378	3.46192	3.4285	2.97572	3.36411	1.86581	3.54462	3.70865	3.10797	3.85122	2.87784	2.37754	2.29207	2.55516	3.25437	3.4096	4.22691	4.01215	1.71772	2.09713	0	3.54476	3.41672	3.55705	3.80475	4.03815	4.0534	3.64666	3.28587
Arhgef12	1.69714	2.38741	1.44445	2.9746	2.24623	3.63588	3.0896	2.31378	2.44702	1.26017	3.20786	1.51568	2.65294	1.52746	3.24061	2.93903	2.7817	2.1583	3.32084	2.04197	3.68313	1.09694	1.95901	0	1.70942	4.08951	0	2.24769	2.39728	3.24325	1.92963	0.9986	2.38069	4.51379	4.03261	3.00046
Arhgef18	5.05716	5.20842	5.07511	5.44408	5.90628	5.14132	4.63168	5.03452	4.46931	5.2732	4.68478	5.21945	5.67948	5.07188	5.3306	4.21918	3.76476	4.40641	4.83678	5.55433	5.07672	4.76538	5.05524	5.16347	5.36136	5.39934	2.91784	6.17463	4.8977	4.16498	4.43319	5.22609	4.76459	4.69852	5.87336	5.09854
Arhgef2	6.00542	6.20955	6.10858	6.21291	6.41362	5.42337	5.56461	5.48189	5.7062	5.96325	5.65646	5.85075	4.91131	6.16828	5.30879	5.19875	5.53399	5.6292	5.66557	5.6244	6.29169	5.88482	5.92326	6.30807	5.46387	5.14313	5.5175	6.38341	5.9747	5.77716	6.02574	6.01961	5.77524	6.18538	5.87336	6.43931
Arhgef3	6.49593	6.12459	6.26209	6.23935	5.76442	6.53058	6.17731	7.12944	6.5105	6.45129	5.90813	5.48203	6.01063	6.44261	6.53549	6.17898	6.27418	5.72679	6.33509	6.83327	6.34212	6.38505	7.0062	6.53422	6.35709	6.25819	6.10344	7.04683	6.3592	6.24818	6.00485	6.53639	6.23532	6.41377	6.99738	6.00051
Arhgef37	2.33247	3.46616	0.895917	3.34301	3.61274	4.79038	3.28757	2.31378	3.30827	3.76098	2.35611	3.36411	3.53343	3.54462	3.24061	3.39603	2.7817	2.87784	2.92495	2.85522	2.71679	2.96975	2.53935	1.78444	2.25816	2.47983	1.06547	0	2.39728	2.54586	3.43743	0.584029	2.09517	2.04288	0	2.17033
Arhgef39	4.60424	5.28871	4.31741	5.60185	4.90781	4.32566	4.63168	3.16087	4.90418	2.37454	3.88097	3.6036	4.63242	4.56031	4.99047	3.25918	3.93279	4.59052	5.40481	4.82187	5.01588	5.03967	5.05524	5.36947	4.07827	5.0465	4.20834	4.7679	4.33674	4.21283	4.76674	4.83019	4.60745	2.04288	4.03261	3.7284
Arhgef4	3.38113	2.9777	3.60766	3.40661	3.91088	2.26614	3.0896	2.31378	3.72742	0	4.33815	3.36411	3.15934	3.38044	3.49353	2.4025	3.23192	2.33377	4.24678	4.65335	3.51745	3.9825	3.03912	4.17903	3.43802	4.27152	3.81908	5.11865	3.08222	2.68807	3.61333	3.80475	4.49229	3.37323	4.3368	1.45976
Arhgef40	1.22993	1.04127	1.44445	2.07091	0.953156	0	0	2.31378	0	1.26017	0	0	0	1.52746	2.2086	0.562039	2.59385	1.72651	2.20069	0	3.33026	2.96975	1.95901	1.78444	0	4.57843	0	3.61443	1.64803	2.93629	2.38249	1.32025	0	4.0534	0	3.90738
Arhgef6	5.70407	5.75227	5.64573	6.60737	5.9723	5.76408	5.35991	5.60473	5.7062	5.93063	5.57568	5.6517	5.88714	6.03655	5.83656	6.03967	5.88085	5.9317	5.90089	5.14155	5.61696	5.67571	5.61861	5.92835	6.02956	4.27152	5.95884	5.74117	5.92489	5.66122	5.43107	5.72517	5.85897	5.00929	5.87336	6.25318
Arhgef7	4.87069	5.34613	5.03779	5.12286	4.95212	4.32566	4.77051	4.63408	5.19468	5.22018	5.44533	5.255	5.24892	5.50967	4.87649	5.30687	5.04008	5.33119	5.03445	4.69736	5.27147	5.06443	4.50206	4.92307	5.69218	4.27152	3.70281	6.01651	5.44893	5.76116	4.63699	4.75219	4.95059	5.75626	4.58789	5.64437
Arid1a	6.7575	6.42916	6.54078	6.86114	6.96076	5.6592	6.12651	6.64813	6.6767	6.56195	5.84059	6.49583	6.50654	6.36784	6.71202	6.43074	6.63261	6.48106	6.34576	6.43874	5.91228	6.17368	6.00121	5.98513	6.2026	7.18207	4.64633	7.2735	6.58444	6.31547	5.97294	6.54412	6.10419	6.30409	6.99738	6.52408
Arid1b	5.25652	5.82139	5.54294	5.76848	5.92862	5.14132	5.12129	5.48189	5.43637	5.37372	5.61663	4.75653	5.14492	5.54888	5.45495	5.30687	4.92519	5.48787	5.57776	4.86109	5.39605	5.65954	5.23193	5.64088	5.38768	4.94294	4.12042	5.63633	5.51775	5.57231	5.87274	5.30105	5.26315	5.67046	5.96493	5.42677
Arid2	6.38417	5.34613	6.30983	6.0729	5.68789	4.97649	6.25031	5.82288	5.64332	5.22018	5.84059	5.32359	5.52232	5.74733	6.03556	5.56091	5.53399	5.80336	6.11567	5.64701	5.1912	5.73861	5.81641	6.0263	5.55957	5.0465	4.64633	4.7679	5.76424	5.497	5.66208	6.06333	5.47512	5.26484	5.77559	5.48433
Arid3a	6.97884	6.88159	7.57269	6.74291	6.75109	6.89629	6.12651	6.09849	6.34255	6.28055	5.87476	5.7041	6.37481	6.60954	6.71202	6.12091	6.28975	5.91799	7.13631	6.9741	6.79556	6.98709	7.14023	6.90913	6.94948	6.98759	5.41036	7.16461	5.8733	6.31547	6.7328	7.10051	6.56236	5.91391	6.60045	6.94888
Arid3b	5.4904	4.56973	5.34328	3.52598	4.60896	4.02161	3.46163	5.19954	5.15014	3.6043	3.88097	3.22759	5.14492	3.69201	4.11272	3.32923	4.01	4.28349	5.18469	4.97275	5.27147	4.88142	4.67512	4.70375	3.94284	2.47983	2.91784	3.61443	4.17571	4.21283	5.33392	5.55185	5.38114	4.69852	4.3368	1.45976
Arid4a	7.13431	7.32405	7.47137	7.28158	6.82442	6.94171	6.52987	6.75809	7.28297	7.09105	5.97265	6.25368	6.73862	7.33685	6.90606	7.0181	6.49167	6.72889	7.28235	7.54924	6.68267	6.04271	6.7335	6.72134	6.94062	6.76276	5.41036	7.86698	7.05865	6.73965	6.34945	6.9745	6.90956	7.17543	7.53442	7.4014
Arid4b	6.80457	6.32829	6.69257	6.28237	6.01469	3.10781	5.52593	5.71793	6.08307	6.30621	5.90813	5.3567	6.50654	5.87623	6.10046	5.83819	5.68288	5.86181	6.38769	6.65504	6.34212	5.76906	5.82868	6.15562	5.75418	6.70061	4.76705	6.91857	6.09217	5.76116	6.07667	5.96303	6.1524	6.30409	6.48145	6.62987
Arid5a	4.80276	4.93665	4.4369	4.8756	4.86211	5.28923	4.89716	3.69104	5.19468	5.42146	4.1276	5.14559	4.28637	5.5294	5.58765	4.97667	5.27717	4.36658	4.60765	5.10933	4.30834	4.67178	4.19596	4.70375	4.78066	3.34435	3.28434	5.63633	5.41325	4.68945	4.76674	5.61197	5.15372	6.18538	4.3368	5.30429
Arid5b	5.71643	4.98565	4.54724	5.38215	5.63452	5.9534	4.83522	5.34761	5.79565	5.86307	5.69521	5.10719	5.24892	5.15046	5.24132	5.64571	5.30807	5.78837	5.32075	5.23409	4.62585	4.60582	4.23336	5.25867	5.43892	4.94294	4.2912	5.26649	3.89446	4.16498	4.83933	4.90418	5.07586	4.69852	5.15271	4.57036
Arih1	6.43741	6.21983	6.3254	5.8622	5.33329	5.14132	5.56461	6.01234	5.10419	6.05694	5.87476	5.3567	5.67948	5.50967	5.79009	5.80169	5.83914	5.75791	6.0649	5.98553	5.59633	5.44998	6.11579	5.92835	5.8329	5.74553	6.14858	6.01651	5.67666	5.60853	5.67537	6.32815	6.07447	6.30409	6.48145	5.91938
Arih2	4.97724	5.14512	5.1816	5.08448	5.36641	4.57665	4.47804	2.31378	4.6719	4.98619	5.65646	5.02719	4.46974	4.98878	4.68662	4.54774	5.1465	5.24596	4.98068	4.93648	5.44302	4.98883	5.45411	4.59849	5.03492	5.14313	4.20834	4.5543	3.99443	5.1242	4.86273	4.90418	5.13465	5.67046	5.15271	4.85848
Arl1	5.82314	5.73804	6.65609	5.75632	5.5791	5.6592	6.22639	4.63408	6.45666	6.54049	6.20525	6.25368	5.43682	6.25382	5.56942	6.00798	5.79619	6.04956	5.76435	6.19958	6.11442	5.78405	6.14552	5.28152	6.12651	5.97286	6.69667	5.11865	5.76424	6.07775	6.36593	6.32815	6.04413	5.91391	5.43483	6.07733
Arl10	1.88405	3.07147	3.12881	3.73863	2.917	3.10781	1.80908	2.31378	3.60077	4.03101	3.58332	3.36411	2.65294	3.09273	2.93373	2.93903	3.46913	3.83575	1.9991	2.04197	1.92107	2.47405	2.53935	2.40013	3.0989	1.71772	3.57635	3.0872	3.08222	2.68807	2.50656	2.31969	3.08417	3.37323	3.11818	3.7284
Arl11	7.04893	6.8751	7.27689	6.48748	6.96076	6.75074	6.25031	6.95568	7.02385	6.08686	6.64208	6.65069	6.22983	6.80033	7.08351	6.31467	6.54453	6.25981	7.1906	7.58482	7.02127	6.94103	6.87629	6.99459	7.04352	6.96133	7.91545	6.72762	6.26226	6.31547	6.39833	7.03064	7.05868	6.35997	6.05104	6.11426
Arl13b	3.76112	3.53362	4.49312	3.68833	3.81818	0	3.0896	0	2.44702	1.92238	2.69893	4.4843	4.28637	3.46486	3.64045	3.88892	3.46913	3.50991	2.37754	3.13671	4.02934	3.56322	3.47351	2.94923	4.07827	4.43313	2.91784	3.99972	4.25847	3.41672	2.91756	3.16744	2.24498	3.37323	0	3.52404
Arl14ep	4.17342	4.12099	4.11728	4.4317	2.917	4.02161	3.61693	4.63408	3.72742	2.37454	4.68478	4.14845	4.07625	4.74046	3.83609	4.3597	4.21954	3.94794	3.48433	4.11851	2.99415	4.30696	3.59342	3.65685	3.53539	4.71044	4.20834	0	3.25341	3.77651	4.33619	3.521	4.23009	3.37323	3.64666	2.17033
Arl15	2.56893	2.38741	1.84092	1.90464	1.92915	0	3.0896	5.03452	3.95157	2.9957	3.20786	3.48882	3.83022	2.58994	2.93373	2.84651	3.46913	2.1583	2.20069	1.73922	3.68313	3.16559	3.70412	3.05911	3.0989	1.71772	2.09713	2.24769	2.66337	2.93629	3.61333	1.80535	3.55501	0	3.11818	0
Arl16	4.27718	4.28657	3.96657	3.68833	3.49789	4.32566	3.8849	2.31378	3.30827	2.7183	3.73981	4.70604	3.15934	2.98249	2.81498	3.79302	3.93279	4.05203	3.69933	3.37214	3.75934	3.92956	4.15756	3.96985	3.43802	3.34435	4.58195	3.0872	3.89446	4.34754	3.71971	4.52088	3.95361	0	3.64666	3.7284
Arl2	3.98195	2.8774	3.38801	3.83425	3.91088	2.26614	4.21174	0	4.05181	3.9023	4.23671	3.22759	3.15934	4.11415	3.64045	3.97883	4.40247	4.05203	3.76442	3.57449	3.51745	4.30696	3.85571	4.70375	3.33359	3.88117	3.57635	5.63633	4.33674	4.72289	4.12012	4.08483	3.76803	4.30188	3.11818	3.7284
Arl2bp	6.19399	6.39329	5.76472	5.47408	5.76442	5.76408	6.3198	6.64813	6.12969	5.96325	6.00386	6.08611	6.66533	6.25382	6.88411	5.94244	5.68288	6.15851	6.01227	5.98553	6.40278	5.96593	5.7143	5.85407	6.62384	5.86367	6.99742	6.09774	6.15833	5.89917	6.54299	6.8552	6.71141	5.37743	6.20921	5.78842
Arl3	5.01775	5.00954	5.24846	4.0881	4.4938	4.32566	5.06844	5.34761	4.46931	4.62755	5.3514	4.22217	3.83022	4.56031	4.99047	4.83938	4.71069	4.90042	4.98068	4.56108	5.44302	4.82457	4.64768	4.83312	5.2794	5.68262	5.5175	4.7679	4.67477	5.33347	5.13681	5.01965	5.13465	4.30188	5.55758	4.94302
Arl4a	4.65649	4.36274	4.31741	5.02493	4.90781	4.32566	5.26914	3.69104	5.47299	3.22827	4.60561	4.4843	4.07625	4.80666	4.11272	4.104	3.76476	3.64919	4.71033	4.97275	4.62585	3.75799	4.37395	3.72512	4.74039	4.43313	5.33424	5.63633	4.5489	5.89917	3.6675	4.08483	4.26559	5.83724	4.3368	5.02287
Arl4c	5.53295	5.73804	6.09047	6.14926	6.78822	6.27066	6.52987	6.58983	7.14226	6.4281	6.42868	6.23599	6.06863	7.01155	6.3873	6.28853	6.47815	6.22683	5.87164	5.04265	5.69665	4.93612	5.54616	5.47236	5.77427	5.74553	4.64633	6.67566	6.55199	6.57548	4.83933	5.473	5.56335	6.24595	6.76236	6.43931
Arl5a	4.31017	4.12099	3.7061	3.96675	3.81818	4.32566	4.83522	4.38262	3.13628	4.03101	4.33815	4.07077	4.91131	3.9481	4.30122	4.06348	4.45864	4.00092	3.48433	4.05227	3.22668	3.25437	3.47351	3.85267	3.62661	3.34435	3.92668	3.99972	4.33674	3.57156	3.55705	2.99755	3.49644	3.37323	3.11818	3.90738
Arl5b	3.89763	3.59806	2.15159	3.27647	3.49789	2.26614	3.61693	2.31378	2.11758	2.9957	3.20786	3.07679	2.65294	3.6202	4.38698	2.84651	2.7817	2.98692	3.48433	3.75192	4.02934	3.41705	2.95207	3.05911	4.31608	1.71772	3.43772	2.24769	1.64803	1.49305	2.82526	3.99737	3.08417	2.04288	3.11818	3.28587
Arl5c	4.09985	4.20615	4.69838	5.24968	6.33215	6.53058	6.01919	6.17978	5.82428	4.78186	4.52185	4.54301	5.82118	5.89157	5.55096	5.10202	4.92519	4.32563	4.57173	3.83307	4.40641	4.85328	4.53238	4.17903	5.25101	4.08951	5.68008	4.7679	2.88794	4.43083	4.2677	4.2068	3.4354	4.86225	4.03261	4.67293
Arl6	1.22993	1.04127	0.895917	1.24615	1.52216	2.26614	2.58698	0	0	2.37454	3.58332	1.92182	0	2.98249	2.2086	2.11586	1.81498	2.49019	2.37754	1.3556	0.762784	1.4375	1.76835	0.688148	1.32971	2.47983	2.91784	0	3.78704	2.81751	2.50656	2.80495	2.61893	3.75304	0	1.45976
Arl6ip1	9.11846	9.31728	9.06488	9.52082	9.4304	9.09244	9.15026	9.14212	9.21516	9.22439	9.08601	9.2569	9.31827	9.08711	9.35761	9.13235	9.04039	9.03515	8.98065	8.98336	9.28518	9.31028	9.28168	9.51693	9.33992	9.1746	9.84048	8.49556	8.96684	9.11196	9.35777	9.38737	9.2071	9.06241	8.61775	8.83894
Arl6ip4	5.70407	6.08016	6.19587	5.89583	6.5922	6.03949	6.49023	5.92072	5.82428	6.5831	6.28364	6.70312	5.03284	6.21778	6.42833	6.65188	6.09088	6.51788	5.63109	5.91273	6.00911	5.92594	6.06484	5.98513	5.77427	6.79285	5.95884	6.5075	6.69257	6.27096	5.97294	5.98593	5.79966	5.91391	5.87336	7.00895
Arl6ip5	4.93556	5.95041	5.11149	4.65764	5.19267	5.9534	5.84158	5.03452	5.00765	5.96325	5.3514	5.67814	5.82118	5.4279	5.01761	5.2357	5.45336	5.33119	5.18469	5.2039	5.07672	4.93612	4.67512	4.83312	5.33456	5.74553	5.71051	4.95391	4.94844	5.04711	5.52209	4.69775	4.81338	5.14271	3.11818	4.45993
Arl6ip6	5.18717	5.30811	5.62071	4.98382	4.60896	5.5461	4.5569	5.19954	4.39492	3.76098	4.68478	4.4843	4.91131	4.86995	4.81593	4.74002	5.21331	4.75378	4.86673	4.74007	5.29726	5.29118	4.67512	4.92307	4.89516	5.31889	5.61723	4.95391	4.5489	4.50957	4.81553	4.35489	5.11532	4.86225	3.64666	4.34035
Arl8a	5.97488	5.38317	5.89564	4.91986	5.22913	5.6592	5.44531	4.07788	5.3988	4.98619	5.30204	5.28971	5.67948	6.09069	4.54457	5.01967	5.53399	5.39196	4.6427	5.7341	5.39605	5.29118	5.77896	5.6051	5.1925	5.23368	4.44389	4.7679	4.8977	5.24419	4.90844	5.72517	5.22759	4.69852	5.30065	5.30429
Arl8b	5.91179	5.92551	4.87805	5.89583	5.19267	6.03949	6.36433	5.92072	5.7062	5.79219	5.73295	5.91884	5.03284	5.74733	5.93949	6.28853	5.48074	5.98528	5.50344	5.23409	5.75365	6.25123	5.96832	5.94275	6.02956	6.07437	6.08032	6.17463	5.64625	5.53515	6.20125	6.16716	6.24425	5.57924	5.43483	5.694
Armc1	5.53295	4.88592	5.51605	5.31743	5.36641	5.9534	5.17228	5.34761	5.27982	5.42146	4.89914	5.32359	5.43682	5.34121	5.21811	5.37469	5.65911	5.66247	5.11153	5.26367	5.55417	5.06443	5.21333	5.58687	5.73381	6.25819	5.88072	6.17463	5.30059	5.31167	5.60771	5.52082	5.83554	5.00929	4.80168	5.17043
Armc10	4.43508	5.03304	4.31741	4.577	3.3731	0	4.70277	0	3.95157	4.45474	3.88097	4.2923	2.65294	4.80666	4.34474	4.68764	4.08328	4.62468	4.41839	4.3567	4.49823	4.60582	4.15756	5.00773	4.01215	4.94294	4.58195	3.0872	4.48159	3.89857	4.04025	3.90428	3.49644	4.30188	2.27544	4.94302
Armc3	4.20884	5.28871	5.78738	5.28395	5.33329	6.12073	3.8849	5.03452	4.90418	4.25838	3.20786	4.2923	4.63242	4.86995	5.01761	3.57968	3.93279	4.36658	5.32075	5.34892	5.37198	4.73485	5.50087	5.1134	5.10004	4.27152	6.29633	3.99972	2.66337	4.16498	5.44665	5.50506	5.60552	2.04288	0	3.7284
Armc5	3.25124	3.88309	2.97936	3.78723	4.76611	3.10781	3.61693	4.38262	3.60077	4.03101	3.73981	4.14845	0	3.6202	3.56886	4.1818	3.85122	4.05203	3.23158	3.13671	2.99415	3.338	2.85942	3.72512	3.43802	2.9759	1.67162	4.3035	4.17571	3.77651	3.16357	2.99755	2.91563	3.37323	4.03261	2.64429
Armc6	2.45554	1.04127	2.62404	2.88811	3.08557	0	2.24984	0	2.71503	0	1.24689	3.36411	3.15934	2.73299	1.49115	2.4025	2.12369	1.9585	1.9991	2.04197	0	3.07099	1.54859	2.40013	2.96548	3.34435	3.43772	2.24769	2.39728	2.68807	1.74041	2.16775	2.72475	2.85626	0	2.64429
Armc7	4.77939	5.03304	5.21542	4.78277	4.9951	5.6592	4.30608	5.60473	4.79271	4.54373	5.08573	4.2923	5.24892	4.0056	5.21811	3.79302	5.18029	4.48289	5.42509	5.89394	5.80849	4.63918	5.23193	5.18786	4.2602	5.23368	4.2912	5.74117	5.58343	5.66122	4.55315	5.20673	5.39724	3.75304	6.41805	5.02287
Armc8	5.95416	6.0914	5.89564	5.93949	4.9951	6.64486	5.22152	5.48189	5.61083	5.37372	4.52185	5.54083	6.12439	5.78065	5.99517	5.34118	5.11189	5.15538	6.2353	6.25952	6.1852	6.27264	6.20321	6.42557	6.07885	5.80581	6.19236	5.83891	4.33674	4.84937	6.49886	6.13679	6.43562	5.37743	5.67069	5.42677
Armcx3	3.03144	2.06148	0	3.05619	2.917	0	3.28757	0	4.73357	3.22827	3.20786	2.71766	2.65294	2.04892	3.04344	3.32923	3.57455	4.32563	2.80632	2.04197	3.1151	3.07099	4.23336	3.72512	3.43802	3.88117	3.92668	3.99972	2.88794	3.24325	3.61333	3.08499	3.08417	2.04288	0	1.45976
Armcx5	4.06161	2.06148	2.62404	3.52598	1.52216	3.63588	2.58698	0	3.30827	1.92238	3.40777	3.70992	3.83022	4.0609	3.41405	2.84651	2.12369	2.1583	3.32084	3.83307	2.55516	3.16559	3.70412	3.05911	2.47004	2.47983	2.09713	2.24769	3.25341	3.41672	3.23706	2.16775	3.23507	2.85626	3.64666	3.00046
Armt1	4.95655	5.10133	5.21542	5.89583	5.52146	0	4.95654	6.32979	4.46931	5.42146	4.96405	5.7041	4.77859	5.07188	5.28665	5.34118	4.92519	5.59514	5.64843	5.66928	4.95237	5.52327	5.37266	6.0263	5.25101	4.71044	6.3359	4.7679	5.64625	5.1242	5.33392	5.66968	5.5916	5.67046	4.3368	4.94302
Arnt	4.17342	4.07644	3.26422	4.4008	3.99798	5.14132	3.0896	4.84815	4.23354	4.14917	4.52185	3.6036	3.53343	4.70618	4.81593	4.1818	4.51269	4.40641	4.4971	4.78155	3.51745	4.4264	4.43943	4.76989	3.7124	2.47983	5.25388	2.24769	4.67477	3.64316	3.16357	4.64117	3.61128	4.51379	4.58789	4.94302
Arntl	2.45554	0.612609	1.84092	2.69784	0	2.26614	2.24984	2.31378	2.44702	1.92238	1.24689	0	2.65294	2.04892	2.00668	0.965476	1.81498	1.72651	1.76468	3.13671	1.92107	2.14307	1.95901	3.05911	2.00972	1.71772	2.42531	3.99972	3.25341	2.38808	2.50656	1.9979	1.73885	0	0	2.17033
Arpc1a	6.3686	6.6805	6.72815	6.45776	6.90551	7.36497	6.84475	5.92072	6.49277	6.54049	6.49608	6.918	6.62724	7.02552	6.72031	6.59615	6.4368	6.60602	6.82916	7.05244	6.6329	6.27264	6.47708	6.31916	7.12399	6.90733	7.61123	5.83891	6.5188	6.29339	6.95052	6.59714	6.98072	7.17543	7.08162	6.07733
Arpc1b	10.7048	10.5331	10.4492	10.3718	10.7721	11.0021	10.818	10.7015	10.9836	10.7233	10.7804	10.8728	10.7962	10.9075	11.0133	10.6564	10.8246	10.6309	10.5006	10.5929	10.5262	10.5518	10.4838	10.475	10.9019	10.6407	10.3819	10.8499	10.4456	10.6654	10.6562	10.8844	10.7954	10.6028	10.5536	10.3807
Arpc2	10.6365	10.6215	10.6333	10.2097	10.5931	10.9022	10.43	10.6737	10.5913	10.519	10.5287	10.4911	10.8592	10.5974	10.7137	10.4986	10.5767	10.4617	10.4613	10.5826	10.472	10.5157	10.3698	10.2746	10.7996	10.6241	10.7574	10.439	10.2895	10.3299	10.5197	10.7818	10.7134	10.1938	10.5011	10.3655
Arpc3	10.0208	9.94007	10.206	9.29576	9.26464	9.89722	9.65929	9.15222	9.78936	9.52959	9.59394	9.64311	9.93207	9.77456	9.80687	9.43105	9.48266	9.35302	10.0543	10.2117	10.1735	9.77063	10.0484	9.71773	9.91795	9.54989	10.8198	9.1852	8.99728	9.39337	10.174	10.1323	10.2336	9.17573	8.94458	9.03944
Arpc4	9.59664	9.65683	9.77407	9.092	9.38869	9.18979	9.41657	9.59901	9.62824	9.52413	9.64926	9.51515	9.46045	9.43197	9.56386	9.40391	9.46734	9.40063	9.6124	9.67446	9.83457	9.55492	9.67563	9.56079	9.74043	9.26326	10.5553	8.65165	8.99728	9.11511	9.85312	9.93089	9.85964	9.01968	8.83962	9.04901
Arpc5	10.6615	10.5305	10.7532	10.0149	10.071	10.4427	10.2279	10.7389	10.5735	10.3975	10.3909	10.4638	10.8218	10.421	10.5113	10.316	10.2995	10.3275	10.7465	10.9285	10.6866	10.2065	10.4877	10.1128	10.5861	10.3482	11.6239	10.0372	9.98831	10.0093	10.7019	10.7458	10.9847	9.86258	9.7571	10.0357
Arpc5l	5.72868	6.01084	5.8533	5.95021	5.60707	5.6592	6.40753	6.58983	6.21863	6.35621	6.42868	6.37175	6.06863	6.33457	6.27931	6.55288	6.10854	6.50877	5.88634	5.89394	5.8955	5.69169	5.95718	5.80759	5.75418	6.49629	6.58614	6.82625	5.41325	6.21331	6.21041	5.76543	6.36373	6.41377	5.67069	5.8334
Arpp19	9.03827	9.25494	9.2859	8.84177	8.84746	8.98805	8.96024	8.91168	8.67003	8.783	8.9036	8.88936	9.13361	8.99251	8.83352	8.81748	8.78433	8.79189	9.14854	9.20534	9.31547	8.99634	9.28725	9.08844	8.89097	8.82736	9.75183	8.44988	8.53212	9.05238	9.48389	9.20422	9.35863	8.68975	8.45357	8.79412
Arrb1	4.87069	5.03304	4.5994	5.60185	4.66327	4.79038	4.95654	5.60473	5.32058	5.51247	5.53352	5.62477	4.91131	5.38521	5.45495	4.93234	5.70627	4.84354	5.55953	5.50565	5.16342	5.03967	4.90109	4.80185	5.6274	5.47554	4.82382	5.83891	5.92489	5.59053	4.33619	5.08474	4.81338	5.83724	6.48145	6.28592
Arrb2	8.35939	8.23847	8.31185	7.8406	8.33129	7.11033	7.08986	8.20417	8.36856	7.59651	7.22222	7.65685	8.29038	8.12099	8.65056	7.39404	8.16629	7.21155	8.49944	8.72887	8.21153	8.0512	8.23529	8.21348	8.37705	7.74074	8.26209	7.55812	7.53601	7.56329	8.14412	8.6302	8.66826	7.32332	7.47335	7.3247
Arrdc1	5.25652	5.34613	5.21542	5.35015	5.68789	5.42337	5.60228	5.34761	5.32058	5.51247	4.1276	5.75465	4.77859	5.48965	5.19452	5.19875	5.50761	4.92804	5.00782	5.75508	5.6373	5.48709	5.48545	5.83874	5.1925	5.97286	5.58475	4.5543	4.25847	5.1734	5.31708	5.58222	5.09573	3.37323	4.58789	5.74198
Arrdc2	0.534577	1.37132	2.40707	1.90464	0.953156	0	1.80908	3.16087	1.07944	2.7183	3.20786	2.90837	1.86581	0	1.14236	1.53874	3.09687	1.9585	0.677619	3.25923	2.16472	1.09694	2.65411	1.50266	0.81292	0	0	0	2.66337	2.38808	1.74041	0.584029	2.09517	2.04288	0	3.52404
Arrdc3	4.70692	3.983	3.88486	4.4317	4.36864	3.63588	4.89716	4.63408	4.46931	5.2732	4.96405	4.8982	4.63242	4.16551	3.56886	4.45678	4.80036	5.15538	5.46479	5.57806	3.90065	4.08288	5.28632	4.70375	5.06785	4.83137	5.48266	3.99972	4.8977	5.35496	4.49442	5.1058	4.95059	4.86225	5.67069	5.87703
Arrdc4	5.38595	4.63262	5.03779	4.80654	5.15526	6.64486	5.44531	5.34761	5.23788	5.37372	5.02617	4.4843	3.83022	5.5294	5.26416	4.60534	4.80036	4.24007	5.11153	5.75508	4.81628	4.38768	5.0342	5.21185	5.10004	4.83137	5.95884	5.26649	5.41325	4.84937	5.15589	5.1672	5.3484	5.37743	6.13229	5.02287
Arsa	3.25124	3.83041	0.895917	3.73863	4.4938	3.10781	4.00227	2.31378	4.39492	3.6043	4.1276	4.54301	3.83022	3.29076	4.75272	3.97883	3.46913	4.28349	1.9991	3.57449	3.33026	4.63918	3.90289	3.7903	3.94284	3.88117	3.28434	3.99972	4.84512	3.95593	2.82526	3.45689	2.91563	4.51379	4.98785	3.00046
Arsb	5.99531	6.68792	6.30983	7.75155	6.83629	4.97649	6.04678	4.07788	5.61083	4.62755	6.09363	5.8965	5.60304	5.69585	6.13805	5.54628	5.94123	5.78837	6.3135	5.50565	6.44954	7.34135	6.62512	7.45785	6.35709	5.23368	4.98185	4.7679	5.58343	5.19738	5.66208	5.93976	5.93811	5.48186	3.64666	5.17043
Arsg	3.76112	3.15952	3.26422	2.69784	4.15784	3.10781	1.80908	3.69104	3.84384	2.37454	2.97572	2.49783	2.65294	4.16551	4.21005	3.63604	3.23192	3.35573	3.63116	4.18185	4.45305	3.69594	4.15756	3.05911	4.20207	3.34435	3.92668	4.95391	2.07076	2.54586	4.15845	4.04176	4.49229	0	3.11818	3.52404
Arsk	3.98195	4.12099	3.79825	3.40661	1.92915	4.79038	2.86007	0	4.46931	1.26017	4.23671	2.23839	3.15934	3.46486	2.54342	1.9479	3.85122	3.08833	3.32084	3.98284	2.71679	4.30696	2.41466	2.94923	2.25816	2.9759	3.28434	0	4.08791	2.54586	3.71971	3.24542	3.4354	0	3.11818	4.20995
Art2b	3.44193	2.65311	2.15159	2.88811	2.24623	2.26614	3.28757	2.31378	1.68994	1.92238	2.69893	2.90837	3.53343	3.19514	2.3857	3.10797	3.67279	3.83575	2.53505	3.00282	2.71679	3.07099	3.4096	2.94923	2.47004	2.9759	2.91784	0	2.66337	2.38808	2.82526	2.16775	1.52113	2.85626	3.11818	3.52404
Arv1	2.67406	2.38741	0	0.543356	2.24623	0	1.17127	2.31378	1.07944	0	3.20786	1.92182	4.07625	0	2.81498	1.9479	0	0	2.53505	2.29207	1.25914	1.94392	2.53935	2.70065	2.96548	1.71772	2.91784	0	2.07076	2.68807	0.953469	2.31969	0.553399	0	0	0
As3mt	4.68192	4.69288	4.54724	5.08448	4.76611	5.5461	4.47804	5.34761	4.31649	4.62755	5.08573	4.94249	4.28637	4.70618	4.68662	4.29115	4.61509	4.40641	4.77494	4.3567	4.78015	3.81747	4.96918	4.63444	4.1415	5.39934	4.44389	4.7679	4.79054	5.1734	4.76674	3.80475	4.43107	3.75304	4.98785	5.694
Asah1	5.95416	5.66471	6.35605	5.88471	6.13487	7.02848	6.74723	6.58983	6.36221	6.85062	6.12236	6.25368	6.01063	6.76747	5.99517	6.28853	5.99918	6.37467	6.25808	5.77575	5.77217	5.9394	5.81641	5.51155	6.28891	6.25819	6.21376	6.17463	5.79229	5.89917	6.21041	5.92798	6.12367	6.24595	5.67069	6.18539
Asap1	6.27142	6.13549	6.26209	6.40423	6.75109	7.11033	5.96238	6.01234	6.6125	5.42146	5.69521	5.7296	5.60304	6.24191	6.48777	6.15988	5.79619	6.02419	6.12809	6.13703	5.55417	6.39484	5.60441	6.18015	6.06261	6.16921	4.0268	5.74117	6.30182	5.22098	5.95126	5.92798	5.97074	6.56408	6.28224	6.60414
Asap2	0	2.23363	0.895917	1.90464	2.24623	4.02161	3.0896	0	2.44702	0	2.35611	2.23839	3.15934	1.81162	2.54342	2.84651	0	2.49019	1.48465	2.29207	1.92107	0.650307	1.54859	0	2.25816	2.47983	2.69249	0	1.64803	1.49305	1.52258	0.9986	0	2.04288	2.27544	3.00046
Asb1	0.923746	3.39539	1.84092	3.13342	3.23648	0	3.75713	4.38262	1.07944	2.37454	3.20786	1.92182	0	2.43113	3.83609	2.52696	4.15302	2.1583	3.32084	4.05227	3.96643	3.49199	3.2726	3.16121	3.53539	5.47554	2.69249	2.24769	2.66337	3.33259	2.82526	2.31969	3.30498	3.75304	4.58789	2.17033
Asb13	2.67406	2.06148	1.44445	2.07091	2.917	3.10781	2.58698	3.69104	1.68994	2.7183	2.69893	2.71766	4.91131	3.29076	2.81498	2.4025	3.09687	1.9585	2.67705	2.04197	0.762784	1.4375	2.53935	2.22258	2.47004	2.47983	2.42531	0	2.39728	2.38808	1.92963	1.9979	1.73885	2.85626	0	3.28587
Asb17os	0.534577	0	0	0	3.3731	0	1.80908	0	0	0	0	0	0	2.43113	0.681414	0.562039	3.23192	1.10744	3.69933	2.04197	3.75934	1.4375	0.56689	2.5582	2.00972	2.47983	3.92668	3.61443	1.64803	3.04603	0	2.45714	2.24498	2.85626	2.27544	3.90738
Asb3	2.95005	3.53362	2.97936	3.46753	1.92915	0	2.86007	4.38262	0	3.22827	2.69893	2.23839	3.83022	2.25264	2.54342	4.06348	2.59385	3.7141	2.80632	2.50515	3.42689	2.74309	3.34273	3.58519	3.7124	2.9759	3.43772	2.24769	2.88794	2.68807	3.7701	3.16744	3.8638	0	0	3.00046
Asb6	4.4937	3.71891	4.37839	4.49159	4.08013	0	3.46163	0	4.46931	2.9957	4.43292	4.54301	4.28637	3.88821	3.64045	3.84176	3.57455	3.89293	3.99887	4.11851	4.81628	4.03356	4.26981	4.40395	4.65629	4.71044	3.28434	3.0872	3.67098	4.68945	3.61333	4.87994	4.55102	2.85626	4.80168	4.06658
Asb7	5.35466	5.10133	4.37839	4.12639	4.60896	4.97649	4.89716	4.63408	5.76645	4.70677	4.60561	4.35918	5.52232	4.44032	5.75826	4.86319	4.21954	4.92804	5.57776	5.8749	5.7349	5.20471	5.28632	4.92307	5.60514	3.34435	5.29462	4.95391	5.17838	5.28952	5.36704	6.00847	5.97074	3.75304	4.03261	4.20995
Asb8	5.13288	4.96136	4.96013	4.709	4.71561	4.57665	5.17228	2.31378	4.95684	5.10793	4.33815	5.28971	4.91131	4.80666	5.30879	4.66073	4.45864	5.08351	5.18469	4.89928	5.07672	5.46865	5.05524	4.95184	5.36136	5.23368	5.58475	3.61443	4.73382	5.39699	4.55315	4.58228	4.97224	4.0534	4.98785	5.36683
Ascc1	4.73148	5.55535	5.56933	5.85081	6.17281	5.28923	6.29701	6.32979	5.5087	5.2732	5.39913	5.67814	3.83022	6.20556	5.62342	5.90852	5.50761	5.80336	5.57776	5.14155	5.5754	5.95272	6.03338	6.16794	5.38768	4.71044	6.55294	5.40059	5.67666	5.57231	5.38332	5.26406	5.15372	6.35997	4.58789	5.64437
Ascc2	3.10849	4.03048	3.38801	4.65764	3.99798	4.57665	3.75713	5.34761	4.84952	3.4285	4.83116	4.8982	5.34593	4.30945	5.04425	4.6333	4.01	5.15538	4.37736	3.57449	3.33026	4.03356	2.76042	4.36169	3.79337	5.14313	2.69249	4.3035	5.58343	3.57156	4.2322	3.75229	3.66545	4.51379	5.67069	4.85848
Ascc3	5.43164	5.60324	5.62071	5.41345	4.71561	4.79038	3.8849	5.19954	4.90418	5.10793	4.43292	3.48882	3.53343	4.44032	4.6524	4.81517	4.61509	4.75378	4.92483	5.57806	3.60267	5.01447	4.96918	5.45236	5.06785	5.39934	4.20834	5.11865	3.99443	5.02046	4.81553	4.52088	5.07586	5.00929	4.80168	4.67293
Ascl2	2.56893	3.07147	3.50201	1.50051	2.50602	0	3.61693	3.16087	1.68994	2.7183	2.97572	4.07077	3.15934	3.88821	3.56886	3.25918	2.94788	3.18308	3.99887	4.41057	4.35821	2.96975	3.12122	3.16121	3.62661	0	5.0309	2.24769	2.39728	3.77651	3.7701	3.521	3.23507	4.30188	4.98785	3.7284
Asf1a	5.37039	4.20615	4.99948	5.60185	4.08013	4.97649	5.77716	5.03452	5.19468	5.04834	5.25092	5.255	3.83022	5.5294	5.39411	4.88661	4.84318	5.13182	5.18469	5.50565	5.51073	5.33255	5.88851	5.53075	5.03492	5.74553	6.00867	4.7679	5.04486	5.39699	5.39941	5.26406	5.33175	5.00929	5.67069	5.30429
Asf1b	6.3686	6.658	6.76287	7.29845	7.02439	5.6592	7.22881	7.16979	6.90826	6.90202	6.91261	7.08537	7.54017	7.07336	6.55415	6.78247	6.96865	6.89905	6.65129	5.7341	6.78649	7.16937	7.04353	7.45785	6.78102	7.15915	7.12715	6.82625	6.34032	6.77992	7.13966	6.95722	6.71141	6.18538	5.77559	6.31793
Ash1l	6.03533	5.60324	5.83166	5.90687	4.86211	5.76408	4.39462	6.09849	4.84952	4.62755	4.52185	4.80532	4.91131	5.01701	4.90584	5.10202	4.75622	4.81424	5.94367	6.15292	4.88593	5.13628	5.0342	5.03488	5.10004	5.54792	4.51457	6.38341	5.58343	4.34754	5.60771	5.45669	5.6599	5.37743	5.15271	5.64437
Ash2l	4.55003	5.14512	5.34328	5.21457	4.43258	5.76408	5.17228	5.19954	5.00765	5.42146	4.83116	5.75465	4.63242	5.71322	5.45495	5.30687	5.1465	5.54251	4.37736	4.74007	4.91953	5.18226	4.99118	4.80185	5.4884	5.0465	4.76705	4.95391	5.48375	5.24419	4.79134	4.24527	4.15635	5.83724	5.77559	5.74198
Asl	3.80808	3.59806	3.12881	3.73863	4.43258	2.26614	4.1108	4.07788	4.05181	3.4285	4.00955	2.90837	4.28637	4.0609	4.11272	4.14343	3.57455	4.36658	3.94373	3.00282	3.83172	3.49199	4.26981	4.07823	4.4718	1.71772	3.28434	2.24769	3.54476	3.77651	3.91149	4.04176	4.19369	2.85626	3.64666	4.06658
Asna1	4.02233	3.71891	3.50201	4.0881	3.08557	4.57665	4.00227	4.84815	4.46931	3.76098	4.75983	4.22217	4.91131	4.11415	4.1622	3.57968	4.5648	4.44516	3.4049	3.98284	3.51745	4.13056	4.40706	3.58519	3.94284	4.83137	4.2912	3.99972	4.5489	4.43083	3.43743	3.45689	4.15635	4.0534	4.58789	2.64429
Asns	5.8001	5.40135	5.51605	5.80434	6.38158	6.40647	4.95654	6.81008	5.82428	4.62755	5.57568	5.54083	6.01063	5.36338	5.86672	5.10202	5.18029	5.00787	6.47778	5.04265	5.67714	5.88482	4.70205	5.7432	6.2464	6.21438	5.74031	6.44679	5.17838	6.09062	5.7273	5.35482	6.13331	5.67046	4.58789	4.85848
Asnsd1	6.93191	6.88805	7.33188	6.85545	6.46038	5.76408	6.64264	6.52908	6.47483	6.30621	6.66179	6.21808	7.05784	6.42164	6.46823	6.67224	6.33546	6.56263	7.15463	7.00945	6.81355	6.91403	6.98443	6.87198	6.84889	6.96133	7.30717	6.01651	6.28217	6.21331	7.12521	6.9745	6.95376	6.24595	6.76236	6.07733
Asph	3.31764	3.2425	2.15159	3.63622	3.91088	0	4.1108	0	3.95157	4.70677	4.75983	3.70992	3.83022	3.29076	3.32994	4.1818	4.21954	4.00092	3.13643	3.00282	2.37311	2.61483	3.70412	3.16121	2.96548	4.27152	3.28434	4.3035	4.08791	3.33259	3.9557	3.08499	2.61893	5.00929	4.03261	4.67293
Aspm	5.11432	5.45453	4.91967	6.55219	5.78905	5.14132	5.26914	5.34761	5.19468	4.54373	4.96405	4.22217	6.01063	5.44878	5.47467	5.68632	5.30807	5.80336	4.743	4.56108	4.91953	5.18226	5.6604	5.5497	5.38768	5.61684	3.57635	5.26649	5.70645	4.78751	4.7417	4.58228	4.52195	3.75304	4.58789	4.67293
Aspn	0.534577	0	2.15159	0.937132	0	3.10781	1.80908	0	0	1.92238	1.24689	1.51568	0	1.52746	1.49115	0.965476	2.37784	1.10744	1.76468	2.04197	1.62774	1.09694	1.54859	1.78444	0	0	2.42531	2.24769	2.07076	2.00889	2.09688	1.9979	2.91563	2.04288	0	2.64429
Asprv1	5.72868	5.38317	6.29409	2.9746	4.30174	5.14132	2.86007	5.03452	5.54356	6.72305	5.3514	5.06775	5.24892	4.35441	5.83656	6.3488	6.24254	6.02419	7.19651	7.23522	6.1852	5.2486	5.38932	4.76989	6.3302	6.3007	6.95992	8.37039	7.96972	7.75325	6.36593	7.19197	7.46593	7.4316	7.37662	7.75708
Aspscr1	2.45554	2.52637	3.38801	2.79611	2.24623	2.26614	3.46163	0	2.71503	1.26017	3.58332	3.22759	1.86581	1.17325	2.81498	3.32923	3.09687	2.1583	2.53505	0.831486	3.42689	2.61483	2.76042	3.05911	2.00972	3.34435	0	3.0872	2.39728	3.33259	1.52258	1.9979	2.50472	3.75304	0	1.45976
Asrgl1	3.76112	4.20615	4.4369	4.9415	5.15526	4.02161	5.22152	4.38262	4.79271	5.42146	3.88097	4.75653	5.03284	4.74046	4.75272	5.12189	5.18029	5.22384	4.37736	4.46251	4.30834	5.11273	4.805	5.28152	4.4718	4.71044	4.58195	3.99972	4.73382	5.24419	4.79134	4.31927	4.11802	5.83724	5.55758	5.48433
Ass1	5.1512	4.43509	4.11728	5.24968	5.49175	5.42337	6.25031	4.84815	6.17484	6.30621	5.87476	6.55408	5.82118	5.95132	5.82124	6.27971	6.4368	6.44328	4.05198	4.05227	4.70506	5.46865	5.25029	5.0877	5.46387	6.49629	6.03295	5.83891	5.89933	6.15327	5.39941	5.14703	5.15372	6.05602	5.67069	5.694
Aste1	2.45554	2.8774	1.44445	1.24615	3.08557	0	0	0	2.71503	1.26017	0	0.948355	1.86581	2.25264	1.14236	3.10797	2.7817	1.72651	2.37754	1.3556	2.55516	2.47405	0.56689	2.5582	2.00972	0	1.06547	0	2.88794	2.21091	2.09688	0.584029	1.26461	0	0	0
Astn2	0.923746	2.23363	2.81261	1.90464	0	0	1.80908	0	2.11758	1.92238	1.90558	2.90837	0	2.04892	2.3857	1.53874	2.12369	1.72651	1.76468	1.73922	1.62774	1.09694	1.95901	0.688148	1.70942	2.47983	3.1127	0	1.64803	0.682524	1.92963	1.80535	0.952392	0	2.27544	2.64429
Asun	5.18717	5.32724	5.03779	5.04505	5.19267	4.79038	4.21174	3.69104	4.6719	5.22018	4.89914	5.21945	5.03284	4.86995	4.21005	4.14343	4.96452	4.59052	5.36339	5.17306	5.37198	4.88142	5.09641	4.40395	4.74039	5.23368	4.44389	4.95391	4.67477	4.47074	4.81553	4.83019	4.90629	4.30188	4.3368	5.09854
Asxl1	5.32268	4.91151	5.74169	5.42885	5.43044	3.63588	5.06844	5.34761	5.47299	4.62755	4.60561	5.14559	6.01063	5.46936	4.72005	4.86319	4.96452	5.17857	5.48425	5.89394	5.67714	5.3528	5.63268	5.30402	5.36136	5.86367	4.70795	5.40059	5.8198	5.497	4.86273	5.08474	5.54902	5.91391	5.30065	5.23891
Asxl2	5.35466	4.83335	4.5994	5.19669	5.0774	4.57665	4.5569	5.19954	3.13628	3.4285	4.83116	3.9016	4.77859	4.52141	4.78468	4.45678	4.28313	4.44516	4.6427	5.29265	5.51073	4.38768	4.70205	4.86373	3.94284	5.0465	2.91784	4.3035	4.99746	4.47074	4.63699	5.08474	4.55102	5.37743	0	4.67293
Asz1	3.98195	3.71891	3.7061	3.27647	3.23648	4.79038	4.47804	5.60473	4.90418	4.85324	4.83116	4.22217	3.15934	3.54462	4.21005	3.45988	4.01	3.83575	4.05198	3.75192	4.14749	4.34788	3.4096	3.7903	4.20207	4.43313	4.64633	3.99972	4.17571	4.47074	3.81878	4.12664	4.07864	5.26484	4.03261	3.7284
Atad1	4.60424	5.41929	4.11728	5.47408	4.9951	4.97649	5.12129	5.34761	4.73357	5.63904	4.68478	5.8035	5.24892	4.11415	5.14615	5.06143	5.48074	5.71098	4.57173	4.89928	5.01588	5.60994	5.05524	5.06153	5.46387	4.94294	5.58475	4.95391	5.44893	4.87933	4.6903	4.83019	4.86058	6.12215	4.58789	5.48433
Atad2	6.05492	6.17828	5.56933	7.09147	5.86052	4.79038	6.15213	5.34761	5.85235	6.11617	6.47396	6.08611	6.22983	5.92175	5.83656	6.69895	6.33546	6.135	5.81131	5.29265	5.7349	6.35525	5.96832	6.90178	5.71314	6.45924	5.79812	5.40059	6.58444	6.30447	5.64868	5.44021	5.7123	5.83724	6.35174	6.46812
Atad2b	5.32268	4.96136	4.37839	5.23223	4.60896	3.63588	4.1108	5.34761	4.46931	4.45474	4.52185	4.35918	4.63242	4.95998	4.84653	5.16083	4.84318	4.92804	4.95303	5.17306	4.666	5.29118	4.30537	5.41151	4.93139	4.94294	4.36957	5.74117	4.99746	4.75556	4.33619	4.75219	4.39946	3.75304	5.15271	5.59297
Atad3a	3.76112	3.88309	3.50201	4.12639	4.15784	2.26614	4.47804	2.31378	4.23354	4.3599	4.23671	4.14845	1.86581	4.63509	3.89582	4.39279	5.27717	5.15538	3.69933	2.85522	3.75934	4.53671	4.11812	4.31815	4.36987	4.94294	2.42531	5.11865	5.44893	5.53515	3.99859	3.64128	3.8638	3.37323	6.35174	5.48433
Atad5	5.01775	4.98565	3.79825	5.90687	4.15784	4.32566	4.30608	4.07788	3.30827	4.25838	5.30204	4.2923	5.03284	3.76042	4.46792	5.12189	3.85122	4.51967	5.03445	4.46251	4.85152	4.96272	4.61971	4.44502	4.31608	4.71044	2.91784	4.95391	5.37667	5.53515	4.40158	4.16728	4.39946	4.86225	4.98785	4.67293
Atat1	3.03144	1.37132	2.15159	2.69784	2.50602	0	2.86007	0	1.68994	0	0	0	2.65294	2.04892	2.2086	0.562039	2.12369	1.10744	2.80632	1.3556	3.1151	1.09694	0.972806	2.02008	2.47004	1.71772	2.91784	0	0	1.14397	2.50656	2.31969	3.16159	2.04288	0	1.45976
Atcay	1.48237	1.37132	1.44445	2.07091	0.953156	2.26614	2.86007	0	1.68994	2.7183	2.69893	3.07679	1.86581	2.73299	1.49115	2.93903	2.59385	2.98692	1.48465	0.831486	2.37311	2.14307	1.54859	2.02008	2.47004	1.71772	3.1127	2.24769	2.88794	3.04603	3.43743	1.9979	2.61893	3.37323	0	2.17033
Ate1	6.37641	6.05742	6.34081	5.45916	5.39878	2.26614	5.44531	4.63408	5.36022	4.85324	5.25092	5.32359	6.27979	5.44878	5.53226	5.72581	4.75622	5.22384	5.79583	6.15292	5.97755	5.37277	5.6604	6.40491	5.67091	5.0465	4.70795	5.83891	5.55096	5.14901	5.82587	5.69769	5.57755	6.12215	5.87336	5.59297
Atf1	5.93313	5.87439	5.76472	5.53227	5.88358	4.57665	5.56461	5.60473	5.10419	5.51247	5.57568	5.32359	5.03284	5.29584	5.30879	5.618	5.00279	6.06208	5.71581	5.71282	5.7349	5.57589	5.61861	5.69295	5.16234	5.74553	6.29633	4.7679	5.8198	5.35496	5.38332	5.45669	6.02354	5.75626	4.3368	5.74198
Atf2	5.1512	5.64959	4.79101	5.85081	4.60896	5.6592	4.30608	5.03452	4.39492	5.59807	5.14292	3.9016	4.91131	5.17573	5.67548	4.42514	5.11189	5.05874	5.00782	5.34892	5.1351	5.11273	4.85384	4.95184	5.13152	5.23368	4.20834	4.5543	4.5489	4.99332	4.6903	5.12656	5.01458	5.00929	4.58789	5.42677
Atf3	7.73572	7.80554	7.94442	8.38352	8.10965	8.76613	8.60882	8.57855	8.49413	7.9211	6.96112	7.46522	7.54017	8.33519	7.80197	7.9638	8.26408	6.50877	6.96689	7.19741	6.78649	6.48015	7.51144	6.69605	6.82982	6.70061	5.12427	8.21523	7.11526	6.70661	6.05651	6.96301	5.6599	6.82457	6.54218	7.10381
Atf4	7.97053	7.95143	8.11089	8.1245	7.93302	8.29209	8.04407	8.4203	7.98698	7.47732	7.66444	7.33836	7.86874	8.12099	7.8252	7.71507	7.66166	7.51455	7.74833	8.04274	7.90683	7.81624	8.3268	8.23413	7.76444	7.64499	7.34645	7.34178	7.68558	7.71638	7.86868	7.96299	7.93421	7.35116	7.90189	8.03257
Atf5	2.45554	4.28657	1.84092	3.40661	3.91088	3.10781	3.61693	4.38262	3.13628	3.22827	4.60561	4.14845	2.65294	3.54462	3.70865	3.39603	4.08328	3.18308	3.63116	3.00282	4.08963	3.338	2.65411	3.58519	3.79337	5.23368	3.28434	3.0872	3.67098	3.04603	3.49848	3.85537	3.08417	3.37323	4.58789	3.00046
Atf6	4.77939	4.75072	5.43225	5.50347	5.5791	5.76408	5.6748	6.01234	5.43637	5.2732	5.84059	5.94084	4.28637	5.20057	5.19452	5.95357	6.0549	5.56027	4.80619	4.3567	4.58455	5.27005	4.82963	5.34798	5.06785	4.83137	3.57635	4.95391	6.15833	4.96566	4.36926	4.2068	4.23009	5.00929	4.98785	6.03943
Atf6b	4.34243	4.60152	4.11728	4.4008	4.66327	4.57665	4.70277	4.84815	4.46931	4.14917	4.96405	5.14559	4.46974	4.67107	4.87649	4.68764	4.08328	4.84354	4.05198	4.60795	4.81628	4.67178	4.67512	4.89371	3.94284	3.34435	3.70281	4.7679	5.04486	4.54739	4.12012	4.61202	4.68816	5.14271	5.55758	4.34035
Atf7	4.17342	4.24692	3.60766	3.87978	2.7261	4.02161	4.47804	4.07788	3.30827	3.9023	4.75983	3.9016	3.83022	4.35441	3.70865	4.21918	3.35539	4.36658	3.55961	4.05227	2.71679	4.34788	3.53471	3.50978	4.01215	4.27152	3.1127	3.61443	4.79054	3.64316	3.49848	3.64128	3.23507	5.14271	4.3368	4.45993
Atf7ip	6.26302	5.9627	6.5002	6.04319	5.83709	5.14132	4.77051	5.71793	6.01019	6.11617	6.06433	5.7296	5.34593	5.60576	5.28665	5.48622	5.72928	5.80336	6.02561	6.3029	6.08511	5.37277	5.84085	5.95702	6.12651	6.25819	5.649	6.56576	6.26226	5.89917	5.67537	5.96303	6.08445	5.37743	6.76236	6.07733
Atg10	4.1371	3.65975	3.88486	4.46195	2.917	3.10781	4.30608	5.03452	4.6719	4.45474	4.83116	4.4843	4.77859	4.39801	4.30122	3.84176	4.08328	3.89293	3.8267	3.66593	3.22668	4.53671	4.50206	3.05911	4.2602	5.0465	4.93107	3.0872	3.78704	3.57156	4.15845	3.75229	4.52195	3.37323	3.64666	3.28587
Atg101	6.60631	6.06884	6.52738	6.04319	5.90628	5.5461	5.06844	5.48189	5.61083	5.67888	5.19793	5.56936	6.12439	5.01701	5.95361	5.37469	5.77423	5.43109	6.35636	5.98553	6.46099	6.20743	5.86488	6.23971	6.49662	5.54792	6.53605	5.83891	5.70645	5.62631	5.84949	6.26402	5.99209	5.00929	4.03261	5.02287
Atg12	6.13996	6.20955	6.24582	6.16773	5.63452	5.42337	5.96238	6.01234	5.7062	5.67888	5.02617	5.62477	5.88714	5.50967	5.3306	5.60393	5.45336	5.80336	6.5255	6.35878	6.60219	5.99198	6.20321	5.97114	6.17264	5.80581	6.82736	6.09774	5.51775	5.14901	6.10639	6.35479	6.22634	5.83724	7.12197	6.11426
Atg13	4.20884	4.12099	4.04389	4.4317	4.71561	4.57665	4.5569	5.82288	5.00765	4.98619	4.75983	4.70604	3.53343	4.0609	4.42802	5.32413	5.5599	5.10787	4.83678	4.18185	5.3226	4.70366	4.15756	4.40395	4.89516	3.88117	3.1127	4.5543	5.48375	4.54739	3.86588	4.08483	4.19369	3.37323	3.11818	4.85848
Atg14	4.34243	3.46616	4.83518	4.33693	3.71911	2.26614	3.28757	2.31378	0	3.22827	1.90558	2.71766	2.65294	3.54462	3.32994	3.63604	2.94788	2.6313	3.69933	3.9099	3.42689	3.81747	4.37395	4.56163	1.70942	4.71044	3.28434	3.99972	3.40643	1.7739	3.23706	3.69785	2.61893	3.37323	4.3368	4.20995
Atg16l1	4.24342	3.2425	4.04389	3.40661	3.3731	3.10781	2.86007	0	3.46192	2.9957	2.35611	3.07679	2.65294	3.38044	3.41405	3.45988	3.09687	2.33377	4.57173	4.24252	3.33026	3.69594	3.85571	3.65685	3.53539	2.9759	2.69249	2.24769	3.08222	3.49621	3.6675	3.31941	4.03815	2.04288	0	5.17043
Atg16l2	4.89264	4.56973	5.11149	5.19669	4.9951	4.97649	4.1108	5.03452	5.36022	2.37454	3.20786	3.9016	5.43682	4.98878	4.81593	3.32923	4.92519	3.7762	4.45828	5.77575	4.81628	5.15945	4.82963	5.25867	4.52018	4.43313	4.0268	5.26649	4.41098	3.33259	4.60958	4.58228	4.66175	2.85626	0	2.17033
Atg2a	3.98195	3.53362	3.88486	3.83425	4.55253	4.02161	3.8849	4.84815	5.10419	4.3599	4.52185	4.85251	4.28637	4.30945	4.50675	3.45988	5.00279	3.94794	4.60765	4.24252	4.62585	3.41705	4.75444	4.07823	4.07827	3.63759	2.09713	4.3035	3.78704	3.64316	3.6675	4.16728	3.8638	4.86225	0	3.52404
Atg2b	2.56893	3.39539	3.50201	4.27011	4.30174	2.26614	1.80908	0	4.39492	3.76098	1.24689	3.48882	4.28637	3.38044	3.56886	3.10797	2.94788	3.94794	2.20069	2.29207	3.33026	3.75799	4.15756	3.65685	3.62661	4.27152	2.91784	3.0872	3.99443	3.49621	2.24674	3.38978	3.08417	2.04288	4.3368	3.7284
Atg3	7.9961	7.74279	7.79027	7.3068	7.10508	7.58134	7.4412	7.77776	7.52889	7.66753	7.03851	7.20836	7.34277	7.26214	7.60578	7.26594	7.43547	7.50082	7.93308	8.18864	7.4924	7.23629	7.53034	7.37528	7.31437	7.31245	8.15	7.74622	7.56068	7.82043	7.86868	8.09261	8.07093	7.69324	8.11678	7.68527
Atg4a	4.73148	4.93665	4.79101	3.40661	4.30174	3.10781	3.46163	4.38262	4.23354	4.54373	4.75983	4.70604	3.83022	4.11415	4.61734	4.02178	4.21954	3.89293	5.00782	4.78155	4.58455	3.07099	3.75644	3.34599	4.52018	5.31889	4.58195	2.24769	4.48159	4.62017	4.58164	3.99737	4.86058	3.37323	3.11818	4.06658
Atg4b	4.89264	5.26905	4.99948	4.36922	4.90781	4.32566	4.47804	3.69104	4.14554	4.54373	4.83116	5.255	4.28637	4.80666	4.78468	5.16083	4.61509	4.81424	4.80619	5.40308	5.01588	5.59301	4.85384	5.0877	5.30724	5.74553	5.95884	5.40059	5.51775	5.1242	4.93076	4.90418	4.88362	5.26484	5.55758	4.94302
Atg4c	2.86379	3.39539	2.81261	2.35508	2.50602	0	2.24984	0	1.68994	3.4285	2.69893	3.80894	3.15934	2.98249	2.00668	1.75778	2.94788	2.49019	3.32084	3.25923	3.33026	2.47405	2.65411	2.70065	2.65474	2.9759	2.42531	3.61443	2.39728	2.81751	1.26591	2.45714	3.4354	0	2.27544	3.7284
Atg4d	4.99764	4.75072	4.69838	4.20004	4.36864	4.79038	4.00227	4.07788	4.6719	4.54373	4.83116	4.65372	4.46974	4.74046	4.21005	4.39279	3.67279	4.95515	5.27681	4.74007	5.01588	4.88142	5.05524	5.00773	4.78066	5.23368	5.74031	4.7679	3.89446	4.65523	4.43319	5.40666	5.33175	2.85626	4.98785	3.90738
Atg5	6.63264	6.14631	6.29409	5.91783	5.83709	6.12073	5.80973	5.34761	6.52801	6.33143	6.15052	5.96251	6.32808	5.74733	6.04878	6.15988	5.36796	5.94528	6.2353	6.31707	6.09984	6.19627	6.33807	6.22799	5.92563	5.74553	6.93436	6.17463	5.73563	5.85461	6.62741	6.21641	6.42781	6.18538	5.55758	5.48433
Atg7	5.93313	5.93802	6.38605	5.79248	6.26349	6.12073	5.87274	6.32979	6.41962	5.96325	6.20525	6.37175	6.12439	6.24191	6.10046	5.618	5.65911	5.84742	6.26934	6.07165	5.8955	6.21851	5.61861	5.7432	6.26071	6.342	5.95884	5.83891	6.04632	5.92812	5.92926	6.20669	6.24425	4.86225	6.13229	5.64437
Atg9a	4.43508	5.24912	4.69838	4.52062	4.86211	3.63588	4.47804	5.19954	4.60748	1.92238	4.52185	4.80532	5.88714	4.16551	4.54457	3.79302	3.67279	4.24007	5.40481	5.34892	4.85152	4.93612	5.05524	4.76989	4.85799	4.71044	4.0268	5.74117	3.89446	4.43083	4.2322	5.20673	4.90629	2.85626	0	4.76869
Atic	4.1371	4.77879	4.74544	4.8979	5.19267	3.63588	5.56461	4.63408	5.10419	5.04834	6.09363	5.67814	4.28637	5.48965	5.21811	6.33183	5.65911	6.35446	3.8267	4.41057	4.40641	5.06443	4.26981	5.1134	5.10004	6.21438	5.44696	6.38341	6.50191	6.28222	4.76674	5.1672	4.88362	5.91391	5.87336	5.74198
Atl2	4.8484	4.28657	4.79101	4.80654	4.36864	2.26614	5.35991	3.16087	4.14554	4.98619	3.88097	4.2923	4.63242	4.56031	3.77378	4.14343	3.76476	4.28349	4.71033	5.2039	4.54203	4.30696	4.92414	5.00773	4.69895	4.83137	4.2912	5.52327	5.22028	4.16498	4.7417	4.69775	4.15635	4.0534	5.43483	4.67293
Atl3	3.89763	4.66306	3.79825	5.24968	4.81491	4.79038	4.5569	2.31378	4.73357	4.03101	5.39913	4.65372	4.77859	5.3187	4.34474	4.32583	4.84318	4.48289	4.1032	4.11851	4.666	4.63918	4.87766	4.83312	4.89516	4.27152	4.44389	5.26649	4.73382	4.43083	4.90844	4.24527	4.99356	3.37323	5.67069	4.67293
Atm	3.31764	2.38741	2.40707	2.9746	3.08557	4.32566	1.80908	0	2.11758	1.26017	4.23671	3.48882	3.15934	2.25264	1.77182	4.06348	2.7817	3.18308	3.13643	2.04197	2.55516	2.47405	2.27817	3.43021	0.81292	2.47983	2.42531	0	2.39728	4.21283	2.50656	2.58263	2.09517	4.51379	4.58789	5.74198
Atmin	3.50028	2.8774	3.79825	4.577	4.90781	4.79038	4.47804	5.03452	4.23354	4.03101	4.33815	4.54301	3.15934	4.44032	3.70865	4.06348	4.66368	4.14911	3.13643	3.9099	4.49823	4.53671	3.03912	3.43021	4.1415	4.94294	1.06547	5.11865	4.17571	4.06424	3.16357	3.16744	3.16159	4.86225	5.30065	3.90738
Atn1	3.50028	2.9777	3.26422	3.73863	3.23648	2.26614	3.46163	4.07788	3.95157	3.76098	4.68478	3.70992	2.65294	3.6202	2.81498	3.18555	4.01	2.98692	3.99887	3.37214	3.60267	3.69594	4.07757	3.65685	3.33359	4.27152	2.09713	2.24769	3.54476	3.04603	3.30699	3.64128	4.15635	4.0534	4.3368	3.52404
Atoh7	2.19791	0.612609	2.15159	2.59238	1.92915	3.10781	1.80908	3.16087	2.44702	3.76098	0	0.948355	0	2.73299	1.14236	0.965476	1.81498	1.72651	1.48465	2.04197	1.62774	1.09694	1.76835	2.02008	1.32971	0	1.06547	3.0872	2.07076	2.00889	2.09688	2.80495	1.52113	2.04288	0	2.17033
Atox1	9.26659	9.39302	9.5034	9.04905	9.41069	9.33304	9.50872	9.41819	9.22861	9.5214	9.42553	9.5971	9.44411	9.49104	9.22417	9.44393	9.2637	9.41656	9.52118	9.71249	9.6728	9.24001	9.61935	9.35265	9.51726	9.43053	10.5501	8.93192	9.06208	9.44937	9.92229	9.38952	9.59677	9.20654	8.75236	9.43931
Atp10a	2.45554	2.38741	1.44445	2.59238	2.7261	0	1.80908	2.31378	2.44702	3.76098	3.20786	2.49783	0	2.25264	3.32994	2.64152	4.08328	3.08833	2.20069	2.50515	1.62774	2.61483	3.12122	3.72512	3.62661	2.47983	0	0	2.66337	2.93629	3.23706	2.16775	1.26461	4.30188	5.30065	3.28587
Atp10d	5.1693	5.43702	4.87805	5.30079	5.0774	5.42337	5.17228	4.84815	5.15014	5.5559	5.87476	4.70604	6.01063	5.34121	5.69242	5.42355	5.39699	5.35173	4.92483	3.98284	4.35821	4.98883	4.26981	5.41151	4.69895	5.54792	4.64633	4.95391	5.55096	4.43083	4.2677	4.42359	4.26559	5.67046	5.87336	4.94302
Atp11a	5.30643	4.39936	4.64974	5.0649	4.55253	6.03949	4.1108	5.48189	5.3988	3.9023	4.23671	4.94249	5.88714	4.86995	5.19452	4.81517	5.11189	5.2892	5.13633	5.69122	4.74309	4.50087	5.15605	5.25867	5.06785	4.71044	1.67162	4.7679	5.55096	4.68945	5.30003	5.90414	5.6599	4.30188	6.60045	5.48433
Atp11b	6.94248	6.99363	7.21971	7.13906	6.60613	6.64486	5.96238	6.09849	6.47483	6.62449	6.15052	5.98386	6.42007	6.6994	6.42833	6.15024	6.64476	6.28138	6.8667	7.11868	6.64299	6.82263	6.78478	7.23013	6.70979	6.63567	6.23485	6.67566	6.61617	6.2015	6.99886	7.04161	6.98072	6.12215	7.08162	6.34924
Atp11c	4.77939	5.28871	4.11728	4.46195	4.15784	5.14132	4.21174	4.38262	3.46192	4.70677	4.89914	3.6036	3.15934	3.76042	4.38698	4.51805	4.45864	4.32563	4.37736	3.83307	4.74309	4.38768	2.95207	4.76989	4.93139	4.83137	4.2912	4.7679	5.33913	4.30402	4.86273	4.64117	4.23009	4.0534	4.3368	2.64429
Atp13a1	4.34243	4.72209	3.96657	4.4008	4.60896	3.63588	4.83522	5.34761	4.05181	4.62755	4.52185	4.85251	5.14492	4.35441	4.1622	4.06348	5.18029	4.59052	4.29164	4.24252	3.75934	4.17673	3.99287	4.59849	2.81846	2.9759	4.20834	4.7679	4.73382	4.11549	4.49442	4.16728	3.61128	4.0534	3.64666	4.20995
Atp13a2	5.43164	5.55535	5.51605	5.8735	5.68789	5.28923	6.10042	6.46566	6.19691	6.11617	6.25798	6.84987	5.14492	6.35684	5.88157	6.67896	6.66877	6.50877	5.38425	5.07638	4.91953	5.69169	4.85384	4.80185	5.73381	6.02451	3.43772	5.52327	6.5188	6.14096	5.36704	5.40666	5.39724	5.83724	6.20921	6.03943
Atp13a3	5.25652	5.48893	4.69838	5.93949	5.03683	5.42337	5.60228	4.63408	4.73357	5.10793	4.68478	5.10719	5.03284	4.86995	4.9346	5.16083	4.96452	4.78432	5.25433	4.97275	4.62585	5.22682	5.37266	5.6231	5.25101	4.57843	4.36957	3.0872	5.41325	4.99332	5.15589	5.30105	4.43107	6.30409	5.67069	5.74198
Atp1a1	6.69642	7.31449	6.60598	7.54094	7.75692	7.66497	8.65436	7.58232	8.22565	8.57177	8.35081	8.36271	7.76731	7.74825	7.72995	8.08011	7.92351	7.88949	6.28051	5.8749	6.67286	7.72598	6.89391	7.2592	7.67645	7.33308	5.88072	8.28626	7.81426	8.22515	6.71362	7.06868	6.20821	8.42741	8.25018	8.08
Atp1a3	5.53295	5.75227	5.21542	5.16025	6.03543	5.5461	5.93312	5.92072	5.85235	6.38058	5.8056	5.8035	4.91131	5.86074	5.56942	5.65938	5.61036	5.87607	5.23149	6.05484	5.96151	5.27005	5.21333	5.43208	5.64932	5.97286	5.48266	5.93044	5.79229	6.05168	4.88577	5.22609	5.44447	5.26484	6.20921	5.96052
Atp1b1	2.86379	3.39539	2.40707	4.73401	3.3731	2.26614	4.00227	3.69104	2.94098	2.9957	3.58332	1.92182	3.15934	2.58994	2.54342	1.75778	4.15302	3.7762	3.4049	2.85522	2.37311	3.75799	3.2726	3.50978	3.7124	3.63759	3.1127	3.99972	4.41098	4.21283	3.08614	2.45714	1.26461	4.69852	4.80168	2.17033
Atp1b3	6.98906	7.05805	6.84077	6.97566	6.90551	7.14958	7.22881	7.52125	6.79712	7.47732	7.57376	7.33005	6.66533	7.02552	6.93482	7.49654	7.44245	7.43014	6.88145	6.94701	6.72129	6.76336	6.85844	6.93098	7.13956	6.98759	7.13838	7.52913	7.20146	7.27292	6.92851	7.06868	6.762	7.04514	7.12197	7.26026
Atp2a2	5.4904	5.43702	5.46073	6.20399	5.76442	6.27066	6.66061	6.25673	6.40073	6.38058	7.03851	6.67714	6.96927	6.28898	6.17468	6.85551	7.33403	6.95383	5.08629	4.82187	5.1351	6.05512	6.01201	6.28564	5.64932	5.86367	4.98185	6.09774	6.24206	6.06477	5.77742	5.72517	5.63297	6.93906	6.71038	6.21968
Atp2a3	6.7871	6.72446	6.77426	7.0119	7.13422	6.19765	6.15213	7.39075	6.32262	6.30621	6.25798	6.163	7.05784	6.60954	6.86182	6.22564	6.1771	5.97207	6.58076	6.41258	6.68267	7.15791	6.79732	7.31564	6.64582	6.25819	5.649	6.09774	5.95001	5.72861	6.46102	6.92203	6.65897	5.48186	5.77559	5.78842
Atp2b1	6.42992	6.59623	6.64373	6.69913	6.38158	6.8009	6.12651	6.01234	6.5624	7.10573	7.11197	6.70312	6.27979	6.5137	6.6784	7.1642	6.47815	6.62302	6.46804	6.59814	5.99341	6.21851	5.75344	6.1432	6.54419	5.86367	5.25388	6.44679	6.92568	6.57548	5.70156	5.52082	5.3149	6.05602	5.87336	6.65515
Atp2b4	2.95005	3.53362	3.26422	3.13342	2.7261	0	3.61693	3.69104	2.71503	4.3599	2.97572	2.49783	4.63242	4.0609	2.93373	3.39603	2.94788	4.05203	3.99887	2.85522	3.90065	2.86087	3.1989	3.25656	2.25816	5.54792	3.28434	4.3035	3.40643	4.65523	2.50656	2.31969	2.50472	4.51379	4.80168	4.06658
Atp2c1	6.53832	6.38418	6.40083	5.98187	5.71385	6.19765	5.31524	5.92072	5.95947	5.89724	5.76973	5.77928	6.80837	5.95132	6.08771	5.91992	5.90125	5.89018	6.10315	6.55094	5.8955	6.07963	6.02273	6.06633	6.14205	5.9193	6.37442	5.93044	6.5188	5.76116	6.62741	6.62658	6.52623	5.98672	6.76236	5.87703
Atp5a1	8.64127	8.7642	8.12875	8.84177	9.23581	8.94409	9.15343	9.10097	9.01551	9.37144	9.39348	9.56381	8.88998	9.19918	9.09156	9.52266	9.5095	9.5811	8.36424	8.20016	8.546	9.15032	8.49791	8.72986	8.92057	9.07402	9.25974	9.24881	9.5092	9.33915	8.84223	8.77528	8.67488	9.25156	9.31025	9.31
Atp5b	7.9445	8.27835	7.86675	8.22275	8.38883	8.14449	8.19347	7.48972	7.92225	8.56647	8.73715	8.60241	8.20244	8.19083	8.42334	8.72955	8.89786	8.96688	7.88997	7.68659	8.02731	8.32157	8.06941	8.20155	8.49975	8.56496	8.79669	8.52522	8.80418	8.67715	8.31082	8.29412	8.12991	8.87375	8.13661	8.69401
Atp5c1	8.59349	8.56499	8.59483	8.3353	8.96832	8.32674	8.94932	8.7875	8.7204	8.6339	8.7556	8.878	8.96825	8.65342	8.66566	8.77104	8.4348	8.77488	8.62304	8.58985	8.78579	8.5293	8.65603	8.47124	8.80815	8.79798	9.81095	8.17837	8.48134	8.88156	9.00754	8.70111	8.90053	8.76412	8.26827	8.52604
Atp5d	8.40209	8.49902	8.45673	8.37956	8.82082	8.80352	8.91231	8.46962	8.74307	8.76922	8.93632	8.91737	8.70121	8.74067	8.69537	8.94844	9.06321	9.17715	8.2063	7.95028	8.52977	8.85977	8.4688	8.74638	8.98447	8.86326	9.07037	8.43433	8.98518	8.95198	8.78977	8.53442	8.66826	9.01968	8.46929	8.6879
Atp5e	10.6943	10.8782	11.1836	9.8531	10.2961	10.0554	10.6449	10.2718	10.387	10.4079	10.4685	10.6372	10.4916	10.4217	10.3243	10.2459	10.1412	10.274	11.2775	11.5173	11.1151	10.3519	10.8008	10.4252	10.4087	10.5773	12.018	9.65657	9.66333	10.0625	11.0612	10.6197	10.9294	10.143	8.97794	10.1928
Atp5f1	10.0937	10.0002	10.2818	9.63144	9.71221	9.84439	10.0052	9.71945	9.9392	10.0035	9.88124	10.0686	9.95532	9.78075	9.87987	9.85499	9.89253	10.1013	10.0495	10.1733	10.0183	9.66933	9.94444	9.57589	9.96459	10.0354	10.9876	9.51589	9.48577	9.84345	10.4226	10	10.3441	9.55666	9.08386	9.74325
Atp5g1	6.82754	7.07513	7.20295	6.88925	6.90551	6.84938	7.16731	6.39932	6.57929	7.73523	7.54222	7.67665	6.32808	6.61878	6.82388	7.56709	7.4214	7.8285	7.00106	7.0268	7.37619	7.53542	7.22157	7.12034	6.98439	7.74074	7.869	6.5075	7.37841	7.85853	7.88591	7.44843	7.48864	7.64906	6.99738	7.24369
Atp5g2	6.45226	6.50674	6.42992	6.70547	6.77595	6.12073	6.44947	6.86027	6.19691	6.17307	6.47396	6.38786	6.58812	6.69066	6.68688	6.86143	6.72709	7.0066	6.05192	6.42572	6.90865	6.5165	6.74001	6.78669	6.64582	6.96133	7.33673	6.5075	6.34032	6.57548	6.83693	6.35479	6.45881	6.46563	5.77559	6.84287
Atp5g3	9.44429	9.31489	9.64662	9.23792	9.52325	9.46335	9.8357	9.39284	9.50545	9.63461	9.74934	10.0847	9.74465	9.32309	9.54765	9.76307	9.88614	10.0745	9.5732	9.36735	9.34205	9.2656	9.44102	9.00337	9.55112	9.98415	10.5041	9.35174	9.72829	9.90846	9.99493	9.42347	9.8891	9.81339	9.30149	9.71648
Atp5h	9.34331	9.26862	9.48619	8.73897	8.9273	9.02017	8.58078	8.50159	8.728	8.51237	8.69952	8.79589	9.05688	9.02242	8.95256	9.01637	8.84616	8.80312	9.37514	9.57918	9.48497	9.0593	9.31586	8.91114	9.08439	9.23065	10.2141	8.17837	8.4942	8.70878	9.40337	9.18579	9.36171	8.59978	8.45357	8.50534
Atp5j	10.2738	10.2822	10.4313	9.72017	9.82371	9.87983	9.97862	9.35834	9.72819	10.0536	10.0232	10.0995	9.99325	9.92743	10.0407	10.0736	10.1076	10.0194	10.207	10.2946	10.3332	9.98605	10.1913	10.0831	9.99165	10.1386	11.0092	9.50849	9.58331	9.80592	10.6325	10.2552	10.4297	9.74157	9.35325	9.58125
Atp5j2	9.25711	9.34806	9.54056	8.84033	9.01605	8.99884	9.28666	9.06932	9.13459	9.43388	9.56807	9.50411	9.25098	9.14103	9.15099	9.36066	9.39363	9.42143	9.50699	9.69903	9.70326	9.07919	9.56263	9.33091	9.29196	9.22514	10.2573	8.88692	8.96991	9.3092	9.95124	9.41506	9.70255	9.24415	8.32121	9.44295
Atp5k	9.44615	9.34101	9.62948	8.72188	9.05973	9.26319	9.21855	9.06932	8.94882	9.28373	9.52569	9.56558	9.33609	9.16489	9.12314	9.44097	9.15318	9.40186	9.51055	9.51453	9.73782	9.1003	9.50454	9.24777	9.01644	9.59756	10.2663	8.59682	8.73361	9.34319	9.9936	9.58029	9.65398	9.45127	8.61775	9.01524
Atp5l	7.3199	7.37091	7.42876	6.53806	6.91673	7.06999	7.0631	6.86027	6.70776	6.60394	6.64208	6.89565	6.80837	6.7253	6.68688	7.0181	6.71562	6.79038	7.28235	7.7969	7.44703	6.82987	7.01697	6.59933	6.88629	6.60207	7.84177	6.62176	6.3592	6.6898	7.49835	7.22604	7.33419	6.46563	5.96493	6.79818
Atp5o	9.15978	9.16074	9.09925	8.98408	9.22457	9.19917	9.37908	9.11137	9.06432	9.20747	9.50402	9.61944	9.22571	9.15698	9.17981	9.27451	9.56011	9.42749	9.26277	8.95644	9.31547	9.1314	9.19073	9.02554	9.37816	9.79264	10.3411	8.48049	9.02118	9.35656	9.65537	9.33817	9.59764	9.07915	8.6457	9.34925
Atp5s	2.95005	2.8774	2.97936	2.69784	3.3731	4.57665	3.0896	4.07788	2.71503	3.76098	2.97572	3.36411	0	3.19514	3.41405	3.32923	3.23192	3.27199	3.63116	2.85522	3.90065	3.16559	3.90289	3.34599	3.7124	4.57843	3.57635	0	2.66337	4.43083	4.04025	3.99737	2.91563	4.0534	0	3.7284
Atp5sl	4.06161	4.07644	3.79825	4.33693	4.23158	4.97649	4.39462	4.38262	4.84952	3.6043	4.1276	4.2923	3.15934	4.80666	3.83609	4.39279	4.40247	4.44516	3.55961	4.30074	3.60267	3.25437	3.99287	4.66951	4.42174	3.63759	4.36957	5.11865	4.48159	4.0111	4.2677	3.5824	4.03815	2.04288	3.64666	3.90738
Atp6ap1	7.19298	7.4603	7.36239	7.03724	7.5847	7.93583	7.54156	7.24727	7.54618	7.58607	7.37326	7.13392	7.41162	7.3864	7.38388	7.17375	7.27269	7.26126	7.51292	7.0354	7.41205	7.14055	7.09523	7.29894	7.34826	7.37347	7.6897	7.66859	7.1373	7.31737	7.03021	7.0525	7.15175	6.78429	7.56401	7.10381
Atp6ap2	7.344	7.84259	7.33188	7.94604	7.66675	6.94171	7.34448	7.3562	7.14226	7.04606	7.39696	7.36302	7.34277	7.5739	7.28682	7.30558	7.34896	7.05124	7.60909	7.32212	7.50352	8.00398	7.84317	7.92868	7.45789	7.24873	7.28712	7.2735	7.16973	7.04737	7.53524	7.5518	7.60061	6.9753	6.41805	7.41626
Atp6v0a1	5.44656	5.20842	5.24846	4.60439	5.36641	5.14132	4.00227	5.82288	4.60748	4.45474	4.23671	4.65372	5.67948	5.09855	5.0961	4.54774	4.96452	4.44516	6.05192	5.57806	5.37198	3.75799	4.30537	5.64088	5.03492	4.71044	4.36957	5.93044	5.30059	5.37613	5.30003	5.45669	4.99356	5.26484	5.87336	6.03943
Atp6v0a2	4.68192	4.77879	4.64974	4.78277	5.26469	0	5.01357	5.48189	5.32058	5.10793	5.02617	5.38907	5.75207	5.04471	5.35208	4.54774	5.36796	4.95515	4.6427	5.04265	4.85152	4.73485	4.805	4.95184	4.61233	5.0465	4.20834	4.5543	4.8977	4.96566	5.09789	4.99729	5.3484	3.37323	5.15271	5.59297
Atp6v0b	8.05811	8.01771	8.21068	7.76071	7.83588	8.1051	8.29473	8.01776	7.92885	7.72575	7.90661	8.08004	8.05242	7.90379	7.83286	7.64469	7.6068	7.33534	8.21797	8.39648	8.45726	7.66252	8.45897	8.02661	8.11488	8.33884	9.41562	7.79574	7.30243	7.51162	8.54407	8.36571	8.34432	7.35116	7.34288	7.45995
Atp6v0c	8.91902	8.92043	8.80932	8.69506	8.72833	8.71472	8.39473	8.82589	8.43503	8.31793	8.56997	8.45732	8.88191	8.80686	8.87862	8.56872	8.6278	8.58623	8.64049	8.46492	8.77436	9.13286	8.84002	8.97561	9.07024	8.51166	9.09364	8.19692	8.54866	8.40841	8.79129	8.98589	9.004	7.9874	8.3889	8.28013
Atp6v0c-ps2	8.92569	8.92985	8.82035	8.70142	8.73468	8.71472	8.40009	8.82589	8.45348	8.34294	8.59067	8.48379	8.88998	8.8109	8.89518	8.57774	8.63086	8.5884	8.64697	8.4776	8.78123	9.14016	8.85059	8.98782	9.08036	8.53856	9.0994	8.21523	8.55686	8.42374	8.79738	8.9972	9.00925	8.00503	8.3889	8.29629
Atp6v0d1	6.63264	6.85546	6.72815	6.60059	6.81245	7.02848	6.78047	6.75809	7.31358	6.5831	6.82795	6.99362	7.34277	6.9832	6.99751	6.69232	6.80498	6.90601	6.59872	6.68813	6.77735	6.55196	7.00079	6.46603	7.30058	5.31889	7.45826	5.93044	6.61617	6.85723	7.12521	7.18209	6.94831	5.75626	6.28224	7.02842
Atp6v0d2	1.69714	1.86596	1.84092	2.07091	2.24623	4.57665	0	0	2.44702	1.26017	1.24689	0.948355	1.86581	1.52746	0	1.75778	4.08328	1.72651	1.9991	2.04197	2.55516	1.71282	0	2.02008	2.81846	0	2.09713	0	2.39728	1.14397	2.62079	1.32025	2.50472	2.04288	0	3.28587
Atp6v0e	9.89392	9.85032	10.0319	9.41944	9.69275	9.5539	9.87278	9.21142	9.86709	9.75598	9.49582	9.56381	9.95532	9.71224	9.72588	9.43005	9.55368	9.44313	10.0552	10.1458	10.2113	9.84755	10.0119	9.83629	10.0013	9.93439	11.2102	9.07919	9.32706	9.65712	10.1989	10.0471	10.1345	9.12018	8.98889	9.41362
Atp6v0e2	2.33247	0	0	2.21998	0	3.10781	1.80908	0	2.94098	3.4285	2.97572	2.71766	1.86581	1.52746	0	2.74766	2.59385	2.98692	1.13685	0	1.25914	1.4375	0.56689	0.688148	2.25816	2.47983	3.43772	3.61443	2.07076	1.49305	0.554109	0	0.952392	3.75304	2.27544	2.64429
Atp6v1a	7.21492	7.42521	7.36991	7.43816	7.3729	7.43017	7.62629	7.16979	7.64577	7.39599	7.94731	7.65019	7.90102	7.40254	7.87799	7.76647	7.7821	7.58565	7.45987	6.92867	7.1891	7.6421	7.49228	7.30453	7.76444	7.6284	8.1049	6.72762	7.4059	7.22121	7.63717	7.60824	7.62131	7.40528	7.593	7.48836
Atp6v1b2	6.61953	7.02327	6.985	6.71178	7.20914	7.06999	7.5986	7.80364	7.38258	7.38399	7.34916	7.58182	7.5806	7.31995	7.40972	7.22058	7.08918	6.90601	6.51608	7.1024	7.20281	7.10518	7.0062	7.23599	7.17777	6.93458	7.93491	7.30804	7.34092	7.00043	6.87195	7.12134	6.97537	7.14395	7.40959	6.75206
Atp6v1c1	5.87918	5.52252	6.09047	5.8735	5.36641	5.5461	5.93312	6.17978	5.6751	5.71764	5.76973	5.91884	5.88714	5.58705	5.58765	5.65938	6.0549	5.6292	5.84179	6.27413	6.03999	5.6432	5.82868	6.07943	5.30724	6.21438	6.31625	6.09774	5.41325	5.67837	5.82587	6.01961	5.75039	5.14271	5.30065	5.02287
Atp6v1d	6.26302	6.67304	6.69257	6.4727	6.26349	6.69877	6.36433	6.58983	6.3816	6.81531	6.4055	6.59628	6.5479	6.16828	7.14017	5.98646	6.01799	6.07449	6.20044	6.13703	6.43799	6.67767	6.4535	6.7462	6.72019	5.97286	6.7851	7.04683	6.11456	6.47114	6.46866	6.35479	6.38809	6.70019	7.04012	6.18539
Atp6v1e1	8.23605	8.28325	8.4708	7.96465	8.18118	7.86686	7.89267	8.0397	8.04286	7.97009	8.1562	7.9559	8.33832	8.07137	8.07172	7.79769	8.10602	7.64511	8.22087	8.51497	8.48838	8.17007	8.32464	8.30554	8.23208	8.13072	8.9059	8.10168	7.75135	7.83961	8.36305	8.48102	8.34639	7.53231	7.23665	7.10381
Atp6v1f	8.31943	8.44967	8.74999	7.89151	8.29735	8.23849	8.46287	8.51732	8.42572	7.96204	7.8562	8.36678	8.49459	8.23657	8.32084	7.78216	8.16206	7.893	8.56028	8.73416	8.55404	8.12957	8.64913	8.18952	8.49371	8.55621	9.56255	7.30804	7.82108	8.15646	8.38746	8.49506	8.5089	8.03967	7.6493	8.06122
Atp6v1g1	8.66059	8.61257	9.12839	7.66966	8.31866	8.67493	8.23603	8.57855	8.51184	8.33673	7.90661	8.34632	8.35006	8.45614	8.59983	7.92191	8.05228	7.85032	9.01449	9.11898	9.00706	8.28516	8.57641	8.09271	8.72028	8.80538	10.0228	8.06175	7.70045	8.31558	8.88572	8.77857	9.1225	8.02245	7.47335	8.26379
Atp6v1g2	2.67406	2.65311	1.44445	2.47861	2.24623	4.79038	2.86007	3.69104	0	0	2.35611	1.92182	3.15934	2.73299	2.00668	1.9479	2.37784	0.657472	2.67705	0.831486	1.62774	1.09694	1.95901	2.40013	2.65474	0	1.06547	2.24769	2.66337	0	2.09688	1.9979	1.52113	0	3.11818	0
Atp6v1h	6.20281	6.27999	6.38605	6.5166	5.66145	6.12073	6.42866	6.52908	6.08307	5.59807	6.64208	6.163	6.84201	6.33457	6.3873	6.2973	6.28975	6.55379	6.26934	6.35878	6.2788	6.45227	6.24958	6.46603	6.3965	6.79285	7.33673	6.17463	6.13661	6.07775	6.76421	6.79812	6.74952	6.41377	5.96493	6.18539
Atp7a	3.31764	3.93391	4.5994	2.59238	3.61274	3.10781	3.0896	3.16087	3.72742	2.9957	2.69893	3.22759	4.46974	4.35441	4.21005	3.88892	2.94788	3.43488	4.1032	3.25923	4.14749	3.16559	4.07757	3.16121	3.0989	0	3.43772	3.99972	5.22028	3.49621	3.23706	4.16728	3.23507	5.14271	4.3368	4.20995
Atp8a1	5.89014	5.53903	5.28077	5.85081	5.22913	6.64486	4.39462	4.84815	5.19468	4.92125	5.3514	4.07077	5.03284	5.4279	5.64098	4.86319	5.27717	5.31035	5.34223	5.55433	5.41973	6.00483	5.70101	5.86923	5.2794	5.39934	3.92668	4.95391	4.79054	5.1242	5.33392	5.69769	4.92861	5.14271	6.65646	5.09854
Atp8b2	2.45554	2.06148	0	3.63622	2.24623	0	4.00227	3.69104	2.71503	4.54373	3.20786	3.07679	3.83022	4.11415	3.89582	4.32583	3.85122	3.64919	1.13685	2.29207	2.99415	2.86087	1.28923	1.15214	2.96548	0	0	4.7679	4.41098	2.54586	2.50656	3.16744	2.24498	2.04288	2.27544	4.94302
Atp8b4	7.17518	7.08641	7.43595	7.68257	6.56393	7.14958	6.29701	6.64813	6.92157	6.45129	5.94075	6.82642	6.17807	6.78399	7.03784	6.77622	7.09805	6.98046	7.08626	7.09419	7.10397	7.55303	7.35056	7.52162	7.05177	7.01339	6.19236	7.20183	7.2325	6.62053	6.64102	7.27334	7.04853	6.56408	7.27294	6.9892
Atp9b	3.94041	4.07644	4.31741	4.12639	3.91088	3.10781	3.61693	3.69104	2.71503	4.3599	4.00955	3.22759	1.86581	3.54462	4.25636	3.63604	3.76476	3.58123	4.20049	4.30074	3.96643	4.03356	3.2726	3.43021	4.1415	4.27152	2.42531	5.11865	3.40643	3.71137	3.9557	4.38965	3.90941	2.85626	4.03261	4.85848
Atpaf1	2.77204	2.52637	3.60766	4.12639	2.50602	3.10781	2.86007	0	4.23354	3.22827	2.35611	2.49783	3.83022	3.09273	3.04344	3.25918	3.76476	4.05203	3.13643	2.69078	3.51745	3.8746	3.94858	3.16121	2.47004	1.71772	1.67162	3.61443	3.25341	3.57156	3.37368	2.90446	3.30498	4.30188	3.11818	3.7284
Atpaf2	2.33247	2.9777	2.40707	3.40661	1.92915	3.63588	3.28757	2.31378	3.13628	2.37454	1.90558	3.48882	1.86581	3.54462	2.68558	3.25918	4.15302	3.64919	2.67705	2.29207	2.55516	3.41705	3.1989	3.58519	2.65474	2.47983	2.09713	3.0872	3.40643	3.04603	4.15845	3.38978	3.08417	3.75304	2.27544	4.06658
Atpif1	9.47371	9.6877	9.846	9.31971	9.40273	9.25422	9.90705	9.27754	9.23128	9.56191	9.67857	9.96636	9.47661	9.46437	9.36819	9.66659	9.72232	9.86273	10.1938	9.96177	10.1462	9.71403	9.82167	9.68275	9.7943	10.4881	10.7455	9.35174	9.6971	9.98624	10.2381	9.76869	10.0357	9.76246	9.02125	9.84562
Atr	2.77204	2.23363	2.97936	2.59238	2.24623	0	2.58698	3.16087	3.30827	3.4285	2.97572	3.07679	2.65294	3.09273	2.54342	3.39603	2.7817	3.83575	3.03456	2.85522	3.96643	2.86087	2.65411	2.02008	2.81846	3.63759	2.09713	3.0872	4.08791	2.81751	2.82526	1.9979	2.82334	4.86225	3.64666	2.64429
Atraid	6.17621	5.87439	5.97675	5.96084	6.26349	5.5461	6.60602	6.25673	5.9069	6.38058	6.8104	6.28841	5.67948	6.27736	6.54485	6.14053	6.62035	6.42401	6.30259	6.31707	6.71174	5.78405	6.46926	5.98513	6.31657	6.342	7.30717	5.83891	6.13661	5.74497	6.21041	5.96303	6.18984	5.00929	5.43483	6.18539
Atrip	3.31764	2.06148	3.96657	4.00835	3.08557	0	3.75713	0	3.30827	3.22827	3.73981	2.90837	1.86581	3.76042	2.81498	4.25561	3.09687	3.08833	2.80632	2.50515	2.71679	3.07099	3.12122	4.22691	1.32971	3.63759	2.91784	2.24769	3.67098	3.77651	3.49848	2.31969	2.61893	2.85626	3.64666	3.90738
Atrn	4.6306	4.80633	4.4369	4.54909	4.15784	4.32566	3.8849	4.07788	2.71503	3.4285	4.33815	4.07077	5.24892	3.82573	5.19452	3.97883	4.28313	4.10139	4.5349	4.51264	4.78015	4.22146	4.26981	5.1134	4.4718	3.34435	3.43772	4.7679	3.40643	4.11549	4.2322	5.14703	4.36714	3.37323	4.98785	2.17033
Atrnl1	3.44193	3.83041	2.15159	3.83425	2.7261	3.10781	4.39462	4.07788	3.72742	4.03101	5.25092	3.98866	2.65294	3.76042	4.21005	4.14343	3.35539	3.89293	3.4049	3.57449	3.1151	2.61483	2.1274	3.16121	4.07827	3.34435	3.43772	2.24769	3.67098	2.81751	2.82526	4.12664	3.55501	2.85626	3.11818	3.90738
Atrx	8.18137	8.01771	7.93937	8.28753	7.49022	7.4617	7.60789	7.48972	7.2517	7.59651	7.58412	7.54639	7.45575	7.67925	7.67561	7.88168	7.48363	7.65341	7.6002	7.85148	7.26295	7.59613	7.20284	7.88458	7.37482	7.41277	4.76705	8.04136	8.21739	7.32283	7.30257	7.41507	7.39156	8.3605	8.23186	7.50236
Atxn1	3.71259	2.65311	3.60766	3.52598	1.92915	4.32566	1.17127	3.16087	2.11758	1.26017	2.69893	3.07679	3.53343	2.58994	2.68558	2.93903	3.23192	1.72651	3.4049	3.9099	2.99415	3.9825	2.65411	3.96985	2.65474	4.08951	1.06547	3.0872	3.40643	2.93629	2.50656	3.5824	3.16159	0	4.03261	2.17033
Atxn10	8.20787	8.25605	8.38796	7.39177	7.7878	7.33123	7.33332	8.35179	7.88196	7.51081	7.39696	7.48782	8.14968	7.64799	8.1132	7.57432	7.74306	7.62837	8.27492	8.27468	8.17025	7.97488	8.19794	7.78014	8.18032	7.72522	8.76442	7.55812	7.53601	7.5164	8.30656	8.70111	8.7331	7.11176	7.47335	7.14007
Atxn1l	3.55636	3.39539	2.97936	3.27647	1.92915	3.63588	2.86007	0	2.11758	3.6043	3.88097	1.92182	1.86581	3.19514	3.04344	2.52696	1.42171	2.98692	3.13643	3.57449	2.99415	3.75799	3.34273	3.85267	2.47004	4.08951	3.28434	3.61443	2.07076	1.7739	3.37368	2.31969	2.50472	3.37323	2.27544	2.17033
Atxn2	5.41657	5.16653	4.64974	5.39788	5.19267	5.14132	4.83522	4.38262	4.39492	3.9023	5.19793	5.06775	4.46974	4.83865	4.50675	4.45678	4.92519	4.62468	4.95303	4.56108	5.01588	4.63918	4.99118	4.59849	4.85799	4.71044	4.2912	5.26649	4.48159	4.38979	4.15845	4.77866	4.15635	5.67046	6.13229	4.85848
Atxn2l	6.07426	6.45548	5.78738	6.58004	6.49073	5.76408	6.25031	7.08792	6.52801	6.35621	6.58131	6.87294	6.22983	6.46329	6.64398	6.24389	6.14322	6.41427	5.68251	6.18419	6.21257	6.21851	6.14552	6.30807	6.02956	6.16921	4.98185	6.38341	6.37783	6.25961	6.45333	6.28264	5.8473	6.18538	6.35174	5.36683
Atxn3	4.43508	4.20615	3.79825	3.78723	3.71911	3.10781	4.83522	5.48189	3.84384	4.25838	4.33815	4.80532	4.63242	4.52141	4.30122	3.79302	4.08328	4.19531	4.37736	4.51264	4.58455	4.70366	4.67512	4.36169	4.69895	4.83137	5.41036	5.83891	4.99746	4.47074	4.76674	4.55191	4.57951	5.48186	5.43483	5.53967
Atxn7	4.55003	4.20615	4.54724	4.33693	4.55253	5.28923	4.47804	6.17978	2.71503	4.03101	4.1276	3.48882	3.83022	4.70618	4.06147	3.84176	3.35539	3.94794	4.15267	3.98284	4.70506	3.56322	4.26981	4.66951	3.79337	4.43313	0	3.0872	3.99443	4.11549	4.04025	3.24542	4.76459	4.30188	4.98785	3.00046
Atxn7l1	5.37039	4.63262	5.71829	4.80654	5.22913	3.10781	5.17228	5.19954	4.90418	4.70677	4.89914	5.255	3.53343	5.15046	4.72005	4.54774	5.1465	4.78432	5.00782	5.07638	5.3226	4.90903	5.26842	5.49209	5.43892	5.0465	4.2912	5.26649	5.30059	4.75556	4.86273	4.97457	5.20947	4.51379	4.03261	5.59297
Atxn7l2	1.22993	2.38741	2.15159	1.50051	0	0	3.75713	3.16087	1.07944	2.37454	1.90558	1.92182	2.65294	2.04892	2.2086	0	2.59385	1.72651	0.677619	2.69078	0.762784	1.09694	1.28923	1.50266	0	0	2.42531	0	0	1.49305	1.26591	0.9986	2.09517	0	0	0
Atxn7l3	4.80276	4.69288	4.04389	4.46195	4.60896	4.97649	4.39462	2.31378	4.90418	5.22018	4.89914	4.35918	2.65294	4.44032	4.9628	4.86319	4.08328	4.59052	4.41839	5.10933	5.1062	4.70366	5.09641	4.70375	4.93139	5.0465	4.44389	5.11865	3.54476	4.34754	4.76674	4.87994	4.78919	4.0534	5.77559	4.57036
Atxn7l3b	8.28458	8.12002	7.90869	7.75155	7.98725	7.76944	7.38827	8.01776	7.70085	7.77253	8.03302	7.63002	8.24079	7.83011	8.03898	7.8904	7.79307	7.72995	8.0421	8.13364	8.13493	7.93515	7.95653	8.19254	8.10302	8.3286	8.74618	8.17837	7.64	7.72878	7.96645	8.15203	8.15615	7.23642	8.23186	7.45995
AU019823	4.91426	4.43509	4.87805	4.709	4.15784	5.5461	4.1108	4.07788	4.31649	5.16515	4.00955	3.70992	2.65294	4.11415	4.34474	4.3597	4.88477	3.7141	4.71033	4.51264	4.35821	4.88142	4.37395	4.27325	3.22101	4.83137	5.07834	3.99972	5.33913	3.49621	4.7417	4.77866	3.61128	4.69852	4.80168	5.17043
AU022252	3.10849	3.65975	2.97936	3.68833	2.24623	3.63588	3.0896	3.16087	1.07944	2.9957	1.24689	3.80894	0	3.29076	3.41405	2.52696	0	2.98692	2.92495	2.69078	2.86212	3.56322	3.03912	2.40013	2.65474	3.63759	3.70281	2.24769	3.99443	3.41672	3.6675	2.90446	3.71765	2.85626	0	1.45976
AU040320	4.73148	4.60152	4.83518	4.8756	4.71561	4.32566	4.21174	4.07788	5.54356	5.2732	4.68478	4.59942	5.24892	4.11415	5.12134	4.3597	4.66368	4.40641	4.95303	4.93648	4.85152	4.70366	4.75444	4.70375	4.31608	4.83137	3.1127	4.95391	4.5489	4.75556	4.30235	4.77866	4.97224	2.85626	4.58789	3.7284
AU041133	1.69714	2.52637	1.44445	2.07091	2.50602	0	1.80908	0	2.71503	1.26017	3.40777	1.92182	0	1.52746	1.49115	3.18555	2.7817	3.08833	2.80632	2.04197	2.71679	3.338	2.65411	3.34599	2.47004	2.47983	1.06547	0	2.07076	2.38808	2.09688	2.80495	2.09517	2.85626	2.27544	2.64429
Auh	4.31017	4.50398	5.11149	3.83425	4.30174	5.5461	3.28757	4.84815	4.39492	4.98619	4.23671	4.07077	4.28637	4.70618	4.25636	3.74257	4.34404	4.32563	4.5349	4.56108	4.85152	4.50087	4.50206	3.72512	4.31608	3.63759	5.12427	3.0872	4.08791	4.30402	4.43319	4.42359	4.81338	4.0534	5.43483	4.34035
Aunip	3.18163	2.52637	3.50201	2.9746	2.917	0	3.28757	0	1.68994	1.92238	3.88097	2.49783	2.65294	2.73299	2.68558	2.64152	2.59385	3.43488	3.13643	2.85522	1.92107	2.31803	2.76042	3.85267	3.62661	2.9759	2.09713	3.0872	2.39728	2.93629	4.36926	3.38978	2.61893	3.75304	4.3368	3.90738
Aup1	6.88341	6.74596	6.77426	6.80324	6.78822	6.75074	7.4412	7.2845	7.17597	7.19086	6.7004	7.34663	6.22983	7.23835	7.09629	6.71866	6.84767	6.67285	6.8667	6.98302	6.87479	7.06279	7.26737	6.87948	7.27965	7.18207	7.03397	7.08717	6.84764	7.02744	6.89484	6.92796	7.06876	6.78429	7.40959	7.12205
Aurka	5.03759	5.00954	5.11149	6.18597	5.73936	2.26614	5.06844	5.34761	5.05673	4.92125	5.19793	5.59733	5.03284	5.48965	5.43495	5.35804	5.61036	5.80336	5.20828	4.86109	5.51073	5.6432	5.53122	5.77576	5.1925	6.21438	5.44696	4.3035	5.70645	5.31167	5.66208	5.55185	4.78919	5.57924	3.64666	5.53967
Aurkaip1	6.7575	6.39329	6.92494	6.26532	6.11552	6.19765	6.49023	6.01234	6.19691	6.08686	6.64208	6.25368	6.46395	6.48366	6.12563	6.38214	6.57025	6.34424	6.59872	6.699	6.96606	6.37518	6.64607	6.42557	6.42219	6.60207	7.63522	6.24763	5.64625	6.32639	6.82506	6.68373	7.00192	5.83724	5.30065	6.00051
Aurkb	4.87069	5.58745	5.64573	6.21291	6.17281	5.9534	5.77716	5.48189	5.95947	5.32433	6.56047	5.32359	4.46974	5.86074	6.25671	6.15988	5.90125	6.3646	5.29895	4.82187	5.97755	5.75392	5.95718	6.26286	6.3965	5.54792	5.48266	5.83891	5.51775	5.59053	5.78969	5.73872	5.82368	4.0534	3.64666	6.11426
Aven	2.45554	2.76961	1.84092	3.40661	2.7261	4.32566	2.86007	0	2.71503	2.9957	3.58332	2.71766	0	2.73299	2.81498	3.18555	3.35539	3.7141	1.13685	0.831486	0.762784	2.61483	2.76042	2.94923	3.0989	3.63759	2.91784	3.61443	4.17571	4.25915	2.24674	1.5831	1.92799	2.85626	4.3368	1.45976
Avl9	4.27718	3.83041	3.79825	3.40661	3.71911	2.26614	3.8849	4.63408	3.46192	3.6043	3.73981	3.70992	3.83022	3.9481	3.77378	3.84176	3.76476	3.83575	3.99887	3.37214	3.83172	4.03356	4.50206	3.7903	3.7124	4.43313	2.69249	3.0872	3.54476	2.93629	4.2677	3.38978	4.26559	3.75304	5.67069	1.45976
Avpi1	3.03144	3.59806	2.15159	3.63622	4.08013	4.57665	3.28757	4.38262	3.95157	4.03101	3.88097	4.42309	5.24892	3.46486	3.14539	3.39603	3.23192	4.14911	3.48433	2.85522	2.71679	2.14307	3.80693	2.83028	3.43802	2.9759	4.44389	0	3.54476	3.95593	3.61333	3.08499	3.95361	3.75304	3.64666	3.90738
AW011738	1.22993	1.63974	1.84092	3.05619	3.49789	4.02161	3.75713	0	3.72742	0	1.90558	0.948355	1.86581	2.73299	2.2086	1.75778	1.81498	1.44993	2.80632	3.37214	0	2.14307	2.95207	2.02008	2.65474	0	1.67162	0	0	3.04603	1.74041	2.16775	1.92799	0	4.3368	3.28587
AW112010	6.00542	5.9627	6.56722	6.77941	7.32317	7.58134	7.85416	7.3562	7.01145	6.91875	6.91261	6.89565	6.8749	7.63439	7.05759	6.83759	6.64476	6.3646	6.38769	6.46444	6.53873	6.25123	7.15004	6.56248	6.44743	6.73202	7.75684	5.26649	5.8468	6.36925	7.16341	5.93976	6.51889	7.04514	6.28224	6.65515
AW146154	3.31764	3.15952	3.38801	2.79611	2.50602	4.32566	2.24984	3.69104	3.30827	2.7183	2.35611	2.23839	1.86581	3.19514	3.32994	2.26629	3.46913	3.43488	3.4049	3.9099	3.96643	3.92956	3.53471	2.94923	2.65474	1.71772	2.69249	3.99972	2.66337	2.93629	3.71971	2.58263	3.00236	2.04288	0	3.00046
AW209491	3.98195	3.83041	5.03779	3.27647	2.917	2.26614	3.8849	2.31378	1.07944	1.26017	3.58332	2.71766	3.15934	2.04892	3.49353	1.75778	3.35539	2.33377	4.29164	4.60795	4.49823	4.30696	4.26981	3.85267	3.53539	4.94294	5.55152	0	1.64803	3.33259	3.99859	3.80475	4.33408	3.75304	3.11818	4.20995
AW549877	3.66237	3.88309	3.79825	3.13342	2.24623	3.10781	4.47804	3.69104	2.44702	0	1.90558	3.07679	0	3.38044	3.83609	3.69029	2.59385	2.98692	3.94373	4.65335	3.75934	3.92956	3.85571	3.16121	3.33359	1.71772	3.28434	3.0872	3.89446	2.93629	3.61333	3.85537	3.55501	4.51379	3.11818	4.45993
AW554918	4.17342	3.39539	4.31741	3.78723	1.92915	0	2.24984	3.16087	2.71503	2.9957	2.35611	1.92182	2.65294	1.52746	2.93373	3.39603	1.42171	2.1583	3.4049	2.69078	3.42689	2.74309	3.2726	2.94923	3.33359	1.71772	2.42531	3.0872	2.07076	2.21091	2.24674	3.31941	3.49644	0	4.03261	2.17033
AW822252	3.25124	2.38741	2.81261	1.50051	1.52216	0	3.61693	0	1.07944	2.7183	3.40777	3.9016	1.86581	2.25264	2.68558	2.74766	2.94788	2.6313	3.13643	3.25923	1.62774	2.47405	3.1989	3.05911	2.65474	2.47983	2.69249	3.0872	2.39728	2.21091	3.23706	2.99755	2.50472	2.85626	4.03261	3.7284
Axin1	3.85355	4.69288	4.74544	4.8979	5.11685	4.32566	5.01357	4.07788	5.93343	4.62755	4.89914	5.02719	4.28637	5.15046	4.46792	4.48774	4.84318	4.72257	4.83678	4.3567	5.01588	4.46412	4.70205	5.0877	4.2602	5.31889	1.67162	4.3035	5.17838	4.54739	4.04025	4.83019	4.49229	2.85626	5.15271	3.90738
Axl	4.27718	4.32516	4.49312	4.33693	3.99798	3.10781	4.39462	4.07788	2.11758	4.45474	4.1276	3.36411	1.86581	3.82573	1.49115	3.88892	3.93279	3.7141	5.68251	5.83606	5.37198	4.79528	4.75444	4.80185	4.1415	3.63759	2.91784	5.52327	5.51775	5.55385	4.7417	4.64117	4.49229	4.0534	6.35174	6.40991
AY074887	2.0495	1.63974	3.26422	2.35508	1.52216	0	3.0896	4.07788	2.11758	2.7183	2.35611	2.23839	0	2.04892	2.68558	2.26629	2.7817	1.9585	2.92495	3.00282	2.86212	2.47405	2.76042	3.05911	3.0989	3.63759	1.67162	0	2.07076	2.81751	2.24674	1.9979	3.00236	2.04288	0	2.17033
AY358078	2.56893	3.65975	4.04389	3.68833	2.24623	2.26614	4.00227	2.31378	3.95157	4.03101	2.97572	3.36411	3.53343	2.73299	3.49353	3.69029	3.57455	4.14911	3.03456	2.04197	3.68313	3.81747	3.1989	3.25656	2.47004	3.34435	2.69249	4.5543	4.17571	3.49621	3.16357	3.521	3.49644	3.75304	4.58789	4.20995
Azgp1	3.44193	3.77574	3.26422	2.47861	4.15784	3.10781	2.86007	3.69104	2.94098	1.92238	3.40777	3.07679	3.15934	2.86313	3.49353	3.74257	3.23192	3.58123	3.55961	3.37214	2.99415	3.49199	3.94858	3.16121	3.62661	3.34435	5.0309	4.3035	3.89446	3.64316	3.7701	2.99755	3.4354	4.51379	0	3.90738
Azi2	6.13996	6.03432	6.66836	6.13993	5.9723	5.28923	5.96238	5.71793	6.30242	5.82806	5.57568	5.8738	5.34593	5.96588	5.99517	5.88546	5.75193	5.84742	5.95766	6.0206	5.80849	5.7075	5.81641	5.65845	5.75418	6.25819	5.649	6.17463	5.09075	5.22098	6.22854	5.48911	6.24425	5.98672	5.43483	6.18539
Azin1	6.45963	6.73166	7.08899	6.75518	5.81327	5.9534	6.36433	6.17978	6.85376	6.77911	6.4515	6.18159	6.66533	6.19324	6.71202	6.63815	6.64476	6.43367	7.23146	7.49417	6.90865	7.0992	6.80355	6.87198	6.78102	7.13585	7.78571	7.30804	6.70737	6.83447	6.7328	6.94559	7.30463	6.35997	6.95334	6.52408
Azin2	2.0495	1.04127	0.895917	1.90464	1.52216	0	0	0	1.07944	1.92238	0	2.23839	0	3.09273	1.14236	2.74766	1.81498	1.72651	1.76468	0	1.62774	2.31803	1.95901	2.40013	0.81292	0	0	2.24769	3.08222	1.7739	1.52258	1.5831	2.50472	0	3.64666	1.45976
B130006D01Rik	3.10849	1.04127	3.7061	0.543356	1.52216	0	0	0	1.07944	0	3.20786	0	0	3.76042	2.2086	0.562039	0	2.98692	1.13685	2.69078	2.16472	1.4375	2.41466	0	0.81292	0	1.67162	0	0	2.00889	2.50656	2.99755	2.24498	3.37323	4.58789	2.17033
B230118H07Rik	4.73148	4.56973	3.79825	5.26691	5.03683	5.28923	4.47804	2.31378	4.14554	4.54373	3.88097	3.70992	3.83022	4.2151	4.06147	4.25561	4.15302	4.24007	4.45828	4.11851	4.35821	4.82457	4.82963	5.34798	4.52018	3.63759	4.2912	3.0872	4.5489	4.84937	5.01674	4.42359	4.63485	4.0534	4.58789	5.02287
B230208H11Rik	7.03419	6.99363	7.49909	5.93949	5.9723	6.46986	5.48618	6.09849	5.64332	4.78186	5.30204	6.10572	6.01063	5.99456	6.35574	4.76551	4.92519	4.44516	7.17273	7.34305	6.95799	6.49844	6.85844	6.30807	6.2464	5.9193	7.20401	4.7679	4.41098	4.72289	7.04051	7.07937	6.79882	3.75304	3.11818	4.34035
B230216N24Rik	1.22993	3.07147	3.26422	2.21998	0	0	1.17127	2.31378	1.68994	0	0	0	0	2.58994	0	0.965476	0	1.10744	2.53505	2.50515	1.62774	2.47405	1.76835	3.05911	2.00972	2.9759	2.91784	0	1.04755	0	1.74041	2.58263	2.09517	0	0	1.45976
B230217C12Rik	2.19791	2.23363	2.15159	0.937132	1.92915	0	1.17127	0	1.07944	2.37454	1.24689	1.92182	1.86581	2.43113	2.3857	2.93903	2.7817	3.18308	1.76468	1.3556	1.62774	1.71282	2.41466	2.22258	0.81292	2.47983	1.06547	2.24769	2.39728	2.68807	3.16357	3.16744	1.92799	4.0534	0	3.52404
B230219D22Rik	5.37039	5.60324	5.11149	5.68115	5.19267	4.79038	4.77051	4.38262	4.84952	5.10793	5.14292	4.35918	5.03284	5.36338	5.01761	5.27172	4.40247	4.84354	5.50344	5.04265	5.65736	5.22682	5.59006	5.79176	5.00123	4.43313	5.5175	4.95391	4.25847	4.99332	5.05789	5.44021	5.3149	5.37743	5.15271	5.09854
B230307C23Rik	2.45554	1.63974	1.44445	2.21998	1.52216	2.26614	1.80908	0	0	1.92238	1.90558	0	0	1.17325	2.2086	2.11586	0.879325	1.44993	1.9991	2.29207	0.762784	2.96975	2.1274	2.40013	0	1.71772	3.1127	0	1.64803	0	0.953469	0.584029	0.952392	2.04288	2.27544	0
B230354K17Rik	2.67406	1.37132	3.12881	0.937132	3.3731	4.32566	3.0896	2.31378	1.07944	3.4285	2.35611	2.90837	2.65294	2.98249	1.77182	2.11586	2.94788	3.58123	3.32084	1.73922	2.37311	2.14307	1.76835	2.40013	2.47004	3.88117	2.69249	0	2.39728	3.148	0.953469	2.31969	2.50472	2.85626	3.11818	1.45976
B2m	12.5952	12.5532	12.6907	12.5673	12.834	13.3569	12.9575	12.773	12.9757	12.9412	12.5654	12.6628	12.7258	12.9923	12.7065	12.4514	12.5407	12.415	12.4846	12.5045	12.542	12.5468	12.6117	12.5613	12.8732	12.7381	13.132	12.4226	12.317	12.6568	12.3921	12.4269	12.5741	12.3128	12.5794	12.4297
B330016D10Rik	3.10849	3.983	3.50201	3.46753	3.3731	2.26614	4.5569	4.84815	3.72742	0	3.58332	3.48882	4.28637	3.88821	2.93373	2.26629	0.879325	2.75983	3.13643	3.13671	4.14749	3.338	4.23336	4.22691	2.00972	1.71772	4.64633	3.99972	3.54476	2.38808	3.91149	3.38978	3.76803	4.0534	3.64666	2.17033
B3galnt2	3.31764	3.65975	3.79825	4.04878	4.60896	0	4.39462	4.38262	3.30827	4.85324	4.00955	3.80894	1.86581	2.86313	4.68662	4.32583	4.21954	4.05203	3.4049	3.57449	3.83172	3.56322	4.11812	3.50978	4.01215	4.08951	3.1127	4.5543	4.5489	3.89857	2.82526	3.69785	3.4354	4.51379	4.58789	3.7284
B3galt4	3.25124	2.23363	2.97936	2.79611	3.23648	2.26614	2.86007	3.16087	2.94098	1.26017	1.90558	2.49783	3.15934	2.25264	3.24061	2.26629	2.12369	2.75983	3.32084	3.47686	3.51745	2.47405	2.1274	2.94923	3.53539	1.71772	3.81908	0	1.64803	1.7739	3.16357	2.99755	2.91563	2.85626	0	2.17033
B3galt6	3.25124	3.2425	4.31741	3.13342	3.08557	0	1.17127	3.69104	2.11758	2.9957	2.69893	3.48882	0	3.09273	3.41405	3.32923	3.46913	2.49019	3.48433	3.00282	3.60267	3.25437	3.12122	4.22691	1.70942	3.34435	2.91784	0	3.40643	2.68807	3.08614	3.521	3.8638	0	0	1.45976
B3gat3	4.65649	4.53723	3.79825	4.54909	5.26469	5.14132	4.95654	5.34761	5.10419	4.45474	5.25092	5.255	3.83022	4.44032	4.50675	4.21918	4.45864	4.55553	4.41839	4.82187	4.78015	4.08288	5.09641	3.96985	5.00123	4.57843	5.79812	5.52327	4.48159	4.62017	4.60958	4.31927	4.81338	4.0534	4.80168	4.34035
B3glct	2.33247	2.65311	0.895917	2.35508	3.61274	4.79038	2.24984	2.31378	2.71503	3.9023	4.52185	4.59942	4.46974	2.58994	2.2086	4.1818	3.76476	4.05203	2.67705	2.29207	2.55516	2.61483	2.27817	2.94923	3.0989	1.71772	3.43772	3.99972	4.08791	3.64316	2.38249	2.16775	2.50472	2.04288	4.03261	3.52404
B3gnt2	6.97884	7.17885	7.36991	6.76128	5.73936	5.76408	5.93312	5.19954	6.41962	5.71764	5.57568	5.91884	6.90704	5.84507	6.13805	5.42355	5.70627	5.41166	7.14244	7.26477	7.08928	7.19763	7.15979	7.01519	6.49662	6.45924	6.99742	5.93044	4.84512	5.37613	6.71362	6.87987	6.85816	5.26484	4.80168	4.34035
B3gnt5	3.10849	3.83041	3.7061	2.35508	3.23648	0	3.8849	0	3.72742	2.37454	3.40777	4.2923	2.65294	3.82573	3.32994	2.64152	3.67279	3.35573	2.92495	3.37214	2.71679	3.49199	4.11812	3.58519	2.25816	3.34435	1.06547	2.24769	2.88794	3.95593	2.91756	3.64128	3.16159	4.0534	4.80168	4.20995
B3gnt8	4.17342	4.39936	4.4369	3.96675	4.15784	4.32566	4.95654	5.92072	4.39492	4.25838	4.43292	4.8982	4.46974	4.67107	3.95318	3.97883	4.34404	4.05203	3.69933	3.13671	3.22668	3.92956	4.19596	4.07823	4.52018	4.43313	4.76705	3.0872	4.41098	3.41672	4.30235	3.80475	3.30498	4.51379	4.58789	3.52404
B3gntl1	2.56893	1.86596	3.38801	1.90464	1.92915	3.10781	1.80908	0	1.07944	1.26017	0	2.90837	0	1.17325	1.14236	1.53874	1.42171	0	0	2.29207	2.37311	2.61483	2.41466	2.5582	0.81292	1.71772	1.67162	2.24769	2.07076	2.00889	1.92963	2.45714	1.92799	0	0	2.17033
B430306N03Rik	6.61294	6.41133	6.8079	5.42885	5.83709	5.86184	4.77051	5.92072	6.15244	6.5831	5.3514	5.75465	6.22983	5.93661	6.15037	5.93122	5.81783	5.67882	6.98066	7.49417	6.88333	5.54102	6.24042	6.21618	6.14205	6.25819	4.82382	7.40697	6.30182	5.72861	6.46102	7.07937	6.69197	6.46563	7.50421	7.04764
B4galnt1	6.59965	6.59623	6.5002	7.22537	7.45216	6.75074	6.79681	6.95568	6.88127	6.91875	6.68122	6.75371	6.93849	6.88704	6.94899	7.09551	7.08026	6.89206	6.5717	6.55094	6.77735	7.5131	6.61098	7.00149	7.05998	6.93458	6.27612	7.00533	6.96318	7.00043	6.25532	6.71147	6.46646	6.78429	6.95334	6.8207
B4galt1	6.55218	6.33775	6.42992	6.28237	6.53509	6.19765	6.47	6.17978	6.36221	6.4281	6.51787	6.28841	6.01063	6.32331	6.15037	6.30601	6.1771	6.37467	6.44837	5.83606	6.71174	6.66962	6.4614	6.81829	6.2026	5.74553	6.3933	4.95391	6.50191	6.33722	6.14509	6.41508	6.3719	5.75626	6.35174	5.59297
B4galt3	5.37039	5.24912	4.83518	4.91986	4.66327	4.79038	3.28757	5.34761	4.39492	4.85324	5.30204	5.10719	5.88714	4.98878	5.74208	4.66073	4.71069	5.00787	5.88634	5.83606	5.82632	5.2486	5.6604	5.36947	5.43892	5.61684	4.64633	4.3035	4.67477	4.50957	5.22976	5.99724	5.57755	5.37743	4.03261	4.76869
B4galt4	2.33247	1.86596	2.97936	2.47861	0.953156	2.26614	0	0	1.07944	1.26017	2.69893	2.49783	0	1.81162	0.681414	2.11586	1.42171	2.49019	2.20069	1.3556	1.92107	1.71282	2.53935	1.15214	0	3.34435	2.09713	0	1.04755	3.04603	2.82526	2.99755	1.52113	2.04288	3.11818	2.64429
B4galt5	4.57739	5.38317	4.4369	5.08448	6.03543	6.84938	4.83522	6.17978	5.15014	6.40453	5.8056	6.02563	5.67948	5.66049	5.56942	6.3572	5.63494	5.90415	4.83678	5.00812	4.85152	4.53671	4.72848	4.92307	5.79408	4.08951	4.76705	5.93044	5.48375	4.99332	5.13681	4.69775	5.22759	5.37743	6.65646	6.15026
B4galt6	6.72728	7.29032	6.8299	7.38783	6.77595	7.02848	6.22639	6.01234	5.76645	6.11617	6.66179	6.12507	6.5479	6.77576	6.84676	6.99134	6.57025	6.89905	7.07989	7.14275	6.81355	7.37639	7.28083	7.43765	6.78102	6.76276	7.62727	5.26649	6.13661	6.83447	7.14921	6.60456	6.83472	6.82457	6.13229	6.65515
B4galt7	3.44193	3.93391	4.37839	4.16368	1.92915	0	4.00227	4.38262	3.95157	2.9957	2.97572	3.36411	3.15934	3.29076	3.14539	3.74257	2.7817	3.35573	3.23158	3.9099	4.40641	3.56322	3.80693	3.91245	2.81846	4.94294	4.64633	5.26649	3.78704	4.06424	4.40158	3.521	4.15635	2.85626	4.3368	3.28587
B4gat1	3.61034	2.06148	2.15159	2.9746	2.50602	3.63588	3.75713	4.07788	3.60077	4.25838	3.88097	3.9016	4.28637	2.43113	2.00668	3.93457	3.76476	3.94794	2.53505	2.50515	2.71679	3.338	3.85571	3.05911	2.81846	4.27152	3.92668	4.3035	3.08222	3.33259	3.08614	3.16744	3.08417	2.85626	3.11818	2.64429
B9d1	2.95005	2.06148	2.62404	2.59238	3.08557	4.32566	2.24984	3.69104	2.44702	2.9957	2.69893	2.71766	2.65294	2.86313	3.14539	2.84651	2.7817	2.33377	2.53505	3.37214	1.92107	1.94392	2.85942	1.78444	2.81846	3.34435	4.2912	5.26649	3.08222	2.81751	2.24674	2.69807	2.24498	4.51379	4.03261	5.02287
B9d2	4.06161	5.22892	4.74544	5.04505	4.90781	4.97649	5.40324	3.69104	5.64332	5.04834	5.4901	5.06775	5.43682	5.54888	5.43495	4.1818	5.00279	4.69067	5.52238	5.60142	5.77217	4.93612	5.13645	5.36947	5.25101	5.39934	6.00867	4.5543	4.8977	5.67837	5.4773	4.83019	5.13465	5.14271	5.15271	5.30429
Babam1	6.01546	6.40234	6.27818	6.35672	6.70004	6.40647	5.90324	6.52908	6.19691	6.70387	6.73801	7.05543	6.93849	6.28898	6.41818	6.58903	6.62035	6.49959	5.76435	5.8749	6.12886	6.5075	6.54558	6.6174	6.63487	6.76276	6.85487	6.09774	6.77921	6.21331	6.59284	6.07406	6.13331	5.83724	6.76236	6.57795
Bace1	4.31017	5.00954	4.4369	5.44408	4.76611	4.32566	2.24984	0	4.23354	2.7183	2.97572	2.90837	4.07625	3.38044	2.68558	3.63604	4.01	4.28349	4.24678	3.47686	3.42689	5.43106	4.72848	4.80185	4.42174	3.63759	2.09713	4.7679	3.54476	4.62017	3.49848	3.75229	3.61128	3.75304	2.27544	4.45993
Bach1	5.6916	5.69449	5.93677	5.71923	5.95063	5.86184	6.10042	5.34761	5.43637	5.63904	5.44533	5.38907	5.67948	5.56809	5.64098	5.40745	4.92519	4.87226	5.34223	5.66928	5.7159	4.67178	4.87766	5.28152	5.53623	5.86367	5.21196	4.95391	5.8468	5.04711	5.01674	5.1058	4.81338	6.05602	6.05104	5.78842
Bach2	3.31764	2.65311	3.12881	3.96675	3.61274	4.57665	4.95654	5.19954	4.39492	5.22018	5.19793	5.91884	1.86581	5.09855	4.9346	5.88546	6.10854	6.18164	3.94373	4.51264	4.20313	3.81747	5.54616	5.18786	4.1415	5.68262	4.64633	7.74622	6.66249	6.75589	6.63423	6.24516	6.06443	7.14395	6.35174	6.65515
Bad	5.94368	5.64959	6.22936	5.16025	6.07603	5.5461	5.84158	3.16087	5.43637	5.32433	5.76973	6.30547	6.06863	5.84507	5.93949	5.87378	5.21331	5.54251	6.14041	5.81623	6.11442	5.11273	5.82868	5.69295	5.77427	5.47554	7.04595	4.7679	5.41325	5.53515	6.40631	6.04164	6.00265	5.57924	4.58789	4.85848
Bag1	7.3199	7.41182	6.985	7.37199	6.93892	7.225	7.20453	7.4245	7.4017	7.5543	7.74976	7.47279	7.19436	7.46024	7.30346	7.69862	7.66166	7.81747	7.13014	7.0354	6.97407	7.40091	7.31175	7.2124	7.43914	7.92868	7.84862	7.84362	7.63226	7.53063	7.32381	7.49307	7.19842	7.81819	7.30833	8.03257
Bag2	1.69714	0.612609	1.44445	2.69784	2.50602	0	1.80908	0	2.71503	1.26017	0	1.51568	0	1.81162	0.681414	1.53874	2.37784	2.6313	1.76468	3.00282	2.37311	1.71282	2.41466	1.78444	1.70942	4.08951	3.1127	2.24769	3.25341	3.33259	1.74041	1.5831	2.50472	0	4.3368	3.28587
Bag3	2.86379	2.06148	3.79825	3.96675	4.4938	4.02161	4.21174	3.69104	3.13628	3.4285	3.40777	4.07077	3.53343	3.6202	3.24061	3.18555	4.15302	4.00092	1.76468	2.50515	2.99415	4.34788	3.12122	3.50978	3.53539	2.47983	2.69249	3.99972	4.17571	4.0111	2.09688	3.5824	1.52113	4.86225	2.27544	3.7284
Bag4	3.71259	3.59806	3.79825	4.577	2.50602	4.79038	2.58698	4.63408	2.94098	3.22827	3.88097	3.9016	4.07625	3.19514	3.04344	3.32923	4.61509	4.59052	3.03456	3.13671	4.02934	3.41705	4.11812	4.36169	3.22101	1.71772	2.69249	3.61443	3.78704	4.30402	3.9557	3.75229	3.30498	2.04288	4.80168	3.28587
Bag5	4.46469	3.77574	3.50201	3.87978	4.30174	4.02161	4.63168	4.07788	4.39492	3.4285	4.60561	3.36411	4.63242	4.0609	4.78468	4.32583	3.93279	4.65806	3.23158	4.11851	4.02934	4.4264	4.53238	4.22691	3.94284	4.27152	3.92668	2.24769	4.48159	3.89857	3.6675	3.24542	3.66545	2.85626	5.43483	4.57036
Bag6	6.07426	6.29951	6.17883	6.5166	6.84806	5.9534	6.92126	6.52908	6.98634	6.5831	6.8104	6.77836	5.82118	6.60023	6.74488	6.56019	6.45072	6.75226	6.25808	6.2148	6.30446	6.44286	6.33807	6.67031	6.54419	6.12257	4.82382	7.37474	6.91297	6.53841	6.22854	6.16716	6.24425	6.12215	7.47335	6.62987
Bahd1	1.48237	3.71891	2.81261	3.34301	3.49789	4.79038	1.80908	5.03452	2.94098	3.4285	1.24689	3.6036	2.65294	2.25264	2.3857	3.10797	2.37784	2.75983	1.76468	1.3556	3.22668	2.14307	2.1274	2.83028	2.47004	3.34435	1.06547	0	3.08222	2.38808	0	0.9986	1.92799	4.0534	3.11818	3.00046
Baiap2	2.77204	2.8774	2.97936	3.87978	2.7261	2.26614	3.61693	3.69104	3.30827	2.9957	3.20786	3.48882	3.53343	3.29076	3.24061	2.64152	3.35539	3.7141	3.32084	0	2.37311	3.63111	2.85942	2.94923	3.53539	2.47983	2.09713	4.3035	3.78704	3.95593	3.00431	3.75229	2.82334	4.51379	3.11818	3.90738
Bak1	4.75563	5.40135	5.21542	5.53227	5.33329	5.14132	5.26914	6.25673	5.32058	5.99516	6.28364	6.10572	5.75207	5.29584	5.79009	6.01862	6.0549	5.89018	5.23149	4.89928	5.46595	6.11562	5.26842	5.77576	5.71314	4.83137	5.07834	4.3035	5.51775	5.69531	5.43107	5.52082	5.39724	5.98672	6.13229	5.09854
Bambi	3.31764	3.59806	3.50201	2.79611	4.9951	4.97649	4.47804	3.69104	4.95684	3.22827	3.73981	3.48882	2.65294	4.70618	4.30122	3.52102	3.57455	3.08833	2.37754	3.57449	3.51745	3.92956	3.4096	3.7903	3.62661	2.9759	3.81908	3.0872	2.66337	3.41672	3.61333	3.24542	3.16159	0	2.27544	3.7284
Bambi-ps1	1.88405	1.86596	0.895917	1.90464	3.08557	0	2.24984	0	2.44702	2.37454	1.90558	2.49783	3.15934	2.43113	2.3857	2.52696	1.81498	1.44993	2.37754	2.50515	2.37311	2.86087	2.85942	2.70065	2.47004	0	1.06547	3.99972	2.88794	2.00889	3.00431	1.9979	2.91563	0	4.03261	1.45976
Banf1	8.50186	8.75716	8.68207	8.87166	9.00295	8.89874	9.23663	8.62283	8.90594	9.14128	9.18464	9.33166	9.23207	8.97822	8.83733	8.97053	9.02884	9.16994	8.61424	8.52721	8.98739	9.03758	9.09493	9.02045	8.81544	9.23065	9.73713	8.38664	8.79381	9.26022	9.29355	9.01262	9.12733	8.74326	8.65947	8.96558
Bank1	4.46469	3.88309	3.60766	5.60185	4.55253	4.79038	4.1108	4.84815	5.19468	5.16515	4.89914	4.07077	3.83022	4.44032	4.99047	4.48774	4.66368	3.7141	3.8864	3.9099	3.22668	3.8746	3.94858	4.22691	3.62661	2.47983	3.43772	3.61443	4.67477	3.77651	4.71623	3.85537	3.71765	4.0534	4.03261	4.06658
Banp	5.54686	5.16653	5.51605	5.24968	4.4938	6.03949	5.22152	4.63408	5.27982	3.6043	4.33815	4.85251	5.52232	5.22498	5.72572	4.06348	5.1465	4.10139	4.41839	5.10933	5.3475	4.38768	5.11657	5.41151	4.81985	5.39934	5.68008	5.11865	4.94844	3.24325	6.02574	5.69769	5.82368	4.51379	4.03261	4.67293
Bap1	4.65649	4.50398	3.88486	4.27011	4.30174	5.28923	4.21174	3.69104	4.73357	4.25838	4.00955	4.85251	3.83022	4.35441	4.00834	4.45678	4.80036	4.40641	4.60765	4.05227	4.54203	4.96272	4.50206	5.06153	4.36987	4.43313	3.70281	5.26649	4.73382	4.84937	4.1958	4.48918	4.462	3.37323	4.03261	5.02287
Bard1	4.34243	3.93391	3.60766	5.0649	4.71561	2.26614	3.8849	5.03452	3.72742	0	4.89914	4.8982	4.77859	4.59818	4.46792	4.83938	4.66368	4.40641	4.05198	2.50515	3.68313	5.03967	3.94858	5.21185	4.31608	4.71044	3.43772	4.5543	4.67477	3.95593	4.1958	3.90428	3.08417	4.30188	3.64666	4.06658
Basp1	4.75563	4.75072	4.87805	4.8979	5.2994	6.03949	4.1108	6.25673	5.32058	6.35621	4.75983	5.21945	4.07625	5.48965	6.13805	5.71277	5.48074	5.8182	5.44508	5.07638	5.1351	4.57168	3.99287	4.07823	4.81985	3.88117	4.87844	6.31712	5.55096	6.03846	4.88577	5.1871	5.85897	5.57924	6.05104	6.00051
Batf	4.95655	4.91151	5.07511	4.80654	4.71561	4.97649	4.83522	2.31378	5.47299	5.7554	5.69521	5.62477	5.88714	4.86995	5.17053	5.12189	5.04008	5.24596	4.98068	5.26367	5.21846	4.85328	4.96918	5.28152	4.69895	5.54792	5.71051	5.63633	4.48159	5.1242	5.21164	5.28267	5.17254	5.14271	4.98785	5.53967
Batf3	3.71259	3.88309	3.26422	3.40661	4.60896	3.10781	4.77051	3.16087	3.46192	2.37454	2.69893	3.48882	0	4.0609	3.14539	2.74766	3.23192	2.49019	4.05198	3.25923	3.51745	1.94392	3.12122	2.22258	2.81846	2.47983	3.28434	3.61443	1.64803	1.49305	3.16357	0.9986	3.00236	3.75304	0	2.64429
Bax	6.49593	6.46416	6.01566	6.87807	7.02439	6.53058	7.58925	7.16979	7.10775	8.00185	7.66444	7.96666	7.65821	7.22631	7.34155	7.45013	7.71451	7.5943	6.87409	6.45165	6.74959	6.87256	6.74001	6.35192	7.27965	7.15915	7.61123	7.30804	7.76557	7.73698	7.50952	7.15204	7.123	7.71483	6.60045	7.66052
Baz1a	8.05081	8.30272	7.807	8.27481	7.85351	7.63763	7.10306	7.4245	7.13085	7.25815	7.56332	7.15289	8.05242	7.58808	7.90003	7.62045	7.37108	7.36595	7.52236	7.51276	7.63576	7.77557	7.78138	8.10877	7.68177	6.82234	6.29633	7.64175	7.46808	7.06051	7.5206	8.08202	7.73649	7.48283	7.04012	7.35587
Baz1b	6.45963	6.70265	6.61867	7.13437	7.12457	6.58885	6.49023	6.09849	6.45666	6.33143	6.89607	6.49583	6.80837	5.96588	6.04878	6.90795	6.50507	6.52694	6.36688	6.42572	6.43799	6.74815	5.82868	6.35192	6.45989	6.45924	4.36957	6.24763	7.0117	6.30447	5.83773	5.91611	5.8473	7.07883	6.81252	6.65515
Baz2a	5.96456	5.86132	5.43225	5.56051	5.52146	5.9534	5.31524	5.03452	5.47299	5.2732	5.19793	5.7041	5.82118	5.69585	5.0961	5.65938	4.88477	5.43109	6.14041	6.03782	5.51073	5.27005	5.32148	5.16347	5.96111	4.43313	3.57635	5.93044	5.67666	4.93745	5.28278	5.68375	5.44447	5.00929	6.13229	5.48433
Baz2b	7.65775	7.37552	7.31638	7.32338	6.71297	6.40647	6.34224	7.45748	7.10775	6.76067	6.42868	6.38786	6.96927	7.35908	7.03119	6.81945	6.89932	6.89206	7.37905	7.85148	7.22985	6.83707	7.14023	7.14547	7.23687	5.97286	5.48266	7.52913	6.77921	6.95894	7.12521	7.301	7.52205	7.20625	8.01333	7.59671
Bbc3	3.89763	3.71891	3.88486	4.73401	4.43258	4.79038	5.17228	5.82288	4.39492	5.10793	3.20786	4.8982	2.65294	4.80666	4.50675	4.32583	4.15302	4.72257	4.33514	4.41057	4.08963	3.41705	4.85384	4.22691	3.94284	3.63759	3.92668	3.0872	4.73382	4.16498	4.15845	3.521	2.91563	4.51379	5.43483	5.53967
Bbip1	8.62497	8.3003	8.72379	7.66317	7.7939	8.36059	8.09781	7.55211	7.92225	8.19281	7.97907	8.00371	8.53629	8.18462	8.30165	7.94997	7.91851	8.16085	8.67264	8.93132	8.6721	8.23696	8.31377	7.89573	8.15756	8.3286	9.4017	7.7208	7.35038	8.11928	8.6804	8.56326	8.72834	8.26128	7.96979	7.68527
Bbof1	1.48237	0.612609	0	2.35508	2.24623	0	0	0	0	1.92238	0	1.51568	0	0	2.54342	0	0	1.10744	1.9991	1.73922	0.762784	0	1.76835	0.688148	0.81292	1.71772	0	0	0	0	0	2.31969	1.73885	0	2.27544	2.17033
Bbs4	2.67406	0.612609	2.40707	2.47861	0	0	1.17127	0	1.07944	2.37454	0	2.23839	0	2.25264	0	2.4025	2.12369	3.08833	3.32084	0	0.762784	2.47405	2.65411	2.02008	1.32971	2.47983	2.42531	3.61443	1.04755	2.68807	1.26591	2.31969	2.82334	2.85626	2.27544	2.17033
Bbs9	2.0495	3.59806	2.40707	4.12639	2.50602	0	1.80908	0	2.44702	0	2.97572	1.92182	0	0.70274	1.49115	1.75778	2.94788	1.72651	3.23158	2.69078	3.68313	4.17673	2.95207	4.31815	2.47004	0	0	0	2.66337	1.14397	2.09688	1.5831	2.50472	3.75304	3.11818	3.00046
Bbx	4.31017	4.85988	3.79825	5.0649	4.9951	0	4.63168	4.38262	3.95157	4.25838	4.60561	4.35918	4.28637	3.9481	4.9346	4.48774	4.61509	4.90042	3.55961	4.30074	4.20313	4.08288	3.94858	4.44502	4.2602	4.57843	1.06547	5.40059	4.73382	4.34754	3.16357	3.69785	3.71765	2.85626	4.80168	5.17043
BC002163	7.24935	7.26076	7.23628	6.88925	7.0653	6.98575	6.99392	6.46566	6.6767	7.13467	7.12622	7.19926	7.16807	7.09339	7.11526	7.14491	7.27269	7.22275	7.39968	7.308	7.29531	7.30545	7.33774	7.12034	6.87703	7.67762	8.04048	6.72762	6.86094	7.19763	7.69373	7.49706	7.35082	6.93906	6.76236	7.10381
BC003331	5.43164	5.52252	5.28077	5.8161	4.55253	5.5461	5.74384	4.63408	5.27982	5.16515	5.97265	5.42073	4.91131	5.50967	5.49412	5.35804	5.5599	5.24596	5.18469	5.2039	4.25669	5.27005	5.56094	5.28152	4.93139	5.31889	4.12042	5.40059	5.44893	5.33347	5.03746	4.58228	5.11532	5.75626	4.3368	5.53967
BC003965	4.95655	4.75072	5.31236	4.65764	3.71911	2.26614	5.22152	4.38262	4.6719	3.6043	5.08573	4.65372	4.77859	4.35441	4.30122	4.83938	4.84318	4.81424	4.83678	5.45528	4.88593	5.41189	5.37266	4.98006	4.89516	5.80581	5.649	4.95391	4.17571	5.26703	5.63515	4.58228	4.66175	4.0534	2.27544	4.67293
BC004004	6.59965	6.41133	6.70453	6.74291	6.31529	6.19765	6.76395	6.81008	6.6767	6.66473	6.75645	6.82642	6.5479	6.60023	6.64398	6.3572	6.76099	6.46229	6.76699	6.45165	7.16128	6.80804	6.5967	6.53422	6.64582	6.21438	7.6897	6.5075	6.11456	6.65558	6.88915	7.03614	6.88694	5.57924	6.20921	6.40991
BC005537	7.65454	7.46463	7.24449	7.81446	7.7939	8.04393	8.12394	7.77776	7.88196	8.51788	8.7325	7.97201	8.02338	8.07137	7.81363	8.47333	8.39577	8.37919	7.50818	7.33611	7.35792	7.93179	7.33344	7.72703	7.51273	8.02057	7.33673	7.97841	7.96972	7.801	7.6063	7.57841	7.37946	7.95148	7.90189	7.93273
BC005561	4.02233	3.983	2.15159	4.27011	4.15784	2.26614	3.61693	0	4.05181	2.7183	2.35611	2.90837	1.86581	3.19514	3.14539	3.52102	3.76476	3.7762	3.69933	3.13671	2.16472	2.31803	4.15756	3.96985	2.65474	4.27152	1.06547	3.99972	2.39728	3.57156	3.71971	2.90446	3.16159	2.04288	3.64666	1.45976
BC005624	4.55003	4.72209	4.64974	4.75859	4.76611	4.97649	4.21174	5.48189	3.95157	3.76098	4.68478	4.98546	4.07625	3.88821	4.50675	4.90966	4.21954	4.87226	4.98068	4.51264	4.666	4.85328	4.75444	4.83312	4.4718	5.23368	4.44389	5.11865	4.67477	4.72289	4.1958	4.08483	4.49229	5.57924	4.3368	5.17043
BC017158	1.22993	3.2425	1.44445	4.30391	3.71911	0	4.1108	0	1.07944	3.22827	3.88097	3.07679	3.53343	2.58994	2.00668	3.52102	3.46913	3.7141	1.76468	2.69078	3.22668	2.31803	2.85942	3.91245	3.53539	2.47983	0	0	4.25847	2.93629	1.74041	1.80535	2.24498	2.04288	3.64666	2.64429
BC017643	6.5659	6.53171	5.9569	6.45776	5.92862	5.76408	6.10042	5.34761	5.61083	6.25442	5.39913	5.85075	6.01063	5.90674	6.25671	5.56091	5.27717	5.33119	6.35636	6.46444	6.41461	6.04271	6.4535	6.26286	5.99574	6.02451	6.99742	5.74117	5.37667	5.62631	5.99429	6.35479	6.75578	6.12215	5.67069	5.59297
BC018473	5.1512	5.67968	5.97675	6.84401	6.52046	6.89629	4.70277	5.03452	5.27982	5.16515	4.00955	5.255	5.60304	4.83865	5.75826	4.45678	5.27717	4.59052	5.18469	5.07638	5.39605	5.7075	6.97894	7.4068	5.36136	4.94294	6.69667	5.11865	5.17838	6.03846	5.59379	5.66968	5.94907	5.14271	4.3368	5.42677
BC026585	2.56893	1.63974	3.12881	3.73863	2.917	0	3.0896	3.16087	3.46192	3.22827	1.90558	3.07679	3.83022	1.81162	3.04344	2.64152	2.94788	1.10744	2.92495	2.29207	2.99415	3.81747	2.95207	3.65685	2.00972	1.71772	3.1127	3.99972	3.08222	2.93629	3.43743	2.80495	2.09517	4.0534	0	3.00046
BC028528	7.1707	7.02327	7.21136	6.30758	6.96076	7.33123	7.14195	7.72457	6.82572	7.09105	6.84528	7.14344	6.93849	7.41851	6.80063	6.27084	6.40857	6.1468	7.2257	7.19741	7.05189	6.66153	7.07477	6.67894	6.94062	6.93458	7.45826	5.26649	4.79054	6.03846	7.17748	6.46484	7.00718	6.12215	5.77559	5.91938
BC029214	5.1512	5.40135	5.46073	4.54909	5.15526	4.97649	4.21174	6.52908	4.23354	5.16515	4.1276	5.02719	5.95021	4.70618	5.17053	4.88661	4.51269	4.62468	5.66557	5.71282	4.95237	5.08878	5.21333	4.98006	5.36136	5.68262	5.44696	3.99972	4.48159	5.19738	5.17471	5.75214	5.76287	5.37743	4.3368	3.52404
BC029722	4.57739	5.40135	5.03779	4.80654	5.15526	3.63588	4.63168	4.63408	5.43637	4.78186	5.19793	5.8035	4.77859	4.83865	4.42802	5.12189	5.65911	5.35173	4.60765	3.9099	5.27147	5.39246	4.47108	5.0877	5.13152	5.0465	4.93107	3.99972	4.99746	5.1242	5.07803	4.72523	4.73956	3.75304	5.43483	5.09854
BC030336	2.77204	2.76961	1.44445	2.21998	2.24623	2.26614	1.80908	0	2.71503	1.92238	0	0.948355	0	3.29076	1.77182	2.84651	2.12369	1.72651	3.13643	1.3556	3.33026	1.09694	1.28923	3.43021	2.25816	2.9759	2.69249	3.0872	3.08222	0.682524	2.24674	1.5831	2.38069	0	0	1.45976
BC030867	1.22993	2.65311	0	2.59238	2.50602	2.26614	0	3.16087	2.11758	3.76098	2.69893	2.49783	2.65294	1.81162	2.00668	2.84651	2.37784	2.49019	2.37754	0.831486	1.62774	3.25437	2.27817	2.40013	3.22101	1.71772	1.67162	0	3.25341	2.38808	3.08614	2.69807	2.50472	0	0	3.00046
BC031181	6.88341	6.78108	7.08899	6.23935	6.33215	6.46986	6.49023	6.09849	6.85376	6.11617	6.09363	6.58235	6.46395	6.5137	6.29048	5.85015	5.75193	5.99836	6.8518	6.91009	6.70211	6.30418	6.65298	6.50539	6.37035	6.82234	7.62727	4.7679	6.06943	5.95651	6.90051	6.84897	6.80486	5.98672	4.80168	6.70442
BC031361	0.923746	1.86596	1.84092	1.50051	0	0	1.17127	0	1.07944	0	1.90558	0	0	1.17325	1.77182	0.965476	2.12369	1.44993	2.53505	1.3556	1.25914	1.09694	0.972806	1.15214	1.32971	2.9759	2.42531	2.24769	2.39728	1.49305	1.52258	0	1.92799	2.85626	0	2.17033
BC035044	5.01775	4.93665	5.1816	5.64205	5.99365	6.46986	6.40753	6.09849	6.6125	5.5559	5.61663	6.0049	6.62724	6.20556	5.89627	5.78932	6.49167	6.38468	5.74835	5.96767	5.5754	6.05512	5.93466	5.49209	6.17264	6.73202	7.19328	6.31712	5.89933	6.51951	6.66784	5.59717	6.43562	5.14271	6.20921	5.96052
BC037034	5.87918	6.03432	5.69451	5.93949	6.11552	5.5461	5.17228	4.63408	5.6751	5.51247	5.25092	5.32359	5.75207	5.54888	5.89627	4.97667	5.21331	5.13182	6.02561	6.03782	5.7349	5.85674	6.00121	6.2969	5.55957	4.43313	5.68008	6.44679	5.33913	5.24419	5.82587	6.31012	5.82368	5.57924	5.87336	5.23891
BC037704	3.10849	2.38741	2.81261	2.47861	2.24623	2.26614	0	0	3.46192	2.37454	1.24689	2.49783	3.83022	1.52746	3.14539	2.4025	1.81498	2.33377	2.92495	3.13671	1.92107	2.14307	3.03912	2.02008	1.70942	4.71044	4.44389	0	0	0.682524	3.55705	2.58263	3.37167	2.85626	2.27544	2.17033
BC039966	3.03144	2.8774	5.46073	2.9746	3.3731	3.63588	4.70277	4.07788	3.30827	2.7183	4.1276	3.48882	4.63242	3.9481	3.95318	2.4025	2.94788	3.08833	3.94373	3.57449	2.86212	2.47405	2.95207	2.83028	2.00972	5.23368	4.58195	5.11865	4.08791	3.148	3.55705	3.5824	2.61893	3.75304	3.64666	3.7284
BC048403	3.61034	1.63974	2.40707	0.937132	1.92915	0	0	0	3.13628	0	2.35611	0.948355	0	1.81162	2.3857	1.53874	2.94788	2.75983	1.76468	2.85522	3.33026	2.86087	2.85942	2.70065	2.25816	2.47983	2.42531	3.61443	3.54476	3.148	2.09688	1.5831	1.52113	2.04288	3.11818	2.64429
BC048507	1.69714	2.38741	0	0.937132	2.917	0	1.17127	0	1.07944	1.92238	0	1.51568	0	0.70274	1.49115	1.2804	1.42171	2.33377	2.20069	1.3556	0	0.650307	1.95901	1.50266	0.81292	2.47983	1.67162	0	2.66337	1.49305	1.74041	1.32025	2.38069	0	0	0
BC049730	9.75854	9.6464	9.71323	8.86743	9.25362	8.98805	8.7115	9.71263	9.3319	7.89597	8.57517	8.95569	9.83097	9.25508	9.75741	7.99646	8.38495	8.14623	9.48543	9.41919	9.72599	9.37235	9.53575	9.47912	9.68448	8.79054	9.54578	8.33732	8.15934	7.93185	9.63597	10.0035	9.86688	7.91463	8.30378	7.8143
BC051226	3.31764	3.39539	2.62404	2.21998	0.953156	3.10781	3.0896	0	2.44702	1.26017	2.69893	2.23839	1.86581	2.73299	1.14236	2.64152	0.879325	2.1583	2.37754	2.29207	3.51745	1.4375	2.65411	2.83028	2.00972	1.71772	1.06547	2.24769	2.88794	0	2.38249	1.5831	2.09517	2.04288	0	2.17033
BC052040	2.86379	3.07147	2.97936	3.27647	3.81818	0	3.0896	0	4.23354	4.14917	2.97572	1.92182	4.77859	3.69201	3.04344	2.93903	2.59385	3.27199	2.37754	2.29207	2.71679	4.46412	4.07757	4.40395	4.1415	4.08951	3.57635	0	2.39728	3.89857	3.43743	3.69785	2.24498	3.37323	0	2.17033
BC055324	2.77204	4.03048	2.81261	4.4317	2.917	0	3.61693	2.31378	2.94098	1.92238	3.73981	3.48882	4.46974	3.38044	3.49353	3.39603	3.93279	3.64919	2.67705	3.00282	3.22668	3.56322	3.85571	3.65685	3.79337	3.63759	2.09713	2.24769	4.73382	4.16498	3.71971	3.64128	3.95361	4.0534	2.27544	4.45993
BC064078	3.25124	3.2425	3.60766	3.58215	4.60896	2.26614	5.26914	2.31378	4.31649	3.4285	4.60561	4.65372	4.07625	4.67107	4.68662	3.88892	4.15302	4.19531	2.37754	3.13671	2.37311	3.8746	3.99287	3.96985	3.87004	5.23368	5.16878	3.0872	3.78704	4.58423	4.55315	2.69807	4.63485	5.00929	4.03261	4.34035
BC068281	2.0495	1.63974	2.15159	2.47861	0	0	0	2.31378	1.07944	2.9957	1.24689	2.23839	1.86581	0.70274	0.681414	1.75778	2.12369	1.9585	2.20069	0	1.25914	1.09694	2.41466	2.83028	1.70942	2.47983	1.06547	0	2.07076	2.21091	2.50656	1.5831	1.26461	2.04288	0	1.45976
BC100530	9.09735	9.10639	9.4931	8.03677	9.62596	10.1358	8.74977	9.91612	9.59539	10.4358	10.6007	11.0118	11.1214	9.47331	10.5005	10.5212	10.2246	10.0178	10.1617	10.5812	10.0212	8.74764	9.52165	8.74227	9.76071	9.21961	11.4267	10.5622	10.1596	10.6809	9.82137	10.1975	10.5556	10.2796	9.97651	10.3655
BC117090	6.91593	6.72446	7.10712	5.5882	7.22728	7.63763	6.29701	7.66934	7.08427	7.74464	7.93927	8.53169	9.04248	7.15186	8.0942	8.21342	8.0012	7.76099	7.81898	8.18478	7.55253	6.57799	7.24465	6.45602	7.34155	6.56766	8.99821	8.35395	7.75135	8.18072	7.40975	7.87373	8.01466	7.96955	7.34288	7.79168
BC147527	4.55003	4.20615	4.69838	4.33693	3.81818	4.97649	5.74384	5.34761	5.43637	4.3599	3.88097	4.07077	4.28637	4.30945	4.30122	4.57682	3.46913	4.00092	4.98068	4.46251	4.91953	3.75799	3.90289	3.05911	3.87004	3.34435	4.82382	4.7679	3.40643	4.58423	2.62079	3.80475	3.95361	3.37323	0	4.45993
Bcap29	5.66634	5.66471	6.05355	5.7317	4.66327	6.58885	5.90324	4.63408	5.54356	6.47411	5.30204	5.48203	3.53343	5.82923	5.21811	5.67291	6.47815	6.06208	5.73217	5.6244	5.91228	6.16226	5.79155	6.10528	5.53623	5.68262	4.93107	5.93044	6.41438	6.45133	6.22854	5.8046	5.45988	6.51569	6.35174	6.79818
Bcap31	7.54447	7.54856	7.94946	7.33568	7.35651	7.18778	7.40967	7.04517	7.4017	7.63752	7.91484	7.65019	7.31907	7.20806	7.56036	7.55982	7.68539	7.60289	7.3894	7.51276	7.8382	7.57474	7.6107	7.57809	7.43284	7.80122	8.18834	7.64175	7.08156	7.23287	7.92813	7.80457	7.89224	7.69324	7.47335	7.22693
Bcas2	6.64562	6.70265	6.55406	6.59377	6.39769	7.84311	6.89114	6.90876	6.28192	6.90202	6.4055	6.41954	6.66533	6.56241	6.48777	6.59615	6.71562	6.49036	6.51608	6.63255	6.57081	5.81357	6.77847	6.21618	6.61273	6.45924	7.13838	6.9626	6.3212	6.72322	6.66784	6.44017	6.54802	6.46563	6.81252	6.70442
Bcas3	3.55636	2.06148	2.62404	3.34301	2.7261	3.63588	2.58698	4.07788	3.84384	3.76098	1.90558	3.98866	2.65294	2.73299	3.24061	1.75778	2.59385	1.9585	2.37754	3.25923	4.08963	3.338	2.53935	2.40013	3.7124	3.88117	1.06547	0	4.67477	3.33259	2.50656	2.90446	2.72475	0	3.11818	3.52404
Bcat2	3.55636	3.39539	3.50201	3.96675	3.23648	4.02161	4.21174	3.16087	2.94098	4.03101	4.68478	3.80894	2.65294	3.6202	4.11272	3.97883	4.01	4.32563	3.63116	3.66593	4.25669	3.69594	4.40706	4.02506	3.79337	2.9759	4.0268	4.3035	4.08791	4.0111	4.2677	3.90428	3.90941	4.86225	3.11818	4.06658
Bccip	6.01546	5.92551	5.99634	5.8622	5.15526	4.79038	6.54929	5.60473	6.10656	6.40453	6.8104	7.06548	6.42007	6.83247	6.49744	6.64503	6.51834	6.67285	6.01227	5.45528	6.03999	6.2295	6.3208	6.27429	6.70979	6.16921	6.29633	7.23811	6.2008	7.11819	6.45333	6.18706	5.98146	6.41377	6.48145	6.46812
Bcdin3d	3.18163	3.2425	3.7061	3.13342	2.24623	0	3.0896	2.31378	2.44702	2.9957	1.90558	1.51568	1.86581	3.29076	3.70865	2.84651	2.12369	1.44993	3.99887	3.75192	4.30834	3.49199	4.11812	3.58519	1.70942	0	4.44389	3.99972	2.88794	3.71137	3.16357	3.16744	3.08417	3.37323	4.80168	3.52404
Bckdha	4.87069	4.50398	4.25373	5.57442	5.73936	4.79038	5.96238	5.71793	5.3988	4.78186	4.60561	5.10719	5.24892	5.71322	5.24132	5.12189	5.27717	4.75378	4.98068	4.65335	4.25669	5.54102	5.13645	5.0877	4.4718	5.14313	5.55152	5.26649	4.79054	4.75556	4.7417	4.58228	4.462	5.37743	4.80168	4.67293
Bckdhb	2.45554	2.76961	2.40707	2.88811	3.61274	2.26614	2.24984	0	3.60077	2.37454	3.20786	1.51568	2.65294	3.46486	3.24061	3.69029	4.01	3.89293	2.20069	3.47686	2.71679	3.63111	3.53471	3.72512	3.22101	4.08951	3.81908	3.99972	4.79054	4.38979	3.61333	3.08499	3.00236	4.51379	0	1.45976
Bckdk	5.41657	5.61886	5.59525	5.6552	5.71385	5.86184	5.70973	5.71793	5.54356	5.82806	5.87476	5.96251	5.43682	5.64248	5.51332	5.54628	5.27717	5.52452	5.20828	5.57806	6.14315	6.15074	5.94596	5.86923	5.22206	5.74553	5.68008	4.7679	4.84512	5.98435	5.64868	5.7115	5.38114	5.14271	5.67069	4.94302
Bcl10	8.05081	7.79183	7.93937	7.41515	7.81204	7.98005	7.42026	7.52125	7.81222	7.57556	7.43181	7.35484	8.08088	7.78156	7.56956	7.26594	7.45631	6.98046	7.83422	7.58482	7.88147	7.30024	7.59283	7.34306	7.89859	7.54243	8.77165	7.30804	7.21188	7.59072	7.63377	7.66255	7.96693	7.01064	7.87853	7.63533
Bcl11a	4.43508	4.36274	4.37839	5.0649	4.55253	5.42337	5.44531	5.03452	4.90418	4.03101	4.75983	4.98546	4.63242	4.98878	4.46792	4.86319	4.88477	4.24007	3.76442	4.46251	4.35821	4.57168	4.64768	4.92307	4.65629	5.61684	3.81908	5.63633	5.22028	5.1242	4.40158	4.04176	4.86058	5.14271	5.15271	5.02287
Bcl2	3.61034	3.59806	1.44445	3.05619	3.49789	0	4.70277	3.16087	3.46192	4.78186	3.73981	3.48882	4.28637	3.88821	3.77378	3.69029	3.57455	4.44516	2.20069	2.85522	3.51745	2.61483	3.1989	3.7903	3.7124	3.63759	2.91784	3.61443	4.48159	4.99332	3.16357	3.08499	2.72475	4.30188	4.98785	4.06658
Bcl2a1a	5.44656	4.91151	5.67033	5.8622	6.34882	6.03949	6.49023	6.01234	6.05918	7.4197	6.06433	6.37175	4.77859	5.99456	5.3306	5.67291	6.01799	5.75791	5.48425	5.57806	5.07672	5.44998	5.77896	5.36947	5.85193	4.08951	6.31625	5.83891	4.94844	5.45783	5.26532	4.75219	5.05573	6.70019	6.60045	6.34924
Bcl2a1b	5.95416	5.60324	6.29409	6.56618	7.17217	6.40647	6.76395	6.81008	6.96078	7.48857	6.92896	6.69019	5.95021	6.36784	6.22212	6.22564	6.33546	6.2379	6.26934	6.50215	5.84393	5.67571	6.24042	5.99899	6.2464	5.23368	6.81341	6.24763	5.70645	5.97049	5.83773	5.8046	6.04413	7.60349	6.99738	6.65515
Bcl2a1d	5.67903	5.20842	5.87463	6.03315	6.687	6.27066	6.73032	6.58983	6.81149	7.54355	6.62211	6.75371	5.52232	6.33457	5.51332	6.01862	5.99918	5.94528	6.10315	6.07165	5.48851	5.43106	5.94596	5.56841	5.97853	5.31889	6.31625	6.17463	5.92489	6.15327	5.66208	5.3192	5.6465	7.14395	5.96493	6.34924
Bcl2l1	4.06161	4.20615	4.25373	3.20671	3.71911	4.97649	3.8849	0	3.72742	4.03101	3.40777	2.90837	4.07625	4.30945	4.25636	3.79302	2.37784	3.27199	4.71033	4.89928	4.20313	4.17673	4.11812	3.72512	3.79337	5.31889	4.2912	0	4.33674	4.58423	3.81878	3.99737	3.95361	4.0534	5.15271	4.45993
Bcl2l11	4.09985	3.59806	4.49312	4.0881	4.71561	4.02161	4.63168	5.34761	5.36022	4.98619	3.73981	4.8982	4.77859	4.30945	4.81593	4.68764	4.40247	4.84354	4.57173	4.65335	4.81628	3.9825	4.43943	4.12951	5.1925	4.08951	4.87844	4.3035	5.22028	4.06424	3.37368	3.24542	4.36714	5.14271	4.3368	4.57036
Bcl2l12	4.20884	4.69288	4.11728	5.17858	3.99798	4.79038	5.35991	5.48189	4.84952	4.92125	5.25092	4.94249	4.28637	4.80666	4.9346	4.81517	5.04008	4.65806	4.71033	4.51264	5.21846	5.18226	5.11657	5.34798	4.93139	5.86367	4.82382	3.61443	4.73382	5.71205	5.1933	5.01965	4.55102	5.57924	3.64666	4.34035
Bcl2l13	5.83453	5.16653	4.64974	5.48885	4.9951	4.57665	4.39462	5.82288	5.19468	5.37372	5.44533	5.14559	5.03284	5.48965	5.82124	5.40745	5.5599	5.41166	5.71581	5.17306	5.67714	5.9394	5.77896	5.56841	5.90755	6.342	5.21196	6.09774	5.22028	4.87933	4.97439	5.1871	5.51991	5.26484	5.96493	5.30429
Bcl2l15	2.77204	3.39539	4.11728	3.05619	1.52216	0	3.46163	0	2.11758	0	1.24689	0	0	1.81162	2.81498	0	0	2.6313	1.9991	4.24252	3.33026	3.25437	3.03912	2.94923	1.32971	2.47983	2.42531	2.24769	2.07076	2.21091	1.26591	2.58263	2.61893	0	2.27544	3.00046
Bcl2l2	3.66237	2.8774	0.895917	3.63622	2.917	0	2.24984	4.07788	2.94098	1.92238	3.20786	2.71766	3.15934	3.69201	2.68558	2.93903	3.23192	3.83575	3.55961	1.73922	2.71679	3.81747	2.95207	3.50978	3.43802	1.71772	1.06547	0	3.99443	3.64316	3.86588	1.5831	2.61893	4.0534	3.64666	0
Bcl3	4.09985	3.88309	4.69838	4.33693	5.9723	5.14132	4.00227	4.07788	5.00765	5.22018	5.30204	5.67814	3.83022	5.36338	5.47467	5.37469	5.2456	4.55553	4.1032	4.24252	3.22668	4.46412	3.99287	3.58519	5.33456	4.27152	3.1127	6.31712	5.61518	5.67837	5.67537	6.07406	5.7875	5.00929	5.77559	5.64437
Bcl6	5.71643	5.48893	5.21542	4.75859	4.90781	5.42337	5.01357	4.38262	5.15014	5.10793	5.53352	4.42309	4.77859	4.63509	5.47467	4.95468	4.96452	5.15538	6.07776	5.7341	5.44302	5.43106	5.38932	5.16347	5.71314	5.23368	4.2912	6.09774	5.30059	5.55385	5.50732	5.96303	5.50514	3.37323	6.48145	5.78842
Bcl7a	2.19791	3.2425	0.895917	2.79611	2.50602	0	1.17127	2.31378	1.68994	1.92238	2.35611	1.51568	3.15934	2.04892	1.14236	2.52696	3.09687	2.49019	2.92495	2.29207	3.42689	1.4375	3.12122	2.70065	1.70942	2.47983	1.06547	0	3.25341	3.33259	2.62079	1.9979	2.61893	2.85626	3.11818	2.17033
Bcl7b	5.23949	5.55535	5.31236	5.56051	4.9951	4.57665	5.40324	5.19954	5.76645	5.42146	5.87476	4.8982	5.34593	5.62424	5.53226	5.68632	5.70627	5.37198	4.92483	4.86109	5.5754	5.95272	5.3558	5.91379	6.15743	5.31889	5.16878	3.0872	5.8198	5.09896	4.86273	5.42353	5.20947	6.24595	4.80168	4.45993
Bcl7c	4.02233	3.39539	3.88486	4.04878	4.23158	4.32566	4.47804	5.03452	4.23354	4.25838	4.00955	4.22217	3.15934	4.16551	4.34474	3.57968	3.85122	3.83575	3.32084	3.00282	3.51745	4.22146	4.11812	4.36169	3.33359	3.88117	4.0268	3.61443	4.48159	4.16498	3.71971	3.85537	4.07864	3.75304	2.27544	4.67293
Bcl9	3.03144	3.83041	2.40707	3.05619	1.52216	3.10781	2.86007	3.16087	2.71503	3.4285	0	1.92182	2.65294	2.04892	2.3857	3.52102	1.42171	1.9585	3.13643	3.13671	2.99415	3.8746	1.95901	2.40013	2.47004	3.34435	2.91784	4.3035	3.25341	2.38808	2.24674	1.80535	2.09517	2.04288	3.64666	1.45976
Bcl9l	3.03144	2.8774	2.15159	2.47861	2.50602	0	1.80908	2.31378	2.11758	0	1.90558	2.71766	3.83022	1.17325	2.00668	0.562039	2.7817	2.33377	2.80632	2.50515	2.55516	1.71282	2.85942	2.22258	2.96548	0	1.06547	3.0872	2.39728	2.54586	1.74041	1.80535	0.952392	0	4.03261	1.45976
Bclaf1	6.51728	6.52343	6.44426	6.65398	6.42937	5.86184	6.47	5.60473	5.85235	6.83307	6.51787	6.27115	6.32808	5.87623	6.31256	6.84956	6.33546	6.85656	6.10315	5.96767	5.91228	6.05512	5.96832	6.26286	5.90755	6.21438	4.44389	6.56576	6.91297	6.71494	6.14509	5.68375	5.87055	6.9753	7.04012	7.10381
Bcor	4.46469	4.72209	4.87805	5.0649	4.86211	5.5461	5.26914	4.63408	4.84952	4.92125	5.3514	4.70604	5.67948	4.86995	4.11272	4.48774	5.21331	4.65806	4.83678	4.82187	4.30834	5.50529	4.99118	4.98006	4.78066	5.74553	5.21196	5.93044	4.48159	4.38979	4.04025	4.61202	3.76803	4.0534	4.80168	5.02287
Bcorl1	2.56893	3.07147	2.81261	3.05619	1.92915	0	2.58698	0	2.44702	1.92238	2.35611	1.92182	3.15934	2.43113	2.3857	2.93903	0	1.72651	2.67705	2.85522	3.1151	3.07099	2.95207	3.05911	2.47004	2.9759	1.67162	2.24769	0	2.81751	3.08614	2.69807	2.38069	4.30188	2.27544	2.17033
Bcr	3.61034	4.03048	1.84092	3.96675	3.71911	3.63588	4.00227	0	2.71503	3.76098	2.97572	3.9016	5.14492	3.38044	3.89582	3.69029	3.23192	2.98692	2.37754	3.75192	1.25914	4.22146	3.53471	4.07823	3.87004	2.9759	1.67162	0	4.17571	3.148	2.38249	3.16744	3.61128	0	4.03261	2.64429
Bcs1l	4.31017	3.65975	4.5994	4.33693	3.71911	5.28923	3.75713	4.07788	4.46931	4.92125	4.1276	3.70992	2.65294	4.56031	4.87649	4.6333	4.96452	4.48289	4.29164	3.83307	4.70506	4.53671	4.47108	3.85267	4.01215	4.27152	4.44389	3.0872	4.17571	5.14901	4.71623	4.99729	4.73956	4.0534	4.58789	5.17043
Bdp1	6.00542	5.70916	5.62071	5.88471	5.15526	4.02161	5.06844	4.38262	4.90418	5.42146	5.30204	4.98546	5.75207	5.38521	4.9628	5.40745	4.96452	5.48787	5.8568	5.64701	4.81628	4.90903	4.82963	5.18786	5.36136	4.43313	4.20834	5.26649	5.61518	5.22098	4.81553	4.99729	5.19113	5.14271	5.96493	5.74198
Becn1	6.38417	6.42916	6.07213	6.40423	6.2279	6.40647	5.74384	6.01234	5.79565	5.89724	5.87476	6.02563	6.17807	6.24191	6.24527	6.34034	6.073	6.135	6.30259	6.27413	6.17132	6.41424	6.2767	6.41528	6.3302	5.9193	6.58614	6.01651	6.24206	5.99807	6.23752	6.52861	6.19906	5.91391	6.13229	6.07733
Best1	3.18163	2.76961	1.84092	1.50051	0	0	1.17127	0	1.68994	2.7183	0	1.92182	2.65294	0.70274	2.00668	1.2804	2.7817	2.75983	3.32084	3.75192	3.68313	1.09694	2.76042	2.02008	3.7124	3.88117	2.09713	3.99972	2.39728	3.49621	1.74041	2.16775	2.09517	2.85626	4.03261	4.06658
Bet1	6.35285	5.73804	6.12646	5.97139	5.60707	5.14132	6.38609	5.03452	6.05918	6.30621	5.8056	5.8965	6.06863	6.22989	5.56942	6.14053	5.92138	6.27064	5.79583	5.7341	6.21257	6.2295	6.4614	6.19226	5.79408	6.53242	6.77073	5.26649	5.13523	5.66122	6.72004	6.36356	6.39612	5.00929	5.43483	6.25318
Bet1l	5.77668	5.60324	5.83166	4.82993	5.22913	4.02161	4.5569	5.19954	5.10419	5.16515	4.75983	4.70604	4.46974	5.15046	5.30879	5.08187	4.80036	4.69067	5.94367	6.27413	5.94529	5.03967	5.87674	5.6231	5.41353	4.83137	6.3359	5.26649	5.04486	5.04711	5.73999	5.69769	5.39724	4.86225	4.98785	5.53967
Bex1	0	1.63974	0.895917	2.35508	0	2.26614	0	2.31378	0	0	1.24689	2.71766	0	0.70274	0.681414	1.2804	0	1.44993	1.13685	0.831486	2.16472	0	0.972806	1.15214	0	1.71772	0	0	1.64803	3.41672	0.953469	0	0.952392	2.04288	2.27544	1.45976
Bex3	5.33876	4.66306	6.27818	5.75632	6.20977	7.02848	6.82895	6.32979	6.05918	6.38058	5.97265	5.82732	5.43682	6.15564	5.88157	6.24389	6.51834	6.60602	4.98068	4.65335	5.80849	5.84249	5.59006	5.41151	6.2464	6.87955	6.17064	6.24763	6.67761	6.79571	6.18277	5.52082	6.19906	6.41377	6.13229	6.03943
Bex4	1.48237	2.65311	1.44445	0.543356	2.917	3.63588	3.0896	3.69104	2.71503	0	0	0	0	1.17325	0	0	0	2.33377	2.37754	2.50515	3.75934	0.650307	1.28923	1.15214	3.53539	4.08951	2.42531	2.24769	3.67098	4.21283	0.953469	1.32025	2.91563	3.37323	3.64666	4.20995
Bex6	4.34243	3.59806	4.11728	4.75859	5.68789	5.14132	6.04678	6.32979	5.95947	4.62755	4.52185	5.255	4.63242	5.89157	5.72572	4.99833	4.5648	5.15538	4.20049	4.41057	4.58455	4.22146	5.46987	4.98006	4.61233	5.54792	5.649	6.56576	5.37667	6.27096	5.28278	4.48918	5.3149	5.14271	5.77559	5.17043
Bfar	4.99764	5.76636	5.31236	5.7317	5.95063	5.5461	5.56461	4.63408	5.85235	6.28055	5.87476	5.85075	4.28637	5.5294	5.3306	6.03967	5.50761	5.56027	5.92955	5.55433	5.39605	5.33255	6.05442	5.97114	5.33456	5.54792	5.41036	6.56576	5.76424	6.01166	5.7273	5.62661	5.4289	5.00929	6.28224	5.09854
Bhlhb9	2.0495	2.9777	2.40707	3.63622	3.08557	0	2.58698	3.16087	2.94098	1.26017	1.90558	2.90837	2.65294	3.46486	3.04344	1.53874	4.15302	3.27199	2.67705	1.3556	2.37311	3.49199	2.76042	3.72512	3.0989	2.47983	3.57635	0	1.64803	3.04603	2.72664	2.80495	3.30498	4.0534	0	3.90738
Bhlhe40	5.94368	5.12339	4.91967	6.64741	6.49073	7.06999	6.76395	6.90876	6.52801	6.4281	4.83116	5.255	5.95021	6.41104	6.16258	4.90966	5.27717	3.94794	4.24678	5.26367	4.666	5.08878	5.84085	5.18786	5.77427	5.61684	4.36957	5.83891	5.51775	4.16498	4.95274	5.59717	4.86058	4.30188	4.98785	4.57036
Bhlhe41	1.48237	1.04127	1.44445	1.71668	2.7261	4.57665	3.8849	3.69104	3.72742	4.03101	5.73295	2.49783	1.86581	2.98249	5.17053	2.11586	0.879325	2.75983	2.53505	1.3556	0.762784	2.31803	3.99287	4.22691	2.25816	9.44482	3.57635	3.61443	3.08222	3.89857	4.08073	2.69807	4.52195	3.37323	2.27544	3.28587
Bicd2	4.24342	4.77879	3.96657	5.31743	4.30174	4.32566	4.1108	5.34761	4.05181	4.92125	5.14292	4.59942	4.77859	4.63509	4.87649	4.66073	5.07643	4.65806	4.33514	3.75192	3.42689	4.38768	4.72848	4.7372	4.36987	3.63759	3.43772	3.61443	4.5489	4.21283	4.1958	5.08474	4.49229	5.57924	4.3368	3.28587
Bid	6.41483	6.50674	6.37113	6.27387	6.54958	6.75074	6.64264	6.46566	6.81149	7.12028	6.75645	7.12434	6.70244	6.76747	6.82388	6.95856	6.97828	7.10063	6.82153	6.86256	7.16128	6.7784	6.4535	6.56248	6.84889	7.61161	7.10441	6.09774	6.77921	7.19167	6.82506	6.91609	6.79275	6.35997	6.35174	6.8647
Bin1	4.93556	5.61886	5.31236	5.70665	5.92862	5.86184	5.6748	5.34761	6.17484	5.71764	5.87476	6.40379	4.07625	5.34121	5.37325	5.6996	5.70627	5.97207	5.46479	4.97275	5.94529	5.7075	5.6876	5.25867	5.22206	5.74553	5.61723	5.26649	5.89933	6.06477	5.26532	5.28267	4.90629	6.12215	5.96493	5.09854
Bin2	7.8579	7.6809	7.89311	8.02922	8.37262	8.66141	8.18729	8.01776	8.58894	8.02522	7.8732	8.18516	8.33832	8.43536	8.40547	8.05448	7.99646	7.94124	7.82662	8.01692	7.44126	7.7979	7.90821	7.83524	7.99161	7.35342	6.85487	8.73017	7.91974	7.74107	7.7228	7.85208	7.82541	8.31881	8.26827	7.98351
Bin3	7.49152	7.60845	7.76765	7.33568	7.29764	7.14958	7.61712	7.32079	7.68532	7.62738	7.28709	7.67665	7.88497	7.31995	7.61914	7.13027	7.6068	6.82017	7.56866	7.61382	7.88997	7.49955	7.79082	7.55483	7.6711	7.61161	8.6156	7.49955	7.09288	7.23287	7.65068	8.08732	7.89791	7.14395	6.65646	7.20997
Birc2	3.66237	4.32516	4.25373	4.00835	3.23648	3.10781	4.00227	4.07788	3.72742	2.7183	3.58332	2.49783	4.46974	3.6202	4.75272	3.25918	3.09687	3.83575	4.24678	4.3567	3.90065	3.49199	3.75644	3.25656	2.25816	3.63759	4.58195	4.3035	2.07076	3.33259	4.43319	3.80475	4.43107	3.75304	3.64666	4.76869
Birc3	5.72868	5.52252	5.69451	5.41345	5.5791	5.76408	5.60228	5.71793	5.73664	5.67888	4.89914	5.54083	4.63242	6.15564	6.02222	5.67291	5.18029	5.46919	6.16472	6.03782	5.51073	4.30696	5.50087	5.18786	5.33456	5.54792	5.76951	6.17463	5.41325	5.60853	5.03746	5.30105	5.54902	6.30409	6.71038	5.36683
Birc5	8.19689	8.38721	8.38053	8.89264	8.69938	8.25658	8.8666	8.4857	8.56793	8.53426	8.41607	8.5497	8.6065	8.71073	8.71208	8.66668	8.60309	8.65809	8.3721	8.21915	8.57528	8.71868	8.82173	8.68985	8.5443	8.84901	9.0733	8.19692	8.08759	8.23677	8.93071	8.76208	8.60557	8.27587	7.67664	8.48434
Birc6	6.28808	6.57237	6.30983	6.40423	6.52046	6.89629	6.73032	6.75809	6.64496	6.64475	6.97694	6.70312	5.95021	6.31196	6.27931	6.64503	6.93934	6.68099	6.60761	6.46444	6.26579	6.16226	6.26772	6.6441	6.23195	6.63567	6.29633	6.72762	6.90014	6.40058	6.66784	6.18706	6.46646	7.23642	7.27294	6.40991
Bivm	3.61034	3.39539	2.81261	3.92392	1.92915	3.10781	3.0896	2.31378	2.11758	0	2.97572	1.51568	1.86581	3.19514	4.11272	3.84176	3.35539	2.98692	3.48433	2.29207	3.33026	4.03356	3.03912	4.27325	2.25816	2.47983	3.43772	3.0872	2.07076	3.49621	2.50656	3.24542	1.92799	0	3.64666	1.45976
Blcap	4.46469	4.03048	4.74544	3.68833	3.61274	4.79038	3.61693	2.31378	3.95157	4.78186	3.88097	3.98866	4.28637	3.09273	4.1622	4.02178	2.94788	3.50991	3.48433	4.18185	4.35821	3.69594	4.26981	3.58519	4.31608	4.27152	5.0309	3.0872	4.8977	3.77651	4.43319	4.35489	4.15635	5.37743	3.11818	3.00046
Blm	3.85355	4.75072	4.11728	4.65764	3.3731	2.26614	4.00227	0	3.30827	4.25838	4.23671	3.22759	4.63242	4.35441	3.56886	4.14343	4.15302	3.50991	4.33514	3.66593	3.68313	4.60582	3.59342	4.02506	3.0989	0	3.43772	4.7679	4.73382	4.38979	3.49848	3.45689	4.03815	5.14271	4.3368	5.09854
Blmh	5.05716	5.79414	5.21542	5.93949	5.60707	4.97649	6.04678	5.71793	5.98505	6.38058	6.00386	6.08611	6.06863	5.79703	5.65833	6.07067	5.9608	6.03693	5.46479	4.86109	5.7349	6.27264	5.80404	6.1432	5.10004	5.9193	6.31625	5.74117	6.53549	6.36925	5.73999	5.83014	5.51991	5.57924	6.81252	6.43931
Blnk	2.33247	2.23363	3.26422	2.59238	3.49789	2.26614	0	0	1.68994	2.7183	2.35611	1.92182	0	2.04892	0	2.4025	0.879325	1.9585	2.92495	3.25923	2.16472	1.94392	2.1274	1.78444	1.70942	2.47983	2.42531	3.0872	3.89446	3.57156	2.50656	2.69807	1.92799	4.51379	3.11818	3.52404
Bloc1s1	8.19026	8.33853	8.60124	7.95138	8.17185	8.54849	8.45774	8.46962	8.56793	8.17202	8.04807	8.40289	8.1763	8.49931	8.37169	7.79769	8.0972	7.81747	8.46803	8.86051	8.65475	8.1899	8.48052	7.98893	8.44127	8.17709	9.36391	7.52913	7.60089	7.75325	8.53499	8.27333	8.73627	7.89585	7.7557	8.16165
Bloc1s2	6.67758	6.51511	6.48642	6.68637	6.85973	7.225	7.65346	6.64813	7.23046	6.86796	6.60186	7.2174	6.8749	7.04622	6.90606	6.6587	6.80498	6.76763	6.79062	6.91941	6.83131	6.59509	6.63912	6.5437	6.53245	7.11218	7.48491	7.08717	6.53549	7.21535	7.22793	7.0525	7.08376	6.9019	6.28224	6.55126
Bloc1s3	3.25124	2.38741	3.26422	2.07091	2.24623	2.26614	3.46163	3.69104	3.13628	1.92238	2.69893	3.36411	0	2.25264	2.68558	2.52696	3.09687	1.9585	2.80632	3.13671	2.55516	2.47405	3.12122	2.83028	3.53539	4.27152	3.1127	0	2.66337	1.7739	2.24674	2.99755	2.24498	3.37323	3.11818	2.17033
Bloc1s4	4.02233	4.60152	5.14697	3.78723	4.60896	4.97649	4.21174	3.69104	5.10419	4.45474	4.1276	4.35918	4.46974	4.39801	4.6524	4.02178	3.85122	4.36658	4.05198	3.57449	3.90065	4.70366	3.47351	4.17903	4.31608	1.71772	3.57635	2.24769	3.78704	4.0111	3.7701	3.95158	4.19369	3.37323	4.58789	3.00046
Bloc1s5	3.55636	3.59806	2.15159	3.05619	1.52216	0	2.86007	3.69104	1.68994	2.37454	2.69893	3.9016	3.53343	3.19514	3.49353	4.29115	3.76476	3.18308	2.80632	3.00282	2.71679	4.30696	2.95207	3.50978	2.47004	2.47983	2.69249	3.0872	2.88794	3.148	3.23706	3.08499	2.91563	3.75304	4.03261	3.52404
Bloc1s6	5.93313	5.57149	5.93677	5.23223	5.95063	4.97649	5.35991	6.25673	5.57758	5.51247	5.65646	5.56936	6.32808	5.50967	5.28665	5.37469	5.72928	5.24596	5.46479	6.07165	5.7349	5.79888	5.54616	5.47236	5.33456	3.63759	6.14858	4.7679	5.41325	5.83945	5.57973	5.91611	6.01313	5.83724	5.67069	5.64437
Blvra	5.47593	5.58745	5.71829	5.30079	5.22913	5.76408	5.56461	5.71793	5.76645	5.96325	6.23185	6.23599	5.75207	5.99456	5.28665	6.27084	6.33546	5.67882	5.78017	5.81623	5.86132	5.59301	5.88851	5.69295	5.60514	6.02451	6.14858	6.24763	5.95001	6.10337	6.23752	5.42353	5.54902	6.46563	5.55758	6.94888
Blvrb	6.82183	6.66554	6.88347	5.89583	6.93892	7.43017	7.35555	6.01234	7.03614	6.56195	7.18186	6.9509	5.75207	7.13907	6.13805	6.09098	6.24254	5.95874	8.24672	8.14957	7.98429	6.32482	6.55299	6.5902	7.83307	8.98557	8.48088	7.61441	7.4059	8.54319	6.2195	6.38955	6.84649	8.31881	8.01333	7.44553
Blzf1	3.50028	3.15952	3.38801	3.52598	3.61274	4.02161	3.61693	2.31378	1.68994	0	1.90558	1.92182	1.86581	2.86313	3.24061	3.18555	2.7817	2.6313	3.03456	1.3556	4.70506	4.08288	3.12122	3.58519	2.65474	2.9759	1.67162	3.99972	2.66337	2.00889	2.82526	3.38978	3.30498	2.85626	4.03261	3.28587
Bmi1	2.95005	3.39539	2.62404	3.73863	2.917	0	3.46163	0	4.05181	4.54373	3.20786	3.36411	3.83022	3.46486	2.54342	3.45988	3.46913	3.35573	4.15267	3.57449	2.37311	3.16559	2.76042	3.72512	2.47004	4.08951	2.69249	3.99972	4.08791	3.24325	3.43743	3.64128	3.37167	2.04288	4.03261	3.52404
Bmp2k	5.11432	4.98565	4.87805	5.0649	5.36641	4.02161	4.30608	4.63408	4.95684	4.98619	4.23671	5.06775	5.14492	4.39801	5.19452	5.32413	5.39699	5.08351	5.00782	4.46251	4.88593	4.08288	4.61971	4.56163	4.78066	4.71044	4.36957	4.7679	5.13523	4.87933	4.7417	4.42359	4.71409	4.51379	6.05104	5.17043
Bmpr1a	4.34243	4.36274	4.54724	3.63622	3.23648	2.26614	2.24984	4.07788	2.44702	2.7183	2.35611	3.07679	4.07625	3.76042	3.70865	3.02597	2.59385	3.08833	3.94373	3.98284	3.42689	2.96975	4.07757	3.91245	4.31608	2.9759	4.70795	3.0872	3.89446	3.33259	4.08073	4.2068	4.66175	3.75304	4.3368	3.00046
Bmpr2	4.82576	4.88592	5.14697	4.46195	5.11685	4.79038	4.63168	4.38262	4.79271	4.62755	4.83116	2.23839	4.28637	4.35441	3.70865	4.60534	4.71069	4.81424	4.41839	5.2039	4.49823	4.08288	4.37395	4.76989	4.1415	5.23368	3.70281	4.7679	4.48159	4.0111	4.33619	4.64117	4.23009	3.37323	4.80168	4.20995
Bms1	5.11432	4.60152	5.07511	5.99227	5.0774	5.6592	5.31524	5.03452	4.90418	5.79219	5.30204	5.10719	4.28637	5.04471	5.21811	5.76425	5.2456	5.97207	4.29164	3.9099	4.02934	5.31202	4.15756	4.80185	4.56699	3.34435	1.06547	5.63633	5.9747	5.37613	3.6675	3.90428	3.30498	5.67046	5.96493	5.17043
Bmt2	5.30643	5.03304	4.79101	4.33693	3.99798	5.14132	4.5569	4.63408	3.95157	4.78186	4.1276	4.54301	5.03284	5.17573	3.89582	4.79055	4.5648	4.90042	5.23149	5.2039	5.21846	4.63918	5.05524	4.83312	5.13152	2.9759	5.58475	5.26649	4.73382	5.1242	4.90844	4.87994	5.0353	5.57924	5.55758	5.23891
Bmx	7.332	7.22039	7.16018	5.66824	6.28097	6.89629	6.3198	6.81008	6.96078	6.62449	6.12236	5.8738	6.84201	6.44261	7.11526	6.3488	5.72928	6.68909	7.51765	7.64786	7.38223	6.61199	6.93988	7.06214	7.17777	6.87955	7.52826	7.46934	6.73654	6.94484	7.28102	7.34151	7.55829	6.46563	7.04012	6.70442
Bmyc	5.18717	4.32516	4.31741	4.75859	5.86052	4.57665	6.44947	5.92072	6.17484	5.67888	5.39913	5.51173	5.43682	6.5137	5.62342	5.88546	5.48074	5.46919	4.15267	4.60795	4.54203	5.01447	4.87766	5.21185	5.38768	5.80581	5.07834	5.52327	5.76424	5.86962	5.09789	4.28274	5.3484	4.30188	4.98785	5.48433
Bnip1	3.80808	3.15952	2.97936	3.73863	3.91088	2.26614	2.58698	2.31378	3.30827	3.4285	4.00955	3.9016	4.07625	4.0609	2.68558	4.88661	4.40247	3.7141	3.23158	3.25923	3.68313	4.17673	3.94858	3.91245	4.07827	3.88117	4.12042	3.99972	4.17571	4.21283	3.30699	3.95158	3.76803	4.51379	4.03261	4.34035
Bnip2	7.32394	7.21012	7.39964	6.92769	7.12457	6.40647	6.76395	7.08792	6.54531	7.17702	6.89607	6.61008	6.73862	6.78399	7.1947	6.90795	6.96865	6.83484	6.8518	6.9561	6.95799	6.76336	7.06961	6.93819	6.8105	6.93458	7.41272	6.87315	7.3218	6.59367	7.07599	7.13677	7.26571	7.23642	6.65646	6.88621
Bnip3	3.66237	3.46616	3.7061	3.40661	3.71911	3.10781	3.46163	3.69104	3.72742	3.4285	3.73981	2.90837	4.07625	3.76042	3.77378	2.64152	3.85122	4.19531	4.15267	4.11851	3.96643	3.56322	3.53471	3.7903	3.94284	3.63759	5.85371	3.99972	3.25341	3.33259	3.99859	4.28274	4.63485	4.0534	4.3368	3.7284
Bnip3l	8.5613	8.50953	8.84757	7.76678	8.15773	8.5631	8.29473	8.35179	8.15979	8.04059	8.20401	7.9396	8.51559	8.42486	8.25964	7.76647	7.77659	7.68613	9.14854	8.90576	8.77436	8.31385	8.51129	8.2859	8.66218	8.97248	9.38293	8.33732	7.97585	8.65567	8.41147	8.45664	8.77682	8.24653	8.23186	8.3043
Bod1	2.33247	1.86596	2.62404	2.21998	1.92915	0	1.80908	0	1.07944	1.92238	3.58332	1.51568	0	2.58994	2.81498	2.4025	2.7817	2.1583	2.67705	2.69078	1.62774	2.14307	1.95901	2.22258	2.00972	1.71772	2.09713	3.0872	2.07076	2.68807	2.09688	1.80535	1.26461	2.85626	0	3.28587
Bod1l	6.7575	6.67304	6.5002	6.92226	6.03543	5.6592	6.04678	5.71793	5.73664	6.38058	5.53352	6.30547	6.73862	6.43217	6.32348	6.34034	6.37977	6.44328	6.2353	6.13703	6.09984	6.12742	5.75344	6.41528	5.99574	6.02451	3.70281	7.20183	6.55199	6.09062	6.01533	5.55185	5.83554	6.18538	6.35174	6.70442
Bola1	4.60424	5.34613	5.59525	4.54909	3.49789	4.32566	5.90324	4.38262	4.05181	4.62755	4.43292	4.8982	5.43682	4.93059	4.61734	4.29115	5.00279	5.33119	5.03445	5.07638	5.6373	5.37277	5.32148	5.82325	4.65629	5.39934	5.85371	5.40059	5.41325	5.59053	5.76505	5.69769	5.68634	5.67046	2.27544	4.76869
Bola2	7.60887	7.59272	7.97436	7.26452	7.53459	7.58134	7.80654	7.64092	7.4667	7.9211	8.00244	8.2745	7.16807	7.48572	7.46991	7.96105	7.8361	8.1982	7.63542	8.08477	7.97233	7.81988	8.04069	7.69334	7.40089	8.25483	8.6862	7.74622	7.61666	8.2739	8.61125	8.05791	7.99628	7.58015	6.81252	8.12593
Bola3	6.29634	6.20955	6.07213	5.8622	6.52046	6.34016	7.02199	5.03452	6.30242	6.95165	6.84528	6.94001	5.82118	6.09069	6.13805	6.60323	6.70405	6.75997	6.91767	6.85286	6.8662	6.0302	6.07517	5.88424	6.74075	7.59462	7.44022	6.62176	6.61617	7.5259	7.21434	6.48908	6.80486	6.86375	5.96493	7.02842
Bop1	2.67406	3.53362	3.60766	3.96675	4.30174	3.10781	3.61693	4.38262	4.23354	3.6043	3.88097	5.255	4.28637	4.2151	3.04344	4.104	4.34404	4.78432	2.92495	2.29207	3.42689	3.9825	3.34273	4.02506	4.07827	4.57843	3.81908	3.99972	4.8977	5.1734	3.91149	3.64128	3.23507	3.37323	4.98785	4.94302
Bora	4.4937	3.983	4.54724	5.44408	4.43258	5.76408	4.89716	4.07788	5.00765	3.6043	4.52185	4.07077	4.46974	3.9481	4.99047	5.37469	4.80036	4.72257	4.5349	4.86109	3.96643	5.33255	5.19449	5.45236	4.61233	3.34435	4.0268	4.5543	4.84512	4.93745	4.58164	4.97457	4.83718	4.69852	3.11818	4.20995
Borcs5	4.27718	4.77879	3.50201	4.4008	4.55253	4.57665	4.39462	4.07788	5.05673	3.6043	4.60561	4.2923	4.63242	4.0056	4.00834	4.60534	4.80036	4.84354	4.67691	3.37214	4.40641	4.63918	4.85384	4.07823	4.96673	5.0465	4.44389	4.3035	4.67477	3.33259	3.99859	4.12664	4.15635	5.00929	4.98785	3.7284
Borcs6	5.65354	5.70916	5.80969	4.8979	5.43044	5.14132	5.40324	6.70416	5.73664	5.10793	5.08573	5.4517	5.60304	6.20556	5.83656	5.64571	5.65911	5.31035	5.68251	5.77575	5.44302	5.99198	5.38932	5.28152	6.1877	5.80581	6.08032	6.31712	6.09217	5.55385	5.30003	5.81743	5.93811	4.69852	5.67069	6.28592
Borcs7	4.97724	4.69288	4.64974	5.56051	5.39878	5.42337	5.56461	5.71793	5.19468	5.22018	6.15052	5.7296	4.46974	5.79703	5.43495	5.60393	5.65911	5.52452	5.18469	4.56108	4.95237	5.15945	4.56208	4.36169	4.78066	5.86367	6.08032	6.24763	5.13523	5.66122	5.21164	5.12656	4.68816	5.48186	4.98785	5.78842
Borcs8	6.09334	6.08016	6.09047	5.90687	5.83709	5.6592	5.99107	6.39932	6.05918	5.96325	5.25092	6.18159	6.17807	5.81322	6.1131	5.65938	5.61036	5.43109	6.32434	6.33111	6.21257	6.31454	6.16501	6.09241	5.94348	6.21438	6.48416	4.5543	4.79054	5.94238	6.00485	6.24516	5.99209	6.05602	5.43483	5.17043
Bpgm	4.75563	4.39936	4.91967	3.92392	3.3731	3.63588	4.95654	3.16087	4.05181	4.78186	5.19793	5.02719	1.86581	5.09855	3.95318	3.45988	5.00279	4.10139	7.2257	6.59814	6.6125	3.49199	3.99287	3.96985	4.78066	7.83053	5.71051	6.77778	6.92568	7.88092	3.99859	4.90418	5.17254	7.35116	7.78111	6.65515
Bphl	4.4937	4.32516	4.25373	4.4317	4.71561	3.63588	5.12129	3.16087	4.23354	4.92125	6.15052	5.67814	5.43682	5.09855	5.30879	5.57539	5.5599	5.59514	4.77494	5.04265	4.62585	5.15945	4.50206	5.13865	4.56699	5.80581	5.3728	2.24769	5.261	5.39699	4.52408	4.64117	5.63297	5.37743	3.11818	5.17043
Bpnt1	2.95005	3.46616	1.84092	3.96675	1.92915	4.32566	4.83522	0	3.30827	4.45474	4.33815	4.54301	3.15934	4.35441	3.56886	3.57968	2.7817	4.55553	1.76468	2.50515	2.86212	3.07099	3.80693	3.16121	2.47004	4.71044	3.1127	2.24769	3.89446	3.41672	3.00431	1.5831	3.16159	2.85626	2.27544	2.17033
Bptf	6.88341	6.59623	6.94524	7.22095	7.02439	5.76408	6.56845	6.39932	6.90826	6.38058	6.06433	6.33899	6.77392	6.70809	6.777	6.91367	6.45072	6.55379	6.55339	6.76253	6.2788	6.39484	6.14552	6.73796	6.50866	5.68262	4.64633	7.2735	6.86094	6.39021	6.18277	6.72515	6.09436	6.05602	7.56401	7.30886
Braf	5.11432	4.43509	4.4369	4.60439	5.63452	4.97649	3.61693	5.34761	4.39492	3.22827	3.88097	3.6036	3.53343	3.69201	4.06147	4.02178	4.21954	4.51967	5.38425	4.82187	5.24521	5.01447	4.56208	5.13865	4.61233	2.47983	2.91784	5.83891	4.61321	4.75556	4.58164	4.66973	4.88362	4.0534	5.15271	4.20995
Brap	4.80276	4.43509	4.37839	4.9415	4.60896	5.5461	3.8849	4.07788	4.23354	4.3599	4.60561	4.94249	4.46974	4.52141	5.17053	5.0407	5.36796	4.51967	5.27681	4.97275	4.88593	5.22682	4.56208	4.17903	4.69895	4.83137	2.91784	5.11865	4.41098	4.58423	4.40158	4.61202	3.76803	4.69852	5.15271	5.09854
Brat1	2.67406	3.77574	3.12881	3.63622	3.08557	3.63588	2.58698	3.16087	3.84384	3.6043	4.1276	3.80894	4.07625	2.43113	3.24061	2.4025	3.09687	2.33377	2.20069	3.9099	3.42689	1.09694	2.95207	2.70065	3.62661	4.27152	1.06547	3.61443	4.41098	3.57156	3.23706	3.45689	3.49644	2.04288	2.27544	3.28587
Brca1	3.89763	3.2425	2.97936	4.30391	3.81818	3.63588	3.0896	2.31378	2.71503	4.03101	2.35611	2.90837	3.53343	3.69201	3.41405	3.79302	2.12369	2.98692	3.55961	3.00282	2.71679	1.94392	3.2726	3.96985	3.0989	4.27152	1.06547	4.7679	4.25847	2.21091	3.43743	2.69807	3.16159	4.0534	3.11818	4.34035
Brca2	4.17342	4.50398	4.91967	5.44408	5.03683	3.63588	3.61693	3.69104	3.84384	3.4285	3.20786	3.80894	1.86581	3.82573	4.06147	4.3597	4.71069	4.44516	4.92483	3.57449	3.33026	3.8746	4.23336	4.80185	3.79337	3.34435	0	5.83891	3.54476	4.0111	4.08073	2.69807	3.71765	4.30188	4.3368	4.76869
Brcc3	6.07426	5.88734	6.42992	6.13993	5.52146	5.5461	6.12651	6.32979	5.79565	5.82806	6.38194	5.8738	5.95021	5.78065	5.37325	6.12091	5.75193	6.1231	5.78017	5.85561	5.59633	5.73861	6.10574	6.21618	5.81362	6.70061	6.03295	6.01651	6.26226	5.60853	6.38222	6.10576	5.94907	5.37743	5.15271	5.78842
Brd1	5.94368	5.95041	5.24846	5.64205	5.73936	4.97649	5.77716	5.19954	5.32058	5.22018	5.14292	5.42073	5.60304	5.12474	5.04425	4.6333	4.96452	5.43109	5.42509	5.2039	5.1062	5.39246	5.01285	5.39065	5.30724	3.34435	3.1127	6.01651	5.33913	4.90869	4.76674	4.66973	5.0353	5.14271	4.98785	5.53967
Brd2	5.94368	5.88734	5.4032	6.29082	6.44496	6.69877	5.87274	5.34761	5.7062	5.93063	5.73295	6.163	5.67948	6.22989	5.83656	6.3488	6.32038	6.07449	5.73217	5.6244	6.26579	5.99198	6.42145	6.22799	5.8329	5.97286	4.20834	6.24763	6.30182	6.1896	5.90691	5.93976	5.50514	6.61089	6.05104	6.52408
Brd3	6.78122	6.84886	6.96525	6.85545	6.56393	6.34016	5.77716	6.46566	6.82572	5.89724	6.7004	5.6517	6.50654	6.3896	6.45835	5.87378	5.86014	6.2379	6.82916	6.77285	6.88333	6.87956	6.40516	6.57178	7.05177	6.82234	5.48266	6.62176	6.53549	6.2015	6.55741	6.70458	6.83472	6.18538	7.12197	6.49637
Brd4	7.05381	6.84222	6.26209	6.95985	7.61946	6.69877	6.73032	7.08792	7.24112	6.54049	7.24852	6.83819	6.73862	6.74232	7.18276	6.93629	7.15014	6.59745	6.84429	6.50215	6.30446	6.7784	6.05442	6.59933	6.79091	6.63567	5.79812	6.77778	6.98765	6.67279	6.08664	6.75211	6.36373	6.35997	7.90189	6.72844
Brd7	6.50309	6.53171	6.48642	6.71806	6.97156	6.69877	6.36433	6.17978	6.17484	6.38058	6.33362	6.10572	7.22018	6.43217	6.78492	6.56745	6.60798	6.73673	6.37732	5.89394	6.5495	6.42384	6.00121	6.44595	6.4094	6.3007	5.33424	6.5075	6.73654	6.33722	6.32438	6.39811	6.10419	6.70019	6.76236	6.70442
Brd8	5.84582	5.55535	5.76472	5.95021	4.66327	4.97649	4.70277	5.34761	4.6719	5.63904	4.96405	4.70604	5.43682	5.09855	5.12134	5.42355	4.66368	5.03353	5.46479	5.26367	4.85152	5.57589	5.37266	5.6051	4.4718	5.0465	3.70281	4.7679	5.22028	5.47755	5.33392	4.90418	4.95059	5.57924	4.80168	5.23891
Brd9	6.20281	5.99895	6.12646	6.15852	6.38158	6.53058	6.66061	5.48189	6.17484	6.11617	6.38194	5.96251	6.58812	6.45299	6.41818	6.10103	5.94123	5.50631	5.98522	6.25952	6.07022	6.0302	6.3636	6.39446	5.85193	6.56766	5.82618	4.95391	6.04632	5.67837	6.36593	6.0847	6.01313	6.30409	6.20921	6.31793
Bre	6.31271	6.14631	6.29409	5.93949	6.24581	6.19765	6.38609	5.48189	6.41962	6.2007	6.4055	6.55408	5.88714	6.45299	6.3873	6.15988	6.22646	6.39461	6.14041	5.8749	6.1573	6.57799	5.60441	6.38394	6.70979	6.82234	6.12619	6.31712	5.99897	6.63816	5.76505	6.64108	6.31373	5.37743	6.13229	5.59297
Brf1	3.98195	4.1642	4.74544	4.709	5.46142	3.10781	4.30608	4.07788	4.54005	4.14917	4.23671	4.2923	3.53343	4.44032	4.42802	4.21918	5.04008	5.10787	4.743	4.82187	4.20313	4.26484	4.11812	4.52379	4.2602	3.34435	2.91784	3.0872	3.89446	4.68945	4.1958	4.52088	4.76459	5.37743	4.03261	3.7284
Brf2	1.69714	1.63974	4.04389	2.47861	3.61274	4.02161	1.80908	2.31378	2.94098	2.37454	2.69893	2.71766	1.86581	2.43113	1.49115	2.64152	0	3.50991	1.9991	2.85522	3.42689	2.74309	2.85942	2.83028	2.00972	2.9759	2.42531	3.0872	1.04755	2.21091	3.00431	1.32025	1.52113	0	3.64666	1.45976
Bri3	6.06462	5.47183	6.12646	5.61538	6.34882	6.19765	5.63899	6.58983	6.49277	5.86307	6.20525	5.18299	5.88714	6.13001	5.92522	6.02918	5.50761	5.74243	6.24674	6.00317	6.08511	5.59301	6.09562	5.75957	6.3302	5.61684	7.20401	4.7679	4.99746	5.57231	5.24765	5.68375	5.83554	5.26484	6.05104	5.09854
Bri3bp	5.86815	5.73804	5.76472	6.67995	6.54958	6.12073	6.7132	6.46566	6.3816	6.90202	6.38194	6.25368	6.46395	6.54313	5.96759	6.21643	6.69238	6.49959	5.13633	5.55433	5.61696	6.36525	6.10574	6.52467	5.90755	7.11218	5.85371	6.5075	6.5683	6.37977	6.1546	6.04164	5.47512	6.78429	6.41805	6.40991
Brip1	3.25124	3.71891	4.25373	4.36922	3.91088	0	4.39462	0	4.05181	3.4285	2.69893	3.98866	3.83022	3.09273	3.56886	3.88892	4.21954	3.7141	3.23158	2.50515	3.90065	3.81747	2.76042	3.7903	3.33359	4.27152	2.09713	4.5543	3.40643	3.71137	3.16357	2.31969	3.08417	2.85626	0	3.90738
Brip1os	5.41657	5.9627	5.43225	5.99227	4.95212	4.97649	5.35991	5.48189	5.05673	4.98619	5.4901	5.38907	5.24892	4.98878	5.51332	5.16083	5.83914	5.56027	5.40481	5.17306	5.61696	5.95272	5.84085	5.98513	5.4884	5.14313	5.68008	5.74117	5.37667	5.22098	5.21164	5.50506	5.3484	5.26484	5.55758	5.59297
Brix1	5.64063	5.70916	5.91635	5.64205	4.71561	6.03949	5.48618	5.19954	5.98505	6.11617	6.06433	5.85075	4.77859	5.78065	5.45495	6.02918	5.9608	5.87607	5.94367	6.03782	6.02463	5.69169	5.56094	5.32617	5.10004	5.54792	5.58475	6.87315	5.8198	6.50035	6.21041	5.81743	5.56335	6.65623	6.54218	6.07733
Brk1	8.55271	8.72506	8.62345	8.1756	8.59847	8.12493	8.74556	8.26131	8.30397	8.54508	8.45611	8.62976	8.06672	8.63986	8.46584	8.58313	8.33706	8.29684	8.79451	8.8508	8.82178	8.47261	8.67824	8.61086	8.7306	8.78306	9.97346	7.97841	8.1431	8.32922	8.85687	8.83956	8.73469	8.34673	8.03463	8.24726
Brms1	5.01775	5.32724	5.51605	5.57442	5.33329	5.28923	5.90324	5.60473	5.73664	6.22781	5.90813	5.91884	6.12439	5.60576	5.07041	5.87378	5.77423	5.46919	5.42509	5.32106	5.7349	5.75392	5.23193	5.41151	5.33456	5.80581	5.5175	6.09774	5.64625	5.69531	5.35058	5.45669	5.7123	6.41377	5.55758	6.37989
Brms1l	2.45554	3.07147	1.84092	3.27647	3.91088	2.26614	3.0896	0	2.94098	3.22827	3.20786	3.6036	4.28637	4.0609	2.68558	2.26629	3.35539	4.00092	1.9991	3.57449	3.83172	2.14307	2.27817	2.40013	3.7124	2.47983	0	0	2.88794	3.77651	1.74041	3.16744	2.82334	2.04288	4.03261	2.64429
Brox	4.31017	4.50398	4.54724	4.49159	4.66327	5.5461	4.70277	5.03452	5.15014	3.4285	4.68478	4.54301	3.83022	4.77394	4.78468	4.76551	4.40247	4.28349	4.45828	5.10933	4.40641	4.67178	4.77994	4.48494	4.07827	5.54792	4.82382	4.95391	4.25847	4.62017	4.63699	4.35489	4.52195	3.75304	4.3368	4.76869
Brpf1	6.73337	6.53171	6.5002	6.80324	6.77595	6.12073	6.84475	6.86027	6.62882	6.25442	5.90813	6.12507	6.22983	6.60954	6.59976	6.27971	6.72709	6.0868	6.42842	6.39931	6.23943	6.18502	6.16501	6.65289	6.34371	5.80581	4.82382	6.56576	6.5188	5.95651	6.58582	6.30102	6.30522	6.70019	5.67069	6.07733
Brpf3	2.67406	3.65975	3.50201	3.78723	3.23648	5.5461	2.86007	5.19954	2.44702	2.7183	2.69893	3.48882	3.53343	2.58994	3.14539	2.4025	3.46913	2.49019	4.1032	3.9099	3.60267	3.338	3.12122	2.94923	4.1415	4.08951	2.09713	0	3.54476	3.77651	3.99859	3.38978	3.37167	0	3.11818	3.28587
Brwd1	4.65649	4.20615	2.97936	4.49159	3.08557	3.10781	3.75713	5.03452	3.46192	2.37454	3.20786	3.70992	2.65294	3.54462	2.81498	3.32923	3.23192	3.58123	4.29164	3.57449	3.83172	3.69594	3.2726	4.31815	3.62661	3.63759	2.69249	3.0872	3.89446	4.30402	2.82526	3.16744	4.03815	0	4.3368	4.20995
Brwd3	3.76112	4.43509	4.79101	3.83425	4.76611	2.26614	3.8849	3.16087	3.84384	4.78186	2.97572	3.07679	4.63242	3.54462	4.75272	3.63604	3.76476	2.87784	4.37736	4.11851	3.1151	4.60582	2.95207	3.58519	4.07827	3.63759	2.69249	3.99972	3.99443	3.83883	3.91149	3.64128	3.30498	4.0534	5.30065	4.45993
Bscl2	6.25457	6.1992	5.9569	6.412	7.07535	6.34016	6.79681	7.04517	6.70776	6.25442	7.09757	6.84987	6.9994	6.64616	6.75297	6.77622	6.82648	6.30264	5.81131	5.77575	5.86132	6.57799	5.95718	6.67031	6.89549	6.49629	6.14858	6.91857	6.60039	6.1896	6.09655	6.06333	5.98146	5.75626	6.60045	6.18539
Bsdc1	4.8484	4.83335	4.54724	4.04878	4.76611	5.14132	4.47804	3.16087	3.60077	3.9023	4.83116	4.35918	4.07625	3.9481	5.07041	4.42514	4.15302	3.27199	5.27681	5.26367	4.95237	4.38768	4.50206	4.31815	4.96673	4.43313	3.28434	5.11865	5.261	4.54739	4.15845	4.48918	4.03815	4.30188	5.30065	3.7284
Bsg	6.7575	7.10316	6.96525	6.70547	7.16277	7.02848	7.45155	7.2845	7.2517	7.16304	7.34916	7.33836	7.16807	7.16454	6.75297	7.14491	7.249	6.97384	6.99429	6.70978	7.45851	7.23083	7.14023	6.9525	7.42014	8.28691	7.93491	7.34178	7.38763	7.53534	7.16341	7.12134	6.99136	7.60349	7.04012	7.02842
Bst1	6.3289	6.43799	6.24582	3.20671	4.15784	5.42337	4.30608	5.19954	5.6751	6.99962	6.12236	5.82732	5.03284	4.56031	6.34507	6.01862	6.58294	6.07449	6.81387	7.04394	6.1573	4.53671	5.07597	5.13865	5.6274	5.86367	6.12619	7.23811	6.55199	6.76394	7.23691	7.73192	7.62473	6.61089	6.65646	6.90741
Bst2	7.23224	6.91359	7.0332	6.71178	6.99293	7.29668	7.9153	6.46566	7.53756	7.76329	7.8732	7.60956	6.9994	7.73556	7.15247	7.72809	7.75433	7.81007	7.27679	7.15069	7.31438	6.72504	6.96233	6.51506	7.02687	8.55621	7.651	7.34178	7.93869	8.24254	7.30257	6.99157	7.39156	7.45744	7.23665	7.80304
Btaf1	4.4937	3.15952	3.96657	4.46195	4.23158	5.42337	4.1108	4.84815	3.46192	5.37372	3.88097	3.6036	4.77859	4.98878	4.61734	5.0407	5.04008	5.33119	4.95303	4.05227	3.75934	3.9825	3.70412	4.22691	4.56699	3.88117	3.81908	5.52327	5.55096	4.58423	4.71623	4.35489	4.33408	3.75304	5.43483	5.694
Btbd1	5.13288	5.22892	5.34328	5.38215	5.19267	5.14132	5.26914	4.38262	4.39492	5.16515	5.84059	5.42073	4.28637	4.63509	4.72005	5.37469	5.1465	4.87226	4.83678	5.04265	5.1062	5.33255	5.07597	5.39065	4.61233	4.43313	5.61723	3.61443	5.261	5.37613	4.93076	5.28267	5.7875	5.26484	5.43483	5.78842
Btbd10	5.57428	4.83335	4.96013	5.00452	5.15526	4.97649	4.95654	4.07788	5.23788	4.14917	4.68478	5.32359	5.75207	5.2726	5.49412	4.21918	4.92519	4.51967	5.06061	4.78155	4.95237	4.85328	5.40579	5.6051	5.06785	4.43313	5.29462	4.95391	4.33674	4.84937	5.38332	5.72517	4.97224	4.0534	2.27544	5.48433
Btbd19	2.19791	2.38741	2.97936	1.90464	3.23648	3.10781	2.58698	4.38262	1.07944	4.25838	1.24689	2.49783	2.65294	3.19514	2.2086	2.84651	3.76476	2.6313	3.55961	3.47686	3.22668	2.96975	2.41466	3.05911	2.65474	0	3.43772	5.11865	3.40643	3.64316	3.00431	2.45714	3.30498	2.85626	4.80168	3.28587
Btbd2	4.43508	4.80633	4.11728	4.60439	4.4938	6.12073	4.89716	4.84815	4.54005	4.78186	3.58332	4.75653	4.77859	5.17573	4.25636	4.42514	4.08328	4.81424	3.4049	4.18185	3.60267	4.30696	4.47108	4.48494	4.4718	2.9759	4.2912	2.24769	4.48159	3.57156	4.2322	4.08483	4.03815	3.37323	4.3368	4.06658
Btbd6	2.56893	1.37132	0	2.47861	3.23648	2.26614	1.80908	2.31378	3.13628	1.92238	1.24689	1.92182	0	2.04892	2.00668	1.75778	2.37784	1.44993	1.13685	1.73922	0.762784	2.61483	1.28923	3.25656	2.25816	3.63759	1.67162	0	2.39728	2.21091	2.09688	2.45714	2.24498	0	3.64666	0
Btbd7	3.80808	3.65975	2.62404	3.52598	2.917	2.26614	3.75713	2.31378	3.72742	3.4285	4.00955	3.70992	4.63242	3.46486	2.81498	3.25918	3.23192	3.50991	3.55961	4.41057	4.14749	4.17673	3.47351	3.96985	3.53539	3.34435	2.91784	3.61443	4.08791	3.24325	3.6675	3.16744	3.76803	4.0534	4.98785	4.45993
Btbd9	5.61445	5.93802	5.89564	5.47408	4.95212	5.14132	5.01357	6.39932	5.15014	4.85324	5.30204	4.85251	5.60304	5.3187	5.37325	4.76551	4.34404	4.84354	5.48425	5.5302	5.53261	5.7075	5.70101	5.94275	5.51251	5.14313	5.74031	5.52327	4.5489	3.95593	5.09789	5.76543	5.3484	4.30188	4.03261	4.67293
Btd	3.55636	3.83041	4.11728	4.04878	2.7261	2.26614	3.75713	5.19954	4.05181	4.03101	4.43292	3.9016	4.28637	4.0056	4.25636	4.39279	4.21954	3.58123	3.76442	4.18185	3.60267	4.22146	3.1989	4.59849	3.43802	2.9759	5.41036	2.24769	4.08791	3.33259	3.81878	4.28274	3.4354	3.37323	2.27544	4.94302
Btf3	7.56512	7.73922	8.12431	7.25591	7.71896	7.79442	8.15596	7.20905	7.87514	7.82673	7.74053	7.80214	7.81891	7.6525	7.72172	7.741	7.79307	7.85032	7.90449	7.7969	7.71922	7.65846	8.01139	7.53119	7.55398	7.9949	8.54137	7.23811	7.66297	7.88092	7.99321	7.50104	7.81646	7.48283	7.08162	7.30886
Btf3l4	4.68192	4.63262	5.1816	4.96281	3.91088	3.63588	4.95654	5.34761	4.79271	4.62755	4.75983	4.80532	4.46974	4.74046	4.38698	4.71407	4.5648	4.59052	4.5349	4.82187	5.39605	5.37277	5.19449	4.80185	4.4718	5.14313	5.48266	3.61443	4.84512	4.25915	4.7417	4.92803	5.17254	3.37323	4.58789	4.57036
Btg1	8.52839	8.41431	8.24792	8.60303	8.92174	9.05159	8.87432	9.09049	8.87549	9.53503	8.98014	8.49127	8.6065	8.85458	8.64622	8.7584	8.72259	8.62894	9.04592	9.24851	8.78123	8.52485	8.71506	8.75457	8.41912	9.03677	8.83862	9.2926	8.8878	8.82495	8.1795	8.59153	8.49774	9.07081	9.30149	8.95544
Btg2	8.931	8.5365	8.73258	8.48092	8.61922	8.634	8.20576	8.54826	8.45348	9.41337	8.38677	8.18055	7.9169	8.86044	8.56806	8.54131	8.56842	8.10447	9.39967	9.56885	9.00511	8.69111	9.19429	9.05899	8.95617	8.82736	9.07622	9.38448	8.72272	9.36453	8.01948	8.90109	8.5899	8.44043	9.49824	8.7182
Btg3	3.80808	2.9777	3.79825	3.58215	4.43258	3.63588	4.00227	4.07788	3.30827	3.9023	2.97572	3.07679	1.86581	3.19514	2.54342	3.52102	3.67279	2.87784	3.03456	3.83307	3.75934	2.96975	3.80693	3.16121	2.00972	4.43313	3.43772	4.7679	2.07076	3.57156	3.49848	3.75229	3.30498	3.75304	3.64666	2.64429
Btk	5.64063	5.82139	5.48866	5.88471	5.46142	5.6592	5.56461	5.82288	5.85235	5.89724	5.69521	5.32359	5.24892	5.4279	6.02222	5.93122	5.53399	6.19307	5.84179	5.55433	6.26579	5.99198	5.70101	6.01271	5.71314	5.0465	6.05683	6.24763	5.89933	5.91372	5.84949	5.87989	5.5916	6.61089	6.48145	6.03943
Btnl9	2.95005	3.983	3.26422	4.27011	2.7261	0	1.80908	0	2.44702	0	1.24689	1.51568	2.65294	1.52746	2.81498	1.75778	2.12369	0	2.80632	3.25923	1.25914	3.41705	2.41466	3.25656	1.70942	1.71772	2.91784	0	0	0.682524	2.09688	1.5831	2.50472	0	2.27544	2.17033
Btrc	2.67406	3.07147	2.15159	3.83425	3.49789	3.63588	4.00227	3.69104	3.95157	2.9957	1.24689	3.98866	2.65294	3.09273	3.32994	2.52696	3.76476	3.43488	3.76442	3.25923	2.86212	2.86087	3.4096	3.72512	3.79337	3.34435	3.43772	3.99972	1.64803	2.81751	2.91756	3.80475	3.4354	4.51379	4.58789	3.28587
Bub1	4.8484	5.18763	5.07511	5.95021	4.43258	4.97649	5.6748	4.63408	5.15014	5.42146	5.4901	4.22217	4.46974	5.2726	4.9628	5.10202	5.27717	5.57781	4.45828	5.45528	4.74309	5.57589	5.43819	5.5497	5.06785	4.71044	4.87844	5.26649	5.64625	5.07326	5.28278	5.26406	5.01458	5.75626	4.3368	5.694
Bub1b	5.30643	6.32829	5.14697	6.90033	6.29823	6.8009	6.01919	5.92072	5.93343	5.59807	6.35798	5.59733	6.37481	5.82923	5.51332	6.42275	5.83914	6.29205	5.11153	5.17306	5.77217	6.68567	6.28563	6.91645	5.55957	5.68262	4.93107	6.31712	5.67666	5.85461	5.46206	5.69769	5.49021	6.65623	6.05104	6.03943
Bub3	7.59889	8.19486	7.79587	8.11739	8.02922	7.29668	8.15596	7.58232	8.06702	7.87039	7.8128	7.88957	7.36609	7.85379	7.9677	7.72484	7.75992	8.00747	7.63977	7.26477	7.88573	8.0543	8.03541	7.98545	7.63311	7.72522	8.03448	7.58654	7.45936	7.83579	7.80968	7.88595	7.90073	7.62646	7.67664	7.86934
Bud13	4.1371	4.03048	3.96657	4.0881	4.81491	4.57665	3.46163	2.31378	3.30827	4.25838	3.20786	3.9016	4.28637	4.11415	4.06147	4.48774	3.85122	3.18308	4.1032	4.30074	4.74309	4.26484	4.64768	3.72512	3.79337	5.0465	1.67162	4.5543	3.08222	3.24325	3.7701	4.16728	3.37167	3.37323	4.58789	4.94302
Bud31	6.87241	7.18935	7.09809	6.82668	7.2452	6.84938	6.9653	7.00112	6.75314	6.96782	7.12622	7.10498	7.36609	7.02552	6.71202	6.96408	6.83712	6.89206	7.2879	7.55523	7.20281	6.82987	7.1353	6.77063	6.83939	6.49629	7.91545	6.72762	6.43232	6.93061	7.56051	7.40661	7.3754	6.86375	6.71038	6.07733
Bysl	3.89763	2.9777	3.60766	2.59238	4.08013	3.63588	3.46163	3.69104	4.14554	4.25838	3.73981	3.36411	3.83022	3.88821	3.77378	4.06348	4.34404	4.90042	3.13643	3.13671	3.60267	4.17673	3.64983	3.65685	3.22101	3.34435	2.91784	3.61443	4.67477	4.87933	3.23706	3.521	3.4354	5.00929	4.03261	5.36683
[truncated: 9,753 more rows]

## Sheet: 3B
Supplementary Table 3b: RNA-seq normalized counts of bone marrow macrophages from unengrafted mice treated with PBS (Uneng) or Cyclophosphamide (Uneng + CTX) 48 hours after treatment. Each column represents an individual mouse.
[truncated: 11,144 more rows]
