# Supplementary material for: Performativity and National Identity: Japan’s Domestic Policies
Source: Oxford University Press journal article supplement (doi:10.1158/2159-8290.cd-18-1393), 2007-01-01
Supplement: 21598290cd181393-sup-212867_2_supp_5481626_pq9jqx.xlsx [file 21598290cd181393-sup-212867_2_supp_5481626_pq9jqx.xlsx]

## Sheet: ScRNA-Seq Quality Metrics
Supplementary Table 5A: Single Cell RNA-Seq Cell Quality Metrics
Condition	number of cells processed	number of cells passing filter	% passing filter*	nGene*	fastq_frag_count*	genome_mapped*	%genome_mapped*	trans_mapped*	%trans_mapped*	*average calculated over cell passing filtering
DFBL-20954 + PBS	192	97	0.505208	1925.41	604166	546313	89.3772	359547	59.5357
DFBL-20954 + CTX	192	156	0.8125	2486.27	908040	842130	90.8653	592757	62.1465
DFBL-20954 + Dox	192	132	0.6875	2285.4	696656	650954	93.2249	493632	70.0714
DFBL-69487 + PBS	192	133	0.692708	2544.15	1359365	1097764	78.3055	769279	54.499
DFBL-69487 + CTX	192	123	0.640625	3068.04	1248461	1058589	82.2391	764937	58.2818
DFBL-69487 + Dox	192	133	0.692708	3098.41	1192455	980783	80.9189	732365	59.631
Uneng	192	148	0.770833	1882.2	668754	607425	88.6017	421059	60.0909
Uneng + CTX	192	170	0.885417	1843.81	1.13691e+06	1.0391e+06	90.7498	673146	58.2463
total	1536	1092	0.710938	2377.41	831390	763637	90.5985	607201	60.3137

## Sheet: Mac Cluster Distribution
Supplementary Table 5B: Number of Macrophage Cells in Each Cluster from Each Treatment
	0	1	2	3	4	5	total
DFBL-20954 + PBS	45	27	17	8	0	0	97
DFBL-20954 + CTX	49	9	65	3	28	2	156
DFBL-20954 + Dox	11	57	22	37	3	2	132
DFBL-69487 + PBS	13	25	34	24	19	18	133
DFBL-69487 + CTX	18	9	57	5	29	5	123
DFBL-69487 + Dox	1	39	12	62	9	10	133
Uneng	48	48	28	19	4	1	148
Uneng + CTX	86	46	18	14	4	2	170
total	271	260	253	172	96	40	1092

## Sheet: Genes in Clusters
Supplementary Table 5C: Genes that define each unique cluster from single-cell RNA-seq of bone marrow macrophages
	p_val	avg_logFC	pct.1	pct.2	p_val_adj	cluster	gene
1	6.08403e-97	1.58893	0.878	0.326	1.03191e-92	0	Sfxn5
2	3.91977e-86	1.84669	0.959	0.543	6.64833e-82	0	Ccl6
3	1.19127e-76	2.08748	0.978	0.857	2.02052e-72	0	Csf3r
4	1.54956e-74	1.80316	0.934	0.553	2.6282e-70	0	Retnlg
5	1.13042e-73	1.61649	0.923	0.621	1.91731e-69	0	Mxd1
6	5.38244e-71	1.63398	0.93	0.777	9.12916e-67	0	Sell
7	8.92091e-71	1.26185	0.959	0.952	1.51308e-66	0	Fth1
8	4.58553e-69	1.89098	0.982	0.96	7.77752e-65	0	Cxcr2
9	2.19037e-58	1.58808	0.948	0.654	3.71509e-54	0	Dusp1
10	1.9206e-54	2.11629	0.723	0.323	3.25754e-50	0	Il1f9
11	2.91134e-54	1.76674	0.793	0.462	4.93792e-50	0	Grina
12	2.20821e-50	2.42702	0.491	0.108	3.74535e-46	0	Egr1
13	2.46235e-48	1.26061	0.867	0.476	4.17638e-44	0	Mmp8
14	2.4073e-47	1.55544	0.731	0.307	4.08302e-43	0	Trem1
15	2.90529e-43	1.65614	0.712	0.359	4.92767e-39	0	Slfn1
16	9.3973e-43	1.44976	0.886	0.772	1.59388e-38	0	Ctsd
17	1.90799e-42	1.67881	0.476	0.116	3.23614e-38	0	Amica1
18	2.51219e-41	1.45567	0.775	0.467	4.26092e-37	0	Cyp4f18
19	2.81561e-40	1.30472	0.841	0.574	4.77555e-36	0	Cd33
20	4.07617e-40	1.39353	0.808	0.512	6.9136e-36	0	C5ar1
21	2.96864e-38	1.79904	0.675	0.351	5.0351e-34	0	Ccr1
22	6.3657e-38	1.34173	0.812	0.529	1.07969e-33	0	Srgn
23	1.37953e-36	1.72003	0.576	0.244	2.33981e-32	0	Fgl2
24	1.57113e-36	1.73182	0.775	0.555	2.66479e-32	0	Junb
25	1.58716e-35	1.54857	0.808	0.558	2.69198e-31	0	Slfn4
26	2.45323e-35	1.52279	0.76	0.551	4.16093e-31	0	Ccpg1
27	3.13118e-35	1.44853	0.321	0.051	5.3108e-31	0	Cd101
28	4.35957e-35	1.45318	0.605	0.255	7.39427e-31	0	Fpr1
29	5.94354e-35	1.43473	0.321	0.051	1.00808e-30	0	Clec4d
30	1.45105e-32	1.57747	0.273	0.034	2.46112e-28	0	Stfa2l1
31	6.35916e-31	1.74719	0.221	0.018	1.07858e-26	0	Gm5483
32	8.99943e-30	1.44645	0.609	0.273	1.52639e-25	0	Sirpb1b
33	1.27697e-29	1.85919	0.299	0.056	2.16587e-25	0	Niacr1
34	6.58576e-29	1.35819	0.683	0.406	1.11701e-24	0	Slc2a3
35	1.11092e-27	1.40783	0.229	0.028	1.88423e-23	0	Gm10872
36	1.19918e-27	2.33972	0.41	0.135	2.03393e-23	0	Il1b
37	3.61573e-27	1.51853	0.428	0.149	6.13264e-23	0	Rtp4
38	7.80406e-22	1.27448	0.384	0.128	1.32365e-17	0	Il1r2
39	8.19317e-22	1.38062	0.258	0.057	1.38964e-17	0	Arg2
40	2.33855e-20	1.30761	0.871	0.741	3.96641e-16	0	Sephs2
41	1.38047e-19	1.33256	0.624	0.432	2.34141e-15	0	Slc16a3
42	4.43419e-19	1.32482	0.705	0.575	7.52084e-15	0	Btg2
43	1.28139e-17	1.31399	0.653	0.482	2.17336e-13	0	Fbxl5
44	1.11315e-14	1.35505	0.417	0.213	1.88801e-10	0	Clec7a
45	1.45923e-13	1.78725	0.196	0.055	2.47499e-09	0	Asprv1
46	1.54931e-12	1.32793	0.306	0.139	2.62778e-08	0	Fas
47	3.62306e-12	1.51125	0.443	0.274	6.14508e-08	0	Osm
48	2.7312e-10	1.32949	0.144	0.038	4.63239e-06	0	Ifitm1
49	1.28142e-05	1.42793	0.162	0.076	0.217342	0	Ifit3
50	0.000477319	1.34116	0.487	0.497	1	0	Cd14
51	2.53817e-112	2.3121	0.988	0.562	4.30499e-108	1	Ltf
52	6.74441e-104	1.80989	0.992	0.518	1.14392e-99	1	Lcn2
53	5.37121e-100	1.46062	0.996	0.851	9.11012e-96	1	Anxa1
54	7.52138e-98	1.7749	1	0.68	1.2757e-93	1	Ngp
55	3.98298e-93	1.67961	0.973	0.589	6.75553e-89	1	Ifitm6
56	1.65715e-92	0.64694	0.985	0.448	2.8107e-88	1	Ly6f
57	2.3705e-88	0.81872	0.988	0.56	4.0206e-84	1	Ly6a
58	4.62521e-85	1.50757	1	0.472	7.84482e-81	1	Camp
59	1.21412e-82	1.40537	0.9	0.368	2.05927e-78	1	Trp53inp2
60	2.35522e-79	1.29623	0.981	0.536	3.99469e-75	1	Adpgk
61	2.47339e-77	1.17701	0.992	0.839	4.19512e-73	1	Cd177
62	3.46905e-74	1.12455	0.988	0.706	5.88386e-70	1	Plbd1
63	3.95072e-74	1.28944	0.931	0.381	6.70081e-70	1	1100001G20Rik
64	6.68819e-72	1.13729	0.969	0.469	1.13438e-67	1	Lrg1
65	2.23139e-68	1.20142	0.658	0.138	3.78466e-64	1	St3gal5
66	2.92809e-60	0.851446	0.996	0.767	4.96634e-56	1	Pglyrp1
67	1.94734e-55	1.24598	0.846	0.442	3.30288e-51	1	Ltb4r1
68	2.24672e-55	0.991903	0.896	0.52	3.81066e-51	1	Padi4
69	7.04388e-54	0.979171	0.973	0.66	1.19471e-49	1	Dstn
70	1.13601e-53	0.997263	0.965	0.576	1.92678e-49	1	Chi3l3
71	1.13824e-51	1.02462	0.754	0.264	1.93057e-47	1	Mapk13
72	1.90867e-50	0.804181	0.988	0.742	3.23729e-46	1	Chi3l1
73	9.21699e-49	0.849347	1	0.809	1.56329e-44	1	S100a8
74	3.83946e-47	0.861669	0.942	0.468	6.51211e-43	1	Mmp9
75	8.99655e-46	0.700205	0.95	0.484	1.52591e-41	1	Mrgpra2b
76	1.11421e-45	0.801117	1	0.774	1.88981e-41	1	S100a9
77	3.21651e-44	0.827846	0.946	0.725	5.45551e-40	1	Ncf1
78	2.88116e-42	0.796599	0.969	0.716	4.88674e-38	1	Plaur
79	9.07093e-41	0.687555	0.55	0.148	1.53852e-36	1	Itgb2l
80	2.2254e-40	0.76931	0.881	0.495	3.77451e-36	1	Serpinb1a
81	8.08734e-39	0.689266	0.981	0.828	1.37169e-34	1	Cybb
82	2.74754e-38	0.71527	0.462	0.106	4.6601e-34	1	Ankrd22
83	9.30257e-34	0.843696	0.823	0.48	1.57781e-29	1	Trem3
84	1.03934e-33	0.906039	0.427	0.106	1.76283e-29	1	Inhba
85	1.95603e-30	0.698085	0.823	0.516	3.31762e-26	1	Pnkp
86	3.16668e-30	0.660423	0.708	0.37	5.37101e-26	1	Mettl9
87	3.44531e-30	0.679194	0.827	0.513	5.8436e-26	1	Anxa3
88	3.93154e-29	0.697727	0.365	0.087	6.66828e-25	1	AA467197
89	6.78942e-28	0.826505	0.804	0.501	1.15155e-23	1	Mmp8
90	2.69666e-26	0.961865	0.569	0.272	4.57381e-22	1	Zmpste24
91	4.78703e-24	0.777904	0.562	0.274	8.11928e-20	1	Tcp11l2
92	8.47335e-23	0.763055	0.515	0.249	1.43717e-18	1	Cd3d
93	1.48049e-22	0.782615	0.542	0.267	2.51106e-18	1	Slc31a2
94	2.78683e-21	0.697685	0.596	0.315	4.72674e-17	1	Hvcn1
95	2.64926e-20	0.699028	0.685	0.429	4.49341e-16	1	Flot2
96	9.10859e-18	0.722006	0.3	0.099	1.54491e-13	1	Acvrl1
97	7.41546e-14	0.65059	0.704	0.581	1.25774e-09	1	B230208H11Rik
98	5.0918e-13	2.02578	0.354	0.172	8.63621e-09	1	Olfm4
99	2.67927e-12	0.749502	0.304	0.133	4.54431e-08	1	Fam132a
100	7.61355e-11	0.665779	0.358	0.185	1.29133e-06	1	Gadd45g
101	2.94172e-162	1.42717	0.964	0.113	4.98945e-158	2	Mndal
102	1.51322e-154	2.45044	0.925	0.123	2.56658e-150	2	Crip1
103	1.70311e-147	2.30356	0.881	0.095	2.88864e-143	2	S100a10
104	3.86411e-142	2.2431	0.945	0.188	6.55392e-138	2	Ctsc
105	1.22308e-140	1.72001	0.874	0.11	2.07446e-136	2	Ms4a4c
106	4.50974e-140	2.41461	0.921	0.168	7.64896e-136	2	Lgals1
107	1.53959e-136	2.63825	0.917	0.198	2.61131e-132	2	F13a1
108	1.49075e-126	1.56225	0.921	0.248	2.52846e-122	2	Ccr2
109	1.02101e-123	1.40577	0.85	0.116	1.73174e-119	2	Ms4a6d
110	7.77974e-123	1.44058	0.81	0.085	1.31952e-118	2	Ly86
111	6.948e-121	1.42262	0.787	0.112	1.17845e-116	2	Fn1
112	2.58848e-116	1.44789	0.7	0.055	4.39032e-112	2	Ifi30
113	4.443e-116	1.96436	1	0.486	7.53578e-112	2	Tmsb10
114	2.31039e-111	1.4449	0.976	0.234	3.91865e-107	2	Pld4
115	1.40552e-109	1.69637	0.98	0.418	2.3839e-105	2	Ms4a6c
116	6.10719e-108	1.30973	0.688	0.063	1.03584e-103	2	H2-DMa
117	8.29818e-108	1.3755	0.802	0.126	1.40745e-103	2	Nme2
118	1.24777e-100	1.48084	0.925	0.308	2.11634e-96	2	Prdx1
119	1.13955e-99	1.44705	1	0.715	1.93279e-95	2	Rplp0
120	4.94963e-97	1.44857	0.996	0.573	8.39507e-93	2	Rps26
121	5.7705e-97	1.5357	0.996	0.557	9.78735e-93	2	Rpl3
122	1.54105e-96	1.36432	0.968	0.271	2.61377e-92	2	Ctss
123	4.31309e-96	1.28992	0.972	0.411	7.31544e-92	2	Npc2
124	4.03082e-94	1.40252	1	0.577	6.83668e-90	2	Rps5
125	7.71076e-94	1.41698	0.656	0.073	1.30782e-89	2	Capg
126	2.42055e-93	1.48917	0.968	0.477	4.10549e-89	2	Ctsz
127	1.22736e-91	1.41678	0.992	0.708	2.08173e-87	2	Eef1a1
128	2.72579e-91	1.28412	0.64	0.079	4.62322e-87	2	Slc25a4
129	3.46698e-91	1.38436	0.806	0.168	5.88034e-87	2	Itgb7
130	4.86368e-90	1.30746	0.992	0.535	8.24929e-86	2	Rpl41
131	4.03539e-88	1.3463	0.909	0.302	6.84443e-84	2	Erp29
132	8.90187e-87	1.24972	0.81	0.193	1.50985e-82	2	Hint1
133	3.21287e-85	1.30671	0.972	0.436	5.44935e-81	2	Rps18
134	4.54476e-85	1.24403	0.98	0.485	7.70837e-81	2	Rps28
135	2.85408e-84	1.24732	0.976	0.43	4.8408e-80	2	Rpl35
136	7.34853e-83	1.26913	1	0.791	1.24638e-78	2	Hspa8
137	3.06908e-82	1.26184	0.988	0.611	5.20547e-78	2	Rps8
138	3.82039e-82	1.24697	0.98	0.594	6.47977e-78	2	Rpl13
139	8.09399e-82	1.40481	0.941	0.431	1.37282e-77	2	Rps2
140	1.00242e-80	1.35189	1	0.901	1.7002e-76	2	Psap
141	1.85575e-78	1.35109	0.968	0.746	3.14754e-74	2	Vim
142	6.10544e-77	1.27461	0.901	0.342	1.03554e-72	2	Sod1
143	7.15246e-66	1.33015	0.668	0.175	1.21313e-61	2	Gm5424
144	1.21798e-63	2.3783	0.854	0.666	2.06582e-59	2	Ly6c2
145	3.03448e-55	1.69441	0.842	0.647	5.14677e-51	2	Ly6c1
146	3.70732e-38	1.49411	0.316	0.042	6.28798e-34	2	Tmem176b
147	3.80202e-34	3.30122	0.399	0.097	6.44861e-30	2	Cd74
148	1.06939e-13	2.91626	0.174	0.041	1.8138e-09	2	H2-Aa
149	4.42919e-08	3.71908	0.17	0.064	0.000751235	2	H2-Ab1
150	2.62034e-05	2.53414	0.13	0.057	0.444436	2	H2-Eb1
151	9.95951e-124	1.39753	0.738	0.042	1.68923e-119	3	Chit1
152	5.45469e-101	2.21826	0.762	0.096	9.25171e-97	3	Ms4a3
153	2.51829e-100	1.22904	0.715	0.07	4.27127e-96	3	Prss57
154	2.66805e-95	1.4462	0.913	0.179	4.52528e-91	3	Rrm2
155	1.42593e-94	2.4179	0.698	0.08	2.41851e-90	3	Nkg7
156	1.55894e-91	1.54422	0.61	0.048	2.64412e-87	3	Fcnb
157	2.19781e-83	1.67207	1	0.89	3.72771e-79	3	Hmgn2
158	6.47796e-82	1.51323	0.779	0.136	1.09873e-77	3	Rgcc
159	4.70368e-79	1.30511	0.808	0.145	7.97792e-75	3	Hist2h3b
160	1.22166e-77	0.89468	0.919	0.228	2.07205e-73	3	Top2a
161	1.92004e-77	1.25714	0.767	0.147	3.25658e-73	3	Igfbp4
162	6.46584e-76	0.965097	0.779	0.137	1.09667e-71	3	Hist2h3c2
163	1.25744e-74	0.877022	0.477	0.027	2.13274e-70	3	Mogat2
164	1.06663e-73	0.994472	0.663	0.093	1.8091e-69	3	Spc25
165	9.54035e-69	1.08823	0.785	0.165	1.61814e-64	3	Asf1b
166	7.31286e-68	1.33695	0.884	0.247	1.24033e-63	3	Hist1h4d
167	2.10247e-67	1.48142	0.977	0.514	3.566e-63	3	Serpinb1a
168	3.6978e-67	1.11175	0.855	0.218	6.27184e-63	3	H2afx
169	6.92249e-67	1.07788	0.919	0.252	1.17412e-62	3	Stmn1
170	2.16847e-66	1.37214	0.983	0.522	3.67795e-62	3	Lta4h
171	4.68019e-65	1.10464	0.872	0.277	7.93807e-61	3	Tuba4a
172	6.95556e-63	1.19937	0.948	0.333	1.17973e-58	3	Cd63
173	2.05785e-62	0.852063	0.785	0.18	3.49032e-58	3	Dtymk
174	1.46928e-61	0.891392	0.953	0.283	2.49205e-57	3	Cebpe
175	2.62885e-59	0.970225	0.785	0.183	4.4588e-55	3	Agpat2
176	9.61458e-55	0.83954	0.93	0.3	1.63073e-50	3	Cd81
177	3.71471e-54	1.01626	0.994	0.73	6.30053e-50	3	H2afz
178	7.08694e-53	1.12551	1	0.718	1.20202e-48	3	Tubb5
179	8.88252e-53	0.958201	0.948	0.375	1.50656e-48	3	Tagln2
180	2.04783e-49	1.40942	0.89	0.368	3.47332e-45	3	Hist1h2ao
181	7.09748e-49	0.938161	0.802	0.262	1.2038e-44	3	Alas1
182	1.05749e-48	1.06662	0.86	0.327	1.7936e-44	3	Tmed3
183	1.00618e-47	0.87788	0.837	0.295	1.70658e-43	3	Ap3s1
184	1.77051e-47	1.03483	0.965	0.498	3.00297e-43	3	Tuba1b
185	2.59813e-47	1.51856	0.948	0.616	4.40669e-43	3	Chi3l3
186	6.71895e-47	0.895402	0.837	0.303	1.1396e-42	3	Kpna2
187	6.07264e-45	0.890615	0.733	0.224	1.02998e-40	3	Mcm6
188	7.89931e-45	2.56938	0.703	0.248	1.3398e-40	3	Prtn3
189	2.45529e-42	0.910304	0.663	0.188	4.16441e-38	3	Pcna
190	1.46246e-40	3.8043	0.657	0.248	2.48049e-36	3	Elane
191	1.22831e-38	1.20539	0.913	0.539	2.08333e-34	3	Camp
192	1.52295e-36	1.20808	0.61	0.191	2.58307e-32	3	Mt1
193	6.47442e-36	0.895556	0.797	0.309	1.09813e-31	3	Etfb
194	4.19344e-34	3.03152	0.657	0.27	7.1125e-30	3	Mpo
195	9.3847e-31	0.838714	0.634	0.216	1.59174e-26	3	Fdps
196	4.4298e-27	1.02264	0.669	0.336	7.51339e-23	3	Ube2c
197	4.56001e-26	0.94909	0.372	0.089	7.73423e-22	3	Cst7
198	9.03219e-26	2.50826	0.471	0.158	1.53195e-21	3	Ctsg
199	4.8382e-25	1.1895	0.581	0.235	8.20607e-21	3	Gstm1
200	8.26387e-24	0.876083	0.628	0.273	1.40164e-19	3	Hist1h2ap
201	7.91988e-152	1.80361	0.958	0.048	1.34329e-147	4	Ace
202	1.29472e-137	3.07417	0.792	0.028	2.19597e-133	4	Cd300e
203	9.30883e-120	1.63678	0.646	0.015	1.57887e-115	4	Cd36
204	2.41588e-107	2.54951	0.667	0.028	4.09758e-103	4	Eno3
205	9.34003e-105	1.49582	0.844	0.068	1.58416e-100	4	Cd300lh
206	1.41968e-96	2.24483	0.833	0.083	2.40791e-92	4	Gngt2
207	6.65034e-96	1.66087	0.906	0.114	1.12796e-91	4	Abi3
208	7.21035e-95	1.40044	0.938	0.126	1.22295e-90	4	Gm11710
209	7.21035e-95	1.40044	0.938	0.126	1.22295e-90	4	Gm11711
210	9.37006e-91	2.72412	0.865	0.111	1.58926e-86	4	Treml4
211	3.64028e-88	2.3731	0.927	0.146	6.17428e-84	4	Emr4
212	4.07624e-88	1.91834	0.698	0.056	6.91371e-84	4	S1pr5
213	4.01838e-86	1.83675	0.885	0.124	6.81558e-82	4	Cd244
214	5.8114e-81	2.13216	0.562	0.03	9.85672e-77	4	Cd72
215	4.17839e-79	1.61678	0.448	0.012	7.08697e-75	4	Lilra5
216	4.37507e-78	1.75975	0.479	0.017	7.42056e-74	4	Pparg
217	5.62868e-75	2.11659	0.865	0.15	9.54681e-71	4	Cd300ld
218	9.88118e-74	2.4504	0.948	0.217	1.67595e-69	4	Clec4a3
219	2.31162e-70	1.90809	0.562	0.041	3.92074e-66	4	Pltp
220	8.89038e-70	2.56618	0.99	0.289	1.5079e-65	4	Nr4a1
221	5.37264e-64	2.06782	0.635	0.074	9.11253e-60	4	Bcl2a1d
222	1.91539e-56	2.16279	1	0.833	3.24869e-52	4	Cst3
223	1.10234e-53	2.42797	0.688	0.123	1.86969e-49	4	Fcgr4
224	1.4231e-53	1.55692	0.708	0.132	2.41372e-49	4	Adrbk2
225	1.10246e-52	2.41035	0.938	0.394	1.86988e-48	4	Trf
226	6.7979e-49	1.9155	0.802	0.223	1.15299e-44	4	Clec4a1
227	5.70906e-45	1.61669	0.948	0.353	9.68313e-41	4	Pld4
228	2.08425e-44	1.35005	1	0.643	3.5351e-40	4	Gm2a
229	2.24561e-44	2.02507	0.917	0.434	3.80879e-40	4	Csf1r
230	1.5738e-42	1.61387	0.938	0.384	2.66932e-38	4	Ctss
231	2.35775e-42	1.54006	0.958	0.728	3.99898e-38	4	Ctsb
232	4.07858e-42	1.38914	0.333	0.022	6.91768e-38	4	Cd83
233	4.45084e-41	1.37546	0.677	0.164	7.54907e-37	4	Arhgef10l
234	2.2328e-39	1.9649	0.833	0.342	3.78705e-35	4	Cx3cr1
235	1.51656e-36	1.84151	0.729	0.223	2.57224e-32	4	Susd3
236	7.41762e-36	1.76759	0.531	0.106	1.2581e-31	4	Tmem51
237	3.88669e-35	1.34623	0.531	0.094	6.59221e-31	4	Bcl2a1b
238	1.12208e-33	1.4454	0.958	0.602	1.90316e-29	4	Stk10
239	1.83379e-33	1.68939	0.896	0.467	3.11029e-29	4	Myo1g
240	2.62854e-33	1.54017	0.979	0.615	4.45827e-29	4	Ifngr1
241	2.81796e-33	1.77103	0.802	0.341	4.77955e-29	4	Cd68
242	2.4893e-32	1.59305	0.5	0.098	4.22209e-28	4	Hfe
243	2.32782e-31	2.66161	0.49	0.098	3.94822e-27	4	Apoe
244	1.15472e-27	1.57784	0.24	0.019	1.95852e-23	4	Apoc2
245	9.02965e-26	1.74893	0.552	0.169	1.53152e-21	4	Acp5
246	8.39952e-24	1.57161	0.469	0.123	1.42464e-19	4	Nupr1
247	9.03415e-24	1.45248	0.396	0.08	1.53228e-19	4	Fcgrt
248	2.82218e-19	1.35815	0.812	0.529	4.78669e-15	4	Smpdl3a
249	5.05072e-14	1.39737	0.365	0.117	8.56653e-10	4	Slc29a1
250	2.54845e-12	1.68573	0.385	0.136	4.32242e-08	4	Hspa1a
251	1.19353e-143	3.30668	0.925	0.02	2.02434e-139	5	Alox15
252	5.92411e-79	1.81258	0.6	0.018	1.00479e-74	5	Ccr3
253	6.16377e-63	0.92887	0.375	0.006	1.04544e-58	5	Emid1
254	1.15657e-56	6.89049	0.85	0.091	1.96166e-52	5	Prg2
255	3.40461e-55	3.59825	0.6	0.036	5.77455e-51	5	Epx
256	5.61729e-53	3.83933	0.475	0.02	9.52749e-49	5	Prg3
257	2.46103e-37	1.34568	0.275	0.008	4.17416e-33	5	P2ry14
258	1.46547e-31	1.50703	0.55	0.061	2.48558e-27	5	Siglec5
259	1.9432e-30	0.917172	0.3	0.014	3.29587e-26	5	Perp
260	8.72817e-28	2.3628	0.375	0.029	1.48038e-23	5	Adamdec1
261	9.29189e-28	1.16846	0.975	0.307	1.576e-23	5	F5
262	2.24912e-27	1.12309	0.4	0.035	3.81474e-23	5	Adora3
263	4.03393e-27	2.00937	0.975	0.399	6.84195e-23	5	Gapt
264	1.73859e-24	2.42861	0.575	0.094	2.94882e-20	5	Ear12
265	1.73859e-24	2.33121	0.575	0.094	2.94882e-20	5	Ear3
266	2.20445e-24	1.1902	0.55	0.079	3.73897e-20	5	P2rx1
267	2.73217e-24	1.53649	0.475	0.061	4.63404e-20	5	Spns3
268	3.33766e-21	1.61498	0.85	0.298	5.66101e-17	5	Ear11
269	1.36966e-19	1.22467	0.425	0.059	2.32308e-15	5	Rab37
270	6.79495e-19	4.43595	0.85	0.424	1.15249e-14	5	Ear6
271	7.14123e-18	0.962611	0.725	0.196	1.21122e-13	5	Rnf144b
272	3.7417e-17	1.66325	0.875	0.413	6.34629e-13	5	Cd63
273	6.01956e-17	3.57752	0.85	0.463	1.02098e-12	5	Ear10
274	6.4699e-16	3.88435	0.85	0.52	1.09736e-11	5	Ear2
275	1.54708e-15	3.68173	0.825	0.516	2.624e-11	5	Ear1
276	2.1147e-12	1.00869	1	0.895	3.58674e-08	5	Syne1
277	3.70967e-12	1.19347	0.75	0.42	6.29198e-08	5	Il5ra
278	6.0036e-12	1.20727	0.85	0.384	1.01827e-07	5	Camk1
279	2.64035e-11	1.05988	0.65	0.24	4.47829e-07	5	2019-09-01
280	8.00486e-11	1.76612	0.55	0.19	1.3577e-06	5	Dok2
281	2.97413e-10	1.09191	0.4	0.099	5.04442e-06	5	Chst13
282	6.53564e-10	1.18932	0.9	0.529	1.10851e-05	5	Cyp4f18
283	8.8216e-10	0.886043	0.3	0.061	1.49623e-05	5	Selm
284	4.27266e-09	1.00259	0.975	0.721	7.24685e-05	5	Cd24a
285	5.04834e-09	1.31549	0.775	0.441	8.56249e-05	5	Herpud1
286	8.17208e-09	0.883131	0.5	0.188	0.000138607	5	Arsb
287	2.797e-08	1.57429	0.25	0.05	0.000474398	5	Tgm2
288	2.25391e-07	0.957338	0.9	0.612	0.00382286	5	Rps3a1
289	2.80561e-07	0.903546	0.8	0.441	0.0047586	5	Adam8
290	1.31072e-06	0.932504	0.725	0.412	0.0222311	5	Rnh1
291	1.93266e-06	0.87746	0.25	0.061	0.0327799	5	Fam109b
292	6.74325e-06	0.897506	0.425	0.173	0.114372	5	Vcam1
293	2.2107e-05	1.0025	0.825	0.67	0.374958	5	Fut8
294	3.1522e-05	1.26714	0.65	0.414	0.534645	5	Pla2g7
295	3.92234e-05	0.997945	0.9	0.637	0.665269	5	Ccl6
296	5.20241e-05	0.914994	0.475	0.228	0.88238	5	Rgcc
297	8.11261e-05	1.07013	0.375	0.149	1	5	Gpr114
298	0.000816048	0.904849	0.125	0.029	1	5	Rgs1
299	0.00168045	0.945152	0.4	0.207	1	5	Thbs1
300	0.00259525	0.969346	0.475	0.316	1	5	Adss

## Sheet: Fcgr Enrichment
Supplementary Table 5D: Mann-Whitney test on Fcgr expression between cluster groups for p value, cohen's d for effect size
	cluster	p-val <	BF adj p*	difference in mean	Effect size (cohen's d)		*Bonferroni corrected for 48 comparisons in pair-wise comparisions, corrected for 24 comparisons in 1 vs rest
Fcgr1	2v0	2.2e-16	1.056e-14	0.993866	0.875424
	2v1	2.2e-16	1.056e-14	1.00118	0.883095
	2v3	2.2e-16	1.056e-14	1.01125	0.821334
	2v4	2.822e-05	0.00135456	0.585798	0.37865
	2v5	4.481e-06	0.000215088	1.02684	0.695619
	2vrest	2.2e-16	5.28e-15	0.954577	1.04251
Fcgr2b	4v0	0.0002415	0.011592	-0.512578	-0.525766
	4v1	0.00334	0.16032	-0.309868	-0.352668
	4v2	1.322e-07	6.3456e-06	0.530705	-0.571255
	4v3	3.569e-06	0.000171312	-0.462979	-0.546512
	4v5	6.796e-05	0.00326208	-0.743226	-0.933125
	4vrest	3.269e-06	7.8456e-05	-0.464964	-0.468836
Fcgr4	4v0	2.2e-16	1.056e-14	1.93809	1.62914
	4v1	2.2e-16	1.056e-14	1.97923	1.83295
	4v2	2.2e-16	1.056e-14	2.20515	2.36432
	4v3	2.2e-16	1.056e-14	2.14513	2.00933
	4v5	3.563e-10	1.71024e-08	2.24247	1.55824
	4vrest	2.2e-16	5.28e-15	2.06464	2.54432

## Sheet: C0 FindMarkers
Supplementary Table 5E: FindMarkers output for C0
ID	p_val	avg_logFC	pct.1	pct.2	p_val_adj
Sfxn5	1.94525e-126	1.58893	0.878	0.326	3.29933e-122
Csf3r	6.41419e-122	2.08748	0.978	0.857	1.08791e-117
Cxcr2	8.55371e-115	1.89098	0.982	0.96	1.45079e-110
Rps4x	8.89591e-107	-2.34317	0.306	0.849	1.50883e-102
Ccl6	2.85629e-101	1.84669	0.959	0.543	4.84455e-97
Ptma	1.96447e-100	-2.36937	0.288	0.798	3.33194e-96
Ppia	3.08267e-100	-2.13476	0.362	0.862	5.22852e-96
Rps5	1.16891e-98	-2.3851	0.284	0.804	1.98258e-94
Rplp0	4.1059e-96	-1.96275	0.443	0.893	6.96402e-92
Mxd1	3.0222e-94	1.61649	0.923	0.621	5.12595e-90
Uba52	3.17128e-94	-1.68416	0.258	0.84	5.3788e-90
Msrb1	3.67108e-91	0.92067	0.945	0.855	6.22651e-87
Rps26	1.08095e-90	-1.94419	0.203	0.826	1.83341e-86
Rps28	1.25511e-90	-1.94869	0.118	0.759	2.12879e-86
Rpl4	1.75677e-90	-1.96001	0.288	0.78	2.97966e-86
Sell	5.32157e-90	1.63398	0.93	0.777	9.02592e-86
Rpl7	6.42488e-87	-1.62427	0.31	0.811	1.08972e-82
Fth1	1.83568e-85	1.26185	0.959	0.952	3.11351e-81
Rps8	1.22325e-84	-1.83995	0.321	0.823	2.07476e-80
Rpl6	1.66691e-84	-1.53244	0.314	0.833	2.82724e-80
Rpl13	1.87965e-84	-1.77578	0.303	0.809	3.18807e-80
Rps29	1.31409e-83	-1.42984	0.166	0.803	2.22884e-79
Rpl37a	2.25169e-82	-1.49174	0.185	0.752	3.81909e-78
Rps17	8.58062e-82	-1.996	0.148	0.686	1.45536e-77
Retnlg	2.12074e-81	1.80316	0.934	0.553	3.59698e-77
Naca	3.40245e-81	-1.46787	0.155	0.734	5.77089e-77
Gm15772	2.46964e-79	-1.61336	0.144	0.743	4.18876e-75
Rps3a1	2.58799e-79	-1.58338	0.207	0.76	4.38948e-75
Il1f9	2.07421e-78	2.11629	0.723	0.323	3.51807e-74
Rpl3	4.26137e-78	-1.97082	0.284	0.782	7.2277e-74
Lta4h	1.51405e-77	-1.79071	0.177	0.732	2.56798e-73
Rps15a-ps6	6.20575e-77	-0.542398	0.077	0.695	1.05256e-72
Rps18	2.5339e-76	-1.98381	0.173	0.688	4.29775e-72
Cybb	9.31124e-75	-0.960807	0.565	0.963	1.57928e-70
Rpl28	1.18903e-74	-1.61545	0.17	0.749	2.01672e-70
Grina	5.17986e-74	1.76674	0.793	0.462	8.78556e-70
Rpl32	5.54819e-74	-1.78655	0.122	0.642	9.41029e-70
Rps11	6.1386e-74	-1.70643	0.188	0.737	1.04117e-69
Wdr92	7.03837e-74	0.942676	0.963	0.847	1.19378e-69
Rpl10	9.9122e-73	-1.33194	0.458	0.89	1.68121e-68
Rps13	1.64692e-72	-1.45985	0.214	0.771	2.79334e-68
Rps14	2.40067e-72	-1.25333	0.303	0.825	4.07178e-68
Rps19	4.20567e-72	-1.54769	0.214	0.75	7.13323e-68
Ppp1r18	5.16211e-72	0.68994	0.664	0.827	8.75545e-68
Rps6	2.92068e-71	-1.49114	0.376	0.831	4.95376e-67
Eef1a1	8.9296e-71	-1.53699	0.487	0.868	1.51455e-66
Gm12505	1.86252e-69	1.20658	0.915	0.657	3.15903e-65
Rpl29	2.20386e-69	-1.41711	0.192	0.725	3.73797e-65
Rpl41	1.68548e-68	-1.37734	0.232	0.776	2.85873e-64
Malat1	2.9097e-68	0.893142	1	0.998	4.93514e-64
Chi3l3	7.87531e-68	-3.09843	0.343	0.776	1.33573e-63
Rpl35	9.65543e-68	-1.70247	0.162	0.687	1.63766e-63
Rpl11	1.5733e-67	-1.42666	0.185	0.747	2.66847e-63
Rpl14	1.81854e-67	-1.44879	0.196	0.665	3.08442e-63
Rps16	5.90592e-67	-1.47758	0.118	0.672	1.0017e-62
Rps7	6.71299e-67	-1.2672	0.225	0.748	1.13859e-62
Rps15a-ps4	8.17506e-67	-0.480331	0.107	0.687	1.38657e-62
Egr1	1.66657e-65	2.42702	0.491	0.108	2.82667e-61
Ak2	2.31119e-65	-0.932705	0.125	0.698	3.92e-61
Rps24	5.36509e-65	-1.26652	0.207	0.732	9.09973e-61
Rpl18a	1.07291e-64	-1.15301	0.395	0.859	1.81977e-60
Gm16894	1.60114e-64	0.952449	0.542	0.1	2.71569e-60
P4hb	4.17407e-64	-1.54198	0.258	0.725	7.07964e-60
Rpl15	4.89274e-64	-1.05065	0.17	0.681	8.29858e-60
Rps23	1.40742e-63	-1.28033	0.177	0.722	2.38712e-59
Gm8580	1.5647e-63	-0.424984	0.114	0.683	2.65388e-59
Dusp1	1.70202e-63	1.58808	0.948	0.654	2.8868e-59
Rpsa	2.94599e-63	-1.30799	0.114	0.626	4.99669e-59
Rn4.5s	3.37283e-63	-0.889162	0.181	0.754	5.72065e-59
Pdia3	5.82239e-63	-1.2229	0.173	0.652	9.87536e-59
Rpl8	7.34566e-63	-1.27781	0.365	0.799	1.2459e-58
Plac8	1.19742e-62	-1.58024	0.155	0.691	2.03095e-58
Hnrnpa2b1	1.41411e-62	-0.903898	0.395	0.866	2.39847e-58
Hsp90b1	3.45124e-62	-1.18886	0.214	0.7	5.85365e-58
Zfp36	3.98029e-62	1.13175	0.985	0.931	6.75098e-58
Rps3	1.13757e-61	-1.00362	0.314	0.759	1.92942e-57
Trpm2	3.08583e-61	1.07025	0.686	0.234	5.23388e-57
Eif4a1	4.11884e-61	-1.05357	0.221	0.754	6.98596e-57
Rpl24	5.44693e-61	-1.16423	0.162	0.702	9.23854e-57
Tagln2	6.40751e-61	-1.50589	0.107	0.583	1.08678e-56
Kdelr2	1.25871e-60	-0.746747	0.122	0.672	2.1349e-56
Eef2	1.88933e-60	-1.22915	0.428	0.843	3.2045e-56
B4galt1	1.91821e-60	-0.359028	0.428	0.922	3.25347e-56
Rpl10a	1.19817e-59	-1.44628	0.07	0.541	2.03222e-55
Rpl13a	1.81901e-59	-1.13311	0.192	0.7	3.08522e-55
Rpl38	3.28578e-59	-1.26735	0.081	0.598	5.57301e-55
Ccpg1	3.87523e-59	1.52279	0.76	0.551	6.57278e-55
Rps27a	7.71727e-59	-1.06754	0.288	0.787	1.30893e-54
Rps20	2.22042e-58	-1.43514	0.074	0.526	3.76606e-54
Rpl19	6.25209e-58	-1.36365	0.196	0.661	1.06042e-53
Rpl37	1.19355e-57	-0.774503	0.188	0.738	2.02438e-53
Rpl5	1.90034e-57	-1.15821	0.196	0.681	3.22317e-53
Fgl2	3.82675e-57	1.72003	0.576	0.244	6.49055e-53
Ndufa13	1.06738e-56	-0.511388	0.096	0.62	1.81038e-52
Rpl27	1.81138e-56	-1.01856	0.125	0.614	3.07228e-52
Mmp9	2.59331e-56	1.12047	0.904	0.474	4.39851e-52
Tubb5	3.46445e-56	-1.83207	0.498	0.85	5.87605e-52
Eif3f	1.04505e-55	-0.950644	0.221	0.736	1.77251e-51
Ccr1	2.36333e-55	1.79904	0.675	0.351	4.00845e-51
Rpl17	3.17802e-55	-1.02776	0.321	0.811	5.39024e-51
Rps2	6.85004e-55	-1.63145	0.218	0.659	1.16184e-50
Junb	8.78271e-55	1.73182	0.775	0.555	1.48964e-50
Eif3h	1.78736e-54	-1.11492	0.111	0.6	3.03154e-50
S100a11	2.57484e-54	1.19699	0.882	0.814	4.36718e-50
H2afy	5.61074e-54	-0.459776	0.137	0.664	9.51637e-50
Ctsd	1.38221e-53	1.44976	0.886	0.772	2.34437e-49
Erdr1	2.13544e-53	-0.604688	0.044	0.526	3.62192e-49
Slfn1	4.62497e-53	1.65614	0.712	0.359	7.84442e-49
Napsa	6.3851e-53	-0.977116	0.14	0.648	1.08298e-48
Pgls	6.7671e-53	-1.16314	0.059	0.526	1.14777e-48
Pld4	1.63936e-52	-2.11066	0.173	0.482	2.78051e-48
Rpl39	3.48041e-52	-1.30208	0.063	0.525	5.90312e-48
Rpl9	5.39495e-52	-0.915636	0.384	0.826	9.15038e-48
Srsf3	5.45431e-52	-0.923269	0.181	0.657	9.25105e-48
Set	6.02439e-52	-0.764973	0.111	0.596	1.0218e-47
Canx	1.46986e-51	-0.829415	0.162	0.637	2.49303e-47
Atp5o	2.99821e-51	-1.24629	0.055	0.503	5.08526e-47
Mbnl1	5.97153e-51	-0.438756	0.17	0.682	1.01283e-46
Gas7	2.40406e-50	-0.600947	0.203	0.689	4.07753e-46
Mbnl3	2.64658e-50	-0.444297	0.111	0.598	4.48887e-46
Lamtor2	2.79547e-50	-1.05768	0.059	0.535	4.74139e-46
Rpl35a	3.24543e-50	-0.990089	0.244	0.733	5.50457e-46
Atp5h	4.82423e-50	-0.840009	0.096	0.591	8.18237e-46
Trem1	5.34412e-50	1.55544	0.731	0.307	9.06416e-46
Ddost	9.52111e-50	-1.13589	0.114	0.536	1.61488e-45
Rpl36a	1.05641e-49	-1.29628	0.077	0.518	1.79177e-45
Cd47	1.2369e-49	-0.54199	0.41	0.866	2.09791e-45
Ppib	1.39911e-49	-1.06162	0.114	0.593	2.37303e-45
Psme2	1.59574e-49	-0.861523	0.137	0.633	2.70653e-45
Rps15a	2.96467e-49	-0.256289	0.332	0.764	5.02837e-45
Serpinb1a	3.04833e-49	-1.58968	0.266	0.693	5.17026e-45
Cyp4f18	5.25873e-49	1.45567	0.775	0.467	8.91934e-45
Mmp8	6.52246e-49	1.26061	0.867	0.476	1.10627e-44
Rpl34-ps1	9.54739e-49	-1.05588	0.077	0.554	1.61933e-44
Atp5g2	1.24453e-48	-1.07337	0.159	0.609	2.11086e-44
Cox5a	2.0745e-48	-0.996714	0.114	0.58	3.51857e-44
Tuba1b	2.6432e-48	-1.92207	0.277	0.669	4.48314e-44
Ctsb	3.73278e-48	-0.807485	0.439	0.85	6.33117e-44
Dek	3.88214e-48	-0.685445	0.092	0.54	6.58449e-44
Rbm3	7.73241e-48	-0.880542	0.229	0.691	1.31149e-43
Ythdf2	7.96309e-48	-0.388877	0.122	0.61	1.35062e-43
Cbx3	1.02461e-47	-0.867106	0.218	0.693	1.73785e-43
Btg1	1.95142e-47	1.12434	0.882	0.717	3.3098e-43
Lcp1	1.95665e-47	0.991245	0.989	0.985	3.31867e-43
Eif3k	2.58554e-47	-0.954679	0.1	0.566	4.38533e-43
Rps15	2.66563e-47	-0.86474	0.044	0.487	4.52118e-43
Tra2b	3.65589e-47	-0.51682	0.203	0.699	6.20076e-43
Tmem256	4.54307e-47	-0.784003	0.011	0.415	7.7055e-43
H2afz	8.1618e-47	-1.19989	0.494	0.864	1.38432e-42
Rpl36al	1.17894e-46	-1.14911	0.048	0.431	1.99961e-42
Hist1h4d	1.34026e-46	-1.42082	0.037	0.449	2.27321e-42
Cope	1.43072e-46	-0.592857	0.092	0.565	2.42665e-42
Tma7	1.75327e-46	-0.430276	0.1	0.547	2.97372e-42
Eif5a	4.33393e-46	-0.74886	0.413	0.84	7.35078e-42
Ywhae	5.19789e-46	-0.620889	0.162	0.647	8.81613e-42
Elovl5	6.22537e-46	-0.698895	0.048	0.47	1.05589e-41
Rps25	8.98085e-46	-0.878363	0.199	0.666	1.52324e-41
Ran	1.15065e-45	-0.891999	0.133	0.546	1.95162e-41
Metap2	1.47676e-45	-0.41035	0.092	0.542	2.50473e-41
Etfb	2.29751e-45	-1.00323	0.059	0.493	3.89681e-41
Ndufa3	3.07842e-45	-0.521261	0.1	0.543	5.22131e-41
Slfn4	4.35777e-45	1.54857	0.808	0.558	7.39121e-41
2700089E24Rik	4.60387e-45	-0.307376	0.041	0.468	7.80863e-41
Rnaset2a	5.57535e-45	-0.681158	0.21	0.697	9.45634e-41
Sub1	5.93524e-45	-0.30165	0.166	0.65	1.00668e-40
Ddx39b	7.90875e-45	-0.826321	0.07	0.51	1.3414e-40
Cox4i1	8.44506e-45	-0.733496	0.31	0.772	1.43237e-40
Cd33	1.00414e-44	1.30472	0.841	0.574	1.70312e-40
Ssrp1	1.25794e-44	-0.571063	0.052	0.475	2.1336e-40
Amica1	1.61028e-44	1.67881	0.476	0.116	2.7312e-40
Atp5a1	1.74168e-44	-0.866758	0.232	0.654	2.95407e-40
Gstp1	2.17358e-44	-0.785399	0.063	0.504	3.68661e-40
Psma7	2.21137e-44	-1.05448	0.229	0.636	3.7507e-40
Cox6c	2.45404e-44	-0.849738	0.055	0.484	4.1623e-40
Tspo	2.61329e-44	-0.656741	0.303	0.764	4.43239e-40
Anapc5	3.15109e-44	-0.839173	0.1	0.525	5.34456e-40
Sumo2	3.18402e-44	-0.724501	0.203	0.66	5.40042e-40
Ndufa6	4.1044e-44	-0.666722	0.1	0.554	6.96148e-40
Rplp2	4.53333e-44	-0.845255	0.092	0.549	7.68899e-40
Cybasc3	4.66846e-44	-0.775984	0.059	0.475	7.91818e-40
Btf3	6.63286e-44	-0.805683	0.177	0.643	1.125e-39
Spcs2	7.04243e-44	-0.63669	0.125	0.577	1.19447e-39
Tmsb10	7.60888e-44	-1.39551	0.269	0.716	1.29054e-39
Snrpb	9.74104e-44	-1.00779	0.144	0.574	1.65218e-39
Cct5	1.52617e-43	-1.01637	0.1	0.51	2.58854e-39
Rpl18	2.30041e-43	-0.877627	0.14	0.593	3.90173e-39
Jun	2.4176e-43	-0.933375	0.188	0.613	4.10049e-39
Rpn2	2.43072e-43	-0.986235	0.118	0.509	4.12275e-39
Hsp90ab1	4.52522e-43	-0.927515	0.402	0.798	7.67522e-39
Cd81	4.70092e-43	-1.19303	0.085	0.503	7.97323e-39
Crip1	7.42194e-43	-1.80275	0.033	0.4	1.25884e-38
Rpl21	8.52852e-43	-0.684932	0.207	0.672	1.44652e-38
Pcnp	9.58825e-43	-0.443151	0.203	0.678	1.62626e-38
Srgn	1.18403e-42	1.34173	0.812	0.529	2.00824e-38
C5ar1	1.20295e-42	1.39353	0.808	0.512	2.04032e-38
Smim14	1.43317e-42	-0.279567	0.107	0.523	2.43079e-38
Cox5b	1.43819e-42	-0.958174	0.114	0.548	2.43932e-38
Lamp1	1.68185e-42	-0.827524	0.173	0.631	2.85258e-38
Hint1	1.86011e-42	-1.09437	0.044	0.432	3.15493e-38
Npm1	2.67019e-42	-1.14564	0.107	0.487	4.52891e-38
BC147527	3.97233e-42	-0.305748	0.125	0.58	6.73747e-38
Park7	4.1157e-42	-1.01862	0.074	0.468	6.98064e-38
Ftl1	7.21652e-42	0.606873	1	1	1.22399e-37
Uqcrb	7.5365e-42	-0.923682	0.026	0.406	1.27827e-37
C330006A16Rik	8.19522e-42	-0.751177	0.114	0.531	1.38999e-37
Sod1	9.15569e-42	-0.940002	0.129	0.585	1.5529e-37
Zfp706	1.09001e-41	-0.492779	0.214	0.671	1.84876e-37
Sh3bgrl	1.14812e-41	-0.692758	0.092	0.521	1.94733e-37
Ctsz	1.36979e-41	-1.18389	0.314	0.682	2.3233e-37
Gnb2l1	1.76e-41	-1.11091	0.114	0.515	2.98514e-37
Banf1	1.85802e-41	-1.06422	0.063	0.454	3.15139e-37
Rpl31	2.02743e-41	-0.439193	0.048	0.46	3.43873e-37
Ndufa4	2.9114e-41	-1.10658	0.085	0.454	4.93802e-37
Smarca4	4.19977e-41	-0.276488	0.037	0.434	7.12322e-37
Rpn1	4.56926e-41	-0.650933	0.196	0.624	7.74992e-37
Rpl23	4.81874e-41	-0.811125	0.387	0.717	8.17307e-37
Hexb	5.09501e-41	-0.658376	0.044	0.451	8.64164e-37
Rpl22	5.95949e-41	-0.285641	0.037	0.428	1.01079e-36
Slc16a3	6.80042e-41	1.33256	0.624	0.432	1.15342e-36
Psmb6	6.98857e-41	-0.729838	0.1	0.527	1.18533e-36
Scp2	7.82302e-41	-0.255653	0.328	0.784	1.32686e-36
Tmed3	1.00317e-40	-0.873813	0.089	0.518	1.70147e-36
Mdh1	1.03069e-40	-0.755164	0.033	0.391	1.74815e-36
Rpl27a	1.29334e-40	-0.61683	0.151	0.608	2.19363e-36
Stmn1	1.55872e-40	-1.17518	0.085	0.447	2.64374e-36
Ap2a2	2.58324e-40	-0.309527	0.17	0.627	4.38143e-36
Tceb2	2.719e-40	-0.361533	0.17	0.609	4.61169e-36
Calm1	3.11918e-40	-0.37663	0.694	0.974	5.29045e-36
Golt1b	3.89881e-40	-0.505417	0.03	0.39	6.61277e-36
Abcc5	4.55411e-40	-0.445796	0.081	0.508	7.72422e-36
G3bp1	4.75376e-40	-0.702249	0.092	0.484	8.06285e-36
Cdk2ap2	4.8367e-40	1.2332	0.708	0.799	8.20352e-36
Anp32b	6.19226e-40	-0.779158	0.092	0.508	1.05027e-35
Taldo1	9.0223e-40	0.948118	0.904	0.922	1.53027e-35
Snrpd3	9.17397e-40	-0.782428	0.041	0.426	1.556e-35
Gm12191	9.64886e-40	-0.92853	0.077	0.49	1.63654e-35
Ltb4r1	9.97044e-40	-0.901951	0.199	0.65	1.69109e-35
Atpif1	1.21657e-39	-0.741834	0.074	0.491	2.06342e-35
Dad1	1.23415e-39	-0.872655	0.1	0.49	2.09323e-35
Nup210	1.30485e-39	-0.387574	0.063	0.441	2.21316e-35
Cox7c	1.38515e-39	-0.588437	0.081	0.504	2.34935e-35
Ptp4a2	1.45364e-39	-0.52269	0.635	0.934	2.46551e-35
Rpl7a	1.63327e-39	-0.801319	0.177	0.607	2.77019e-35
Atp5d	1.70971e-39	-0.814807	0.148	0.58	2.89983e-35
Ms4a6c	1.81786e-39	-1.65253	0.336	0.619	3.08328e-35
Ifngr1	1.87596e-39	-0.993559	0.343	0.748	3.18182e-35
Erh	2.03873e-39	-0.949782	0.048	0.428	3.45788e-35
Rpl26	2.09731e-39	-0.735423	0.033	0.418	3.55725e-35
Fam96a	2.7096e-39	-0.946084	0.148	0.504	4.59575e-35
Hmgb1	3.06856e-39	-0.923978	0.461	0.816	5.20459e-35
AI662270	3.53961e-39	-0.62243	0.048	0.426	6.00353e-35
Anxa5	4.42688e-39	-0.977282	0.181	0.603	7.50844e-35
Eif2s2	4.51619e-39	-0.397852	0.092	0.512	7.65991e-35
Sec61a1	6.11926e-39	-0.594025	0.21	0.642	1.03789e-34
S100a9	7.85143e-39	0.487285	0.993	0.773	1.33168e-34
Zmpste24	8.05887e-39	-0.867593	0.055	0.437	1.36687e-34
Pomp	9.92928e-39	-0.82403	0.07	0.471	1.68411e-34
Rpl22l1	1.02666e-38	-0.778243	0.059	0.459	1.74132e-34
Snrpg	1.1216e-38	-0.861164	0.011	0.357	1.90235e-34
Gatm	1.19749e-38	-0.739134	0.111	0.508	2.03106e-34
Btg2	1.20506e-38	1.32482	0.705	0.575	2.0439e-34
Dbi	1.29586e-38	-0.863732	0.044	0.43	2.19791e-34
Ap2m1	1.33473e-38	-0.605815	0.299	0.713	2.26383e-34
Otub1	1.44324e-38	-0.330991	0.255	0.706	2.44788e-34
Tpr	1.47523e-38	-0.28218	0.144	0.582	2.50214e-34
Rps10	1.94306e-38	-0.776575	0.122	0.542	3.29562e-34
Me2	2.39195e-38	-0.660026	0.137	0.566	4.05698e-34
Gnas	2.45153e-38	-0.425014	0.111	0.54	4.15804e-34
Stra13	2.53908e-38	-0.716607	0.007	0.345	4.30653e-34
Spcs1	3.13946e-38	-0.642222	0.033	0.392	5.32484e-34
Ssr2	3.43194e-38	-0.879226	0.041	0.384	5.82092e-34
Mrgpra2a	4.42745e-38	0.929198	0.797	0.571	7.5094e-34
Serbp1	4.45803e-38	-0.275824	0.151	0.59	7.56127e-34
Ppp2r5c	4.60806e-38	-0.596749	0.17	0.609	7.81573e-34
Spcs3	5.20006e-38	-0.659731	0.059	0.415	8.81981e-34
Ndufa2	5.69209e-38	-0.598103	0.077	0.481	9.65435e-34
Cdk4	8.98299e-38	-1.04618	0.07	0.397	1.5236e-33
Psmb1	1.3425e-37	-0.627834	0.137	0.57	2.27701e-33
Ssb	1.59759e-37	-0.440095	0.063	0.458	2.70967e-33
Nudc	1.83449e-37	-0.742206	0.052	0.419	3.11148e-33
Ssr1	2.10697e-37	-0.439191	0.631	0.892	3.57364e-33
Lrmp	2.27209e-37	-0.338798	0.229	0.674	3.85369e-33
Cox6b1	2.30537e-37	-0.737048	0.111	0.533	3.91014e-33
Psme1	2.33503e-37	-0.652603	0.077	0.484	3.96045e-33
S100a8	2.46673e-37	0.453992	0.993	0.809	4.18382e-33
Eif3l	2.46891e-37	-0.852242	0.066	0.43	4.18752e-33
Clasp2	2.7163e-37	-0.272907	0.103	0.499	4.60712e-33
1810037I17Rik	3.30653e-37	-0.383075	0.089	0.488	5.6082e-33
Psmb2	4.90897e-37	-0.739246	0.081	0.487	8.3261e-33
Rplp1	4.95027e-37	-0.848846	0.077	0.481	8.39616e-33
Ndufb7	5.37684e-37	-0.419836	0.155	0.583	9.11965e-33
Gdi2	6.66735e-37	-0.409197	0.314	0.752	1.13085e-32
Cd300lf	9.63732e-37	1.1424	0.738	0.62	1.63459e-32
Kdm6b	1.10464e-36	0.488339	0.934	0.912	1.87358e-32
Cd101	1.22089e-36	1.44853	0.321	0.051	2.07075e-32
Hcfc1	1.2627e-36	-0.260992	0.089	0.487	2.14167e-32
C3	1.26865e-36	-0.526928	0.28	0.72	2.15175e-32
Cops6	1.37574e-36	-0.864784	0.07	0.431	2.33339e-32
Swi5	1.79731e-36	-0.783846	0.066	0.454	3.04842e-32
Cmtm6	2.04829e-36	1.20374	0.69	0.616	3.4741e-32
Fbxl5	2.2365e-36	1.31399	0.653	0.482	3.79333e-32
Aprt	2.44341e-36	-0.70956	0.144	0.569	4.14427e-32
Tmem14c	2.96635e-36	-0.259674	0.052	0.407	5.03122e-32
Slc25a3	3.05749e-36	-0.84257	0.266	0.639	5.18581e-32
Siva1	3.26325e-36	-0.94516	0.033	0.357	5.5348e-32
Atp5g3	3.4484e-36	-0.389536	0.081	0.481	5.84883e-32
2019-09-15	3.50065e-36	-0.716165	0.041	0.396	5.93746e-32
Tpi1	3.55796e-36	-0.713018	0.066	0.454	6.03466e-32
Gm10094	3.70758e-36	-0.355294	0.125	0.526	6.28843e-32
Ppp2r4	3.75976e-36	-0.613077	0.107	0.498	6.37693e-32
Rnf44	4.2631e-36	0.394964	0.461	0.582	7.23064e-32
Sec61b	4.41676e-36	-0.530588	0.14	0.563	7.49126e-32
Cox8a	4.695e-36	-0.326073	0.31	0.739	7.96319e-32
Slc2a3	5.0292e-36	1.35819	0.683	0.406	8.53003e-32
Slpi	5.22669e-36	0.860322	0.513	0.625	8.86499e-32
Scarb1	5.36969e-36	-0.867862	0.07	0.392	9.10754e-32
Cotl1	5.70695e-36	0.2798	0.428	0.759	9.67955e-32
Emp3	6.28557e-36	-0.45637	0.269	0.706	1.0661e-31
Slc37a1	6.31508e-36	-0.356466	0.066	0.456	1.0711e-31
Elmo2	6.76603e-36	-0.792365	0.218	0.554	1.14759e-31
Ssr3	7.89288e-36	-0.570548	0.089	0.481	1.33871e-31
1500032L24Rik	9.14016e-36	-0.732933	0.066	0.452	1.55026e-31
Ndufb3	9.49398e-36	-0.761637	0.037	0.391	1.61027e-31
Sptssa	1.06863e-35	-0.6742	0.041	0.387	1.81251e-31
Krtcap2	1.09227e-35	-1.00215	0.03	0.353	1.8526e-31
Kpna2	1.10961e-35	-1.31272	0.122	0.475	1.88201e-31
Ssr4	1.21341e-35	-0.963903	0.074	0.437	2.05807e-31
Cct7	1.44243e-35	-0.777116	0.107	0.44	2.4465e-31
Atp5k	1.61115e-35	-0.511514	0.044	0.403	2.73267e-31
Atp5c1	1.62021e-35	-0.568067	0.247	0.666	2.74803e-31
Ap2s1	1.81777e-35	-0.670285	0.089	0.487	3.08312e-31
Ier2	1.83885e-35	0.968057	0.79	0.843	3.11888e-31
Ctss	2.08206e-35	-1.67592	0.218	0.503	3.53139e-31
Ywhab	2.14944e-35	-0.519135	0.351	0.753	3.64567e-31
Esyt1	2.24414e-35	-0.588981	0.052	0.4	3.80629e-31
Il1b	3.19608e-35	2.33972	0.41	0.135	5.42087e-31
Clec4d	3.34242e-35	1.43473	0.321	0.051	5.66907e-31
Akr1a1	3.46725e-35	-0.812875	0.203	0.592	5.8808e-31
Ndufa12	3.49277e-35	-0.791116	0.07	0.449	5.92409e-31
Hist1h2bq	3.50173e-35	0.538425	0.188	0.183	5.93928e-31
Hist1h2br	3.51565e-35	0.538374	0.188	0.183	5.96289e-31
Ceacam2	3.5509e-35	-0.388835	0.325	0.753	6.02268e-31
Prelid1	3.85451e-35	-0.833004	0.092	0.469	6.53763e-31
Rab7	5.17507e-35	0.261497	0.269	0.593	8.77743e-31
Dtymk	5.73908e-35	-0.715697	0.03	0.357	9.73405e-31
Usp5	6.06045e-35	-0.57282	0.07	0.42	1.02791e-30
Prr13	6.71597e-35	0.970849	0.838	0.866	1.1391e-30
Sec61g	6.81071e-35	-0.483971	0.044	0.404	1.15516e-30
Ceacam10	7.40582e-35	0.380011	0.277	0.642	1.2561e-30
Vim	8.22012e-35	-0.682926	0.565	0.875	1.39421e-30
Mrpl33	8.80341e-35	0.534238	0.28	0.519	1.49315e-30
Aldh9a1	9.05495e-35	-0.658614	0.048	0.369	1.53581e-30
1700037H04Rik	9.43631e-35	-0.325866	0.041	0.38	1.60049e-30
Ndufb10	1.13393e-34	-0.621919	0.048	0.41	1.92326e-30
Acer3	1.20633e-34	-0.365995	0.07	0.445	2.04605e-30
Atp5b	1.22249e-34	-0.672619	0.28	0.685	2.07346e-30
Paics	1.44827e-34	-0.765822	0.052	0.367	2.45642e-30
Fkbp2	1.57817e-34	-0.635403	0.033	0.384	2.67673e-30
Ewsr1	1.83719e-34	-0.337234	0.203	0.629	3.11606e-30
Uqcrq	1.9287e-34	-0.759162	0.122	0.525	3.27126e-30
Snd1	2.1355e-34	-0.427051	0.059	0.419	3.62202e-30
Eif4g2	2.14195e-34	-0.303067	0.498	0.853	3.63295e-30
Ear1	2.18352e-34	-1.90897	0.218	0.63	3.70347e-30
Atp5j	2.36376e-34	-0.521437	0.092	0.482	4.00918e-30
Plscr3	3.04215e-34	-0.339434	0.022	0.343	5.1598e-30
Cdv3	3.11185e-34	-0.432173	0.122	0.516	5.27801e-30
Slc25a5	3.17038e-34	-0.729977	0.458	0.801	5.37728e-30
Snrpf	3.43421e-34	-0.478798	0.033	0.356	5.82476e-30
Selplg	3.46848e-34	1.17541	0.841	0.769	5.8829e-30
Etfa	4.28406e-34	-0.733659	0.077	0.424	7.26619e-30
Sumo1	4.63284e-34	-0.362713	0.17	0.579	7.85775e-30
Fpr1	4.64412e-34	1.45318	0.605	0.255	7.8769e-30
Myl6	6.4114e-34	-0.339415	0.646	0.938	1.08744e-29
Calr	7.20498e-34	-0.849072	0.044	0.378	1.22204e-29
Tifab	7.40196e-34	-0.656607	0.081	0.397	1.25545e-29
Fxyd5	7.56326e-34	1.07133	0.852	0.8	1.2828e-29
Atp6v0b	8.193e-34	-0.436764	0.232	0.654	1.38962e-29
Nmt1	8.58464e-34	-0.496807	0.107	0.503	1.45604e-29
Gusb	8.66831e-34	-0.646238	0.063	0.403	1.47023e-29
M6pr	8.99402e-34	-0.721366	0.111	0.48	1.52548e-29
Xbp1	9.01378e-34	-0.679586	0.148	0.546	1.52883e-29
Cks1b	1.12343e-33	-0.906017	0.037	0.323	1.90545e-29
Hvcn1	1.18253e-33	-0.73288	0.096	0.476	2.00568e-29
Tsc22d4	1.62645e-33	0.279363	0.432	0.711	2.75862e-29
Mtus1	1.64868e-33	0.993753	0.657	0.579	2.79632e-29
Cuta	1.86903e-33	-0.481599	0.03	0.347	3.17006e-29
Ccnb2	1.87668e-33	-1.05171	0.059	0.381	3.18304e-29
Cmtm7	2.09678e-33	-0.36055	0.262	0.682	3.55635e-29
Eif3m	2.12598e-33	-0.735842	0.048	0.384	3.60588e-29
Ndufv3	2.38472e-33	-0.627526	0.059	0.424	4.04473e-29
Abracl	2.39483e-33	-0.375284	0.085	0.457	4.06187e-29
Chchd2	2.44967e-33	-0.457896	0.284	0.703	4.15488e-29
Eif3e	2.48415e-33	-0.7029	0.044	0.352	4.21336e-29
Dnmt1	3.0433e-33	-0.342755	0.048	0.39	5.16175e-29
Mrgpra2b	3.10147e-33	1.14133	0.786	0.532	5.2604e-29
H2afx	3.27905e-33	-0.944928	0.081	0.397	5.56159e-29
Ltf	3.72141e-33	-2.75587	0.506	0.716	6.31189e-29
Mrpl18	3.77803e-33	-0.639229	0.089	0.463	6.40792e-29
Ear2	3.83529e-33	-2.39908	0.255	0.624	6.50503e-29
Dstn	3.98026e-33	-0.552671	0.443	0.831	6.75092e-29
S100a6	3.98494e-33	0.88893	0.664	0.588	6.75886e-29
S100a10	4.01941e-33	-1.60044	0.085	0.341	6.81733e-29
Snrpe	4.14724e-33	-0.706118	0.037	0.363	7.03413e-29
Ass1	4.35311e-33	-0.443554	0	0.272	7.38331e-29
Atp5j2	5.25176e-33	-0.553622	0.059	0.42	8.90751e-29
Eef1d	5.58188e-33	-0.667783	0.081	0.425	9.46742e-29
Tmed9	6.02898e-33	-0.653994	0.089	0.453	1.02257e-28
Cebpe	7.03652e-33	-0.826839	0.1	0.484	1.19346e-28
Uqcrc1	8.10634e-33	-0.676076	0.181	0.572	1.37492e-28
Bzw1	9.39451e-33	-0.286864	0.103	0.49	1.5934e-28
Tacc3	9.44696e-33	-0.699921	0.074	0.387	1.6023e-28
Ctsh	1.13682e-32	-0.74166	0.221	0.626	1.92816e-28
Nlrp3	1.20668e-32	0.927731	0.498	0.172	2.04665e-28
Ubl5	1.29687e-32	0.294031	0.221	0.536	2.19962e-28
Sdf2l1	1.39652e-32	-1.04243	0.066	0.384	2.36863e-28
Sirpb1b	1.5754e-32	1.44645	0.609	0.273	2.67204e-28
Pabpc1	1.72721e-32	-0.375103	0.494	0.847	2.92953e-28
Dhrs9	1.96247e-32	0.86458	0.351	0.054	3.32854e-28
Ranbp1	2.01887e-32	-0.900977	0.077	0.395	3.4242e-28
Tm9sf4	2.12725e-32	-0.337005	0.177	0.586	3.60802e-28
Anp32e	2.1759e-32	-0.386187	0.063	0.39	3.69054e-28
Coro7	2.30587e-32	-0.407346	0.295	0.709	3.91098e-28
Nme1	2.46209e-32	-0.674015	0.037	0.353	4.17595e-28
Ssna1	2.54366e-32	-0.522364	0.085	0.459	4.31431e-28
Slc25a39	2.7564e-32	-0.777482	0.14	0.475	4.67513e-28
Adam8	2.97894e-32	1.22863	0.701	0.373	5.05257e-28
Nudt3	3.06451e-32	-0.41189	0.07	0.429	5.19772e-28
Cdc37	3.60477e-32	-0.53241	0.103	0.454	6.11405e-28
Csnk2b	3.91362e-32	-0.255223	0.177	0.576	6.63789e-28
Cd48	3.9192e-32	-1.06527	0.066	0.381	6.64735e-28
Eef1g	3.99633e-32	-0.863624	0.148	0.508	6.77817e-28
Adipor1	4.09883e-32	1.1694	0.863	0.799	6.95202e-28
Trmt112	4.11928e-32	-0.368198	0.118	0.508	6.98672e-28
Timm23	4.70978e-32	-0.747195	0.059	0.386	7.98826e-28
Tor1a	4.98539e-32	-0.538313	0.089	0.464	8.45572e-28
Hspa8	5.18923e-32	-0.781478	0.657	0.9	8.80145e-28
H2afv	5.23339e-32	-0.469927	0.107	0.486	8.87636e-28
Srsf6	6.01254e-32	-0.328577	0.089	0.462	1.01979e-27
Tpt1	6.35028e-32	-0.373569	0.299	0.71	1.07707e-27
Hist2h2aa1	6.60371e-32	1.08901	0.446	0.412	1.12005e-27
Ndufa10	6.62117e-32	-0.749206	0.044	0.373	1.12302e-27
Top2a	8.13359e-32	-0.713005	0.107	0.413	1.37954e-27
Ndufb11	8.24545e-32	-0.547699	0.103	0.485	1.39851e-27
Romo1	8.28152e-32	-0.519879	0.03	0.356	1.40463e-27
Cdca8	8.66272e-32	-0.818178	0.063	0.335	1.46928e-27
Dap	9.72659e-32	-0.505912	0.122	0.51	1.64973e-27
Caprin1	1.10612e-31	-0.334269	0.103	0.484	1.87608e-27
2010107E04Rik	1.13669e-31	-0.702359	0.055	0.406	1.92795e-27
Arl6ip5	1.17248e-31	-0.542912	0.166	0.565	1.98864e-27
Ppm1h	1.21668e-31	-0.296546	0.151	0.547	2.06361e-27
Mcm7	1.35765e-31	-0.650113	0.041	0.345	2.30272e-27
Gstm1	1.37181e-31	-1.15539	0.055	0.367	2.32672e-27
Gm5424	1.40179e-31	-0.95121	0.1	0.352	2.37757e-27
Atp5g1	1.62245e-31	-0.765557	0.041	0.358	2.75183e-27
Hnrnpf	1.74602e-31	-0.459881	0.384	0.767	2.96142e-27
Commd1	1.82188e-31	-0.46939	0.059	0.41	3.09009e-27
Samm50	1.89079e-31	-0.721329	0.037	0.345	3.20697e-27
Nudt21	1.97406e-31	-0.536515	0.033	0.359	3.3482e-27
Ly86	2.18472e-31	-1.17594	0.048	0.32	3.70551e-27
Tmem258	2.35996e-31	-0.688031	0.055	0.402	4.00273e-27
Spn	2.38901e-31	-0.266169	0.033	0.354	4.052e-27
Stt3a	2.57612e-31	-0.574475	0.089	0.447	4.36935e-27
Fam173a	2.64204e-31	-0.53806	0.022	0.335	4.48116e-27
Tmem216	2.82036e-31	-0.810378	0.004	0.278	4.78362e-27
BC028528	3.00752e-31	-0.771172	0.033	0.359	5.10105e-27
Stk17b	3.30627e-31	1.02173	0.657	0.457	5.60777e-27
2810417H13Rik	3.5625e-31	-0.535547	0.159	0.454	6.04236e-27
Cyc1	3.89175e-31	-0.888156	0.055	0.376	6.6008e-27
Flot2	3.95506e-31	-0.413944	0.188	0.59	6.70818e-27
Fdps	4.09618e-31	-0.856677	0.048	0.359	6.94753e-27
Copz1	4.61472e-31	-0.401861	0.181	0.581	7.82703e-27
Reep5	4.72965e-31	-0.360833	0.214	0.619	8.02195e-27
Bax	4.89744e-31	-0.536846	0.048	0.38	8.30655e-27
Rtp4	5.18335e-31	1.51853	0.428	0.149	8.79148e-27
Ostc	5.43692e-31	-0.712527	0.026	0.34	9.22156e-27
Coro1b	5.45683e-31	-0.576235	0.292	0.671	9.25533e-27
Niacr1	5.75407e-31	1.85919	0.299	0.056	9.75948e-27
Ear6	6.45601e-31	-1.7001	0.148	0.536	1.095e-26
Rrp1	7.07239e-31	-0.758943	0.063	0.368	1.19955e-26
Ube2v1	7.4398e-31	-0.56275	0.129	0.509	1.26187e-26
Irf8	7.58808e-31	-0.80102	0.07	0.348	1.28701e-26
Ctsc	7.70859e-31	-1.4381	0.17	0.428	1.30745e-26
Mki67	7.84315e-31	-0.26352	0.077	0.423	1.33028e-26
Rps27l	8.31308e-31	-0.389631	0.055	0.379	1.40998e-26
Slfn2	8.45117e-31	1.01537	0.727	0.778	1.4334e-26
Srp9	9.25178e-31	-0.308813	0.085	0.445	1.56919e-26
Cox6a1	1.06019e-30	-0.575662	0.103	0.476	1.7982e-26
Ilf3	1.0906e-30	-0.352102	0.048	0.374	1.84977e-26
Cap1	1.13591e-30	0.622364	0.889	0.946	1.92661e-26
Pnp	1.20786e-30	-0.387943	0.018	0.301	2.04866e-26
Dnajc9	1.32834e-30	-0.692351	0.041	0.322	2.25299e-26
Rassf4	1.36804e-30	-0.486115	0.1	0.428	2.32033e-26
Ms4a4c	1.64802e-30	-1.04052	0.074	0.357	2.79521e-26
Pigt	1.88485e-30	-0.657984	0.07	0.391	3.1969e-26
Gm20594	1.98596e-30	-0.453505	0.679	0.954	3.36839e-26
Glud1	2.08339e-30	-0.539381	0.247	0.637	3.53364e-26
Mrps14	2.10848e-30	-0.320921	0.059	0.403	3.57619e-26
Gm10845	2.12293e-30	0.348635	0.97	0.972	3.6007e-26
Pdcd4	2.14367e-30	-0.29894	0.244	0.646	3.63587e-26
Smc4	2.3696e-30	-0.323759	0.096	0.462	4.01908e-26
Npc2	2.59615e-30	-0.678059	0.258	0.635	4.40333e-26
Pgam1	2.83198e-30	-0.361716	0.262	0.664	4.80332e-26
Pisd-ps1	2.8507e-30	0.646944	0.188	0.312	4.83508e-26
BC002163	3.48919e-30	-0.51754	0.052	0.385	5.91802e-26
Ociad1	4.14848e-30	-0.433237	0.081	0.437	7.03624e-26
Asf1b	4.42532e-30	-0.849168	0.052	0.333	7.50578e-26
Cxcr4	4.44206e-30	0.595897	0.908	0.945	7.53418e-26
Mfsd1	4.49565e-30	-0.518866	0.066	0.407	7.62507e-26
Myo1g	4.68589e-30	-0.73251	0.214	0.6	7.94774e-26
2700060E02Rik	4.93344e-30	-0.565874	0.033	0.347	8.3676e-26
Ndufv2	5.04395e-30	-0.58708	0.081	0.428	8.55504e-26
Sarnp	5.62176e-30	-0.541424	0.096	0.458	9.53507e-26
Impdh2	6.27645e-30	-0.894746	0.074	0.369	1.06455e-25
Myeov2	6.27846e-30	-0.577313	0.063	0.406	1.06489e-25
Tyrobp	6.3628e-30	0.821417	0.97	0.965	1.07919e-25
Ndufc2	6.47589e-30	-0.553075	0.015	0.302	1.09837e-25
Rer1	6.72896e-30	-0.298068	0.107	0.47	1.1413e-25
Sephs2	7.18523e-30	1.30761	0.871	0.741	1.21869e-25
Ndufa1	7.3484e-30	-0.721644	0.033	0.347	1.24636e-25
Ccdc115	7.45772e-30	-0.560487	0.033	0.326	1.2649e-25
Ndufc1	8.14953e-30	-0.54465	0.015	0.302	1.38224e-25
Tbcb	8.21932e-30	-0.563911	0.037	0.356	1.39408e-25
Prtn3	8.75654e-30	-2.21903	0.085	0.397	1.4852e-25
Camp	9.80247e-30	-2.57887	0.432	0.653	1.6626e-25
Psmd14	9.94934e-30	-0.612128	0.063	0.401	1.68751e-25
Cpne3	1.01634e-29	-0.267994	0.125	0.501	1.72381e-25
Eif3i	1.08653e-29	-0.76995	0.048	0.329	1.84286e-25
Rps6ka1	1.13653e-29	-0.26843	0.343	0.737	1.92766e-25
Ero1l	1.21207e-29	-0.323977	0.052	0.382	2.0558e-25
Rnh1	1.28072e-29	-0.817944	0.151	0.513	2.17222e-25
Tmed10	1.34046e-29	-0.302267	0.236	0.632	2.27356e-25
Psmc3	1.50423e-29	-0.538152	0.103	0.46	2.55132e-25
Eif3c	1.61324e-29	-0.475705	0.096	0.443	2.73621e-25
Ube2l3	1.62233e-29	-0.264892	0.162	0.546	2.75164e-25
Ddx39	1.71984e-29	-0.836493	0.089	0.373	2.91703e-25
Rrm2	1.7251e-29	-1.0233	0.074	0.368	2.92594e-25
Glrx3	1.74091e-29	-0.441623	0.018	0.308	2.95275e-25
Manf	1.87256e-29	-0.370366	0.037	0.32	3.17605e-25
Snx5	2.31282e-29	-0.628697	0.055	0.37	3.92277e-25
Timm13	2.85202e-29	-0.431526	0.037	0.309	4.83732e-25
Ghitm	2.8717e-29	-0.428739	0.218	0.593	4.8707e-25
Dpysl2	3.09931e-29	-0.513345	0.1	0.381	5.25674e-25
Uqcrfs1	3.56546e-29	-0.645879	0.111	0.464	6.04738e-25
Commd3	3.64864e-29	-0.717922	0.022	0.292	6.18846e-25
Taok3	3.69499e-29	-0.272714	0.177	0.563	6.26708e-25
Ly6c1	3.72883e-29	-1.12598	0.513	0.752	6.32448e-25
B3gnt2	3.87378e-29	-0.327414	0.107	0.464	6.57031e-25
Grn	3.99524e-29	-0.400811	0.299	0.691	6.77632e-25
Cdc42se1	4.33651e-29	0.751599	0.613	0.727	7.35516e-25
Snrpd1	4.36269e-29	-0.726168	0.044	0.331	7.39956e-25
Atp2a3	4.90257e-29	-0.376355	0.196	0.582	8.31525e-25
Srsf7	5.19471e-29	-0.415791	0.07	0.409	8.81074e-25
Lgals1	5.31077e-29	-1.52356	0.17	0.4	9.0076e-25
Stfa2l1	5.41686e-29	1.57747	0.273	0.034	9.18753e-25
Gpx1	6.00062e-29	-0.401709	0.531	0.866	1.01777e-24
Kras	6.3775e-29	0.306873	0.956	0.788	1.08169e-24
Cdk2	6.60157e-29	-0.352723	0.089	0.44	1.11969e-24
Ldha	6.88309e-29	-0.290111	0.487	0.84	1.16744e-24
Txn2	7.32126e-29	-0.599523	0.07	0.398	1.24176e-24
Cox7a2	7.38122e-29	-0.382135	0.107	0.467	1.25193e-24
Psmc4	7.81579e-29	-0.799026	0.085	0.374	1.32564e-24
Mcm6	8.11348e-29	-0.863015	0.085	0.376	1.37613e-24
4930470H14Rik	8.85119e-29	0.906362	0.838	0.883	1.50125e-24
Syngr2	9.44831e-29	-0.355848	0.173	0.555	1.60253e-24
Tk1	9.66511e-29	-0.572274	0.022	0.289	1.6393e-24
Ly6c2	1.00554e-28	-1.62023	0.535	0.767	1.7055e-24
Ndufb8	1.01667e-28	-0.279443	0.173	0.552	1.72438e-24
Gabarap	1.11286e-28	0.71367	0.756	0.859	1.88752e-24
Fermt3	1.12375e-28	-0.29938	0.384	0.759	1.906e-24
Incenp	1.15133e-28	-0.463896	0.063	0.35	1.95277e-24
Tcp1	1.17394e-28	-0.629587	0.063	0.351	1.99111e-24
Rpl36	1.23636e-28	-0.451204	0.181	0.558	2.09699e-24
Cdca3	1.47047e-28	-0.426308	0.022	0.289	2.49407e-24
Tnfsf13	1.58902e-28	-0.439226	0.004	0.257	2.69514e-24
Map4k1	1.67931e-28	-0.470914	0.052	0.342	2.84828e-24
Insig1	1.84742e-28	-0.374415	0.033	0.336	3.1334e-24
Pkmyt1	2.15465e-28	-0.429813	0.007	0.266	3.65451e-24
Rpl23a	2.17886e-28	-0.598873	0.155	0.53	3.69556e-24
B430010I23Rik	2.2054e-28	0.918642	0.502	0.346	3.74057e-24
2700094K13Rik	2.3338e-28	-0.695701	0.037	0.311	3.95837e-24
Hmga1-rs1	2.45513e-28	-0.563942	0.066	0.351	4.16415e-24
Pdhb	2.52488e-28	-0.589446	0.059	0.38	4.28245e-24
Hnrnpr	2.77799e-28	-0.408847	0.07	0.387	4.71175e-24
Nucb1	2.90442e-28	-0.482883	0.103	0.454	4.92618e-24
Limd2	2.91595e-28	0.675971	0.801	0.895	4.94574e-24
Pdia6	3.13334e-28	-0.706892	0.096	0.395	5.31446e-24
Vcp	3.1715e-28	-0.314552	0.181	0.559	5.37917e-24
Ear10	3.18643e-28	-1.47152	0.192	0.571	5.4045e-24
Pdcd5	3.51701e-28	-0.554764	0.018	0.302	5.9652e-24
Zyx	3.75853e-28	0.966533	0.852	0.879	6.37485e-24
C5ar2	3.78591e-28	0.739849	0.48	0.315	6.42129e-24
Gng10	3.99188e-28	-0.626308	0.107	0.462	6.77063e-24
Mrpl42	4.04137e-28	-0.761207	0.03	0.317	6.85457e-24
Sdhb	4.04938e-28	-0.620352	0.122	0.479	6.86816e-24
Eef1b2	4.53273e-28	-0.516765	0.181	0.479	7.68797e-24
Mpc1	4.57671e-28	-0.322327	0.07	0.397	7.76256e-24
Atp5l	5.38456e-28	-0.346138	0.137	0.496	9.13276e-24
Rsl24d1	5.65204e-28	-0.329122	0.03	0.325	9.58642e-24
Rps21	5.74562e-28	-0.311273	0.026	0.302	9.74515e-24
Uqcr10	6.03858e-28	-0.669205	0.041	0.35	1.0242e-23
Cetn3	6.04142e-28	-0.38794	0.041	0.35	1.02469e-23
Smc6	6.07682e-28	-0.320519	0.092	0.407	1.03069e-23
Lig1	6.11576e-28	-0.3195	0.033	0.322	1.03729e-23
Racgap1	6.21388e-28	-0.447779	0.03	0.307	1.05394e-23
Ndufs8	6.2745e-28	-0.687066	0.07	0.398	1.06422e-23
Rbbp7	6.39059e-28	-0.527862	0.074	0.389	1.08391e-23
Cct4	6.72306e-28	-0.651276	0.111	0.44	1.1403e-23
Psmb3	6.9038e-28	-0.352938	0.155	0.525	1.17095e-23
Ceacam1	7.07937e-28	-0.399384	0.391	0.758	1.20073e-23
Cct8	7.07989e-28	-0.692918	0.092	0.396	1.20082e-23
Hist1h1c	7.74699e-28	1.21612	0.506	0.597	1.31397e-23
Psmd6	9.28525e-28	-0.64703	0.044	0.339	1.57487e-23
Apoa1bp	9.86083e-28	-0.612528	0.015	0.267	1.67249e-23
Acta2	1.00997e-27	1.20484	0.232	0.077	1.71301e-23
Ubb	1.0612e-27	0.569116	0.989	0.995	1.79991e-23
Rps12	1.11453e-27	-0.54882	0.077	0.409	1.89035e-23
Eif3d	1.1297e-27	-0.629486	0.063	0.354	1.91608e-23
Cd14	1.13434e-27	1.34116	0.487	0.497	1.92395e-23
Gm1821	1.18713e-27	0.677927	1	0.996	2.01348e-23
Cd84	1.20615e-27	0.899752	0.657	0.691	2.04575e-23
Rfwd3	1.24386e-27	-0.283232	0.015	0.287	2.1097e-23
Ptges3	1.24481e-27	-0.274318	0.251	0.635	2.11132e-23
Fam65b	1.29917e-27	1.14104	0.775	0.691	2.20353e-23
Acsl5	1.49848e-27	-0.353749	0.066	0.393	2.54157e-23
Stom	1.53272e-27	-0.388302	0.037	0.328	2.59965e-23
Cox7a2l	1.58576e-27	-0.396624	0.159	0.527	2.68961e-23
Nxf1	1.66711e-27	-0.34873	0.114	0.464	2.82758e-23
Plod3	1.70176e-27	-0.567597	0.085	0.417	2.88635e-23
Smc1a	1.71564e-27	-0.296352	0.077	0.412	2.9099e-23
Bscl2	1.80001e-27	-0.49779	0.048	0.352	3.053e-23
Ndufab1	2.0596e-27	-0.381771	0.011	0.263	3.49328e-23
Nap1l4	2.10154e-27	-0.449259	0.085	0.423	3.56443e-23
Tspan32	2.11944e-27	-0.520654	0.063	0.385	3.59477e-23
Tnfrsf14	2.13515e-27	-0.456554	0.059	0.38	3.62143e-23
Cbx1	2.31926e-27	-0.251208	0.059	0.374	3.9337e-23
Pih1d1	2.38139e-27	-0.456759	0.022	0.3	4.03908e-23
Psma3	2.41215e-27	-0.483441	0.162	0.52	4.09125e-23
Ndufs2	2.64983e-27	-0.579545	0.077	0.407	4.49437e-23
Sft2d1	2.79098e-27	-0.351346	0.059	0.378	4.73378e-23
Vdac3	2.80255e-27	-0.519325	0.103	0.435	4.75341e-23
Psma1	2.88844e-27	-0.34583	0.177	0.548	4.89909e-23
Rrm1	3.11539e-27	-0.386193	0.063	0.329	5.28402e-23
Hmga1	3.44365e-27	-0.304548	0.007	0.258	5.84077e-23
Abcd1	3.68376e-27	-0.410043	0.07	0.396	6.24803e-23
Nme2	3.87574e-27	-0.823017	0.07	0.353	6.57364e-23
Ndufs4	4.05404e-27	-0.352252	0.077	0.409	6.87606e-23
Tmem160	4.0829e-27	-0.404082	0.007	0.257	6.925e-23
Uqcr11	4.12369e-27	-0.713046	0.044	0.348	6.99419e-23
Eif3g	4.71222e-27	-0.615916	0.066	0.384	7.9924e-23
Gorasp2	5.16648e-27	-0.509165	0.081	0.404	8.76287e-23
Hist1h2bc	5.84836e-27	1.02317	0.137	0.181	9.91941e-23
Hsp90aa1	6.30117e-27	-0.336333	0.103	0.428	1.06874e-22
Uhrf1	6.49543e-27	-0.476146	0.052	0.32	1.10169e-22
Sae1	6.66408e-27	-0.611039	0.059	0.348	1.13029e-22
Hypk	6.84553e-27	-0.329923	0.114	0.453	1.16107e-22
Cycs	6.86126e-27	-0.401602	0.399	0.665	1.16374e-22
Txn1	7.04668e-27	0.350156	0.387	0.631	1.19519e-22
Hspa5	7.20145e-27	-0.664317	0.373	0.719	1.22144e-22
Sf3b5	7.47412e-27	-0.566938	0.052	0.362	1.26769e-22
Gm2382	7.83242e-27	0.364863	0.232	0.432	1.32846e-22
Cnbp	8.48222e-27	-0.466229	0.214	0.577	1.43867e-22
Gm5483	8.58339e-27	1.74719	0.221	0.018	1.45583e-22
Snrpa1	8.94299e-27	-0.51924	0.026	0.276	1.51682e-22
Srsf2	9.18652e-27	-0.270322	0.166	0.524	1.55813e-22
Mrps33	9.93293e-27	-0.491657	0.03	0.317	1.68472e-22
Erp29	1.07117e-26	-0.748334	0.181	0.529	1.81681e-22
Uba2	1.07397e-26	-0.577119	0.059	0.339	1.82157e-22
Slbp	1.07604e-26	-0.566207	0.089	0.418	1.82506e-22
Ifitm3	1.07701e-26	-0.449523	0.439	0.797	1.82672e-22
Taf9	1.12038e-26	-0.33002	0.059	0.374	1.90027e-22
2700029M09Rik	1.13569e-26	-0.499432	0.037	0.318	1.92624e-22
Pcna	1.28112e-26	-0.725137	0.052	0.333	2.17291e-22
Hist2h3b	1.44214e-26	-1.03427	0.044	0.317	2.44602e-22
G6pdx	1.60885e-26	-0.483315	0.244	0.605	2.72877e-22
Arhgef6	1.61718e-26	-0.296604	0.103	0.445	2.7429e-22
Clec12a	1.64115e-26	-0.371953	0.196	0.565	2.78355e-22
Pcyox1	1.72161e-26	-0.335738	0.044	0.335	2.92003e-22
Psmc1	1.72221e-26	-0.514879	0.066	0.385	2.92104e-22
Akap13	1.76521e-26	0.387342	0.616	0.747	2.99397e-22
Pdlim7	1.86134e-26	1.08787	0.476	0.291	3.15703e-22
Igfbp4	1.95347e-26	-0.700029	0.041	0.312	3.31328e-22
Psma5	1.974e-26	-0.596477	0.037	0.329	3.3481e-22
Srsf10	2.02956e-26	-0.283489	0.081	0.407	3.44234e-22
Gm12669	2.15614e-26	-0.430773	0.033	0.309	3.65703e-22
Gm6793	2.24286e-26	-0.462924	0.373	0.733	3.80412e-22
Parp2	2.25957e-26	-0.41959	0.015	0.276	3.83245e-22
Entpd1	2.29505e-26	1.19226	0.502	0.314	3.89264e-22
Cacybp	2.35873e-26	-0.426594	0.041	0.32	4.00065e-22
Rbm38	2.42308e-26	0.477935	0.28	0.477	4.10979e-22
Gm10872	2.46518e-26	1.40783	0.229	0.028	4.18119e-22
F13a1	2.48281e-26	-1.65452	0.192	0.421	4.21109e-22
Ncaph2	2.54314e-26	-0.45557	0.07	0.367	4.31342e-22
Mfsd10	2.66052e-26	-0.63729	0.055	0.339	4.51251e-22
Hist2h3c2	2.66797e-26	-0.639811	0.037	0.305	4.52515e-22
Mndal	2.80824e-26	-0.700432	0.096	0.381	4.76306e-22
Zcrb1	2.84575e-26	-0.418234	0.063	0.374	4.82668e-22
Cenpa	3.12714e-26	-0.772413	0.074	0.341	5.30395e-22
Commd4	3.12718e-26	-0.795481	0.026	0.305	5.30402e-22
Bcap31	3.13955e-26	-0.557988	0.111	0.445	5.32499e-22
Mrpl23	3.1467e-26	-0.68004	0.018	0.276	5.33712e-22
Ap3s1	3.19575e-26	-0.583195	0.125	0.464	5.42031e-22
Slc39a11	3.4e-26	-0.296498	0.03	0.312	5.76673e-22
Ms4a6b	3.72614e-26	-0.923752	0.066	0.343	6.3199e-22
Fcgr3	3.85354e-26	0.88312	0.649	0.734	6.53598e-22
Ms4a6d	3.96356e-26	-0.966826	0.066	0.358	6.72259e-22
Eif2s1	4.02588e-26	-0.368719	0.092	0.362	6.82829e-22
Cnot7	4.10221e-26	-0.30945	0.037	0.325	6.95776e-22
Luc7l	4.1158e-26	-0.25574	0.092	0.424	6.9808e-22
Ifi30	4.5316e-26	-0.789024	0.015	0.267	7.68604e-22
Snx12	4.61688e-26	-0.342779	0.052	0.356	7.83069e-22
Map1lc3b	4.6967e-26	0.953967	0.764	0.733	7.96608e-22
Ptbp1	5.42318e-26	-0.536154	0.07	0.361	9.19825e-22
Pycard	5.43974e-26	-0.488916	0.1	0.423	9.22634e-22
Tram1	5.72992e-26	-0.275867	0.137	0.486	9.71852e-22
Ndufs6	5.80501e-26	-0.590696	0.066	0.381	9.84588e-22
Cdc20	6.22532e-26	-0.887949	0.052	0.298	1.05588e-21
Rap1a	6.50137e-26	-0.555854	0.14	0.485	1.1027e-21
Psmb5	6.59698e-26	-0.261366	0.052	0.339	1.11891e-21
Babam1	6.78321e-26	-0.389534	0.022	0.284	1.1505e-21
Iqgap1	7.1147e-26	0.614592	0.875	0.939	1.20672e-21
Laptm4a	7.38957e-26	-0.354177	0.17	0.529	1.25334e-21
Ndufv1	7.83763e-26	-0.599035	0.063	0.358	1.32934e-21
Coa3	8.48286e-26	-0.375648	0.044	0.34	1.43878e-21
Ube2f	8.90362e-26	-0.639346	0.03	0.295	1.51014e-21
Hn1	9.36198e-26	-0.600319	0.173	0.52	1.58789e-21
Psmd8	9.44526e-26	-0.499566	0.103	0.436	1.60201e-21
Prdx1	9.51148e-26	-0.941243	0.236	0.521	1.61324e-21
Rad23a	1.01271e-25	-0.35775	0.011	0.262	1.71766e-21
Rab5b	1.02637e-25	0.288988	0.24	0.462	1.74082e-21
Snx1	1.073e-25	-0.601533	0.1	0.414	1.81992e-21
Dbnl	1.08254e-25	-0.252772	0.306	0.676	1.8361e-21
Psmb4	1.08634e-25	-0.583568	0.03	0.307	1.84254e-21
Nagpa	1.18155e-25	-0.665108	0.037	0.28	2.00402e-21
U2af1	1.22098e-25	-0.527842	0.107	0.437	2.0709e-21
Lsp1	1.2437e-25	0.909844	0.919	0.876	2.10944e-21
Gmfg	1.28663e-25	0.388104	0.517	0.743	2.18226e-21
Cmpk1	1.30162e-25	-0.568106	0.155	0.499	2.20767e-21
Clta	1.31571e-25	-0.364126	0.236	0.604	2.23157e-21
Surf4	1.31772e-25	-0.281696	0.225	0.592	2.23498e-21
Naga	1.39581e-25	-0.730855	0.044	0.33	2.36743e-21
Dck	1.47389e-25	1.0839	0.439	0.396	2.49986e-21
Eif1ax	1.52647e-25	-0.52715	0.022	0.287	2.58904e-21
Mgst1	1.60064e-25	0.763917	0.672	0.754	2.71485e-21
Psmd12	1.60749e-25	-0.471781	0.033	0.309	2.72647e-21
Snx2	1.84092e-25	-0.514937	0.07	0.376	3.12239e-21
Tmem179b	1.90241e-25	-0.46647	0.092	0.419	3.22668e-21
Smg9	2.04694e-25	-0.256625	0.015	0.269	3.47181e-21
Arl1	2.0535e-25	-0.53511	0.026	0.295	3.48294e-21
Vps28	2.17225e-25	0.319665	0.255	0.538	3.68436e-21
Hsd17b10	2.20825e-25	-0.572233	0.037	0.322	3.74541e-21
Ost4	2.2573e-25	-0.262172	0.129	0.454	3.82861e-21
Naa38	2.27381e-25	-0.465532	0.048	0.343	3.8566e-21
Arl6ip1	2.44463e-25	-0.364963	0.325	0.691	4.14633e-21
Nfu1	2.72185e-25	-0.520403	0.033	0.313	4.61652e-21
Thoc7	2.80153e-25	-0.501593	0.022	0.284	4.75167e-21
Ehd4	2.85328e-25	-0.44538	0.07	0.378	4.83945e-21
Anxa7	2.90439e-25	-0.395706	0.026	0.289	4.92614e-21
Gltscr2	3.09869e-25	-0.270572	0.173	0.529	5.25569e-21
Nutf2-ps1	3.18652e-25	-0.51699	0.022	0.286	5.40465e-21
Rbm17	3.96141e-25	-0.251549	0.1	0.417	6.71895e-21
Lamtor5	4.63417e-25	-0.457601	0.066	0.374	7.86001e-21
Gpsm3	4.84692e-25	0.435621	0.635	0.699	8.22086e-21
Ppil1	4.99755e-25	-0.55782	0.018	0.269	8.47635e-21
D1Ertd622e	5.01828e-25	0.979127	0.443	0.407	8.5115e-21
Uqcrh	5.27341e-25	-0.310553	0.074	0.384	8.94423e-21
AI413582	5.54356e-25	-0.384561	0.033	0.298	9.40243e-21
Slc43a3	5.66449e-25	-0.370575	0.022	0.269	9.60754e-21
B4galnt1	5.69046e-25	-0.491905	0.255	0.615	9.65159e-21
Cuedc2	5.96317e-25	-0.333534	0.085	0.403	1.01141e-20
Sf3b3	6.07169e-25	-0.390452	0.033	0.291	1.02982e-20
Nsmce1	6.18736e-25	-0.554264	0.03	0.287	1.04944e-20
Litaf	6.71608e-25	0.828869	0.461	0.554	1.13912e-20
Eif3a	6.98941e-25	-0.293559	0.1	0.417	1.18547e-20
Slirp	7.83461e-25	-0.386702	0.007	0.219	1.32883e-20
Stub1	7.89216e-25	-0.335309	0.096	0.419	1.33859e-20
Mt1	7.96144e-25	-0.857413	0.048	0.326	1.35034e-20
Tcea1	8.38019e-25	-0.360691	0.266	0.593	1.42136e-20
Chtop	8.48098e-25	-0.282683	0.089	0.406	1.43846e-20
Emc10	8.59486e-25	-0.440055	0.022	0.281	1.45777e-20
Nudt4	8.8546e-25	1.10517	0.454	0.336	1.50183e-20
Dnajc7	8.8711e-25	-0.398561	0.063	0.364	1.50463e-20
Raver1	8.87814e-25	-0.251187	0.03	0.301	1.50582e-20
Rgcc	9.82231e-25	-1.0343	0.044	0.301	1.66596e-20
Atp1a3	1.17046e-24	0.974538	0.76	0.676	1.98521e-20
Adss	1.39146e-24	-0.44241	0.089	0.398	2.36005e-20
Trim30b	1.40896e-24	0.80999	0.303	0.091	2.38974e-20
Psma6	1.45183e-24	-0.534692	0.092	0.396	2.46245e-20
Srsf4	1.5493e-24	-0.250357	0.037	0.307	2.62777e-20
Galns	1.73597e-24	-0.409178	0.033	0.295	2.94437e-20
Sec13	1.73599e-24	-0.414933	0.081	0.389	2.94442e-20
Anapc13	2.01747e-24	-0.492004	0.015	0.259	3.42184e-20
Ddrgk1	2.12134e-24	-0.538311	0.015	0.246	3.59801e-20
Rnps1	2.26203e-24	-0.645158	0.063	0.328	3.83663e-20
Ccna2	2.2803e-24	-0.608363	0.077	0.33	3.86762e-20
Polr2g	2.40195e-24	-0.598083	0.048	0.326	4.07395e-20
Copa	2.41834e-24	-0.32202	0.122	0.453	4.10174e-20
Cct2	2.45217e-24	-0.548895	0.055	0.339	4.15912e-20
Rab6a	2.51107e-24	0.617115	0.432	0.557	4.25903e-20
Sh2d3c	2.86408e-24	0.959365	0.657	0.49	4.85776e-20
Hnrnpc	2.88907e-24	0.558831	0.387	0.627	4.90015e-20
Ndufs7	2.95215e-24	-0.432822	0.077	0.386	5.00715e-20
Gm9846	3.02237e-24	-0.385198	0.232	0.587	5.12624e-20
Cln6	3.19575e-24	-0.431136	0.018	0.253	5.42031e-20
Cox20	3.36657e-24	-0.460891	0.03	0.296	5.71004e-20
Fam105a	3.45395e-24	-0.580848	0.085	0.358	5.85825e-20
Psma2	3.4901e-24	-0.519034	0.133	0.467	5.91957e-20
Hnrnpa1	3.52139e-24	-0.637844	0.011	0.248	5.97263e-20
Ssbp1	3.57738e-24	-0.338178	0.044	0.322	6.0676e-20
Tm9sf1	3.70947e-24	-0.452741	0.052	0.287	6.29163e-20
Atp1a1	3.80302e-24	-0.404391	0.044	0.32	6.4503e-20
Pdia4	3.99052e-24	-0.664919	0.052	0.306	6.76832e-20
Polr2j	4.04756e-24	-0.392949	0.066	0.351	6.86507e-20
Idh3b	4.24494e-24	-0.686112	0.063	0.346	7.19985e-20
Gda	4.30567e-24	0.791073	0.649	0.585	7.30284e-20
H2-DMb1	4.31401e-24	-0.679306	0.03	0.287	7.31699e-20
Sepw1	4.48114e-24	-0.535292	0.063	0.358	7.60046e-20
Il1rn	4.6963e-24	1.25573	0.428	0.175	7.96539e-20
Acp5	5.1253e-24	-0.931362	0.018	0.263	8.69303e-20
Rpl12	5.13e-24	-0.708206	0.066	0.342	8.70099e-20
Lilra6	5.21329e-24	0.891075	0.808	0.743	8.84226e-20
1810022K09Rik	5.68618e-24	-0.441949	0.011	0.248	9.64433e-20
Mrps18c	5.93148e-24	-0.431696	0.033	0.292	1.00604e-19
Polr2m	6.26807e-24	-0.578355	0.07	0.317	1.06313e-19
Ilf2	6.91593e-24	-0.349008	0.055	0.334	1.17301e-19
Anxa2	6.99872e-24	0.993909	0.771	0.749	1.18705e-19
Glo1	7.38316e-24	-0.31439	0.015	0.253	1.25226e-19
Pgp	7.49843e-24	-0.57662	0.03	0.294	1.27181e-19
2810474O19Rik	7.70182e-24	0.588846	0.469	0.505	1.30631e-19
Smarcb1	7.76612e-24	-0.485067	0.041	0.305	1.31721e-19
Cers6	7.88542e-24	0.539521	0.424	0.503	1.33745e-19
Spc25	7.91862e-24	-0.538415	0.015	0.239	1.34308e-19
Eif4a3	7.9707e-24	-0.527155	0.092	0.397	1.35191e-19
Bub3	8.01434e-24	-0.398384	0.114	0.436	1.35931e-19
Ist1	8.02039e-24	0.278937	0.21	0.464	1.36034e-19
Med8	8.12498e-24	-0.32135	0.081	0.382	1.37808e-19
Psmd2	8.16146e-24	-0.53235	0.107	0.4	1.38427e-19
Actn4	8.17632e-24	-0.264016	0.125	0.454	1.38678e-19
Trap1	8.44079e-24	-0.418563	0.022	0.261	1.43164e-19
Sdha	8.63744e-24	-0.442118	0.129	0.441	1.465e-19
Zc3h15	8.80284e-24	-0.379989	0.059	0.351	1.49305e-19
Psmd1	8.84122e-24	-0.40917	0.044	0.291	1.49956e-19
Ssu72	8.94637e-24	0.462847	0.369	0.587	1.51739e-19
Xpnpep1	9.22046e-24	-0.539528	0.048	0.272	1.56388e-19
Dynlt1b	9.3114e-24	0.527255	0.295	0.446	1.57931e-19
Actb	9.37671e-24	0.366848	1	1	1.59038e-19
Eif6	1.00299e-23	-0.491296	0.085	0.381	1.70118e-19
Hnrnpm	1.03269e-23	-0.345929	0.133	0.46	1.75155e-19
Acat1	1.04696e-23	-0.29196	0.059	0.336	1.77575e-19
Rnf167	1.06423e-23	0.798066	0.476	0.562	1.80505e-19
Rfc5	1.07427e-23	-0.473787	0.022	0.245	1.82207e-19
Birc5	1.20151e-23	-0.905755	0.605	0.738	2.03788e-19
Inhba	1.25708e-23	-0.710683	0.015	0.238	2.13213e-19
Ncam1	1.34978e-23	-0.2618	0.203	0.533	2.28936e-19
H2-DMa	1.36398e-23	-0.74249	0.041	0.263	2.31345e-19
Ndufb5	1.5348e-23	-0.396848	0.055	0.335	2.60318e-19
Idh3g	1.6874e-23	-0.387645	0.092	0.403	2.862e-19
Ube2l6	1.69495e-23	-0.518686	0.188	0.532	2.8748e-19
Stk16	1.69591e-23	-0.35811	0.085	0.384	2.87643e-19
Slc1a5	1.98952e-23	-0.340013	0.026	0.276	3.37443e-19
Cct6a	2.10586e-23	-0.558201	0.055	0.306	3.57176e-19
Ptgr1	2.16509e-23	-0.335118	0.015	0.238	3.6722e-19
Tuba4a	2.21484e-23	-0.585394	0.14	0.447	3.7566e-19
Psmd7	2.23328e-23	-0.459974	0.052	0.331	3.78787e-19
Itpripl1	2.26795e-23	-0.392855	0.144	0.438	3.84666e-19
Chsy1	2.2993e-23	0.579045	0.369	0.364	3.89984e-19
H2-DMb2	2.31516e-23	-0.483825	0.022	0.27	3.92674e-19
Psmb9	2.33043e-23	-0.26725	0.081	0.353	3.95264e-19
Hprt	2.36164e-23	-0.352134	0.052	0.334	4.00558e-19
Gm15987	2.58767e-23	-0.272446	0.004	0.218	4.38895e-19
Tbca	2.82108e-23	-0.534112	0.041	0.307	4.78483e-19
1110004F10Rik	2.86534e-23	-0.472535	0.074	0.368	4.8599e-19
Nap1l1	2.96614e-23	-0.541033	0.79	0.917	5.03087e-19
Gmnn	3.13962e-23	-0.509388	0.022	0.246	5.32511e-19
Ddx1	3.14505e-23	-0.400416	0.018	0.25	5.33432e-19
Fen1	3.27169e-23	-0.543701	0.037	0.267	5.54912e-19
Emc2	3.44664e-23	-0.414374	0.074	0.37	5.84585e-19
Rhog	3.48233e-23	0.59383	0.565	0.787	5.90639e-19
Bckdk	3.59228e-23	-0.54537	0.38	0.627	6.09287e-19
Fxr1	3.61128e-23	-0.255103	0.052	0.329	6.1251e-19
Kif22	3.68707e-23	-0.610131	0.044	0.266	6.25365e-19
Dera	3.94931e-23	-0.432195	0.007	0.228	6.69843e-19
Api5	4.19498e-23	-0.427598	0.125	0.437	7.11511e-19
Hebp1	4.59614e-23	-0.561748	0.026	0.278	7.79552e-19
Ctnna1	4.60753e-23	-0.256073	0.052	0.331	7.81483e-19
Ear11	4.65298e-23	-0.351767	0.092	0.393	7.89192e-19
Dok3	4.79494e-23	0.357613	0.528	0.75	8.1327e-19
0610010K14Rik	5.20872e-23	-0.4275	0.037	0.302	8.83451e-19
Chchd3	5.2816e-23	-0.429779	0.018	0.255	8.95812e-19
Snrnp40	5.73005e-23	-0.439007	0.037	0.281	9.71874e-19
Srp19	5.89874e-23	-0.282979	0.037	0.297	1.00049e-18
Ccnl2	5.98822e-23	0.538139	0.266	0.41	1.01566e-18
Serpinb10	6.02167e-23	-0.337313	0.074	0.369	1.02134e-18
Knstrn	6.05003e-23	-0.320605	0.037	0.27	1.02615e-18
Gapdh	6.0961e-23	-0.260467	0.808	0.967	1.03396e-18
Twf2	6.12787e-23	0.394267	0.373	0.611	1.03935e-18
Cs	6.15903e-23	-0.305493	0.185	0.519	1.04463e-18
Rab31	6.8404e-23	0.421389	0.605	0.826	1.1602e-18
Mrpl54	6.95776e-23	-0.569078	0.026	0.256	1.18011e-18
Trappc3	7.03215e-23	-0.338388	0.011	0.23	1.19272e-18
Ahnak	7.23703e-23	-0.261801	0.085	0.348	1.22747e-18
Esd	7.25606e-23	-0.287503	0.107	0.419	1.2307e-18
Psmc2	7.30406e-23	-0.443224	0.059	0.335	1.23884e-18
Alas1	7.31597e-23	-0.434559	0.111	0.425	1.24086e-18
Immt	7.38044e-23	-0.496606	0.055	0.286	1.2518e-18
Samhd1	7.545e-23	1.02412	0.649	0.542	1.27971e-18
Cwc15	8.30443e-23	-0.384098	0.089	0.387	1.40852e-18
H2-D1	8.32549e-23	0.773241	0.963	0.962	1.41209e-18
Rab32	8.81419e-23	0.399656	0.376	0.62	1.49498e-18
Ckap2l	9.11397e-23	-0.345468	0.037	0.269	1.54582e-18
Capn1	9.22002e-23	0.63658	0.432	0.524	1.56381e-18
Arhgef10l	9.3551e-23	-0.531476	0.033	0.267	1.58672e-18
Cdkn3	9.38369e-23	-0.479904	0.011	0.228	1.59157e-18
Rexo2	9.78193e-23	-0.607915	0.055	0.325	1.65911e-18
Rnd3	9.88056e-23	-0.402238	0.022	0.256	1.67584e-18
Mospd3	9.90347e-23	-0.367751	0.055	0.334	1.67973e-18
Gtf2h5	1.02999e-22	-0.26366	0.022	0.262	1.74696e-18
Mcm3	1.06453e-22	-0.556944	0.063	0.295	1.80555e-18
Parp1	1.08646e-22	-0.306509	0.022	0.252	1.84275e-18
B430306N03Rik	1.10467e-22	0.732648	0.708	0.609	1.87363e-18
Fcf1	1.10608e-22	-0.611358	0.033	0.283	1.87603e-18
Nucb2	1.1414e-22	-0.362102	0.052	0.328	1.93593e-18
Idh2	1.20649e-22	-0.663426	0.044	0.269	2.04632e-18
Sumo3	1.48604e-22	-0.371246	0.052	0.324	2.52047e-18
Mcm4	1.48728e-22	-0.378461	0.063	0.339	2.52258e-18
Uqcrc2	1.50416e-22	-0.500965	0.066	0.335	2.55121e-18
Tipin	1.65846e-22	-0.64397	0.041	0.262	2.81292e-18
Sp110	1.7494e-22	-0.279593	0.325	0.666	2.96716e-18
Atg3	2.00814e-22	0.998749	0.539	0.498	3.40601e-18
Lair1	2.15472e-22	-0.485131	0.041	0.275	3.65462e-18
Tcf19	2.22667e-22	-0.577717	0.018	0.242	3.77665e-18
Pira11	2.23773e-22	0.692813	0.712	0.687	3.79541e-18
Ilk	2.24848e-22	-0.280971	0.295	0.641	3.81365e-18
Mad2l1	2.25822e-22	-0.415012	0.044	0.286	3.83017e-18
Psmc6	2.3248e-22	-0.418726	0.089	0.386	3.9431e-18
Snrpa	2.33113e-22	-0.41134	0.033	0.284	3.95383e-18
Eif4ebp1	2.38403e-22	0.358959	0.229	0.452	4.04355e-18
Hbp1	2.39148e-22	0.740018	0.288	0.389	4.05619e-18
Txnl1	2.55423e-22	-0.290412	0.055	0.324	4.33223e-18
Mrpl20	2.58498e-22	-0.37521	0.055	0.325	4.38439e-18
Dnajc3	2.61143e-22	-0.269967	0.092	0.384	4.42925e-18
Ube2g2	2.63783e-22	-0.292926	0.089	0.387	4.47402e-18
Rasgrp2	2.70704e-22	0.319129	0.269	0.49	4.5914e-18
D17Wsu104e	2.71605e-22	-0.625728	0.018	0.245	4.60669e-18
Lbp	2.83371e-22	-0.37292	0.026	0.248	4.80625e-18
Suclg1	2.8905e-22	-0.508667	0.03	0.272	4.90258e-18
Mgst2	3.03881e-22	-0.289297	0.081	0.356	5.15413e-18
Pa2g4	3.05442e-22	-0.416421	0.041	0.294	5.1806e-18
Ly75	3.11901e-22	-0.268318	0.055	0.328	5.29015e-18
Hmha1	3.22811e-22	0.889237	0.79	0.845	5.4752e-18
Cetn2	3.40603e-22	-0.366235	0.004	0.207	5.77696e-18
Gtf3c6	3.72623e-22	-0.353178	0.007	0.213	6.32006e-18
Parl	3.77314e-22	-0.539735	0.033	0.269	6.39962e-18
Ndufb2	3.78196e-22	-0.410591	0.011	0.229	6.41458e-18
3110001D03Rik	3.88002e-22	-0.391768	0.004	0.206	6.58091e-18
Mrpl28	4.01287e-22	-0.582089	0.048	0.307	6.80624e-18
Cdk1	4.07446e-22	-0.368666	0.052	0.285	6.91068e-18
Polr1d	4.26067e-22	-0.434589	0.077	0.368	7.22652e-18
Lsm12	4.33953e-22	-0.271909	0.03	0.278	7.36027e-18
Dhx15	4.74125e-22	-0.307949	0.077	0.364	8.04163e-18
Lrpap1	4.95821e-22	-0.384529	0.063	0.324	8.40962e-18
Txnl4b	5.00745e-22	0.901315	0.362	0.395	8.49314e-18
Il16	5.24391e-22	0.731472	0.565	0.654	8.8942e-18
Tecr	5.35352e-22	-0.262583	0.568	0.86	9.0801e-18
Ccr2	5.70532e-22	-0.797509	0.232	0.46	9.67679e-18
Mif	5.75258e-22	-0.752688	0.03	0.276	9.75696e-18
Whsc1l1	5.84197e-22	0.465087	0.528	0.695	9.90856e-18
Slc35b2	5.8677e-22	-0.470609	0.041	0.281	9.95221e-18
Ahcy	5.99584e-22	-0.480905	0.059	0.262	1.01695e-17
Sorl1	6.10684e-22	0.533067	0.76	0.551	1.03578e-17
Sys1	6.28228e-22	0.275086	0.129	0.331	1.06554e-17
Mtch2	6.48953e-22	-0.371721	0.07	0.351	1.10069e-17
Bcat2	6.57466e-22	-0.443534	0.037	0.291	1.11513e-17
Lsm4	6.69319e-22	-0.479542	0.059	0.322	1.13523e-17
Hn1l	6.82135e-22	-0.40049	0.041	0.273	1.15697e-17
Isca2	6.85618e-22	-0.441743	0.033	0.285	1.16288e-17
D10Wsu52e	7.29802e-22	-0.501869	0.018	0.245	1.23782e-17
Dda1	7.3219e-22	-0.312221	0.048	0.309	1.24187e-17
Notch2	7.89229e-22	0.34965	0.852	0.905	1.33861e-17
Capza1	8.05061e-22	0.404725	0.657	0.879	1.36546e-17
Ndufa5	8.35431e-22	-0.435084	0.03	0.272	1.41698e-17
Aurkb	8.63199e-22	-0.555381	0.052	0.272	1.46407e-17
Trex1	9.19501e-22	-0.846082	0.111	0.391	1.55957e-17
Dnajb1	9.22939e-22	0.398441	0.192	0.351	1.5654e-17
Itgb1	9.28965e-22	-0.423088	0.07	0.35	1.57562e-17
Eif1	1.00652e-21	0.527936	0.963	0.99	1.70716e-17
Ndufa9	1.03645e-21	-0.494196	0.037	0.241	1.75792e-17
Cdca4	1.08757e-21	-0.33692	0.052	0.315	1.84463e-17
Gpr137b-ps	1.16702e-21	1.03816	0.469	0.272	1.97939e-17
Tnfrsf1a	1.18728e-21	0.855541	0.472	0.56	2.01375e-17
Mppe1	1.19462e-21	-0.430856	0.1	0.398	2.0262e-17
Cat	1.19548e-21	-0.52822	0.092	0.374	2.02766e-17
Rnaseh2b	1.20587e-21	-0.294337	0.022	0.229	2.04527e-17
S100a1	1.21914e-21	-0.607377	0.022	0.255	2.06778e-17
Fam132a	1.25417e-21	-0.631571	0.011	0.228	2.1272e-17
Vimp	1.2725e-21	-0.39034	0.055	0.323	2.15829e-17
Ict1	1.28835e-21	-0.457586	0.026	0.248	2.18518e-17
Mob3a	1.32412e-21	0.574308	0.365	0.554	2.24584e-17
Nfatc1	1.42185e-21	0.453012	0.491	0.597	2.4116e-17
Mea1	1.42498e-21	-0.40894	0.048	0.307	2.4169e-17
Mrpl30	1.42602e-21	-0.517023	0.041	0.295	2.41867e-17
Ahsa1	1.45435e-21	-0.346826	0.096	0.392	2.46672e-17
BC017643	1.56746e-21	-0.320908	0.085	0.373	2.65857e-17
1810033B17Rik	1.58299e-21	0.713909	0.561	0.627	2.6849e-17
Ncln	1.64714e-21	-0.426364	0.103	0.395	2.79372e-17
Trp53	1.68981e-21	-0.372694	0.022	0.257	2.86609e-17
Ccdc59	1.75136e-21	-0.264295	0.004	0.202	2.97049e-17
Irf2	1.78019e-21	0.3319	0.421	0.56	3.01938e-17
Cse1l	1.93395e-21	-0.306418	0.037	0.263	3.28018e-17
Trib1	2.0934e-21	0.684603	0.446	0.378	3.55062e-17
Emg1	2.1071e-21	-0.432241	0.044	0.303	3.57386e-17
H2-Ke2	2.35211e-21	-0.408721	0.022	0.256	3.98942e-17
Cnppd1	2.43058e-21	0.334911	0.284	0.475	4.12251e-17
Usmg5	2.49664e-21	-0.298775	0.03	0.259	4.23455e-17
Rasgrp4	2.55676e-21	0.544959	0.421	0.38	4.33652e-17
Dok2	2.55994e-21	-0.786216	0.03	0.261	4.34191e-17
Nipsnap3b	2.56122e-21	-0.263951	0.052	0.303	4.34409e-17
Pfdn1	2.76257e-21	-0.356242	0.022	0.248	4.6856e-17
0610031J06Rik	2.76591e-21	-0.491157	0.125	0.425	4.69127e-17
Edf1	2.82488e-21	-0.296511	0.151	0.463	4.79127e-17
Fh1	2.95942e-21	-0.550337	0.048	0.252	5.01947e-17
Exosc8	2.96498e-21	-0.382758	0.037	0.269	5.02891e-17
Emilin1	3.04111e-21	-0.41259	0.037	0.247	5.15803e-17
Dnajc19	3.10336e-21	-0.440166	0.03	0.272	5.26361e-17
Arg2	3.10623e-21	1.38062	0.258	0.057	5.26848e-17
Sdhc	3.24556e-21	-0.295186	0.011	0.222	5.5048e-17
Mapkapk3	3.27797e-21	-0.341388	0.133	0.442	5.55977e-17
Osm	3.28456e-21	1.51125	0.443	0.274	5.57095e-17
Acaa2	3.29169e-21	-0.348596	0.052	0.315	5.58303e-17
Max	3.35296e-21	0.660473	0.465	0.547	5.68695e-17
Mboat7	3.49764e-21	0.592399	0.41	0.552	5.93235e-17
Atp1b3	3.71494e-21	-0.36469	0.151	0.465	6.30091e-17
Plxnb2	3.8161e-21	-0.464983	0.055	0.289	6.47248e-17
Nars	4.00379e-21	-0.348781	0.081	0.365	6.79082e-17
Fkbp3	4.04036e-21	-0.42344	0.026	0.25	6.85286e-17
Mat2a	4.54967e-21	-0.454572	0.066	0.328	7.7167e-17
Txlna	4.68317e-21	-0.270916	0.055	0.308	7.94313e-17
Ube2b	4.80119e-21	0.658814	0.417	0.501	8.14329e-17
Scamp3	4.896e-21	-0.393906	0.033	0.272	8.3041e-17
2410006H16Rik	4.92682e-21	-0.316123	0.103	0.385	8.35637e-17
Itsn2	5.00318e-21	0.289111	0.185	0.398	8.4859e-17
Bola2	5.00804e-21	-0.380373	0.011	0.22	8.49414e-17
Asnsd1	5.09527e-21	-0.255471	0.066	0.34	8.64209e-17
Git2	5.28828e-21	0.271083	0.417	0.677	8.96946e-17
Tmem208	5.40269e-21	-0.378953	0.037	0.278	9.16351e-17
Zcchc17	5.62107e-21	-0.402293	0.03	0.266	9.5339e-17
Fas	5.81938e-21	1.32793	0.306	0.139	9.87025e-17
Plk1	5.98507e-21	-0.585892	0.063	0.272	1.01513e-16
Capg	6.5461e-21	-0.848871	0.063	0.256	1.11028e-16
Rnf5	6.88007e-21	-0.345205	0.066	0.333	1.16693e-16
Cd44	7.25698e-21	0.764922	0.708	0.741	1.23086e-16
Ola1	7.35315e-21	-0.356237	0.03	0.236	1.24717e-16
Cpsf3l	7.53664e-21	-0.27637	0.096	0.385	1.27829e-16
Dhrs7	7.71102e-21	0.932971	0.498	0.537	1.30787e-16
Itm2c	7.85044e-21	-0.3718	0.074	0.351	1.33151e-16
Psen1	8.22011e-21	-0.322443	0.162	0.476	1.39421e-16
Nupr1	8.29096e-21	-0.777833	0.007	0.202	1.40623e-16
Mgat2	1.01887e-20	-0.351313	0.033	0.263	1.72811e-16
Cd63	1.02667e-20	-0.888134	0.192	0.508	1.74133e-16
H1f0	1.07751e-20	-0.531183	0.044	0.274	1.82756e-16
Dusp3	1.08043e-20	-0.409295	0.137	0.397	1.83252e-16
Arl6ip4	1.13596e-20	-0.420919	0.026	0.256	1.9267e-16
Sema4a	1.23768e-20	0.643598	0.384	0.577	2.09922e-16
Elane	1.31115e-20	-3.56719	0.118	0.376	2.22385e-16
Mcm5	1.41702e-20	-0.565688	0.229	0.418	2.40341e-16
Dpy30	1.48528e-20	-0.289284	0.022	0.241	2.51919e-16
Ppp5c	1.50095e-20	-0.3586	0.018	0.223	2.54577e-16
Npm3	1.51071e-20	-0.428889	0.026	0.251	2.56232e-16
Vars	1.54206e-20	-0.293449	0.018	0.236	2.6155e-16
Golga7	1.54654e-20	-0.354841	0.111	0.404	2.62309e-16
Atp6v1g1	1.67066e-20	0.509214	0.52	0.71	2.8336e-16
Emc6	1.78791e-20	-0.300792	0.033	0.269	3.03247e-16
Arpc5l	1.80772e-20	-0.453979	0.048	0.302	3.06608e-16
Kri1	1.83681e-20	-0.271963	0.074	0.347	3.11541e-16
Gdi1	2.24218e-20	0.565677	0.413	0.502	3.80297e-16
Mta2	2.2829e-20	-0.315109	0.162	0.473	3.87203e-16
Slc25a4	2.33572e-20	-0.664691	0.052	0.261	3.96162e-16
2019-03-02	2.37304e-20	-0.281748	0.007	0.206	4.02492e-16
Clec2i	2.37468e-20	-0.594108	0.007	0.201	4.0277e-16
Selenbp1	2.39035e-20	-0.456431	0.011	0.206	4.05427e-16
Mrpl4	2.59082e-20	-0.522075	0.041	0.284	4.39429e-16
Get4	2.62801e-20	-0.347391	0.085	0.347	4.45736e-16
Trmt2a	2.6888e-20	-0.273779	0.026	0.255	4.56048e-16
Bcl6	2.82627e-20	0.542266	0.502	0.51	4.79363e-16
Tmem51	2.83061e-20	-0.778233	0.004	0.19	4.801e-16
0610037L13Rik	2.87799e-20	-0.295447	0.011	0.211	4.88137e-16
Capn2	2.9855e-20	-0.50013	0.052	0.284	5.06371e-16
Clec7a	3.07718e-20	1.35505	0.417	0.213	5.21921e-16
Sec11a	3.10209e-20	-0.358119	0.103	0.386	5.26146e-16
Copg1	3.13362e-20	-0.337571	0.059	0.313	5.31494e-16
Nup88	3.39499e-20	-0.378048	0.018	0.233	5.75825e-16
1110007C09Rik	3.58283e-20	0.786983	0.48	0.56	6.07683e-16
Ep300	3.62085e-20	0.281423	0.343	0.533	6.14133e-16
Ms4a3	3.64318e-20	-1.18465	0.037	0.255	6.1792e-16
Cmtm3	3.73459e-20	-0.437273	0.026	0.229	6.33423e-16
Lyrm4	3.81115e-20	-0.255248	0.026	0.253	6.46409e-16
Hp	4.29506e-20	0.737702	0.948	0.887	7.28485e-16
Nubp2	4.31603e-20	-0.567309	0.044	0.278	7.32043e-16
Mrpl24	4.33121e-20	-0.420025	0.022	0.245	7.34616e-16
Psmb10	4.49401e-20	-0.531831	0.066	0.315	7.62229e-16
Pi16	4.53975e-20	0.933326	0.561	0.525	7.69987e-16
Echs1	4.59325e-20	-0.4679	0.052	0.295	7.79062e-16
Lsm2	4.60583e-20	-0.365731	0.041	0.274	7.81195e-16
Akirin1	4.95273e-20	0.277364	0.177	0.384	8.40032e-16
Wbp2	4.95821e-20	0.291698	0.314	0.558	8.40962e-16
Nkg7	5.15858e-20	-1.33892	0.026	0.228	8.74946e-16
Mrps34	5.22934e-20	-0.429233	0.004	0.188	8.86949e-16
0610007P14Rik	5.34475e-20	-0.321926	0.007	0.203	9.06523e-16
Htra2	5.45597e-20	-0.312978	0.089	0.367	9.25386e-16
Nasp	5.60595e-20	-0.253064	0.022	0.229	9.50825e-16
Atp6v0e	5.87325e-20	0.3065	0.325	0.596	9.96161e-16
Syf2	6.0682e-20	0.636634	0.232	0.364	1.02923e-15
Stfa2	6.12017e-20	0.492764	0.218	0.028	1.03804e-15
Sdcbp	6.21983e-20	0.534404	0.613	0.786	1.05494e-15
Smpdl3a	6.3519e-20	-0.478814	0.314	0.633	1.07735e-15
Zdhhc6	6.93082e-20	-0.42808	0.052	0.301	1.17554e-15
Rcbtb2	7.16741e-20	-0.33851	0.033	0.258	1.21567e-15
Ift27	7.41988e-20	-0.323787	0.004	0.185	1.25849e-15
Polr2d	7.49094e-20	-0.398281	0.015	0.223	1.27054e-15
Cdkn1a	7.50408e-20	-0.413992	0.185	0.497	1.27277e-15
Gnpat	7.58262e-20	-0.331391	0.063	0.312	1.28609e-15
Pon2	7.82524e-20	-0.442076	0.063	0.323	1.32724e-15
Ptpro	7.8867e-20	-0.343327	0.018	0.219	1.33766e-15
Srrt	8.00485e-20	-0.294201	0.055	0.289	1.3577e-15
Chit1	8.45211e-20	-0.602987	0.011	0.199	1.43356e-15
Fn1	8.6627e-20	-0.678277	0.114	0.319	1.46928e-15
Gipc1	8.89076e-20	-0.474244	0.111	0.367	1.50796e-15
Ncaph	9.08574e-20	-0.339588	0.037	0.239	1.54103e-15
Glrx	9.5657e-20	0.769848	0.76	0.795	1.62244e-15
Snx17	9.6379e-20	-0.462053	0.066	0.324	1.63468e-15
Raf1	9.703e-20	0.861878	0.491	0.495	1.64573e-15
Dleu2	1.04228e-19	0.754487	0.476	0.481	1.76781e-15
Ube2c	1.1837e-19	-1.1325	0.247	0.435	2.00767e-15
Psmc5	1.20074e-19	-0.611804	0.048	0.281	2.03657e-15
D4Wsu53e	1.22625e-19	0.537714	0.583	0.782	2.07984e-15
Golim4	1.23404e-19	-0.252687	0.111	0.397	2.09305e-15
Morf4l2	1.25481e-19	-0.2658	0.077	0.346	2.12829e-15
Marcksl1	1.30556e-19	0.619601	0.229	0.272	2.21436e-15
Abhd12	1.32988e-19	-0.573984	0.03	0.252	2.25561e-15
Fkbp1a	1.33026e-19	-0.496869	0.048	0.258	2.25625e-15
Dcps	1.34561e-19	-0.393066	0.041	0.275	2.28228e-15
Nubp1	1.38875e-19	-0.381202	0.033	0.247	2.35545e-15
Mrps17	1.41147e-19	-0.270296	0.03	0.252	2.394e-15
Drg1	1.5123e-19	-0.351655	0.063	0.32	2.56501e-15
Phyh	1.55917e-19	0.789535	0.258	0.343	2.64451e-15
1700020L24Rik	1.57186e-19	-0.344713	0	0.164	2.66603e-15
Mlst8	1.65293e-19	-0.39395	0.052	0.298	2.80353e-15
Sec31a	1.66722e-19	-0.253436	0.037	0.263	2.82778e-15
Plscr1	1.68113e-19	-0.390496	0.081	0.347	2.85137e-15
1700123O20Rik	1.74544e-19	-0.330636	0.077	0.345	2.96043e-15
Pxn	1.77084e-19	0.477013	0.535	0.642	3.00352e-15
Snrpd2	1.87805e-19	-0.403096	0.03	0.255	3.18535e-15
Ndufs3	1.90695e-19	-0.307871	0.026	0.246	3.23438e-15
Agpat2	1.92795e-19	-0.560693	0.077	0.343	3.27e-15
Aurka	2.11607e-19	-0.521389	0.063	0.25	3.58907e-15
Fbxo5	2.1658e-19	-0.313219	0.015	0.207	3.67341e-15
Snrpb2	2.23524e-19	-0.308576	0.041	0.275	3.79119e-15
Rbm10	2.27412e-19	-0.299951	0.048	0.273	3.85713e-15
Idh3a	2.38412e-19	-0.322858	0.03	0.219	4.0437e-15
Pla2g7	2.4639e-19	1.13427	0.605	0.363	4.17902e-15
Neat1	2.52975e-19	0.765459	0.546	0.665	4.2907e-15
Rpa1	2.53336e-19	-0.346691	0.044	0.273	4.29684e-15
Snw1	2.71716e-19	-0.336254	0.066	0.32	4.60858e-15
Cebpd	2.76748e-19	0.918	0.502	0.493	4.69392e-15
Emr4	2.939e-19	-1.10044	0.055	0.267	4.98483e-15
Pgd	2.99774e-19	0.793709	0.731	0.772	5.08447e-15
Nt5c	3.01675e-19	-0.486531	0.044	0.267	5.11671e-15
Gpaa1	3.03568e-19	-0.486679	0.033	0.231	5.14882e-15
Hectd1	3.03737e-19	0.278568	0.317	0.449	5.15169e-15
Tmem109	3.04229e-19	-0.650933	0.052	0.218	5.16003e-15
Dpagt1	3.07119e-19	-0.309128	0.03	0.238	5.20904e-15
N6amt2	3.07399e-19	-0.429928	0	0.162	5.2138e-15
Hdac1	3.08293e-19	-0.28772	0.092	0.365	5.22897e-15
Dnajb11	3.20588e-19	-0.426636	0.218	0.469	5.4375e-15
Nrm	3.29402e-19	-0.596191	0.041	0.244	5.58699e-15
Clcc1	3.46853e-19	-0.294907	0.015	0.212	5.88297e-15
Aco2	3.52718e-19	-0.423147	0.063	0.313	5.98245e-15
Ffar2	3.75884e-19	-0.405155	0.018	0.228	6.37537e-15
Prom1	3.83406e-19	-0.258153	0.007	0.192	6.50295e-15
Furin	3.84962e-19	0.253627	0.306	0.493	6.52934e-15
Csnk1a1	4.01961e-19	-0.273082	0.155	0.453	6.81766e-15
Cndp2	4.08759e-19	-0.334326	0.085	0.352	6.93297e-15
Arcn1	4.24108e-19	-0.292261	0.096	0.368	7.19329e-15
2310045N01Rik	4.24224e-19	-0.269656	0.022	0.224	7.19527e-15
Rpp21	4.70851e-19	-0.300949	0.063	0.303	7.98611e-15
Il1r2	4.72497e-19	1.27448	0.384	0.128	8.01402e-15
Timm50	4.80232e-19	-0.519958	0.041	0.258	8.14522e-15
Naa40	4.87314e-19	-0.27568	0.018	0.223	8.26533e-15
Mrpl2	4.9167e-19	-0.430297	0.011	0.207	8.33921e-15
Trappc4	5.52795e-19	-0.315133	0.048	0.283	9.37595e-15
Kars	5.77251e-19	-0.285179	0.048	0.287	9.79076e-15
Atp6v1b2	5.89605e-19	0.25892	0.376	0.636	1.00003e-14
Ninj1	6.02897e-19	1.25527	0.262	0.251	1.02257e-14
Dctn6	6.24231e-19	-0.568071	0.052	0.29	1.05876e-14
Slc35a4	6.29357e-19	-0.321453	0.066	0.318	1.06745e-14
Asprv1	6.32824e-19	1.78725	0.196	0.055	1.07333e-14
Slc2a6	6.37653e-19	1.19113	0.373	0.197	1.08152e-14
Reep4	6.65343e-19	-0.473629	0.044	0.21	1.12849e-14
Tmx2	6.98557e-19	-0.466768	0.055	0.257	1.18482e-14
Pbk	7.09199e-19	-0.428114	0.015	0.196	1.20287e-14
Cnpy2	7.24685e-19	-0.367782	0.018	0.225	1.22914e-14
Stoml2	7.56918e-19	-0.378664	0.044	0.28	1.28381e-14
Hsf1	7.84526e-19	-0.341446	0.007	0.19	1.33063e-14
Fam195b	7.859e-19	-0.385453	0.048	0.284	1.33296e-14
Bccip	8.07645e-19	-0.42814	0.033	0.21	1.36985e-14
Id2	8.47359e-19	-0.426071	0.074	0.333	1.43721e-14
Mrps26	9.02883e-19	-0.504673	0.026	0.23	1.53138e-14
Rfc4	9.15297e-19	-0.393775	0.011	0.194	1.55243e-14
Gca	9.52001e-19	-0.334732	0.074	0.33	1.61469e-14
Myadm	9.90069e-19	0.983759	0.613	0.546	1.67926e-14
Gm6644	1.00647e-18	-0.581977	0.048	0.258	1.70707e-14
Ifitm6	1.08085e-18	-0.704951	0.454	0.755	1.83322e-14
C1galt1c1	1.08549e-18	-0.655517	0.052	0.248	1.8411e-14
Ogt	1.138e-18	0.507006	0.48	0.451	1.93017e-14
Got1	1.14578e-18	-0.345762	0.015	0.196	1.94335e-14
1810009A15Rik	1.1653e-18	-0.457652	0.026	0.233	1.97646e-14
Rara	1.18105e-18	0.81259	0.52	0.417	2.00319e-14
Rbmxl1	1.18938e-18	-0.426965	0.044	0.257	2.0173e-14
Chordc1	1.20481e-18	-0.253281	0.015	0.214	2.04348e-14
Timm17a	1.21359e-18	-0.468798	0.063	0.308	2.05836e-14
Fam60a	1.29006e-18	-0.258353	0.007	0.19	2.18807e-14
Clec4a3	1.3042e-18	-1.17612	0.111	0.337	2.21205e-14
2810428I15Rik	1.30713e-18	-0.352341	0.007	0.19	2.21703e-14
Hsd17b12	1.32988e-18	-0.376497	0.018	0.21	2.25561e-14
Ndufaf3	1.3379e-18	-0.3295	0.004	0.175	2.26921e-14
Lsm3	1.34226e-18	-0.488702	0.022	0.222	2.2766e-14
Psmd5	1.3686e-18	-0.442693	0.037	0.248	2.32128e-14
Cds2	1.47003e-18	0.437985	0.391	0.396	2.49332e-14
Arhgap9	1.56433e-18	0.35221	0.384	0.638	2.65326e-14
Lsmd1	1.58483e-18	-0.306345	0.015	0.213	2.68802e-14
Sucla2	1.61542e-18	-0.399567	0.037	0.253	2.73992e-14
Trappc2l	1.72401e-18	-0.300382	0.037	0.251	2.92409e-14
Gars	1.72891e-18	-0.323988	0.041	0.27	2.93241e-14
Hdac3	1.79262e-18	-0.300721	0.037	0.258	3.04046e-14
Lat2	1.80257e-18	-0.722329	0.074	0.311	3.05733e-14
Rnf7	1.93754e-18	-0.257329	0.055	0.285	3.28627e-14
Bcl10	1.97038e-18	0.696499	0.232	0.343	3.34195e-14
Evi2b	2.02115e-18	0.694551	0.775	0.845	3.42807e-14
Mpv17l2	2.0218e-18	-0.3849	0.007	0.191	3.42917e-14
Carhsp1	2.22252e-18	0.706095	0.321	0.364	3.76962e-14
Elof1	2.33481e-18	-0.377279	0.044	0.276	3.96008e-14
Elp2	2.3812e-18	-0.393669	0.037	0.245	4.03876e-14
Ift20	2.41793e-18	-0.262403	0.03	0.229	4.10105e-14
Tufm	2.61339e-18	-0.41717	0.03	0.235	4.43257e-14
Tmem173	2.63737e-18	-0.396123	0.03	0.218	4.47324e-14
Tnfaip8	2.64609e-18	0.289546	0.236	0.451	4.48804e-14
Kif20a	2.69949e-18	-0.416204	0.07	0.268	4.57861e-14
Atp6ap1	2.73796e-18	0.416137	0.339	0.572	4.64385e-14
Iscu	2.87605e-18	0.414666	0.221	0.398	4.87807e-14
Prkar1a	2.97773e-18	0.287777	0.428	0.703	5.05053e-14
Impa2	3.14112e-18	-0.325146	0.055	0.29	5.32765e-14
Cdt1	3.14773e-18	-0.36482	0.03	0.218	5.33886e-14
Ccl9	3.18368e-18	-0.505093	0.336	0.484	5.39983e-14
Txnl4a	3.18776e-18	-0.486855	0.664	0.81	5.40675e-14
Psmd3	3.21544e-18	-0.384866	0.033	0.248	5.45371e-14
Fkbp4	3.30075e-18	-0.353321	0.063	0.295	5.59841e-14
Fkbp8	3.3119e-18	-0.317918	0.122	0.398	5.61731e-14
Nsfl1c	3.46775e-18	-0.378361	0.026	0.23	5.88165e-14
Acd	3.51187e-18	-0.30609	0.018	0.219	5.95648e-14
Taf6	3.55304e-18	-0.404193	0.033	0.222	6.02631e-14
Atxn7l1	3.67325e-18	0.493553	0.28	0.401	6.2302e-14
Ap3m1	3.69163e-18	-0.256986	0.089	0.348	6.26137e-14
Cib1	3.74851e-18	0.333413	0.129	0.306	6.35784e-14
Ly6e	3.99241e-18	-0.52475	0.76	0.915	6.77153e-14
Psma4	4.00496e-18	-0.428928	0.081	0.337	6.79281e-14
Ip6k1	4.03955e-18	0.939599	0.358	0.3	6.85149e-14
Prss57	4.13114e-18	-0.506443	0.026	0.219	7.00682e-14
Eif4e	4.25831e-18	-0.342871	0.037	0.246	7.22252e-14
Cdca7l	4.27366e-18	-0.294869	0.011	0.19	7.24856e-14
Gins4	4.79392e-18	-0.396315	0.015	0.195	8.13097e-14
Hat1	4.79964e-18	-0.380237	0.022	0.222	8.14066e-14
Ramp1	5.00399e-18	-0.273824	0.033	0.246	8.48726e-14
Tssc4	5.05472e-18	-0.388486	0.015	0.184	8.57331e-14
Tmem147	5.19155e-18	-0.562306	0.033	0.206	8.80538e-14
Vps16	5.40929e-18	-0.354204	0.033	0.246	9.1747e-14
Arhgap25	5.74183e-18	1.08781	0.395	0.294	9.73872e-14
Ucp2	5.82997e-18	-0.311967	0.756	0.942	9.88821e-14
Pgs1	6.07655e-18	0.309135	0.17	0.363	1.03064e-13
Vps41	6.47341e-18	-0.325783	0.011	0.191	1.09796e-13
Rbms1	6.60563e-18	0.454366	0.317	0.498	1.12038e-13
Hdac5	6.64705e-18	0.290314	0.137	0.284	1.12741e-13
Gpr114	6.84747e-18	-0.491233	0.018	0.203	1.1614e-13
Tmem242	6.96122e-18	-0.380261	0.026	0.233	1.18069e-13
Fam103a1	7.34732e-18	0.306616	0.17	0.325	1.24618e-13
Ndufb6	7.7631e-18	-0.485339	0.048	0.278	1.3167e-13
Ccnf	7.88229e-18	-0.32194	0.03	0.218	1.33692e-13
Kxd1	7.888e-18	-0.451703	0.033	0.25	1.33788e-13
Ndfip1	7.99403e-18	0.292118	0.269	0.492	1.35587e-13
Dennd2d	8.20048e-18	0.463411	0.229	0.347	1.39088e-13
Cx3cr1	8.95998e-18	-1.03651	0.299	0.414	1.5197e-13
Adh5	9.01451e-18	-0.423693	0.059	0.286	1.52895e-13
Rbm39	9.04477e-18	0.355614	0.742	0.926	1.53408e-13
Tax1bp1	9.1237e-18	0.454611	0.373	0.597	1.54747e-13
Pdha1	9.18999e-18	-0.344905	0.077	0.329	1.55871e-13
Aldh16a1	9.47922e-18	-0.266678	0.018	0.216	1.60777e-13
Trappc1	9.76162e-18	-0.342501	0.085	0.339	1.65567e-13
Prdx3	9.95862e-18	-0.522354	0.059	0.266	1.68908e-13
Bcap29	1.0149e-17	-0.266428	0.007	0.179	1.72138e-13
Slc35b1	1.03011e-17	-0.441186	0.018	0.208	1.74717e-13
Mrpl12	1.06595e-17	-0.423863	0.011	0.181	1.80796e-13
Pid1	1.07281e-17	-0.368305	0.059	0.28	1.81959e-13
Gys1	1.12261e-17	-0.315714	0.048	0.276	1.90405e-13
Pram1	1.14808e-17	0.654186	0.638	0.681	1.94725e-13
Sat1	1.16225e-17	0.438122	0.875	0.959	1.9713e-13
Aarsd1	1.27328e-17	-0.478589	0.03	0.207	2.1596e-13
Prr14	1.31797e-17	0.338432	0.295	0.516	2.2354e-13
Ccnb1	1.32171e-17	-0.602969	0.066	0.281	2.24175e-13
Hmbs	1.32819e-17	-0.405006	0.03	0.205	2.25275e-13
Lrch4	1.35968e-17	0.406761	0.38	0.585	2.30615e-13
Chrac1	1.37326e-17	-0.377732	0.055	0.29	2.32918e-13
Abcf2	1.38698e-17	-0.34287	0.048	0.264	2.35246e-13
Mcm2	1.45639e-17	-0.386397	0.052	0.245	2.47017e-13
Rsl1d1	1.49753e-17	-0.332356	0.018	0.195	2.53996e-13
Dpm3	1.50965e-17	-0.288192	0.007	0.172	2.56052e-13
Naa20	1.51026e-17	-0.385478	0.018	0.208	2.56155e-13
Tmem59	1.53486e-17	0.326912	0.325	0.547	2.60328e-13
Ppapdc1b	1.54289e-17	-0.268481	0.004	0.168	2.6169e-13
Nhp2l1	1.56811e-17	-0.49147	0.063	0.289	2.65967e-13
Sra1	1.58306e-17	0.357752	0.096	0.255	2.68502e-13
Tfg	1.62021e-17	-0.252832	0.059	0.295	2.74804e-13
Clec4e	1.74961e-17	1.00732	0.465	0.266	2.96752e-13
Shmt2	1.75033e-17	-0.404999	0.041	0.206	2.96873e-13
Scpep1	1.83733e-17	-0.532294	0.052	0.251	3.1163e-13
Arhgap24	1.8518e-17	0.512748	0.221	0.049	3.14084e-13
Gmppa	1.85417e-17	-0.380779	0.011	0.194	3.14485e-13
Ap1s1	1.86484e-17	-0.304142	0.052	0.281	3.16296e-13
Fam32a	1.88963e-17	0.831944	0.428	0.505	3.205e-13
H2-K1	2.01468e-17	-0.409966	0.373	0.66	3.4171e-13
Anapc15	2.0828e-17	-0.372629	0.015	0.202	3.53264e-13
Brcc3	2.32538e-17	-0.319808	0.026	0.229	3.94408e-13
Gtf2e2	2.32776e-17	-0.322626	0.055	0.285	3.94811e-13
Pfdn2	2.44836e-17	-0.279046	0.007	0.181	4.15266e-13
Actl6a	2.50977e-17	-0.34446	0.022	0.216	4.25682e-13
Spint2	2.57216e-17	-0.376527	0.011	0.191	4.36264e-13
Shcbp1	2.57789e-17	-0.279316	0.015	0.189	4.37236e-13
Wbscr22	2.60251e-17	-0.392469	0.015	0.186	4.41412e-13
Ndufa7	2.63827e-17	0.269327	0.111	0.289	4.47478e-13
Letm1	2.65579e-17	-0.311492	0.044	0.252	4.50449e-13
Zfp36l2	2.66834e-17	0.416356	0.402	0.487	4.52577e-13
Mnf1	2.87974e-17	-0.250705	0.011	0.167	4.88433e-13
Rab8a	2.95162e-17	0.350089	0.391	0.626	5.00625e-13
Fam69a	3.03576e-17	-0.331852	0.026	0.207	5.14895e-13
Anxa11	3.07279e-17	0.322407	0.52	0.638	5.21176e-13
Cops3	3.08148e-17	-0.395172	0.041	0.255	5.2265e-13
Fam107b	3.13812e-17	0.272301	0.494	0.741	5.32257e-13
Nop56	3.28379e-17	-0.437895	0.055	0.27	5.56963e-13
Hist1h1b	3.5632e-17	-0.533652	0.026	0.208	6.04354e-13
Snap23	3.61758e-17	0.888025	0.354	0.335	6.13577e-13
Hist1h2ao	3.68029e-17	-1.13518	0.232	0.523	6.24214e-13
Haus5	3.99795e-17	-0.310669	0.018	0.194	6.78093e-13
Cyb5	4.12895e-17	-0.282719	0.114	0.374	7.00312e-13
Chp1	4.27065e-17	0.330829	0.373	0.629	7.24345e-13
Ssbp4	4.31438e-17	-0.280055	0.026	0.227	7.31761e-13
Akt1	4.3639e-17	0.656594	0.177	0.203	7.4016e-13
Yipf3	4.37563e-17	-0.333536	0.059	0.291	7.4215e-13
Blvra	4.3872e-17	-0.446936	0.044	0.238	7.44112e-13
Atp6v1c1	4.4031e-17	-0.333417	0.066	0.302	7.46809e-13
Blmh	4.45859e-17	-0.281313	0.033	0.242	7.56221e-13
Cr1l	4.48525e-17	0.40965	0.148	0.323	7.60743e-13
Nup62	4.85111e-17	-0.408725	0.041	0.206	8.22797e-13
Mcl1	4.87538e-17	0.41857	0.292	0.412	8.26913e-13
Chchd1	4.91436e-17	-0.314499	0.011	0.19	8.33525e-13
Pold1	4.97369e-17	-0.266855	0.03	0.207	8.43588e-13
Acadl	5.03295e-17	-0.263848	0.026	0.227	8.53639e-13
Lasp1	5.05502e-17	0.443519	0.439	0.614	8.57382e-13
Rpp30	5.21532e-17	-0.28828	0.004	0.164	8.8457e-13
Palm	5.26892e-17	0.383742	0.155	0.291	8.93662e-13
AI607873	5.35707e-17	-0.255201	0.03	0.234	9.08613e-13
Cdc26	5.38301e-17	-0.25741	0.03	0.227	9.13012e-13
Tssc1	5.38414e-17	-0.407246	0.011	0.19	9.13205e-13
Phb2	5.52216e-17	-0.360249	0.081	0.326	9.36613e-13
Ripk3	5.5311e-17	-0.386681	0.03	0.2	9.3813e-13
Asah1	6.29217e-17	-0.337849	0.14	0.412	1.06721e-12
Tubg1	6.43631e-17	-0.390982	0.018	0.202	1.09166e-12
Cfdp1	6.57027e-17	-0.419872	0.026	0.225	1.11438e-12
Nusap1	7.01141e-17	-0.31514	0.055	0.264	1.18921e-12
Mafg	7.10188e-17	0.455687	0.196	0.29	1.20455e-12
Cldn1	7.21522e-17	-0.34192	0.022	0.205	1.22377e-12
Nfam1	7.56299e-17	0.779177	0.742	0.804	1.28276e-12
Ostf1	7.6047e-17	0.458748	0.753	0.894	1.28983e-12
Mid1ip1	7.64143e-17	0.335199	0.262	0.497	1.29606e-12
Gba	7.80628e-17	-0.425202	0.055	0.28	1.32402e-12
Rab7l1	7.93953e-17	-0.512126	0.066	0.3	1.34662e-12
Yif1b	8.22628e-17	-0.313783	0.03	0.233	1.39526e-12
Igsf6	8.25382e-17	0.25308	0.579	0.826	1.39993e-12
Mrps18a	8.27759e-17	-0.367261	0.044	0.262	1.40396e-12
Klf6	8.31694e-17	0.778498	0.62	0.661	1.41064e-12
Cnpy4	8.5012e-17	-0.316506	0.03	0.201	1.44189e-12
Fes	8.89412e-17	0.430364	0.421	0.626	1.50853e-12
Gmpr2	9.78856e-17	-0.269944	0.018	0.205	1.66024e-12
Snrnp25	9.80369e-17	-0.427352	0.011	0.179	1.6628e-12
Ica1	1.00055e-16	-0.378095	0.015	0.181	1.69704e-12
Supt4a	1.00088e-16	0.523527	0.255	0.378	1.69759e-12
Mthfd2	1.00719e-16	-0.308903	0.033	0.238	1.7083e-12
Rgs10	1.1294e-16	-0.511335	0.015	0.185	1.91558e-12
Sec23b	1.1449e-16	-0.336988	0.033	0.213	1.94186e-12
Srp68	1.24421e-16	-0.329665	0.033	0.239	2.11031e-12
Lmf2	1.26319e-16	-0.337262	0.055	0.256	2.1425e-12
Pmf1	1.30298e-16	-0.384972	0.059	0.286	2.20998e-12
Eif4b	1.39915e-16	-0.305105	0.092	0.328	2.3731e-12
Tspan31	1.46127e-16	-0.486282	0.111	0.302	2.47845e-12
Slc50a1	1.52875e-16	-0.376352	0.018	0.202	2.59291e-12
Abcg1	1.53794e-16	0.599821	0.513	0.441	2.6085e-12
Ergic3	1.60427e-16	-0.37414	0.114	0.368	2.721e-12
Fam21	1.67331e-16	0.471065	0.258	0.352	2.8381e-12
Gpr108	1.67465e-16	-0.428792	0.111	0.362	2.84037e-12
Rae1	1.74674e-16	-0.416494	0.033	0.222	2.96265e-12
Txnip	1.8609e-16	0.982672	0.369	0.298	3.15628e-12
Snapin	1.89698e-16	-0.358553	0.026	0.219	3.21747e-12
Ubr7	2.01183e-16	-0.29647	0.033	0.22	3.41227e-12
Pik3cd	2.06872e-16	0.261086	0.21	0.4	3.50876e-12
Plek	2.11697e-16	0.917368	0.546	0.391	3.59059e-12
Fos	2.13734e-16	1.1355	0.686	0.516	3.62513e-12
Paip2	2.18975e-16	0.475295	0.251	0.452	3.71403e-12
BC035044	2.24803e-16	-0.344592	0.026	0.212	3.81289e-12
Creld2	2.25568e-16	-0.404676	0.044	0.252	3.82587e-12
Hspa14	2.33428e-16	-0.318244	0.052	0.272	3.95917e-12
Pilra	2.38688e-16	0.684659	0.69	0.744	4.04839e-12
Spop	2.44773e-16	0.449702	0.354	0.569	4.1516e-12
Sf3a3	2.49978e-16	-0.365073	0.044	0.242	4.23988e-12
Cct3	2.60472e-16	-0.391725	0.033	0.23	4.41786e-12
Pex2	2.63224e-16	-0.252616	0.018	0.192	4.46454e-12
Zmynd11	2.6992e-16	0.558545	0.207	0.214	4.57811e-12
Exosc7	2.71509e-16	-0.516682	0.044	0.229	4.60506e-12
Dhx38	2.72844e-16	0.267343	0.1	0.22	4.62772e-12
Rnf144a	2.74825e-16	0.546933	0.299	0.13	4.66131e-12
Mpo	2.8616e-16	-3.20439	0.159	0.387	4.85357e-12
Hspe1	2.86698e-16	-0.268574	0.041	0.242	4.86269e-12
Akna	2.88549e-16	0.438167	0.598	0.732	4.89408e-12
Mrpl36	3.06692e-16	-0.446688	0.041	0.242	5.2018e-12
Pttg1	3.0733e-16	-0.418774	0.059	0.281	5.21262e-12
Pepd	3.28192e-16	-0.422026	0.037	0.228	5.56646e-12
Wbp5	3.28364e-16	-0.318475	0.022	0.19	5.56938e-12
Fbl	3.49335e-16	-0.326662	0.03	0.208	5.92507e-12
Thap7	3.65639e-16	-0.316508	0.007	0.164	6.2016e-12
Tmem214	3.65699e-16	-0.285624	0.007	0.171	6.20262e-12
Lmo4	3.66794e-16	0.296451	0.428	0.635	6.22119e-12
Nkiras2	4.09011e-16	-0.467702	0.07	0.3	6.93724e-12
Ltv1	4.31992e-16	-0.296399	0.018	0.201	7.32701e-12
Vasp	4.5553e-16	0.520477	0.705	0.793	7.72625e-12
Eif2a	4.58666e-16	-0.30343	0.022	0.199	7.77943e-12
Eci2	4.65975e-16	-0.338879	0.018	0.2	7.9034e-12
Tsta3	4.80004e-16	-0.42207	0.022	0.199	8.14135e-12
Prim1	4.87009e-16	-0.262962	0.018	0.185	8.26017e-12
Bfar	5.07785e-16	-0.281585	0.015	0.19	8.61255e-12
Dnm2	5.13301e-16	0.355879	0.399	0.632	8.7061e-12
Fam129a	5.14908e-16	0.900416	0.494	0.404	8.73335e-12
Nop58	5.40809e-16	-0.272203	0.026	0.195	9.17267e-12
Adrbk1	5.49778e-16	0.452973	0.45	0.605	9.32478e-12
Fzr1	5.55138e-16	-0.348087	0.037	0.24	9.41569e-12
Snx4	5.63399e-16	0.326832	0.192	0.402	9.55581e-12
Ptplad2	5.8829e-16	0.862673	0.439	0.35	9.97798e-12
C1qbp	6.26853e-16	-0.504258	0.055	0.216	1.0632e-11
Gemin7	6.38728e-16	-0.256695	0.048	0.241	1.08335e-11
Tnfrsf1b	6.47044e-16	-0.385529	0.085	0.317	1.09745e-11
Mrps24	6.49747e-16	-0.266477	0.118	0.363	1.10204e-11
l7Rn6	6.81615e-16	-0.296336	0.011	0.18	1.15609e-11
2610002J02Rik	6.90334e-16	-0.358445	0.018	0.196	1.17088e-11
Slmo2	6.9213e-16	-0.295398	0.07	0.296	1.17392e-11
Cdc45	7.0973e-16	-0.382324	0.044	0.233	1.20377e-11
Psat1	7.12803e-16	-0.319067	0.018	0.18	1.20898e-11
Farsa	7.39598e-16	-0.476327	0.037	0.203	1.25443e-11
Rabac1	7.54791e-16	0.34016	0.196	0.352	1.2802e-11
Cdkn2aipnl	7.72611e-16	0.319267	0.144	0.335	1.31043e-11
Fcnb	7.76152e-16	-0.643632	0.015	0.177	1.31643e-11
Hspd1	8.76348e-16	-0.251969	0.077	0.309	1.48637e-11
Hipk1	9.0814e-16	0.279435	0.369	0.507	1.5403e-11
5031425E22Rik	9.34237e-16	0.273255	0.185	0.216	1.58456e-11
Ebp	9.3958e-16	-0.267065	0.055	0.272	1.59362e-11
Prdx4	1.01534e-15	-0.505959	0.022	0.179	1.72212e-11
Pes1	1.06825e-15	-0.309166	0.048	0.244	1.81186e-11
Ddx60	1.06966e-15	0.617352	0.325	0.151	1.81425e-11
Rrp7a	1.07416e-15	-0.34398	0.044	0.248	1.82189e-11
Ptgs2	1.08375e-15	0.614184	0.137	0.022	1.83815e-11
Phb	1.148e-15	-0.378385	0.063	0.269	1.94713e-11
Ormdl2	1.15206e-15	-0.273269	0.063	0.266	1.954e-11
Mir22hg	1.21394e-15	0.650488	0.151	0.119	2.05896e-11
Cops7b	1.2259e-15	-0.270866	0.018	0.191	2.07925e-11
Mfap1b	1.25748e-15	0.523916	0.196	0.294	2.13281e-11
Tfdp1	1.29582e-15	-0.299002	0.162	0.429	2.19785e-11
Hcls1	1.41355e-15	0.563664	0.557	0.713	2.39753e-11
Stat3	1.56983e-15	0.396016	0.421	0.586	2.66258e-11
Pold2	1.59052e-15	-0.350286	0.011	0.164	2.69768e-11
Rnf130	1.59069e-15	0.324455	0.14	0.311	2.69796e-11
AI467606	1.59744e-15	0.907705	0.354	0.376	2.70943e-11
Emd	1.6238e-15	-0.330582	0.066	0.289	2.75413e-11
Hpse	1.68209e-15	-0.316209	0.033	0.196	2.853e-11
Plbd1	1.68729e-15	-0.433533	0.616	0.825	2.86182e-11
Slc24a6	1.69721e-15	-0.290746	0.328	0.585	2.87865e-11
Nudt16l1	1.72592e-15	-0.402794	0.011	0.177	2.92733e-11
Hadhb	1.75294e-15	-0.358475	0.044	0.244	2.97316e-11
Emc4	1.76774e-15	-0.371408	0.03	0.218	2.99826e-11
Cops5	1.77334e-15	-0.325594	0.041	0.236	3.00777e-11
Stat6	1.84952e-15	0.618985	0.421	0.533	3.13697e-11
Wdr61	1.85013e-15	-0.418233	0.048	0.233	3.13801e-11
Mrps36	2.09344e-15	-0.297146	0.018	0.189	3.55069e-11
Ftsjd2	2.09398e-15	0.431668	0.225	0.371	3.5516e-11
Atp6v1h	2.13744e-15	-0.318247	0.066	0.28	3.62531e-11
Rnf4	2.23163e-15	-0.294504	0.133	0.382	3.78506e-11
Wars	2.27888e-15	-0.346967	0.026	0.192	3.86521e-11
Med21	2.37788e-15	-0.32518	0.041	0.241	4.03311e-11
Hes6	2.46883e-15	-0.371802	0.026	0.21	4.18739e-11
Rasal3	2.62574e-15	-0.263319	0.026	0.211	4.45352e-11
Tubb4b	2.81634e-15	-0.378345	0.214	0.481	4.77679e-11
Alox5ap	2.86384e-15	0.519703	0.871	0.949	4.85736e-11
Mrpl40	2.88158e-15	-0.368236	0.151	0.333	4.88745e-11
Serp1	3.00494e-15	0.428163	0.498	0.71	5.09667e-11
Pde6d	3.02689e-15	-0.274491	0.03	0.217	5.13391e-11
Rasa4	3.05871e-15	-0.381385	0.037	0.222	5.18788e-11
Dnaja2	3.15043e-15	-0.256157	0.1	0.339	5.34345e-11
Orm1	3.23167e-15	-0.493505	0.018	0.166	5.48123e-11
Crcp	3.30708e-15	-0.378076	0.018	0.188	5.60913e-11
Faim	3.37312e-15	-0.278009	0.018	0.189	5.72115e-11
Cops7a	3.39031e-15	-0.313451	0.022	0.199	5.7503e-11
Nt5c3	3.49208e-15	-0.251861	0.055	0.263	5.92291e-11
Cd68	3.51998e-15	-0.643308	0.188	0.446	5.97024e-11
Bloc1s1	4.0118e-15	-0.262387	0.048	0.238	6.80441e-11
Sar1b	4.11261e-15	-0.316462	0.044	0.246	6.97541e-11
Tomm40	4.21643e-15	-0.399825	0.052	0.184	7.15149e-11
Rfc2	4.26453e-15	-0.291031	0.166	0.428	7.23307e-11
Tnfsf14	4.52715e-15	1.23854	0.218	0.08	7.6785e-11
1300018J18Rik	4.59962e-15	-0.307446	0.026	0.208	7.80141e-11
Ifi27l1	4.60165e-15	0.453342	0.273	0.43	7.80486e-11
Dazap2	4.60646e-15	0.696985	0.86	0.94	7.81302e-11
Gsto1	4.95315e-15	-0.449805	0.044	0.216	8.40104e-11
Cd37	5.2502e-15	0.652755	0.502	0.618	8.90487e-11
Bst2	5.27686e-15	-0.518191	0.026	0.206	8.95007e-11
Rrp36	5.395e-15	-0.307107	0.015	0.181	9.15047e-11
Tmem192	5.53292e-15	-0.440312	0.011	0.167	9.38439e-11
Polr3c	5.56041e-15	-0.269726	0.052	0.258	9.431e-11
Mmadhc	5.92951e-15	-0.353231	0.052	0.258	1.0057e-10
Lsm7	6.19851e-15	-0.45735	0.015	0.161	1.05133e-10
Oasl2	6.2281e-15	1.19825	0.347	0.163	1.05635e-10
Ska2	6.23727e-15	-0.26477	0.018	0.172	1.0579e-10
Tmem170b	6.24891e-15	0.290436	0.41	0.57	1.05988e-10
Lypla1	6.8714e-15	-0.291895	0.343	0.569	1.16546e-10
Mrpl37	6.87278e-15	-0.317287	0.018	0.188	1.16569e-10
Srp14	7.41238e-15	0.293734	0.188	0.403	1.25721e-10
Mrps12	7.70234e-15	-0.412912	0.022	0.177	1.30639e-10
Cyb5r3	7.91903e-15	-0.279264	0.133	0.356	1.34315e-10
Nhp2	8.29063e-15	-0.297398	0.044	0.197	1.40617e-10
Tm2d2	8.29639e-15	-0.305367	0.074	0.292	1.40715e-10
Deb1	8.31994e-15	-0.258891	0.015	0.179	1.41115e-10
Rpa2	8.3215e-15	-0.383473	0.03	0.201	1.41141e-10
Gps1	8.36591e-15	-0.284723	0.041	0.235	1.41894e-10
Chmp1a	8.39071e-15	0.441163	0.207	0.407	1.42315e-10
Ankrd33b	8.46032e-15	0.77278	0.247	0.084	1.43495e-10
Tsnax	8.53062e-15	-0.343872	0.026	0.18	1.44688e-10
Gripap1	8.71948e-15	0.34612	0.185	0.342	1.47891e-10
Prdx2	8.72838e-15	-0.506945	0.033	0.217	1.48042e-10
2019-03-01	8.96078e-15	0.317472	0.203	0.387	1.51984e-10
Pycr2	9.10503e-15	-0.423376	0.022	0.196	1.5443e-10
Pkm	9.12567e-15	0.553603	0.956	0.968	1.5478e-10
Ctsg	9.4453e-15	-1.86309	0.074	0.251	1.60202e-10
Arhgef39	1.03089e-14	-0.357879	0.03	0.184	1.74849e-10
Arl5c	1.03338e-14	-0.350633	0.004	0.144	1.75271e-10
Sigmar1	1.0371e-14	-0.384705	0.026	0.2	1.75903e-10
Sash3	1.05267e-14	0.253091	0.321	0.551	1.78543e-10
Men1	1.06048e-14	-0.25756	0.011	0.162	1.79868e-10
Ogdh	1.0797e-14	-0.283053	0.919	0.968	1.83128e-10
Hax1	1.17438e-14	-0.306095	0.052	0.255	1.99187e-10
Arfgap2	1.18442e-14	-0.284673	0.089	0.311	2.0089e-10
Jtb	1.23981e-14	-0.325919	0.033	0.218	2.10284e-10
Mthfs	1.25251e-14	0.363614	0.185	0.308	2.12439e-10
Poldip2	1.27062e-14	-0.350066	0.026	0.191	2.1551e-10
Pigx	1.28875e-14	0.304068	0.129	0.297	2.18585e-10
Slc40a1	1.31073e-14	1.09154	0.31	0.262	2.22312e-10
BC029214	1.33402e-14	0.279485	0.081	0.147	2.26264e-10
Arhgap15	1.37445e-14	0.265086	0.351	0.547	2.33121e-10
Slc9a3r2	1.392e-14	0.890485	0.192	0.134	2.36097e-10
Ggta1	1.42388e-14	-0.331989	0.041	0.211	2.41504e-10
Tpx2	1.42425e-14	-0.267071	0.332	0.518	2.41567e-10
Cdkn1b	1.44328e-14	0.432652	0.683	0.711	2.44795e-10
Tbc1d10c	1.45551e-14	0.985002	0.399	0.367	2.46868e-10
Paf1	1.49944e-14	-0.266914	0.089	0.314	2.54321e-10
Fam63a	1.52787e-14	0.694321	0.332	0.33	2.59143e-10
Txndc5	1.55499e-14	-0.450834	0.033	0.178	2.63742e-10
2310005G13Rik	1.64715e-14	-0.296524	0.011	0.156	2.79373e-10
Aaas	1.69415e-14	-0.368623	0.033	0.181	2.87345e-10
Nxt1	1.70813e-14	-0.43728	0.022	0.192	2.89715e-10
Csf2rb	1.7135e-14	0.352875	0.458	0.638	2.90627e-10
Akip1	1.76262e-14	-0.26941	0.004	0.141	2.98958e-10
Ace	1.79833e-14	-0.533753	0.015	0.166	3.05015e-10
Ehd1	1.96247e-14	0.602448	0.38	0.384	3.32854e-10
Hadh	1.97548e-14	-0.309598	0.018	0.166	3.35062e-10
Prkcsh	2.02935e-14	-0.260813	0.033	0.214	3.44198e-10
Pop5	2.04803e-14	-0.290269	0.004	0.139	3.47366e-10
Taf1b	2.11601e-14	-0.290224	0.022	0.18	3.58896e-10
Hsd17b4	2.21153e-14	-0.281365	0.03	0.208	3.75097e-10
Nelfa	2.26078e-14	-0.3274	0.074	0.286	3.83451e-10
Mctp1	2.54251e-14	0.440937	0.446	0.514	4.31236e-10
Osgep	2.59581e-14	-0.32645	0.03	0.172	4.40275e-10
Sh3glb1	2.63194e-14	0.507218	0.402	0.437	4.46404e-10
Cd302	2.64228e-14	-0.316923	0.026	0.201	4.48157e-10
Gm13363	2.6517e-14	0.557781	0.469	0.629	4.49755e-10
Naaa	2.70068e-14	-0.399545	0.081	0.264	4.58063e-10
Fmnl1	2.71486e-14	0.441164	0.609	0.644	4.60467e-10
Acap1	2.78546e-14	0.27158	0.225	0.401	4.72443e-10
Ptpn7	2.8145e-14	-0.279646	0.325	0.52	4.77367e-10
Gbp7	2.849e-14	0.26561	0.092	0.175	4.8322e-10
Taf12	2.998e-14	0.411476	0.1	0.223	5.0849e-10
R3hdm4	3.39186e-14	0.801028	0.797	0.848	5.75293e-10
Lpar6	3.74009e-14	-0.377855	0.1	0.325	6.34357e-10
Sqstm1	3.80888e-14	0.542149	0.517	0.677	6.46024e-10
D10Jhu81e	3.80995e-14	-0.352237	0.026	0.179	6.46206e-10
Hspa9	3.82337e-14	-0.32675	0.07	0.256	6.48481e-10
2019-09-01	3.93563e-14	-0.279911	0.089	0.309	6.67523e-10
Plgrkt	4.04166e-14	-0.336614	0.026	0.196	6.85506e-10
Cers5	4.23305e-14	-0.343252	0.041	0.223	7.17968e-10
Tars	4.25014e-14	-0.285317	0.041	0.184	7.20866e-10
Clec4a1	4.26354e-14	-0.668092	0.122	0.324	7.23139e-10
Ankrd10	4.30218e-14	-0.270405	0.015	0.167	7.29692e-10
Mad1l1	4.3901e-14	-0.307495	0.018	0.181	7.44606e-10
Trappc6a	4.48e-14	-0.367616	0.018	0.18	7.59852e-10
Zfp207	4.61817e-14	-0.381859	0.373	0.621	7.83288e-10
AB124611	4.69612e-14	0.733443	0.461	0.521	7.96509e-10
Chmp5	5.02096e-14	0.338515	0.185	0.357	8.51605e-10
Ptpn6	5.17216e-14	0.401149	0.694	0.877	8.77251e-10
Cxxc1	5.18433e-14	-0.320848	0.048	0.24	8.79314e-10
Rac2	5.23217e-14	0.53282	0.941	0.982	8.87428e-10
Nudt5	5.35783e-14	-0.273387	0.033	0.197	9.08742e-10
Mphosph6	5.40435e-14	-0.280103	0.004	0.14	9.16632e-10
Leprot	5.54097e-14	-0.281356	0.07	0.28	9.39804e-10
Neu1	5.67392e-14	0.271556	0.354	0.562	9.62353e-10
Sh3gl1	5.68064e-14	0.41135	0.159	0.309	9.63494e-10
Psmg2	5.68104e-14	-0.254288	0.007	0.151	9.6356e-10
Ngfrap1	5.69256e-14	-0.309811	0.018	0.153	9.65516e-10
Rit1	5.89957e-14	0.384022	0.155	0.234	1.00063e-09
Pole3	5.98746e-14	-0.318303	0.011	0.152	1.01553e-09
Llph	6.04166e-14	-0.314103	0.107	0.313	1.02473e-09
Hibadh	6.10088e-14	-0.281802	0.041	0.227	1.03477e-09
Fam49a	6.31673e-14	-0.343025	0.044	0.227	1.07138e-09
Zkscan3	6.39712e-14	-0.272409	0.004	0.138	1.08502e-09
Haus8	6.66137e-14	0.328574	0.085	0.214	1.12983e-09
Uck1	6.75641e-14	-0.29143	0.015	0.169	1.14595e-09
Trnau1ap	6.82889e-14	-0.25605	0.011	0.156	1.15825e-09
Hagh	6.84227e-14	-0.260636	0.059	0.25	1.16052e-09
Mrps7	7.11967e-14	-0.332703	0.037	0.175	1.20757e-09
Ppdpf	7.36312e-14	-0.282444	0.041	0.225	1.24886e-09
4933409K07Rik	7.5371e-14	0.304759	0.871	0.868	1.27837e-09
Tbc1d23	7.62873e-14	0.509033	0.185	0.205	1.29391e-09
Slc15a4	7.65165e-14	-0.289713	0.048	0.231	1.2978e-09
Slc25a17	7.70028e-14	-0.281581	0.048	0.24	1.30604e-09
Exosc5	7.70661e-14	-0.277246	0.03	0.202	1.30712e-09
Mis18a	8.48638e-14	-0.287183	0.03	0.195	1.43938e-09
Dnajc15	9.10347e-14	-0.435285	0.018	0.179	1.54404e-09
Polr2c	1.02206e-13	-0.306997	0.052	0.246	1.73352e-09
Ptgir	1.0486e-13	-0.297857	0.03	0.194	1.77853e-09
Wdr83	1.07241e-13	-0.31014	0.004	0.134	1.81892e-09
Cxcl2	1.07662e-13	0.595587	0.232	0.063	1.82606e-09
Sipa1	1.09789e-13	0.259479	0.339	0.558	1.86214e-09
Uchl3	1.15182e-13	-0.265308	0.026	0.195	1.9536e-09
Tpd52	1.1723e-13	0.943938	0.469	0.397	1.98833e-09
G0s2	1.24143e-13	0.93721	0.244	0.27	2.10558e-09
Ctsa	1.43428e-13	-0.283895	0.369	0.626	2.43269e-09
Yif1a	1.61267e-13	-0.251092	0.015	0.167	2.73524e-09
Lrrc25	1.61776e-13	0.516656	0.24	0.363	2.74388e-09
Mpzl3	1.71712e-13	0.79034	0.14	0.018	2.91241e-09
Ccs	1.73003e-13	-0.424785	0.011	0.144	2.9343e-09
Aspscr1	1.7852e-13	0.252741	0.14	0.329	3.02789e-09
Pin4	1.78979e-13	-0.255676	0.022	0.185	3.03566e-09
Prps1	1.81835e-13	-0.321597	0.026	0.163	3.0841e-09
Nde1	1.82013e-13	-0.307626	0.037	0.197	3.08713e-09
Abtb1	1.82403e-13	0.815742	0.362	0.379	3.09374e-09
Psmb7	1.86356e-13	-0.343854	0.033	0.208	3.16079e-09
Hmgb3	1.86561e-13	-0.272936	0.066	0.264	3.16425e-09
Lrrfip1	1.88632e-13	0.339075	0.513	0.697	3.19939e-09
Pik3ap1	2.12343e-13	-0.367799	0.059	0.253	3.60156e-09
Zmat5	2.15377e-13	-0.340674	0.015	0.164	3.653e-09
Ccdc22	2.28995e-13	-0.302842	0.018	0.16	3.88399e-09
Lgmn	2.29242e-13	-0.683995	0.048	0.219	3.88817e-09
Elp5	2.317e-13	-0.340875	0.026	0.158	3.92986e-09
Tmem106c	2.3863e-13	-0.327505	0.018	0.155	4.04741e-09
Pebp1	2.41653e-13	-0.390678	0.107	0.322	4.09867e-09
Abhd11	2.41711e-13	-0.337776	0.026	0.177	4.09966e-09
Cd180	2.4737e-13	-0.302848	0.015	0.158	4.19564e-09
Osbpl9	2.47388e-13	0.688306	0.417	0.46	4.19595e-09
Stard3	2.59777e-13	-0.297749	0.081	0.29	4.40608e-09
Rnf13	2.6105e-13	0.389911	0.244	0.375	4.42766e-09
Bmyc	2.66634e-13	-0.342899	0.004	0.129	4.52237e-09
Atad1	2.76878e-13	-0.271339	0.041	0.22	4.69613e-09
Adrbk2	2.84684e-13	-0.458782	0.055	0.224	4.82853e-09
Lrrc8d	2.86027e-13	0.254744	0.229	0.365	4.85131e-09
Ptcd2	2.9405e-13	-0.251944	0.018	0.174	4.98738e-09
Arid4b	2.97742e-13	0.309921	0.166	0.216	5.05001e-09
Mov10	3.26468e-13	0.736577	0.229	0.1	5.53722e-09
Emb	3.27998e-13	0.865712	0.635	0.459	5.56317e-09
Mogat2	3.59553e-13	-0.351575	0.004	0.129	6.09837e-09
Prcp	3.66544e-13	-0.296814	0.041	0.206	6.21696e-09
Timm44	3.69781e-13	-0.307288	0.037	0.2	6.27186e-09
Prc1	3.73098e-13	-0.287438	0.207	0.393	6.32812e-09
Pdlim1	3.78809e-13	-0.355792	0.011	0.143	6.42499e-09
Hsd11b1	3.91149e-13	-0.26084	0.232	0.487	6.63428e-09
Myl12b	4.02402e-13	0.31365	0.934	0.989	6.82515e-09
Hpcal1	4.05303e-13	0.481843	0.266	0.409	6.87435e-09
Gp49a	4.05977e-13	0.633952	0.557	0.464	6.88577e-09
Phgdh	4.08685e-13	-0.570423	0.052	0.184	6.9317e-09
Nfkb1	4.20668e-13	-0.25763	0.059	0.252	7.13495e-09
Gtf3a	4.25179e-13	-0.272757	0.037	0.211	7.21146e-09
Scyl1	4.35813e-13	-0.265826	0.044	0.224	7.39182e-09
Tsc22d3	4.47842e-13	0.999933	0.391	0.413	7.59586e-09
Cst7	4.51071e-13	-0.524934	0.033	0.167	7.65061e-09
Nup107	4.54246e-13	-0.255475	0.03	0.189	7.70447e-09
Nbeal2	4.54722e-13	0.299894	0.31	0.33	7.71254e-09
Brms1	4.61814e-13	-0.375092	0.048	0.228	7.83284e-09
Etfdh	4.64313e-13	-0.281217	0.026	0.172	7.87521e-09
Syne1	4.72101e-13	-0.27072	0.797	0.933	8.0073e-09
Tgoln1	4.90522e-13	0.268863	0.14	0.246	8.31975e-09
Nlrp12	5.01011e-13	0.724111	0.214	0.068	8.49764e-09
Eif2d	5.01643e-13	-0.298786	0.011	0.143	8.50836e-09
Tubb2a	5.01813e-13	-0.436535	0.03	0.152	8.51125e-09
Hiatl1	5.24469e-13	0.424502	0.491	0.664	8.89552e-09
Prickle3	5.25002e-13	0.360102	0.48	0.598	8.90455e-09
Ppa2	5.90472e-13	-0.335191	0.033	0.195	1.0015e-08
Arhgap27	5.90904e-13	-0.285429	0.055	0.245	1.00223e-08
Lilrb3	6.08139e-13	0.693597	0.797	0.786	1.03146e-08
Htatip2	6.27869e-13	0.331045	0.103	0.211	1.06493e-08
Adam19	6.31006e-13	0.409892	0.38	0.255	1.07025e-08
Lpcat2	6.31229e-13	0.892334	0.513	0.404	1.07063e-08
Rfc3	7.02573e-13	-0.32143	0.018	0.149	1.19163e-08
Gm7609	7.19103e-13	0.296545	0.502	0.671	1.21967e-08
Ten1	7.53846e-13	-0.273511	0.007	0.141	1.2786e-08
Mrpl45	8.14584e-13	-0.285742	0.303	0.479	1.38162e-08
Mgst3	8.20714e-13	-0.345225	0.011	0.134	1.39201e-08
Ruvbl2	8.29697e-13	-0.305548	0.052	0.224	1.40725e-08
Siglece	8.45652e-13	0.65221	0.417	0.445	1.43431e-08
Dynlt1c	8.7825e-13	0.352343	0.277	0.46	1.4896e-08
Gins2	9.01001e-13	-0.257718	0.004	0.122	1.52819e-08
Ap1g2	9.08987e-13	-0.294266	0.018	0.155	1.54173e-08
Tnfrsf26	9.23656e-13	-0.272935	0.096	0.295	1.56661e-08
Hsd3b7	9.98381e-13	-0.399854	0.03	0.186	1.69335e-08
Wdr74	1.00777e-12	-0.301449	0.004	0.124	1.70927e-08
2010016I18Rik	1.02939e-12	0.647191	0.38	0.357	1.74595e-08
Nmd3	1.04265e-12	-0.255021	0.004	0.127	1.76844e-08
Cln5	1.08491e-12	0.292853	0.14	0.278	1.84012e-08
Map4k2	1.10788e-12	0.67173	0.458	0.505	1.87908e-08
Pdrg1	1.11901e-12	-0.384751	0.018	0.163	1.89795e-08
Tmem154	1.12797e-12	0.787939	0.428	0.387	1.91315e-08
St6galnac4	1.1739e-12	-0.314062	0.022	0.173	1.99105e-08
Ncf2	1.29732e-12	0.669079	0.624	0.704	2.20038e-08
Svil	1.38376e-12	0.306196	0.314	0.354	2.347e-08
Pilrb1	1.39477e-12	0.505784	0.472	0.575	2.36567e-08
Paqr7	1.4425e-12	-0.273674	0.041	0.213	2.44662e-08
Klra17	1.54958e-12	0.87521	0.218	0.057	2.62824e-08
1600014C10Rik	1.57197e-12	0.731859	0.421	0.48	2.66622e-08
Ppp6c	1.70972e-12	-0.301368	0.077	0.274	2.89986e-08
Marcks	1.73048e-12	0.34775	0.196	0.186	2.93507e-08
Plp2	1.73451e-12	0.360087	0.542	0.703	2.9419e-08
Cstf1	1.74182e-12	-0.256753	0.018	0.162	2.9543e-08
Prim2	1.81667e-12	-0.271477	0.018	0.147	3.08125e-08
Fah	1.83456e-12	-0.26706	0.007	0.13	3.11159e-08
Thoc6	1.86616e-12	-0.326633	0.018	0.162	3.16519e-08
Ccdc109b	1.91001e-12	-0.384352	0.022	0.139	3.23957e-08
Abtb2	1.92e-12	0.565246	0.17	0.076	3.25651e-08
Mtx2	2.01852e-12	-0.328809	0.022	0.164	3.42362e-08
Ctnnbl1	2.07644e-12	-0.281768	0.137	0.322	3.52184e-08
Cript	2.27638e-12	0.339759	0.155	0.289	3.86097e-08
Cd97	2.33092e-12	0.311398	0.399	0.641	3.95348e-08
Irf5	2.33168e-12	-0.43502	0.199	0.418	3.95476e-08
Il10ra	2.36342e-12	-0.490347	0.048	0.196	4.0086e-08
Dnase1l1	2.39704e-12	-0.346315	0.022	0.174	4.06562e-08
Prpsap1	2.71725e-12	-0.324911	0.066	0.248	4.60872e-08
Ikbkap	2.74937e-12	0.330686	0.288	0.238	4.66321e-08
Tsr3	3.00498e-12	-0.2679	0.011	0.133	5.09674e-08
Slc29a1	3.0704e-12	-0.565272	0.03	0.175	5.20771e-08
P2rx4	3.07139e-12	-0.250646	0.011	0.141	5.20938e-08
4930523C07Rik	3.21151e-12	0.282372	0.288	0.424	5.44704e-08
Vkorc1	3.29128e-12	-0.335385	0.007	0.127	5.58234e-08
Aldh3b1	3.2976e-12	0.353181	0.402	0.625	5.59305e-08
Gm5150	3.34927e-12	1.11724	0.347	0.194	5.6807e-08
Dmxl2	3.48191e-12	0.253831	0.284	0.234	5.90567e-08
Klrb1f	3.48248e-12	-0.264851	0.011	0.133	5.90664e-08
Hist1h2ap	3.68923e-12	-0.649673	0.162	0.384	6.25731e-08
4833439L19Rik	3.75964e-12	-0.250968	0.092	0.295	6.37672e-08
Jup	4.00789e-12	-0.293828	0.059	0.242	6.79779e-08
Fam53a	4.04258e-12	-0.278732	0.011	0.136	6.85661e-08
Msr1	4.14947e-12	-0.330353	0.03	0.16	7.03791e-08
Mrpl46	4.31495e-12	-0.280566	0.018	0.16	7.31858e-08
Aifm2	4.4633e-12	-0.263942	0.011	0.135	7.57021e-08
Dnajc14	4.74236e-12	0.264272	0.166	0.291	8.04352e-08
Bst1	4.92949e-12	0.763665	0.218	0.078	8.36092e-08
Myd88	5.08594e-12	0.272101	0.218	0.396	8.62626e-08
Dnpep	5.10795e-12	-0.314777	0.044	0.214	8.66359e-08
B4galt3	5.31216e-12	0.456388	0.188	0.292	9.00996e-08
Cd300lb	5.36775e-12	1.06822	0.557	0.378	9.10424e-08
Vps37c	5.42035e-12	0.377289	0.111	0.218	9.19345e-08
Lyst	5.54731e-12	0.342121	0.668	0.654	9.40879e-08
Osgin1	5.59755e-12	1.14393	0.273	0.151	9.49401e-08
Ldlrad3	5.90423e-12	-0.30217	0.037	0.194	1.00142e-07
Mrpl13	6.14599e-12	-0.29507	0.015	0.139	1.04242e-07
Pef1	6.24886e-12	0.354863	0.122	0.224	1.05987e-07
Pnpla2	6.54815e-12	0.398165	0.159	0.251	1.11063e-07
Ddx3x	6.58492e-12	0.267756	0.173	0.297	1.11687e-07
Slc7a7	6.87548e-12	-0.325701	0.085	0.281	1.16615e-07
Dcaf13	6.95297e-12	-0.276416	0.015	0.15	1.17929e-07
Ccni	7.03684e-12	0.311501	0.303	0.482	1.19352e-07
Rassf3	7.24716e-12	0.382975	0.196	0.172	1.22919e-07
Plbd2	7.30376e-12	-0.273765	0.03	0.173	1.23879e-07
Qdpr	7.61171e-12	-0.261517	0.004	0.117	1.29102e-07
Picalm	7.99187e-12	0.423753	0.336	0.378	1.3555e-07
Nr2c2ap	8.03654e-12	-0.283129	0.004	0.116	1.36308e-07
Pbxip1	8.26629e-12	0.585857	0.476	0.49	1.40205e-07
Il10rb	8.46768e-12	0.476085	0.225	0.371	1.4362e-07
Mlkl	8.56075e-12	-0.250969	0.018	0.151	1.45199e-07
Tspyl1	9.34523e-12	0.33562	0.351	0.514	1.58504e-07
Memo1	9.77155e-12	-0.279745	0.018	0.152	1.65735e-07
Clec4b2	1.00359e-11	-0.2651	0.007	0.132	1.70219e-07
A430005L14Rik	1.02837e-11	-0.295894	0.03	0.181	1.74423e-07
Ss18	1.03291e-11	-0.282504	0.066	0.233	1.75193e-07
Tmed5	1.09639e-11	-0.257039	0.351	0.513	1.85959e-07
Slc28a2	1.13194e-11	0.438767	0.137	0.223	1.91988e-07
Vmp1	1.17897e-11	0.385422	0.321	0.431	1.99965e-07
Ltb	1.18406e-11	0.985524	0.284	0.162	2.00828e-07
Immp1l	1.18486e-11	-0.262934	0.015	0.15	2.00964e-07
Tspan14	1.21158e-11	-0.322173	0.081	0.27	2.05496e-07
Nop16	1.22413e-11	-0.38362	0.114	0.259	2.07624e-07
Dohh	1.28553e-11	-0.329911	0.03	0.173	2.18038e-07
Anxa4	1.29149e-11	-0.285088	0.026	0.175	2.19049e-07
Mettl5	1.33574e-11	-0.25799	0.011	0.135	2.26556e-07
Map3k5	1.35383e-11	0.395328	0.358	0.319	2.29623e-07
Rsad2	1.44115e-11	0.8359	0.17	0.045	2.44434e-07
Was	1.451e-11	0.425002	0.524	0.68	2.46104e-07
Creg1	1.47867e-11	0.681216	0.458	0.524	2.50797e-07
Snhg3	1.48356e-11	-0.283248	0.015	0.15	2.51626e-07
Arl2	1.55284e-11	-0.292435	0.022	0.149	2.63377e-07
Arpc5	1.55847e-11	0.328217	0.808	0.945	2.64331e-07
Pstpip1	1.62802e-11	0.360141	0.314	0.497	2.76128e-07
Mgam	1.63593e-11	0.368181	0.218	0.158	2.77469e-07
Far1	1.76611e-11	0.291388	0.221	0.371	2.9955e-07
Tbc1d15	1.8025e-11	0.51265	0.225	0.276	3.05722e-07
Plaur	1.83912e-11	0.648074	0.76	0.782	3.11933e-07
Arpc2	1.85881e-11	0.253061	0.812	0.954	3.15273e-07
Mina	1.8694e-11	-0.250635	0.018	0.149	3.17069e-07
Tm2d1	1.88733e-11	-0.267106	0.055	0.229	3.20109e-07
Ext2	2.16862e-11	-0.259383	0.037	0.181	3.6782e-07
Hiat1	2.25202e-11	0.479507	0.288	0.337	3.81964e-07
Hfe	2.27926e-11	-0.468361	0.026	0.169	3.86586e-07
Rtfdc1	2.36324e-11	0.406432	0.255	0.382	4.00829e-07
Galnt9	2.57698e-11	-0.384926	0.011	0.122	4.37082e-07
Pop7	2.6754e-11	-0.290672	0.015	0.147	4.53775e-07
Dnajc5	2.71837e-11	0.409865	0.255	0.393	4.61062e-07
Mdp1	2.88427e-11	-0.291685	0.148	0.325	4.89201e-07
Rin3	3.07721e-11	0.362374	0.782	0.855	5.21925e-07
Gcnt1	3.15371e-11	0.443345	0.266	0.132	5.34901e-07
Ubc	3.16676e-11	0.36901	0.631	0.831	5.37115e-07
Hdc	3.1981e-11	0.875531	0.697	0.513	5.4243e-07
A130077B15Rik	3.35152e-11	0.299646	0.996	0.998	5.68452e-07
Cdc16	3.37395e-11	-0.256029	0.026	0.153	5.72256e-07
Rars	3.37943e-11	-0.260225	0.044	0.188	5.73185e-07
Cd82	3.40611e-11	0.838571	0.439	0.424	5.7771e-07
Rps27	3.54246e-11	-0.641197	0.055	0.224	6.00837e-07
Pros1	3.58667e-11	-0.271605	0.022	0.146	6.08335e-07
Tmem43	3.65823e-11	0.437287	0.207	0.367	6.20473e-07
Stard3nl	3.679e-11	-0.297264	0.033	0.185	6.23995e-07
Chaf1b	3.90739e-11	-0.273039	0.026	0.16	6.62733e-07
2310047M10Rik	3.99434e-11	0.393349	0.107	0.119	6.7748e-07
Ppa1	4.53273e-11	-0.271141	0.015	0.124	7.68797e-07
Gtf2b	4.56516e-11	-0.280594	0.022	0.162	7.74297e-07
Mrto4	4.6518e-11	-0.271695	0.041	0.194	7.88992e-07
Ngp	4.65187e-11	-1.93024	0.738	0.762	7.89004e-07
Cyth4	4.66181e-11	0.30438	0.384	0.582	7.9069e-07
Rnf141	4.69344e-11	0.2622	0.181	0.32	7.96054e-07
Dfna5	4.76721e-11	1.00261	0.236	0.201	8.08566e-07
Slc6a6	4.84075e-11	0.320074	0.328	0.442	8.21039e-07
A630089N07Rik	5.26852e-11	0.30542	0.97	0.973	8.93593e-07
Hmgn1	5.58786e-11	-0.301938	0.052	0.21	9.47758e-07
Cmip	5.58815e-11	0.419077	0.236	0.264	9.47805e-07
Alg5	6.1421e-11	-0.266881	0.037	0.188	1.04176e-06
Enoph1	6.14982e-11	-0.266537	0.022	0.135	1.04307e-06
Commd9	6.36539e-11	-0.279521	0.004	0.108	1.07963e-06
Jak1	6.46096e-11	0.428585	0.476	0.569	1.09584e-06
Psmg1	6.96507e-11	-0.322068	0.018	0.144	1.18134e-06
AA467197	7.22661e-11	-0.257479	0.044	0.189	1.22571e-06
Ginm1	7.34404e-11	0.27541	0.055	0.147	1.24562e-06
Relt	7.46429e-11	0.360827	0.155	0.273	1.26602e-06
Hspa1b	7.62209e-11	-0.543853	0.026	0.15	1.29278e-06
Fam50a	7.89751e-11	0.254255	0.085	0.214	1.3395e-06
Lgals3bp	7.99653e-11	-0.383301	0.041	0.194	1.35629e-06
Apip	8.12732e-11	-0.270152	0.026	0.164	1.37847e-06
Cd300e	9.45524e-11	-1.26876	0.026	0.118	1.6037e-06
Lbr	9.71804e-11	0.427106	0.893	0.931	1.64828e-06
Arpc1a	1.00074e-10	0.276046	0.173	0.342	1.69735e-06
Smim5	1.02228e-10	-0.309181	0.018	0.144	1.73388e-06
Ppih	1.04419e-10	-0.267743	0.173	0.298	1.77105e-06
Apobr	1.04836e-10	0.60002	0.339	0.364	1.77812e-06
Mrpl3	1.05044e-10	-0.252739	0.007	0.114	1.78166e-06
P2ry6	1.06563e-10	-0.414644	0.033	0.151	1.80741e-06
Ercc1	1.07196e-10	-0.275984	0.011	0.122	1.81815e-06
Igbp1	1.09472e-10	-0.307822	0.03	0.173	1.85676e-06
Rn45s	1.11586e-10	-0.270992	1	1	1.89261e-06
Susd3	1.13302e-10	-0.302938	0.122	0.315	1.92171e-06
Gtl3	1.14612e-10	-0.252143	0.026	0.156	1.94394e-06
Pycrl	1.17997e-10	-0.283649	0.011	0.121	2.00135e-06
Rftn1	1.18967e-10	-0.394932	0.022	0.152	2.01781e-06
Tmem97	1.24089e-10	-0.268057	0.011	0.116	2.10468e-06
Polb	1.28837e-10	-0.273851	0.048	0.207	2.18521e-06
Twf1	1.33169e-10	0.279933	0.137	0.258	2.25867e-06
Akr1b3	1.35812e-10	-0.277434	0.004	0.11	2.30351e-06
Ccrl2	1.3885e-10	1.1721	0.266	0.196	2.35503e-06
Cdc123	1.40781e-10	-0.338327	0.708	0.839	2.38779e-06
Oas3	1.43284e-10	0.834363	0.782	0.777	2.43024e-06
Wipi1	1.54106e-10	-0.311975	0.055	0.219	2.6138e-06
Tacstd2	1.58398e-10	0.677277	0.247	0.196	2.68659e-06
Srm	1.59088e-10	-0.361093	0.018	0.127	2.69829e-06
Lyn	1.71907e-10	0.406441	0.561	0.682	2.91572e-06
F10	1.7478e-10	-0.391859	0.546	0.593	2.96444e-06
Rnf115	1.75687e-10	0.322397	0.185	0.298	2.97982e-06
2019-03-07	1.80187e-10	0.423538	0.155	0.225	3.05615e-06
Ptprc	1.80873e-10	0.473445	0.937	0.943	3.06779e-06
Mrps35	1.81633e-10	-0.268491	0.015	0.136	3.08068e-06
4632428N05Rik	1.89805e-10	0.424655	0.69	0.794	3.21928e-06
Triobp	1.92704e-10	0.257431	0.317	0.498	3.26845e-06
Mcfd2	1.95808e-10	0.475906	0.107	0.2	3.32111e-06
Ccdc69	2.00308e-10	-0.328882	0.007	0.113	3.39743e-06
Pmm1	2.04305e-10	-0.270376	0.007	0.113	3.46522e-06
Cib2	2.07177e-10	0.265656	0.074	0.143	3.51393e-06
Csrnp1	2.07702e-10	0.530256	0.107	0.128	3.52283e-06
Osbpl2	2.11275e-10	0.304285	0.14	0.275	3.58344e-06
Cd53	2.2124e-10	0.443296	0.889	0.951	3.75245e-06
Pygl	2.30687e-10	0.742221	0.734	0.717	3.91268e-06
Il17ra	2.42122e-10	0.739815	0.664	0.646	4.10663e-06
Pde2a	2.4526e-10	0.385791	0.432	0.552	4.15985e-06
Tmem38a	2.54227e-10	0.617741	0.122	0.024	4.31194e-06
Myc	2.64156e-10	-0.253442	0.018	0.127	4.48035e-06
Sap25	2.69257e-10	0.418659	0.21	0.27	4.56687e-06
Zrsr1	2.7313e-10	0.311234	0.144	0.158	4.63256e-06
Gad1	3.08354e-10	0.499202	0.122	0.032	5.23e-06
S100a4	3.48506e-10	-0.301508	0.004	0.101	5.91101e-06
Dennd3	3.63337e-10	0.43629	0.284	0.135	6.16255e-06
Hmgcl	3.7313e-10	0.454938	0.159	0.291	6.32866e-06
Retsat	3.75231e-10	-0.253679	0.03	0.152	6.36429e-06
Hhex	3.75956e-10	0.401507	0.199	0.296	6.37658e-06
Atg7	3.82876e-10	0.2828	0.424	0.582	6.49396e-06
Slc25a1	3.85711e-10	-0.282453	0.033	0.173	6.54205e-06
Aqp9	3.96162e-10	0.484138	0.122	0.018	6.7193e-06
Cdc42ep3	4.03644e-10	0.262255	0.295	0.454	6.8462e-06
Pecam1	4.17571e-10	-0.318204	0.015	0.135	7.08243e-06
AW112010	4.2453e-10	-0.358388	0.011	0.111	7.20045e-06
Nfe2	4.25571e-10	0.580833	0.557	0.685	7.21811e-06
Fam58b	4.32479e-10	-0.307203	0.011	0.112	7.33527e-06
Pithd1	4.68785e-10	0.615477	0.125	0.179	7.95106e-06
Atf7ip	4.92056e-10	0.416597	0.328	0.453	8.34576e-06
Jagn1	4.99525e-10	-0.300663	0.018	0.121	8.47244e-06
Cyp27a1	5.01967e-10	-0.370441	0.007	0.106	8.51386e-06
Tmbim6	5.17058e-10	0.283302	0.827	0.952	8.76982e-06
Zfp511	5.41718e-10	-0.309214	0.018	0.143	9.18808e-06
Arl11	5.63901e-10	0.35204	0.118	0.229	9.56433e-06
Tmub2	5.74626e-10	0.318657	0.129	0.274	9.74624e-06
Jmjd6	6.10121e-10	-0.269484	0.033	0.173	1.03483e-05
Pfkfb4	6.43031e-10	0.807376	0.406	0.387	1.09064e-05
Tmem199	6.70511e-10	-0.285559	0.007	0.108	1.13725e-05
Nfkbiz	7.00008e-10	0.529265	0.594	0.588	1.18728e-05
Alg1	7.70541e-10	-0.283117	0.022	0.128	1.30691e-05
Gngt2	7.87885e-10	-0.687368	0.041	0.185	1.33633e-05
Rbm47	8.1214e-10	0.345027	0.31	0.334	1.37747e-05
Tmcc1	8.22896e-10	0.486356	0.45	0.313	1.39571e-05
Myo1f	8.45275e-10	0.310744	0.731	0.878	1.43367e-05
Pnkp	8.70915e-10	0.286183	0.469	0.629	1.47716e-05
Fbxo6	8.84242e-10	-0.331247	0.033	0.169	1.49976e-05
Ifitm1	8.91982e-10	1.32949	0.144	0.038	1.51289e-05
0610011F06Rik	9.01612e-10	-0.281032	0.007	0.106	1.52922e-05
BC100530	9.89798e-10	0.966647	0.192	0.097	1.6788e-05
Gramd1a	9.94418e-10	0.473528	0.166	0.22	1.68663e-05
Nmral1	9.95259e-10	-0.254448	0.022	0.116	1.68806e-05
Fgr	1.04828e-09	0.624235	0.723	0.663	1.77799e-05
Pqlc1	1.061e-09	0.711637	0.251	0.315	1.79956e-05
Eno3	1.09213e-09	-0.943293	0.015	0.107	1.85236e-05
Ppie	1.2223e-09	-0.255311	0.026	0.146	2.07314e-05
Ptpre	1.35538e-09	0.296362	0.594	0.714	2.29886e-05
Mical1	1.37577e-09	0.354435	0.188	0.318	2.33344e-05
Prkab1	1.42107e-09	0.491409	0.196	0.25	2.41028e-05
Tmem60	1.42797e-09	-0.296485	0.018	0.128	2.42198e-05
Rnf114	1.47896e-09	0.290126	0.295	0.465	2.50847e-05
Dusp6	1.57581e-09	0.788408	0.594	0.541	2.67273e-05
Fosl2	1.60436e-09	0.27249	0.487	0.421	2.72116e-05
Ppp1r3d	1.68552e-09	0.603836	0.148	0.089	2.85881e-05
Itgal	1.762e-09	0.407614	0.554	0.632	2.98853e-05
Cyb5r1	1.76918e-09	0.469613	0.229	0.296	3.00071e-05
Pltp	1.79501e-09	-0.709769	0.026	0.107	3.04452e-05
Mrps28	1.87534e-09	-0.252647	0.018	0.127	3.18077e-05
Man2b1	1.911e-09	0.275129	0.679	0.836	3.24125e-05
1110038B12Rik	2.09245e-09	-0.250361	0.015	0.125	3.54901e-05
Alox5	2.15379e-09	0.625523	0.59	0.554	3.65304e-05
Gde1	2.19106e-09	-0.273121	0.063	0.218	3.71625e-05
Trem2	2.19717e-09	-0.297714	0.011	0.102	3.72662e-05
Dguok	2.21147e-09	-0.285422	0.052	0.2	3.75087e-05
Atp6v0a1	2.40989e-09	0.391191	0.28	0.229	4.08742e-05
Calhm2	2.44355e-09	-0.293878	0.007	0.102	4.1445e-05
Csprs	2.49562e-09	0.370343	0.288	0.397	4.23281e-05
Gcnt2	3.02435e-09	0.662445	0.251	0.185	5.1296e-05
Rgs2	3.15678e-09	0.413218	0.299	0.339	5.35422e-05
Snrk	3.31313e-09	0.471954	0.255	0.27	5.6194e-05
Sun2	3.59507e-09	0.285452	0.616	0.745	6.09759e-05
Dusp22	3.66608e-09	-0.469122	0.273	0.358	6.21803e-05
Nedd9	3.70761e-09	0.429993	0.369	0.453	6.28848e-05
Ppil3	3.79315e-09	-0.272584	0.007	0.107	6.43357e-05
Snx27	4.01366e-09	0.445943	0.303	0.326	6.80757e-05
S1pr5	4.03572e-09	-0.569345	0.037	0.138	6.84498e-05
Tpm4	4.0524e-09	0.80127	0.583	0.514	6.87327e-05
[truncated: 281 more rows]

## Sheet: C1 FindMarkers
Supplementary Table 5F: FindMarkers output for C1
ID	p_val	avg_logFC	pct.1	pct.2	p_val_adj
Ltf	2.17116e-156	2.3121	0.988	0.562	3.68251e-152
Ngp	2.43301e-126	1.7749	1	0.68	4.12662e-122
Camp	1.85215e-122	1.50757	1	0.472	3.14143e-118
Lcn2	5.37594e-119	1.80989	0.992	0.518	9.11814e-115
Ly6f	1.08075e-106	0.64694	0.985	0.448	1.83306e-102
Ifitm6	3.12905e-106	1.67961	0.973	0.589	5.30718e-102
Ly6i	8.33714e-106	0.600513	0.985	0.499	1.41406e-101
Ly6a	3.42685e-105	0.81872	0.988	0.56	5.81228e-101
9030619P08Rik	1.26375e-104	0.633533	0.988	0.438	2.14344e-100
Anxa1	8.22651e-96	1.46062	0.996	0.851	1.3953e-91
Trp53inp2	1.46045e-93	1.40537	0.9	0.368	2.47707e-89
Adpgk	1.58855e-87	1.29623	0.981	0.536	2.69434e-83
Lrg1	6.22443e-80	1.13729	0.969	0.469	1.05573e-75
1100001G20Rik	7.23712e-78	1.28944	0.931	0.381	1.22749e-73
Plbd1	1.87701e-75	1.12455	0.988	0.706	3.1836e-71
Cd177	3.01714e-72	1.17701	0.992	0.839	5.11737e-68
Ccl6	3.56029e-65	-2.17739	0.246	0.772	6.03861e-61
Chi3l3	9.89714e-64	0.997263	0.965	0.576	1.67865e-59
BC049730	3.7298e-63	0.279714	0.958	0.547	6.32611e-59
St3gal5	7.9227e-63	1.20142	0.658	0.138	1.34377e-58
Srgn	2.40974e-62	-2.32955	0.227	0.715	4.08717e-58
Ptma	5.31695e-61	-1.93318	0.419	0.75	9.01808e-57
Padi4	1.80306e-59	0.991903	0.896	0.52	3.05817e-55
Ly6e	8.87464e-58	-1.40634	0.762	0.912	1.50523e-53
Dstn	3.87696e-57	0.979171	0.973	0.66	6.57572e-53
Ltb4r1	4.1878e-57	1.24598	0.846	0.442	7.10292e-53
Mmp9	6.97854e-57	0.861669	0.942	0.468	1.18363e-52
Pglyrp1	1.11325e-56	0.851446	0.996	0.767	1.88818e-52
S100a8	2.61397e-56	0.849347	1	0.809	4.43355e-52
S100a9	7.22699e-56	0.801117	1	0.774	1.22577e-51
Mrgpra2b	1.07922e-55	0.700205	0.95	0.484	1.83047e-51
Mrgpra2a	8.04059e-54	0.597072	0.965	0.522	1.36376e-49
Abca13	3.43216e-53	0.424084	0.762	0.276	5.82129e-49
Chi3l1	2.74075e-52	0.804181	0.988	0.742	4.64858e-48
Pld4	3.06016e-49	-2.10506	0.115	0.496	5.19033e-45
Mapk13	4.671e-49	1.02462	0.754	0.264	7.92249e-45
Tubb5	6.47685e-49	-1.62517	0.6	0.814	1.09854e-44
Gm2a	3.96775e-47	-1.46667	0.415	0.755	6.7297e-43
Sirpb1b	1.35828e-45	-1.38962	0.031	0.458	2.30378e-41
Ftl1	3.79476e-45	-0.849371	1	1	6.43629e-41
Rps28	1.27933e-44	-1.47304	0.392	0.665	2.16988e-40
Rpl3	1.50246e-44	-1.75218	0.419	0.733	2.54832e-40
Serpinb1a	1.61225e-44	0.76931	0.881	0.495	2.73455e-40
Ncf1	2.24354e-44	0.827846	0.946	0.725	3.80526e-40
Plaur	6.08618e-44	0.796599	0.969	0.716	1.03228e-39
Syne1	6.52264e-44	0.579409	0.962	0.88	1.1063e-39
Rps5	9.19235e-44	-1.78771	0.488	0.733	1.55912e-39
Rps2	9.796e-44	-1.67218	0.292	0.63	1.6615e-39
Hspa8	1.1752e-43	-1.66055	0.708	0.881	1.99325e-39
Hint1	2.22636e-42	-1.13017	0.035	0.43	3.77613e-38
Rps26	2.59703e-42	-1.53894	0.531	0.715	4.40482e-38
Ly6c2	2.17269e-41	-0.906394	0.977	0.626	3.6851e-37
Tuba1b	3.05174e-41	-1.93433	0.342	0.643	5.17605e-37
Rpl35	3.21982e-41	-1.47664	0.288	0.641	5.46114e-37
Csf1r	5.02142e-41	-1.67939	0.162	0.575	8.51682e-37
Ly6c1	3.70128e-40	-0.294528	0.977	0.603	6.27774e-36
Rpl18a	4.37973e-40	-1.2499	0.612	0.785	7.42845e-36
Rassf4	5.76292e-40	-0.493268	0.046	0.44	9.77449e-36
Cd24a	1.06543e-39	0.645417	0.965	0.656	1.80707e-35
LOC100038947	1.53404e-39	-1.43783	0.073	0.465	2.60188e-35
Rps4x	2.66084e-39	-1.54933	0.608	0.748	4.51304e-35
Rps29	3.35198e-39	-1.06019	0.519	0.684	5.68529e-35
Cybb	5.23334e-39	0.689266	0.981	0.828	8.87627e-35
Rps19	7.3482e-39	-1.33336	0.373	0.694	1.24633e-34
Mndal	9.07009e-39	-0.814134	0.031	0.398	1.53838e-34
Tifab	1.39224e-38	-0.6932	0.046	0.404	2.36137e-34
Rpl36a	1.85991e-38	-1.22871	0.104	0.504	3.1546e-34
Pla2g7	1.91732e-38	-1.90568	0.112	0.52	3.25197e-34
Ms4a6c	2.49001e-38	-1.65278	0.346	0.612	4.22331e-34
Rpl10a	3.27647e-38	-1.27626	0.138	0.513	5.55722e-34
Rps6	4.02894e-38	-1.33877	0.577	0.762	6.83349e-34
Rpl14	5.00912e-38	-1.22905	0.292	0.629	8.49596e-34
Rps11	9.44671e-38	-1.45961	0.354	0.678	1.60226e-33
Rps8	3.36339e-37	-1.4999	0.542	0.748	5.70465e-33
Mmp25	7.01797e-37	0.641744	0.735	0.296	1.19032e-32
Banf1	7.37151e-37	-1.08426	0.081	0.444	1.25028e-32
Rps23	1.45199e-36	-1.31977	0.377	0.653	2.46272e-32
Prdx5	4.48433e-36	0.636845	0.988	0.845	7.60588e-32
Sod1	5.73805e-36	-1.30782	0.185	0.561	9.73231e-32
Lgals1	6.89705e-36	-1.6836	0.065	0.429	1.16981e-31
Rps24	7.69837e-36	-1.15276	0.365	0.675	1.30572e-31
Ctsa	8.95266e-36	-1.23274	0.312	0.641	1.51846e-31
S100a10	9.27389e-36	-1.77131	0.038	0.352	1.57295e-31
Itgb2l	1.41725e-35	0.687555	0.55	0.148	2.4038e-31
Rpl39	1.7314e-35	-1.20937	0.119	0.501	2.93662e-31
Nme2	6.61738e-35	-0.963649	0.031	0.362	1.12237e-30
Zeb2	1.23696e-34	-0.291401	0.042	0.403	2.098e-30
Crip1	1.50846e-34	-1.724	0.062	0.386	2.55849e-30
Ctss	1.665e-34	-2.0057	0.185	0.51	2.82401e-30
Ifngr1	1.10035e-33	-1.25663	0.4	0.725	1.8663e-29
Cdkn1a	1.37249e-33	-1.02971	0.119	0.513	2.32788e-29
Erdr1	1.93637e-33	-0.580366	0.108	0.5	3.28428e-29
Rpl15	2.04814e-33	-0.953541	0.308	0.631	3.47385e-29
Gm20594	4.90322e-33	-0.588103	0.912	0.877	8.31635e-29
Set	5.06432e-33	-0.737941	0.2	0.561	8.58959e-29
Rpl28	5.17333e-33	-1.25879	0.431	0.66	8.77449e-29
Trem3	7.66955e-33	0.843696	0.823	0.48	1.30083e-28
Rpl6	7.92461e-33	-1.25739	0.558	0.75	1.34409e-28
Mgst1	1.62104e-32	0.576512	0.931	0.672	2.74945e-28
Rpl23	1.95432e-32	-0.859746	0.442	0.696	3.31472e-28
Rpl8	2.00708e-32	-1.32493	0.492	0.754	3.4042e-28
Ankrd22	2.06566e-32	0.71527	0.462	0.106	3.50357e-28
Rpl41	3.53392e-32	-1.27247	0.465	0.696	5.99388e-28
Fam105a	4.1316e-32	-0.647317	0.046	0.367	7.00761e-28
Eef1a1	4.5849e-32	-1.52025	0.65	0.812	7.77645e-28
Mpeg1	5.39699e-32	-1.09218	0.165	0.523	9.15384e-28
Hmgb1	5.52138e-32	-1.0054	0.635	0.757	9.36481e-28
Rps7	7.84587e-32	-1.07217	0.404	0.685	1.33074e-27
Fau	7.93087e-32	-0.811541	0.831	0.895	1.34515e-27
Rpl5	8.96919e-32	-1.01125	0.346	0.627	1.52126e-27
Ly86	9.27649e-32	-1.17057	0.031	0.322	1.57339e-27
Rpl10	9.61256e-32	-1.31875	0.715	0.804	1.63039e-27
Rpl13	1.22829e-31	-1.3873	0.512	0.737	2.08331e-27
Ppia	1.62069e-31	-1.39484	0.638	0.769	2.74886e-27
Rpl27a	1.68226e-31	-0.897332	0.238	0.575	2.85329e-27
Vmp1	1.7009e-31	-0.790596	0.115	0.494	2.8849e-27
Ahnak	1.74231e-31	-0.258986	0.035	0.361	2.95513e-27
Itgb7	1.82832e-31	-1.35497	0.077	0.391	3.10102e-27
Rpl17	2.76951e-31	-1.10489	0.531	0.739	4.69736e-27
Fxyd5	2.87865e-31	-1.09266	0.631	0.87	4.88248e-27
Rps17	3.56082e-31	-1.38467	0.331	0.621	6.03951e-27
Zmpste24	3.86053e-31	0.961865	0.569	0.272	6.54784e-27
Rpl35a	4.49017e-31	-1.07041	0.419	0.672	7.61579e-27
Arrb2	6.11649e-31	0.567199	0.931	0.653	1.03742e-26
2310005G13Rik	8.34109e-31	0.593998	0.327	0.055	1.41473e-26
Rpl4	8.3966e-31	-1.36712	0.458	0.72	1.42415e-26
Itgam	8.57481e-31	0.579704	0.954	0.774	1.45437e-26
Npm1	1.04444e-30	-1.05716	0.131	0.475	1.77147e-26
Mmp8	1.51254e-30	0.826505	0.804	0.501	2.56542e-26
Ran	1.7546e-30	-0.858612	0.173	0.528	2.97598e-26
Ctsc	1.98015e-30	-1.46754	0.127	0.438	3.35854e-26
Atp5g2	2.3317e-30	-0.975307	0.231	0.581	3.9548e-26
Pram1	3.75674e-30	0.518424	0.908	0.596	6.3718e-26
Sdf2l1	3.93812e-30	-1.10406	0.085	0.374	6.67945e-26
Glrx	4.23988e-30	0.559417	0.946	0.737	7.19126e-26
Eef1d	4.38079e-30	-0.674387	0.077	0.422	7.43027e-26
Clec4a3	4.51821e-30	-1.67653	0.05	0.353	7.66333e-26
Rpsa	4.57378e-30	-1.03253	0.242	0.579	7.75758e-26
Rps20	5.46968e-30	-1.12983	0.158	0.494	9.27712e-26
Gatm	5.90303e-30	-0.773336	0.146	0.492	1.00121e-25
Rpl21	7.44734e-30	-0.785233	0.338	0.625	1.26314e-25
Cks1b	7.59625e-30	-0.858206	0.035	0.32	1.2884e-25
Rpl38	8.83087e-30	-1.015	0.2	0.554	1.4978e-25
Gm15772	1.1654e-29	-1.16726	0.396	0.656	1.97664e-25
Churc1	1.23167e-29	-0.642456	0.969	0.988	2.08903e-25
Ms4a6b	1.26564e-29	-0.931532	0.038	0.349	2.14666e-25
Stmn1	1.31844e-29	-1.08523	0.104	0.436	2.2362e-25
Slc25a5	1.39485e-29	-1.27072	0.562	0.764	2.3658e-25
Eif4a1	1.61847e-29	-1.06551	0.438	0.679	2.74508e-25
Inhba	2.17929e-29	0.906039	0.427	0.106	3.6963e-25
Rps18	3.22163e-29	-1.37712	0.331	0.632	5.46421e-25
Dpysl2	3.27267e-29	-0.498523	0.073	0.386	5.55077e-25
Rpl32	3.80315e-29	-1.20011	0.265	0.59	6.45052e-25
Sepw1	5.2721e-29	-0.710681	0.042	0.361	8.94201e-25
Rpl13a	5.73415e-29	-0.938417	0.365	0.639	9.72569e-25
Pnkp	6.43144e-29	0.698085	0.823	0.516	1.09084e-24
Rpl22	1.0256e-28	-0.262692	0.073	0.411	1.73952e-24
Lims1	1.10679e-28	0.58633	0.881	0.638	1.87723e-24
Mettl9	1.58581e-28	0.660423	0.708	0.37	2.6897e-24
Ms4a4c	1.67306e-28	-1.00629	0.069	0.355	2.83767e-24
Rpl37	2.01133e-28	-0.785396	0.427	0.656	3.41141e-24
F13a1	2.22405e-28	-1.65428	0.146	0.433	3.77222e-24
Mcm6	2.29866e-28	-0.875869	0.081	0.374	3.89876e-24
Rplp1	3.82235e-28	-1.02006	0.119	0.463	6.48309e-24
Rps15a-ps6	3.8682e-28	-0.47941	0.331	0.608	6.56086e-24
Fos	4.21613e-28	-1.35107	0.304	0.638	7.15098e-24
Snrpd1	4.48368e-28	-0.735727	0.046	0.327	7.60477e-24
Vasp	4.95247e-28	0.369463	0.969	0.709	8.39989e-24
Hmga1-rs1	5.00892e-28	-0.562639	0.058	0.35	8.49562e-24
Cd3d	1.49307e-27	0.763055	0.515	0.249	2.5324e-23
Rps3a1	1.83842e-27	-1.12615	0.462	0.673	3.11815e-23
Ranbp1	2.00823e-27	-0.869814	0.073	0.392	3.40616e-23
Irf5	2.09873e-27	-1.21044	0.127	0.438	3.55966e-23
Nme1	2.28908e-27	-0.668311	0.069	0.339	3.88251e-23
B230208H11Rik	2.46422e-27	0.65059	0.704	0.581	4.17956e-23
Impdh2	3.41213e-27	-0.897298	0.073	0.365	5.78731e-23
Rpl36al	4.5251e-27	-0.860366	0.085	0.415	7.67503e-23
Cldn1	4.55952e-27	0.579018	0.365	0.095	7.7334e-23
Snd1	5.15344e-27	-0.397059	0.077	0.409	8.74075e-23
Cd68	5.60128e-27	-1.33297	0.127	0.462	9.50034e-23
Anxa3	5.99438e-27	0.679194	0.827	0.513	1.01671e-22
Ms4a6d	6.80722e-27	-1.08002	0.065	0.355	1.15457e-22
Cd33	6.81748e-27	0.366083	0.888	0.562	1.15631e-22
Rpl11	8.52959e-27	-1.1443	0.412	0.668	1.4467e-22
2810417H13Rik	1.29365e-26	-0.489679	0.154	0.452	2.19416e-22
Rrm2	1.36725e-26	-0.995405	0.081	0.362	2.319e-22
Rps15a-ps4	1.56912e-26	-0.403869	0.338	0.607	2.66139e-22
Rplp0	1.93811e-26	-1.31699	0.715	0.802	3.28723e-22
Sirpb1a	2.68796e-26	-0.860912	0.031	0.309	4.55905e-22
Top2a	2.7479e-26	-0.652728	0.104	0.41	4.66072e-22
Ctsz	3.56716e-26	-1.29634	0.362	0.662	6.05027e-22
Junb	3.60207e-26	-1.49622	0.369	0.685	6.10947e-22
Golim4	4.05025e-26	0.544337	0.562	0.252	6.86963e-22
Acer3	4.08403e-26	-0.343648	0.096	0.431	6.92692e-22
Pkmyt1	4.3148e-26	-0.425673	0.012	0.261	7.31833e-22
Smc6	4.77449e-26	-0.284133	0.081	0.406	8.09802e-22
R3hdm4	5.67024e-26	0.49893	0.95	0.799	9.61729e-22
Prdx1	7.18247e-26	-1.10959	0.196	0.53	1.21822e-21
Hist2h3b	8.33505e-26	-1.05065	0.042	0.314	1.41371e-21
Rps14	8.60598e-26	-1.03094	0.542	0.743	1.45966e-21
Irf8	1.10637e-25	-0.757264	0.085	0.34	1.87652e-21
Dusp1	1.12132e-25	-1.67066	0.527	0.79	1.90187e-21
Gnb2l1	1.32942e-25	-0.955798	0.162	0.495	2.25483e-21
Hp	1.4525e-25	0.386191	0.996	0.873	2.46358e-21
Ptges3	1.45695e-25	-0.560798	0.288	0.618	2.47113e-21
Uba52	1.71029e-25	-0.979117	0.588	0.73	2.90082e-21
Pcna	1.7342e-25	-0.697247	0.042	0.332	2.94137e-21
Erp29	1.74188e-25	-1.15902	0.219	0.512	2.9544e-21
Ccl9	1.8543e-25	-0.555759	0.227	0.516	3.14508e-21
Nudc	1.9941e-25	-0.749119	0.112	0.395	3.3822e-21
Rpl19	2.33875e-25	-1.1575	0.327	0.614	3.96675e-21
Fpr2	2.7532e-25	0.554647	0.454	0.13	4.6697e-21
Crispld2	2.96168e-25	0.552983	0.465	0.148	5.0233e-21
Erh	3.14816e-25	-0.785323	0.088	0.41	5.3396e-21
Ddost	3.29252e-25	-0.846214	0.188	0.507	5.58444e-21
Hmga1	3.44083e-25	-0.290228	0.008	0.255	5.83599e-21
Cdk4	3.9137e-25	-0.845776	0.092	0.386	6.63803e-21
Lyz1	4.52002e-25	0.450738	1	0.97	7.6664e-21
Tcp11l2	5.27048e-25	0.777904	0.562	0.274	8.93926e-21
Fkbp1a	6.8796e-25	-0.548387	0.023	0.263	1.16685e-20
Creg1	8.15157e-25	-1.06231	0.25	0.588	1.38259e-20
Gm8580	8.64604e-25	-0.355256	0.358	0.6	1.46646e-20
Cbx3	8.66195e-25	-0.812753	0.396	0.631	1.46915e-20
Rps13	8.91154e-25	-1.00455	0.477	0.681	1.51149e-20
Anp32e	1.04396e-24	-0.334789	0.073	0.382	1.77065e-20
Ehd4	1.07891e-24	-0.466214	0.069	0.374	1.82994e-20
Rpl29	1.09226e-24	-1.03837	0.423	0.645	1.85258e-20
AA467197	1.10137e-24	0.697727	0.365	0.087	1.86804e-20
Ssrp1	1.10494e-24	-0.513862	0.154	0.438	1.87408e-20
Dbi	1.16719e-24	-0.812052	0.092	0.41	1.97967e-20
Pdia6	1.46438e-24	-0.827606	0.096	0.391	2.48374e-20
A530032D15Rik	2.01532e-24	0.319437	0.804	0.543	3.41818e-20
Ilf3	2.29433e-24	-0.356275	0.073	0.362	3.89141e-20
Arhgdib	2.33233e-24	0.439256	0.992	0.964	3.95587e-20
Krtcap2	2.3532e-24	-0.834508	0.05	0.343	3.99127e-20
Dusp3	3.10666e-24	-0.426169	0.108	0.403	5.2692e-20
Gstp1	3.23117e-24	-1.01004	0.154	0.47	5.48039e-20
Ddx39b	3.49749e-24	-0.659679	0.15	0.48	5.93209e-20
Rpl18	3.57983e-24	-0.924038	0.235	0.558	6.07175e-20
9830166K06Rik	4.08428e-24	0.433373	0.369	0.09	6.92735e-20
Gm12191	4.20883e-24	-0.829147	0.135	0.466	7.13859e-20
Map3k1	9.30129e-24	-0.494395	0.369	0.656	1.57759e-19
Snrpb	9.6322e-24	-0.946402	0.215	0.546	1.63372e-19
G3bp1	9.92973e-24	-0.602376	0.142	0.463	1.68418e-19
Rpl22l1	1.18445e-23	-0.814485	0.123	0.434	2.00894e-19
Rpl34-ps1	1.2582e-23	-1.03605	0.196	0.511	2.13403e-19
Atp2b1	1.28309e-23	-0.296086	0.177	0.522	2.17625e-19
Hdc	1.31788e-23	0.442306	0.815	0.478	2.23526e-19
Slc31a2	1.41636e-23	0.782615	0.542	0.267	2.40228e-19
Fkbp4	1.41865e-23	-0.546129	0.038	0.299	2.40616e-19
Hist2h3c2	1.5148e-23	-0.62434	0.046	0.298	2.56926e-19
Eif3l	2.09039e-23	-0.634051	0.1	0.415	3.54551e-19
Rpl37a	2.47168e-23	-0.926198	0.423	0.669	4.19222e-19
Ly75	2.4946e-23	0.482497	0.492	0.188	4.23109e-19
Eef2	2.95119e-23	-1.15658	0.619	0.778	5.00552e-19
Rbbp7	3.01538e-23	-0.686359	0.1	0.376	5.11438e-19
Rpn2	3.01908e-23	-0.837037	0.185	0.483	5.12066e-19
Paics	3.17081e-23	-0.626969	0.081	0.353	5.37802e-19
Rps3	3.62724e-23	-0.728006	0.454	0.709	6.15217e-19
Gm5150	4.11662e-23	-1.08171	0.035	0.293	6.98219e-19
Arhgef10l	4.2526e-23	-0.52815	0.027	0.266	7.21283e-19
Nudt21	5.9602e-23	-0.632773	0.062	0.346	1.01091e-18
Dek	6.16901e-23	-0.542075	0.204	0.499	1.04633e-18
Snx5	6.71464e-23	-0.614798	0.077	0.359	1.13887e-18
Gstm1	7.54339e-23	-1.10499	0.096	0.35	1.27943e-18
Serbp1	7.57276e-23	-0.269036	0.238	0.556	1.28442e-18
1810033B17Rik	8.22159e-23	0.576322	0.827	0.543	1.39446e-18
Slc25a3	9.92159e-23	-0.946062	0.312	0.62	1.6828e-18
H2afx	9.92455e-23	-0.915552	0.119	0.381	1.6833e-18
Eef1g	1.04079e-22	-0.946105	0.2	0.487	1.76529e-18
Cdk1	1.07199e-22	-0.383301	0.054	0.281	1.8182e-18
Pygl	1.10727e-22	0.529275	0.888	0.669	1.87804e-18
Npm3	1.11e-22	-0.456458	0.019	0.25	1.88267e-18
Cdca3	1.11065e-22	-0.33352	0.027	0.284	1.88377e-18
C130026I21Rik	1.15712e-22	0.372507	0.788	0.522	1.96259e-18
Ivns1abp	1.27242e-22	-0.621236	0.115	0.401	2.15814e-18
Plxnb2	1.33425e-22	-0.454981	0.038	0.291	2.26302e-18
Snrpf	1.38331e-22	-0.380777	0.058	0.344	2.34624e-18
Pa2g4	1.3985e-22	-0.440457	0.038	0.291	2.372e-18
Rps16	1.41976e-22	-1.0211	0.323	0.601	2.40805e-18
Capn2	1.57925e-22	-0.593169	0.042	0.284	2.67856e-18
Npc2	1.71512e-22	-0.842266	0.35	0.601	2.90901e-18
Tkt	1.81749e-22	0.50625	0.969	0.822	3.08264e-18
Ccr2	2.07048e-22	-0.796985	0.219	0.462	3.51174e-18
Tnfrsf1b	2.30842e-22	-0.522675	0.062	0.321	3.91532e-18
Fn1	2.43891e-22	-0.67252	0.077	0.328	4.13664e-18
Rnaseh2b	2.46061e-22	-0.264442	0.008	0.231	4.17344e-18
Rrm1	3.06221e-22	-0.360911	0.073	0.322	5.19382e-18
Asf1b	3.11309e-22	-0.675406	0.058	0.327	5.28011e-18
Limd1	3.13516e-22	-0.28326	0.023	0.269	5.31754e-18
Rplp2	3.38097e-22	-0.854369	0.215	0.505	5.73447e-18
Tpt1	3.50323e-22	-0.758183	0.415	0.668	5.94183e-18
Cpne3	4.03831e-22	0.438969	0.615	0.343	6.84938e-18
Mt1	4.88964e-22	-0.941384	0.058	0.32	8.29331e-18
Mcm4	5.37761e-22	-0.435248	0.065	0.334	9.12096e-18
Cd55	5.85821e-22	0.509709	0.327	0.072	9.9361e-18
Fam101b	6.08702e-22	0.388798	0.738	0.397	1.03242e-17
Ifi30	6.2393e-22	-0.76213	0.038	0.256	1.05825e-17
Rpl12	6.90463e-22	-0.689856	0.065	0.339	1.17109e-17
Mcm7	6.96837e-22	-0.563612	0.085	0.327	1.18191e-17
Lrmp	7.00344e-22	0.622901	0.777	0.496	1.18785e-17
Itm2c	7.42268e-22	-0.679675	0.069	0.349	1.25896e-17
Clec4a1	7.46128e-22	-0.987609	0.077	0.335	1.26551e-17
Lyz2	9.74988e-22	0.476072	1	0.995	1.65368e-17
Kars	1.03879e-21	-0.480583	0.035	0.288	1.7619e-17
Emr1	1.16011e-21	-0.940134	0.042	0.29	1.96766e-17
Rps25	1.17729e-21	-0.878507	0.358	0.611	1.9968e-17
Hmgn1	1.18536e-21	-0.463364	0.008	0.221	2.0105e-17
Prdx2	1.33822e-21	-0.662486	0.015	0.22	2.26975e-17
Emilin2	1.56113e-21	-0.932997	0.177	0.474	2.64782e-17
1700047M11Rik	1.64053e-21	0.34967	0.358	0.09	2.78251e-17
Lta4h	1.67988e-21	0.544416	0.8	0.53	2.84924e-17
Thbs1	1.73451e-21	0.543533	0.438	0.144	2.9419e-17
Timm50	2.26779e-21	-0.529469	0.027	0.26	3.8464e-17
Ptp4a2	2.31431e-21	-0.841837	0.808	0.876	3.92531e-17
Dck	2.39261e-21	-0.792737	0.162	0.483	4.0581e-17
Gmnn	2.95859e-21	-0.497154	0.023	0.243	5.01807e-17
Tacc3	3.01047e-21	-0.519191	0.096	0.376	5.10607e-17
Hsp90b1	3.73824e-21	-0.908273	0.385	0.641	6.34043e-17
Psmb10	4.04793e-21	-0.635468	0.062	0.314	6.8657e-17
Gm5424	5.15241e-21	-0.734098	0.077	0.356	8.739e-17
Lat2	5.46864e-21	-0.799613	0.069	0.309	9.27536e-17
Rac2	5.5947e-21	0.348271	1	0.963	9.48918e-17
Snrpg	5.8053e-21	-0.612295	0.062	0.337	9.84637e-17
Nutf2-ps1	6.12593e-21	-0.572292	0.038	0.278	1.03902e-16
Kdelr2	6.1805e-21	-0.515108	0.327	0.601	1.04828e-16
Mif	6.69039e-21	-0.868162	0.035	0.272	1.13476e-16
Mcm3	7.63971e-21	-0.507695	0.062	0.292	1.29577e-16
Sri	7.66077e-21	0.492277	0.892	0.754	1.29934e-16
Ccna2	8.01791e-21	-0.580806	0.073	0.328	1.35992e-16
Amica1	8.07443e-21	-1.03803	0.027	0.261	1.3695e-16
Cd9	9.46639e-21	0.40556	0.792	0.476	1.60559e-16
Ahcy	9.622e-21	-0.462129	0.042	0.264	1.63199e-16
Spc24	1.03666e-20	-0.414378	0.927	0.968	1.75827e-16
Rpl7	1.30143e-20	-1.01243	0.562	0.726	2.20735e-16
Atp1a1	1.41939e-20	-0.459003	0.058	0.312	2.40743e-16
Fkbp2	1.5891e-20	-0.614029	0.081	0.364	2.69528e-16
Acvrl1	1.75162e-20	0.722006	0.3	0.099	2.97092e-16
Lin28a	1.75382e-20	0.288532	0.577	0.251	2.97465e-16
Emr4	2.19772e-20	-1.13227	0.042	0.268	3.72755e-16
Dnajc9	2.25499e-20	-0.50156	0.054	0.314	3.82468e-16
Lig1	2.27578e-20	-0.301595	0.062	0.309	3.85994e-16
Gm15987	2.4169e-20	-0.263081	0.008	0.214	4.09931e-16
Anp32b	2.5975e-20	-0.675266	0.173	0.477	4.40561e-16
Ddx5	2.65849e-20	-0.708738	0.942	0.966	4.50907e-16
Dut	2.7497e-20	-0.253683	0.031	0.244	4.66377e-16
Trex1	2.80706e-20	-1.13331	0.115	0.386	4.76106e-16
Tnfsf13	2.82479e-20	-0.418657	0.027	0.246	4.79112e-16
Rap2b	2.96686e-20	-0.260329	0.273	0.578	5.0321e-16
Fbl	3.03279e-20	-0.349118	0.008	0.213	5.14391e-16
Naca	3.03375e-20	-0.859872	0.438	0.638	5.14554e-16
Fen1	3.545e-20	-0.519826	0.042	0.262	6.01267e-16
Nusap1	3.82304e-20	-0.369288	0.035	0.268	6.48426e-16
Map4k1	4.01791e-20	-0.332979	0.065	0.334	6.81477e-16
Tipin	4.12029e-20	-0.608884	0.035	0.261	6.98842e-16
Hspa5	4.72063e-20	-1.0295	0.446	0.691	8.00666e-16
H2-D1	5.16302e-20	-0.856636	0.912	0.978	8.75699e-16
Ass1	5.18066e-20	-0.392683	0.027	0.26	8.78692e-16
Parp1	6.95107e-20	-0.277538	0.023	0.249	1.17897e-15
Eif3e	6.99262e-20	-0.449914	0.069	0.34	1.18602e-15
Rpl27	7.3835e-20	-0.758058	0.277	0.56	1.25232e-15
Scarb1	7.40974e-20	-0.65406	0.1	0.379	1.25677e-15
Supt16	8.2218e-20	-0.271079	0.108	0.393	1.3945e-15
Bax	9.77538e-20	-0.701315	0.092	0.362	1.658e-15
Hvcn1	1.01989e-19	0.697685	0.596	0.315	1.72984e-15
Trp53	1.10228e-19	-0.410069	0.027	0.252	1.86958e-15
Eif3i	1.15514e-19	-0.732709	0.073	0.317	1.95924e-15
Cytip	1.19828e-19	-0.506712	0.192	0.504	2.03241e-15
Rab3d	1.302e-19	0.539057	0.685	0.482	2.20832e-15
Lsm2	1.38265e-19	-0.39427	0.035	0.273	2.34511e-15
Sf3b5	1.3967e-19	-0.546622	0.077	0.35	2.36894e-15
Snrpa1	1.42716e-19	-0.472235	0.042	0.268	2.4206e-15
Fam49a	1.46824e-19	-0.373059	0.019	0.232	2.49029e-15
Rps15	1.54072e-19	-0.74379	0.154	0.447	2.61322e-15
Fh1	1.6597e-19	-0.517064	0.035	0.254	2.81502e-15
Atp1b3	1.74037e-19	-0.682847	0.158	0.459	2.95185e-15
Cx3cr1	1.80273e-19	-1.02031	0.212	0.44	3.05761e-15
Birc5	2.14929e-19	-0.707933	0.562	0.75	3.6454e-15
Dad1	2.24955e-19	-0.686675	0.165	0.464	3.81546e-15
Ssr4	2.33115e-19	-0.726324	0.135	0.413	3.95386e-15
Tm9sf4	2.66797e-19	-0.49089	0.254	0.556	4.52514e-15
Psma3	2.68669e-19	-0.531049	0.192	0.506	4.55689e-15
Ndufb6	2.84055e-19	-0.618123	0.038	0.278	4.81786e-15
Mtdh	2.90115e-19	-0.293273	0.169	0.472	4.92063e-15
Cebpe	3.01557e-19	0.64413	0.615	0.317	5.11471e-15
Prtn3	3.11098e-19	-2.08166	0.154	0.371	5.27653e-15
Clec5a	3.36107e-19	0.465242	0.754	0.464	5.70072e-15
Ndufa5	3.44318e-19	-0.370936	0.035	0.267	5.83998e-15
Sf3b3	3.49037e-19	-0.376825	0.054	0.281	5.92002e-15
Ddx39	3.85422e-19	-0.657996	0.104	0.364	6.53715e-15
Thoc7	3.97322e-19	-0.389628	0.038	0.275	6.73898e-15
Golt1b	4.00434e-19	-0.332976	0.096	0.364	6.79176e-15
Rnd3	4.26624e-19	-0.397871	0.035	0.249	7.23597e-15
C1qbp	4.4778e-19	-0.532121	0.019	0.225	7.59479e-15
Rrp1	4.74951e-19	-0.499296	0.085	0.357	8.05564e-15
Gpi1	5.47341e-19	0.378361	0.996	0.934	9.28346e-15
Flot2	5.85757e-19	0.699028	0.685	0.429	9.93503e-15
Hnrnpa1	5.96137e-19	-0.557017	0.023	0.242	1.01111e-14
Hist1h1b	6.72985e-19	-0.517393	0.012	0.21	1.14145e-14
Alox5	6.92817e-19	0.429036	0.785	0.494	1.17509e-14
Uhrf1	6.99642e-19	-0.412214	0.073	0.31	1.18666e-14
Clec7a	7.89103e-19	-1.05268	0.073	0.323	1.3384e-14
Nup85	8.41996e-19	-0.270179	0.027	0.25	1.42811e-14
Canx	8.69065e-19	-0.641349	0.319	0.582	1.47402e-14
Rpl26	8.78801e-19	-0.482816	0.108	0.389	1.49053e-14
Abcf1	1.00635e-18	-0.265195	0.05	0.296	1.70686e-14
Olfm4	1.01487e-18	2.02578	0.354	0.172	1.72132e-14
Cd300a	1.19078e-18	-0.706819	0.908	0.977	2.01967e-14
G0s2	1.19886e-18	0.438092	0.488	0.194	2.03338e-14
Rps27l	1.31305e-18	-0.689412	0.092	0.363	2.22707e-14
Gm6793	1.35417e-18	-0.735288	0.485	0.694	2.29681e-14
Lrpap1	1.44391e-18	-0.374103	0.065	0.32	2.44902e-14
Rexo2	1.4741e-18	-0.643826	0.069	0.317	2.50021e-14
Srsf7	1.5283e-18	-0.407647	0.115	0.391	2.59214e-14
H2-DMa	1.56886e-18	-0.675232	0.042	0.26	2.66094e-14
Lrrc33	1.74523e-18	-0.711879	0.312	0.582	2.96009e-14
Tcf19	1.80511e-18	-0.555485	0.035	0.234	3.06165e-14
Rpl31	1.84399e-18	-0.446064	0.165	0.418	3.12759e-14
Rpl24	1.96144e-18	-0.852251	0.381	0.626	3.3268e-14
Ptbp1	2.02117e-18	-0.493489	0.092	0.35	3.42811e-14
Slc25a4	2.05691e-18	-0.649304	0.042	0.261	3.48872e-14
Nubp1	2.07957e-18	-0.347899	0.027	0.246	3.52715e-14
Sephs2	2.17019e-18	-0.887164	0.596	0.828	3.68085e-14
Ndufa4	2.28089e-18	-0.702425	0.15	0.429	3.86862e-14
Cd244	2.43674e-18	-0.738849	0.038	0.239	4.13295e-14
Atf3	2.80186e-18	-0.80079	0.019	0.216	4.75223e-14
Dna2	2.97552e-18	-0.256458	0.027	0.243	5.04679e-14
Rps9	3.03737e-18	-0.645228	0.888	0.9	5.15168e-14
Idh2	3.08817e-18	-0.599156	0.046	0.266	5.23785e-14
Tmem14c	3.20231e-18	-0.350743	0.108	0.385	5.43144e-14
Dcps	3.45652e-18	-0.536089	0.054	0.268	5.8626e-14
Rbm3	3.64657e-18	-0.778727	0.427	0.623	6.18495e-14
Nap1l1	4.02735e-18	-0.618926	0.823	0.905	6.83078e-14
Eif4a3	4.29693e-18	-0.63724	0.119	0.385	7.28803e-14
Aurkb	4.48398e-18	-0.484064	0.046	0.27	7.60528e-14
Mrpl23	4.66951e-18	-0.593024	0.042	0.266	7.91995e-14
Atox1	4.71251e-18	-0.739678	0.115	0.389	7.99289e-14
BC035044	4.77804e-18	-0.364639	0.019	0.212	8.10403e-14
Nlrp3	4.99514e-18	-0.517646	0.069	0.31	8.47225e-14
Fpr1	5.0156e-18	0.292855	0.573	0.269	8.50696e-14
Pepd	5.53022e-18	-0.489576	0.023	0.23	9.3798e-14
Fgl2	5.57701e-18	-1.148	0.138	0.385	9.45917e-14
Psmb8	6.00673e-18	-0.813059	0.238	0.524	1.0188e-13
Spc25	6.35173e-18	-0.458256	0.023	0.233	1.07732e-13
Tmem109	6.98163e-18	-0.59781	0.023	0.225	1.18415e-13
Mlst8	7.55252e-18	0.586881	0.419	0.18	1.28098e-13
Cd48	7.67454e-18	-0.805741	0.1	0.367	1.30168e-13
Tmem147	7.94809e-18	-0.538532	0.015	0.209	1.34808e-13
2700094K13Rik	8.20235e-18	-0.5507	0.058	0.3	1.3912e-13
M6pr	8.71518e-18	-0.66461	0.192	0.45	1.47818e-13
Ptpro	9.018e-18	-0.324762	0.019	0.216	1.52954e-13
Ceacam10	9.13944e-18	0.471796	0.742	0.492	1.55014e-13
Snrpe	9.29987e-18	-0.624731	0.096	0.34	1.57735e-13
Nop10	1.13267e-17	-0.419907	0.023	0.231	1.92111e-13
Pmf1	1.31914e-17	-0.429555	0.054	0.285	2.23739e-13
Immt	1.33273e-17	-0.386437	0.05	0.285	2.26044e-13
Fbxo5	1.46954e-17	-0.311169	0.023	0.202	2.49248e-13
Mcm5	1.5109e-17	-0.498097	0.204	0.423	2.56263e-13
Cct4	1.56492e-17	-0.546131	0.146	0.424	2.65427e-13
Hnrnpr	1.69805e-17	-0.411831	0.112	0.37	2.88006e-13
Naga	1.74749e-17	-0.696134	0.077	0.316	2.96392e-13
Hist1h2bg	1.96248e-17	-0.428249	0.031	0.242	3.32855e-13
Trap1	2.08223e-17	-0.397363	0.046	0.25	3.53167e-13
Haus5	2.39381e-17	-0.303623	0.012	0.194	4.06014e-13
Cmtm3	2.75211e-17	-0.376004	0.023	0.227	4.66785e-13
Serinc3	2.81186e-17	-0.619261	0.55	0.712	4.7692e-13
Tgfbi	2.81401e-17	-1.03324	0.227	0.488	4.77285e-13
Psap	3.03791e-17	-1.29637	0.888	0.935	5.1526e-13
Pid1	3.23822e-17	-0.365606	0.058	0.278	5.49235e-13
Rnps1	3.31926e-17	-0.489342	0.073	0.321	5.62979e-13
Tcp1	3.47849e-17	-0.527251	0.104	0.334	5.89987e-13
Zfp706	3.50513e-17	-0.485454	0.377	0.614	5.94505e-13
Anapc5	3.55468e-17	-0.582526	0.208	0.486	6.0291e-13
Cd52	3.59171e-17	0.479843	0.869	0.71	6.0919e-13
Cdca8	3.66591e-17	-0.441858	0.077	0.327	6.21774e-13
Il1b	3.898e-17	-2.27564	0.065	0.246	6.61141e-13
Atpif1	3.97764e-17	-0.671884	0.177	0.453	6.74648e-13
Rpa1	4.00349e-17	-0.41644	0.065	0.263	6.79032e-13
Cst3	4.08971e-17	-1.34908	0.788	0.867	6.93655e-13
Prdx4	4.32259e-17	-0.506419	0.012	0.18	7.33155e-13
Kpna2	4.34387e-17	-1.00211	0.208	0.444	7.36764e-13
Rpl7a	4.50705e-17	-0.777702	0.331	0.553	7.64441e-13
Mrpl42	4.74291e-17	-0.675691	0.069	0.3	8.04445e-13
Phb	4.7558e-17	-0.460967	0.058	0.268	8.06632e-13
Gas5	4.78e-17	-0.250013	0.127	0.399	8.10735e-13
Acot7	5.50257e-17	-0.586964	0.035	0.243	9.3329e-13
F10	5.79133e-17	-0.393913	0.4	0.638	9.82267e-13
Racgap1	5.92481e-17	-0.352219	0.062	0.293	1.00491e-12
St8sia4	5.93499e-17	-0.372068	0.019	0.207	1.00663e-12
Susd3	5.94295e-17	-1.0146	0.081	0.326	1.00798e-12
Dnmt1	5.97621e-17	-0.262801	0.108	0.367	1.01362e-12
Cse1l	6.01195e-17	-0.259762	0.042	0.258	1.01969e-12
Eif2s2	6.26772e-17	-0.342676	0.196	0.474	1.06307e-12
Scpep1	6.30366e-17	-0.546422	0.046	0.25	1.06916e-12
Slc1a5	6.43297e-17	-0.362046	0.046	0.267	1.0911e-12
Vdac3	6.4975e-17	-0.628089	0.142	0.418	1.10204e-12
Nupr1	6.53146e-17	-0.750942	0.019	0.196	1.1078e-12
Ppp1r15a	6.54898e-17	-0.757878	0.027	0.22	1.11077e-12
Akr1a1	6.6808e-17	-0.859512	0.296	0.558	1.13313e-12
Gm11710	6.68594e-17	-0.512493	0.058	0.24	1.134e-12
Gm11711	6.68594e-17	-0.512493	0.058	0.24	1.134e-12
Ddrgk1	6.94386e-17	-0.423668	0.031	0.238	1.17775e-12
AI607873	7.12918e-17	-0.261596	0.027	0.232	1.20918e-12
Ahsa1	7.7181e-17	-0.435101	0.115	0.382	1.30907e-12
Tmem173	7.74169e-17	-0.366935	0.023	0.218	1.31307e-12
Hnrnpa2b1	7.87376e-17	-0.580522	0.692	0.767	1.33547e-12
Slco4c1	8.48336e-17	0.613632	0.462	0.204	1.43886e-12
Atp5a1	8.54843e-17	-0.756897	0.35	0.612	1.4499e-12
2410015M20Rik	8.97888e-17	-0.437294	0.035	0.248	1.52291e-12
Glipr2	9.13547e-17	0.605517	0.654	0.412	1.54947e-12
Xrn2	9.14269e-17	-0.307134	0.108	0.359	1.55069e-12
Mcm2	9.51827e-17	-0.38692	0.058	0.24	1.61439e-12
Rfc5	9.58239e-17	-0.388786	0.035	0.238	1.62527e-12
Srsf10	1.10657e-16	-0.272289	0.123	0.389	1.87685e-12
Itga4	1.12284e-16	-0.290558	0.504	0.73	1.90445e-12
Apobec1	1.14792e-16	-0.844818	0.119	0.355	1.94699e-12
Shisa5	1.25263e-16	-0.848041	0.319	0.612	2.12459e-12
Neil3	1.25809e-16	-0.250135	0.023	0.218	2.13384e-12
Srsf3	1.29043e-16	-0.600493	0.369	0.591	2.18869e-12
Cct8	1.29129e-16	-0.502223	0.119	0.383	2.19016e-12
H2-K1	1.30604e-16	-0.643292	0.392	0.65	2.21517e-12
Krt80	1.33043e-16	-0.520909	0.019	0.203	2.25654e-12
Cd300lh	1.34428e-16	-0.544262	0.008	0.177	2.28004e-12
Bccip	1.37678e-16	-0.379352	0.019	0.212	2.33516e-12
Rpa3	1.38025e-16	-0.317427	0.012	0.192	2.34104e-12
Cbx1	1.52493e-16	-0.289043	0.1	0.357	2.58644e-12
Pbk	1.58976e-16	-0.417059	0.019	0.192	2.6964e-12
Tmed9	1.61663e-16	-0.654003	0.154	0.428	2.74196e-12
Psmc4	1.95746e-16	-0.396333	0.112	0.362	3.32004e-12
Cat	2.04788e-16	-0.518437	0.108	0.365	3.4734e-12
Hat1	2.0485e-16	-0.430028	0.031	0.216	3.47446e-12
Rps21	2.0673e-16	-0.413277	0.062	0.287	3.50634e-12
Sec61g	2.13747e-16	-0.317246	0.115	0.377	3.62536e-12
Lgals3	2.2742e-16	0.268742	0.981	0.847	3.85727e-12
Mrps26	2.58428e-16	-0.452318	0.027	0.227	4.3832e-12
Rasa4	2.75716e-16	-0.419866	0.035	0.22	4.67642e-12
Tspan13	2.78157e-16	-0.77051	0.027	0.22	4.71782e-12
Dgat2	3.01373e-16	0.56393	0.527	0.264	5.11159e-12
Eif2s1	3.15644e-16	-0.300124	0.112	0.352	5.35363e-12
Pdia4	3.22521e-16	-0.575211	0.073	0.296	5.47028e-12
Calr	3.31175e-16	-0.662779	0.112	0.352	5.61705e-12
Gpx1	3.37933e-16	-0.65996	0.7	0.809	5.73168e-12
Polr2e	3.50417e-16	-0.794876	0.046	0.255	5.94343e-12
Nagpa	3.64498e-16	-0.529813	0.054	0.272	6.18225e-12
C3	3.73127e-16	0.472331	0.8	0.552	6.32861e-12
Ilf2	4.03492e-16	-0.34071	0.085	0.321	6.84362e-12
Etfa	4.28537e-16	-0.429941	0.135	0.401	7.26841e-12
Rfc4	4.3412e-16	-0.38936	0.023	0.188	7.36311e-12
Cpne2	4.39144e-16	0.52212	0.658	0.395	7.44832e-12
Ccrl2	4.47578e-16	-1.18828	0.058	0.262	7.59137e-12
Rpl9	4.72221e-16	-0.814332	0.608	0.75	8.00934e-12
Nhp2	4.84639e-16	-0.420969	0.019	0.203	8.21997e-12
Myadm	4.99256e-16	-0.885006	0.377	0.62	8.46788e-12
Eif3k	5.77617e-16	-0.651194	0.242	0.516	9.79697e-12
H2afy	6.42951e-16	-0.516856	0.412	0.571	1.09051e-11
Napsa	6.66392e-16	-0.717389	0.312	0.588	1.13027e-11
Daglb	6.77729e-16	-0.379625	0.1	0.346	1.1495e-11
Acat1	6.83671e-16	-0.280568	0.088	0.323	1.15957e-11
Tmem51	6.97906e-16	-0.770297	0.031	0.179	1.18372e-11
Elmo2	7.28457e-16	-0.588911	0.304	0.523	1.23554e-11
Lgmn	7.42887e-16	-0.747908	0.031	0.222	1.26001e-11
P4hb	7.91112e-16	-0.804387	0.462	0.655	1.3418e-11
Cln6	8.19851e-16	-0.373867	0.042	0.243	1.39055e-11
Gsn	8.26584e-16	0.547349	0.754	0.532	1.40197e-11
Mad2l1	8.86346e-16	-0.349986	0.058	0.279	1.50333e-11
Rasa3	9.26927e-16	-0.657962	0.192	0.445	1.57216e-11
Tubg1	9.54686e-16	-0.435721	0.035	0.195	1.61924e-11
Sae1	1.05311e-15	-0.455591	0.092	0.334	1.78617e-11
Tecr	1.05686e-15	0.394067	0.931	0.743	1.79254e-11
Ncaph2	1.06373e-15	-0.32389	0.104	0.352	1.80419e-11
Hn1	1.09018e-15	-0.734995	0.223	0.5	1.84905e-11
Slc2a6	1.11968e-15	-0.90253	0.073	0.293	1.8991e-11
Zfp36l2	1.19209e-15	-0.300651	0.25	0.534	2.02191e-11
Slirp	1.37897e-15	-0.416051	0.023	0.212	2.33887e-11
Stra13	1.42581e-15	-0.458378	0.081	0.317	2.41832e-11
Mgst2	1.55502e-15	0.497727	0.492	0.224	2.63747e-11
Msr1	1.60341e-15	-0.330065	0.008	0.165	2.71954e-11
Lrwd1	1.66931e-15	-0.520089	0.046	0.257	2.83132e-11
Tmpo	1.70804e-15	-0.293673	0.104	0.346	2.89701e-11
Ldlrad3	1.75828e-15	-0.325674	0.019	0.197	2.98222e-11
Blmh	1.93827e-15	-0.37146	0.042	0.237	3.28749e-11
Cnbp	2.00137e-15	-0.681551	0.281	0.552	3.39452e-11
Hist1h2bk	2.03283e-15	-0.2796	0.027	0.215	3.44788e-11
Trf	2.12625e-15	-1.47428	0.242	0.504	3.60633e-11
Dpy30	2.18566e-15	-0.352093	0.035	0.234	3.7071e-11
Lyrm4	2.2518e-15	-0.278532	0.042	0.245	3.81927e-11
Nans	2.28147e-15	-0.336045	0.073	0.298	3.8696e-11
Anxa11	2.32753e-15	0.25333	0.804	0.548	3.94773e-11
Bcap29	2.34095e-15	-0.258605	0.012	0.175	3.97049e-11
Plk1	2.43682e-15	-0.472404	0.065	0.268	4.13309e-11
Ninj1	2.44301e-15	-1.01967	0.077	0.309	4.14359e-11
Blvra	2.6225e-15	-0.364758	0.038	0.237	4.44803e-11
Hsp90aa1	2.90729e-15	-0.318914	0.165	0.404	4.93105e-11
Sptssa	2.95492e-15	-0.479123	0.112	0.361	5.01184e-11
Triobp	3.47088e-15	0.615282	0.612	0.404	5.88696e-11
Ncaph	3.48822e-15	-0.310488	0.058	0.23	5.91638e-11
Nono	3.86463e-15	-0.588362	0.238	0.512	6.55479e-11
Mrps15	4.66466e-15	-0.403672	0.081	0.312	7.91172e-11
Psat1	4.75836e-15	-0.315545	0.019	0.178	8.07065e-11
Ndufs7	4.96393e-15	-0.606138	0.119	0.369	8.41932e-11
Cct5	5.12948e-15	-0.59148	0.212	0.47	8.70011e-11
Incenp	5.14087e-15	-0.337584	0.104	0.333	8.71944e-11
1810022K09Rik	5.15649e-15	-0.299893	0.042	0.236	8.74593e-11
Ddx1	5.48265e-15	-0.336328	0.046	0.238	9.29912e-11
Elovl5	5.65717e-15	-0.409756	0.165	0.428	9.59513e-11
Cox7b	5.80724e-15	-0.315854	0.104	0.345	9.84966e-11
Plac8	6.48571e-15	-1.06923	0.431	0.597	1.10004e-10
Mrfap1	7.00334e-15	-0.625448	0.323	0.575	1.18784e-10
Prim1	7.14719e-15	-0.261313	0.023	0.181	1.21224e-10
Mrpl14	7.29646e-15	-0.285239	0.05	0.233	1.23755e-10
Fam96a	7.64836e-15	-0.488064	0.212	0.48	1.29724e-10
Reck	7.67926e-15	0.333906	0.262	0.087	1.30248e-10
Stom	8.08021e-15	-0.295469	0.081	0.31	1.37049e-10
Mtch2	8.18803e-15	-0.392913	0.108	0.335	1.38877e-10
Pdcd4	8.5779e-15	-0.371452	0.388	0.595	1.4549e-10
Mrpl28	8.59783e-15	-0.53374	0.073	0.296	1.45828e-10
Rps10	8.89079e-15	-0.687587	0.242	0.499	1.50797e-10
D17Wsu104e	9.88857e-15	-0.503222	0.038	0.236	1.6772e-10
Cst7	1.03756e-14	-0.520751	0.015	0.171	1.75981e-10
Nop56	1.10002e-14	-0.512958	0.085	0.258	1.86574e-10
Hmbs	1.11023e-14	-0.37451	0.031	0.202	1.88306e-10
Hypk	1.11709e-14	-0.423094	0.169	0.431	1.8947e-10
C1galt1c1	1.13188e-14	-0.601745	0.065	0.242	1.91979e-10
Ccnd3	1.16545e-14	0.38665	0.958	0.816	1.97672e-10
Mrpl4	1.20737e-14	-0.40694	0.062	0.274	2.04783e-10
Gltscr2	1.21375e-14	-0.647634	0.238	0.504	2.05865e-10
Tpd52	1.23399e-14	-0.772046	0.215	0.477	2.09296e-10
Exosc5	1.31645e-14	-0.397986	0.027	0.201	2.23283e-10
Smim14	1.34994e-14	0.467647	0.588	0.367	2.28963e-10
2700029M09Rik	1.35337e-14	-0.35557	0.077	0.302	2.29546e-10
Exosc8	1.42601e-14	-0.353729	0.077	0.254	2.41866e-10
Ppm1g	1.42836e-14	-0.475112	0.123	0.368	2.42264e-10
St13	1.43874e-14	-0.257905	0.073	0.293	2.44024e-10
Naa10	1.4429e-14	-0.375454	0.035	0.226	2.4473e-10
Tmem258	1.45857e-14	-0.514305	0.127	0.375	2.47388e-10
Acap1	1.47759e-14	0.473246	0.55	0.297	2.50615e-10
2700060E02Rik	1.66469e-14	-0.440144	0.096	0.323	2.82347e-10
Phgdh	1.72893e-14	-0.567651	0.031	0.189	2.93245e-10
Fam132a	1.73633e-14	0.749502	0.304	0.133	2.94498e-10
2010016I18Rik	1.74809e-14	0.321119	0.569	0.298	2.96493e-10
Cycs	1.80618e-14	-0.333563	0.423	0.654	3.06347e-10
Dleu2	1.85241e-14	-0.483108	0.281	0.542	3.14187e-10
Idh3a	1.93514e-14	-0.261438	0.035	0.215	3.28219e-10
Chsy1	1.99792e-14	-0.368089	0.177	0.424	3.38867e-10
Shmt2	2.18818e-14	-0.304026	0.027	0.208	3.71137e-10
Gps2	2.2044e-14	-0.538996	0.088	0.316	3.73889e-10
Smc4	2.2848e-14	-0.307037	0.204	0.423	3.87525e-10
Il13ra1	2.45762e-14	-0.383276	0.004	0.145	4.16837e-10
Rnase6	2.65983e-14	-0.628139	0.012	0.154	4.51134e-10
Cdt1	2.66579e-14	-0.339201	0.042	0.212	4.52144e-10
Nrm	2.68148e-14	-0.559715	0.05	0.238	4.54806e-10
Hsd17b12	2.88153e-14	-0.36421	0.035	0.202	4.88736e-10
Aamp	2.96138e-14	-0.649696	0.162	0.411	5.02279e-10
Tnfsf13b	3.01857e-14	0.403539	0.346	0.123	5.1198e-10
Nhp2l1	3.09655e-14	-0.389778	0.069	0.284	5.25207e-10
Snhg1	3.71405e-14	-0.347906	0.019	0.183	6.29941e-10
Hpse	3.7906e-14	-0.295376	0.027	0.196	6.42923e-10
Actl6a	3.95297e-14	-0.331513	0.031	0.21	6.70463e-10
Tk1	4.12068e-14	-0.421349	0.092	0.263	6.98909e-10
Eif4b	4.1743e-14	-0.259349	0.096	0.323	7.08002e-10
Rnh1	4.26544e-14	-0.576154	0.223	0.486	7.23461e-10
Pebp1	4.27713e-14	-0.588817	0.1	0.321	7.25445e-10
Mrps17	4.88927e-14	-0.292861	0.05	0.243	8.2927e-10
Elane	4.93703e-14	-3.43726	0.227	0.339	8.3737e-10
Oat	4.98722e-14	-0.339965	0.035	0.221	8.45882e-10
Gltp	5.01577e-14	-0.670016	0.204	0.457	8.50725e-10
Hspd1	5.12029e-14	-0.508191	0.1	0.299	8.68453e-10
C920025E04Rik	5.12566e-14	-0.25715	0.269	0.536	8.69364e-10
Wfdc17	5.30416e-14	-0.914026	0.012	0.16	8.99639e-10
Arl5c	5.35193e-14	-0.346726	0.004	0.142	9.0774e-10
Llph	5.42365e-14	-0.336922	0.096	0.314	9.19905e-10
Eif5a	5.44982e-14	-0.718275	0.65	0.761	9.24345e-10
Atp5g1	5.51008e-14	-0.547925	0.115	0.331	9.34564e-10
Klf10	5.74888e-14	-0.349262	0.1	0.331	9.75068e-10
Bola2	6.1061e-14	-0.353725	0.031	0.212	1.03566e-09
Aldh9a1	6.12263e-14	-0.425219	0.115	0.344	1.03846e-09
Stub1	6.3511e-14	-0.509953	0.154	0.397	1.07721e-09
Psma7	7.36168e-14	-0.694207	0.338	0.596	1.24861e-09
Psmc3	7.37153e-14	-0.413206	0.177	0.433	1.25028e-09
Pes1	7.38238e-14	-0.292514	0.046	0.242	1.25213e-09
Tspan31	7.66839e-14	-0.416544	0.104	0.302	1.30064e-09
Eif3g	8.0488e-14	-0.675848	0.142	0.356	1.36516e-09
Hn1l	8.25477e-14	-0.289297	0.062	0.263	1.40009e-09
Akip1	8.45293e-14	-0.266383	0.004	0.139	1.4337e-09
Snrpd2	8.74606e-14	-0.44776	0.05	0.245	1.48342e-09
Mrps24	9.18169e-14	-0.376687	0.123	0.358	1.55731e-09
Hadh	9.50018e-14	-0.306464	0.019	0.163	1.61133e-09
Hspa9	9.63164e-14	-0.377973	0.069	0.254	1.63362e-09
Slc27a4	9.73888e-14	0.279618	0.419	0.177	1.65181e-09
Ceacam1	9.98119e-14	0.299313	0.838	0.613	1.69291e-09
Lsm4	1.06322e-13	-0.337769	0.092	0.308	1.80333e-09
Plp2	1.10001e-13	0.475832	0.819	0.614	1.86573e-09
Bub3	1.19498e-13	-0.526337	0.177	0.412	2.0268e-09
Gp49a	1.21072e-13	0.328589	0.688	0.424	2.0535e-09
Txndc5	1.23431e-13	-0.424851	0.023	0.179	2.09351e-09
Sun2	1.23778e-13	0.298254	0.881	0.661	2.09941e-09
Plscr1	1.28367e-13	0.499844	0.462	0.225	2.17723e-09
Lmnb1	1.28842e-13	-0.49835	0.331	0.524	2.18529e-09
Ctsg	1.33383e-13	-1.85533	0.081	0.246	2.2623e-09
C330006A16Rik	1.36018e-13	-0.439044	0.238	0.487	2.30701e-09
Swi5	1.36194e-13	-0.56036	0.169	0.417	2.30999e-09
Kif20a	1.51641e-13	-0.314289	0.065	0.267	2.57199e-09
Dctpp1	1.5296e-13	-0.341387	0.012	0.163	2.59436e-09
Htra2	1.53465e-13	-0.399112	0.119	0.353	2.60293e-09
Slc43a3	1.65421e-13	-0.305678	0.065	0.252	2.8057e-09
Dnajc19	1.67463e-13	-0.32407	0.062	0.258	2.84034e-09
Cdc45	1.68269e-13	-0.28912	0.042	0.231	2.85401e-09
Xpnpep1	1.78417e-13	-0.323171	0.062	0.264	3.02613e-09
Gpr114	1.8632e-13	-0.418597	0.031	0.197	3.16017e-09
Adtrp	1.87833e-13	0.266423	0.215	0.089	3.18583e-09
Smg9	1.92714e-13	0.34622	0.327	0.168	3.26862e-09
Hist1h2bc	2.00133e-13	-0.499244	0.035	0.213	3.39446e-09
Lsm3	2.04305e-13	-0.423529	0.035	0.215	3.46522e-09
Ndufa2	2.1674e-13	-0.403984	0.192	0.44	3.67614e-09
Idh3g	2.17407e-13	-0.579642	0.142	0.383	3.68743e-09
H2afv	2.19931e-13	-0.347273	0.2	0.452	3.73026e-09
Ssr2	2.22342e-13	-0.568904	0.135	0.35	3.77115e-09
Osgep	2.32997e-13	-0.306893	0.019	0.173	3.95187e-09
Uqcr11	2.35355e-13	-0.363686	0.104	0.326	3.99186e-09
Ceacam2	2.41779e-13	0.278723	0.819	0.593	4.10082e-09
Sec11a	2.42738e-13	-0.492338	0.135	0.373	4.11708e-09
Ppm1h	2.54341e-13	-0.257402	0.25	0.511	4.31387e-09
Cops6	2.54483e-13	-0.500512	0.158	0.399	4.31629e-09
Malat1	2.56588e-13	-0.619601	0.996	0.999	4.35198e-09
Calm2	2.61746e-13	-0.758703	0.415	0.642	4.43948e-09
Pycard	2.74754e-13	-0.412134	0.158	0.4	4.66011e-09
Cdc20	2.75298e-13	-0.293165	0.077	0.287	4.66932e-09
Clec4a2	2.76179e-13	0.441665	0.746	0.611	4.68427e-09
Cct7	2.7706e-13	-0.441428	0.169	0.416	4.69922e-09
Pold2	2.87378e-13	-0.346443	0.023	0.159	4.87423e-09
Ace	2.91746e-13	-0.530097	0.019	0.162	4.9483e-09
Lamp1	2.9908e-13	-0.696801	0.331	0.576	5.0727e-09
Gusb	3.01543e-13	-0.29594	0.138	0.375	5.11447e-09
Rgs2	3.02954e-13	-0.447243	0.154	0.383	5.13841e-09
Lman2	3.04666e-13	-0.460235	0.254	0.501	5.16743e-09
Gngt2	3.2025e-13	-0.746242	0.023	0.189	5.43175e-09
Ndufc2	3.28083e-13	-0.3522	0.073	0.28	5.56461e-09
Ccdc101	3.31445e-13	-0.343932	0.015	0.157	5.62164e-09
Hnrpdl	3.36779e-13	-0.356417	0.212	0.462	5.71212e-09
Atp5o	3.4697e-13	-0.614207	0.204	0.451	5.88495e-09
Ccs	3.54259e-13	-0.340588	0.008	0.143	6.00858e-09
Psma4	3.74985e-13	-0.500821	0.104	0.327	6.36012e-09
Polr2m	3.7867e-13	-0.414506	0.092	0.306	6.42261e-09
Dok1	3.79527e-13	-0.453077	0.058	0.255	6.43716e-09
Pigt	3.87579e-13	-0.471765	0.138	0.365	6.57372e-09
Timm23	4.04048e-13	-0.553318	0.131	0.359	6.85306e-09
Dnajb11	4.21752e-13	-0.391677	0.223	0.464	7.15333e-09
Snrpa	4.50906e-13	-0.419768	0.073	0.268	7.64782e-09
AI662270	4.59776e-13	-0.317589	0.15	0.389	7.79826e-09
Pdia3	4.63478e-13	-0.650232	0.385	0.579	7.86104e-09
Cetn3	4.73437e-13	-0.398591	0.104	0.326	8.02996e-09
H2-T23	5.03304e-13	-0.40747	0.892	0.953	8.53654e-09
Siva1	5.37227e-13	-0.528952	0.108	0.329	9.11191e-09
Slbp	5.70098e-13	-0.596876	0.177	0.386	9.66944e-09
Bckdha	5.79862e-13	-0.426917	0.015	0.163	9.83504e-09
Bst2	5.90505e-13	-0.499253	0.031	0.202	1.00155e-08
Ccnf	6.32095e-13	-0.271357	0.042	0.212	1.0721e-08
Rangap1	6.36175e-13	-0.315627	0.269	0.47	1.07902e-08
Dtymk	6.7799e-13	-0.440138	0.108	0.328	1.14994e-08
Naa40	7.03687e-13	-0.258497	0.046	0.212	1.19352e-08
Rbmxl1	7.12918e-13	-0.388401	0.069	0.246	1.20918e-08
Ccl3	7.25749e-13	-0.760238	0.015	0.163	1.23094e-08
Tmem43	7.34191e-13	-0.31618	0.154	0.381	1.24526e-08
Hist1h2ao	7.4623e-13	-1.09107	0.369	0.476	1.26568e-08
Psmb5	7.66518e-13	-0.617347	0.104	0.319	1.30009e-08
Rbm7	7.67349e-13	-0.477312	0.177	0.422	1.3015e-08
Cisd1	7.69328e-13	-0.300371	0.008	0.147	1.30486e-08
Rpl23a	7.98897e-13	-0.662557	0.281	0.486	1.35501e-08
Il10ra	8.1573e-13	-0.477979	0.035	0.198	1.38356e-08
Hnrnpc	8.76894e-13	-0.471673	0.377	0.627	1.4873e-08
Ndufs3	8.93512e-13	-0.327154	0.05	0.236	1.51549e-08
Fkbp3	9.00875e-13	-0.321813	0.054	0.238	1.52797e-08
Rogdi	9.13178e-13	0.457737	0.65	0.4	1.54884e-08
Myl6	9.41756e-13	0.353253	0.962	0.835	1.59731e-08
Ndufa6	9.52184e-13	-0.444628	0.246	0.502	1.615e-08
Ost4	1.02607e-12	-0.55201	0.188	0.431	1.74032e-08
4632428N05Rik	1.13171e-12	0.361042	0.854	0.742	1.9195e-08
Pros1	1.14745e-12	-0.268953	0.012	0.148	1.94619e-08
Cd180	1.17313e-12	-0.299928	0.015	0.156	1.98975e-08
Haus4	1.18436e-12	-0.327902	0.027	0.154	2.00879e-08
Ywhaq	1.20455e-12	-0.413583	0.262	0.518	2.04303e-08
Cct3	1.23599e-12	-0.438485	0.073	0.215	2.09636e-08
Gars	1.25411e-12	-0.300343	0.065	0.26	2.12709e-08
Mpv17	1.25605e-12	-0.359885	0.962	0.988	2.13039e-08
Anxa6	1.31824e-12	-0.615025	0.169	0.399	2.23587e-08
Snrnp25	1.32323e-12	-0.360359	0.019	0.174	2.24433e-08
Nr4a1	1.32985e-12	-1.7043	0.208	0.395	2.25556e-08
Rbck1	1.33037e-12	-0.406269	0.158	0.394	2.25644e-08
P2ry6	1.39612e-12	-0.44874	0.015	0.155	2.36795e-08
Hprt	1.39843e-12	-0.317869	0.1	0.315	2.37188e-08
Tinagl1	1.40462e-12	0.478728	0.273	0.085	2.38237e-08
Cdca5	1.42824e-12	-0.262866	0.015	0.145	2.42244e-08
Pdcd5	1.47245e-12	-0.404991	0.077	0.28	2.49742e-08
Clta	1.49575e-12	-0.630222	0.327	0.571	2.53694e-08
Gorasp2	1.52473e-12	-0.385886	0.15	0.379	2.58609e-08
Farsa	1.61323e-12	-0.417942	0.035	0.202	2.73621e-08
Pdlim1	1.63381e-12	-0.352013	0.012	0.141	2.7711e-08
Mafb	1.71449e-12	-0.293919	0.019	0.163	2.90794e-08
Rqcd1	1.75042e-12	-0.306924	0.104	0.309	2.9689e-08
Cd302	1.79223e-12	-0.396898	0.038	0.195	3.0398e-08
Luc7l	1.84635e-12	-0.255447	0.162	0.398	3.13159e-08
Ppib	1.89789e-12	-0.649331	0.3	0.529	3.21901e-08
Snrpd3	1.90677e-12	-0.4842	0.158	0.385	3.23407e-08
Stt3a	1.99389e-12	-0.433499	0.177	0.415	3.38183e-08
Ccdc109b	2.18881e-12	-0.380548	0.015	0.139	3.71244e-08
Arhgdia	2.24317e-12	-0.608869	0.519	0.701	3.80463e-08
Rgs10	2.34227e-12	-0.430239	0.023	0.18	3.97272e-08
Dhrs7	2.37796e-12	0.365427	0.7	0.474	4.03325e-08
Mrps33	2.41278e-12	-0.35962	0.088	0.294	4.09232e-08
Mrps28	2.43569e-12	-0.264453	0.004	0.13	4.13118e-08
Rhno1	2.45599e-12	-0.315191	0.073	0.272	4.1656e-08
Nt5c	2.59525e-12	-0.359478	0.065	0.257	4.4018e-08
Atp5l	2.62846e-12	-0.561451	0.219	0.465	4.45813e-08
Rsl1d1	2.68164e-12	-0.294521	0.035	0.188	4.54833e-08
Ppif	2.68959e-12	-0.320022	0.004	0.125	4.56182e-08
Mrpl36	2.6997e-12	-0.41294	0.054	0.236	4.57896e-08
Uqcrc1	2.81531e-12	-0.691705	0.3	0.53	4.77505e-08
Polr2f	2.86955e-12	-0.305285	0.019	0.171	4.86705e-08
Aplp2	2.88485e-12	-0.313055	0.05	0.227	4.893e-08
Tra2b	2.8897e-12	-0.408405	0.442	0.618	4.90122e-08
Fcgrt	2.89436e-12	-0.621477	0.008	0.139	4.90913e-08
Mat2a	2.93246e-12	-0.409893	0.104	0.312	4.97375e-08
Xdh	2.93267e-12	0.418639	0.754	0.56	4.9741e-08
0610007P14Rik	2.94377e-12	-0.30889	0.031	0.194	4.99293e-08
Fam98c	3.06409e-12	-0.316225	0.019	0.171	5.197e-08
1500032L24Rik	3.13144e-12	-0.583202	0.181	0.411	5.31124e-08
Yif1b	3.2707e-12	-0.430209	0.05	0.224	5.54743e-08
Tifa	3.27224e-12	-0.282913	0.038	0.209	5.55005e-08
Thoc6	3.32482e-12	-0.334023	0.015	0.161	5.63923e-08
Pgd	3.42822e-12	0.297768	0.888	0.722	5.8146e-08
Rfc3	3.42845e-12	-0.317673	0.019	0.147	5.815e-08
A430005L14Rik	3.51754e-12	-0.329638	0.027	0.18	5.96611e-08
Itpripl1	3.56488e-12	-0.312571	0.2	0.417	6.0464e-08
Mdh1	3.5683e-12	-0.387823	0.135	0.355	6.0522e-08
Csde1	3.69973e-12	-0.439436	0.531	0.697	6.27511e-08
Cox7c	3.77433e-12	-0.442225	0.215	0.457	6.40164e-08
Rrp7a	3.93991e-12	-0.410623	0.062	0.24	6.68249e-08
Ikbkb	3.95779e-12	-0.371032	0.181	0.418	6.71281e-08
Nup62	3.9929e-12	-0.305224	0.038	0.204	6.77236e-08
Ppie	4.2049e-12	-0.295132	0.012	0.149	7.13194e-08
Smim11	4.29244e-12	-0.256753	0.042	0.2	7.28041e-08
Faim	4.30026e-12	-0.360284	0.027	0.184	7.29367e-08
Got1	4.35122e-12	0.384753	0.204	0.135	7.3801e-08
Dgat1	4.36938e-12	0.561475	0.415	0.214	7.4109e-08
Gins2	4.48044e-12	-0.254389	0.004	0.12	7.59928e-08
Arhgap17	4.75867e-12	-0.304939	0.112	0.319	8.07118e-08
Bmx	4.80742e-12	0.306402	0.5	0.257	8.15387e-08
Flot1	5.22919e-12	0.556726	0.492	0.314	8.86923e-08
Fam69a	5.39044e-12	-0.283812	0.038	0.201	9.14272e-08
Aarsd1	5.49907e-12	-0.395111	0.042	0.201	9.32696e-08
Sf3a3	5.53282e-12	-0.31365	0.058	0.236	9.38422e-08
2010107E04Rik	5.53696e-12	-0.485659	0.146	0.373	9.39123e-08
Park7	5.54628e-12	-0.603552	0.2	0.423	9.40705e-08
Wipi1	5.59798e-12	0.561659	0.319	0.135	9.49473e-08
Gca	5.61537e-12	0.327136	0.438	0.213	9.52423e-08
Mfsd1	5.82767e-12	-0.351093	0.154	0.375	9.88431e-08
Lsm7	5.88099e-12	-0.391848	0.015	0.159	9.97475e-08
Nudt5	5.90082e-12	-0.272883	0.042	0.192	1.00084e-07
Mrpl52	6.47444e-12	-0.25118	0.008	0.129	1.09813e-07
Ldha	6.80726e-12	0.403862	0.877	0.714	1.15458e-07
Eif3f	7.06519e-12	-0.643887	0.462	0.654	1.19833e-07
Btg1	7.07675e-12	-0.778716	0.658	0.79	1.20029e-07
Arhgef39	7.08785e-12	-0.25775	0.027	0.183	1.20217e-07
Nptn	7.25625e-12	-0.366985	0.127	0.345	1.23073e-07
Rpa2	7.35011e-12	-0.279538	0.035	0.197	1.24665e-07
3110001D03Rik	7.40384e-12	-0.253722	0.035	0.194	1.25576e-07
Slc29a1	7.4342e-12	-0.539636	0.027	0.174	1.26092e-07
Mrpl12	7.49067e-12	-0.373814	0.027	0.174	1.27049e-07
Pot1b	7.79501e-12	-0.250807	0.669	0.791	1.32211e-07
Pycrl	7.9131e-12	-0.280905	0.004	0.121	1.34214e-07
Tagln2	8.05485e-12	-0.70621	0.338	0.505	1.36618e-07
Nedd8	8.17546e-12	-0.56503	0.238	0.478	1.38664e-07
Treml4	8.18123e-12	-1.35031	0.065	0.213	1.38762e-07
Dohh	8.2597e-12	-0.389915	0.027	0.172	1.40093e-07
Mfsd10	8.36228e-12	-0.424464	0.112	0.317	1.41833e-07
Nmral1	8.8445e-12	-0.252901	0.004	0.12	1.50012e-07
Eif2a	8.9215e-12	-0.263944	0.035	0.192	1.51318e-07
Sarnp	8.95754e-12	-0.503813	0.196	0.422	1.51929e-07
Gapdh	8.98837e-12	0.273836	0.981	0.911	1.52452e-07
Kif23	9.11842e-12	-0.254996	0.096	0.3	1.54658e-07
Wbscr22	9.13815e-12	-0.33968	0.027	0.18	1.54992e-07
Tmx2	9.2553e-12	-0.364461	0.073	0.249	1.56979e-07
Rpp21	9.42099e-12	-0.340504	0.1	0.288	1.59789e-07
Rpl36	1.02917e-11	-0.580396	0.292	0.518	1.74558e-07
Tbca	1.05126e-11	-0.358528	0.088	0.288	1.78305e-07
Uqcrb	1.08163e-11	-0.419869	0.142	0.364	1.83455e-07
Abi3	1.10784e-11	-0.479207	0.058	0.224	1.87901e-07
Tmem216	1.12791e-11	0.631135	0.362	0.162	1.91305e-07
Cox7a2l	1.12949e-11	-0.462117	0.25	0.494	1.91573e-07
Bloc1s2a	1.15391e-11	-0.528509	0.069	0.251	1.95715e-07
Herpud1	1.15621e-11	-0.640423	0.288	0.505	1.96105e-07
Lgals3bp	1.18077e-11	-0.5032	0.038	0.192	2.0027e-07
Polr2h	1.29665e-11	-0.278434	0.004	0.118	2.19925e-07
Mcoln1	1.30481e-11	-0.280482	0.058	0.238	2.2131e-07
Acaa2	1.3132e-11	-0.47937	0.1	0.297	2.22733e-07
Itgb1	1.32186e-11	-0.400875	0.123	0.329	2.24201e-07
Coro1b	1.33571e-11	-0.630046	0.388	0.636	2.2655e-07
Nsmce1	1.35586e-11	-0.303344	0.077	0.269	2.29968e-07
Aldh2	1.35779e-11	0.370309	0.865	0.718	2.30294e-07
Snx2	1.35917e-11	-0.417261	0.135	0.352	2.30529e-07
Prc1	1.39448e-11	-0.288661	0.212	0.389	2.36518e-07
Megf9	1.42775e-11	0.362075	0.6	0.369	2.4216e-07
B4galnt1	1.42969e-11	-0.661908	0.373	0.573	2.4249e-07
Tmem176b	1.44804e-11	-0.788527	0.012	0.135	2.45602e-07
Npepps	1.46084e-11	0.335612	0.608	0.393	2.47774e-07
Pigs	1.48388e-11	-0.467955	0.123	0.326	2.51682e-07
Mrpl18	1.53336e-11	-0.340258	0.192	0.425	2.60074e-07
Lair1	1.54541e-11	-0.34802	0.073	0.262	2.62117e-07
Prps1	1.58246e-11	-0.25767	0.019	0.163	2.68401e-07
Mrps16	1.58276e-11	-0.366674	0.054	0.23	2.68451e-07
Aurka	1.59104e-11	-0.397744	0.073	0.244	2.69857e-07
Suv420h2	1.62573e-11	-0.269502	0.088	0.286	2.7574e-07
Vps26a	1.62703e-11	-0.252523	0.142	0.361	2.75961e-07
Ndufs8	1.63804e-11	-0.575623	0.154	0.368	2.77828e-07
Gsto1	1.67281e-11	-0.404016	0.046	0.213	2.83724e-07
Psmd8	1.69706e-11	-0.434819	0.181	0.407	2.87839e-07
Mgst3	1.7028e-11	-0.317147	0.008	0.133	2.88811e-07
Cd300e	1.70457e-11	-1.26062	0.008	0.123	2.89112e-07
Etfb	1.71106e-11	-0.547042	0.208	0.441	2.90213e-07
Cxcr4	1.75091e-11	-0.251725	1	0.916	2.96972e-07
Ndufs6	1.75494e-11	-0.251363	0.142	0.353	2.97655e-07
Parp2	1.7715e-11	-0.280668	0.073	0.255	3.00464e-07
Tob1	1.82007e-11	0.290161	0.338	0.148	3.08703e-07
Hfe	1.85258e-11	-0.681511	0.027	0.167	3.14216e-07
Hspe1	1.87941e-11	-0.266099	0.077	0.228	3.18766e-07
Metrnl	1.91693e-11	-0.361979	0.015	0.151	3.2513e-07
Eef1b2	1.93816e-11	-0.346042	0.231	0.459	3.28732e-07
Atp5d	1.99406e-11	-0.471855	0.292	0.529	3.38212e-07
Mrps34	1.99697e-11	-0.357776	0.027	0.178	3.38707e-07
Morf4l1	2.00376e-11	-0.365339	0.562	0.754	3.39857e-07
Rnf7	2.01609e-11	-0.272205	0.088	0.272	3.41949e-07
Ncoa3	2.03513e-11	-0.269668	0.542	0.709	3.45179e-07
Eif3h	2.0634e-11	-0.597012	0.308	0.532	3.49974e-07
Eif3a	2.0901e-11	-0.262719	0.177	0.388	3.54502e-07
Selplg	2.09277e-11	-0.730547	0.669	0.823	3.54954e-07
Gadd45g	2.10872e-11	0.665779	0.358	0.185	3.5766e-07
H2-Ke2	2.11099e-11	-0.329286	0.062	0.24	3.58045e-07
Taf9	2.1268e-11	-0.450966	0.138	0.345	3.60726e-07
Mnf1	2.13793e-11	-0.367006	0.019	0.162	3.62614e-07
Hspa1a	2.24901e-11	-0.838665	0.046	0.192	3.81455e-07
Cyfip2	2.26768e-11	0.312048	0.681	0.477	3.84621e-07
Naaa	2.27254e-11	-0.378162	0.104	0.255	3.85445e-07
Babam1	2.29763e-11	-0.278685	0.077	0.263	3.89702e-07
Tmed10	2.34565e-11	-0.357793	0.369	0.585	3.97846e-07
Pcbp1	2.40685e-11	-0.304702	0.142	0.35	4.08225e-07
Psma5	2.41424e-11	-0.477879	0.104	0.304	4.09479e-07
Wdr74	2.52333e-11	-0.297845	0.008	0.121	4.27981e-07
H2afj	2.56188e-11	-0.295187	0.373	0.618	4.34521e-07
Cdk5rap3	2.71878e-11	-0.372733	0.042	0.207	4.61133e-07
Gtf2f1	2.92286e-11	-0.330458	0.077	0.266	4.95746e-07
Creld2	3.02082e-11	-0.452613	0.065	0.243	5.12362e-07
Snrnp70	3.04578e-11	-0.253151	0.212	0.444	5.16595e-07
Nucb1	3.19837e-11	-0.363618	0.192	0.422	5.42476e-07
Eif3m	3.23316e-11	-0.494774	0.138	0.351	5.48377e-07
Nelfe	3.23798e-11	-0.295135	0.031	0.184	5.49193e-07
Ndufb10	3.2739e-11	-0.52524	0.158	0.371	5.55286e-07
Ppp2r4	3.32809e-11	-0.382874	0.227	0.456	5.64477e-07
Rcbtb2	3.37165e-11	-0.260186	0.065	0.245	5.71865e-07
Gtf3a	3.45083e-11	-0.346425	0.042	0.207	5.85295e-07
Strap	3.5433e-11	-0.28237	0.146	0.363	6.00979e-07
Psmg2	3.62387e-11	-0.290291	0.015	0.147	6.14644e-07
Gm9846	3.70395e-11	-0.732481	0.338	0.549	6.28227e-07
Slpi	3.76473e-11	0.271644	0.742	0.552	6.38536e-07
Ythdf2	3.80338e-11	-0.265457	0.312	0.544	6.45091e-07
Bzw1	3.82942e-11	-0.319133	0.219	0.448	6.49509e-07
Nudt3	3.91783e-11	-0.315457	0.173	0.392	6.64504e-07
Trmt112	3.98063e-11	-0.446876	0.235	0.466	6.75155e-07
Naa20	3.99653e-11	-0.36738	0.05	0.196	6.77851e-07
Cnpy4	4.30883e-11	-0.271249	0.046	0.194	7.3082e-07
Ddx24	4.48959e-11	-0.319034	0.088	0.281	7.6148e-07
Dusp22	4.52755e-11	-0.461661	0.212	0.376	7.67917e-07
Emc10	4.54268e-11	-0.255532	0.077	0.261	7.70484e-07
Arpc5l	4.65095e-11	-0.381097	0.092	0.285	7.88847e-07
Ube2c	4.67732e-11	-0.699617	0.288	0.419	7.9332e-07
Il18bp	4.82923e-11	0.513011	0.242	0.087	8.19085e-07
Esyt1	4.8368e-11	-0.377006	0.169	0.358	8.2037e-07
Slc25a39	4.92561e-11	-0.449556	0.215	0.447	8.35432e-07
Lyn	4.95969e-11	-0.51066	0.488	0.703	8.41213e-07
Rheb	5.18858e-11	-0.307999	0.192	0.417	8.80034e-07
Psmb1	5.27849e-11	-0.43335	0.281	0.519	8.95285e-07
Kxd1	5.28696e-11	-0.379371	0.062	0.238	8.96721e-07
Rps27a	5.38913e-11	-0.640798	0.554	0.697	9.1405e-07
Slc35a4	5.51684e-11	-0.353177	0.104	0.303	9.35711e-07
Atp5b	5.68078e-11	-0.599422	0.469	0.62	9.63517e-07
Chchd1	5.71495e-11	-0.274893	0.031	0.181	9.69312e-07
Prkcsh	5.93772e-11	-0.334626	0.046	0.208	1.0071e-06
Gpr35	5.94238e-11	-0.417492	0.288	0.484	1.00789e-06
Ndufb4	6.09466e-11	-0.300905	0.092	0.268	1.03372e-06
Cox5b	6.29974e-11	-0.549935	0.269	0.494	1.0685e-06
Xbp1	6.38239e-11	-0.478539	0.273	0.501	1.08252e-06
Mrpl2	6.40631e-11	-0.362897	0.038	0.196	1.08657e-06
Apex1	6.74712e-11	-0.261475	0.015	0.131	1.14438e-06
Rftn1	6.76127e-11	-0.412362	0.019	0.151	1.14678e-06
Cox7a2	6.89394e-11	-0.352083	0.204	0.431	1.16928e-06
Cenpa	6.99885e-11	-0.305983	0.119	0.323	1.18708e-06
Morf4l2	7.13918e-11	-0.364234	0.131	0.326	1.21088e-06
Arl6ip5	7.43435e-11	-0.538843	0.288	0.522	1.26094e-06
2019-09-02	7.47912e-11	-0.516133	0.512	0.653	1.26853e-06
H2afz	7.49747e-11	-0.785611	0.765	0.774	1.27165e-06
Prpsap1	7.59472e-11	-0.402251	0.069	0.245	1.28814e-06
Oxa1l	7.63224e-11	-0.319387	0.077	0.256	1.2945e-06
Cct6a	7.84689e-11	-0.366936	0.096	0.29	1.33091e-06
Hspa1b	7.86204e-11	-0.543609	0.023	0.149	1.33348e-06
Cnn2	7.94563e-11	0.281895	0.946	0.881	1.34766e-06
Edem2	8.06123e-11	-0.485014	0.131	0.337	1.36727e-06
Prep	8.18032e-11	-0.303708	0.058	0.227	1.38746e-06
2410006H16Rik	8.31192e-11	-0.575385	0.154	0.365	1.40978e-06
Cacybp	8.55281e-11	-0.259423	0.108	0.296	1.45064e-06
Epsti1	8.72752e-11	-0.377482	0.035	0.181	1.48027e-06
Uqcrfs1	8.77483e-11	-0.536472	0.208	0.429	1.4883e-06
Mpo	8.88785e-11	-3.20968	0.246	0.357	1.50747e-06
Ssr1	9.23642e-11	-0.295927	0.769	0.845	1.56659e-06
Tmem256	9.38308e-11	-0.303835	0.154	0.365	1.59146e-06
Myc	9.39264e-11	-0.250036	0.012	0.127	1.59309e-06
Cox6b1	9.64912e-11	-0.466328	0.254	0.483	1.63659e-06
Ndufc1	1.00844e-10	-0.279732	0.088	0.275	1.71042e-06
Emc6	1.01313e-10	-0.331104	0.073	0.254	1.71837e-06
Mrps9	1.01573e-10	-0.310759	0.042	0.195	1.72277e-06
Plod3	1.02332e-10	-0.406088	0.173	0.385	1.73565e-06
Haao	1.03299e-10	-0.364374	0.012	0.135	1.75205e-06
Cyb5r3	1.03637e-10	-0.367326	0.142	0.35	1.75778e-06
0610010K14Rik	1.03802e-10	-0.320013	0.092	0.281	1.76058e-06
Fcnb	1.06714e-10	-0.503749	0.027	0.171	1.80998e-06
1110038B12Rik	1.07939e-10	-0.28935	0.008	0.126	1.83075e-06
Srsf6	1.08407e-10	-0.28381	0.2	0.422	1.83869e-06
Pttg1	1.11023e-10	-0.433007	0.085	0.27	1.88305e-06
Cep19	1.17022e-10	0.502578	0.342	0.156	1.98481e-06
Sdf4	1.17625e-10	-0.264377	0.227	0.456	1.99504e-06
Prpf38b	1.19637e-10	-0.318141	0.192	0.388	2.02916e-06
Sec13	1.30321e-10	-0.497296	0.154	0.362	2.21037e-06
Msra	1.32937e-10	0.49175	0.604	0.385	2.25474e-06
Capg	1.34409e-10	-0.623365	0.077	0.249	2.27971e-06
B3gnt8	1.34785e-10	-0.342308	0.023	0.15	2.28609e-06
Ndufv2	1.35188e-10	-0.424639	0.177	0.393	2.29293e-06
Ints12	1.43234e-10	0.353483	0.365	0.252	2.4294e-06
Aimp1	1.47076e-10	-0.297708	0.031	0.178	2.49456e-06
Papd4	1.48519e-10	-0.342023	0.096	0.285	2.51903e-06
Ywhah	1.49407e-10	-0.483263	0.296	0.526	2.53409e-06
Mcu	1.55641e-10	0.343991	0.558	0.365	2.63983e-06
Ptgr1	1.59311e-10	-0.265547	0.081	0.214	2.70208e-06
Tsnax	1.60024e-10	-0.270057	0.031	0.177	2.71416e-06
Ccnb1	1.60243e-10	-0.52294	0.096	0.269	2.71788e-06
Bmyc	1.67154e-10	-0.328361	0.012	0.125	2.8351e-06
Tufm	1.69416e-10	-0.292397	0.058	0.224	2.87347e-06
Ppil1	1.71264e-10	-0.397799	0.073	0.249	2.90481e-06
Atp1a3	1.76964e-10	-0.785396	0.562	0.739	3.00149e-06
Mrps18a	1.94915e-10	-0.340124	0.073	0.25	3.30595e-06
Slc20a1	1.95443e-10	-0.251939	0.023	0.159	3.3149e-06
Rsl24d1	2.12732e-10	-0.348896	0.112	0.296	3.60815e-06
Galnt9	2.16205e-10	-0.380622	0.015	0.119	3.66705e-06
AI413582	2.16749e-10	-0.385609	0.092	0.276	3.67629e-06
Unc93b1	2.17819e-10	-0.753296	0.504	0.659	3.69444e-06
Slc17a9	2.41517e-10	0.398791	0.304	0.142	4.09638e-06
Psmc1	2.48292e-10	-0.467762	0.154	0.353	4.21128e-06
Scamp3	2.52432e-10	-0.35936	0.077	0.255	4.2815e-06
Klf7	2.53914e-10	0.477031	0.265	0.107	4.30664e-06
Zfp36l1	2.55964e-10	-0.466068	0.073	0.21	4.34141e-06
2810428I15Rik	2.63295e-10	-0.312147	0.035	0.179	4.46575e-06
Pabpc1	2.91089e-10	-0.406427	0.685	0.782	4.93716e-06
Tor3a	2.95734e-10	-0.313636	0.054	0.214	5.01594e-06
Atxn10	2.98732e-10	0.446858	0.635	0.487	5.0668e-06
Cuta	3.03143e-10	-0.457093	0.119	0.315	5.14161e-06
Zmat5	3.23336e-10	-0.259047	0.027	0.159	5.4841e-06
Kif22	3.27233e-10	-0.383991	0.085	0.25	5.5502e-06
Upp1	3.33299e-10	0.52109	0.123	0.018	5.65309e-06
Lamtor5	3.34649e-10	-0.39255	0.142	0.346	5.67598e-06
D8Ertd738e	3.35835e-10	-0.505695	0.235	0.459	5.6961e-06
Pnpla8	3.63598e-10	0.338632	0.354	0.191	6.16698e-06
Ndufb5	3.73149e-10	-0.267909	0.119	0.311	6.32898e-06
Sepp1	3.76264e-10	-0.839228	0.269	0.472	6.38181e-06
Hnrnpf	3.88467e-10	-0.637329	0.585	0.7	6.58879e-06
Mvb12a	3.89505e-10	-0.36963	0.065	0.233	6.60639e-06
Hist1h4d	3.92895e-10	-0.813608	0.204	0.392	6.6639e-06
Trem2	3.99758e-10	-0.295237	0.004	0.103	6.7803e-06
Ostf1	4.42151e-10	0.321144	0.927	0.838	7.49931e-06
Timm8b	4.48631e-10	-0.33884	0.069	0.236	7.60922e-06
Il6ra	4.51653e-10	-0.619506	0.312	0.501	7.66049e-06
Tubb2a	4.51897e-10	-0.36405	0.023	0.153	7.66462e-06
Glt25d1	4.5221e-10	-0.285501	0.05	0.2	7.66993e-06
Arf4	4.54212e-10	-0.453185	0.292	0.502	7.70389e-06
Ptcd2	4.56767e-10	-0.391283	0.031	0.168	7.74723e-06
Phb2	4.58325e-10	-0.410498	0.119	0.311	7.77365e-06
Mta2	4.72814e-10	-0.29051	0.227	0.448	8.0194e-06
Sdhb	4.79413e-10	-0.46809	0.223	0.442	8.13133e-06
Emb	4.9011e-10	-0.654981	0.365	0.546	8.31275e-06
Snrnp40	4.92535e-10	-0.264424	0.085	0.263	8.35388e-06
Nsf	4.98716e-10	-0.252381	0.108	0.296	8.45873e-06
Cyc1	5.01744e-10	-0.275145	0.146	0.344	8.51008e-06
Tmsb10	5.05878e-10	-1.01743	0.558	0.62	8.58019e-06
Fcgr1	5.06115e-10	-0.259734	0.015	0.136	8.58421e-06
Srm	5.18092e-10	-0.357248	0.019	0.125	8.78736e-06
Psmb4	5.231e-10	-0.440319	0.1	0.281	8.87229e-06
Vamp5	5.30813e-10	0.299717	0.323	0.227	9.00312e-06
Coro1c	5.39126e-10	-0.369115	0.15	0.351	9.14412e-06
Atp5k	5.40361e-10	-0.363019	0.158	0.363	9.16507e-06
Eif3c	5.47949e-10	-0.266969	0.196	0.407	9.29376e-06
Pmaip1	5.47974e-10	-0.493566	0.065	0.231	9.29418e-06
Commd3	5.82523e-10	-0.370142	0.088	0.268	9.88017e-06
Cd300ld	5.90493e-10	-0.79299	0.096	0.249	1.00153e-05
Ndufb3	6.0241e-10	-0.36342	0.15	0.351	1.02175e-05
Ube2e1	6.03071e-10	-0.360737	0.062	0.225	1.02287e-05
Fbxo22	6.1948e-10	-0.294881	0.208	0.399	1.0507e-05
Sec61a1	6.19806e-10	-0.506178	0.377	0.584	1.05125e-05
Utp3	6.25059e-10	-0.253193	0.085	0.262	1.06016e-05
Exosc3	6.52213e-10	-0.36928	0.054	0.213	1.10622e-05
Btf3	6.65214e-10	-0.59399	0.412	0.564	1.12827e-05
Nfe2	6.95195e-10	0.316978	0.788	0.611	1.17912e-05
Zfp710	6.98738e-10	-0.268327	0.365	0.59	1.18513e-05
Clic1	7.21782e-10	-0.457719	0.669	0.81	1.22421e-05
Ctsb	7.29783e-10	-0.760414	0.688	0.767	1.23779e-05
Cybasc3	7.37606e-10	0.46545	0.442	0.35	1.25105e-05
Myg1	7.69347e-10	-0.260193	0.038	0.183	1.30489e-05
Ccl2	7.7923e-10	-0.589501	0.012	0.117	1.32165e-05
S100a1	7.94405e-10	-0.418099	0.069	0.237	1.34739e-05
S100a6	8.01658e-10	0.293719	0.765	0.558	1.35969e-05
Hnrnph1	8.05044e-10	-0.305022	0.131	0.322	1.36544e-05
Idh3b	8.13306e-10	-0.465824	0.131	0.321	1.37945e-05
Nfkb1	8.17836e-10	-0.281967	0.085	0.242	1.38713e-05
Rps12	8.17916e-10	-0.523326	0.181	0.373	1.38727e-05
Skp1a	8.21508e-10	-0.257368	0.304	0.525	1.39336e-05
Uqcrh	8.64349e-10	-0.41285	0.154	0.355	1.46602e-05
Notch2	8.8273e-10	-0.258262	0.846	0.906	1.4972e-05
Mbnl1	8.87909e-10	-0.287208	0.392	0.606	1.50598e-05
Ppdpf	9.40442e-10	-0.380669	0.058	0.218	1.59508e-05
Tbc1d15	9.83176e-10	-0.31313	0.119	0.309	1.66756e-05
Commd10	1.00753e-09	-0.26779	0.027	0.148	1.70887e-05
Ruvbl2	1.06248e-09	-0.317069	0.062	0.219	1.80207e-05
Agpat2	1.11408e-09	0.493577	0.427	0.231	1.8896e-05
Slfn8	1.11934e-09	-0.267244	0.112	0.285	1.8985e-05
Hmox2	1.18134e-09	-0.518015	0.185	0.392	2.00367e-05
Laptm5	1.18716e-09	-0.533392	0.912	0.947	2.01354e-05
Akap8	1.23945e-09	-0.260094	0.231	0.423	2.10224e-05
Pde2a	1.44353e-09	0.380464	0.673	0.475	2.44837e-05
Napa	1.48534e-09	-0.406354	0.165	0.367	2.51928e-05
Hdac5	1.52875e-09	-0.344067	0.108	0.291	2.59291e-05
Mrpl30	1.60957e-09	-0.386556	0.096	0.274	2.72999e-05
Samm50	1.6577e-09	-0.379496	0.127	0.312	2.81162e-05
Bsg	1.67119e-09	-0.517322	0.292	0.5	2.8345e-05
2019-03-02	1.68105e-09	-0.253325	0.046	0.191	2.85124e-05
Sumo3	1.70646e-09	-0.295344	0.119	0.299	2.89433e-05
Actn4	1.72847e-09	-0.329098	0.215	0.422	2.93165e-05
Cdkn1b	1.73279e-09	-0.301386	0.569	0.746	2.93899e-05
Aif1	1.74723e-09	-0.331806	0.023	0.144	2.96347e-05
Fcf1	1.76548e-09	-0.339395	0.088	0.262	2.99444e-05
Eif3d	1.77163e-09	-0.412212	0.138	0.327	3.00487e-05
Memo1	1.78908e-09	-0.254007	0.023	0.149	3.03446e-05
Cox8a	1.79094e-09	-0.524519	0.538	0.662	3.03762e-05
Mcts1	1.80734e-09	-0.352435	0.058	0.213	3.06544e-05
Atraid	1.81954e-09	-0.358595	0.031	0.165	3.08612e-05
Trpv2	1.835e-09	-0.526042	0.131	0.31	3.11234e-05
Ssb	1.8476e-09	-0.285551	0.204	0.409	3.13372e-05
B2m	1.89947e-09	-0.569593	0.95	0.939	3.2217e-05
Ywhae	1.91734e-09	-0.36978	0.358	0.579	3.252e-05
Trappc1	2.01544e-09	-0.438527	0.131	0.321	3.41838e-05
Qsox1	2.05952e-09	0.365107	0.658	0.488	3.49315e-05
Cyp27a1	2.11644e-09	-0.365504	0.008	0.105	3.58969e-05
Usf1	2.21244e-09	-0.345111	0.054	0.207	3.75251e-05
Sub1	2.23728e-09	-0.252506	0.396	0.572	3.79466e-05
Degs1	2.33356e-09	0.374748	0.727	0.608	3.95794e-05
Ripk3	2.37052e-09	-0.266022	0.046	0.192	4.02064e-05
Max	2.38054e-09	0.375465	0.673	0.481	4.03764e-05
Msrb1	2.44292e-09	-0.404327	0.854	0.885	4.14343e-05
Gpaa1	2.5334e-09	-0.352101	0.065	0.219	4.29689e-05
Cdca4	2.5754e-09	-0.254715	0.112	0.293	4.36813e-05
Tmem242	2.60747e-09	-0.299793	0.062	0.219	4.42254e-05
Gaa	2.68207e-09	-0.269326	0.115	0.245	4.54906e-05
Rbx1	2.71923e-09	-0.265014	0.265	0.482	4.61209e-05
Cdca7	2.75905e-09	-0.296237	0.073	0.233	4.67962e-05
Daxx	2.77868e-09	-0.32311	0.038	0.175	4.71291e-05
H1f0	2.81432e-09	-0.358092	0.088	0.257	4.77337e-05
Abhd12	2.8735e-09	-0.462018	0.077	0.234	4.87375e-05
Elof1	2.98262e-09	-0.260107	0.088	0.26	5.05882e-05
Ndufv1	2.9858e-09	-0.413385	0.142	0.329	5.06421e-05
Fech	3.04792e-09	-0.279633	0.081	0.216	5.16958e-05
Emg1	3.20635e-09	-0.401006	0.104	0.281	5.43828e-05
Polb	3.34044e-09	-0.279272	0.054	0.203	5.66572e-05
Ugt1a7c	3.72312e-09	-0.330468	0.127	0.312	6.31479e-05
Prdx3	3.75553e-09	-0.427028	0.088	0.254	6.36975e-05
Cd97	3.80327e-09	-0.5536	0.415	0.632	6.45073e-05
Arl1	3.95663e-09	-0.263175	0.096	0.269	6.71085e-05
Mppe1	3.9914e-09	0.46717	0.427	0.292	6.76981e-05
Uqcr10	4.10309e-09	-0.293251	0.135	0.316	6.95925e-05
Slc38a10	4.10513e-09	-0.266352	0.135	0.322	6.96272e-05
Hebp1	4.17687e-09	-0.37388	0.088	0.255	7.08438e-05
Psmd13	4.20012e-09	-0.454101	0.208	0.4	7.12382e-05
Fth1	4.30056e-09	-0.666687	0.935	0.96	7.29418e-05
Nxf1	4.42774e-09	-0.357983	0.219	0.427	7.50988e-05
Ccdc124	4.47387e-09	-0.330738	0.135	0.321	7.58812e-05
Spcs2	4.48534e-09	-0.348717	0.315	0.512	7.60758e-05
Dazap2	4.57063e-09	-0.558281	0.869	0.936	7.75224e-05
Pycr2	4.64929e-09	-0.268217	0.046	0.186	7.88566e-05
Adrbk2	4.64949e-09	-0.403402	0.069	0.218	7.88599e-05
Mrpl40	4.67082e-09	-0.256935	0.165	0.326	7.92219e-05
Slc11a1	4.88343e-09	-0.695757	0.227	0.386	8.28278e-05
Ppm1m	4.91333e-09	0.480441	0.515	0.345	8.3335e-05
Ica1	5.84759e-09	0.439122	0.235	0.111	9.91809e-05
Copg1	5.93567e-09	-0.297937	0.115	0.292	0.000100675
Vimp	6.11145e-09	-0.352333	0.119	0.299	0.000103656
Aaas	6.1672e-09	-0.264435	0.046	0.175	0.000104602
Tfg	6.18273e-09	-0.307413	0.104	0.278	0.000104865
Egr1	6.32766e-09	-1.4517	0.112	0.232	0.000107323
Acp5	6.3867e-09	-0.668387	0.081	0.24	0.000108325
Tada1	6.53855e-09	-0.271841	0.062	0.214	0.0001109
Exosc7	6.5661e-09	-0.37741	0.073	0.218	0.000111368
Hp1bp3	6.59937e-09	-0.333882	0.281	0.486	0.000111932
Abhd15	6.92482e-09	-0.564192	0.108	0.238	0.000117452
Il18rap	6.99806e-09	0.310123	0.319	0.151	0.000118694
Sox13	7.29709e-09	0.300847	0.346	0.189	0.000123766
S1pr4	7.34429e-09	0.430612	0.419	0.27	0.000124567
Ncf4	7.40993e-09	0.301153	0.912	0.826	0.00012568
Sgpl1	7.54615e-09	-0.307251	0.158	0.347	0.00012799
Vcp	7.61282e-09	-0.318787	0.308	0.514	0.000129121
Eif4h	7.6804e-09	-0.433578	0.331	0.543	0.000130267
Pltp	7.76632e-09	-0.690482	0.012	0.111	0.000131725
Cnot8	7.78719e-09	-0.29242	0.173	0.362	0.000132078
Khk	7.8424e-09	-0.417034	0.081	0.243	0.000133015
Gm8615	7.94722e-09	-0.309513	0.088	0.251	0.000134793
Trim30a	8.31751e-09	-0.479015	0.273	0.457	0.000141073
Mthfd2	8.39285e-09	-0.253795	0.069	0.224	0.000142351
Rnf187	8.49936e-09	-0.270797	0.081	0.242	0.000144158
Ociad1	8.88366e-09	-0.424988	0.204	0.394	0.000150676
Mdp1	9.05e-09	-0.292738	0.154	0.321	0.000153497
Mettl7a1	9.26742e-09	-0.406206	0.1	0.232	0.000157185
Scarb2	9.34811e-09	-0.340112	0.042	0.177	0.000158553
Mars	9.36719e-09	-0.276768	0.054	0.2	0.000158877
Hps3	9.43241e-09	-0.341698	0.181	0.37	0.000159983
Ube2a	9.55737e-09	-0.311117	0.146	0.332	0.000162103
Fgd2	9.86226e-09	-0.430915	0.054	0.184	0.000167274
Sumo2	9.88412e-09	-0.404399	0.4	0.593	0.000167645
Vps16	1.00321e-08	-0.307346	0.081	0.228	0.000170154
Tmem106a	1.03297e-08	-0.28129	0.027	0.15	0.000175202
Eif1ax	1.05637e-08	-0.269036	0.096	0.261	0.000179172
Cdc37	1.06997e-08	-0.286278	0.215	0.415	0.000181478
Stip1	1.08448e-08	-0.286421	0.108	0.276	0.000183939
Ncoa4	1.11469e-08	0.408191	0.573	0.441	0.000189062
Taf6	1.13708e-08	-0.251368	0.062	0.21	0.000192861
Eif2b1	1.15026e-08	-0.261441	0.127	0.226	0.000195096
D10Jhu81e	1.2157e-08	-0.278437	0.042	0.172	0.000206195
Clec4d	1.22471e-08	-0.69658	0.027	0.147	0.000207723
Ptpn18	1.26093e-08	-0.270664	0.192	0.388	0.000213866
Aup1	1.26309e-08	-0.467254	0.496	0.701	0.000214232
H2-DMb1	1.33774e-08	-0.58945	0.119	0.256	0.000226894
Spcs3	1.43202e-08	-0.300252	0.185	0.371	0.000242885
Gps1	1.44304e-08	-0.405496	0.073	0.222	0.000244754
Glud1	1.46387e-08	-0.529912	0.404	0.583	0.000248287
Atp5j2	1.53017e-08	-0.316946	0.185	0.376	0.000259532
Hsp90ab1	1.55373e-08	-0.628389	0.615	0.726	0.000263528
Trappc5	1.57411e-08	-0.28843	0.069	0.221	0.000266984
Cyp4f18	1.60129e-08	-0.852635	0.392	0.59	0.000271594
Mrpl33	1.6201e-08	-0.571143	0.304	0.508	0.000274785
1300018J18Rik	1.62668e-08	0.41362	0.238	0.139	0.000275902
Mrpl24	1.62834e-08	-0.279907	0.073	0.226	0.000276182
Sar1b	1.63131e-08	-0.342412	0.077	0.233	0.000276687
1110004F10Rik	1.67871e-08	-0.308328	0.154	0.339	0.000284726
Polr2j	1.73319e-08	-0.404639	0.142	0.323	0.000293966
Sfr1	1.78416e-08	-0.284943	0.169	0.358	0.000302611
Hdac1	1.87342e-08	-0.305134	0.162	0.34	0.000317751
Ubap2l	1.88643e-08	-0.350823	0.273	0.452	0.000319958
Nkg7	1.9321e-08	-1.0991	0.1	0.202	0.000327704
Tcf7l2	1.98471e-08	-0.328375	0.062	0.201	0.000336626
Nubp2	1.99181e-08	-0.306254	0.096	0.258	0.00033783
Vdac1	2.00059e-08	-0.269903	0.25	0.452	0.000339321
Kdelr1	2.37881e-08	-0.344958	0.188	0.38	0.000403469
A130077B15Rik	2.4282e-08	-0.289902	0.996	0.998	0.000411846
Fut8	2.43187e-08	-0.269162	0.577	0.707	0.000412469
Sdha	2.43204e-08	-0.415961	0.227	0.406	0.000412498
Aph1a	2.46618e-08	-0.259378	0.188	0.38	0.000418289
Spr	2.59544e-08	-0.277984	0.015	0.12	0.000440212
Alg5	2.62949e-08	-0.267635	0.05	0.181	0.000445988
Ckap4	2.63261e-08	0.328879	0.415	0.251	0.000446517
Adrm1	2.70849e-08	-0.416228	0.154	0.335	0.000459386
Sat1	2.7103e-08	-0.692024	0.923	0.942	0.000459694
Polr2d	2.71333e-08	-0.299187	0.065	0.204	0.000460208
Stat6	2.73155e-08	-0.465139	0.35	0.554	0.000463298
Tpgs1	2.73686e-08	-0.30873	0.077	0.225	0.0004642
Ccdc69	2.80575e-08	-0.297311	0.012	0.111	0.000475884
Cox6c	2.91288e-08	-0.345252	0.227	0.424	0.000494053
Atp5g3	2.91523e-08	-0.432838	0.242	0.425	0.000494452
Lasp1	2.91658e-08	0.300943	0.704	0.529	0.000494681
Sh3bp5	2.91801e-08	0.371424	0.442	0.275	0.000494923
Atp6ap2	2.94955e-08	-0.475181	0.296	0.492	0.000500273
Edf1	2.9589e-08	-0.272857	0.235	0.433	0.000501858
Cops7a	2.98105e-08	-0.265108	0.058	0.185	0.000505617
Vps36	3.10807e-08	-0.260861	0.1	0.261	0.00052716
Pgrmc1	3.1894e-08	-0.372811	0.065	0.209	0.000540955
Adssl1	3.2861e-08	-0.516866	0.262	0.459	0.000557355
Icam1	3.31859e-08	-0.306863	0.019	0.127	0.000562866
Psme1	3.33778e-08	-0.414264	0.235	0.429	0.000566121
G6pdx	3.343e-08	0.426901	0.619	0.483	0.000567006
Bcl2a1d	3.41197e-08	-0.738665	0.042	0.149	0.000578704
Cirbp	3.42174e-08	-0.337046	0.108	0.273	0.000580361
Dcaf8	3.42718e-08	-0.26597	0.069	0.214	0.000581285
Ccdc115	3.46906e-08	-0.258005	0.123	0.294	0.000588388
Rpn1	3.6237e-08	-0.313719	0.377	0.561	0.000614616
Slc25a24	3.63639e-08	0.348608	0.392	0.28	0.000616768
Abcg1	3.64482e-08	-0.453696	0.331	0.499	0.000618198
5830432E09Rik	3.84372e-08	0.268292	0.577	0.418	0.000651934
Coq9	3.9313e-08	-0.250777	0.031	0.151	0.000666788
Cd74	3.93236e-08	-2.31386	0.073	0.196	0.000666967
5430421N21Rik	3.96592e-08	0.325502	0.123	0.028	0.000672659
Eno3	4.72315e-08	-0.881934	0.012	0.107	0.000801093
Sharpin	4.7343e-08	-0.273201	0.177	0.362	0.000802984
Nars	4.7432e-08	-0.254947	0.158	0.338	0.000804495
Gtf2a2	4.80825e-08	-0.272023	0.092	0.245	0.000815528
Ear1	4.88124e-08	-1.44002	0.538	0.524	0.000827908
Tmem40	4.88962e-08	0.474541	0.312	0.153	0.000829328
Nop16	4.89021e-08	-0.292779	0.115	0.257	0.000829429
Ndufs2	4.98503e-08	-0.294517	0.185	0.369	0.000845512
Tmem179b	4.99107e-08	-0.269333	0.2	0.381	0.000846536
Rps27	5.14355e-08	-0.867897	0.088	0.212	0.000872398
Prkd2	5.16522e-08	0.255907	0.315	0.16	0.000876072
Pisd	5.26584e-08	-0.3286	0.108	0.268	0.00089314
Cndp2	5.3434e-08	-0.479216	0.154	0.327	0.000906294
Idh1	5.49492e-08	-0.349444	0.154	0.332	0.000931994
Pon2	5.79897e-08	-0.325165	0.131	0.298	0.000983563
Gm6644	5.89823e-08	-0.32282	0.088	0.243	0.0010004
Cox4i1	6.41928e-08	-0.492245	0.569	0.685	0.00108877
Pithd1	6.54938e-08	-0.424442	0.062	0.198	0.00111084
Rnase4	6.72172e-08	-0.338214	0.027	0.133	0.00114007
2010002M12Rik	7.25208e-08	0.277389	0.2	0.175	0.00123003
Sigmar1	7.25928e-08	-0.253691	0.054	0.189	0.00123125
U2af1	7.28881e-08	-0.297172	0.212	0.4	0.00123626
Slc25a1	7.29907e-08	-0.266999	0.042	0.168	0.001238
Laptm4a	7.36586e-08	-0.37058	0.288	0.487	0.00124932
Amer2	7.45709e-08	0.307806	0.181	0.059	0.0012648
Rn4.5s	7.81761e-08	-0.356942	0.481	0.653	0.00132595
Sgta	7.84312e-08	-0.396703	0.138	0.309	0.00133027
Mrps23	8.75919e-08	-0.254133	0.027	0.136	0.00148565
Pomp	8.85869e-08	-0.331372	0.227	0.417	0.00150252
Ppp2r5c	9.05772e-08	-0.414706	0.365	0.542	0.00153628
Sord	9.18586e-08	-0.293302	0.05	0.161	0.00155801
Psmg1	9.53815e-08	-0.266247	0.027	0.139	0.00161777
Jtb	9.6624e-08	-0.253185	0.065	0.206	0.00163884
Cks2	9.72132e-08	-0.250388	0.165	0.339	0.00164883
Map2k1	9.83971e-08	-0.368915	0.196	0.38	0.00166891
Myo1g	1.01848e-07	-0.648081	0.377	0.544	0.00172745
Abtb1	1.08792e-07	0.367821	0.492	0.338	0.00184522
Psmd3	1.09492e-07	-0.306478	0.085	0.23	0.00185709
Anxa4	1.11101e-07	-0.302918	0.046	0.167	0.00188438
H2-M3	1.11877e-07	-0.281781	0.012	0.101	0.00189755
S1pr5	1.12563e-07	-0.55716	0.046	0.133	0.00190919
Psmd4	1.1304e-07	-0.333863	0.181	0.356	0.00191727
Ewsr1	1.18809e-07	-0.441542	0.388	0.565	0.00201512
Asah1	1.22508e-07	-0.370639	0.204	0.388	0.00207786
Psmb2	1.22928e-07	-0.317133	0.242	0.431	0.00208498
Psmc2	1.2543e-07	-0.253218	0.138	0.306	0.00212741
Rab7l1	1.26935e-07	-0.272788	0.119	0.28	0.00215295
Hnrnpk	1.35547e-07	-0.474163	0.719	0.787	0.00229902
Tubb6	1.5376e-07	-0.336992	0.015	0.101	0.00260792
Fam162a	1.5909e-07	-0.262613	0.035	0.151	0.00269832
Hsd3b7	1.63528e-07	-0.296343	0.05	0.178	0.0027736
Sdhd	1.64744e-07	-0.438551	0.223	0.409	0.00279422
Cox6a1	1.69428e-07	-0.301922	0.242	0.428	0.00287366
Hsd11b1	1.72814e-07	0.482836	0.562	0.381	0.00293109
Got2	1.75843e-07	-0.285808	0.208	0.391	0.00298247
Bid	1.76386e-07	-0.335387	0.146	0.315	0.00299169
Gm16894	1.84293e-07	-0.308833	0.215	0.208	0.0031258
Pold4	1.85311e-07	-0.339473	0.1	0.251	0.00314305
Pmpcb	1.86934e-07	-0.284488	0.062	0.196	0.00317059
Ifi27l1	1.95213e-07	0.353839	0.515	0.352	0.00331101
Esd	1.96693e-07	-0.276585	0.204	0.385	0.0033361
Reep5	1.994e-07	-0.262197	0.373	0.564	0.00338202
Wdr33	2.00451e-07	-0.255451	0.135	0.298	0.00339985
Fdps	2.09344e-07	-0.439696	0.169	0.317	0.00355068
Vkorc1	2.13368e-07	-0.28656	0.023	0.12	0.00361893
Ergic3	2.14485e-07	-0.293918	0.173	0.346	0.00363788
Jun	2.14518e-07	-0.711982	0.404	0.54	0.00363845
2019-09-01	2.16053e-07	0.274412	0.385	0.214	0.00366447
Ifnar1	2.2944e-07	-0.253837	0.958	0.981	0.00389153
Psmd7	2.36041e-07	-0.310419	0.142	0.299	0.00400349
Psmb6	2.54791e-07	-0.423142	0.277	0.466	0.0043215
Bre	2.75993e-07	-0.346013	0.165	0.337	0.00468112
Scamp4	2.76099e-07	-0.281457	0.042	0.148	0.00468291
1700123O20Rik	2.79936e-07	0.264146	0.277	0.279	0.00474799
Nfyc	2.83573e-07	-0.312846	0.115	0.272	0.00480968
Dctn3	2.90113e-07	-0.293315	0.177	0.347	0.00492061
Klf13	2.9962e-07	-0.256087	0.873	0.839	0.00508185
H13	3.08548e-07	-0.303243	0.338	0.52	0.00523329
Tubb4b	3.1783e-07	-0.573392	0.312	0.447	0.00539072
Wsb1	3.22928e-07	-0.259455	0.2	0.375	0.00547718
Cops5	3.31792e-07	-0.262695	0.081	0.221	0.00562752
Mthfs	3.34574e-07	0.403974	0.392	0.242	0.00567471
Aaed1	3.43051e-07	-0.387567	0.085	0.227	0.00581849
Sirpa	3.46043e-07	-0.524622	0.496	0.667	0.00586924
Csnk1a1	3.52754e-07	-0.309376	0.242	0.422	0.00598306
Ms4a3	3.56282e-07	-0.869817	0.127	0.224	0.0060429
Lrrc25	3.56819e-07	-0.484381	0.204	0.373	0.00605201
Themis2	3.61943e-07	-0.492322	0.196	0.364	0.00613891
Gm19705	3.71543e-07	0.366547	0.123	0.038	0.00630173
Dctn5	3.88214e-07	-0.339282	0.208	0.385	0.0065845
Lipa	3.89905e-07	-0.392511	0.181	0.35	0.00661318
Cdkn2d	3.9469e-07	0.423775	0.573	0.469	0.00669433
Gm9733	4.04968e-07	-0.659277	0.115	0.264	0.00686866
Sec61b	4.08837e-07	-0.451067	0.323	0.5	0.00693429
Arsg	4.27425e-07	0.281663	0.204	0.084	0.00724955
BC002163	4.37702e-07	-0.331209	0.173	0.343	0.00742386
Ssr3	4.66197e-07	-0.266485	0.25	0.425	0.00790716
Abhd11	4.8023e-07	-0.25653	0.05	0.167	0.00814518
Efhd2	5.25895e-07	0.308116	0.438	0.308	0.00891971
B3gnt2	5.2691e-07	0.389426	0.477	0.344	0.00893692
Pdcd2l	5.38251e-07	-0.284399	0.035	0.144	0.00912927
Commd4	5.74708e-07	-0.448427	0.119	0.272	0.00974762
Snx3	5.75939e-07	-0.465176	0.442	0.594	0.00976851
Hsf1	5.80246e-07	-0.26078	0.054	0.173	0.00984155
Vps72	5.99767e-07	-0.263582	0.135	0.288	0.0101726
Gys1	6.15316e-07	0.367941	0.319	0.189	0.0104364
Haus8	6.23875e-07	-0.394447	0.081	0.214	0.0105815
Uqcrq	6.27322e-07	-0.325128	0.292	0.466	0.01064
Ubb	6.30636e-07	-0.268277	0.996	0.993	0.0106962
Zcchc7	6.66605e-07	-0.279024	0.123	0.274	0.0113063
Klhl6	7.23581e-07	0.41056	0.319	0.249	0.0122727
Blvrb	7.37132e-07	-0.464792	0.038	0.148	0.0125025
Atp5c1	7.39614e-07	-0.527434	0.446	0.599	0.0125446
St3gal4	7.64535e-07	-0.292472	0.119	0.267	0.0129673
Mrpl27	7.67055e-07	-0.331524	0.427	0.556	0.01301
Echs1	7.7919e-07	-0.266754	0.123	0.269	0.0132158
Pcif1	7.99022e-07	-0.265927	0.177	0.344	0.0135522
Coa5	8.02325e-07	-0.275679	0.227	0.376	0.0136082
Cope	8.02702e-07	-0.521369	0.315	0.489	0.0136146
Tuba1c	8.04314e-07	-0.531794	0.3	0.444	0.013642
3230401D17Rik	8.49933e-07	-0.384318	0.162	0.32	0.0144157
Sfxn5	8.52051e-07	-0.611102	0.423	0.476	0.0144516
Ccnl2	9.11378e-07	-0.452775	0.246	0.415	0.0154579
Atp13a2	9.92659e-07	-0.260698	0.192	0.31	0.0168365
Tmem192	1.0275e-06	-0.278621	0.042	0.155	0.0174274
Fam50a	1.11497e-06	-0.297242	0.081	0.214	0.0189111
Lmo4	1.11737e-06	0.306293	0.7	0.547	0.0189516
Vps25	1.14748e-06	-0.251435	0.162	0.317	0.0194624
Vcam1	1.21653e-06	-0.365807	0.081	0.214	0.0206335
Ckb	1.23204e-06	-0.481661	0.023	0.109	0.0208967
Tpra1	1.2913e-06	-0.281505	0.062	0.185	0.0219017
Ube2l6	1.34733e-06	0.299065	0.412	0.458	0.0228521
Picalm	1.39315e-06	-0.271966	0.246	0.405	0.0236293
Sh3bgrl	1.43281e-06	-0.37304	0.285	0.456	0.0243019
Scand1	1.44236e-06	-0.2524	0.238	0.412	0.0244639
Gm12505	1.46163e-06	-0.294194	0.831	0.686	0.0247906
Pik3cd	1.53253e-06	-0.309542	0.227	0.392	0.0259932
Golga7	1.61741e-06	-0.274258	0.204	0.371	0.0274329
Grcc10	1.63154e-06	-0.334451	0.215	0.381	0.0276726
Lilra6	1.64937e-06	-0.416979	0.819	0.74	0.0279749
D10Wsu52e	1.73226e-06	-0.273204	0.088	0.22	0.0293809
Mafg	1.77087e-06	0.335945	0.35	0.24	0.0300357
Sbds	1.79892e-06	-0.395876	0.115	0.254	0.0305115
Cox14	1.82608e-06	-0.251371	0.138	0.287	0.0309722
Vps28	1.84893e-06	-0.405736	0.331	0.511	0.0313597
Ugdh	1.87693e-06	0.465318	0.246	0.194	0.0318346
Acsl1	1.94316e-06	0.294559	0.462	0.338	0.032958
Atp5j	1.96229e-06	-0.276423	0.254	0.427	0.0332824
Gpr137b-ps	2.0218e-06	-0.535261	0.2	0.358	0.0342918
Adam17	2.02291e-06	-0.270898	0.119	0.26	0.0343106
Ensa	2.11867e-06	-0.300577	0.165	0.321	0.0359347
Ogfr	2.12678e-06	-0.252489	0.073	0.2	0.0360724
Srp19	2.17516e-06	-0.276041	0.123	0.267	0.0368928
1810055G02Rik	2.18103e-06	0.415087	0.196	0.112	0.0369925
Safb	2.21702e-06	-0.35031	0.2	0.333	0.0376029
Rab14	2.23878e-06	-0.318841	0.273	0.445	0.0379719
Ifi47	2.34121e-06	-0.28636	0.038	0.144	0.0397092
Clec4b1	2.45931e-06	-0.546024	0.046	0.123	0.0417123
Emc4	2.49101e-06	-0.309561	0.081	0.2	0.04225
Tmem222	2.50766e-06	-0.256581	0.062	0.18	0.0425324
Timm10b	2.53548e-06	-0.263096	0.192	0.355	0.0430043
Fam58b	2.56168e-06	-0.261938	0.023	0.107	0.0434486
4933434E20Rik	2.70394e-06	-0.481777	0.308	0.481	0.0458615
Chchd2	2.71071e-06	-0.489184	0.504	0.629	0.0459764
Ccdc12	2.72059e-06	-0.297396	0.277	0.448	0.0461439
Srp14	2.76754e-06	-0.313727	0.227	0.388	0.0469403
Snx1	2.86905e-06	-0.280644	0.212	0.375	0.048662
Atxn2l	2.89095e-06	-0.329154	0.704	0.748	0.0490335
Tap1	2.90988e-06	-0.255031	0.077	0.201	0.0493545
BC100530	2.9885e-06	0.534652	0.212	0.093	0.0506879
Tpi1	3.17192e-06	-0.305406	0.231	0.398	0.0537989
Psmd14	3.25268e-06	-0.297707	0.2	0.353	0.0551687
Arglu1	3.36606e-06	-0.302667	0.619	0.706	0.0570918
Lpar6	3.41968e-06	-0.304969	0.154	0.305	0.0580012
Rab18	3.62129e-06	-0.258376	0.127	0.27	0.0614206
Bcl7b	3.84116e-06	-0.294911	0.1	0.231	0.0651499
Mcl1	3.93907e-06	-0.275356	0.254	0.422	0.0668105
Med21	4.1466e-06	-0.353214	0.092	0.222	0.0703305
Higd2a	4.17033e-06	-0.252703	0.119	0.252	0.0707331
Tcf25	4.67841e-06	-0.28742	0.296	0.466	0.0793505
Hist1h2ap	4.68751e-06	-0.554485	0.231	0.359	0.0795049
Tnfrsf1a	5.02972e-06	-0.559632	0.423	0.575	0.0853091
Tmed4	5.08945e-06	-0.287203	0.088	0.216	0.0863221
Mcrs1	5.28046e-06	-0.263851	0.096	0.224	0.0895618
Zdhhc6	5.58089e-06	-0.301898	0.131	0.273	0.0946575
Fuca1	5.82231e-06	-0.271951	0.346	0.518	0.0987522
Stx7	6.17488e-06	-0.315549	0.25	0.415	0.104732
Psma1	6.31714e-06	-0.390945	0.331	0.495	0.107145
Triap1	6.32739e-06	-0.299875	0.062	0.173	0.107319
Vrk3	6.55508e-06	-0.28357	0.115	0.249	0.111181
Chchd4	6.77049e-06	-0.254798	0.035	0.131	0.114834
Scrg1	6.83321e-06	0.265812	0.115	0.032	0.115898
Hexa	7.14626e-06	-0.309309	0.469	0.626	0.121208
Bap1	7.22205e-06	-0.264377	0.065	0.18	0.122493
Fyb	7.32621e-06	-0.528511	0.427	0.569	0.12426
Cyth4	7.63318e-06	-0.49742	0.415	0.57	0.129466
Clec2i	7.80627e-06	-0.375677	0.069	0.179	0.132402
Gemin7	8.283e-06	-0.340763	0.096	0.224	0.140488
Glipr1	8.82558e-06	-0.520544	0.296	0.454	0.149691
H3f3b	8.83934e-06	-0.394195	0.969	0.972	0.149924
Pdrg1	8.85274e-06	-0.305479	0.05	0.151	0.150151
Surf4	9.07892e-06	-0.353224	0.385	0.537	0.153987
Ucp2	9.402e-06	-0.426009	0.865	0.905	0.159467
Ear2	9.98904e-06	-1.7404	0.527	0.534	0.169424
Pecam1	1.00813e-05	-0.31454	0.038	0.126	0.170989
Tbc1d2	1.03031e-05	0.302856	0.273	0.191	0.17475
Enpp5	1.04257e-05	0.301749	0.154	0.097	0.17683
Vdac2	1.04602e-05	-0.263029	0.315	0.482	0.177415
Lamtor2	1.05746e-05	-0.253645	0.292	0.456	0.179356
Rel	1.06567e-05	-0.353	0.204	0.338	0.180749
Ndufa12	1.12684e-05	-0.317644	0.235	0.393	0.191124
Mrpl20	1.12751e-05	-0.340545	0.162	0.288	0.191237
Arrdc3	1.17158e-05	-0.297025	0.062	0.172	0.198711
Ankrd44	1.17761e-05	-0.293192	0.4	0.555	0.199735
Ptgir	1.21536e-05	0.279301	0.223	0.131	0.206137
Cox5a	1.25924e-05	-0.313627	0.346	0.501	0.213579
Mfap1b	1.31047e-05	-0.303801	0.162	0.303	0.222268
Tmed2	1.45788e-05	-0.401228	0.515	0.648	0.247271
Znrd1	1.47249e-05	-0.257385	0.05	0.153	0.249749
Trafd1	1.4896e-05	-0.265656	0.169	0.314	0.252652
Aspscr1	1.71642e-05	-0.292044	0.173	0.316	0.291122
Ear11	1.75268e-05	-0.257817	0.235	0.345	0.297272
Ube2i	1.7912e-05	-0.28835	0.315	0.472	0.303805
Hgsnat	1.82947e-05	-0.375329	0.096	0.215	0.310297
Stx11	1.86047e-05	0.36764	0.412	0.284	0.315554
Nsmce2	1.88717e-05	-0.277661	0.088	0.208	0.320083
Itfg3	2.03274e-05	-0.40221	0.096	0.216	0.344772
Polr1d	2.03353e-05	-0.330179	0.188	0.329	0.344908
Lime1	2.18192e-05	0.25511	0.196	0.107	0.370075
Ffar2	2.21407e-05	0.324141	0.254	0.151	0.375528
Bin2	2.27671e-05	-0.47486	0.592	0.733	0.386153
Slc44a2	2.28013e-05	-0.543493	0.312	0.448	0.386734
Arhgef4	2.28348e-05	0.28904	0.119	0.058	0.387302
Ubxn1	2.32382e-05	-0.351963	0.181	0.325	0.394143
Chst12	2.35839e-05	0.342803	0.573	0.457	0.400006
Ndufb8	2.38954e-05	-0.309608	0.335	0.496	0.40529
Rbm39	2.39503e-05	-0.33315	0.881	0.88	0.406222
Tlr2	2.50453e-05	-0.352116	0.065	0.173	0.424793
Mcfd2	2.59342e-05	-0.391773	0.088	0.204	0.43987
Trem1	2.86047e-05	-0.322628	0.512	0.381	0.485164
Rnf141	2.90403e-05	0.330905	0.365	0.261	0.492553
Atp5h	2.92321e-05	-0.379564	0.35	0.505	0.495806
BC147527	3.03384e-05	-0.279513	0.469	0.466	0.514569
Gm11974	3.08312e-05	-0.32555	0.219	0.322	0.522929
Zfp36	3.47381e-05	-0.603194	0.969	0.936	0.589192
Tmbim4	3.47676e-05	-0.355086	0.138	0.266	0.589694
Trpm2	3.61876e-05	-0.343712	0.373	0.338	0.613777
Cd164	3.71009e-05	0.251343	0.608	0.553	0.629269
Brk1	3.7413e-05	-0.324973	0.281	0.435	0.634561
Rbm17	3.80145e-05	-0.329122	0.227	0.373	0.644764
Tnfaip8l2	3.80457e-05	-0.364022	0.115	0.238	0.645293
Otub1	3.84682e-05	-0.294678	0.496	0.625	0.652459
Dnajb1	4.20276e-05	-0.258535	0.204	0.345	0.71283
Cdc42se2	4.76242e-05	-0.3331	0.238	0.386	0.807754
Eml2	4.85063e-05	0.312143	0.238	0.188	0.822715
Prss57	5.00838e-05	-0.349797	0.1	0.194	0.849472
Vps11	5.22282e-05	-0.286844	0.077	0.184	0.885842
Unc119	5.31832e-05	0.263517	0.154	0.111	0.90204
Gpr84	5.35794e-05	0.371083	0.123	0.066	0.90876
Samhd1	5.44323e-05	-0.439636	0.45	0.606	0.923225
Ano10	5.75652e-05	0.318252	0.25	0.135	0.976363
Igfbp4	5.94134e-05	-0.346007	0.169	0.268	1
Acaa1a	6.55312e-05	-0.298992	0.192	0.327	1
Dmap1	6.61219e-05	-0.319193	0.027	0.102	1
Ttc1	6.8008e-05	-0.250016	0.081	0.186	1
Pnrc2	6.8139e-05	-0.330151	0.246	0.391	1
Rnf113a2	7.20669e-05	-0.256293	0.031	0.112	1
Cd101	7.3046e-05	-0.673496	0.062	0.136	1
Dhrs1	9.6742e-05	0.339515	0.265	0.215	1
Sgms1	0.000103465	-0.311713	0.135	0.251	1
Usp39	0.000108223	0.29539	0.346	0.244	1
Cd274	0.000108623	-0.254792	0.065	0.15	1
Ppt1	0.000108962	-0.534419	0.658	0.684	1
Chrac1	0.000114619	-0.301272	0.138	0.261	1
Araf	0.000117342	-0.31658	0.119	0.234	1
Irgm1	0.000122716	-0.394345	0.262	0.35	1
H2-T24	0.000127097	-0.329432	0.412	0.546	1
Cmpk1	0.000137847	-0.270861	0.308	0.447	1
Il10rb	0.000144573	-0.443506	0.231	0.368	1
Inpp5d	0.000148765	-0.25694	0.446	0.582	1
Lyl1	0.000157671	-0.281685	0.404	0.55	1
Rgs18	0.000160344	0.274554	0.435	0.332	1
Snx27	0.0001618	-0.277332	0.227	0.35	1
Lamtor1	0.000162375	-0.275954	0.327	0.472	1
Vim	0.000162568	-0.370067	0.869	0.775	1
Use1	0.000173382	-0.269476	0.185	0.314	1
Sra1	0.000178782	-0.31244	0.127	0.243	1
Socs3	0.000181191	-0.573782	0.054	0.124	1
Hcst	0.000191676	0.331419	0.308	0.197	1
Ly96	0.000195503	-0.285283	0.073	0.166	1
Pira7	0.0001983	0.272566	0.531	0.453	1
Gpx4	0.000199018	-0.350055	0.392	0.537	1
Gm1821	0.000201213	-0.276436	0.992	0.999	1
Sell	0.000204363	-0.569552	0.85	0.804	1
Cd84	0.00021391	-0.401753	0.7	0.677	1
Ifngr2	0.000216045	-0.460536	0.546	0.66	1
Dhrs3	0.000216885	-0.438143	0.438	0.571	1
BC028528	0.000217011	-0.283398	0.185	0.308	1
Rnf114	0.000223087	-0.323206	0.315	0.457	1
Lamtor3	0.000238482	-0.333616	0.15	0.268	1
Cd81	0.000266875	0.338638	0.504	0.367	1
Rara	0.000288912	-0.397335	0.338	0.475	1
Ear10	0.000313568	-1.15033	0.477	0.477	1
Arrdc1	0.000350538	-0.331453	0.25	0.382	1
Csnk1d	0.000363237	-0.314893	0.181	0.285	1
Iscu	0.000370299	-0.339606	0.254	0.386	1
Taf12	0.000374505	-0.288328	0.112	0.218	1
Orm1	0.000395286	0.348846	0.2	0.107	1
Sc4mol	0.000397362	0.288311	0.281	0.184	1
Relt	0.000400227	-0.442129	0.169	0.267	1
Hmox1	0.000412011	-0.72597	0.115	0.219	1
Whsc1l1	0.000476639	-0.257343	0.554	0.685	1
Hist1h4i	0.000477678	-0.355321	0.112	0.21	1
Man2b1	0.000497546	-0.379619	0.727	0.819	1
Rasl11b	0.000512409	0.318425	0.131	0.076	1
Grn	0.000526754	-0.349916	0.515	0.618	1
Supt4a	0.000583954	-0.428002	0.25	0.377	1
AF251705	0.000611577	-0.559552	0.115	0.195	1
Irf7	0.000615951	-0.559871	0.192	0.29	1
Ric8	0.000625908	-0.324961	0.146	0.256	1
Cib1	0.000669599	-0.452751	0.181	0.287	1
Nfatc1	0.00067401	-0.254003	0.473	0.601	1
Tcn2	0.000699337	0.310472	0.581	0.471	1
Tstd3	0.000705341	-0.266687	0.188	0.261	1
Rab4b	0.000706228	0.276646	0.373	0.369	1
Gpr97	0.000737825	0.266834	0.369	0.25	1
Ctsd	0.000763889	-0.601811	0.731	0.822	1
Orai3	0.000767237	-0.293759	0.096	0.19	1
Rab32	0.000800998	-0.302314	0.462	0.59	1
Ear6	0.000823874	-1.65069	0.4	0.452	1
Btg2	0.000825031	-0.66671	0.535	0.63	1
Plin2	0.000838335	-0.461755	0.442	0.546	1
Pisd-ps1	0.000849307	-0.259924	0.196	0.308	1
2019-03-01	0.000858298	-0.27758	0.377	0.331	1
Dnajb6	0.000913872	-0.307091	0.258	0.382	1
Xab2	0.000959443	-0.337016	0.162	0.272	1
Psme2	0.000974527	-0.311602	0.427	0.536	1
Zbp1	0.000982915	-0.279472	0.077	0.163	1
Apoe	0.000997285	-1.4374	0.081	0.149	1
Psmb3	0.00102423	-0.251893	0.335	0.464	1
Raf1	0.00112754	-0.534764	0.408	0.52	1
Aga	0.00122073	-0.284887	0.05	0.117	1
Raly	0.00122973	-0.338093	0.365	0.481	1
Csf3r	0.00124423	-0.890884	0.873	0.892	1
Ndufb9	0.00127023	-0.313553	0.285	0.409	1
Ssh2	0.00128067	-0.254565	0.442	0.556	1
Smpdl3a	0.00129982	-0.47264	0.458	0.584	1
Taldo1	0.00132364	-0.328025	0.896	0.924	1
Ergic2	0.00135695	-0.256045	0.15	0.249	1
Hist1h4m	0.0013723	-0.276551	0.1	0.191	1
Lipe	0.00146918	-0.325851	0.131	0.224	1
Cdk2ap2	0.0017462	-0.612193	0.731	0.791	1
Paip2	0.00190031	-0.296311	0.312	0.43	1
Entpd1	0.00192107	-0.57812	0.308	0.377	1
Akt1	0.0020334	-0.328782	0.127	0.219	1
Ak2	0.00207449	0.293572	0.619	0.536	1
Atp6v1b2	0.00221405	-0.330408	0.492	0.596	1
Hsdl1	0.00227819	-0.253522	0.162	0.26	1
Capza2	0.00257652	-0.324989	0.623	0.686	1
Prkcd	0.00279303	-0.407064	0.546	0.624	1
Id2	0.00288593	0.25496	0.346	0.244	1
Stk17b	0.00295382	-0.449002	0.481	0.514	1
Yipf1	0.00311364	-0.273213	0.1	0.184	1
Ifi27l2a	0.00317432	-0.506966	0.365	0.474	1
Rnf181	0.00329379	-0.258215	0.288	0.403	1
Plekho2	0.00356303	-0.252687	0.3	0.415	1
Bcl2a1b	0.00366528	-0.611255	0.088	0.147	1
Lsp1	0.00394982	-0.292082	0.935	0.871	1
Msrb2	0.00435359	0.268001	0.115	0.061	1
Fbxl5	0.00474571	-0.450695	0.438	0.552	1
Ctsh	0.00480164	-0.300227	0.442	0.552	1
Fcgr4	0.00518695	-0.783295	0.173	0.173	1
Ccr1	0.0053477	-0.545328	0.481	0.416	1
Tnfrsf18	0.00600724	0.454873	0.115	0.07	1
Prg2	0.00619999	-3.90321	0.096	0.126	1
Rbms1	0.00726565	-0.306587	0.385	0.475	1
Arl6ip1	0.00752678	-0.2847	0.554	0.614	1
Acta2	0.00762286	-0.500592	0.092	0.123	1
N4bp2l1	0.0077766	-0.276547	0.112	0.19	1
Atg3	0.00782894	-0.415268	0.438	0.53	1
Tpm4	0.00787459	-0.444528	0.477	0.548	1
Ypel3	0.00790402	-0.254258	0.131	0.212	1
Gdi2	0.00794936	-0.260151	0.569	0.666	1
Herc4	0.00813977	-0.253918	0.246	0.321	1
Adrbk1	0.0087485	-0.25137	0.488	0.591	1
Grina	0.0092055	-0.296725	0.623	0.519	1
Tnfsf14	0.00980403	-0.52276	0.065	0.13	1
Isg15	0.010116	-0.433896	0.073	0.131	1
Ifit3	0.0105806	-0.835303	0.065	0.107	1
Evi2a	0.0107422	-0.418298	0.435	0.475	1
Trim30b	0.0110412	-0.294865	0.112	0.154	1
Niacr1	0.0112959	-0.832929	0.085	0.126	1
Ubc	0.0114784	-0.459536	0.731	0.797	1
Prkar1a	0.0120831	-0.253265	0.569	0.655	1
Klra17	0.0128179	-0.358447	0.054	0.111	1
Fas	0.0134414	-0.56448	0.135	0.195	1
Srsf5	0.0137299	-0.281294	0.735	0.785	1
Mbp	0.013792	-0.268266	0.242	0.337	1
Rtp4	0.014266	-0.544152	0.181	0.23	1
Nudt7	0.0159768	0.25933	0.127	0.088	1
Map1lc3b	0.0176304	-0.266293	0.673	0.762	1
Rab8a	0.0198895	-0.283539	0.496	0.59	1
Phyh	0.0227014	-0.305283	0.254	0.344	1
Csf2ra	0.0231184	-0.250982	0.708	0.762	1
Sirt7	0.0234929	-0.268383	0.365	0.46	1
Snap23	0.0251758	-0.443552	0.281	0.358	1
Il1f9	0.0252389	-0.555544	0.454	0.412	1
Il17ra	0.0255828	-0.389256	0.585	0.671	1
Neurl3	0.0257195	-0.333997	0.762	0.825	1
Tmem120a	0.026225	0.273608	0.192	0.149	1
Cyb5r1	0.0266061	-0.276742	0.215	0.299	1
Sgk1	0.0274931	-0.313493	0.154	0.23	1
Atp6ap1	0.0279223	-0.290973	0.442	0.537	1
Cxcl2	0.0293484	-0.288352	0.069	0.117	1
2019-03-07	0.0303786	-0.270008	0.162	0.222	1
Tmem123	0.0315947	-0.279333	0.227	0.31	1
Ifrd1	0.0319675	0.26439	0.277	0.225	1
Zyx	0.0355166	-0.299148	0.896	0.865	1
Ear3	0.0359808	-0.407087	0.092	0.118	1
Tsc22d3	0.0364625	-0.329001	0.354	0.424	1
Ear12	0.0369256	-0.441248	0.092	0.118	1
Ubap1	0.0414305	-0.329287	0.154	0.225	1
Tgfbr2	0.0449902	-0.282228	0.162	0.227	1
4930470H14Rik	0.0451685	-0.352428	0.846	0.88	1
Neat1	0.0463912	-0.37736	0.573	0.655	1
Gcnt2	0.0483306	-0.321096	0.162	0.214	1
Cmtm7	0.0492085	-0.261939	0.531	0.593	1
Plek	0.0499021	-0.474416	0.388	0.442	1
Tbc1d14	0.0533501	-0.258317	0.077	0.129	1
Ddit3	0.0548253	-0.281903	0.085	0.138	1
Rap1b	0.0606103	-0.256781	0.381	0.464	1
Serp1	0.0668019	-0.323866	0.604	0.674	1
Txnip	0.0742744	-0.327423	0.262	0.333	1
Klf6	0.0786262	-0.332427	0.638	0.655	1
Ip6k1	0.0847183	-0.324771	0.262	0.331	1
Csprs	0.0882654	-0.294077	0.362	0.373	1
Oasl2	0.0905032	-0.439625	0.169	0.221	1
Slc16a3	0.0907589	-0.436164	0.462	0.486	1
Adrb2	0.095265	-0.387629	0.362	0.343	1
Msn	0.0969448	-0.301187	0.808	0.827	1
Hmha1	0.0983421	-0.31471	0.796	0.843	1
Hist1h1c	0.122354	-0.274065	0.531	0.588	1
Cd44	0.165402	-0.292586	0.708	0.74	1
Itgal	0.172359	-0.369782	0.6	0.617	1
Stk10	0.223402	-0.327978	0.608	0.642	1
Tyrobp	0.233765	-0.295898	0.965	0.966	1
Ptprc	0.276489	-0.300425	0.931	0.945	1
Stfa2l1	0.283465	-0.277263	0.069	0.101	1
Slfn2	0.31323	-0.258323	0.796	0.756	1
Gpcpd1	0.318332	-0.26825	0.331	0.369	1
Dhrs9	0.324605	-0.252896	0.127	0.127	1
Gm13363	0.353145	-0.283644	0.592	0.588	1
Sqstm1	0.370297	-0.324782	0.612	0.645	1
Txnl4b	0.381002	-0.261392	0.35	0.398	1
Cd300lb	0.416402	-0.294353	0.388	0.433	1
Ptpn6	0.477963	-0.269196	0.808	0.839	1
Gapt	0.480618	-0.26333	0.388	0.43	1
Arg2	0.537666	-0.360909	0.1	0.109	1
Ccpg1	0.579775	-0.429625	0.615	0.599	1
Nfkbia	0.693891	-0.346719	0.604	0.596	1
D1Ertd622e	0.757155	-0.265154	0.4	0.421	1
Arhgap25	0.894941	-0.305931	0.308	0.322	1
Samsn1	0.939138	-0.251309	0.442	0.45	1

## Sheet: C2 FindMarkers
Supplementary Table 5G: FindMarkers output for C2
ID	p_val	avg_logFC	pct.1	pct.2	p_val_adj
F13a1	6.37062e-203	2.63825	0.917	0.198	1.08052e-198
Pglyrp1	2.05211e-192	-2.82118	0.439	0.937	3.48058e-188
Ctsc	2.51009e-183	2.2431	0.945	0.188	4.25736e-179
Ly6c2	2.40864e-181	2.3783	0.854	0.666	4.08529e-177
Crip1	6.56211e-178	2.45044	0.925	0.123	1.113e-173
Lgals1	3.05627e-172	2.41461	0.921	0.168	5.18375e-168
Ccr2	1.14389e-167	1.56225	0.921	0.248	1.94015e-163
S100a9	1.21621e-167	-4.47358	0.486	0.931	2.06281e-163
Mndal	1.60148e-167	1.42717	0.964	0.113	2.71627e-163
Tmsb10	1.00399e-161	1.96436	1	0.486	1.70288e-157
S100a10	2.3737e-157	2.30356	0.881	0.095	4.02603e-153
Ms4a6c	5.72076e-156	1.69637	0.98	0.418	9.70299e-152
S100a8	3.64103e-155	-4.33376	0.605	0.93	6.17555e-151
Ms4a4c	1.36396e-153	1.72001	0.874	0.11	2.31341e-149
Ifi204	6.73849e-148	0.588295	0.85	0.043	1.14292e-143
Ahnak	1.53924e-142	0.642236	0.893	0.099	2.6107e-138
Fn1	8.55795e-135	1.42262	0.787	0.112	1.45151e-130
Pld4	7.01588e-132	1.4449	0.976	0.234	1.18996e-127
Ly6c1	7.10944e-121	1.69441	0.842	0.647	1.20583e-116
Rassf4	1.83789e-120	0.691231	0.937	0.168	3.11725e-116
Ms4a6d	4.50405e-117	1.40577	0.85	0.116	7.63933e-113
Prdx1	1.0999e-115	1.48084	0.925	0.308	1.86554e-111
Ly86	1.25273e-115	1.44058	0.81	0.085	2.12476e-111
Rps26	2.9634e-115	1.44857	0.996	0.573	5.02623e-111
Rpl3	1.85069e-114	1.5357	0.996	0.557	3.13895e-110
Rnd3	8.72634e-114	0.893718	0.719	0.041	1.48008e-109
Ctss	3.30044e-112	1.36432	0.968	0.271	5.59788e-108
Npc2	8.76878e-112	1.28992	0.972	0.411	1.48727e-107
Ifi30	1.14784e-108	1.44789	0.7	0.055	1.94685e-104
Dpysl2	1.84801e-108	0.898291	0.838	0.153	3.13442e-104
Rplp0	2.97129e-108	1.44705	1	0.715	5.03961e-104
Tifab	4.28938e-108	0.974312	0.858	0.156	7.27521e-104
Ctsz	1.15539e-107	1.48917	0.968	0.477	1.95966e-103
Nme2	5.6408e-104	1.3755	0.802	0.126	9.56736e-100
Rps5	2.73093e-102	1.40252	1	0.577	4.63193e-98
Rpl41	3.8091e-101	1.30746	0.992	0.535	6.46061e-97
Ifi203	4.86425e-100	0.318303	0.909	0.201	8.25025e-96
Ms4a6b	5.70189e-100	1.03476	0.814	0.112	9.67098e-96
H2-DMa	1.18242e-99	1.30973	0.688	0.063	2.0055e-95
Eef1a1	1.9677e-98	1.41678	0.992	0.708	3.33742e-94
Irf8	9.85059e-98	1.1122	0.779	0.129	1.67076e-93
Mrgpra2b	9.54761e-97	-2.71106	0.107	0.743	1.61937e-92
Rps28	1.57644e-95	1.24403	0.98	0.485	2.67379e-91
Rps18	6.94602e-94	1.30671	0.972	0.436	1.17811e-89
Rpl35	7.23127e-94	1.24732	0.976	0.43	1.2265e-89
Erp29	1.26339e-93	1.3463	0.909	0.302	2.14284e-89
Irf5	1.77879e-92	1.15703	0.874	0.21	3.01701e-88
Capn2	2.01109e-92	0.884916	0.723	0.076	3.411e-88
Rps6	5.61524e-92	1.21766	0.984	0.638	9.52401e-88
Rpl5	6.19767e-92	1.14376	0.96	0.44	1.05119e-87
Rps8	7.2451e-92	1.26184	0.988	0.611	1.22884e-87
Itgb7	3.09134e-91	1.38436	0.806	0.168	5.24322e-87
Rps2	1.39017e-90	1.40481	0.941	0.431	2.35787e-86
Ccl9	3.24585e-90	0.903566	0.826	0.333	5.50529e-86
Emp1	3.58048e-90	0.402261	0.542	0.013	6.07285e-86
Mrgpra2a	5.67678e-90	-1.60606	0.166	0.766	9.62838e-86
Rps19	1.07497e-89	1.1703	0.992	0.504	1.82325e-85
Rpl4	1.70081e-89	1.23698	0.984	0.559	2.88474e-85
Psap	2.44207e-89	1.35189	1	0.901	4.14199e-85
Slc25a4	2.15696e-88	1.28412	0.64	0.079	3.65842e-84
Rps4x	7.2794e-88	1.2361	0.988	0.632	1.23466e-83
Rpl13	7.53983e-88	1.24697	0.98	0.594	1.27883e-83
Rpl10a	1.60541e-87	1.20774	0.913	0.277	2.72294e-83
Rpl6	3.48787e-87	1.18017	0.988	0.619	5.91577e-83
Capg	6.0962e-87	1.41698	0.656	0.073	1.03398e-82
Rpl28	2.5646e-86	1.21336	0.972	0.495	4.34981e-82
Rpl32	6.36829e-86	1.18797	0.949	0.381	1.08013e-81
Hspa8	7.2148e-86	1.26913	1	0.791	1.2237e-81
Rpl14	3.1485e-85	1.14623	0.96	0.424	5.34017e-81
Lrg1	9.95021e-85	-2.83215	0.134	0.725	1.68766e-80
Hint1	2.93193e-84	1.24972	0.81	0.193	4.97284e-80
Rps3a1	3.37857e-84	1.10517	0.984	0.514	5.73039e-80
Rps11	5.85472e-84	1.1537	0.976	0.487	9.93018e-80
Gm15772	4.24064e-83	1.12782	0.976	0.479	7.19254e-79
Ngp	4.69952e-83	-4.86494	0.49	0.837	7.97086e-79
Vim	5.17767e-83	1.35109	0.968	0.746	8.78184e-79
Rpl10	5.21989e-83	1.21624	0.988	0.721	8.85345e-79
Rpl18a	2.28144e-82	1.02039	0.996	0.667	3.86955e-78
Eef2	2.40787e-82	1.18022	0.992	0.664	4.08398e-78
Uba52	2.81333e-82	1.11615	1	0.604	4.77169e-78
Rpl19	6.91183e-82	1.24142	0.933	0.429	1.17232e-77
Rps17	1.05212e-81	1.22166	0.957	0.43	1.7845e-77
Rps15a-ps6	4.97552e-81	0.61037	0.976	0.411	8.43898e-77
1100001G20Rik	7.79241e-81	-2.53286	0.079	0.642	1.32167e-76
Vcan	9.29396e-81	0.470217	0.494	0.013	1.57635e-76
Mxd1	2.52738e-80	-1.98521	0.277	0.822	4.28669e-76
Anxa5	1.63837e-79	1.16607	0.921	0.371	2.77884e-75
Sod1	1.90162e-79	1.27461	0.901	0.342	3.22534e-75
Rpl39	2.10311e-79	1.21056	0.874	0.271	3.56708e-75
Rps15a-ps4	1.23714e-78	0.562857	0.96	0.417	2.09832e-74
Rps20	4.99839e-78	1.22842	0.858	0.28	8.47777e-74
Hsp90b1	7.46706e-78	1.15889	0.937	0.472	1.26649e-73
Rps13	8.5067e-78	1.08548	0.976	0.529	1.44282e-73
Rps7	1.2412e-77	1.01197	0.976	0.51	2.1052e-73
Trex1	2.06292e-77	1.05884	0.802	0.176	3.49891e-73
Rpl37a	2.13061e-77	0.951074	0.988	0.497	3.61374e-73
Mpeg1	2.54183e-77	0.883947	0.913	0.294	4.31121e-73
Psma7	2.67424e-77	1.19844	0.925	0.417	4.53578e-73
Lcn2	3.74936e-77	-3.66891	0.285	0.735	6.35928e-73
Tmem109	6.71565e-77	0.962061	0.597	0.05	1.13904e-72
Rpl11	1.08463e-76	1.10703	0.968	0.498	1.83964e-72
Lat2	1.44662e-76	1.00399	0.711	0.113	2.45361e-72
Rpl37	1.52577e-76	0.830719	0.98	0.487	2.58786e-72
Mmp9	1.58678e-76	-2.53005	0.17	0.704	2.69134e-72
Rpl36a	8.53677e-76	1.04473	0.885	0.265	1.44792e-71
Rpl38	1.0191e-75	0.942817	0.933	0.33	1.72849e-71
C1galt1c1	1.04395e-75	1.18868	0.589	0.082	1.77064e-71
Rpl15	1.0842e-75	0.965158	0.929	0.441	1.83892e-71
Akr1a1	1.31497e-75	1.15156	0.905	0.372	2.23031e-71
Retnlg	1.64793e-75	-3.90533	0.281	0.758	2.79505e-71
Fkbp1a	3.78712e-75	0.918252	0.628	0.079	6.42334e-71
Rps16	9.5372e-75	1.1117	0.937	0.414	1.6176e-70
Prdx4	1.62369e-74	1.02767	0.502	0.031	2.75394e-70
Rpl24	4.73227e-74	0.970918	0.968	0.447	8.02641e-70
Rpl7	1.75069e-73	1.02147	0.98	0.598	2.96934e-69
Rps29	2.435e-73	0.92367	0.988	0.541	4.13001e-69
Naca	5.28243e-73	0.983635	0.964	0.478	8.95954e-69
Rpl8	6.63901e-73	1.06783	0.976	0.605	1.12604e-68
Rps15a	8.32824e-73	0.327921	0.984	0.558	1.41255e-68
Gm5424	1.22764e-72	1.33015	0.668	0.175	2.0822e-68
Slc25a5	1.32268e-72	1.17463	0.972	0.639	2.2434e-68
Rps23	1.33183e-72	0.984584	0.96	0.474	2.25892e-68
Cd68	1.8551e-72	0.628334	0.862	0.237	3.14643e-68
Rpl21	1.05139e-71	0.853148	0.945	0.44	1.78327e-67
Ppib	1.36055e-71	1.06766	0.889	0.349	2.30762e-67
Rap2b	2.93537e-71	0.37237	0.945	0.373	4.97869e-67
AI607873	8.23615e-71	0.591552	0.593	0.06	1.39693e-66
Sdf2l1	1.18359e-70	1.22834	0.739	0.174	2.00749e-66
Msr1	2.06842e-70	0.799053	0.47	0.024	3.50824e-66
Camp	2.25439e-70	-4.44227	0.265	0.698	3.82367e-66
Rps14	3.14095e-70	0.934346	0.992	0.605	5.32736e-66
Eif4a1	6.78657e-70	1.00486	0.96	0.52	1.15107e-65
Atp5g2	9.49772e-70	0.998334	0.909	0.373	1.61091e-65
Cd24a	2.86675e-69	-2.02031	0.427	0.821	4.86229e-65
Ccdc109b	3.44293e-69	0.924913	0.415	0.018	5.83955e-65
Dusp3	5.72712e-69	0.533648	0.783	0.197	9.71376e-65
Slc25a3	1.39431e-68	1.10032	0.893	0.442	2.3649e-64
Hsp90ab1	1.46293e-68	1.06012	0.96	0.621	2.48128e-64
Rps3	1.55931e-68	0.818991	0.976	0.549	2.64475e-64
Rpl23	1.5728e-68	0.897461	0.941	0.544	2.66763e-64
Ptma	1.91362e-68	1.11486	0.98	0.578	3.24569e-64
Gnb2l1	2.43078e-68	1.08547	0.838	0.288	4.12285e-64
Rpl36al	5.56676e-67	1.10536	0.771	0.205	9.44179e-63
Cmtm3	6.48212e-67	0.765445	0.569	0.061	1.09943e-62
Fam105a	4.44743e-66	0.773759	0.723	0.16	7.54329e-62
Rpl29	1.17037e-65	1.03205	0.925	0.492	1.98507e-61
Rpl13a	2.03327e-65	0.869044	0.937	0.465	3.44864e-61
Fam96a	2.62298e-65	1.03113	0.81	0.297	4.44884e-61
Canx	2.73045e-65	0.801682	0.909	0.402	4.63112e-61
Rplp1	3.63223e-65	0.998662	0.826	0.247	6.16062e-61
Rps24	6.13681e-65	0.831987	0.964	0.492	1.04086e-60
Ptpro	6.31523e-65	0.561821	0.553	0.054	1.07113e-60
Prdx2	1.08765e-64	1.02434	0.549	0.057	1.84477e-60
Ppia	1.34156e-64	1.13639	0.984	0.664	2.27543e-60
Adpgk	1.58201e-64	-2.09732	0.364	0.726	2.68326e-60
Rasa4	2.30528e-64	0.732953	0.557	0.061	3.90998e-60
Pdia6	8.49459e-64	1.0081	0.735	0.195	1.44077e-59
Zeb2	1.19245e-63	0.264444	0.763	0.182	2.02251e-59
Itm2c	1.60222e-63	0.553349	0.719	0.15	2.71753e-59
Il6ra	2.61471e-63	0.429433	0.901	0.322	4.43481e-59
Atp5a1	3.48136e-63	1.00006	0.905	0.442	5.90473e-59
Npm1	3.8316e-63	1.12147	0.798	0.271	6.49878e-59
Scpep1	4.52644e-63	0.81094	0.593	0.083	7.67729e-59
Pycard	4.78383e-63	0.795327	0.759	0.217	8.11386e-59
Gpr114	1.25268e-62	0.728371	0.522	0.048	2.12467e-58
Ppfia4	1.41894e-62	0.443798	0.51	0.042	2.40666e-58
Sepw1	1.74027e-62	0.635187	0.719	0.154	2.95167e-58
Ass1	2.31341e-62	0.73427	0.593	0.087	3.92378e-58
H2-DMb1	2.80044e-62	1.23365	0.605	0.108	4.74982e-58
Rpl27a	3.51089e-62	0.759319	0.905	0.371	5.95483e-58
Ehd4	9.46275e-62	0.529159	0.735	0.17	1.60498e-57
Ifi202b	1.08133e-61	0.499967	0.435	0.018	1.83405e-57
Snx5	1.8808e-61	0.83385	0.711	0.166	3.19003e-57
Ctsa	6.64303e-61	0.665728	0.941	0.448	1.12672e-56
Rpl17	1.10528e-60	0.904956	0.972	0.604	1.87466e-56
Tubb5	1.24014e-60	1.01692	0.988	0.695	2.1034e-56
Gm8580	2.19412e-60	0.4611	0.921	0.428	3.72144e-56
Cd9	2.3814e-60	-1.79669	0.138	0.676	4.0391e-56
Rpsa	2.55015e-60	0.971605	0.889	0.381	4.32531e-56
Cd48	2.61949e-60	0.906044	0.727	0.175	4.44291e-56
Tmem173	3.04238e-60	0.701628	0.534	0.062	5.16018e-56
Itga1	5.15499e-60	0.278289	0.407	0.013	8.74338e-56
Hdc	1.12997e-58	-1.64312	0.166	0.677	1.91654e-54
Eef1g	1.1415e-58	0.946867	0.818	0.298	1.93609e-54
Clta	2.00611e-58	0.869423	0.905	0.395	3.40257e-54
Tubb2a	2.31042e-58	0.915646	0.423	0.031	3.91871e-54
Unc93b1	3.35378e-58	0.899108	0.937	0.527	5.68834e-54
Hpse	6.72679e-58	0.672876	0.49	0.055	1.14093e-53
Rpl22	1.14349e-57	0.34668	0.755	0.203	1.93948e-53
Rpn2	1.15968e-57	0.966657	0.794	0.297	1.96693e-53
P4hb	1.407e-57	1.03218	0.913	0.517	2.38642e-53
Gm2a	1.55774e-57	0.535866	0.992	0.578	2.64209e-53
Rpl18	1.73281e-57	0.846112	0.885	0.359	2.93901e-53
Psmb8	2.19866e-57	0.852702	0.858	0.335	3.72915e-53
Anxa6	2.27118e-57	0.737851	0.759	0.219	3.85215e-53
Ddost	2.34915e-57	0.908938	0.818	0.315	3.98439e-53
Bax	4.04418e-57	0.760904	0.715	0.172	6.85934e-53
Rplp2	4.20524e-57	0.904088	0.838	0.315	7.1325e-53
Txndc5	9.81535e-57	0.791173	0.466	0.044	1.66478e-52
Rgs10	1.02045e-56	0.846438	0.478	0.042	1.73079e-52
Btf3	1.08135e-56	0.864991	0.901	0.415	1.83407e-52
Plac8	1.98615e-56	1.10196	0.905	0.453	3.36871e-52
Glud1	2.06958e-56	0.777741	0.905	0.43	3.51022e-52
Rpl26	2.52715e-56	0.718426	0.743	0.195	4.2863e-52
Pdlim1	3.9115e-56	0.772424	0.407	0.02	6.63429e-52
Eif3f	4.15943e-56	0.748092	0.957	0.503	7.05482e-52
Cox4i1	4.30004e-56	0.870396	0.96	0.566	7.2933e-52
Slc39a1	4.53564e-56	0.358171	0.925	0.41	7.69291e-52
Slfn4	5.40267e-56	-1.98887	0.265	0.727	9.16347e-52
Limd1	5.41524e-56	0.356698	0.593	0.095	9.18479e-52
Map3k1	1.05484e-55	0.315682	0.968	0.473	1.78911e-51
H2-DMb2	1.08324e-55	0.753856	0.589	0.094	1.83729e-51
Rpl9	1.14984e-55	0.829625	0.98	0.636	1.95024e-51
Pdia3	1.79837e-55	0.922266	0.87	0.431	3.05022e-51
Plxnb2	2.049e-55	0.346749	0.621	0.113	3.4753e-51
Sub1	2.40703e-55	0.455874	0.909	0.416	4.08256e-51
Elmo2	2.58183e-55	0.626517	0.85	0.356	4.37904e-51
Cd302	2.70176e-55	0.67268	0.502	0.054	4.58245e-51
Snrpb	3.04621e-55	0.982513	0.846	0.353	5.16668e-51
Set	3.09502e-55	0.739677	0.866	0.358	5.24947e-51
Esyt1	3.1478e-55	0.795528	0.68	0.203	5.33899e-51
Cct5	3.42119e-55	0.954166	0.791	0.293	5.80267e-51
Snx2	3.97089e-55	0.831854	0.696	0.181	6.73502e-51
Ltf	5.53192e-55	-4.20584	0.399	0.744	9.38269e-51
Rpl35a	7.71754e-55	0.773115	0.949	0.51	1.30897e-50
Rpl34-ps1	7.81217e-55	0.87343	0.85	0.311	1.32502e-50
Slc2a3	1.00195e-54	-1.55589	0.087	0.591	1.69941e-50
Cdk4	1.04696e-54	1.06283	0.684	0.205	1.77576e-50
Gltscr2	1.49056e-54	0.719192	0.85	0.317	2.52814e-50
Rps25	1.74979e-54	0.810362	0.905	0.443	2.96781e-50
Pid1	4.72877e-54	0.553091	0.593	0.114	8.02047e-50
Rps15	6.10709e-54	0.876935	0.787	0.254	1.03582e-49
Tuba1b	6.98704e-54	1.23046	0.889	0.476	1.18507e-49
Fh1	8.84616e-54	0.880219	0.545	0.098	1.5004e-49
Coro1b	8.8645e-54	0.695852	0.937	0.468	1.50351e-49
Naaa	1.87834e-53	0.697131	0.565	0.114	3.18586e-49
Lrpap1	2.23848e-53	0.622538	0.64	0.144	3.79669e-49
Eef1d	2.31986e-53	0.729242	0.739	0.219	3.93472e-49
Mfsd1	2.89981e-53	0.68067	0.719	0.203	4.91837e-49
Ugt1a7c	3.7616e-53	0.35649	0.66	0.15	6.38005e-49
Eif3i	3.82209e-53	0.975702	0.628	0.148	6.48264e-49
Pomp	7.52402e-53	0.815446	0.771	0.251	1.27615e-48
Ahcy	9.34399e-53	0.794849	0.545	0.111	1.58483e-48
Sdhb	1.32948e-52	0.912149	0.779	0.273	2.25492e-48
Snd1	1.45452e-52	0.526055	0.731	0.209	2.46701e-48
Sec61a1	3.65641e-52	0.813183	0.87	0.434	6.20164e-48
Nme1	3.97737e-52	0.812099	0.648	0.162	6.74601e-48
Arl6ip5	4.825e-52	0.575789	0.87	0.344	8.18368e-48
Rexo2	5.19673e-52	0.824662	0.64	0.143	8.81418e-48
Ly6f	1.17225e-51	-0.48489	0.427	0.621	1.98825e-47
Rbm3	4.40186e-51	0.867442	0.889	0.482	7.46599e-47
Hopx	4.63332e-51	0.618267	0.561	0.094	7.85857e-47
Cct4	1.46246e-50	0.795278	0.743	0.242	2.48048e-46
Rpl27	1.73676e-50	0.741491	0.866	0.38	2.94572e-46
Atp5o	2.05168e-50	0.989891	0.763	0.28	3.47986e-46
Cstb	4.18049e-50	0.582244	0.688	0.178	7.09052e-46
Emilin2	4.36824e-50	0.317032	0.806	0.281	7.40897e-46
H2afy	5.5478e-50	0.679866	0.866	0.433	9.40962e-46
Eif2s2	5.90984e-50	0.45113	0.802	0.288	1.00237e-45
Tm9sf4	7.29267e-50	0.388167	0.877	0.366	1.23691e-45
Eif3e	8.57522e-50	0.62495	0.66	0.16	1.45444e-45
Dbi	9.39834e-50	0.86589	0.727	0.216	1.59405e-45
Psmb10	9.68658e-50	0.752305	0.625	0.142	1.64294e-45
Acer3	1.29337e-49	0.331585	0.751	0.231	2.19368e-45
Fam129b	1.51261e-49	0.366226	0.336	0.012	2.56554e-45
Pepd	1.90339e-49	0.788231	0.514	0.08	3.22834e-45
Tcof1	2.69749e-49	0.31382	0.577	0.108	4.57521e-45
Gatm	4.74969e-49	0.766888	0.791	0.294	8.05595e-45
Alox5	5.6559e-49	-1.38937	0.209	0.67	9.59298e-45
Rpl7a	7.80899e-49	0.819025	0.854	0.393	1.32448e-44
Atp5b	1.00928e-48	0.912684	0.881	0.495	1.71183e-44
Parp1	1.96215e-48	0.466368	0.538	0.092	3.32801e-44
Cd33	1.97979e-48	-1.77631	0.348	0.728	3.35793e-44
Shisa5	2.03405e-48	0.521922	0.913	0.43	3.44996e-44
Ssr1	2.04909e-48	0.519487	0.968	0.784	3.47546e-44
Eif3k	2.33824e-48	0.805967	0.826	0.337	3.96589e-44
Scarb1	2.69922e-48	0.734501	0.684	0.2	4.57815e-44
Pdcd4	2.7144e-48	0.311592	0.921	0.433	4.60389e-44
Gm12191	2.84718e-48	0.729421	0.779	0.269	4.8291e-44
Dusp22	2.89319e-48	0.775188	0.597	0.259	4.90713e-44
Lrrc33	3.51627e-48	0.642721	0.87	0.411	5.96395e-44
Ifi27l2a	3.64584e-48	0.693468	0.842	0.329	6.18371e-44
Tpt1	4.0451e-48	0.680413	0.937	0.509	6.8609e-44
Map4k1	4.75357e-48	0.563235	0.64	0.159	8.06253e-44
2700060E02Rik	4.83776e-48	0.697316	0.64	0.157	8.20533e-44
Snrpf	5.29973e-48	0.618016	0.64	0.166	8.98887e-44
Hspa5	5.99946e-48	0.98663	0.913	0.548	1.01757e-43
Ywhae	8.67802e-48	0.576705	0.885	0.418	1.47188e-43
Atp5c1	1.60452e-47	0.835201	0.874	0.468	2.72142e-43
Impdh2	3.46693e-47	0.945328	0.636	0.193	5.88026e-43
2700094K13Rik	3.66019e-47	0.894571	0.581	0.141	6.20805e-43
Cndp2	5.88953e-47	0.668003	0.66	0.173	9.98924e-43
Uqcrc1	6.24169e-47	0.783326	0.838	0.366	1.05865e-42
BC035044	6.28593e-47	0.626279	0.478	0.072	1.06616e-42
Cfp	6.74984e-47	0.918475	0.905	0.571	1.14484e-42
Mrpl4	7.38463e-47	0.687464	0.577	0.117	1.25251e-42
Mrpl54	9.19311e-47	0.631267	0.542	0.095	1.55924e-42
Atp5g1	1.01226e-46	0.839286	0.636	0.172	1.7169e-42
Eif3l	1.09265e-46	0.835687	0.704	0.23	1.85324e-42
Tmem106a	1.29394e-46	0.573838	0.407	0.035	2.19465e-42
Rps27l	1.68557e-46	0.741328	0.676	0.185	2.8589e-42
S100a4	1.77054e-46	0.733336	0.304	0.008	3.00301e-42
Cxcr2	2.0017e-46	-2.03608	0.953	0.969	3.39508e-42
Uqcrfs1	2.23457e-46	0.854723	0.739	0.267	3.79006e-42
Rrbp1	2.40691e-46	0.257413	0.822	0.317	4.08236e-42
Nupr1	3.00602e-46	0.440816	0.447	0.066	5.09851e-42
Gltp	3.15812e-46	0.711321	0.771	0.284	5.35649e-42
Ctsh	3.1618e-46	0.719894	0.877	0.42	5.36273e-42
Tgfbi	7.79909e-46	0.697307	0.798	0.313	1.3228e-41
Ndufa6	9.16804e-46	0.650423	0.826	0.325	1.55499e-41
Banf1	9.88165e-46	0.895329	0.719	0.248	1.67603e-41
Abca9	1.06212e-45	0.304738	0.356	0.023	1.80145e-41
Trem2	1.08569e-45	0.728681	0.304	0.012	1.84144e-41
Psmb1	1.16353e-45	0.781002	0.826	0.353	1.97346e-41
Fam69a	1.24287e-45	0.464879	0.478	0.067	2.10803e-41
Ece1	1.56489e-45	0.272924	0.431	0.051	2.65421e-41
Gusb	1.86089e-45	0.675693	0.688	0.207	3.15626e-41
Fcgr1	2.86106e-45	0.528179	0.375	0.026	4.85265e-41
Eif3h	3.50755e-45	0.76331	0.842	0.369	5.94916e-41
Park7	4.13682e-45	0.842181	0.735	0.26	7.01646e-41
Clec4a3	5.1008e-45	0.261279	0.64	0.173	8.65146e-41
Bst2	5.95604e-45	0.784276	0.474	0.067	1.0102e-40
Cox5b	6.72532e-45	0.830225	0.794	0.334	1.14068e-40
Plod3	1.0652e-44	0.512396	0.708	0.222	1.80669e-40
Pyhin1	1.25206e-44	0.482941	0.435	0.06	2.12362e-40
Xrn2	1.51665e-44	0.361425	0.668	0.188	2.5724e-40
Rbm7	1.84239e-44	0.417878	0.743	0.249	3.12487e-40
Padi4	1.846e-44	-1.43729	0.36	0.685	3.13099e-40
Sulf2	2.08853e-44	0.365353	0.391	0.033	3.54236e-40
Rps27a	2.28172e-44	0.68545	0.941	0.579	3.87003e-40
Mif	3.27443e-44	1.05511	0.545	0.116	5.55377e-40
Emb	3.38885e-44	0.423117	0.87	0.392	5.74783e-40
Insig1	3.76666e-44	0.549652	0.613	0.155	6.38863e-40
Nsf	3.83827e-44	0.433024	0.605	0.144	6.51009e-40
Erdr1	4.26496e-44	0.480199	0.787	0.292	7.2338e-40
Mapk13	4.63625e-44	-1.59383	0.059	0.478	7.86354e-40
Atp5d	4.88968e-44	0.789574	0.822	0.367	8.29339e-40
Psmd8	6.4975e-44	0.689612	0.715	0.244	1.10204e-39
Glrx3	6.71893e-44	0.485268	0.585	0.131	1.1396e-39
1500032L24Rik	8.24842e-44	0.794259	0.723	0.246	1.39901e-39
2019-09-05	1.01902e-43	-0.292247	0.016	0.414	1.72836e-39
Grn	1.02616e-43	0.736472	0.905	0.499	1.74048e-39
Trem3	1.08476e-43	-1.66719	0.32	0.634	1.83985e-39
Atox1	1.12559e-43	0.605972	0.696	0.212	1.90912e-39
Zfp706	1.34689e-43	0.462864	0.885	0.459	2.28446e-39
Gng10	1.40225e-43	0.618754	0.747	0.261	2.37836e-39
Anxa1	1.40323e-43	-2.18203	0.874	0.889	2.38002e-39
Ifngr1	1.72277e-43	0.477665	0.953	0.555	2.92199e-39
Cox6b1	3.75789e-43	0.718811	0.791	0.319	6.37375e-39
Aif1	4.64166e-43	0.902458	0.383	0.035	7.87272e-39
Cd300lf	5.96482e-43	-1.41795	0.356	0.738	1.01169e-38
Ccl2	6.26274e-43	1.09918	0.328	0.02	1.06222e-38
P2ry6	7.34273e-43	0.76609	0.391	0.041	1.2454e-38
Rpl22l1	8.57772e-43	0.710049	0.727	0.249	1.45487e-38
Atpif1	9.25502e-43	0.644751	0.759	0.275	1.56974e-38
Ran	9.63729e-43	0.808241	0.759	0.348	1.63458e-38
AI662270	1.4506e-42	0.585405	0.696	0.223	2.46037e-38
Idh1	1.61388e-42	0.553419	0.648	0.181	2.7373e-38
9030619P08Rik	1.66988e-42	-0.447365	0.407	0.617	2.83228e-38
Snrpg	1.67341e-42	0.713358	0.625	0.164	2.83826e-38
Gstp1	1.74869e-42	0.572002	0.767	0.282	2.96595e-38
Dad1	1.91576e-42	0.693332	0.759	0.282	3.24932e-38
Galnt9	1.94018e-42	0.735249	0.336	0.021	3.29073e-38
Krtcap2	1.98361e-42	0.775914	0.625	0.167	3.36439e-38
Mrpl42	1.99229e-42	0.913426	0.577	0.145	3.37912e-38
Zscan26	2.74848e-42	0.258376	0.763	0.306	4.6617e-38
Rpl31	2.78859e-42	0.499276	0.719	0.249	4.72974e-38
Napsa	3.07969e-42	0.717357	0.862	0.42	5.22345e-38
Psme2	3.58988e-42	0.799499	0.838	0.411	6.0888e-38
Pdia4	3.66784e-42	0.822865	0.569	0.144	6.22102e-38
Mrpl30	3.69534e-42	0.781654	0.561	0.132	6.26767e-38
M6pr	3.89994e-42	0.801527	0.731	0.285	6.61469e-38
Tmed9	4.22631e-42	0.670851	0.727	0.253	7.16824e-38
Ly6e	5.69159e-42	0.648451	0.98	0.845	9.65351e-38
Aldh9a1	6.24647e-42	0.598358	0.636	0.185	1.05946e-37
Faim	6.73208e-42	0.548668	0.439	0.058	1.14183e-37
Cdkn1a	7.88144e-42	0.568303	0.787	0.309	1.33677e-37
Plekho1	8.73742e-42	0.418336	0.324	0.017	1.48195e-37
Tifa	1.06002e-41	0.457765	0.474	0.076	1.7979e-37
Tspan31	1.11244e-41	0.656932	0.557	0.163	1.88681e-37
Cct8	1.46365e-41	0.630622	0.676	0.213	2.4825e-37
Mbnl1	1.70313e-41	0.495716	0.881	0.456	2.88867e-37
Rps10	1.76913e-41	0.733912	0.794	0.33	3.00062e-37
Lgmn	2.44716e-41	0.962322	0.486	0.083	4.15063e-37
Atf3	2.78484e-41	0.711246	0.47	0.079	4.72338e-37
Ndufa10	3.14479e-41	0.779267	0.632	0.188	5.33388e-37
Sec61b	3.7636e-41	0.714339	0.802	0.354	6.38345e-37
C330006A16Rik	5.02035e-41	0.579431	0.787	0.319	8.51502e-37
Swi5	7.68282e-41	0.724441	0.715	0.25	1.30308e-36
Ssr4	1.00062e-40	0.72626	0.7	0.241	1.69716e-36
Tor3a	1.33562e-40	0.457506	0.482	0.083	2.26534e-36
Psma3	1.52636e-40	0.687424	0.775	0.328	2.58886e-36
Ctsb	1.73169e-40	0.485795	0.98	0.678	2.93712e-36
Lin28a	1.8255e-40	-0.453923	0.028	0.42	3.09623e-36
Rps21	1.96746e-40	0.392547	0.565	0.133	3.33701e-36
Stom	2.45161e-40	0.575882	0.585	0.156	4.15818e-36
Ndufs2	2.7094e-40	0.706897	0.676	0.219	4.59541e-36
Psme1	2.832e-40	0.646829	0.739	0.275	4.80336e-36
Idh2	2.85562e-40	0.817309	0.518	0.122	4.84341e-36
Hnrnpa1	3.0675e-40	0.779885	0.502	0.095	5.20279e-36
Esd	3.26926e-40	0.547464	0.696	0.235	5.54499e-36
Lamp1	3.44489e-40	0.772853	0.854	0.416	5.84288e-36
Kdelr2	3.65051e-40	0.301365	0.885	0.43	6.19163e-36
Fam101b	5.59016e-40	-0.780238	0.17	0.571	9.48147e-36
Bmyc	9.73899e-40	0.605332	0.34	0.025	1.65183e-35
Ly6i	1.07721e-39	-0.350897	0.613	0.615	1.82706e-35
Atp1b3	1.23635e-39	0.511427	0.747	0.279	2.09697e-35
Ptges3	1.28838e-39	0.427209	0.877	0.437	2.18522e-35
Psmb6	1.32594e-39	0.69159	0.767	0.317	2.24892e-35
Arhgdia	1.39431e-39	0.560825	0.929	0.576	2.36489e-35
Ly6a	1.73826e-39	-0.394118	0.751	0.635	2.94826e-35
Psma4	2.20635e-39	0.698732	0.609	0.173	3.7422e-35
Ndufa4	2.51323e-39	0.842007	0.696	0.262	4.2627e-35
Rpl12	3.09116e-39	0.656205	0.613	0.172	5.24292e-35
Itpripl1	3.46398e-39	0.459216	0.696	0.266	5.87526e-35
Tmem176b	4.95752e-39	1.49411	0.316	0.042	8.40845e-35
Reep5	5.06291e-39	0.446333	0.858	0.416	8.5872e-35
Tnfrsf13b	5.54203e-39	0.326631	0.455	0.075	9.39985e-35
Gm12669	6.68067e-39	0.449408	0.569	0.142	1.13311e-34
Mrpl23	8.68991e-39	0.747599	0.526	0.118	1.4739e-34
C5ar1	9.14584e-39	-1.55148	0.277	0.678	1.55123e-34
Stt3a	9.31821e-39	0.658606	0.696	0.256	1.58046e-34
Blvra	9.39903e-39	0.699412	0.49	0.099	1.59417e-34
Cacybp	1.02502e-38	0.540514	0.569	0.155	1.73854e-34
Trmt112	1.02549e-38	0.564658	0.759	0.306	1.73933e-34
Nptn	1.13684e-38	0.365459	0.636	0.19	1.9282e-34
Gm6793	1.42287e-38	0.697072	0.917	0.561	2.41334e-34
Igsf8	1.75949e-38	0.50305	0.439	0.07	2.98427e-34
Serbp1	1.78829e-38	0.259795	0.83	0.375	3.03312e-34
Ost4	2.1622e-38	0.478174	0.727	0.267	3.66731e-34
Gm20594	2.35708e-38	0.599688	0.996	0.852	3.99785e-34
Rnh1	2.38588e-38	0.779541	0.747	0.325	4.04669e-34
Ssr2	2.399e-38	0.734802	0.632	0.198	4.06895e-34
Nrp1	2.64294e-38	0.264779	0.494	0.099	4.4827e-34
Mmp25	2.71385e-38	-1.13178	0.111	0.487	4.60297e-34
Arhgap17	2.88607e-38	0.259457	0.605	0.168	4.89506e-34
Ccl6	3.13797e-38	-0.971107	0.885	0.574	5.32232e-34
Naga	3.20038e-38	0.651981	0.585	0.161	5.42817e-34
Sec61g	3.27648e-38	0.472137	0.66	0.211	5.55723e-34
Adam15	3.78849e-38	0.560556	0.735	0.288	6.42565e-34
Calr	3.85332e-38	0.734347	0.628	0.194	6.53561e-34
Cd63	3.97652e-38	-1.59375	0.174	0.507	6.74458e-34
Gpr183	4.02753e-38	0.253599	0.32	0.024	6.8311e-34
Wfdc17	4.09047e-38	0.689052	0.383	0.046	6.93785e-34
Eef1b2	4.84278e-38	0.590341	0.711	0.312	8.21384e-34
P2rx4	6.66898e-38	0.481583	0.352	0.036	1.13113e-33
Tmem256	6.82171e-38	0.439202	0.648	0.215	1.15703e-33
Erh	7.25109e-38	0.796123	0.668	0.232	1.22986e-33
Nap1l1	7.70112e-38	0.572493	0.972	0.859	1.30619e-33
Ptp4a2	8.77462e-38	0.426763	1	0.818	1.48826e-33
Tmed10	1.16289e-37	0.420123	0.866	0.434	1.97238e-33
Paics	1.24895e-37	0.667879	0.609	0.192	2.11834e-33
Ucp2	1.71948e-37	0.594199	0.988	0.868	2.91641e-33
Abca13	1.85737e-37	-0.283386	0.083	0.485	3.15028e-33
Ndufs8	2.0432e-37	0.708766	0.652	0.216	3.46548e-33
Nagpa	2.10469e-37	0.635857	0.53	0.126	3.56977e-33
Snx1	2.43813e-37	0.62149	0.668	0.236	4.13531e-33
Hmgn1	2.56884e-37	0.62842	0.455	0.085	4.35702e-33
Rnase6	2.6254e-37	0.630508	0.372	0.044	4.45293e-33
Slirp	2.83179e-37	0.637345	0.455	0.08	4.803e-33
Nudt21	3.78553e-37	0.689217	0.597	0.182	6.42065e-33
Jun	4.04558e-37	0.696824	0.822	0.412	6.86171e-33
Stx7	4.67992e-37	0.330535	0.723	0.271	7.93761e-33
Tomm6	6.15024e-37	0.261502	0.85	0.405	1.04314e-32
Sf3b5	6.67427e-37	0.631336	0.617	0.185	1.13202e-32
Snrpd3	7.07502e-37	0.608612	0.672	0.228	1.19999e-32
Rps9	7.33531e-37	0.544334	0.996	0.868	1.24414e-32
Rpl23a	7.47254e-37	0.703251	0.771	0.336	1.26742e-32
Apobec1	1.09373e-36	0.641996	0.628	0.199	1.85507e-32
Ifitm3	1.16481e-36	0.563947	0.968	0.629	1.97564e-32
H2-K1	1.33521e-36	0.562978	0.889	0.498	2.26466e-32
Hspe1	1.34488e-36	0.48789	0.478	0.106	2.28105e-32
Syne1	1.3505e-36	-0.72558	0.858	0.912	2.29058e-32
Hnrnpa2b1	1.39905e-36	0.559572	0.972	0.682	2.37292e-32
Ndufc2	1.60346e-36	0.587241	0.545	0.136	2.71963e-32
Uqcrb	1.64443e-36	0.673306	0.648	0.21	2.78912e-32
Gorasp2	2.0142e-36	0.531095	0.656	0.224	3.41628e-32
Txn2	2.15785e-36	0.610406	0.652	0.216	3.65994e-32
2410006H16Rik	2.41289e-36	0.596515	0.652	0.213	4.0925e-32
Serinc3	2.84874e-36	0.574422	0.917	0.6	4.83174e-32
Hexa	3.5219e-36	0.635932	0.874	0.503	5.9735e-32
Vcp	3.55348e-36	0.561834	0.779	0.371	6.02705e-32
Tceb2	4.08883e-36	0.611476	0.834	0.399	6.93506e-32
Hypk	5.14553e-36	0.486726	0.711	0.266	8.72733e-32
Chi3l1	5.22973e-36	-1.29659	0.648	0.846	8.87015e-32
Asah1	5.3143e-36	0.465712	0.684	0.242	9.01358e-32
Nutf2-ps1	6.63988e-36	0.684072	0.522	0.13	1.12619e-31
S100a11	6.82e-36	-1.18966	0.794	0.841	1.15674e-31
Atp5j2	7.12064e-36	0.628768	0.664	0.23	1.20773e-31
2019-09-02	7.29672e-36	0.490716	0.905	0.533	1.2376e-31
Acat1	8.11466e-36	0.430719	0.573	0.175	1.37633e-31
Nup210	9.59679e-36	0.456372	0.648	0.256	1.62771e-31
Cebpe	1.08009e-35	-1.13727	0.174	0.453	1.83194e-31
Rac2	1.28091e-35	-0.906838	0.96	0.975	2.17256e-31
Ythdf2	1.31804e-35	0.265628	0.826	0.387	2.23554e-31
H2afz	1.49624e-35	0.725106	0.96	0.715	2.53778e-31
Mtch2	1.54351e-35	0.512106	0.601	0.185	2.61794e-31
Tmem14c	1.59226e-35	0.32721	0.652	0.218	2.70062e-31
Rnpep	1.72844e-35	0.46224	0.743	0.303	2.9316e-31
Psat1	1.81572e-35	0.59348	0.375	0.069	3.07964e-31
Uqcr11	1.82755e-35	0.758978	0.589	0.178	3.09971e-31
Ndufb8	1.83117e-35	0.632922	0.791	0.358	3.10585e-31
Prcp	1.86526e-35	0.414193	0.443	0.081	3.16366e-31
Cdc37	2.49694e-35	0.508532	0.7	0.267	4.23505e-31
Cops6	2.63373e-35	0.723026	0.672	0.242	4.46707e-31
Manf	3.12829e-35	0.464834	0.557	0.157	5.30589e-31
Cox6c	3.22115e-35	0.704991	0.711	0.277	5.46339e-31
G3bp1	3.67756e-35	0.589653	0.711	0.288	6.23751e-31
Glrx	3.78793e-35	-1.25355	0.763	0.794	6.42471e-31
Nudc	4.08893e-35	0.755292	0.628	0.237	6.93523e-31
Mrps14	4.52588e-35	0.375174	0.648	0.218	7.67635e-31
F10	4.99903e-35	0.671712	0.727	0.538	8.47886e-31
Strap	6.02848e-35	0.43886	0.636	0.213	1.02249e-30
Ddx39	6.14784e-35	0.815889	0.585	0.217	1.04274e-30
Soat1	6.31514e-35	0.43138	0.929	0.602	1.07111e-30
Atp5g3	6.41747e-35	0.605819	0.708	0.284	1.08847e-30
BC147527	7.20264e-35	0.512103	0.743	0.384	1.22164e-30
Tmem176a	7.52817e-35	1.18722	0.273	0.023	1.27685e-30
Cd74	7.80399e-35	3.30122	0.399	0.097	1.32363e-30
Klf10	8.29741e-35	0.289297	0.597	0.179	1.40732e-30
Pigt	8.7839e-35	0.637964	0.625	0.217	1.48984e-30
Eif4h	1.00054e-34	0.549608	0.806	0.398	1.69702e-30
Mgst3	1.09769e-34	0.6439	0.332	0.035	1.86179e-30
Rrp1	1.23961e-34	0.639115	0.609	0.197	2.1025e-30
Etfa	1.30335e-34	0.63171	0.656	0.242	2.21062e-30
Uqcrq	1.62e-34	0.698642	0.743	0.329	2.74768e-30
Cox7b	1.77126e-34	0.410165	0.609	0.191	3.00424e-30
Cope	1.82061e-34	0.591967	0.779	0.348	3.08793e-30
Fbl	1.85236e-34	0.425187	0.439	0.081	3.14178e-30
Nt5c	1.9151e-34	0.643249	0.506	0.123	3.24819e-30
H13	2.04162e-34	0.377522	0.802	0.379	3.46279e-30
Fkbp2	2.545e-34	0.742497	0.613	0.201	4.31657e-30
Dna2	3.27376e-34	0.321957	0.478	0.105	5.55262e-30
Commd4	3.40726e-34	0.665459	0.542	0.143	5.77906e-30
Emp3	3.51477e-34	0.602482	0.897	0.508	5.96141e-30
Gas7	3.53669e-34	0.484042	0.866	0.479	5.99858e-30
Anxa4	4.19719e-34	0.456656	0.395	0.061	7.11886e-30
Srsf3	4.70397e-34	0.620662	0.83	0.451	7.97841e-30
Ifitm6	4.77972e-34	-1.29068	0.723	0.667	8.10688e-30
Lpxn	5.17902e-34	0.462167	0.261	0.012	8.78413e-30
Pram1	5.23531e-34	-1.15188	0.502	0.721	8.87962e-30
Cct7	5.27416e-34	0.643891	0.672	0.262	8.94549e-30
Srp72	5.8604e-34	0.335427	0.557	0.155	9.93983e-30
Fau	5.87735e-34	0.532144	0.988	0.847	9.96857e-30
Xpnpep1	5.9619e-34	0.493619	0.51	0.128	1.0112e-29
Edf1	6.33242e-34	0.613947	0.711	0.287	1.07404e-29
Idh3b	6.99194e-34	0.684063	0.589	0.181	1.1859e-29
Rn4.5s	8.3792e-34	0.374313	0.917	0.52	1.4212e-29
Arl1	8.4133e-34	0.513671	0.53	0.137	1.42698e-29
Ostc	8.70967e-34	0.649901	0.573	0.168	1.47725e-29
Otub1	8.76795e-34	0.405571	0.893	0.504	1.48713e-29
Pabpc1	9.06028e-34	0.415056	0.964	0.697	1.53671e-29
Ebp	9.29154e-34	0.479856	0.514	0.129	1.57594e-29
Ms4a8a	1.08734e-33	0.586876	0.233	0.012	1.84424e-29
Hn1	1.13651e-33	0.710425	0.747	0.34	1.92764e-29
Bsg	1.14079e-33	0.519266	0.775	0.353	1.93489e-29
Slc35b1	1.29851e-33	0.679582	0.427	0.081	2.2024e-29
Adora2b	1.3463e-33	0.446956	0.269	0.015	2.28345e-29
Emg1	1.44431e-33	0.649788	0.542	0.148	2.44969e-29
Mrpl28	1.74895e-33	0.756059	0.534	0.155	2.96639e-29
Idh3g	1.83029e-33	0.581029	0.648	0.229	3.10435e-29
Lman2	1.88828e-33	0.336321	0.771	0.343	3.20272e-29
Aph1a	1.97781e-33	0.443235	0.652	0.238	3.35456e-29
Cbx3	2.0457e-33	0.610722	0.87	0.486	3.46971e-29
Gm12505	2.32057e-33	-0.96102	0.506	0.785	3.93591e-29
C1qbp	2.39907e-33	0.691756	0.439	0.097	4.06907e-29
Nans	2.44957e-33	0.378111	0.549	0.153	4.15471e-29
Tma7	2.9787e-33	0.48217	0.767	0.336	5.05217e-29
Pros1	3.13768e-33	0.349237	0.352	0.044	5.32183e-29
Eif3m	3.36162e-33	0.613444	0.613	0.206	5.70165e-29
Atp5k	3.44479e-33	0.591586	0.632	0.218	5.8427e-29
Phb2	4.08726e-33	0.595738	0.569	0.174	6.93241e-29
Ipo7	4.1375e-33	0.263202	0.462	0.099	7.01762e-29
Bscl2	4.20024e-33	0.552041	0.585	0.184	7.12402e-29
Nedd8	5.13766e-33	0.491759	0.751	0.322	8.71399e-29
Mrps18a	5.38488e-33	0.481571	0.498	0.12	9.13329e-29
Bzw1	5.42621e-33	0.4488	0.715	0.297	9.20339e-29
Hspd1	5.5236e-33	0.643283	0.538	0.166	9.36858e-29
Cd180	6.90187e-33	0.354995	0.364	0.05	1.17063e-28
Mmp8	6.9543e-33	-2.38395	0.427	0.617	1.17952e-28
Got2	7.74388e-33	0.565787	0.66	0.253	1.31344e-28
Timm23	7.866e-33	0.641237	0.613	0.212	1.33415e-28
Fam89b	7.93765e-33	0.41006	0.593	0.186	1.34631e-28
Ranbp1	8.38167e-33	0.845349	0.613	0.226	1.42162e-28
Cox7c	8.58837e-33	0.532283	0.727	0.3	1.45667e-28
B3gnt8	8.98595e-33	0.549251	0.356	0.049	1.52411e-28
Cwc15	9.89845e-33	0.445326	0.632	0.217	1.67888e-28
Rpn1	9.95294e-33	0.570241	0.783	0.437	1.68812e-28
Slc29a3	1.00598e-32	0.437607	0.577	0.254	1.70623e-28
Sigmar1	1.06057e-32	0.591569	0.415	0.079	1.79883e-28
Fpr1	1.09333e-32	-1.86171	0.079	0.421	1.8544e-28
Atp5h	1.1659e-32	0.620733	0.791	0.371	1.97748e-28
Spcs2	1.21325e-32	0.535182	0.779	0.371	2.0578e-28
Eif2a	1.34743e-32	0.484865	0.407	0.079	2.28537e-28
Dstn	1.49892e-32	-1.1314	0.727	0.737	2.54231e-28
Atp5e	1.80992e-32	0.259453	0.711	0.3	3.06981e-28
Eif3c	2.0932e-32	0.431801	0.676	0.261	3.55027e-28
Arl5c	2.16869e-32	0.336079	0.328	0.043	3.67832e-28
Tspo	2.22114e-32	0.703477	0.893	0.576	3.76728e-28
Ppp1r18	2.29522e-32	-0.564478	0.858	0.765	3.89293e-28
Lyrm4	2.69054e-32	0.361847	0.478	0.112	4.56343e-28
Ddx39b	2.71073e-32	0.515605	0.723	0.304	4.59768e-28
Ccdc12	2.90992e-32	0.309674	0.731	0.31	4.93551e-28
Mrpl36	2.99372e-32	0.573689	0.47	0.108	5.07765e-28
Cycs	3.05757e-32	0.442177	0.814	0.534	5.18594e-28
Kars	3.11856e-32	0.443598	0.522	0.139	5.28939e-28
Trp53inp2	3.87957e-32	-1.14947	0.257	0.566	6.58013e-28
Cox5a	4.01824e-32	0.620201	0.779	0.369	6.81533e-28
Morf4l1	4.16848e-32	0.344694	0.957	0.633	7.07016e-28
Anapc5	4.59307e-32	0.583714	0.731	0.325	7.7903e-28
Coro1c	4.80672e-32	0.341663	0.617	0.209	8.15268e-28
Atp5l	5.02529e-32	0.589117	0.727	0.31	8.5234e-28
Ube2l3	5.26069e-32	0.359457	0.771	0.354	8.92265e-28
Cd177	5.2656e-32	-1.54852	0.81	0.895	8.93098e-28
Sh3bgrl	5.2795e-32	0.328552	0.739	0.317	8.95456e-28
Mrps15	5.33431e-32	0.504807	0.553	0.168	9.04752e-28
Pa2g4	5.73235e-32	0.5289	0.518	0.144	9.72264e-28
Rsl24d1	6.43357e-32	0.394081	0.549	0.162	1.0912e-27
Rpl36	6.44297e-32	0.648464	0.771	0.372	1.09279e-27
Cox8a	7.76814e-32	0.573339	0.893	0.554	1.31755e-27
Nhp2	9.14207e-32	0.572319	0.415	0.082	1.55059e-27
Dnajb11	9.53786e-32	0.581496	0.688	0.322	1.61772e-27
Ghitm	9.74557e-32	0.387202	0.814	0.405	1.65295e-27
Cox7a2l	1.11289e-31	0.383474	0.759	0.338	1.88758e-27
Prelid1	1.19983e-31	0.596932	0.692	0.28	2.03504e-27
Gtf3c6	1.29165e-31	0.452342	0.423	0.083	2.19077e-27
Mvb12a	1.36699e-31	0.552993	0.47	0.11	2.31855e-27
Ifi205	1.69472e-31	0.543975	0.237	0.013	2.87442e-27
Lipa	1.98481e-31	0.27741	0.621	0.216	3.36643e-27
Nubp1	2.13598e-31	0.405287	0.47	0.111	3.62283e-27
Rps12	2.62221e-31	0.591014	0.636	0.234	4.44753e-27
D17Wsu104e	2.73803e-31	0.565545	0.462	0.106	4.64397e-27
Polr2e	2.77731e-31	0.453085	0.486	0.12	4.7106e-27
Ppp2r4	3.32874e-31	0.608555	0.696	0.312	5.64588e-27
Nagk	3.73745e-31	0.531811	0.407	0.076	6.33909e-27
Slc1a5	4.27171e-31	0.44134	0.494	0.13	7.24524e-27
Ndufb6	4.59724e-31	0.681077	0.506	0.135	7.79739e-27
Ssr3	5.04892e-31	0.448626	0.696	0.29	8.56347e-27
Cd300lg	5.15788e-31	0.329362	0.296	0.031	8.74828e-27
Psma5	6.36341e-31	0.550929	0.553	0.167	1.0793e-26
Cyc1	6.80176e-31	0.717665	0.589	0.209	1.15365e-26
Cs	6.89059e-31	0.428145	0.751	0.341	1.16871e-26
Ivns1abp	7.75761e-31	0.385646	0.644	0.24	1.31577e-26
G3bp2	7.77885e-31	0.370717	0.684	0.28	1.31937e-26
2010107E04Rik	9.50906e-31	0.630584	0.628	0.225	1.61283e-26
Xbp1	9.53509e-31	0.424345	0.763	0.352	1.61725e-26
Ndufb11	1.02246e-30	0.461881	0.708	0.294	1.73419e-26
Chchd2	1.02517e-30	0.533316	0.877	0.515	1.73879e-26
Sepp1	1.11897e-30	0.711545	0.735	0.33	1.89788e-26
Ndufa3	1.13848e-30	0.456564	0.751	0.337	1.93097e-26
Npm3	1.79073e-30	0.515008	0.466	0.113	3.03726e-26
2700089E24Rik	1.8441e-30	0.266746	0.676	0.267	3.12778e-26
Mnf1	1.90847e-30	0.484672	0.364	0.057	3.23696e-26
Capza2	2.17747e-30	0.484862	0.917	0.597	3.69321e-26
Gm6644	2.24448e-30	0.46179	0.482	0.123	3.80685e-26
Ap2m1	2.45168e-30	0.47888	0.881	0.528	4.15829e-26
Snhg1	2.96663e-30	0.467664	0.379	0.073	5.03171e-26
Arf4	3.0297e-30	0.388063	0.763	0.359	5.13867e-26
Oxa1l	3.21151e-30	0.407896	0.486	0.131	5.44705e-26
Sft2d1	3.23486e-30	0.380112	0.601	0.207	5.48664e-26
3110001D03Rik	3.23697e-30	0.514814	0.407	0.08	5.49023e-26
Necap2	3.43608e-30	0.504512	0.613	0.219	5.82793e-26
Ssb	3.8471e-30	0.409469	0.668	0.267	6.52506e-26
0610031J06Rik	3.88118e-30	0.533103	0.66	0.257	6.58287e-26
Vps26a	3.88435e-30	0.358804	0.613	0.217	6.58825e-26
Vdac3	3.90725e-30	0.655107	0.652	0.262	6.62708e-26
Mafb	4.13852e-30	0.340544	0.364	0.058	7.01935e-26
Sec11a	4.48154e-30	0.481049	0.621	0.224	7.60114e-26
Pisd	4.53212e-30	0.364592	0.514	0.144	7.68692e-26
Slco4c1	4.61996e-30	-0.749622	0.032	0.336	7.83591e-26
Eif5a	4.79989e-30	0.61583	0.941	0.672	8.1411e-26
Trappc1	5.59547e-30	0.515287	0.573	0.186	9.49048e-26
Hnrnpf	5.81809e-30	0.544534	0.913	0.6	9.86806e-26
Lsm4	6.47179e-30	0.568322	0.545	0.169	1.09768e-25
Snx3	7.47912e-30	0.502402	0.846	0.471	1.26853e-25
Cyp27a1	7.5688e-30	0.390018	0.269	0.025	1.28374e-25
Psmc1	8.55221e-30	0.571141	0.601	0.217	1.45054e-25
Dek	8.897e-30	0.510363	0.719	0.341	1.50902e-25
Racgap1	8.95653e-30	0.577905	0.502	0.159	1.51912e-25
Abcf1	9.24464e-30	0.274323	0.522	0.151	1.56798e-25
Eif3g	9.75986e-30	0.576127	0.605	0.215	1.65537e-25
Hadh	9.82267e-30	0.568265	0.328	0.069	1.66602e-25
Atp13a2	1.00921e-29	0.364696	0.534	0.206	1.71173e-25
Arrb2	1.13492e-29	-0.738983	0.668	0.734	1.92494e-25
Serpinb1a	1.20954e-29	-1.51518	0.506	0.611	2.05149e-25
Bin1	1.23302e-29	0.365435	0.332	0.05	2.09133e-25
Ndufs6	1.25242e-29	0.508655	0.605	0.212	2.12423e-25
Ywhaq	1.30133e-29	0.309455	0.767	0.364	2.20718e-25
Cat	1.39101e-29	0.39741	0.605	0.213	2.35929e-25
Pdcd5	1.41365e-29	0.467121	0.514	0.147	2.3977e-25
Ndufa2	1.68e-29	0.469923	0.692	0.287	2.84945e-25
Ppp2r5c	1.76002e-29	0.335761	0.806	0.408	2.98517e-25
Tcp1	1.94638e-29	0.610863	0.545	0.199	3.30125e-25
Hmox2	1.95352e-29	0.51167	0.648	0.25	3.31337e-25
Lsmd1	2.09171e-29	0.502589	0.415	0.088	3.54775e-25
Prpsap1	2.10467e-29	0.479799	0.47	0.123	3.56973e-25
Pfdn1	2.13897e-29	0.429359	0.458	0.112	3.62791e-25
Mrpl52	2.4232e-29	0.399481	0.308	0.037	4.10999e-25
Tmem258	2.43148e-29	0.56085	0.617	0.225	4.12403e-25
Mrpl21	2.71528e-29	0.304975	0.391	0.075	4.60538e-25
Frrs1	2.76968e-29	0.345774	0.577	0.193	4.69765e-25
Rara	2.8136e-29	-0.362627	0.668	0.374	4.77215e-25
Ndufs7	2.83741e-29	0.571382	0.609	0.219	4.81253e-25
Itgb2l	2.85588e-29	-0.606468	0.016	0.312	4.84386e-25
Trap1	2.85838e-29	0.444527	0.466	0.122	4.8481e-25
Hsd17b12	3.01996e-29	0.45373	0.407	0.088	5.12216e-25
Ewsr1	3.48838e-29	0.432939	0.818	0.434	5.91663e-25
Sdhd	3.69795e-29	0.561881	0.664	0.274	6.27209e-25
Cks1b	3.84138e-29	0.861009	0.498	0.178	6.51536e-25
Steap3	3.93975e-29	0.320006	0.281	0.03	6.6822e-25
Cisd1	5.47267e-29	0.338685	0.332	0.048	9.2822e-25
Tmbim1	5.7576e-29	0.33961	0.308	0.038	9.76546e-25
Gpx1	5.96817e-29	0.459873	0.96	0.729	1.01226e-24
Anp32e	6.19547e-29	0.38202	0.597	0.222	1.05081e-24
2019-09-01	7.0199e-29	-0.498459	0.024	0.324	1.19065e-24
Dnajc19	7.20015e-29	0.429972	0.482	0.13	1.22122e-24
Dcps	7.82799e-29	0.622051	0.466	0.142	1.32771e-24
Cfh	8.29111e-29	0.328358	0.296	0.033	1.40626e-24
Snrpb2	8.81442e-29	0.457876	0.486	0.136	1.49501e-24
Hnrpdl	8.86278e-29	0.365299	0.708	0.31	1.50322e-24
Glo1	9.18435e-29	0.396646	0.458	0.114	1.55776e-24
G0s2	1.12606e-28	-1.58178	0.04	0.331	1.90992e-24
Etfb	1.30714e-28	0.443612	0.692	0.293	2.21703e-24
Anp32b	1.3773e-28	0.436623	0.711	0.312	2.33604e-24
Cmpk1	1.38721e-28	0.458013	0.708	0.325	2.35284e-24
Aldh1b1	1.54051e-28	0.360807	0.221	0.015	2.61285e-24
Timm13	1.62949e-28	0.363096	0.522	0.157	2.76377e-24
Il1f9	1.63475e-28	-1.84546	0.202	0.489	2.7727e-24
Cox6a1	1.65315e-28	0.534704	0.688	0.292	2.80391e-24
Lamtor2	1.69947e-28	0.368016	0.715	0.327	2.88248e-24
Hebp1	1.90592e-28	0.722114	0.486	0.133	3.23264e-24
Kxd1	1.97819e-28	0.557606	0.458	0.117	3.3552e-24
Prkcsh	2.00939e-28	0.46112	0.419	0.094	3.40813e-24
Mrfap1	2.06647e-28	0.320523	0.814	0.424	3.50495e-24
Fgd2	2.0696e-28	0.438785	0.395	0.08	3.51025e-24
Bre	2.1597e-28	0.3909	0.589	0.207	3.66307e-24
Sec13	2.24526e-28	0.523968	0.605	0.224	3.80819e-24
Ifnar2	2.30502e-28	0.334126	0.672	0.278	3.90955e-24
Eif3d	2.39308e-28	0.584472	0.557	0.199	4.0589e-24
Dohh	2.44788e-28	0.632083	0.36	0.07	4.15185e-24
Cct6a	2.68927e-28	0.499892	0.522	0.16	4.56127e-24
Naa20	2.75421e-28	0.550759	0.395	0.091	4.67141e-24
Cyp4f18	2.8366e-28	-1.29613	0.644	0.513	4.81116e-24
Slc25a39	2.88181e-28	0.576552	0.684	0.304	4.88784e-24
Pebp1	2.90392e-28	0.649435	0.542	0.186	4.92533e-24
Tyk2	3.1082e-28	0.260408	0.443	0.107	5.27183e-24
Dhrs3	3.48871e-28	0.576266	0.818	0.455	5.9172e-24
Tufm	3.58369e-28	0.545676	0.435	0.108	6.0783e-24
Snrpe	3.761e-28	0.618714	0.565	0.197	6.37903e-24
Prdx5	4.09064e-28	-0.749754	0.925	0.865	6.93814e-24
Tra2b	4.09127e-28	0.411868	0.85	0.493	6.93919e-24
Ipo5	4.64879e-28	0.353955	0.415	0.108	7.8848e-24
Ngfrap1	4.72491e-28	0.493194	0.336	0.055	8.01392e-24
Babam1	4.94284e-28	0.430533	0.486	0.138	8.38356e-24
Slc40a1	5.12587e-28	-1.04911	0.04	0.344	8.69399e-24
H1f0	5.86631e-28	0.553858	0.482	0.137	9.94985e-24
Psmd12	6.09797e-28	0.447911	0.518	0.157	1.03428e-23
Ndufb5	6.32096e-28	0.488179	0.545	0.181	1.0721e-23
Ptbp1	6.3537e-28	0.528165	0.565	0.205	1.07765e-23
Wdr92	6.64855e-28	-0.699736	0.771	0.907	1.12766e-23
Cldn25	7.0181e-28	0.40437	0.431	0.103	1.19034e-23
Adam8	7.59929e-28	-1.39044	0.202	0.53	1.28892e-23
Stra13	7.92489e-28	0.553391	0.542	0.176	1.34414e-23
Eif2s1	9.35463e-28	0.40007	0.561	0.215	1.58664e-23
Hmgb1	1.03032e-27	0.646823	0.913	0.672	1.74753e-23
Nop10	1.08401e-27	0.299114	0.431	0.106	1.83859e-23
Lcp1	1.2075e-27	-0.990677	0.98	0.988	2.04804e-23
Fabp5	1.21318e-27	0.450787	0.344	0.058	2.05767e-23
Gdi2	1.22611e-27	0.443694	0.893	0.567	2.07961e-23
BC028528	1.42288e-27	0.501779	0.561	0.193	2.41334e-23
Pkig	1.48852e-27	0.349175	0.32	0.046	2.52468e-23
Lgals3bp	1.59728e-27	0.623842	0.391	0.085	2.70915e-23
Ap2a2	1.63764e-27	0.310808	0.802	0.427	2.7776e-23
Supt16	1.80359e-27	0.31287	0.609	0.24	3.05907e-23
Pygl	1.85623e-27	-1.29881	0.561	0.77	3.14836e-23
Cenpa	1.91453e-27	0.744423	0.538	0.195	3.24723e-23
Psmb4	1.97627e-27	0.641131	0.506	0.157	3.35194e-23
Aplp2	2.05472e-27	0.305071	0.439	0.108	3.48501e-23
Atp6v0b	2.07548e-27	0.455868	0.838	0.462	3.52022e-23
Cnbp	2.24664e-27	0.386918	0.783	0.398	3.81052e-23
Rpf2	2.30745e-27	0.369068	0.304	0.042	3.91367e-23
Sdha	2.32838e-27	0.474053	0.648	0.278	3.94916e-23
Pdxk	2.40631e-27	0.316332	0.545	0.253	4.08134e-23
Cyfip2	2.44077e-27	-0.696781	0.289	0.597	4.1398e-23
Sptssa	2.67082e-27	0.490504	0.589	0.215	4.52999e-23
Epsti1	3.07023e-27	0.45953	0.379	0.076	5.20742e-23
Pcnp	3.2182e-27	0.330286	0.846	0.474	5.45839e-23
Sec31a	3.25e-27	0.301464	0.466	0.129	5.51233e-23
Tmed2	3.29555e-27	0.432809	0.881	0.536	5.58958e-23
Utp3	3.50323e-27	0.341306	0.486	0.139	5.94183e-23
Ndufs3	3.64811e-27	0.445848	0.447	0.114	6.18755e-23
Ly9	3.98788e-27	0.396477	0.332	0.056	6.76384e-23
St13	4.14639e-27	0.297109	0.514	0.159	7.0327e-23
Snrpa	5.09957e-27	0.520914	0.482	0.143	8.64938e-23
Tbc1d10c	5.1588e-27	-1.37864	0.126	0.449	8.74984e-23
Psma2	5.22277e-27	0.533426	0.68	0.294	8.85834e-23
Ppp1r15a	5.44803e-27	0.306663	0.419	0.1	9.24041e-23
H2-Ke2	5.82778e-27	0.470335	0.455	0.12	9.8845e-23
Rps6ka4	6.91629e-27	0.448967	0.403	0.092	1.17307e-22
Pold4	7.10951e-27	0.357399	0.474	0.137	1.20584e-22
Casp8	8.41441e-27	0.420209	0.549	0.197	1.42717e-22
Osgep	8.51803e-27	0.538335	0.344	0.074	1.44474e-22
Yif1b	8.56422e-27	0.557937	0.427	0.108	1.45258e-22
Snrpd1	8.90342e-27	0.546532	0.53	0.179	1.51011e-22
Mrps33	9.53886e-27	0.436465	0.518	0.163	1.61789e-22
Eif3a	9.75312e-27	0.316281	0.625	0.251	1.65423e-22
Acaa2	1.04149e-26	0.433715	0.522	0.168	1.76648e-22
Hsd17b4	1.15539e-26	0.339475	0.403	0.092	1.95966e-22
Ms4a4b	1.26776e-26	0.268357	0.206	0.01	2.15025e-22
Eif4b	1.34162e-26	0.440402	0.538	0.188	2.27553e-22
Ssbp1	1.39968e-26	0.31776	0.526	0.17	2.374e-22
Sumf1	1.6388e-26	0.296713	0.427	0.107	2.77958e-22
Cxcr4	1.85183e-26	-0.729329	0.866	0.957	3.14088e-22
Nubp2	1.94285e-26	0.606074	0.474	0.143	3.29526e-22
N6amt2	1.94444e-26	0.562625	0.336	0.057	3.29796e-22
Papd4	2.00149e-26	0.250876	0.506	0.16	3.39474e-22
Ndufa13	2.11487e-26	0.308394	0.783	0.402	3.58703e-22
Ndufv2	2.15052e-26	0.480326	0.628	0.255	3.6475e-22
Naa10	2.37779e-26	0.42314	0.427	0.106	4.03297e-22
Abcd1	2.58545e-26	0.313587	0.601	0.229	4.38517e-22
Mrpl12	2.65154e-26	0.426585	0.364	0.072	4.49727e-22
Wdr18	2.88014e-26	0.332609	0.352	0.072	4.88501e-22
Arap3	2.92499e-26	-0.430617	0.059	0.368	4.96108e-22
Ssrp1	3.03993e-26	0.35515	0.66	0.282	5.15603e-22
Ube2v1	3.49971e-26	0.452074	0.704	0.328	5.93586e-22
Grina	3.53861e-26	-1.59229	0.336	0.607	6.00184e-22
Gmppa	3.63321e-26	0.373283	0.375	0.08	6.1623e-22
Atraid	3.73312e-26	0.539556	0.352	0.067	6.33174e-22
Cse1l	3.74823e-26	0.398352	0.451	0.133	6.35738e-22
Ethe1	4.05062e-26	0.487457	0.755	0.384	6.87026e-22
Tmem160	4.09394e-26	0.388273	0.447	0.119	6.94373e-22
Atp6v1a	4.32748e-26	0.254374	0.656	0.278	7.33984e-22
Mt1	4.34083e-26	0.425434	0.526	0.176	7.36248e-22
Psmb3	4.43758e-26	0.47558	0.723	0.346	7.52659e-22
Scarb2	4.66694e-26	0.337	0.372	0.076	7.9156e-22
2019-09-15	4.75743e-26	0.497949	0.589	0.223	8.06908e-22
Snrnp70	5.0112e-26	0.300877	0.676	0.302	8.4995e-22
Polr3c	5.09244e-26	0.436855	0.462	0.13	8.63729e-22
Nono	5.47189e-26	0.438316	0.731	0.361	9.28087e-22
Uqcrh	5.63522e-26	0.377087	0.589	0.222	9.5579e-22
Kdelr1	5.65144e-26	0.307961	0.621	0.248	9.5854e-22
Hspa9	5.72843e-26	0.506713	0.447	0.138	9.716e-22
Bccip	6.4735e-26	0.427701	0.403	0.094	1.09797e-21
Ccnb2	7.09264e-26	0.758866	0.561	0.223	1.20298e-21
Uqcrc2	7.41547e-26	0.399552	0.542	0.186	1.25774e-21
Cuta	7.66115e-26	0.534457	0.542	0.186	1.29941e-21
Psmd4	7.68421e-26	0.418307	0.597	0.229	1.30332e-21
Sumo2	7.81578e-26	0.418742	0.826	0.462	1.32563e-21
Ccdc115	7.90951e-26	0.528485	0.518	0.174	1.34153e-21
Hspa4	7.90974e-26	0.250949	0.652	0.28	1.34157e-21
Clec10a	7.92844e-26	0.492103	0.198	0.02	1.34474e-21
Ncf1	8.10603e-26	-1.11525	0.719	0.795	1.37486e-21
R3hdm4	8.30108e-26	-1.19959	0.802	0.845	1.40795e-21
Sumo1	8.41898e-26	0.365827	0.767	0.39	1.42794e-21
Sun2	8.71507e-26	-0.928022	0.593	0.75	1.47816e-21
Papss2	9.71863e-26	0.311787	0.439	0.226	1.64838e-21
Psmc4	9.75941e-26	0.540419	0.577	0.219	1.65529e-21
Rrp7a	1.06804e-25	0.471562	0.447	0.123	1.8115e-21
Ndufc1	1.09481e-25	0.501369	0.49	0.153	1.8569e-21
Abhd12	1.19083e-25	0.396696	0.447	0.122	2.01977e-21
Cmtm7	1.32025e-25	0.372386	0.85	0.496	2.23927e-21
Sarnp	1.34499e-25	0.402257	0.656	0.281	2.28124e-21
Evi2a	1.39332e-25	0.486803	0.743	0.381	2.36321e-21
Gca	1.43739e-25	-0.484602	0.059	0.329	2.43796e-21
Ndufb10	1.51199e-25	0.54862	0.601	0.236	2.56448e-21
Fcf1	1.52871e-25	0.552487	0.478	0.143	2.59285e-21
2810417H13Rik	1.67493e-25	0.517448	0.609	0.312	2.84085e-21
Cyp20a1	1.79949e-25	0.357869	0.221	0.02	3.05212e-21
Ear6	1.82652e-25	-1.54793	0.704	0.36	3.09797e-21
Gtf3a	1.87734e-25	0.462646	0.403	0.097	3.18416e-21
Psmd2	1.95819e-25	0.462697	0.597	0.246	3.32129e-21
Bola2	2.05508e-25	0.303476	0.399	0.099	3.48563e-21
Dnajc7	2.06128e-25	0.384727	0.565	0.206	3.49614e-21
Fkbp4	2.1555e-25	0.533804	0.486	0.162	3.65594e-21
Copz1	2.27079e-25	0.457282	0.755	0.399	3.85149e-21
Chchd3	2.35686e-25	0.503499	0.435	0.124	3.99748e-21
Plxdc1	2.39318e-25	0.279842	0.221	0.015	4.05908e-21
Metap2	2.55787e-25	0.256837	0.715	0.344	4.3384e-21
Hadha	2.88102e-25	0.291051	0.502	0.162	4.88651e-21
Spr	2.89342e-25	0.454445	0.285	0.038	4.90753e-21
Cysltr1	3.07452e-25	0.269816	0.198	0.011	5.2147e-21
Arf2	3.09751e-25	0.309587	0.34	0.063	5.25369e-21
Surf4	3.21904e-25	0.394684	0.779	0.417	5.45982e-21
Psmd7	3.2289e-25	0.438231	0.53	0.181	5.47654e-21
Ctnna1	3.27509e-25	0.331901	0.53	0.181	5.55488e-21
Gps2	3.31582e-25	0.269811	0.53	0.181	5.62396e-21
Rab1	3.65044e-25	0.250357	0.759	0.389	6.19151e-21
Dpep2	3.6723e-25	0.302124	0.198	0.011	6.22859e-21
Mrpl37	3.70693e-25	0.447209	0.364	0.08	6.28733e-21
Polr1d	3.73265e-25	0.467145	0.569	0.213	6.33095e-21
Psmd14	3.89128e-25	0.499567	0.593	0.234	6.6e-21
Icam1	4.24572e-25	0.551228	0.292	0.044	7.20117e-21
Tm9sf1	4.79234e-25	0.406029	0.482	0.153	8.12829e-21
Ergic3	5.08986e-25	0.447342	0.581	0.222	8.63291e-21
Tmem242	5.25782e-25	0.461666	0.419	0.11	8.91779e-21
Psmc3	5.72847e-25	0.509037	0.648	0.288	9.71606e-21
Cln6	5.74061e-25	0.442266	0.439	0.122	9.73665e-21
Sri	5.75757e-25	-0.744043	0.794	0.784	9.76542e-21
Cct3	6.1105e-25	0.564189	0.411	0.112	1.0364e-20
Echs1	6.22304e-25	0.476426	0.49	0.157	1.05549e-20
Vimp	6.88732e-25	0.373352	0.522	0.176	1.16816e-20
Polr2d	7.03227e-25	0.501358	0.399	0.103	1.19274e-20
Cnp	7.12015e-25	0.280668	0.375	0.085	1.20765e-20
Eif4a3	7.18006e-25	0.522726	0.585	0.242	1.21781e-20
Creld2	7.21558e-25	0.577738	0.443	0.128	1.22383e-20
Trafd1	8.70811e-25	0.30875	0.549	0.198	1.47698e-20
Hnrnpk	9.08916e-25	0.393846	0.957	0.715	1.54161e-20
Clic1	9.19191e-25	0.353311	0.968	0.719	1.55904e-20
Cbx1	9.213e-25	0.307272	0.569	0.213	1.56262e-20
Cdk5rap3	1.02652e-24	0.389311	0.399	0.098	1.74108e-20
Cd40	1.02838e-24	0.262827	0.225	0.018	1.74423e-20
2810428I15Rik	1.15157e-24	0.387017	0.364	0.079	1.95318e-20
Arpc5l	1.18304e-24	0.432493	0.498	0.161	2.00655e-20
Ndufa9	1.25467e-24	0.456955	0.431	0.118	2.12804e-20
1810022K09Rik	1.27433e-24	0.347441	0.427	0.118	2.16138e-20
Khk	1.28894e-24	0.410797	0.451	0.13	2.18618e-20
Lamtor5	1.33898e-24	0.480244	0.569	0.216	2.27104e-20
Pes1	1.34454e-24	0.309919	0.439	0.122	2.28048e-20
Usf1	1.40103e-24	0.335176	0.403	0.1	2.37629e-20
Mdh1	1.43883e-24	0.492752	0.569	0.222	2.4404e-20
2610524H06Rik	1.46692e-24	0.298214	0.589	0.257	2.48803e-20
Sae1	1.6217e-24	0.565347	0.53	0.2	2.75056e-20
Rnase4	1.67678e-24	0.373335	0.304	0.049	2.84399e-20
Sars	1.82145e-24	0.263972	0.466	0.142	3.08937e-20
Ndufa5	2.11242e-24	0.526792	0.458	0.137	3.58287e-20
Oat	2.23334e-24	0.445522	0.407	0.107	3.78797e-20
Timm50	2.23615e-24	0.516351	0.447	0.131	3.79273e-20
Thoc7	2.25314e-24	0.47992	0.466	0.144	3.82155e-20
Ccpg1	2.40585e-24	-1.35552	0.526	0.626	4.08057e-20
Pigs	2.41986e-24	0.373872	0.542	0.198	4.10433e-20
Rwdd1	2.5037e-24	0.379478	0.451	0.131	4.24652e-20
Cnpy2	2.51085e-24	0.380944	0.407	0.104	4.25865e-20
Psmb2	2.5201e-24	0.586638	0.664	0.303	4.27435e-20
H2afv	2.58838e-24	0.390373	0.672	0.308	4.39016e-20
Emc6	2.80644e-24	0.388387	0.458	0.136	4.75999e-20
Cetn3	2.96145e-24	0.419931	0.538	0.193	5.02291e-20
Ube2f	2.96418e-24	0.49315	0.482	0.153	5.02755e-20
Magt1	3.0761e-24	0.272347	0.953	0.884	5.21737e-20
Vps29	3.18845e-24	0.372162	0.565	0.215	5.40793e-20
Tnfsf13	3.59813e-24	0.394339	0.435	0.122	6.10279e-20
Ndufv1	3.60063e-24	0.582821	0.534	0.21	6.10702e-20
D10Wsu52e	3.67589e-24	0.512544	0.423	0.118	6.23467e-20
Timm17a	3.69093e-24	0.385302	0.506	0.169	6.26019e-20
Mrps26	3.8471e-24	0.511164	0.411	0.11	6.52506e-20
Usmg5	4.14732e-24	0.306511	0.439	0.131	7.03426e-20
Me2	4.15703e-24	0.513138	0.727	0.379	7.05075e-20
Cox7a2	4.5721e-24	0.406336	0.656	0.293	7.75474e-20
Haao	4.86726e-24	0.296866	0.296	0.048	8.25536e-20
Snrpd2	5.1576e-24	0.543703	0.439	0.126	8.7478e-20
Caprin1	5.16907e-24	0.27995	0.668	0.305	8.76726e-20
Ociad1	5.35152e-24	0.376147	0.625	0.266	9.07672e-20
Rnf187	5.68986e-24	0.31221	0.447	0.13	9.65058e-20
Slc35c1	6.73294e-24	0.29677	0.553	0.206	1.14197e-19
Ogdh	6.74306e-24	0.308829	0.992	0.945	1.14369e-19
Tuba1a	7.22363e-24	0.596752	0.538	0.2	1.2252e-19
Stmn1	8.03673e-24	0.775601	0.605	0.282	1.36311e-19
Sirpb1b	8.20344e-24	-0.554385	0.565	0.293	1.39138e-19
Samhd1	8.57973e-24	-0.427495	0.783	0.504	1.45521e-19
Mrps34	8.71739e-24	0.467572	0.356	0.077	1.47856e-19
Birc5	8.80243e-24	0.760242	0.818	0.671	1.49298e-19
Ube2a	9.3565e-24	0.288984	0.553	0.207	1.58696e-19
Idh3a	9.68288e-24	0.394487	0.387	0.107	1.64231e-19
Lsm7	9.69034e-24	0.431809	0.328	0.063	1.64358e-19
Phb	1.02489e-23	0.466156	0.458	0.145	1.73831e-19
Pnp	1.03518e-23	0.33451	0.482	0.155	1.75577e-19
Spink2	1.07757e-23	0.35011	0.154	0.004	1.82767e-19
Snrpa1	1.10279e-23	0.494545	0.455	0.142	1.87045e-19
Trp53	1.24831e-23	0.351358	0.439	0.126	2.11726e-19
Tars	1.2692e-23	0.395445	0.356	0.086	2.15269e-19
Gpr65	1.27207e-23	0.319638	0.372	0.087	2.15756e-19
Fam60a	1.34869e-23	0.281302	0.36	0.08	2.28751e-19
Crispld2	1.37446e-23	-0.556216	0.028	0.282	2.33121e-19
Adap2	1.45215e-23	0.335855	0.383	0.094	2.46298e-19
Ankrd22	1.45743e-23	-0.581544	0.008	0.246	2.47195e-19
Slc39a7	1.57371e-23	0.300133	0.534	0.194	2.66918e-19
Bloc1s2a	1.58325e-23	0.388217	0.451	0.135	2.68536e-19
Adrm1	1.6491e-23	0.41588	0.557	0.212	2.79704e-19
Dnase1l1	1.67935e-23	0.304172	0.344	0.074	2.84834e-19
Nop58	2.10221e-23	0.307131	0.372	0.087	3.56556e-19
Ccna2	2.10808e-23	0.67161	0.486	0.201	3.57551e-19
Fxr1	2.20393e-23	0.31091	0.518	0.182	3.73808e-19
Inhba	2.30829e-23	-0.700528	0.008	0.235	3.91509e-19
Limd2	2.32345e-23	-0.813824	0.85	0.878	3.9408e-19
Comt	2.37378e-23	0.316611	0.968	0.834	4.02617e-19
Parp2	2.48212e-23	0.339893	0.455	0.138	4.20993e-19
Gm8615	2.48769e-23	0.33554	0.455	0.139	4.21937e-19
Psmd11	2.77074e-23	0.262341	0.565	0.222	4.69946e-19
Vdac1	3.0712e-23	0.402002	0.672	0.323	5.20906e-19
Polr2j	3.16347e-23	0.47782	0.542	0.201	5.36555e-19
Polb	3.4247e-23	0.32711	0.391	0.1	5.80864e-19
Psmb5	3.4986e-23	0.422396	0.526	0.19	5.93398e-19
St3gal5	3.50795e-23	-0.890902	0.055	0.324	5.94984e-19
Ict1	3.75896e-23	0.462377	0.427	0.123	6.37558e-19
Sfxn3	3.83047e-23	0.359916	0.427	0.151	6.49685e-19
Nhp2l1	3.88368e-23	0.470579	0.478	0.159	6.58712e-19
Nucb1	4.751e-23	0.345456	0.64	0.285	8.05818e-19
Rbx1	5.79775e-23	0.283141	0.704	0.348	9.83357e-19
Anxa7	6.21019e-23	0.379589	0.466	0.15	1.05331e-18
Tbc1d22a	6.29079e-23	0.357667	0.364	0.087	1.06698e-18
Gars	6.35442e-23	0.388335	0.455	0.141	1.07777e-18
Mrpl32	6.92939e-23	0.250309	0.375	0.1	1.17529e-18
Hvcn1	7.12798e-23	-0.970228	0.17	0.446	1.20898e-18
Ext2	7.16784e-23	0.336056	0.356	0.082	1.21574e-18
Hnrnpm	7.26913e-23	0.310523	0.648	0.298	1.23292e-18
Tmem219	8.2702e-23	0.308625	0.49	0.168	1.40271e-18
Akr1b3	8.47591e-23	0.46342	0.253	0.032	1.4376e-18
Vdac2	8.60145e-23	0.356806	0.715	0.36	1.45889e-18
0610007P14Rik	8.86294e-23	0.279701	0.368	0.091	1.50324e-18
Vps33a	9.24644e-23	0.265839	0.312	0.063	1.56829e-18
Eif2s3x	9.35641e-23	0.311803	0.431	0.126	1.58694e-18
Ube2i	9.84474e-23	0.319663	0.708	0.353	1.66977e-18
Immt	9.97158e-23	0.362858	0.47	0.156	1.69128e-18
Keap1	1.00243e-22	0.327937	0.435	0.131	1.70022e-18
1810033B17Rik	1.00601e-22	-1.09765	0.545	0.631	1.7063e-18
Dnajc11	1.13085e-22	0.29757	0.292	0.052	1.91804e-18
Eif6	1.19233e-22	0.388671	0.569	0.229	2.02231e-18
Mta2	1.40744e-22	0.370164	0.664	0.315	2.38715e-18
Sf3a3	1.48208e-22	0.444221	0.411	0.128	2.51376e-18
Lpcat2	1.54737e-22	-1.02491	0.19	0.504	2.62449e-18
AA467197	1.61341e-22	-0.554418	0	0.199	2.7365e-18
Ywhab	1.63629e-22	0.34289	0.885	0.583	2.77532e-18
Acap1	1.67749e-22	-0.926439	0.126	0.427	2.84518e-18
Psmd13	1.67768e-22	0.453103	0.617	0.275	2.84551e-18
Tfg	1.69749e-22	0.433451	0.478	0.163	2.87911e-18
Mpv17l2	1.75517e-22	0.450529	0.356	0.082	2.97694e-18
Csde1	1.80835e-22	0.270356	0.885	0.589	3.06715e-18
Leprot	1.81343e-22	0.36902	0.47	0.155	3.07576e-18
Raver1	1.8324e-22	0.260704	0.478	0.16	3.10793e-18
Atp5f1	1.94549e-22	0.49058	0.787	0.48	3.29974e-18
Blmh	1.96141e-22	0.435905	0.411	0.124	3.32674e-18
Samm50	2.01172e-22	0.492285	0.518	0.193	3.41208e-18
Bid	2.03976e-22	0.328951	0.53	0.198	3.45963e-18
Actl6a	2.06269e-22	0.430383	0.387	0.101	3.49852e-18
Lsm2	2.10315e-22	0.43148	0.451	0.145	3.56715e-18
Eftud2	2.12382e-22	0.392714	0.375	0.116	3.60221e-18
Ripk3	2.16365e-22	0.476422	0.36	0.097	3.66977e-18
Yipf3	2.17621e-22	0.335636	0.478	0.16	3.69107e-18
Lta4h	2.21018e-22	-1.00596	0.628	0.584	3.74869e-18
Arcn1	2.26936e-22	0.364985	0.557	0.223	3.84906e-18
2019-03-02	2.36896e-22	0.308747	0.372	0.092	4.01799e-18
Smpdl3a	2.37408e-22	0.285971	0.814	0.476	4.02668e-18
Lmf1	2.39162e-22	0.311181	0.233	0.026	4.05643e-18
Tpgs1	2.45109e-22	0.476477	0.419	0.12	4.15729e-18
Ndufb9	2.49103e-22	0.368981	0.648	0.298	4.22503e-18
Trem1	2.61235e-22	-1.32542	0.194	0.478	4.43082e-18
Prdx3	2.68951e-22	0.465784	0.443	0.145	4.56168e-18
Aamp	2.7088e-22	0.370488	0.617	0.272	4.59439e-18
Cryl1	2.72297e-22	0.397912	0.217	0.021	4.61843e-18
Ggh	2.83246e-22	0.309852	0.312	0.064	4.80414e-18
Cx3cr1	3.17259e-22	0.37308	0.628	0.312	5.38103e-18
Plin2	3.27157e-22	0.401125	0.775	0.445	5.54891e-18
Ctsl	3.61476e-22	0.321391	0.225	0.026	6.131e-18
Mettl21d	3.91894e-22	0.338828	0.221	0.024	6.64691e-18
Csnk1a1	3.93607e-22	0.33932	0.644	0.299	6.67597e-18
Dnajc15	3.96269e-22	0.39078	0.344	0.077	6.72111e-18
Ncaph2	4.33929e-22	0.408368	0.545	0.217	7.35988e-18
Uqcr10	4.51433e-22	0.477189	0.526	0.197	7.65676e-18
Mgat2	5.34956e-22	0.385055	0.435	0.137	9.07339e-18
Fam174a	5.76137e-22	0.274987	0.356	0.085	9.77185e-18
Farsb	6.33923e-22	0.264629	0.32	0.066	1.0752e-17
Spata6	6.3594e-22	0.28067	0.237	0.029	1.07862e-17
Polr2f	6.41287e-22	0.379333	0.336	0.074	1.08769e-17
Ppm1g	6.95108e-22	0.428674	0.561	0.234	1.17897e-17
Ftl1	6.95399e-22	0.333006	1	1	1.17947e-17
Bckdha	7.55399e-22	0.283087	0.324	0.069	1.28123e-17
Plbd2	7.61609e-22	0.2818	0.34	0.076	1.29177e-17
0610010K14Rik	8.38228e-22	0.347734	0.478	0.163	1.42172e-17
Ceacam2	8.39294e-22	-0.53218	0.613	0.657	1.42353e-17
Atf6b	9.79033e-22	0.268645	0.628	0.285	1.66054e-17
Mrps12	9.98759e-22	0.413172	0.34	0.077	1.694e-17
Tbca	1.07211e-21	0.369012	0.482	0.168	1.81841e-17
Pttg1	1.08528e-21	0.64585	0.458	0.156	1.84074e-17
Commd1	1.09407e-21	0.471552	0.581	0.246	1.85566e-17
Shmt2	1.11203e-21	0.504134	0.364	0.105	1.88612e-17
Ptcd2	1.11893e-21	0.42438	0.336	0.075	1.89782e-17
Aprt	1.12374e-21	0.514497	0.727	0.384	1.90598e-17
Ncln	1.18918e-21	0.428445	0.569	0.248	2.01698e-17
Dctn3	1.21184e-21	0.295404	0.561	0.23	2.0554e-17
Tmem147	1.30935e-21	0.505268	0.375	0.099	2.2208e-17
Casp6	1.32604e-21	0.437543	0.249	0.036	2.2491e-17
Ppp1ca	1.43279e-21	0.402869	0.929	0.7	2.43015e-17
Pilrb2	1.50195e-21	-0.882474	0.32	0.578	2.54746e-17
Ndufa12	1.52677e-21	0.508593	0.617	0.277	2.58955e-17
Ndufb3	1.54406e-21	0.361221	0.557	0.226	2.61888e-17
Ap1g2	1.60355e-21	0.334992	0.312	0.063	2.71978e-17
Psmd6	1.64412e-21	0.551673	0.502	0.194	2.7886e-17
Acot7	1.71492e-21	0.406788	0.419	0.125	2.90867e-17
Bcap31	1.72571e-21	0.403756	0.625	0.282	2.92698e-17
Ncam1	1.80322e-21	-0.32426	0.233	0.517	3.05844e-17
Atp5j	1.81963e-21	0.324315	0.648	0.306	3.08628e-17
Llph	1.89242e-21	0.38653	0.49	0.193	3.20974e-17
Rnps1	1.90916e-21	0.521605	0.506	0.188	3.23813e-17
Lamtor1	1.97935e-21	0.37398	0.7	0.359	3.35717e-17
Nipa2	2.08494e-21	0.262749	0.352	0.087	3.53627e-17
Nsfl1c	2.19454e-21	0.418224	0.399	0.113	3.72216e-17
Ly75	2.24663e-21	-0.414854	0.059	0.321	3.8105e-17
Mrps16	2.25143e-21	0.397871	0.411	0.12	3.81865e-17
Kdm6b	2.59017e-21	-0.395372	0.85	0.938	4.39318e-17
Psmg4	2.65749e-21	0.352935	0.269	0.045	4.50736e-17
Dgat2	2.88954e-21	-0.935871	0.119	0.39	4.90095e-17
Meaf6	2.98012e-21	0.318974	0.332	0.076	5.05458e-17
Cct2	3.2771e-21	0.369958	0.514	0.194	5.55829e-17
Spcs3	3.34095e-21	0.407408	0.573	0.253	5.66659e-17
Sfxn5	3.45911e-21	-0.900135	0.372	0.491	5.867e-17
P2rx7	3.54931e-21	0.295821	0.336	0.081	6.01999e-17
Mrpl2	3.73309e-21	0.486453	0.368	0.095	6.3317e-17
Cd3d	3.99669e-21	-0.840879	0.142	0.364	6.77878e-17
Ndufab1	4.32672e-21	0.298865	0.427	0.132	7.33854e-17
Htatsf1	4.33128e-21	0.267685	0.383	0.105	7.34629e-17
Srsf7	4.81743e-21	0.289421	0.581	0.248	8.17085e-17
Tspan3	4.94265e-21	0.453609	0.213	0.023	8.38323e-17
Oas1a	5.38945e-21	0.319198	0.526	0.204	9.14104e-17
Txnl4a	5.4878e-21	0.483631	0.87	0.745	9.30786e-17
Morf4l2	5.49531e-21	0.427463	0.518	0.207	9.32059e-17
Emr1	5.526e-21	0.397138	0.466	0.16	9.37264e-17
Bphl	5.62596e-21	0.465768	0.245	0.041	9.54219e-17
Pgd	5.90969e-21	-0.978964	0.708	0.778	1.00234e-16
Hprt	5.97619e-21	0.390743	0.506	0.191	1.01362e-16
Pgk1	6.08321e-21	0.431013	0.739	0.421	1.03177e-16
Trmt1	6.94122e-21	0.31414	0.277	0.051	1.1773e-16
Tbcb	7.05802e-21	0.455247	0.522	0.203	1.19711e-16
Tagln2	7.43647e-21	0.621287	0.704	0.393	1.2613e-16
Pcbp1	7.89536e-21	0.291528	0.549	0.225	1.33913e-16
Tmem192	7.91815e-21	0.31455	0.32	0.07	1.343e-16
Ccdc124	9.07539e-21	0.437071	0.518	0.204	1.53928e-16
Pdhb	1.01538e-20	0.383472	0.549	0.225	1.72218e-16
Myl12b	1.03846e-20	-0.558013	0.984	0.973	1.76133e-16
Malat1	1.05928e-20	-0.619651	0.996	0.999	1.79665e-16
Hist1h2bg	1.0881e-20	0.469217	0.411	0.125	1.84553e-16
Tomm40	1.11466e-20	0.496735	0.34	0.094	1.89057e-16
Pnkp	1.165e-20	-0.95177	0.502	0.615	1.97595e-16
Trmt2a	1.19081e-20	0.298918	0.419	0.131	2.01973e-16
Mrps24	1.27374e-20	0.350059	0.542	0.23	2.16039e-16
Tnfsf9	1.30271e-20	0.269933	0.142	0.004	2.20952e-16
Ltv1	1.34842e-20	0.367152	0.36	0.094	2.28706e-16
Siva1	1.38773e-20	0.563277	0.518	0.204	2.35373e-16
Acadl	1.39394e-20	0.331118	0.391	0.112	2.36426e-16
Ccdc53	1.4263e-20	0.424112	0.336	0.081	2.41914e-16
Csf3r	1.45875e-20	-1.47328	0.842	0.901	2.47419e-16
Ddx1	1.47421e-20	0.37044	0.411	0.126	2.50041e-16
Ddb1	1.52611e-20	0.325502	0.423	0.143	2.58844e-16
Brms1	1.5544e-20	0.352347	0.399	0.118	2.63642e-16
Tfec	1.59536e-20	0.358784	0.285	0.056	2.70589e-16
Slc35a4	1.61768e-20	0.351051	0.494	0.184	2.74375e-16
Fkbp3	1.62156e-20	0.355783	0.415	0.128	2.75033e-16
Taf9	1.7227e-20	0.418688	0.538	0.223	2.92187e-16
9030617O03Rik	1.72341e-20	0.340697	0.328	0.094	2.92307e-16
Snrnp25	1.75018e-20	0.479693	0.332	0.079	2.96848e-16
Mvp	1.78757e-20	0.250552	0.439	0.145	3.03191e-16
Chchd1	1.81473e-20	0.394684	0.344	0.086	3.07797e-16
Tmpo	1.83083e-20	0.344768	0.526	0.217	3.10527e-16
Lman1	1.86431e-20	0.295899	0.352	0.093	3.16206e-16
Ilf3	1.94338e-20	0.340671	0.526	0.223	3.29617e-16
Exosc3	2.11784e-20	0.37573	0.387	0.111	3.59207e-16
Socs6	2.18314e-20	0.271306	0.289	0.058	3.70283e-16
Nmral1	2.20142e-20	0.425884	0.257	0.043	3.73383e-16
Mta3	2.28359e-20	0.266085	0.324	0.075	3.8732e-16
Apoa1bp	2.28687e-20	0.432203	0.427	0.137	3.87876e-16
Ndufb2	2.41814e-20	0.383884	0.387	0.111	4.10141e-16
Anxa11	2.47087e-20	-0.49933	0.49	0.645	4.19085e-16
Dnpep	2.52233e-20	0.38708	0.383	0.108	4.27813e-16
Vasp	2.52855e-20	-0.757535	0.684	0.797	4.28867e-16
Sirpa	2.5939e-20	0.304206	0.862	0.555	4.39951e-16
Mrpl24	2.65265e-20	0.367289	0.407	0.124	4.49917e-16
Fam96b	2.69202e-20	0.385358	0.3	0.062	4.56593e-16
Rsl1d1	2.74285e-20	0.349231	0.352	0.091	4.65215e-16
AI413582	2.86479e-20	0.355112	0.462	0.163	4.85896e-16
Lmna	2.87308e-20	0.448923	0.209	0.023	4.87304e-16
Tram1	2.91396e-20	0.264698	0.656	0.322	4.94237e-16
Hmbs	2.94141e-20	0.485841	0.352	0.104	4.98893e-16
Hmga1-rs1	3.02526e-20	0.402081	0.522	0.207	5.13114e-16
Phf5a	3.02997e-20	0.282117	0.387	0.113	5.13913e-16
Golt1b	3.71903e-20	0.310162	0.545	0.226	6.30785e-16
9130401M01Rik	3.84668e-20	0.353645	0.265	0.045	6.52436e-16
Eif1a	3.94017e-20	0.283391	0.34	0.085	6.68292e-16
Abcb8	3.97871e-20	0.33174	0.241	0.043	6.74828e-16
Sucla2	4.00765e-20	0.356519	0.419	0.133	6.79738e-16
Atp6v1b2	4.1886e-20	0.310821	0.81	0.499	7.10428e-16
Fpr2	4.44004e-20	-0.779071	0.028	0.261	7.53075e-16
Arl6ip4	4.52776e-20	0.441319	0.415	0.133	7.67953e-16
Tada1	4.91337e-20	0.41903	0.387	0.114	8.33356e-16
Ear1	5.26004e-20	-0.668062	0.779	0.452	8.92155e-16
Api5	5.95264e-20	0.326127	0.609	0.285	1.00963e-15
Ppap2c	6.19433e-20	0.299538	0.138	0.005	1.05062e-15
BC002163	6.29967e-20	0.369761	0.545	0.229	1.06849e-15
Pea15a	6.36468e-20	0.434854	0.277	0.054	1.07951e-15
Agpat2	6.70588e-20	-0.885315	0.107	0.329	1.13739e-15
Fam53a	7.06182e-20	0.363248	0.277	0.054	1.19776e-15
Ffar2	7.27321e-20	-0.443938	0.012	0.225	1.23361e-15
Gba	7.52359e-20	0.35476	0.451	0.156	1.27608e-15
Suclg1	7.63637e-20	0.491396	0.431	0.145	1.2952e-15
Smim11	7.98097e-20	0.294405	0.364	0.101	1.35365e-15
Psmc6	9.22335e-20	0.335334	0.557	0.238	1.56437e-15
AW112010	9.86592e-20	0.480689	0.245	0.038	1.67336e-15
Tacstd2	1.00796e-19	-0.788907	0.036	0.261	1.70961e-15
Dpagt1	1.01439e-19	0.322404	0.395	0.123	1.7205e-15
Prep	1.04064e-19	0.382756	0.395	0.124	1.76503e-15
Sf3b3	1.07698e-19	0.291198	0.451	0.16	1.82667e-15
Ifi35	1.10501e-19	0.252278	0.458	0.163	1.87421e-15
Tm2d2	1.16661e-19	0.2928	0.466	0.169	1.97869e-15
Copb2	1.16998e-19	0.305488	0.415	0.132	1.98441e-15
Pgls	1.18483e-19	0.355054	0.664	0.334	2.00959e-15
Ear10	1.19617e-19	-0.734297	0.711	0.406	2.02882e-15
D10Jhu81e	1.19767e-19	0.424539	0.332	0.083	2.03137e-15
Glt25d1	1.21345e-19	0.286399	0.368	0.103	2.05813e-15
Wdr3	1.27247e-19	0.257879	0.292	0.061	2.15824e-15
Junb	1.28181e-19	-0.649934	0.818	0.547	2.17408e-15
Tsfm	1.32956e-19	0.294454	0.257	0.045	2.25507e-15
Smarcb1	1.43117e-19	0.38407	0.466	0.17	2.42741e-15
Fzr1	1.50067e-19	0.382112	0.403	0.125	2.54528e-15
Dctpp1	1.64782e-19	0.310497	0.312	0.072	2.79486e-15
Snx17	1.77643e-19	0.331957	0.494	0.19	3.013e-15
Pmf1	1.78536e-19	0.533227	0.439	0.167	3.02815e-15
Psmd3	1.87456e-19	0.371386	0.407	0.131	3.17943e-15
Hspbp1	1.91387e-19	0.339016	0.233	0.039	3.24611e-15
Ola1	1.93063e-19	0.306276	0.395	0.122	3.27454e-15
Mlkl	1.97951e-19	0.370541	0.296	0.064	3.35744e-15
Polr2m	2.00372e-19	0.448328	0.482	0.187	3.39851e-15
Rbck1	2.0041e-19	0.297504	0.585	0.263	3.39915e-15
Wdr36	2.02755e-19	0.284403	0.32	0.081	3.43893e-15
Mrps28	2.03114e-19	0.398775	0.265	0.05	3.44501e-15
Mcrs1	2.05546e-19	0.277257	0.407	0.129	3.48626e-15
Aco2	2.15184e-19	0.303505	0.482	0.181	3.64973e-15
Cuedc2	2.15618e-19	0.2877	0.569	0.25	3.6571e-15
Tubb6	2.26593e-19	0.422149	0.233	0.035	3.84325e-15
Mgst1	2.30129e-19	-0.857492	0.767	0.723	3.90321e-15
Ten1	2.35443e-19	0.432404	0.281	0.056	3.99335e-15
Psmg2	2.56319e-19	0.381714	0.292	0.062	4.34743e-15
Dpp9	2.77079e-19	0.337573	0.332	0.098	4.69954e-15
Jtb	2.86705e-19	0.426413	0.375	0.111	4.86281e-15
Tor1a	3.24937e-19	0.429878	0.617	0.297	5.51126e-15
Lxn	3.52476e-19	0.358956	0.221	0.031	5.97835e-15
H2-Eb1	3.66331e-19	2.53414	0.13	0.057	6.21334e-15
Fkbp1b	3.75822e-19	0.298528	0.198	0.021	6.37432e-15
Gosr2	3.83094e-19	0.286534	0.494	0.192	6.49766e-15
Vars	3.83943e-19	0.290627	0.387	0.12	6.51206e-15
Alg5	3.93713e-19	0.364694	0.344	0.092	6.67776e-15
Srgn	4.35739e-19	-1.03313	0.692	0.571	7.39057e-15
Mrpl16	4.40811e-19	0.289541	0.241	0.039	7.47659e-15
Stoml2	4.80602e-19	0.367589	0.443	0.155	8.15149e-15
Bcap29	4.8186e-19	0.274594	0.324	0.08	8.17282e-15
Eif1ax	5.11156e-19	0.424192	0.439	0.156	8.66971e-15
Pold2	5.16163e-19	0.408815	0.304	0.073	8.75464e-15
Psma6	5.30492e-19	0.436676	0.561	0.248	8.99768e-15
Sox13	5.70871e-19	-0.440248	0.051	0.279	9.68254e-15
Sord	6.07064e-19	0.348577	0.312	0.081	1.02964e-14
Wls	6.10049e-19	0.327905	0.534	0.229	1.0347e-14
Orm1	6.10346e-19	-0.488752	0	0.168	1.03521e-14
Ap2s1	6.44802e-19	0.399822	0.636	0.313	1.09365e-14
Exosc5	6.44844e-19	0.356303	0.356	0.1	1.09372e-14
Lsm12	6.49856e-19	0.269873	0.435	0.15	1.10222e-14
Pin4	6.70615e-19	0.260817	0.332	0.088	1.13743e-14
H2-Aa	7.70994e-19	2.91626	0.174	0.041	1.30768e-14
Prom1	7.99426e-19	-0.253371	0.004	0.19	1.35591e-14
Snrnp40	8.18079e-19	0.462469	0.427	0.159	1.38754e-14
Calm1	8.71341e-19	0.308991	0.992	0.878	1.47788e-14
Rpa1	8.96815e-19	0.423531	0.419	0.155	1.52109e-14
Ppih	8.99885e-19	0.387616	0.411	0.224	1.52629e-14
Enoph1	9.28238e-19	0.267793	0.277	0.056	1.57438e-14
Tmem216	9.77527e-19	-0.734068	0.04	0.261	1.65798e-14
Ifi27l1	9.99944e-19	-1.02577	0.261	0.43	1.69601e-14
Cfl1	1.01075e-18	0.369661	0.992	0.951	1.71434e-14
Letm1	1.0401e-18	0.298159	0.407	0.138	1.76412e-14
Lgals3	1.07309e-18	0.4921	0.96	0.855	1.82007e-14
Zmat5	1.0903e-18	0.33538	0.308	0.073	1.84926e-14
Derl1	1.19326e-18	0.266036	0.66	0.34	2.02389e-14
Mgst2	1.20579e-18	-0.72734	0.107	0.342	2.04513e-14
Lmf2	1.21276e-18	0.420402	0.407	0.145	2.05696e-14
1110004F10Rik	1.28964e-18	0.377277	0.53	0.224	2.18735e-14
Puf60	1.52267e-18	0.282243	0.601	0.285	2.5826e-14
Fam65b	1.52486e-18	-1.10085	0.581	0.751	2.58631e-14
Rps19bp1	1.54442e-18	0.310073	0.289	0.063	2.61949e-14
Elp5	1.64554e-18	0.391282	0.304	0.072	2.79101e-14
Psmd1	1.70453e-18	0.350006	0.443	0.166	2.89105e-14
Acat2	1.73818e-18	0.272231	0.285	0.062	2.94813e-14
Mrpl18	1.80206e-18	0.355227	0.613	0.297	3.05647e-14
Hsp90aa1	1.88563e-18	0.251239	0.585	0.275	3.19822e-14
Stard3	1.90855e-18	0.395885	0.458	0.172	3.23709e-14
Naa25	2.16703e-18	0.258659	0.213	0.03	3.67551e-14
Atp6v1c1	2.3613e-18	0.327528	0.466	0.176	4.00501e-14
Hnrnpr	2.40339e-18	0.294755	0.538	0.24	4.07639e-14
Wbp5	2.51886e-18	0.356238	0.336	0.092	4.27224e-14
Tmem234	2.71983e-18	0.269066	0.905	0.69	4.6131e-14
Psmc2	2.78693e-18	0.341917	0.494	0.198	4.72691e-14
H2-Ab1	2.81551e-18	3.71908	0.17	0.064	4.77538e-14
Psma1	2.81701e-18	0.401797	0.692	0.385	4.77794e-14
Chrac1	2.84579e-18	0.445752	0.451	0.166	4.82675e-14
Dpm3	3.0103e-18	0.313017	0.308	0.077	5.10577e-14
Nsun2	3.06259e-18	0.286058	0.32	0.088	5.19445e-14
Ogfr	3.07429e-18	0.297036	0.368	0.11	5.2143e-14
Kpna2	3.17274e-18	0.904355	0.601	0.323	5.38128e-14
Ywhah	3.2095e-18	0.275917	0.715	0.398	5.44363e-14
Psmb9	3.23802e-18	0.259603	0.514	0.217	5.49201e-14
Ormdl2	3.32557e-18	0.274536	0.427	0.151	5.6405e-14
Tnfsf13b	3.53606e-18	-0.528746	0.02	0.223	5.99751e-14
Psmc5	3.56776e-18	0.405108	0.435	0.16	6.05128e-14
Ndufb4	3.74731e-18	0.360329	0.443	0.161	6.35582e-14
Hp	3.85678e-18	-0.904377	0.897	0.903	6.54148e-14
1700047M11Rik	3.87515e-18	-0.323732	0.008	0.198	6.57264e-14
Brcc3	3.898e-18	0.338203	0.379	0.118	6.61139e-14
Rbbp7	4.05911e-18	0.455988	0.534	0.243	6.88466e-14
Fam58b	4.17977e-18	0.42904	0.237	0.042	7.08931e-14
Pmm2	4.33512e-18	0.322534	0.344	0.099	7.3528e-14
Dctn5	4.4536e-18	0.250846	0.581	0.271	7.55375e-14
Adh5	4.78802e-18	0.362619	0.447	0.164	8.12096e-14
Suv420h2	4.96579e-18	0.277323	0.458	0.173	8.42247e-14
Unc119b	4.98566e-18	0.267137	0.273	0.057	8.45618e-14
Ear2	5.11185e-18	-0.746477	0.771	0.46	8.67021e-14
Itfg3	5.61433e-18	0.28556	0.391	0.126	9.52247e-14
Siglece	6.0592e-18	-0.836684	0.253	0.493	1.0277e-13
Nars	6.15745e-18	0.271925	0.526	0.225	1.04437e-13
Chit1	6.46077e-18	-0.594127	0.016	0.193	1.09581e-13
Use1	6.52318e-18	0.317773	0.51	0.215	1.1064e-13
Tpst2	6.7775e-18	0.253137	0.609	0.297	1.14953e-13
Rpp21	7.07559e-18	0.315993	0.458	0.179	1.20009e-13
Mien1	7.36083e-18	0.317093	0.415	0.144	1.24847e-13
Pgm1	7.60199e-18	0.28541	0.336	0.093	1.28937e-13
Selenbp1	8.21954e-18	0.406419	0.348	0.1	1.39412e-13
Rbmxl1	8.45765e-18	0.472985	0.395	0.147	1.4345e-13
9830166K06Rik	8.69772e-18	-0.300397	0.012	0.2	1.47522e-13
Pop5	8.90237e-18	0.344192	0.269	0.056	1.50993e-13
Ints4	9.11281e-18	0.268302	0.364	0.114	1.54562e-13
Eif4e2	9.19106e-18	0.276659	0.585	0.29	1.5589e-13
Mrpl48	9.34343e-18	0.338118	0.352	0.103	1.58474e-13
Gemin7	9.35011e-18	0.265993	0.391	0.133	1.58587e-13
BC100530	9.97192e-18	-1.34787	0	0.157	1.69134e-13
Cldn1	1.00259e-17	-0.35252	0.012	0.204	1.7005e-13
Elof1	1.0245e-17	0.369091	0.431	0.155	1.73765e-13
Mrps9	1.10596e-17	0.380847	0.344	0.103	1.87582e-13
Abhd11	1.12683e-17	0.381008	0.32	0.085	1.91122e-13
Ik	1.13277e-17	0.297669	0.506	0.213	1.92128e-13
Tacc3	1.24591e-17	0.451123	0.53	0.243	2.11319e-13
Tpra1	1.26278e-17	0.327906	0.344	0.099	2.1418e-13
Pfn1	1.26368e-17	-0.348489	1	0.996	2.14332e-13
Galnt11	1.26436e-17	0.298199	0.269	0.06	2.14449e-13
Dkc1	1.26905e-17	0.281502	0.462	0.306	2.15244e-13
Hsd17b10	1.38402e-17	0.416842	0.47	0.185	2.34744e-13
Polr2i	1.41526e-17	0.255815	0.292	0.069	2.40043e-13
Prr13	1.44596e-17	-0.941358	0.885	0.851	2.4525e-13
Emc7	1.48388e-17	0.383554	0.403	0.139	2.51681e-13
Gpr97	1.52485e-17	-0.604334	0.091	0.335	2.5863e-13
Tpi1	1.56483e-17	0.358264	0.593	0.287	2.6541e-13
Copa	1.61203e-17	0.308234	0.601	0.302	2.73416e-13
Mis18a	1.77136e-17	0.337197	0.34	0.098	3.00441e-13
Calhm2	1.80191e-17	0.254273	0.221	0.036	3.05623e-13
2010016I18Rik	1.93466e-17	-0.8283	0.202	0.411	3.28138e-13
Cops7a	1.93608e-17	0.354277	0.34	0.099	3.28379e-13
Pilra	1.97651e-17	-0.852238	0.652	0.754	3.35237e-13
Kti12	1.99252e-17	0.368484	0.198	0.032	3.37952e-13
Mdp1	1.99333e-17	0.407404	0.455	0.229	3.38088e-13
Rars	2.07482e-17	0.308367	0.336	0.097	3.5191e-13
Tomm5	2.0982e-17	0.335182	0.292	0.07	3.55875e-13
Erlin1	2.13227e-17	0.2844	0.36	0.114	3.61654e-13
Dpp7	2.17174e-17	0.375522	0.245	0.052	3.68348e-13
Usp5	2.48763e-17	0.370961	0.553	0.267	4.21927e-13
Cdca3	2.51667e-17	0.409529	0.419	0.163	4.26852e-13
Hmgn2	2.5385e-17	-1.30184	0.87	0.919	4.30555e-13
Nup37	2.58162e-17	0.353276	0.261	0.066	4.37868e-13
Commd9	2.64341e-17	0.388747	0.225	0.039	4.48348e-13
Gatc	2.76252e-17	0.282656	0.328	0.095	4.68551e-13
Bloc1s1	2.96265e-17	0.305838	0.387	0.131	5.02495e-13
Cd82	3.47737e-17	-1.12301	0.241	0.484	5.89796e-13
Ptplad2	3.51748e-17	-0.388406	0.526	0.325	5.966e-13
Mat2a	3.6684e-17	0.265857	0.482	0.197	6.22198e-13
Mrps30	3.76216e-17	0.319121	0.225	0.039	6.38101e-13
Ptpla	3.80402e-17	0.296383	0.221	0.038	6.452e-13
Clpp	3.92008e-17	0.305092	0.269	0.06	6.64885e-13
Hal	4.27039e-17	0.251048	0.257	0.056	7.243e-13
Stard3nl	4.3385e-17	0.295171	0.328	0.093	7.35852e-13
Mrps7	4.47484e-17	0.299161	0.32	0.087	7.58977e-13
Dhrs4	4.63975e-17	0.268814	0.261	0.055	7.86948e-13
Pycrl	5.19095e-17	0.319778	0.245	0.048	8.80438e-13
Srsf6	5.2123e-17	0.26666	0.601	0.299	8.84058e-13
Cers5	5.32043e-17	0.299828	0.372	0.119	9.02399e-13
Cdv3	6.01626e-17	0.334776	0.648	0.349	1.02042e-12
Pdlim4	6.02906e-17	0.262388	0.344	0.106	1.02259e-12
Tpm1	6.59484e-17	0.288411	0.312	0.083	1.11855e-12
Mad2l2	6.70534e-17	0.29698	0.257	0.054	1.13729e-12
Uba2	6.7398e-17	0.357085	0.486	0.204	1.14314e-12
H3f3a	6.76997e-17	0.259288	0.984	0.827	1.14826e-12
Fam213b	6.86911e-17	0.337925	0.209	0.032	1.16507e-12
Thoc6	7.19109e-17	0.377867	0.296	0.075	1.21968e-12
Kif20a	7.28375e-17	0.462785	0.399	0.164	1.2354e-12
F5	7.52843e-17	-0.323003	0.134	0.391	1.2769e-12
Txnl1	7.76845e-17	0.27693	0.47	0.193	1.31761e-12
Il1r2	7.94353e-17	-1.09975	0.036	0.238	1.3473e-12
Nsmce1	7.97598e-17	0.350426	0.431	0.161	1.35281e-12
Mrpl20	8.24748e-17	0.395253	0.47	0.194	1.39886e-12
Ddrgk1	8.37489e-17	0.283783	0.383	0.13	1.42047e-12
Mgll	8.91774e-17	-0.272935	0.004	0.172	1.51254e-12
Elp2	8.95972e-17	0.303363	0.387	0.135	1.51966e-12
Cox20	9.00372e-17	0.336851	0.439	0.167	1.52712e-12
Phf11a	9.49932e-17	0.33405	0.209	0.032	1.61118e-12
Fundc1	1.02877e-16	0.253543	0.352	0.11	1.7449e-12
Sesn1	1.03317e-16	0.34189	0.233	0.052	1.75236e-12
Ppie	1.05903e-16	0.365721	0.277	0.068	1.79622e-12
Copg1	1.09748e-16	0.265762	0.462	0.186	1.86144e-12
H2-M3	1.12377e-16	0.430745	0.213	0.039	1.90603e-12
Commd3	1.21606e-16	0.410289	0.431	0.163	2.06256e-12
Tmem141	1.22197e-16	0.439449	0.221	0.038	2.07258e-12
Zcchc17	1.3676e-16	0.352304	0.407	0.147	2.31958e-12
Tnfrsf14	1.44251e-16	0.324451	0.522	0.234	2.44664e-12
Ecm1	1.47808e-16	0.370259	0.186	0.026	2.50697e-12
Cdc20	1.48412e-16	0.622678	0.435	0.178	2.51722e-12
Coa3	1.60697e-16	0.331774	0.482	0.201	2.72558e-12
Scamp4	1.7406e-16	0.317745	0.289	0.073	2.95223e-12
Sdhc	1.76022e-16	0.316325	0.356	0.113	2.98552e-12
Mrto4	1.87752e-16	0.330811	0.336	0.101	3.18447e-12
Megf9	1.89897e-16	-0.753016	0.265	0.472	3.22085e-12
Sh3bp1	1.9087e-16	0.334127	0.613	0.313	3.23735e-12
Cpne2	1.96888e-16	-0.615336	0.261	0.517	3.33942e-12
Ngdn	1.99952e-16	0.405857	0.423	0.159	3.39138e-12
Oaz1-ps	2.19475e-16	0.329818	0.984	0.876	3.72252e-12
Tmem40	2.44879e-16	-0.745053	0.036	0.237	4.1534e-12
Dusp12	2.47645e-16	0.287461	0.182	0.024	4.2003e-12
Gm16894	2.51076e-16	-0.464757	0.055	0.256	4.25849e-12
Rnaseh2b	2.57836e-16	0.305104	0.364	0.122	4.37315e-12
Stub1	2.81053e-16	0.342403	0.561	0.272	4.76693e-12
Slc7a7	2.93935e-16	0.323302	0.439	0.17	4.98543e-12
Anapc13	2.94091e-16	0.256549	0.391	0.141	4.98808e-12
Prkx	3.07998e-16	0.257576	0.565	0.329	5.22395e-12
Cybb	3.25391e-16	-0.415656	0.957	0.837	5.51896e-12
Psmb7	3.34016e-16	0.351288	0.348	0.11	5.66524e-12
Gp49a	3.46097e-16	-0.731654	0.356	0.527	5.87015e-12
Ramp1	3.57615e-16	0.264646	0.387	0.135	6.06551e-12
Eif4e	3.68762e-16	0.254094	0.387	0.136	6.25457e-12
Ccnb1	3.73466e-16	0.694029	0.411	0.173	6.33435e-12
Mrps17	3.80342e-16	0.266102	0.391	0.138	6.45098e-12
Mrpl40	3.88167e-16	0.393511	0.455	0.237	6.5837e-12
Nudcd2	3.99e-16	0.252155	0.265	0.062	6.76745e-12
Nudt14	4.01634e-16	0.339202	0.202	0.032	6.81211e-12
Vrk1	4.02964e-16	0.264228	0.561	0.272	6.83467e-12
Mavs	4.07566e-16	0.287086	0.206	0.033	6.91273e-12
Tysnd1	4.09184e-16	0.297947	0.277	0.069	6.94017e-12
Adipor1	4.13813e-16	-1.02407	0.787	0.824	7.01868e-12
Bcl7b	4.16486e-16	0.323664	0.395	0.141	7.06402e-12
Ppp2r5d	4.2141e-16	0.280015	0.364	0.124	7.14754e-12
Imp3	4.27795e-16	0.315723	0.213	0.037	7.25583e-12
Fdps	4.42384e-16	0.463968	0.494	0.218	7.50328e-12
Tbl3	4.49815e-16	0.352634	0.245	0.055	7.62931e-12
Ccs	4.51388e-16	0.416751	0.269	0.063	7.65599e-12
Clec5a	5.71231e-16	-0.713776	0.427	0.565	9.68865e-12
Mrpl27	5.99317e-16	0.467268	0.68	0.479	1.0165e-11
Ltb4r1	6.14486e-16	-0.97203	0.458	0.563	1.04223e-11
Gsto1	6.6208e-16	0.446774	0.356	0.118	1.12295e-11
Pdrg1	6.9125e-16	0.413274	0.292	0.077	1.17243e-11
Tsnax	7.29468e-16	0.361487	0.308	0.092	1.23725e-11
Ltb	7.91965e-16	-0.856987	0.04	0.238	1.34325e-11
Mrps22	7.95239e-16	0.302366	0.206	0.037	1.3488e-11
Bub3	8.03107e-16	0.33938	0.573	0.291	1.36215e-11
Fen1	8.13934e-16	0.468202	0.387	0.156	1.38051e-11
Pon2	8.4926e-16	0.356871	0.462	0.197	1.44043e-11
Mcm6	8.80927e-16	0.571516	0.49	0.248	1.49414e-11
Prmt7	9.07188e-16	0.278828	0.194	0.032	1.53868e-11
Il18rap	9.1497e-16	-0.362549	0.036	0.238	1.55188e-11
Aimp1	9.34336e-16	0.384134	0.312	0.092	1.58473e-11
Ppp5c	1.08514e-15	0.293516	0.356	0.117	1.84051e-11
Rangap1	1.11952e-15	0.32556	0.549	0.384	1.89882e-11
Slc27a4	1.13486e-15	-0.408488	0.067	0.285	1.92484e-11
Aimp2	1.19118e-15	0.271138	0.237	0.049	2.02035e-11
Rpp30	1.23361e-15	0.285601	0.285	0.076	2.09233e-11
Pycr2	1.30902e-15	0.38234	0.328	0.1	2.22023e-11
Hsd3b7	1.31023e-15	0.353305	0.32	0.095	2.22229e-11
Thap7	1.33651e-15	0.279252	0.289	0.076	2.26685e-11
B430306N03Rik	1.33858e-15	-0.682334	0.597	0.645	2.27036e-11
Mpdu1	1.34566e-15	0.252837	0.364	0.123	2.28238e-11
Kif22	1.35046e-15	0.593459	0.368	0.163	2.29051e-11
Txndc12	1.36716e-15	0.258946	0.336	0.105	2.31883e-11
Rps27	1.36918e-15	0.761543	0.364	0.128	2.32226e-11
Bcl6	1.48244e-15	-0.604973	0.458	0.523	2.51437e-11
Cenpm	1.55726e-15	0.301579	0.249	0.06	2.64127e-11
B230208H11Rik	1.66387e-15	-0.599675	0.522	0.636	2.82209e-11
Pdf	1.7779e-15	0.285679	0.277	0.072	3.01549e-11
Sumo3	1.80002e-15	0.312755	0.462	0.194	3.05301e-11
Sytl1	1.80064e-15	-0.645399	0.016	0.187	3.05406e-11
Arl6ip1	1.87144e-15	0.294206	0.81	0.536	3.17414e-11
Plaur	1.97113e-15	-1.01733	0.747	0.785	3.34323e-11
Dhrs7	1.97509e-15	-1.1171	0.458	0.548	3.34995e-11
Hat1	2.00975e-15	0.390079	0.348	0.119	3.40873e-11
Pag1	2.41697e-15	-0.258572	0.34	0.536	4.09943e-11
Mx1	2.53917e-15	0.287347	0.285	0.116	4.30669e-11
Syngr2	2.7449e-15	0.307224	0.684	0.393	4.65563e-11
Tssc1	2.78707e-15	0.361298	0.316	0.094	4.72715e-11
Pdlim7	2.80099e-15	-0.891392	0.182	0.384	4.75076e-11
1110038B12Rik	2.92827e-15	0.451192	0.241	0.055	4.96664e-11
Ednra	2.99709e-15	-0.444463	0.032	0.198	5.08336e-11
Mcm7	3.02519e-15	0.42746	0.462	0.211	5.13102e-11
Mid1ip1	3.03053e-15	-0.399868	0.577	0.397	5.14008e-11
Tsta3	3.08715e-15	0.340983	0.328	0.103	5.23611e-11
Dhx15	3.24639e-15	0.279318	0.502	0.23	5.5062e-11
Map1s	3.50229e-15	0.283859	0.312	0.094	5.94023e-11
Sar1b	3.59516e-15	0.288444	0.383	0.139	6.09775e-11
Polr2h	3.62294e-15	0.341344	0.229	0.049	6.14486e-11
Mrps10	4.0267e-15	0.322045	0.233	0.05	6.82969e-11
Gaa	4.17756e-15	0.298624	0.368	0.168	7.08556e-11
Tcf19	4.20437e-15	0.402531	0.372	0.131	7.13103e-11
Olfm4	4.9976e-15	-2.50334	0.083	0.255	8.47644e-11
Mcm5	5.3376e-15	0.439818	0.502	0.331	9.05311e-11
Pgam1	5.47901e-15	0.274777	0.779	0.499	9.29294e-11
Dnaja3	5.6525e-15	0.293042	0.273	0.073	9.5872e-11
Knstrn	5.65933e-15	0.322306	0.391	0.159	9.59878e-11
Chmp6	6.12993e-15	0.304375	0.316	0.097	1.0397e-10
Il1rn	6.23727e-15	-1.02662	0.091	0.282	1.0579e-10
Hadhb	6.5425e-15	0.309713	0.379	0.138	1.10967e-10
Cnih	6.86031e-15	0.256602	0.277	0.074	1.16358e-10
Tex264	7.19174e-15	0.329223	0.213	0.041	1.21979e-10
Trpm2	7.54609e-15	-0.597512	0.186	0.395	1.27989e-10
Scamp3	7.72394e-15	0.282543	0.403	0.155	1.31006e-10
U2af1	7.79199e-15	0.385177	0.569	0.291	1.3216e-10
Zbtb8os	7.81555e-15	0.286647	0.265	0.067	1.3256e-10
Gtf2f1	7.86742e-15	0.287812	0.411	0.163	1.33439e-10
Jagn1	7.96422e-15	0.31871	0.237	0.052	1.35081e-10
Ifi47	9.34298e-15	0.444283	0.265	0.075	1.58466e-10
Mettl9	9.49642e-15	-0.65692	0.352	0.48	1.61069e-10
Exosc8	9.70912e-15	0.377991	0.387	0.159	1.64676e-10
Mcu	9.9566e-15	-0.458175	0.277	0.452	1.68874e-10
Seh1l	1.01385e-14	0.280848	0.285	0.081	1.71959e-10
2700029M09Rik	1.05058e-14	0.275593	0.447	0.188	1.78189e-10
Polr2c	1.11802e-14	0.303372	0.383	0.142	1.89627e-10
Apex1	1.16008e-14	0.351487	0.241	0.062	1.96762e-10
Gpr137b-ps	1.27572e-14	-0.44027	0.439	0.285	2.16375e-10
Nosip	1.29221e-14	0.254667	0.605	0.342	2.19171e-10
Tax1bp3	1.29559e-14	0.363477	0.245	0.057	2.19744e-10
Slc9a3r2	1.30865e-14	-0.782954	0.02	0.187	2.2196e-10
Phf11b	1.36079e-14	0.262397	0.194	0.033	2.30804e-10
Eno1	1.41804e-14	0.308101	0.937	0.753	2.40513e-10
Gpn1	1.43963e-14	0.317738	0.206	0.039	2.44176e-10
Rnf167	1.44015e-14	-0.902685	0.474	0.56	2.44263e-10
Tars2	1.53798e-14	0.313535	0.399	0.223	2.60856e-10
Cfdp1	1.60269e-14	0.322831	0.352	0.123	2.71833e-10
Ssna1	1.60889e-14	0.306577	0.581	0.302	2.72884e-10
Gtl3	1.64883e-14	0.298926	0.277	0.077	2.79658e-10
Pcna	1.65098e-14	0.251309	0.462	0.203	2.80022e-10
Tinagl1	1.72898e-14	-0.563751	0.012	0.166	2.93252e-10
Dfna5	1.73296e-14	-0.970283	0.071	0.251	2.93927e-10
Pmpcb	1.8146e-14	0.345227	0.336	0.112	3.07775e-10
Incenp	1.8278e-14	0.337877	0.47	0.221	3.10014e-10
Dnase2a	1.84387e-14	0.323952	0.648	0.542	3.12738e-10
Gpr108	1.9067e-14	0.280212	0.506	0.237	3.23395e-10
Kif23	1.92917e-14	0.354624	0.447	0.193	3.27207e-10
Trnau1ap	1.97213e-14	0.295879	0.273	0.074	3.34492e-10
A430005L14Rik	2.01587e-14	0.285799	0.308	0.094	3.41912e-10
Eif2b1	2.0576e-14	0.335465	0.328	0.164	3.48989e-10
Gngt2	2.1376e-14	-0.338211	0.245	0.12	3.62559e-10
Renbp	2.29622e-14	0.319768	0.233	0.052	3.89461e-10
Dynlt1b	2.37628e-14	-0.251335	0.561	0.362	4.0304e-10
Tkt	2.40011e-14	-0.584714	0.917	0.839	4.07082e-10
Cdca8	2.42909e-14	0.554344	0.451	0.212	4.11998e-10
Exosc7	2.45298e-14	0.458889	0.36	0.13	4.16049e-10
Mcts1	2.50576e-14	0.272288	0.352	0.123	4.25002e-10
Mrpl22	2.60942e-14	0.343176	0.237	0.061	4.42584e-10
Gpsm2	2.66264e-14	0.264858	0.241	0.066	4.51611e-10
Wdr61	2.70718e-14	0.385543	0.364	0.133	4.59164e-10
Myc	2.80315e-14	0.308332	0.241	0.057	4.75442e-10
Ufc1	2.93917e-14	0.309245	0.364	0.131	4.98512e-10
Map4k2	3.01731e-14	-0.733815	0.332	0.542	5.11767e-10
Atp1a3	3.08435e-14	-0.275394	0.87	0.645	5.23137e-10
Gmfg	3.16664e-14	-0.34288	0.794	0.654	5.37094e-10
Phgdh	3.18499e-14	0.667665	0.292	0.108	5.40205e-10
Gm5506	3.25326e-14	0.260534	0.98	0.856	5.51786e-10
Plgrkt	3.52873e-14	0.294234	0.32	0.104	5.98508e-10
Gpaa1	3.56427e-14	0.388934	0.356	0.13	6.04536e-10
2310005G13Rik	3.70495e-14	-0.291443	0.008	0.154	6.28397e-10
Rab3d	3.87074e-14	-0.730183	0.427	0.561	6.56516e-10
0610012G03Rik	3.8811e-14	0.262001	0.605	0.404	6.58273e-10
Ndufa1	4.03139e-14	0.317598	0.466	0.21	6.83764e-10
Nenf	4.39709e-14	0.268151	0.174	0.026	7.4579e-10
Vps72	4.4066e-14	0.26634	0.443	0.194	7.47403e-10
Mcm3	4.43314e-14	0.445188	0.407	0.186	7.51905e-10
Timm8a1	4.46739e-14	0.260637	0.178	0.033	7.57714e-10
Emc4	4.77735e-14	0.340547	0.344	0.119	8.10286e-10
Scfd1	4.79135e-14	0.256747	0.308	0.097	8.12661e-10
Ufsp2	4.80908e-14	0.288656	0.344	0.119	8.15668e-10
Trib1	4.99506e-14	-0.615082	0.296	0.424	8.47212e-10
Igbp1	5.08111e-14	0.261229	0.296	0.089	8.61807e-10
Nkiras2	5.98018e-14	0.259781	0.435	0.185	1.0143e-09
Tmem97	6.18548e-14	0.343299	0.221	0.05	1.04912e-09
Parl	6.43169e-14	0.409087	0.383	0.159	1.09088e-09
Stip1	6.46798e-14	0.313693	0.415	0.182	1.09703e-09
Ceacam1	6.9607e-14	-0.503677	0.609	0.684	1.1806e-09
Clec4b1	7.41033e-14	0.415823	0.245	0.062	1.25687e-09
Nudt9	7.54408e-14	0.256758	0.221	0.049	1.27955e-09
Rdm1	7.74191e-14	0.294575	0.269	0.074	1.3131e-09
Cnpy4	7.90825e-14	0.340106	0.304	0.114	1.34132e-09
Mrpl14	8.07e-14	0.254494	0.364	0.137	1.36875e-09
Mfsd10	8.57387e-14	0.365751	0.462	0.21	1.45421e-09
Pfdn2	8.63115e-14	0.284611	0.296	0.091	1.46393e-09
Stfa2l1	9.02948e-14	-1.17961	0	0.122	1.53149e-09
BC056474	9.47078e-14	0.253229	0.368	0.141	1.60634e-09
Tsen34	9.52045e-14	0.266486	0.233	0.055	1.61476e-09
Crcp	9.64383e-14	0.293944	0.304	0.098	1.63569e-09
Sh2d3c	9.69514e-14	-0.876951	0.431	0.561	1.64439e-09
Dgat1	9.80707e-14	-0.743731	0.103	0.31	1.66338e-09
Ddt	9.87988e-14	0.275933	0.178	0.029	1.67573e-09
S100a1	1.01233e-13	0.34721	0.372	0.144	1.71701e-09
Nop56	1.12364e-13	0.380012	0.395	0.163	1.9058e-09
Nudt5	1.17702e-13	0.286785	0.316	0.108	1.99634e-09
Reep4	1.37864e-13	0.372305	0.336	0.118	2.33831e-09
Vps41	1.40264e-13	0.284992	0.304	0.099	2.37901e-09
Hn1l	1.45552e-13	0.367061	0.375	0.167	2.4687e-09
Gadd45a	1.45801e-13	-0.533922	0.075	0.284	2.47294e-09
Gpsm3	1.53484e-13	-0.411642	0.652	0.692	2.60325e-09
Akr1c13	1.54086e-13	0.268835	0.166	0.025	2.61345e-09
Akip1	1.58005e-13	0.28943	0.249	0.064	2.67992e-09
Actg1	1.76682e-13	0.406912	0.996	0.987	2.9967e-09
Hexb	1.79538e-13	0.260202	0.553	0.288	3.04514e-09
Hist1h1b	1.8031e-13	0.456259	0.324	0.114	3.05824e-09
Tmem123	1.93595e-13	0.371784	0.482	0.232	3.28357e-09
Rgcc	1.94071e-13	-0.858524	0.17	0.257	3.29164e-09
Srm	1.94424e-13	0.467528	0.229	0.061	3.29763e-09
Enpp5	1.97792e-13	-0.282459	0.004	0.143	3.35475e-09
H2afx	2.04402e-13	0.525851	0.51	0.261	3.46686e-09
Ube2b	2.22716e-13	-0.33181	0.617	0.439	3.77749e-09
Cops4	2.4956e-13	0.275511	0.364	0.139	4.23279e-09
Ica1	2.55531e-13	-0.35839	0.02	0.176	4.33407e-09
Klrk1	2.56946e-13	0.268225	0.115	0.01	4.35806e-09
Ypel5	2.63522e-13	-0.28239	0.644	0.495	4.4696e-09
Gm9846	2.78717e-13	0.41132	0.704	0.437	4.72733e-09
Ap1s1	2.84906e-13	0.291665	0.407	0.169	4.8323e-09
Rfc5	2.88031e-13	0.382663	0.356	0.139	4.88529e-09
C3ar1	3.32312e-13	0.356369	0.142	0.026	5.63634e-09
Snhg3	3.32471e-13	0.346464	0.261	0.073	5.63904e-09
Isyna1	3.33684e-13	0.314639	0.368	0.142	5.65962e-09
Aurka	3.48233e-13	0.462638	0.356	0.157	5.90638e-09
Ncaph	3.51174e-13	0.3011	0.356	0.138	5.95627e-09
Fam173a	3.55354e-13	0.330101	0.447	0.2	6.02716e-09
Itgb2	3.60475e-13	-0.684737	0.941	0.937	6.11401e-09
Ppapdc1b	3.7084e-13	0.262953	0.277	0.082	6.28982e-09
Hdac3	3.7544e-13	0.281636	0.375	0.151	6.36785e-09
Hist2h2aa1	3.93965e-13	-0.742623	0.462	0.408	6.68203e-09
Aarsd1	5.1998e-13	0.392658	0.312	0.118	8.81938e-09
Batf	5.43549e-13	0.348892	0.221	0.052	9.21913e-09
Oaz1	5.45696e-13	0.253769	0.968	0.816	9.25555e-09
Mvd	5.61233e-13	0.381612	0.285	0.101	9.51907e-09
Pbxip1	5.61289e-13	-0.774471	0.383	0.517	9.52003e-09
Cfb	5.85044e-13	0.34368	0.123	0.018	9.92294e-09
Yif1a	6.10549e-13	0.315464	0.273	0.086	1.03555e-08
Wdr83	6.15424e-13	0.278752	0.237	0.061	1.04382e-08
Hist1h4d	6.70732e-13	0.460479	0.545	0.287	1.13763e-08
Lztr1	6.75108e-13	0.255672	0.237	0.076	1.14505e-08
Vps16	6.77479e-13	0.288281	0.36	0.143	1.14907e-08
Aurkb	7.55377e-13	0.495425	0.364	0.173	1.2812e-08
Dcxr	7.93242e-13	0.261521	0.206	0.045	1.34542e-08
Itgam	8.01071e-13	-0.705196	0.787	0.826	1.3587e-08
Pus1	8.30875e-13	0.281211	0.249	0.072	1.40925e-08
Rae1	8.37448e-13	0.322875	0.34	0.125	1.4204e-08
Rqcd1	8.39157e-13	0.251023	0.443	0.205	1.42329e-08
Adi1	8.50757e-13	0.26389	0.368	0.18	1.44297e-08
Pilrb1	8.59466e-13	-0.705299	0.372	0.603	1.45774e-08
Mrps11	9.28923e-13	0.252359	0.217	0.051	1.57555e-08
Gipc1	9.82683e-13	0.370904	0.486	0.248	1.66673e-08
Emr4	1.10884e-12	-0.41913	0.336	0.178	1.88071e-08
Ruvbl2	1.14994e-12	0.324337	0.344	0.132	1.95042e-08
Mcoln1	1.38987e-12	0.267976	0.364	0.144	2.35736e-08
Urod	1.40729e-12	0.300525	0.292	0.095	2.38691e-08
Retsat	1.49617e-12	0.257931	0.265	0.079	2.53766e-08
Noc4l	1.5019e-12	0.304915	0.285	0.114	2.54737e-08
Txndc15	1.55954e-12	0.301258	0.281	0.091	2.64513e-08
Zfp207	1.61305e-12	0.2946	0.731	0.508	2.73589e-08
Poldip2	1.65521e-12	0.279392	0.304	0.104	2.8074e-08
B430010I23Rik	1.65635e-12	-0.648783	0.253	0.424	2.80933e-08
Cd37	1.67047e-12	-0.893005	0.526	0.608	2.83329e-08
Eif2b2	1.70167e-12	0.268676	0.328	0.119	2.88621e-08
Cops5	1.81468e-12	0.345073	0.352	0.138	3.07788e-08
C5ar2	2.01885e-12	-0.401677	0.206	0.402	3.42417e-08
Med10	2.07147e-12	0.261154	0.387	0.162	3.51342e-08
Slc16a3	2.10342e-12	-0.901324	0.395	0.505	3.56761e-08
Cd55	2.12637e-12	-0.458001	0.024	0.166	3.60653e-08
Zmpste24	2.1461e-12	-0.695586	0.225	0.378	3.64e-08
Cdkn3	2.19279e-12	0.341392	0.336	0.125	3.71918e-08
Slfn1	2.20973e-12	-1.16838	0.336	0.48	3.74793e-08
Apopt1	2.27327e-12	0.256128	0.83	0.652	3.8557e-08
Gins2	2.28578e-12	0.333629	0.217	0.055	3.87692e-08
D1Ertd622e	2.47615e-12	-0.457727	0.538	0.379	4.1998e-08
Nlrp3	2.69899e-12	-0.251151	0.395	0.21	4.57776e-08
Pcyt2	2.70566e-12	0.275997	0.328	0.12	4.58907e-08
Qdpr	2.79937e-12	0.268168	0.213	0.051	4.74801e-08
Tsc22d3	2.88399e-12	-0.708582	0.498	0.38	4.89154e-08
Nrm	3.04686e-12	0.32067	0.36	0.143	5.16778e-08
Lsm3	3.23904e-12	0.364026	0.332	0.124	5.49373e-08
Max	3.24661e-12	-0.749118	0.53	0.526	5.50657e-08
Plk1	3.57515e-12	0.521061	0.348	0.181	6.06381e-08
Wdr74	3.63773e-12	0.272248	0.221	0.056	6.16995e-08
Mogat2	3.73597e-12	-0.345286	0.004	0.126	6.33658e-08
Cnn2	3.74896e-12	-0.706434	0.905	0.894	6.35861e-08
Coq9	3.7752e-12	0.286966	0.261	0.081	6.40312e-08
Ppa2	3.7987e-12	0.341996	0.304	0.11	6.44298e-08
Msrb1	3.84919e-12	-0.47966	0.858	0.883	6.52861e-08
Memo1	3.95527e-12	0.292014	0.257	0.077	6.70853e-08
Nde1	4.51231e-12	0.329282	0.304	0.113	7.65333e-08
Qars	4.7598e-12	0.287109	0.296	0.104	8.0731e-08
Tex261	4.96195e-12	0.275821	0.296	0.101	8.41596e-08
Gps1	5.07489e-12	0.298222	0.348	0.138	8.60752e-08
Slc25a1	5.31839e-12	0.251017	0.285	0.094	9.02052e-08
Pi16	5.44159e-12	-0.878537	0.443	0.561	9.22948e-08
Rhog	5.67988e-12	-0.264305	0.881	0.687	9.63364e-08
Golim4	5.97777e-12	-0.349946	0.17	0.373	1.01389e-07
Pde2a	6.1601e-12	-0.740687	0.411	0.555	1.04481e-07
Cap1	6.32057e-12	-0.511098	0.957	0.925	1.07203e-07
Tradd	6.42762e-12	0.251192	0.257	0.077	1.09019e-07
Gmnn	6.73708e-12	0.39544	0.348	0.143	1.14268e-07
Rpl30	7.39324e-12	0.294386	0.202	0.048	1.25397e-07
Arhgdib	7.47734e-12	-0.541626	0.98	0.968	1.26823e-07
Pla2g7	7.69251e-12	-0.574551	0.561	0.381	1.30473e-07
Mrps35	7.86949e-12	0.279734	0.237	0.067	1.33474e-07
Plscr1	8.01445e-12	-0.45501	0.134	0.325	1.35933e-07
H2-T23	8.53965e-12	0.25289	0.992	0.923	1.44841e-07
Ruvbl1	8.62437e-12	0.329972	0.233	0.069	1.46278e-07
Dynlt1a	8.76451e-12	0.288341	0.237	0.067	1.48655e-07
Cep19	1.07585e-11	-0.583667	0.067	0.241	1.82475e-07
Sqle	1.11408e-11	0.281417	0.213	0.06	1.8896e-07
Cox19	1.12285e-11	0.336509	0.233	0.066	1.90447e-07
Pafah1b3	1.16823e-11	0.279926	0.115	0.011	1.98143e-07
Rn45s	1.25675e-11	0.323266	1	1	2.13157e-07
Slfn2	1.35967e-11	-0.457771	0.885	0.729	2.30614e-07
Ccr1	1.38608e-11	-1.12922	0.395	0.442	2.35093e-07
Msra	1.39331e-11	-0.879675	0.277	0.485	2.36319e-07
Dnajc9	1.40483e-11	0.381944	0.427	0.199	2.38274e-07
Cdca4	1.44781e-11	0.278084	0.423	0.198	2.45563e-07
Fcgr4	1.50801e-11	-1.36163	0.055	0.209	2.55773e-07
Nup62	1.52505e-11	0.297014	0.312	0.12	2.58663e-07
Mctp1	1.54974e-11	-0.452021	0.375	0.534	2.62851e-07
Apool	1.56569e-11	0.271021	0.178	0.038	2.65556e-07
Ppif	1.69562e-11	0.299205	0.217	0.06	2.87594e-07
Psmd5	1.73195e-11	0.283602	0.356	0.148	2.93756e-07
Prss57	1.79909e-11	-0.462736	0.051	0.207	3.05143e-07
Sec23b	1.96572e-11	0.274843	0.316	0.124	3.33405e-07
Aaas	1.97198e-11	0.310583	0.281	0.104	3.34468e-07
Nudt16l1	2.07676e-11	0.255944	0.277	0.093	3.5224e-07
Sorl1	2.10137e-11	-0.35014	0.439	0.652	3.56414e-07
Farsa	2.2087e-11	0.291868	0.312	0.117	3.74617e-07
Etfdh	2.35357e-11	0.266264	0.273	0.094	3.9919e-07
Slc35b2	2.46109e-11	0.278199	0.387	0.172	4.17425e-07
Vamp5	2.56183e-11	-0.282962	0.111	0.292	4.34512e-07
Ss18	2.62853e-11	0.261759	0.348	0.144	4.45826e-07
Ckap2l	2.65555e-11	0.284911	0.368	0.164	4.50409e-07
Wdr55	2.69564e-11	0.283394	0.146	0.03	4.57208e-07
Cpq	2.98185e-11	0.257272	0.241	0.073	5.05752e-07
Csrp2	3.01083e-11	0.256135	0.19	0.044	5.10666e-07
Znrd1	3.10421e-11	0.255957	0.265	0.087	5.26504e-07
Tcp11l2	3.15028e-11	-0.839676	0.206	0.384	5.34319e-07
Itgal	3.48345e-11	-0.669753	0.632	0.607	5.90828e-07
2210016L21Rik	3.50884e-11	0.257734	0.245	0.075	5.95135e-07
Bub1b	3.92947e-11	0.254932	0.292	0.116	6.66477e-07
Tor2a	4.20911e-11	0.267695	0.289	0.103	7.13907e-07
Hist1h2bc	4.26129e-11	-0.287582	0.304	0.13	7.22758e-07
Fam32a	4.35652e-11	-0.426858	0.617	0.447	7.38909e-07
Tmx2	4.48321e-11	0.297194	0.356	0.162	7.60398e-07
Rrm1	4.59517e-11	0.279286	0.415	0.217	7.79387e-07
Ascc1	4.65524e-11	0.274703	0.186	0.045	7.89575e-07
Cmtm6	4.69765e-11	-0.762758	0.688	0.619	7.96768e-07
Rab44	4.85098e-11	-0.49411	0.292	0.433	8.22775e-07
Eci1	4.97589e-11	0.266053	0.257	0.091	8.4396e-07
Cd14	5.73704e-11	-0.497753	0.593	0.465	9.73059e-07
Rnaseh1	6.02623e-11	0.273658	0.146	0.025	1.02211e-06
Gypc	6.02809e-11	0.267989	0.217	0.064	1.02243e-06
F630028O10Rik	6.17063e-11	-0.509139	0.427	0.542	1.0466e-06
Rassf1	6.94353e-11	0.252252	0.285	0.101	1.17769e-06
Sgms2	7.11666e-11	-0.447291	0.439	0.596	1.20706e-06
Bcat2	7.34752e-11	0.292685	0.391	0.179	1.24621e-06
Nfs1	7.36696e-11	0.282002	0.249	0.083	1.24951e-06
Gpi1	8.30282e-11	-0.739609	0.957	0.946	1.40824e-06
Trappc4	8.44679e-11	0.266211	0.387	0.175	1.43266e-06
Il17ra	8.50077e-11	-0.335955	0.802	0.604	1.44182e-06
Guk1	9.44305e-11	0.365079	0.241	0.077	1.60164e-06
Tuba8	9.82604e-11	-0.498096	0.028	0.151	1.6666e-06
Gabarapl2	1.06441e-10	-0.253555	0.498	0.334	1.80534e-06
Dok3	1.06644e-10	-0.541048	0.735	0.683	1.80879e-06
Cd44	1.13087e-10	-0.377004	0.85	0.697	1.91806e-06
Tubg1	1.13845e-10	0.35503	0.296	0.114	1.93092e-06
Ccdc28b	1.19774e-10	0.291151	0.261	0.088	2.03149e-06
Cldn15	1.21833e-10	-0.284449	0.016	0.136	2.06641e-06
Numb	1.32832e-10	-0.501292	0.19	0.387	2.25296e-06
Nudt4	1.42908e-10	-0.786051	0.281	0.391	2.42387e-06
Fgr	1.47513e-10	-0.771496	0.585	0.706	2.50196e-06
Il16	1.51312e-10	-0.609918	0.652	0.626	2.56641e-06
Rnf144a	1.63491e-10	-0.31597	0.051	0.209	2.77298e-06
Mrps18b	1.74377e-10	0.263952	0.186	0.045	2.9576e-06
Gpx3	1.81352e-10	0.32846	0.209	0.064	3.0759e-06
Rasl11b	1.85291e-10	-0.298196	0.004	0.114	3.14273e-06
Lmo4	1.91138e-10	-0.695123	0.47	0.617	3.24189e-06
Alg3	2.10613e-10	0.26175	0.178	0.042	3.57221e-06
Slc25a17	2.32155e-10	0.291392	0.344	0.147	3.93757e-06
Cdc123	2.48695e-10	0.311101	0.897	0.779	4.21811e-06
1110058L19Rik	2.5239e-10	0.278666	0.198	0.055	4.28079e-06
Dusp1	2.52821e-10	-1.0534	0.798	0.706	4.28809e-06
Asf1b	2.53481e-10	0.377108	0.427	0.213	4.29929e-06
Hmga2-ps1	2.81295e-10	0.33939	0.455	0.253	4.77104e-06
Triobp	3.12488e-10	-0.729697	0.399	0.47	5.30011e-06
Fam132a	3.13232e-10	-0.532278	0.063	0.207	5.31273e-06
Stk17b	3.17354e-10	-0.703439	0.482	0.514	5.38265e-06
Top2a	3.29024e-10	0.438064	0.482	0.293	5.58057e-06
Ube2c	3.43795e-10	0.679518	0.518	0.349	5.8311e-06
Tnfrsf1a	3.51511e-10	-0.312334	0.692	0.492	5.96199e-06
Prps1	3.63746e-10	0.253702	0.257	0.091	6.16949e-06
Tk1	3.70295e-10	0.342953	0.375	0.176	6.28057e-06
Malsu1	3.96898e-10	0.265294	0.249	0.085	6.73179e-06
Slc31a2	4.13629e-10	-0.642686	0.285	0.347	7.01556e-06
Map1lc3b	4.23323e-10	-0.329634	0.87	0.702	7.17998e-06
Cdk2ap2	4.32135e-10	-0.746466	0.846	0.756	7.32944e-06
Mmadhc	4.39898e-10	0.2914	0.36	0.161	7.46111e-06
Arl2	4.4755e-10	0.282967	0.241	0.08	7.5909e-06
Mad2l1	4.52104e-10	0.261784	0.383	0.179	7.66813e-06
Mcm2	4.55406e-10	0.323521	0.332	0.156	7.72414e-06
Nelfe	4.5936e-10	0.27895	0.281	0.107	7.79121e-06
Cdc16	4.785e-10	0.252737	0.233	0.088	8.11584e-06
Gapdh	4.80707e-10	0.269396	0.984	0.911	8.15327e-06
Hibadh	5.33928e-10	0.259579	0.324	0.137	9.05596e-06
Ceacam10	6.29427e-10	-0.624674	0.47	0.576	1.06757e-05
Haus4	6.59127e-10	0.290912	0.241	0.088	1.11794e-05
Raf1	6.69726e-10	-0.645249	0.561	0.473	1.13592e-05
Clec4b2	7.27148e-10	-0.301651	0.016	0.126	1.23332e-05
Sfpi1	7.93516e-10	-0.292299	0.885	0.743	1.34588e-05
Dhrs9	8.04853e-10	-0.42457	0.028	0.157	1.36511e-05
Fam162a	8.18648e-10	0.252818	0.249	0.086	1.38851e-05
Hist1h1c	9.39696e-10	-0.896421	0.636	0.555	1.59382e-05
Rtn3	1.04231e-09	-0.273312	0.688	0.547	1.76787e-05
Cdt1	1.11725e-09	0.282075	0.304	0.131	1.89496e-05
Dus1l	1.19879e-09	0.259818	0.225	0.077	2.03326e-05
Ercc1	1.20187e-09	0.250896	0.206	0.061	2.0385e-05
Rogdi	1.28882e-09	-0.509092	0.332	0.498	2.18597e-05
Taf6	1.3098e-09	0.266596	0.312	0.133	2.22156e-05
Ppil1	1.31153e-09	0.301072	0.356	0.162	2.22448e-05
Mboat7	1.31597e-09	-0.59212	0.553	0.505	2.23201e-05
Stat3	1.35636e-09	-0.253354	0.672	0.507	2.30052e-05
Gpn3	1.38438e-09	0.319294	0.162	0.039	2.34804e-05
Tarbp2	1.38631e-09	0.275473	0.182	0.052	2.35133e-05
Fgl2	1.42499e-09	-0.89185	0.336	0.323	2.41693e-05
Capn1	1.44909e-09	-0.586721	0.462	0.513	2.4578e-05
Myh9	1.57412e-09	-0.376579	0.866	0.911	2.66987e-05
Tipin	1.58579e-09	0.395595	0.344	0.166	2.68966e-05
Ddx60	1.59038e-09	-0.378429	0.083	0.228	2.69744e-05
Pisd-ps1	1.69077e-09	-0.254403	0.411	0.242	2.86771e-05
Btg2	1.6937e-09	-0.783005	0.652	0.594	2.87269e-05
Ccrl2	1.7374e-09	-0.474832	0.332	0.178	2.9468e-05
Nr4a1	1.74533e-09	-0.778559	0.478	0.312	2.96025e-05
Tmem154	1.84115e-09	-0.709072	0.269	0.436	3.12278e-05
Egr1	1.87127e-09	-1.44061	0.119	0.229	3.17387e-05
Zfyve21	2.108e-09	0.252746	0.134	0.025	3.57539e-05
Gapt	2.13465e-09	-0.286331	0.557	0.379	3.62059e-05
Capza1	2.18131e-09	-0.270882	0.933	0.791	3.69972e-05
Anxa3	2.22591e-09	-0.617721	0.597	0.585	3.77536e-05
Rfc3	2.26465e-09	0.388878	0.213	0.087	3.84107e-05
Akna	2.70637e-09	-0.479108	0.743	0.685	4.59027e-05
Clec2i	2.72211e-09	0.307909	0.285	0.113	4.61697e-05
Slpi	2.79264e-09	-0.62103	0.609	0.594	4.73659e-05
Gys1	2.87061e-09	-0.392214	0.103	0.255	4.86885e-05
Nusap1	3.09977e-09	0.271276	0.356	0.169	5.25752e-05
Gdi1	3.15519e-09	-0.576595	0.443	0.491	5.35152e-05
Gm9733	3.17106e-09	0.29493	0.379	0.184	5.37843e-05
Ogt	3.20473e-09	-0.341753	0.49	0.448	5.43555e-05
Ostf1	3.32398e-09	-0.534824	0.905	0.845	5.6378e-05
Ebi3	3.60801e-09	-0.826462	0.34	0.439	6.11955e-05
Nlrp12	3.61656e-09	-0.400942	0.016	0.131	6.13405e-05
Ppa1	3.96448e-09	0.316628	0.198	0.067	6.72416e-05
Aldh2	4.13557e-09	-0.490776	0.802	0.738	7.01434e-05
Hspa1a	4.24333e-09	0.299407	0.285	0.119	7.19711e-05
Cdkn1b	4.3175e-09	-0.295924	0.767	0.685	7.32292e-05
Cdk1	4.44811e-09	0.265359	0.356	0.188	7.54443e-05
D4Wsu53e	4.96307e-09	-0.298333	0.854	0.696	8.41786e-05
Rabac1	5.42208e-09	-0.301977	0.407	0.285	9.19639e-05
Neat1	5.90754e-09	-0.363459	0.767	0.596	0.000100198
Hist1h2ap	6.11003e-09	0.463914	0.49	0.28	0.000103632
AB124611	7.88278e-09	-0.638922	0.506	0.507	0.0001337
Tecr	7.92104e-09	-0.439787	0.826	0.776	0.000134349
Pxn	8.02639e-09	-0.451185	0.565	0.631	0.000136136
Prc1	8.43445e-09	0.270127	0.423	0.324	0.000143057
Pstpip1	8.44095e-09	-0.376924	0.549	0.422	0.000143167
Uhrf1	8.54294e-09	0.325455	0.391	0.212	0.000144897
Ifrd1	8.61183e-09	-0.291916	0.332	0.209	0.000146065
Lasp1	9.00844e-09	-0.501594	0.609	0.559	0.000152792
Rab6a	9.36071e-09	-0.581755	0.506	0.532	0.000158767
Il1b	9.50953e-09	-1.65413	0.142	0.222	0.000161291
Aldh3b1	1.04899e-08	-0.335579	0.692	0.533	0.000177919
Sqstm1	1.08216e-08	-0.26636	0.775	0.596	0.000183546
Rab3il1	1.22453e-08	0.251568	0.107	0.017	0.000207693
Mafg	1.29123e-08	-0.557577	0.245	0.273	0.000219006
Iqgap1	1.37771e-08	-0.442647	0.96	0.912	0.000233673
Klf7	1.38965e-08	-0.498057	0.047	0.174	0.000235698
Camk1	1.39237e-08	-0.274458	0.542	0.359	0.000236161
Igsf6	1.39449e-08	-0.429797	0.838	0.743	0.000236519
Hcst	1.42511e-08	-0.687318	0.115	0.256	0.000241713
Optn	1.45505e-08	-0.305684	0.02	0.126	0.000246791
Nadk	1.53326e-08	-0.489799	0.85	0.726	0.000260056
Ncoa4	1.53953e-08	-0.550254	0.455	0.478	0.00026112
Carhsp1	1.61319e-08	-0.648978	0.273	0.378	0.000273613
Cdc42se1	1.73116e-08	-0.46004	0.787	0.672	0.000293622
Mtus1	2.08044e-08	-0.633657	0.549	0.613	0.000352864
Fam160a2	2.08494e-08	-0.272624	0.269	0.392	0.000353627
Ovgp1	2.39666e-08	-0.365121	0.028	0.13	0.000406498
Niacr1	2.49244e-08	-1.13759	0.051	0.136	0.000422743
Snap23	3.0107e-08	-0.505537	0.419	0.316	0.000510645
Hhex	3.62339e-08	-0.25673	0.36	0.246	0.000614564
Lyst	3.68477e-08	-0.273208	0.585	0.679	0.000624974
Hsd11b1	3.84324e-08	-0.751535	0.304	0.46	0.000651852
Lmnb1	3.89596e-08	0.26913	0.573	0.449	0.000660793
Wbp2	4.01439e-08	-0.318607	0.597	0.467	0.00068088
4632428N05Rik	4.14833e-08	-0.428092	0.83	0.75	0.000703599
Phyh	4.1912e-08	-0.440729	0.415	0.294	0.00071087
Amica1	4.33601e-08	-0.603863	0.281	0.182	0.000735431
Zfp637	4.69974e-08	0.269269	0.107	0.018	0.000797123
Adrb2	4.85238e-08	-0.915868	0.328	0.353	0.000823012
Cd244	4.9137e-08	-0.427335	0.233	0.179	0.000833413
Il18bp	5.10915e-08	-0.411557	0.036	0.15	0.000866562
Fbxl5	5.13807e-08	-0.60813	0.593	0.504	0.000871467
Hk3	5.33494e-08	-0.776502	0.589	0.662	0.000904859
Clec4e	5.63331e-08	-0.738989	0.296	0.321	0.000955467
Wipi1	5.98173e-08	-0.365908	0.067	0.212	0.00101456
Litaf	6.46614e-08	-0.48363	0.613	0.507	0.00109672
Hipk1	6.74268e-08	-0.292783	0.443	0.482	0.00114363
Cebpd	6.77167e-08	-0.717665	0.427	0.516	0.00114854
Mlst8	7.10332e-08	-0.39473	0.123	0.272	0.00120479
Rab5b	7.24693e-08	-0.393943	0.431	0.399	0.00122915
Ipcef1	7.55275e-08	-0.381453	0.146	0.265	0.00128102
Gsn	7.72725e-08	-0.669641	0.542	0.598	0.00131062
Spata13	8.06635e-08	-0.282213	0.194	0.336	0.00136813
Atg3	8.59525e-08	-0.52752	0.573	0.489	0.00145784
Stk10	9.28097e-08	-0.463293	0.708	0.611	0.00157414
Gsdmd	9.34706e-08	-0.318122	0.553	0.404	0.00158535
Tubb4b	9.35943e-08	0.384037	0.557	0.372	0.00158745
Vcam1	9.38516e-08	-0.447545	0.075	0.215	0.00159182
Hbp1	9.83984e-08	-0.363492	0.462	0.334	0.00166894
Cpne3	1.0342e-07	-0.289631	0.352	0.424	0.0017541
Hiat1	1.0787e-07	-0.305259	0.407	0.3	0.00182959
Nkg7	1.0853e-07	-1.04824	0.095	0.203	0.00184078
Nfam1	1.09387e-07	-0.621062	0.83	0.776	0.00185531
Thbs1	1.14127e-07	-0.64569	0.115	0.244	0.00193571
Hck	1.1415e-07	-0.32827	0.672	0.547	0.00193611
Smim14	1.19117e-07	-0.252452	0.462	0.406	0.00202034
Btg1	1.30743e-07	-0.51339	0.818	0.74	0.00221754
Prkd2	1.3755e-07	-0.254125	0.083	0.231	0.00233298
Fam129a	1.5995e-07	-0.49335	0.49	0.408	0.00271292
Lrrfip1	1.63327e-07	-0.401334	0.723	0.629	0.00277018
Amer2	1.67074e-07	-0.341757	0.02	0.108	0.00283373
Chi3l3	1.74483e-07	-1.51111	0.652	0.673	0.00295941
Nfkbiz	1.92095e-07	-0.583673	0.585	0.591	0.00325812
Ier2	1.96231e-07	-0.645553	0.854	0.822	0.00332827
Hist1h2ao	2.0124e-07	0.488016	0.601	0.405	0.00341323
Fam107b	2.07037e-07	-0.469759	0.723	0.666	0.00351156
Dennd1c	2.09099e-07	-0.46581	0.387	0.352	0.00354652
Chst12	2.09383e-07	-0.521104	0.49	0.483	0.00355134
Chst15	2.19994e-07	-0.285823	0.047	0.167	0.00373131
Gm13363	2.28844e-07	-0.487709	0.656	0.569	0.00388142
Ankrd33b	2.33247e-07	-0.400803	0.04	0.15	0.0039561
Evi2b	2.53008e-07	-0.446019	0.874	0.814	0.00429126
Arhgap25	2.79468e-07	-0.794942	0.257	0.337	0.00474005
Ntng2	2.86123e-07	-0.477503	0.13	0.275	0.00485292
4930470H14Rik	3.09795e-07	-0.575477	0.905	0.862	0.00525444
Rbm38	3.13469e-07	-0.370839	0.514	0.403	0.00531674
Asprv1	3.24162e-07	-1.24264	0.032	0.107	0.00549812
Cd101	3.74055e-07	-0.760179	0.063	0.135	0.00634435
Cdkn2aipnl	3.86366e-07	-0.361025	0.348	0.269	0.00655316
Ndel1	4.41706e-07	-0.571625	0.47	0.409	0.00749178
Rab27a	4.57641e-07	-0.489046	0.684	0.688	0.00776204
Adrbk1	4.70215e-07	-0.294605	0.656	0.54	0.00797531
Ckap4	4.72376e-07	-0.371893	0.198	0.318	0.00801197
Nt5e	4.98252e-07	-0.322406	0.028	0.133	0.00845086
Prr14	5.20922e-07	-0.278834	0.561	0.431	0.00883536
Txnip	5.30985e-07	-0.489817	0.391	0.293	0.00900604
Cd300e	5.31011e-07	-1.09733	0.051	0.108	0.00900647
Plp2	5.36764e-07	-0.517653	0.719	0.646	0.00910405
Arhgef1	5.60758e-07	-0.341228	0.759	0.642	0.00951101
Rasgrp4	5.94412e-07	-0.314855	0.336	0.406	0.0100818
Fas	6.67545e-07	-0.698724	0.198	0.175	0.0113222
Rin3	7.62849e-07	-0.388084	0.838	0.837	0.0129387
Cdkn2d	8.04343e-07	-0.362205	0.557	0.474	0.0136425
Hist2h3b	8.46272e-07	0.457938	0.375	0.211	0.0143536
Nfe2l2	9.10196e-07	-0.265913	0.538	0.418	0.0154378
Tmbim6	9.36445e-07	-0.342957	0.972	0.906	0.0158831
Nedd9	9.48065e-07	-0.528583	0.356	0.455	0.0160801
Fcgr3	9.75596e-07	-0.43433	0.802	0.687	0.0165471
Txnl4b	1.00998e-06	-0.499107	0.447	0.368	0.0171302
Arhgef39	1.04695e-06	0.304295	0.249	0.114	0.0177574
Hcls1	1.08757e-06	-0.283175	0.791	0.639	0.0184462
Osm	1.15733e-06	-1.07111	0.308	0.318	0.0196295
Acsl1	1.16507e-06	-0.386415	0.292	0.39	0.0197608
Lrch4	1.2124e-06	-0.255797	0.644	0.501	0.0205635
Plbd1	1.23403e-06	-0.424927	0.838	0.753	0.0209304
Arg2	1.3291e-06	-0.875408	0.047	0.125	0.0225428
Ncf2	1.55615e-06	-0.378999	0.775	0.657	0.0263939
Treml4	1.74836e-06	-0.653086	0.229	0.162	0.0296539
Taldo1	1.75078e-06	-0.486581	0.953	0.907	0.029695
Plek	1.77106e-06	-0.62683	0.435	0.428	0.030039
Zfyve27	1.84992e-06	-0.343538	0.403	0.496	0.0313766
Bcl2a1b	1.86734e-06	-0.613782	0.047	0.159	0.031672
Prickle3	1.94129e-06	-0.288915	0.561	0.571	0.0329261
Cds2	1.95812e-06	-0.2741	0.34	0.411	0.0332117
Cd81	2.07406e-06	-0.560769	0.304	0.428	0.0351782
C3	2.09891e-06	-0.250427	0.696	0.585	0.0355996
Snrk	2.17121e-06	-0.263694	0.332	0.247	0.0368258
Xpc	2.20374e-06	-0.300839	0.202	0.298	0.0373776
Twf2	2.72929e-06	-0.282492	0.652	0.522	0.0462915
Mir22hg	2.82263e-06	-0.312598	0.158	0.118	0.0478747
Hist2h3c2	3.15487e-06	0.318785	0.352	0.204	0.0535098
1810055G02Rik	3.22743e-06	-0.348297	0.047	0.157	0.0547404
Jup	3.30661e-06	-0.278116	0.095	0.228	0.0560834
Rfc4	3.42716e-06	0.259897	0.245	0.119	0.058128
Stx11	3.82017e-06	-0.659488	0.296	0.319	0.064794
[truncated: 176 more rows]

## Sheet: C3 FindMarkers
Supplementary Table 5H: FindMarkers output for C3
ID	p_val	avg_logFC	pct.1	pct.2	p_val_adj
Chit1	3.6877e-94	1.39753	0.738	0.042	6.25471e-90
Ms4a3	4.55357e-93	2.21826	0.762	0.096	7.72331e-89
Rrm2	8.78184e-88	1.4462	0.913	0.179	1.48949e-83
Nkg7	9.55504e-88	2.4179	0.698	0.08	1.62063e-83
Hmgn2	5.53574e-84	1.67207	1	0.89	9.38917e-80
Prss57	9.03397e-80	1.22904	0.715	0.07	1.53225e-75
Zfp36	4.55896e-79	-2.11442	0.773	0.976	7.73246e-75
Serpinb1a	8.1051e-74	1.48142	0.977	0.514	1.37471e-69
Lta4h	3.25599e-73	1.37214	0.983	0.522	5.52248e-69
Top2a	5.19802e-73	0.89468	0.919	0.228	8.81637e-69
Fcnb	2.12443e-71	1.54422	0.61	0.048	3.60325e-67
Rgcc	1.4385e-70	1.51323	0.779	0.136	2.43985e-66
Igfbp4	1.23208e-67	1.25714	0.767	0.147	2.08973e-63
Stmn1	1.41113e-67	1.07788	0.919	0.252	2.39341e-63
Hist2h3b	2.31008e-67	1.30511	0.808	0.145	3.91813e-63
Cebpe	2.09222e-66	0.891392	0.953	0.283	3.54861e-62
Cd63	2.73534e-64	1.19937	0.948	0.333	4.6394e-60
Tuba4a	9.21294e-64	1.10464	0.872	0.277	1.56261e-59
Hist1h4d	1.35037e-63	1.33695	0.884	0.247	2.29037e-59
Hist2h3c2	1.89961e-63	0.965097	0.779	0.137	3.22192e-59
Ftl1	4.1349e-63	-1.20281	1	1	7.0132e-59
Elane	4.30378e-63	3.8043	0.657	0.248	7.29964e-59
Ncam1	5.8857e-63	0.518851	0.953	0.358	9.98274e-59
Smc4	6.34609e-62	0.577746	0.913	0.27	1.07636e-57
Tubb5	2.23196e-61	1.12551	1	0.718	3.78563e-57
H2afx	2.24065e-61	1.11175	0.855	0.218	3.80037e-57
Lig1	3.57344e-59	0.598859	0.773	0.152	6.06092e-55
Asf1b	4.21625e-59	1.08823	0.785	0.165	7.15117e-55
Gpc1	2.12712e-58	0.277198	0.773	0.147	3.6078e-54
Cd81	3.03458e-58	0.83954	0.93	0.3	5.14695e-54
Ccl6	4.8256e-58	-2.84287	0.174	0.735	8.1847e-54
Spc25	2.6794e-57	0.994472	0.663	0.093	4.54453e-53
Hvcn1	4.83873e-57	0.768146	0.913	0.283	8.20696e-53
Tagln2	1.55403e-56	0.958201	0.948	0.375	2.6358e-52
Fth1	2.64201e-56	-1.67236	0.924	0.96	4.48112e-52
Slc43a3	5.86077e-56	0.757359	0.674	0.121	9.94046e-52
Tmem248	1.04795e-55	0.52348	0.669	0.098	1.77742e-51
Prtn3	4.99616e-54	2.56938	0.703	0.248	8.47398e-50
Dtymk	5.55861e-54	0.852063	0.785	0.18	9.42796e-50
Zfp367	1.22062e-53	0.417271	0.744	0.15	2.07029e-49
Lgals3	1.95264e-53	-1.54427	0.698	0.913	3.31187e-49
Tuba1b	2.71325e-53	1.03483	0.965	0.498	4.60195e-49
Kdelr2	3.49119e-53	0.738488	0.983	0.452	5.92142e-49
Agpat2	3.64551e-53	0.970225	0.785	0.183	6.18315e-49
1100001G20Rik	9.10805e-53	0.728423	0.988	0.423	1.54482e-48
Smc2	1.90354e-52	0.378365	0.738	0.161	3.22859e-48
Mogat2	5.58684e-52	0.877022	0.477	0.027	9.47584e-48
Uhrf1	8.41697e-51	0.706515	0.733	0.164	1.4276e-46
Anp32b	1.74799e-50	0.833849	0.901	0.312	2.96477e-46
Cdca8	2.69593e-50	0.789851	0.762	0.175	4.57257e-46
Cdk1	4.83597e-50	0.649489	0.698	0.139	8.20229e-46
Spint2	4.91802e-50	0.6625	0.576	0.066	8.34146e-46
H2afz	5.39297e-50	1.01626	0.994	0.73	9.14702e-46
Rrm1	7.04578e-50	0.598092	0.744	0.173	1.19504e-45
Ssrp1	6.22645e-49	0.664893	0.86	0.278	1.05607e-44
Ncapg2	8.34678e-49	0.310845	0.645	0.108	1.4157e-44
Cbx3	8.61599e-49	0.713599	0.988	0.498	1.46136e-44
Hist1h2ao	8.66036e-49	1.40942	0.89	0.368	1.46888e-44
Pira6	6.66363e-48	-0.933411	0.401	0.838	1.13022e-43
Mpo	7.38681e-48	3.03152	0.657	0.27	1.25288e-43
Neil3	1.33989e-47	0.569144	0.605	0.09	2.2726e-43
Gca	2.39108e-47	0.62208	0.744	0.177	4.05551e-43
Vcam1	2.8181e-47	0.827005	0.622	0.1	4.77977e-43
Mgst2	3.77269e-47	0.687987	0.773	0.197	6.39885e-43
Mki67	1.20707e-46	0.35333	0.82	0.247	2.04731e-42
Tmed3	2.0013e-46	1.06662	0.86	0.327	3.3944e-42
Dnmt1	2.60718e-46	0.458274	0.785	0.215	4.42204e-42
2019-09-01	3.10726e-46	0.272204	0.709	0.17	5.27022e-42
Gpr97	3.42418e-46	0.653142	0.756	0.189	5.80774e-42
Tfdp1	5.02279e-46	0.789058	0.837	0.274	8.51915e-42
Tyrobp	5.25577e-46	-1.15173	0.953	0.968	8.91432e-42
Pkmyt1	5.95701e-46	0.750109	0.64	0.12	1.01037e-41
Mrgpra2b	7.359e-46	-0.861636	0.878	0.542	1.24816e-41
Ncapd3	7.58995e-46	0.415718	0.669	0.143	1.28733e-41
Dek	1.20876e-45	0.467848	0.907	0.339	2.05018e-41
Ptma	1.6374e-45	0.770154	1	0.61	2.77719e-41
2810417H13Rik	4.12248e-45	0.584905	0.837	0.296	6.99213e-41
Hmgb1	5.14227e-45	0.788819	0.994	0.678	8.72181e-41
Prom1	5.81653e-45	0.477879	0.552	0.071	9.86541e-41
Lsp1	6.27611e-45	-1.55597	0.779	0.907	1.06449e-40
Chi3l3	1.17884e-44	1.51856	0.948	0.616	1.99942e-40
Psap	1.28399e-44	-1.99283	0.924	0.924	2.17778e-40
Alas1	1.52745e-44	0.938161	0.802	0.262	2.59071e-40
Ap3s1	1.73368e-44	0.87788	0.837	0.295	2.9405e-40
Lilra6	5.92742e-44	-1.01124	0.36	0.834	1.00535e-39
Dnajc9	6.94101e-44	0.780783	0.698	0.168	1.17726e-39
Kpna2	9.95431e-44	0.895402	0.837	0.303	1.68835e-39
Cyp4f18	1.38003e-43	-2.34845	0.11	0.624	2.34067e-39
Ak2	1.46385e-43	0.605169	0.971	0.478	2.48284e-39
Slbp	2.10665e-43	0.775946	0.802	0.249	3.57308e-39
Tmx4	2.26095e-43	0.421427	0.785	0.239	3.83479e-39
1810037I17Rik	2.84845e-43	0.615423	0.849	0.303	4.83126e-39
Ffar2	3.0536e-43	0.56981	0.593	0.098	5.1792e-39
Lbp	3.27326e-43	0.63086	0.616	0.114	5.55177e-39
Ran	4.14516e-43	0.550239	0.907	0.357	7.03061e-39
Gsr	4.85311e-43	0.610749	0.872	0.323	8.23136e-39
Pira11	5.37248e-43	-1.33348	0.384	0.751	9.11226e-39
Cdca7	8.65811e-43	0.615799	0.622	0.115	1.4685e-38
Tmem216	1.04074e-42	0.751114	0.645	0.128	1.76519e-38
Tacc3	1.06458e-42	0.737971	0.762	0.225	1.80563e-38
Clec4b2	1.35849e-42	0.633571	0.448	0.036	2.30413e-38
Desi1	1.68945e-42	0.365457	0.645	0.129	2.86548e-38
Acpl2	1.84713e-42	0.519138	0.616	0.112	3.13292e-38
Mbnl3	2.80139e-42	0.512717	0.895	0.399	4.75143e-38
Cdca2	3.8149e-42	0.412001	0.581	0.098	6.47046e-38
H2-D1	2.34018e-41	-1.4961	0.965	0.962	3.96918e-37
Hmgb2	2.63704e-41	0.699001	0.994	0.716	4.47268e-37
Mad2l1	6.47921e-41	0.657087	0.651	0.147	1.09894e-36
Birc5	2.17296e-40	0.749546	0.924	0.664	3.68556e-36
Tk1	2.30671e-40	0.801986	0.628	0.147	3.91242e-36
Mcm7	3.46705e-40	0.779732	0.703	0.188	5.88046e-36
Kit	5.37491e-40	0.294774	0.517	0.071	9.11638e-36
Ppia	6.00347e-40	0.76692	0.994	0.69	1.01825e-35
Ero1l	9.0662e-40	0.495784	0.744	0.217	1.53772e-35
Hist1h4b	1.15483e-39	0.388683	0.651	0.152	1.9587e-35
Mcm6	2.33105e-39	0.890615	0.733	0.224	3.95369e-35
Cks2	2.37974e-39	0.670229	0.733	0.216	4.03627e-35
Cdca3	3.06983e-39	0.495129	0.645	0.143	5.20674e-35
Mcu	3.40404e-39	0.31347	0.86	0.327	5.77359e-35
Pgls	4.18992e-39	0.778887	0.843	0.329	7.10652e-35
Stk16	5.02045e-39	0.564063	0.744	0.228	8.51518e-35
Mrpl18	5.50722e-39	0.530848	0.82	0.286	9.3408e-35
Nusap1	8.68386e-39	0.575565	0.622	0.136	1.47287e-34
Nudt3	1.25542e-38	0.461168	0.785	0.257	2.12932e-34
Gmnn	1.36718e-38	0.688048	0.593	0.115	2.31888e-34
Arhgap19	1.59751e-38	0.516018	0.715	0.218	2.70954e-34
Esco2	1.88936e-38	0.378839	0.459	0.059	3.20455e-34
Myadm	4.60739e-38	-1.49173	0.157	0.638	7.81459e-34
Sgol2	4.70345e-38	0.295018	0.872	0.563	7.97752e-34
Cks1b	1.727e-37	0.663366	0.674	0.173	2.92916e-33
Pbk	1.75602e-37	0.786875	0.512	0.084	2.97839e-33
Mmp8	3.17099e-37	-2.80001	0.209	0.641	5.37831e-33
S100a6	3.80542e-37	-1.56106	0.267	0.671	6.45437e-33
Cep128	4.11633e-37	0.260032	0.57	0.108	6.98171e-33
Incenp	4.12832e-37	0.573619	0.698	0.2	7.00204e-33
Pira2	5.34485e-37	-0.742597	0.267	0.733	9.0654e-33
Slc39a11	1.02168e-36	0.504156	0.657	0.164	1.73288e-32
Cst3	1.63854e-36	-1.96198	0.837	0.85	2.77913e-32
Tuba8	1.91397e-36	0.595889	0.465	0.059	3.24628e-32
Mrgpra2a	2.30789e-36	-0.599685	0.884	0.579	3.91442e-32
Lilrb3	2.34738e-36	-1.27247	0.5	0.842	3.98138e-32
H2afv	2.41721e-36	0.494264	0.826	0.311	4.09983e-32
Far2	2.52142e-36	0.297043	0.384	0.034	4.27658e-32
Pcna	2.82054e-36	0.910304	0.663	0.188	4.78391e-32
F630028O10Rik	2.98969e-36	0.578742	0.924	0.439	5.07082e-32
Myb	3.30692e-36	0.328715	0.576	0.118	5.60886e-32
Gatm	3.68206e-36	0.588246	0.837	0.329	6.24514e-32
1700020L24Rik	4.08418e-36	0.558268	0.465	0.06	6.92718e-32
Zmpste24	5.72046e-36	0.424497	0.773	0.262	9.70248e-32
Ptgr1	6.79035e-36	0.577568	0.552	0.113	1.15171e-31
Trem3	8.9134e-36	0.478563	0.953	0.488	1.5118e-31
Emb	1.16898e-35	-1.35973	0.122	0.574	1.98271e-31
Dusp1	1.21052e-35	-2.56447	0.459	0.777	2.05316e-31
Fos	1.24565e-35	-1.91711	0.186	0.628	2.11274e-31
Tmem180	1.34972e-35	0.487683	0.419	0.045	2.28926e-31
Tipin	1.39556e-35	0.779079	0.599	0.134	2.367e-31
Cldn15	2.39461e-35	0.516651	0.43	0.048	4.0615e-31
Orm1	2.62463e-35	0.753308	0.471	0.065	4.45164e-31
Mcm4	2.66557e-35	0.57921	0.68	0.193	4.52107e-31
Golt1b	3.3512e-35	0.454213	0.721	0.222	5.68398e-31
Plscr1	6.07725e-35	0.432614	0.698	0.203	1.03076e-30
Camp	1.07465e-34	1.20539	0.913	0.539	1.82271e-30
Etfb	2.00273e-34	0.895556	0.797	0.309	3.39683e-30
Smc1a	2.15795e-34	0.344319	0.75	0.25	3.6601e-30
1190002F15Rik	2.26386e-34	0.388742	0.43	0.052	3.83973e-30
Ndufv3	2.8267e-34	0.710289	0.75	0.255	4.79436e-30
Ckap2l	2.97381e-34	0.463144	0.599	0.139	5.04388e-30
Ccna2	3.18287e-34	0.603509	0.674	0.191	5.39847e-30
Ly75	3.2676e-34	0.330759	0.663	0.185	5.54218e-30
E2f8	3.35734e-34	0.462268	0.605	0.16	5.69438e-30
Dut	3.84604e-34	0.405989	0.57	0.123	6.52327e-30
Impdh1	5.95486e-34	0.405064	0.506	0.09	1.01e-29
Hmga1-rs1	6.80068e-34	0.719625	0.663	0.209	1.15346e-29
Slco4c1	7.29471e-34	0.32491	0.663	0.191	1.23726e-29
Rara	7.41435e-34	-0.931854	0.064	0.513	1.25755e-29
Ctsg	7.84727e-34	2.50826	0.471	0.158	1.33097e-29
Ube2c	9.29124e-34	1.02264	0.669	0.336	1.57589e-29
Nedd4	1.23401e-33	0.324238	0.57	0.123	2.093e-29
Ppil1	1.49832e-33	0.742624	0.587	0.136	2.54129e-29
Sumo2	1.51288e-33	0.55162	0.93	0.475	2.56599e-29
Banf1	1.6422e-33	0.527061	0.773	0.279	2.78533e-29
Sat1	1.64475e-33	-1.37422	0.948	0.936	2.78966e-29
Tubb4b	1.67403e-33	0.777246	0.814	0.34	2.83931e-29
Tnfrsf26	2.08553e-33	0.534799	0.634	0.173	3.53726e-29
Mt1	2.47122e-33	1.20808	0.61	0.191	4.19144e-29
Gys1	2.85751e-33	0.39973	0.605	0.148	4.84663e-29
Lamtor2	3.62098e-33	0.673777	0.831	0.339	6.14154e-29
Dstn	3.64438e-33	0.558864	0.994	0.686	6.18123e-29
Cdca4	3.89477e-33	0.385954	0.645	0.176	6.60592e-29
Csf1r	4.58972e-33	-1.77296	0.122	0.542	7.78462e-29
1810055G02Rik	5.78072e-33	0.370551	0.448	0.073	9.80469e-29
Rab44	7.81136e-33	0.419766	0.814	0.323	1.32488e-28
Fbxo5	8.31372e-33	0.604097	0.494	0.097	1.41009e-28
Plk1	8.46446e-33	0.652735	0.599	0.149	1.43566e-28
Tpm4	1.08451e-32	-1.58748	0.192	0.595	1.83944e-28
Actn4	1.35026e-32	0.441724	0.785	0.296	2.29018e-28
Rbbp7	1.53038e-32	0.547005	0.715	0.235	2.59567e-28
Anp32e	1.83873e-32	0.349992	0.715	0.233	3.11868e-28
C3	2.24046e-32	0.651212	0.948	0.548	3.80004e-28
Tspan32	2.81465e-32	0.54444	0.709	0.229	4.77393e-28
Cdk2	3.14975e-32	0.446797	0.762	0.276	5.3423e-28
Kif11	3.8535e-32	0.397461	0.64	0.207	6.53591e-28
Cdc45	3.91149e-32	0.590404	0.547	0.118	6.63428e-28
Atpif1	4.18055e-32	0.779122	0.791	0.312	7.09063e-28
Atp2a3	4.69574e-32	0.553701	0.86	0.416	7.96444e-28
Ptgs1	4.74514e-32	0.379363	0.593	0.148	8.04823e-28
Ltb4r1	5.2751e-32	0.305568	0.924	0.466	8.94711e-28
Plk4	5.34823e-32	0.346758	0.494	0.093	9.07114e-28
Sirpb1b	5.80097e-32	-1.36885	0.017	0.42	9.83903e-28
Cybasc3	8.81083e-32	0.516026	0.779	0.296	1.4944e-27
Snrpd1	9.00599e-32	0.771933	0.651	0.187	1.52751e-27
Ndc80	1.20188e-31	0.353028	0.494	0.09	2.03852e-27
Atp5j	1.68564e-31	0.511589	0.791	0.31	2.85901e-27
Rfc4	1.73919e-31	0.644041	0.483	0.086	2.94985e-27
Mms22l	2.01793e-31	0.266948	0.523	0.109	3.42261e-27
Hnrnpa2b1	2.20125e-31	0.522141	0.994	0.703	3.73354e-27
Ilf2	2.29184e-31	0.467168	0.651	0.192	3.8872e-27
Prim1	2.57704e-31	0.512802	0.471	0.083	4.37093e-27
1700037H04Rik	2.75587e-31	0.423031	0.692	0.222	4.67423e-27
Hells	2.76851e-31	0.391993	0.506	0.104	4.69567e-27
Srsf6	3.44369e-31	0.373864	0.773	0.293	5.84084e-27
Pgp	3.81227e-31	0.605707	0.605	0.158	6.466e-27
Slco4a1	4.35626e-31	0.336472	0.366	0.036	7.38866e-27
Prr13	4.47759e-31	-1.5237	0.814	0.867	7.59444e-27
Slc28a2	5.34632e-31	0.262462	0.564	0.134	9.06789e-27
Ica1	6.00695e-31	0.425676	0.465	0.079	1.01884e-26
Fah	7.7367e-31	0.517805	0.39	0.046	1.31222e-26
Ndufb3	7.89957e-31	0.705008	0.698	0.229	1.33985e-26
Stub1	8.82415e-31	0.48552	0.738	0.264	1.49666e-26
Ddx39b	9.54567e-31	0.47429	0.802	0.326	1.61904e-26
Lin28a	1.05847e-30	0.286762	0.727	0.254	1.79527e-26
Ctss	1.07927e-30	-2.26155	0.11	0.492	1.83055e-26
Fcer1g	1.10689e-30	-0.836324	0.913	0.953	1.87739e-26
Aurkb	1.33994e-30	0.593117	0.581	0.149	2.27268e-26
Ppp2r4	1.37242e-30	0.297376	0.797	0.327	2.32775e-26
Gm2a	1.43234e-30	-1.47828	0.529	0.701	2.4294e-26
Serbp1	1.49964e-30	0.258054	0.872	0.408	2.54353e-26
Pole4	2.53904e-30	0.344124	0.529	0.115	4.30647e-26
Hsd11b1	3.58241e-30	0.410718	0.82	0.35	6.07612e-26
Bub3	4.10094e-30	0.314653	0.75	0.283	6.95561e-26
Cenpk	5.46982e-30	0.353099	0.419	0.064	9.27737e-26
Rnaseh2c	5.78838e-30	0.58291	0.703	0.242	9.81767e-26
Hexb	5.94433e-30	0.44029	0.744	0.276	1.00822e-25
Rfc5	7.27341e-30	0.544484	0.541	0.124	1.23364e-25
Mpc1	7.34147e-30	0.670662	0.698	0.245	1.24519e-25
Psmc3	7.54281e-30	0.421638	0.767	0.298	1.27934e-25
Anapc5	1.46502e-29	0.546793	0.808	0.347	2.48482e-25
Abhd5	1.84316e-29	0.434673	0.593	0.161	3.12618e-25
Mcm5	2.47132e-29	0.643806	0.703	0.309	4.1916e-25
Atrn	2.66444e-29	0.253135	0.674	0.221	4.51916e-25
Casp7	2.84807e-29	0.422999	0.488	0.098	4.83061e-25
Parvg	3.42649e-29	0.363516	0.837	0.377	5.81167e-25
Aprt	4.06456e-29	0.435318	0.849	0.391	6.8939e-25
Rpsa	4.14625e-29	0.506396	0.878	0.428	7.03245e-25
Ilf3	4.80108e-29	0.319571	0.674	0.222	8.14311e-25
Tyms	5.35221e-29	0.347774	0.93	0.81	9.07788e-25
Sgms2	7.18449e-29	0.354267	0.907	0.495	1.21856e-24
Atp5o	7.4454e-29	0.321703	0.762	0.323	1.26281e-24
Pld4	8.56884e-29	-1.98693	0.128	0.458	1.45336e-24
Rps28	8.92616e-29	0.433528	0.948	0.535	1.51397e-24
Ndufa13	9.58024e-29	0.254143	0.855	0.422	1.62491e-24
Cox7c	9.65488e-29	0.338887	0.779	0.328	1.63756e-24
Syngr1	1.01982e-28	0.423165	0.285	0.016	1.72972e-24
Selplg	1.16517e-28	-1.53139	0.68	0.807	1.97624e-24
Tbrg1	1.24082e-28	0.344023	0.517	0.118	2.10455e-24
Bckdk	1.28512e-28	0.539458	0.855	0.512	2.17968e-24
Naa38	1.67387e-28	0.470507	0.64	0.201	2.83904e-24
Uqcrb	1.69643e-28	0.579967	0.692	0.24	2.87731e-24
Samhd1	1.81444e-28	-1.22189	0.238	0.63	3.07747e-24
Cdc20	2.25651e-28	0.605667	0.599	0.17	3.82726e-24
Rab28	2.51826e-28	0.264593	0.605	0.179	4.27121e-24
Set	2.55014e-28	0.366097	0.855	0.404	4.32529e-24
Ndufa12	3.75018e-28	0.599618	0.738	0.284	6.36068e-24
Srsf3	4.91424e-28	0.510312	0.89	0.473	8.33504e-24
Ska2	4.93766e-28	0.477696	0.436	0.077	8.37476e-24
Cdca7l	5.48975e-28	0.382774	0.459	0.087	9.31117e-24
Isca2	5.81339e-28	0.403598	0.57	0.158	9.86009e-24
Ccne2	7.25084e-28	0.318291	0.424	0.072	1.22981e-23
Sun2	8.84358e-28	0.322065	0.994	0.661	1.49996e-23
Btg1	8.94729e-28	-1.18048	0.535	0.8	1.51755e-23
Romo1	9.17112e-28	0.436409	0.64	0.207	1.55551e-23
Pmf1	9.92423e-28	0.41182	0.581	0.164	1.68325e-23
Enpp5	1.05653e-27	0.257854	0.384	0.06	1.79198e-23
Rfwd3	1.16611e-27	0.263688	0.57	0.154	1.97783e-23
Cox5b	1.32121e-27	0.421838	0.814	0.371	2.24091e-23
Arsb	1.50113e-27	0.275562	0.541	0.136	2.54606e-23
Ndufa2	1.68535e-27	0.33652	0.744	0.313	2.85852e-23
Mcm3	1.80918e-27	0.637296	0.581	0.173	3.06855e-23
Ssbp4	1.87266e-27	0.303337	0.5	0.116	3.17622e-23
Rps29	1.94433e-27	0.543182	0.965	0.585	3.29778e-23
Elovl5	2.18151e-27	0.313063	0.744	0.295	3.70005e-23
Emilin2	2.38892e-27	-1.13542	0.087	0.462	4.05185e-23
Tpi1	2.46691e-27	0.375972	0.733	0.288	4.18412e-23
Tmem256	2.70828e-27	0.593557	0.686	0.246	4.59351e-23
Ppp1cb	2.7475e-27	0.258506	0.797	0.348	4.66003e-23
Atp5g2	2.98662e-27	0.288979	0.86	0.429	5.06561e-23
Fkbp2	3.10602e-27	0.364812	0.657	0.229	5.26812e-23
Apitd1	3.33057e-27	0.403956	0.337	0.038	5.64898e-23
Tra2b	4.33761e-27	0.26866	0.924	0.511	7.35702e-23
Ptprc	4.40172e-27	-1.06993	0.895	0.95	7.46576e-23
Atp5h	5.4476e-27	0.420623	0.837	0.399	9.23968e-23
Tpd52	5.66931e-27	-1.27261	0.087	0.476	9.61572e-23
Retnlg	5.83555e-27	-3.63139	0.465	0.682	9.89767e-23
Dpy30	7.54e-27	0.454126	0.517	0.125	1.27886e-22
Ngp	1.1469e-26	0.836907	0.953	0.72	1.94525e-22
Fdps	1.19334e-26	0.838714	0.634	0.216	2.02403e-22
Stra13	1.2394e-26	0.282611	0.593	0.199	2.10215e-22
Ssna1	1.25654e-26	0.320508	0.733	0.298	2.13122e-22
Pla2g7	1.32637e-26	-2.03169	0.116	0.48	2.24966e-22
Cox7a2	1.43368e-26	0.400444	0.75	0.308	2.43166e-22
Nudc	1.45504e-26	0.504066	0.698	0.259	2.4679e-22
D430020J02Rik	1.64568e-26	0.288115	0.39	0.078	2.79123e-22
Tgfbi	1.84698e-26	-1.53177	0.116	0.484	3.13267e-22
Scp2	2.39276e-26	0.307879	0.971	0.615	4.05835e-22
Fyb	2.4197e-26	-1.05708	0.221	0.593	4.10406e-22
2700029M09Rik	2.42774e-26	0.491049	0.599	0.183	4.11768e-22
Smtn	2.86718e-26	0.307386	0.384	0.058	4.86302e-22
Rpl37a	3.40115e-26	0.404296	0.942	0.549	5.76869e-22
Junb	3.64258e-26	-2.07211	0.355	0.658	6.17818e-22
Nme6	4.0878e-26	0.405377	0.314	0.032	6.93331e-22
Kif22	4.76461e-26	0.521023	0.547	0.148	8.08126e-22
Ccnb2	5.57086e-26	0.525561	0.663	0.234	9.44873e-22
Mgl2	5.77622e-26	0.457966	0.384	0.087	9.79705e-22
Atp6v0c	8.87345e-26	-0.283883	0.773	0.488	1.50503e-21
Tm7sf3	1.00262e-25	0.308243	0.483	0.112	1.70055e-21
Rpl28	1.1458e-25	0.485599	0.936	0.543	1.94338e-21
Rpa3	1.16939e-25	0.509274	0.448	0.093	1.9834e-21
Wdhd1	1.2076e-25	0.277412	0.378	0.06	2.04821e-21
U2af1	1.32595e-25	0.46292	0.721	0.287	2.24895e-21
Rplp2	1.37391e-25	0.394434	0.791	0.37	2.33028e-21
Ranbp1	1.77616e-25	0.461237	0.674	0.249	3.01254e-21
Pecr	2.13233e-25	0.351046	0.238	0.011	3.61664e-21
Prc1	2.19391e-25	0.446796	0.674	0.286	3.72109e-21
Atp6v0c-ps2	2.20764e-25	0.561462	0.948	0.636	3.74437e-21
Mmp9	2.69462e-25	-1.7567	0.355	0.623	4.57035e-21
Uchl5	2.88788e-25	0.331566	0.663	0.239	4.89814e-21
P4hb	3.44629e-25	0.464594	0.93	0.549	5.84524e-21
Rbm3	3.49388e-25	0.345863	0.913	0.513	5.92597e-21
G3bp1	3.56575e-25	0.3136	0.75	0.318	6.04786e-21
Chaf1a	3.80913e-25	0.355209	0.424	0.086	6.46066e-21
Ccnf	3.88043e-25	0.456144	0.477	0.114	6.58159e-21
Cdc7	4.32693e-25	0.36646	0.331	0.047	7.33891e-21
Cox6c	4.99546e-25	0.331437	0.733	0.311	8.4728e-21
Ifi27l2a	5.29006e-25	-1.73613	0.134	0.507	8.97247e-21
Mcm2	5.32537e-25	0.574054	0.494	0.141	9.03237e-21
Anxa3	5.3822e-25	0.457995	0.913	0.527	9.12875e-21
S100a9	6.95549e-25	0.49574	1	0.796	1.17972e-20
Ptpn7	7.80758e-25	0.369509	0.785	0.413	1.32424e-20
Tcf19	8.04298e-25	0.798754	0.483	0.132	1.36417e-20
Gstm1	9.60224e-25	1.1895	0.581	0.235	1.62864e-20
Haus5	9.85672e-25	0.503262	0.442	0.096	1.6718e-20
Tpx2	1.12431e-24	0.393651	0.744	0.421	1.90694e-20
Nasp	1.34849e-24	0.293808	0.488	0.12	2.28718e-20
S100a1	1.37642e-24	0.76591	0.512	0.138	2.33454e-20
Tuba1c	1.38526e-24	0.53478	0.767	0.342	2.34954e-20
Flot2	1.38553e-24	0.322041	0.843	0.424	2.35e-20
Atp6ap2	1.46321e-24	0.47902	0.791	0.38	2.48174e-20
Coro7	1.47677e-24	0.331472	0.93	0.546	2.50474e-20
Erh	1.59851e-24	0.464233	0.686	0.267	2.71123e-20
Ncaph	1.63732e-24	0.502137	0.488	0.133	2.77706e-20
Fam132a	1.69699e-24	0.396192	0.477	0.117	2.87826e-20
Eif5a	2.02229e-24	0.477711	0.983	0.688	3.43e-20
Fignl1	2.5191e-24	0.45949	0.401	0.08	4.27264e-20
Ulbp1	2.94693e-24	0.350672	0.407	0.082	4.99828e-20
Rhno1	3.22295e-24	0.372183	0.552	0.163	5.46644e-20
Cst7	3.22492e-24	0.94909	0.372	0.089	5.46979e-20
Ift27	3.32926e-24	0.377563	0.424	0.087	5.64676e-20
Knstrn	3.47223e-24	0.353803	0.535	0.152	5.88925e-20
Ap2s1	3.55301e-24	0.441366	0.744	0.322	6.02627e-20
Rps16	4.03991e-24	0.332624	0.872	0.472	6.85209e-20
Irf5	4.05533e-24	-1.3507	0.11	0.411	6.87824e-20
Shisa5	4.20953e-24	-1.37765	0.419	0.565	7.13979e-20
Tkt	4.30055e-24	0.476047	1	0.83	7.29417e-20
Siva1	5.54201e-24	0.654874	0.616	0.213	9.39981e-20
Galns	6.10211e-24	0.343077	0.558	0.168	1.03498e-19
Gtse1	7.56876e-24	0.270807	0.436	0.093	1.28374e-19
Pgam1	9.19386e-24	0.356744	0.895	0.502	1.55937e-19
Rnaseh2b	9.80925e-24	0.349374	0.483	0.121	1.66375e-19
Commd1	1.00684e-23	0.330768	0.663	0.26	1.7077e-19
Nuf2	1.02551e-23	0.440092	0.529	0.26	1.73937e-19
Fbp1	1.1742e-23	0.406196	0.326	0.042	1.99156e-19
Ndufa4	1.21364e-23	0.409568	0.709	0.298	2.05845e-19
Srsf2	1.32623e-23	0.274349	0.785	0.37	2.24942e-19
Ap1s1	1.73315e-23	0.390259	0.547	0.164	2.93959e-19
Ifitm3	2.27502e-23	-1.09816	0.547	0.738	3.85866e-19
Fcho1	2.64913e-23	0.276441	0.477	0.12	4.4932e-19
Hmgb3	2.83954e-23	0.493066	0.517	0.159	4.81615e-19
Mcee	3.17941e-23	0.381964	0.529	0.153	5.39261e-19
6430706D22Rik	3.35975e-23	0.26824	0.453	0.107	5.69847e-19
Emc2	3.42583e-23	0.323234	0.634	0.234	5.81054e-19
Pnp	4.61798e-23	0.381909	0.552	0.171	7.83255e-19
Atad2	4.75578e-23	0.294536	0.605	0.326	8.06628e-19
Rpl35a	4.7726e-23	0.308697	0.924	0.553	8.0948e-19
Exosc8	5.16426e-23	0.429414	0.523	0.153	8.75911e-19
Cdt1	5.27288e-23	0.453658	0.465	0.116	8.94333e-19
Sarnp	5.66434e-23	0.318535	0.715	0.303	9.60729e-19
Hn1l	8.29304e-23	0.330298	0.529	0.157	1.40658e-18
2610018G03Rik	8.72163e-23	0.278784	0.477	0.124	1.47928e-18
Rpl6	1.06241e-22	0.270007	0.977	0.653	1.80195e-18
Slfn1	1.10069e-22	-1.60926	0.163	0.5	1.86688e-18
Slc40a1	1.12832e-22	-0.310845	0.558	0.221	1.91374e-18
Pira1	1.12972e-22	-0.88178	0.233	0.602	1.91612e-18
Racgap1	1.25131e-22	0.319987	0.558	0.178	2.12235e-18
Nucb1	1.34861e-22	0.310324	0.709	0.303	2.28737e-18
Fen1	1.35673e-22	0.550203	0.517	0.152	2.30115e-18
Rnaset2a	1.54122e-22	0.495507	0.89	0.517	2.61406e-18
Itgb7	1.66264e-22	-1.37566	0.076	0.361	2.82001e-18
B2m	1.70115e-22	-0.905047	0.983	0.934	2.88532e-18
Rpl29	1.96375e-22	0.263873	0.907	0.534	3.33072e-18
Rpl15	2.9487e-22	0.291414	0.878	0.493	5.00128e-18
Psmb2	3.23713e-22	0.326231	0.721	0.324	5.4905e-18
Mxd1	3.33722e-22	-1.13652	0.802	0.676	5.66026e-18
Ncaph2	3.38888e-22	0.366707	0.622	0.232	5.74788e-18
Ucp2	3.40181e-22	-0.710695	0.977	0.88	5.76981e-18
Cox5a	3.72906e-22	0.471514	0.802	0.401	6.32486e-18
Ndufb10	4.31825e-22	0.413902	0.651	0.259	7.32419e-18
Ndufb7	4.46888e-22	0.416033	0.814	0.414	7.57967e-18
Pold1	4.4828e-22	0.351617	0.448	0.11	7.60328e-18
BC002163	4.87083e-22	0.462333	0.634	0.24	8.26141e-18
Hist1h2ab	4.90923e-22	0.425869	0.378	0.075	8.32654e-18
Tubg1	5.00737e-22	0.597868	0.43	0.105	8.493e-18
Slc37a1	5.06796e-22	0.254706	0.698	0.296	8.59577e-18
Cd300lb	5.24534e-22	-1.34636	0.116	0.479	8.89661e-18
Tecr	5.73332e-22	0.354175	0.994	0.749	9.72429e-18
Trpm2	5.89155e-22	-0.657191	0.07	0.398	9.99266e-18
Hmga1	6.22515e-22	0.359593	0.494	0.14	1.05585e-17
Adam8	6.23719e-22	-1.3856	0.163	0.509	1.05789e-17
Aurka	7.00553e-22	0.58713	0.5	0.148	1.18821e-17
Ms4a6c	7.39465e-22	-1.46423	0.372	0.582	1.25421e-17
Rps20	8.08936e-22	0.416249	0.75	0.351	1.37204e-17
Tmsb10	8.62797e-22	-0.735932	0.669	0.593	1.46339e-17
Cdca5	9.29498e-22	0.388568	0.366	0.067	1.57652e-17
Il6ra	1.00279e-21	-0.971867	0.192	0.505	1.70083e-17
Haus1	1.0467e-21	0.399465	0.384	0.078	1.7753e-17
Sumo3	1.10151e-21	0.360003	0.576	0.197	1.86826e-17
Pira7	1.1057e-21	-0.827627	0.157	0.53	1.87538e-17
Taf9	1.2602e-21	0.345596	0.622	0.235	2.13743e-17
2010107E04Rik	1.28421e-21	0.447105	0.645	0.258	2.17815e-17
Cdk6	1.40093e-21	0.349426	0.488	0.151	2.37612e-17
Srsf4	1.42133e-21	0.258814	0.547	0.183	2.41073e-17
Chaf1b	1.48099e-21	0.496084	0.384	0.078	2.51191e-17
Clec12a	1.49848e-21	0.419209	0.802	0.412	2.54157e-17
LOC100038947	1.58639e-21	-1.37176	0.105	0.422	2.69068e-17
Rqcd1	1.6022e-21	0.377006	0.576	0.201	2.71749e-17
Rnps1	1.60407e-21	0.462223	0.581	0.202	2.72066e-17
Mfsd10	1.6047e-21	0.530391	0.587	0.209	2.72173e-17
Ccnb1	1.63382e-21	0.547447	0.535	0.171	2.77113e-17
Dap	1.76265e-21	0.289934	0.75	0.351	2.98963e-17
Naca	1.81995e-21	0.383302	0.901	0.533	3.08681e-17
Sae1	1.98789e-21	0.384345	0.599	0.216	3.37166e-17
Hist1h2ap	2.56348e-21	0.876083	0.628	0.273	4.34792e-17
Slc2a6	2.79378e-21	-1.09603	0.006	0.285	4.73852e-17
Rad51	3.23396e-21	0.364478	0.337	0.062	5.48511e-17
Dtwd1	3.5173e-21	0.275609	0.291	0.037	5.96569e-17
Tma16	3.58198e-21	0.357148	0.297	0.042	6.07539e-17
Rpl18	3.70425e-21	0.279088	0.802	0.421	6.28279e-17
Ptplad2	4.05683e-21	-0.972499	0.087	0.425	6.8808e-17
Sfxn1	4.21672e-21	0.301372	0.436	0.11	7.15198e-17
Rpl27	4.33722e-21	0.468478	0.82	0.432	7.35635e-17
Rpl24	5.3369e-21	0.278113	0.878	0.51	9.05192e-17
Cenph	5.96131e-21	0.336383	0.314	0.052	1.0111e-16
Rfc2	5.99785e-21	0.304077	0.692	0.301	1.0173e-16
Rab6a	6.00932e-21	-0.31445	0.779	0.478	1.01924e-16
Kif23	6.23247e-21	0.296618	0.564	0.193	1.05709e-16
Rps8	6.80328e-21	0.327297	0.965	0.649	1.1539e-16
Arhgef39	6.87761e-21	0.398004	0.413	0.096	1.16651e-16
Naa40	7.08953e-21	0.331939	0.453	0.12	1.20245e-16
Poc1a	8.25977e-21	0.33897	0.343	0.061	1.40094e-16
Lcp1	8.50597e-21	-0.962346	1	0.984	1.4427e-16
Rab7	8.70138e-21	-0.348279	0.715	0.475	1.47584e-16
Sptssa	9.28341e-21	0.36056	0.622	0.241	1.57456e-16
Slpi	1.06165e-20	-0.649474	0.779	0.563	1.80066e-16
Snrpg	1.54005e-20	0.43338	0.576	0.214	2.61208e-16
Kifc1	1.6226e-20	0.379748	0.407	0.096	2.7521e-16
Nsmce1	1.62411e-20	0.389967	0.523	0.167	2.75466e-16
B3gnt2	1.64288e-20	0.321996	0.703	0.314	2.78648e-16
Dynlt1b	1.67731e-20	-0.435704	0.605	0.372	2.84488e-16
Gtf2f1	1.78609e-20	0.317454	0.517	0.165	3.02938e-16
Rps18	1.80715e-20	0.40697	0.872	0.502	3.0651e-16
Atp5k	1.81299e-20	0.292099	0.622	0.257	3.07501e-16
Notch2	2.10065e-20	-0.437269	0.814	0.907	3.5629e-16
Gdi2	2.28368e-20	-0.309591	0.878	0.599	3.87334e-16
Lsm5	2.34168e-20	0.286426	0.43	0.109	3.97172e-16
Lsm2	2.63729e-20	0.369334	0.512	0.161	4.47311e-16
Rpl31	2.72593e-20	0.301543	0.68	0.298	4.62345e-16
Iqgap1	2.78997e-20	-0.799326	0.913	0.925	4.73206e-16
Cenpa	2.91399e-20	0.440496	0.587	0.216	4.94242e-16
Calm2	3.67613e-20	0.301798	0.89	0.532	6.23509e-16
Snrpe	3.89592e-20	0.535779	0.593	0.224	6.60787e-16
Bub1b	3.97829e-20	0.298129	0.424	0.107	6.74758e-16
Ear2	4.12319e-20	-2.50419	0.32	0.572	6.99334e-16
Polr2g	4.25623e-20	0.423381	0.564	0.2	7.21899e-16
Enkd1	4.62983e-20	0.267784	0.238	0.022	7.85265e-16
Sh3glb1	4.65099e-20	-0.645843	0.14	0.483	7.88855e-16
Cdkn3	4.96311e-20	0.480853	0.448	0.123	8.41794e-16
S100a10	5.11065e-20	-1.43554	0.035	0.323	8.66817e-16
S100a8	5.29413e-20	0.466294	0.994	0.828	8.97937e-16
Srsf10	5.39168e-20	0.279859	0.645	0.266	9.14483e-16
Cd68	5.66398e-20	-1.52001	0.186	0.418	9.60667e-16
Orc6	5.72237e-20	0.376157	0.384	0.088	9.70571e-16
Ly86	6.609e-20	-1.09137	0.023	0.296	1.12095e-15
Rps17	7.90787e-20	0.574654	0.855	0.496	1.34125e-15
Cox17	8.08767e-20	0.287263	0.564	0.205	1.37175e-15
Swi5	8.50195e-20	0.383416	0.674	0.299	1.44202e-15
Laptm5	8.88032e-20	-0.858998	0.977	0.932	1.50619e-15
Anxa2	8.96698e-20	-1.27615	0.669	0.771	1.52089e-15
Gtf2e2	1.02877e-19	0.329241	0.523	0.173	1.7449e-15
Rad18	1.07421e-19	0.301573	0.355	0.074	1.82197e-15
Ly6c1	1.10204e-19	-0.987715	0.779	0.676	1.86917e-15
Clec4a3	1.1236e-19	-1.63076	0.041	0.326	1.90574e-15
Ifitm2	1.17274e-19	-0.91694	0.855	0.791	1.98909e-15
Rpl32	1.22253e-19	0.322451	0.82	0.455	2.07353e-15
Rasl11b	1.26322e-19	0.339609	0.302	0.049	2.14256e-15
Ltf	1.27855e-19	0.358367	0.913	0.617	2.16855e-15
Mlf1ip	1.32898e-19	0.250132	0.302	0.049	2.25408e-15
Prelid1	1.35845e-19	0.313275	0.692	0.316	2.30406e-15
Rdh12	1.6544e-19	0.381667	0.343	0.066	2.80603e-15
Gpr137b-ps	1.65697e-19	-0.910003	0.064	0.368	2.81039e-15
Nap1l4	1.73864e-19	0.306244	0.651	0.28	2.94892e-15
Shcbp1	2.00475e-19	0.426495	0.395	0.099	3.40025e-15
Cdc6	2.42559e-19	0.255875	0.326	0.06	4.11404e-15
Rnf26	2.48011e-19	0.284776	0.331	0.062	4.20651e-15
Tssc4	2.63556e-19	0.462101	0.395	0.095	4.47017e-15
Gtf2f2	2.63583e-19	0.336523	0.407	0.102	4.47064e-15
Mtus1	2.65802e-19	-0.486659	0.814	0.558	4.50827e-15
Ms4a4c	2.77975e-19	-0.973045	0.064	0.328	4.71474e-15
Rpl38	3.0632e-19	0.374125	0.779	0.412	5.1955e-15
Ctsb	3.08269e-19	-0.657826	0.924	0.715	5.22854e-15
Zfp692	3.58825e-19	0.258955	0.413	0.108	6.08603e-15
Ndufa1	4.08761e-19	0.261149	0.552	0.216	6.93299e-15
Alox5ap	4.22218e-19	-0.845194	0.953	0.925	7.16123e-15
Spcs1	4.40508e-19	0.33847	0.61	0.246	7.47146e-15
Sh3bgrl3	4.43757e-19	0.326651	0.994	0.764	7.52657e-15
Malat1	4.57984e-19	-0.722857	1	0.998	7.76787e-15
Coa3	5.20724e-19	0.261925	0.558	0.212	8.83201e-15
Atp1a3	5.27118e-19	-1.22162	0.587	0.717	8.94045e-15
Rps24	5.6536e-19	0.264319	0.89	0.548	9.58908e-15
Uba52	5.8011e-19	0.255859	0.953	0.648	9.83925e-15
Slfn4	6.09059e-19	-1.28094	0.715	0.602	1.03302e-14
Sirpb1a	6.60945e-19	-0.819626	0.017	0.285	1.12103e-14
Ndufc1	6.60946e-19	0.322866	0.494	0.182	1.12103e-14
Prdx6	6.81846e-19	0.336509	0.872	0.53	1.15648e-14
Hist1h1b	7.06381e-19	0.605919	0.424	0.114	1.19809e-14
Nt5c3	7.06617e-19	0.356885	0.494	0.159	1.19849e-14
Ms4a6d	7.21457e-19	-1.04001	0.052	0.329	1.22366e-14
Asns	8.06176e-19	0.26498	0.355	0.077	1.36735e-14
Rpl35	8.87681e-19	0.366724	0.855	0.501	1.5056e-14
Med21	9.18025e-19	0.426932	0.465	0.14	1.55706e-14
Rn4.5s	9.28415e-19	0.415821	0.895	0.559	1.57469e-14
Kif20a	9.43716e-19	0.403118	0.5	0.166	1.60064e-14
Pdia3	9.62988e-19	0.294655	0.837	0.476	1.63332e-14
Spc24	9.96993e-19	0.437575	0.983	0.953	1.691e-14
Lsm3	1.21754e-18	0.429543	0.436	0.123	2.06506e-14
Sfxn5	1.30119e-18	-0.932468	0.221	0.509	2.20694e-14
Slc48a1	1.45012e-18	0.331949	0.593	0.236	2.45954e-14
Il17ra	1.458e-18	-1.1614	0.436	0.69	2.47291e-14
Cenpt	1.48841e-18	0.33849	0.343	0.071	2.52448e-14
Grina	1.4923e-18	-1.57793	0.453	0.561	2.53109e-14
Impa1	1.51324e-18	0.265662	0.477	0.15	2.5666e-14
Tmem258	1.56665e-18	0.321559	0.616	0.26	2.65719e-14
Nup85	1.59505e-18	0.29181	0.471	0.146	2.70536e-14
Plscr3	1.63084e-18	0.25346	0.558	0.209	2.76607e-14
Rps5	1.72529e-18	0.296327	0.936	0.626	2.92626e-14
Klf13	1.91703e-18	-0.384366	0.948	0.828	3.25148e-14
Cops3	1.9919e-18	0.334848	0.477	0.15	3.37846e-14
Rpa1	2.12547e-18	0.394001	0.494	0.164	3.60502e-14
Hist1h2an	2.2037e-18	0.324675	0.308	0.055	3.73769e-14
Rpa2	2.23974e-18	0.452429	0.413	0.111	3.79881e-14
Hsp90aa1	2.24901e-18	0.382464	0.64	0.292	3.81454e-14
Psmd13	2.32174e-18	0.281198	0.663	0.297	3.93791e-14
Anapc15	2.45906e-18	0.368153	0.407	0.109	4.17081e-14
Dbi	3.05521e-18	0.359624	0.634	0.278	5.18193e-14
Thoc7	3.25134e-18	0.299439	0.494	0.167	5.5146e-14
Mgst1	3.99868e-18	-0.910375	0.797	0.722	6.78216e-14
Ndufv2	4.12088e-18	0.324339	0.645	0.285	6.98942e-14
Gnpat	4.13745e-18	0.382602	0.535	0.197	7.01753e-14
Uqcrq	4.22957e-18	0.263632	0.727	0.368	7.17377e-14
Odf2	5.1308e-18	0.253944	0.471	0.149	8.70234e-14
Chchd2	5.13433e-18	0.352491	0.884	0.546	8.70834e-14
Fam173a	5.25952e-18	0.367115	0.547	0.203	8.92067e-14
Ly6c2	5.47029e-18	-1.43206	0.779	0.697	9.27816e-14
Ear1	5.49079e-18	-1.93848	0.326	0.565	9.31293e-14
Ccpg1	5.65927e-18	-1.40032	0.488	0.624	9.59869e-14
Apoa1bp	5.82285e-18	0.449326	0.477	0.153	9.87613e-14
Cox6b1	6.08359e-18	0.294689	0.727	0.373	1.03184e-13
Rpl7a	6.18253e-18	0.372148	0.802	0.443	1.04862e-13
Uqcr10	6.18999e-18	0.261284	0.547	0.222	1.04988e-13
Msn	6.83635e-18	-0.786441	0.866	0.814	1.15951e-13
Apmap	7.82482e-18	0.31891	0.326	0.065	1.32717e-13
Mphosph10	8.11858e-18	0.265193	0.442	0.132	1.37699e-13
Btg2	8.21133e-18	-1.35177	0.407	0.645	1.39272e-13
Ceacam10	8.34289e-18	-0.313848	0.82	0.501	1.41504e-13
Cops6	8.55168e-18	0.268357	0.64	0.286	1.45045e-13
Hdac1	9.8259e-18	0.339401	0.593	0.242	1.66657e-13
Fxyd5	9.99746e-18	-1.06257	0.814	0.813	1.69567e-13
Ewsr1	1.08802e-17	0.259147	0.82	0.467	1.8454e-13
Eif1ax	1.12602e-17	0.355569	0.494	0.171	1.90984e-13
Ctsc	1.73939e-17	-1.42495	0.18	0.398	2.95018e-13
Gltp	1.78463e-17	-0.300888	0.616	0.355	3.0269e-13
Psmb5	1.88314e-17	0.348791	0.552	0.214	3.194e-13
Kif2c	1.95033e-17	0.372619	0.372	0.098	3.30795e-13
Hist1h4a	2.01968e-17	0.275514	0.331	0.073	3.42557e-13
Nlrp3	2.09083e-17	-0.503594	0.029	0.295	3.54626e-13
Trem1	2.21727e-17	-1.28411	0.157	0.46	3.7607e-13
Atp6v1g1	2.3512e-17	-0.492778	0.831	0.632	3.98786e-13
1700123O20Rik	2.83175e-17	0.261108	0.564	0.225	4.80293e-13
Lcp2	2.83681e-17	-0.399129	0.884	0.713	4.81151e-13
Prim2	3.02548e-17	0.34403	0.337	0.074	5.13152e-13
Zbtbd6	3.2375e-17	0.278	0.221	0.047	5.49113e-13
Mdh1	3.32732e-17	0.315287	0.593	0.248	5.64347e-13
Tst	3.36416e-17	0.379205	0.279	0.048	5.70596e-13
Patz1	3.52869e-17	0.258309	0.355	0.084	5.98501e-13
Ndufa5	3.55835e-17	0.285115	0.477	0.162	6.03531e-13
Depdc1a	3.94055e-17	0.259107	0.291	0.055	6.68356e-13
Rpl13	3.9711e-17	0.272672	0.936	0.636	6.73538e-13
Rps15	4.41369e-17	0.327123	0.674	0.322	7.48606e-13
Hnrnpf	4.63908e-17	0.288863	0.919	0.626	7.86835e-13
Eif1ad	4.91653e-17	0.313373	0.459	0.151	8.33892e-13
Mrps18c	5.68818e-17	0.258122	0.494	0.178	9.64773e-13
Cd9	6.42862e-17	-0.313327	0.797	0.505	1.09036e-12
Cuedc2	6.9323e-17	0.338632	0.616	0.27	1.17579e-12
Inhba	7.14609e-17	0.416077	0.436	0.135	1.21205e-12
Emilin1	8.22274e-17	0.269951	0.453	0.147	1.39466e-12
Cct7	8.59384e-17	0.288317	0.651	0.302	1.4576e-12
Rps10	9.93641e-17	0.331029	0.733	0.383	1.68531e-12
Cfp	1.03933e-16	-1.28273	0.547	0.667	1.76281e-12
Fcgr3	1.08968e-16	-1.09664	0.727	0.711	1.8482e-12
Cetn3	1.14628e-16	0.275862	0.552	0.221	1.94421e-12
Mpeg1	1.18339e-16	-1.07577	0.273	0.468	2.00715e-12
Rnf7	1.39839e-16	0.296401	0.494	0.178	2.37181e-12
Rnf167	1.4531e-16	-0.340462	0.779	0.496	2.46461e-12
Sell	1.49734e-16	-1.32828	0.814	0.815	2.53964e-12
Ska3	1.76442e-16	0.299929	0.529	0.313	2.99263e-12
Lyz1	1.89806e-16	-0.598162	0.977	0.977	3.21931e-12
Rfc3	1.90335e-16	0.324577	0.331	0.076	3.22826e-12
Fpr1	2.05235e-16	-1.70292	0.116	0.384	3.48098e-12
Map3k1	2.38256e-16	-0.489367	0.494	0.605	4.04106e-12
Cotl1	2.42936e-16	-0.304714	0.86	0.642	4.12044e-12
Uba2	2.53254e-16	0.316651	0.547	0.217	4.29544e-12
Pih1d1	2.62022e-16	0.28988	0.494	0.182	4.44415e-12
Arl6ip1	2.62416e-16	0.390069	0.866	0.55	4.45085e-12
Irf8	2.85351e-16	-0.707505	0.076	0.317	4.83984e-12
Rpl39	3.42245e-16	0.263192	0.68	0.36	5.80482e-12
Anapc13	3.8144e-16	0.350898	0.448	0.152	6.46961e-12
Clta	3.91321e-16	-0.397466	0.703	0.477	6.6372e-12
Gm10845	5.20709e-16	-0.324943	0.988	0.968	8.83175e-12
Aup1	5.26607e-16	-0.326758	0.86	0.613	8.93178e-12
Ier2	5.35475e-16	-1.04214	0.831	0.829	9.0822e-12
Rbmxl1	5.56883e-16	0.408932	0.459	0.157	9.4453e-12
Ms4a6b	5.60074e-16	-0.875586	0.064	0.314	9.49941e-12
Mrpl33	5.91142e-16	-0.355287	0.663	0.422	1.00264e-11
Lgals1	6.87021e-16	-1.43571	0.169	0.375	1.16526e-11
Gpr160	6.89297e-16	0.285635	0.401	0.118	1.16912e-11
Lrch4	7.2124e-16	-0.373252	0.733	0.497	1.2233e-11
Gm11710	7.67538e-16	-0.486815	0.012	0.232	1.30182e-11
Gm11711	7.67538e-16	-0.486815	0.012	0.232	1.30182e-11
Uqcrc1	7.98904e-16	0.281258	0.762	0.422	1.35502e-11
Capg	8.04304e-16	-0.86022	0.017	0.243	1.36418e-11
Cebpd	8.78518e-16	-0.269558	0.744	0.449	1.49005e-11
Traip	9.2644e-16	0.329291	0.256	0.043	1.57134e-11
Ptp4a2	9.26483e-16	-0.434931	0.994	0.835	1.57141e-11
Fis1	1.02886e-15	-0.269259	0.866	0.627	1.74505e-11
Acd	1.0468e-15	0.315694	0.407	0.125	1.77547e-11
Reep4	1.15401e-15	0.396978	0.407	0.124	1.95731e-11
Ptpn6	1.34239e-15	-0.643544	0.942	0.811	2.27683e-11
Abcf2	1.36115e-15	0.284064	0.465	0.163	2.30865e-11
Snrpd3	1.44416e-15	0.35197	0.61	0.278	2.44944e-11
Pde6d	1.49699e-15	0.290435	0.407	0.126	2.53905e-11
Rpl18a	1.52222e-15	0.261392	0.959	0.703	2.58183e-11
Psma6	1.54718e-15	0.406264	0.599	0.268	2.62417e-11
Drg1	1.54905e-15	0.309986	0.523	0.207	2.62735e-11
Capn2	1.87835e-15	-0.560848	0.035	0.262	3.18586e-11
Ada	1.97487e-15	0.292459	0.233	0.034	3.34958e-11
Nxt1	2.04895e-15	0.447682	0.378	0.108	3.47522e-11
Plek	2.46597e-15	-1.00246	0.198	0.473	4.18254e-11
Get4	2.4843e-15	0.269357	0.552	0.232	4.21363e-11
Dazap2	2.52955e-15	-0.781676	0.983	0.909	4.29037e-11
Ddx39	2.87481e-15	0.279761	0.576	0.251	4.87597e-11
Tbca	3.10694e-15	0.30022	0.5	0.192	5.26968e-11
Pilrb1	3.36081e-15	-0.424261	0.738	0.514	5.70027e-11
Msrb1	3.83203e-15	-0.562245	0.895	0.874	6.49951e-11
Myeov2	3.8861e-15	0.275626	0.587	0.271	6.59121e-11
Lims1	3.94237e-15	-0.363823	0.843	0.668	6.68665e-11
Arhgef10l	4.41044e-15	-0.487938	0.023	0.243	7.48056e-11
Tbc1d10c	4.74566e-15	-0.622721	0.529	0.346	8.04912e-11
M6pr	4.75549e-15	0.283893	0.669	0.336	8.06579e-11
Gpi1	5.48318e-15	0.358155	1	0.939	9.30003e-11
Prodh	6.47261e-15	0.251953	0.238	0.038	1.09782e-10
Map1lc3b	6.49418e-15	-1.04501	0.727	0.743	1.10148e-10
Nutf2-ps1	6.64552e-15	0.378302	0.471	0.174	1.12715e-10
Mrps17	6.72374e-15	0.279268	0.436	0.152	1.14041e-10
Prr14	6.86804e-15	-0.268127	0.674	0.422	1.16489e-10
Rps25	7.06229e-15	0.315368	0.82	0.5	1.19784e-10
Ddost	7.36109e-15	0.290998	0.709	0.379	1.24851e-10
Trf	8.06003e-15	-1.81986	0.227	0.482	1.36706e-10
Cd244	8.06809e-15	-0.684923	0.012	0.225	1.36843e-10
Haus4	8.19284e-15	0.293952	0.331	0.085	1.38959e-10
Hrsp12	9.34855e-15	0.268562	0.273	0.054	1.58561e-10
Cdkn1a	9.64228e-15	-0.659517	0.506	0.403	1.63543e-10
Cd53	9.8954e-15	-0.773496	0.93	0.937	1.67836e-10
Crip1	1.04138e-14	-1.16721	0.227	0.324	1.76628e-10
Atg16l2	1.04397e-14	0.289854	0.413	0.135	1.77067e-10
Rassf4	1.07146e-14	-0.4427	0.145	0.384	1.8173e-10
Cyc1	1.08777e-14	0.359324	0.564	0.247	1.84497e-10
Pttg1	1.24426e-14	0.384405	0.477	0.179	2.11039e-10
Cdc42	1.29808e-14	-0.468374	0.942	0.803	2.20167e-10
Ramp1	1.50883e-14	0.381358	0.424	0.15	2.55912e-10
Psmd14	1.77614e-14	0.251347	0.581	0.267	3.01251e-10
Rps2	1.91759e-14	0.344698	0.814	0.5	3.25242e-10
Hist1h2ad	1.98626e-14	0.299584	0.337	0.092	3.3689e-10
Fkbp4	2.27219e-14	0.317929	0.488	0.19	3.85386e-10
Cdc42se1	2.54715e-14	-0.809899	0.738	0.691	4.32023e-10
Pygl	2.81923e-14	-0.444412	0.919	0.685	4.78169e-10
Mpp7	3.10645e-14	0.284393	0.593	0.347	5.26885e-10
Tmem109	3.16106e-14	-0.603033	0.012	0.208	5.36148e-10
Gm12505	3.18719e-14	-0.809452	0.715	0.722	5.40579e-10
Smarcb1	3.2155e-14	0.273569	0.488	0.192	5.45381e-10
Sh3kbp1	3.58225e-14	-0.259334	0.831	0.587	6.07585e-10
Hist1h1c	3.66456e-14	-0.890853	0.738	0.543	6.21546e-10
Ccr1	3.77629e-14	-1.33374	0.192	0.476	6.40496e-10
Mndal	3.80185e-14	-0.709066	0.122	0.346	6.44831e-10
L1cam	4.50153e-14	-0.480548	0.058	0.3	7.63505e-10
Snrpa1	5.26719e-14	0.304037	0.453	0.17	8.93368e-10
Klf6	5.41001e-14	-0.9371	0.541	0.672	9.17592e-10
Gipc1	5.47266e-14	0.259631	0.564	0.254	9.28218e-10
Cmtm6	5.54616e-14	-1.06828	0.634	0.635	9.40684e-10
Rnd3	5.78843e-14	-0.350666	0.017	0.232	9.81776e-10
Bcl6	5.90775e-14	-0.650507	0.465	0.516	1.00201e-09
Ear10	5.95438e-14	-1.53912	0.262	0.517	1.00992e-09
Taf6	6.18636e-14	0.286146	0.401	0.133	1.04927e-09
Plin3	6.36653e-14	0.291464	0.692	0.401	1.07983e-09
Arhgdia	6.39228e-14	-0.305306	0.849	0.622	1.0842e-09
Bcat2	6.54982e-14	0.286743	0.471	0.183	1.11092e-09
Hmmr	6.75418e-14	0.292964	0.907	0.76	1.14558e-09
Rbm47	7.0749e-14	-0.394352	0.116	0.367	1.19997e-09
Ist1	7.07705e-14	-0.324561	0.599	0.364	1.20034e-09
Bin2	8.28971e-14	-0.633309	0.843	0.673	1.40602e-09
Rpl14	9.07821e-14	0.305289	0.808	0.5	1.53976e-09
Rnf44	9.21352e-14	-0.298966	0.645	0.535	1.56271e-09
Fn1	9.6226e-14	-0.624393	0.081	0.303	1.63209e-09
Cdc42ep3	1.04851e-13	-0.275002	0.61	0.378	1.77838e-09
Capn1	1.07697e-13	-0.355749	0.68	0.467	1.82665e-09
Rin2	1.30334e-13	-0.42592	0.058	0.3	2.2106e-09
Adrb2	1.39666e-13	-1.35263	0.145	0.385	2.36888e-09
Npc2	1.45077e-13	-0.622084	0.61	0.528	2.46065e-09
Prdx1	1.47672e-13	-0.908313	0.442	0.452	2.50466e-09
Tlr13	1.56778e-13	-0.734292	0.052	0.266	2.65911e-09
Gm5150	1.57814e-13	-1.00398	0.041	0.267	2.67668e-09
Mtpn	1.721e-13	-0.316025	0.86	0.66	2.91898e-09
Top3b	1.75376e-13	0.252185	0.378	0.122	2.97456e-09
Cx3cr1	1.79924e-13	-0.964201	0.186	0.423	3.0517e-09
Krtcap2	1.84498e-13	0.646271	0.523	0.226	3.12928e-09
Gm2382	1.96018e-13	-0.39678	0.512	0.359	3.32467e-09
Pa2g4	2.06369e-13	0.311887	0.471	0.186	3.50022e-09
Npm1	2.06952e-13	0.38067	0.657	0.343	3.51011e-09
Adam19	2.20307e-13	-0.306059	0.081	0.324	3.73663e-09
Ube2e3	2.22796e-13	0.260288	0.285	0.067	3.77884e-09
Tmem138	2.24498e-13	0.262443	0.262	0.057	3.80771e-09
Ndufab1	2.29637e-13	0.30176	0.43	0.158	3.89487e-09
Rpl23	2.43593e-13	0.346153	0.849	0.596	4.13158e-09
Rhog	2.55398e-13	-0.296648	0.924	0.696	4.3318e-09
Slc25a17	2.67742e-13	0.272304	0.419	0.15	4.54118e-09
Ybx1	2.772e-13	0.252664	0.721	0.411	4.7016e-09
Ldhb	2.78259e-13	0.340715	0.244	0.049	4.71956e-09
Ddrgk1	3.24821e-13	0.301651	0.413	0.147	5.50929e-09
Krt80	3.25198e-13	-0.489552	0.006	0.188	5.51568e-09
Xrcc1	3.4501e-13	0.261886	0.326	0.091	5.85171e-09
Il10ra	3.73334e-13	-0.469262	0.006	0.188	6.33212e-09
Dusp6	3.74675e-13	-1.22604	0.366	0.589	6.35486e-09
Cd300ld	4.2447e-13	-0.850379	0.035	0.246	7.19944e-09
Ndufc2	4.27769e-13	0.276374	0.459	0.188	7.25539e-09
Hat1	4.31698e-13	0.333026	0.39	0.132	7.32203e-09
Amica1	4.76133e-13	-1.0251	0.035	0.237	8.07569e-09
Troap	4.77748e-13	0.256798	0.273	0.064	8.10308e-09
Ctsd	4.80728e-13	-1.16281	0.802	0.8	8.15362e-09
Cd37	4.93025e-13	-0.346358	0.802	0.549	8.3622e-09
G6pc3	5.05524e-13	0.358948	0.262	0.061	8.57419e-09
Hspa8	5.49691e-13	-0.267909	0.994	0.811	9.3233e-09
Cmtm7	5.85437e-13	0.350467	0.826	0.532	9.9296e-09
Sdcbp	5.93707e-13	-0.390315	0.907	0.712	1.00699e-08
Wdr92	6.00017e-13	-0.5669	0.907	0.87	1.01769e-08
Ccr2	6.11999e-13	-0.740285	0.244	0.434	1.03801e-08
Ctsa	6.4044e-13	-1.00523	0.523	0.57	1.08625e-08
Atp6v1b2	6.48606e-13	-0.431917	0.738	0.54	1.1001e-08
Emr4	6.61526e-13	-1.07843	0.041	0.247	1.12201e-08
Nup62	6.88746e-13	0.452811	0.366	0.127	1.16818e-08
Mrpl13	7.53219e-13	0.393782	0.291	0.074	1.27754e-08
1810033B17Rik	7.55711e-13	-0.303817	0.814	0.573	1.28176e-08
Prex1	9.43112e-13	-0.411624	0.174	0.449	1.59961e-08
Pgd	9.7691e-13	-0.264803	0.948	0.727	1.65694e-08
Itgal	9.99048e-13	-0.853801	0.558	0.623	1.69449e-08
Gng2	1.01261e-12	-0.293334	0.093	0.333	1.71749e-08
Cd300a	1.03065e-12	-0.829056	0.965	0.96	1.74809e-08
Rab31	1.03853e-12	-0.362424	0.919	0.743	1.76145e-08
Nadk	1.15688e-12	-0.819721	0.779	0.75	1.96219e-08
Nfkbia	1.17362e-12	-0.292165	0.808	0.559	1.99058e-08
Nfkbiz	1.1795e-12	-0.798706	0.419	0.622	2.00055e-08
Tmx2	1.25094e-12	0.306819	0.43	0.165	2.12171e-08
Ndufaf3	1.31885e-12	0.284586	0.326	0.097	2.2369e-08
Nfatc1	1.35687e-12	-0.339849	0.698	0.547	2.30139e-08
Aarsd1	1.37133e-12	0.318844	0.372	0.124	2.32591e-08
2019-09-09	1.41249e-12	-0.427313	0.721	0.57	2.39572e-08
Impdh2	1.45076e-12	0.476567	0.541	0.25	2.46063e-08
Clec4a1	1.48136e-12	-0.973666	0.128	0.301	2.51253e-08
Tnfsf13	1.53433e-12	0.263014	0.413	0.153	2.60237e-08
Ostf1	1.55906e-12	-0.525091	0.959	0.84	2.64432e-08
Mrpl44	1.7204e-12	0.299036	0.291	0.077	2.91797e-08
Cd14	1.84486e-12	-1.58483	0.36	0.52	3.12907e-08
Limd2	2.01722e-12	-0.485858	0.977	0.852	3.42141e-08
Irf2	2.0265e-12	-0.422357	0.547	0.522	3.43715e-08
Pdcd5	2.13091e-12	0.350857	0.459	0.189	3.61424e-08
Gpaa1	2.26221e-12	0.449148	0.395	0.142	3.83693e-08
Susd3	2.41774e-12	-1.17172	0.11	0.297	4.10072e-08
Ncoa3	2.72563e-12	-0.326301	0.599	0.683	4.62294e-08
C330006A16Rik	2.75755e-12	0.289875	0.68	0.38	4.67707e-08
Npl	2.79341e-12	0.250727	0.238	0.05	4.7379e-08
S100a11	2.93754e-12	-0.515703	0.965	0.805	4.98237e-08
Dlgap5	3.14232e-12	0.276603	0.529	0.297	5.32969e-08
Paics	3.17806e-12	0.294816	0.529	0.243	5.3903e-08
Pilrb2	3.19779e-12	-0.371521	0.674	0.489	5.42377e-08
Timm50	3.3254e-12	0.31643	0.424	0.163	5.6402e-08
H3f3a	3.55237e-12	-0.264491	0.983	0.841	6.02518e-08
Fam64a	3.63073e-12	0.388465	0.273	0.07	6.15808e-08
Pi16	3.63838e-12	-0.64009	0.663	0.51	6.17106e-08
Serp1	3.71139e-12	-0.505758	0.802	0.63	6.29488e-08
Rasa4	4.11776e-12	-0.379408	0.017	0.205	6.98413e-08
Il1b	4.18606e-12	-2.22899	0.052	0.232	7.09997e-08
Hist2h2aa1	4.29876e-12	-0.862344	0.448	0.415	7.29112e-08
Cytip	4.36011e-12	-0.57286	0.32	0.45	7.39517e-08
Timm23	4.40395e-12	0.329792	0.547	0.26	7.46954e-08
Pmm1	4.58719e-12	0.276091	0.25	0.057	7.78033e-08
Abcg1	4.72899e-12	-0.584517	0.36	0.477	8.02084e-08
Rpl23a	4.77114e-12	0.330835	0.686	0.39	8.09233e-08
Kctd20	4.88051e-12	-0.292111	0.64	0.433	8.27784e-08
Emr1	5.20263e-12	-0.858933	0.052	0.264	8.82419e-08
Ssr4	5.40891e-12	0.41549	0.593	0.301	9.17406e-08
Cdk4	5.41673e-12	0.411501	0.558	0.271	9.18731e-08
Cxcr2	5.5231e-12	-1.32233	1	0.959	9.36773e-08
Mxd3	5.73221e-12	0.324668	0.233	0.049	9.7224e-08
Arpc5	6.02917e-12	-0.655006	0.959	0.902	1.02261e-07
Arhgdib	6.39416e-12	0.338382	1	0.965	1.08451e-07
Gm16894	6.7633e-12	-0.44701	0.052	0.239	1.14712e-07
Pxn	7.06774e-12	-0.257229	0.785	0.584	1.19876e-07
Rnase6	7.50648e-12	-0.582876	0	0.142	1.27317e-07
Ugt1a7c	7.63972e-12	-0.499135	0.081	0.303	1.29577e-07
Lamp2	7.68919e-12	-0.344333	0.855	0.65	1.30416e-07
Trib1	8.10123e-12	-0.624602	0.238	0.424	1.37405e-07
Dok3	8.29665e-12	-0.386298	0.855	0.665	1.40719e-07
Lat2	8.34945e-12	-0.755887	0.081	0.284	1.41615e-07
Plxnb2	8.58527e-12	-0.425687	0.07	0.261	1.45615e-07
Nfe2	9.36702e-12	-0.586738	0.802	0.625	1.58874e-07
F13a1	9.53794e-12	-1.35525	0.209	0.393	1.61773e-07
AI607873	9.57179e-12	-0.283064	0.023	0.213	1.62347e-07
Pole3	9.75665e-12	0.410102	0.297	0.084	1.65483e-07
Dbnl	9.82767e-12	-0.390572	0.762	0.551	1.66687e-07
Lcn2	9.96585e-12	0.315267	0.849	0.59	1.69031e-07
Ndufb2	1.00232e-11	0.356656	0.378	0.137	1.70003e-07
Pycard	1.03011e-11	-0.286575	0.453	0.322	1.74717e-07
Exosc7	1.10384e-11	0.398713	0.39	0.145	1.87222e-07
Rab32	1.15644e-11	-0.309722	0.738	0.526	1.96143e-07
Rnf125	1.164e-11	0.255956	0.192	0.032	1.97426e-07
Suv39h1	1.20168e-11	0.261637	0.326	0.107	2.03816e-07
Rab8a	1.26774e-11	-0.280058	0.767	0.53	2.15021e-07
Hnrnpc	1.27428e-11	-0.263482	0.767	0.53	2.1613e-07
Ppapdc1b	1.28907e-11	0.312055	0.308	0.093	2.1864e-07
Mthfs	1.37906e-11	-0.315913	0.424	0.25	2.33903e-07
Themis2	1.38516e-11	-0.783395	0.157	0.355	2.34936e-07
Akap13	1.40617e-11	-0.314569	0.802	0.698	2.38501e-07
Gabarap	1.40663e-11	-0.532081	0.93	0.815	2.38578e-07
Clec7a	1.40893e-11	-1.04367	0.081	0.298	2.38969e-07
G0s2	1.48289e-11	-0.571016	0.401	0.238	2.51513e-07
Cops5	1.88142e-11	0.353493	0.39	0.15	3.19108e-07
Dcaf12	1.90752e-11	-0.458248	0.494	0.387	3.23535e-07
Gnb2l1	1.97234e-11	0.302009	0.657	0.371	3.34528e-07
Hopx	1.97854e-11	-0.527995	0.047	0.232	3.35581e-07
Tacstd2	1.98952e-11	-0.475719	0.273	0.197	3.37442e-07
Sgms1	2.10484e-11	-0.452598	0.047	0.257	3.57002e-07
Eif1	2.15081e-11	-0.496052	1	0.98	3.64799e-07
Snrpd2	2.15975e-11	0.267582	0.407	0.16	3.66315e-07
Cdc123	2.17122e-11	0.284507	0.895	0.79	3.68261e-07
Nr4a1	2.17865e-11	-1.8807	0.18	0.383	3.69521e-07
Rpl36a	2.22044e-11	0.452498	0.651	0.363	3.76609e-07
Lst1	2.2285e-11	-0.386892	0.477	0.326	3.77976e-07
Unc93b1	2.24248e-11	-0.72304	0.698	0.608	3.80347e-07
Ear6	2.24339e-11	-1.68	0.221	0.48	3.80501e-07
Stx5a	2.25226e-11	-0.315438	0.488	0.3	3.82005e-07
Rad51ap1	2.3471e-11	0.260554	0.25	0.064	3.98091e-07
Cln6	2.58391e-11	0.295721	0.401	0.157	4.38257e-07
Gngt2	2.61189e-11	-1.05595	0.017	0.174	4.43003e-07
Smpdl3a	2.68153e-11	-0.98431	0.547	0.555	4.54814e-07
Vasp	2.79047e-11	-0.436261	0.901	0.747	4.73292e-07
Dusp3	2.84655e-11	-0.399975	0.174	0.362	4.82804e-07
Zfp710	2.99816e-11	-0.345886	0.576	0.529	5.08517e-07
Myo1f	3.10185e-11	-0.792001	0.849	0.84	5.26104e-07
Csf2ra	3.11765e-11	-0.262027	0.919	0.717	5.28784e-07
Trappc6a	3.61477e-11	0.307832	0.326	0.105	6.13101e-07
Slfn2	3.74662e-11	-0.920989	0.733	0.772	6.35465e-07
Nudt5	3.75595e-11	0.263201	0.349	0.121	6.37046e-07
Lyz2	3.82841e-11	-0.559022	1	0.996	6.49337e-07
Hist1h2bc	4.2709e-11	-0.484175	0.314	0.143	7.24388e-07
Slc15a3	4.33657e-11	-0.298016	0.012	0.176	7.35525e-07
Atf3	4.52991e-11	-0.746146	0.023	0.197	7.68318e-07
Fam49a	4.54741e-11	-0.343322	0.029	0.21	7.71287e-07
Ppp1r18	4.58855e-11	-0.367878	0.884	0.768	7.78264e-07
Cenpp	4.6518e-11	0.262973	0.203	0.046	7.88992e-07
Ccne1	5.2705e-11	0.34186	0.256	0.068	8.93929e-07
A530064D06Rik	5.40018e-11	-0.28231	0.651	0.663	9.15925e-07
Ddx1	5.80488e-11	0.251126	0.395	0.154	9.84566e-07
Hist1h1e	5.80726e-11	0.282047	0.744	0.485	9.8497e-07
Mboat7	5.85151e-11	-0.405284	0.674	0.487	9.92475e-07
Ndufs8	5.90124e-11	0.330578	0.547	0.274	1.00091e-06
Ptpro	6.20862e-11	-0.311731	0.029	0.196	1.05304e-06
Magoh	6.40845e-11	0.302777	0.372	0.138	1.08694e-06
Leng8	6.45751e-11	-0.268743	0.669	0.538	1.09526e-06
Nupr1	6.47594e-11	-0.707693	0.017	0.179	1.09838e-06
Stk10	6.48166e-11	-0.765278	0.64	0.633	1.09935e-06
Abi3	6.53349e-11	-0.485933	0.035	0.212	1.10815e-06
Ear11	6.64552e-11	-0.315387	0.116	0.357	1.12715e-06
Pdlim1	6.69969e-11	-0.323722	0	0.13	1.13633e-06
Sfpi1	6.70011e-11	-0.379754	0.913	0.75	1.13641e-06
Uqcr11	6.75013e-11	0.272145	0.488	0.233	1.14489e-06
Psmd7	7.08453e-11	0.315967	0.483	0.221	1.20161e-06
1600014C10Rik	7.42336e-11	-0.307388	0.645	0.432	1.25908e-06
Tmem59	7.74329e-11	-0.310483	0.674	0.458	1.31334e-06
Kdm6b	7.79315e-11	-0.340053	0.919	0.917	1.3218e-06
Arl5c	8.16498e-11	-0.318413	0	0.129	1.38486e-06
Slc2a3	9.25724e-11	-0.989495	0.483	0.473	1.57012e-06
Capza1	9.47701e-11	-0.256476	0.965	0.798	1.60739e-06
Arpc2	1.05385e-10	-0.426134	0.994	0.904	1.78743e-06
Plac8	1.09677e-10	0.284979	0.785	0.515	1.86023e-06
Creg1	1.22402e-10	-0.936145	0.459	0.516	2.07607e-06
C5ar1	1.23706e-10	-0.95582	0.605	0.582	2.09817e-06
Slc35a4	1.29833e-10	0.271503	0.471	0.215	2.2021e-06
Psmg1	1.33353e-10	0.300334	0.279	0.082	2.2618e-06
Glipr1	1.3905e-10	-0.993178	0.32	0.435	2.35842e-06
Hist1h2bm	1.41425e-10	0.451131	0.203	0.042	2.3987e-06
Shmt1	1.48747e-10	0.268031	0.215	0.06	2.5229e-06
Whsc1l1	1.48781e-10	-0.350777	0.767	0.633	2.52347e-06
Ncstn	1.521e-10	-0.356776	0.605	0.434	2.57976e-06
Evi2a	1.52589e-10	-0.771202	0.407	0.476	2.58806e-06
Plaur	1.85559e-10	-0.982953	0.767	0.778	3.14726e-06
Coro1b	1.98312e-10	-0.656787	0.68	0.558	3.36357e-06
Cdk2ap2	2.02214e-10	-0.614688	0.919	0.75	3.42976e-06
Vim	2.03176e-10	-0.495035	0.948	0.77	3.44607e-06
Jak1	2.20473e-10	-0.314163	0.715	0.514	3.73944e-06
Wbp1	2.24166e-10	0.275766	0.36	0.135	3.80209e-06
D4Wsu53e	2.37221e-10	-0.574648	0.826	0.715	4.0235e-06
Cxcr4	2.39537e-10	-0.497778	0.994	0.925	4.06279e-06
Pid1	2.70682e-10	-0.336168	0.064	0.255	4.59103e-06
Msr1	2.71279e-10	-0.302864	0.006	0.15	4.60117e-06
Mmadhc	2.89539e-10	0.272248	0.407	0.17	4.91088e-06
Ccdc101	2.99071e-10	0.358412	0.291	0.092	5.07254e-06
Cd300lh	3.18094e-10	-0.509722	0.017	0.159	5.3952e-06
Zyx	3.22715e-10	-0.82098	0.89	0.87	5.47358e-06
Tapbp	3.50764e-10	-0.404446	0.849	0.663	5.94931e-06
Gdi1	3.5981e-10	-0.397261	0.622	0.453	6.10274e-06
Pdlim7	3.72298e-10	-0.62219	0.401	0.325	6.31455e-06
Ubc	3.75165e-10	-0.899466	0.791	0.779	6.36317e-06
Ssu72	4.15564e-10	-0.352184	0.686	0.504	7.04839e-06
Mob1a	4.18077e-10	-0.275494	0.628	0.43	7.09101e-06
Rps12	4.31055e-10	0.371995	0.541	0.287	7.31112e-06
Atp5g1	4.52781e-10	0.415509	0.494	0.239	7.67962e-06
Irak4	4.97841e-10	-0.352623	0.698	0.583	8.44387e-06
Serinc3	5.12668e-10	-0.345388	0.802	0.649	8.69536e-06
H2-DMa	5.13902e-10	-0.583798	0.047	0.238	8.71629e-06
Fam65b	5.19157e-10	-0.997545	0.692	0.715	8.80542e-06
Cd97	5.22583e-10	-0.495323	0.727	0.553	8.86353e-06
Tmcc1	5.77174e-10	-0.409407	0.163	0.382	9.78944e-06
Fgr	5.78103e-10	-0.918397	0.587	0.695	9.80521e-06
Adipor1	6.09733e-10	-0.871025	0.872	0.804	1.03417e-05
Anxa5	6.31556e-10	-0.74676	0.506	0.497	1.07118e-05
Hmbs	6.36675e-10	0.283961	0.343	0.127	1.07987e-05
Eif4a2	6.36755e-10	-0.258087	0.61	0.414	1.08e-05
Ndfip1	6.50178e-10	-0.461064	0.547	0.416	1.10277e-05
Fmnl1	6.89431e-10	-0.416966	0.506	0.66	1.16934e-05
4930470H14Rik	7.20102e-10	-0.749447	0.884	0.87	1.22136e-05
Raf1	7.46778e-10	-0.884729	0.488	0.495	1.26661e-05
1110007C09Rik	7.59628e-10	-0.679269	0.605	0.528	1.2884e-05
Ifngr2	8.13351e-10	-0.951959	0.622	0.635	1.37952e-05
Lpcat2	8.3069e-10	-0.75922	0.494	0.42	1.40893e-05
Farsa	8.7165e-10	0.295011	0.343	0.128	1.47841e-05
Max	9.43725e-10	-0.575101	0.634	0.507	1.60065e-05
Ctsh	9.48324e-10	-0.666393	0.517	0.527	1.60845e-05
Nfam1	9.57266e-10	-0.807617	0.802	0.786	1.62362e-05
Actl6a	1.01139e-09	0.263544	0.349	0.134	1.71542e-05
B430010I23Rik	1.13725e-09	-0.409638	0.5	0.363	1.92888e-05
Sdhb	1.14198e-09	-0.361818	0.523	0.365	1.93692e-05
Dnajb6	1.14793e-09	-0.261621	0.512	0.323	1.947e-05
Ssr2	1.1506e-09	0.355799	0.512	0.259	1.95153e-05
Cd302	1.16896e-09	-0.400012	0.035	0.18	1.98267e-05
Txnl4b	1.28473e-09	-0.459064	0.529	0.36	2.17903e-05
Cap1	1.29468e-09	-0.487842	0.965	0.926	2.1959e-05
Anxa6	1.31888e-09	-0.79533	0.186	0.374	2.23695e-05
Gins2	1.36905e-09	0.306046	0.238	0.065	2.32204e-05
Hnrnpa1	1.41325e-09	0.276371	0.372	0.155	2.39702e-05
Tifab	1.48804e-09	-0.489108	0.221	0.337	2.52387e-05
Slc11a1	1.49713e-09	-0.823719	0.192	0.377	2.53928e-05
Lgmn	1.52644e-09	-0.720041	0.041	0.202	2.58899e-05
Dhrs3	1.54779e-09	-0.384879	0.709	0.508	2.62521e-05
Rtp4	1.56032e-09	-1.16241	0.076	0.245	2.64646e-05
Ncf2	1.64011e-09	-0.860005	0.651	0.69	2.7818e-05
Lyn	1.65909e-09	-0.784819	0.576	0.666	2.81399e-05
Bmx	1.75972e-09	-0.50551	0.134	0.349	2.98466e-05
Gpr114	1.90308e-09	-0.444211	0.029	0.182	3.22781e-05
Hist1h4i	1.91393e-09	-0.322216	0.343	0.158	3.24621e-05
Wfdc17	1.9434e-09	-0.876018	0.012	0.146	3.29619e-05
Ace	1.94756e-09	-0.490188	0.012	0.15	3.30325e-05
Egr1	1.95857e-09	-1.50646	0.081	0.226	3.32192e-05
Sla	1.96264e-09	-0.307027	0.692	0.489	3.32884e-05
Sirt7	1.99061e-09	-0.367212	0.616	0.404	3.37627e-05
Hmha1	2.06424e-09	-0.595959	0.93	0.813	3.50116e-05
Arl6ip5	2.35061e-09	-0.547539	0.5	0.46	3.98687e-05
Skap2	2.38865e-09	-0.36648	0.61	0.439	4.05138e-05
Trex1	2.44954e-09	-0.967209	0.209	0.342	4.15466e-05
Gapt	2.50481e-09	-0.262437	0.587	0.389	4.24841e-05
Sephs2	2.50704e-09	-0.586299	0.919	0.746	4.25218e-05
Coro1a	2.54322e-09	-0.543539	0.994	0.948	4.31355e-05
Tmem134	2.55433e-09	-0.288117	0.453	0.329	4.33241e-05
Idh3a	2.61439e-09	0.283597	0.349	0.139	4.43426e-05
Itgb2	2.66655e-09	-0.613848	0.959	0.934	4.52273e-05
Lasp1	2.75482e-09	-0.270137	0.744	0.538	4.67245e-05
Gda	2.95206e-09	-0.35983	0.744	0.574	5.00699e-05
Degs1	3.07633e-09	-0.451636	0.738	0.617	5.21776e-05
Ruvbl2	3.21992e-09	0.278763	0.36	0.148	5.46131e-05
Nrm	3.4528e-09	0.265538	0.378	0.159	5.85629e-05
Hiatl1	3.46401e-09	-0.256438	0.791	0.589	5.87531e-05
Neat1	3.54877e-09	-0.823337	0.663	0.63	6.01907e-05
A130077B15Rik	3.56273e-09	-0.323488	1	0.997	6.04275e-05
Plbd1	3.57991e-09	-0.799053	0.68	0.79	6.07188e-05
Ctsz	4.08007e-09	-0.621239	0.721	0.566	6.9202e-05
Ccl9	4.26798e-09	-0.460203	0.349	0.465	7.23893e-05
4632428N05Rik	4.28438e-09	-0.55627	0.82	0.759	7.26674e-05
2019-03-01	4.28966e-09	-0.477704	0.174	0.373	7.2757e-05
Lrrc25	4.58067e-09	-0.798571	0.18	0.361	7.76928e-05
Tmem51	4.82366e-09	-0.693638	0.023	0.166	8.18141e-05
Tsta3	5.05001e-09	0.253362	0.32	0.124	8.56532e-05
Akip1	5.09316e-09	0.256197	0.256	0.079	8.6385e-05
Treml4	5.10515e-09	-1.33113	0.064	0.199	8.65884e-05
Akr1a1	5.66694e-09	-0.272961	0.674	0.462	9.61169e-05
1110001J03Rik	5.69399e-09	0.257761	0.198	0.051	9.65758e-05
Abtb1	5.74043e-09	-0.687089	0.459	0.359	9.73635e-05
Taldo1	5.95416e-09	-0.610693	0.971	0.908	0.000100989
Cd84	6.00669e-09	-0.761448	0.669	0.685	0.00010188
Ccdc109b	6.43808e-09	-0.35002	0.006	0.129	0.000109196
Sqstm1	6.50764e-09	-0.824319	0.663	0.633	0.000110376
Prkab1	6.56139e-09	-0.25561	0.372	0.211	0.000111288
Apobec1	6.70714e-09	-0.808819	0.134	0.329	0.00011376
Acp5	6.84088e-09	-0.321969	0.326	0.179	0.000116028
Gng10	7.00764e-09	-0.50008	0.407	0.367	0.000118857
Cd44	7.1269e-09	-0.718803	0.698	0.739	0.000120879
Pbxip1	7.24598e-09	-0.723668	0.453	0.492	0.000122899
Carhsp1	7.60826e-09	-0.26748	0.5	0.326	0.000129044
Glud1	7.95783e-09	-0.495336	0.634	0.523	0.000134973
Dhrs7	8.01788e-09	-0.607762	0.663	0.502	0.000135991
Emc4	8.16224e-09	0.344819	0.343	0.139	0.00013844
Hexa	8.23776e-09	-0.26425	0.767	0.555	0.000139721
Capzb	8.41553e-09	-0.343586	0.936	0.802	0.000142736
Dfna5	8.75948e-09	-0.350505	0.343	0.185	0.000148569
Psmb8	8.94189e-09	-0.719176	0.517	0.445	0.000151663
Ccdc12	9.31531e-09	-0.358846	0.506	0.389	0.000157997
Cd82	9.38789e-09	-0.747361	0.5	0.414	0.000159228
Grn	9.65784e-09	-0.258075	0.756	0.563	0.000163807
Rnf114	9.99758e-09	-0.379369	0.552	0.399	0.000169569
Mob3a	1.04369e-08	-0.555978	0.616	0.487	0.00017702
Bnip3l	1.13856e-08	-0.254443	0.645	0.465	0.000193111
Cyth4	1.16854e-08	-0.795353	0.5	0.539	0.000198196
Litaf	1.206e-08	-0.76127	0.558	0.526	0.000204549
Eif3g	1.28406e-08	0.273592	0.506	0.267	0.00021779
Fam63a	1.30633e-08	-0.345835	0.453	0.308	0.000221567
H2-K1	1.30999e-08	-0.54914	0.634	0.58	0.000222187
Derl1	1.37826e-08	-0.320509	0.541	0.39	0.000233766
1810009A15Rik	1.39302e-08	0.29247	0.355	0.149	0.00023627
Cd33	1.41622e-08	-0.889007	0.686	0.632	0.000240206
Stk17b	1.43125e-08	-0.776654	0.36	0.534	0.000242754
Osm	1.46648e-08	-1.38209	0.209	0.336	0.00024873
Rnpep	1.48829e-08	-0.4669	0.465	0.393	0.000252428
Actr3	1.51293e-08	-0.304326	0.983	0.864	0.000256609
Srsf5	1.61371e-08	-0.32727	0.901	0.749	0.000273702
Syce2	1.8286e-08	0.266886	0.227	0.073	0.000310148
Metrnl	1.9021e-08	-0.36156	0.012	0.139	0.000322616
Rabac1	1.91298e-08	-0.376497	0.401	0.297	0.00032446
Man2b1	1.91505e-08	-0.539733	0.872	0.783	0.000324811
P2ry6	1.97112e-08	-0.413372	0.012	0.142	0.000334321
Hbp1	1.97649e-08	-0.643545	0.407	0.355	0.000335232
4933434E20Rik	1.98958e-08	-0.253326	0.605	0.409	0.000337452
Ankrd54	2.05416e-08	0.257383	0.267	0.095	0.000348407
Sirpa	2.09614e-08	-0.662868	0.68	0.616	0.000355527
Cr1l	2.18047e-08	-0.339538	0.407	0.255	0.00036983
Gm9733	2.20478e-08	-0.694928	0.262	0.223	0.000373953
Nckap1l	2.41455e-08	-0.346496	0.622	0.487	0.000409532
H2-Ke2	2.49996e-08	0.252538	0.366	0.166	0.000424018
Adam15	2.63418e-08	-0.445417	0.43	0.385	0.000446783
Ssh2	2.78496e-08	-0.439238	0.453	0.543	0.000472356
Fbxl5	2.9936e-08	-0.811463	0.558	0.518	0.000507744
Sh2d3c	3.07481e-08	-0.76264	0.453	0.546	0.000521518
Arhgap9	3.13865e-08	-0.467998	0.692	0.553	0.000532346
Slc16a3	3.15287e-08	-0.574091	0.593	0.459	0.000534758
Shmt2	3.40848e-08	0.28346	0.326	0.135	0.000578112
Atp6ap1	3.51049e-08	-0.633384	0.57	0.504	0.000595415
Rad54l	3.64923e-08	0.291948	0.227	0.075	0.000618945
Actb	3.66678e-08	-0.26244	1	1	0.000621923
Nme1	3.67596e-08	0.294583	0.465	0.239	0.000623479
Myo1g	3.69217e-08	-0.734089	0.535	0.499	0.000626229
Erp29	3.72752e-08	-0.612848	0.5	0.432	0.000632224
Actg1	3.73725e-08	-0.497846	1	0.987	0.000633874
Irf7	3.74447e-08	-0.994417	0.116	0.295	0.0006351
Tsc22d3	3.89369e-08	-1.00646	0.401	0.409	0.000660408
Tmem106a	3.92743e-08	-0.316699	0.012	0.141	0.000666132
Evi2b	3.93456e-08	-0.422397	0.93	0.809	0.00066734
Sys1	4.01295e-08	-0.262488	0.395	0.26	0.000680637
Chp1	4.43863e-08	-0.406687	0.692	0.541	0.000752837
Rbm38	4.72974e-08	-0.427523	0.535	0.409	0.000802211
Fam32a	4.80957e-08	-0.632273	0.581	0.468	0.000815751
Zfp36l1	5.01072e-08	-0.442519	0.058	0.2	0.000849868
Cd177	5.1842e-08	0.335742	0.965	0.859	0.000879292
Rpl12	5.34512e-08	0.437125	0.459	0.239	0.000906585
Hpcal1	5.40475e-08	-0.67916	0.395	0.37	0.000916699
A630089N07Rik	5.50003e-08	-0.296274	0.983	0.971	0.000932861
Atf7ip	5.56074e-08	-0.279274	0.564	0.396	0.000943157
Clec4e	5.58711e-08	-0.822572	0.169	0.342	0.000947629
Dck	5.62276e-08	-0.344812	0.558	0.378	0.000953676
Tnfrsf1a	5.64952e-08	-0.404464	0.692	0.51	0.000958215
Eif4ebp1	5.90649e-08	-0.404005	0.512	0.375	0.0010018
AB124611	5.90803e-08	-0.692413	0.541	0.5	0.00100206
Il13ra1	5.94189e-08	-0.352298	0.012	0.13	0.0010078
Nudt4	6.64342e-08	-0.483889	0.483	0.343	0.00112679
Ankrd33b	6.70346e-08	-0.432289	0.017	0.145	0.00113697
Cd180	6.8035e-08	-0.274721	0.017	0.142	0.00115394
Csf2rb	6.92563e-08	-0.250875	0.738	0.566	0.00117466
A430005L14Rik	7.71148e-08	0.271487	0.297	0.115	0.00130794
Dhrs9	7.84476e-08	-0.392515	0.017	0.148	0.00133055
Arpc1b	8.21672e-08	-0.454293	1	0.965	0.00139364
Bcl2a1d	9.39688e-08	-0.684676	0.128	0.123	0.0015938
Sepp1	9.39787e-08	-1.09535	0.302	0.447	0.00159397
Il1f9	1.07326e-07	-1.35537	0.401	0.426	0.00182036
Sash3	1.10169e-07	-0.556443	0.593	0.475	0.00186858
Rbm42	1.12567e-07	-0.254118	0.512	0.355	0.00190924
R3hdm4	1.21186e-07	-0.519936	0.948	0.814	0.00205543
Slc6a6	1.25979e-07	-0.395878	0.32	0.432	0.00213673
Hck	1.3304e-07	-0.426424	0.709	0.551	0.00225649
Chsy1	1.34328e-07	-0.259239	0.465	0.347	0.00227834
Galnt9	1.41056e-07	-0.350173	0.006	0.111	0.00239245
Trpv2	1.4174e-07	-0.688347	0.134	0.292	0.00240405
Laptm4a	1.42306e-07	-0.44886	0.506	0.427	0.00241365
Add3	1.56372e-07	-0.297036	0.517	0.399	0.00265223
Ankrd44	1.61607e-07	-0.314213	0.634	0.497	0.00274102
Cd48	1.69375e-07	-0.77411	0.238	0.315	0.00287277
Ralb	1.90563e-07	-0.346687	0.605	0.492	0.00323214
Stat1	2.08103e-07	-0.250411	0.715	0.53	0.00352964
Mrpl40	2.08618e-07	0.259945	0.442	0.259	0.00353837
Adap2	2.11331e-07	-0.266595	0.041	0.184	0.00358439
Fuca1	2.16121e-07	-0.347568	0.581	0.458	0.00366562
Plin2	2.19449e-07	-0.729	0.547	0.516	0.00372208
Ifit3	2.24035e-07	-0.856768	0.006	0.114	0.00379987
Sp100	2.30042e-07	-0.313391	0.762	0.618	0.00390174
Tcf7l2	2.44539e-07	-0.35651	0.052	0.189	0.00414763
Rassf5	2.48253e-07	-0.740005	0.413	0.437	0.00421062
Ppp2r5a	2.48916e-07	-0.372595	0.535	0.445	0.00422186
Hdac4	2.55496e-07	-0.271988	0.331	0.228	0.00433346
Prkcd	2.6209e-07	-0.664252	0.634	0.6	0.00444532
Paip2	2.67444e-07	-0.310134	0.547	0.375	0.00453612
Stfa2l1	2.68888e-07	-1.02477	0.047	0.102	0.00456061
Lrrc33	2.94458e-07	-0.339647	0.651	0.492	0.0049943
Tmem50a	2.98637e-07	-0.289623	0.924	0.759	0.00506519
Rbm39	3.01837e-07	-0.292332	0.971	0.863	0.00511945
Scpep1	3.14012e-07	-0.479724	0.076	0.225	0.00532596
Bax	3.18801e-07	-0.30862	0.372	0.284	0.00540719
Txnip	3.20665e-07	-0.866338	0.238	0.33	0.00543879
Zfp36l2	3.27068e-07	-0.358819	0.419	0.475	0.0055474
Mcl1	3.34043e-07	-0.408599	0.36	0.386	0.0056657
Il16	3.36799e-07	-0.643581	0.645	0.629	0.00571244
Entpd1	3.40171e-07	-0.756238	0.36	0.361	0.00576964
Fgl2	3.49072e-07	-0.873612	0.36	0.32	0.00592061
Pqlc1	3.57873e-07	-0.537326	0.407	0.279	0.00606988
Cd74	3.60038e-07	-2.2497	0.052	0.188	0.00610661
Fam129a	3.65775e-07	-0.772124	0.291	0.452	0.00620391
Ptpn1	3.67082e-07	-0.581851	0.401	0.467	0.00622608
Ccl2	3.69087e-07	-0.546453	0.006	0.108	0.00626009
Csf3r	3.89502e-07	-1.29296	0.895	0.886	0.00660635
Hdc	3.97125e-07	-0.270169	0.738	0.525	0.00673564
Txndc5	3.97744e-07	-0.390323	0.052	0.159	0.00674614
Sidt2	4.11031e-07	-0.287916	0.61	0.529	0.00697149
Tspan13	4.37291e-07	-0.779019	0.064	0.195	0.00741689
Ifi30	4.46342e-07	-0.559324	0.07	0.229	0.0075704
Gsdmd	4.83052e-07	-0.399637	0.564	0.415	0.00819305
Ccrl2	6.33286e-07	-1.09577	0.105	0.234	0.0107412
Prdx4	6.64954e-07	-0.417927	0.041	0.159	0.0112783
Oasl2	6.97112e-07	-0.850818	0.11	0.227	0.0118237
Il1rn	7.14001e-07	-0.895795	0.14	0.257	0.0121102
2010016I18Rik	7.14371e-07	-0.442049	0.407	0.354	0.0121164
St8sia4	7.22602e-07	-0.331388	0.052	0.183	0.0122561
Rab4b	7.45188e-07	-0.358152	0.459	0.353	0.0126391
Srd5a3	7.94339e-07	-0.286809	0.349	0.228	0.0134728
Cd300e	7.96429e-07	-1.18923	0.017	0.11	0.0135082
Dusp22	8.04923e-07	-0.439087	0.233	0.357	0.0136523
Cdkn1b	8.11958e-07	-0.312127	0.75	0.696	0.0137716
Glipr2	8.45447e-07	-0.403678	0.587	0.448	0.0143396
Iscu	8.54299e-07	-0.250323	0.483	0.33	0.0144898
Calr	9.37855e-07	0.417105	0.465	0.263	0.015907
Ehd1	9.80986e-07	-0.310868	0.494	0.362	0.0166385
Asah1	1.00081e-06	-0.531303	0.349	0.343	0.0169748
2810474O19Rik	1.05906e-06	-0.406875	0.471	0.501	0.0179627
Rnf13	1.13134e-06	-0.706442	0.256	0.359	0.0191887
Cers6	1.13448e-06	-0.314758	0.558	0.47	0.0192419
Chmp5	1.17412e-06	-0.268332	0.43	0.292	0.0199142
Camk1	1.20458e-06	-0.910066	0.302	0.42	0.0204309
Csprs	1.33414e-06	-0.507488	0.407	0.363	0.0226283
Lipa	1.36758e-06	-0.627878	0.227	0.325	0.0231954
Tpst2	1.38284e-06	-0.269875	0.488	0.347	0.0234543
Inpp5d	1.39641e-06	-0.399566	0.576	0.545	0.0236846
Sema4d	1.40869e-06	-0.445348	0.128	0.265	0.0238928
Actr2	1.44545e-06	-0.250004	0.994	0.928	0.0245163
Haao	1.50845e-06	-0.350045	0.017	0.122	0.0255848
Lilrb4	1.53902e-06	-0.748099	0.674	0.702	0.0261032
Pnpla2	1.59114e-06	-0.254685	0.337	0.208	0.0269874
Dpysl2	1.59312e-06	-0.326071	0.267	0.32	0.0270208
Arhgap30	1.61785e-06	-0.499705	0.64	0.64	0.0274404
Ccl3	1.62163e-06	-0.698776	0.029	0.147	0.0275045
Gramd1a	1.74693e-06	-0.260481	0.302	0.189	0.0296296
Ip6k1	1.79567e-06	-0.5326	0.343	0.309	0.0304564
Pltp	2.14558e-06	-0.65473	0.012	0.101	0.0363912
Phgdh	2.14866e-06	0.31937	0.285	0.126	0.0364434
Itm2c	2.16145e-06	-0.566074	0.163	0.304	0.0366603
Fgfr1op2	2.16601e-06	-0.320473	0.517	0.413	0.0367378
Lrrc8d	2.16821e-06	-0.268165	0.413	0.316	0.036775
Soat1	2.20736e-06	-0.394361	0.738	0.666	0.0374391
Hcls1	2.28879e-06	-0.578995	0.738	0.662	0.0388202
Klra17	2.30223e-06	-0.561893	0.012	0.113	0.0390482
D1Ertd622e	2.35839e-06	-0.698635	0.366	0.425	0.0400006
Myh9	2.45498e-06	-0.282727	0.953	0.89	0.0416389
Rasa3	2.77181e-06	-0.607838	0.256	0.409	0.0470126
Stat3	2.86418e-06	-0.279539	0.68	0.52	0.0485793
Bst1	2.8825e-06	-0.467398	0.023	0.129	0.0488901
Cstb	3.06032e-06	-0.382284	0.337	0.288	0.0519061
Ube2b	3.11216e-06	-0.414708	0.552	0.466	0.0527854
Gm7609	3.12363e-06	-0.372775	0.674	0.621	0.0529799
Tmem147	3.14892e-06	0.259428	0.302	0.137	0.0534089
Csk	3.15458e-06	-0.510826	0.25	0.275	0.0535049
Cib1	3.33437e-06	-0.273937	0.366	0.242	0.0565542
Gltscr2	3.51922e-06	-0.359469	0.552	0.42	0.0596895
Dnm2	3.61131e-06	-0.283644	0.715	0.548	0.0612514
Lrrfip1	3.73106e-06	-0.377659	0.744	0.634	0.0632825
Abi1	3.76081e-06	-0.344949	0.5	0.421	0.0637871
Pfkfb4	3.85839e-06	-0.356214	0.529	0.366	0.0654421
Foxo3	3.92772e-06	-0.420123	0.267	0.291	0.0666181
Ifnar2	4.06251e-06	-0.524925	0.401	0.363	0.0689043
C1galt1c1	4.15194e-06	-0.545777	0.099	0.218	0.070421
Pgs1	4.33752e-06	-0.257279	0.436	0.292	0.0735687
Clec4d	4.52374e-06	-0.716944	0.029	0.135	0.0767272
Spop	4.57891e-06	-0.395206	0.622	0.496	0.0776629
Socs3	4.59442e-06	-0.646691	0.023	0.123	0.0779259
Stat6	4.70496e-06	-0.610718	0.5	0.507	0.0798009
Rnase4	4.72767e-06	-0.343295	0.023	0.124	0.080186
Slc9a3r2	4.888e-06	-0.470991	0.192	0.14	0.0829053
Pilra	5.00179e-06	-0.646767	0.75	0.727	0.0848353
Snap23	5.17505e-06	-0.775937	0.297	0.348	0.0877741
Map3k11	5.19842e-06	-0.299619	0.43	0.361	0.0881703
Dleu2	5.26054e-06	-0.491063	0.448	0.486	0.0892241
Hiat1	5.40076e-06	-0.459724	0.36	0.318	0.0916022
Arg2	5.56746e-06	-0.859246	0.029	0.122	0.0944297
Pttg1ip	5.64368e-06	-0.268125	0.36	0.232	0.0957225
Naaa	5.7159e-06	-0.342466	0.11	0.239	0.0969474
Sh3bp5	5.79502e-06	-0.472152	0.343	0.31	0.0982894
Ddx5	6.2063e-06	-0.564477	0.983	0.957	0.105265
Tuba1a	6.27739e-06	-0.54874	0.302	0.274	0.106471
Thbs1	6.38742e-06	-0.689572	0.11	0.234	0.108337
Fas	6.56026e-06	-0.862277	0.087	0.198	0.111268
Supt4a	7.16796e-06	-0.413941	0.436	0.33	0.121576
Rftn1	7.34129e-06	-0.382559	0.029	0.137	0.124516
Fam89b	7.92882e-06	-0.376605	0.32	0.273	0.134481
Stk38	8.0411e-06	-0.542494	0.541	0.532	0.136385
Snx1	8.14819e-06	-0.324009	0.419	0.321	0.138201
C920025E04Rik	8.16396e-06	-0.260055	0.5	0.467	0.138469
Dnajb9	8.21826e-06	-0.361303	0.326	0.236	0.13939
AI467606	8.26297e-06	-0.465856	0.471	0.352	0.140148
Mafb	8.60808e-06	-0.262437	0.041	0.146	0.146002
Tmem71	8.66854e-06	-0.544791	0.163	0.247	0.147027
Gcnt1	8.79825e-06	-0.254529	0.064	0.184	0.149227
Itgam	9.16949e-06	-0.408765	0.895	0.802	0.155524
Ogt	9.29744e-06	-0.349392	0.448	0.46	0.157694
Tmem173	9.88265e-06	-0.301876	0.087	0.187	0.16762
AF251705	1.02874e-05	-0.827837	0.099	0.19	0.174485
Acaa1a	1.04286e-05	-0.444997	0.355	0.284	0.176879
B430306N03Rik	1.08855e-05	-0.570242	0.558	0.648	0.184629
Ypel3	1.08856e-05	-0.700211	0.087	0.212	0.184631
Sqrdl	1.09507e-05	-0.272654	0.465	0.332	0.185736
9930111J21Rik1	1.18801e-05	-0.342414	0.622	0.521	0.201498
Tcp11l2	1.22503e-05	-0.531036	0.407	0.33	0.207778
Trim30a	1.34953e-05	-0.558776	0.314	0.432	0.228893
Ptk2b	1.46027e-05	-0.326563	0.488	0.396	0.247677
Niacr1	1.47635e-05	-1.07165	0.029	0.133	0.250404
Akna	1.49061e-05	-0.43256	0.744	0.69	0.252822
Gabarapl2	1.5697e-05	-0.343016	0.459	0.355	0.266236
Ehd4	1.57416e-05	-0.318736	0.291	0.303	0.266994
Tubb2a	1.68752e-05	-0.361673	0.052	0.135	0.28622
Fam105a	1.75238e-05	-0.389543	0.279	0.292	0.29722
Bcl2a1b	1.77944e-05	-0.541677	0.18	0.124	0.30181
Pisd-ps1	1.80406e-05	-0.284362	0.384	0.262	0.305987
Myd88	1.81952e-05	-0.54521	0.372	0.348	0.308609
Orai2	1.84127e-05	-0.262167	0.372	0.258	0.312298
Clk1	1.93993e-05	-0.548948	0.814	0.785	0.329031
Ubap1	1.97024e-05	-0.417079	0.279	0.195	0.334172
Eif2s3y	1.99153e-05	-0.291524	0.36	0.245	0.337783
Itfg3	2.21792e-05	-0.564067	0.099	0.204	0.376182
Frat1	2.41128e-05	-0.332471	0.39	0.304	0.408978
Sepw1	2.46519e-05	-0.40278	0.262	0.289	0.418121
Aif1	2.48593e-05	-0.427118	0.035	0.13	0.421639
Atg3	2.8379e-05	-0.402113	0.616	0.488	0.481336
Fgd2	2.98199e-05	-0.422253	0.064	0.17	0.505776
Gm13363	3.03866e-05	-0.405196	0.692	0.57	0.515386
Slc44a2	3.15503e-05	-0.638383	0.413	0.416	0.535124
Cndp2	3.15515e-05	-0.5705	0.267	0.289	0.535145
Mif	3.16504e-05	0.261222	0.349	0.19	0.536822
Rps27	3.16545e-05	-0.377465	0.198	0.179	0.536891
Cd300lf	3.21057e-05	-0.792572	0.657	0.648	0.544545
Gpcpd1	3.33776e-05	-0.541881	0.273	0.376	0.566117
H2-T23	3.39815e-05	-0.325004	0.971	0.933	0.576361
Sorl1	3.46916e-05	-0.306144	0.622	0.599	0.588405
Pithd1	3.49471e-05	-0.327854	0.244	0.151	0.592738
Fcgr4	3.55864e-05	-1.21319	0.105	0.186	0.603581
Ppp1r15a	3.57634e-05	-0.630716	0.093	0.189	0.606583
Mmp25	3.72628e-05	-0.451802	0.471	0.387	0.632014
Xdh	3.84056e-05	-0.399232	0.651	0.598	0.651397
Trp53inp2	3.86002e-05	-0.488776	0.547	0.485	0.654698
Tmem154	3.96246e-05	-0.511897	0.43	0.391	0.672073
Snx27	4.01956e-05	-0.261295	0.401	0.305	0.681758
Ifnar1	4.25291e-05	-0.278844	0.971	0.976	0.721336
Preb	4.36979e-05	-0.258467	0.366	0.32	0.741161
Ccm2	4.39223e-05	-0.425691	0.355	0.285	0.744966
Herpud1	4.46979e-05	-0.54841	0.517	0.441	0.758122
Cxcl2	4.88956e-05	-0.354046	0.029	0.12	0.829318
Elmo2	4.98428e-05	-0.43819	0.477	0.47	0.845383
Abhd15	5.07302e-05	-0.519543	0.122	0.223	0.860435
Atxn7l1	5.23527e-05	-0.275247	0.459	0.354	0.887954
Sh3bp2	5.2867e-05	-0.30616	0.308	0.255	0.896677
Ninj1	5.66361e-05	-0.982067	0.209	0.262	0.960605
Fcgrt	5.89902e-05	-0.527621	0.029	0.123	1
Tmem184b	5.97024e-05	-0.50591	0.203	0.278	1
Plod3	6.26338e-05	-0.421256	0.331	0.335	1
Trim30b	6.54916e-05	-0.362886	0.058	0.16	1
Pecam1	6.73373e-05	-0.294815	0.122	0.102	1
Pkn1	6.77859e-05	-0.281002	0.366	0.293	1
Gadd45g	6.88021e-05	-0.643757	0.25	0.222	1
Arhgap15	7.05138e-05	-0.346023	0.576	0.484	1
Arhgap25	7.11482e-05	-0.718959	0.32	0.318	1
Arhgef3	7.21229e-05	-0.567336	0.221	0.278	1
Snx5	7.30029e-05	-0.251667	0.36	0.279	1
Cyb5r1	7.32471e-05	-0.421537	0.326	0.271	1
Gcnt2	7.58844e-05	-0.471664	0.122	0.216	1
Cd101	7.85415e-05	-0.694925	0.041	0.133	1
Cd3d	7.97168e-05	-0.328777	0.401	0.296	1
Bid	7.99348e-05	-0.28815	0.366	0.258	1
Tgfbr2	8.38604e-05	-0.452459	0.122	0.228	1
Tmsb4x	8.55211e-05	-0.287395	1	0.989	1
Antxr2	9.05209e-05	-0.382646	0.145	0.213	1
Akt1	9.12118e-05	-0.325657	0.267	0.184	1
Stx11	9.17226e-05	-0.625654	0.314	0.314	1
Rin3	9.28644e-05	-0.289368	0.907	0.824	1
Rel	9.30147e-05	-0.385301	0.267	0.313	1
Fkbp1a	9.46858e-05	-0.331363	0.099	0.226	1
H2-Ab1	9.70585e-05	-2.55428	0.017	0.102	1
Apobr	9.95583e-05	-0.508731	0.349	0.36	1
Tor1aip1	0.00010074	-0.291173	0.36	0.361	1
Vmp1	0.000110476	-0.541392	0.349	0.414	1
Pdlim4	0.000114264	-0.517524	0.081	0.176	1
Arap1	0.000115112	-0.37742	0.488	0.517	1
BC100530	0.000121652	-0.843603	0.134	0.118	1
Phyh	0.000136536	-0.51124	0.395	0.309	1
S1pr5	0.000141442	-0.49871	0.041	0.126	1
Adrbk2	0.000147425	-0.310666	0.238	0.172	1
Nkiras2	0.000148749	-0.342258	0.267	0.238	1
BC005624	0.000152015	-0.250049	0.262	0.182	1
Rgs2	0.000153105	-0.380046	0.267	0.34	1
Fam103a1	0.00015933	-0.295625	0.355	0.274	1
Ubl3	0.000159911	-0.277404	0.308	0.296	1
Cd55	0.000162943	-0.372522	0.07	0.145	1
Fgd3	0.000169103	-0.262102	0.256	0.221	1
Ltb	0.000172069	-0.743792	0.145	0.201	1
Nptn	0.000177838	-0.259945	0.337	0.285	1
Trafd1	0.00019271	-0.457286	0.244	0.286	1
Ing4	0.000195108	-0.424256	0.209	0.207	1
Clec4b1	0.000216555	-0.508685	0.041	0.116	1
Nt5e	0.000218327	-0.334966	0.064	0.117	1
Fabp5	0.000225107	-0.395049	0.052	0.138	1
Lipe	0.000228711	-0.372244	0.227	0.197	1
Osgin1	0.000229329	-0.86004	0.116	0.193	1
Plekho2	0.000239035	-0.33749	0.448	0.376	1
Tnfrsf1b	0.000249268	-0.334733	0.285	0.254	1
Tbc1d14	0.000255028	-0.385988	0.047	0.129	1
Icam1	0.000275924	-0.299183	0.041	0.113	1
Cln3	0.000280193	-0.4363	0.256	0.287	1
Rap1b	0.000288594	-0.475315	0.453	0.442	1
Bmyc	0.000291292	-0.265966	0.029	0.111	1
Rasgrp4	0.00029659	-0.280463	0.36	0.396	1
Mir5109	0.000302517	0.524194	0.372	0.229	1
Hdac5	0.000313741	-0.250371	0.302	0.237	1
Cat	0.000342745	-0.309158	0.366	0.292	1
Cript	0.000345221	-0.319323	0.32	0.243	1
I830077J02Rik	0.000356286	-0.501155	0.198	0.251	1
Tspyl1	0.000365708	-0.398408	0.488	0.471	1
Zmynd11	0.000367376	-0.270361	0.244	0.207	1
Gpr35	0.000391899	-0.382689	0.442	0.437	1
H2-T24	0.000397034	-0.529848	0.5	0.516	1
Zbp1	0.000401431	-0.436156	0.058	0.159	1
Ikbkb	0.000402125	-0.378378	0.349	0.364	1
Rgs10	0.000404776	-0.359562	0.07	0.157	1
Osbpl9	0.000425156	-0.437379	0.494	0.441	1
Acta2	0.00044331	-0.562635	0.058	0.126	1
Cnn2	0.000448967	-0.267214	0.965	0.884	1
2019-03-07	0.000458664	-0.253443	0.273	0.196	1
Htatip2	0.000467633	-0.252366	0.238	0.174	1
Syf2	0.000471722	-0.439041	0.39	0.321	1
BC147527	0.000486266	-0.260798	0.488	0.463	1
Rtfdc1	0.000518961	-0.281437	0.448	0.333	1
Sgk1	0.0005596	-0.599396	0.128	0.227	1
Neurl3	0.000634973	-0.52393	0.826	0.807	1
Pion	0.000650367	-0.422203	0.128	0.23	1
Oas2	0.000666276	-0.393107	0.192	0.251	1
Dlgap4	0.000668738	-0.283006	0.186	0.229	1
Samsn1	0.000675473	-0.608909	0.459	0.446	1
Rgs14	0.000675866	-0.355135	0.413	0.327	1
Tmem123	0.000677201	-0.284141	0.384	0.273	1
Myl12b	0.000699873	-0.250716	1	0.971	1
Atg7	0.000712698	-0.342664	0.581	0.536	1
H3f3b	0.000715291	-0.341374	0.994	0.967	1
Cmtm3	0.000721721	-0.273333	0.099	0.193	1
Slc35a5	0.000744759	-0.292731	0.227	0.183	1
Aaed1	0.000754854	-0.459715	0.163	0.199	1
Sc4mol	0.000771748	-0.290426	0.244	0.2	1
Cyp4f16	0.000798781	-0.399405	0.221	0.268	1
Arrdc3	0.000807802	-0.364378	0.081	0.158	1
Clip1	0.000808663	-0.39245	0.256	0.265	1
Hmox1	0.000846837	-0.875989	0.105	0.211	1
Rhoa	0.000884896	-0.342392	0.994	0.951	1
Fgd4	0.000905682	-0.364989	0.506	0.449	1
Mir22hg	0.000925606	-0.410382	0.064	0.139	1
Tnfsf14	0.000940312	-0.63843	0.11	0.115	1
Hgsnat	0.00096894	-0.439384	0.157	0.192	1
Ipcef1	0.00104584	-0.273642	0.285	0.228	1
Rnf130	0.00106074	-0.291121	0.337	0.255	1
Oas3	0.00107374	-0.578617	0.75	0.784	1
Map4	0.00115778	-0.273258	0.384	0.364	1
Polr2e	0.00116006	-0.500372	0.198	0.207	1
Casp1	0.00123362	-0.297124	0.151	0.155	1
Plcg2	0.00130824	-0.403722	0.512	0.487	1
Irf1	0.00131232	-0.270837	0.262	0.183	1
Gp49a	0.00133796	-0.451903	0.453	0.493	1
Abtb2	0.00135136	-0.274002	0.047	0.109	1
Hhex	0.00136204	-0.377129	0.273	0.272	1
Prg2	0.00139522	-3.81153	0.157	0.112	1
Snrk	0.00154037	-0.340172	0.262	0.267	1
Nedd9	0.00157754	-0.386086	0.459	0.427	1
Tlr2	0.00167572	-0.467055	0.081	0.16	1
Mknk1	0.00168543	-0.294966	0.39	0.307	1
Rnasel	0.0017182	-0.276549	0.407	0.423	1
Slc7a7	0.00173807	-0.348355	0.209	0.237	1
Mbp	0.00173833	-0.382728	0.308	0.315	1
Mvp	0.00173999	-0.417466	0.163	0.223	1
Necap2	0.00174592	-0.345094	0.337	0.305	1
Bloc1s2a	0.00192108	-0.269216	0.256	0.199	1
Milr1	0.00196629	-0.402187	0.523	0.474	1
Acot7	0.00197825	-0.318714	0.221	0.188	1
Gpr141	0.00211528	-0.375803	0.314	0.37	1
Rbm7	0.00213413	-0.42599	0.366	0.363	1
Lsm7	0.00221281	0.321675	0.209	0.109	1
Rhof	0.00231498	-0.354979	0.087	0.109	1
Map2k1	0.00232879	-0.419065	0.36	0.332	1
Fpr2	0.0023421	-0.403092	0.203	0.208	1
Ngly1	0.0023432	-0.337721	0.198	0.166	1
Slc25a4	0.00235805	-0.322886	0.169	0.216	1
Ptafr	0.00248865	-0.428036	0.233	0.191	1
Cyb5	0.00250498	-0.390164	0.343	0.303	1
Sesn2	0.00251395	-0.273603	0.035	0.107	1
Usp3	0.00256772	-0.310367	0.25	0.276	1
Tmem176b	0.00257458	-0.615604	0.041	0.117	1
Pqlc3	0.00257709	-0.530767	0.238	0.314	1
Nme2	0.0026269	-0.28534	0.297	0.28	1
Pik3cd	0.00272206	-0.306205	0.337	0.355	1
Il10rb	0.00275803	-0.455229	0.384	0.326	1
Ndel1	0.00277061	-0.514307	0.459	0.416	1
H2-DMb1	0.00283805	-0.434032	0.233	0.222	1
Trim26	0.00303101	-0.260869	0.047	0.11	1
Ehbp1l1	0.00313406	-0.300538	0.919	0.846	1
Prpsap1	0.00316658	-0.284265	0.227	0.199	1
Tprgl	0.00318421	-0.277465	0.14	0.103	1
Por	0.00319091	-0.547542	0.192	0.211	1
Ddx60	0.00324638	-0.293697	0.18	0.197	1
Anxa4	0.00331877	-0.283852	0.076	0.15	1
Itprip	0.00334617	-0.285649	0.378	0.279	1
St3gal5	0.00335046	-0.399369	0.273	0.26	1
Dhrs1	0.0034612	-0.427705	0.215	0.229	1
St3gal4	0.00359443	-0.3598	0.256	0.227	1
Mta3	0.0036024	-0.30296	0.07	0.145	1
Dennd1c	0.00364337	-0.414504	0.308	0.37	1
2010002M12Rik	0.0038215	-0.262822	0.198	0.178	1
Usf1	0.00415073	-0.327392	0.157	0.173	1
Apoe	0.00420374	-1.4848	0.087	0.141	1
Leprot	0.00438255	-0.313979	0.256	0.223	1
Rhbdf2	0.00450987	-0.33624	0.145	0.176	1
Sgpl1	0.00461421	-0.318689	0.343	0.295	1
Oas1a	0.00493763	-0.380465	0.291	0.276	1
Cdc42se2	0.00505006	-0.416377	0.36	0.349	1
Hspa1b	0.00537229	-0.280893	0.151	0.113	1
Vamp3	0.00552828	-0.302437	0.541	0.429	1
Birc3	0.00585892	-0.307984	0.11	0.197	1
Isg15	0.00610768	-0.446117	0.099	0.121	1
Golm1	0.0063376	-0.279951	0.052	0.123	1
Tnfaip8l2	0.00649209	-0.441965	0.209	0.209	1
Agpat4	0.00668657	-0.271404	0.093	0.141	1
Ly96	0.00698231	-0.352351	0.093	0.153	1
Hmgcl	0.00815286	-0.353506	0.314	0.248	1
Gpr65	0.00824014	-0.277041	0.087	0.165	1
Mettl7a1	0.00970529	-0.288927	0.163	0.208	1
Idh1	0.00991977	-0.330952	0.308	0.286	1
Rchy1	0.0102084	-0.339879	0.523	0.47	1
Bst2	0.0112003	-0.34923	0.116	0.17	1
Cmpk2	0.011222	-0.533609	0.18	0.21	1
Mov10	0.0112274	-0.345539	0.087	0.14	1
Tmco6	0.0113807	-0.26971	0.157	0.122	1
Rit1	0.0119601	-0.34206	0.215	0.214	1
Acvrl1	0.0133287	-0.271115	0.093	0.157	1
3110002H16Rik	0.0143845	-0.271045	0.227	0.183	1
Gm1821	0.0163581	-0.279927	1	0.997	1
Inpp5k	0.018464	-0.29378	0.262	0.226	1
Creb3	0.0197006	-0.366286	0.163	0.172	1
Ndrg1	0.0210996	-0.341845	0.093	0.151	1
Fam114a2	0.0222914	-0.254688	0.18	0.164	1
Bcl10	0.0226735	-0.540454	0.302	0.318	1
Jun	0.0228365	-0.340721	0.558	0.498	1
Smox	0.0230944	-0.403505	0.081	0.137	1
Ddit3	0.023351	-0.383383	0.07	0.136	1
Slc25a45	0.0247021	-0.398127	0.227	0.245	1
Pold4	0.0252554	-0.299767	0.227	0.213	1
Pmaip1	0.0259013	-0.431882	0.186	0.192	1
Gm8615	0.0262048	-0.284684	0.215	0.212	1
Relt	0.0269318	-0.384426	0.221	0.248	1
Mapk14	0.0286891	-0.329539	0.256	0.242	1
Ifitm6	0.0295069	-0.546011	0.645	0.687	1
Tfeb	0.0304071	-0.321626	0.093	0.123	1
Hfe	0.0308435	-0.387061	0.151	0.13	1
Stx7	0.0313364	-0.303973	0.407	0.37	1
Dcaf11	0.0313539	-0.314077	0.18	0.174	1
Nlrp12	0.0321538	-0.319084	0.087	0.108	1
Pik3r5	0.0348989	-0.270358	0.424	0.452	1
Tmem120a	0.034959	-0.409122	0.128	0.165	1
Gucd1	0.0351616	-0.298731	0.198	0.17	1
Ppt1	0.0411875	-0.465013	0.727	0.668	1
Lgals3bp	0.0444273	-0.319601	0.151	0.157	1
Nuak2	0.0478724	-0.335295	0.174	0.191	1
Irak2	0.0498289	-0.253661	0.314	0.404	1
Itm2b	0.05688	-0.311945	0.994	0.983	1
Vps11	0.0613525	-0.257	0.18	0.154	1
Naga	0.0634101	-0.347092	0.256	0.26	1
Il1r2	0.0634274	-0.728403	0.163	0.197	1
Fcrl1	0.0650616	-0.292833	0.058	0.101	1
Pstpip2	0.0670346	-0.378611	0.326	0.352	1
N4bp2l1	0.0750629	-0.332352	0.174	0.171	1
Stxbp3a	0.0751339	-0.252754	0.134	0.145	1
Irf9	0.0776189	-0.380802	0.39	0.428	1
Ear3	0.0814739	-0.387937	0.093	0.115	1
Ear12	0.083917	-0.419839	0.093	0.115	1
Mfsd5	0.0873519	-0.257091	0.215	0.2	1
Nfil3	0.103136	-0.264644	0.122	0.171	1
Chmp2b	0.11634	-0.29703	0.198	0.2	1
Orai3	0.127164	-0.303047	0.18	0.165	1
Irgm1	0.130563	-0.302596	0.314	0.332	1
Ifrd1	0.150893	-0.324629	0.244	0.236	1
Abhd12	0.174947	-0.298356	0.18	0.2	1
Klf10	0.191554	-0.289573	0.25	0.28	1
Olfm4	0.201348	-0.416469	0.267	0.205	1
Herc4	0.214089	-0.26951	0.267	0.31	1
C130050O18Rik	0.272927	-0.255937	0.157	0.153	1
Pisd	0.299718	-0.259342	0.227	0.23	1
Hspa1a	0.319691	-0.453902	0.163	0.157	1

## Sheet: C4 FindMarkers
Supplementary Table 5I: FindMarkers output for C4
ID	p_val	avg_logFC	pct.1	pct.2	p_val_adj
Ace	4.32813e-101	1.80361	0.958	0.048	7.34094e-97
Cd300e	2.75536e-100	3.07417	0.792	0.028	4.67337e-96
Nr4a1	3.68832e-86	2.56618	0.99	0.289	6.25577e-82
Emr4	1.8444e-82	2.3731	0.927	0.146	3.12829e-78
Abi3	3.33192e-82	1.66087	0.906	0.114	5.65127e-78
Cst3	5.03722e-82	2.16279	1	0.833	8.54364e-78
Treml4	9.82675e-82	2.72412	0.865	0.111	1.66672e-77
Gm11710	2.92673e-77	1.40044	0.938	0.126	4.96402e-73
Gm11711	2.92673e-77	1.40044	0.938	0.126	4.96402e-73
Clec4a3	8.0343e-76	2.4504	0.948	0.217	1.3627e-71
Gngt2	6.14983e-72	2.24483	0.833	0.083	1.04307e-67
Cd244	1.33462e-71	1.83675	0.885	0.124	2.26365e-67
Trf	8.55009e-71	2.41035	0.938	0.394	1.45018e-66
Hp	1.03342e-70	-2.22326	0.531	0.938	1.75279e-66
Cd300ld	2.81542e-70	2.11659	0.865	0.15	4.77523e-66
Eno3	1.59907e-69	2.54951	0.667	0.028	2.71219e-65
Cd300lh	9.75469e-69	1.49582	0.844	0.068	1.65449e-64
S1pr5	4.08937e-65	1.91834	0.698	0.056	6.93598e-61
Cd36	2.09893e-63	1.63678	0.646	0.015	3.56e-59
Ctsb	2.23632e-62	1.54006	0.958	0.728	3.79302e-58
Cx3cr1	9.69908e-62	1.9649	0.833	0.342	1.64506e-57
Pot1b	2.05893e-61	0.769971	0.938	0.745	3.49216e-57
Csf1r	7.91987e-58	2.02507	0.917	0.434	1.34329e-53
Clec4a1	5.38697e-55	1.9155	0.802	0.223	9.13683e-51
Gm2a	4.72974e-54	1.35005	1	0.643	8.02211e-50
Adrbk2	1.92958e-53	1.55692	0.708	0.132	3.27275e-49
Tcf7l2	3.11189e-53	1.10463	0.802	0.106	5.27808e-49
Bcl2a1d	4.54622e-51	2.06782	0.635	0.074	7.71084e-47
Fcgr4	6.69483e-50	2.42797	0.688	0.123	1.13551e-45
S100a9	1.22564e-49	-4.1465	0.531	0.856	2.0788e-45
B2m	3.22554e-49	1.22895	1	0.936	5.47083e-45
Cd72	3.93382e-49	2.13216	0.562	0.03	6.67215e-45
Stk10	5.11375e-48	1.4454	0.958	0.602	8.67343e-44
Hmgn2	7.28647e-48	-2.4255	0.688	0.929	1.23586e-43
S100a8	1.2934e-47	-3.79408	0.552	0.884	2.19374e-43
Sell	3.01105e-44	-2.43217	0.396	0.855	5.10705e-40
Lilra5	3.51604e-44	1.61678	0.448	0.012	5.96355e-40
Arhgef10l	7.07591e-44	1.37546	0.677	0.164	1.20015e-39
Pltp	8.43152e-44	1.90809	0.562	0.041	1.43007e-39
Pld4	1.03899e-43	1.61669	0.948	0.353	1.76223e-39
Myo1g	1.22007e-43	1.68939	0.896	0.467	2.06936e-39
Ly6a	5.01196e-43	-0.717022	0.031	0.723	8.50078e-39
Ly6i	9.5797e-43	-0.340809	0.021	0.672	1.62481e-38
Glrx	1.42648e-42	-2.09173	0.302	0.833	2.41946e-38
S100a11	1.32198e-41	-1.90423	0.292	0.883	2.2422e-37
Pparg	2.09054e-41	1.75975	0.479	0.017	3.54577e-37
Cd24a	2.17397e-41	-2.40762	0.271	0.774	3.68727e-37
Gm15987	4.87874e-41	0.981093	0.656	0.117	8.27482e-37
Anxa1	5.39467e-41	-2.66197	0.562	0.917	9.1499e-37
Ctss	3.31503e-40	1.61387	0.938	0.384	5.62263e-36
Chi3l1	8.88353e-40	-2.03679	0.406	0.838	1.50674e-35
Tnfrsf1b	1.83285e-39	1.30597	0.708	0.216	3.10869e-35
Itgal	2.99459e-39	1.25666	0.917	0.583	5.07912e-35
Ptp4a2	5.36792e-39	1.14256	1	0.846	9.10454e-35
Tmem26	1.59723e-38	0.863634	0.448	0.016	2.70906e-34
Cd68	2.9008e-38	1.77103	0.802	0.341	4.92005e-34
Ly6c1	8.10246e-38	-1.57349	0.115	0.748	1.37426e-33
Dusp16	8.54382e-38	0.79784	0.51	0.031	1.44912e-33
Tmem51	9.60308e-38	1.76759	0.531	0.106	1.62878e-33
Laptm5	1.3329e-37	1.10688	1	0.933	2.26074e-33
Ly6f	1.42898e-36	-0.45913	0.01	0.631	2.42369e-32
Ifngr1	1.77821e-36	1.54017	0.979	0.615	3.01602e-32
Susd3	4.26688e-36	1.84151	0.729	0.223	7.23706e-32
4930511M06Rik	7.27719e-36	0.34278	1	0.98	1.23428e-31
Lrp1	3.37109e-35	0.604843	0.677	0.194	5.71771e-31
Pou2f2	5.07509e-35	0.778186	0.542	0.077	8.60786e-31
Klf13	1.62292e-34	0.804768	0.969	0.835	2.75264e-30
Acp5	3.25525e-34	1.74893	0.552	0.169	5.52123e-30
Pik3ap1	5.11714e-34	1.27215	0.625	0.165	8.67918e-30
Fyb	7.02132e-33	1.17435	0.917	0.498	1.19089e-28
9030619P08Rik	9.23407e-33	-0.477318	0.031	0.62	1.56619e-28
Zfp36l1	1.15661e-32	0.994487	0.656	0.132	1.96173e-28
Gpr35	1.78873e-31	1.15171	0.646	0.418	3.03386e-27
Mrgpra2b	5.53039e-31	-2.34102	0.094	0.644	9.38009e-27
Itga4	5.53964e-31	0.66041	0.875	0.657	9.39579e-27
Ly6e	1.0317e-30	1.12857	0.99	0.865	1.74986e-26
Ear2	1.21816e-30	0.436423	0.948	0.492	2.06612e-26
Ly6c2	1.81969e-30	-1.95149	0.208	0.758	3.08638e-26
Apoe	1.90535e-30	2.66161	0.49	0.098	3.23167e-26
Ppm1h	2.09596e-30	0.780911	0.708	0.424	3.55496e-26
Fcer1g	4.848e-30	0.957509	1	0.942	8.22269e-26
Map3k1	6.86472e-30	0.746921	0.906	0.557	1.16432e-25
Prdx5	7.05071e-30	-1.16523	0.552	0.911	1.19587e-25
Lrg1	1.56977e-29	-2.7902	0.24	0.621	2.66249e-25
Lcn2	2.05065e-29	-3.28618	0.219	0.671	3.4781e-25
Nupr1	2.81063e-29	1.57161	0.469	0.123	4.7671e-25
1100001G20Rik	3.04054e-29	-2.39524	0.115	0.55	5.15706e-25
Mxd1	1.03505e-28	-1.90613	0.292	0.735	1.75556e-24
Ear1	1.05182e-28	0.37235	0.948	0.487	1.78398e-24
Ctsa	1.33674e-28	1.26974	0.885	0.531	2.26724e-24
Itgax	1.65602e-28	1.03316	0.438	0.033	2.80877e-24
Mrgpra2a	1.74674e-28	-1.39909	0.167	0.672	2.96265e-24
Anxa3	2.27033e-28	-1.65492	0.167	0.629	3.85071e-24
Ifitm2	4.60569e-28	1.02348	0.979	0.784	7.81172e-24
A130077B15Rik	6.25589e-28	0.554011	1	0.997	1.06106e-23
Ltb4r1	7.95722e-28	-1.85108	0.167	0.574	1.34962e-23
Havcr2	1.00098e-27	1.12758	0.365	0.045	1.69776e-23
Hfe	1.26268e-27	1.59305	0.5	0.098	2.14163e-23
Msn	1.9046e-27	1.0629	0.958	0.809	3.23039e-23
Fam49a	2.61934e-27	1.05289	0.583	0.143	4.44266e-23
Spata13	3.27171e-27	0.794761	0.677	0.267	5.54914e-23
Cytip	3.6042e-27	1.03639	0.771	0.397	6.11309e-23
Smc6	3.14211e-26	0.714113	0.625	0.3	5.32933e-22
Sat1	4.17539e-26	1.04531	1	0.932	7.08187e-22
Mmp9	5.30695e-26	-2.43993	0.229	0.614	9.00112e-22
Ptprc	5.72174e-26	0.967103	0.99	0.937	9.70465e-22
Adpgk	7.7636e-26	-1.909	0.26	0.679	1.31678e-21
[truncated: 1,978 more rows]

## Sheet: C5 FindMarkers
Supplementary Table 5J: FindMarkers output for C5
[truncated: 1,803 more rows]
