# Supplementary material for: Performativity and National Identity: Japan’s Domestic Policies
Source: Oxford University Press journal article supplement (doi:10.1158/2159-8290.cd-18-1393), 2007-01-01
Supplement: 21598290cd181393-sup-212867_2_supp_5481627_pq6jqy.xlsx [file 21598290cd181393-sup-212867_2_supp_5481627_pq6jqy.xlsx]

## Sheet: C2 vs C0,1,3,5
Supplementary Table 6a: Ingenuity Pathway Analysis of Cluster 2 Macrophages Compared to Cluster 0, 1 and 3 Macrophages
Ingenuity Canonical Pathways	-log(p-value)	Ratio	z-score	Molecules
EIF2 Signaling	49.6	0.467	5.88	RAP2B,RAF1,EIF3C,RPL39,RPLP2,RPL35A,EIF2A,RPS11,RPS2,EIF1AY,PABPC1,RAP1A,RPL10A,RPS6,PTBP1,PPP1R15A,RPL10,RPL6,RPS25,RPL41,EIF3K,RPL24,Rpl36a,RPS18,Rpl22l1,RPL26,EIF2B2,RPL7,EIF4E,RPL35,RPS9,EIF3A,RPS12,RPS5,RPL31,RPL18,RPS24,RPS19,RPL4,EIF3H,RPL17,RPS10,EIF3G,RPS16,EIF4A1,EIF2B1,RPS27A,RPL37,EIF1AX,RPS14,RPL11,RPL22,RPS23,HSPA5,RPS7,MYC,RPL13,RPS20,EIF3D,RPS13,RPL21,RPL19,PPP1CA,ATF3,RPL36AL,RPL…
Oxidative Phosphorylation	37.6	0.587	8	NDUFA9,ATP5F1D,NDUFB5,COX8A,ATP5MG,NDUFB8,NDUFA1,NDUFB3,NDUFB10,NDUFA5,NDUFS6,UQCRFS1,NDUFA10,ATP5PB,ATP5MC3,ATP5PF,ATP5MC2,NDUFS7,ATP5F1A,SURF1,ATP5PO,UQCR11,SDHC,ATP5F1C,NDUFB11,ATP5F1B,NDUFA6,UQCRC2,NDUFA12,NDUFS3,NDUFB2,NDUFA4,COX7B,SDHB,ATP5MC1,ATP5PD,Cox6c,COX6A1,NDUFA2,Atp5e,NDUFB9,ATP5MF,NDUFS2,NDUFB6,NDUFAB1,COX4I1,SDHA,NDUFV1,COX6B1,NDUFB4,COX7A2L,NDUFA13,UQCRB,NDUFV2,NDUFS8,UQCR10,CYC1…
Mitochondrial Dysfunction	36.2	0.462	NaN	NDUFA9,ATP5F1D,NDUFB5,COX8A,ACO2,ATP5MG,NDUFB8,NDUFA1,NDUFB3,NDUFB10,VDAC2,PDHA1,NDUFA5,NDUFS6,NDUFA10,UQCRFS1,ATP5PB,ATP5MC3,ATP5PF,ATP5MC2,NDUFS7,ATP5F1A,ATP5PO,SURF1,UQCR11,SDHC,ATP5F1C,PRDX3,NDUFB11,ATP5F1B,NDUFA6,APH1A,TXN2,UQCRC2,NDUFA12,NDUFS3,VDAC1,NDUFB2,HSD17B10,NDUFA4,ATP5MC1,SDHB,COX7B,ATP5PD,Cox6c,COX6A1,PRDX5,NDUFA2,Atp5e,NDUFB9,PARK7,ATP5MF,NDUFB6,NDUFS2,OGDH,CASP8,NDUFAB1,COX4I1,S…
Sirtuin Signaling Pathway	23.9	0.301	-3.538	TUBA1B,POLR2F,TIMM13,NDUFA9,ATP5F1D,NDUFB5,TIMM50,ARG2,NDUFB8,NDUFA1,NDUFB3,VDAC2,NDUFB10,MYC,PDHA1,NDUFA5,XPC,NDUFS6,NDUFA10,UQCRFS1,ATP5PB,APEX1,TP53,PGK1,ATP5PF,TIMM44,NDUFS7,ATP5F1A,SDHC,NFKB2,TIMM17A,ATP5F1C,ACADL,NDUFB11,H3F3A/H3F3B,ATP5F1B,NDUFA6,TOMM34,UQCRC2,NDUFA12,IDH2,H1F0,NDUFS3,VDAC1,NDUFB2,TOMM40,NDUFA4,HIST1H1C,SDHB,ATP5MC1,NFKB1,NDUFA2,NDUFB9,JUN,GADD45A,TUBA8,NDUFB6,NDUFS2,MAP1L…
Regulation of eIF4 and p70S6K Signaling	21.8	0.37	1.134	RAP2B,RAF1,EIF3C,RPS23,MAPK13,RPS11,EIF2A,RPS7,RPS20,EIF3D,RPS13,RPS2,EIF1AY,PABPC1,RPS8,EIF2S3,EIF3E,RAP1A,EIF2S2,EIF3M,RPS6,EIF4A3,RPS15A,RPS25,RPSA,EIF3K,RPS18,EIF2S1,EIF2B2,EIF4E,RPS28,RPS9,EIF3A,RPS17,RPS3,RPS5,RPS12,MAP2K1,RPS24,ITGB1,RPS19,EIF3H,PPP2R5D,RPS10,RPS21,RPS29,FAU,EIF3G,RPS4Y1,RPS15,EIF3F,RPS16,RPS26,EIF4A1,RPS27L,EIF2B1,EIF3I,RPS27A,EIF3L,EIF1AX,RPS14
Protein Ubiquitination Pathway	18.6	0.28	NaN	FZR1,HSPA14,UBE2A,USP5,PSMA7,HSPA1A/HSPA1B,TRAP1,DNAJC3,PSMB8,DNAJC15,HSPA5,SKP1,PSMC5,HSPA4,UBE2B,PSMA2,PSMC2,PSMA6,PSMB5,DNAJC9,DNAJC19,HSPA9,PSME2,PSMD5,PSMC4,PSMD6,PSMD3,HSPA8,PSMD11,PSMB7,UBE2L3,PSMB2,PSMA5,PSMD12,PSMB1,PSMA4,ANAPC5,HSP90AA1,PSMD1,PSMD4,UBE2E1,UBE2I,UBE2C,B2M,PSMB3,CDC20,PSMD7,PSMB10,HLA-A,UBE2N,CUL1,UBE2F,HSP90B1,HSP90AB1,STUB1,PSMC6,UBE2V1,HSPE1,PSMA3,PSMD14,PSMB4,PSMB9,PS…
mTOR Signaling	13.7	0.274	2.138	RAP2B,EIF3C,RPS23,RPS11,RPS7,RHOG,RPS20,EIF3D,RPS13,RPS2,EIF4B,RHEB,RPS8,EIF3E,MLST8,RAP1A,EIF3M,RPS6,RND3,EIF4A3,PRKCD,RPS25,RPS15A,RPSA,EIF3K,RPS18,FKBP1A,EIF4E,RPS28,RPS9,EIF3A,RPS17,RPS3,RPS5,RPS12,RPS24,RPS19,EIF3H,PPP2R5D,RPS10,RPS21,RPS29,FAU,EIF3G,PLD4,EIF3F,RPS15,RPS4Y1,RPS16,RPS26,EIF4A1,RPS27L,EIF3I,RPS27A,RPS6KA4,EIF3L,RPS14
Phagosome Maturation	11.4	0.291	NaN	B2M,TUBA1B,ATP6V0B,PRDX1,ATP6V1C1,HLA-A,PRDX5,TCIRG1,RAB5B,TUBB,DYNLT1,CTSZ,CTSV,NSF,CTSD,TUBA8,CTSH,CTSS,CYBB,LAMP1,NAPA,M6PR,CALR,VPS16,VPS41,TUBB4B,TUBG1,TUBB2A,VPS33A,CANX,ATP6V1A,GPAA1,LAMP2,CTSA,TUBA1A,ATP6V1H,TUBB6,CTSB,GOSR2,CTSC,ATP6V1B2,HLA-DRB5,PRDX2
Unfolded protein response	8.89	0.393	NaN	CALR,P4HB,HSPA14,INSIG1,Hspa1b,HSPA9,HSPA1A/HSPA1B,XBP1,CEBPD,CANX,DNAJC3,HSPA5,EIF2A,CEBPE,HSPA8,HSPA4,HSP90B1,PDIA6,PPP1R15A,VCP,CD82,DNAJA2
TCA Cycle II (Eukaryotic)	8.64	0.583	3.742	SDHA,SDHB,IDH3G,ACO2,SDHC,MDH1,SUCLA2,CS,SUCLG1,SDHD,IDH3A,OGDH,FH,IDH3B
Antigen Presentation Pathway	8.03	0.447	NaN	B2M,PSMB9,CALR,PSMB5,PDIA3,HLA-A,HLA-DQA1,CANX,PSMB8,HLA-DQB1,CD74,PSMB6,HLA-G,HLA-DMA,HLA-DMB,HLA-E,HLA-DRB5
Sumoylation Pathway	7.1	0.281	-0.626	GDI1,SUMO3,RAN,NFKB1,UBA2,FAS,RHOG,JUN,SAE1,STUB1,SUMO1,RANGAP1,TP53,SERBP1,HDAC1,GDI2,RPA1,NFKB2,RFC5,ARHGDIB,RNF4,PCNA,RND3,SUMO2,ARHGDIA,RFC3,UBE2I
NER Pathway	6.99	0.272	1.877	POLR2F,POLR2D,UBE2N,HMGN1,POLR2J,POLD4,HIST1H4A,POLR2C,COPS6,NEDD8,XPC,TOP2A,POLR2I,COPS5,COPS7A,DNA2,POLR2H,RPA1,RFC5,DDB1,PCNA,ERCC1,H3F3A/H3F3B,POLR2E,GPS1,POLD2,UBE2I,RFC3
Cell Cycle: G2/M DNA Damage Checkpoint Regulation	6.1	0.347	-1.069	TP53,YWHAG,YWHAH,YWHAE,YWHAB,CUL1,CCNB2,PLK1,AURKA,SKP1,CCNB1,YWHAQ,GADD45A,CDKN1A,TOP2A,CKS1B,FBXL5
Huntington's Disease Signaling	5.71	0.187	-1.387	POLR2F,SDHB,ATP5MC1,POLR2D,HSPA14,ATP5F1D,Hspa1b,HSPA1A/HSPA1B,POLR2J,HSPA5,AP2A2,HSPA4,CASP6,NSF,CTSD,POLR2C,JUN,CASP1,TCERG1,CASP8,NAPA,ATP5PB,ATP5PF,TP53,SDHA,POLR2I,ATP5F1A,HDAC1,HSPA9,PSME2,POLR2H,BAX,GPAA1,GNG10,HSPA8,ATP5F1C,PSME1,HDAC3,ATP5F1B,POLR2E,CAPN1,PRKCD,CLTA,RPS27A,CYCS,CAPN2,GOSR2
NRF2-mediated Oxidative Stress Response	5.62	0.198	2.711	RAP2B,RAF1,GSTM5,PRDX1,PPIB,DNAJC3,DNAJC15,CLPP,MAFG,AKR1A1,JUN,SCARB1,KEAP1,VCP,PMF1/PMF1-BGLAP,DNAJA3,DNAJA2,TXN,MAP2K1,MGST1,DNAJC9,MAP3K1,DNAJC19,SOD1,JUNB,RAP1A,GSTO1,DNAJC11,FTL,ERP29,MGST2,STIP1,PRKCD,DNAJB11,CAT,CCT7,ACTG1,GSTP1,MGST3,DNAJC7
Type I Diabetes Mellitus Signaling	5.21	0.234	1	HLA-A,SOCS6,HLA-DQA1,MAPK13,HLA-DQB1,NFKB1,FAS,HLA-G,TRADD,IKBKB,HLA-DMA,HLA-DMB,BID,CASP8,NFKBIB,TNFRSF1B,ICA1,TNFRSF1A,IFNGR1,HSPD1,NFKB2,CD3D,IL1B,CYCS,HLA-E,HLA-DRB5
Aryl Hydrocarbon Receptor Signaling	4.95	0.211	0	GSTM5,CDK4,NFKB1,PTGES3,FAS,MYC,CTSD,ALDH2,CCNA2,HSP90B1,JUN,HSP90AB1,CCND3,RARA,NEDD8,TP53,ALDH1B1,MGST1,BAX,NFKB2,GSTO1,ALDH9A1,MGST2,CDKN1A,IL1B,HSP90AA1,ALDH3B1,MGST3,GSTP1,MCM7
Fatty Acid Î²-oxidation I	4.88	0.375	2.309	HSD17B10,ECHS1,ACAA1,ACSL5,HADHB,HSD17B4,ECI1,ACAA2,ACSL1,HADHA,HADH,SLC27A4
Iron homeostasis signaling pathway	4.82	0.212	NaN	ATP6V0B,PCBP1,ATP6V1C1,TCIRG1,ACO2,CUL1,SKP1,CIAO2A,MCOLN1,SLC40A1,FBXL5,CIAO2B,NFS1,NUBP1,HSPA9,IL6R,TYK2,ATP6V1A,LYRM4,HMOX2,FTL,HP,TF,ATP6V1H,NUBP2,HFE,SLC11A1,STEAP3,ATP6V1B2
Induction of Apoptosis by HIV1	4.65	0.279	2.183	TP53,SLC25A4,CXCR4,TNFRSF1A,SLC25A3,BAX,NFKB2,NFKB1,FAS,TRADD,IKBKB,BID,CYCS,TNFRSF1B,SLC25A5,NFKBIB,CASP8
tRNA Charging	4.59	0.333	3.606	GARS,Qars,CARS2,TARS,FARSB,FARSA,NARS,WARS,TARS2,RARS,KARS,VARS,SARS
Inflammasome pathway	4.53	0.45	1.667	NLRP3,PYCARD,CTSB,CASP1,IL1B,NFKB2,NFKB1,CASP8,P2RX7
Glutaryl-CoA Degradation	4.49	0.5	2.828	HSD17B10,ACAT2,PARK7,ACAT1,HADHB,HSD17B4,HADHA,HADH
IL-10 Signaling	4.46	0.261	NaN	CCR1,BLVRA,TYK2,BLVRB,ARG2,MAPK13,NFKB2,NFKB1,IL18RAP,IL1R2,IKBKB,IL36G,JUN,IL1RN,IL10RA,IL1B,CD14,NFKBIB
Caveolar-mediated Endocytosis Signaling	4.28	0.254	NaN	ITGB1,B2M,COPZ1,ARCN1,HLA-A,COPA,COPE,CD48,RAB5B,COPB2,ITGAL,ITGB7,COPG1,ITGB2,CD55,ITGAM,ITGA1,ACTG1
autophagy	4.06	0.262	NaN	VPS16,VPS41,ATG3,VPS33A,CTSZ,CTSV,CTSD,CTSA,LAMP2,CTSS,CTSH,WIPI1,CTSB,LAMP1,MAP1LC3B,CTSC
Hypoxia Signaling in the Cardiovascular System	4.03	0.243	1	TP53,P4HB,UBE2A,COPS5,UBE2N,UBE2F,HSP90B1,UBE2L3,JUN,HSP90AB1,UBE2B,SUMO1,UBE2V1,HSP90AA1,NFKBIB,UBE2E1,UBE2I,UBE2C
PI3K/AKT Signaling	4.01	0.202	3.8	RAP2B,ITGB1,TP53,RAF1,RHEB,CDC37,YWHAG,YWHAH,YWHAE,YWHAB,PPP2R5D,TYK2,NFKB2,NFKB1,RAP1A,EIF4E,YWHAQ,IKBKB,HSP90B1,GYS1,HSP90AB1,LIMS1,CDKN1A,HSP90AA1,NFKBIB,MAP2K1
Isoleucine Degradation I	3.99	0.5	2.646	HSD17B10,ECHS1,ACAT2,BCAT2,ACAT1,HADHB,HADHA
Apoptosis Signaling	3.88	0.219	0.218	RAP2B,TP53,RAF1,TNFRSF1A,LMNA,BAX,NFKB2,NFKB1,RAP1A,FAS,PARP1,IKBKB,CASP6,CAPN1,BID,CYCS,CAPN2,TNFRSF1B,NFKBIB,CASP8,MAP2K1
Tumoricidal Function of Hepatic Natural Killer Cells	3.79	0.375	1.633	M6PR,CASP6,ICAM1,BID,CYCS,BAX,CASP8,ITGAL,FAS
Tryptophan Degradation III (Eukaryotic)	3.63	0.36	3	HSD17B10,ACAT2,PARK7,HAAO,ACAT1,HADHB,HSD17B4,HADHA,HADH
Lipid Antigen Presentation by CD1	3.48	0.346	NaN	B2M,CALR,AP2M1,AP1G2,PDIA3,CANX,PSAP,AP2A2,AP2S1
BER pathway	3.48	0.5	NaN	PCNA,PNKP,FEN1,APEX1,PARP1,POLB
TNFR1 Signaling	3.37	0.26	2.496	MAP4K2,TNFRSF1A,MAP3K1,NFKB2,NFKB1,IKBKB,TRADD,CASP6,JUN,BID,CYCS,NFKBIB,CASP8
Altered T Cell and B Cell Signaling in Rheumatoid Arthritis	3.36	0.211	NaN	HLA-A,RELB,HLA-DQA1,LTB,NFKB2,HLA-DQB1,NFKB1,FAS,IL36G,CD40,PRTN3,HLA-DMA,IL1RN,TNFSF13,HLA-DMB,IL1B,TNFRSF13B,TNFSF13B,HLA-DRB5
LPS/IL-1 Mediated Inhibition of RXR Function	3.24	0.161	-1.291	ECSIT,GSTM5,SLC27A4,CHST15,IL1R2,ALDH2,IL36G,JUN,SCARB1,RARA,ACSL5,FABP5,TNFRSF1B,ALDH1B1,MGST1,TNFRSF1A,MAP3K1,CHST12,ALDH9A1,GSTO1,PAPSS2,IL18RAP,LY96,NR1H2,MGST2,IL1RN,CAT,IL1B,CD14,ALDH3B1,PLTP,CHST13,NDST1,ACSL1,GSTP1,MGST3
D-glucuronate Degradation I	3.11	1	NaN	AKR1A1,DCXR,CRYL1
Nucleotide Excision Repair Pathway	3.06	0.286	NaN	POLR2I,POLR2F,ERCC1,POLR2D,POLR2C,POLR2E,XPC,POLR2J,POLR2H,RPA1
Role of PKR in Interferon Induction and Antiviral Response	3.06	0.268	NaN	TP53,IKBKB,TNFRSF1A,BID,CYCS,NFKB2,EIF2S1,NFKB1,NFKBIB,CASP8,FCGR1A
Cell Cycle: G1/S Checkpoint Regulation	3.05	0.224	0.302	RPL11,TP53,PA2G4,HDAC1,CUL1,CDK4,SKP1,MYC,CDKN2D,HDAC3,MAX,CCND3,CDKN1A,RPL5,FBXL5
Proline Biosynthesis II (from Arginine)	3.04	0.667	1	PYCR3,PADI4,OAT,PYCR2
Arginine Degradation VI (Arginase 2 Pathway)	3.04	0.667	1	PYCR3,OAT,ARG2,PYCR2
GADD45 Signaling	3	0.368	NaN	TP53,PCNA,GADD45A,CCND3,CDKN1A,CDK4,CCNB1
Graft-versus-Host Disease Signaling	2.99	0.25	NaN	HLA-G,IL36G,IL1RN,HLA-A,HLA-DMA,HLA-DMB,HLA-DQA1,IL1B,HLA-DQB1,HLA-E,HLA-DRB5,FAS
Interferon Signaling	2.95	0.278	3.162	IFITM3,OAS1,TYK2,IFNGR1,IFI35,BAX,PSMB8,IFNAR2,IFITM2,IFNAR1
Acute Phase Response Signaling	2.86	0.165	0.962	ECSIT,RAP2B,RAF1,FN1,SOCS6,MAPK13,NFKB1,HNRNPK,TRADD,IKBKB,IL36G,JUN,CFB,OSM,NFKBIB,TNFRSF1B,MAP2K1,C3,TNFRSF1A,MAP3K1,IL6R,NFKB2,RAP1A,HMOX2,HP,FTL,TF,IL1RN,IL1B
LXR/RXR Activation	2.86	0.182	1.606	ECHS1,C3,MSR1,TNFRSF1A,ARG2,NFKB2,PCYOX1,NFKB1,IL18RAP,IL1R2,IL36G,LY96,NR1H2,TF,IL1RN,IL1B,CD14,S100A8,PLTP,TNFRSF1B,MMP9,HADH
14-3-3-mediated Signaling	2.74	0.173	2.673	RAP2B,TUBA1B,RAF1,YWHAG,YWHAH,YWHAE,YWHAB,PDIA3,TUBB4B,TNFRSF1A,TUBB2A,TUBG1,VIM,BAX,TUBB,RAP1A,YWHAQ,JUN,TUBA1A,TUBA8,TUBB6,PRKCD,PDCD6IP,MAP2K1
Dolichyl-diphosphooligosaccharide Biosynthesis	2.73	0.455	2.236	ALG3,ALG5,DPM2,DPAGT1,DPM3
PPAR Signaling	2.72	0.188	-1.147	RAP2B,RAF1,TNFRSF1A,NFKB2,NFKB1,RAP1A,IL18RAP,IL1R2,IKBKB,IL36G,HSP90B1,JUN,HSP90AB1,IL1RN,IL1B,HSP90AA1,TNFRSF1B,NFKBIB,MAP2K1
Endoplasmic Reticulum Stress Pathway	2.71	0.333	NaN	CALR,HSP90B1,XBP1,DNAJC3,EIF2S1,HSPA5,TAOK3
iNOS Signaling	2.7	0.244	1.897	IKBKB,LY96,JUN,Calm1 (includes others),TYK2,CD14,IFNGR1,NFKB2,MAPK13,NFKB1,NFKBIB
Mitotic Roles of Polo-Like Kinase	2.64	0.212	2.333	KIF23,FZR1,HSP90B1,CDC20,HSP90AB1,CAPN1,PPP2R5D,PTTG1,ANAPC5,CCNB2,HSP90AA1,PLK1,CDC16,CCNB1
Cyclins and Cell Cycle Regulation	2.6	0.198	0.333	TP53,RAF1,PA2G4,PPP2R5D,HDAC1,CUL1,CDK4,CCNB2,SKP1,CCNB1,CCNA2,CDKN2D,HDAC3,CCND3,CDKN1A,FBXL5
Glucocorticoid Receptor Signaling	2.58	0.138	NaN	RAP2B,RAF1,POLR2F,POLR2D,ICAM1,HSPA14,YWHAH,Hspa1b,HSPA1A/HSPA1B,POLR2J,SLPI,MAPK13,HSPA5,NFKB1,FCGR1A,PTGES3,TSC22D3,IL1R2,HSPA4,IKBKB,HSP90B1,POLR2C,JUN,HSP90AB1,SUMO1,ANXA1,SMARCB1,NFKBIB,MAP2K1,POLR2I,TAF9,VCAM1,TAF6,HSPA9,MAP3K1,POLR2H,GTF2F1,RAP1A,CD3D,HSPA8,IL1RN,DUSP1,POLR2E,CDKN1A,FKBP4,HSP90AA1,IL1B,UBE2I
Ethanol Degradation II	2.55	0.265	0.333	ADH5,ALDH2,ALDH1B1,AKR1A1,DHRS9,ALDH3B1,ALDH9A1,ACSL1,DHRS4
Heme Degradation	2.54	0.75	NaN	BLVRA,BLVRB,HMOX2
Glutathione Redox Reactions II	2.54	0.75	NaN	PDIA3,TXNDC12,GLRX
Superpathway of Cholesterol Biosynthesis	2.54	0.286	2.828	FDPS,MVD,SQLE,EBP,ACAT2,ACAT1,HADHB,HADHA
Hereditary Breast Cancer Signaling	2.54	0.164	NaN	POLR2I,RAP2B,TP53,NPM1,POLR2F,POLR2D,HDAC1,TUBG1,CDK4,POLR2J,POLR2H,RPA1,RFC5,RAP1A,CCNB1,POLR2C,HDAC3,GADD45A,POLR2E,H2AFX,SMARCB1,CDKN1A,XPC,RPS27A,RFC3
RAN Signaling	2.52	0.353	NaN	CSE1L,RANGAP1,RAN,KPNA2,RANBP1,IPO5
Superpathway of Geranylgeranyldiphosphate Biosynthesis I (via Mevalonate)	2.52	0.353	2.449	MVD,FDPS,ACAT2,ACAT1,HADHB,HADHA
TWEAK Signaling	2.46	0.257	2.333	IKBKB,TRADD,CASP6,BID,CYCS,NFKB2,NFKB1,NFKBIB,CASP8
Remodeling of Epithelial Adherens Junctions	2.45	0.203	NaN	TUBA1B,NME1,TUBB4B,ARPC5L,TUBB2A,TUBG1,CTNNA1,RAB5B,IQGAP1,TUBB,TUBA1A,TUBB6,TUBA8,ACTG1
Granulocyte Adhesion and Diapedesis	2.41	0.156	NaN	ICAM1,CLDN15,MMP25,IL1R2,IL36G,CXCR2,Ccl2,MMP8,TNFRSF1B,Ccl6,ITGB1,CSF3R,VCAM1,C5AR1,TNFRSF1A,CXCR4,FPR2,ITGAL,IL18RAP,FPR1,Ccl9,ITGB2,ITGAM,IL1RN,CLDN1,IL1B,ITGA1,MMP9
Valine Degradation I	2.38	0.333	2.449	ECHS1,BCAT2,BCKDHA,HIBADH,HADHB,HADHA
Death Receptor Signaling	2.36	0.183	2.183	TNFRSF1A,PARP2,LMNA,NFKB2,NFKB1,FAS,ARHGDIB,PARP1,CASP6,TRADD,IKBKB,BID,CYCS,TNFRSF1B,NFKBIB,CASP8,ACTG1
Leukotriene Biosynthesis	2.36	0.385	-0.447	LTA4H,MGST2,ALOX5,MGST3,DPEP2
Mevalonate Pathway I	2.36	0.385	2.236	MVD,ACAT2,ACAT1,HADHB,HADHA
Role of JAK1, JAK2 and TYK2 in Interferon Signaling	2.34	0.292	NaN	RAF1,TYK2,IFNGR1,NFKB2,NFKB1,IFNAR2,IFNAR1
Virus Entry via Endocytic Pathways	2.29	0.169	NaN	RAP2B,ITGB1,B2M,RAC2,AP2M1,AP3M1,HLA-A,AP2A2,RAP1A,ITGAL,AP2S1,ITGB7,AP1S1,ITGB2,CD55,AP1G2,PRKCD,CLTA,ITGA1,ACTG1
Noradrenaline and Adrenaline Degradation	2.28	0.243	1	ADH5,ALDH2,ALDH1B1,AKR1A1,DHRS9,COMT,ALDH3B1,ALDH9A1,DHRS4
Complement System	2.28	0.243	-1.633	ITGB2,CD55,ITGAM,C3,C5AR1,CFB,C1QBP,CFH,C3AR1
Systemic Lupus Erythematosus Signaling	2.26	0.144	NaN	RAP2B,HLA-A,ZMAT5,TXNL4A,HNRNPA2B1,FCGR1A,LSM2,HLA-G,IL36G,JUN,EFTUD2,SNRPD1,LSM3,SNRPD3,SNRPD2,LSM4,TNFSF13B,SNRPA1,SNRNP40,SNRPB,SNRPF,IL6R,CD3D,RAP1A,PPIH,CD40,LSM12,IL1RN,SNRNP25,SNRPB2,SNRNP70,IL1B,LSM7,HLA-E
Cytotoxic T Lymphocyte-mediated Apoptosis of Target Cells	2.16	0.25	0.816	B2M,CASP6,HLA-A,BID,CYCS,CASP8,CD3D,FAS
April Mediated Signaling	2.12	0.231	1.667	IKBKB,JUN,TNFSF13,MAP3K1,TNFRSF13B,NFKB2,MAPK13,NFKB1,NFKBIB
CD27 Signaling in Lymphocytes	2.11	0.208	0.333	IKBKB,SIVA1,JUN,MAP3K1,BID,CYCS,NFKB2,NFKB1,NFKBIB,CASP8,MAP2K1
FAT10 Cancer Signaling Pathway	2.11	0.217	0	TP53,EEF1A1,IKBKB,PCNA,CXCR4,TNFRSF1A,MAD2L2,NFKB2,NFKB1,TNFRSF1B
Guanine and Guanosine Salvage I	2.08	1	NaN	PNP,HPRT1
Adenine and Adenosine Salvage I	2.08	1	NaN	PNP,APRT
Formaldehyde Oxidation II (Glutathione-dependent)	2.08	1	NaN	ADH5,ESD
Ketogenesis	2.03	0.4	2	ACAT2,ACAT1,HADHB,HADHA
Ketolysis	2.03	0.4	2	ACAT2,ACAT1,HADHB,HADHA
Myc Mediated Apoptosis Signaling	2.02	0.182	NaN	YWHAQ,TP53,MYC,RAP2B,YWHAG,YWHAE,YWHAH,YWHAB,BID,CYCS,BAX,CASP8,RAP1A,FAS
B Cell Activating Factor Signaling	1.98	0.22	1.414	IKBKB,JUN,MAP3K1,TNFRSF13B,NFKB2,MAPK13,NFKB1,NFKBIB,TNFSF13B
p38 MAPK Signaling	1.97	0.161	-0.243	TP53,TIFA,TNFRSF1A,HMGN1,MAPK13,FAS,IL18RAP,MYC,IL1R2,TRADD,IL36G,H3F3A/H3F3B,MAX,IL1RN,DUSP1,IL1B,MAP4K1,RPS6KA4,TNFRSF1B
Cell Cycle Control of Chromosomal Replication	1.94	0.196	NaN	MCM3,MCM5,MCM6,PCNA,MCM2,CDT1,DNA2,TOP2A,CDK4,RPA1,MCM7
Mismatch Repair in Eukaryotes	1.92	0.312	NaN	PCNA,RPA1,FEN1,RFC5,RFC3
Autoimmune Thyroid Disease Signaling	1.92	0.204	NaN	HLA-G,CD40,HLA-A,HLA-DMA,HLA-DMB,HLA-DQA1,HLA-DQB1,HLA-E,HLA-DRB5,FAS
IL-17A Signaling in Fibroblasts	1.91	0.229	NaN	IKBKB,JUN,LCN2,CEBPD,NFKB2,MAPK13,NFKB1,NFKBIB
MIF Regulation of Innate Immunity	1.91	0.214	1.667	TP53,LY96,MIF,JUN,CD14,NFKB2,CD74,NFKB1,NFKBIB
Arginine Biosynthesis IV	1.91	0.5	NaN	OAT,ASS1,GLUD1
GDP-mannose Biosynthesis	1.91	0.5	NaN	GPI,GMPPA,PMM2
Atherosclerosis Signaling	1.9	0.156	NaN	VCAM1,ICAM1,MSR1,CXCR4,NFKB2,PCYOX1,CCR2,NFKB1,PLA2G7,TNFRSF14,PLBD1,ITGB2,IL36G,CD40,IL1RN,IL1B,S100A8,ALOX5,MMP9,PAFAH1B3
Pentose Phosphate Pathway	1.86	0.364	-1	PGD,TKT,PGLS,TALDO1
Assembly of RNA Polymerase II Complex	1.85	0.2	NaN	POLR2I,TAF9,POLR2F,POLR2D,TAF6,POLR2C,POLR2E,POLR2J,POLR2H,GTF2F1
T Helper Cell Differentiation	1.84	0.178	NaN	CD40,HLA-DMA,HLA-A,TNFRSF1A,HLA-DMB,IL6R,IL10RA,HLA-DQA1,IFNGR1,HLA-DQB1,TNFRSF1B,BCL6,HLA-DRB5
Aldosterone Signaling in Epithelial Cells	1.8	0.144	1.342	RAF1,DNAJC9,HSPA14,PDIA3,HSPA9,DNAJC19,HSPA1A/HSPA1B,TRAP1,DNAJC3,DNAJC15,HSPD1,HSPA5,DNAJC11,HSPA8,HSPA4,HSP90B1,HSP90AB1,DUSP1,PRKCD,DNAJB11,HSPE1,HSP90AA1,MAP2K1,DNAJC7,AHCY
TNFR2 Signaling	1.78	0.233	2.646	IKBKB,JUN,MAP3K1,NFKB2,NFKB1,TNFRSF1B,NFKBIB
Glutathione Redox Reactions I	1.73	0.25	0.816	GPX3,MGST1,MGST2,GPX1,GSTP1,MGST3
Guanosine Nucleotides Degradation III	1.72	0.333	0	GDA,NT5E,PNP,NT5C
Toll-like Receptor Signaling	1.7	0.171	0	ECSIT,IKBKB,LY96,IL36G,JUN,IL1RN,MAP3K1,IL1B,CD14,RPS27A,NFKB2,MAPK13,NFKB1
IL-8 Signaling	1.7	0.137	-0.816	RAP2B,RAC2,RAF1,ICAM1,IQGAP1,NFKB1,IKBKB,RHOG,JUN,CCND3,CXCR2,CYBB,NFKBIB,MAP2K1,LASP1,VASP,VCAM1,BAX,RAP1A,CSTB,GNG10,PLD4,ITGB2,ARRB2,ITGAM,RND3,PRKCD,MMP9
Superpathway of Serine and Glycine Biosynthesis I	1.69	0.429	NaN	PSAT1,PHGDH,SHMT2
Dendritic Cell Maturation	1.67	0.138	2.858	B2M,ICAM1,HLA-A,PDIA3,HLA-DQA1,LTB,MAPK13,HLA-DQB1,NFKB1,FCGR1A,IKBKB,IL36G,HLA-DMA,HLA-DMB,LY75,NFKBIB,TNFRSF1B,TNFRSF1A,RELB,NFKB2,CD40,IL1RN,TREM2,IL1B,IRF8,HLA-DRB5,IFNAR1
Production of Nitric Oxide and Reactive Oxygen Species in Macrophages	1.67	0.138	1.569	TNFRSF1A,PPP2R5D,MAP3K1,TYK2,IFNGR1,ARG2,NFKB2,PCYOX1,MAPK13,NFKB1,RAP1A,IKBKB,PPP1R3D,NCF1,JUN,RHOG,RND3,PRKCD,CAT,CYBB,S100A8,IRF8,NFKBIB,TNFRSF1B,PPP1CA,MAP2K1,SIRPA
Ethanol Degradation IV	1.64	0.24	0	ALDH2,ALDH1B1,CAT,ALDH3B1,ALDH9A1,ACSL1
4-1BB Signaling in T Lymphocytes	1.63	0.219	1.633	IKBKB,JUN,NFKB2,MAPK13,NFKB1,NFKBIB,MAP2K1
Glutathione-mediated Detoxification	1.63	0.219	1.134	MGST1,MGST2,GSTM5,GGH,GSTP1,GSTO1,MGST3
S-methyl-5-thio-Î±-D-ribose 1-phosphate Degradation	1.63	0.667	NaN	APIP,ADI1
Hypusine Biosynthesis	1.63	0.667	NaN	EIF5A,DOHH
Purine Nucleotides Degradation II (Aerobic)	1.6	0.263	0.447	GDA,IMPDH2,NT5E,PNP,NT5C
Urate Biosynthesis/Inosine 5'-phosphate Degradation	1.59	0.308	1	IMPDH2,NT5E,PNP,NT5C
Glycolysis I	1.56	0.231	0.816	PGK1,ENO1,GPI,TPI1,PKM,PFKL
Granzyme A Signaling	1.51	0.25	NaN	HIST1H1C,SET,NME1,H1F0,APEX1
MIF-mediated Glucocorticoid Regulation	1.5	0.206	1.89	LY96,MIF,CD14,CD74,NFKB2,NFKBIB,NFKB1
Colanic Acid Building Blocks Biosynthesis	1.48	0.286	1	TSTA3,GPI,GMPPA,PMM2
OX40 Signaling Pathway	1.47	0.156	0.447	B2M,HLA-A,HLA-DQA1,HLA-DQB1,NFKB2,NFKB1,CD3D,HLA-G,JUN,HLA-DMA,HLA-DMB,NFKBIB,HLA-DRB5,HLA-E
Calcium-induced T Lymphocyte Apoptosis	1.44	0.167	2.53	Calm1 (includes others),HLA-A,HLA-DMA,PRKCD,HLA-DMB,HDAC1,HLA-DQA1,CAPN2,HLA-DQB1,CD3D,HLA-DRB5
Xenobiotic Metabolism Signaling	1.43	0.124	NaN	RAP2B,RAF1,CAMK1,GSTM5,MAPK13,NFKB1,PTGES3,CHST15,ALDH2,HSP90B1,HSP90AB1,KEAP1,Ugt1a7c,SUMO1,MAP2K1,ALDH1B1,MGST1,PPP2R5D,MAP3K1,NFKB2,CHST12,RAP1A,ALDH9A1,GSTO1,ESD,FTL,MGST2,PRKCD,CAT,HSP90AA1,IL1B,ALDH3B1,CHST13,NDST1,GSTP1,MGST3,DNAJC7
Oxidative Ethanol Degradation III	1.42	0.238	-0.447	ALDH2,ALDH1B1,ALDH3B1,ALDH9A1,ACSL1
Germ Cell-Sertoli Cell Junction Signaling	1.4	0.133	NaN	RAP2B,ITGB1,TUBA1B,RAC2,PXN,CFL1,TUBB4B,TNFRSF1A,MAP3K1,TUBB2A,TUBG1,CTNNA1,IQGAP1,TUBB,GSN,RAP1A,RHOG,TUBA1A,TUBA8,TUBB6,RND3,KEAP1,MAP2K1,ACTG1
Nur77 Signaling in T Lymphocytes	1.39	0.169	NaN	Calm1 (includes others),HLA-A,HLA-DMA,HLA-DMB,HDAC1,HLA-DQA1,CYCS,HLA-DQB1,CD3D,HLA-DRB5
IL-6 Signaling	1.38	0.14	0.471	RAP2B,RAF1,TNFRSF1A,IL6R,MAPK13,NFKB2,NFKB1,RAP1A,IL18RAP,IL1R2,IKBKB,IL36G,JUN,IL1RN,IL1B,CD14,TNFRSF1B,NFKBIB,MAP2K1
B Cell Development	1.37	0.194	NaN	CD40,HLA-A,HLA-DMA,HLA-DMB,HLA-DQA1,HLA-DQB1,HLA-DRB5
Arsenate Detoxification I (Glutaredoxin)	1.35	0.5	NaN	PNP,GSTO1
Pentose Phosphate Pathway (Oxidative Branch)	1.35	0.5	NaN	PGD,PGLS
Ascorbate Recycling (Cytosolic)	1.35	0.5	NaN	GLRX,GSTO1
Proline Biosynthesis I	1.35	0.5	NaN	PYCR3,PYCR2
Arginine Degradation I (Arginase Pathway)	1.35	0.5	NaN	OAT,ARG2
Polyamine Regulation in Colon Cancer	1.34	0.227	NaN	MYC,PSME1,MAX,MXD1,PSME2
Bladder Cancer Signaling	1.33	0.149	1.342	MYC,TP53,RAP2B,RAF1,PA2G4,THBS1,MMP8,CDKN1A,CDK4,MMP25,MAP2K1,RAP1A,MMP9,RASSF1
NF-ÎºB Activation by Viruses	1.3	0.147	2.138	RAP2B,ITGB1,RAF1,MAP3K1,NFKB2,NFKB1,ITGAL,RAP1A,TNFRSF14,IKBKB,ITGB2,PRKCD,ITGA1,NFKBIB
Granzyme B Signaling	1.28	0.25	2	BID,CYCS,CASP8,PARP1
Extrinsic Prothrombin Activation Pathway	1.28	0.25	-1	F10,PROS1,F5,F13A1
Vitamin-C Transport	1.28	0.25	NaN	TXN,GLRX,GSTO1,SLC2A3
Parkinson's Signaling	1.28	0.25	NaN	SEPT5,PARK7,CYCS,MAPK13
Hepatic Fibrosis / Hepatic Stellate Cell Activation	1.26	0.129	NaN	VCAM1,ICAM1,FN1,MYH9,TNFRSF1A,IL6R,IFNGR1,BAX,NFKB2,IFNAR2,NFKB1,FAS,IL18RAP,IL1R2,LY96,CD40,IL10RA,EDNRA,IL1B,CD14,ECE1,TNFRSF1B,MMP9,IFNAR1
STAT3 Pathway	1.25	0.136	0.302	RAP2B,RAF1,IL13RA1,SOCS6,TYK2,IL6R,MAPK13,RAP1A,NDUFA13,IL18RAP,MYC,IL1R2,CXCR2,CDKN1A,IL10RA,IL1B,MAP2K1,IFNAR1
Salvage Pathways of Pyrimidine Ribonucleotides	1.23	0.144	2.673	PYCR3,NME1,APOBEC1,NME2,CSNK1A1,CDK4,PLK1,PRKX,PRKCD,UCK1,CMPK1,HIPK1,ADPGK,MAP2K1
Crosstalk between Dendritic Cells and Natural Killer Cells	1.21	0.146	NaN	HLA-A,LTB,NFKB2,NFKB1,ITGAL,FAS,HLA-G,CD40,TREM2,TNFRSF1B,ACTG1,HLA-E,HLA-DRB5
Estrogen Receptor Signaling	1.19	0.134	NaN	POLR2I,RAP2B,RAF1,TAF9,POLR2F,TAF6,POLR2D,PHB2,POLR2J,POLR2H,GTF2F1,RAP1A,H3F3A/H3F3B,POLR2C,HDAC3,POLR2E,MED10,MAP2K1
Acute Myeloid Leukemia Signaling	1.17	0.141	1.667	CSF3R,MYC,RAP2B,RAF1,IDH3G,RARA,IDH2,NFKB2,NFKB1,MAP2K1,RAP1A,CSF1R,IDH3B,IDH1
Serine Biosynthesis	1.16	0.4	NaN	PSAT1,PHGDH
CMP-N-acetylneuraminate Biosynthesis I (Eukaryotes)	1.16	0.4	NaN	NAGK,NANS
Eumelanin Biosynthesis	1.16	0.4	NaN	MIF,DDT
Androgen Signaling	1.14	0.132	1.134	POLR2I,CALR,POLR2F,POLR2D,Calm1 (includes others),POLR2J,POLR2H,GTF2F1,NFKB2,NFKB1,GNG10,NCOA4,HSPA4,JUN,POLR2C,POLR2E,PRKCD,HSP90AA1
Tryptophan Degradation X (Mammalian, via Tryptamine)	1.14	0.2	0.447	ALDH2,ALDH1B1,AKR1A1,ALDH3B1,ALDH9A1
Agranulocyte Adhesion and Diapedesis	1.14	0.125	NaN	ITGB1,VCAM1,ICAM1,C5AR1,FN1,MYH9,CLDN15,CXCR4,TNFRSF1A,MMP25,ITGB7,Ccl9,ITGB2,IL36G,CLDN1,IL1RN,CXCR2,Ccl2,MMP8,IL1B,ITGA1,Ccl6,ACTG1,MMP9
UVC-Induced MAPK Signaling	1.12	0.163	1.414	RAP2B,TP53,RAF1,JUN,PRKCD,MAPK13,MAP2K1,RAP1A
TREM1 Signaling	1.1	0.147	0.905	ITGB1,TREM1,NLRP3,ICAM1,CD40,NLRP12,LAT2,CASP1,IL1B,NFKB2,NFKB1
Gluconeogenesis I	1.08	0.192	1.342	PGK1,ENO1,GPI,ME2,MDH1
HIPPO signaling	1.06	0.141	-2.121	YWHAQ,PPP1R3D,YWHAG,YWHAE,YWHAH,YWHAB,PPP2R5D,CUL1,CD44,PPP1CA,SKP1,RASSF1
Prostate Cancer Signaling	1.06	0.136	NaN	RAP2B,TP53,RAF1,PA2G4,NFKB2,NFKB1,RAP1A,HSP90B1,HSP90AB1,CDKN1A,HSP90AA1,NFKBIB,MAP2K1,GSTP1
Histamine Degradation	1.05	0.211	0	ALDH1B1,ALDH2,ALDH3B1,ALDH9A1
Glioma Signaling	1.04	0.131	1.134	RAP2B,TP53,RAF1,Calm1 (includes others),CAMK1,PA2G4,IDH3G,CDK4,RAP1A,IDH1,CDKN2D,PRKCD,CDKN1A,IDH2,MAP2K1,IDH3B
Methylthiopropionate Biosynthesis	1.04	1	NaN	ADI1
Glutamate Removal from Folates	1.04	1	NaN	GGH
Xanthine and Xanthosine Salvage	1.04	1	NaN	PNP
Sorbitol Degradation I	1.04	1	NaN	SORD
Histamine Biosynthesis	1.04	1	NaN	HDC
Alanine Biosynthesis III	1.04	1	NaN	NFS1
Regulation of IL-2 Expression in Activated and Anergic T Lymphocytes	1.03	0.14	NaN	RAP2B,RAF1,IKBKB,JUN,Calm1 (includes others),MAP3K1,NFKB2,NFKB1,NFKBIB,CD3D,MAP2K1,RAP1A
HMGB1 Signaling	1.03	0.128	1.414	RAP2B,VCAM1,ICAM1,HAT1,TNFRSF1A,RBBP7,IFNGR1,MAPK13,NFKB2,NFKB1,RAP1A,JUN,RHOG,RND3,OSM,IL1B,TNFRSF1B,MAP2K1
Hepatic Cholestasis	1.02	0.125	NaN	MAP4K2,CYP27A1,TNFRSF1A,NFKB2,NFKB1,HSD3B7,IL18RAP,IL1R2,IKBKB,IL36G,LY96,JUN,IL1RN,RARA,PRKCD,OSM,IL1B,CD14,TNFRSF1B,NFKBIB
Urea Cycle	1.01	0.333	NaN	ASS1,ARG2
Ceramide Degradation	1.01	0.333	NaN	ACER3,ASAH1
Glycogen Biosynthesis II (from UDP-D-Glucose)	1.01	0.333	NaN	GYS1,GBE1
Communication between Innate and Adaptive Immune Cells	1.01	0.135	NaN	HLA-G,B2M,IL36G,CD40,HLA-A,IL1RN,TNFSF13,IL1B,TNFRSF13B,HLA-E,TNFSF13B,HLA-DRB5,Ccl9
Small Cell Lung Cancer Signaling	1	0.138	0.816	MYC,TP53,IKBKB,MAX,PA2G4,CDK4,CKS1B,BID,CYCS,NFKB2,NFKB1,NFKBIB
Fatty Acid Activation	0.959	0.231	NaN	ACSL5,SLC27A4,ACSL1
PI3K Signaling in B Lymphocytes	0.955	0.126	3	CD81,RAP2B,RAF1,Calm1 (includes others),ATF3,C3,PDIA3,NFKB2,NFKB1,RAP1A,IKBKB,JUN,CD40,CD180,ATF6B,NFKBIB,MAP2K1
Integrin Signaling	0.955	0.118	-0.408	RAP2B,RAF1,RAC2,PFN1,ITGB7,TSPAN3,RHOG,ARF4,MAP2K1,VASP,MYL12A,ITGB1,PXN,ARPC5L,GSN,ITGAL,RAP1A,ITGB2,ITGAM,RND3,LIMS1,CAPN1,ITGA1,CAPN2,ACTG1,Arf2
Sertoli Cell-Sertoli Cell Junction Signaling	0.943	0.12	NaN	RAP2B,ITGB1,TUBA1B,RAF1,CLDN15,TUBB4B,TNFRSF1A,MAP3K1,TUBB2A,TUBG1,CTNNA1,MAPK13,TUBB,RAP1A,JUN,TUBA1A,TUBA8,TUBB6,CLDN1,KEAP1,MAP2K1,ACTG1
Activation of IRF by Cytosolic Pattern Recognition Receptors	0.924	0.143	1.667	IKBKB,JUN,CD40,PPIB,MAVS,NFKB2,NFKB1,NFKBIB,IFNAR1
Th1 Pathway	0.914	0.124	3.207	ICAM1,HLA-A,TYK2,IL6R,HLA-DQA1,IFNGR1,HLA-DQB1,NFKB1,CD3D,ITGB2,CD40,HLA-DMA,APH1A,HLA-DMB,IL10RA,IFNAR1,HLA-DRB5
Antioxidant Action of Vitamin C	0.91	0.128	-1.265	PDIA3,NFKB2,MAPK13,NFKB1,GLRX,PLA2G7,SLC2A3,GSTO1,PLBD1,PLD4,IKBKB,TXN,NFKBIB,PAFAH1B3
Telomerase Signaling	0.893	0.126	1.508	TP53,RAP2B,RAF1,PPP2R5D,HDAC1,DKC1,RAP1A,PTGES3,MYC,HSP90B1,HDAC3,HSP90AB1,CDKN1A,HSP90AA1,MAP2K1
Pentose Phosphate Pathway (Non-oxidative Branch)	0.889	0.286	NaN	TKT,TALDO1
Acetyl-CoA Biosynthesis I (Pyruvate Dehydrogenase Complex)	0.889	0.286	NaN	PDHA1,PDHB
Adenine and Adenosine Salvage III	0.889	0.286	NaN	PNP,HPRT1
Aspartate Degradation II	0.889	0.286	NaN	MDH1,GOT2
Ceramide Signaling	0.879	0.129	1.941	RAP2B,RAF1,TNFRSF1A,PPP2R5D,MAP3K1,NFKB2,NFKB1,RAP1A,CTSD,JUN,CYCS,TNFRSF1B,MAP2K1
NF-ÎºB Signaling	0.873	0.118	0.853	RAP2B,RAF1,TNFRSF1A,RELB,UBE2N,HDAC1,MAP3K1,NFKB2,NFKB1,RAP1A,IL1R2,IKBKB,TRADD,IL36G,CD40,IL1RN,UBE2V1,IL1B,TNFRSF1B,NFKBIB,CASP8,TNFSF13B
Serotonin Degradation	0.863	0.135	1.265	ADH5,ALDH2,ALDH1B1,AKR1A1,EXT2,DHRS9,Ugt1a7c,ALDH3B1,ALDH9A1,DHRS4
Fatty Acid Î±-oxidation	0.863	0.182	0	ALDH1B1,ALDH2,ALDH3B1,ALDH9A1
VEGF Signaling	0.863	0.126	0.816	RAP2B,RAF1,PXN,YWHAE,EIF2S3,EIF2S1,EIF2B2,RAP1A,EIF2S2,EIF2B1,MAP2K1,ACTG1,EIF1AY,EIF1AX
Pyridoxal 5'-phosphate Salvage Pathway	0.86	0.138	1.667	PDXK,PRKX,PRKCD,CSNK1A1,CDK4,PLK1,HIPK1,ADPGK,MAP2K1
Agrin Interactions at Neuromuscular Junction	0.836	0.133	0.632	ITGB1,RAP2B,ITGB2,RAC2,PXN,JUN,ITGA1,ITGAL,ACTG1,RAP1A
Role of CHK Proteins in Cell Cycle Checkpoint Control	0.833	0.14	1	TP53,PCNA,PPP2R5D,CDKN1A,RPA1,PLK1,RFC5,RFC3
Amyotrophic Lateral Sclerosis Signaling	0.821	0.124	-0.535	TP53,GPX1,SOD1,RAB5B,BAX,GRINA,CCS,CAPN1,CAT,CASP1,BID,CYCS,CAPN2,SSR4
Chronic Myeloid Leukemia Signaling	0.821	0.124	NaN	TP53,RAP2B,RAF1,PA2G4,HDAC1,CDK4,NFKB2,NFKB1,RAP1A,MYC,IKBKB,HDAC3,CDKN1A,MAP2K1
Role of Tissue Factor in Cancer	0.821	0.121	NaN	RAP2B,TP53,ITGB1,P4HB,CFL1,EGR1,PLAUR,MAPK13,RAP1A,EIF4E,F10,ARRB2,PDIA6,IL1B,RPS6KA4,FGR
Superpathway of Citrulline Metabolism	0.815	0.2	NaN	OAT,ASS1,ARG2
Glycogen Degradation III	0.815	0.2	NaN	GAA,PYGL,PGM2
Pyrimidine Deoxyribonucleotides De Novo Biosynthesis I	0.812	0.174	2	NME1,NME2,CMPK1,RRM1
Putrescine Degradation III	0.812	0.174	0	ALDH1B1,ALDH2,ALDH3B1,ALDH9A1
Oncostatin M Signaling	0.81	0.15	0.816	RAP2B,RAF1,TYK2,OSM,MAP2K1,RAP1A
LPS-stimulated MAPK Signaling	0.801	0.126	1.155	RAP2B,RAF1,IKBKB,JUN,PRKCD,CD14,NFKB2,MAPK13,NFKB1,NFKBIB,MAP2K1,RAP1A
Airway Pathology in Chronic Obstructive Pulmonary Disease	0.79	0.25	NaN	MMP8,MMP9
Allograft Rejection Signaling	0.79	0.128	NaN	HLA-G,B2M,CD40,HLA-A,HLA-DMA,HLA-DMB,HLA-DQA1,HLA-DQB1,HLA-E,HLA-DRB5,FAS
Rac Signaling	0.79	0.121	1.291	RAP2B,ITGB1,RAF1,CFL1,ARPC5L,MAP3K1,NFKB2,IQGAP1,NFKB1,RAP1A,CYFIP2,JUN,CD44,CYBB,MAP2K1
Sphingosine and Sphingosine-1-phosphate Metabolism	0.79	0.25	NaN	ACER3,ASAH1
Superoxide Radicals Degradation	0.79	0.25	NaN	CAT,SOD1
Purine Ribonucleosides Degradation to Ribose-1-phosphate	0.79	0.25	NaN	PNP,PGM2
CD28 Signaling in T Helper Cells	0.783	0.119	2.828	Calm1 (includes others),ARPC5L,HLA-A,MAP3K1,HLA-DQA1,HLA-DQB1,NFKB2,NFKB1,CD3D,IKBKB,JUN,HLA-DMA,HLA-DMB,NFKBIB,MAP2K1,HLA-DRB5
Chemokine Signaling	0.783	0.13	0	RAP2B,RAF1,JUN,Calm1 (includes others),CAMK1,CFL1,CXCR4,MAPK13,MAP2K1,RAP1A
D-myo-inositol (1,4,5,6)-Tetrakisphosphate Biosynthesis	0.777	0.118	3.153	MINPP1,PPP2R5D,NUDT9,MDP1,NUDT14,IGBP1,NT5C,NUDT5,SET,ATP1A1,DUSP1,PTPRO,DUSP12,PPP1CA,NUDT4,PPP5C,SIRPA
D-myo-inositol (3,4,5,6)-tetrakisphosphate Biosynthesis	0.777	0.118	3.153	MINPP1,PPP2R5D,NUDT9,MDP1,NUDT14,IGBP1,NT5C,NUDT5,SET,ATP1A1,DUSP1,PTPRO,DUSP12,PPP1CA,NUDT4,PPP5C,SIRPA
Eicosanoid Signaling	0.777	0.132	-1.633	PLBD1,LTA4H,LTB4R,FPR2,CYSLTR1,ALOX5,PLA2G7,DPEP2,PAFAH1B3
Leukocyte Extravasation Signaling	0.772	0.113	-1.091	ITGB1,RAC2,VCAM1,PXN,ICAM1,CLDN15,CXCR4,CTNNA1,MAPK13,MMP25,RAP1A,ITGAL,ITGB2,NCF1,ITGAM,CLDN1,PRKCD,MMP8,CD44,CYBB,ITGA1,ACTG1,MMP9,VASP
Neuroinflammation Signaling Pathway	0.77	0.109	2.744	B2M,ICAM1,PYCARD,HLA-A,HLA-DQA1,CX3CR1,HLA-DQB1,MAPK13,NFKB1,FAS,GRINA,IKBKB,JUN,HLA-DMA,HLA-DMB,CYBB,CASP1,CASP8,VCAM1,NLRP3,TNFRSF1A,TYK2,IL6R,IFNGR1,NFKB2,CSF1R,BIRC5,CD40,TREM2,APH1A,IL1B,MMP9,HLA-DRB5,P2RX7
Epoxysqualene Biosynthesis	0.757	0.5	NaN	SQLE
L-DOPA Degradation	0.757	0.5	NaN	COMT
Spermidine Biosynthesis I	0.757	0.5	NaN	SRM
Sulfate Activation for Sulfonation	0.757	0.5	NaN	PAPSS2
Glycine Degradation (Creatine Biosynthesis)	0.757	0.5	NaN	GATM
GDP-L-fucose Biosynthesis I (from GDP-D-mannose)	0.757	0.5	NaN	TSTA3
Glycine Biosynthesis I	0.757	0.5	NaN	SHMT2
Glutamate Biosynthesis II	0.757	0.5	NaN	GLUD1
Glutamate Degradation X	0.757	0.5	NaN	GLUD1
ATM Signaling	0.754	0.124	0.333	TP53,JUN,CBX1,GADD45A,PPP2R5D,H2AFX,CDKN1A,CCNB2,BID,MAPK13,CBX3,CCNB1
Adenosine Nucleotides Degradation II	0.754	0.188	NaN	NT5E,PNP,NT5C
ERK5 Signaling	0.75	0.13	3	YWHAQ,MYC,RAP2B,YWHAG,YWHAE,YWHAH,YWHAB,RPS6KA4,RAP1A
PPARÎ±/RXRÎ± Activation	0.73	0.113	-0.688	RAP2B,RAF1,ACAA1,PDIA3,NFKB2,NFKB1,AP2A2,RAP1A,ADIPOR1,IL18RAP,IL1R2,IKBKB,ACADL,HSP90B1,JUN,HSP90AB1,IL1B,HSP90AA1,GOT2,NFKBIB,MAP2K1
Cdc42 Signaling	0.719	0.114	0	ITGB1,B2M,RAF1,CFL1,HLA-A,ARPC5L,HLA-DQA1,MAPK13,HLA-DQB1,IQGAP1,CD3D,HLA-G,JUN,HLA-DMA,HLA-DMB,CDC42SE1,HLA-E,HLA-DRB5,MYL12A
Protein Kinase A Signaling	0.719	0.105	0.87	HIST1H1C,RAF1,Calm1 (includes others),YWHAH,PDIA3,TIMM50,DUSP22,NFKB1,YWHAQ,CDKN3,DUSP3,GYS1,PTPRO,CDC16,PPP1CA,DUSP12,NFKBIB,APEX1,MAP2K1,VASP,MYL12A,SMPDL3A,KDELR1,PXN,PDE2A,YWHAG,YWHAE,YWHAB,MAP3K1,PYGL,NFKB2,RAP1A,GNG10,PPP1R3D,H3F3A/H3F3B,DUSP1,PRKCD,ANAPC5,H1F0,EBI3,SIRPA,KDELR2
Role of JAK family kinases in IL-6-type Cytokine Signaling	0.719	0.16	NaN	IL6R,TYK2,OSM,MAPK13
CDP-diacylglycerol Biosynthesis I	0.719	0.16	-2	LPCAT2,AGPAT2,CDS2,MBOAT7
Role of BRCA1 in DNA Damage Response	0.71	0.125	1	TP53,GADD45A,CDKN1A,SMARCB1,RPA1,BABAM1,PLK1,RFC5,BRCC3,RFC3
Apelin Adipocyte Signaling Pathway	0.71	0.125	1.265	GPX3,MGST1,MGST2,CAT,GPX1,CYBB,SOD1,MAPK13,GSTP1,MGST3
DNA Methylation and Transcriptional Repression Signaling	0.708	0.147	NaN	HIST1H4A,H3F3A/H3F3B,HDAC1,MTA2,RBBP7
Inhibition of Angiogenesis by TSP1	0.708	0.147	0.447	TP53,JUN,THBS1,MAPK13,MMP9
Sucrose Degradation V (Mammalian)	0.706	0.222	NaN	KHK,TPI1
Citrulline Biosynthesis	0.706	0.222	NaN	OAT,ARG2
Heme Biosynthesis II	0.706	0.222	NaN	UROD,HMBS
Folate Transformations I	0.706	0.222	NaN	MTHFS,SHMT2
Î³-linolenate Biosynthesis II (Animals)	0.699	0.176	NaN	ACSL5,SLC27A4,ACSL1
Mitochondrial L-carnitine Shuttle Pathway	0.699	0.176	NaN	ACSL5,SLC27A4,ACSL1
fMLP Signaling in Neutrophils	0.695	0.116	1.155	RAP2B,RAF1,Calm1 (includes others),ARPC5L,FPR2,NFKB2,NFKB1,RAP1A,GNG10,FPR1,NCF1,PRKCD,CYBB,NFKBIB,MAP2K1
Antiproliferative Role of TOB in T Cell Signaling	0.676	0.154	NaN	PABPC1,CCNA2,CUL1,SKP1
Estrogen-mediated S-phase Entry	0.676	0.154	1	MYC,CCNA2,CDKN1A,CDK4
Role of RIG1-like Receptors in Antiviral Innate Immunity	0.674	0.136	2.236	IKBKB,MAVS,NFKB2,NFKB1,CASP8,NFKBIB
Stearate Biosynthesis I (Animals)	0.674	0.136	0	FAM213B,ACSL5,ACOT7,SLC27A4,ACSL1,MBOAT7
Coagulation System	0.672	0.143	-0.447	F10,PROS1,F5,F13A1,PLAUR
Regulation of Cellular Mechanics by Calpain Protease	0.664	0.127	0.816	RAP2B,ITGB1,CCNA2,PXN,CAPN1,CDK4,CAPN2,RAP1A
Role of Macrophages, Fibroblasts and Endothelial Cells in Rheumatoid Arthritis	0.658	0.105	NaN	RAP2B,RAF1,FN1,Calm1 (includes others),ICAM1,PDIA3,CSNK1A1,CEBPD,LTB,NFKB1,FCGR1A,MYC,IL1R2,TRADD,IKBKB,IL36G,JUN,OSM,TNFRSF1B,NFKBIB,MAP2K1,TNFSF13B,MIF,VCAM1,C5AR1,TNFRSF1A,IL6R,RAP1A,CEBPE,IL18RAP,IL16,IL1RN,PRKCD,IL1B
Role of IL-17F in Allergic Inflammatory Airway Diseases	0.644	0.133	0.816	RAF1,IL1B,RPS6KA4,NFKB2,NFKB1,MAP2K1
D-myo-inositol-5-phosphate Metabolism	0.642	0.111	3.3	MINPP1,PPP2R5D,NUDT9,MDP1,NUDT14,IGBP1,NT5C,PLD4,NUDT5,SET,ATP1A1,PTPRO,DUSP1,DUSP12,PPP1CA,NUDT4,PPP5C,SIRPA
T Cell Exhaustion Signaling Pathway	0.642	0.11	2.53	RAP2B,HLA-A,PPP2R5D,BATF,TYK2,IL6R,HLA-DQA1,HLA-DQB1,BCL6,IFNAR2,RAP1A,TNFRSF14,HLA-G,JUN,HLA-DMA,HLA-DMB,IL10RA,HLA-E,IFNAR1,HLA-DRB5
Neuregulin Signaling	0.638	0.118	1.89	RPS6,MYC,ITGB1,RAP2B,RAF1,HSP90B1,HSP90AB1,PRKCD,HSP90AA1,MAP2K1,RAP1A
Phosphatidylglycerol Biosynthesis II (Non-plastidic)	0.636	0.148	-2	LPCAT2,AGPAT2,CDS2,MBOAT7
Calcium Transport I	0.635	0.2	NaN	ATP2B1,ANXA5
GDP-glucose Biosynthesis	0.635	0.2	NaN	HK3,PGM2
Mineralocorticoid Biosynthesis	0.635	0.2	NaN	EBP,HSD3B7
p53 Signaling	0.631	0.115	0	TP53,HDAC1,CDK4,BAX,ST13,BIRC5,FAS,CASP6,PCNA,JUN,GADD45A,THBS1,CDKN1A
Dopamine Degradation	0.606	0.135	0.447	ALDH2,ALDH1B1,COMT,ALDH3B1,ALDH9A1
L-carnitine Biosynthesis	0.602	0.333	NaN	ALDH9A1
Diphthamide Biosynthesis	0.602	0.333	NaN	EEF2
Methylglyoxal Degradation I	0.602	0.333	NaN	GLO1
Tetrahydrobiopterin Biosynthesis I	0.602	0.333	NaN	SPR
L-cysteine Degradation III	0.602	0.333	NaN	GOT2
Inosine-5'-phosphate Biosynthesis II	0.602	0.333	NaN	PAICS
4-hydroxyproline Degradation I	0.602	0.333	NaN	GOT2
Thyroid Hormone Biosynthesis	0.602	0.333	NaN	CTSD
Methylglyoxal Degradation III	0.602	0.158	NaN	AKR1A1,FAM213B,AKR1B1
Oxidized GTP and dGTP Detoxification	0.602	0.333	NaN	RUVBL2
Tetrahydrobiopterin Biosynthesis II	0.602	0.333	NaN	SPR
Glutamate Degradation II	0.602	0.333	NaN	GOT2
S-adenosyl-L-methionine Biosynthesis	0.602	0.333	NaN	MAT2A
DNA damage-induced 14-3-3Ïƒ Signaling	0.602	0.158	NaN	TP53,CCNB2,CCNB1
Aspartate Biosynthesis	0.602	0.333	NaN	GOT2
PEDF Signaling	0.599	0.116	1.265	RAP2B,TP53,RAF1,IKBKB,NFKB2,MAPK13,NFKB1,NFKBIB,CASP8,RAP1A,FAS
HIF1Î± Signaling	0.58	0.111	NaN	TP53,RAP2B,EGLN2,COPS5,MAPK13,MMP25,NAA10,RAP1A,SLC2A3,JUN,MMP8,HSP90AA1,APEX1,MMP9
ILK Signaling	0.578	0.107	1.414	ITGB1,PXN,FN1,MYH9,CFL1,TNFRSF1A,PPP2R5D,VIM,NFKB2,NFKB1,ITGB7,MYC,ITGB2,JUN,RHOG,RND3,LIMS1,RPS6KA4,ACTG1,MMP9,NACA
Th1 and Th2 Activation Pathway	0.575	0.107	NaN	CCR1,ICAM1,HLA-A,CXCR4,TYK2,IL6R,HLA-DQA1,IFNGR1,HLA-DQB1,NFKB1,CD3D,ITGB2,JUN,CD40,HLA-DMA,APH1A,HLA-DMB,IL10RA,IFNAR1,HLA-DRB5
Glucose and Glucose-1-phosphate Degradation	0.573	0.182	NaN	HK3,PGM2
Purine Nucleotides De Novo Biosynthesis II	0.573	0.182	NaN	IMPDH2,PAICS
Glucocorticoid Biosynthesis	0.573	0.182	NaN	EBP,HSD3B7
UDP-N-acetyl-D-galactosamine Biosynthesis II	0.573	0.182	NaN	GPI,HK3
Cholecystokinin/Gastrin-mediated Signaling	0.562	0.112	0	RAP2B,RAF1,PXN,IL36G,JUN,RHOG,RND3,IL1RN,PRKCD,IL1B,MAP2K1,RAP1A
The Visual Cycle	0.561	0.15	NaN	DHRS3,DHRS9,DHRS4
Tight Junction Signaling	0.558	0.107	NaN	MYH9,CLDN15,TNFRSF1A,PPP2R5D,CDK4,CTNNA1,NFKB2,NFKB1,GPAA1,NSF,JUN,CLDN1,NUDT21,TNFRSF1B,GOSR2,NAPA,ACTG1,VASP
3-phosphoinositide Degradation	0.554	0.108	3.153	MINPP1,PPP2R5D,NUDT9,MDP1,NUDT14,IGBP1,NT5C,NUDT5,SET,ATP1A1,DUSP1,PTPRO,DUSP12,PPP1CA,NUDT4,PPP5C,SIRPA
VDR/RXR Activation	0.547	0.115	-1.633	SERPINB1,CAMP,GADD45A,PRKCD,CDKN1A,MXD1,CD14,KLF4,PSMC5
Epithelial Adherens Junction Signaling	0.539	0.107	NaN	RAP2B,TUBA1B,MYH9,ARPC5L,TUBB4B,TUBG1,TUBB2A,CTNNA1,IQGAP1,TUBB,RAP1A,TUBA1A,TUBB6,TUBA8,KEAP1,ACTG1
Regulation of Actin-based Motility by Rho	0.527	0.112	0	ITGB1,RAC2,RHOG,PFN1,CFL1,RND3,ARPC5L,ARHGDIA,GSN,MYL12A
Role of MAPK Signaling in the Pathogenesis of Influenza	0.527	0.114	NaN	RAP2B,PLBD1,RAF1,MAPK13,BAX,PLA2G7,MAP2K1,RAP1A,PAFAH1B3
p70S6K Signaling	0.521	0.107	1.897	RAP2B,RAF1,YWHAG,YWHAE,YWHAH,YWHAB,EEF2,PDIA3,PPP2R5D,RAP1A,RPS6,YWHAQ,PRKCD,BCAP31,MAP2K1
Breast Cancer Regulation by Stathmin1	0.521	0.104	NaN	RAP2B,TP53,TUBA1B,RAF1,CAMK1,Calm1 (includes others),TUBB4B,PPP2R5D,TUBB2A,TUBG1,TUBB,RAP1A,GNG10,STMN1,PPP1R3D,TUBA1A,TUBA8,TUBB6,PRKCD,CDKN1A,PPP1CA,MAP2K1
Assembly of RNA Polymerase I Complex	0.52	0.167	NaN	POLR1D,POLR2F
Role of NFAT in Regulation of the Immune Response	0.502	0.104	3.3	RAP2B,RAF1,Calm1 (includes others),HLA-A,HLA-DQA1,CSNK1A1,NFKB2,HLA-DQB1,NFKB1,CD3D,RAP1A,FCGR1A,GNG10,IKBKB,JUN,HLA-DMA,HLA-DMB,NFKBIB,MAP2K1,HLA-DRB5
Th2 Pathway	0.499	0.105	0	CCR1,ICAM1,CXCR4,HLA-A,TYK2,HLA-DQA1,HLA-DQB1,NFKB1,CD3D,ITGB2,JUN,CD40,HLA-DMA,APH1A,HLA-DMB,HLA-DRB5
Uracil Degradation II (Reductive)	0.496	0.25	NaN	DPYSL2
PRPP Biosynthesis I	0.496	0.25	NaN	PRPS1
Branched-chain Î±-keto acid Dehydrogenase Complex	0.496	0.25	NaN	BCKDHA
Heme Biosynthesis from Uroporphyrinogen-III I	0.496	0.25	NaN	UROD
Phenylethylamine Degradation I	0.496	0.25	NaN	ALDH2
Î±-tocopherol Degradation	0.496	0.25	NaN	CYP4F2
Thymine Degradation	0.496	0.25	NaN	DPYSL2
L-cysteine Degradation I	0.496	0.25	NaN	GOT2
N-acetylglucosamine Degradation II	0.496	0.25	NaN	NAGK
Phenylalanine Degradation I (Aerobic)	0.496	0.25	NaN	QDPR
Molybdenum Cofactor Biosynthesis	0.496	0.25	NaN	NFS1
Acetate Conversion to Acetyl-CoA	0.496	0.25	NaN	ACSL1
Fatty Acid Î²-oxidation III (Unsaturated, Odd Number)	0.496	0.25	NaN	ECI1
Mechanisms of Viral Exit from Host Cells	0.493	0.122	NaN	CHMP6,CHMP2B,PRKCD,PDCD6IP,ACTG1
JAK/Stat Signaling	0.493	0.11	1.265	RAP2B,RAF1,JUN,CDKN1A,SOCS6,TYK2,NFKB2,NFKB1,MAP2K1,RAP1A
CD40 Signaling	0.491	0.111	1.667	IKBKB,JUN,ICAM1,CD40,NFKB2,MAPK13,NFKB1,NFKBIB,MAP2K1
Methionine Degradation I (to Homocysteine)	0.485	0.136	NaN	PRMT3,MAT2A,AHCY
ERK/MAPK Signaling	0.484	0.102	1.213	RAP2B,ITGB1,RAC2,RAF1,PXN,YWHAG,YWHAH,YWHAB,PPP2R5D,VRK2,RAP1A,EIF4E,YWHAQ,MYC,PPP1R3D,H3F3A/H3F3B,DUSP1,PRKCD,RPS6KA4,PPP1CA,MAP2K1
FcÎ³ Receptor-mediated Phagocytosis in Macrophages and Monocytes	0.476	0.109	0	PLD4,RAC2,NCF1,PXN,ARPC5L,PRKCD,ACTG1,FCGR1A,VASP,FGR
Role of IL-17A in Psoriasis	0.472	0.154	NaN	S100A9,S100A8
Cholesterol Biosynthesis I	0.472	0.154	NaN	SQLE,EBP
NAD Phosphorylation and Dephosphorylation	0.472	0.154	NaN	Acp5,NADK
Glycogen Degradation II	0.472	0.154	NaN	PYGL,PGM2
Bile Acid Biosynthesis, Neutral Pathway	0.472	0.154	NaN	CYP27A1,HSD3B7
Cholesterol Biosynthesis II (via 24,25-dihydrolanosterol)	0.472	0.154	NaN	SQLE,EBP
Cholesterol Biosynthesis III (via Desmosterol)	0.472	0.154	NaN	SQLE,EBP
Retinoic acid Mediated Apoptosis Signaling	0.469	0.113	1.89	RARA,PARP2,BID,CYCS,CASP8,IFNAR1,PARP1
Actin Nucleation by ARP-WASP Complex	0.469	0.113	1.134	ITGB1,RAP2B,RHOG,RND3,ARPC5L,RAP1A,VASP
IGF-1 Signaling	0.469	0.106	0.378	YWHAQ,RAP2B,RAF1,PXN,JUN,YWHAG,YWHAE,YWHAH,YWHAB,SOCS6,MAP2K1,RAP1A
Melanoma Signaling	0.45	0.111	0.378	RAP2B,TP53,RAF1,CDKN1A,CDK4,RAP1A,MAP2K1
RANK Signaling in Osteoclasts	0.45	0.106	1.265	RAF1,IKBKB,JUN,Calm1 (includes others),MAP3K1,NFKB2,MAPK13,NFKB1,GSN,NFKBIB,MAP2K1
Semaphorin Signaling in Neurons	0.447	0.113	NaN	DPYSL2,ITGB1,RHOG,CFL1,RND3,NRP1
iCOS-iCOSL Signaling in T Helper Cells	0.446	0.104	3.317	IKBKB,Calm1 (includes others),CD40,HLA-A,HLA-DMA,HLA-DMB,HLA-DQA1,HLA-DQB1,NFKB2,NFKB1,NFKBIB,CD3D,HLA-DRB5
NGF Signaling	0.446	0.104	2.496	RAP2B,TP53,RAF1,MAP3K1,BAX,NFKB2,NFKB1,RAP1A,IKBKB,RHOG,PRKCD,RPS6KA4,MAP2K1
IL-15 Signaling	0.44	0.107	NaN	RAP2B,RAF1,VCAM1,TYK2,NFKB2,MAPK13,NFKB1,MAP2K1,RAP1A
CDK5 Signaling	0.435	0.105	0.632	ITGB1,RAP2B,RAF1,PPP1R3D,CAPN1,PPP2R5D,EGR1,MAPK13,PPP1CA,MAP2K1,RAP1A
Androgen Biosynthesis	0.429	0.143	NaN	EBP,HSD3B7
Phenylalanine Degradation IV (Mammalian, via Side Chain)	0.429	0.143	NaN	ALDH2,GOT2
Triacylglycerol Degradation	0.427	0.111	0.816	ABHD12,TARS2,DAGLB,MGLL,NDST1,AARSD1
Pyrimidine Ribonucleotides Interconversion	0.424	0.114	2.236	NUDT5,NME1,NUDT9,NME2,CMPK1
Osteoarthritis Pathway	0.423	0.0995	0.5	ITGB1,FN1,TNFRSF1A,CTNNA1,NFKB2,NFKB1,IL18RAP,IL1R2,CASP6,HDAC3,S100A9,CXCR2,ANXA5,CASP1,IL1B,S100A8,MYBBP1A,TNFRSF1B,CASP8,MMP9,P2RX7
Cysteine Biosynthesis III (mammalia)	0.421	0.125	NaN	PRMT3,MAT2A,AHCY
Trehalose Degradation II (Trehalase)	0.419	0.2	NaN	HK3
Protein Citrullination	0.419	0.2	NaN	PADI4
Creatine-phosphate Biosynthesis	0.419	0.2	NaN	CKB
2-ketoglutarate Dehydrogenase Complex	0.419	0.2	NaN	OGDH
Tetrapyrrole Biosynthesis II	0.419	0.2	NaN	HMBS
Myo-inositol Biosynthesis	0.419	0.2	NaN	ISYNA1
Trans, trans-farnesyl Diphosphate Biosynthesis	0.419	0.2	NaN	FDPS
Citrulline-Nitric Oxide Cycle	0.419	0.2	NaN	ASS1
dTMP De Novo Biosynthesis	0.419	0.2	NaN	SHMT2
Folate Polyglutamylation	0.419	0.2	NaN	SHMT2
IL-4 Signaling	0.416	0.104	NaN	RAP2B,IL13RA1,HLA-A,HLA-DMA,HLA-DMB,TYK2,HLA-DQA1,HLA-DQB1,RAP1A,HLA-DRB5
Cancer Drug Resistance By Drug Efflux	0.408	0.109	NaN	RAP2B,TP53,RAF1,NFKB1,MAP2K1,RAP1A
Role of Pattern Recognition Receptors in Recognition of Bacteria and Viruses	0.402	0.101	0	OAS1,NLRP3,C3,C5AR1,NFKB2,OAS3,EIF2S1,NFKB1,PRKCD,CASP1,MAVS,OSM,IL1B,C3AR1
IL-17A Signaling in Gastric Cells	0.393	0.12	NaN	JUN,MAPK13,NFKB1
Role of Oct4 in Mammalian Embryonic Stem Cell Pluripotency	0.382	0.109	NaN	TP53,CASP6,PHB,RARA,PARP1
Thyroid Cancer Signaling	0.382	0.109	NaN	MYC,RAP2B,TP53,MAP2K1,RAP1A
Pyrimidine Ribonucleotides De Novo Biosynthesis	0.382	0.109	2.236	NUDT5,NME1,NUDT9,NME2,CMPK1
Dermatan Sulfate Biosynthesis (Late Stages)	0.382	0.109	-1.342	CHST12,CHST13,NDST1,CHST15,DSE
Erythropoietin Signaling	0.381	0.102	NaN	RAP2B,RAF1,JUN,PRKCD,NFKB2,NFKB1,NFKBIB,MAP2K1,RAP1A
eNOS Signaling	0.369	0.0977	-1.387	Calm1 (includes others),HSPA14,Hspa1b,HSPA9,HSPA1A/HSPA1B,HSPA5,HSPA8,CCNA2,HSPA4,NOSIP,HSP90B1,LPAR6,HSP90AB1,STUB1,PRKCD,HSP90AA1,CASP8
NAD Salvage Pathway II	0.367	0.115	NaN	NT5E,NT5C,Acp5
UVB-Induced MAPK Signaling	0.365	0.103	1.633	TP53,JUN,H3F3A/H3F3B,PRKCD,MAPK13,MAP2K1,EIF4E
nNOS Signaling in Neurons	0.364	0.106	NaN	Calm1 (includes others),PRKCD,CAPN1,CAPN2,GRINA
Triacylglycerol Biosynthesis	0.364	0.106	-2.236	LPCAT2,AGPAT2,DGAT2,DGAT1,MBOAT7
Chondroitin Sulfate Degradation (Metazoa)	0.359	0.125	NaN	GM2A,HEXA
Selenocysteine Biosynthesis II (Archaea and Eukaryotes)	0.359	0.167	NaN	SARS
Rapoport-Luebering Glycolytic Shunt	0.359	0.167	NaN	MINPP1
Lactose Degradation III	0.359	0.167	NaN	PSAP
Cell Cycle Regulation by BTG Family Proteins	0.354	0.108	NaN	PPP2R5D,BTG2,BTG1,CDK4
Pancreatic Adenocarcinoma Signaling	0.354	0.0984	1.508	PLD4,TP53,RAF1,PA2G4,CDKN1A,TYK2,CDK4,NFKB2,NFKB1,BIRC5,MAP2K1,MMP9
Superpathway of Methionine Degradation	0.354	0.108	2	PRMT3,MAT2A,GOT2,AHCY
Lymphotoxin Î² Receptor Signaling	0.35	0.101	0.447	IKBKB,VCAM1,RELB,LTB,CYCS,NFKB2,NFKB1
CTLA4 Signaling in Cytotoxic T Lymphocytes	0.35	0.099	NaN	AP1S1,B2M,AP2M1,AP1G2,HLA-A,CLTA,PPP2R5D,CD3D,AP2A2,AP2S1
SAPK/JNK Signaling	0.346	0.0982	1.508	MAP4K2,RAP2B,TP53,TRADD,RAC2,JUN,GADD45A,MAP3K1,MAP4K1,RAP1A,HNRNPK
Type II Diabetes Mellitus Signaling	0.345	0.0968	2.111	TNFRSF1A,SOCS6,MAP3K1,PKM,NFKB2,NFKB1,ADIPOR1,SLC27A4,IKBKB,TRADD,PRKCD,ACSL5,TNFRSF1B,NFKBIB,ACSL1
Clathrin-mediated Endocytosis Signaling	0.344	0.0957	NaN	ITGB1,AP2M1,AP3M1,ARPC5L,NUMB,RAB5B,PCYOX1,AP2A2,AP2S1,ITGB7,HSPA8,AP1S1,ITGB2,ARRB2,AP1G2,TF,CLTA,RPS27A,S100A8,ACTG1
PTEN Signaling	0.343	0.0976	-1.732	ITGB1,RAP2B,RAF1,IKBKB,RAC2,YWHAH,CDKN1A,NFKB2,NFKB1,MCRS1,MAP2K1,RAP1A
IL-1 Signaling	0.341	0.0989	2.121	ECSIT,IKBKB,JUN,MAP3K1,NFKB2,MAPK13,NFKB1,NFKBIB,GNG10
Th17 Activation Pathway	0.341	0.0989	0.333	HSP90B1,HSP90AB1,BATF,IL6R,TYK2,IL1B,HSP90AA1,NFKB2,NFKB1
PKCÎ¸ Signaling in T Lymphocytes	0.333	0.0958	3	RAP2B,RAC2,HLA-A,MAP3K1,HLA-DQA1,HLA-DQB1,NFKB2,NFKB1,CD3D,RAP1A,IKBKB,JUN,HLA-DMA,HLA-DMB,NFKBIB,HLA-DRB5
Î±-Adrenergic Signaling	0.328	0.0978	1.134	RAP2B,RAF1,Calm1 (includes others),GYS1,PRKCD,PYGL,MAP2K1,RAP1A,GNG10
Dermatan Sulfate Degradation (Metazoa)	0.328	0.118	NaN	GM2A,HEXA
IL-15 Production	0.319	0.107	NaN	TYK2,NFKB2,NFKB1
BMP signaling pathway	0.318	0.0976	1.414	RAP2B,RAF1,JUN,MAPK13,NFKB2,NFKB1,MAP2K1,RAP1A
TGF-Î² Signaling	0.316	0.0968	1	RAP2B,RAF1,JUN,HDAC1,MAP4K1,MAPK13,MAP2K1,RAP1A,INHBA
Ceramide Biosynthesis	0.31	0.143	NaN	SPTSSA
Thioredoxin Pathway	0.31	0.143	NaN	TXN
IL-12 Signaling and Production in Macrophages	0.309	0.0946	NaN	IFNGR1,MAPK13,PCYOX1,NFKB2,NFKB1,IKBKB,JUN,CD40,PRKCD,S100A8,IRF8,REL,NFKBIB,MAP2K1
Thrombopoietin Signaling	0.307	0.0972	1.89	RAP2B,MYC,RAF1,JUN,PRKCD,MAP2K1,RAP1A
Endometrial Cancer Signaling	0.307	0.0972	0.816	RAP2B,MYC,TP53,RAF1,CTNNA1,RAP1A,MAP2K1
Ephrin B Signaling	0.307	0.0972	-0.447	RAC2,PXN,CFL1,CXCR4,CAP1,HNRNPK,GNG10
Amyloid Processing	0.296	0.098	-1	CAPN1,APH1A,CSNK1A1,CAPN2,MAPK13
GDNF Family Ligand-Receptor Interactions	0.293	0.0952	1.134	RAP2B,RAF1,PDLIM7,JUN,DOK3,DOK1,MAP2K1,RAP1A
T Cell Receptor Signaling	0.292	0.094	NaN	RAP2B,RAF1,IKBKB,JUN,Calm1 (includes others),MAP3K1,NFKB2,NFKB1,CD3D,MAP2K1,RAP1A
Non-Small Cell Lung Cancer Signaling	0.282	0.0941	0.816	RAP2B,TP53,RAF1,PA2G4,CDK4,MAP2K1,RAP1A,RASSF1
Tryptophan Degradation to 2-amino-3-carboxymuconate Semialdehyde	0.271	0.125	NaN	HAAO
Salvage Pathways of Pyrimidine Deoxyribonucleotides	0.271	0.125	NaN	TK1
Sphingomyelin Metabolism	0.271	0.125	NaN	SGMS2
Intrinsic Prothrombin Activation Pathway	0.264	0.0952	0	F10,PROS1,F5,F13A1
tRNA Splicing	0.264	0.0952	1	SMPDL3A,PDE2A,TSEN34,APEX1
Retinol Biosynthesis	0.264	0.0952	1	DHRS3,DHRS9,DHRS4,ESD
Estrogen-Dependent Breast Cancer Signaling	0.26	0.092	2.236	RAP2B,HSD17B10,JUN,HSD17B12,NFKB2,NFKB1,HSD17B4,RAP1A
Heparan Sulfate Biosynthesis (Late Stages)	0.258	0.0921	-0.378	EXT2,TARS2,CHST12,CHST13,NDST1,CHST15,AARSD1
Role of Hypercytokinemia/hyperchemokinemia in the Pathogenesis of Influenza	0.249	0.093	NaN	CCR1,IL36G,IL1RN,IL1B
Pathogenesis of Multiple Sclerosis	0.237	0.111	NaN	CCR1
Prostanoid Biosynthesis	0.237	0.111	NaN	PTGES3
Phosphatidylethanolamine Biosynthesis II	0.237	0.111	NaN	PCYT2
Leucine Degradation I	0.237	0.111	NaN	BCAT2
Glycine Betaine Degradation	0.21	0.1	NaN	SHMT2
Natural Killer Cell Signaling	0	0.0538	NaN	RAP2B,RAF1,RAC2,PRKCD,HCST,RAP1A,MAP2K1
Circadian Rhythm Signaling	0	0.0303	NaN	GRINA
Synaptic Long Term Potentiation	0	0.0794	1.265	RAP2B,RAF1,PPP1R3D,Calm1 (includes others),PDIA3,PRKCD,PPP1CA,MAP2K1,RAP1A,GRINA
Axonal Guidance Signaling	0	0.0783	NaN	RAP2B,DPYSL2,RAC2,KLC1,RAF1,TUBA1B,PFN1,PDIA3,MMP25,TUBB,BRCC3,EIF4E,ADAM8,TUBA8,MMP8,NTNG2,PSMD14,PLXNB2,MAP2K1,VASP,MYL12A,ITGB1,PXN,CFL1,ARPC5L,CXCR4,ADAM15,TUBB4B,COPS5,TUBG1,TUBB2A,RAP1A,GNG10,TUBA1A,TUBB6,PRKCD,ADAM9,MMP9,NRP1
Fc Epsilon RI Signaling	0	0.0551	0.378	RAP2B,RAF1,RAC2,PRKCD,MAPK13,RAP1A,MAP2K1
Actin Cytoskeleton Signaling	0	0.0779	0.5	RAP2B,ITGB1,RAC2,RAF1,PXN,PFN1,FN1,MYH9,CFL1,ARPC5L,GSN,IQGAP1,RAP1A,CYFIP2,CD14,MAP2K1,ACTG1,MYL12A
Synaptic Long Term Depression	0	0.0591	0.632	RAP2B,PLBD1,RAF1,PDIA3,PRKCD,PPP2R5D,PLA2G7,MAP2K1,RAP1A,PAFAH1B3,SLC39A7
FXR/RXR Activation	0	0.0794	NaN	IL36G,C3,TF,SCARB1,CYP27A1,IL1RN,RARA,IL1B,PCYOX1,PLTP
PXR/RXR Activation	0	0.0154	NaN	PAPSS2
TR/RXR Activation	0	0.09	NaN	F10,ENO1,HP,SLC16A3,UCP2,HDAC3,SCARB1,GPS2,NCOA4
RAR Activation	0	0.0895	NaN	DHRS3,RELB,MAP3K1,MAPK13,NFKB2,RPL7A,NFKB1,PSMC5,PARP1,JUN,DHRS9,DUSP1,RARA,PRKCD,SMARCB1,REL,MAP2K1
FcÎ³RIIB Signaling in B Lymphocytes	0	0.0345	NaN	RAP2B,DOK1,RAP1A
CCR5 Signaling in Macrophages	0	0.0745	1	Calm1 (includes others),JUN,PRKCD,MAPK13,CD3D,FAS,GNG10
IL-22 Signaling	0	0.0833	NaN	TYK2,MAPK13
IL-3 Signaling	0	0.0667	1.633	RAP2B,RAF1,JUN,PRKCD,MAP2K1,RAP1A
IL-17 Signaling	0	0.0645	NaN	RAP2B,JUN,MAPK13,NFKB1,MAP2K1,RAP1A
CXCR4 Signaling	0	0.0814	0	RAP2B,RAF1,PXN,CXCR4,EGR1,RAP1A,GNG10,RHOG,JUN,RND3,PRKCD,ELMO2,MAP2K1,MYL12A
IL-9 Signaling	0	0.0426	NaN	NFKB2,NFKB1
CCR3 Signaling in Eosinophils	0	0.0657	0.816	RAP2B,RAF1,Calm1 (includes others),CFL1,PRKCD,MAPK13,MAP2K1,RAP1A,GNG10
Role of Cytokines in Mediating Communication between Immune Cells	0	0.0556	NaN	IL36G,IL1RN,IL1B
Reelin Signaling in Neurons	0	0.0851	NaN	ITGB1,ITGB2,NDEL1,ITGA1,MAP4K1,ITGAL,FGR,PAFAH1B3
Melatonin Signaling	0	0.0694	2	RAF1,Calm1 (includes others),PDIA3,PRKCD,MAP2K1
Angiopoietin Signaling	0	0.0814	1.134	RAP2B,IKBKB,NFKB2,NFKBIB,NFKB1,BIRC5,RAP1A
Cellular Effects of Sildenafil (Viagra)	0	0.0458	NaN	PDE2A,Calm1 (includes others),MYH9,PDIA3,ACTG1,MYL12A
Neuropathic Pain Signaling In Dorsal Horn Neurons	0	0.0342	0	CAMK1,PDIA3,PRKCD,GRINA
Endothelin-1 Signaling	0	0.0854	1.5	PLD4,MYC,PLBD1,RAP2B,CASP6,RAF1,JUN,PDIA3,PRKCD,CASP1,EDNRA,ECE1,MAPK13,CASP8,PLA2G7,RAP1A,PAFAH1B3
Relaxin Signaling	0	0.0736	1.134	SMPDL3A,PDE2A,JUN,NFKB2,NFKB1,NFKBIB,MAP2K1,RAP1A,APEX1,MMP9,GNG10,SLC39A7
Factors Promoting Cardiogenesis in Vertebrates	0	0.0109	NaN	PRKCD
CNTF Signaling	0	0.0845	1.633	RAP2B,RAF1,TYK2,RPS6KA4,MAP2K1,RAP1A
Renin-Angiotensin Signaling	0	0.0769	1.897	RAP2B,RAF1,JUN,PRKCD,MAP3K1,NFKB2,MAPK13,NFKB1,MAP2K1,RAP1A
Docosahexaenoic Acid (DHA) Signaling	0	0.0741	NaN	IL1B,BID,CYCS,BAX
Thrombin Signaling	0	0.0711	1.387	RAP2B,RAF1,CAMK1,PDIA3,MAPK13,NFKB2,NFKB1,RAP1A,GNG10,IKBKB,RHOG,RND3,PRKCD,MAP2K1,MYL12A
Cardiac Hypertrophy Signaling	0	0.0702	1	RAP2B,RAF1,Calm1 (includes others),PDIA3,MAP3K1,IL6R,MAPK13,EIF2B2,RAP1A,EIF4E,GNG10,JUN,RHOG,RND3,EIF2B1,MAP2K1,MYL12A
Molecular Mechanisms of Cancer	0	0.0838	NaN	RAP2B,RAC2,RAF1,PA2G4,CTNNA1,CDK4,MAPK13,NFKB1,FAS,MYC,CASP6,RHOG,JUN,CCND3,BID,CASP8,NFKBIB,MAP2K1,ITGB1,TP53,HAT1,TYK2,AURKA,BAX,NFKB2,RAP1A,CDKN2D,MAX,RND3,APH1A,PRKCD,CDKN1A,CYCS
Corticotropin Releasing Hormone Signaling	0	0.0559	0.447	RAF1,Calm1 (includes others),JUN,PRKCD,MAPK13,MAP2K1,RAP1A,SLC39A7
HGF Signaling	0	0.0826	1.265	ITGB1,RAP2B,RAF1,PXN,JUN,PRKCD,MAP3K1,CDKN1A,MAP2K1,RAP1A
FLT3 Signaling in Hematopoietic Progenitor Cells	0	0.0761	1.134	RAP2B,RAF1,RPS6KA4,MAPK13,MAP2K1,RAP1A,EIF4E
GNRH Signaling	0	0.0765	0	RAP2B,RAF1,PXN,Calm1 (includes others),EGR1,MAP3K1,MAPK13,NFKB2,NFKB1,RAP1A,JUN,PRKCD,MAP2K1
Human Embryonic Stem Cell Pluripotency	0	0.0069	NaN	INHBA
Melanocyte Development and Pigmentation Signaling	0	0.0476	1.342	RAP2B,RAF1,RPS6KA4,MAP2K1,RAP1A
Antiproliferative Role of Somatostatin Receptor 2	0	0.069	1	RAP2B,CDKN1A,MAP2K1,RAP1A,SLC39A7,GNG10
Role of NANOG in Mammalian Embryonic Stem Cell Pluripotency	0	0.0462	0.816	RAP2B,TP53,RAF1,TYK2,MAP2K1,RAP1A
Growth Hormone Signaling	0	0.0349	NaN	PRKCD,SOCS6,RPS6KA4
Prolactin Signaling	0	0.0879	1.414	RAP2B,MYC,RAF1,JUN,PRKCD,SOCS6,MAP2K1,RAP1A
CREB Signaling in Neurons	0	0.0685	1.89	POLR2I,RAP2B,RAF1,POLR2F,Calm1 (includes others),POLR2D,PDIA3,POLR2J,POLR2H,RAP1A,GNG10,POLR2C,POLR2E,PRKCD,MAP2K1
Renal Cell Carcinoma Signaling	0	0.0778	1.342	RAP2B,RAF1,JUN,RPS27A,FH,MAP2K1,RAP1A
Basal Cell Carcinoma Signaling	0	0.0139	NaN	TP53
Primary Immunodeficiency Signaling	0	0.06	NaN	CD40,TNFRSF13B,CD3D
GÎ±12/13 Signaling	0	0.0909	1.732	RAP2B,RAF1,IKBKB,LPAR6,PXN,JUN,MAP3K1,NFKB2,NFKB1,NFKBIB,MAP2K1,RAP1A,MYL12A
Colorectal Cancer Metastasis Signaling	0	0.0784	1.147	RAP2B,TP53,TNFRSF1A,TYK2,IL6R,IFNGR1,BAX,NFKB2,NFKB1,MMP25,RAP1A,BIRC5,GNG10,MYC,JUN,RHOG,RND3,MMP8,MAP2K1,MMP9
Cleavage and Polyadenylation of Pre-mRNA	0	0.0833	NaN	NUDT21
G Beta Gamma Signaling	0	0.042	1.342	RAP2B,RAF1,PRKCD,RAP1A,GNG10
G Protein Signaling Mediated by Tubby	0	0.0323	NaN	GNG10
Sphingosine-1-phosphate Signaling	0	0.0635	-0.816	CASP6,RHOG,ACER3,RND3,PDIA3,CASP1,CASP8,ASAH1
FAK Signaling	0	0.0841	NaN	ITGB1,RAP2B,RAF1,PXN,CAPN1,CAPN2,ACTG1,MAP2K1,RAP1A
AMPK Signaling	0	0.0548	-1.897	CCNA2,RAB27A,GYS1,EEF2,PPP2R5D,CDKN1A,SMARCB1,MAPK13,PFKL,MLST8,PPM1G,RAB6A
PAK Signaling	0	0.0734	0.378	RAP2B,ITGB1,RAF1,PXN,CFL1,MAP2K1,RAP1A,MYL12A
RhoA Signaling	0	0.0813	0	LPAR6,SEPT5,PFN1,CFL1,RND3,ARPC5L,ACTG1,SEPT1,SEPT2,MYL12A
Role of Osteoblasts, Osteoclasts and Chondrocytes in Rheumatoid Arthritis	0	0.0766	NaN	ITGB1,Calm1 (includes others),TNFRSF1A,CSNK1A1,GSN,NFKB1,CSF1R,IL18RAP,IL1R2,TRADD,IKBKB,IL36G,JUN,IL1RN,MMP8,IL1B,TNFRSF1B,NFKBIB
Phospholipase C Signaling	0	0.0779	2.324	RAP2B,ITGB1,PEBP1,RAF1,Calm1 (includes others),HDAC1,NFKB2,NFKB1,CD3D,RAP1A,GNG10,PLD4,HDAC3,RHOG,RND3,AHNAK,PRKCD,MAP2K1,MYL12A
Ovarian Cancer Signaling	0	0.0662	0.378	RAP2B,TP53,RAF1,PA2G4,CDK4,CD44,EDNRA,MAP2K1,RAP1A,MMP9
HER-2 Signaling in Breast Cancer	0	0.0833	NaN	RAP2B,ITGB1,TP53,ITGB2,PRKCD,CDKN1A,RAP1A,ITGB7
Leptin Signaling in Obesity	0	0.0227	NaN	PDIA3,MAP2K1
Role of NFAT in Cardiac Hypertrophy	0	0.0619	1.265	RAP2B,RAF1,Calm1 (includes others),CAMK1,PDIA3,HDAC1,MAP3K1,CSNK1A1,MAPK13,RAP1A,GNG10,HDAC3,PRKCD,MAP2K1
Glioma Invasiveness Signaling	0	0.0897	-0.378	RAP2B,RHOG,RND3,CD44,PLAUR,RAP1A,MMP9
Glioblastoma Multiforme Signaling	0	0.0706	0.905	MYC,RAP2B,TP53,RAF1,RHOG,RND3,PDIA3,PRKCD,CDKN1A,CDK4,MAP2K1,RAP1A
Neuroprotective Role of THOP1 in Alzheimer's Disease	0	0.075	0	HLA-G,PREP,PRSS57,YWHAE,HLA-A,PRTN3,ECE1,HLA-E,MMP9
Role of Wnt/GSK-3Î² Signaling in the Pathogenesis of Influenza	0	0.039	NaN	CSNK1A1,IFNAR1,NCOA4
Role of Lipids/Lipid Rafts in the Pathogenesis of Influenza	0	0.087	NaN	FDPS,IFNAR1
Role of PI3K/AKT Signaling in the Pathogenesis of Influenza	0	0.075	1.342	NFKB2,NFKB1,NFKBIB,MAP2K1,PLAC8,IFNAR1
MSP-RON Signaling Pathway	0	0.0541	NaN	ITGB2,ITGAM,CCR2,ACTG1
P2Y Purigenic Receptor Signaling Pathway	0	0.0857	2.714	MYC,RAP2B,RAF1,JUN,PDIA3,PRKCD,P2RY6,NFKB2,NFKB1,MAP2K1,RAP1A,GNG10
DNA Double-Strand Break Repair by Homologous Recombination	0	0.0714	NaN	RPA1
Assembly of RNA Polymerase III Complex	0	0.0769	NaN	GTF3A
DNA Double-Strand Break Repair by Non-Homologous End Joining	0	0.0714	NaN	PARP1
IL-17A Signaling in Airway Cells	0	0.0875	1.134	IKBKB,TYK2,NFKB2,MAPK13,NFKB1,NFKBIB,MAP2K1
Role of IL-17A in Arthritis	0	0.0714	NaN	NFKB2,MAPK13,NFKB1,NFKBIB,MAP2K1
Differential Regulation of Cytokine Production in Macrophages and T Helper Cells by IL-17A and IL-17F	0	0.0556	NaN	IL1B
Differential Regulation of Cytokine Production in Intestinal Epithelial Cells by IL-17A and IL-17F	0	0.087	NaN	LCN2,IL1B
Role of JAK2 in Hormone-like Cytokine Signaling	0	0.0882	NaN	TYK2,SOCS6,SIRPA
Role of JAK1 and JAK3 in Î³c Cytokine Signaling	0	0.0256	NaN	RAP2B,RAP1A
Dopamine-DARPP32 Feedback in cAMP Signaling	0	0.0491	1.414	PPP1R3D,Calm1 (includes others),PDIA3,PRKCD,PPP2R5D,CSNK1A1,PPP1CA,GRINA
Paxillin Signaling	0	0.0909	0.816	ITGB1,RAP2B,ITGB2,PXN,ITGAM,ITGA1,MAPK13,ITGAL,ACTG1,RAP1A,ITGB7
Signaling by Rho Family GTPases	0	0.0794	0.471	ITGB1,RAF1,SEPT5,CFL1,ARPC5L,VIM,NFKB2,NFKB1,IQGAP1,SEPT1,GNG10,STMN1,JUN,RHOG,RND3,CYBB,MAP2K1,ACTG1,SEPT2,MYL12A
RhoGDI Signaling	0	0.0743	0	ITGB1,GDI1,CFL1,ARPC5L,GDI2,ARHGDIB,GNG10,RHOG,RND3,CD44,ARHGDIA,ACTG1,MYL12A
Gap Junction Signaling	0	0.0817	NaN	RAP2B,TUBA1B,RAF1,PDIA3,TUBB4B,TUBB2A,TUBG1,CSNK1A1,TUBB,RAP1A,TUBA1A,TUBA8,TUBB6,PRKCD,MAP2K1,ACTG1,SLC39A7
Telomere Extension by Telomerase	0	0.0667	NaN	HNRNPA2B1
Mouse Embryonic Stem Cell Pluripotency	0	0.0702	0.707	RAP2B,MYC,TP53,RAF1,TYK2,MAPK13,RAP1A,MAP2K1
Hematopoiesis from Pluripotent Stem Cells	0	0.0204	NaN	CD3D
Transcriptional Regulatory Network in Embryonic Stem Cells	0	0.0556	NaN	SET,HIST1H4A,H3F3A/H3F3B
nNOS Signaling in Skeletal Muscle Cells	0	0.0244	NaN	Calm1 (includes others)
VEGF Family Ligand-Receptor Interactions	0	0.0625	1.342	RAP2B,RAF1,PRKCD,MAP2K1,RAP1A,NRP1
Ephrin A Signaling	0	0.0161	NaN	CFL1
ErbB Signaling	0	0.066	1.134	RAP2B,RAF1,JUN,PRKCD,MAPK13,MAP2K1,RAP1A
ErbB2-ErbB3 Signaling	0	0.0909	1.633	MYC,RAP2B,RAF1,JUN,TYK2,MAP2K1,RAP1A
ErbB4 Signaling	0	0.075	1.342	RAP2B,RAF1,PRKCD,APH1A,MAP2K1,RAP1A
Netrin Signaling	0	0.0154	NaN	RAC2
Heparan Sulfate Biosynthesis	0	0.0843	-0.378	EXT2,TARS2,CHST12,CHST13,NDST1,CHST15,AARSD1
Retinoate Biosynthesis I	0	0.0882	NaN	DHRS3,DHRS9,DHRS4
Thyroid Hormone Metabolism II (via Conjugation and/or Degradation)	0	0.0465	NaN	EXT2,Ugt1a7c
NAD biosynthesis II (from tryptophan)	0	0.0667	NaN	HAAO
Nicotine Degradation III	0	0.0357	NaN	EXT2,Ugt1a7c
Ubiquinol-10 Biosynthesis (Eukaryotic)	0	0.0556	NaN	BCKDHA
Acyl-CoA Hydrolysis	0	0.0833	NaN	ACOT7
Melatonin Degradation I	0	0.0308	NaN	EXT2,Ugt1a7c
D-myo-inositol (1,4,5)-Trisphosphate Biosynthesis	0	0.037	NaN	PLD4
Phospholipases	0	0.0794	0.447	PLD4,PLBD1,PDIA3,PLA2G7,PAFAH1B3
Choline Biosynthesis III	0	0.0769	NaN	PLD4
Estrogen Biosynthesis	0	0.0732	NaN	HSD17B10,HSD17B12,HSD17B4
Oleate Biosynthesis II (Animals)	0	0.0769	NaN	UFSP2
Chondroitin Sulfate Biosynthesis	0	0.0702	-2	CHST12,CHST13,NDST1,CHST15
Dermatan Sulfate Biosynthesis	0	0.0847	-1.342	CHST12,CHST13,NDST1,CHST15,DSE
Nicotine Degradation II	0	0.0308	NaN	EXT2,Ugt1a7c
Superpathway of Inositol Phosphate Compounds	0	0.0759	3.3	MINPP1,PPP2R5D,NUDT9,MDP1,NUDT14,IGBP1,NT5C,PLD4,NUDT5,SET,ATP1A1,PTPRO,DUSP1,DUSP12,PPP1CA,NUDT4,PPP5C,SIRPA
Superpathway of D-myo-inositol (1,4,5)-trisphosphate Metabolism	0	0.0435	NaN	MINPP1
D-myo-inositol (1,3,4)-trisphosphate Biosynthesis	0	0.0556	NaN	MINPP1
3-phosphoinositide Biosynthesis	0	0.0842	3.153	MINPP1,PPP2R5D,NUDT9,MDP1,NUDT14,IGBP1,NT5C,NUDT5,SET,ATP1A1,DUSP1,PTPRO,DUSP12,PPP1CA,NUDT4,PPP5C,SIRPA
Chondroitin Sulfate Biosynthesis (Late Stages)	0	0.0816	-2	CHST12,CHST13,NDST1,CHST15
Superpathway of Melatonin Degradation	0	0.0286	NaN	EXT2,Ugt1a7c
Acetone Degradation I (to Methylglyoxal)	0	0.0333	NaN	FAM213B
GÎ±i Signaling	0	0.0738	-2.121	RAP2B,RAF1,LTB4R,CXCR2,RGS10,FPR2,RAP1A,GNG10,FPR1
GÎ±q Signaling	0	0.0802	2.111	PLD4,RAF1,IKBKB,RHOG,Calm1 (includes others),GYS1,RND3,PRKCD,NFKB2,NFKB1,NFKBIB,MAP2K1,GNG10
GÎ±s Signaling	0	0.0374	NaN	ADORA2B,MAP2K1,RAP1A,GNG10
Inhibition of Matrix Metalloproteases	0	0.0769	NaN	MMP8,MMP25,MMP9
Regulation of the Epithelial-Mesenchymal Transition Pathway	0	0.0558	NaN	RAP2B,RAF1,EGR1,APH1A,ZEB2,TYK2,NFKB2,NFKB1,MAP2K1,RAP1A,MMP9
Role of p14/p19ARF in Tumor Suppression	0	0.0667	NaN	TP53,NPM1,NPM3
Sperm Motility	0	0.0625	0.378	PLBD1,SLC16A10,PDE2A,Calm1 (includes others),PDIA3,PRKCD,PLA2G7,PAFAH1B3
Tec Kinase Signaling	0	0.0643	1.265	ITGB1,RHOG,RND3,PRKCD,TYK2,NFKB2,NFKB1,ACTG1,FGR,FAS,GNG10
UVA-Induced MAPK Signaling	0	0.0885	2	RAP2B,TP53,JUN,PDIA3,PARP2,CYCS,RPS6KA4,MAPK13,RAP1A,PARP1
Adipogenesis pathway	0	0.0821	NaN	TP53,HDAC3,TXNIP,HAT1,TNFRSF1A,AGPAT2,HDAC1,CEBPD,XBP1,RBBP7,BSCL2
PCP pathway	0	0.0492	NaN	JUN,PFN1,JUNB
Wnt/Ca+ pathway	0	0.0484	NaN	PDIA3,NFKB2,NFKB1
EGF Signaling	0	0.0714	0.447	RAF1,JUN,MAP3K1,MAPK13,MAP2K1
Nitric Oxide Signaling in the Cardiovascular System	0	0.0696	2.646	HSP90B1,PDE2A,Calm1 (includes others),HSP90AB1,PRKCD,HSP90AA1,ARG2,MAP2K1
Cardiac Î²-adrenergic Signaling	0	0.0571	-0.378	SMPDL3A,PPP1R3D,PDE2A,PPP2R5D,PPP1CA,APEX1,PKIG,GNG10
IL-2 Signaling	0	0.0694	1	RAP2B,RAF1,JUN,MAP2K1,RAP1A
FGF Signaling	0	0.0435	0	RAF1,MAP3K1,MAPK13,MAP2K1
GABA Receptor Signaling	0	0.0737	NaN	NSF,AP2M1,AP1G2,RPS27A,AP2A2,AP2S1,ALDH9A1
B Cell Receptor Signaling	0	0.0825	1.5	RAP2B,RAF1,RAC2,Calm1 (includes others),CFL1,EGR1,MAP3K1,MAPK13,NFKB2,NFKB1,BCL6,RAP1A,IKBKB,JUN,NFKBIB,MAP2K1
Wnt/Î²-catenin Signaling	0	0.0698	0.302	MYC,TP53,JUN,RARA,PPP2R5D,HDAC1,CSNK1A1,CD44,RPS27A,RUVBL2,MAP4K1,SOX13
Serotonin Receptor Signaling	0	0.0465	NaN	SPR,QDPR
Insulin Receptor Signaling	0	0.068	1.265	RAP2B,RAF1,PPP1R3D,GYS1,EIF2B1,PPP1CA,MAP2K1,EIF2B2,RAP1A,EIF4E
Phototransduction Pathway	0	0.0189	NaN	GNGT2
Neurotrophin/TRK Signaling	0	0.0595	1.342	RAP2B,RAF1,JUN,MAP2K1,RAP1A
Sonic Hedgehog Signaling	0	0.0667	NaN	ARRB2,CCNB1
Dopamine Receptor Signaling	0	0.0779	NaN	PPP1R3D,PPP2R5D,COMT,SPR,PPP1CA,QDPR
cAMP-mediated signaling	0	0.0705	-0.5	SMPDL3A,RAF1,PDE2A,Calm1 (includes others),CAMK1,FPR2,RAP1A,FPR1,LTB4R,DUSP1,CXCR2,RGS10,ADORA2B,MAP2K1,APEX1,PKIG
Glutamate Receptor Signaling	0	0.0351	NaN	Calm1 (includes others),GRINA
Notch Signaling	0	0.0526	NaN	APH1A,NUMB
G-Protein Coupled Receptor Signaling	0	0.0636	NaN	SMPDL3A,RAP2B,RAF1,PDE2A,FPR2,NFKB2,NFKB1,RAP1A,FPR1,IKBKB,LTB4R,DUSP1,CXCR2,RGS10,ADORA2B,NFKBIB,MAP2K1,APEX1
PDGF Signaling	0	0.0816	2.121	RAP2B,MYC,RAF1,JUN,MAP3K1,TYK2,MAP2K1,RAP1A
GPCR-Mediated Integration of Enteroendocrine Signaling Exemplified by an L Cell	0	0.0137	NaN	PDIA3
GPCR-Mediated Nutrient Sensing in Enteroendocrine Cells	0	0.0357	1	PDIA3,PRKCD,FFAR2,GNG10
Gustation Pathway	0	0.0455	NaN	SMPDL3A,PDE2A,LPAR6,P2RY6,P2RX4,APEX1,P2RX7
Phagosome Formation	0	0.0909	NaN	ITGB1,ITGB2,RHOG,ITGAM,FN1,C5AR1,MSR1,RND3,PDIA3,PRKCD,FCGR1A,C3AR1
Macropinocytosis Signaling	0	0.0899	2	RAP2B,ITGB1,ITGB2,PRKCD,CD14,RAP1A,CSF1R,ITGB7
GP6 Signaling Pathway	0	0.0222	NaN	RHOG,Calm1 (includes others),PRKCD
IL-7 Signaling Pathway	0	0.0645	-1.342	MYC,JUN,CCND3,BAX,MAPK13,BCL6
Opioid Signaling Pathway	0	0.0894	1.528	RAP2B,SIGMAR1,RAC2,RAF1,AP2M1,CAMK1,Calm1 (includes others),NFKB2,NFKB1,AP2A2,RAP1A,AP2S1,GRINA,MYC,ARRB2,AP1G2,PRKCD,CLTA,RGS10,RPS6KA4,MAP2K1,FGR
Adrenomedullin signaling pathway	0	0.087	1.213	RAP2B,CRCP,RAF1,Calm1 (includes others),C3,PDIA3,BAX,MAPK13,NFKB2,NFKB1,RAP1A,IL36G,MAX,IL1RN,IL1B,CFH,MAP2K1,SLC39A7
SPINK1 Pancreatic Cancer Pathway	0	0.0333	NaN	CTSA,CTSB
SPINK1 General Cancer Pathway	0	0.0854	1.134	RAP2B,RAF1,IL6R,TYK2,RAP1A,MAP2K1,Mt1
Endocannabinoid Developing Neuron Pathway	0	0.0625	0	RAP2B,RAF1,RAC2,MGLL,MAPK13,RAP1A,MAP2K1,MLST8
Endocannabinoid Cancer Inhibition Pathway	0	0.0823	1.387	MYC,RAF1,CASP6,ATF3,CCND3,CDKN1A,CASP1,NUPR1,VIM,CASP8,MAP2K1,MLST8,EIF2A
Apelin Pancreas Signaling Pathway	0	0.0339	NaN	NFKB2,NFKB1
Apelin Liver Signaling Pathway	0	0.0385	NaN	FAS
Apelin Cardiomyocyte Signaling Pathway	0	0.0435	0.447	PDIA3,PRKCD,CAT,MAPK13,MYL12A
Apelin Endothelial Signaling Pathway	0	0.0866	2.111	RAP2B,RAF1,VCAM1,JUN,Calm1 (includes others),ICAM1,PRKCD,NFKB2,NFKB1,MAP2K1,RAP1A
Calcium Signaling	0	0.0631	0.816	RAP2B,CALR,HDAC3,MYH9,Calm1 (includes others),LETM1,CAMK1,ATP2B1,HDAC1,Tpm1,MCU,RAP1A,GRINA
GM-CSF Signaling	0	0.0494	1	RAP2B,RAF1,RAP1A,MAP2K1
Ephrin Receptor Signaling	0	0.0791	0	RAP2B,ITGB1,RAF1,RAC2,PXN,CFL1,ARPC5L,CXCR4,SH2D3C,RAP1A,GNG10,GRINA,DOK1,MAP2K1

## Sheet: C2 vs All
Supplementary Table 6b: Ingenuity Pathway Analysis of Cluster 2 macrophages compared to all non-cluster 2 macrophages
Ingenuity Canonical Pathways	-log(p-value)	Ratio	z-score	Molecules
EIF2 Signaling	50.7	0.454	5.907	RAP2B,RAF1,EIF3C,RPL39,RPLP2,RPL35A,EIF2A,RPS11,RPS2,EIF1AY,PABPC1,RPL10A,RPS6,PTBP1,PPP1R15A,RPL10,RPL6,RPS25,RPL41,EIF3K,RPL24,Rpl36a,RPS18,Rpl22l1,RPL26,EIF2B2,RPL7,EIF4E,RPL35,RPS9,EIF3A,RPS12,RPS5,RPL31,RPL18,RPS24,RPS19,RPL4,EIF3H,RPL17,RPS10,EIF3G,RPS16,EIF4A1,EIF2B1,RPS27A,RPL37,EIF1AX,RPS14,RPL11,RPL22,RPS23,HSPA5,RPS7,MYC,RPL13,RPS20,EIF3D,RPS13,RPL19,RPL21,PPP1CA,ATF3,RPL36AL,RPL3,RPS8…
Oxidative Phosphorylation	39	0.578	7.937	NDUFA9,ATP5F1D,NDUFB5,COX8A,ATP5MG,NDUFB8,NDUFA1,NDUFB3,NDUFB10,NDUFA5,NDUFS6,UQCRFS1,NDUFA10,ATP5PB,ATP5MC3,ATP5PF,ATP5MC2,NDUFS7,ATP5F1A,ATP5PO,UQCR11,SDHC,ATP5F1C,NDUFB11,ATP5F1B,NDUFA6,UQCRC2,NDUFA12,NDUFS3,NDUFB2,NDUFA4,COX7B,SDHB,ATP5MC1,ATP5PD,Cox6c,COX6A1,NDUFA2,Atp5e,NDUFB9,ATP5MF,NDUFS2,NDUFB6,NDUFAB1,COX4I1,SDHA,NDUFV1,COX6B1,NDUFB4,COX7A2L,NDUFA13,UQCRB,NDUFV2,NDUFS8,UQCR10,CYC1,COX7A…
Mitochondrial Dysfunction	37.3	0.45	NaN	NDUFA9,ATP5F1D,NDUFB5,COX8A,ACO2,ATP5MG,NDUFB8,NDUFA1,NDUFB3,NDUFB10,VDAC2,NDUFA5,NDUFS6,NDUFA10,UQCRFS1,ATP5PB,ATP5MC3,ATP5PF,ATP5MC2,NDUFS7,ATP5F1A,ATP5PO,SDHC,UQCR11,ATP5F1C,PRDX3,NDUFB11,ATP5F1B,NDUFA6,APH1A,TXN2,UQCRC2,NDUFA12,NDUFS3,VDAC1,NDUFB2,HSD17B10,NDUFA4,ATP5MC1,SDHB,COX7B,ATP5PD,Cox6c,COX6A1,PRDX5,NDUFA2,Atp5e,NDUFB9,PARK7,ATP5MF,NDUFB6,NDUFS2,OGDH,CASP8,NDUFAB1,COX4I1,SDHA,NDUFV1,C…
Sirtuin Signaling Pathway	25.5	0.295	-3.266	TUBA1B,POLR2F,TIMM13,GABARAPL2,NDUFA9,ATP5F1D,NDUFB5,TIMM50,ARG2,NDUFB8,NDUFA1,NDUFB3,VDAC2,NDUFB10,MYC,NDUFA5,XPC,NDUFS6,NDUFA10,UQCRFS1,ATP5PB,APEX1,TP53,PGK1,ATP5PF,NDUFS7,ATP5F1A,SDHC,STAT3,TIMM17A,ATP5F1C,ACADL,NDUFB11,H3F3A/H3F3B,ATP5F1B,NDUFA6,UQCRC2,NDUFA12,IDH2,H1F0,NDUFS3,VDAC1,NDUFB2,TOMM40,NDUFA4,HIST1H1C,ATP5MC1,SDHB,NDUFA2,NDUFB9,JUN,GADD45A,TUBA8,PGAM1,NDUFB6,NDUFS2,MAP1LC3B,GOT2,N…
Regulation of eIF4 and p70S6K Signaling	21.6	0.352	0	RAP2B,RAF1,EIF3C,RPS23,MAPK13,RPS11,EIF2A,RPS7,RPS20,EIF3D,RPS13,RPS2,EIF1AY,PABPC1,RPS8,EIF2S3,EIF3E,EIF2S2,EIF3M,RPS6,EIF4A3,RPS25,RPS15A,RPSA,EIF3K,RPS18,EIF2S1,EIF2B2,EIF4E,RPS28,RPS9,EIF3A,RPS17,RPS3,RPS5,RPS12,RPS24,RPS19,EIF3H,PPP2R5D,RPS10,RPS21,RPS29,FAU,EIF3G,EIF3F,RPS15,RPS4Y1,RPS16,RPS26,EIF4A1,RPS27L,EIF2B1,EIF3I,RPS27A,EIF1AX,EIF3L,RPS14
Protein Ubiquitination Pathway	16.2	0.251	NaN	FZR1,UBE2A,USP5,PSMA7,HSPA1A/HSPA1B,TRAP1,PSMB8,DNAJC15,HSPA5,PSMC5,HSPA4,UBE2B,PSMA2,PSMC2,PSMA6,PSMB5,DNAJC9,DNAJC19,HSPA9,PSMC4,PSME2,PSMD5,PSMD6,PSMD3,HSPA8,PSMD11,PSMB7,UBE2L3,PSMB2,PSMA5,PSMD12,PSMB1,PSMA4,ANAPC5,HSP90AA1,PSMD1,PSMD4,UBE2I,UBE2C,PSMB3,CDC20,PSMD7,HLA-A,PSMB10,UBE2F,HSP90B1,HSP90AB1,STUB1,PSMC6,UBE2V1,HSPE1,PSMA3,PSMD14,PSMB4,PSMB9,PSMD13,PSMA1,HSPD1,PSMB6,PSMD8,DNAJC11,PSME…
mTOR Signaling	13.6	0.26	1.508	RAP2B,EIF3C,RPS23,RPS11,RPS7,RHOG,RPS20,EIF3D,RPS13,RPS2,EIF4B,RPS8,EIF3E,MLST8,EIF3M,RPS6,RND3,EIF4A3,RPS25,RPS15A,RPSA,EIF3K,RPS18,FKBP1A,EIF4E,RPS28,RPS9,EIF3A,RPS17,RPS5,RPS12,RPS3,RPS24,RPS19,EIF3H,PPP2R5D,RPS10,RPS21,RPS29,FAU,EIF3G,PLD4,EIF3F,RPS15,RPS4Y1,RPS16,RPS26,EIF4A1,RPS27L,EIF3I,RPS27A,RPS6KA4,EIF3L,RPS14
Phagosome Maturation	9.65	0.257	NaN	TUBA1B,ATP6V0B,PRDX1,ATP6V1C1,HLA-A,PRDX5,RAB5B,TUBB,DYNLT1,CTSV,CTSZ,NSF,TUBA8,CTSH,CTSS,CYBB,LAMP1,M6PR,CALR,VPS16,TUBB4B,VPS41,TUBG1,VPS33A,TUBB2A,CANX,ATP6V1A,GPAA1,CTSA,TUBA1A,TUBB6,NCF2,CTSB,GOSR2,CTSC,ATP6V1B2,HLA-DRB5,PRDX2
TCA Cycle II (Eukaryotic)	9.19	0.583	3.742	SDHA,SDHB,IDH3G,ACO2,SDHC,MDH1,SUCLA2,CS,SUCLG1,SDHD,IDH3A,OGDH,FH,IDH3B
NER Pathway	8.52	0.282	1.8	COPS4,POLR2F,POLR2D,HMGN1,POLR2J,POLD4,HIST1H4A,POLR2C,COPS6,NEDD8,XPC,TOP2A,POLR2I,COPS5,COPS7A,DNA2,POLR2H,RPA1,RFC5,DDB1,PCNA,ERCC1,H3F3A/H3F3B,RFC4,POLR2E,GPS1,POLD2,UBE2I,RFC3
Antigen Presentation Pathway	7.73	0.421	NaN	PSMB9,CALR,PSMB5,PDIA3,HLA-A,HLA-DQA1,CANX,PSMB8,CD74,HLA-DQB1,PSMB6,HLA-G,HLA-DMA,HLA-DMB,HLA-DRB5,HLA-E
Unfolded protein response	7.23	0.339	NaN	CALR,P4HB,INSIG1,HSPA9,HSPA1A/HSPA1B,XBP1,CEBPD,CANX,HSPA5,EIF2A,CEBPE,HSPA8,HSPA4,HSP90B1,PDIA6,PPP1R15A,VCP,CD82,NFE2L2
Sumoylation Pathway	6.12	0.25	-0.447	TP53,SERBP1,SUMO3,GDI1,RAN,GDI2,RPA1,RFC5,UBA2,FAS,ARHGDIB,PCNA,JUN,RHOG,SAE1,RFC4,RND3,STUB1,SUMO1,RANGAP1,SUMO2,ARHGDIA,RFC3,UBE2I
Cell Cycle: G2/M DNA Damage Checkpoint Regulation	5.21	0.306	-0.832	TP53,YWHAE,YWHAH,YWHAB,CCNB2,PLK1,AURKA,CDK1,CCNB1,YWHAQ,GADD45A,CDKN1A,CKS1B,TOP2A,FBXL5
Glutaryl-CoA Degradation	4.8	0.5	2.828	HSD17B10,ACAT2,PARK7,ACAT1,HADHB,HSD17B4,HADHA,HADH
Mitotic Roles of Polo-Like Kinase	4.7	0.258	2.714	FZR1,KIF23,CDC20,PTTG1,PPP2R5D,PRC1,CCNB2,PLK1,ANAPC13,CDK1,CCNB1,HSP90B1,HSP90AB1,CAPN1,ANAPC5,HSP90AA1,CDC16
NRF2-mediated Oxidative Stress Response	4.59	0.173	1.964	RAP2B,RAF1,PRDX1,PPIB,DNAJC15,CLPP,MAFG,AKR1A1,JUN,SCARB1,KEAP1,VCP,PMF1/PMF1-BGLAP,DNAJA3,NFE2L2,MGST1,DNAJC9,MAP3K1,DNAJC19,JUNB,SOD1,GSTO1,DNAJC11,FTL,ERP29,MGST2,STIP1,DNAJB11,CAT,CCT7,SQSTM1,ACTG1,GSTP1,MGST3,DNAJC7
Aryl Hydrocarbon Receptor Signaling	4.4	0.19	0	CDK4,PTGES3,FAS,MYC,CCNA2,ALDH2,HSP90B1,JUN,HSP90AB1,RARA,NEDD8,NFE2L2,TP53,ALDH1B1,MGST1,BAX,ALDH9A1,GSTO1,MGST2,CDKN1A,HSP90AA1,IL1B,ALDH3B1,CDKN1B,MGST3,GSTP1,MCM7
Isoleucine Degradation I	4.26	0.5	2.646	HSD17B10,ECHS1,ACAT2,BCAT2,ACAT1,HADHB,HADHA
Tumoricidal Function of Hepatic Natural Killer Cells	4.11	0.375	1.633	M6PR,CASP6,ICAM1,BID,CYCS,BAX,CASP8,ITGAL,FAS
autophagy	3.97	0.246	NaN	CTSV,CTSZ,CTSA,VPS16,CTSH,CTSS,VPS41,WIPI1,VPS33A,ATG3,CTSB,LAMP1,MAP1LC3B,SQSTM1,CTSC
Tryptophan Degradation III (Eukaryotic)	3.95	0.36	3	HSD17B10,ACAT2,PARK7,HAAO,ACAT1,HADHB,HSD17B4,HADHA,HADH
Huntington's Disease Signaling	3.92	0.155	-1.508	POLR2F,SDHB,ATP5MC1,POLR2D,ATP5F1D,HSPA1A/HSPA1B,POLR2J,HSPA5,AP2A2,NSF,CASP6,HSPA4,POLR2C,JUN,CASP8,ATP5PB,SDHA,POLR2I,TP53,ATP5PF,ATP5F1A,HSPA9,PSME2,POLR2H,BAX,GPAA1,GNG10,HSPA8,ATP5F1C,PSME1,HDAC3,ATP5F1B,POLR2E,CAPN1,CLTA,RPS27A,CYCS,CAPN2,GOSR2
Fatty Acid Î²-oxidation I	3.74	0.312	1.897	HSD17B10,ECHS1,HADHB,HSD17B4,ECI1,ACAA2,ACSL1,HADHA,HADH,SLC27A4
Caveolar-mediated Endocytosis Signaling	3.71	0.225	NaN	COPZ1,ARCN1,HLA-A,COPA,COPE,CD48,COPB2,RAB5B,ITGAL,ITGB7,COPG1,ITGB2,CD55,ITGAM,ITGA1,ACTG1
BER pathway	3.71	0.5	NaN	PCNA,PNKP,FEN1,APEX1,PARP1,POLB
tRNA Charging	3.62	0.282	3.317	NARS,TARS2,RARS,GARS,KARS,Qars,TARS,SARS,VARS,FARSB,FARSA
Type I Diabetes Mellitus Signaling	3.53	0.189	-0.302	ICA1,HLA-A,TNFRSF1A,SOCS6,HLA-DQA1,IFNGR1,MAPK13,HSPD1,HLA-DQB1,CD3D,FAS,HLA-G,TRADD,HLA-DMA,HLA-DMB,IL1B,BID,CYCS,CASP8,HLA-E,HLA-DRB5
Nucleotide Excision Repair Pathway	3.39	0.286	NaN	POLR2I,POLR2F,ERCC1,POLR2D,POLR2C,POLR2E,XPC,POLR2J,POLR2H,RPA1
Graft-versus-Host Disease Signaling	3.36	0.25	NaN	HLA-G,IL36G,HLA-A,IL1RN,HLA-DMA,HLA-DMB,HLA-DQA1,IL1B,HLA-DQB1,HLA-E,HLA-DRB5,FAS
GADD45 Signaling	3.25	0.368	NaN	TP53,PCNA,GADD45A,CDKN1A,CDK4,CDK1,CCNB1
D-glucuronate Degradation I	3.24	1	NaN	AKR1A1,DCXR,CRYL1
Systemic Lupus Erythematosus Signaling	3.23	0.148	NaN	RAP2B,HLA-A,ZMAT5,TXNL4A,HNRNPA2B1,FCGR1A,LSM2,HLA-G,IL36G,JUN,EFTUD2,SNRPD1,LSM3,SNRPD3,SNRPD2,FCGR3A/FCGR3B,LSM4,TNFSF13B,SNRPA1,SNRNP40,SNRPB,FCGR2A,SNRPF,IL6R,CD3D,PPIH,CD40,LSM12,IL1RN,SNRNP25,SNRPB2,SNRNP70,IL1B,LSM7,HLA-E
Proline Biosynthesis II (from Arginine)	3.2	0.667	1	PYCR3,PADI4,OAT,PYCR2
Arginine Degradation VI (Arginase 2 Pathway)	3.2	0.667	1	PYCR3,OAT,ARG2,PYCR2
Hereditary Breast Cancer Signaling	3.12	0.164	NaN	POLR2I,RAP2B,TP53,NPM1,POLR2F,POLR2D,TUBG1,CDK4,POLR2J,POLR2H,RPA1,RFC5,CDK1,CCNB1,POLR2C,HDAC3,RFC4,GADD45A,POLR2E,H2AFX,SMARCB1,CDKN1A,XPC,RPS27A,RFC3
Lipid Antigen Presentation by CD1	3.04	0.308	NaN	CALR,AP2M1,AP1G2,PDIA3,CANX,PSAP,AP2A2,AP2S1
Iron homeostasis signaling pathway	3.04	0.168	NaN	ATP6V0B,PCBP1,ATP6V1C1,NUBP1,HSPA9,TYK2,ACO2,IL6R,STAT3,ATP6V1A,LYRM4,CIAO2A,HMOX2,MCOLN1,FTL,HP,NUBP2,SLC40A1,FBXL5,NFS1,CIAO2B,ATP6V1B2,STEAP3
Hypoxia Signaling in the Cardiovascular System	3	0.203	NaN	TP53,P4HB,UBE2A,COPS5,UBE2F,UBE2L3,HSP90B1,JUN,UBE2B,HSP90AB1,SUMO1,UBE2V1,HSP90AA1,UBE2C,UBE2I
Mismatch Repair in Eukaryotes	2.9	0.375	NaN	PCNA,RFC4,RPA1,FEN1,RFC5,RFC3
IL-10 Signaling	2.84	0.203	NaN	CCR1,BLVRA,FCGR2A,TYK2,ARG2,STAT3,MAPK13,IL18RAP,IL1R2,IL36G,JUN,IL1RN,CD14,IL1B
Remodeling of Epithelial Adherens Junctions	2.84	0.203	NaN	TUBA1B,NME1,TUBB4B,ARPC5L,TUBB2A,TUBG1,CTNNA1,RAB5B,IQGAP1,TUBB,TUBA1A,TUBB6,TUBA8,ACTG1
Ethanol Degradation II	2.84	0.265	0.333	ADH5,ALDH2,ALDH1B1,AKR1A1,DHRS9,ALDH3B1,ALDH9A1,ACSL1,DHRS4
Superpathway of Cholesterol Biosynthesis	2.81	0.286	2.828	FDPS,MVD,SQLE,EBP,ACAT2,ACAT1,HADHB,HADHA
RAN Signaling	2.74	0.353	NaN	CSE1L,RANGAP1,RAN,KPNA2,RANBP1,IPO5
Superpathway of Geranylgeranyldiphosphate Biosynthesis I (via Mevalonate)	2.74	0.353	2.449	MVD,FDPS,ACAT2,ACAT1,HADHB,HADHA
Cell Cycle Control of Chromosomal Replication	2.73	0.214	NaN	MCM3,MCM5,MCM6,PCNA,MCM2,CDT1,DNA2,TOP2A,CDK4,RPA1,CDK1,MCM7
Glutathione Redox Reactions II	2.67	0.75	NaN	PDIA3,TXNDC12,GLRX
Valine Degradation I	2.6	0.333	2.449	ECHS1,BCAT2,BCKDHA,HIBADH,HADHB,HADHA
Noradrenaline and Adrenaline Degradation	2.56	0.243	1	ADH5,ALDH2,ALDH1B1,AKR1A1,DHRS9,COMT,ALDH3B1,ALDH9A1,DHRS4
Complement System	2.56	0.243	-1.633	ITGB2,CD55,ITGAM,C3,C5AR1,CFB,C1QBP,CFH,C3AR1
Leukotriene Biosynthesis	2.54	0.385	-0.447	LTA4H,MGST2,ALOX5,MGST3,DPEP2
Mevalonate Pathway I	2.54	0.385	2.236	MVD,ACAT2,ACAT1,HADHB,HADHA
Induction of Apoptosis by HIV1	2.4	0.197	1.732	TP53,TRADD,SLC25A4,CXCR4,TNFRSF1A,BID,SLC25A3,CYCS,BAX,SLC25A5,CASP8,FAS
Granulocyte Adhesion and Diapedesis	2.39	0.144	NaN	CSF3R,VCAM1,ICAM1,C5AR1,CLDN15,CXCR4,TNFRSF1A,FPR2,MMP25,ITGAL,IL18RAP,Ccl9,FPR1,IL1R2,ITGB2,IL36G,ITGAM,IL1RN,CLDN1,CXCR2,Ccl2,MMP8,IL1B,ITGA1,Ccl6,MMP9
Gluconeogenesis I	2.36	0.269	1.89	PGK1,ENO1,GPI,PGAM1,GAPDH,ME2,MDH1
Inflammasome pathway	2.34	0.3	0.816	NLRP3,PYCARD,CTSB,IL1B,CASP8,P2RX7
Apoptosis Signaling	2.25	0.167	1.5	TP53,RAP2B,RAF1,TNFRSF1A,LMNA,BAX,CDK1,FAS,PARP1,CASP6,CAPN1,BID,CYCS,CAPN2,BCL2A1,CASP8
Glucocorticoid Receptor Signaling	2.25	0.124	NaN	RAP2B,RAF1,POLR2F,POLR2D,ICAM1,YWHAH,HSPA1A/HSPA1B,POLR2J,SLPI,MAPK13,HSPA5,FCGR1A,PTGES3,TSC22D3,IL1R2,HSPA4,HSP90B1,POLR2C,JUN,HSP90AB1,ANXA1,SUMO1,SMARCB1,ADRB2,POLR2I,TAF9,VCAM1,TAF6,HSPA9,MAP3K1,POLR2H,GTF2F1,STAT3,CD3D,HSPA8,IL1RN,DUSP1,POLR2E,CDKN1A,FKBP4,HSP90AA1,IL1B,UBE2I
Autoimmune Thyroid Disease Signaling	2.2	0.204	NaN	HLA-G,CD40,HLA-A,HLA-DMA,HLA-DMB,HLA-DQA1,HLA-DQB1,HLA-E,HLA-DRB5,FAS
Cyclins and Cell Cycle Regulation	2.18	0.173	1.265	TP53,RAF1,CCNA2,CDKN2D,HDAC3,PA2G4,PPP2R5D,CDKN1A,CDK4,CCNB2,FBXL5,CDKN1B,CDK1,CCNB1
Ketogenesis	2.18	0.4	2	ACAT2,ACAT1,HADHB,HADHA
Ketolysis	2.18	0.4	2	ACAT2,ACAT1,HADHB,HADHA
Guanine and Guanosine Salvage I	2.16	1	NaN	PNP,HPRT1
Adenine and Adenosine Salvage I	2.16	1	NaN	PNP,APRT
Formaldehyde Oxidation II (Glutathione-dependent)	2.16	1	NaN	ADH5,ESD
Altered T Cell and B Cell Signaling in Rheumatoid Arthritis	2.15	0.167	NaN	HLA-A,HLA-DQA1,LTB,HLA-DQB1,FAS,IL36G,CD40,IL1RN,HLA-DMA,TNFSF13,HLA-DMB,IL1B,TNFRSF13B,HLA-DRB5,TNFSF13B
Assembly of RNA Polymerase II Complex	2.14	0.2	NaN	POLR2I,TAF9,POLR2F,POLR2D,TAF6,POLR2C,POLR2E,POLR2J,POLR2H,GTF2F1
Polyamine Regulation in Colon Cancer	2.12	0.273	NaN	MYC,PSME1,MAX,MXD1,PSME2,OAZ1
Granzyme B Signaling	2.1	0.312	2.236	BID,CYCS,CASP8,LMNB1,PARP1
Interferon Signaling	2.08	0.222	2.828	IFITM3,OAS1,TYK2,IFI35,IFNGR1,BAX,PSMB8,IFNAR2
Cell Cycle: G1/S Checkpoint Regulation	2.06	0.179	0	MYC,RPL11,TP53,CDKN2D,HDAC3,MAX,PA2G4,CDKN1A,CDK4,RPL5,FBXL5,CDKN1B
p38 MAPK Signaling	2.06	0.153	-0.5	TP53,TIFA,TNFRSF1A,HMGN1,MAPK13,FAS,IL18RAP,MYC,IL1R2,TRADD,IL36G,H3F3A/H3F3B,MAX,IL1RN,DUSP1,IL1B,MAP4K1,RPS6KA4
Arginine Biosynthesis IV	2.02	0.5	NaN	OAT,ASS1,GLUD1
GDP-mannose Biosynthesis	2.02	0.5	NaN	GPI,GMPPA,PMM2
Pentose Phosphate Pathway	2.01	0.364	-1	PGD,TKT,PGLS,TALDO1
Dolichyl-diphosphooligosaccharide Biosynthesis	2.01	0.364	2	ALG3,ALG5,DPAGT1,DPM3
14-3-3-mediated Signaling	1.95	0.144	2.111	RAP2B,TUBA1B,RAF1,YWHAH,YWHAE,YWHAB,PDIA3,TUBB4B,TNFRSF1A,TUBB2A,TUBG1,VIM,BAX,TUBB,YWHAQ,JUN,TUBA1A,TUBA8,TUBB6,CDKN1B
Glutathione Redox Reactions I	1.92	0.25	0.816	GPX3,MGST1,MGST2,GPX1,GSTP1,MGST3
Guanosine Nucleotides Degradation III	1.86	0.333	0	GDA,NT5E,PNP,NT5C
Cytotoxic T Lymphocyte-mediated Apoptosis of Target Cells	1.84	0.219	0.816	CASP6,HLA-A,BID,CYCS,CASP8,CD3D,FAS
Ethanol Degradation IV	1.83	0.24	0	ALDH2,ALDH1B1,CAT,ALDH3B1,ALDH9A1,ACSL1
Superpathway of Serine and Glycine Biosynthesis I	1.81	0.429	NaN	PSAT1,PHGDH,SHMT2
T Helper Cell Differentiation	1.77	0.164	NaN	CD40,HLA-A,TNFRSF1A,HLA-DMA,IL6R,HLA-DMB,HLA-DQA1,IFNGR1,STAT3,HLA-DQB1,BCL6,HLA-DRB5
Purine Nucleotides Degradation II (Aerobic)	1.76	0.263	0.447	GDA,IMPDH2,NT5E,PNP,NT5C
Estrogen-mediated S-phase Entry	1.75	0.231	1.633	MYC,CCNA2,CDKN1A,CDK4,CDKN1B,CDK1
Glycolysis I	1.75	0.231	1.633	PGK1,ENO1,GPI,TPI1,PGAM1,GAPDH
Role of CHK Proteins in Cell Cycle Checkpoint Control	1.74	0.175	0.447	TP53,PCNA,RFC4,PPP2R5D,CDKN1A,RPA1,PLK1,RFC5,CDK1,RFC3
Urate Biosynthesis/Inosine 5'-phosphate Degradation	1.73	0.308	1	IMPDH2,NT5E,PNP,NT5C
Hypusine Biosynthesis	1.71	0.667	NaN	EIF5A,DOHH
TNFR1 Signaling	1.68	0.18	1.667	MAP4K2,TRADD,CASP6,JUN,TNFRSF1A,MAP3K1,BID,CYCS,CASP8
Granzyme A Signaling	1.67	0.25	NaN	HIST1H1C,SET,NME1,H1F0,APEX1
Nur77 Signaling in T Lymphocytes	1.64	0.169	NaN	Calm1 (includes others),HLA-A,HLA-DMA,HLA-DMB,HLA-DQA1,NR4A1,CYCS,HLA-DQB1,CD3D,HLA-DRB5
Colanic Acid Building Blocks Biosynthesis	1.61	0.286	1	TSTA3,GPI,GMPPA,PMM2
Myc Mediated Apoptosis Signaling	1.61	0.156	NaN	YWHAQ,MYC,RAP2B,TP53,YWHAE,YWHAH,YWHAB,BID,CYCS,BAX,CASP8,FAS
Oxidative Ethanol Degradation III	1.58	0.238	-0.447	ALDH2,ALDH1B1,ALDH3B1,ALDH9A1,ACSL1
Endoplasmic Reticulum Stress Pathway	1.58	0.238	NaN	CALR,HSP90B1,XBP1,EIF2S1,HSPA5
B Cell Development	1.57	0.194	NaN	CD40,HLA-A,HLA-DMA,HLA-DMB,HLA-DQA1,HLA-DQB1,HLA-DRB5
LPS/IL-1 Mediated Inhibition of RXR Function	1.5	0.121	-1.897	SLC27A4,CHST15,IL1R2,ALDH2,IL36G,JUN,SCARB1,RARA,FABP5,ALDH1B1,MGST1,TNFRSF1A,MAP3K1,CHST12,PAPSS2,ALDH9A1,GSTO1,IL18RAP,MGST2,IL1RN,CAT,IL1B,CD14,ALDH3B1,MGST3,GSTP1,ACSL1
FAT10 Cancer Signaling Pathway	1.46	0.174	-2.121	TP53,EEF1A1,MAD2L1,PCNA,TNFRSF1A,CXCR4,MAD2L2,STAT3
Atherosclerosis Signaling	1.44	0.133	NaN	VCAM1,ICAM1,MSR1,CXCR4,CCR2,PLA2G7,TNFRSF14,PLBD1,ITGB2,IL36G,CD40,IL1RN,IL1B,S100A8,ALOX5,MMP9,PAFAH1B3
Arsenate Detoxification I (Glutaredoxin)	1.43	0.5	NaN	PNP,GSTO1
Pentose Phosphate Pathway (Oxidative Branch)	1.43	0.5	NaN	PGD,PGLS
Heme Degradation	1.43	0.5	NaN	BLVRA,HMOX2
Ascorbate Recycling (Cytosolic)	1.43	0.5	NaN	GLRX,GSTO1
Proline Biosynthesis I	1.43	0.5	NaN	PYCR3,PYCR2
Arginine Degradation I (Arginase Pathway)	1.43	0.5	NaN	OAT,ARG2
Extrinsic Prothrombin Activation Pathway	1.41	0.25	-1	F10,PROS1,F5,F13A1
Parkinson's Signaling	1.41	0.25	NaN	SEPT5,PARK7,CYCS,MAPK13
PI3K/AKT Signaling	1.41	0.132	2.183	RAP2B,TP53,RAF1,CDC37,YWHAH,YWHAE,YWHAB,PPP2R5D,TYK2,EIF4E,YWHAQ,HSP90B1,GYS1,HSP90AB1,CDKN1A,HSP90AA1,CDKN1B
Germ Cell-Sertoli Cell Junction Signaling	1.35	0.122	NaN	RAP2B,TUBA1B,RAC2,PXN,CFL1,TUBB4B,TNFRSF1A,MAP3K1,TUBB2A,TUBG1,CTNNA1,IQGAP1,TUBB,GSN,RHOG,TUBA1A,TUBA8,TUBB6,RND3,KEAP1,JUP,ACTG1
Role of JAK1, JAK2 and TYK2 in Interferon Signaling	1.35	0.208	NaN	RAF1,TYK2,IFNGR1,STAT3,IFNAR2
Calcium-induced T Lymphocyte Apoptosis	1.34	0.152	1.897	Calm1 (includes others),HLA-A,HLA-DMA,HLA-DMB,HLA-DQA1,NR4A1,CAPN2,HLA-DQB1,CD3D,HLA-DRB5
Glutathione-mediated Detoxification	1.34	0.188	0.816	MGST1,MGST2,GGH,GSTO1,GSTP1,MGST3
Agranulocyte Adhesion and Diapedesis	1.31	0.12	NaN	VCAM1,ICAM1,C5AR1,FN1,MYH9,CLDN15,CXCR4,TNFRSF1A,MMP25,ITGB7,Ccl9,ITGB2,IL36G,CLDN1,IL1RN,CXCR2,Ccl2,MMP8,IL1B,ITGA1,Ccl6,ACTG1,MMP9
Role of PKR in Interferon Induction and Antiviral Response	1.3	0.171	NaN	TP53,TNFRSF1A,BID,CYCS,EIF2S1,CASP8,FCGR1A
Role of JAK family kinases in IL-6-type Cytokine Signaling	1.28	0.2	NaN	TYK2,IL6R,OSM,STAT3,MAPK13
Tryptophan Degradation X (Mammalian, via Tryptamine)	1.28	0.2	0.447	ALDH2,ALDH1B1,AKR1A1,ALDH3B1,ALDH9A1
Aldosterone Signaling in Epithelial Cells	1.27	0.121	NaN	RAF1,DNAJC9,PDIA3,HSPA9,DNAJC19,HSPA1A/HSPA1B,TRAP1,DNAJC15,HSPD1,HSPA5,DNAJC11,HSPA8,HSPA4,HSP90B1,HSP90AB1,DUSP1,DNAJB11,HSPE1,HSP90AA1,DNAJC7,AHCY
Serine Biosynthesis	1.23	0.4	NaN	PSAT1,PHGDH
CMP-N-acetylneuraminate Biosynthesis I (Eukaryotes)	1.23	0.4	NaN	NAGK,NANS
Eumelanin Biosynthesis	1.23	0.4	NaN	MIF,DDT
ATM Signaling	1.23	0.134	0	TP53,JUN,CBX1,GADD45A,H2AFX,PPP2R5D,CDKN1A,CCNB2,BID,MAPK13,CBX3,CDK1,CCNB1
Acute Phase Response Signaling	1.22	0.119	-0.447	RAP2B,RAF1,FN1,C3,TNFRSF1A,SOCS6,MAP3K1,IL6R,MAPK13,STAT3,HMOX2,HNRNPK,TRADD,FTL,HP,IL36G,JUN,IL1RN,CFB,OSM,IL1B
Virus Entry via Endocytic Pathways	1.19	0.127	NaN	RAP2B,RAC2,AP2M1,HLA-A,ITGAL,AP2A2,AP2S1,ITGB7,AP1S1,ITGB2,CD55,AP1G2,CLTA,ITGA1,ACTG1
IL-17A Signaling in Fibroblasts	1.18	0.171	NaN	JUN,LCN2,CEBPD,MAPK13,IL17RA,NFKBIZ
Role of BRCA1 in DNA Damage Response	1.18	0.138	1	TP53,GADD45A,RFC4,CDKN1A,SMARCB1,RPA1,BABAM1,PLK1,RFC5,BRCC3,RFC3
Apelin Adipocyte Signaling Pathway	1.18	0.138	1.508	GPX3,MGST1,MGST2,CAT,GPX1,NCF2,CYBB,SOD1,MAPK13,GSTP1,MGST3
Histamine Degradation	1.17	0.211	0	ALDH1B1,ALDH2,ALDH3B1,ALDH9A1
DNA damage-induced 14-3-3Ïƒ Signaling	1.17	0.211	NaN	TP53,CCNB2,CDK1,CCNB1
FcÎ³ Receptor-mediated Phagocytosis in Macrophages and Monocytes	1.1	0.13	-1.155	PLD4,RAC2,NCF1,PXN,ARPC5L,FCGR2A,HCK,ACTG1,FCGR1A,VASP,FGR,FCGR3A/FCGR3B
Urea Cycle	1.08	0.333	NaN	ASS1,ARG2
Ceramide Degradation	1.08	0.333	NaN	ACER3,ASAH1
Methylthiopropionate Biosynthesis	1.08	1	NaN	ADI1
Glutamate Removal from Folates	1.08	1	NaN	GGH
Xanthine and Xanthosine Salvage	1.08	1	NaN	PNP
Sorbitol Degradation I	1.08	1	NaN	SORD
Histamine Biosynthesis	1.08	1	NaN	HDC
Alanine Biosynthesis III	1.08	1	NaN	NFS1
Death Receptor Signaling	1.07	0.129	1.732	TRADD,CASP6,TNFRSF1A,PARP2,BID,LMNA,CYCS,CASP8,ACTG1,FAS,ARHGDIB,PARP1
Serotonin Degradation	1.07	0.135	1.265	ADH5,ALDH2,ALDH1B1,AKR1A1,EXT2,DHRS9,Ugt1a7c,ALDH3B1,ALDH9A1,DHRS4
Role of IL-17A in Psoriasis	1.06	0.231	NaN	S100A9,S100A8,IL17RA
Bladder Cancer Signaling	1.05	0.128	NaN	MYC,RAP2B,TP53,RAF1,PA2G4,THBS1,MMP8,CDKN1A,CDK4,MMP25,MMP9,RASSF1
Estrogen Receptor Signaling	1.04	0.119	NaN	POLR2I,RAP2B,TAF9,RAF1,POLR2F,POLR2D,TAF6,PHB2,POLR2J,POLR2H,GTF2F1,HDAC3,POLR2C,H3F3A/H3F3B,POLR2E,MED10
Communication between Innate and Adaptive Immune Cells	0.996	0.125	NaN	HLA-G,IL36G,CD40,HLA-A,IL1RN,TNFSF13,IL1B,TNFRSF13B,HLA-E,TNFSF13B,HLA-DRB5,Ccl9
Fatty Acid Î±-oxidation	0.979	0.182	0	ALDH1B1,ALDH2,ALDH3B1,ALDH9A1
Salvage Pathways of Pyrimidine Ribonucleotides	0.971	0.124	2.309	PYCR3,NME1,PRKX,APOBEC1,CSNK1A1,CDK4,NME2,CMPK1,PLK1,HIPK1,ADPGK,CDK1
Pentose Phosphate Pathway (Non-oxidative Branch)	0.959	0.286	NaN	TKT,TALDO1
Adenine and Adenosine Salvage III	0.959	0.286	NaN	PNP,HPRT1
Aspartate Degradation II	0.959	0.286	NaN	MDH1,GOT2
Eicosanoid Signaling	0.959	0.132	-1.633	PLBD1,LTA4H,LTB4R,FPR2,CYSLTR1,ALOX5,PLA2G7,DPEP2,PAFAH1B3
Pyrimidine Deoxyribonucleotides De Novo Biosynthesis I	0.924	0.174	2	NME1,NME2,CMPK1,RRM1
Putrescine Degradation III	0.924	0.174	0	ALDH1B1,ALDH2,ALDH3B1,ALDH9A1
Superpathway of Citrulline Metabolism	0.91	0.2	NaN	OAT,ASS1,ARG2
Glycogen Degradation III	0.91	0.2	NaN	GAA,PYGL,PGM2
IL-8 Signaling	0.9	0.108	-1.789	RAP2B,RAC2,RAF1,VCAM1,ICAM1,BAX,IQGAP1,CSTB,GNG10,PLD4,ITGB2,ARRB2,JUN,ITGAM,RHOG,RND3,CXCR2,NCF2,CYBB,MMP9,VASP,LASP1
Sertoli Cell-Sertoli Cell Junction Signaling	0.896	0.109	NaN	RAP2B,TUBA1B,RAF1,CLDN15,TUBB4B,TNFRSF1A,MAP3K1,TUBB2A,TUBG1,CTNNA1,MAPK13,TUBB,JUN,TUBA1A,TUBA8,TUBB6,CLDN1,KEAP1,JUP,ACTG1
LXR/RXR Activation	0.886	0.116	2.111	ECHS1,C3,MSR1,TNFRSF1A,ARG2,IL18RAP,IL1R2,IL36G,IL1RN,IL1B,CD14,S100A8,HADH,MMP9
PPAR Signaling	0.876	0.119	0.577	RAP2B,IL1R2,RAF1,HSP90B1,IL36G,JUN,HSP90AB1,IL1RN,TNFRSF1A,IL1B,HSP90AA1,IL18RAP
Role of Tissue Factor in Cancer	0.873	0.114	NaN	RAP2B,TP53,P4HB,CFL1,EGR1,PLAUR,MAPK13,EIF4E,F10,ARRB2,PDIA6,HCK,IL1B,RPS6KA4,FGR
STAT3 Pathway	0.873	0.114	-1	RAP2B,RAF1,SOCS6,IL6R,TYK2,MAPK13,STAT3,IL17RA,NDUFA13,IL18RAP,IL1R2,MYC,CXCR2,CDKN1A,IL1B
Airway Pathology in Chronic Obstructive Pulmonary Disease	0.857	0.25	NaN	MMP8,MMP9
Dendritic Cell Maturation	0.857	0.107	0.943	ICAM1,PDIA3,HLA-A,FCGR2A,TNFRSF1A,HLA-DQA1,LTB,MAPK13,HLA-DQB1,FCGR1A,IL36G,CD40,IL1RN,HLA-DMA,TREM2,HLA-DMB,IL1B,LY75,IRF8,HLA-DRB5,FCGR3A/FCGR3B
Sphingosine and Sphingosine-1-phosphate Metabolism	0.857	0.25	NaN	ACER3,ASAH1
Superoxide Radicals Degradation	0.857	0.25	NaN	CAT,SOD1
Purine Ribonucleosides Degradation to Ribose-1-phosphate	0.857	0.25	NaN	PNP,PGM2
Chondroitin Sulfate Degradation (Metazoa)	0.845	0.188	NaN	GM2A,HEXA,HEXB
Adenosine Nucleotides Degradation II	0.845	0.188	NaN	NT5E,PNP,NT5C
Vitamin-C Transport	0.845	0.188	NaN	GLRX,SLC2A3,GSTO1
Amyotrophic Lateral Sclerosis Signaling	0.839	0.115	-0.832	TP53,GPX1,SOD1,RAB5B,BAX,GRINA,CCS,CAPN1,CAT,BID,CAPN2,CYCS,SSR4
Inhibition of Angiogenesis by TSP1	0.83	0.147	0.447	TP53,JUN,THBS1,MAPK13,MMP9
CDP-diacylglycerol Biosynthesis I	0.824	0.16	-2	LPCAT2,AGPAT2,CDS2,MBOAT7
Regulation of Cellular Mechanics by Calpain Protease	0.821	0.127	-0.816	RAP2B,CCNA2,PXN,CAPN1,CDK4,CAPN2,CDKN1B,CDK1
Integrin Signaling	0.804	0.104	-0.894	RAP2B,RAC2,RAF1,PXN,PFN1,ARPC5L,GSN,ITGAL,ITGB7,TSPAN3,ITGB2,ITGAM,RHOG,RND3,CAPN1,ARF4,ITGA1,CAPN2,NEDD9,Arf2,ACTG1,VASP,MYL12A
Epoxysqualene Biosynthesis	0.799	0.5	NaN	SQLE
L-DOPA Degradation	0.799	0.5	NaN	COMT
Spermidine Biosynthesis I	0.799	0.5	NaN	SRM
Sulfate Activation for Sulfonation	0.799	0.5	NaN	PAPSS2
Glycine Degradation (Creatine Biosynthesis)	0.799	0.5	NaN	GATM
GDP-L-fucose Biosynthesis I (from GDP-D-mannose)	0.799	0.5	NaN	TSTA3
Glycine Biosynthesis I	0.799	0.5	NaN	SHMT2
Glutamate Biosynthesis II	0.799	0.5	NaN	GLUD1
Glutamate Degradation X	0.799	0.5	NaN	GLUD1
Androgen Signaling	0.796	0.11	0	POLR2I,CALR,POLR2F,Calm1 (includes others),POLR2D,POLR2J,POLR2H,GTF2F1,NCOA4,GNG10,HSPA4,POLR2C,JUN,POLR2E,HSP90AA1
Coagulation System	0.79	0.143	-0.447	F10,PROS1,F5,F13A1,PLAUR
TWEAK Signaling	0.79	0.143	2.236	TRADD,CASP6,BID,CYCS,CASP8
Dermatan Sulfate Degradation (Metazoa)	0.788	0.176	NaN	GM2A,HEXA,HEXB
Xenobiotic Metabolism Signaling	0.785	0.1	NaN	RAP2B,RAF1,CAMK1,MAPK13,PTGES3,CHST15,ALDH2,HSP90B1,HSP90AB1,Ugt1a7c,SUMO1,KEAP1,NFE2L2,ALDH1B1,MGST1,PPP2R5D,MAP3K1,CHST12,ALDH9A1,GSTO1,ESD,FTL,MGST2,CAT,IL1B,HSP90AA1,ALDH3B1,MGST3,GSTP1,DNAJC7
Th1 Pathway	0.777	0.109	2.496	ICAM1,HLA-A,IL6R,TYK2,HLA-DQA1,IFNGR1,HLA-DQB1,STAT3,CD3D,ITGB2,CD40,HLA-DMA,APH1A,HLA-DMB,HLA-DRB5
iNOS Signaling	0.775	0.133	0.447	JUN,Calm1 (includes others),TYK2,CD14,IFNGR1,MAPK13
Sucrose Degradation V (Mammalian)	0.772	0.222	NaN	KHK,TPI1
Citrulline Biosynthesis	0.772	0.222	NaN	OAT,ARG2
Heme Biosynthesis II	0.772	0.222	NaN	UROD,HMBS
Folate Transformations I	0.772	0.222	NaN	MTHFS,SHMT2
Pyridoxal 5'-phosphate Salvage Pathway	0.767	0.123	1.414	PDXK,PRKX,CDK4,CSNK1A1,PLK1,HIPK1,ADPGK,CDK1
Leukocyte Extravasation Signaling	0.764	0.103	-2.065	RAC2,VCAM1,PXN,ICAM1,CLDN15,CXCR4,CTNNA1,MAPK13,MMP25,ITGAL,ITGB2,NCF1,ITGAM,CLDN1,MMP8,NCF2,CD44,CYBB,ITGA1,ACTG1,MMP9,VASP
Epithelial Adherens Junction Signaling	0.754	0.107	NaN	RAP2B,TUBA1B,MYH9,TUBB4B,ARPC5L,TUBB2A,TUBG1,CTNNA1,IQGAP1,TUBB,TUBA1A,TUBB6,TUBA8,KEAP1,JUP,ACTG1
Allograft Rejection Signaling	0.752	0.116	NaN	HLA-G,CD40,HLA-A,HLA-DMA,HLA-DMB,HLA-DQA1,HLA-DQB1,HLA-E,HLA-DRB5,FAS
Phosphatidylglycerol Biosynthesis II (Non-plastidic)	0.738	0.148	-2	LPCAT2,AGPAT2,CDS2,MBOAT7
Dopamine Degradation	0.719	0.135	0.447	ALDH2,ALDH1B1,COMT,ALDH3B1,ALDH9A1
Acute Myeloid Leukemia Signaling	0.699	0.111	0.447	MYC,CSF3R,RAP2B,RAF1,IDH3G,RARA,IDH2,STAT3,JUP,IDH3B,IDH1
GDP-glucose Biosynthesis	0.699	0.2	NaN	HK3,PGM2
Mineralocorticoid Biosynthesis	0.699	0.2	NaN	EBP,HSD3B7
Crosstalk between Dendritic Cells and Natural Killer Cells	0.69	0.112	NaN	HLA-G,CD40,HLA-A,TREM2,LTB,ITGAL,ACTG1,HLA-E,HLA-DRB5,FAS
Methylglyoxal Degradation III	0.684	0.158	NaN	AKR1A1,FAM213B,AKR1B1
VEGF Signaling	0.674	0.108	0	RAP2B,RAF1,PXN,YWHAE,EIF2B1,EIF2S3,EIF2S1,ACTG1,EIF2B2,EIF1AY,EIF1AX,EIF2S2
Glioma Signaling	0.67	0.107	0	TP53,RAP2B,RAF1,CDKN2D,Calm1 (includes others),CAMK1,PA2G4,IDH3G,CDKN1A,CDK4,IDH2,IDH3B,IDH1
OX40 Signaling Pathway	0.67	0.111	NaN	HLA-G,JUN,HLA-A,HLA-DMA,HLA-DMB,HLA-DQA1,HLA-DQB1,CD3D,HLA-E,HLA-DRB5
D-myo-inositol (1,4,5,6)-Tetrakisphosphate Biosynthesis	0.662	0.104	2.84	NUDT9,PPP2R5D,MDP1,NUDT14,NT5C,IGBP1,NUDT5,SET,PTPRO,DUSP1,NUDT4,DUSP12,PPP1CA,PPP5C,SIRPA
D-myo-inositol (3,4,5,6)-tetrakisphosphate Biosynthesis	0.662	0.104	2.84	NUDT9,PPP2R5D,MDP1,NUDT14,NT5C,IGBP1,NUDT5,SET,PTPRO,DUSP1,NUDT4,DUSP12,PPP1CA,PPP5C,SIRPA
April Mediated Signaling	0.656	0.128	1.342	JUN,TNFSF13,MAP3K1,TNFRSF13B,MAPK13
Cdc42 Signaling	0.646	0.102	-0.333	RAF1,CFL1,HLA-A,ARPC5L,HLA-DQA1,MAPK13,HLA-DQB1,IQGAP1,CD3D,HLA-G,JUN,HLA-DMA,HLA-DMB,CDC42SE1,HLA-E,HLA-DRB5,MYL12A
L-carnitine Biosynthesis	0.64	0.333	NaN	ALDH9A1
Diphthamide Biosynthesis	0.64	0.333	NaN	EEF2
The Visual Cycle	0.64	0.15	NaN	DHRS3,DHRS9,DHRS4
NADH Repair	0.64	0.333	NaN	GAPDH
Methylglyoxal Degradation I	0.64	0.333	NaN	GLO1
S-methyl-5-thio-Î±-D-ribose 1-phosphate Degradation	0.64	0.333	NaN	ADI1
Tetrahydrobiopterin Biosynthesis I	0.64	0.333	NaN	SPR
L-cysteine Degradation III	0.64	0.333	NaN	GOT2
Inosine-5'-phosphate Biosynthesis II	0.64	0.333	NaN	PAICS
4-hydroxyproline Degradation I	0.64	0.333	NaN	GOT2
Oxidized GTP and dGTP Detoxification	0.64	0.333	NaN	RUVBL2
Tetrahydrobiopterin Biosynthesis II	0.64	0.333	NaN	SPR
Glutamate Degradation II	0.64	0.333	NaN	GOT2
S-adenosyl-L-methionine Biosynthesis	0.64	0.333	NaN	MAT2A
Aspartate Biosynthesis	0.64	0.333	NaN	GOT2
p53 Signaling	0.638	0.106	0	TP53,CASP6,PCNA,JUN,GADD45A,THBS1,CDKN1A,CDK4,BAX,ST13,BIRC5,FAS
Glucose and Glucose-1-phosphate Degradation	0.636	0.182	NaN	HK3,PGM2
Purine Nucleotides De Novo Biosynthesis II	0.636	0.182	NaN	IMPDH2,PAICS
Glucocorticoid Biosynthesis	0.636	0.182	NaN	EBP,HSD3B7
UDP-N-acetyl-D-galactosamine Biosynthesis II	0.636	0.182	NaN	GPI,HK3
Breast Cancer Regulation by Stathmin1	0.635	0.0991	NaN	RAP2B,TP53,TUBA1B,RAF1,CAMK1,Calm1 (includes others),TUBB4B,PPP2R5D,TUBB2A,TUBG1,ARHGEF1,TUBB,CDK1,GNG10,STMN1,TUBA1A,TUBA8,TUBB6,CDKN1A,CDKN1B,PPP1CA
Neuroinflammation Signaling Pathway	0.631	0.0958	1.461	ICAM1,HLA-A,PYCARD,HLA-DQA1,HLA-DQB1,CX3CR1,MAPK13,FAS,GRINA,JUN,HLA-DMA,HLA-DMB,CYBB,CASP8,NFE2L2,VCAM1,NLRP3,TNFRSF1A,IL6R,TYK2,IFNGR1,BIRC5,CD40,APH1A,TREM2,NCF2,IL1B,P2RX7,HLA-DRB5,MMP9
Oncostatin M Signaling	0.625	0.125	-0.447	RAP2B,RAF1,TYK2,OSM,STAT3
B Cell Activating Factor Signaling	0.597	0.122	0.447	JUN,MAP3K1,TNFRSF13B,MAPK13,TNFSF13B
T Cell Exhaustion Signaling Pathway	0.592	0.0989	1.667	RAP2B,HLA-A,PPP2R5D,BATF,TYK2,IL6R,HLA-DQA1,STAT3,HLA-DQB1,BCL6,IFNAR2,TNFRSF14,HLA-G,JUN,HLA-DMA,HLA-DMB,HLA-E,HLA-DRB5
Assembly of RNA Polymerase I Complex	0.58	0.167	NaN	POLR1D,POLR2F
MIF Regulation of Innate Immunity	0.57	0.119	0.447	TP53,MIF,JUN,CD14,CD74
D-myo-inositol-5-phosphate Metabolism	0.564	0.0988	3	NUDT9,PPP2R5D,MDP1,NUDT14,IGBP1,NT5C,PLD4,NUDT5,SET,PTPRO,DUSP1,NUDT4,PPP1CA,DUSP12,PPP5C,SIRPA
CD27 Signaling in Lymphocytes	0.558	0.113	-1.342	SIVA1,JUN,MAP3K1,BID,CYCS,CASP8
Th2 Pathway	0.548	0.0987	-0.447	CCR1,ICAM1,CXCR4,HLA-A,TYK2,HLA-DQA1,HLA-DQB1,CD3D,ITGB2,JUN,CD40,HLA-DMA,APH1A,HLA-DMB,HLA-DRB5
TREM1 Signaling	0.545	0.107	-0.707	TREM1,NLRP3,ICAM1,CD40,NLRP12,LAT2,IL1B,STAT3
Agrin Interactions at Neuromuscular Junction	0.545	0.107	0	RAP2B,ITGB2,RAC2,PXN,JUN,ITGA1,ACTG1,ITGAL
Hepatic Fibrosis / Hepatic Stellate Cell Activation	0.544	0.0968	NaN	VCAM1,ICAM1,FN1,MYH9,TNFRSF1A,IL6R,IFNGR1,BAX,IFNAR2,FAS,IL18RAP,IL1R2,CD40,EDNRA,IL1B,CD14,ECE1,MMP9
Telomerase Signaling	0.544	0.101	1	MYC,RAP2B,TP53,RAF1,HSP90B1,HDAC3,HSP90AB1,PPP2R5D,DKC1,CDKN1A,HSP90AA1,PTGES3
Role of Macrophages, Fibroblasts and Endothelial Cells in Rheumatoid Arthritis	0.538	0.0929	NaN	RAP2B,RAF1,Calm1 (includes others),FN1,ICAM1,PDIA3,CEBPD,CSNK1A1,LTB,IL17RA,FCGR1A,IL1R2,MYC,TRADD,IL36G,JUN,OSM,FCGR3A/FCGR3B,TNFSF13B,VCAM1,MIF,C5AR1,TNFRSF1A,IL6R,STAT3,CEBPE,IL18RAP,IL16,IL1RN,IL1B
Uracil Degradation II (Reductive)	0.532	0.25	NaN	DPYSL2
PRPP Biosynthesis I	0.532	0.25	NaN	PRPS1
Branched-chain Î±-keto acid Dehydrogenase Complex	0.532	0.25	NaN	BCKDHA
Heme Biosynthesis from Uroporphyrinogen-III I	0.532	0.25	NaN	UROD
Phenylethylamine Degradation I	0.532	0.25	NaN	ALDH2
Î±-tocopherol Degradation	0.532	0.25	NaN	CYP4F2
Thymine Degradation	0.532	0.25	NaN	DPYSL2
L-cysteine Degradation I	0.532	0.25	NaN	GOT2
N-acetylglucosamine Degradation II	0.532	0.25	NaN	NAGK
Phenylalanine Degradation I (Aerobic)	0.532	0.25	NaN	QDPR
Molybdenum Cofactor Biosynthesis	0.532	0.25	NaN	NFS1
Acetate Conversion to Acetyl-CoA	0.532	0.25	NaN	ACSL1
Fatty Acid Î²-oxidation III (Unsaturated, Odd Number)	0.532	0.25	NaN	ECI1
Th1 and Th2 Activation Pathway	0.532	0.0963	NaN	CCR1,ICAM1,HLA-A,CXCR4,TYK2,IL6R,HLA-DQA1,IFNGR1,STAT3,HLA-DQB1,CD3D,ITGB2,JUN,CD40,HLA-DMA,APH1A,HLA-DMB,HLA-DRB5
Fatty Acid Activation	0.53	0.154	NaN	SLC27A4,ACSL1
Cholesterol Biosynthesis I	0.53	0.154	NaN	SQLE,EBP
Glycogen Degradation II	0.53	0.154	NaN	PYGL,PGM2
Bile Acid Biosynthesis, Neutral Pathway	0.53	0.154	NaN	CYP27A1,HSD3B7
Cholesterol Biosynthesis II (via 24,25-dihydrolanosterol)	0.53	0.154	NaN	SQLE,EBP
Cholesterol Biosynthesis III (via Desmosterol)	0.53	0.154	NaN	SQLE,EBP
Toll-like Receptor Signaling	0.527	0.105	-1.134	IL36G,JUN,IL1RN,MAP3K1,CD14,IL1B,RPS27A,MAPK13
Small Cell Lung Cancer Signaling	0.526	0.103	0	MYC,TP53,MAX,PA2G4,CDK4,CKS1B,BID,CYCS,CDKN1B
Pyrimidine Ribonucleotides Interconversion	0.52	0.114	2.236	NUDT5,NME1,NUDT9,NME2,CMPK1
Stearate Biosynthesis I (Animals)	0.52	0.114	-0.447	FAM213B,ACOT7,SLC27A4,ACSL1,MBOAT7
Chemokine Signaling	0.509	0.104	-0.707	RAP2B,RAF1,CAMK1,Calm1 (includes others),JUN,CFL1,CXCR4,MAPK13
DNA Methylation and Transcriptional Repression Signaling	0.504	0.118	NaN	HIST1H4A,H3F3A/H3F3B,MTA2,RBBP7
Role of JAK2 in Hormone-like Cytokine Signaling	0.504	0.118	NaN	SOCS6,TYK2,STAT3,SIRPA
Regulation of Actin-based Motility by Rho	0.493	0.101	-0.378	RAC2,RHOG,PFN1,CFL1,RND3,ARPC5L,ARHGDIA,GSN,MYL12A
VDR/RXR Activation	0.492	0.103	-1.342	SERPINB1,CAMP,GADD45A,MXD1,CDKN1A,CD14,CDKN1B,PSMC5
IL-22 Signaling	0.492	0.125	NaN	TYK2,STAT3,MAPK13
Androgen Biosynthesis	0.485	0.143	NaN	EBP,HSD3B7
Phenylalanine Degradation IV (Mammalian, via Side Chain)	0.485	0.143	NaN	ALDH2,GOT2
Role of Oct4 in Mammalian Embryonic Stem Cell Pluripotency	0.474	0.109	NaN	TP53,CASP6,PHB,RARA,PARP1
Pyrimidine Ribonucleotides De Novo Biosynthesis	0.474	0.109	2.236	NUDT5,NME1,NUDT9,NME2,CMPK1
3-phosphoinositide Degradation	0.474	0.0949	2.84	NUDT9,PPP2R5D,MDP1,NUDT14,NT5C,IGBP1,NUDT5,SET,PTPRO,DUSP1,NUDT4,DUSP12,PPP1CA,PPP5C,SIRPA
IL-6 Signaling	0.465	0.0956	-1.732	IL1R2,RAP2B,RAF1,IL36G,JUN,TNFRSF1A,IL1RN,IL6R,IL1B,CD14,STAT3,MAPK13,IL18RAP
IL-17A Signaling in Gastric Cells	0.461	0.12	NaN	JUN,MAPK13,IL17RA
ERK5 Signaling	0.456	0.101	2.646	MYC,YWHAQ,RAP2B,YWHAE,YWHAH,YWHAB,RPS6KA4
Trehalose Degradation II (Trehalase)	0.453	0.2	NaN	HK3
Protein Citrullination	0.453	0.2	NaN	PADI4
2-ketoglutarate Dehydrogenase Complex	0.453	0.2	NaN	OGDH
Tetrapyrrole Biosynthesis II	0.453	0.2	NaN	HMBS
Myo-inositol Biosynthesis	0.453	0.2	NaN	ISYNA1
Trans, trans-farnesyl Diphosphate Biosynthesis	0.453	0.2	NaN	FDPS
Citrulline-Nitric Oxide Cycle	0.453	0.2	NaN	ASS1
dTMP De Novo Biosynthesis	0.453	0.2	NaN	SHMT2
Folate Polyglutamylation	0.453	0.2	NaN	SHMT2
Prostate Cancer Signaling	0.452	0.0971	NaN	RAP2B,TP53,RAF1,HSP90B1,PA2G4,HSP90AB1,CDKN1A,HSP90AA1,CDKN1B,GSTP1
Triacylglycerol Biosynthesis	0.452	0.106	-2.236	LPCAT2,AGPAT2,DGAT2,DGAT1,MBOAT7
HIF1Î± Signaling	0.449	0.0952	NaN	RAP2B,TP53,JUN,COPS5,MMP8,HSP90AA1,MAPK13,MMP25,NAA10,APEX1,MMP9,SLC2A3
Production of Nitric Oxide and Reactive Oxygen Species in Macrophages	0.437	0.0918	-0.471	TNFRSF1A,PPP2R5D,MAP3K1,TYK2,ARG2,IFNGR1,MAPK13,NCF1,RHOG,JUN,RND3,NCF2,CAT,CYBB,S100A8,IRF8,PPP1CA,SIRPA
Antiproliferative Role of TOB in T Cell Signaling	0.433	0.115	NaN	PABPC1,CCNA2,CDKN1B
Cell Cycle Regulation by BTG Family Proteins	0.431	0.108	NaN	PPP2R5D,BTG2,BTG1,CDK4
Reelin Signaling in Neurons	0.419	0.0957	NaN	ITGB2,NDEL1,HCK,ITGA1,ARHGEF1,MAP4K1,ITGAL,FGR,PAFAH1B3
UVC-Induced MAPK Signaling	0.412	0.102	0.447	RAP2B,TP53,RAF1,JUN,MAPK13
HMGB1 Signaling	0.407	0.0922	0.277	RAP2B,VCAM1,JUN,RHOG,ICAM1,RND3,TNFRSF1A,HAT1,RBBP7,OSM,IL1B,IFNGR1,MAPK13
Ephrin B Signaling	0.407	0.0972	-0.447	RAC2,PXN,CFL1,CXCR4,CAP1,HNRNPK,GNG10
Protein Kinase A Signaling	0.401	0.0877	-0.186	HIST1H1C,RAF1,Calm1 (includes others),YWHAH,PDIA3,TIMM50,DUSP22,YWHAQ,CDKN3,DUSP3,GYS1,PTPRO,CDC16,PPP1CA,DUSP12,APEX1,VASP,MYL12A,SMPDL3A,KDELR1,PDE2A,PXN,YWHAE,YWHAB,MAP3K1,PYGL,ANAPC13,GNG10,H3F3A/H3F3B,DUSP1,ANAPC5,H1F0,EBI3,SIRPA,KDELR2
Selenocysteine Biosynthesis II (Archaea and Eukaryotes)	0.391	0.167	NaN	SARS
Glycogen Biosynthesis II (from UDP-D-Glucose)	0.391	0.167	NaN	GYS1
Rapoport-Luebering Glycolytic Shunt	0.391	0.167	NaN	PGAM1
Lactose Degradation III	0.391	0.167	NaN	PSAP
HIPPO signaling	0.385	0.0941	-1.89	YWHAQ,YWHAE,YWHAH,YWHAB,PPP2R5D,CD44,PPP1CA,RASSF1
Retinoic acid Mediated Apoptosis Signaling	0.384	0.0968	1.633	RARA,PARP2,BID,CYCS,CASP8,PARP1
Î³-linolenate Biosynthesis II (Animals)	0.378	0.118	NaN	SLC27A4,ACSL1
Mitochondrial L-carnitine Shuttle Pathway	0.378	0.118	NaN	SLC27A4,ACSL1
Phagosome Formation	0.378	0.0909	NaN	ITGB2,RHOG,ITGAM,FN1,C5AR1,MSR1,RND3,PDIA3,FCGR2A,FCGR1A,C3AR1,FCGR3A/FCGR3B
Amyloid Processing	0.376	0.098	-1	CAPN1,APH1A,CSNK1A1,CAPN2,MAPK13
Pancreatic Adenocarcinoma Signaling	0.36	0.0902	0.333	PLD4,TP53,RAF1,PA2G4,CDKN1A,TYK2,CDK4,STAT3,CDKN1B,BIRC5,MMP9
TR/RXR Activation	0.343	0.09	NaN	F10,ENO1,HP,SLC16A3,UCP2,HDAC3,SCARB1,GPS2,NCOA4
Semaphorin Signaling in Neurons	0.343	0.0943	NaN	DPYSL2,RHOG,CFL1,RND3,NRP1
Ceramide Biosynthesis	0.341	0.143	NaN	SPTSSA
Acetyl-CoA Biosynthesis I (Pyruvate Dehydrogenase Complex)	0.341	0.143	NaN	PDHB
SAPK/JNK Signaling	0.341	0.0893	1.265	MAP4K2,RAP2B,TP53,TRADD,RAC2,JUN,GADD45A,MAP3K1,MAP4K1,HNRNPK
Rac Signaling	0.339	0.0887	-0.302	RAP2B,RAF1,JUN,CYFIP2,CFL1,ARPC5L,MAP3K1,NCF2,CYBB,CD44,IQGAP1
Sonic Hedgehog Signaling	0.336	0.1	NaN	ARRB2,CDK1,CCNB1
ErbB2-ErbB3 Signaling	0.335	0.0909	0.447	MYC,RAP2B,RAF1,JUN,TYK2,STAT3,CDKN1B
CTLA4 Signaling in Cytotoxic T Lymphocytes	0.332	0.0891	NaN	AP1S1,AP2M1,AP1G2,HLA-A,CLTA,PPP2R5D,CD3D,AP2A2,AP2S1
Intrinsic Prothrombin Activation Pathway	0.331	0.0952	0	F10,PROS1,F5,F13A1
tRNA Splicing	0.331	0.0952	1	SMPDL3A,PDE2A,TSEN34,APEX1
Retinol Biosynthesis	0.331	0.0952	1	DHRS3,DHRS9,DHRS4,ESD
IGF-1 Signaling	0.33	0.0885	-0.816	YWHAQ,RAP2B,RAF1,PXN,JUN,YWHAE,YWHAH,YWHAB,SOCS6,STAT3
Docosahexaenoic Acid (DHA) Signaling	0.327	0.0926	NaN	IL1B,BID,CYCS,BAX,BCL2A1
ILK Signaling	0.323	0.0863	0.775	PXN,FN1,MYH9,CFL1,TNFRSF1A,PPP2R5D,VIM,ITGB7,MYC,ITGB2,RHOG,JUN,RND3,RPS6KA4,ACTG1,MMP9,NACA
Role of Hypercytokinemia/hyperchemokinemia in the Pathogenesis of Influenza	0.313	0.093	NaN	CCR1,IL36G,IL1RN,IL1B
Role of MAPK Signaling in the Pathogenesis of Influenza	0.311	0.0886	NaN	RAP2B,PLBD1,RAF1,BAX,MAPK13,PLA2G7,PAFAH1B3
Th17 Activation Pathway	0.31	0.0879	-0.707	HSP90B1,HSP90AB1,BATF,IL6R,TYK2,IL1B,HSP90AA1,STAT3
Histidine Degradation III	0.3	0.125	NaN	HAL
Tryptophan Degradation to 2-amino-3-carboxymuconate Semialdehyde	0.3	0.125	NaN	HAAO
Salvage Pathways of Pyrimidine Deoxyribonucleotides	0.3	0.125	NaN	TK1
Sphingomyelin Metabolism	0.3	0.125	NaN	SGMS2
Neuregulin Signaling	0.288	0.086	1.342	RAP2B,RPS6,MYC,RAF1,HSP90B1,HSP90AB1,HSP90AA1,CDKN1B
Role of IL-17F in Allergic Inflammatory Airway Diseases	0.282	0.0889	NaN	RAF1,IL1B,RPS6KA4,IL17RA
Cholecystokinin/Gastrin-mediated Signaling	0.27	0.0841	-1	RAP2B,RAF1,PXN,IL36G,JUN,RHOG,RND3,IL1RN,IL1B
Tight Junction Signaling	0.269	0.0833	NaN	MYH9,CLDN15,TNFRSF1A,PPP2R5D,CTNNA1,CDK4,GPAA1,NSF,JUN,CLDN1,NUDT21,GOSR2,ACTG1,VASP
Pathogenesis of Multiple Sclerosis	0.265	0.111	NaN	CCR1
Prostanoid Biosynthesis	0.265	0.111	NaN	PTGES3
Phosphatidylethanolamine Biosynthesis II	0.265	0.111	NaN	PCYT2
Leucine Degradation I	0.265	0.111	NaN	BCAT2
MIF-mediated Glucocorticoid Regulation	0.263	0.0882	NaN	MIF,CD14,CD74
Retinoate Biosynthesis I	0.263	0.0882	NaN	DHRS3,DHRS9,DHRS4
IL-4 Signaling	0.258	0.0833	NaN	RAP2B,HLA-DMA,HLA-A,HLA-DMB,TYK2,HLA-DQA1,HLA-DQB1,HLA-DRB5
nNOS Signaling in Neurons	0.254	0.0851	NaN	Calm1 (includes others),CAPN1,CAPN2,GRINA
Methionine Degradation I (to Homocysteine)	0.254	0.0909	NaN	MAT2A,AHCY
Differential Regulation of Cytokine Production in Intestinal Epithelial Cells by IL-17A and IL-17F	0.236	0.087	NaN	LCN2,IL1B
Calcium Transport I	0.236	0.1	NaN	ANXA5
Glycine Betaine Degradation	0.236	0.1	NaN	SHMT2
Cysteine Biosynthesis III (mammalia)	0.218	0.0833	NaN	MAT2A,AHCY
Cleavage and Polyadenylation of Pre-mRNA	0.188	0.0833	NaN	NUDT21
Acyl-CoA Hydrolysis	0.188	0.0833	NaN	ACOT7
Natural Killer Cell Signaling	0	0.0462	NaN	RAP2B,RAC2,RAF1,FCGR2A,HCST,FCGR3A/FCGR3B
Circadian Rhythm Signaling	0	0.0303	NaN	GRINA
Synaptic Long Term Potentiation	0	0.0476	0	RAP2B,RAF1,Calm1 (includes others),PDIA3,PPP1CA,GRINA
Axonal Guidance Signaling	0	0.0663	NaN	RAP2B,DPYSL2,RAC2,RAF1,TUBA1B,PFN1,PDIA3,MMP25,TUBB,BRCC3,ADAM8,EIF4E,TUBA8,MMP8,NTNG2,PSMD14,PLXNB2,VASP,MYL12A,PXN,CFL1,ARPC5L,TUBB4B,ADAM15,CXCR4,COPS5,TUBG1,TUBB2A,GNG10,TUBA1A,TUBB6,MMP9,NRP1
Fc Epsilon RI Signaling	0	0.0315	-1	RAP2B,RAC2,RAF1,MAPK13
Actin Cytoskeleton Signaling	0	0.0693	-0.535	RAP2B,RAF1,RAC2,PXN,MYH9,FN1,PFN1,CFL1,ARPC5L,ARHGEF1,GSN,IQGAP1,CYFIP2,CD14,ACTG1,MYL12A
Synaptic Long Term Depression	0	0.043	-0.378	RAP2B,PLBD1,RAF1,PDIA3,PPP2R5D,PLA2G7,PAFAH1B3,SLC39A7
PPARÎ±/RXRÎ± Activation	0	0.0753	0.277	RAP2B,RAF1,PDIA3,ADIPOR1,AP2A2,IL18RAP,IL1R2,ACADL,HSP90B1,JUN,HSP90AB1,IL1B,HSP90AA1,GOT2
Hepatic Cholestasis	0	0.0812	NaN	MAP4K2,IL1R2,IL36G,JUN,CYP27A1,TNFRSF1A,IL1RN,RARA,OSM,IL1B,CD14,HSD3B7,IL18RAP
FXR/RXR Activation	0	0.0556	NaN	IL36G,C3,SCARB1,CYP27A1,IL1RN,RARA,IL1B
Ceramide Signaling	0	0.0693	1.134	RAP2B,RAF1,JUN,TNFRSF1A,PPP2R5D,MAP3K1,CYCS
PXR/RXR Activation	0	0.0154	NaN	PAPSS2
RAR Activation	0	0.0579	NaN	DHRS3,JUN,DHRS9,DUSP1,RARA,MAP3K1,SMARCB1,MAPK13,RPL7A,PSMC5,PARP1
Erythropoietin Signaling	0	0.0341	NaN	RAP2B,RAF1,JUN
Î±-Adrenergic Signaling	0	0.0652	0	RAP2B,RAF1,Calm1 (includes others),GYS1,PYGL,GNG10
Activation of IRF by Cytosolic Pattern Recognition Receptors	0	0.0635	2	JUN,CD40,PPIB,MAVS
Clathrin-mediated Endocytosis Signaling	0	0.0766	NaN	AP2M1,ARPC5L,NUMB,RAB5B,AP2A2,AP2S1,ITGB7,AP1S1,HSPA8,ITGB2,ARRB2,AP1G2,CLTA,RPS27A,S100A8,ACTG1
IL-12 Signaling and Production in Macrophages	0	0.0405	NaN	JUN,CD40,IFNGR1,S100A8,IRF8,MAPK13
Role of RIG1-like Receptors in Antiviral Innate Immunity	0	0.0455	NaN	MAVS,CASP8
Role of Pattern Recognition Receptors in Recognition of Bacteria and Viruses	0	0.0719	-1.633	OAS1,C3,C5AR1,NLRP3,MAVS,OSM,IL1B,EIF2S1,OAS3,C3AR1
Role of NFAT in Regulation of the Immune Response	0	0.0829	1.807	RAP2B,RAF1,Calm1 (includes others),FCGR2A,HLA-A,CSNK1A1,HLA-DQA1,HLA-DQB1,CD3D,FCGR1A,GNG10,JUN,HLA-DMA,HLA-DMB,HLA-DRB5,FCGR3A/FCGR3B
FcÎ³RIIB Signaling in B Lymphocytes	0	0.0115	NaN	RAP2B
LPS-stimulated MAPK Signaling	0	0.0526	-0.447	RAP2B,RAF1,JUN,CD14,MAPK13
NF-ÎºB Activation by Viruses	0	0.0737	0.378	RAP2B,RAF1,ITGB2,MAP3K1,ITGA1,ITGAL,TNFRSF14
CCR5 Signaling in Macrophages	0	0.0638	NaN	JUN,Calm1 (includes others),MAPK13,CD3D,FAS,GNG10
CD40 Signaling	0	0.0617	0.447	JUN,ICAM1,CD40,STAT3,MAPK13
IL-3 Signaling	0	0.0444	0	RAP2B,RAF1,JUN,STAT3
Lymphotoxin Î² Receptor Signaling	0	0.0435	NaN	VCAM1,LTB,CYCS
IL-17 Signaling	0	0.043	NaN	RAP2B,JUN,MAPK13,IL17RA
fMLP Signaling in Neutrophils	0	0.0775	-0.378	RAP2B,RAF1,NCF1,Calm1 (includes others),ARPC5L,NCF2,FPR2,CYBB,GNG10,FPR1
CXCR4 Signaling	0	0.064	-1	RAP2B,RAF1,PXN,JUN,RHOG,RND3,CXCR4,EGR1,ELMO2,GNG10,MYL12A
4-1BB Signaling in T Lymphocytes	0	0.0625	NaN	JUN,MAPK13
Thrombopoietin Signaling	0	0.0694	0.447	MYC,RAP2B,RAF1,JUN,STAT3
IL-15 Production	0	0.0357	NaN	TYK2
IL-9 Signaling	0	0.0213	NaN	STAT3
CCR3 Signaling in Eosinophils	0	0.0438	NaN	RAP2B,RAF1,Calm1 (includes others),CFL1,MAPK13,GNG10
CD28 Signaling in T Helper Cells	0	0.0821	2	JUN,Calm1 (includes others),HLA-A,HLA-DMA,ARPC5L,MAP3K1,HLA-DMB,HLA-DQA1,HLA-DQB1,CD3D,HLA-DRB5
IL-15 Signaling	0	0.0714	NaN	RAP2B,RAF1,VCAM1,TYK2,STAT3,MAPK13
Role of Cytokines in Mediating Communication between Immune Cells	0	0.0556	NaN	IL36G,IL1RN,IL1B
Mechanisms of Viral Exit from Host Cells	0	0.0732	NaN	CHMP6,LMNB1,ACTG1
Melatonin Signaling	0	0.0417	NaN	RAF1,Calm1 (includes others),PDIA3
Angiopoietin Signaling	0	0.0233	NaN	RAP2B,BIRC5
Cellular Effects of Sildenafil (Viagra)	0	0.0458	NaN	PDE2A,Calm1 (includes others),MYH9,PDIA3,ACTG1,MYL12A
Neuropathic Pain Signaling In Dorsal Horn Neurons	0	0.0256	NaN	CAMK1,PDIA3,GRINA
Endothelin-1 Signaling	0	0.0704	0.832	MYC,PLD4,PLBD1,RAP2B,CASP6,RAF1,JUN,PDIA3,EDNRA,ECE1,MAPK13,CASP8,PLA2G7,PAFAH1B3
Relaxin Signaling	0	0.0429	NaN	SMPDL3A,PDE2A,JUN,APEX1,MMP9,GNG10,SLC39A7
CNTF Signaling	0	0.0704	0.447	RAP2B,RAF1,TYK2,RPS6KA4,STAT3
Renin-Angiotensin Signaling	0	0.0462	0.447	RAP2B,RAF1,JUN,MAP3K1,STAT3,MAPK13
Thrombin Signaling	0	0.0474	-0.707	RAP2B,RAF1,RHOG,CAMK1,RND3,PDIA3,ARHGEF1,MAPK13,GNG10,MYL12A
Cardiac Hypertrophy Signaling	0	0.0661	0.258	RAP2B,RAF1,Calm1 (includes others),PDIA3,MAP3K1,IL6R,MAPK13,EIF2B2,EIF4E,GNG10,RHOG,JUN,RND3,EIF2B1,ADRB2,MYL12A
CDK5 Signaling	0	0.0667	-0.378	RAP2B,RAF1,PPP2R5D,CAPN1,EGR1,MAPK13,PPP1CA
iCOS-iCOSL Signaling in T Helper Cells	0	0.072	2.828	Calm1 (includes others),CD40,HLA-A,HLA-DMA,HLA-DMB,HLA-DQA1,HLA-DQB1,CD3D,HLA-DRB5
Molecular Mechanisms of Cancer	0	0.0711	NaN	TP53,RAP2B,RAC2,RAF1,PA2G4,HAT1,TYK2,CTNNA1,CDK4,ARHGEF1,BAX,AURKA,MAPK13,CDK1,FAS,MYC,CASP6,CDKN2D,MAX,RHOG,JUN,RND3,APH1A,CDKN1A,BID,CYCS,CDKN1B,CASP8
Corticotropin Releasing Hormone Signaling	0	0.042	NaN	RAF1,JUN,Calm1 (includes others),NR4A1,MAPK13,SLC39A7
HGF Signaling	0	0.0579	-0.378	RAP2B,RAF1,PXN,JUN,MAP3K1,CDKN1A,STAT3
Maturity Onset Diabetes of Young (MODY) Signaling	0	0.0476	NaN	GAPDH
FLT3 Signaling in Hematopoietic Progenitor Cells	0	0.0652	0	RAP2B,RAF1,RPS6KA4,STAT3,MAPK13,EIF4E
GNRH Signaling	0	0.0471	-0.378	RAP2B,RAF1,PXN,JUN,Calm1 (includes others),EGR1,MAP3K1,MAPK13
Human Embryonic Stem Cell Pluripotency	0	0.0069	NaN	INHBA
Melanocyte Development and Pigmentation Signaling	0	0.0286	NaN	RAP2B,RAF1,RPS6KA4
Antiproliferative Role of Somatostatin Receptor 2	0	0.0575	NaN	RAP2B,CDKN1A,CDKN1B,SLC39A7,GNG10
Role of NANOG in Mammalian Embryonic Stem Cell Pluripotency	0	0.0385	-0.447	RAP2B,TP53,RAF1,TYK2,STAT3
Growth Hormone Signaling	0	0.0349	NaN	SOCS6,RPS6KA4,STAT3
Prolactin Signaling	0	0.0659	0	MYC,RAP2B,RAF1,JUN,SOCS6,STAT3
CREB Signaling in Neurons	0	0.0548	1	RAP2B,POLR2I,RAF1,POLR2F,Calm1 (includes others),POLR2D,POLR2C,POLR2E,PDIA3,POLR2J,POLR2H,GNG10
Melanoma Signaling	0	0.0794	-0.447	RAP2B,TP53,RAF1,CDKN1A,CDK4
Renal Cell Carcinoma Signaling	0	0.0556	NaN	RAP2B,RAF1,JUN,RPS27A,FH
Endometrial Cancer Signaling	0	0.0694	0	MYC,RAP2B,TP53,RAF1,CTNNA1
Basal Cell Carcinoma Signaling	0	0.0139	NaN	TP53
Primary Immunodeficiency Signaling	0	0.06	NaN	CD40,TNFRSF13B,CD3D
Thyroid Cancer Signaling	0	0.0652	NaN	TP53,MYC,RAP2B
Type II Diabetes Mellitus Signaling	0	0.0452	1	TRADD,TNFRSF1A,MAP3K1,SOCS6,ADIPOR1,ACSL1,SLC27A4
Chronic Myeloid Leukemia Signaling	0	0.0796	NaN	MYC,RAP2B,TP53,RAF1,HDAC3,PA2G4,CDKN1A,CDK4,CDKN1B
Non-Small Cell Lung Cancer Signaling	0	0.0706	0	RAP2B,TP53,RAF1,PA2G4,CDK4,RASSF1
GÎ±12/13 Signaling	0	0.049	-0.378	RAP2B,RAF1,PXN,JUN,MAP3K1,ARHGEF1,MYL12A
p70S6K Signaling	0	0.0786	1.134	RPS6,YWHAQ,RAP2B,RAF1,YWHAE,YWHAH,PDIA3,EEF2,YWHAB,PPP2R5D,BCAP31
Colorectal Cancer Metastasis Signaling	0	0.0667	0	RAP2B,TP53,TNFRSF1A,TYK2,IL6R,IFNGR1,BAX,STAT3,MMP25,BIRC5,GNG10,MYC,JUN,RHOG,RND3,MMP8,MMP9
G Beta Gamma Signaling	0	0.0252	NaN	RAP2B,RAF1,GNG10
G Protein Signaling Mediated by Tubby	0	0.0323	NaN	GNG10
Sphingosine-1-phosphate Signaling	0	0.0556	-0.447	CASP6,ACER3,RHOG,RND3,PDIA3,CASP8,ASAH1
FAK Signaling	0	0.0561	NaN	RAP2B,RAF1,PXN,CAPN1,CAPN2,ACTG1
AMPK Signaling	0	0.0548	-2.53	CCNA2,RAB27A,GYS1,EEF2,PPP2R5D,CDKN1A,SMARCB1,MAPK13,MLST8,PPM1G,RAB6A,ADRB2
PAK Signaling	0	0.0459	-1	RAP2B,RAF1,PXN,CFL1,MYL12A
RhoA Signaling	0	0.0813	-0.632	SEPT5,PFN1,CFL1,RND3,ARPC5L,ARHGEF1,ACTG1,SEPT1,SEPT2,MYL12A
Role of Osteoblasts, Osteoclasts and Chondrocytes in Rheumatoid Arthritis	0	0.0511	NaN	IL1R2,TRADD,IL36G,JUN,Calm1 (includes others),IL1RN,TNFRSF1A,MMP8,CSNK1A1,IL1B,GSN,IL18RAP
Phospholipase C Signaling	0	0.0574	0	PEBP1,RAP2B,RAF1,Calm1 (includes others),FCGR2A,ARHGEF1,CD3D,GNG10,PLD4,HDAC3,RHOG,RND3,AHNAK,MYL12A
Ovarian Cancer Signaling	0	0.053	-0.447	RAP2B,TP53,RAF1,PA2G4,CDK4,CD44,EDNRA,MMP9
HER-2 Signaling in Breast Cancer	0	0.0625	NaN	RAP2B,TP53,ITGB2,CDKN1A,CDKN1B,ITGB7
Estrogen-Dependent Breast Cancer Signaling	0	0.0575	NaN	RAP2B,HSD17B10,JUN,HSD17B12,HSD17B4
Leptin Signaling in Obesity	0	0.0227	NaN	PDIA3,STAT3
Role of NFAT in Cardiac Hypertrophy	0	0.0442	0.378	RAP2B,RAF1,Calm1 (includes others),CAMK1,HDAC3,PDIA3,MAP3K1,CSNK1A1,MAPK13,GNG10
Glioma Invasiveness Signaling	0	0.0769	-0.816	RAP2B,RHOG,RND3,CD44,PLAUR,MMP9
IL-1 Signaling	0	0.044	NaN	JUN,MAP3K1,MAPK13,GNG10
RANK Signaling in Osteoclasts	0	0.0577	0	RAF1,JUN,Calm1 (includes others),MAP3K1,MAPK13,GSN
Glioblastoma Multiforme Signaling	0	0.0588	0.333	MYC,RAP2B,TP53,RAF1,RHOG,RND3,PDIA3,CDKN1A,CDK4,CDKN1B
Neuroprotective Role of THOP1 in Alzheimer's Disease	0	0.0667	NaN	PREP,HLA-G,PRSS57,YWHAE,HLA-A,ECE1,MMP9,HLA-E
Regulation of IL-2 Expression in Activated and Anergic T Lymphocytes	0	0.0698	NaN	RAP2B,RAF1,JUN,Calm1 (includes others),MAP3K1,CD3D
Role of Wnt/GSK-3Î² Signaling in the Pathogenesis of Influenza	0	0.026	NaN	CSNK1A1,NCOA4
PKCÎ¸ Signaling in T Lymphocytes	0	0.0659	2.111	RAP2B,RAC2,JUN,HLA-A,HLA-DMA,MAP3K1,HLA-DMB,HLA-DQA1,HLA-DQB1,CD3D,HLA-DRB5
Role of Lipids/Lipid Rafts in the Pathogenesis of Influenza	0	0.0435	NaN	FDPS
TNFR2 Signaling	0	0.0667	NaN	JUN,MAP3K1
Role of PI3K/AKT Signaling in the Pathogenesis of Influenza	0	0.0125	NaN	PLAC8
MSP-RON Signaling Pathway	0	0.0541	NaN	ITGB2,ITGAM,CCR2,ACTG1
PI3K Signaling in B Lymphocytes	0	0.0815	1.897	RAP2B,CD81,RAF1,JUN,Calm1 (includes others),C3,ATF3,CD180,CD40,PDIA3,ATF6B
P2Y Purigenic Receptor Signaling Pathway	0	0.05	1.633	MYC,RAP2B,RAF1,JUN,PDIA3,P2RY6,GNG10
DNA Double-Strand Break Repair by Homologous Recombination	0	0.0714	NaN	RPA1
Assembly of RNA Polymerase III Complex	0	0.0769	NaN	GTF3A
DNA Double-Strand Break Repair by Non-Homologous End Joining	0	0.0714	NaN	PARP1
IL-17A Signaling in Airway Cells	0	0.05	-1	TYK2,STAT3,MAPK13,IL17RA
Role of IL-17A in Arthritis	0	0.0286	NaN	MAPK13,IL17RA
Differential Regulation of Cytokine Production in Macrophages and T Helper Cells by IL-17A and IL-17F	0	0.0556	NaN	IL1B
Role of JAK1 and JAK3 in Î³c Cytokine Signaling	0	0.0256	NaN	RAP2B,STAT3
Actin Nucleation by ARP-WASP Complex	0	0.0806	0.447	RAP2B,RHOG,RND3,ARPC5L,VASP
Dopamine-DARPP32 Feedback in cAMP Signaling	0	0.0368	0.816	Calm1 (includes others),PDIA3,PPP2R5D,CSNK1A1,PPP1CA,GRINA
NGF Signaling	0	0.056	1.134	RAP2B,TP53,RAF1,RHOG,MAP3K1,RPS6KA4,BAX
Paxillin Signaling	0	0.0744	0	RAP2B,ITGB2,PXN,ITGAM,ITGA1,MAPK13,ITGAL,ACTG1,ITGB7
Signaling by Rho Family GTPases	0	0.0714	-1	RAF1,SEPT5,CFL1,ARPC5L,VIM,ARHGEF1,IQGAP1,SEPT1,GNG10,STMN1,RHOG,JUN,RND3,NCF2,CYBB,ACTG1,SEPT2,MYL12A
RhoGDI Signaling	0	0.0743	0.577	GDI1,CFL1,ARPC5L,GDI2,ARHGEF1,ARHGDIB,GNG10,RHOG,RND3,CD44,ARHGDIA,ACTG1,MYL12A
Gap Junction Signaling	0	0.0673	NaN	RAP2B,RAF1,TUBA1B,TUBA1A,TUBA8,TUBB6,TUBB4B,PDIA3,TUBG1,TUBB2A,CSNK1A1,TUBB,ACTG1,SLC39A7
Telomere Extension by Telomerase	0	0.0667	NaN	HNRNPA2B1
Mouse Embryonic Stem Cell Pluripotency	0	0.0614	-0.378	RAP2B,MYC,TP53,RAF1,TYK2,MAPK13,STAT3
Hematopoiesis from Pluripotent Stem Cells	0	0.0204	NaN	CD3D
Transcriptional Regulatory Network in Embryonic Stem Cells	0	0.0741	NaN	SET,HIST1H4A,H3F3A/H3F3B,STAT3
eNOS Signaling	0	0.0747	-1.667	Calm1 (includes others),HSPA1A/HSPA1B,HSPA9,HSPA5,HSPA8,HSPA4,CCNA2,HSP90B1,NOSIP,HSP90AB1,STUB1,HSP90AA1,CASP8
nNOS Signaling in Skeletal Muscle Cells	0	0.0244	NaN	Calm1 (includes others)
VEGF Family Ligand-Receptor Interactions	0	0.0312	NaN	RAP2B,RAF1,NRP1
Ephrin A Signaling	0	0.0161	NaN	CFL1
ErbB Signaling	0	0.0377	0	RAP2B,RAF1,JUN,MAPK13
ErbB4 Signaling	0	0.0375	NaN	RAP2B,RAF1,APH1A
GDNF Family Ligand-Receptor Interactions	0	0.0595	0	RAP2B,RAF1,JUN,PDLIM7,DOK3
Netrin Signaling	0	0.0154	NaN	RAC2
Heparan Sulfate Biosynthesis	0	0.0602	0.447	EXT2,TARS2,CHST12,CHST15,AARSD1
Thyroid Hormone Metabolism II (via Conjugation and/or Degradation)	0	0.0465	NaN	EXT2,Ugt1a7c
NAD biosynthesis II (from tryptophan)	0	0.0667	NaN	HAAO
Nicotine Degradation III	0	0.0357	NaN	EXT2,Ugt1a7c
Heparan Sulfate Biosynthesis (Late Stages)	0	0.0658	0.447	EXT2,TARS2,CHST12,CHST15,AARSD1
Ubiquinol-10 Biosynthesis (Eukaryotic)	0	0.0556	NaN	BCKDHA
Melatonin Degradation I	0	0.0308	NaN	EXT2,Ugt1a7c
NAD Salvage Pathway II	0	0.0769	NaN	NT5E,NT5C
Triacylglycerol Degradation	0	0.0741	1	ABHD12,TARS2,MGLL,AARSD1
D-myo-inositol (1,4,5)-Trisphosphate Biosynthesis	0	0.037	NaN	PLD4
Phospholipases	0	0.0794	0.447	PLD4,PLBD1,PDIA3,PLA2G7,PAFAH1B3
Choline Biosynthesis III	0	0.0769	NaN	PLD4
Estrogen Biosynthesis	0	0.0732	NaN	HSD17B10,HSD17B12,HSD17B4
Oleate Biosynthesis II (Animals)	0	0.0769	NaN	UFSP2
Chondroitin Sulfate Biosynthesis	0	0.0351	NaN	CHST12,CHST15
Dermatan Sulfate Biosynthesis	0	0.0339	NaN	CHST12,CHST15
NAD Phosphorylation and Dephosphorylation	0	0.0769	NaN	NADK
Dermatan Sulfate Biosynthesis (Late Stages)	0	0.0435	NaN	CHST12,CHST15
Nicotine Degradation II	0	0.0308	NaN	EXT2,Ugt1a7c
Superpathway of Inositol Phosphate Compounds	0	0.0675	3	NUDT9,PPP2R5D,MDP1,NUDT14,IGBP1,NT5C,PLD4,NUDT5,SET,PTPRO,DUSP1,NUDT4,PPP1CA,DUSP12,PPP5C,SIRPA
3-phosphoinositide Biosynthesis	0	0.0743	2.84	NUDT9,PPP2R5D,MDP1,NUDT14,NT5C,IGBP1,NUDT5,SET,PTPRO,DUSP1,NUDT4,DUSP12,PPP1CA,PPP5C,SIRPA
Chondroitin Sulfate Biosynthesis (Late Stages)	0	0.0408	NaN	CHST12,CHST15
Superpathway of Melatonin Degradation	0	0.0286	NaN	EXT2,Ugt1a7c
Histidine Degradation VI	0	0.0667	NaN	HAL
Acetone Degradation I (to Methylglyoxal)	0	0.0333	NaN	FAM213B
Superpathway of Methionine Degradation	0	0.0811	NaN	MAT2A,GOT2,AHCY
Antioxidant Action of Vitamin C	0	0.0826	0	PLD4,PLBD1,PDIA3,MAPK13,GLRX,PLA2G7,GSTO1,SLC2A3,PAFAH1B3
GÎ±i Signaling	0	0.0738	-2.121	RAP2B,RAF1,LTB4R,CXCR2,RGS10,FPR2,STAT3,GNG10,FPR1
GÎ±q Signaling	0	0.0432	0.816	PLD4,RAF1,RHOG,Calm1 (includes others),GYS1,RND3,GNG10
GÎ±s Signaling	0	0.0374	NaN	HCK,ADORA2B,ADRB2,GNG10
Inhibition of Matrix Metalloproteases	0	0.0769	NaN	MMP8,MMP25,MMP9
PEDF Signaling	0	0.0632	0	RAP2B,TP53,RAF1,MAPK13,CASP8,FAS
Regulation of the Epithelial-Mesenchymal Transition Pathway	0	0.0406	NaN	RAP2B,RAF1,EGR1,APH1A,ZEB2,TYK2,STAT3,MMP9
Role of p14/p19ARF in Tumor Suppression	0	0.0667	NaN	TP53,NPM1,NPM3
Sperm Motility	0	0.0469	0	PLBD1,PDE2A,Calm1 (includes others),PDIA3,PLA2G7,PAFAH1B3
Tec Kinase Signaling	0	0.0526	-0.707	RHOG,RND3,TYK2,HCK,STAT3,ACTG1,FGR,FAS,GNG10
UVA-Induced MAPK Signaling	0	0.0796	NaN	RAP2B,TP53,JUN,PDIA3,PARP2,CYCS,RPS6KA4,MAPK13,PARP1
UVB-Induced MAPK Signaling	0	0.0735	1	TP53,JUN,H3F3A/H3F3B,MAPK13,EIF4E
Adipogenesis pathway	0	0.0746	NaN	TP53,HDAC3,TXNIP,HAT1,TNFRSF1A,AGPAT2,CEBPD,XBP1,RBBP7,BSCL2
PCP pathway	0	0.0492	NaN	JUN,PFN1,JUNB
Wnt/Ca+ pathway	0	0.0161	NaN	PDIA3
EGF Signaling	0	0.0714	-0.447	RAF1,JUN,MAP3K1,STAT3,MAPK13
ERK/MAPK Signaling	0	0.0732	0	RAP2B,RAF1,RAC2,PXN,YWHAH,YWHAB,PPP2R5D,STAT3,EIF4E,YWHAQ,MYC,H3F3A/H3F3B,DUSP1,RPS6KA4,PPP1CA
PTEN Signaling	0	0.0569	-0.378	RAP2B,RAC2,RAF1,YWHAH,CDKN1A,CDKN1B,MCRS1
Nitric Oxide Signaling in the Cardiovascular System	0	0.0522	2.236	PDE2A,HSP90B1,Calm1 (includes others),HSP90AB1,HSP90AA1,ARG2
Cardiac Î²-adrenergic Signaling	0	0.05	-0.816	SMPDL3A,PDE2A,PPP2R5D,PPP1CA,APEX1,GNG10,PKIG
IL-2 Signaling	0	0.0417	NaN	RAP2B,RAF1,JUN
FGF Signaling	0	0.0435	-1	RAF1,MAP3K1,STAT3,MAPK13
JAK/Stat Signaling	0	0.0769	-0.378	RAP2B,RAF1,JUN,SOCS6,CDKN1A,TYK2,STAT3
GABA Receptor Signaling	0	0.0737	NaN	NSF,AP2M1,AP1G2,RPS27A,AP2A2,ALDH9A1,AP2S1
B Cell Receptor Signaling	0	0.067	-0.577	RAP2B,RAC2,RAF1,Calm1 (includes others),CFL1,FCGR2A,EGR1,MAP3K1,MAPK13,BCL6,JUN,PAG1,BCL2A1
Wnt/Î²-catenin Signaling	0	0.064	0.632	MYC,TP53,JUN,RARA,PPP2R5D,CSNK1A1,CD44,RPS27A,RUVBL2,MAP4K1,SOX13
Serotonin Receptor Signaling	0	0.0465	NaN	SPR,QDPR
Insulin Receptor Signaling	0	0.0476	1.134	RAP2B,RAF1,GYS1,EIF2B1,PPP1CA,EIF2B2,EIF4E
Phototransduction Pathway	0	0.0189	NaN	GNGT2
Neurotrophin/TRK Signaling	0	0.0357	NaN	RAP2B,RAF1,JUN
Dopamine Receptor Signaling	0	0.0649	NaN	PPP2R5D,COMT,SPR,PPP1CA,QDPR
cAMP-mediated signaling	0	0.0705	-1.5	SMPDL3A,RAF1,PDE2A,Calm1 (includes others),CAMK1,FPR2,STAT3,FPR1,LTB4R,DUSP1,CXCR2,RGS10,ADORA2B,APEX1,ADRB2,PKIG
Glutamate Receptor Signaling	0	0.0351	NaN	Calm1 (includes others),GRINA
TGF-Î² Signaling	0	0.0645	0	RAP2B,RAF1,JUN,MAP4K1,MAPK13,INHBA
Notch Signaling	0	0.0526	NaN	APH1A,NUMB
NF-ÎºB Signaling	0	0.0695	-0.277	IL1R2,RAP2B,RAF1,TRADD,IL36G,CD40,TNFRSF1A,IL1RN,UBE2V1,MAP3K1,IL1B,CASP8,TNFSF13B
T Cell Receptor Signaling	0	0.0598	NaN	RAP2B,RAF1,JUN,Calm1 (includes others),PAG1,MAP3K1,CD3D
G-Protein Coupled Receptor Signaling	0	0.0495	NaN	SMPDL3A,RAP2B,RAF1,PDE2A,FPR2,STAT3,FPR1,LTB4R,DUSP1,CXCR2,RGS10,ADORA2B,APEX1,ADRB2
PDGF Signaling	0	0.0714	1.134	RAP2B,MYC,RAF1,JUN,MAP3K1,TYK2,STAT3
BMP signaling pathway	0	0.0488	0	RAP2B,RAF1,JUN,MAPK13
GPCR-Mediated Integration of Enteroendocrine Signaling Exemplified by an L Cell	0	0.0274	NaN	PDIA3,ADRB2
GPCR-Mediated Nutrient Sensing in Enteroendocrine Cells	0	0.0268	NaN	PDIA3,FFAR2,GNG10
Gustation Pathway	0	0.039	NaN	SMPDL3A,PDE2A,P2RY6,P2RX4,APEX1,P2RX7
Macropinocytosis Signaling	0	0.0449	NaN	RAP2B,ITGB2,CD14,ITGB7
Cancer Drug Resistance By Drug Efflux	0	0.0545	NaN	TP53,RAP2B,RAF1
Osteoarthritis Pathway	0	0.0711	-0.632	FN1,TNFRSF1A,CTNNA1,IL18RAP,IL1R2,CASP6,HDAC3,S100A9,CXCR2,ANXA5,IL1B,S100A8,CASP8,P2RX7,MMP9
GP6 Signaling Pathway	0	0.0148	NaN	RHOG,Calm1 (includes others)
IL-7 Signaling Pathway	0	0.0645	-0.447	MYC,JUN,BAX,CDKN1B,MAPK13,BCL6
Opioid Signaling Pathway	0	0.0772	0.243	RAP2B,SIGMAR1,RAC2,RAF1,AP2M1,CAMK1,Calm1 (includes others),AP2A2,AP2S1,GRINA,MYC,ARRB2,AP1G2,CLTA,RGS10,HCK,RPS6KA4,CDKN1B,FGR
Adrenomedullin signaling pathway	0	0.0676	0.277	RAP2B,CRCP,RAF1,Calm1 (includes others),C3,PDIA3,BAX,MAPK13,IL36G,MAX,IL1RN,IL1B,CFH,SLC39A7
SPINK1 Pancreatic Cancer Pathway	0	0.05	NaN	CPQ,CTSA,CTSB
SPINK1 General Cancer Pathway	0	0.0732	0	RAP2B,RAF1,TYK2,IL6R,STAT3,Mt1
Endocannabinoid Developing Neuron Pathway	0	0.0625	-0.707	RAP2B,RAF1,RAC2,MGLL,MAPK13,CDKN1B,STAT3,MLST8
Endocannabinoid Cancer Inhibition Pathway	0	0.0696	0.302	MYC,RAF1,CASP6,ATF3,CDKN1A,NUPR1,VIM,CDKN1B,CASP8,MLST8,EIF2A
Apelin Liver Signaling Pathway	0	0.0385	NaN	FAS
Apelin Cardiomyocyte Signaling Pathway	0	0.0348	0	PDIA3,CAT,MAPK13,MYL12A
Apelin Endothelial Signaling Pathway	0	0.0472	0.816	RAP2B,RAF1,VCAM1,JUN,Calm1 (includes others),ICAM1
Calcium Signaling	0	0.0485	0	RAP2B,CALR,Calm1 (includes others),LETM1,CAMK1,HDAC3,MYH9,Tpm1,MCU,GRINA
GM-CSF Signaling	0	0.0617	-1.342	RAP2B,RAF1,HCK,STAT3,BCL2A1
Ephrin Receptor Signaling	0	0.0621	-0.905	RAP2B,RAF1,RAC2,PXN,CFL1,CXCR4,ARPC5L,SH2D3C,STAT3,GNG10,GRINA

## Sheet: C4 vs C0,1,3,5
Supplementary Table 6c: Ingenuity Pathway Analysis of Cluster 4 macrophages compared to Cluster 0, 1 and 3 macrophages
Ingenuity Canonical Pathways	-log(p-value)	Ratio	z-score	Molecules
EIF2 Signaling	25.1	0.227	4.95	RPL11,RAF1,RPS23,EIF4A2,RPL35A,HSPA5,RPS11,RPS7,RPL13,RPS13,RPL19,RPS2,ATF3,RPL3,RRAS,RPS8,RPL37A,RAP1A,EIF2S2,RPL10A,RPS6,RPL8,PPP1R15A,RPL10,RPL6,RPL13A,RPL41,RAP1B,Rpl36a,RPL26,RPL7,BCL2,RPS28,RPL14,RPL27A,RPL35,RPL18A,RPS5,MAP2K1,RPS24,RPS19,RPL4,RPL17,RPS29,FAU,EIF3F,RPS4Y1,RPS26,EIF4A1,RPS27A,RPS14,RPLP0
Regulation of eIF4 and p70S6K Signaling	11.2	0.176	2.828	RAP1B,RAF1,RPS23,EIF4A2,MAPK13,RPS11,RPS7,RPS28,RPS13,RPS2,RPS5,MAP2K1,ITGA4,RPS24,ITGB1,RPS19,RRAS,RPS8,RAP1A,RPS29,EIF2S2,FAU,RPS6,RPS4Y1,EIF3F,RPS26,EIF4A1,RPS27A,RPS14
B Cell Receptor Signaling	8.82	0.144	3.272	RAP1B,RAF1,RAC2,Calm1 (includes others),PTK2B,POU2F2,ABL1,MAPK13,BCL6,NFKB1,PTPRC,IKBKB,JUN,CAMK2D,RASSF5,MAP2K1,PTPN6,RRAS,CSK,MAP3K1,NFKB2,RAP1A,INPP5F,LYN,MEF2C,MAP3K8,PIK3AP1,BCL2A1
mTOR Signaling	8.76	0.139	2.333	RAP1B,RPS23,FKBP1A,EIF4A2,PRR5L,RPS11,RPS7,RPS28,RPS13,RPS2,RPS5,RPS24,RPS19,RRAS,RPS8,RAP1A,MLST8,RPS29,FAU,RPS6,PLD4,EIF3F,RPS4Y1,RPS26,RHOA,EIF4A1,RPS27A,PRKCH,RPS14
PPAR Signaling	7.32	0.178	-1.886	RAP1B,PPARG,RAF1,RRAS,NFKB2,NFKB1,RAP1A,IL18RAP,IL1R2,IKBKB,IL36G,JUN,HSP90AB1,IL1RN,TNFRSF1B,STAT5B,MAP2K1,CITED2
Leukocyte Extravasation Signaling	7.31	0.127	1.46	RAP1B,RAC2,SPN,PTK2B,ABL1,MAPK13,MMP25,MMP8,CYBB,RASSF5,VCL,VASP,ITGA4,ITGB1,VCAM1,CXCR4,ITGAL,RAP1A,GNAI3,NCF1,CLDN1,RASGRP1,RHOA,PECAM1,PRKCH,MMP9,MSN
Glucocorticoid Receptor Signaling	7.2	0.104	NaN	RAP1B,RAF1,TGFBR1,SGK1,POU2F2,Hspa1b,HSPA1A/HSPA1B,SLPI,MAPK13,NFKB1,GTF2A1,HSPA5,FCGR1A,BCL2,TGFBR2,IL1R2,CXCL3,IKBKB,JUN,HSP90AB1,ANXA1,STAT5B,MAP2K1,ADRB2,VCAM1,RRAS,MAP3K1,KRT80,RAP1A,CD3D,NCOA3,HSPA8,IL1RN,DUSP1,POLR2E,CDKN1A
IL-8 Signaling	7.11	0.127	1.225	RAP1B,RAF1,RAC2,PTK2B,NFKB1,BCL2,IKBKB,JUN,CCND3,CXCR2,ITGAV,CYBB,MAP2K1,LASP1,VASP,VCAM1,RRAS,BAX,RAP1A,PLD4,GNAI3,ARRB2,RHOA,PRKCH,MMP9,ITGAX
Apoptosis Signaling	6.91	0.177	-2.183	RAP1B,NAIP,RAF1,Naip1 (includes others),RRAS,BAX,NFKB2,NFKB1,RAP1A,BCL2,IKBKB,CAPN1,HTRA2,CAPN2,TNFRSF1B,BCL2A1,MAP2K1
Protein Kinase A Signaling	6.6	0.0952	0.87	RAP1B,RAF1,TGFBR1,Calm1 (includes others),AKAP8,PTK2B,DUSP22,ANAPC10,NFKB1,DUSP2,TGFBR2,PTPRC,DUSP5,CAMK2D,DUSP3,PTPRJ,PTPRO,SMPDL3B,MAP2K1,VASP,SMPDL3A,PDE2A,PTPN6,YWHAG,MAP3K1,YWHAZ,PYGL,NFKB2,RAP1A,GNAI3,DUSP1,RHOA,ADD1,PRKCH,ADCY7,TCF7L2,SIRPA,DUSP16
Role of Macrophages, Fibroblasts and Endothelial Cells in Rheumatoid Arthritis	6.5	0.102	NaN	RAP1B,SOCS3,RAF1,Calm1 (includes others),CSNK1A1,CEBPD,NFKB1,IL17RA,FCGR1A,IL1R2,IKBKB,IL36G,CAMK2D,JUN,TLR7,OSM,TNFRSF1B,MAP2K1,FCGR3A/FCGR3B,TRAF1,VCAM1,C5AR1,RRAS,IL6R,RAP1A,CEBPE,IL18RAP,IL1RN,RHOA,Tlr13,PRKCH,LRP1,TCF7L2
Granulocyte Adhesion and Diapedesis	6.38	0.128	NaN	ITGB1,VCAM1,SELL,C5AR1,CXCR4,MMP25,ITGAL,IL18RAP,Ccl9,FPR1,IL1R2,GNAI3,CXCL3,IL36G,CLDN1,IL1RN,CXCR2,MMP8,PECAM1,TNFRSF1B,MMP9,MSN,ITGA4
STAT3 Pathway	6.18	0.144	1.508	RAP1B,RAF1,SOCS3,PTPN6,TGFBR1,IL13RA1,RRAS,IL6R,MAPK13,IL17RA,RAP1A,BCL2,IL18RAP,IL1R2,TGFBR2,CXCR2,CDKN1A,IL10RA,MAP2K1
Regulation of IL-2 Expression in Activated and Anergic T Lymphocytes	6.08	0.174	NaN	RAP1B,RAF1,FYN,TGFBR1,Calm1 (includes others),RRAS,MAP3K1,NFKB2,NFKB1,RAP1A,CD3D,TGFBR2,IKBKB,JUN,MAP2K1
PI3K Signaling in B Lymphocytes	6.02	0.141	3.9	RAP1B,FYN,RAF1,Calm1 (includes others),ATF3,C3,RRAS,ABL1,NFKB2,NFKB1,RAP1A,PTPRC,IKBKB,JUN,CAMK2D,CD180,LYN,PIK3AP1,MAP2K1
Acute Phase Response Signaling	5.97	0.125	1.091	RAP1B,RAF1,SOCS3,C3,RRAS,MAP3K1,IL6R,MAPK13,NFKB2,NFKB1,RAP1A,IKBKB,FTL,HP,IL36G,JUN,TF,IL1RN,OSM,LBP,TNFRSF1B,MAP2K1
Unfolded protein response	5.97	0.214	NaN	HSPA8,PPARG,Hspa1b,HSPA1A/HSPA1B,PPP1R15A,CEBPD,XBP1,CANX,HSPA5,NFE2L2,BCL2,CEBPE
TNFR2 Signaling	5.94	0.3	1.667	NAIP,IKBKB,Naip1 (includes others),JUN,MAP3K1,NFKB2,NFKB1,TNFRSF1B,TRAF1
Chronic Myeloid Leukemia Signaling	5.86	0.15	NaN	RAP1B,RAF1,RBL2,TGFBR1,TFDP1,RRAS,ABL1,NFKB2,NFKB1,RAP1A,TGFBR2,IKBKB,CDKN1A,CDKN1B,STAT5B,MAP2K1,E2F2
Molecular Mechanisms of Cancer	5.86	0.0914	NaN	RAP1B,RAC2,FYN,RAPGEF1,RAF1,Naip1 (includes others),TGFBR1,ABL1,ARHGEF1,MAPK13,NFKB1,BCL2,TGFBR2,CAMK2D,JUN,CCND3,ARHGEF3,MAP2K1,E2F2,ITGA4,ITGB1,NAIP,TFDP1,RRAS,NFKB2,BAX,RAP1A,GNAI3,MAX,RASGRP1,RHOA,CDKN1A,PRKCH,CDKN1B,ADCY7,LRP1
Role of NFAT in Regulation of the Immune Response	5.84	0.119	3.545	RAP1B,FYN,RAF1,Calm1 (includes others),RRAS,HLA-A,MEF2A,CSNK1A1,NFKB2,NFKB1,FCGR1A,CD3D,RAP1A,RCAN1,IKBKB,GNAI3,JUN,HLA-DMA,FCER1G,LYN,MEF2C,MAP2K1,FCGR3A/FCGR3B
IL-10 Signaling	5.74	0.188	NaN	CCR1,IL1R2,SOCS3,IKBKB,IL36G,JUN,IL1RN,IL10RA,LBP,NFKB2,MAPK13,NFKB1,IL18RAP
Production of Nitric Oxide and Reactive Oxygen Species in Macrophages	5.73	0.117	2.683	RAP1B,APOE,PTPN6,MAP3K1,APOC2,IFNGR1,MAPK13,NFKB2,NFKB1,RAP1A,IKBKB,NCF1,JUN,RHOA,CAT,CYBB,S100A8,MAP3K8,PRKCH,IRF8,TNFRSF1B,MAP2K1,SIRPA
PI3K/AKT Signaling	5.68	0.14	2.828	RAP1B,ITGB1,RAF1,YWHAG,RRAS,YWHAZ,NFKB2,NFKB1,RAP1A,BCL2,IKBKB,INPP5F,HSP90AB1,CDKN1A,MAP3K8,CDKN1B,MAP2K1,ITGA4
Caveolar-mediated Endocytosis Signaling	5.6	0.183	NaN	B2M,ITGB1,FYN,HLA-A,CD48,ABL1,FLOT1,ITGAL,ITGB7,FLOT2,ITGAV,ITGAX,ITGA4
Induction of Apoptosis by HIV1	5.55	0.197	1.732	NAIP,IKBKB,Naip1 (includes others),CXCR4,HTRA2,NFKB2,BAX,SLC25A5,NFKB1,TNFRSF1B,BCL2,TRAF1
LXR/RXR Activation	5.44	0.14	1.698	APOE,C3,CD36,APOC2,ABCG1,NFKB2,NFKB1,IL18RAP,IL1R2,IL36G,TF,IL1RN,S100A8,LBP,PLTP,TNFRSF1B,MMP9
Integrin Signaling	5.35	0.109	2.985	RAP1B,ITGB1,RAPGEF1,FYN,RAC2,RAF1,ARHGAP26,RRAS,ARPC5L,ABL1,GSN,ITGAL,RAP1A,ITGB7,CAPN1,RHOA,ITGAV,ZYX,CAPN2,VCL,MAP2K1,VASP,ITGAX,ITGA4
IL-6 Signaling	5.35	0.132	1.213	RAP1B,RAF1,SOCS3,RRAS,IL6R,MAPK13,NFKB2,NFKB1,RAP1A,IL18RAP,IL1R2,IKBKB,IL36G,JUN,IL1RN,LBP,TNFRSF1B,MAP2K1
PTEN Signaling	5.35	0.138	-2.183	RAP1B,ITGB1,RAC2,RAF1,TGFBR1,RRAS,NFKB2,NFKB1,RAP1A,BCL2,TGFBR2,IKBKB,INPP5F,CDKN1A,CDKN1B,MAP2K1,ITGA4
IL-17A Signaling in Fibroblasts	5.32	0.257	NaN	IKBKB,JUN,LCN2,CEBPD,NFKB2,MAPK13,IL17RA,NFKB1,NFKBIZ
Inflammasome pathway	5.24	0.35	2.646	NAIP,AIM2,PYCARD,CTSB,NFKB2,NFKB1,P2RX7
Chemokine Signaling	5.19	0.169	2.496	RAP1B,RAF1,Calm1 (includes others),PTK2B,RRAS,CXCR4,MAPK13,RAP1A,GNAI3,JUN,CAMK2D,RHOA,MAP2K1
Aryl Hydrocarbon Receptor Signaling	5.08	0.127	-1.291	MGST1,RBL2,TFDP1,BAX,NFKB2,NFKB1,NCOA3,TGM2,CTSD,JUN,MGST2,HSP90AB1,CCND3,RARA,CDKN1A,CDKN1B,NFE2L2,GSTP1
T Cell Receptor Signaling	5.01	0.137	NaN	RAP1B,RAF1,FYN,Calm1 (includes others),RRAS,CSK,MAP3K1,NFKB2,NFKB1,RAP1A,CD3D,PTPRC,IKBKB,JUN,RASGRP1,MAP2K1
FcÎ³ Receptor-mediated Phagocytosis in Macrophages and Monocytes	5	0.152	2.138	RAC2,FYN,PTK2B,ARPC5L,FYB1,FCGR1A,PLD4,NCF1,LYN,HCK,PRKCH,FGR,VASP,FCGR3A/FCGR3B
Toll-like Receptor Signaling	4.53	0.158	0.378	IKBKB,IL36G,JUN,IL1RN,MAP3K1,TLR7,RPS27A,NFKB2,MAPK13,LBP,NFKB1,TRAF1
Ceramide Signaling	4.52	0.139	2.138	RAP1B,RAF1,S1PR5,RRAS,MAP3K1,NFKB2,NFKB1,RAP1A,BCL2,S1PR4,CTSD,JUN,TNFRSF1B,MAP2K1
Inhibition of Angiogenesis by TSP1	4.48	0.235	2.121	TGFBR2,FYN,CD47,JUN,TGFBR1,CD36,MAPK13,MMP9
G-Protein Coupled Receptor Signaling	4.44	0.0919	NaN	RAP1B,RAF1,FYN,RGS18,PTK2B,NFKB1,IKBKB,LTB4R,CAMK2D,CXCR2,SMPDL3B,MAP2K1,ADRB2,SMPDL3A,GRK4,PDE2A,RRAS,NFKB2,RAP1A,FPR1,GNAI3,DUSP1,RASGRP1,MAP3K8,ADCY7,ADORA2A
Natural Killer Cell Signaling	4.43	0.123	NaN	RAP1B,RAF1,RAC2,FYN,PTPN6,LAIR1,RRAS,SH3BP2,RAP1A,CD300A,INPP5F,FCER1G,PRKCH,SH2D1B,MAP2K1,FCGR3A/FCGR3B
Prostate Cancer Signaling	4.43	0.136	NaN	RAP1B,RAF1,TFDP1,RRAS,ABL1,NFKB2,NFKB1,RAP1A,BCL2,HSP90AB1,CDKN1A,CDKN1B,MAP2K1,GSTP1
LPS/IL-1 Mediated Inhibition of RXR Function	4.31	0.0987	-1.732	APOE,MGST1,MAP3K1,APOC2,ABCG1,CHST12,ALAS1,SLC27A4,IL18RAP,IL1R2,IL36G,JUN,SCARB1,MGST2,IL1RN,RARA,CAT,FABP4,LBP,PLTP,TNFRSF1B,GSTP1
Phagosome Maturation	4.28	0.115	NaN	B2M,PRDX5,HLA-A,PRDX1,TUBA4A,CANX,PRDX6,CTSZ,CTSD,CTSA,TUBB6,TUBA8,CTSS,LAMP1,CTSB,CYBB,CTSC
CD28 Signaling in T Helper Cells	4.27	0.119	2.309	FYN,PTPN6,Calm1 (includes others),HLA-A,ARPC5L,CSK,MAP3K1,NFKB2,NFKB1,CD3D,PTPRC,IKBKB,JUN,HLA-DMA,FCER1G,MAP2K1
NF-ÎºB Activation by Viruses	4.19	0.137	3.606	ITGB1,RAP1B,RAF1,IKBKB,RRAS,MAP3K1,ITGAV,PRKCH,NFKB2,NFKB1,ITGAL,RAP1A,ITGA4
Phospholipase C Signaling	4.17	0.0943	3.9	RAP1B,ITGB1,FYN,RAF1,Calm1 (includes others),RRAS,MEF2A,ARHGEF1,NFKB2,NFKB1,CD3D,RAP1A,PLD4,TGM2,RHOA,FCER1G,LYN,MEF2C,PRKCH,ARHGEF3,ADCY7,MAP2K1,ITGA4
Opioid Signaling Pathway	4.12	0.0935	2.4	RAP1B,RGS1,FYN,RAC2,RAF1,GRK4,Calm1 (includes others),RGS18,RRAS,NFKB2,NFKB1,RAP1A,GRINA,GNAI3,ARRB2,CAMK2D,HCK,LYN,PRKCH,CDKN1B,ADCY7,MAP2K1,FGR
Rac Signaling	4.1	0.121	3.873	ITGB1,RAP1B,RAF1,PTK2B,RRAS,ARPC5L,MAP3K1,NFKB2,NFKB1,RAP1A,JUN,RHOA,CYBB,MAP2K1,ITGA4
14-3-3-mediated Signaling	4.07	0.115	2.111	RAP1B,RAF1,YWHAG,RRAS,YWHAZ,TUBA4A,VIM,BAX,RAP1A,SRPK2,JUN,TUBB6,TUBA8,PRKCH,CDKN1B,MAP2K1
Type I Diabetes Mellitus Signaling	4.06	0.126	0.632	SOCS3,ICA1,HLA-A,IFNGR1,MAPK13,NFKB2,NFKB1,CD3D,BCL2,IKBKB,HLA-DMA,FCER1G,TNFRSF1B,HLA-E
April Mediated Signaling	4.02	0.205	2.121	IKBKB,JUN,MAP3K1,TNFRSF13B,MAPK13,NFKB2,NFKB1,TRAF1
autophagy	4.01	0.164	NaN	CTSZ,CTSD,CTSA,ATG9A,CTSS,WIPI1,LAMP1,CTSB,CTSC,BCL2
PPARÎ±/RXRÎ± Activation	4.01	0.102	-2.065	RAP1B,RAF1,TGFBR1,RRAS,CD36,NFKB2,NFKB1,RAP1A,NCOA3,IL18RAP,TGFBR2,IL1R2,IKBKB,JUN,HSP90AB1,MEF2C,STAT5B,ADCY7,MAP2K1
Apelin Endothelial Signaling Pathway	3.98	0.118	2.324	RAP1B,RAF1,VCAM1,Calm1 (includes others),RRAS,MEF2A,NFKB2,NFKB1,RAP1A,GNAI3,JUN,MEF2C,PRKCH,MAP2K1,ADCY7
GÎ±12/13 Signaling	3.92	0.112	4	RAP1B,RAF1,PTK2B,RRAS,MAP3K1,MEF2A,ARHGEF1,NFKB2,NFKB1,RAP1A,IKBKB,LPAR6,JUN,RHOA,MEF2C,MAP2K1
TREM1 Signaling	3.9	0.147	2.714	ITGB1,CXCL3,Naip1 (includes others),LAT2,TLR7,Tlr13,CD83,NFKB2,NFKB1,STAT5B,ITGAX
Erythropoietin Signaling	3.89	0.136	NaN	RAP1B,SOCS3,RAF1,PTPN6,JUN,RRAS,PRKCH,NFKB2,NFKB1,STAT5B,MAP2K1,RAP1A
Renin-Angiotensin Signaling	3.87	0.115	3.207	RAP1B,RAF1,PTPN6,PTK2B,RRAS,MAP3K1,MAPK13,NFKB2,NFKB1,RAP1A,JUN,PRKCH,ADCY7,MAP2K1,ACE
B Cell Activating Factor Signaling	3.86	0.195	2.121	IKBKB,JUN,MAP3K1,TNFRSF13B,MAPK13,NFKB2,NFKB1,TRAF1
Adrenomedullin signaling pathway	3.85	0.0966	2.236	RAP1B,PPARG,RAF1,Calm1 (includes others),C3,PTK2B,RRAS,CSK,BAX,MAPK13,NFKB2,NFKB1,RAP1A,BCL2,IL36G,MAX,IL1RN,CFH,ADCY7,MAP2K1
Agranulocyte Adhesion and Diapedesis	3.82	0.099	NaN	ITGB1,VCAM1,SELL,C5AR1,CXCR4,MMP25,ITGB7,Ccl9,CXCL3,GNAI3,IL36G,CLDN1,IL1RN,CXCR2,MMP8,PECAM1,MMP9,MSN,ITGA4
Ephrin Receptor Signaling	3.8	0.102	2.357	RAP1B,ITGB1,RAPGEF1,FYN,RAC2,RAF1,RRAS,CXCR4,ARPC5L,ABL1,RAP1A,GRINA,GNAI3,ABI1,RHOA,DOK1,MAP2K1,ITGA4
4-1BB Signaling in T Lymphocytes	3.77	0.219	1.89	IKBKB,JUN,NFKB2,MAPK13,NFKB1,MAP2K1,TRAF1
JAK/Stat Signaling	3.75	0.132	1.732	RAP1B,SOCS3,RAF1,PTPN6,JUN,RRAS,CDKN1A,NFKB2,NFKB1,STAT5B,MAP2K1,RAP1A
VDR/RXR Activation	3.75	0.141	-1.633	SERPINB1,CAMP,GADD45A,CDKN1A,MXD1,PRKCH,CDKN1B,HES1,THBD,KLF4,NCOA3
Osteoarthritis Pathway	3.74	0.0948	0.728	ITGB1,PPARG,TGFBR1,ITLN1,HES1,NFKB2,NFKB1,IL18RAP,TGFBR2,IL1R2,S100A9,CXCR2,S100A8,MEF2C,TNFRSF1B,MMP9,P2RX7,LRP1,TCF7L2,ITGA4
Neuroinflammation Signaling Pathway	3.73	0.0831	3.4	B2M,Naip1 (includes others),TGFBR1,HLA-A,PYCARD,MAPK13,CX3CR1,NFKB1,BCL2,GRINA,TGFBR2,IKBKB,JUN,HLA-DMA,CYBB,TLR7,NFE2L2,NAIP,VCAM1,IL6R,IFNGR1,NFKB2,CSF1R,Tlr13,P2RX7,MMP9
Breast Cancer Regulation by Stathmin1	3.71	0.0943	NaN	RAP1B,RAF1,Calm1 (includes others),RRAS,TUBA4A,ARHGEF1,RAP1A,STMN1,GNAI3,CAMK2D,TUBB6,TUBA8,RHOA,CDKN1A,PRKCH,ARHGEF3,CDKN1B,ADCY7,MAP2K1,E2F2
Cell Cycle: G1/S Checkpoint Regulation	3.66	0.149	2.828	RPL11,RBL2,MAX,CCND3,TFDP1,CDKN1A,ABL1,FBXL5,CDKN1B,E2F2
Neuregulin Signaling	3.66	0.129	2.333	RPS6,ITGB1,RAP1B,RAF1,HSP90AB1,RRAS,PRKCH,CDKN1B,STAT5B,MAP2K1,RAP1A,ITGA4
HGF Signaling	3.66	0.116	3.051	ITGB1,RAP1B,RAPGEF1,RAF1,RRAS,MAP3K1,RAP1A,ELF1,JUN,CDKN1A,MAP3K8,PRKCH,MAP2K1,ITGA4
TGF-Î² Signaling	3.66	0.129	1.897	TGFBR2,RAP1B,ZFYVE9,RAF1,JUN,TGFBR1,RRAS,MAPK13,MAP2K1,RAP1A,INHBA,BCL2
Cholecystokinin/Gastrin-mediated Signaling	3.65	0.121	2.496	RAP1B,RAF1,PTK2B,RRAS,MEF2A,RAP1A,IL36G,JUN,IL1RN,RHOA,PRKCH,MEF2C,MAP2K1
FAK Signaling	3.65	0.121	NaN	ITGB1,RAP1B,RAF1,FYN,ARHGAP26,RRAS,CAPN1,CSK,CAPN2,VCL,MAP2K1,RAP1A,ITGA4
Glutathione Redox Reactions I	3.64	0.25	-0.816	GSR,MGST1,MGST2,GPX1,PRDX6,GSTP1
Pancreatic Adenocarcinoma Signaling	3.62	0.115	2.121	RAF1,TGFBR1,TFDP1,ABL1,NFKB2,NFKB1,BCL2,TGFBR2,PLD4,CDKN1A,CDKN1B,MAP2K1,MMP9,E2F2
LPS-stimulated MAPK Signaling	3.57	0.126	2.111	RAP1B,RAF1,IKBKB,JUN,RRAS,PRKCH,NFKB2,MAPK13,LBP,NFKB1,MAP2K1,RAP1A
PEDF Signaling	3.57	0.126	1.732	RAP1B,PPARG,RAF1,IKBKB,RRAS,RHOA,NFKB2,MAPK13,NFKB1,RAP1A,TCF7L2,BCL2
iNOS Signaling	3.57	0.178	1.633	IKBKB,Calm1 (includes others),JUN,IFNGR1,MAPK13,NFKB2,LBP,NFKB1
NRF2-mediated Oxidative Stress Response	3.54	0.0941	2.5	RAP1B,RAF1,MGST1,RRAS,PRDX1,MAP3K1,RAP1A,MAFG,GSR,FTL,JUN,SCARB1,MGST2,CAT,PRKCH,TXN,MAP2K1,NFE2L2,GSTP1
GNRH Signaling	3.54	0.1	2	RAP1B,RAF1,Calm1 (includes others),PTK2B,RRAS,MAP3K1,MAPK13,NFKB2,NFKB1,RAP1A,GNAI3,JUN,CAMK2D,MAP3K8,PRKCH,ADCY7,MAP2K1
Hepatic Fibrosis / Hepatic Stellate Cell Activation	3.53	0.0968	NaN	IGFBP4,VCAM1,TGFBR1,IL6R,IFNGR1,BAX,NFKB2,NFKB1,IL18RAP,BCL2,TGFBR2,IL1R2,CXCL3,IL10RA,EDNRA,LBP,TNFRSF1B,MMP9
NF-ÎºB Signaling	3.51	0.0963	2.828	RAP1B,RAF1,TGFBR1,RRAS,UBE2N,MAP3K1,NFKB2,NFKB1,RAP1A,TGFBR2,IL1R2,IKBKB,IL36G,IL1RN,TLR7,FCER1G,MAP3K8,TNFRSF1B
FAT10 Cancer Signaling Pathway	3.5	0.174	2.828	TGFBR2,EEF1A1,IKBKB,TGFBR1,CXCR4,NFKB2,TNFRSF1B,NFKB1
Atherosclerosis Signaling	3.41	0.109	NaN	APOE,IL36G,VCAM1,IL1RN,CXCR4,CD36,S100A8,APOC2,NFKB2,ALOX5,NFKB1,PLA2G7,MMP9,ITGA4
fMLP Signaling in Neutrophils	3.37	0.109	2.496	RAP1B,RAF1,Calm1 (includes others),RRAS,ARPC5L,NFKB2,NFKB1,RAP1A,FPR1,GNAI3,NCF1,CYBB,PRKCH,MAP2K1
T Helper Cell Differentiation	3.35	0.137	NaN	TGFBR2,TGFBR1,HLA-A,HLA-DMA,IL6R,FCER1G,IL10RA,IFNGR1,BCL6,TNFRSF1B
UVC-Induced MAPK Signaling	3.31	0.163	2.121	RAP1B,RAF1,JUN,RRAS,PRKCH,MAPK13,MAP2K1,RAP1A
Antigen Presentation Pathway	3.28	0.184	NaN	B2M,HLA-DMA,HLA-A,CANX,CD74,TAPBP,HLA-E
Role of Tissue Factor in Cancer	3.27	0.106	NaN	RAP1B,ITGB1,FYN,ARRB2,PTK2B,RRAS,ITGAV,HCK,LYN,PLAUR,MAPK13,STAT5B,RAP1A,FGR
IL-12 Signaling and Production in Macrophages	3.25	0.101	NaN	PPARG,APOE,IFNGR1,APOC2,MAPK13,NFKB2,NFKB1,IKBKB,JUN,PRKCH,S100A8,MAP3K8,IRF8,REL,MAP2K1
Germ Cell-Sertoli Cell Junction Signaling	3.25	0.0944	NaN	RAP1B,ITGB1,RAC2,TGFBR1,RRAS,MAP3K1,TUBA4A,GSN,RAP1A,TGFBR2,TUBB6,TUBA8,RHOA,ZYX,MAP3K8,VCL,MAP2K1
TNFR1 Signaling	3.24	0.16	1.414	NAIP,IKBKB,Naip1 (includes others),MADD,JUN,MAP3K1,NFKB2,NFKB1
Virus Entry via Endocytic Pathways	3.23	0.11	NaN	RAP1B,ITGB1,B2M,FYN,RAC2,HLA-A,RRAS,ABL1,PRKCH,RAP1A,ITGAL,ITGB7,ITGA4
Epithelial Adherens Junction Signaling	3.22	0.101	NaN	TGFBR2,RAP1B,RAPGEF1,NOTCH2,TGFBR1,TUBB6,TUBA8,ARPC5L,RRAS,RHOA,TUBA4A,ZYX,VCL,RAP1A,TCF7L2
RANK Signaling in Osteoclasts	3.21	0.115	2.309	RAF1,IKBKB,JUN,Calm1 (includes others),PTK2B,MAP3K1,MAP3K8,NFKB2,MAPK13,NFKB1,GSN,MAP2K1
Regulation of Cellular Mechanics by Calpain Protease	3.21	0.143	2.121	ITGB1,RAP1B,RRAS,CAPN1,CAPN2,VCL,CDKN1B,RAP1A,ITGA4
T Cell Exhaustion Signaling Pathway	3.19	0.0934	2.111	RAP1B,PTPN6,TGFBR1,RRAS,HLA-A,HAVCR2,IL6R,BCL6,RAP1A,TGFBR2,PDCD1LG2,JUN,HLA-DMA,FCER1G,IL10RA,CD274,HLA-E
PKCÎ¸ Signaling in T Lymphocytes	3.16	0.0958	3	RAP1B,RAC2,FYN,RRAS,HLA-A,MAP3K1,NFKB2,NFKB1,CD3D,RAP1A,IKBKB,CAMK2D,JUN,HLA-DMA,FCER1G,MAP3K8
Oncostatin M Signaling	3.14	0.175	1.89	RAP1B,RAF1,RRAS,OSM,STAT5B,RAP1A,MAP2K1
Role of Osteoblasts, Osteoclasts and Chondrocytes in Rheumatoid Arthritis	3.13	0.0851	NaN	ITGB1,NAIP,Naip1 (includes others),Calm1 (includes others),PTK2B,CSNK1A1,GSN,NFKB1,CSF1R,IL18RAP,BCL2,IL1R2,IKBKB,IL36G,JUN,IL1RN,MMP8,TNFRSF1B,LRP1,TCF7L2
Paxillin Signaling	3.13	0.107	1	RAP1B,ITGB1,PTK2B,RRAS,CSK,MAPK13,RAP1A,ITGAL,ITGB7,ITGAV,VCL,ITGAX,ITGA4
Glioma Signaling	3.1	0.107	2.828	RAP1B,RAF1,RBL2,CAMK2D,Calm1 (includes others),TFDP1,RRAS,CDKN1A,ABL1,PRKCH,MAP2K1,RAP1A,E2F2
Colorectal Cancer Metastasis Signaling	3.08	0.0824	2.357	RAP1B,TGFBR1,RRAS,IL6R,IFNGR1,BAX,NFKB2,NFKB1,MMP25,RAP1A,TGFBR2,JUN,RHOA,MMP8,TLR7,Tlr13,ADCY7,MAP2K1,MMP9,LRP1,TCF7L2
Th1 and Th2 Activation Pathway	3.06	0.0909	NaN	CCR1,SOCS3,TGFBR1,HLA-A,CXCR4,HAVCR2,IL6R,IFNGR1,NFKB1,CD3D,TGFBR2,NOTCH2,JUN,HLA-DMA,IL10RA,CD274,STAT5B
Calcium-induced T Lymphocyte Apoptosis	3.06	0.136	1.414	Calm1 (includes others),HLA-A,HLA-DMA,NR4A1,FCER1G,ATP2A3,PRKCH,CAPN2,CD3D
Bladder Cancer Signaling	3.04	0.117	2.236	RAP1B,RAF1,TFDP1,RRAS,MMP8,CDKN1A,ABL1,MMP25,MAP2K1,RAP1A,MMP9
Apelin Adipocyte Signaling Pathway	3.03	0.125	-1.265	GNAI3,MGST1,MGST2,CAT,GPX1,CYBB,MAPK13,ADCY7,PRDX6,GSTP1
GM-CSF Signaling	2.99	0.123	3.162	RAP1B,RAF1,CAMK2D,RRAS,HCK,LYN,BCL2A1,STAT5B,MAP2K1,RAP1A
Communication between Innate and Adaptive Immune Cells	2.96	0.115	NaN	B2M,IL36G,HLA-A,IL1RN,TLR7,FCER1G,Tlr13,CD83,TNFRSF13B,HLA-E,Ccl9
Role of IL-17A in Psoriasis	2.94	0.308	NaN	CXCL3,S100A9,S100A8,IL17RA
cAMP-mediated signaling	2.92	0.0837	1.213	SMPDL3A,RAF1,GRK4,PDE2A,Calm1 (includes others),RGS18,AKAP8,RAP1A,FPR1,GNAI3,LTB4R,CAMK2D,DUSP1,CXCR2,SMPDL3B,ADORA2A,ADCY7,MAP2K1,ADRB2
ERK5 Signaling	2.92	0.13	3	RAP1B,YWHAG,SGK1,RRAS,YWHAZ,MEF2A,MAP3K8,MEF2C,RAP1A
Hepatic Cholestasis	2.9	0.0938	NaN	CYP27A1,NFKB2,NFKB1,IL18RAP,IL1R2,IKBKB,IL36G,JUN,IL1RN,RARA,OSM,PRKCH,LBP,TNFRSF1B,ADCY7
Endocannabinoid Developing Neuron Pathway	2.9	0.102	0.277	RAP1B,RAC2,RAF1,RRAS,MAPK13,MLST8,RAP1A,GNAI3,RHOA,MGLL,CDKN1B,ADCY7,MAP2K1
D-myo-inositol (1,4,5,6)-Tetrakisphosphate Biosynthesis	2.9	0.0972	3.207	SOCS3,PTPN6,DUSP2,PTPRC,ATP1A1,DUSP5,INPP5F,PTPRJ,PTPRO,DUSP1,PPM1H,NUDT4,SIRPA,DUSP16
D-myo-inositol (3,4,5,6)-tetrakisphosphate Biosynthesis	2.9	0.0972	3.207	SOCS3,PTPN6,DUSP2,PTPRC,ATP1A1,DUSP5,INPP5F,PTPRJ,PTPRO,DUSP1,PPM1H,NUDT4,SIRPA,DUSP16
IL-15 Signaling	2.87	0.119	NaN	RAP1B,RAF1,VCAM1,RRAS,NFKB2,MAPK13,NFKB1,STAT5B,MAP2K1,RAP1A
Acute Myeloid Leukemia Signaling	2.85	0.111	2.53	RAP1B,RAF1,RRAS,RARA,NFKB2,NFKB1,STAT5B,MAP2K1,RAP1A,CSF1R,TCF7L2
D-myo-inositol-5-phosphate Metabolism	2.85	0.0926	3.357	SOCS3,PTPN6,DUSP2,PTPRC,PLD4,ATP1A1,DUSP5,INPP5F,PTPRJ,PTPRO,DUSP1,PPM1H,NUDT4,SIRPA,DUSP16
Axonal Guidance Signaling	2.78	0.0663	NaN	DPYSL2,RAP1B,RAC2,FYN,RAF1,ABL1,MMP25,ADAM8,TUBA8,MMP8,ADAM19,PLXNB2,RASSF5,SEMA4A,PLXNB3,MAP2K1,VASP,ACE,ITGA4,ITGB1,RRAS,CXCR4,ARPC5L,TUBA4A,L1CAM,RAP1A,GNAI3,ADAMDEC1,SEMA4D,TUBB6,RHOA,PRKCH,MMP9
Signaling by Rho Family GTPases	2.76	0.0794	2.982	ITGB1,RAF1,SEPT5,SEPT9,PTK2B,ARPC5L,VIM,ARHGEF1,NFKB2,NFKB1,SEPT1,STMN1,GNAI3,JUN,RHOA,CYBB,ARHGEF3,MAP2K1,MSN,ITGA4
Sertoli Cell-Sertoli Cell Junction Signaling	2.74	0.0874	NaN	RAP1B,ITGB1,RAF1,RRAS,MAP3K1,TUBA4A,MAPK13,RAP1A,JUN,TUBA8,TUBB6,CLDN1,MAP3K8,VCL,MAP2K1,ITGA4
Role of JAK1, JAK2 and TYK2 in Interferon Signaling	2.73	0.208	NaN	RAF1,PTPN6,IFNGR1,NFKB2,NFKB1
p38 MAPK Signaling	2.73	0.102	-0.577	TGFBR2,IL1R2,IL36G,TGFBR1,MAX,IL1RN,DUSP1,MEF2A,MEF2C,MAPK13,TNFRSF1B,IL18RAP
Systemic Lupus Erythematosus Signaling	2.72	0.0805	NaN	RAP1B,PTPN6,SNRPB,RRAS,HLA-A,IL6R,CD3D,RAP1A,FCGR1A,PTPRC,IL36G,JUN,IL1RN,CD72,TLR7,FCER1G,LYN,HLA-E,FCGR3A/FCGR3B
TWEAK Signaling	2.72	0.171	0	NAIP,IKBKB,Naip1 (includes others),NFKB2,NFKB1,TRAF1
Role of JAK family kinases in IL-6-type Cytokine Signaling	2.65	0.2	NaN	SOCS3,IL6R,OSM,MAPK13,STAT5B
IL-3 Signaling	2.64	0.111	2.53	RAP1B,RAF1,RAPGEF1,PTPN6,JUN,RRAS,PRKCH,STAT5B,MAP2K1,RAP1A
Altered T Cell and B Cell Signaling in Rheumatoid Arthritis	2.64	0.111	NaN	IL36G,HLA-A,IL1RN,HLA-DMA,TLR7,FCER1G,Tlr13,TNFRSF13B,NFKB2,NFKB1
OX40 Signaling Pathway	2.64	0.111	1.633	B2M,JUN,HLA-A,HLA-DMA,FCER1G,NFKB2,NFKB1,CD3D,HLA-E,BCL2
ERK/MAPK Signaling	2.63	0.0829	2.138	RAP1B,ITGB1,PPARG,RAPGEF1,FYN,RAC2,RAF1,YWHAG,PTK2B,RRAS,YWHAZ,RAP1A,DUSP2,ELF1,DUSP1,MAP2K1,ITGA4
Actin Nucleation by ARP-WASP Complex	2.62	0.129	2.121	RAP1B,ITGB1,ARPC5L,RRAS,RHOA,RAP1A,VASP,ITGA4
Prolactin Signaling	2.61	0.11	2.53	RAP1B,FYN,SOCS3,RAF1,JUN,RRAS,PRKCH,STAT5B,MAP2K1,RAP1A
Cardiac Hypertrophy Signaling	2.6	0.0785	3.9	RAP1B,RAF1,TGFBR1,Calm1 (includes others),RRAS,MAP3K1,IL6R,MEF2A,MAPK13,RAP1A,TGFBR2,GNAI3,JUN,RHOA,MEF2C,MAP3K8,ADCY7,MAP2K1,ADRB2
Î±-Adrenergic Signaling	2.57	0.109	1.667	RAP1B,RAF1,GNAI3,Calm1 (includes others),RRAS,PYGL,PRKCH,ADCY7,MAP2K1,RAP1A
Airway Pathology in Chronic Obstructive Pulmonary Disease	2.57	0.375	NaN	CXCL3,MMP8,MMP9
Glycolysis I	2.57	0.192	-1.342	GPI,ENO3,PGAM1,PKM,GAPDH
Gluconeogenesis I	2.57	0.192	-1.342	GPI,ENO3,PGAM1,GAPDH,MDH2
Role of NFAT in Cardiac Hypertrophy	2.56	0.0796	3.153	RAP1B,RAF1,TGFBR1,Calm1 (includes others),RRAS,MAP3K1,MEF2A,CSNK1A1,MAPK13,RAP1A,TGFBR2,RCAN1,GNAI3,CAMK2D,MEF2C,PRKCH,ADCY7,MAP2K1
IL-7 Signaling Pathway	2.54	0.108	-0.333	FYN,JUN,CCND3,LYN,CDKN1B,MAPK13,BAX,BCL6,STAT5B,BCL2
HMGB1 Signaling	2.53	0.0922	1.941	RAP1B,VCAM1,RRAS,IFNGR1,MAPK13,NFKB2,NFKB1,RAP1A,JUN,RHOA,OSM,TNFRSF1B,MAP2K1
3-phosphoinositide Degradation	2.52	0.0886	3.207	SOCS3,PTPN6,DUSP2,PTPRC,ATP1A1,DUSP5,INPP5F,PTPRJ,PTPRO,DUSP1,PPM1H,NUDT4,SIRPA,DUSP16
Endocannabinoid Cancer Inhibition Pathway	2.52	0.0886	1.604	RAF1,ATF3,VIM,MLST8,GNAI3,CCND3,RHOA,CDKN1A,NUPR1,CDKN1B,ADCY7,MAP2K1,TCF7L2,CAMKK2
NGF Signaling	2.52	0.096	3.464	RAP1B,RAF1,IKBKB,RRAS,RHOA,MAP3K1,MAP3K8,NFKB2,BAX,NFKB1,MAP2K1,RAP1A
Role of MAPK Signaling in the Pathogenesis of Influenza	2.5	0.114	NaN	RAP1B,RAF1,RRAS,MAPK13,BAX,PLA2G7,MAP2K1,RAP1A,BCL2
Reelin Signaling in Neurons	2.5	0.106	NaN	ITGB1,FYN,APOE,HCK,LYN,ARHGEF1,ARHGEF3,ITGAL,FGR,ITGA4
Pyridoxal 5'-phosphate Salvage Pathway	2.49	0.123	2.121	GRK4,PRKX,SGK1,CSNK1A1,PRKCH,MAP3K8,ADPGK,MAP2K1
Corticotropin Releasing Hormone Signaling	2.47	0.0909	2.111	RAP1B,RAF1,Calm1 (includes others),MEF2A,MAPK13,RAP1A,GNAI3,JUN,NR4A1,MEF2C,PRKCH,MAP2K1,ADCY7
Fc Epsilon RI Signaling	2.46	0.0945	1.732	RAP1B,FYN,RAF1,RAC2,INPP5F,RRAS,FCER1G,LYN,PRKCH,MAPK13,MAP2K1,RAP1A
Actin Cytoskeleton Signaling	2.46	0.0779	2.183	RAP1B,ITGB1,RAC2,RAF1,RRAS,ARPC5L,CSK,ARHGEF1,GSN,SSH1,RAP1A,RHOA,VCL,LBP,SSH2,MAP2K1,MSN,ITGA4
Dendritic Cell Maturation	2.44	0.0816	2.309	B2M,HLA-A,CD83,MAPK13,NFKB2,NFKB1,FCGR1A,IKBKB,IL36G,HLA-DMA,IL1RN,FCER1G,LY75,IRF8,TNFRSF1B,FCGR3A/FCGR3B
CD27 Signaling in Lymphocytes	2.41	0.132	2.449	IKBKB,JUN,MAP3K1,MAP3K8,NFKB2,NFKB1,MAP2K1
Salvage Pathways of Pyrimidine Ribonucleotides	2.4	0.103	2.53	GRK4,PRKX,APOBEC1,SGK1,CSNK1A1,MAP3K8,PRKCH,CMPK1,ADPGK,MAP2K1
BMP signaling pathway	2.39	0.11	2.333	RAP1B,RAF1,JUN,RRAS,NFKB2,MAPK13,NFKB1,MAP2K1,RAP1A
GDNF Family Ligand-Receptor Interactions	2.32	0.107	2.121	RAP1B,RAF1,JUN,PDLIM7,DOK2,RRAS,DOK1,MAP2K1,RAP1A
3-phosphoinositide Biosynthesis	2.31	0.0792	3.5	SOCS3,FYN,PTPN6,DUSP2,PTPRC,ATP1A1,DUSP5,INPP5F,PTPRJ,PTPRO,DUSP1,PPM1H,PIK3AP1,NUDT4,SIRPA,DUSP16
Xenobiotic Metabolism Signaling	2.25	0.0702	NaN	RAP1B,RAF1,MGST1,RRAS,MAP3K1,CHST12,MAPK13,NFKB2,NFKB1,RAP1A,FTL,CAMK2D,MGST2,HSP90AB1,CAT,MAP3K8,PRKCH,MAP2K1,NFE2L2,CITED2,GSTP1
Small Cell Lung Cancer Signaling	2.22	0.103	1.633	IKBKB,MAX,TFDP1,ABL1,NFKB2,CDKN1B,NFKB1,BCL2,TRAF1
Thrombopoietin Signaling	2.22	0.111	2.828	RAP1B,RAF1,JUN,RRAS,PRKCH,STAT5B,MAP2K1,RAP1A
IL-2 Signaling	2.22	0.111	2.646	RAP1B,RAF1,JUN,PTK2B,RRAS,STAT5B,MAP2K1,RAP1A
Tec Kinase Signaling	2.21	0.0819	3.606	ITGB1,GNAI3,FYN,PTK2B,RHOA,FCER1G,HCK,LYN,PRKCH,NFKB2,STAT5B,NFKB1,FGR,ITGA4
RAR Activation	2.19	0.0789	NaN	CSK,MAP3K1,MAPK13,NFKB2,NFKB1,JUN,DHRS9,DUSP1,RARA,PRKCH,STAT5B,REL,MAP2K1,ADCY7,CITED2
Cytotoxic T Lymphocyte-mediated Apoptosis of Target Cells	2.16	0.156	NaN	B2M,HLA-A,FCER1G,CD3D,BCL2
CDK5 Signaling	2.16	0.0952	2.333	ITGB1,RAP1B,RAF1,RRAS,CAPN1,ABL1,MAPK13,ADCY7,MAP2K1,RAP1A
Crosstalk between Dendritic Cells and Natural Killer Cells	2.16	0.101	NaN	CAMK2D,HLA-A,TLR7,CD83,NFKB2,NFKB1,TNFRSF1B,ITGAL,HLA-E
Macropinocytosis Signaling	2.16	0.101	2.449	ITGB1,RAP1B,ABI1,RRAS,RHOA,PRKCH,RAP1A,CSF1R,ITGB7
Nur77 Signaling in T Lymphocytes	2.15	0.119	NaN	Calm1 (includes others),HLA-DMA,HLA-A,NR4A1,FCER1G,CD3D,BCL2
Thrombin Signaling	2.14	0.0758	2.5	RAP1B,RAF1,RRAS,ARHGEF1,MAPK13,NFKB2,NFKB1,RAP1A,IKBKB,GNAI3,CAMK2D,RHOA,PRKCH,ARHGEF3,MAP2K1,ADCY7
p70S6K Signaling	2.12	0.0857	2.53	RPS6,RAP1B,RAF1,GNAI3,YWHAG,EEF2,RRAS,YWHAZ,LYN,PRKCH,MAP2K1,RAP1A
P2Y Purigenic Receptor Signaling Pathway	2.12	0.0857	3.464	RAP1B,RAF1,GNAI3,JUN,RRAS,P2RY6,PRKCH,NFKB2,NFKB1,ADCY7,MAP2K1,RAP1A
Agrin Interactions at Neuromuscular Junction	2.11	0.107	2.121	RAP1B,ITGB1,RAC2,JUN,RRAS,RAP1A,ITGAL,ITGA4
Thyroid Cancer Signaling	2.11	0.13	NaN	RAP1B,PPARG,RRAS,MAP2K1,RAP1A,TCF7L2
Glutathione Redox Reactions II	2.08	0.5	NaN	GSR,GLRX
iCOS-iCOSL Signaling in T Helper Cells	2.07	0.088	2.121	PTPRC,IKBKB,Calm1 (includes others),CAMK2D,HLA-A,HLA-DMA,CSK,FCER1G,NFKB2,NFKB1,CD3D
Antioxidant Action of Vitamin C	2.05	0.0917	-1.89	PLD4,IKBKB,NFKB2,TXN,MAPK13,NFKB1,STAT5B,GLRX,PLA2G7,SLC2A3
Polyamine Regulation in Colon Cancer	2.05	0.182	NaN	PPARG,MAX,MXD1,SAT1
FXR/RXR Activation	2.05	0.0873	NaN	PPARG,APOE,IL36G,C3,TF,SCARB1,CYP27A1,IL1RN,RARA,APOC2,PLTP
ErbB2-ErbB3 Signaling	2.04	0.104	2.449	RAP1B,RAF1,JUN,RRAS,CDKN1B,STAT5B,MAP2K1,RAP1A
Death Receptor Signaling	2.04	0.0968	0.333	NAIP,IKBKB,Naip1 (includes others),HTRA2,NFKB2,NFKB1,TNFRSF1B,ARHGDIB,BCL2
Graft-versus-Host Disease Signaling	2.02	0.125	NaN	IL36G,HLA-A,IL1RN,HLA-DMA,FCER1G,HLA-E
Superpathway of Inositol Phosphate Compounds	2.01	0.0717	3.638	FYN,SOCS3,PTPN6,DUSP2,PTPRC,PLD4,DUSP5,ATP1A1,PTPRJ,INPP5F,DUSP1,PTPRO,PPM1H,PIK3AP1,NUDT4,SIRPA,DUSP16
VEGF Signaling	2	0.0901	2.333	RAP1B,RAF1,PTPN6,PTK2B,RRAS,VCL,MAP2K1,RAP1A,EIF2S2,BCL2
Cell Cycle: G2/M DNA Damage Checkpoint Regulation	1.97	0.122	1.342	YWHAG,GADD45A,CDKN1A,ABL1,YWHAZ,FBXL5
Interferon Signaling	1.94	0.139	1.342	IFITM3,IFNGR1,BAX,IFITM2,BCL2
IGF-1 Signaling	1.94	0.0885	1.89	RAP1B,IGFBP4,SOCS3,RAF1,JUN,YWHAG,RRAS,YWHAZ,MAP2K1,RAP1A
Leukotriene Biosynthesis	1.92	0.231	NaN	LTA4H,MGST2,ALOX5
CD40 Signaling	1.92	0.0988	1.89	IKBKB,JUN,PTGS1,MAPK13,NFKB2,NFKB1,MAP2K1,TRAF1
Cyclins and Cell Cycle Regulation	1.92	0.0988	-2.236	RAF1,CCND3,TFDP1,CDKN1A,ABL1,FBXL5,CDKN1B,E2F2
Phagosome Formation	1.9	0.0833	NaN	ITGB1,C5AR1,RHOA,TLR7,FCER1G,Tlr13,PRKCH,FCGR1A,FCGR3A/FCGR3B,ITGAX,ITGA4
PDGF Signaling	1.9	0.0918	3	RAP1B,RAF1,JUN,INPP5F,RRAS,MAP3K1,ABL1,MAP2K1,RAP1A
Ovarian Cancer Signaling	1.88	0.0795	1.134	RAP1B,RAF1,TFDP1,RRAS,PTGS1,ABL1,EDNRA,MAP2K1,RAP1A,MMP9,TCF7L2,BCL2
Th2 Pathway	1.86	0.0789	0.333	TGFBR2,CCR1,SOCS3,NOTCH2,JUN,TGFBR1,CXCR4,HLA-A,HLA-DMA,NFKB1,STAT5B,CD3D
IL-17A Signaling in Gastric Cells	1.85	0.16	NaN	JUN,MAPK13,NFKB1,IL17RA
CXCR4 Signaling	1.82	0.0756	2.309	RAP1B,RAF1,RRAS,CXCR4,RAP1A,GNAI3,JUN,RHOA,LYN,PRKCH,ELMO2,ADCY7,MAP2K1
Non-Small Cell Lung Cancer Signaling	1.8	0.0941	2.236	RAP1B,RAF1,TFDP1,RRAS,ABL1,RASSF5,RAP1A,MAP2K1
Th1 Pathway	1.79	0.0803	1.667	SOCS3,NOTCH2,HLA-A,HLA-DMA,HAVCR2,IL6R,IL10RA,IFNGR1,CD274,NFKB1,CD3D
Iron homeostasis signaling pathway	1.79	0.0803	NaN	FTL,HP,TF,IL6R,SLC11A2,SLC40A1,FBXL5,STAT5B,LRP1,SLC11A1,HFE
Lipid Antigen Presentation by CD1	1.79	0.154	NaN	B2M,FCER1G,PSAP,CANX
Estrogen-mediated S-phase Entry	1.79	0.154	NaN	TFDP1,CDKN1A,CDKN1B,E2F2
Angiopoietin Signaling	1.77	0.093	1.414	RAP1B,IKBKB,DOK2,RRAS,NFKB2,STAT5B,NFKB1,RAP1A
Cancer Drug Resistance By Drug Efflux	1.74	0.109	NaN	RAP1B,RAF1,RRAS,NFKB1,MAP2K1,RAP1A
Regulation of the Epithelial-Mesenchymal Transition Pathway	1.71	0.0711	NaN	RAP1B,RAF1,TGFBR1,RRAS,NFKB2,NFKB1,RAP1A,TGFBR2,NOTCH2,RHOA,ZEB2,MAP2K1,MMP9,TCF7L2
Ceramide Degradation	1.7	0.333	NaN	ACER3,ASAH1
Extrinsic Prothrombin Activation Pathway	1.67	0.188	NaN	PROS1,F5,THBD
Vitamin-C Transport	1.67	0.188	NaN	TXN,GLRX,SLC2A3
Renal Cell Carcinoma Signaling	1.66	0.0889	2.646	RAP1B,RAPGEF1,RAF1,JUN,RRAS,RPS27A,MAP2K1,RAP1A
GÎ±q Signaling	1.66	0.0741	3.464	PLD4,RAF1,IKBKB,RGS18,Calm1 (includes others),PTK2B,CSK,RHOA,PRKCH,NFKB2,NFKB1,MAP2K1
Relaxin Signaling	1.64	0.0736	2.121	RAP1B,SMPDL3A,GNAI3,PDE2A,JUN,SMPDL3B,NFKB2,NFKB1,ADCY7,MAP2K1,RAP1A,MMP9
IL-1 Signaling	1.64	0.0879	1.633	IKBKB,GNAI3,JUN,MAP3K1,MAPK13,NFKB2,NFKB1,ADCY7
IL-17 Signaling	1.59	0.086	NaN	RAP1B,JUN,RRAS,MAPK13,IL17RA,NFKB1,MAP2K1,RAP1A
Cdc42 Signaling	1.57	0.0719	1.414	ITGB1,B2M,RAF1,JUN,HLA-A,HLA-DMA,ARPC5L,FCER1G,MAPK13,CD3D,HLA-E,ITGA4
CCR5 Signaling in Macrophages	1.56	0.0851	0.816	GNAI3,JUN,Calm1 (includes others),PTK2B,FCER1G,PRKCH,MAPK13,CD3D
Myc Mediated Apoptosis Signaling	1.56	0.0909	NaN	RAP1B,YWHAG,RRAS,YWHAZ,BAX,RAP1A,BCL2
Role of IL-17F in Allergic Inflammatory Airway Diseases	1.55	0.111	2	RAF1,NFKB2,IL17RA,NFKB1,MAP2K1
Amyotrophic Lateral Sclerosis Signaling	1.53	0.0796	-1.667	NAIP,Naip1 (includes others),CAPN1,CAT,GPX1,CAPN2,BAX,BCL2,GRINA
Glioma Invasiveness Signaling	1.53	0.0897	1.134	RAP1B,RRAS,RHOA,ITGAV,PLAUR,RAP1A,MMP9
HER-2 Signaling in Breast Cancer	1.51	0.0833	NaN	RAP1B,ITGB1,RRAS,CDKN1A,PRKCH,CDKN1B,RAP1A,ITGB7
IL-4 Signaling	1.51	0.0833	NaN	RAP1B,PTPN6,IL13RA1,INPP5F,HLA-DMA,HLA-A,RRAS,RAP1A
Sirtuin Signaling Pathway	1.49	0.0616	-2.309	PPARG,UCP2,HSF1,TUBA4A,GLUD1,BAX,NFKB2,NFKB1,JUN,TOMM6,ATG9A,GADD45A,TUBA8,PGAM1,TSPO,GABARAP,SLC25A5,NFE2L2
Melanoma Signaling	1.48	0.0952	1.633	RAP1B,RAF1,RRAS,CDKN1A,MAP2K1,RAP1A
nNOS Signaling in Neurons	1.48	0.106	NaN	Calm1 (includes others),CAPN1,PRKCH,CAPN2,GRINA
Triacylglycerol Biosynthesis	1.48	0.106	-1.342	AGPAT4,AGPAT2,DGAT2,DGAT1,MBOAT7
IL-17A Signaling in Airway Cells	1.48	0.0875	1.134	IKBKB,CXCL3,NFKB2,MAPK13,NFKB1,IL17RA,MAP2K1
GADD45 Signaling	1.47	0.158	NaN	CCND3,GADD45A,CDKN1A
Sphingosine and Sphingosine-1-phosphate Metabolism	1.45	0.25	NaN	ACER3,ASAH1
Sphingomyelin Metabolism	1.45	0.25	NaN	SGMS2,SGMS1
Type II Diabetes Mellitus Signaling	1.44	0.071	1.667	PPARG,SOCS3,IKBKB,CD36,MAP3K1,PKM,PRKCH,NFKB2,NFKB1,TNFRSF1B,SLC27A4
CCR3 Signaling in Eosinophils	1.42	0.073	1.89	RAP1B,RAF1,GNAI3,Calm1 (includes others),RRAS,RHOA,PRKCH,MAPK13,MAP2K1,RAP1A
Histamine Biosynthesis	1.42	1	NaN	HDC
Telomerase Signaling	1.41	0.0756	2.121	RAP1B,RAF1,HSP90AB1,RRAS,CDKN1A,ABL1,MAP2K1,RAP1A,ELF1
Role of JAK2 in Hormone-like Cytokine Signaling	1.4	0.118	NaN	SOCS3,PTPN6,STAT5B,SIRPA
Endothelin-1 Signaling	1.37	0.0653	0.832	RAP1B,RAF1,RRAS,PTGS1,MAPK13,RAP1A,PLA2G7,PLD4,GNAI3,JUN,EDNRA,PRKCH,ADCY7
Coagulation System	1.36	0.114	-1	PROS1,F5,PLAUR,THBD
GÎ±i Signaling	1.35	0.0738	-1	RAP1B,RAF1,GNAI3,LTB4R,CXCR2,RRAS,ADCY7,RAP1A,FPR1
RhoA Signaling	1.33	0.0732	1.667	LPAR6,SEPT5,PTK2B,SEPT9,ARPC5L,RHOA,ARHGEF1,SEPT1,MSN
B Cell Development	1.32	0.111	NaN	PTPRC,SPN,HLA-A,HLA-DMA
Melanocyte Development and Pigmentation Signaling	1.32	0.0762	2.121	RAP1B,RAF1,PTPN6,RRAS,MAP2K1,ADCY7,RAP1A,BCL2
Remodeling of Epithelial Adherens Junctions	1.32	0.087	NaN	TUBA8,TUBB6,ARPC5L,TUBA4A,ZYX,VCL
Antiproliferative Role of Somatostatin Receptor 2	1.31	0.0805	1.134	RAP1B,PTPN6,RRAS,CDKN1A,CDKN1B,RAP1A,MAP2K1
Estrogen-Dependent Breast Cancer Signaling	1.31	0.0805	2.646	RAP1B,JUN,RRAS,NFKB2,STAT5B,NFKB1,RAP1A
ErbB Signaling	1.3	0.0755	2.121	RAP1B,RAF1,JUN,RRAS,PRKCH,MAPK13,MAP2K1,RAP1A
Role of IL-17A in Arthritis	1.29	0.0857	NaN	CXCL3,NFKB2,MAPK13,NFKB1,IL17RA,MAP2K1
Semaphorin Signaling in Neurons	1.29	0.0943	NaN	DPYSL2,ITGB1,FYN,SEMA4D,RHOA
Complement System	1.29	0.108	NaN	C5AR1,C3,CFH,ITGAX
Synaptic Long Term Potentiation	1.28	0.0714	2.333	RAP1B,RAF1,Calm1 (includes others),CAMK2D,RRAS,PRKCH,MAP2K1,RAP1A,GRINA
HIF1Î± Signaling	1.28	0.0714	NaN	RAP1B,JUN,RRAS,MMP8,MAPK13,MMP25,RAP1A,MMP9,SLC2A3
Calcium Signaling	1.27	0.0631	1.897	RAP1B,RCAN1,CAMK2D,Calm1 (includes others),ATP2B1,MEF2A,ATP2A3,MEF2C,MCU,ASPH,RAP1A,CAMKK2,GRINA
Calcium Transport I	1.27	0.2	NaN	ATP2B1,ATP2A3
CNTF Signaling	1.27	0.0845	2.449	RAP1B,LIFR,RAF1,RRAS,MAP2K1,RAP1A
Regulation of Actin-based Motility by Rho	1.27	0.0787	1.633	ITGB1,RAC2,ARPC5L,RHOA,ARHGDIA,GSN,ITGA4
Insulin Receptor Signaling	1.25	0.068	1.897	RAP1B,FYN,SOCS3,RAF1,RAPGEF1,INPP5F,SGK1,RRAS,MAP2K1,RAP1A
Melatonin Signaling	1.24	0.0833	0.447	RAF1,GNAI3,CAMK2D,Calm1 (includes others),PRKCH,MAP2K1
PAK Signaling	1.24	0.0734	2.828	RAP1B,ITGB1,RAF1,PTK2B,RRAS,MAP2K1,RAP1A,ITGA4
Tight Junction Signaling	1.24	0.0655	NaN	TGFBR2,JUN,TGFBR1,CLDN1,RHOA,HSF1,NFKB2,VCL,NFKB1,TNFRSF1B,VASP
Inhibition of Matrix Metalloproteases	1.22	0.103	NaN	MMP8,MMP25,LRP1,MMP9
Huntington's Disease Signaling	1.22	0.0595	0.707	SGK1,Hspa1b,HSPA1A/HSPA1B,HIP1,BAX,HSPA5,TGM2,HSPA8,CTSD,JUN,POLR2E,CAPN1,RPS27A,PRKCH,CAPN2
IL-22 Signaling	1.21	0.125	NaN	SOCS3,MAPK13,STAT5B
FLT3 Signaling in Hematopoietic Progenitor Cells	1.2	0.0761	1.89	RAP1B,RAF1,RRAS,MAPK13,STAT5B,RAP1A,MAP2K1
Pentose Phosphate Pathway	1.2	0.182	NaN	PGD,TKT
UDP-N-acetyl-D-galactosamine Biosynthesis II	1.2	0.182	NaN	GPI,HK3
SAPK/JNK Signaling	1.19	0.0714	2.121	RAP1B,RAC2,JUN,GADD45A,RRAS,MAP3K1,FCER1G,RAP1A
CDP-diacylglycerol Biosynthesis I	1.16	0.12	NaN	AGPAT4,AGPAT2,MBOAT7
Role of PKR in Interferon Induction and Antiviral Response	1.15	0.0976	NaN	IKBKB,NFKB2,NFKB1,FCGR1A
Mouse Embryonic Stem Cell Pluripotency	1.15	0.0702	2.121	RAP1B,LIFR,RAF1,RRAS,MAPK13,RAP1A,MAP2K1,TCF7L2
Estrogen Receptor Signaling	1.14	0.0672	NaN	RAP1B,RAF1,DDX5,POLR2E,RRAS,GTF2A1,MAP2K1,RAP1A,NCOA3
Glutamate Biosynthesis II	1.12	0.5	NaN	GLUD1
Glutamate Degradation X	1.12	0.5	NaN	GLUD1
Antiproliferative Role of TOB in T Cell Signaling	1.12	0.115	NaN	TGFBR2,TGFBR1,CDKN1B
MIF Regulation of Innate Immunity	1.12	0.0952	2	JUN,NFKB2,CD74,NFKB1
Role of JAK1 and JAK3 in Î³c Cytokine Signaling	1.11	0.0769	NaN	RAP1B,SOCS3,PTK2B,RRAS,STAT5B,RAP1A
Phosphatidylglycerol Biosynthesis II (Non-plastidic)	1.08	0.111	NaN	AGPAT4,AGPAT2,MBOAT7
ErbB4 Signaling	1.07	0.075	2.449	RAP1B,RAF1,RRAS,PRKCH,MAP2K1,RAP1A
NAD Phosphorylation and Dephosphorylation	1.06	0.154	NaN	Acp5,NADK
IL-15 Production	1.05	0.107	NaN	PTK2B,NFKB2,NFKB1
SPINK1 General Cancer Pathway	1.03	0.0732	2.449	RAP1B,RAF1,RRAS,IL6R,MAP2K1,RAP1A
Neurotrophin/TRK Signaling	0.991	0.0714	2.449	RAP1B,RAF1,JUN,RRAS,MAP2K1,RAP1A
Gap Junction Signaling	0.987	0.0577	NaN	RAP1B,RAF1,GNAI3,TUBA8,TUBB6,RRAS,CSNK1A1,TUBA4A,PRKCH,ADCY7,MAP2K1,RAP1A
IL-9 Signaling	0.983	0.0851	1	SOCS3,NFKB2,NFKB1,STAT5B
Clathrin-mediated Endocytosis Signaling	0.975	0.0574	NaN	HSPA8,ITGB1,APOE,CD2AP,ARRB2,TF,ARPC5L,RPS27A,S100A8,APOC2,HIP1,ITGB7
Sphingosine-1-phosphate Signaling	0.959	0.0635	0	S1PR4,GNAI3,ACER3,PTK2B,S1PR5,RHOA,ADCY7,ASAH1
NAD biosynthesis II (from tryptophan)	0.959	0.133	NaN	HAAO,ABL1
Diphthamide Biosynthesis	0.959	0.333	NaN	EEF2
NADH Repair	0.959	0.333	NaN	GAPDH
Thyroid Hormone Biosynthesis	0.959	0.333	NaN	CTSD
S-adenosyl-L-methionine Biosynthesis	0.959	0.333	NaN	MAT2A
GÎ±s Signaling	0.936	0.0654	2.646	ADD1,HCK,MAP2K1,ADCY7,ADORA2A,RAP1A,ADRB2
Autoimmune Thyroid Disease Signaling	0.932	0.0816	NaN	HLA-A,HLA-DMA,FCER1G,HLA-E
Eicosanoid Signaling	0.928	0.0735	NaN	LTA4H,LTB4R,PTGS1,ALOX5,PLA2G7
Glutathione-mediated Detoxification	0.914	0.0938	NaN	MGST1,MGST2,GSTP1
Parkinson's Signaling	0.91	0.125	NaN	SEPT5,MAPK13
Lymphotoxin Î² Receptor Signaling	0.907	0.0725	1	IKBKB,VCAM1,NFKB2,NFKB1,TRAF1
EGF Signaling	0.889	0.0714	1.342	RAF1,JUN,MAP3K1,MAPK13,MAP2K1
Amyloid Processing	0.886	0.0784	NaN	CAPN1,CSNK1A1,CAPN2,MAPK13
Aldosterone Signaling in Epithelial Cells	0.883	0.0575	2.236	HSPA8,RAF1,HSP90AB1,DUSP1,SGK1,SLC12A2,HSPA1A/HSPA1B,PRKCH,HSPA5,MAP2K1
RhoGDI Signaling	0.873	0.0571	-2.333	ITGB1,GNAI3,ARPC5L,RHOA,ARHGEF1,ARHGDIA,ARHGEF3,ARHGDIB,MSN,ITGA4
Th17 Activation Pathway	0.87	0.0659	1.633	SOCS3,HSP90AB1,IL6R,FCER1G,NFKB2,NFKB1
MIF-mediated Glucocorticoid Regulation	0.857	0.0882	NaN	NFKB2,CD74,NFKB1
Factors Promoting Cardiogenesis in Vertebrates	0.854	0.0652	NaN	TGFBR2,TGFBR1,PRKCH,MEF2C,LRP1,TCF7L2
Endometrial Cancer Signaling	0.851	0.0694	2.236	RAP1B,RAF1,RRAS,MAP2K1,RAP1A
Ephrin B Signaling	0.851	0.0694	0.447	RAC2,GNAI3,ABI1,CXCR4,RHOA
Uracil Degradation II (Reductive)	0.842	0.25	NaN	DPYSL2
Pentose Phosphate Pathway (Oxidative Branch)	0.842	0.25	NaN	PGD
Spermine and Spermidine Degradation I	0.842	0.25	NaN	SAT1
Ascorbate Recycling (Cytosolic)	0.842	0.25	NaN	GLRX
Thymine Degradation	0.842	0.25	NaN	DPYSL2
Acetate Conversion to Acetyl-CoA	0.842	0.25	NaN	ACSS1
Androgen Signaling	0.824	0.0588	2.236	GNAI3,Calm1 (includes others),JUN,POLR2E,PRKCH,NFKB2,NFKB1,GTF2A1
VEGF Family Ligand-Receptor Interactions	0.793	0.0625	2.449	RAP1B,RAF1,RRAS,PRKCH,MAP2K1,RAP1A
Sumoylation Pathway	0.793	0.0625	-0.816	JUN,RHOA,ARHGDIA,NFKB2,NFKB1,ARHGDIB
Trehalose Degradation II (Trehalase)	0.752	0.2	NaN	HK3
Protein Citrullination	0.752	0.2	NaN	PADI4
Creatine-phosphate Biosynthesis	0.752	0.2	NaN	CKB
Tetrapyrrole Biosynthesis II	0.752	0.2	NaN	ALAS1
Myo-inositol Biosynthesis	0.752	0.2	NaN	INPP5F
CTLA4 Signaling in Cytotoxic T Lymphocytes	0.721	0.0594	NaN	B2M,FYN,PTPN6,HLA-A,FCER1G,CD3D
Role of PI3K/AKT Signaling in the Pathogenesis of Influenza	0.719	0.0625	1	GNAI3,NFKB2,NFKB1,MAP2K1,PLAC8
Endoplasmic Reticulum Stress Pathway	0.719	0.0952	NaN	XBP1,HSPA5
SPINK1 Pancreatic Cancer Pathway	0.708	0.0667	-2	TGFBR2,CTSA,TGFBR1,CTSB
Glioblastoma Multiforme Signaling	0.69	0.0529	1.414	RAP1B,RAF1,RRAS,RHOA,CDKN1A,CDKN1B,MAP2K1,RAP1A,E2F2
Mechanisms of Viral Exit from Host Cells	0.686	0.0732	NaN	CHMP2B,PRKCH,LMNB1
Arginine Biosynthesis IV	0.68	0.167	NaN	GLUD1
Proline Biosynthesis II (from Arginine)	0.68	0.167	NaN	PADI4
Zymosterol Biosynthesis	0.68	0.167	NaN	LBR
Rapoport-Luebering Glycolytic Shunt	0.68	0.167	NaN	PGAM1
Lactose Degradation III	0.68	0.167	NaN	PSAP
GDP-mannose Biosynthesis	0.68	0.167	NaN	GPI
Wnt/Î²-catenin Signaling	0.672	0.0523	0.707	TGFBR2,JUN,TGFBR1,RARA,CSNK1A1,RPS27A,SOX13,LRP1,TCF7L2
Intrinsic Prothrombin Activation Pathway	0.666	0.0714	NaN	PROS1,F5,THBD
tRNA Splicing	0.666	0.0714	NaN	SMPDL3A,PDE2A,SMPDL3B
CREB Signaling in Neurons	0.662	0.0502	2.53	RAP1B,RAF1,GNAI3,Calm1 (includes others),CAMK2D,POLR2E,RRAS,PRKCH,ADCY7,MAP2K1,RAP1A
Pyrimidine Deoxyribonucleotides De Novo Biosynthesis I	0.66	0.087	NaN	RRM2,CMPK1
Sperm Motility	0.66	0.0547	1.342	SLC16A10,PDE2A,Calm1 (includes others),PTK2B,SLC12A2,PRKCH,PLA2G7
Activation of IRF by Cytosolic Pattern Recognition Receptors	0.658	0.0635	1	IKBKB,JUN,NFKB2,NFKB1
eNOS Signaling	0.652	0.0517	0	HSPA8,LPAR6,Calm1 (includes others),HSP90AB1,Hspa1b,HSPA1A/HSPA1B,PRKCH,HSPA5,ADCY7
Role of Hypercytokinemia/hyperchemokinemia in the Pathogenesis of Influenza	0.646	0.0698	NaN	CCR1,IL36G,IL1RN
Allograft Rejection Signaling	0.635	0.0581	NaN	B2M,HLA-A,HLA-DMA,FCER1G,HLA-E
Tumoricidal Function of Hepatic Natural Killer Cells	0.633	0.0833	NaN	BAX,ITGAL
Role of RIG1-like Receptors in Antiviral Innate Immunity	0.627	0.0682	NaN	IKBKB,NFKB2,NFKB1
FcÎ³RIIB Signaling in B Lymphocytes	0.622	0.0575	1.342	RAP1B,RRAS,LYN,DOK1,RAP1A
NAD Biosynthesis from 2-amino-3-carboxymuconate Semialdehyde	0.622	0.143	NaN	ABL1
Thioredoxin Pathway	0.622	0.143	NaN	TXN
Pentose Phosphate Pathway (Non-oxidative Branch)	0.622	0.143	NaN	TKT
Aspartate Degradation II	0.622	0.143	NaN	MDH2
Protein Ubiquitination Pathway	0.622	0.048	NaN	B2M,PSMB10,HLA-A,UBE2N,HSPA1A/HSPA1B,ANAPC10,HSPA5,USP39,PSMD8,UBE2F,HSPA8,HSP90AB1,RPS27A
Mitotic Roles of Polo-Like Kinase	0.611	0.0606	NaN	HSP90AB1,PLK2,CAPN1,ANAPC10
Ethanol Degradation IV	0.607	0.08	NaN	CAT,ACSS1
UVB-Induced MAPK Signaling	0.582	0.0588	1	JUN,PRKCH,MAPK13,MAP2K1
Superoxide Radicals Degradation	0.572	0.125	NaN	CAT
Tryptophan Degradation to 2-amino-3-carboxymuconate Semialdehyde	0.572	0.125	NaN	HAAO
FGF Signaling	0.559	0.0543	0.447	RAF1,PTPN6,MAP3K1,MAPK13,MAP2K1
Nitric Oxide Signaling in the Cardiovascular System	0.558	0.0522	2.449	PDE2A,Calm1 (includes others),HSP90AB1,ATP2A3,PRKCH,MAP2K1
Synaptic Long Term Depression	0.55	0.0484	2.333	RAP1B,RAF1,GNAI3,RRAS,LYN,PRKCH,PLA2G7,MAP2K1,RAP1A
Role of Pattern Recognition Receptors in Recognition of Bacteria and Viruses	0.55	0.0504	0.816	C3,C5AR1,TLR7,OSM,PRKCH,NFKB2,NFKB1
Dopamine-DARPP32 Feedback in cAMP Signaling	0.544	0.0491	1.89	GNAI3,Calm1 (includes others),CSNK1A1,ATP2A3,PRKCH,ADCY7,CAMKK2,GRINA
Pathogenesis of Multiple Sclerosis	0.529	0.111	NaN	CCR1
Prostanoid Biosynthesis	0.529	0.111	NaN	PTGS1
Leucine Degradation I	0.529	0.111	NaN	MCCC2
Heme Biosynthesis II	0.529	0.111	NaN	ALAS1
Primary Immunodeficiency Signaling	0.524	0.06	NaN	PTPRC,TNFRSF13B,CD3D
G Beta Gamma Signaling	0.517	0.0504	1.633	RAP1B,RAF1,GNAI3,RRAS,PRKCH,RAP1A
ATM Signaling	0.504	0.0515	1	JUN,GADD45A,CDKN1A,ABL1,MAPK13
Hypoxia Signaling in the Cardiovascular System	0.503	0.0541	NaN	JUN,HSP90AB1,UBE2N,UBE2F
GDP-glucose Biosynthesis	0.491	0.1	NaN	HK3
TR/RXR Activation	0.474	0.05	NaN	HP,SLC16A3,UCP2,SCARB1,NCOA3
ILK Signaling	0.469	0.0457	2.646	ITGB1,JUN,RHOA,VIM,NFKB2,VCL,NFKB1,MMP9,ITGB7
Docosahexaenoic Acid (DHA) Signaling	0.467	0.0556	NaN	BAX,BCL2A1,BCL2
Triacylglycerol Degradation	0.467	0.0556	NaN	ABHD12,MGLL,PRDX6
Glucose and Glucose-1-phosphate Degradation	0.457	0.0909	NaN	HK3
Circadian Rhythm Signaling	0.442	0.0606	NaN	BHLHE40,GRINA
Hereditary Breast Cancer Signaling	0.441	0.0461	NaN	RAP1B,GADD45A,POLR2E,RRAS,CDKN1A,RPS27A,RAP1A
Role of BRCA1 in DNA Damage Response	0.437	0.05	1	RBL2,GADD45A,CDKN1A,E2F2
Glutamate Receptor Signaling	0.429	0.0526	NaN	Calm1 (includes others),SLC38A1,GRINA
Guanosine Nucleotides Degradation III	0.427	0.0833	NaN	GDA
BER pathway	0.427	0.0833	NaN	PNKP
Ethanol Degradation II	0.426	0.0588	NaN	DHRS9,ACSS1
Gustation Pathway	0.426	0.0455	NaN	SMPDL3A,PDE2A,LPAR6,P2RY6,SMPDL3B,ADCY7,P2RX7
Role of NANOG in Mammalian Embryonic Stem Cell Pluripotency	0.423	0.0462	2.449	RAP1B,LIFR,RAF1,RRAS,MAP2K1,RAP1A
Fatty Acid Activation	0.4	0.0769	NaN	SLC27A4
Choline Biosynthesis III	0.4	0.0769	NaN	PLD4
Cholesterol Biosynthesis I	0.4	0.0769	NaN	LBR
Glycogen Degradation II	0.4	0.0769	NaN	PYGL
Bile Acid Biosynthesis, Neutral Pathway	0.4	0.0769	NaN	CYP27A1
Cholesterol Biosynthesis II (via 24,25-dihydrolanosterol)	0.4	0.0769	NaN	LBR
Cholesterol Biosynthesis III (via Desmosterol)	0.4	0.0769	NaN	LBR
Adipogenesis pathway	0.391	0.0448	NaN	PPARG,AGPAT2,XBP1,CEBPD,FABP4,STAT5B
GP6 Signaling Pathway	0.384	0.0444	2.449	RAP1B,FYN,Calm1 (includes others),FCER1G,LYN,PRKCH
Growth Hormone Signaling	0.379	0.0465	0	SOCS3,PTPN6,PRKCH,STAT5B
DNA Double-Strand Break Repair by Homologous Recombination	0.376	0.0714	NaN	ABL1
Colanic Acid Building Blocks Biosynthesis	0.376	0.0714	NaN	GPI
Notch Signaling	0.368	0.0526	NaN	NOTCH2,HES1
p53 Signaling	0.362	0.0442	0	JUN,GADD45A,CDKN1A,BAX,BCL2
UVA-Induced MAPK Signaling	0.362	0.0442	NaN	RAP1B,JUN,RRAS,MAPK13,RAP1A
Glycogen Degradation III	0.354	0.0667	NaN	PYGL
Cardiac Î²-adrenergic Signaling	0.35	0.0429	0.447	SMPDL3A,PDE2A,AKAP8,ATP2A3,SMPDL3B,ADCY7
Apelin Cardiomyocyte Signaling Pathway	0.347	0.0435	-0.447	GNAI3,CAT,ATP2A3,PRKCH,MAPK13
Granzyme B Signaling	0.333	0.0625	NaN	LMNB1
Chondroitin Sulfate Degradation (Metazoa)	0.333	0.0625	NaN	GM2A
Human Embryonic Stem Cell Pluripotency	0.319	0.0414	NaN	TGFBR2,S1PR4,TGFBR1,S1PR5,INHBA,TCF7L2
Mitochondrial Dysfunction	0.318	0.0409	NaN	GSR,UCP2,PRDX5,CAT,COX7A2L,HTRA2,BCL2
Î³-linolenate Biosynthesis II (Animals)	0.314	0.0588	NaN	SLC27A4
Dermatan Sulfate Degradation (Metazoa)	0.314	0.0588	NaN	GM2A
Mitochondrial L-carnitine Shuttle Pathway	0.314	0.0588	NaN	SLC27A4
D-myo-inositol (1,4,5)-trisphosphate Degradation	0.314	0.0588	NaN	INPP5F
Neuroprotective Role of THOP1 in Alzheimer's Disease	0.312	0.0417	NaN	HLA-A,HTRA2,HLA-E,ACE,MMP9
1D-myo-inositol Hexakisphosphate Biosynthesis II (Mammalian)	0.298	0.0556	NaN	INPP5F
D-myo-inositol (1,3,4)-trisphosphate Biosynthesis	0.298	0.0556	NaN	INPP5F
Stearate Biosynthesis I (Animals)	0.297	0.0455	NaN	SLC27A4,MBOAT7
Purine Nucleotides Degradation II (Aerobic)	0.281	0.0526	NaN	GDA
Role of Oct4 in Mammalian Embryonic Stem Cell Pluripotency	0.277	0.0435	NaN	RARA,MEF2A
Dermatan Sulfate Biosynthesis (Late Stages)	0.277	0.0435	NaN	CHST12,DSE
GPCR-Mediated Integration of Enteroendocrine Signaling Exemplified by an L Cell	0.274	0.0411	NaN	GNAI3,ADCY7,ADRB2
Cardiomyocyte Differentiation via BMP Receptors	0.267	0.05	NaN	MEF2C
Granzyme A Signaling	0.267	0.05	NaN	HMGB2
The Visual Cycle	0.267	0.05	NaN	DHRS9
Maturity Onset Diabetes of Young (MODY) Signaling	0.253	0.0476	NaN	GAPDH
Oxidative Ethanol Degradation III	0.253	0.0476	NaN	ACSS1
Hematopoiesis from Pluripotent Stem Cells	0.249	0.0408	NaN	FCER1G,CD3D
Role of Wnt/GSK-3Î² Signaling in the Pathogenesis of Influenza	0.246	0.039	NaN	CSNK1A1,TCF7L2,NCOA3
Assembly of RNA Polymerase II Complex	0.24	0.04	NaN	POLR2E,GTF2A1
Methionine Degradation I (to Homocysteine)	0.24	0.0455	NaN	MAT2A
Differential Regulation of Cytokine Production in Intestinal Epithelial Cells by IL-17A and IL-17F	0.228	0.0435	NaN	LCN2
Superpathway of D-myo-inositol (1,4,5)-trisphosphate Metabolism	0.228	0.0435	NaN	INPP5F
Putrescine Degradation III	0.228	0.0435	NaN	SAT1
TCA Cycle II (Eukaryotic)	0.216	0.0417	NaN	MDH2
Cysteine Biosynthesis III (mammalia)	0.216	0.0417	NaN	MAT2A
Tryptophan Degradation III (Eukaryotic)	0.206	0.04	NaN	HAAO
NAD Salvage Pathway II	0.196	0.0385	NaN	Acp5
PXR/RXR Activation	0	0.0154	NaN	ALAS1
Role of Cytokines in Mediating Communication between Immune Cells	0	0.037	NaN	IL36G,IL1RN
Cellular Effects of Sildenafil (Viagra)	0	0.0229	NaN	PDE2A,Calm1 (includes others),ADCY7
Neuropathic Pain Signaling In Dorsal Horn Neurons	0	0.0256	NaN	CAMK2D,PRKCH,GRINA
Cell Cycle Regulation by BTG Family Proteins	0	0.027	NaN	E2F2
Role of CHK Proteins in Cell Cycle Checkpoint Control	0	0.0351	NaN	CDKN1A,E2F2
Basal Cell Carcinoma Signaling	0	0.0139	NaN	TCF7L2
G Protein Signaling Mediated by Tubby	0	0.0323	NaN	ABL1
Retinoic acid Mediated Apoptosis Signaling	0	0.0161	NaN	RARA
AMPK Signaling	0	0.0365	-0.707	RAB27A,EEF2,CDKN1A,MAPK13,MLST8,CAMKK2,RAB6A,ADRB2
Leptin Signaling in Obesity	0	0.0341	NaN	SOCS3,ADCY7,MAP2K1
Transcriptional Regulatory Network in Embryonic Stem Cells	0	0.037	NaN	L1CAM,SKIL
nNOS Signaling in Skeletal Muscle Cells	0	0.0244	NaN	Calm1 (includes others)
Ephrin A Signaling	0	0.0323	NaN	FYN,RHOA
Netrin Signaling	0	0.0154	NaN	RAC2
Heparan Sulfate Biosynthesis	0	0.0241	NaN	CHST12,PRDX6
Retinoate Biosynthesis I	0	0.0294	NaN	DHRS9
Heparan Sulfate Biosynthesis (Late Stages)	0	0.0263	NaN	CHST12,PRDX6
Pyrimidine Ribonucleotides De Novo Biosynthesis	0	0.0217	NaN	CMPK1
D-myo-inositol (1,4,5)-Trisphosphate Biosynthesis	0	0.037	NaN	PLD4
Phospholipases	0	0.0317	NaN	PLD4,PLA2G7
Chondroitin Sulfate Biosynthesis	0	0.0175	NaN	CHST12
Dermatan Sulfate Biosynthesis	0	0.0339	NaN	CHST12,DSE
Serotonin Degradation	0	0.0135	NaN	DHRS9
Retinol Biosynthesis	0	0.0238	NaN	DHRS9
Pyrimidine Ribonucleotides Interconversion	0	0.0227	NaN	CMPK1
Chondroitin Sulfate Biosynthesis (Late Stages)	0	0.0204	NaN	CHST12
Noradrenaline and Adrenaline Degradation	0	0.027	NaN	DHRS9
Fatty Acid Î²-oxidation I	0	0.0312	NaN	SLC27A4
Superpathway of Methionine Degradation	0	0.027	NaN	MAT2A
Superpathway of Cholesterol Biosynthesis	0	0.0357	NaN	LBR
Oxidative Phosphorylation	0	0.00917	NaN	COX7A2L
HIPPO signaling	0	0.0235	NaN	YWHAG,YWHAZ
PCP pathway	0	0.0328	NaN	JUN,RHOA
Wnt/Ca+ pathway	0	0.0323	NaN	NFKB2,NFKB1
Nucleotide Excision Repair Pathway	0	0.0286	NaN	POLR2E
GABA Receptor Signaling	0	0.0316	NaN	RPS27A,GABARAP,ADCY7
Serotonin Receptor Signaling	0	0.0233	NaN	ADCY7
Phototransduction Pathway	0	0.0189	NaN	GNGT2
Sonic Hedgehog Signaling	0	0.0333	NaN	ARRB2
Dopamine Receptor Signaling	0	0.013	NaN	ADCY7
GPCR-Mediated Nutrient Sensing in Enteroendocrine Cells	0	0.0357	1	GNAI3,PRKCH,ADCY7,FFAR2
NER Pathway	0	0.0194	NaN	POLR2E,UBE2N
Apelin Pancreas Signaling Pathway	0	0.0339	NaN	NFKB2,NFKB1

## Sheet: C4 vs All
Supplementary Table 6d: Ingenuity Pathway Analysis of Cluster 4 Macrophages compared to all non-cluster 4 macrophages
Ingenuity Canonical Pathways	-log(p-value)	Ratio	z-score	Molecules
Cell Cycle: G2/M DNA Damage Checkpoint Regulation	9.19	0.286	2.887	YWHAG,CKS2,CDKN1A,TOP2A,ABL1,CKS1B,YWHAZ,CCNB2,PKMYT1,FBXL5,PLK1,AURKA,CDK1,CCNB1
B Cell Receptor Signaling	9.16	0.139	3	RAP1B,RAF1,RAC2,PTPN6,Calm1 (includes others),PTK2B,BAD,POU2F2,CSK,MAP3K1,ABL1,MAPK13,NFKB1,BCL6,FCGR2B,RAP1A,PTPRC,IKBKB,JUN,INPP5F,PPP3R1,LYN,PIK3AP1,MEF2C,RASSF5,BCL2A1,MAP2K1
Leukocyte Extravasation Signaling	7.63	0.122	1.46	RAP1B,RAC2,SPN,MYL6,PTK2B,ABL1,MAPK13,MMP25,MMP8,CYBB,RASSF5,VCL,VASP,ITGA4,ITGB1,CXCR4,RDX,RAP1A,ITGAL,ITGB2,NCF1,RASGRP1,PECAM1,ACTG1,MMP9,MSN
EIF2 Signaling	7.58	0.118	3.873	RAP1B,RAF1,EIF4A2,RPL35A,RPL7,RPS11,BCL2,RPS7,RPL27A,RPL13,RPL18A,RPS5,MAP2K1,RPS24,RPS19,RPL3,RPS8,RPL17,EIF4G3,RPS21,RAP1A,EIF3F,RPL8,RPS4Y1,RPL10,RPL6,RPS14
Caveolar-mediated Endocytosis Signaling	6.95	0.197	NaN	B2M,ITGB1,COPZ1,HLA-A,CD48,ABL1,FLOT1,ITGAL,ITGB2,FLOT2,ITGAV,ACTG1,ITGAX,ITGA4
Protein Kinase A Signaling	6.34	0.0877	1.095	RAP1B,RAF1,TGFBR1,Calm1 (includes others),BAD,MYL6,PTK2B,NFKB1,DUSP2,TGFBR2,PTPRC,CDKN3,DUSP5,DUSP3,PTPRJ,PPP3R1,SMPDL3B,MAP2K1,VASP,MYL12A,SMPDL3A,PDE2A,PTPN6,YWHAG,MAP3K1,YWHAZ,PYGL,RAP1A,DUSP1,ADD1,EBI3,ADCY7,TCF7L2,SIRPA,DUSP16
IL-10 Signaling	6.25	0.188	NaN	CCR1,IL1R2,SOCS3,IKBKB,IL36G,JUN,IL10RA,IL1B,LBP,MAPK13,NFKB1,FCGR2B,IL18RAP
STAT3 Pathway	6.19	0.136	1.508	RAP1B,RAF1,SOCS3,PTPN6,TGFBR1,IL6R,MAPK13,IL17RA,RAP1A,IL18RAP,BCL2,IL1R2,TGFBR2,CXCR2,CDKN1A,IL10RA,IL1B,MAP2K1
Acute Phase Response Signaling	6.12	0.119	0.894	RAP1B,RAF1,SOCS3,FN1,C3,MAP3K1,IL6R,MAPK13,NFKB1,RAP1A,IKBKB,FTL,HP,IL36G,JUN,TF,OSM,IL1B,LBP,TNFRSF1B,MAP2K1
PTEN Signaling	5.96	0.138	-2.183	RAP1B,ITGB1,RAC2,RAF1,TGFBR1,SHARPIN,BAD,NFKB1,RAP1A,BCL2,TGFBR2,IKBKB,INPP5F,CDKN1A,CDKN1B,MAP2K1,ITGA4
Chronic Myeloid Leukemia Signaling	5.79	0.142	NaN	RAP1B,RAF1,RBL2,TGFBR1,TFDP1,BAD,ABL1,NFKB1,RAP1A,TGFBR2,IKBKB,CDKN1A,CDKN1B,STAT5B,MAP2K1,E2F2
Aryl Hydrocarbon Receptor Signaling	5.71	0.127	-1.291	MGST1,RBL2,TFDP1,BAX,NFKB1,NCOA3,TGM2,CTSD,CCNA2,JUN,CCND3,MGST2,RARA,CDKN1A,IL1B,CDKN1B,NFE2L2,GSTP1
IL-8 Signaling	5.63	0.108	1.342	RAP1B,RAC2,RAF1,PTK2B,BAX,NFKB1,RAP1A,BCL2,PLD4,ITGB2,IKBKB,ARRB2,JUN,CCND3,CXCR2,ITGAV,CYBB,MAP2K1,MMP9,VASP,LASP1,ITGAX
Role of Macrophages, Fibroblasts and Endothelial Cells in Rheumatoid Arthritis	5.56	0.0898	NaN	RAP1B,RAF1,SOCS3,Calm1 (includes others),FN1,CEBPD,CSNK1A1,IL17RA,NFKB1,IL1R2,IKBKB,IL36G,JUN,PPP3R1,TLR7,OSM,LTBR,TNFRSF1B,MAP2K1,FCGR3A/FCGR3B,TRAF1,C5AR1,IL6R,RAP1A,CEBPE,IL18RAP,IL1B,TCF7L2,LRP1
Glucocorticoid Receptor Signaling	5.4	0.0865	NaN	RAP1B,RAF1,TGFBR1,SGK1,POU2F2,Hspa1b,HSPA1A/HSPA1B,SLPI,MAPK13,NFKB1,BCL2,IL1R2,TGFBR2,CXCL3,IKBKB,JUN,ANXA1,PPP3R1,STAT5B,MAP2K1,ADRB2,MAP3K1,KRT80,CD3D,RAP1A,NCOA3,HSPA8,DUSP1,CDKN1A,IL1B
LXR/RXR Activation	5.39	0.132	1.5	APOE,C3,CD36,ABCG1,APOC2,NFKB1,IL18RAP,IL1R2,IL36G,TF,IL1B,S100A8,LBP,PLTP,TNFRSF1B,MMP9
Granulocyte Adhesion and Diapedesis	5.38	0.111	NaN	ITGB1,SELL,C5AR1,CXCR4,RDX,MMP25,ITGAL,IL18RAP,IL1R2,CXCL3,ITGB2,IL36G,CXCR2,MMP8,IL1B,PECAM1,TNFRSF1B,MMP9,MSN,ITGA4
Regulation of eIF4 and p70S6K Signaling	5.37	0.115	2.449	RAP1B,ITGB1,RPS19,RAF1,RPS8,EIF4G3,RPS21,EIF4A2,MAPK13,RAP1A,RPS11,RPS7,RPS4Y1,EIF3F,RPS5,MAP2K1,RPS24,RPS14,ITGA4
Apoptosis Signaling	5.29	0.146	-2.138	RAP1B,RAF1,IKBKB,BAD,CAPN1,HTRA2,BAX,NFKB1,TNFRSF1B,BCL2A1,MAP2K1,RAP1A,CDK1,BCL2
Regulation of IL-2 Expression in Activated and Anergic T Lymphocytes	5.13	0.151	NaN	RAP1B,RAF1,TGFBR1,Calm1 (includes others),MAP3K1,NFKB1,RAP1A,CD3D,TGFBR2,IKBKB,JUN,PPP3R1,MAP2K1
PPAR Signaling	5.03	0.139	-1.604	PPARG,RAP1B,RAF1,NFKB1,RAP1A,IL18RAP,IL1R2,IKBKB,IL36G,JUN,IL1B,TNFRSF1B,STAT5B,MAP2K1
Osteoarthritis Pathway	4.86	0.0995	0.229	ITGB1,PPARG,TGFBR1,FN1,ITLN1,HES1,NFKB1,IL18RAP,TGFBR2,IL1R2,S100A9,CXCR2,IL1B,S100A8,MEF2C,MYBBP1A,TNFRSF1B,MMP9,LRP1,TCF7L2,ITGA4
PI3K Signaling in B Lymphocytes	4.77	0.119	3.5	RAP1B,RAF1,C3,Calm1 (includes others),ABL1,NFKB1,FCGR2B,RAP1A,PTPRC,IKBKB,JUN,CD180,PPP3R1,LYN,PIK3AP1,MAP2K1
IL-6 Signaling	4.74	0.118	1.291	RAP1B,SOCS3,RAF1,IL6R,MAPK13,NFKB1,RAP1A,IL18RAP,IL1R2,IKBKB,IL36G,JUN,IL1B,LBP,TNFRSF1B,MAP2K1
Unfolded protein response	4.73	0.179	NaN	HSPA8,PPARG,Hspa1b,HSPA1A/HSPA1B,CEBPD,XBP1,CD82,NFE2L2,BCL2,CEBPE
IL-17A Signaling in Fibroblasts	4.71	0.229	NaN	IKBKB,JUN,LCN2,CEBPD,MAPK13,NFKB1,IL17RA,NFKBIZ
Pancreatic Adenocarcinoma Signaling	4.71	0.123	1.667	RAF1,TGFBR1,TFDP1,BAD,ABL1,NFKB1,BIRC5,BCL2,PLD4,TGFBR2,CDKN1A,CDKN1B,MAP2K1,E2F2,MMP9
Cyclins and Cell Cycle Regulation	4.69	0.148	-3	RAF1,CCNA2,CCND3,TFDP1,CDKN1A,ABL1,CCNB2,FBXL5,CDKN1B,E2F2,CDK1,CCNB1
Glycolysis I	4.69	0.269	-1.89	PGK1,GPI,ENO3,PGAM1,PKM,ALDOA,GAPDH
Gluconeogenesis I	4.69	0.269	-1.89	PGK1,GPI,ENO3,PGAM1,ALDOA,GAPDH,MDH2
Th1 and Th2 Activation Pathway	4.58	0.102	NaN	CCR1,SOCS3,TGFBR1,HLA-A,CXCR4,IKZF1,HAVCR2,IL6R,IFNGR1,CRLF2,NFKB1,CD3D,TGFBR2,ITGB2,NOTCH2,JUN,IL10RA,CD274,STAT5B
Agranulocyte Adhesion and Diapedesis	4.42	0.099	NaN	ITGB1,SELL,C5AR1,FN1,MYL6,CXCR4,RDX,MMP25,CXCL3,ITGB2,IL36G,CXCR2,MMP8,IL1B,PECAM1,ACTG1,MMP9,MSN,ITGA4
PI3K/AKT Signaling	4.42	0.116	2.324	RAP1B,ITGB1,RAF1,YWHAG,BAD,YWHAZ,NFKB1,RAP1A,BCL2,IKBKB,INPP5F,CDKN1A,CDKN1B,MAP2K1,ITGA4
autophagy	4.39	0.164	NaN	CTSZ,CTSD,CTSA,ATG9A,CTSS,WIPI1,ATG3,LAMP1,CTSB,BCL2
Ceramide Signaling	4.37	0.129	1.387	RAP1B,RAF1,BAD,S1PR5,MAP3K1,NFKB1,RAP1A,BCL2,S1PR4,CTSD,JUN,TNFRSF1B,MAP2K1
Molecular Mechanisms of Cancer	4.34	0.0761	NaN	RAP1B,RAF1,RAPGEF1,RAC2,TGFBR1,BAD,ABL1,ARHGEF1,MAPK13,NFKB1,BCL2,TGFBR2,JUN,CCND3,ARHGEF3,MAP2K1,E2F2,ITGA4,ITGB1,TFDP1,BAX,AURKA,RAP1A,CDK1,MAX,RASGRP1,CDKN1A,CDKN1B,ADCY7,LRP1
Production of Nitric Oxide and Reactive Oxygen Species in Macrophages	4.3	0.0969	2	RAP1B,APOE,PTPN6,MAP3K1,APOC2,IFNGR1,MAPK13,NFKB1,RAP1A,IKBKB,NCF1,JUN,CAT,CYBB,S100A8,IRF8,TNFRSF1B,MAP2K1,SIRPA
T Cell Receptor Signaling	4.3	0.12	NaN	RAP1B,RAF1,Calm1 (includes others),CSK,MAP3K1,NFKB1,RAP1A,CD3D,PTPRC,IKBKB,JUN,PPP3R1,RASGRP1,MAP2K1
Phagosome Maturation	4.28	0.108	NaN	B2M,ATP6V1D,TUBB4B,HLA-A,PRDX5,TUBA4A,TUBB,PRDX6,CTSZ,CTSD,CTSA,CTSS,CTSB,LAMP1,CYBB,ATP6V1G1
TNFR2 Signaling	4.25	0.233	1.89	TANK,IKBKB,JUN,MAP3K1,TNFRSF1B,NFKB1,TRAF1
Hepatic Fibrosis / Hepatic Stellate Cell Activation	4.1	0.0968	NaN	IGFBP4,TGFBR1,FN1,MYL6,IL6R,IFNGR1,BAX,NFKB1,IL18RAP,BCL2,TGFBR2,IL1R2,CXCL3,IL10RA,IL1B,LBP,TNFRSF1B,MMP9
Integrin Signaling	4.07	0.0905	2.357	RAP1B,ITGB1,RAPGEF1,RAC2,RAF1,ABL1,GSN,RAP1A,ITGAL,ITGB2,CAPN1,ITGAV,ZYX,VCL,MAP2K1,ACTG1,VASP,MYL12A,ITGAX,ITGA4
14-3-3-mediated Signaling	4.04	0.108	1.897	RAP1B,RAF1,YWHAG,BAD,TUBB4B,YWHAZ,TUBA4A,VIM,BAX,TUBB,RAP1A,SRPK2,JUN,CDKN1B,MAP2K1
LPS/IL-1 Mediated Inhibition of RXR Function	4.02	0.0897	-1.387	APOE,MGST1,MAP3K1,APOC2,ABCG1,ALAS1,IL18RAP,IL1R2,IL36G,JUN,MGST2,SCARB1,RARA,CAT,FABP4,IL1B,LBP,PLTP,TNFRSF1B,GSTP1
Adrenomedullin signaling pathway	3.98	0.0918	2.065	RAP1B,CRCP,PPARG,RAF1,Calm1 (includes others),C3,PTK2B,BAD,CSK,BAX,MAPK13,NFKB1,RAP1A,BCL2,IL36G,MAX,IL1B,ADCY7,MAP2K1
Phospholipase C Signaling	3.94	0.0861	2.668	RAP1B,ITGB1,RAF1,Calm1 (includes others),MYL6,ARHGEF1,FCGR2B,NFKB1,CD3D,RAP1A,TGM2,PLD4,PPP3R1,FCER1G,LYN,MEF2C,ARHGEF3,ADCY7,MAP2K1,MYL12A,ITGA4
Role of NFAT in Regulation of the Immune Response	3.89	0.0933	2.828	RAP1B,RAF1,Calm1 (includes others),HLA-A,CSNK1A1,FCGR2B,NFKB1,CD3D,RAP1A,IKBKB,RCAN1,JUN,PPP3R1,FCER1G,LYN,MEF2C,MAP2K1,FCGR3A/FCGR3B
Glutathione Redox Reactions I	3.89	0.25	-0.816	GSR,MGST1,MGST2,GPX1,PRDX6,GSTP1
Inhibition of Angiogenesis by TSP1	3.88	0.206	1.89	TGFBR2,CD47,JUN,TGFBR1,CD36,MAPK13,MMP9
Actin Cytoskeleton Signaling	3.81	0.0866	1.147	RAP1B,ITGB1,RAC2,RAF1,FN1,MYL6,CSK,RDX,ARHGEF1,GSN,SSH1,RAP1A,VCL,LBP,SSH2,MAP2K1,ACTG1,MYL12A,MSN,ITGA4
FAT10 Cancer Signaling Pathway	3.81	0.174	2.828	TGFBR2,IKBKB,EEF1A1,MAD2L1,TGFBR1,CXCR4,TNFRSF1B,NFKB1
Role of Osteoblasts, Osteoclasts and Chondrocytes in Rheumatoid Arthritis	3.71	0.0851	NaN	ITGB1,Calm1 (includes others),PTK2B,BAD,CSNK1A1,GSN,NFKB1,CSF1R,IL18RAP,BCL2,IL1R2,IKBKB,IL36G,JUN,PPP3R1,MMP8,IL1B,TNFRSF1B,LRP1,TCF7L2
Estrogen-mediated S-phase Entry	3.68	0.231	-2.236	CCNA2,TFDP1,CDKN1A,CDKN1B,E2F2,CDK1
Prostate Cancer Signaling	3.66	0.117	NaN	RAP1B,RAF1,TFDP1,BAD,CDKN1A,ABL1,CDKN1B,NFKB1,MAP2K1,RAP1A,GSTP1,BCL2
Induction of Apoptosis by HIV1	3.65	0.148	1.667	IKBKB,SLC25A4,CXCR4,HTRA2,BAX,NFKB1,TNFRSF1B,BCL2,TRAF1
NRF2-mediated Oxidative Stress Response	3.64	0.0891	1.604	RAP1B,RAF1,MGST1,MAP3K1,RAP1A,MAFG,GSR,FTL,JUN,MGST2,SCARB1,PMF1/PMF1-BGLAP,CAT,TXN,MAP2K1,ACTG1,NFE2L2,GSTP1
PPARÎ±/RXRÎ± Activation	3.6	0.0914	-1.698	RAP1B,RAF1,TGFBR1,CD36,NFKB1,RAP1A,NCOA3,IL18RAP,TGFBR2,IL1R2,IKBKB,JUN,IL1B,MEF2C,STAT5B,ADCY7,MAP2K1
Toll-like Receptor Signaling	3.57	0.132	1.134	IKBKB,IL36G,JUN,MAP3K1,TLR7,IL1B,MAPK13,LBP,NFKB1,TRAF1
Paxillin Signaling	3.56	0.107	0.333	ITGB1,RAP1B,PTK2B,CSK,MAPK13,ITGAL,RAP1A,ITGB2,ITGAV,VCL,ACTG1,ITGAX,ITGA4
Regulation of Cellular Mechanics by Calpain Protease	3.54	0.143	2.121	ITGB1,RAP1B,CCNA2,CAPN1,VCL,CDKN1B,RAP1A,CDK1,ITGA4
FcÎ³ Receptor-mediated Phagocytosis in Macrophages and Monocytes	3.5	0.12	0.905	PLD4,RAC2,NCF1,PTK2B,HCK,LYN,FYB1,ACTG1,VASP,FGR,FCGR3A/FCGR3B
April Mediated Signaling	3.49	0.179	1.89	IKBKB,JUN,MAP3K1,TNFRSF13B,MAPK13,NFKB1,TRAF1
NF-ÎºB Activation by Viruses	3.38	0.116	3.317	ITGB1,RAP1B,RAF1,IKBKB,ITGB2,MAP3K1,ITGAV,NFKB1,ITGAL,RAP1A,ITGA4
GÎ±12/13 Signaling	3.37	0.0979	3.207	RAP1B,RAF1,MYL6,PTK2B,MAP3K1,ARHGEF1,NFKB1,RAP1A,IKBKB,LPAR6,JUN,MEF2C,MAP2K1,MYL12A
Type I Diabetes Mellitus Signaling	3.35	0.108	0.632	SOCS3,IKBKB,HLA-A,FCER1G,IL1B,IFNGR1,MAPK13,NFKB1,TNFRSF1B,CD3D,HLA-E,BCL2
B Cell Activating Factor Signaling	3.35	0.171	1.89	IKBKB,JUN,MAP3K1,TNFRSF13B,MAPK13,NFKB1,TRAF1
Cell Cycle: G1/S Checkpoint Regulation	3.34	0.134	2.646	RBL2,MAX,CCND3,TFDP1,CDKN1A,ABL1,FBXL5,CDKN1B,E2F2
Atherosclerosis Signaling	3.32	0.102	NaN	ITGB2,APOE,IL36G,CXCR4,CD36,IL1B,S100A8,APOC2,NFKB1,ALOX5,PLA2G7,MMP9,ITGA4
Natural Killer Cell Signaling	3.26	0.1	NaN	RAP1B,RAC2,RAF1,PTPN6,LAIR1,SH3BP2,RAP1A,CD300A,INPP5F,FCER1G,SH2D1B,MAP2K1,FCGR3A/FCGR3B
Role of Tissue Factor in Cancer	3.19	0.0985	NaN	RAP1B,ITGB1,ARRB2,PTK2B,ITGAV,HCK,LYN,IL1B,PLAUR,MAPK13,STAT5B,RAP1A,FGR
Epithelial Adherens Junction Signaling	3.19	0.094	NaN	RAP1B,RAPGEF1,TGFBR1,MYL6,TUBB4B,TUBA4A,TUBB,RAP1A,TGFBR2,NOTCH2,ZYX,VCL,ACTG1,TCF7L2
4-1BB Signaling in T Lymphocytes	3.16	0.188	1.633	IKBKB,JUN,MAPK13,NFKB1,MAP2K1,TRAF1
CD28 Signaling in T Helper Cells	3.13	0.097	1.897	PTPN6,Calm1 (includes others),HLA-A,CSK,MAP3K1,NFKB1,CD3D,PTPRC,IKBKB,JUN,PPP3R1,FCER1G,MAP2K1
Virus Entry via Endocytic Pathways	3.11	0.102	NaN	AP3S1,ITGB1,RAP1B,B2M,ITGB2,RAC2,HLA-A,ABL1,ITGAL,ACTG1,RAP1A,ITGA4
NF-ÎºB Signaling	3.11	0.0856	2.84	RAP1B,RAF1,TGFBR1,MAP3K1,NFKB1,RAP1A,TANK,IL1R2,TGFBR2,IKBKB,IL36G,FCER1G,TLR7,IL1B,LTBR,TNFRSF1B
Role of IL-17A in Psoriasis	3.11	0.308	NaN	CXCL3,S100A9,S100A8,IL17RA
Th2 Pathway	3.1	0.0921	0.632	CCR1,SOCS3,TGFBR1,CXCR4,HLA-A,IKZF1,CRLF2,NFKB1,CD3D,TGFBR2,ITGB2,NOTCH2,JUN,STAT5B
iNOS Signaling	3.09	0.156	1.342	IKBKB,Calm1 (includes others),JUN,IFNGR1,MAPK13,LBP,NFKB1
T Helper Cell Differentiation	3.06	0.123	NaN	TGFBR2,TGFBR1,HLA-A,IL6R,FCER1G,IL10RA,IFNGR1,BCL6,TNFRSF1B
mTOR Signaling	3.05	0.0817	2	RAP1B,RPS19,RPS8,EIF4G3,RPS21,EIF4A2,PRR5L,RAP1A,RPS11,PLD4,RPS7,DGKZ,RPS4Y1,EIF3F,RPS5,RPS24,RPS14
RANK Signaling in Osteoclasts	3.04	0.106	2.111	RAF1,IKBKB,JUN,Calm1 (includes others),PTK2B,PPP3R1,MAP3K1,MAPK13,NFKB1,GSN,MAP2K1
IL-3 Signaling	2.98	0.111	2.53	RAP1B,RAF1,RAPGEF1,PTPN6,JUN,BAD,PPP3R1,STAT5B,MAP2K1,RAP1A
TREM1 Signaling	2.97	0.12	1.667	ITGB1,CXCL3,TLR7,IL1B,CD83,NFKB1,FCGR2B,STAT5B,ITGAX
Agrin Interactions at Neuromuscular Junction	2.97	0.12	1.667	ITGB1,RAP1B,ITGB2,RAC2,JUN,ITGAL,ACTG1,RAP1A,ITGA4
JAK/Stat Signaling	2.94	0.11	1.265	RAP1B,SOCS3,RAF1,PTPN6,JUN,CDKN1A,NFKB1,STAT5B,MAP2K1,RAP1A
Signaling by Rho Family GTPases	2.91	0.0754	2.524	ITGB1,RAF1,SEPT9,PTK2B,MYL6,RDX,VIM,ARHGEF1,NFKB1,SEPT1,STMN1,JUN,CYBB,ARHGEF3,MAP2K1,ACTG1,MYL12A,MSN,ITGA4
Sirtuin Signaling Pathway	2.9	0.0719	-1.155	PGK1,POLR1D,PPARG,ATP5MC1,SLC25A4,UCP2,HSF1,ATG3,NDUFV3,TUBA4A,NDUFB8,BAX,NFKB1,JUN,ATG9A,PGAM1,TSPO,GABARAP,VDAC1,ATP5PB,NFE2L2
Chemokine Signaling	2.89	0.117	2.333	RAP1B,RAF1,JUN,Calm1 (includes others),PTK2B,CXCR4,MAPK13,MAP2K1,RAP1A
TGF-Î² Signaling	2.87	0.108	2.121	TGFBR2,RAP1B,ZFYVE9,RAF1,JUN,TGFBR1,MAPK13,MAP2K1,RAP1A,BCL2
IL-7 Signaling Pathway	2.87	0.108	-0.333	JUN,CCND3,BAD,LYN,CDKN1B,MAPK13,BAX,BCL6,STAT5B,BCL2
Colorectal Cancer Metastasis Signaling	2.85	0.0745	1.5	RAP1B,TGFBR1,BAD,IL6R,IFNGR1,BAX,NFKB1,MMP25,RAP1A,BIRC5,TGFBR2,JUN,MMP8,TLR7,ADCY7,MAP2K1,MMP9,LRP1,TCF7L2
VDR/RXR Activation	2.85	0.115	-1.342	SERPINB1,CAMP,CDKN1A,MXD1,CDKN1B,HES1,THBD,KLF4,NCOA3
Systemic Lupus Erythematosus Signaling	2.85	0.0763	NaN	RAP1B,PTPN6,HLA-A,IL6R,FCGR2B,CD3D,RAP1A,PTPRC,IL36G,JUN,CD72,TLR7,FCER1G,LYN,IL1B,PRPF40A,HLA-E,FCGR3A/FCGR3B
Role of JAK family kinases in IL-6-type Cytokine Signaling	2.84	0.2	NaN	SOCS3,IL6R,OSM,MAPK13,STAT5B
D-myo-inositol (1,4,5,6)-Tetrakisphosphate Biosynthesis	2.84	0.0903	3.051	PTPRC,SOCS3,ATP1A1,DUSP5,PTPN6,INPP5F,PTPRJ,DUSP1,PPM1H,NUDT4,DUSP2,SIRPA,DUSP16
D-myo-inositol (3,4,5,6)-tetrakisphosphate Biosynthesis	2.84	0.0903	3.051	PTPRC,SOCS3,ATP1A1,DUSP5,PTPN6,INPP5F,PTPRJ,DUSP1,PPM1H,NUDT4,DUSP2,SIRPA,DUSP16
Germ Cell-Sertoli Cell Junction Signaling	2.84	0.0833	NaN	RAP1B,ITGB1,RAC2,TGFBR1,TUBB4B,MAP3K1,TUBA4A,TUBB,GSN,RAP1A,TGFBR2,ZYX,VCL,ACTG1,MAP2K1
D-myo-inositol-5-phosphate Metabolism	2.84	0.0864	3.207	SOCS3,PTPN6,DUSP2,PLD4,PTPRC,ATP1A1,DUSP5,INPP5F,PTPRJ,DUSP1,PPM1H,NUDT4,SIRPA,DUSP16
Reelin Signaling in Neurons	2.83	0.106	NaN	ITGB1,ITGB2,APOE,HCK,LYN,ARHGEF1,ARHGEF3,ITGAL,FGR,ITGA4
Bladder Cancer Signaling	2.83	0.106	2	RAP1B,RAF1,TFDP1,MMP8,CDKN1A,ABL1,MMP25,MAP2K1,RAP1A,MMP9
T Cell Exhaustion Signaling Pathway	2.79	0.0824	2.111	RAP1B,PTPN6,TGFBR1,HLA-A,HAVCR2,IL6R,BCL6,RAP1A,TGFBR2,JUN,PDCD1LG2,IL10RA,FCER1G,CD274,HLA-E
Apelin Adipocyte Signaling Pathway	2.77	0.112	-1	MGST1,MGST2,CAT,GPX1,CYBB,MAPK13,ADCY7,PRDX6,GSTP1
Renin-Angiotensin Signaling	2.75	0.0923	2.714	RAP1B,RAF1,PTPN6,JUN,PTK2B,MAP3K1,MAPK13,NFKB1,ADCY7,MAP2K1,RAP1A,ACE
IL-12 Signaling and Production in Macrophages	2.74	0.0878	NaN	PPARG,JMJD6,IKBKB,APOE,JUN,S100A8,APOC2,IFNGR1,IRF8,MAPK13,REL,NFKB1,MAP2K1
GM-CSF Signaling	2.74	0.111	2.828	RAP1B,RAF1,PPP3R1,HCK,LYN,BCL2A1,STAT5B,MAP2K1,RAP1A
Mitotic Roles of Polo-Like Kinase	2.73	0.121	-0.816	PTTG1,PLK2,CAPN1,CCNB2,PKMYT1,PLK1,CDK1,CCNB1
Airway Pathology in Chronic Obstructive Pulmonary Disease	2.7	0.375	NaN	CXCL3,MMP8,MMP9
ERK/MAPK Signaling	2.69	0.078	1.941	RAP1B,PPARG,ITGB1,RAPGEF1,RAF1,RAC2,YWHAG,BAD,PTK2B,YWHAZ,RAP1A,DUSP2,ELF1,DUSP1,MAP2K1,ITGA4
Acute Myeloid Leukemia Signaling	2.66	0.101	2.333	RAP1B,RAF1,BAD,RARA,NFKB1,STAT5B,MAP2K1,RAP1A,CSF1R,TCF7L2
Opioid Signaling Pathway	2.65	0.0732	2.5	RAP1B,RAC2,RAF1,GRK4,Calm1 (includes others),RGS18,BAD,NFKB1,RAP1A,GRINA,ARRB2,PPP3R1,HCK,LYN,CDKN1B,ADCY7,MAP2K1,FGR
Oncostatin M Signaling	2.64	0.15	1.633	RAP1B,RAF1,OSM,STAT5B,MAP2K1,RAP1A
p38 MAPK Signaling	2.6	0.0932	-0.302	TGFBR2,IL1R2,IL36G,TGFBR1,MAX,DUSP1,IL1B,MEF2C,MAPK13,TNFRSF1B,IL18RAP
Iron homeostasis signaling pathway	2.56	0.0876	NaN	FTL,HP,ATP6V1D,TF,IL6R,SLC40A1,FBXL5,ATP6V1G1,STAT5B,LRP1,SLC11A1,HFE
Breast Cancer Regulation by Stathmin1	2.55	0.0755	NaN	RAP1B,RAF1,Calm1 (includes others),TUBB4B,TUBA4A,ARHGEF1,TUBB,RAP1A,CDK1,STMN1,CDKN1A,CDKN1B,ARHGEF3,MAP2K1,ADCY7,E2F2
Neuroinflammation Signaling Pathway	2.54	0.0671	2.4	B2M,TGFBR1,HLA-A,IL6R,IFNGR1,MAPK13,CX3CR1,NFKB1,CSF1R,BIRC5,BCL2,GRINA,TGFBR2,IKBKB,JUN,PPP3R1,TLR7,CYBB,IL1B,NFE2L2,MMP9
Small Cell Lung Cancer Signaling	2.52	0.103	1.342	IKBKB,MAX,TFDP1,ABL1,CKS1B,CDKN1B,NFKB1,BCL2,TRAF1
HGF Signaling	2.51	0.0909	2.53	ITGB1,RAP1B,RAF1,RAPGEF1,JUN,MAP3K1,CDKN1A,MAP2K1,RAP1A,ELF1,ITGA4
Erythropoietin Signaling	2.49	0.102	NaN	RAP1B,SOCS3,RAF1,PTPN6,JUN,NFKB1,STAT5B,MAP2K1,RAP1A
3-phosphoinositide Degradation	2.49	0.0823	3.051	PTPRC,SOCS3,ATP1A1,DUSP5,PTPN6,INPP5F,PTPRJ,DUSP1,PPM1H,NUDT4,DUSP2,SIRPA,DUSP16
Dendritic Cell Maturation	2.48	0.0765	2.53	B2M,HLA-A,CD83,MAPK13,NFKB1,FCGR2B,IKBKB,IL36G,FCER1G,IL1B,LY75,IRF8,LTBR,TNFRSF1B,FCGR3A/FCGR3B
Crosstalk between Dendritic Cells and Natural Killer Cells	2.45	0.101	NaN	HLA-A,TLR7,CD83,LTBR,NFKB1,TNFRSF1B,ITGAL,ACTG1,HLA-E
GADD45 Signaling	2.45	0.211	NaN	CCND3,CDKN1A,CDK1,CCNB1
Hepatic Cholestasis	2.44	0.0812	NaN	IL1R2,IKBKB,IL36G,JUN,CYP27A1,RARA,OSM,IL1B,LBP,NFKB1,TNFRSF1B,ADCY7,IL18RAP
Rac Signaling	2.43	0.0887	3.317	ITGB1,RAP1B,RAF1,JUN,PTK2B,MAP3K1,CYBB,NFKB1,MAP2K1,RAP1A,ITGA4
FAK Signaling	2.42	0.0935	NaN	ITGB1,RAP1B,RAF1,CAPN1,CSK,VCL,ACTG1,MAP2K1,RAP1A,ITGA4
Nur77 Signaling in T Lymphocytes	2.4	0.119	NaN	Calm1 (includes others),HLA-A,PPP3R1,NR4A1,FCER1G,CD3D,BCL2
FXR/RXR Activation	2.38	0.0873	NaN	PPARG,APOE,IL36G,C3,TF,SCARB1,CYP27A1,RARA,IL1B,APOC2,PLTP
Cytotoxic T Lymphocyte-mediated Apoptosis of Target Cells	2.35	0.156	NaN	B2M,HLA-A,FCER1G,CD3D,BCL2
Cardiac Hypertrophy Signaling	2.35	0.0702	3.153	RAP1B,RAF1,TGFBR1,Calm1 (includes others),MYL6,MAP3K1,IL6R,MAPK13,RAP1A,TGFBR2,JUN,PPP3R1,MEF2C,ADCY7,MAP2K1,ADRB2,MYL12A
G-Protein Coupled Receptor Signaling	2.35	0.0671	NaN	SMPDL3A,RAP1B,RAF1,GRK4,PDE2A,RGS18,PTK2B,NFKB1,RAP1A,IKBKB,LTB4R,DUSP1,CXCR2,RASGRP1,SMPDL3B,ADORA2A,ADCY7,MAP2K1,ADRB2
Sertoli Cell-Sertoli Cell Junction Signaling	2.35	0.0765	NaN	RAP1B,ITGB1,RAF1,TUBB4B,MAP3K1,TUBA4A,MAPK13,TUBB,RAP1A,JUN,VCL,MAP2K1,ACTG1,ITGA4
Neuregulin Signaling	2.33	0.0968	1.89	ITGB1,RAP1B,RAF1,BAD,CDKN1B,STAT5B,MAP2K1,RAP1A,ITGA4
ErbB2-ErbB3 Signaling	2.31	0.104	2.449	RAP1B,RAF1,JUN,BAD,CDKN1B,STAT5B,MAP2K1,RAP1A
VEGF Signaling	2.3	0.0901	1.897	RAP1B,RAF1,PTPN6,PTK2B,BAD,VCL,ACTG1,MAP2K1,RAP1A,BCL2
LPS-stimulated MAPK Signaling	2.27	0.0947	1.414	RAP1B,RAF1,IKBKB,JUN,MAPK13,LBP,NFKB1,MAP2K1,RAP1A
PEDF Signaling	2.27	0.0947	1.667	RAP1B,PPARG,RAF1,IKBKB,MAPK13,NFKB1,RAP1A,TCF7L2,BCL2
cAMP-mediated signaling	2.26	0.0705	1.807	SMPDL3A,GRK4,RAF1,PDE2A,RGS18,Calm1 (includes others),RAP1A,LTB4R,CXCR2,DUSP1,PPP3R1,SMPDL3B,MAP2K1,ADCY7,ADORA2A,ADRB2
IGF-1 Signaling	2.25	0.0885	1.89	RAP1B,IGFBP4,SOCS3,RAF1,JUN,YWHAG,BAD,YWHAZ,MAP2K1,RAP1A
Role of MAPK Signaling in the Pathogenesis of Influenza	2.24	0.101	NaN	RAP1B,RAF1,BAX,MAPK13,PLA2G7,MAP2K1,RAP1A,BCL2
Communication between Innate and Adaptive Immune Cells	2.24	0.0938	NaN	B2M,IL36G,HLA-A,TLR7,FCER1G,IL1B,CD83,TNFRSF13B,HLA-E
Polyamine Regulation in Colon Cancer	2.21	0.182	NaN	PPARG,MAX,MXD1,SAT1
Salvage Pathways of Pyrimidine Ribonucleotides	2.21	0.0928	1	GRK4,APOBEC1,SGK1,CSNK1A1,CMPK1,PLK1,ADPGK,MAP2K1,CDK1
UVC-Induced MAPK Signaling	2.19	0.122	1.633	RAP1B,RAF1,JUN,MAPK13,MAP2K1,RAP1A
CD40 Signaling	2.18	0.0988	1.134	TANK,IKBKB,JUN,PTGS1,MAPK13,NFKB1,MAP2K1,TRAF1
Glutathione Redox Reactions II	2.17	0.5	NaN	GSR,GLRX
Pyridoxal 5'-phosphate Salvage Pathway	2.16	0.108	0.378	GRK4,SGK1,CSNK1A1,PLK1,ADPGK,MAP2K1,CDK1
TNFR1 Signaling	2.15	0.12	1.633	TANK,IKBKB,JUN,MADD,MAP3K1,NFKB1
Interferon Signaling	2.13	0.139	1.342	IFITM3,IFNGR1,BAX,IFITM2,BCL2
Calcium-induced T Lymphocyte Apoptosis	2.13	0.106	0.816	Calm1 (includes others),HLA-A,PPP3R1,NR4A1,FCER1G,ATP2A3,CD3D
Th1 Pathway	2.11	0.0803	1.414	SOCS3,ITGB2,NOTCH2,HLA-A,HAVCR2,IL6R,IL10RA,IFNGR1,CD274,NFKB1,CD3D
Axonal Guidance Signaling	2.1	0.0562	NaN	RAP1B,RAF1,RAC2,MYL6,ABL1,TUBB,MMP25,ADAM8,PPP3R1,MMP8,ADAM19,PLXNB2,SEMA4A,RASSF5,PLXNB3,MAP2K1,ACE,VASP,ITGA4,MYL12A,ITGB1,CXCR4,TUBB4B,TUBA4A,L1CAM,RAP1A,SEMA4D,MMP9
GDNF Family Ligand-Receptor Interactions	2.08	0.0952	1.89	RAP1B,RAF1,PDLIM7,JUN,DOK2,DOK1,MAP2K1,RAP1A
Ephrin Receptor Signaling	2.08	0.0734	1.941	ITGB1,RAP1B,RAPGEF1,RAF1,RAC2,CXCR4,ABL1,RAP1A,GRINA,ABI1,DOK1,MAP2K1,ITGA4
Role of JAK1, JAK2 and TYK2 in Interferon Signaling	2.07	0.167	NaN	RAF1,PTPN6,IFNGR1,NFKB1
Non-Small Cell Lung Cancer Signaling	2.05	0.0941	2.236	RAP1B,RAF1,TFDP1,BAD,ABL1,RASSF5,RAP1A,MAP2K1
Leukotriene Biosynthesis	2.05	0.231	NaN	LTA4H,MGST2,ALOX5
ERK5 Signaling	2.03	0.101	2.646	RAP1B,YWHAG,BAD,SGK1,YWHAZ,MEF2C,RAP1A
Remodeling of Epithelial Adherens Junctions	2.03	0.101	NaN	TUBB4B,TUBA4A,CBLL1,ZYX,VCL,TUBB,ACTG1
Angiopoietin Signaling	2.02	0.093	0.707	RAP1B,IKBKB,BAD,DOK2,STAT5B,NFKB1,BIRC5,RAP1A
Glioma Signaling	2.02	0.082	2.236	RAP1B,RAF1,RBL2,Calm1 (includes others),TFDP1,CDKN1A,ABL1,MAP2K1,RAP1A,E2F2
IL-17A Signaling in Gastric Cells	2	0.16	NaN	JUN,MAPK13,NFKB1,IL17RA
RhoA Signaling	2	0.0813	1.265	LPAR6,MYL6,PTK2B,SEPT9,RDX,ARHGEF1,ACTG1,SEPT1,MYL12A,MSN
CDK5 Signaling	1.99	0.0857	2.121	ITGB1,RAP1B,RAF1,CAPN1,ABL1,MAPK13,ADCY7,MAP2K1,RAP1A
3-phosphoinositide Biosynthesis	1.98	0.0693	3.207	SOCS3,PTPN6,DUSP2,PTPRC,ATP1A1,DUSP5,INPP5F,PTPRJ,DUSP1,PPM1H,PIK3AP1,NUDT4,SIRPA,DUSP16
iCOS-iCOSL Signaling in T Helper Cells	1.95	0.08	1.134	PTPRC,IKBKB,Calm1 (includes others),BAD,HLA-A,PPP3R1,CSK,FCER1G,NFKB1,CD3D
Antiproliferative Role of TOB in T Cell Signaling	1.94	0.154	NaN	TGFBR2,CCNA2,TGFBR1,CDKN1B
Cholecystokinin/Gastrin-mediated Signaling	1.94	0.0841	2.333	RAP1B,RAF1,IL36G,JUN,PTK2B,IL1B,MEF2C,MAP2K1,RAP1A
IL-2 Signaling	1.93	0.0972	2.449	RAP1B,RAF1,JUN,PTK2B,STAT5B,MAP2K1,RAP1A
Altered T Cell and B Cell Signaling in Rheumatoid Arthritis	1.91	0.0889	NaN	IL36G,PRTN3,HLA-A,TLR7,FCER1G,IL1B,TNFRSF13B,NFKB1
OX40 Signaling Pathway	1.91	0.0889	1.342	B2M,JUN,HLA-A,FCER1G,NFKB1,CD3D,HLA-E,BCL2
PAK Signaling	1.89	0.0826	2.333	ITGB1,RAP1B,RAF1,MYL6,PTK2B,MAP2K1,RAP1A,MYL12A,ITGA4
Antioxidant Action of Vitamin C	1.89	0.0826	-1.633	PLD4,IKBKB,TXN,MAPK13,NFKB1,STAT5B,GLRX,PLA2G7,SLC2A3
Cdc42 Signaling	1.89	0.0719	1	ITGB1,B2M,RAF1,JUN,MYL6,HLA-A,FCER1G,MAPK13,CD3D,HLA-E,MYL12A,ITGA4
Death Receptor Signaling	1.83	0.086	0.378	TANK,IKBKB,HTRA2,NFKB1,TNFRSF1B,ACTG1,ARHGDIB,BCL2
Mitochondrial Dysfunction	1.81	0.0702	NaN	GSR,ATP5MC1,UCP2,Cox6c,PRDX5,CAT,NDUFV3,HTRA2,NDUFB8,VDAC1,ATP5PB,BCL2
Phagosome Formation	1.8	0.0758	NaN	ITGB1,ITGB2,FN1,C5AR1,TLR7,FCER1G,FCGR2B,FCGR3A/FCGR3B,ITGAX,ITGA4
Extrinsic Prothrombin Activation Pathway	1.79	0.188	NaN	F5,F13A1,THBD
Vitamin-C Transport	1.79	0.188	NaN	TXN,GLRX,SLC2A3
Myc Mediated Apoptosis Signaling	1.78	0.0909	NaN	RAP1B,YWHAG,BAD,YWHAZ,BAX,RAP1A,BCL2
Superpathway of Inositol Phosphate Compounds	1.75	0.0633	3.357	SOCS3,PTPN6,DUSP2,PTPRC,PLD4,ATP1A1,DUSP5,INPP5F,PTPRJ,DUSP1,PPM1H,PIK3AP1,NUDT4,SIRPA,DUSP16
ATM Signaling	1.73	0.0825	1.414	JUN,H2AFX,CDKN1A,ABL1,CCNB2,MAPK13,CDK1,CCNB1
Role of IL-17F in Allergic Inflammatory Airway Diseases	1.73	0.111	2	RAF1,IL1B,IL17RA,NFKB1,MAP2K1
PDGF Signaling	1.7	0.0816	2.828	RAP1B,RAF1,JUN,INPP5F,MAP3K1,ABL1,MAP2K1,RAP1A
Thyroid Cancer Signaling	1.69	0.109	NaN	RAP1B,PPARG,MAP2K1,RAP1A,TCF7L2
Melanoma Signaling	1.68	0.0952	1.633	RAP1B,RAF1,BAD,CDKN1A,MAP2K1,RAP1A
BMP signaling pathway	1.64	0.0854	1.89	RAP1B,RAF1,JUN,MAPK13,NFKB1,MAP2K1,RAP1A
HMGB1 Signaling	1.62	0.0709	1.897	RAP1B,JUN,OSM,IL1B,IFNGR1,MAPK13,NFKB1,TNFRSF1B,MAP2K1,RAP1A
Graft-versus-Host Disease Signaling	1.62	0.104	NaN	IL36G,HLA-A,FCER1G,IL1B,HLA-E
Role of NFAT in Cardiac Hypertrophy	1.6	0.0619	2.496	RAP1B,RAF1,TGFBR1,Calm1 (includes others),MAP3K1,CSNK1A1,MAPK13,RAP1A,TGFBR2,RCAN1,PPP3R1,MEF2C,MAP2K1,ADCY7
IL-15 Signaling	1.59	0.0833	NaN	RAP1B,RAF1,MAPK13,STAT5B,NFKB1,MAP2K1,RAP1A
DNA damage-induced 14-3-3Ïƒ Signaling	1.58	0.158	NaN	CCNB2,CDK1,CCNB1
Corticotropin Releasing Hormone Signaling	1.58	0.0699	2.121	RAP1B,RAF1,JUN,Calm1 (includes others),NR4A1,MEF2C,MAPK13,ADCY7,MAP2K1,RAP1A
Role of JAK2 in Hormone-like Cytokine Signaling	1.55	0.118	NaN	SOCS3,PTPN6,STAT5B,SIRPA
Sphingomyelin Metabolism	1.54	0.25	NaN	SGMS2,SGMS1
PKCÎ¸ Signaling in T Lymphocytes	1.52	0.0659	2.111	RAP1B,IKBKB,RAC2,JUN,HLA-A,PPP3R1,MAP3K1,FCER1G,NFKB1,CD3D,RAP1A
Inflammasome pathway	1.52	0.15	NaN	CTSB,IL1B,NFKB1
Coagulation System	1.5	0.114	-1	F5,F13A1,PLAUR,THBD
Fc Epsilon RI Signaling	1.5	0.0709	1	RAP1B,RAF1,RAC2,INPP5F,FCER1G,LYN,MAPK13,MAP2K1,RAP1A
Apelin Endothelial Signaling Pathway	1.5	0.0709	2.333	RAP1B,RAF1,JUN,Calm1 (includes others),MEF2C,NFKB1,ADCY7,MAP2K1,RAP1A
RAR Activation	1.5	0.0632	NaN	DHRS3,JUN,DUSP1,RARA,CSK,MAP3K1,MAPK13,REL,NFKB1,STAT5B,ADCY7,MAP2K1
GNRH Signaling	1.47	0.0647	1.897	RAP1B,RAF1,JUN,Calm1 (includes others),PTK2B,MAP3K1,MAPK13,NFKB1,ADCY7,MAP2K1,RAP1A
fMLP Signaling in Neutrophils	1.46	0.0698	2.333	RAP1B,RAF1,NCF1,Calm1 (includes others),PPP3R1,CYBB,NFKB1,MAP2K1,RAP1A
Histamine Biosynthesis	1.46	1	NaN	HDC
CD27 Signaling in Lymphocytes	1.45	0.0943	2	IKBKB,JUN,MAP3K1,NFKB1,MAP2K1
CXCR4 Signaling	1.44	0.064	1.897	RAP1B,RAF1,JUN,MYL6,CXCR4,LYN,ELMO2,ADCY7,MAP2K1,RAP1A,MYL12A
Ovarian Cancer Signaling	1.44	0.0662	1.342	RAP1B,RAF1,TFDP1,PTGS1,ABL1,MAP2K1,RAP1A,MMP9,TCF7L2,BCL2
Thrombopoietin Signaling	1.43	0.0833	2.449	RAP1B,RAF1,JUN,STAT5B,MAP2K1,RAP1A
Prolactin Signaling	1.43	0.0769	1.89	RAP1B,RAF1,SOCS3,JUN,STAT5B,MAP2K1,RAP1A
Complement System	1.43	0.108	NaN	ITGB2,C3,C5AR1,ITGAX
Docosahexaenoic Acid (DHA) Signaling	1.42	0.0926	NaN	BAD,IL1B,BAX,BCL2A1,BCL2
Î±-Adrenergic Signaling	1.41	0.0761	1.633	RAP1B,RAF1,Calm1 (includes others),PYGL,MAP2K1,ADCY7,RAP1A
FLT3 Signaling in Hematopoietic Progenitor Cells	1.41	0.0761	1.89	RAP1B,RAF1,BAD,MAPK13,STAT5B,RAP1A,MAP2K1
RhoGDI Signaling	1.4	0.0629	-2.111	ITGB1,DGKZ,MYL6,RDX,ARHGEF1,ARHGEF3,ACTG1,ARHGDIB,MYL12A,MSN,ITGA4
Cancer Drug Resistance By Drug Efflux	1.39	0.0909	NaN	RAP1B,RAF1,NFKB1,MAP2K1,RAP1A
Antigen Presentation Pathway	1.39	0.105	NaN	B2M,HLA-A,TAPBP,HLA-E
IL-17 Signaling	1.38	0.0753	NaN	RAP1B,JUN,MAPK13,NFKB1,IL17RA,MAP2K1,RAP1A
Inhibition of Matrix Metalloproteases	1.35	0.103	NaN	MMP8,MMP25,LRP1,MMP9
Endocannabinoid Cancer Inhibition Pathway	1.33	0.0633	1.265	RAF1,CCND3,BAD,CDKN1A,NUPR1,VIM,CDKN1B,ADCY7,MAP2K1,TCF7L2
HER-2 Signaling in Breast Cancer	1.32	0.0729	NaN	ITGB1,RAP1B,ITGB2,BAD,CDKN1A,CDKN1B,RAP1A
IL-22 Signaling	1.32	0.125	NaN	SOCS3,MAPK13,STAT5B
Role of JAK1 and JAK3 in Î³c Cytokine Signaling	1.28	0.0769	NaN	RAP1B,SOCS3,PTK2B,CRLF2,STAT5B,RAP1A
Pentose Phosphate Pathway	1.28	0.182	NaN	PGD,TKT
UDP-N-acetyl-D-galactosamine Biosynthesis II	1.28	0.182	NaN	GPI,HK3
p70S6K Signaling	1.28	0.0643	2.646	RAP1B,RAF1,YWHAG,BAD,EEF2,YWHAZ,LYN,MAP2K1,RAP1A
CDP-diacylglycerol Biosynthesis I	1.27	0.12	NaN	AGPAT4,AGPAT2,MBOAT7
GÎ±q Signaling	1.27	0.0617	3.162	PLD4,RAF1,IKBKB,RGS18,Calm1 (includes others),PTK2B,PPP3R1,CSK,NFKB1,MAP2K1
Relaxin Signaling	1.25	0.0613	1.89	RAP1B,SMPDL3A,PDE2A,JUN,SMPDL3B,NFKB1,ADCY7,MAP2K1,RAP1A,MMP9
IL-17A Signaling in Airway Cells	1.24	0.075	0.816	IKBKB,CXCL3,MAPK13,IL17RA,NFKB1,MAP2K1
Clathrin-mediated Endocytosis Signaling	1.24	0.0574	NaN	AP3S1,HSPA8,ITGB1,ITGB2,APOE,ARRB2,TF,PPP3R1,S100A8,APOC2,HIP1,ACTG1
Lipid Antigen Presentation by CD1	1.23	0.115	NaN	B2M,FCER1G,PSAP
Thrombin Signaling	1.21	0.0569	1.897	RAP1B,RAF1,IKBKB,MYL6,ARHGEF1,ARHGEF3,MAPK13,NFKB1,ADCY7,MAP2K1,RAP1A,MYL12A
Actin Nucleation by ARP-WASP Complex	1.21	0.0806	1.342	RAP1B,ITGB1,RAP1A,VASP,ITGA4
SPINK1 General Cancer Pathway	1.2	0.0732	2.449	RAP1B,RAF1,IL6R,MAP2K1,RAP1A,Mt1
Phosphatidylglycerol Biosynthesis II (Non-plastidic)	1.19	0.111	NaN	AGPAT4,AGPAT2,MBOAT7
Tight Junction Signaling	1.18	0.0595	NaN	TGFBR2,JUN,TGFBR1,MYL6,HSF1,VCL,NFKB1,TNFRSF1B,ACTG1,VASP
NGF Signaling	1.17	0.064	2.828	RAP1B,IKBKB,RAF1,MAP3K1,BAX,NFKB1,MAP2K1,RAP1A
Glycine Degradation (Creatine Biosynthesis)	1.17	0.5	NaN	GATM
Adenine and Adenosine Salvage I	1.17	0.5	NaN	APRT
Insulin Receptor Signaling	1.17	0.0612	1.667	RAP1B,SOCS3,RAF1,RAPGEF1,INPP5F,BAD,SGK1,MAP2K1,RAP1A
HIF1Î± Signaling	1.16	0.0635	NaN	RAP1B,JUN,MMP8,MAPK13,MMP25,RAP1A,SLC2A3,MMP9
Melanocyte Development and Pigmentation Signaling	1.15	0.0667	1.89	RAP1B,RAF1,PTPN6,MAP2K1,ADCY7,RAP1A,BCL2
NAD Phosphorylation and Dephosphorylation	1.14	0.154	NaN	Acp5,NADK
Tec Kinase Signaling	1.14	0.0585	2.53	ITGB1,PTK2B,HCK,FCER1G,LYN,NFKB1,STAT5B,ACTG1,FGR,ITGA4
Endocannabinoid Developing Neuron Pathway	1.13	0.0625	0	RAP1B,RAF1,RAC2,MAPK13,CDKN1B,MAP2K1,ADCY7,RAP1A
GÎ±s Signaling	1.12	0.0654	2.646	ADD1,HCK,MAP2K1,ADCY7,ADORA2A,RAP1A,ADRB2
nNOS Signaling in Neurons	1.11	0.0851	NaN	Calm1 (includes others),CAPN1,PPP3R1,GRINA
Triacylglycerol Biosynthesis	1.11	0.0851	-1	AGPAT4,AGPAT2,DGAT2,MBOAT7
Regulation of the Epithelial-Mesenchymal Transition Pathway	1.1	0.0558	NaN	TGFBR2,RAP1B,RAF1,NOTCH2,TGFBR1,ZEB2,NFKB1,MAP2K1,RAP1A,MMP9,TCF7L2
Antiproliferative Role of Somatostatin Receptor 2	1.1	0.069	0.816	RAP1B,PTPN6,CDKN1A,CDKN1B,MAP2K1,RAP1A
Sonic Hedgehog Signaling	1.08	0.1	NaN	ARRB2,CDK1,CCNB1
Eicosanoid Signaling	1.07	0.0735	NaN	LTA4H,LTB4R,PTGS1,ALOX5,PLA2G7
Regulation of Actin-based Motility by Rho	1.06	0.0674	0.447	ITGB1,RAC2,MYL6,GSN,ITGA4,MYL12A
Macropinocytosis Signaling	1.06	0.0674	2	RAP1B,ITGB1,ITGB2,ABI1,RAP1A,CSF1R
Renal Cell Carcinoma Signaling	1.05	0.0667	2.449	RAP1B,RAPGEF1,RAF1,JUN,MAP2K1,RAP1A
NAD biosynthesis II (from tryptophan)	1.03	0.133	NaN	HAAO,ABL1
Role of IL-17A in Arthritis	1.03	0.0714	NaN	CXCL3,MAPK13,NFKB1,IL17RA,MAP2K1
EGF Signaling	1.03	0.0714	1.342	RAF1,JUN,MAP3K1,MAPK13,MAP2K1
IL-1 Signaling	1.03	0.0659	1.342	IKBKB,JUN,MAP3K1,MAPK13,NFKB1,ADCY7
Glutathione-mediated Detoxification	1.02	0.0938	NaN	MGST1,MGST2,GSTP1
CNTF Signaling	1.01	0.0704	2.236	RAP1B,LIFR,RAF1,MAP2K1,RAP1A
Mouse Embryonic Stem Cell Pluripotency	1.01	0.0614	1.89	RAP1B,LIFR,RAF1,MAPK13,RAP1A,MAP2K1,TCF7L2
Diphthamide Biosynthesis	1	0.333	NaN	EEF2
NADH Repair	1	0.333	NaN	GAPDH
Thyroid Hormone Biosynthesis	1	0.333	NaN	CTSD
Calcium Signaling	1	0.0534	1.134	RAP1B,RCAN1,Calm1 (includes others),MYL6,PPP3R1,ATP2A3,MCU,MEF2C,ASPH,RAP1A,GRINA
Endometrial Cancer Signaling	0.991	0.0694	2.236	RAP1B,RAF1,BAD,MAP2K1,RAP1A
CCR5 Signaling in Macrophages	0.979	0.0638	1	JUN,Calm1 (includes others),PTK2B,FCER1G,MAPK13,CD3D
Gap Junction Signaling	0.979	0.0529	NaN	RAP1B,RAF1,TUBB4B,PPP3R1,CSNK1A1,TUBA4A,TUBB,ACTG1,ADCY7,MAP2K1,RAP1A
Telomerase Signaling	0.932	0.0588	1.633	RAP1B,RAF1,CDKN1A,ABL1,MAP2K1,RAP1A,ELF1
TWEAK Signaling	0.928	0.0857	NaN	IKBKB,NFKB1,TRAF1
B Cell Development	0.9	0.0833	NaN	PTPRC,SPN,HLA-A
Glioma Invasiveness Signaling	0.883	0.0641	0.447	RAP1B,ITGAV,PLAUR,RAP1A,MMP9
Pentose Phosphate Pathway (Oxidative Branch)	0.883	0.25	NaN	PGD
Spermine and Spermidine Degradation I	0.883	0.25	NaN	SAT1
Ascorbate Recycling (Cytosolic)	0.883	0.25	NaN	GLRX
Acetate Conversion to Acetyl-CoA	0.883	0.25	NaN	ACSS1
Role of CHK Proteins in Cell Cycle Checkpoint Control	0.879	0.0702	2	CDKN1A,PLK1,E2F2,CDK1
ILK Signaling	0.845	0.0508	0.707	ITGB1,ITGB2,JUN,FN1,MYL6,VIM,VCL,NFKB1,ACTG1,MMP9
Synaptic Long Term Potentiation	0.842	0.0556	1.89	RAP1B,RAF1,Calm1 (includes others),PPP3R1,MAP2K1,RAP1A,GRINA
SPINK1 Pancreatic Cancer Pathway	0.821	0.0667	-2	TGFBR2,CTSA,TGFBR1,CTSB
Xenobiotic Metabolism Signaling	0.818	0.0468	NaN	RAP1B,RAF1,MGST1,MAP3K1,MAPK13,NFKB1,RAP1A,FTL,MGST2,CAT,IL1B,MAP2K1,NFE2L2,GSTP1
ErbB Signaling	0.799	0.0566	1.633	RAP1B,RAF1,JUN,MAPK13,MAP2K1,RAP1A
Huntington's Disease Signaling	0.793	0.0476	-0.447	HSPA8,TGM2,CTSD,ATP5MC1,JUN,SGK1,Hspa1b,CAPN1,HSPA1A/HSPA1B,HIP1,BAX,ATP5PB
Trehalose Degradation II (Trehalase)	0.793	0.2	NaN	HK3
Protein Citrullination	0.793	0.2	NaN	PADI4
Tetrapyrrole Biosynthesis II	0.793	0.2	NaN	ALAS1
Myo-inositol Biosynthesis	0.793	0.2	NaN	INPP5F
Neurotrophin/TRK Signaling	0.788	0.0595	2.236	RAP1B,RAF1,JUN,MAP2K1,RAP1A
Mechanisms of Viral Exit from Host Cells	0.78	0.0732	NaN	CHMP2B,ACTG1,LMNB1
Type II Diabetes Mellitus Signaling	0.78	0.0516	1.134	PPARG,IKBKB,SOCS3,CD36,MAP3K1,PKM,TNFRSF1B,NFKB1
Activation of IRF by Cytosolic Pattern Recognition Receptors	0.767	0.0635	1	TANK,IKBKB,JUN,NFKB1
Intrinsic Prothrombin Activation Pathway	0.757	0.0714	NaN	F5,F13A1,THBD
tRNA Splicing	0.757	0.0714	NaN	SMPDL3A,PDE2A,SMPDL3B
FcÎ³RIIB Signaling in B Lymphocytes	0.745	0.0575	1	RAP1B,LYN,DOK1,FCGR2B,RAP1A
Estrogen-Dependent Breast Cancer Signaling	0.745	0.0575	2.236	RAP1B,JUN,NFKB1,STAT5B,RAP1A
Role of Hypercytokinemia/hyperchemokinemia in the Pathogenesis of Influenza	0.735	0.0698	NaN	CCR1,IL36G,IL1B
Differential Regulation of Cytokine Production in Intestinal Epithelial Cells by IL-17A and IL-17F	0.728	0.087	NaN	LCN2,IL1B
Pyrimidine Deoxyribonucleotides De Novo Biosynthesis I	0.728	0.087	NaN	RRM2,CMPK1
SAPK/JNK Signaling	0.724	0.0536	1.633	RAP1B,RAC2,JUN,MAP3K1,FCER1G,RAP1A
Proline Biosynthesis II (from Arginine)	0.721	0.167	NaN	PADI4
Ceramide Degradation	0.721	0.167	NaN	ACER3
Zymosterol Biosynthesis	0.721	0.167	NaN	LBR
Rapoport-Luebering Glycolytic Shunt	0.721	0.167	NaN	PGAM1
Lactose Degradation III	0.721	0.167	NaN	PSAP
GDP-mannose Biosynthesis	0.721	0.167	NaN	GPI
Role of RIG1-like Receptors in Antiviral Innate Immunity	0.717	0.0682	NaN	TANK,IKBKB,NFKB1
Amyotrophic Lateral Sclerosis Signaling	0.712	0.0531	-1.633	CAPN1,GPX1,CAT,BAX,BCL2,GRINA
Tumoricidal Function of Hepatic Natural Killer Cells	0.701	0.0833	NaN	BAX,ITGAL
Th17 Activation Pathway	0.69	0.0549	2.236	SOCS3,IL6R,FCER1G,IL1B,NFKB1
UVB-Induced MAPK Signaling	0.686	0.0588	0	JUN,BAD,MAPK13,MAP2K1
P2Y Purigenic Receptor Signaling Pathway	0.682	0.05	2.646	RAP1B,RAF1,JUN,NFKB1,MAP2K1,ADCY7,RAP1A
Factors Promoting Cardiogenesis in Vertebrates	0.678	0.0543	NaN	TGFBR2,TGFBR1,MEF2C,LRP1,TCF7L2
FGF Signaling	0.678	0.0543	0.447	RAF1,PTPN6,MAP3K1,MAPK13,MAP2K1
Ethanol Degradation IV	0.674	0.08	NaN	CAT,ACSS1
Lymphotoxin Î² Receptor Signaling	0.672	0.058	2	IKBKB,LTBR,NFKB1,TRAF1
NAD Biosynthesis from 2-amino-3-carboxymuconate Semialdehyde	0.664	0.143	NaN	ABL1
Thioredoxin Pathway	0.664	0.143	NaN	TXN
Pentose Phosphate Pathway (Non-oxidative Branch)	0.664	0.143	NaN	TKT
Aspartate Degradation II	0.664	0.143	NaN	MDH2
IL-9 Signaling	0.66	0.0638	NaN	SOCS3,NFKB1,STAT5B
Neuroprotective Role of THOP1 in Alzheimer's Disease	0.635	0.05	NaN	HLA-A,PRTN3,HTRA2,HLA-E,ACE,MMP9
IL-4 Signaling	0.629	0.0521	NaN	RAP1B,PTPN6,INPP5F,HLA-A,RAP1A
Autoimmune Thyroid Disease Signaling	0.625	0.0612	NaN	HLA-A,FCER1G,HLA-E
Wnt/Î²-catenin Signaling	0.616	0.0465	0.707	TGFBR2,TGFBR1,JUN,RARA,CSNK1A1,SOX13,LRP1,TCF7L2
Sphingosine and Sphingosine-1-phosphate Metabolism	0.613	0.125	NaN	ACER3
Superoxide Radicals Degradation	0.613	0.125	NaN	CAT
Tryptophan Degradation to 2-amino-3-carboxymuconate Semialdehyde	0.613	0.125	NaN	HAAO
Salvage Pathways of Pyrimidine Deoxyribonucleotides	0.613	0.125	NaN	TK1
GÎ±i Signaling	0.613	0.0492	-0.816	RAP1B,RAF1,LTB4R,CXCR2,RAP1A,ADCY7
Primary Immunodeficiency Signaling	0.607	0.06	NaN	PTPRC,TNFRSF13B,CD3D
Endothelin-1 Signaling	0.606	0.0452	1	RAP1B,PLD4,RAF1,JUN,PTGS1,MAPK13,ADCY7,PLA2G7,RAP1A
IL-15 Production	0.602	0.0714	NaN	PTK2B,NFKB1
Amyloid Processing	0.592	0.0588	NaN	CAPN1,CSNK1A1,MAPK13
CTLA4 Signaling in Cytotoxic T Lymphocytes	0.572	0.0495	NaN	B2M,PTPN6,HLA-A,FCER1G,CD3D
Pathogenesis of Multiple Sclerosis	0.569	0.111	NaN	CCR1
Prostanoid Biosynthesis	0.569	0.111	NaN	PTGS1
Sucrose Degradation V (Mammalian)	0.569	0.111	NaN	ALDOA
Heme Biosynthesis II	0.569	0.111	NaN	ALAS1
Sperm Motility	0.554	0.0469	1	SLC16A10,PDE2A,Calm1 (includes others),PTK2B,SLC12A2,PLA2G7
Transcriptional Regulatory Network in Embryonic Stem Cells	0.547	0.0556	NaN	HIST1H4A,L1CAM,SKIL
Calcium Transport I	0.53	0.1	NaN	ATP2A3
GDP-glucose Biosynthesis	0.53	0.1	NaN	HK3
Role of BRCA1 in DNA Damage Response	0.529	0.05	1	RBL2,CDKN1A,PLK1,E2F2
ErbB4 Signaling	0.529	0.05	2	RAP1B,RAF1,RAP1A,MAP2K1
Cellular Effects of Sildenafil (Viagra)	0.527	0.0458	NaN	PDE2A,Calm1 (includes others),MYL6,ACTG1,ADCY7,MYL12A
Glutamate Receptor Signaling	0.504	0.0526	NaN	Calm1 (includes others),SLC38A1,GRINA
Circadian Rhythm Signaling	0.502	0.0606	NaN	BHLHE40,GRINA
Adipogenesis pathway	0.502	0.0448	NaN	PPARG,AGPAT2,XBP1,CEBPD,FABP4,STAT5B
Estrogen Receptor Signaling	0.502	0.0448	NaN	RAP1B,RAF1,DDX5,MAP2K1,RAP1A,NCOA3
Glucose and Glucose-1-phosphate Degradation	0.495	0.0909	NaN	HK3
Oxidative Phosphorylation	0.492	0.0459	-2.236	ATP5MC1,Cox6c,NDUFV3,NDUFB8,ATP5PB
CCR3 Signaling in Eosinophils	0.478	0.0438	1.342	RAP1B,RAF1,Calm1 (includes others),MAPK13,MAP2K1,RAP1A
Allograft Rejection Signaling	0.465	0.0465	NaN	B2M,HLA-A,FCER1G,HLA-E
Cleavage and Polyadenylation of Pre-mRNA	0.465	0.0833	NaN	PAPOLA
Assembly of RNA Polymerase I Complex	0.465	0.0833	NaN	POLR1D
Guanosine Nucleotides Degradation III	0.465	0.0833	NaN	GDA
BER pathway	0.465	0.0833	NaN	PNKP
Role of Pattern Recognition Receptors in Recognition of Bacteria and Viruses	0.462	0.0432	0.447	C3,C5AR1,TLR7,OSM,IL1B,NFKB1
p53 Signaling	0.457	0.0442	0.447	JUN,CDKN1A,BAX,BIRC5,BCL2
Apelin Cardiomyocyte Signaling Pathway	0.44	0.0435	-0.447	MYL6,CAT,ATP2A3,MAPK13,MYL12A
Choline Biosynthesis III	0.437	0.0769	NaN	PLD4
Cholesterol Biosynthesis I	0.437	0.0769	NaN	LBR
Glycogen Degradation II	0.437	0.0769	NaN	PYGL
Bile Acid Biosynthesis, Neutral Pathway	0.437	0.0769	NaN	CYP27A1
Cholesterol Biosynthesis II (via 24,25-dihydrolanosterol)	0.437	0.0769	NaN	LBR
Cholesterol Biosynthesis III (via Desmosterol)	0.437	0.0769	NaN	LBR
Glioblastoma Multiforme Signaling	0.433	0.0412	0.816	RAP1B,RAF1,CDKN1A,CDKN1B,MAP2K1,RAP1A,E2F2
Notch Signaling	0.423	0.0526	NaN	NOTCH2,HES1
DNA Double-Strand Break Repair by Homologous Recombination	0.411	0.0714	NaN	ABL1
Colanic Acid Building Blocks Biosynthesis	0.411	0.0714	NaN	GPI
Aldosterone Signaling in Epithelial Cells	0.407	0.0402	2	HSPA8,RAF1,DUSP1,SGK1,SLC12A2,HSPA1A/HSPA1B,MAP2K1
eNOS Signaling	0.407	0.0402	0	HSPA8,CCNA2,LPAR6,Calm1 (includes others),Hspa1b,HSPA1A/HSPA1B,ADCY7
Glycogen Degradation III	0.388	0.0667	NaN	PYGL
Role of PKR in Interferon Induction and Antiviral Response	0.383	0.0488	NaN	IKBKB,NFKB1
VEGF Family Ligand-Receptor Interactions	0.375	0.0417	2	RAP1B,RAF1,RAP1A,MAP2K1
Hereditary Breast Cancer Signaling	0.372	0.0395	NaN	RAP1B,H2AFX,CDKN1A,RAP1A,CDK1,CCNB1
MIF Regulation of Innate Immunity	0.371	0.0476	NaN	JUN,NFKB1
Granzyme B Signaling	0.368	0.0625	NaN	LMNB1
Chondroitin Sulfate Degradation (Metazoa)	0.368	0.0625	NaN	GM2A
Parkinson's Signaling	0.368	0.0625	NaN	MAPK13
Sphingosine-1-phosphate Signaling	0.359	0.0397	0	S1PR4,ACER3,PTK2B,S1PR5,ADCY7
Dermatan Sulfate Degradation (Metazoa)	0.348	0.0588	NaN	GM2A
D-myo-inositol (1,4,5)-trisphosphate Degradation	0.348	0.0588	NaN	INPP5F
TR/RXR Activation	0.345	0.04	NaN	HP,UCP2,SCARB1,NCOA3
Melatonin Signaling	0.344	0.0417	NaN	RAF1,Calm1 (includes others),MAP2K1
Ephrin B Signaling	0.344	0.0417	NaN	RAC2,ABI1,CXCR4
Role of NANOG in Mammalian Embryonic Stem Cell Pluripotency	0.333	0.0385	2.236	RAP1B,LIFR,RAF1,MAP2K1,RAP1A
Differential Regulation of Cytokine Production in Macrophages and T Helper Cells by IL-17A and IL-17F	0.33	0.0556	NaN	IL1B
1D-myo-inositol Hexakisphosphate Biosynthesis II (Mammalian)	0.33	0.0556	NaN	INPP5F
D-myo-inositol (1,3,4)-trisphosphate Biosynthesis	0.33	0.0556	NaN	INPP5F
AMPK Signaling	0.317	0.0365	-0.707	CCNA2,RAB27A,EEF2,CDKN1A,RAB8A,MAPK13,RAB6A,ADRB2
Purine Nucleotides Degradation II (Aerobic)	0.313	0.0526	NaN	GDA
Dopamine-DARPP32 Feedback in cAMP Signaling	0.308	0.0368	1.342	Calm1 (includes others),PPP3R1,CSNK1A1,ATP2A3,ADCY7,GRINA
Role of Wnt/GSK-3Î² Signaling in the Pathogenesis of Influenza	0.304	0.039	NaN	CSNK1A1,TCF7L2,NCOA3
Cardiomyocyte Differentiation via BMP Receptors	0.298	0.05	NaN	MEF2C
Granzyme A Signaling	0.298	0.05	NaN	HMGB2
The Visual Cycle	0.298	0.05	NaN	DHRS3
Hematopoiesis from Pluripotent Stem Cells	0.296	0.0408	NaN	FCER1G,CD3D
Maturity Onset Diabetes of Young (MODY) Signaling	0.283	0.0476	NaN	GAPDH
Oxidative Ethanol Degradation III	0.283	0.0476	NaN	ACSS1
Endoplasmic Reticulum Stress Pathway	0.283	0.0476	NaN	XBP1
Cardiac Î²-adrenergic Signaling	0.276	0.0357	0.447	SMPDL3A,PDE2A,ATP2A3,SMPDL3B,ADCY7
UVA-Induced MAPK Signaling	0.261	0.0354	NaN	RAP1B,JUN,MAPK13,RAP1A
Semaphorin Signaling in Neurons	0.26	0.0377	NaN	ITGB1,SEMA4D
Superpathway of D-myo-inositol (1,4,5)-trisphosphate Metabolism	0.257	0.0435	NaN	INPP5F
Putrescine Degradation III	0.257	0.0435	NaN	SAT1
Role of Cytokines in Mediating Communication between Immune Cells	0.253	0.037	NaN	IL36G,IL1B
Triacylglycerol Degradation	0.253	0.037	NaN	ABHD12,PRDX6
Human Embryonic Stem Cell Pluripotency	0.251	0.0345	NaN	TGFBR2,S1PR4,TGFBR1,S1PR5,TCF7L2
Nitric Oxide Signaling in the Cardiovascular System	0.25	0.0348	2	PDE2A,Calm1 (includes others),ATP2A3,MAP2K1
TCA Cycle II (Eukaryotic)	0.245	0.0417	NaN	MDH2
Growth Hormone Signaling	0.243	0.0349	NaN	SOCS3,PTPN6,STAT5B
Cell Cycle Control of Chromosomal Replication	0.237	0.0357	NaN	TOP2A,CDK1
Tryptophan Degradation III (Eukaryotic)	0.234	0.04	NaN	HAAO
NAD Salvage Pathway II	0.223	0.0385	NaN	Acp5
D-myo-inositol (1,4,5)-Trisphosphate Biosynthesis	0.213	0.037	NaN	PLD4
Superpathway of Cholesterol Biosynthesis	0.204	0.0357	NaN	LBR
Synaptic Long Term Depression	0	0.0323	2.449	RAP1B,RAF1,LYN,PLA2G7,MAP2K1,RAP1A
PXR/RXR Activation	0	0.0154	NaN	ALAS1
Neuropathic Pain Signaling In Dorsal Horn Neurons	0	0.00855	NaN	GRINA
Cell Cycle Regulation by BTG Family Proteins	0	0.027	NaN	E2F2
DNA Methylation and Transcriptional Repression Signaling	0	0.0294	NaN	HIST1H4A
Androgen Signaling	0	0.0221	NaN	JUN,Calm1 (includes others),NFKB1
Role of Oct4 in Mammalian Embryonic Stem Cell Pluripotency	0	0.0217	NaN	RARA
CREB Signaling in Neurons	0	0.0274	2.449	RAP1B,RAF1,Calm1 (includes others),MAP2K1,RAP1A,ADCY7
Basal Cell Carcinoma Signaling	0	0.0139	NaN	TCF7L2
G Beta Gamma Signaling	0	0.0252	NaN	RAP1B,RAF1,RAP1A
G Protein Signaling Mediated by Tubby	0	0.0323	NaN	ABL1
Retinoic acid Mediated Apoptosis Signaling	0	0.0161	NaN	RARA
Leptin Signaling in Obesity	0	0.0341	NaN	SOCS3,ADCY7,MAP2K1
Role of PI3K/AKT Signaling in the Pathogenesis of Influenza	0	0.025	NaN	NFKB1,MAP2K1
MSP-RON Signaling Pathway	0	0.027	NaN	ITGB2,ACTG1
MIF-mediated Glucocorticoid Regulation	0	0.0294	NaN	NFKB1
nNOS Signaling in Skeletal Muscle Cells	0	0.0244	NaN	Calm1 (includes others)
Netrin Signaling	0	0.0308	NaN	RAC2,PPP3R1
Heparan Sulfate Biosynthesis	0	0.012	NaN	PRDX6
Retinoate Biosynthesis I	0	0.0294	NaN	DHRS3
Heparan Sulfate Biosynthesis (Late Stages)	0	0.0132	NaN	PRDX6
Pyrimidine Ribonucleotides De Novo Biosynthesis	0	0.0217	NaN	CMPK1
Phospholipases	0	0.0317	NaN	PLD4,PLA2G7
Dermatan Sulfate Biosynthesis	0	0.0169	NaN	DSE
Dermatan Sulfate Biosynthesis (Late Stages)	0	0.0217	NaN	DSE
Retinol Biosynthesis	0	0.0238	NaN	DHRS3
Pyrimidine Ribonucleotides Interconversion	0	0.0227	NaN	CMPK1
Stearate Biosynthesis I (Animals)	0	0.0227	NaN	MBOAT7
Ethanol Degradation II	0	0.0294	NaN	ACSS1
HIPPO signaling	0	0.0235	NaN	YWHAG,YWHAZ
PCP pathway	0	0.0164	NaN	JUN
Wnt/Ca+ pathway	0	0.0161	NaN	NFKB1
Protein Ubiquitination Pathway	0	0.0258	NaN	HSPA8,B2M,HLA-A,USP16,HSPA1A/HSPA1B,USP39,UBE2C
GABA Receptor Signaling	0	0.0211	NaN	GABARAP,ADCY7
Serotonin Receptor Signaling	0	0.0233	NaN	ADCY7
Phototransduction Pathway	0	0.0189	NaN	GNGT2
Dopamine Receptor Signaling	0	0.013	NaN	ADCY7
Hypoxia Signaling in the Cardiovascular System	0	0.027	NaN	JUN,UBE2C
GPCR-Mediated Integration of Enteroendocrine Signaling Exemplified by an L Cell	0	0.0274	NaN	ADCY7,ADRB2
GPCR-Mediated Nutrient Sensing in Enteroendocrine Cells	0	0.0179	NaN	ADCY7,FFAR2
Gustation Pathway	0	0.0325	NaN	SMPDL3A,LPAR6,PDE2A,SMPDL3B,ADCY7
Sumoylation Pathway	0	0.0312	NaN	JUN,NFKB1,ARHGDIB
GP6 Signaling Pathway	0	0.0296	2	RAP1B,Calm1 (includes others),FCER1G,LYN
NER Pathway	0	0.0194	NaN	HIST1H4A,TOP2A
Apelin Pancreas Signaling Pathway	0	0.0169	NaN	NFKB1

## Sheet: C2,4 vs C0,1,3,5
Supplementary Table 6e: Ingenuity Pathway Analysis of Cluster 2 and 4 Macrophages compared to non Cluster 2 and 4 Macrophages
Ingenuity Canonical Pathways	-log(p-value)	Ratio	z-score	Molecules
EIF2 Signaling	49.1	0.463	6.26	RAP2B,EIF3C,RPL39,RPLP2,RPL35A,EIF2A,RPS11,RPS2,EIF1AY,PABPC1,RAP1A,RPL10A,RPS6,PTBP1,ACTA2,PPP1R15A,RPL10,RPL6,RPS25,RPL41,EIF3K,RAP1B,RPL24,Rpl36a,RPS18,Rpl22l1,RPL26,EIF2B2,RPL7,EIF4E,RPL35,RPS9,EIF3A,RPS12,RPS5,RPL31,RPL18,RPS24,RPS19,RPL4,EIF3H,RPL17,RPS10,EIF3G,RPS16,EIF4A1,EIF2B1,RPS27A,RPL37,EIF1AX,RPS14,RPL11,RPL22,RPS23,HSPA5,RPS7,RPL13,RPS20,EIF3D,RPS13,RPL21,RPL19,PPP1CA,ATF3,RPL36AL,…
Mitochondrial Dysfunction	36.6	0.462	NaN	NDUFA9,ATP5F1D,NDUFB5,COX8A,ACO2,ATP5MG,NCSTN,NDUFB8,NDUFA1,NDUFB3,NDUFB10,VDAC2,PDHA1,NDUFA5,NDUFS6,NDUFA10,UQCRFS1,HTRA2,ATP5PB,ATP5MC3,ATP5PF,ATP5MC2,NDUFS7,ATP5F1A,ATP5PO,UQCR11,SDHC,GSR,ATP5F1C,PRDX3,NDUFB11,ATP5F1B,NDUFA6,APH1A,TXN2,UQCRC2,NDUFA12,NDUFS3,NDUFB2,HSD17B10,NDUFA4,ATP5MC1,SDHB,COX7B,ATP5PD,Cox6c,COX6A1,PRDX5,NDUFA2,NDUFB9,PARK7,ATP5MF,NDUFB6,NDUFS2,OGDH,CASP8,NDUFAB1,COX4I1,SDH…
Oxidative Phosphorylation	34.5	0.56	7.81	NDUFA9,ATP5F1D,NDUFB5,COX8A,ATP5MG,NDUFB8,NDUFA1,NDUFB3,NDUFB10,NDUFA5,NDUFS6,UQCRFS1,NDUFA10,ATP5PB,ATP5MC3,ATP5PF,ATP5MC2,NDUFS7,ATP5F1A,ATP5PO,UQCR11,SDHC,ATP5F1C,NDUFB11,ATP5F1B,NDUFA6,UQCRC2,NDUFA12,NDUFS3,NDUFB2,NDUFA4,COX7B,SDHB,ATP5MC1,ATP5PD,Cox6c,COX6A1,NDUFA2,NDUFB9,ATP5MF,NDUFS2,NDUFB6,NDUFAB1,COX4I1,SDHA,NDUFV1,COX6B1,COX7A2L,NDUFA13,UQCRB,NDUFV2,NDUFS8,UQCR10,CYC1,COX7A2,COX5A,SDHD,…
Regulation of eIF4 and p70S6K Signaling	22.1	0.37	2.646	RAP2B,EIF3C,RPS23,MAPK13,RPS11,EIF2A,RPS7,RPS20,EIF3D,RPS13,RPS2,EIF1AY,ITGA4,PABPC1,RPS8,EIF2S3,EIF3E,RAP1A,EIF2S2,EIF3M,RPS6,EIF4A3,RPS15A,RPS25,RPSA,EIF3K,RAP1B,RPS18,EIF2S1,EIF2B2,EIF4E,RPS28,RPS9,EIF3A,RPS17,RPS3,RPS5,RPS12,MAP2K1,RPS24,ITGB1,RPS19,EIF3H,RPS10,RPS21,RPS29,FAU,EIF3G,RPS4Y1,RPS15,EIF3F,RPS16,RPS26,EIF4A1,RPS27L,EIF2B1,EIF3I,RPS27A,EIF3L,EIF1AX,RPS14
Sirtuin Signaling Pathway	19.8	0.277	-3.286	TUBA1B,POLR2F,TIMM13,NDUFA9,ATP5F1D,NDUFB5,TIMM50,ARG2,NDUFB8,NDUFA1,NDUFB3,VDAC2,NDUFB10,PDHA1,NDUFA5,XPC,NDUFS6,NDUFA10,UQCRFS1,ATP5PB,APEX1,ATP5PF,TP53,TIMM44,NDUFS7,HSF1,ATP5F1A,SDHC,NFKB2,TIMM17A,ATP5F1C,ACADL,NDUFB11,ATP5F1B,NDUFA6,TOMM34,UQCRC2,NDUFA12,IDH2,H1F0,NDUFS3,NDUFB2,TOMM40,NDUFA4,HIST1H1C,ATP5MC1,SDHB,NFKB1,NDUFA2,NDUFB9,JUN,GADD45A,TUBA8,NDUFB6,NDUFS2,GOT2,NDUFAB1,PPARG,POLR1D,S…
Protein Ubiquitination Pathway	17.7	0.273	NaN	FZR1,HSPA14,UBE2A,USP5,PSMA7,HSPA1A/HSPA1B,TRAP1,PSMB8,DNAJC15,HSPA5,PSMC5,USP8,HSPA4,UBE2B,PSMA2,PSMC2,PSMA6,PSMB5,DNAJC19,HSPA9,PSMC4,PSME2,PSMD5,PSMD6,PSMD3,HSPA8,UBE2G2,PSMD11,PSMB7,UBE2L3,PSMB2,PSMA5,PSMD12,PSMB1,PSMA4,ANAPC5,PSMD4,UBE2E1,UBE2I,B2M,PSMB3,ANAPC2,CDC20,PSMD7,HLA-A,PSMB10,UBE2N,CUL1,UBE2F,HSP90B1,HSP90AB1,STUB1,PSMC6,UBE2V1,HSPE1,PSMA3,PSMD14,PSMB4,PSMB9,PSMD13,PSMA1,HSPD1,PSMB…
mTOR Signaling	13.9	0.274	3.207	RAP2B,EIF3C,RPS23,RPS11,RPS7,RPS20,EIF3D,RPS13,RPS2,EIF4B,RHEB,RPS8,EIF3E,MLST8,RAP1A,EIF3M,RPS6,RND3,EIF4A3,PRKCD,RPS25,RPS15A,EIF3K,RPSA,RAP1B,RPS18,FKBP1A,EIF4E,RPS28,HMOX1,RPS9,EIF3A,RPS17,RPS3,RPS5,RPS12,RPS24,RPS19,EIF3H,RPS10,RPS21,RPS29,FAU,EIF3G,PLD4,EIF3F,RPS15,RPS4Y1,RPS16,RPS26,EIF4A1,RPS27L,EIF3I,RPS27A,RPS6KA4,EIF3L,RPS14
Antigen Presentation Pathway	9.05	0.474	NaN	B2M,PSMB9,CALR,PSMB5,PDIA3,HLA-A,HLA-DQA1,CANX,PSMB8,HLA-DQB1,CD74,PSMB6,HLA-G,HLA-DMA,HLA-DMB,TAPBP,HLA-E,HLA-DRB5
Unfolded protein response	8.98	0.393	NaN	PPARG,CALR,P4HB,HSPA14,INSIG1,Hspa1b,HSPA9,HSPA1A/HSPA1B,XBP1,CEBPD,CANX,HSPA5,EIF2A,CEBPE,HSPA8,HSPA4,HSP90B1,PDIA6,MBTPS1,PPP1R15A,VCP,DNAJA2
TCA Cycle II (Eukaryotic)	8.71	0.583	3.742	SDHA,SDHB,IDH3G,ACO2,SDHC,MDH1,SUCLA2,CS,SUCLG1,SDHD,IDH3A,OGDH,FH,IDH3B
Phagosome Maturation	8.61	0.257	NaN	B2M,TUBA1B,ATP6V0B,PRDX1,ATP6V1C1,HLA-A,PRDX5,TUBB,CTSV,CTSZ,CTSD,NSF,TUBA8,CTSH,CTSS,LAMP1,NAPA,M6PR,CALR,VPS16,VPS41,TUBB2A,CANX,ATP6V1A,TSG101,GPAA1,LAMP2,CTSA,TUBA1A,ATP6V1H,TUBB6,ATP6V1F,CTSB,GOSR2,CTSC,ATP6V1B2,HLA-DRB5,PRDX2
Huntington's Disease Signaling	6.23	0.19	-1	POLR2F,SDHB,ATP5MC1,POLR2D,HSPA14,ATP5F1D,SGK1,Hspa1b,HSPA1A/HSPA1B,POLR2J,HSPA5,HSPA4,CASP6,NSF,CTSD,POLR2C,JUN,CASP1,TCERG1,CASP8,NAPA,ATP5PB,ATP5PF,SDHA,TP53,HDAC4,ATP5F1A,HDAC1,HSPA9,PSME2,BAX,GPAA1,GNG10,HSPA8,ATP5F1C,BCL2L1,PSME1,HDAC3,ATP5F1B,POLR2E,CAPN1,PRKCD,CLTA,RPS27A,CYCS,CAPN2,GOSR2,UBC
IL-10 Signaling	5.73	0.29	NaN	CCR1,SOCS3,BLVRA,TYK2,BLVRB,ARG2,MAPK13,NFKB2,NFKB1,IL18RAP,IL1R2,IKBKB,HMOX1,IL36G,JUN,IL1RN,IL10RA,CD14,LBP,NFKBIB
Sumoylation Pathway	5.47	0.25	0	TP53,SUMO3,GDI1,HDAC1,RAN,GDI2,RPA1,NFKB2,RFC5,NFKB1,UBA2,ARHGDIB,DAXX,RNF4,PCNA,JUN,SAE1,RND3,STUB1,SUMO1,RANGAP1,SUMO2,ARHGDIA,UBE2I
PI3K/AKT Signaling	4.98	0.217	3.78	RAP1B,RAP2B,YWHAH,NFKB1,EIF4E,YWHAQ,IKBKB,HSP90B1,GYS1,HSP90AB1,NFKBIB,MAP2K1,ITGA4,TP53,ITGB1,CDC37,RHEB,YWHAG,YWHAE,YWHAB,TYK2,YWHAZ,NFKB2,RAP1A,BCL2L1,INPP5F,CDKN1A,MAP3K8
NRF2-mediated Oxidative Stress Response	4.94	0.188	3.128	RAP2B,RAP1B,GSTM5,PRDX1,PPIB,DNAJC15,MAFG,HMOX1,AKR1A1,JUN,SCARB1,VCP,PMF1/PMF1-BGLAP,DNAJA3,DNAJA2,TXN,MAP2K1,MGST1,MAP3K1,DNAJC19,JUNB,SOD1,RAP1A,GSTO1,DNAJC11,GSR,FTL,ERP29,MGST2,ACTA2,STIP1,PRKCD,DNAJB11,CAT,CCT7,GSTP1,MGST3,DNAJC7
Apoptosis Signaling	4.94	0.24	-0.209	RAP2B,RAP1B,TP53,NAIP,LMNA,BAX,NFKB2,NFKB1,RAP1A,PARP1,IKBKB,BCL2L1,CASP6,CAPN1,PLCG2,HTRA2,CYCS,CAPN2,TNFRSF1B,BCL2A1,NFKBIB,CASP8,MAP2K1
Fatty Acid Î²-oxidation I	4.92	0.375	2.309	HSD17B10,ECHS1,ACAA1,ECI2,ACSL5,HADHB,HSD17B4,ECI1,ACAA2,ACSL1,HADH,SLC27A4
Iron homeostasis signaling pathway	4.91	0.212	NaN	ATP6V0B,ATP6V1C1,ACO2,CUL1,CIAO2A,HMOX1,MCOLN1,SLC11A2,SLC40A1,FBXL5,STAT5B,CIAO2B,NUBP1,IL6R,TYK2,HSPA9,ATP6V1A,LYRM4,HMOX2,FTL,HP,TF,ATP6V1H,ATP6V1F,NUBP2,HFE,SLC11A1,LRP1,ATP6V1B2
Induction of Apoptosis by HIV1	4.71	0.279	3.153	TP53,NAIP,SLC25A4,SLC25A3,BAX,NFKB2,NFKB1,BCL2L1,DAXX,TRADD,IKBKB,HTRA2,CYCS,TNFRSF1B,SLC25A5,NFKBIB,CASP8
Inflammasome pathway	4.57	0.45	2.333	NAIP,NLRP3,PYCARD,CTSB,CASP1,NFKB2,NFKB1,CASP8,P2RX7
Heme Degradation	4.17	1	2	HMOX1,BLVRA,BLVRB,HMOX2
Cell Cycle: G2/M DNA Damage Checkpoint Regulation	4.12	0.286	0.302	YWHAQ,TP53,YWHAG,YWHAE,YWHAH,GADD45A,YWHAB,CUL1,CDKN1A,CKS1B,YWHAZ,CCNB2,FBXL5,CCNB1
tRNA Charging	3.95	0.308	3.464	NARS,WARS,TARS2,RARS,GARS,CARS2,KARS,Qars,TARS,SARS,VARS,FARSA
Type I Diabetes Mellitus Signaling	3.88	0.207	1.941	SOCS3,ICA1,HLA-A,HLA-DQA1,IFNGR1,MAPK13,NFKB2,HSPD1,HLA-DQB1,NFKB1,CD3D,HLA-G,IKBKB,TRADD,HLA-DMA,HLA-DMB,FCER1G,CYCS,TNFRSF1B,NFKBIB,CASP8,HLA-E,HLA-DRB5
Caveolar-mediated Endocytosis Signaling	3.81	0.239	NaN	ITGB1,B2M,COPZ1,ARCN1,HLA-A,COPA,COPE,CD48,FLOT1,ITGB7,COPG1,CD55,ITGAM,FLOT2,ACTA2,ITGAX,ITGA4
BER pathway	3.5	0.5	NaN	PCNA,PNKP,FEN1,APEX1,PARP1,POLB
Systemic Lupus Erythematosus Signaling	3.45	0.161	NaN	RAP2B,RAP1B,HLA-A,ZMAT5,TXNL4A,HNRNPA2B1,FCGR1A,LSM2,HLA-G,IL36G,JUN,EFTUD2,TLR7,SNRPD1,LSM3,SNRPD3,SNRPD2,FCGR3A/FCGR3B,LSM4,TNFSF13B,SNRPA1,SNRNP40,SNRPB,SNRPF,IL6R,RAP1A,CD3D,PPIH,CD40,IL1RN,CD72,SNRNP25,PLCG2,SNRPB2,FCER1G,LYN,LSM7,HLA-E
Toll-like Receptor Signaling	3.43	0.224	0.577	ECSIT,TICAM2,MAP3K1,MAPK13,NFKB2,NFKB1,IKBKB,IL36G,LY96,JUN,IL1RN,TLR7,CD14,RPS27A,LBP,TIRAP,UBC
Altered T Cell and B Cell Signaling in Rheumatoid Arthritis	3.42	0.211	NaN	HLA-A,RELB,HLA-DQA1,LTB,NFKB2,HLA-DQB1,NFKB1,IL36G,CD40,HLA-DMA,IL1RN,PRTN3,TNFSF13,HLA-DMB,TLR7,FCER1G,TNFRSF13B,TNFSF13B,HLA-DRB5
TNFR1 Signaling	3.41	0.26	2.496	MAP4K2,NAIP,MAP3K1,NFKB2,NFKB1,IKBKB,TRADD,CASP6,JUN,MADD,CYCS,NFKBIB,CASP8
LXR/RXR Activation	3.31	0.19	1.789	APOE,ECHS1,C3,MSR1,CD36,ARG2,APOC2,NFKB2,PCYOX1,NFKB1,IL18RAP,IL1R2,LY96,IL36G,TF,IL1RN,CD14,S100A8,LBP,PLTP,TNFRSF1B,MMP9,HADH
iNOS Signaling	3.3	0.267	1.897	IKBKB,LY96,JUN,Calm1 (includes others),TYK2,CD14,IFNGR1,NFKB2,MAPK13,LBP,NFKB1,NFKBIB
Hypoxia Signaling in the Cardiovascular System	3.09	0.216	NaN	TP53,P4HB,UBE2A,UBE2N,UBE2F,UBE2G2,UBE2L3,HSP90B1,JUN,HSP90AB1,UBE2B,SUMO1,UBE2V1,NFKBIB,UBE2E1,UBE2I
Proline Biosynthesis II (from Arginine)	3.06	0.667	1	PYCR3,PADI4,OAT,PYCR2
Arginine Degradation VI (Arginase 2 Pathway)	3.06	0.667	1	PYCR3,OAT,ARG2,PYCR2
GADD45 Signaling	3.03	0.368	NaN	TP53,PCNA,GADD45A,CCND3,CDKN1A,CDK4,CCNB1
Interferon Signaling	2.99	0.278	3.162	IFITM3,OAS1,TYK2,IFNGR1,IFI35,BAX,PSMB8,IFNAR2,IFITM2,IFNAR1
Glucocorticoid Receptor Signaling	2.91	0.141	NaN	RAP1B,RAP2B,POLR2F,ICAM1,POLR2D,YWHAH,HSPA14,POU2F2,SGK1,Hspa1b,HSPA1A/HSPA1B,POLR2J,SLPI,MAPK13,NFKB1,HSPA5,FCGR1A,PTGES3,TSC22D3,IL1R2,TGFBR2,IKBKB,HSPA4,HSP90B1,JUN,POLR2C,HSP90AB1,ANXA1,SUMO1,SMARCB1,STAT5B,NFKBIB,MAP2K1,TAF9,VCAM1,TAF6,MAP3K1,HSPA9,KRT80,TSG101,CD3D,RAP1A,HSPA8,BCL2L1,POLR2E,IL1RN,CDKN1A,FKBP4,UBE2I
Dendritic Cell Maturation	2.8	0.158	3.657	B2M,ICAM1,HLA-A,PDIA3,HLA-DQA1,LTB,CD83,HLA-DQB1,MAPK13,NFKB1,FCGR1A,IKBKB,IL36G,HLA-DMA,HLA-DMB,LY75,LTBR,NFKBIB,TNFRSF1B,FCGR3A/FCGR3B,RELB,NFKB2,STAT4,CD40,IL1RN,PLCG2,TREM2,FCER1G,IRF8,HLA-DRB5,IFNAR1
Lipid Antigen Presentation by CD1	2.8	0.308	NaN	B2M,CALR,AP2M1,AP1G2,PDIA3,FCER1G,PSAP,CANX
Dolichyl-diphosphooligosaccharide Biosynthesis	2.75	0.455	2.236	ALG3,ALG5,DPM2,DPAGT1,DPM3
Endoplasmic Reticulum Stress Pathway	2.74	0.333	NaN	CALR,HSP90B1,MBTPS1,XBP1,HSPA5,EIF2S1,TAOK3
Superpathway of Serine and Glycine Biosynthesis I	2.73	0.571	2	PSAT1,PHGDH,UBAC2,SHMT2
Glutaryl-CoA Degradation	2.71	0.375	2.449	HSD17B10,PARK7,ACAT1,HADHB,HSD17B4,HADH
Calcium-induced T Lymphocyte Apoptosis	2.69	0.212	2.309	Calm1 (includes others),HLA-DMA,HLA-A,PRKCD,HLA-DMB,HDAC1,FCER1G,NR4A1,HLA-DQA1,ATP2A3,CAPN2,HLA-DQB1,CD3D,HLA-DRB5
Aryl Hydrocarbon Receptor Signaling	2.68	0.169	-0.5	TP53,ALDH1B1,MGST1,TFDP1,GSTM5,CDK4,BAX,NFKB2,NFKB1,PTGES3,ALDH9A1,GSTO1,CCNA2,CTSD,HSP90B1,JUN,MGST2,CCND3,HSP90AB1,CDKN1A,NEDD8,GSTP1,MGST3,MCM7
NER Pathway	2.68	0.184	2	POLR2F,POLR2D,UBE2N,COPS7A,HMGN1,POLR2J,DNA2,RPA1,RFC5,POLD4,PCNA,POLR2C,POLR2E,GPS1,COPS6,NEDD8,XPC,POLD2,UBE2I
CD27 Signaling in Lymphocytes	2.63	0.226	0.632	IKBKB,BCL2L1,SIVA1,JUN,MAP3K1,MAP3K8,CYCS,NFKB2,NFKB1,NFKBIB,CASP8,MAP2K1
Acute Phase Response Signaling	2.63	0.159	1.4	ECSIT,RAP2B,RAP1B,SOCS3,FN1,MAPK13,NFKB1,HNRNPK,HMOX1,TRADD,IKBKB,IL36G,JUN,OSM,LBP,NFKBIB,TNFRSF1B,MAP2K1,C3,MAP3K1,IL6R,NFKB2,RAP1A,HMOX2,HP,FTL,TF,IL1RN
Cell Cycle: G1/S Checkpoint Regulation	2.63	0.209	1.265	TP53,RPL11,MAX,HDAC3,HDAC4,CCND3,PA2G4,TFDP1,CDKN1A,CUL1,HDAC1,CDK4,RPL5,FBXL5
TREM1 Signaling	2.58	0.2	2.324	ITGB1,TREM1,ICAM1,NLRP3,LAT2,CD83,NFKB2,NFKB1,CD40,NLRP12,PLCG2,CASP1,TLR7,STAT5B,ITGAX
Glutathione Redox Reactions II	2.56	0.75	NaN	GSR,PDIA3,GLRX
autophagy	2.55	0.213	NaN	CTSV,CTSZ,CTSD,CTSA,LAMP2,VPS16,CTSH,CTSS,VPS41,WIPI1,CTSB,LAMP1,CTSC
RAN Signaling	2.55	0.353	NaN	CSE1L,RANGAP1,RAN,KPNA2,RANBP1,IPO5
ERK5 Signaling	2.5	0.203	3.742	RAP1B,RAP2B,YWHAG,YWHAE,YWHAH,SGK1,YWHAB,MEF2A,YWHAZ,RAP1A,YWHAQ,MAP3K8,MEF2C,RPS6KA4
Graft-versus-Host Disease Signaling	2.5	0.229	NaN	HLA-G,IL36G,HLA-A,IL1RN,HLA-DMA,HLA-DMB,HLA-DQA1,FCER1G,HLA-DQB1,HLA-E,HLA-DRB5
TWEAK Signaling	2.49	0.257	1.667	NAIP,IKBKB,TRADD,CASP6,CYCS,NFKB2,NFKB1,NFKBIB,CASP8
14-3-3-mediated Signaling	2.47	0.165	3.873	RAP2B,RAP1B,TUBA1B,YWHAG,YWHAH,YWHAE,YWHAB,PDIA3,TUBB2A,YWHAZ,VIM,BAX,TUBB,RAP1A,YWHAQ,JUN,TUBA1A,TUBA8,TUBB6,PLCG2,PRKCD,PDCD6IP,MAP2K1
Death Receptor Signaling	2.41	0.183	2.183	NAIP,PARP2,LMNA,NFKB2,NFKB1,ARHGDIB,PARP1,DAXX,CASP6,TRADD,IKBKB,ACTA2,HTRA2,CYCS,TNFRSF1B,NFKBIB,CASP8
PPAR Signaling	2.4	0.178	-1.886	RAP2B,RAP1B,PPARG,NFKB2,NFKB1,RAP1A,IL18RAP,IL1R2,IKBKB,IL36G,HSP90B1,JUN,HSP90AB1,IL1RN,TNFRSF1B,NFKBIB,STAT5B,MAP2K1
Leukotriene Biosynthesis	2.38	0.385	-0.447	LTA4H,MGST2,ALOX5,MGST3,DPEP2
TNFR2 Signaling	2.37	0.267	2.121	NAIP,IKBKB,JUN,MAP3K1,NFKB2,TNFRSF1B,NFKB1,NFKBIB
T Helper Cell Differentiation	2.27	0.192	NaN	TGFBR2,STAT4,CD40,HLA-DMA,HLA-A,HLA-DMB,IL6R,IL10RA,FCER1G,HLA-DQA1,IFNGR1,HLA-DQB1,TNFRSF1B,HLA-DRB5
Tryptophan Degradation III (Eukaryotic)	2.26	0.28	2.646	HSD17B10,PARK7,HAAO,ACAT1,HADHB,HSD17B4,HADH
Production of Nitric Oxide and Reactive Oxygen Species in Macrophages	2.24	0.148	2.887	RAP1B,APOE,APOC2,ARG2,MAPK13,NFKB1,IKBKB,JUN,S100A8,PPP1CA,TNFRSF1B,NFKBIB,MAP2K1,MAP3K1,TYK2,IFNGR1,NCF4,PCYOX1,NFKB2,RAP1A,NCF1,PPP1R3D,RND3,PRKCD,PLCG2,CAT,MAP3K8,IRF8,SIRPA
Th1 Pathway	2.23	0.161	2.982	SOCS3,ICAM1,HLA-A,HAVCR2,TYK2,IL6R,HLA-DQA1,NCSTN,IFNGR1,HLA-DQB1,NFKB1,CD3D,STAT4,CD40,HLA-DMA,APH1A,HLA-DMB,IL10RA,VAV1,IFNAR1,HLA-DRB5,PSEN1
Nur77 Signaling in T Lymphocytes	2.23	0.203	NaN	Calm1 (includes others),HLA-A,HLA-DMA,HLA-DMB,HDAC1,HLA-DQA1,NR4A1,FCER1G,CYCS,HLA-DQB1,CD3D,HLA-DRB5
LPS/IL-1 Mediated Inhibition of RXR Function	2.21	0.143	-1.069	ECSIT,APOE,GSTM5,APOC2,SLC27A4,CHST15,IL1R2,IL36G,JUN,SCARB1,ACSL5,FABP5,LBP,TNFRSF1B,ALDH1B1,MGST1,MAP3K1,CHST12,GSTO1,ALDH9A1,IL18RAP,LY96,MGST2,IL1RN,CAT,CD14,PLTP,CHST13,NDST1,MGST3,GSTP1,ACSL1
Granulocyte Adhesion and Diapedesis	2.2	0.15	NaN	SELL,ICAM1,CLDN15,SDC3,MMP25,IL1R2,IL36G,CXCR2,MMP8,Ccl2,TNFRSF1B,Ccl6,ITGA4,CSF3R,ITGB1,VCAM1,C5AR1,FPR2,FPR1,Ccl9,IL18RAP,ITGAM,CLDN1,IL1RN,PECAM1,MMP9,MSN
Serine Biosynthesis	2.19	0.6	NaN	PSAT1,PHGDH,UBAC2
OX40 Signaling Pathway	2.18	0.178	0.378	B2M,HLA-A,HLA-DQA1,HLA-DQB1,NFKB2,NFKB1,CD3D,HLA-G,BCL2L1,JUN,HLA-DMA,HLA-DMB,FCER1G,NFKBIB,HLA-DRB5,HLA-E
April Mediated Signaling	2.16	0.231	1.667	IKBKB,JUN,TNFSF13,MAP3K1,TNFRSF13B,NFKB2,MAPK13,NFKB1,NFKBIB
Formaldehyde Oxidation II (Glutathione-dependent)	2.09	1	NaN	ADH5,ESD
Role of PKR in Interferon Induction and Antiviral Response	2.01	0.22	NaN	TP53,IKBKB,CYCS,NFKB2,EIF2S1,NFKB1,NFKBIB,CASP8,FCGR1A
B Cell Activating Factor Signaling	2.01	0.22	1.414	IKBKB,JUN,MAP3K1,TNFRSF13B,NFKB2,MAPK13,NFKB1,NFKBIB,TNFSF13B
Regulation of IL-2 Expression in Activated and Anergic T Lymphocytes	2	0.174	NaN	RAP2B,RAP1B,Calm1 (includes others),MAP3K1,NFKB2,NFKB1,RAP1A,CD3D,TGFBR2,IKBKB,JUN,PLCG2,VAV1,NFKBIB,MAP2K1
Hereditary Breast Cancer Signaling	2	0.151	NaN	RAP2B,RAP1B,TP53,NPM1,POLR2F,HDAC4,POLR2D,HDAC1,POLR2J,CDK4,RPA1,RFC5,RAP1A,CCNB1,POLR2C,HDAC3,GADD45A,POLR2E,SMARCB1,CDKN1A,XPC,RPS27A,UBC
NF-ÎºB Signaling	1.98	0.144	2.502	RAP2B,RAP1B,UBE2N,NFKB1,TGFBR2,IL1R2,TRADD,IKBKB,IL36G,UBE2V1,TLR7,LTBR,CASP8,NFKBIB,TNFRSF1B,TNFSF13B,RELB,HDAC1,MAP3K1,NFKB2,RAP1A,CD40,IL1RN,PLCG2,FCER1G,MAP3K8,TIRAP
Autoimmune Thyroid Disease Signaling	1.95	0.204	NaN	HLA-G,CD40,HLA-A,HLA-DMA,HLA-DMB,HLA-DQA1,FCER1G,HLA-DQB1,HLA-E,HLA-DRB5
Atherosclerosis Signaling	1.95	0.156	NaN	APOE,VCAM1,ICAM1,MSR1,CD36,APOC2,NFKB2,PCYOX1,CCR2,NFKB1,TNFRSF14,PLBD1,IL36G,CD40,IL1RN,S100A8,ALOX5,MMP9,TNFSF14,ITGA4
Extrinsic Prothrombin Activation Pathway	1.95	0.312	-1	F10,PROS1,F5,F13A1,THBD
IL-17A Signaling in Fibroblasts	1.94	0.229	NaN	IKBKB,JUN,LCN2,CEBPD,NFKB2,MAPK13,NFKB1,NFKBIB
MIF Regulation of Innate Immunity	1.94	0.214	1.667	TP53,LY96,MIF,JUN,CD14,NFKB2,CD74,NFKB1,NFKBIB
Polyamine Regulation in Colon Cancer	1.94	0.273	NaN	PPARG,PSME1,MAX,MXD1,SAT1,PSME2
Arginine Biosynthesis IV	1.92	0.5	NaN	OAT,ASS1,GLUD1
GDP-mannose Biosynthesis	1.92	0.5	NaN	GPI,GMPPA,PMM2
Chronic Myeloid Leukemia Signaling	1.89	0.159	NaN	RAP2B,RAP1B,TP53,HDAC4,TFDP1,PA2G4,HDAC1,CDK4,NFKB2,NFKB1,RAP1A,TGFBR2,IKBKB,BCL2L1,HDAC3,CDKN1A,STAT5B,MAP2K1
Pentose Phosphate Pathway	1.88	0.364	-1	PGD,TKT,PGLS,TALDO1
Cyclins and Cell Cycle Regulation	1.87	0.173	0	TP53,HDAC4,PA2G4,TFDP1,HDAC1,CUL1,CDK4,CCNB2,CCNB1,CCNA2,HDAC3,CCND3,CDKN1A,FBXL5
Role of NFAT in Regulation of the Immune Response	1.81	0.14	4.2	RAP1B,RAP2B,Calm1 (includes others),HLA-A,HLA-DQA1,CSNK1A1,HLA-DQB1,NFKB1,FCGR1A,IKBKB,JUN,HLA-DMA,HLA-DMB,NFKBIB,MAP2K1,FCGR3A/FCGR3B,MEF2A,NFKB2,RAP1A,CD3D,GNG10,RCAN1,PLCG2,FCER1G,LYN,MEF2C,HLA-DRB5
Complement System	1.8	0.216	-1.342	CD55,C5AR1,C3,ITGAM,C1QBP,CFH,C3AR1,ITGAX
Tumoricidal Function of Hepatic Natural Killer Cells	1.75	0.25	2	M6PR,CASP6,ICAM1,CYCS,BAX,CASP8
Role of JAK1, JAK2 and TYK2 in Interferon Signaling	1.75	0.25	NaN	TYK2,IFNGR1,NFKB2,NFKB1,IFNAR2,IFNAR1
Glutathione Redox Reactions I	1.75	0.25	0	GSR,MGST1,MGST2,GPX1,GSTP1,MGST3
Th1 and Th2 Activation Pathway	1.73	0.139	NaN	SOCS3,ICAM1,HLA-A,HAVCR2,HLA-DQA1,NCSTN,HLA-DQB1,NFKB1,TGFBR2,JUN,HLA-DMA,HLA-DMB,STAT5B,CCR1,IL6R,TYK2,IFNGR1,CD3D,STAT4,CD40,APH1A,IL10RA,VAV1,IFNAR1,HLA-DRB5,PSEN1
PI3K Signaling in B Lymphocytes	1.71	0.148	4.025	RAP2B,RAP1B,Calm1 (includes others),ATF3,C3,PDIA3,NFKB2,NFKB1,RAP1A,IKBKB,JUN,CD40,CD180,PLCG2,LYN,ATF6B,VAV1,PIK3AP1,NFKBIB,MAP2K1
D-myo-inositol (1,4,5,6)-Tetrakisphosphate Biosynthesis	1.7	0.146	4.146	SOCS3,MINPP1,NUDT9,MDP1,NUDT14,IGBP1,NT5C,NUDT5,SET,ATP1A1,PTPRJ,INPP5F,PTPRO,PPM1H,MTMR2,DUSP12,PPP1CA,NUDT4,PPP5C,SIRPA,DUSP16
D-myo-inositol (3,4,5,6)-tetrakisphosphate Biosynthesis	1.7	0.146	4.146	SOCS3,MINPP1,NUDT9,MDP1,NUDT14,IGBP1,NT5C,NUDT5,SET,ATP1A1,PTPRJ,INPP5F,PTPRO,PPM1H,MTMR2,DUSP12,PPP1CA,NUDT4,PPP5C,SIRPA,DUSP16
Myc Mediated Apoptosis Signaling	1.69	0.169	NaN	YWHAQ,TP53,RAP1B,RAP2B,YWHAG,YWHAE,YWHAH,YWHAB,YWHAZ,CYCS,BAX,CASP8,RAP1A
D-myo-inositol-5-phosphate Metabolism	1.69	0.142	4.379	SOCS3,MINPP1,NUDT9,MDP1,NUDT14,IGBP1,NT5C,PLD4,NUDT5,SET,ATP1A1,INPP5F,PTPRJ,PTPRO,PLCG2,PPM1H,MTMR2,DUSP12,PPP1CA,NUDT4,PPP5C,SIRPA,DUSP16
Role of JAK family kinases in IL-6-type Cytokine Signaling	1.67	0.24	NaN	SOCS3,TYK2,IL6R,OSM,MAPK13,STAT5B
CDP-diacylglycerol Biosynthesis I	1.67	0.24	-0.816	AGPAT4,TAMM41,LPCAT2,AGPAT2,CDS2,MBOAT7
Cytotoxic T Lymphocyte-mediated Apoptosis of Target Cells	1.66	0.219	1.342	B2M,CASP6,HLA-A,FCER1G,CYCS,CASP8,CD3D
4-1BB Signaling in T Lymphocytes	1.66	0.219	1.633	IKBKB,JUN,NFKB2,MAPK13,NFKB1,NFKBIB,MAP2K1
Glutathione-mediated Detoxification	1.66	0.219	1.134	MGST1,MGST2,GSTM5,GGH,GSTP1,GSTO1,MGST3
D-glucuronate Degradation I	1.64	0.667	NaN	AKR1A1,CRYL1
Hypusine Biosynthesis	1.64	0.667	NaN	EIF5A,DOHH
Communication between Innate and Adaptive Immune Cells	1.59	0.156	NaN	B2M,HLA-A,CD83,Ccl9,HLA-G,IL36G,CD40,IL1RN,TNFSF13,TLR7,FCER1G,TNFRSF13B,TNFSF13B,HLA-E,HLA-DRB5
Neuroinflammation Signaling Pathway	1.59	0.125	4.218	B2M,ICAM1,PYCARD,HLA-A,TICAM2,HLA-DQA1,NCSTN,CX3CR1,HLA-DQB1,MAPK13,NFKB1,GRINA,TGFBR2,HMOX1,IKBKB,JUN,HLA-DMA,HLA-DMB,CASP1,TLR7,CASP8,NAIP,VCAM1,NLRP3,IL6R,TYK2,IFNGR1,NFKB2,CSF1R,BIRC5,CD40,TREM2,APH1A,PLCG2,TIRAP,MMP9,HLA-DRB5,P2RX7,PSEN1
Salvage Pathways of Pyrimidine Ribonucleotides	1.56	0.155	2.84	PYCR3,NME1,APOBEC1,SGK1,NME2,CSNK1A1,CDK4,PRKX,PRKCD,UCK1,CMPK1,MAP3K8,HIPK1,ADPGK,MAP2K1
B Cell Receptor Signaling	1.55	0.134	2.746	RAP2B,RAP1B,RAC2,Calm1 (includes others),POU2F2,MAPK13,NFKB1,IKBKB,JUN,NFKBIB,MAP2K1,CFL1,EGR1,CSK,MAP3K1,NFKB2,RAP1A,BCL2L1,INPP5F,PLCG2,LYN,MEF2C,VAV1,MAP3K8,PIK3AP1,BCL2A1
Crosstalk between Dendritic Cells and Natural Killer Cells	1.54	0.157	NaN	HLA-A,LTB,CD83,NFKB2,NFKB1,HLA-G,ACTA2,CD40,TREM2,TLR7,LTBR,TNFRSF1B,HLA-E,HLA-DRB5
IL-8 Signaling	1.53	0.132	0.626	RAP1B,RAP2B,RAC2,ICAM1,NFKB1,HMOX1,IKBKB,JUN,CCND3,CXCR2,NFKBIB,MAP2K1,LASP1,VASP,VCAM1,BAX,RAP1A,CSTB,GNG10,PLD4,BCL2L1,ARRB2,ITGAM,RND3,PRKCD,MMP9,ITGAX
Granzyme A Signaling	1.53	0.25	NaN	HIST1H1C,SET,NME1,H1F0,APEX1
Inhibition of Angiogenesis by TSP1	1.52	0.206	1.134	TGFBR2,TP53,JUN,THBS1,CD36,MAPK13,MMP9
MIF-mediated Glucocorticoid Regulation	1.52	0.206	1.89	LY96,MIF,CD14,CD74,NFKB2,NFKBIB,NFKB1
Ethanol Degradation II	1.52	0.206	1.134	ADH5,ALDH1B1,AKR1A1,DHRS9,ACSS1,ALDH9A1,ACSL1
Phosphatidylglycerol Biosynthesis II (Non-plastidic)	1.51	0.222	-0.816	AGPAT4,TAMM41,LPCAT2,AGPAT2,CDS2,MBOAT7
Isoleucine Degradation I	1.49	0.286	2	HSD17B10,ECHS1,ACAT1,HADHB
Colanic Acid Building Blocks Biosynthesis	1.49	0.286	1	TSTA3,GPI,GMPPA,PMM2
CD28 Signaling in T Helper Cells	1.48	0.142	2.53	Calm1 (includes others),HLA-A,ARPC5L,CSK,MAP3K1,HLA-DQA1,NFKB2,HLA-DQB1,NFKB1,CD3D,IKBKB,JUN,HLA-DMA,HLA-DMB,FCER1G,VAV1,NFKBIB,MAP2K1,HLA-DRB5
Th2 Pathway	1.47	0.138	1.732	CCR1,SOCS3,ICAM1,HLA-A,TYK2,HLA-DQA1,NCSTN,HLA-DQB1,NFKB1,CD3D,TGFBR2,STAT4,JUN,CD40,HLA-DMA,APH1A,HLA-DMB,VAV1,STAT5B,HLA-DRB5,PSEN1
Mitotic Roles of Polo-Like Kinase	1.47	0.167	2.121	ANAPC2,FZR1,HSP90B1,CDC20,HSP90AB1,CAPN1,PTTG1,ANAPC5,CCNB2,CDC26,CCNB1
Nucleotide Excision Repair Pathway	1.46	0.2	NaN	POLR2F,POLR2D,POLR2C,POLR2E,XPC,POLR2J,RPA1
Superpathway of Cholesterol Biosynthesis	1.44	0.214	1.633	MVD,FDPS,EBP,ACAT1,HADHB,LBR
FcÎ³ Receptor-mediated Phagocytosis in Macrophages and Monocytes	1.43	0.152	1.069	RAC2,PXN,ARPC5L,FYB1,FCGR1A,PLD4,HMOX1,NCF1,ACTA2,PRKCD,LYN,VAV1,VASP,FCGR3A/FCGR3B
Virus Entry via Endocytic Pathways	1.43	0.144	NaN	RAP2B,RAP1B,ITGB1,B2M,RAC2,AP2M1,AP3M1,HLA-A,RAP1A,ITGB7,CD55,AP1G2,ACTA2,PLCG2,PRKCD,CLTA,ITGA4
p38 MAPK Signaling	1.43	0.144	0.535	TP53,TIFA,HMGN1,MEF2A,MAPK13,IL18RAP,TGFBR2,IL1R2,DAXX,TRADD,IL36G,MAX,IL1RN,MAP4K1,MEF2C,RPS6KA4,TNFRSF1B
IL-6 Signaling	1.42	0.14	1.213	RAP2B,RAP1B,SOCS3,IL6R,MAPK13,NFKB2,NFKB1,RAP1A,IL18RAP,IL1R2,IKBKB,IL36G,JUN,IL1RN,CD14,LBP,TNFRSF1B,NFKBIB,MAP2K1
T Cell Exhaustion Signaling Pathway	1.4	0.132	1.941	RAP2B,RAP1B,HLA-A,BATF,HAVCR2,TYK2,IL6R,HLA-DQA1,HLA-DQB1,IFNAR2,RAP1A,TNFRSF14,STAT4,HLA-G,TGFBR2,JUN,HLA-DMA,PLCG2,HLA-DMB,FCER1G,IL10RA,HLA-E,IFNAR1,HLA-DRB5
B Cell Development	1.4	0.194	NaN	CD40,HLA-A,HLA-DMA,HLA-DMB,HLA-DQA1,HLA-DQB1,HLA-DRB5
Folate Transformations I	1.39	0.333	NaN	MTHFS,MTHFD2,SHMT2
VEGF Signaling	1.38	0.144	0.707	RAP2B,RAP1B,PXN,YWHAE,EIF2S3,EIF2S1,EIF2B2,RAP1A,EIF2S2,BCL2L1,ACTA2,PLCG2,EIF2B1,MAP2K1,EIF1AY,EIF1AX
Pentose Phosphate Pathway (Oxidative Branch)	1.36	0.5	NaN	PGD,PGLS
Ascorbate Recycling (Cytosolic)	1.36	0.5	NaN	GLRX,GSTO1
Proline Biosynthesis I	1.36	0.5	NaN	PYCR3,PYCR2
Arginine Degradation I (Arginase Pathway)	1.36	0.5	NaN	OAT,ARG2
Acetate Conversion to Acetyl-CoA	1.36	0.5	NaN	ACSS1,ACSL1
Fatty Acid Î²-oxidation III (Unsaturated, Odd Number)	1.36	0.5	NaN	ECI2,ECI1
3-phosphoinositide Degradation	1.32	0.133	4.146	SOCS3,MINPP1,NUDT9,MDP1,NUDT14,IGBP1,NT5C,NUDT5,SET,ATP1A1,PTPRJ,INPP5F,PTPRO,PPM1H,MTMR2,DUSP12,PPP1CA,NUDT4,PPP5C,SIRPA,DUSP16
Glioma Signaling	1.31	0.139	2.121	RAP2B,RAP1B,TP53,CAMK1,Calm1 (includes others),TFDP1,PA2G4,IDH3G,CDK4,RAP1A,IDH1,PLCG2,PRKCD,CDKN1A,IDH2,MAP2K1,IDH3B
PPARÎ±/RXRÎ± Activation	1.31	0.129	-1.091	RAP2B,RAP1B,ACAA1,PDIA3,CD36,NFKB2,NFKB1,RAP1A,ADIPOR1,IL18RAP,TGFBR2,IL1R2,IKBKB,ACADL,HSP90B1,JUN,HSP90AB1,PLCG2,MEF2C,GOT2,NFKBIB,STAT5B,ADCY7,MAP2K1
Hepatic Fibrosis / Hepatic Stellate Cell Activation	1.31	0.129	NaN	VCAM1,ICAM1,FN1,MYH9,IL6R,IFNGR1,BAX,NFKB2,IFNAR2,NFKB1,IL18RAP,IL1R2,TGFBR2,LY96,ACTA2,CD40,IL10RA,EDNRA,CD14,ECE1,LBP,TNFRSF1B,MMP9,IFNAR1
Mismatch Repair in Eukaryotes	1.3	0.25	NaN	PCNA,FEN1,RPA1,RFC5
Vitamin-C Transport	1.3	0.25	NaN	TXN,GLRX,GSTO1,SLC2A3
Parkinson's Signaling	1.3	0.25	NaN	SEPT5,PARK7,CYCS,MAPK13
Role of Tissue Factor in Cancer	1.28	0.136	NaN	RAP2B,RAP1B,ITGB1,TP53,P4HB,CFL1,EGR1,PLAUR,MAPK13,RAP1A,EIF4E,F10,BCL2L1,ARRB2,PDIA6,LYN,RPS6KA4,STAT5B
FAT10 Cancer Signaling Pathway	1.28	0.174	1.414	TGFBR2,TP53,IKBKB,EEF1A1,PCNA,NFKB2,TNFRSF1B,NFKB1
Protein Kinase A Signaling	1.27	0.115	1	ANAPC2,RAP1B,HIST1H1C,Calm1 (includes others),YWHAH,AKAP8,PDIA3,TIMM50,DUSP22,NFKB1,YWHAQ,TGFBR2,GYS1,DUSP3,PTPRJ,PTPRO,PPP1CA,DUSP12,NFKBIB,APEX1,MAP2K1,VASP,SMPDL3A,KDELR1,PXN,PDE2A,YWHAG,YWHAE,YWHAB,MAP3K1,YWHAZ,PYGL,NFKB2,RAP1A,GNG10,PPP1R3D,PLCG2,PRKCD,ANAPC5,H1F0,CDC26,ADCY7,TCF7L2,SIRPA,KDELR2,DUSP16
Calcium Transport I	1.26	0.3	NaN	ATP2B1,ANXA5,ATP2A3
Regulation of Cellular Mechanics by Calpain Protease	1.25	0.159	1.414	ITGB1,RAP1B,RAP2B,CCNA2,PXN,CAPN1,CDK4,CAPN2,RAP1A,ITGA4
Role of Macrophages, Fibroblasts and Endothelial Cells in Rheumatoid Arthritis	1.24	0.118	NaN	RAP2B,RAP1B,SOCS3,FN1,Calm1 (includes others),ICAM1,PDIA3,CSNK1A1,CEBPD,LTB,NFKB1,FCGR1A,IL1R2,TRADD,IKBKB,IL36G,JUN,TLR7,OSM,LTBR,TNFRSF1B,NFKBIB,MAP2K1,TNFSF13B,FCGR3A/FCGR3B,VCAM1,MIF,C5AR1,IL6R,RAP1A,CEBPE,IL18RAP,IL16,IL1RN,PLCG2,PRKCD,LRP1,TCF7L2
Superpathway of Geranylgeranyldiphosphate Biosynthesis I (via Mevalonate)	1.21	0.235	2	FDPS,MVD,ACAT1,HADHB
Acute Myeloid Leukemia Signaling	1.21	0.141	2.53	CSF3R,RAP1B,RAP2B,IDH3G,NFKB2,NFKB1,RAP1A,CSF1R,IDH1,IDH2,STAT5B,MAP2K1,TCF7L2,IDH3B
Oncostatin M Signaling	1.18	0.175	1.89	RAP1B,RAP2B,TYK2,OSM,STAT5B,MAP2K1,RAP1A
JAK/Stat Signaling	1.18	0.143	1.387	RAP1B,RAP2B,SOCS3,TYK2,NFKB2,NFKB1,RAP1A,STAT4,BCL2L1,JUN,CDKN1A,STAT5B,MAP2K1
Osteoarthritis Pathway	1.18	0.123	1.528	FN1,CTNNA1,NFKB1,TGFBR2,IL1R2,CASP6,CXCR2,ANXA5,CASP1,S100A8,MYBBP1A,CASP8,TNFRSF1B,ITGA4,PPARG,ITGB1,HDAC4,NFKB2,IL18RAP,HDAC3,S100A9,MEF2C,P2RX7,TCF7L2,MMP9,LRP1
Pyridoxal 5'-phosphate Salvage Pathway	1.18	0.154	1.897	PDXK,PRKX,SGK1,PRKCD,CSNK1A1,CDK4,MAP3K8,HIPK1,ADPGK,MAP2K1
Antioxidant Action of Vitamin C	1.18	0.138	-2.111	PDIA3,NFKB2,MAPK13,NFKB1,GLRX,SLC2A3,GSTO1,PLBD1,PLD4,IKBKB,HMOX1,PLCG2,TXN,NFKBIB,STAT5B
CMP-N-acetylneuraminate Biosynthesis I (Eukaryotes)	1.17	0.4	NaN	NAGK,NANS
Aldosterone Signaling in Epithelial Cells	1.16	0.126	2.449	HSPA14,PDIA3,SGK1,HSPA9,DNAJC19,HSPA1A/HSPA1B,TRAP1,DNAJC15,HSPD1,HSPA5,DNAJC11,HSPA8,HSPA4,HSP90B1,HSP90AB1,PLCG2,PRKCD,DNAJB11,HSPE1,MAP2K1,DNAJC7,AHCY
Ethanol Degradation IV	1.15	0.2	1.342	ALDH1B1,CAT,ACSS1,ALDH9A1,ACSL1
UVC-Induced MAPK Signaling	1.15	0.163	2.121	RAP2B,RAP1B,TP53,JUN,PRKCD,MAPK13,MAP2K1,RAP1A
Valine Degradation I	1.13	0.222	2	ECHS1,BCKDHA,HIBADH,HADHB
Neuregulin Signaling	1.12	0.14	3	ITGB1,RAP1B,RAP2B,RAP1A,RPS6,HSP90B1,HSP90AB1,PLCG2,PRKCD,STAT5B,MAP2K1,ITGA4,PSEN1
IL-12 Signaling and Production in Macrophages	1.12	0.128	NaN	PPARG,APOE,APOC2,IFNGR1,MAPK13,NFKB2,PCYOX1,NFKB1,STAT4,IKBKB,JUN,CD40,PRKCD,S100A8,MAP3K8,IRF8,REL,NFKBIB,MAP2K1
PKCÎ¸ Signaling in T Lymphocytes	1.11	0.126	3.71	RAP2B,RAP1B,RAC2,HLA-A,MAP3K1,HLA-DQA1,NFKB2,HLA-DQB1,NFKB1,CD3D,RAP1A,IKBKB,JUN,HLA-DMA,PLCG2,HLA-DMB,FCER1G,VAV1,MAP3K8,NFKBIB,HLA-DRB5
Glycolysis I	1.09	0.192	0.447	GPI,TPI1,ENO3,PKM,PFKL
Prostate Cancer Signaling	1.09	0.136	NaN	TP53,RAP1B,RAP2B,TFDP1,PA2G4,NFKB2,NFKB1,RAP1A,HSP90B1,HSP90AB1,CDKN1A,NFKBIB,MAP2K1,GSTP1
Bladder Cancer Signaling	1.09	0.138	2	RAP2B,RAP1B,TP53,PA2G4,TFDP1,THBS1,MMP8,CDKN1A,CDK4,MMP25,MAP2K1,RAP1A,MMP9
p53 Signaling	1.07	0.133	0.333	TP53,TP53INP1,HDAC1,CDK4,BAX,ST13,BIRC5,CCNG1,BCL2L1,CASP6,PCNA,JUN,GADD45A,THBS1,CDKN1A
LPS-stimulated MAPK Signaling	1.06	0.137	1.732	RAP2B,RAP1B,NFKB2,MAPK13,NFKB1,RAP1A,IKBKB,JUN,PRKCD,CD14,LBP,NFKBIB,MAP2K1
Purine Nucleotides Degradation II (Aerobic)	1.06	0.211	0	GDA,IMPDH2,NT5E,NT5C
PEDF Signaling	1.06	0.137	2.887	RAP2B,RAP1B,TP53,PPARG,BCL2L1,IKBKB,MAPK13,NFKB2,NFKBIB,CASP8,NFKB1,RAP1A,TCF7L2
Hepatic Cholestasis	1.06	0.125	NaN	MAP4K2,CYP27A1,NFKB2,NFKB1,HSD3B7,IL18RAP,IL1R2,IKBKB,IL36G,LY96,JUN,IL1RN,PRKCD,OSM,CD14,LBP,TNFRSF1B,TIRAP,NFKBIB,ADCY7
Guanosine Nucleotides Degradation III	1.06	0.25	NaN	GDA,NT5E,NT5C
STAT3 Pathway	1.06	0.129	1.265	RAP2B,RAP1B,SOCS3,IL13RA1,TYK2,IL6R,MAPK13,RAP1A,NDUFA13,IL18RAP,TGFBR2,IL1R2,CXCR2,CDKN1A,IL10RA,MAP2K1,IFNAR1
Phagosome Formation	1.06	0.129	NaN	ITGB1,C5AR1,FN1,MSR1,PDIA3,FCGR1A,CLEC7A,ITGAM,RND3,PRKCD,PLCG2,TLR7,FCER1G,C3AR1,FCGR3A/FCGR3B,ITGAX,ITGA4
PTEN Signaling	1.05	0.13	-2	RAP2B,RAP1B,ITGB1,RAC2,YWHAH,NFKB2,NFKB1,RAP1A,TGFBR2,BCL2L1,IKBKB,INPP5F,CDKN1A,MCRS1,MAP2K1,ITGA4
Glutamate Removal from Folates	1.04	1	NaN	GGH
Histamine Biosynthesis	1.04	1	NaN	HDC
Germ Cell-Sertoli Cell Junction Signaling	1.04	0.122	NaN	RAP2B,RAP1B,ITGB1,TUBA1B,RAC2,PXN,CFL1,MAP3K1,TUBB2A,CTNNA1,GSN,TUBB,RAP1A,TGFBR2,TUBA1A,TUBA8,TUBB6,ACTA2,RND3,MTMR2,MAP3K8,MAP2K1
Lymphotoxin Î² Receptor Signaling	1.04	0.145	0.378	IKBKB,BCL2L1,VCAM1,RELB,LTB,CYCS,NFKB2,LTBR,NFKB1,TNFSF14
Remodeling of Epithelial Adherens Junctions	1.04	0.145	NaN	TUBA1B,NME1,TUBA1A,TUBA8,TUBB6,ACTA2,ARPC5L,TUBB2A,CTNNA1,TUBB
Coagulation System	1.04	0.171	0	F10,PROS1,F5,F13A1,PLAUR,THBD
Small Cell Lung Cancer Signaling	1.03	0.138	0.816	TP53,IKBKB,BCL2L1,MAX,PA2G4,TFDP1,CDK4,CKS1B,CYCS,NFKB2,NFKB1,NFKBIB
Urea Cycle	1.02	0.333	NaN	ASS1,ARG2
Ceramide Degradation	1.02	0.333	NaN	ACER3,ASAH1
Glycogen Biosynthesis II (from UDP-D-Glucose)	1.02	0.333	NaN	GYS1,GBE1
Erythropoietin Signaling	1	0.136	NaN	RAP1B,RAP2B,SOCS3,JUN,PRKCD,PLCG2,NFKB2,NFKB1,NFKBIB,STAT5B,MAP2K1,RAP1A
Xenobiotic Metabolism Signaling	1	0.114	NaN	RAP2B,RAP1B,CAMK1,GSTM5,MAPK13,NFKB1,PTGES3,CHST15,HMOX1,HSP90B1,HSP90AB1,Ugt1a7c,SUMO1,MAP2K1,ALDH1B1,MGST1,HDAC4,MAP3K1,NFKB2,CHST12,RAP1A,ALDH9A1,GSTO1,ESD,FTL,MGST2,PRKCD,CAT,MAP3K8,CHST13,NDST1,GSTP1,MGST3,DNAJC7
iCOS-iCOSL Signaling in T Helper Cells	1	0.128	3.051	Calm1 (includes others),HLA-A,CSK,HLA-DQA1,HLA-DQB1,NFKB2,NFKB1,CD3D,IKBKB,CD40,HLA-DMA,HLA-DMB,FCER1G,VAV1,NFKBIB,HLA-DRB5
Agranulocyte Adhesion and Diapedesis	0.996	0.12	NaN	ITGB1,VCAM1,SELL,ICAM1,C5AR1,FN1,MYH9,CLDN15,MMP25,ITGB7,Ccl9,IL36G,ACTA2,CLDN1,IL1RN,CXCR2,Ccl2,MMP8,PECAM1,Ccl6,MMP9,MSN,ITGA4
Fatty Acid Activation	0.971	0.231	NaN	ACSL5,SLC27A4,ACSL1
Urate Biosynthesis/Inosine 5'-phosphate Degradation	0.971	0.231	NaN	NT5E,IMPDH2,NT5C
Mevalonate Pathway I	0.971	0.231	NaN	MVD,ACAT1,HADHB
Leukocyte Extravasation Signaling	0.967	0.117	0.209	RAP1B,RAC2,ICAM1,CLDN15,CTNNA1,MAPK13,MMP25,MMP8,VASP,ITGA4,ITGB1,VCAM1,PXN,NCF4,RAP1A,NCF1,ITGAM,ACTA2,CLDN1,PRKCD,PLCG2,PECAM1,VAV1,MMP9,MSN
Activation of IRF by Cytosolic Pattern Recognition Receptors	0.947	0.143	1.667	IKBKB,JUN,CD40,PPIB,MAVS,NFKB2,NFKB1,NFKBIB,IFNAR1
Noradrenaline and Adrenaline Degradation	0.947	0.162	1.633	ADH5,ALDH1B1,AKR1A1,DHRS9,COMT,ALDH9A1
Oxidative Ethanol Degradation III	0.936	0.19	1	ALDH1B1,ACSS1,ALDH9A1,ACSL1
Thyroid Cancer Signaling	0.928	0.152	NaN	PPARG,RAP2B,RAP1B,TP53,RAP1A,MAP2K1,TCF7L2
Pyrimidine Ribonucleotides De Novo Biosynthesis	0.928	0.152	1.89	NUDT5,NME1,ENTPD1,NUDT9,NME2,CMPK1,UMPS
Ceramide Signaling	0.907	0.129	2.496	RAP2B,RAP1B,S1PR5,MAP3K1,NFKB2,NFKB1,RAP1A,S1PR4,CTSD,JUN,CYCS,TNFRSF1B,MAP2K1
Pentose Phosphate Pathway (Non-oxidative Branch)	0.896	0.286	NaN	TKT,TALDO1
Acetyl-CoA Biosynthesis I (Pyruvate Dehydrogenase Complex)	0.896	0.286	NaN	PDHA1,PDHB
Aspartate Degradation II	0.896	0.286	NaN	MDH1,GOT2
Natural Killer Cell Signaling	0.893	0.123	NaN	RAP2B,RAP1B,RAC2,LAIR1,SH3BP2,RAP1A,CD300A,INPP5F,PLCG2,PRKCD,FCER1G,VAV1,HCST,SH2D1B,MAP2K1,FCGR3A/FCGR3B
p70S6K Signaling	0.883	0.121	3.317	RAP2B,RAP1B,YWHAG,YWHAH,YWHAE,YWHAB,PDIA3,EEF2,YWHAZ,RAP1A,YWHAQ,RPS6,PLCG2,PRKCD,LYN,BCAP31,MAP2K1
Cell Cycle Control of Chromosomal Replication	0.883	0.143	NaN	MCM3,MCM5,MCM6,PCNA,CDK4,DNA2,RPA1,MCM7
SAPK/JNK Signaling	0.87	0.125	2.138	RAP1B,TP53,MAP4K2,RAP2B,DAXX,TRADD,RAC2,JUN,GADD45A,MAP3K1,FCER1G,MAP4K1,RAP1A,HNRNPK
IL-15 Signaling	0.866	0.131	NaN	RAP1B,RAP2B,BCL2L1,VCAM1,TYK2,NFKB2,MAPK13,NFKB1,STAT5B,MAP2K1,RAP1A
Pancreatic Adenocarcinoma Signaling	0.86	0.123	1.732	TP53,TFDP1,PA2G4,TYK2,CDK4,NFKB2,NFKB1,BIRC5,PLD4,TGFBR2,BCL2L1,HMOX1,CDKN1A,MAP2K1,MMP9
Amyotrophic Lateral Sclerosis Signaling	0.848	0.124	-0.535	TP53,NAIP,GPX1,SOD1,BAX,GRINA,CCS,BCL2L1,CAPN1,CAT,CASP1,CYCS,CAPN2,SSR4
Superpathway of Citrulline Metabolism	0.827	0.2	NaN	OAT,ASS1,ARG2
NF-ÎºB Activation by Viruses	0.824	0.126	3.464	ITGB1,RAP1B,RAP2B,IKBKB,PRKCD,MAP3K1,NFKB2,NFKB1,NFKBIB,RAP1A,TNFRSF14,ITGA4
3-phosphoinositide Biosynthesis	0.824	0.114	4.379	SOCS3,MINPP1,NUDT9,MDP1,NUDT14,IGBP1,NT5C,NUDT5,SET,ATP1A1,PTPRJ,INPP5F,PTPRO,PPM1H,MTMR2,VAV1,PIK3AP1,DUSP12,PPP1CA,NUDT4,PPP5C,SIRPA,DUSP16
Allograft Rejection Signaling	0.815	0.128	NaN	HLA-G,B2M,CD40,HLA-A,HLA-DMA,HLA-DMB,HLA-DQA1,FCER1G,HLA-DQB1,HLA-E,HLA-DRB5
Sertoli Cell-Sertoli Cell Junction Signaling	0.81	0.115	NaN	RAP2B,RAP1B,ITGB1,TUBA1B,CLDN15,MAP3K1,TUBB2A,CTNNA1,MAPK13,TUBB,RAP1A,JUN,TUBA1A,TUBA8,TUBB6,ACTA2,CLDN1,MTMR2,MAP3K8,MAP2K1,ITGA4
Chemokine Signaling	0.804	0.13	1.265	RAP1B,RAP2B,JUN,Calm1 (includes others),CAMK1,CFL1,PLCG2,MAPK13,MAP2K1,RAP1A
IL-4 Signaling	0.801	0.125	NaN	RAP1B,RAP2B,INPP5F,IL13RA1,HLA-A,HLA-DMA,HLA-DMB,TYK2,HLA-DQA1,HLA-DQB1,RAP1A,HLA-DRB5
Airway Pathology in Chronic Obstructive Pulmonary Disease	0.799	0.25	NaN	MMP8,MMP9
Sphingosine and Sphingosine-1-phosphate Metabolism	0.799	0.25	NaN	ACER3,ASAH1
Superoxide Radicals Degradation	0.799	0.25	NaN	CAT,SOD1
Sphingomyelin Metabolism	0.799	0.25	NaN	SGMS2,SGMS1
Mechanisms of Viral Exit from Host Cells	0.788	0.146	NaN	CHMP6,ACTA2,CHMP2B,PRKCD,PDCD6IP,TSG101
Assembly of RNA Polymerase II Complex	0.788	0.14	NaN	TAF9,POLR2F,TAF6,POLR2D,POLR2C,POLR2E,POLR2J
VDR/RXR Activation	0.78	0.128	-1.633	SERPINB1,CAMP,GADD45A,PRKCD,CDKN1A,MXD1,CD14,THBD,KLF4,PSMC5
IL-22 Signaling	0.777	0.167	0	SOCS3,TYK2,MAPK13,STAT5B
FAK Signaling	0.77	0.121	NaN	ITGB1,RAP1B,RAP2B,PXN,ARHGAP26,ACTA2,CAPN1,PLCG2,CSK,CAPN2,MAP2K1,RAP1A,ITGA4
Granzyme B Signaling	0.764	0.188	NaN	CYCS,CASP8,PARP1
Guanine and Guanosine Salvage I	0.762	0.5	NaN	HPRT1
L-DOPA Degradation	0.762	0.5	NaN	COMT
Uridine-5'-phosphate Biosynthesis	0.762	0.5	NaN	UMPS
Spermidine Biosynthesis I	0.762	0.5	NaN	SRM
Sulfate Activation for Sulfonation	0.762	0.5	NaN	PAPSS1
Glycine Degradation (Creatine Biosynthesis)	0.762	0.5	NaN	GATM
Adenine and Adenosine Salvage I	0.762	0.5	NaN	APRT
GDP-L-fucose Biosynthesis I (from GDP-D-mannose)	0.762	0.5	NaN	TSTA3
Glycine Biosynthesis I	0.762	0.5	NaN	SHMT2
Glutamate Biosynthesis II	0.762	0.5	NaN	GLUD1
Glutamate Degradation X	0.762	0.5	NaN	GLUD1
Apelin Endothelial Signaling Pathway	0.759	0.118	2.84	RAP1B,RAP2B,VCAM1,ICAM1,HDAC4,Calm1 (includes others),MEF2A,NFKB2,NFKB1,RAP1A,JUN,PRKCD,MEF2C,MAP2K1,ADCY7
Amyloid Processing	0.757	0.137	-1.633	CAPN1,APH1A,CSNK1A1,NCSTN,CAPN2,MAPK13,PSEN1
Prostanoid Biosynthesis	0.714	0.222	NaN	PTGS1,PTGES3
Sucrose Degradation V (Mammalian)	0.714	0.222	NaN	KHK,TPI1
Citrulline Biosynthesis	0.714	0.222	NaN	OAT,ARG2
Î³-linolenate Biosynthesis II (Animals)	0.71	0.176	NaN	ACSL5,SLC27A4,ACSL1
Mitochondrial L-carnitine Shuttle Pathway	0.71	0.176	NaN	ACSL5,SLC27A4,ACSL1
CD40 Signaling	0.708	0.123	1.667	IKBKB,JUN,ICAM1,CD40,PTGS1,NFKB2,MAPK13,NFKB1,NFKBIB,MAP2K1
Actin Nucleation by ARP-WASP Complex	0.708	0.129	2.121	RAP2B,RAP1B,ITGB1,RND3,ARPC5L,RAP1A,VASP,ITGA4
Integrin Signaling	0.693	0.109	0.853	RAP2B,RAP1B,ITGB1,RAC2,PXN,ARHGAP26,PFN1,ARPC5L,GSN,RAP1A,ITGB7,TSPAN3,ITGAM,ACTA2,RND3,CAPN1,PLCG2,ARF4,CAPN2,MAP2K1,Arf2,VASP,ITGAX,ITGA4
Role of RIG1-like Receptors in Antiviral Innate Immunity	0.69	0.136	2.236	IKBKB,MAVS,NFKB2,NFKB1,CASP8,NFKBIB
Pyrimidine Ribonucleotides Interconversion	0.69	0.136	1.633	NUDT5,NME1,ENTPD1,NUDT9,NME2,CMPK1
Stearate Biosynthesis I (Animals)	0.69	0.136	0	FAM213B,ACSL5,ACOT7,SLC27A4,ACSL1,MBOAT7
HGF Signaling	0.688	0.116	2.496	RAP2B,ITGB1,RAP1B,PXN,MAP3K1,RAP1A,ELF1,JUN,PLCG2,PRKCD,CDKN1A,MAP3K8,MAP2K1,ITGA4
Antiproliferative Role of TOB in T Cell Signaling	0.688	0.154	NaN	PABPC1,TGFBR2,CCNA2,CUL1
Estrogen-mediated S-phase Entry	0.688	0.154	NaN	CCNA2,TFDP1,CDKN1A,CDK4
Gluconeogenesis I	0.688	0.154	1	GPI,ENO3,ME2,MDH1
HMGB1 Signaling	0.686	0.113	2.5	RAP2B,RAP1B,VCAM1,ICAM1,HAT1,RBBP7,IFNGR1,NFKB2,MAPK13,NFKB1,RAP1A,JUN,RND3,OSM,TNFRSF1B,MAP2K1
Î±-Adrenergic Signaling	0.68	0.12	2.121	RAP1B,RAP2B,Calm1 (includes others),GYS1,PRKCD,PLCG2,PYGL,ADCY7,MAP2K1,RAP1A,GNG10
Phospholipase C Signaling	0.66	0.107	3.9	RAP1B,RAP2B,PEBP1,Calm1 (includes others),NFKB1,HMOX1,AHNAK,MAP2K1,ITGA4,ITGB1,HDAC4,HDAC1,MEF2A,NFKB2,RAP1A,CD3D,GNG10,PLD4,HDAC3,RND3,PLCG2,PRKCD,LYN,FCER1G,MEF2C,ADCY7
UVA-Induced MAPK Signaling	0.654	0.115	2.449	TP53,RAP1B,RAP2B,PDIA3,PARP2,MAPK13,RAP1A,PARP1,BCL2L1,JUN,PLCG2,CYCS,RPS6KA4
IGF-1 Signaling	0.654	0.115	1.134	RAP2B,RAP1B,SOCS3,PXN,YWHAG,YWHAH,YWHAE,YWHAB,YWHAZ,RAP1A,YWHAQ,JUN,MAP2K1
GÎ±12/13 Signaling	0.652	0.112	3.357	RAP2B,RAP1B,PXN,MAP3K1,MEF2A,NFKB2,NFKB1,RAP1A,IKBKB,LPAR6,JUN,LPAR5,MEF2C,VAV1,NFKBIB,MAP2K1
eNOS Signaling	0.642	0.109	-0.5	Calm1 (includes others),HSPA14,Hspa1b,HSPA9,HSPA1A/HSPA1B,HSPA5,HSPA8,CCNA2,HSPA4,NOSIP,HSP90B1,LPAR6,HSP90AB1,STUB1,PLCG2,PRKCD,LPAR5,CASP8,ADCY7
Ketogenesis	0.642	0.2	NaN	ACAT1,HADHB
Ketolysis	0.642	0.2	NaN	ACAT1,HADHB
Mineralocorticoid Biosynthesis	0.642	0.2	NaN	EBP,HSD3B7
Estrogen Receptor Signaling	0.636	0.112	NaN	RAP2B,RAP1B,TAF9,POLR2F,TAF6,POLR2D,POLR2J,PHB2,RAP1A,MED27,DDX5,HDAC3,POLR2C,POLR2E,MAP2K1
Rac Signaling	0.635	0.113	3.207	RAP2B,ITGB1,RAP1B,CFL1,ARPC5L,MAP3K1,BRK1,NFKB2,NFKB1,RAP1A,CYFIP2,JUN,MAP2K1,ITGA4
ERK/MAPK Signaling	0.635	0.107	2	RAP2B,RAP1B,ITGB1,PPARG,RAC2,PXN,YWHAG,YWHAH,YWHAB,VRK2,YWHAZ,RAP1A,EIF4E,ELF1,YWHAQ,PPP1R3D,PLCG2,PRKCD,RPS6KA4,PPP1CA,MAP2K1,ITGA4
Agrin Interactions at Neuromuscular Junction	0.627	0.12	1	ITGB1,RAP1B,RAP2B,RAC2,PXN,JUN,ACTA2,RAP1A,ITGA4
Superpathway of Inositol Phosphate Compounds	0.62	0.105	4.6	SOCS3,MINPP1,NUDT9,MDP1,NUDT14,NT5C,IGBP1,PLD4,NUDT5,SET,ATP1A1,INPP5F,PTPRJ,PTPRO,PLCG2,PPM1H,VAV1,PIK3AP1,MTMR2,NUDT4,PPP1CA,DUSP12,PPP5C,SIRPA,DUSP16
NGF Signaling	0.618	0.112	3.742	TP53,RAP1B,RAP2B,MAP3K1,BAX,NFKB2,NFKB1,RAP1A,IKBKB,PLCG2,PRKCD,MAP3K8,RPS6KA4,MAP2K1
Methylglyoxal Degradation III	0.613	0.158	NaN	AKR1A1,FAM213B,AKR1B1
DNA damage-induced 14-3-3Ïƒ Signaling	0.613	0.158	NaN	TP53,CCNB2,CCNB1
L-carnitine Biosynthesis	0.606	0.333	NaN	ALDH9A1
Diphthamide Biosynthesis	0.606	0.333	NaN	EEF2
Methylglyoxal Degradation I	0.606	0.333	NaN	GLO1
Tetrahydrobiopterin Biosynthesis I	0.606	0.333	NaN	SPR
L-cysteine Degradation III	0.606	0.333	NaN	GOT2
Inosine-5'-phosphate Biosynthesis II	0.606	0.333	NaN	PAICS
4-hydroxyproline Degradation I	0.606	0.333	NaN	GOT2
Thiosulfate Disproportionation III (Rhodanese)	0.606	0.333	NaN	TST
Thyroid Hormone Biosynthesis	0.606	0.333	NaN	CTSD
Oxidized GTP and dGTP Detoxification	0.606	0.333	NaN	RUVBL2
Tetrahydrobiopterin Biosynthesis II	0.606	0.333	NaN	SPR
Glutamate Degradation II	0.606	0.333	NaN	GOT2
S-adenosyl-L-methionine Biosynthesis	0.606	0.333	NaN	MAT2A
Aspartate Biosynthesis	0.606	0.333	NaN	GOT2
Triacylglycerol Biosynthesis	0.602	0.128	-1.633	AGPAT4,LPCAT2,AGPAT2,DGAT2,DGAT1,MBOAT7
Cdc42 Signaling	0.597	0.108	1.667	ITGB1,B2M,CFL1,HLA-A,ARPC5L,HLA-DQA1,MAPK13,HLA-DQB1,CD3D,HLA-G,JUN,HLA-DMA,HLA-DMB,FCER1G,VAV1,HLA-E,HLA-DRB5,ITGA4
T Cell Receptor Signaling	0.585	0.111	NaN	RAP2B,RAP1B,Calm1 (includes others),CSK,MAP3K1,NFKB2,NFKB1,RAP1A,CD3D,IKBKB,JUN,VAV1,MAP2K1
Tight Junction Signaling	0.583	0.107	NaN	MYH9,CLDN15,HSF1,CDK4,CTNNA1,NFKB2,NFKB1,GPAA1,TGFBR2,NSF,JUN,ACTA2,CLDN1,NUDT21,TNFRSF1B,GOSR2,NAPA,VASP
Cholecystokinin/Gastrin-mediated Signaling	0.583	0.112	1.732	RAP1B,RAP2B,PXN,IL36G,JUN,RND3,IL1RN,PRKCD,MEF2A,MEF2C,MAP2K1,RAP1A
Estrogen-Dependent Breast Cancer Signaling	0.583	0.115	2.646	HSD17B10,RAP1B,RAP2B,JUN,HSD17B12,NFKB2,NFKB1,STAT5B,HSD17B4,RAP1A
Purine Nucleotides De Novo Biosynthesis II	0.582	0.182	NaN	IMPDH2,PAICS
Glucocorticoid Biosynthesis	0.582	0.182	NaN	EBP,HSD3B7
UDP-N-acetyl-D-galactosamine Biosynthesis II	0.582	0.182	NaN	GPI,HK3
The Visual Cycle	0.569	0.15	NaN	DHRS3,DHRS9,RDH12
Role of Pattern Recognition Receptors in Recognition of Bacteria and Viruses	0.559	0.108	0.905	OAS1,NLRP3,C5AR1,C3,NFKB2,EIF2S1,NFKB1,CLEC7A,PLCG2,PRKCD,TLR7,CASP1,MAVS,OSM,C3AR1
fMLP Signaling in Neutrophils	0.556	0.109	2.111	RAP2B,RAP1B,Calm1 (includes others),ARPC5L,FPR2,NFKB2,NFKB1,RAP1A,GNG10,FPR1,NCF1,PRKCD,NFKBIB,MAP2K1
Telomerase Signaling	0.553	0.109	2.121	TP53,RAP1B,RAP2B,HDAC4,HDAC1,RAP1A,PTGES3,ELF1,HSP90B1,HDAC3,HSP90AB1,CDKN1A,MAP2K1
Regulation of Actin-based Motility by Rho	0.545	0.112	0.707	ITGB1,RAC2,PFN1,CFL1,ACTA2,RND3,ARPC5L,ARHGDIA,GSN,ITGA4
Macropinocytosis Signaling	0.545	0.112	2.646	ITGB1,RAP1B,RAP2B,ABI1,PRKCD,PLCG2,CD14,RAP1A,CSF1R,ITGB7
Assembly of RNA Polymerase I Complex	0.527	0.167	NaN	POLR1D,POLR2F
ErbB4 Signaling	0.526	0.112	2.449	RAP1B,RAP2B,PRKCD,APH1A,PLCG2,NCSTN,MAP2K1,RAP1A,PSEN1
Apelin Adipocyte Signaling Pathway	0.526	0.112	0.333	MGST1,MGST2,CAT,GPX1,SOD1,MAPK13,ADCY7,GSTP1,MGST3
IL-1 Signaling	0.51	0.11	2.121	ECSIT,IKBKB,JUN,MAP3K1,NFKB2,MAPK13,NFKB1,NFKBIB,ADCY7,GNG10
Th17 Activation Pathway	0.51	0.11	1.265	STAT4,SOCS3,HSP90B1,HSP90AB1,BATF,IL6R,TYK2,FCER1G,NFKB2,NFKB1
Arsenate Detoxification I (Glutaredoxin)	0.5	0.25	NaN	GSTO1
Uracil Degradation II (Reductive)	0.5	0.25	NaN	DPYSL2
PRPP Biosynthesis I	0.5	0.25	NaN	PRPS1
Branched-chain Î±-keto acid Dehydrogenase Complex	0.5	0.25	NaN	BCKDHA
Spermine and Spermidine Degradation I	0.5	0.25	NaN	SAT1
Î±-tocopherol Degradation	0.5	0.25	NaN	CYP4F2
Thymine Degradation	0.5	0.25	NaN	DPYSL2
L-cysteine Degradation I	0.5	0.25	NaN	GOT2
N-acetylglucosamine Degradation II	0.5	0.25	NaN	NAGK
Phenylalanine Degradation I (Aerobic)	0.5	0.25	NaN	QDPR
Adrenomedullin signaling pathway	0.488	0.101	2.683	RAP2B,RAP1B,CRCP,PPARG,Calm1 (includes others),C3,PDIA3,CSK,BAX,MAPK13,NFKB2,NFKB1,RAP1A,IL36G,MAX,IL1RN,PLCG2,CFH,ADCY7,MAP2K1,SLC39A7
Thrombopoietin Signaling	0.485	0.111	2.828	RAP2B,RAP1B,JUN,PRKCD,PLCG2,STAT5B,MAP2K1,RAP1A
Ephrin B Signaling	0.485	0.111	0.816	RAC2,PXN,ABI1,CFL1,CAP1,VAV1,HNRNPK,GNG10
Type II Diabetes Mellitus Signaling	0.483	0.103	2.309	PPARG,SOCS3,CD36,MAP3K1,PKM,NFKB2,NFKB1,ADIPOR1,SLC27A4,IKBKB,TRADD,PRKCD,ACSL5,TNFRSF1B,NFKBIB,ACSL1
Intrinsic Prothrombin Activation Pathway	0.48	0.119	0	F10,PROS1,F5,F13A1,THBD
Role of IL-17A in Psoriasis	0.479	0.154	NaN	S100A9,S100A8
Choline Biosynthesis III	0.479	0.154	NaN	PLD4,HMOX1
Cholesterol Biosynthesis I	0.479	0.154	NaN	EBP,LBR
Bile Acid Biosynthesis, Neutral Pathway	0.479	0.154	NaN	CYP27A1,HSD3B7
Cholesterol Biosynthesis II (via 24,25-dihydrolanosterol)	0.479	0.154	NaN	EBP,LBR
Cholesterol Biosynthesis III (via Desmosterol)	0.479	0.154	NaN	EBP,LBR
TGF-Î² Signaling	0.478	0.108	1.897	TGFBR2,RAP1B,RAP2B,JUN,HDAC1,MAP4K1,MAPK13,MAP2K1,RAP1A,INHBA
RANK Signaling in Osteoclasts	0.467	0.106	1.897	IKBKB,JUN,Calm1 (includes others),MAP3K1,MAP3K8,NFKB2,MAPK13,NFKB1,GSN,NFKBIB,MAP2K1
Melanoma Signaling	0.463	0.111	1.134	RAP2B,RAP1B,TP53,CDKN1A,CDK4,RAP1A,MAP2K1
Pyrimidine Deoxyribonucleotides De Novo Biosynthesis I	0.46	0.13	NaN	NME1,NME2,CMPK1
Putrescine Degradation III	0.46	0.13	NaN	ALDH1B1,SAT1,ALDH9A1
Actin Cytoskeleton Signaling	0.458	0.0996	1.606	RAP2B,RAP1B,ITGB1,RAC2,PXN,PFN1,FN1,MYH9,CFL1,ARPC5L,CSK,BRK1,GSN,RAP1A,CYFIP2,ACTA2,CD14,VAV1,LBP,NCKAP1L,MAP2K1,MSN,ITGA4
Androgen Signaling	0.458	0.103	1.134	HSPA4,CALR,POLR2F,POLR2C,JUN,Calm1 (includes others),POLR2D,POLR2E,PRKCD,POLR2J,NFKB2,NFKB1,GNG10,NCOA4
HIF1Î± Signaling	0.452	0.103	NaN	TP53,RAP1B,RAP2B,EGLN2,MAPK13,MMP25,NAA10,RAP1A,SLC2A3,JUN,MMP8,APEX1,MMP9
CDK5 Signaling	0.452	0.105	1.265	ITGB1,RAP1B,RAP2B,PPP1R3D,CAPN1,EGR1,MAPK13,PPP1CA,ADCY7,MAP2K1,RAP1A
RAR Activation	0.444	0.1	NaN	DHRS3,CSK,RELB,MAP3K1,MAPK13,NFKB2,RPL7A,NFKB1,PSMC5,PARP1,JUN,DHRS9,PRKCD,SMARCB1,RDH12,REL,STAT5B,ADCY7,MAP2K1
HIPPO signaling	0.44	0.106	-2.449	YWHAQ,PPP1R3D,YWHAG,YWHAE,YWHAH,YWHAB,CUL1,YWHAZ,PPP1CA
Triacylglycerol Degradation	0.439	0.111	0.816	ABHD12,TARS2,DAGLB,MGLL,NDST1,AARSD1
Breast Cancer Regulation by Stathmin1	0.437	0.0991	NaN	RAP2B,RAP1B,TP53,TUBA1B,CAMK1,Calm1 (includes others),TUBB2A,TUBB,RAP1A,TSG101,GNG10,STMN1,PPP1R3D,TUBA1A,TUBA8,TUBB6,PRKCD,CDKN1A,PPP1CA,ADCY7,MAP2K1
Androgen Biosynthesis	0.437	0.143	NaN	EBP,HSD3B7
Role of JAK2 in Hormone-like Cytokine Signaling	0.431	0.118	NaN	SOCS3,TYK2,STAT5B,SIRPA
Epithelial Adherens Junction Signaling	0.428	0.101	NaN	RAP2B,RAP1B,TUBA1B,MYH9,ARPC5L,TUBB2A,CTNNA1,TUBB,RAP1A,TGFBR2,TUBA1A,ACTA2,TUBB6,TUBA8,TCF7L2
Angiopoietin Signaling	0.425	0.105	1.667	RAP1B,RAP2B,IKBKB,NFKB2,NFKB1,NFKBIB,STAT5B,BIRC5,RAP1A
Trehalose Degradation II (Trehalase)	0.423	0.2	NaN	HK3
Protein Citrullination	0.423	0.2	NaN	PADI4
Creatine-phosphate Biosynthesis	0.423	0.2	NaN	CKB
2-ketoglutarate Dehydrogenase Complex	0.423	0.2	NaN	OGDH
Tetrahydrofolate Salvage from 5,10-methenyltetrahydrofolate	0.423	0.2	NaN	MTHFD2
Tetrapyrrole Biosynthesis II	0.423	0.2	NaN	HMBS
Eumelanin Biosynthesis	0.423	0.2	NaN	MIF
Myo-inositol Biosynthesis	0.423	0.2	NaN	INPP5F
Trans, trans-farnesyl Diphosphate Biosynthesis	0.423	0.2	NaN	FDPS
Citrulline-Nitric Oxide Cycle	0.423	0.2	NaN	ASS1
dTMP De Novo Biosynthesis	0.423	0.2	NaN	SHMT2
Folate Polyglutamylation	0.423	0.2	NaN	SHMT2
Cancer Drug Resistance By Drug Efflux	0.42	0.109	NaN	RAP1B,RAP2B,TP53,NFKB1,MAP2K1,RAP1A
Renin-Angiotensin Signaling	0.401	0.1	2.887	RAP1B,RAP2B,JUN,PRKCD,PLCG2,MAP3K1,MAPK13,NFKB2,NFKB1,MAP2K1,ADCY7,RAP1A,ACE
IL-17A Signaling in Gastric Cells	0.4	0.12	NaN	JUN,MAPK13,NFKB1
Tryptophan Degradation X (Mammalian, via Tryptamine)	0.4	0.12	NaN	ALDH1B1,AKR1A1,ALDH9A1
Glycogen Degradation III	0.398	0.133	NaN	GAA,PYGL
Role of Oct4 in Mammalian Embryonic Stem Cell Pluripotency	0.393	0.109	NaN	TP53,CASP6,PHB,MEF2A,PARP1
Dermatan Sulfate Biosynthesis (Late Stages)	0.393	0.109	-1.342	CHST12,CHST13,NDST1,CHST15,DSE
Calcium Signaling	0.391	0.0971	1.265	RAP2B,RAP1B,CALR,HDAC4,CAMK1,LETM1,Calm1 (includes others),MYH9,ATP2B1,HDAC1,MEF2A,ATP2A3,Tpm1,MCU,RAP1A,GRINA,RCAN1,HDAC3,ACTA2,MEF2C
Paxillin Signaling	0.382	0.0992	0.333	ITGB1,RAP1B,RAP2B,PXN,ITGAM,ACTA2,CSK,MAPK13,RAP1A,ITGB7,ITGAX,ITGA4
Eicosanoid Signaling	0.377	0.103	-2	PLBD1,LTA4H,LTB4R,PTGS1,FPR2,ALOX5,DPEP2
nNOS Signaling in Neurons	0.374	0.106	NaN	Calm1 (includes others),PRKCD,CAPN1,CAPN2,GRINA
NAD Salvage Pathway II	0.374	0.115	NaN	NT5E,NT5C,Acp5
Chondroitin Sulfate Degradation (Metazoa)	0.365	0.125	NaN	GM2A,HEXA
Adenosine Nucleotides Degradation II	0.365	0.125	NaN	NT5E,NT5C
Molecular Mechanisms of Cancer	0.364	0.0939	NaN	RAP2B,RAP1B,RAC2,PA2G4,CTNNA1,CDK4,NCSTN,MAPK13,NFKB1,TGFBR2,CASP6,JUN,CCND3,CASP8,NFKBIB,MAP2K1,ITGA4,ITGB1,TP53,NAIP,TFDP1,HAT1,TYK2,NFKB2,BAX,RAP1A,DAXX,BCL2L1,MAX,RND3,APH1A,PRKCD,CDKN1A,CYCS,ADCY7,LRP1,PSEN1
Selenocysteine Biosynthesis II (Archaea and Eukaryotes)	0.363	0.167	NaN	SARS
Zymosterol Biosynthesis	0.363	0.167	NaN	LBR
Rapoport-Luebering Glycolytic Shunt	0.363	0.167	NaN	MINPP1
Lactose Degradation III	0.363	0.167	NaN	PSAP
RhoA Signaling	0.359	0.0976	0.577	LPAR6,SEPT5,PFN1,CFL1,SEPT9,ACTA2,RND3,ARPC5L,LPAR5,SEPT1,SEPT2,MSN
Role of BRCA1 in DNA Damage Response	0.358	0.1	NaN	TP53,GADD45A,CDKN1A,SMARCB1,BABAM1,RPA1,BRCC3,RFC5
Prolactin Signaling	0.354	0.0989	2.333	RAP1B,RAP2B,SOCS3,JUN,PRKCD,PLCG2,STAT5B,MAP2K1,RAP1A
Colorectal Cancer Metastasis Signaling	0.344	0.0941	1.964	RAP2B,RAP1B,TP53,TYK2,IL6R,IFNGR1,BAX,NFKB2,NFKB1,MMP25,RAP1A,BIRC5,GNG10,TGFBR2,BCL2L1,JUN,RND3,MMP8,TLR7,ADCY7,MAP2K1,MMP9,LRP1,TCF7L2
GM-CSF Signaling	0.344	0.0988	2.121	RAP2B,RAP1B,BCL2L1,LYN,STAT5B,BCL2A1,MAP2K1,RAP1A
Notch Signaling	0.342	0.105	2	APH1A,NUMB,NCSTN,PSEN1
FLT3 Signaling in Hematopoietic Progenitor Cells	0.341	0.0978	1.667	STAT4,RAP1B,RAP2B,RPS6KA4,MAPK13,STAT5B,MAP2K1,RAP1A,EIF4E
Dermatan Sulfate Degradation (Metazoa)	0.333	0.118	NaN	GM2A,HEXA
CNTF Signaling	0.332	0.0986	2.646	RAP1B,RAP2B,LIFR,TYK2,RPS6KA4,MAP2K1,RAP1A
BMP signaling pathway	0.331	0.0976	2.121	RAP2B,RAP1B,JUN,MAPK13,NFKB2,NFKB1,MAP2K1,RAP1A
IL-15 Production	0.326	0.107	NaN	TYK2,NFKB2,NFKB1
Inhibition of Matrix Metalloproteases	0.322	0.103	NaN	MMP8,MMP25,LRP1,MMP9
Fc Epsilon RI Signaling	0.316	0.0945	1.732	RAP1B,RAP2B,RAC2,INPP5F,PRKCD,PLCG2,FCER1G,LYN,VAV1,MAPK13,MAP2K1,RAP1A
Role of NFAT in Cardiac Hypertrophy	0.315	0.0929	2.5	RAP2B,RAP1B,HDAC4,CAMK1,Calm1 (includes others),PDIA3,HDAC1,MAP3K1,MEF2A,CSNK1A1,MAPK13,RAP1A,GNG10,TGFBR2,RCAN1,HDAC3,PLCG2,PRKCD,MEF2C,ADCY7,MAP2K1
Ceramide Biosynthesis	0.313	0.143	NaN	SPTSSA
Thioredoxin Pathway	0.313	0.143	NaN	TXN
Adenine and Adenosine Salvage III	0.313	0.143	NaN	HPRT1
D-myo-inositol (1,3,4)-trisphosphate Biosynthesis	0.306	0.111	NaN	MINPP1,INPP5F
GDNF Family Ligand-Receptor Interactions	0.305	0.0952	2.646	RAP2B,RAP1B,PDLIM7,JUN,PLCG2,DOK1,MAP2K1,RAP1A
GÎ±q Signaling	0.298	0.0926	3.606	RGS18,Calm1 (includes others),CSK,NFKB2,NFKB1,GNG10,PLD4,IKBKB,HMOX1,GYS1,RND3,PRKCD,PLCG2,NFKBIB,MAP2K1
P2Y Purigenic Receptor Signaling Pathway	0.297	0.0929	3.464	RAP1B,RAP2B,PDIA3,NFKB2,NFKB1,RAP1A,GNG10,JUN,P2RY6,PLCG2,PRKCD,MAP2K1,ADCY7
Non-Small Cell Lung Cancer Signaling	0.293	0.0941	1.342	RAP2B,RAP1B,TP53,PA2G4,TFDP1,CDK4,RAP1A,MAP2K1
Serotonin Degradation	0.292	0.0946	1.89	ADH5,ALDH1B1,AKR1A1,EXT2,DHRS9,Ugt1a7c,ALDH9A1
ATM Signaling	0.283	0.0928	0	TP53,JUN,CBX1,GADD45A,CDKN1A,CCNB2,MAPK13,CBX3,CCNB1
Histamine Degradation	0.281	0.105	NaN	ALDH1B1,ALDH9A1
Clathrin-mediated Endocytosis Signaling	0.277	0.0909	NaN	ITGB1,APOE,AP2M1,AP3M1,ARPC5L,NUMB,APOC2,PCYOX1,TSG101,ITGB7,HSPA8,ARRB2,AP1G2,TF,ACTA2,CLTA,RPS27A,S100A8,UBC
Neuroprotective Role of THOP1 in Alzheimer's Disease	0.277	0.0917	0.447	HLA-G,PREP,PRSS57,YWHAE,HLA-A,PRTN3,HTRA2,ECE1,HLA-E,MMP9,ACE
Semaphorin Signaling in Neurons	0.275	0.0943	NaN	DPYSL2,ITGB1,SEMA4D,CFL1,RND3
Histidine Degradation III	0.274	0.125	NaN	MTHFD2
Tryptophan Degradation to 2-amino-3-carboxymuconate Semialdehyde	0.274	0.125	NaN	HAAO
PDGF Signaling	0.272	0.0918	3	RAP1B,RAP2B,JUN,INPP5F,PLCG2,MAP3K1,TYK2,MAP2K1,RAP1A
Retinol Biosynthesis	0.272	0.0952	0	DHRS3,DHRS9,RDH12,ESD
Corticotropin Releasing Hormone Signaling	0.27	0.0909	2.53	RAP1B,JUN,Calm1 (includes others),PRKCD,PLCG2,NR4A1,MEF2A,MEF2C,MAPK13,MAP2K1,ADCY7,RAP1A,SLC39A7
Heparan Sulfate Biosynthesis (Late Stages)	0.268	0.0921	-0.378	EXT2,TARS2,CHST12,CHST13,NDST1,CHST15,AARSD1
ErbB2-ErbB3 Signaling	0.257	0.0909	2.449	RAP1B,RAP2B,JUN,TYK2,STAT5B,MAP2K1,RAP1A
Pathogenesis of Multiple Sclerosis	0.241	0.111	NaN	CCR1
Phosphatidylethanolamine Biosynthesis II	0.241	0.111	NaN	PCYT2
Leucine Degradation I	0.241	0.111	NaN	MCCC2
Heme Biosynthesis II	0.241	0.111	NaN	HMBS
Fatty Acid Î±-oxidation	0.218	0.0909	NaN	ALDH1B1,ALDH9A1
Methionine Degradation I (to Homocysteine)	0.218	0.0909	NaN	MAT2A,AHCY
GDP-glucose Biosynthesis	0.213	0.1	NaN	HK3
Glycine Betaine Degradation	0.213	0.1	NaN	SHMT2
Glucose and Glucose-1-phosphate Degradation	0.188	0.0909	NaN	HK3
Circadian Rhythm Signaling	0	0.0303	NaN	GRINA
Synaptic Long Term Potentiation	0	0.0873	2.111	RAP1B,RAP2B,PPP1R3D,Calm1 (includes others),PDIA3,PRKCD,PLCG2,PPP1CA,MAP2K1,RAP1A,GRINA
Axonal Guidance Signaling	0	0.0783	NaN	RAP2B,DPYSL2,RAP1B,RAC2,KLC1,TUBA1B,PFN1,PDIA3,MMP25,TUBB,BRCC3,EIF4E,ADAM8,TUBA8,MMP8,NTNG2,ADAM19,PSMD14,PLXNB2,MAP2K1,VASP,ACE,ITGA4,ITGB1,PXN,CFL1,ARPC5L,ADAM15,TUBB2A,L1CAM,RAP1A,GNG10,SEMA4D,TUBA1A,TUBB6,PLCG2,PRKCD,ADAM9,MMP9
Synaptic Long Term Depression	0	0.0538	2.333	RAP1B,RAP2B,PLBD1,PDIA3,PRKCD,PLCG2,LYN,MAP2K1,RAP1A,SLC39A7
FXR/RXR Activation	0	0.0873	NaN	PPARG,APOE,IL36G,C3,TF,SCARB1,CYP27A1,IL1RN,APOC2,PCYOX1,PLTP
TR/RXR Activation	0	0.08	NaN	F10,HP,SLC16A3,HDAC3,UCP2,SCARB1,GPS2,NCOA4
FcÎ³RIIB Signaling in B Lymphocytes	0	0.069	1.633	RAP1B,RAP2B,PLCG2,LYN,DOK1,RAP1A
CCR5 Signaling in Macrophages	0	0.0851	1.342	Calm1 (includes others),JUN,PRKCD,PLCG2,FCER1G,MAPK13,CD3D,GNG10
IL-3 Signaling	0	0.0778	2.646	RAP2B,RAP1B,JUN,PRKCD,STAT5B,MAP2K1,RAP1A
IL-17 Signaling	0	0.0753	NaN	RAP2B,RAP1B,JUN,MAPK13,NFKB1,MAP2K1,RAP1A
CXCR4 Signaling	0	0.0756	1.508	RAP1B,RAP2B,PXN,JUN,RND3,EGR1,PRKCD,LYN,ELMO2,ADCY7,MAP2K1,RAP1A,GNG10
CTLA4 Signaling in Cytotoxic T Lymphocytes	0	0.0693	NaN	B2M,AP2M1,AP1G2,HLA-A,CLTA,FCER1G,CD3D
IL-9 Signaling	0	0.0851	1	SOCS3,NFKB2,NFKB1,STAT5B
CCR3 Signaling in Eosinophils	0	0.0657	1.633	RAP1B,RAP2B,Calm1 (includes others),CFL1,PRKCD,MAPK13,MAP2K1,RAP1A,GNG10
Role of Cytokines in Mediating Communication between Immune Cells	0	0.037	NaN	IL36G,IL1RN
Reelin Signaling in Neurons	0	0.0532	NaN	ITGB1,APOE,LYN,MAP4K1,ITGA4
Melatonin Signaling	0	0.0694	2.236	Calm1 (includes others),PDIA3,PRKCD,PLCG2,MAP2K1
Cellular Effects of Sildenafil (Viagra)	0	0.0534	NaN	PDE2A,Calm1 (includes others),MYH9,ACTA2,PDIA3,PLCG2,ADCY7
Neuropathic Pain Signaling In Dorsal Horn Neurons	0	0.0427	0.447	CAMK1,PDIA3,PRKCD,PLCG2,GRINA
Endothelin-1 Signaling	0	0.0905	1.698	RAP2B,RAP1B,PDIA3,PTGS1,MAPK13,RAP1A,PLBD1,PLD4,CASP6,HMOX1,JUN,PLCG2,PRKCD,CASP1,EDNRA,ECE1,CASP8,ADCY7
Relaxin Signaling	0	0.0859	1.667	RAP1B,SMPDL3A,PDE2A,NFKB2,NFKB1,RAP1A,GNG10,JUN,NFKBIB,APEX1,ADCY7,MAP2K1,MMP9,SLC39A7
Factors Promoting Cardiogenesis in Vertebrates	0	0.0543	NaN	TGFBR2,PRKCD,MEF2C,LRP1,TCF7L2
Cardiomyocyte Differentiation via BMP Receptors	0	0.05	NaN	MEF2C
Docosahexaenoic Acid (DHA) Signaling	0	0.0741	NaN	BCL2L1,CYCS,BAX,BCL2A1
Thrombin Signaling	0	0.0711	2.138	RAP2B,RAP1B,CAMK1,PDIA3,NFKB2,MAPK13,NFKB1,RAP1A,GNG10,IKBKB,RND3,PRKCD,PLCG2,MAP2K1,ADCY7
Cardiac Hypertrophy Signaling	0	0.0868	3.13	RAP2B,RAP1B,Calm1 (includes others),PDIA3,MAP3K1,IL6R,MEF2A,MAPK13,EIF2B2,RAP1A,EIF4E,GNG10,TGFBR2,JUN,RND3,PLCG2,EIF2B1,MEF2C,MAP3K8,ADCY7,MAP2K1
Cell Cycle Regulation by BTG Family Proteins	0	0.0541	NaN	BTG2,CDK4
Role of CHK Proteins in Cell Cycle Checkpoint Control	0	0.0877	NaN	TP53,PCNA,CDKN1A,RPA1,RFC5
GNRH Signaling	0	0.0882	1.069	RAP2B,RAP1B,PXN,Calm1 (includes others),EGR1,MAP3K1,MAPK13,NFKB2,NFKB1,RAP1A,JUN,PRKCD,MAP3K8,MAP2K1,ADCY7
Human Embryonic Stem Cell Pluripotency	0	0.0345	NaN	TGFBR2,S1PR4,S1PR5,INHBA,TCF7L2
Melanocyte Development and Pigmentation Signaling	0	0.0667	2.646	RAP1B,RAP2B,PLCG2,RPS6KA4,ADCY7,MAP2K1,RAP1A
DNA Methylation and Transcriptional Repression Signaling	0	0.0882	NaN	HDAC1,MTA2,RBBP7
Antiproliferative Role of Somatostatin Receptor 2	0	0.0805	1.342	RAP2B,RAP1B,CDKN1A,RAP1A,MAP2K1,GNG10,SLC39A7
Role of NANOG in Mammalian Embryonic Stem Cell Pluripotency	0	0.0538	1.89	LIFR,RAP2B,RAP1B,TP53,TYK2,RAP1A,MAP2K1
Growth Hormone Signaling	0	0.0581	1.342	SOCS3,PRKCD,PLCG2,RPS6KA4,STAT5B
CREB Signaling in Neurons	0	0.0685	3	RAP2B,RAP1B,POLR2F,Calm1 (includes others),POLR2D,PDIA3,POLR2J,RAP1A,GNG10,POLR2C,POLR2E,PRKCD,PLCG2,MAP2K1,ADCY7
Renal Cell Carcinoma Signaling	0	0.0889	2.236	RAP2B,RAP1B,JUN,RPS27A,FH,UBC,MAP2K1,RAP1A
Endometrial Cancer Signaling	0	0.0833	1.342	RAP1B,RAP2B,TP53,CTNNA1,MAP2K1,RAP1A
Basal Cell Carcinoma Signaling	0	0.0278	NaN	TP53,TCF7L2
Primary Immunodeficiency Signaling	0	0.06	NaN	CD40,TNFRSF13B,CD3D
Cleavage and Polyadenylation of Pre-mRNA	0	0.0833	NaN	NUDT21
G Beta Gamma Signaling	0	0.0504	2.449	RAP1B,RAP2B,PRKCD,PLCG2,RAP1A,GNG10
G Protein Signaling Mediated by Tubby	0	0.0645	NaN	PLCG2,GNG10
Sphingosine-1-phosphate Signaling	0	0.0873	-0.333	S1PR4,CASP6,ACER3,RND3,S1PR5,PDIA3,PLCG2,CASP1,CASP8,ADCY7,ASAH1
ILK Signaling	0	0.0761	1.941	ITGB1,PXN,MYH9,FN1,CFL1,VIM,NFKB2,NFKB1,ITGB7,JUN,RND3,ACTA2,RPS6KA4,MMP9,NACA
Retinoic acid Mediated Apoptosis Signaling	0	0.0806	2.236	PARP2,CYCS,CASP8,IFNAR1,PARP1
AMPK Signaling	0	0.0502	-1.667	CCNA2,RAB27A,GYS1,EEF2,CDKN1A,SMARCB1,MAPK13,PFKL,MLST8,PPM1G,RAB6A
PAK Signaling	0	0.0734	1.89	RAP2B,RAP1B,ITGB1,PXN,CFL1,MAP2K1,RAP1A,ITGA4
Role of Osteoblasts, Osteoclasts and Chondrocytes in Rheumatoid Arthritis	0	0.0809	NaN	ITGB1,NAIP,Calm1 (includes others),CSNK1A1,GSN,NFKB1,CSF1R,IL18RAP,IL1R2,TRADD,IKBKB,IL36G,JUN,IL1RN,MMP8,TNFRSF1B,NFKBIB,LRP1,TCF7L2
Ovarian Cancer Signaling	0	0.0795	1.134	RAP1B,RAP2B,TP53,PA2G4,TFDP1,PTGS1,CDK4,EDNRA,MAP2K1,RAP1A,MMP9,TCF7L2
HER-2 Signaling in Breast Cancer	0	0.0833	NaN	RAP2B,RAP1B,ITGB1,TP53,PRKCD,CDKN1A,RAP1A,ITGB7
Leptin Signaling in Obesity	0	0.0568	NaN	SOCS3,PDIA3,PLCG2,MAP2K1,ADCY7
Glioma Invasiveness Signaling	0	0.0769	0.816	RAP1B,RAP2B,RND3,PLAUR,RAP1A,MMP9
Glioblastoma Multiforme Signaling	0	0.0647	1.897	RAP1B,RAP2B,TP53,RND3,PDIA3,PRKCD,PLCG2,CDKN1A,CDK4,MAP2K1,RAP1A
Role of Wnt/GSK-3Î² Signaling in the Pathogenesis of Influenza	0	0.0519	NaN	CSNK1A1,TCF7L2,IFNAR1,NCOA4
Role of Lipids/Lipid Rafts in the Pathogenesis of Influenza	0	0.087	NaN	FDPS,IFNAR1
Role of MAPK Signaling in the Pathogenesis of Influenza	0	0.0886	NaN	PLBD1,RAP2B,RAP1B,BAX,MAPK13,MAP2K1,RAP1A
Role of PI3K/AKT Signaling in the Pathogenesis of Influenza	0	0.075	1.342	NFKB2,NFKB1,NFKBIB,MAP2K1,PLAC8,IFNAR1
Role of Hypercytokinemia/hyperchemokinemia in the Pathogenesis of Influenza	0	0.0698	NaN	CCR1,IL36G,IL1RN
MSP-RON Signaling Pathway	0	0.0405	NaN	ITGAM,ACTA2,CCR2
DNA Double-Strand Break Repair by Homologous Recombination	0	0.0714	NaN	RPA1
Assembly of RNA Polymerase III Complex	0	0.0769	NaN	GTF3A
DNA Double-Strand Break Repair by Non-Homologous End Joining	0	0.0714	NaN	PARP1
IL-17A Signaling in Airway Cells	0	0.0875	1.134	IKBKB,TYK2,NFKB2,MAPK13,NFKB1,NFKBIB,MAP2K1
Role of IL-17A in Arthritis	0	0.0714	NaN	NFKB2,MAPK13,NFKB1,NFKBIB,MAP2K1
Role of IL-17F in Allergic Inflammatory Airway Diseases	0	0.0889	2	RPS6KA4,NFKB2,NFKB1,MAP2K1
Differential Regulation of Cytokine Production in Intestinal Epithelial Cells by IL-17A and IL-17F	0	0.0435	NaN	LCN2
Role of JAK1 and JAK3 in Î³c Cytokine Signaling	0	0.0641	NaN	RAP1B,RAP2B,SOCS3,STAT5B,RAP1A
Dopamine-DARPP32 Feedback in cAMP Signaling	0	0.0613	1.667	PPP1R3D,Calm1 (includes others),PDIA3,PRKCD,PLCG2,CSNK1A1,ATP2A3,PPP1CA,ADCY7,GRINA
Signaling by Rho Family GTPases	0	0.0714	2	ITGB1,SEPT5,SEPT9,CFL1,ARPC5L,VIM,NFKB2,NFKB1,SEPT1,GNG10,STMN1,JUN,ACTA2,RND3,MAP2K1,SEPT2,MSN,ITGA4
RhoGDI Signaling	0	0.0686	-0.905	ITGB1,GDI1,CFL1,ACTA2,RND3,ARPC5L,GDI2,ARHGDIA,ARHGDIB,GNG10,MSN,ITGA4
Gap Junction Signaling	0	0.0817	NaN	RAP2B,RAP1B,TUBA1B,PDIA3,TUBB2A,CSNK1A1,TUBB,RAP1A,TUBA1A,ACTA2,TUBB6,TUBA8,PLCG2,PRKCD,ADCY7,MAP2K1,SLC39A7
Telomere Extension by Telomerase	0	0.0667	NaN	HNRNPA2B1
Mouse Embryonic Stem Cell Pluripotency	0	0.0789	1.667	RAP1B,RAP2B,LIFR,TP53,TYK2,MAPK13,MAP2K1,RAP1A,TCF7L2
Hematopoiesis from Pluripotent Stem Cells	0	0.0408	NaN	FCER1G,CD3D
Transcriptional Regulatory Network in Embryonic Stem Cells	0	0.037	NaN	SET,L1CAM
nNOS Signaling in Skeletal Muscle Cells	0	0.0244	NaN	Calm1 (includes others)
VEGF Family Ligand-Receptor Interactions	0	0.0625	2.449	RAP1B,RAP2B,PRKCD,PLCG2,MAP2K1,RAP1A
Ephrin A Signaling	0	0.0323	NaN	CFL1,VAV1
ErbB Signaling	0	0.0755	2.121	RAP2B,RAP1B,JUN,PRKCD,PLCG2,MAPK13,MAP2K1,RAP1A
Netrin Signaling	0	0.0154	NaN	RAC2
Heparan Sulfate Biosynthesis	0	0.0843	-0.378	EXT2,TARS2,CHST12,CHST13,NDST1,CHST15,AARSD1
Retinoate Biosynthesis I	0	0.0882	NaN	DHRS3,DHRS9,RDH12
Thyroid Hormone Metabolism II (via Conjugation and/or Degradation)	0	0.0465	NaN	EXT2,Ugt1a7c
NAD biosynthesis II (from tryptophan)	0	0.0667	NaN	HAAO
Nicotine Degradation III	0	0.0357	NaN	EXT2,Ugt1a7c
Dopamine Degradation	0	0.0811	NaN	ALDH1B1,COMT,ALDH9A1
Ubiquinol-10 Biosynthesis (Eukaryotic)	0	0.0556	NaN	BCKDHA
Acyl-CoA Hydrolysis	0	0.0833	NaN	ACOT7
tRNA Splicing	0	0.0714	NaN	SMPDL3A,PDE2A,APEX1
Melatonin Degradation I	0	0.0308	NaN	EXT2,Ugt1a7c
D-myo-inositol (1,4,5)-Trisphosphate Biosynthesis	0	0.0741	NaN	PLD4,PLCG2
Phospholipases	0	0.0794	1.342	PLD4,PLBD1,HMOX1,PDIA3,PLCG2
Estrogen Biosynthesis	0	0.0732	NaN	HSD17B10,HSD17B12,HSD17B4
Chondroitin Sulfate Biosynthesis	0	0.0702	-2	CHST12,CHST13,NDST1,CHST15
Dermatan Sulfate Biosynthesis	0	0.0847	-1.342	CHST12,CHST13,NDST1,CHST15,DSE
1D-myo-inositol Hexakisphosphate Biosynthesis II (Mammalian)	0	0.0556	NaN	INPP5F
NAD Phosphorylation and Dephosphorylation	0	0.0769	NaN	Acp5
Glycogen Degradation II	0	0.0769	NaN	PYGL
Nicotine Degradation II	0	0.0308	NaN	EXT2,Ugt1a7c
Superpathway of D-myo-inositol (1,4,5)-trisphosphate Metabolism	0	0.087	NaN	MINPP1,INPP5F
Phenylalanine Degradation IV (Mammalian, via Side Chain)	0	0.0714	NaN	GOT2
D-myo-inositol (1,4,5)-trisphosphate Degradation	0	0.0588	NaN	INPP5F
Chondroitin Sulfate Biosynthesis (Late Stages)	0	0.0816	-2	CHST12,CHST13,NDST1,CHST15
Superpathway of Melatonin Degradation	0	0.0286	NaN	EXT2,Ugt1a7c
Acetone Degradation I (to Methylglyoxal)	0	0.0333	NaN	FAM213B
Superpathway of Methionine Degradation	0	0.0811	NaN	MAT2A,GOT2,AHCY
GÎ±i Signaling	0	0.082	-1.667	RAP1B,RAP2B,LTB4R,CXCR2,RGS10,FPR2,ADCY7,RAP1A,GNG10,FPR1
GÎ±s Signaling	0	0.0467	2	ADORA2B,MAP2K1,RAP1A,ADCY7,GNG10
Cysteine Biosynthesis III (mammalia)	0	0.0833	NaN	MAT2A,AHCY
Regulation of the Epithelial-Mesenchymal Transition Pathway	0	0.0761	NaN	RAP2B,RAP1B,EGR1,TYK2,NCSTN,NFKB2,NFKB1,RAP1A,TGFBR2,APH1A,ZEB2,MAP2K1,MMP9,TCF7L2,PSEN1
Role of p14/p19ARF in Tumor Suppression	0	0.0667	NaN	TP53,NPM1,NPM3
Sperm Motility	0	0.0547	0.816	PLBD1,SLC16A10,PDE2A,Calm1 (includes others),PDIA3,PRKCD,PLCG2
Tec Kinase Signaling	0	0.0877	2.673	ITGB1,TYK2,NFKB2,NFKB1,GNG10,STAT4,RND3,ACTA2,PLCG2,PRKCD,LYN,FCER1G,VAV1,STAT5B,ITGA4
UVB-Induced MAPK Signaling	0	0.0882	1.633	TP53,JUN,PRKCD,MAPK13,MAP2K1,EIF4E
Adipogenesis pathway	0	0.0896	NaN	PPARG,TP53,HDAC3,HDAC4,HAT1,AGPAT2,HDAC1,CEBPD,XBP1,RBBP7,STAT5B,BSCL2
PCP pathway	0	0.0492	NaN	JUN,PFN1,JUNB
Wnt/Ca+ pathway	0	0.0645	2	PDIA3,PLCG2,NFKB2,NFKB1
EGF Signaling	0	0.0571	1	JUN,MAP3K1,MAPK13,MAP2K1
Nitric Oxide Signaling in the Cardiovascular System	0	0.0696	2.646	HSP90B1,PDE2A,Calm1 (includes others),HSP90AB1,PRKCD,ATP2A3,ARG2,MAP2K1
Cardiac Î²-adrenergic Signaling	0	0.0714	0	SMPDL3A,PPP1R3D,PDE2A,AKAP8,ATP2A3,PPP1CA,ADCY7,APEX1,GNG10,PKIG
IL-2 Signaling	0	0.0833	2.236	RAP1B,RAP2B,JUN,STAT5B,MAP2K1,RAP1A
FGF Signaling	0	0.0326	NaN	MAP3K1,MAPK13,MAP2K1
GABA Receptor Signaling	0	0.0737	NaN	NSF,AP2M1,AP1G2,RPS27A,UBC,ADCY7,ALDH9A1
Wnt/Î²-catenin Signaling	0	0.0698	0.632	TGFBR2,TP53,JUN,HDAC1,CSNK1A1,RPS27A,RUVBL2,MAP4K1,SOX13,UBC,LRP1,TCF7L2
Serotonin Receptor Signaling	0	0.0698	NaN	SPR,ADCY7,QDPR
Insulin Receptor Signaling	0	0.0884	1.387	RAP1B,RAP2B,SOCS3,SGK1,EIF2B2,RAP1A,EIF4E,PPP1R3D,GYS1,INPP5F,EIF2B1,PPP1CA,MAP2K1
Phototransduction Pathway	0	0.0189	NaN	GNGT2
Neurotrophin/TRK Signaling	0	0.0595	2.236	RAP1B,RAP2B,JUN,MAP2K1,RAP1A
Sonic Hedgehog Signaling	0	0.0667	NaN	ARRB2,CCNB1
Dopamine Receptor Signaling	0	0.0779	NaN	PPP1R3D,COMT,SPR,PPP1CA,ADCY7,QDPR
cAMP-mediated signaling	0	0.0749	0	SMPDL3A,PDE2A,CAMK1,Calm1 (includes others),RGS18,AKAP8,FPR2,RAP1A,FPR1,LTB4R,CXCR2,RGS10,ADORA2B,ADCY7,MAP2K1,APEX1,PKIG
Glutamate Receptor Signaling	0	0.0526	NaN	Calm1 (includes others),SLC38A1,GRINA
G-Protein Coupled Receptor Signaling	0	0.0707	NaN	SMPDL3A,RAP2B,RAP1B,PDE2A,RGS18,FPR2,NFKB2,NFKB1,RAP1A,FPR1,IKBKB,LTB4R,CXCR2,RGS10,ADORA2B,MAP3K8,NFKBIB,ADCY7,MAP2K1,APEX1
GPCR-Mediated Integration of Enteroendocrine Signaling Exemplified by an L Cell	0	0.0411	NaN	PDIA3,PLCG2,ADCY7
GPCR-Mediated Nutrient Sensing in Enteroendocrine Cells	0	0.0625	1.89	PDIA3,PRKCD,PLCG2,LPAR5,ADCY7,GNG10,FFAR2
Gustation Pathway	0	0.0519	NaN	SMPDL3A,PDE2A,LPAR6,P2RX4,P2RY6,APEX1,ADCY7,P2RX7
GP6 Signaling Pathway	0	0.0444	2.449	RAP1B,Calm1 (includes others),PRKCD,PLCG2,FCER1G,LYN
IL-7 Signaling Pathway	0	0.0645	-0.816	JUN,CCND3,LYN,BAX,MAPK13,STAT5B
Opioid Signaling Pathway	0	0.0854	2.236	RAP2B,RAP1B,SIGMAR1,RAC2,AP2M1,CAMK1,Calm1 (includes others),RGS18,NFKB2,NFKB1,RAP1A,GRINA,ARRB2,AP1G2,PRKCD,CLTA,RGS10,LYN,RPS6KA4,ADCY7,MAP2K1
SPINK1 Pancreatic Cancer Pathway	0	0.05	NaN	TGFBR2,CTSA,CTSB
SPINK1 General Cancer Pathway	0	0.0732	2.449	RAP1B,RAP2B,TYK2,IL6R,MAP2K1,RAP1A
Endocannabinoid Developing Neuron Pathway	0	0.0703	0.333	RAP1B,RAP2B,RAC2,MGLL,MAPK13,ADCY7,MLST8,MAP2K1,RAP1A
Endocannabinoid Cancer Inhibition Pathway	0	0.0823	1.387	ATF3,VIM,MLST8,EIF2A,CASP6,CCND3,CDKN1A,NUPR1,CASP1,CASP8,MAP2K1,ADCY7,TCF7L2
Apelin Pancreas Signaling Pathway	0	0.0339	NaN	NFKB2,NFKB1
Apelin Cardiomyocyte Signaling Pathway	0	0.0522	0.816	PDIA3,PRKCD,PLCG2,CAT,ATP2A3,MAPK13
Apelin Muscle Signaling Pathway	0	0.0556	NaN	NRF1
Ephrin Receptor Signaling	0	0.0847	1.291	RAP2B,ITGB1,RAP1B,RAC2,PXN,CFL1,ARPC5L,SH2D3C,RAP1A,GNG10,GRINA,ABI1,DOK1,MAP2K1,ITGA4
