# Supplementary material for: Performativity and National Identity: Japan’s Domestic Policies
Source: Oxford University Press journal article supplement (doi:10.1158/2159-8290.cd-18-1393), 2007-01-01
Supplement: 21598290cd181393-sup-212867_2_supp_5481628_pq6jqy.xlsx [file 21598290cd181393-sup-212867_2_supp_5481628_pq6jqy.xlsx]

## Sheet: C2 vs C0,1,3,5
Supplementary Table 7a: Ingenuity Upstream Modulator Analysis of Cluster 2 Macrophages compared to Cluster 0, 1 and 3 Macrophages
Upstream Regulator	Expr Log Ratio	Molecule Type	Predicted Activation State	Activation z-score	Flags	p-value of overlap	Target molecules in dataset	Mechanistic Network
RICTOR		other	Inhibited	-12.256	bias	5e-109	Atp5e,ATP5F1A,ATP5F1B,ATP5F1C,ATP5F1D,ATP5MC1,ATP5MC2,ATP5MC3,ATP5MF,ATP5MG,ATP5PB,ATP5PD,ATP5PF,ATP5PO,ATP6V0B,ATP6V1A,ATP6V1B2,ATP6V1C1,ATP6V1H,BAX,BSG,COX4I1,COX5A,Cox5b,COX6A1,COX6B1,Cox6c,COX7A2,COX7A2L,COX7B,Cox7c,COX8A,CYC1,EGR1,FABP5,FAU,IFI16,Mx1,NDUFA1,NDUFA10,NDUFA2,NDUFA3,NDUFA4,NDUFA5,NDUFA6,NDUFA9,NDUFAB1,NDUFB10,NDUFB2,NDUFB3,NDUFB4,NDUFB5,NDUFB6,NDUFB8,NDUFB9,NDUFC1,NDUFC2,NDUFS2,…
TP53	0.415	transcription regulator		1.952		4.2e-58	ABCB8,ACAA2,ACADL,ACAT1,ACO2,ACSL1,ACTL6A,ADAM8,ADH5,ADORA2B,AEN,AHCY,AHSA1,AKR1B1,ALDH1B1,ALDH9A1,ALOX5,ANXA1,ANXA3,ANXA4,ANXA6,APEX1,API5,APOBEC1,ARL6IP1,ARRB2,ASF1B,ASS1,ATF3,ATP1A1,Atp5e,ATP5F1A,ATP5F1C,Atp5k,ATP5MC1,ATP5MC3,ATP5PB,AURKA,AURKB,BAX,BCAP31,BID,BIRC5,BTG1,BTG2,CALU,CAP1,CARHSP1,CASP1,CASP6,CASP8,CAT,Ccl2,CCNA2,CCNB1,CCNB2,CCND3,CCS,CD44,CD81,CD82,CDC16,CDC20,CDK4,CDKN1A,CDKN2D,C…	779 (19)
MYC	0.304	transcription regulator	Activated	7.207		4.69e-52	ABCD1,ABCF1,ACAT1,ADIPOR1,AHCY,AIMP2,ALOX5,ANXA4,ANXA5,ANXA6,APEX1,Arf2,ARHGAP25,ARL6IP1,ASPRV1,ASS1,ATP13A2,ATP5IF1,AURKB,BAX,BCL6,BIN1,BIRC5,C1QBP,CANX,CAPN2,CAPZB,CASP1,CASP8,Ccl6,CCNA2,CCNB1,CCNB2,CCND3,CCT3,CD44,CD48,CD9,CDC20,CDK4,CDKN1A,CEBPD,CEBPE,CHST15,CIAO2A,CLIC4,CNBP,CNP,COX6A1,COX6B1,COX7A2L,CRIP1,CSDE1,CSE1L,CSF1R,CSTB,CTNNA1,CTSB,CTSD,CTSV,CUL1,CYCS,CYFIP2,DBI,DCTPP1,DDX39B,DKC1,D…	960 (19)
CD 437		chemical drug	Inhibited	-7.639	bias	3.03e-51	AKR1B1,AP2M1,AP2S1,API5,ARHGDIB,ARL2,ATP5F1A,ATP5F1B,ATP5F1C,ATP5MC3,ATP5MG,ATP5PF,ATP5PO,BANF1,BAX,CCT2,CCT3,CCT6A,CDK4,CDKN1A,CLIC1,COX7A2,COX7A2L,COX7B,EEF2,EIF3D,EIF3G,EIF3I,EIF4A1,EIF4B,EIF5A,ENO1,ERH,FAS,FTL,GADD45A,HADHA,HSP90AA1,HSPA8,IMP3,JUN,KARS,KPNA2,LGALS1,LSM3,MGST1,MTCH2,MYC,NACA,NARS,NDUFB9,NME1,NOP10,NPM1,PABPC1,PCBP1,PDIA3,PFN1,PHYH,PLP2,PSMA4,PSMB1,PSMD3,RPL10,RPL11,RPL13,RPL13…	393 (10)
5-fluorouracil		chemical drug	Inhibited	-7.741		1.73e-50	AHSA1,ANXA4,ATP5F1B,ATP5F1C,ATP5PB,ATP5PO,BAX,BIRC5,BTF3,CALU,CANX,CCT3,CCT4,CCT6A,CD40,CDKN1A,COX6A1,COX6B1,COX8A,CSF1R,CSTB,CYCS,ECHS1,EEF1G,EEF2,EGR1,EIF2S2,EIF3C,EIF3E,EIF3G,EIF4A1,FAS,FBL,FDPS,FKBP1A,GARS,GOT2,GSN,HADHA,HNRNPA2B1,HSP90AB1,HSPA8,HSPE1,IDH2,IL1B,KARS,MAT2A,MDH1,MVP,MYC,NACA,NDUFA1,NDUFA4,NDUFS8,NDUFV2,NOP56,PCBP1,PGK1,PKM,PSMA6,PSMA7,PSMB1,PSMB2,PSMB5,PSMB7,PSMD2,PSME1,PSME2,P…	964 (22)
1,2-dithiol-3-thione		chemical reagent	Activated	8.16	bias	1.51e-46	ACAA1,ACSL5,ACTG1,AKR1A1,ATP1A1,B4GALNT1,CCT3,CCT7,CLPP,CLPTM1L,COPS5,COQ7,CREG1,CTSD,CUL1,DAD1,DDX39B,DNAJB11,DNAJC3,DSTN,EIF2S1,EIF3C,EIF3D,EIF3E,EIF3G,EIF6,ERP29,ESD,F10,GBE1,GSTM5,GSTP1,HAX1,HM13,HMBS,HPRT1,HSP90AA1,HSP90AB1,HSP90B1,LMNA,LY6E,M6PR,MGLL,MORF4L2,MRPS18B,NARS,P2RX4,PCBP1,PDIA3,PDIA4,PDIA6,PPIB,PRDX1,PSAT1,PSMA1,PSMA2,PSMA4,PSMA5,PSMA6,PSMA7,PSMB1,PSMB2,PSMB3,PSMB4,PSMB5,PSMB6,PS…	239 (5)
sirolimus		chemical drug	Inhibited	-8	bias	9.33e-46	ABHD11,ANXA5,ARHGDIB,ASS1,ATP1A1,ATP5F1C,ATP5MC1,ATP5MG,ATP6V0B,ATP6V1A,ATP6V1B2,B2M,BAX,BCKDHA,BID,BIRC5,Ccl2,CCND3,CD40,CD68,CDK4,CDKN1A,CLIC1,COX6A1,COX6B1,CREG1,CXCR4,CYCS,DAD1,DDT,DPP7,DPYSL2,EBI3,EEF1A1,EEF2,EGR1,EIF1AX,EIF2S1,EIF4A1,ENO1,ERCC1,FAS,FN1,FPR1,GSTP1,H3F3A/H3F3B,HIST1H4A,HSP90AA1,HSP90AB1,HSP90B1,HSPA4,HSPA5,HSPD1,ICAM1,IDH1,IL16,IL1B,JUNB,LCN2,LGALS3,LMNA,MAP1LC3B,MMP9,Mt1,MYC…	833 (19)
ST1926		chemical drug	Inhibited	-7.873	bias	2.45e-42	AKR1B1,AP2M1,AP2S1,ATP5F1A,ATP5F1B,ATP5PF,CCT2,CCT3,CCT6A,CDK4,CDKN1A,CFL1,CHCHD2,CLIC1,COX7A2,COX7A2L,COX7B,EEF2,EIF3D,EIF3E,EIF3G,EIF3I,EIF4A1,EIF4B,EIF5A,ENO1,H2AFZ,HSP90AA1,IMP3,KARS,KPNA2,LGALS1,LSM3,MGST1,MTCH2,NACA,NARS,NDUFB9,NME1,NOP10,NPM1,PABPC1,PDIA3,PFN1,PSMA4,PSMB1,PSMD3,RPL10,RPL13,RPL18A,RPL19,RPL24,RPL36AL,RPL39,RPL41,RPL6,RPL8,RPS10,RPS15,RPS2,RPS26,RPS27A,SKP1,SLC25A3,SLIRP,SNR…
HNF4A		transcription regulator		1.692		1.54e-39	ABCB8,ACAA2,ACAT1,ACO2,ACSL1,ADIPOR1,AHNAK,AHSA1,AIMP1,AKR1B1,ALDH2,ANXA5,AP3M1,APH1A,APIP,ARG2,ARL1,ASAH1,ASPRV1,ATF6B,ATG3,ATOX1,ATP5MD,ATP6V1H,AVPI1,BCCIP,BCKDHA,BCL6,BLOC1S1,BLVRB,BPHL,BTG1,C11orf58,C3,C9orf64,CAP1,CAPZA2,CAT,CBX3,CCDC115,CCDC59,CCNA2,CCNB1,CCT8,CD55,CDC123,CDK2AP2,CDK5RAP3,CDKN1A,CDKN2AIPNL,CEACAM1,CEBPD,CEP19,CETN3,CHCHD2,CHCHD3,CLDN1,CLTA,CNBP,COMMD9,COPB2,COPS7A,COPZ1,COX…	412 (2)
MYCN		transcription regulator	Activated	6.365		1.74e-39	ABCD1,ABCF1,ACTG1,APEX1,B2M,BAX,BID,BIRC5,CDKN1A,CKAP4,EEF1A1,EEF1D,EEF1G,EEF2,EIF3C,EIF4A1,EIF5A,FAU,FN1,HLA-A,HSP90AB1,HSPD1,INHBA,ITGB1,LGALS1,MAGT1,MYH9,MYL12A,NACA,NCAM1,NME1,NME2,NPM1,NUCB1,PDIA4,PHB,PHGDH,PSMA7,PSMB6,PSMB7,RBBP7,RFC3,RPL10,RPL11,RPL12,RPL13,RPL13A,RPL17,RPL18,RPL18A,RPL19,RPL21,RPL22,RPL23,RPL24,RPL26,RPL27,RPL27A,RPL28,RPL3,RPL30,RPL31,RPL35,RPL35A,RPL37,RPL37A,RPL38,RPL3…	709 (19)
NFE2L2		transcription regulator	Activated	7.269	bias	5.91e-39	Acp5,ACSL5,ACTG1,AKR1A1,ATF3,ATP1A1,B4GALNT1,Calm1 (includes others),CAT,Ccl2,CCT3,CCT7,CDKN1A,CLPP,CLPTM1L,COPS5,COQ7,COX4I1,CREG1,CS,CTSD,CUL1,CYBB,DAD1,DCTN3,DDX39B,DNAJB11,DNAJC3,DSTN,EIF2S1,EIF3C,EIF3E,EIF3G,ERP29,ESD,F10,FN1,FTL,GBE1,GPX1,GPX3,GSTM5,GSTO1,GSTP1,HAX1,HM13,HMBS,HPRT1,HSP90AA1,HSP90AB1,HSP90B1,HSPA9,IDH1,IFRD1,IL1B,IL1RN,IL36G,KEAP1,LMNA,LY6E,M6PR,MAFG,MAP1LC3B,MGLL,MGST1,MGST…	505 (16)
interferon beta-1a		biologic drug		-0.993		9.03e-35	ALG5,ATP5MC3,ATP5MG,BUB3,CCR2,CCT4,CCT6A,CD3D,COPS5,COX5A,COX6A1,CS,CSF1R,CXCR4,EEF1G,EIF2B1,ENO1,FCGR1A,FCGRT,FKBP1A,FPR1,GPR65,GSTP1,HLA-DRB5,IFI35,IL16,IL1RN,KARS,LGALS1,LTB,LTF,MMP9,MRPL20,MRPS18B,NDUFA1,NDUFA2,NDUFB2,NDUFB9,PGK1,PLAUR,PPIA,PSMB8,PSME1,RAE1,RAN,RPL18,RPL19,RPL22,RPL24,RPL26,RPL27,RPL27A,RPL3,RPL36AL,RPS19,RPS28,RPS7,S100A9,TBCB,TNFRSF1B,TNFSF13B,TRADD,TREX1,TTC1,UQCRFS1	282 (7)
MAPT		other		0.956		4.93e-33	ACO2,ACTG1,AIF1,ANXA5,ANXA6,ARF4,ATOX1,Atp5e,ATP5F1A,ATP5F1B,ATP5F1C,ATP5F1D,ATP5PD,ATP5PF,ATP6V1A,BSG,C1QBP,C3,CANX,CAP1,CAPN1,Ccl2,CCNB1,CDKN1A,CFL1,CKB,CLTA,COX4I1,COX5A,Cox6c,COX7A2,CS,CTSD,CYCS,CYFIP2,DBI,DPYSL2,DSTN,EEF1G,ENO1,FBL,FKBP1A,GAS7,GDI2,GLO1,GOT2,GSTM5,GSTP1,H2AFV,HINT1,HSP90AA1,HSPA1A/HSPA1B,HSPA5,HSPA8,HSPD1,HSPE1,IL1B,JUN,KLC1,MDH1,NDUFA5,NDUFS3,NDUFS6,NDUFS8,NFKB1,NFKB2,NME1,…	856 (20)
lipopolysaccharide		chemical drug		0.792	bias	8.22e-31	ACSL1,ADORA2B,ALDH2,ALOX5,ANKRD22,ANXA1,ANXA3,ANXA5,ANXA7,APEX1,API5,APOBEC1,Arf2,ARG2,ASS1,ATF3,ATP1A1,ATP2B1,ATP5MC1,AURKB,BATF,BAX,BCL6,BID,BTG1,C3,C3AR1,C5AR1,Calm1 (includes others),CALR,CAMP,CAPN2,CASP1,CASP8,Ccl2,Ccl9,CCNB1,CCNB2,CCND3,CCR1,CCR2,CCRL2,CD14,Cd24a,CD300LF,CD37,CD40,CD44,CD48,CD55,CD68,CD74,CD9,CDK4,CDKN1A,CEACAM1,CEBPD,CFB,CFP,CLDN1,CLEC4C,CLEC4E,CLEC5A,CLIC4,COX4I1,CREG1,CS…	625 (15)
STK11		kinase	Inhibited	-6.018	bias	2.09e-29	AHCY,AKR1A1,ALDH9A1,ASS1,ATF3,Atp5e,ATP5F1C,ATP5F1D,Atp5k,ATP5MC1,ATP5MC2,ATP5MC3,ATP5MF,BCL7B,BTF3,Ccl2,CCNA2,CCT6A,CDKN1A,COX5A,Cox5b,COX6A1,COX6B1,COX7A2,Cox7c,COX8A,CS,CSF3R,CTSD,CYC1,DCTPP1,EIF3A,ENO1,ENOPH1,FN1,GADD45A,GOT2,GPI,IMPDH2,JUNB,LTB,MMP9,MRPS10,MRPS15,MYC,NDUFA10,NDUFA13,NDUFA2,NDUFA3,NDUFA4,NDUFA9,NDUFB11,NDUFB9,NDUFC2,NDUFS7,NDUFS8,NDUFV1,NFKB2,NME2,NT5E,PDE2A,PGK1,PHGDH,PKM,PN…	993 (27)
IL3		cytokine		1.615	bias	5.29e-29	AKR1A1,ALDH2,ARHGDIB,BTG2,Calm1 (includes others),CALR,CAPZB,CAT,Ccl6,CCND3,CCT5,CD14,CD3D,CD40,CD48,CD63,CDKN1A,CLEC4C,CSF1R,CSNK1A1,CXCR4,DAD1,EEF1A1,EGR1,EIF1AX,EIF3G,EMP3,FAS,FKBP3,GADD45A,GPX1,HLA-A,HNRNPA2B1,HSP90B1,HSPA5,HSPA9,ICAM1,IK,IL1B,IMPDH2,ITGAM,ITGB7,JUN,JUNB,KLF13,LCN2,LY75,LY9,MCM5,Mt1,MYC,NACA,NARS,NCF1,NRP1,OSM,PFKL,PHGDH,PLA2G7,PPM1G,PPP5C,PSMA5,PSMB3,PSMB7,PSMC4,PSME1,RAN,RA…	462 (17)
arsenic trioxide		chemical drug		1.319		6.16e-28	ACAT2,ARL6IP1,ATP1B3,ATP2B1,ATP5F1D,ATP5MC2,ATP5MC3,ATP5PB,ATP6V0B,ATP6V1A,ATP6V1C1,AURKA,BAX,BCAP31,BLVRA,BLVRB,CALR,CASP8,CD44,CDKN1A,CEBPE,CNBP,COPB2,COX6B1,COX7A2,COX7A2L,COX7B,CST3,CYC1,DHX15,DNAJB11,EBP,ERP29,FAIM,FAS,FDPS,FN1,GLRX,H2AFX,HAT1,HSP90AB1,HSP90B1,HSPA5,HSPA8,HSPE1,IFRD1,ITGAM,ITGB1,KDELR1,KEAP1,LMAN2,MCM3,MCM7,MMP9,MYC,NCF1,NDUFA1,NDUFA12,NDUFA13,NDUFA2,NDUFA4,NDUFA6,NDUFB2,NDU…	760 (22)
imatinib		chemical drug	Inhibited	-3.112		2.1e-27	ARL6IP1,ATP1B3,ATP2B1,ATP5F1D,ATP5MC2,ATP5MC3,ATP5PB,ATP6V0B,ATP6V1A,ATP6V1C1,AURKA,BAX,BCAP31,BIRC5,CALR,CAPN1,CASP8,Ccl9,CCNA2,CCNB1,CDKN1A,CEBPE,CNBP,COPB2,COX6B1,COX7A2,COX7A2L,COX7B,CXCR4,CYBB,CYC1,DHX15,DNAJB11,EIF4B,ERP29,FAIM,FN1,HAT1,HSP90AB1,HSP90B1,HSPA5,HSPA8,HSPE1,IFRD1,IL1B,ITGA1,ITGAM,KDELR1,LMAN2,MCM3,MCM7,MYC,NDUFA1,NDUFA12,NDUFA13,NDUFA2,NDUFA4,NDUFA6,NDUFB2,NDUFB5,NDUFB6,NDUFB8…	758 (21)
Hbb-b1		transporter	Activated	4.93	bias	2.7e-27	ATP5F1C,ATP5MC1,ATP5MC2,ATP5MF,ATP5PO,Ccl2,CCR2,CD44,CD74,CMTM3,COX19,Cox6c,COX8A,CXCR2,CYBB,CYC1,FN1,FTL,HFE,ICAM1,IL10RA,IL16,IL1B,ITGAM,LTB,LY86,Mt1,NDUFA13,NDUFA3,NDUFA4,NDUFA5,NDUFA6,NDUFA9,NDUFB11,NDUFB4,NDUFB8,NDUFB9,NDUFC1,NDUFS3,NDUFS7,NDUFS8,NDUFV1,NDUFV2,SDHA,SURF1,TF,UCP2,UQCRC1,UQCRC2,VCAM1	524 (15)
ciprofloxacin		chemical drug		-0.339		8.12e-26	ACAA1,ACO2,ACSL5,ADAM8,ALDH2,ALDH3B1,ASAH1,ATP5F1A,ATP5F1C,ATP6V1A,ATP6V1B2,ATP6V1C1,ATP6V1H,B4GALNT1,CCR1,CD40,CD68,CTSA,CTSD,CTSV,DNAJC3,EMILIN2,GBA,GLUD1,GRN,GUSB,HLA-A,HSPA9,HSPD1,ICAM1,ITGAL,ITM2C,LGMN,LRPAP1,MPEG1,MPP1,MSR1,MYBBP1A,NRP1,PLXNB2,PSAP,RPL10A,RPL12,Rpl34 (includes others),RPL7A,RPS18,RUVBL1,SHMT2,TEX264,TMPO,TUFM,VDAC1,VIM	254 (7)
torin1		chemical reagent	Inhibited	-6.037	bias	2.02e-25	ALDH1B1,ALDH9A1,ATP5F1B,ATP5MC1,ATP5MF,ATP5MG,ATP5PB,ATP5PD,ATP5PF,ATP6V0B,ATP6V1C1,CCND3,COX4I1,COX5A,COX6B1,COX7A2,COX7B,COX8A,CYC1,ENO1,GPI,NDUFA1,NDUFA2,NDUFA3,NDUFA6,NDUFA9,NDUFAB1,NDUFB10,NDUFB2,NDUFB3,NDUFB8,NDUFC1,NDUFC2,NDUFS2,NDUFS7,NDUFS8,PDHA1,PDHB,PFKL,PGK1,PKM,PPA1,RPS20,RPS6,SDHB,TCIRG1,TPI1,UQCR10,UQCRFS1	566 (7)
dexamethasone		chemical drug		-1.625		1e-24	ACADL,ACAT1,ACOT7,Acp5,ACSL1,ACTG1,ADAM15,ADAM9,ALDH1B1,ALOX5,ANXA1,ANXA3,ARG2,ARHGAP17,ARHGAP25,ARHGDIA,ARRB2,ASF1B,ATF3,ATP1A1,ATP2B1,ATP6V1B2,ATP6V1C1,B2M,BATF,BAX,BCAT2,BCKDHA,BCL6,BIRC5,BLVRB,BSCL2,BSG,BTG1,BTG2,C3,C3AR1,C5AR1,Calm1 (includes others),CALR,CAMP,CANX,CAPN1,CASP6,CAT,Ccl2,CCNA2,CCND3,CCR1,CCR2,CCT2,CD177,CD3D,CD40,CD44,CD48,CD55,CD74,CDK4,CDKN1A,CDV3,CEACAM1,CEBPD,CFB,CFL1,CHIT…	794 (18)
pirinixic acid		chemical toxicant	Activated	4.794	bias	1.06e-24	ACAA1,ACAA2,ACADL,ACAT1,ACAT2,ACSL1,ACSL5,ADIPOR1,ALDH9A1,ANXA7,AP3M1,BAX,BSG,C3,CAT,Ccl2,CCNA2,CCNB1,CCND3,CCT3,CCT6A,CCT7,Cd24a,CD63,CDK4,CDKN1A,CEACAM1,CFH,CTSB,CYP27A1,DAD1,DBI,ECI1,EIF3E,ETFDH,FABP5,FAS,FEN1,FKBP1A,G0S2,GADD45A,GBE1,GOT2,HADH,HADHA,HADHB,HIST1H1C,HLA-DQA1,HLA-E,HMGN1,Hmgn2 (includes others),HSD17B10,HSD17B4,HSP90AA1,Hspa1b,HSPD1,HSPE1,IFITM3,IL1B,IL1RN,INSIG1,IRF8,ITGAM,JUNB…	830 (19)
D-glucose		chemical - endogenous mammalian		-0.832		5.4e-23	ACAA1,ACAA2,ACADL,ACO2,ACSL1,ADIPOR1,AKR1B1,ANXA1,ANXA3,ARF4,ASS1,ATF3,ATP2B1,Atp5e,ATP5MC2,BAX,BIRC5,C3,CALR,CANX,CAP1,CAPZA1,CAPZA2,CAT,Ccl2,CCNB1,CCND3,CCPG1,CD55,CDK4,CDKN1A,CDT1,CSF1R,CTSB,CTSV,CXCR4,CYBB,DBI,DNAJA2,DNAJB11,DNAJC3,DUSP1,EGR1,EIF2A,EMC10,ENO1,FABP5,FAS,FKBP2,FN1,GPI,GRN,GSN,HK3,HNRNPK,HP,HPRT1,Hspa1b,HSPA5,HSPD1,ICAM1,IDH1,IER2,Ifi27l2a/Ifi27l2b,IL1B,INHBA,ITGA1,ITGB1,JUN,JUN…	621 (18)
TCR		complex	Activated	4.022	bias	1.13e-22	ABCD1,ATP5F1B,ATP5PB,ATP5PD,BATF,BIN1,BSG,CCND3,CCR1,CCR2,CD44,CS,CTSB,CXCR4,CYTIP,DKC1,EGR1,EIF4E,ENO1,F5,FAS,FBL,GLUD1,HADH,HSD17B10,HSP90B1,HSPA5,HSPA9,HSPD1,IDH2,IFNAR1,IFNGR1,IL16,ITGB7,JUN,JUNB,LAMP1,LIPA,LSM3,MDH1,MYC,NDUFA10,NFKB1,NFKB2,NHP2,NME1,NOP58,NRP1,OAS1,P2RX7,P4HB,PA2G4,PDCD4,PDIA4,PGK1,PHB,PHB2,PRELID1,PXN,REL,RELB,RPL10A,RPL13A,RPL15,RPL17,RPL18A,RPL22,RPL3,RPL30,RPL31,RPL38,RP…	578 (14)
INSR		kinase	Activated	6.603	bias	1.65e-22	ACAA2,ACADL,ACO2,ACSL1,ACSL5,ALDH2,ARHGDIA,ATF3,ATP5F1A,ATP5F1B,ATP5F1D,ATP5MC1,ATP5MC3,ATP5MF,ATP5MG,ATP5PD,ATP5PF,ATP5PO,BIRC5,Calm1 (includes others),CASP6,Ccl2,CDKN1A,CFL1,COX4I1,Cox5b,CS,CSTB,CTSB,CTSV,CXCR4,CYC1,CYCS,DEK,DUSP1,ECHS1,ECI1,EGR1,ETFA,ETFB,ETFDH,FDPS,FEN1,FH,GADD45A,GOT2,GRN,HADHA,HADHB,HSD17B10,HSD17B4,HSPD1,IDH1,IDH3A,IER2,Ifi202b,IFITM2,IFNAR2,IL1B,IQGAP1,JUNB,KLF10,LAT2,LCP…	918 (22)
HBA1/HBA2		transporter	Activated	5.209	bias	1.76e-22	ATP5F1C,ATP5MC1,ATP5MC2,ATP5MF,ATP5PO,COX19,Cox6c,COX8A,CYC1,Mt1,NDUFA13,NDUFA3,NDUFA4,NDUFA5,NDUFA6,NDUFA9,NDUFB11,NDUFB4,NDUFB8,NDUFB9,NDUFC1,NDUFS3,NDUFS7,NDUFS8,NDUFV1,NDUFV2,SDHA,SURF1,UCP2,UQCRC1,UQCRC2
tretinoin		chemical - endogenous mammalian	Inhibited	-2.091		4.29e-22	Acp5,ACSL1,AHNAK,AIMP1,AKR1A1,ALDH9A1,ALOX5,ANXA1,ANXA5,ANXA6,APEX1,ATP1B3,ATP6V1B2,AURKA,BCL6,BID,BIRC5,BTG1,BTG2,C3,C3AR1,C5AR1,Calm1 (includes others),CALR,CAPN2,CASP1,CASP6,Ccl2,CCNA2,CCNB1,CCND3,CCPG1,CCR1,CCRL2,CCT5,CD101,CD14,CD44,CD63,CD68,CD74,CD82,CD9,CDC20,CDK4,CDKN1A,CDKN2D,CDKN3,CEACAM1,CEBPE,CFP,CLDN1,CREG1,CSE1L,CSF1R,CSF3R,CSNK1A1,CTSB,CTSC,CTSD,CTSS,CX3CR1,CXCR4,CYBB,CYP4F2,DAD1,…	698 (19)
PSEN1		peptidase		-0.861		5.99e-22	ACO2,ACSL1,ACTG1,ARF4,ATOX1,Atp5e,ATP5F1A,ATP5F1B,ATP5F1C,ATP5F1D,ATP5PD,ATP5PF,ATP6V1A,BAX,BSG,C1QBP,C3,C3AR1,CANX,CAP1,CCS,CD74,CD9,CFL1,CKB,CLTA,Cox6c,COX7A2,COX8A,CS,CTSC,CTSD,CTSS,CTSZ,CYCS,CYFIP2,CYTIP,DBI,DHRS7,DPYSL2,DSTN,DUSP1,EEF1G,EGR1,EMP1,ENO1,Erdr1,FAM32A,FBL,FKBP1A,GDI2,GOT2,GSTP1,H2AFV,HINT1,HLA-E,HSP90AA1,HSPA5,HSPA8,HSPD1,HSPE1,IL1B,IRF5,MMP9,MSR1,MYC,NCAM1,NDUFA5,NDUFS6,NME1,NU…	937 (24)
E2F1		transcription regulator		1.711	bias	7.45e-22	ACADL,ACSL5,ALG5,ATP5MC1,AURKA,AURKB,BAX,BID,BIRC5,BUB3,Calm1 (includes others),CALR,CASP6,CASP8,CCNA2,CCNB1,CCNB2,CCND3,CCT2,CCT4,CD44,CD9,CDC20,CDCA4,CDK4,CDKN1A,CDKN2D,CKB,CLIC1,COX4I1,COX5A,Cox7c,CSDE1,CSE1L,CTSB,DDX1,DDX39B,DUSP1,EGR1,EIF3I,ERH,FAS,FEN1,FKBP3,GM2A,GMNN,GPS2,HADHA,HIST2H2AA3/HIST2H2AA4,HMGN1,Hmgn2 (includes others),HNRNPK,HNRNPR,HSP90B1,Hspa1b,HSPA8,HSPD1,HSPE1,ICAM1,IDH3A,If…	668 (16)
IFNG		cytokine	Activated	3.414	bias	1.21e-21	ADORA2B,AHCY,AIF1,AMER2,ARG2,ARL6IP5,ASS1,ATF3,ATG3,ATP1A1,B2M,BAX,BID,Bst2,BTG1,C3,C5AR1,CASP1,CASP6,CASP8,CAT,Ccl2,Ccl6,Ccl9,CCNA2,CCND3,CCR1,CCR2,CCRL2,CD14,Cd24a,CD40,CD44,CD55,CD63,CD68,CD74,CDK4,CDKN1A,CEACAM1,CEBPD,CFB,CFP,CLEC10A,CLEC4E,CLEC5A,CLIC4,CSE1L,CSF1R,CTSB,CTSC,CTSD,CTSH,CTSS,CTSV,CTSZ,CX3CR1,CXCR4,Cyb5r3,CYBB,CYP27A1,DDB1,DDX60,DOK1,DUSP1,EBI3,ECE1,EDNRA,EEF1A1,EGR1,ENO1,FABP5,…	566 (15)
methylprednisolone		chemical drug		1.339		1.21e-21	ACSL1,AHCY,Akr1c12/Akr1c13,ANXA1,ANXA3,AP2A2,APEX1,ASAH1,ASS1,ATP1A1,ATP5F1C,ATP5IF1,B2M,B4GALNT1,BTG1,C1QBP,Calm1 (includes others),CAMK1,Ccl2,CCT6A,Cd24a,CD44,CD74,CD9,CDKN1A,CNP,COMT,COX6A1,CREG1,CST3,CTSC,CTSH,CTSS,CTSV,Cyb5r3,CYBB,CYC1,CYCS,DHRS9,DUSP1,ECE1,EMP1,FABP5,FARSA,FGL2,FGR,FKBP4,FN1,G0S2,GADD45A,GATM,GDA,GLUD1,GSTP1,HAAO,HMBS,HSD17B10,HSD17B12,HSD3B7,HSP90B1,HSPA1A/HSPA1B,IDH1,IDH2…	799 (20)
TCL1A		transcription regulator	Inhibited	-2.135	bias	2.89e-21	Acp5,APOBEC1,C3AR1,CAMP,CCR1,CD68,CFP,CLEC4E,CSF3R,CTSB,CTSC,CTSD,CTSH,CTSS,CXCR2,CYBB,FPR1,GUSB,IGSF6,IL1B,IL1R2,ITGAM,ITGB2,LCN2,LTF,Ly6a (includes others),LY9,MAFB,MMP8,MMP9,MPEG1,MSR1,NEU1,Ngp,PTPRO,Retnlg,S100A8,S100A9,SCARB2,SLC11A1,SLC40A1,Srgn,TREM2	623 (12)
RRP1B		transcription regulator				3.44e-21	AURKA,BIRC5,CCNA2,CCNB2,CCND3,CDC20,CDKN1A,CDKN2D,EIF3H,EIF4B,FEN1,GADD45A,HAT1,HSP90AA1,HSP90AB1,ITGB2,MCM2,MCM3,MCM5,MCM6,PCNA,PLK1,PRKCD,RARA,RPA1,RPL11,RPL13,RPL13A,RPL14,RPL19,RPL22,RPL27,RPL37,RPL37A,RPL39,RPL6,Rplp1 (includes others),RPS10,RPS14,RPS19,RPS26,Rps27/Rps27rt,RPS3,RPS5,RPS8,RPS9,TOP2A,TUBG1
mono-(2-ethylhexyl)phthalate		chemical toxicant	Activated	4.03	bias	1.24e-20	ACADL,ACAT2,ACO2,ACSL1,APOBEC1,ATP5F1B,ATP5F1D,ATP5PB,BAX,BSCL2,CDK4,COX4I1,COX6A1,COX7A2,CS,CYC1,DGAT1,DGAT2,ECHS1,ENO1,FAS,FH,GPI,HADH,HADHA,IDH3A,IDH3G,IER2,IL1B,JUNB,MDH1,NDUFA10,NDUFA2,NDUFB5,NDUFB9,NDUFS2,NDUFS7,NDUFV1,NDUFV2,NFKB1,OGDH,PDHB,PGK1,PPA1,SDHA,SDHB,SDHC,SDHD,SOD1,SS18,SUCLG1,TALDO1,TKT,TPI1,TSPO,UQCRC1,UQCRC2,UQCRFS1,UQCRHL	750 (17)
mibolerone		chemical drug	Activated	3.846		1.65e-20	ACSL1,AHNAK,ARF4,CALR,CALU,CD74,CEACAM1,CLTA,DAD1,DBI,DHRS3,DNAJB11,EIF2S1,EIF4A1,ERP29,FDPS,FKBP1A,GMNN,GOT2,HLA-DQA1,HLA-E,HSP90B1,HSPA5,IDH3G,IFNGR1,INCENP,ISYNA1,JUN,KLF10,LRG1,MAT2A,MYC,NANS,NME1,NME2,P4HB,PCNA,PGK1,PPIA,PPIB,Rrbp1,SEC23B,SLC25A5,SMPDL3A,SQLE,SRM,STMN1,TF,TGFBI,TK1,TOP2A,TUBA1A,UCP2
KRAS		enzyme		1.273		1.97e-20	AEN,AHNAK,AIMP2,APLP2,ATF3,B2M,BIRC5,BSG,CAMK1,CASP1,Ccl2,CCNA2,CCNB1,CCND3,CCT5,CD44,CD74,CDKN1A,CDT1,CEACAM1,CLEC10A,CS,CSE1L,DPYSL2,DUSP1,EEF1A1,EGR1,EIF4E,EIF5A,ENO1,ENOPH1,EXOSC5,FAS,FN1,GADD45A,GBA,GMNN,GRN,GSN,HADHB,HEXA,HOPX,HSPA5,HSPE1,IFITM2,IFITM3,IKBKB,IL1B,IVNS1ABP,JUN,JUNB,KIF22,LAMP1,LAMP2,LCN2,LGALS3,Ly6a (includes others),MAP1LC3B,MAP2K1,MID1IP1,MMP9,MYC,NCAM1,NDE1,NFKB1,NFKB2,NF…	791 (21)
PTEN		phosphatase		0.004		3.71e-20	ABCA9,ABTB1,ACAA1,ACAA2,ACO2,ACSL1,ALG3,ANXA1,ARF4,ARHGDIA,ATF3,ATP5MC1,AURKA,AURKB,BAX,BIRC5,BTG1,BTG2,C3,Ccl2,CCNB1,CCNB2,CCND3,CD40,CDC20,CDK4,CDKN1A,CDKN2D,CKS1B,COX5A,COX8A,CS,CTNNBL1,CTSB,CTSV,CTSZ,CX3CR1,CXCR4,CYP27A1,DUSP1,EBP,FAM213B,FAS,G0S2,G3BP1,GPX3,GYS1,H2AFY,HADH,HADHA,HADHB,HLA-DMA,HMGN1,HSPA1A/HSPA1B,IDH2,IDH3A,IDH3B,IDH3G,IFI30,IFRD1,IL1B,LEPROT,LGALS3,LIMS1,LRRFIP1,MAT2A,MDH1,M…	891 (23)
XBP1	0.659	transcription regulator	Activated	5.976	bias	5.79e-20	ARCN1,ATF6B,BFAR,CALR,CAT,Ccl2,COPB2,COPE,COPG1,COPZ1,DAD1,DDOST,DERL1,DNAJB11,DNAJC3,ERP29,ERP44,FAS,FKBP1B,FKBP2,FN1,GORASP2,GOSR2,HDAC3,HM13,HSP90B1,HSPA5,ICAM1,KDELR2,KLF4,LMAN1,LMAN2,MAP1LC3B,MGAT2,MYC,NCF1,PDIA3,PDIA4,PDIA6,PPIB,RABAC1,RPN1,RPN2,Rrbp1,S100A6,SDF2L1,SEC11A,SEC23B,SEC31A,SEC61A1,SEC61B,SEC61G,SOD1,SPCS2,SPCS3,SRP9,SSR1,SSR2,SSR3,SSR4,SURF4,TRAM1,TXN,TXNDC5,VCAM1,XBP1,YIF1A	457 (14)
KDM5A		transcription regulator	Inhibited	-6.581	bias	6.15e-20	ACO2,ATP1A1,ATP5F1A,Atp5k,BCKDHA,CD55,CHCHD3,COA3,COQ7,COX14,COX4I1,COX6A1,COX6B1,COX7A2,DNAJC11,GHITM,IDH3B,ITGB1,MCM2,MCM3,MDH1,MRPL12,MSTO1,NDUFA10,NDUFA13,NDUFA2,NDUFA3,NDUFA4,NDUFA5,NDUFA6,NDUFA9,NDUFB10,NDUFB8,NDUFS2,NDUFS7,NDUFV1,NME1,PARK7,PGD,PMPCB,SDHB,SDHC,SDHD,TIMM50,TOMM6,Tpm1,TXN2,UQCRC1,UQCRFS1,UQCRQ,VDAC1	362 (7)
CD3		complex	Activated	5.53	bias	8.5e-20	AIMP1,ANXA1,ARHGDIB,ATP5F1C,BATF,BCL6,BIRC5,BTG1,BZW1,CASP6,CASP8,CCND3,CCR1,CCR2,CD44,CD74,CDK4,CEACAM1,CKS1B,COPB2,COX5A,CS,CXCR4,CYC1,CYCS,DAD1,DDT,DHRS4,DUSP22,EBI3,EBP,EIF4A3,EIF4E,EXOSC8,FAS,FBL,FDPS,FKBP1A,FKBP2,FKBP3,FTL,GDI2,GYS1,H2AFY,HAT1,HAX1,HINT1,HIST2H2AA3/HIST2H2AA4,HLA-DQB1,HMGN1,HNRNPA2B1,HNRNPF,HNRNPR,HSP90AA1,HSP90B1,HSPA1A/HSPA1B,HSPA5,HSPA8,HSPE1,ICAM1,IFI35,IFNGR1,IL16,IL1B…	668 (18)
ERBB2		kinase	Activated	3.929	bias	3.07e-19	ACAA2,ADAM8,AHNAK,AIMP2,APLP2,ATP1B3,ATP6V1A,AURKA,BCAT2,BIRC5,BTG2,CAPZA2,CCNA2,CCNB1,CCNB2,CCND3,CD82,CD9,CDC16,CDC20,CDC37,CDC42SE1,CDCA3,CDCA4,CDCA8,CDKN1A,CDKN3,CDT1,CENPA,CHMP2B,CKS1B,CRIP1,CSE1L,CSF1R,CTSB,CUL1,DAP,DERL1,DGAT1,DHRS7,DOK1,EBP,EGR1,EIF6,EMP1,EMP3,EPSTI1,ETFB,FEN1,FEZ2,FN1,FRRS1,G3BP1,GBE1,GINS2,GLO1,GPAA1,GPX3,GTF3A,HADHB,HNRNPK,HP,HSPA1A/HSPA1B,IDH1,IKBKB,IL1B,IL6R,ITGB1,JU…	812 (24)
APP		other		1.728		3.6e-19	ACO2,ACTG1,AIF1,ANXA5,ANXA6,APH1A,APLP2,ARF4,ARL6IP5,ASCC1,ATOX1,Atp5e,ATP5F1A,ATP5F1B,ATP5F1C,ATP5F1D,ATP5PD,ATP5PF,ATP6V1A,BAX,BSG,C1QBP,C3,CALR,CANX,CAP1,CAPN1,CAT,Ccl2,CD40,CD44,CD68,CD74,CD82,CDC37,CDK4,CFL1,CKB,CLDN1,CLIC1,CLTA,COX4I1,COX5A,Cox6c,COX7A2,CRYL1,CS,CSF1R,CTSB,CTSD,CTSV,CXCR2,CXCR4,CYBB,CYCS,CYFIP2,DBI,DPYSL2,DSTN,EEF1G,EGR1,ENO1,FAM49A,FBL,FCGR1A,FKBP1A,FN1,GDI2,GOT2,GPI,GSTP1…	763 (16)
RB1		transcription regulator	Activated	2.708		4.33e-19	ACO2,ALG5,ASF1B,ATP1A1,ATP5F1A,Atp5k,AURKB,BAX,BCKDHA,BIRC5,CASP6,CASP8,CCNA2,CCNB1,CCND3,CDCA4,CDKN1A,CDT1,CHCHD3,COA3,COQ7,COX14,COX4I1,COX6A1,COX6B1,COX7A2,DCK,DEK,DNAJC11,EDNRA,EGR1,FAS,FEN1,FN1,GHITM,GMNN,GPS2,H1F0,IDH3B,Ifi202b,MCM2,MCM3,MCM5,MCM6,MCM7,MDH1,MRPL12,MSTO1,MYC,NDUFA10,NDUFA13,NDUFA2,NDUFA3,NDUFA4,NDUFA5,NDUFA6,NDUFA9,NDUFB10,NDUFB8,NDUFS2,NDUFS7,NDUFV1,NFKB2,NME1,OGT,PARK7,PAR…	686 (17)
beta-estradiol		chemical - endogenous mammalian	Activated	4.989		2.54e-18	ACAA1,ACAA2,ACSL1,ACTL6A,AIF1,ANXA1,ANXA3,ANXA4,APEX1,ARRB2,ATF3,ATP2B1,ATP5F1B,ATP5PB,AURKA,BATF,BAX,BCL6,BID,BIN1,BIRC5,BSG,BTG1,BTG2,BUB3,C3,CALR,Ccl2,CCNA2,CCNB1,CCNB2,CCND3,CCR1,CCR2,CCT2,CD14,CD40,CD44,CD55,CD74,CDC123,CDC20,CDKN1A,CDT1,CEBPD,CENPM,CFB,CKB,CKS1B,CLDN1,Clec2d (includes others),CLIC4,CNBP,CNN2,CNP,COMT,COX5A,CSE1L,CSF3R,CSTB,CTSB,CTSD,CTSH,CXCR4,CYBB,CYCS,CYTH4,DDOST,DERL1,DH…	948 (21)
LONP1		peptidase	Inhibited	-2.906	bias	3.16e-18	ACAT1,ATP5F1A,ATP5F1D,ATP5IF1,ATP5PF,C1QBP,CALU,CHCHD3,COX5A,COX8A,ECI1,ECSIT,ETFB,GARS,GLUD1,HIST1H2BC,HNRNPA2B1,HSPA9,HSPD1,HSPE1,IDH3A,IMMT,MRPL18,MRPS22,P4HB,PDIA3,PFN1,SARS,SOD1,TRAP1,TUFM,UQCRFS1,VDAC1,VDAC2
filgrastim		biologic drug	Inhibited	-4.003		1.65e-17	ACSL1,ADAM15,ALOX5,ANXA1,ANXA3,ARHGAP25,ASF1B,ATF3,ATP1A1,ATP6V1C1,B2M,BATF,BTG2,CCND3,CCT2,CD177,CD44,CD48,CD55,CD74,CEACAM1,CHIT1,CLEC5A,CSF1R,CST3,CXCR4,CYBB,CYP27A1,CYSLTR1,DHRS9,ELMO2,EMILIN2,ENO1,EPSTI1,ERLIN1,F5,FABP5,FGL2,G0S2,GADD45A,GNGT2,GNS,GOLIM4,GPR183,GRINA,HLA-DMB,HLA-DQB1,HLA-DRB5,HP,HSPA9,IL18RAP,IL1R2,ITGAM,ITGB7,JUN,LAP3,LGALS3,LPAR6,LTB4R,LY75,MCM7,MMP8,MMP9,MPEG1,MS4A3,MS4A6…
calcitriol		chemical drug	Inhibited	-4.665		7.35e-17	AAAS,ACAT2,Acp5,ACSL1,ALOX5,ATP2B1,ATP5F1D,BATF,BAX,BIRC5,C15orf48,C3,CAMP,CCNA2,CCNB1,CCND3,CD14,CD40,CDC20,CDCA8,CDKN1A,CDT1,CEBPD,CENPA,CENPM,Clec2d (includes others),COMT,COQ9,CSE1L,CSF1R,DCTPP1,DUSP1,EGR1,ETFB,EXOSC8,FAS,FDPS,FEN1,FN1,GADD45A,GLRX,GLUD1,H2AFZ,HDAC1,Hmgn2 (includes others),HSD17B4,HSPA9,HSPD1,IDH1,IDH2,IL10RA,IL1B,IL1RN,INCENP,ITGAM,ITGB7,JUN,KIF20A,KIF22,KIF23,KLF4,KPNA2,LAM…	841 (18)
CSF2		cytokine		1.772	bias	4.05e-16	ADAM8,ADORA2B,AKR1A1,ALOX5,ANXA1,AURKA,BAX,BID,BIRC5,BSG,C3,C5AR1,CASP1,Ccl2,CCNA2,CCNB1,CCND3,CCR1,CD14,CD180,CD40,CD63,CD74,CDC123,CDC20,CDCA3,CDCA8,CDKN1A,CEACAM1,CFH,CKS1B,CLEC4C,CSF1R,CTSC,CXCR4,CYBB,EGR1,FAS,FCGR1A,FFAR2,FPR2,HDAC3,HDC,HLA-DQB1,HSPD1,ICAM1,IFITM3,IK,IL16,IL1B,IL1RN,ILF3,INHBA,IRF5,ITGAM,LAMP2,LCP1,LTB,LY75,LY9,LY96,MAT2A,MCM3,MCM5,MCM6,MMP9,MYC,NACA,NCAPH,NDST1,NFKB1,NFKB2,…	592 (16)
TNF		cytokine		-0.464		5.14e-16	Acp5,ACSL1,ADAM8,ADORA2B,AIMP1,AKR1B1,ALDH2,ALOX5,ANXA1,ANXA11,ARF4,ARHGDIB,ARL6IP5,ASS1,ATF3,ATP1A1,ATP2B1,ATP5PF,B2M,B4GALNT1,BAX,BCKDHA,BCL6,BID,BIRC5,BLVRA,BTG1,BTG2,C3,C3AR1,C5AR1,CALR,CASP1,CASP6,CASP8,CAT,Ccl2,Ccl6,Ccl9,CCND3,CCR1,CCR2,CD14,CD40,CD44,CD55,CD82,CDK4,CDKN1A,CEBPD,CFB,CLEC4E,CLEC5A,CLIC4,CMIP,CNP,CRCP,CRISPLD2,CSF1R,CTSB,CTSC,CTSS,CTSZ,CX3CR1,CXCR2,CXCR4,CYBB,CYP27A1,CYTIP,DB…	548 (16)
gentamicin		chemical drug	Activated	2.852		1.6e-15	ACAA1,APEX1,ATF3,BAX,BTG2,CALR,CAPZA1,Ccl2,CD9,CTSD,CTSV,DDX39A,DNAJA2,EEF1A1,EGR1,EIF2B2,EIF3D,ETFDH,GADD45A,GATM,GSTM5,GUK1,H2AFX,H3F3A/H3F3B,HSD17B4,HSP90AA1,HSP90B1,HSPA1A/HSPA1B,HSPA5,ICAM1,IDH1,IFRD1,IL1B,JUN,JUNB,KTI12,LCN2,LITAF,MCM6,MRPL23,MYBBP1A,MYC,MYO1G,NME1,NOP58,NPM1,NUDC,PDIA4,PFDN2,PHGDH,PRPS1,PSAT1,PSMB8,PTBP1,RGCC,RNF4,RPS27L,RUVBL1,S100A1,SSB,TARS,TP53,TUBB,VCAM1,YWHAH,ZFP36L1	267 (7)
metribolone		chemical reagent	Activated	5.308	bias	2.34e-15	ADRM1,AKNA,ALDH1B1,ALDH9A1,ARL6IP1,ATP5F1B,ATP5MC1,ATP5MF,ATP5MG,ATP5PB,ATP5PD,ATP5PF,ATP6V0B,ATP6V1C1,B2M,BAX,CCNA2,CCT2,CDKN1A,COX4I1,COX5A,COX6B1,COX7A2,COX7B,COX8A,CXCR4,CYC1,EGR1,ENO1,FDPS,FPR1,GPI,HSPA5,IFITM2,MGLL,MYC,NDUFA1,NDUFA2,NDUFA3,NDUFA6,NDUFA9,NDUFAB1,NDUFB10,NDUFB2,NDUFB3,NDUFB8,NDUFC1,NDUFC2,NDUFS2,NDUFS7,NDUFS8,PDHA1,PDHB,PFKL,PGK1,PHYH,PKM,PPA1,PPIB,PRKCD,PROS1,RAB27A,RAD23A,S…	751 (21)
cardiotoxin		chemical - other		1.633	bias	2.64e-15	ACSL5,APRT,ATP6V1A,B2M,BIRC5,C5AR1,CASP1,Ccl2,Ccl6,Ccl9,CCNA2,CCND3,CCR1,CCR2,CD180,CSF1R,CSF3R,CTSV,CXCR4,FBL,FEN1,GM2A,GMNN,HSP90AA1,HSPA5,IL10RA,IL13RA1,IL1B,IL1RN,IL6R,ITGB2,ITGB7,KARS,KPNA2,LRRFIP1,LY86,MCM2,MCM3,MCM7,MYH9,NPM1,OSTF1,PCNA,RANBP1,RPSA,SNRPD1,SNX5,TNFRSF1B,UCP2
POLG		enzyme				2.85e-15	COX7A2L,EEF1B2,EIF3H,RPL13,RPL14,RPL23,RPL27A,Rpl32,Rpl36a,RPL5,RPL7,RPS16,RPS19,RPS24,RPS25,RPS27A,RPS5,TPT1,USE1
IL4		cytokine	Activated	4.12	bias	3.97e-15	Acp5,ACSL1,ACTG1,ADORA2B,ADRM1,AHNAK,ALDH2,ALG3,ALOX5,ANXA1,ANXA4,ANXA6,APH1A,APRT,ARG2,ASS1,ATP5MD,B4GALNT1,BANF1,BAX,BCAT2,BCL6,BIN1,BIRC5,C3,C5AR1,CAPG,CASP6,CAT,CBX3,Ccl2,Ccl6,CCND3,CCT3,CD14,Cd24a,CD300LF,CD40,CD44,CD55,CD74,CDKN1A,CLEC10A,CLEC4C,CRIP1,CSF1R,CSF3R,CTNNA1,CTSC,CXCR4,CYSLTR1,EIF2S1,EIF3G,EIF4A1,F13A1,FAS,FBL,FN1,FPR2,GATM,GBE1,H1F0,HDAC1,HLA-DMA,HSD11B1,HSPA1A/HSPA1B,ICAM1,IER…	592 (15)
IL5		cytokine		1.596	bias	5.86e-15	ACAA2,ANXA6,ASS1,BCL6,CCND3,CCR1,CCR2,CCRL2,CD40,CD55,CD63,CD9,CDC123,CDKN1A,CEACAM1,CHST12,CISD1,CKAP4,CRELD2,CRIP1,CSF3R,CTSC,CX3CR1,CXCR2,CXCR4,CYSLTR1,EBP,EGR1,ENO1,FAS,FGL2,GADD45A,HSP90B1,HSPA5,ICAM1,IER2,IFI30,IL13RA1,IL18BP,IL1R2,IL6R,ITGAM,ITGB7,LTB,MANF,MAT2A,MMP9,MTDH,MYC,NACA,PDIA6,PDLIM1,PKM,PPIF,PPP5C,PRDX4,PSAT1,PSMB4,RBM3,RPN1,S100A4,S100A6,SDF2L1,SLC16A3,SLC1A5,SNAP23,SPCS2,SRI,T…	774 (18)
CSF3		cytokine	Inhibited	-2.644		6.67e-15	ARHGDIA,BATF,BAX,BIRC5,C3AR1,CAPG,Ccl2,CCND3,CD14,CD177,CD300LF,CD44,CDK4,CEBPE,CSF3R,CST3,CTSD,CX3CR1,CXCR2,CXCR4,CYBB,EGR1,FCGR1A,FPR1,GADD45A,GPR183,HDC,HLA-DQA1,HSPD1,ICAM1,IK,IL1RN,ITGAM,ITGB2,JUN,LCN2,LTB,LTF,Ly6a (includes others),LY96,MMP8,MMP9,MYC,NME2,PLSCR1,PROK2,PRTN3,RAB27A,RARA,TNFRSF1A,TNFRSF1B,TP53,VCAM1	530 (16)
KITLG		growth factor		-0.28	bias	7.24e-15	AIF1,ALOX5,ATP6V1B2,B2M,BIRC5,BLVRB,BTG1,CASP1,Ccl2,CCNA2,CCND3,CD14,Cd24a,CD3D,CD68,CDKN1A,CLIC1,CREG1,CSF3R,CXCR4,EEF1A1,EGR1,FABP5,HNRNPF,Ifi27l2a/Ifi27l2b,IK,IL16,IL1B,IL1RN,KPNA2,LAPTM5,LTF,LY6E,MAP2K1,MID1IP1,NPM1,OSM,PDCD4,PGLS,PKM,PLSCR1,PRTN3,PSMB5,PTGES3,RBBP7,RPL7,RPLP0,RPS23,Rps3a1,RPS6,RPS7,SDHC,SLC44A2,SNAP23,Snrpg,Srgn,TNFRSF1A,TPT1,TSC22D3,TXNIP,TXNL1,UCP2,ZNF207	705 (17)
2-amino-1-methyl-6-phenylimidazo-4-5-b-pyridine		chemical toxicant	Activated	4.596	bias	8.86e-15	BAX,CCT2,CCT4,CCT5,CCT7,CCT8,CDK4,G3BP1,HSP90AA1,HSPA5,HSPA8,HSPD1,HSPE1,PSMA2,PSMA6,PSMB1,PSMB2,PSMB4,PSMB9,PSME1,RAC2,RAN,RAP1A,SUMO1,UBA1
KLF3		transcription regulator	Inhibited	-2.138		9.09e-15	ABCF1,ADPGK,AHNAK,ALDH3B1,ANXA5,ANXA6,APRT,BCAP29,BLOC1S1,C11orf24,CAPG,CARHSP1,CCT3,CD55,CDKN2D,CFP,CTNNA1,CTSC,Cyb5r3,DHRS7,DOK3,EIF2B1,EIF5A,ELOF1,FAM49A,FCGRT,GAPT,GNGT2,GSTP1,HBP1,HIST1H2BI,HM13,HNRNPF,HYPK,IDH1,INTS4,ITGB7,LY96,MAP1S,MGST2,MIF,MRPL14,MRPL3,MSTO1,MTCH2,NSMCE1,NSUN2,PCYOX1,PDLIM1,POP5,PPM1G,PSMB2,PSMC5,PSMD7,PTP4A2,RASSF1,RAVER1,REEP5,RNF167,Rpl29 (includes others),RPP21,RUVB…
tunicamycin		chemical - endogenous non-mammalian	Activated	4.451	bias	1.2e-14	ARF4,ATF3,CALR,CANX,Ccl2,CCND3,CDKN1A,CEBPD,DGAT1,DGAT2,DNAJB11,DNAJC3,EGR1,EIF2A,EIF2S1,HSD11B1,HSP90B1,HSPA5,HSPA9,ICAM1,IFRD1,IL1B,KLF4,LMAN1,LMAN2,LMF1,MANF,MMP9,MORF4L2,MTDH,MVD,MYC,NARS,P4HB,PADI4,PCNA,PDIA6,PDRG1,PROM1,S100A4,SDF2L1,SEC11A,SEC61A1,SEC61G,SERINC3,SIGMAR1,SLC35B1,SMARCB1,SPCS2,SSR3,SURF4,TBCB,TP53,TXNIP,VCAM1,WARS,XBP1	466 (16)
benzyloxycarbonyl-Leu-Leu-Leu aldehyde		chemical - protease inhibitor	Activated	2.864	bias	1.92e-14	AKR1B1,ARHGDIB,ATF3,ATP1A1,BAX,BIRC5,CAT,Ccl2,CCND3,CCT2,CDK4,CDKN1A,CDT1,CFB,CFL1,CLIC1,CTSB,DUSP1,EIF4E,EIF5A,FAS,G0S2,GSTP1,HDAC1,HNRNPA2B1,HSP90AA1,HSP90B1,HSPA4,HSPA5,HSPA8,HSPA9,HSPD1,ICAM1,IKBKB,IL1B,ITGB1,JUN,LMAN1,MAT2A,MMP9,MRTO4,MYC,NCF1,NEDD8,NFKB2,PARP1,PDCD4,PEBP1,PFN1,PPIA,PSMA3,PSMB3,PSMC1,PSMC4,PSMD1,PSMD12,PSMD13,PSMD2,PSMD6,PXN,RANBP1,RANGAP1,RPLP0,RPLP2,RRM1,SOD1,STMN1,SUB1,TP…	748 (19)
PPARA		ligand-dependent nuclear receptor		1.84		2.22e-14	ACAA1,ACAA2,ACADL,ACAT1,ACAT2,ACSL1,ACSL5,AHCY,ALDH2,ALDH9A1,ANAPC5,APEX1,ARHGDIA,ASS1,ATP5F1B,AURKA,BAX,C3,CAT,Ccl2,CCNA2,CCNB1,Cd24a,CD63,CDK4,CDKN1A,CDS2,CEACAM1,CEBPD,CFH,Clec2d (includes others),COX4I1,CS,CYBB,CYCS,CYP27A1,DBI,ECI1,ETHE1,FABP5,FDPS,G0S2,GLUD1,GOT2,GSTP1,H2AFX,H2AFZ,HADH,HADHA,HADHB,HIST1H1C,HLA-DQA1,HLA-E,HMGN1,Hmgn2 (includes others),HSD17B10,HSD17B4,IFITM3,IL1B,IL1RN,INSIG…	652 (15)
IND S1		chemical - kinase inhibitor		-1.698		5.36e-14	ATP5F1B,ATP5F1D,C1QBP,CFL1,COX5A,ENO1,ETFA,FH,HSPA1A/HSPA1B,PDIA3,PGK1,PRDX1,PRDX2,PSMA1,STIP1,TUBB,VDAC2
genistein		chemical drug	Activated	3.531		7.1e-14	ABCA9,ALOX5,ARSG,ASAH1,ATP5PO,ATP6V0B,ATP6V1A,ATP6V1C1,ATP6V1H,BAX,BIRC5,C16orf54,C3,CAT,Ccl2,CCNB1,CCNB2,CCR2,CD44,CD68,CD74,CDKN1A,CHST12,CTSA,CTSB,CTSD,CTSH,CTSV,CX3CR1,CXCR2,CYP4F2,DNASE2,DUSP1,EVI2A,GBA,GM2A,GNS,GUSB,HCST,HDAC3,HEXA,HLA-A,HLA-DQA1,HSPA1A/HSPA1B,HSPA5,ICAM1,IKBKB,IL1B,ITGB2,JUN,JUNB,LAMP1,LAPTM5,LGMN,LIPA,LTF,LY86,M6PR,MAP3K1,MAP4K1,MCOLN1,MMP9,Mt1,MYC,NAGPA,NAPSA,NEU1,NFKB1,…	466 (17)
IND S7		chemical - kinase inhibitor	Inhibited	-2.065		8.41e-14	ATP5F1B,ATP5F1D,C1QBP,CALU,COX5A,ENO1,ERP29,ETFA,FH,GLUD1,HSPA1A/HSPA1B,PDIA3,PGK1,PRDX2,PSMA1,STIP1,TUBB,VDAC2,VIM
valproic acid		chemical drug	Inhibited	-3.537		8.85e-14	ADRM1,AKR1B1,ATF3,BIRC5,Bmyc,CACYBP,CALR,CASP8,CAT,CCR1,CD40,CD44,CDC123,CDKN1A,CDS2,CENPM,CKS1B,CRYL1,CTSB,CXCR4,DBI,DNAJB11,DNAJC3,DPM2,EIF2S1,FAS,FDPS,HDAC3,HSD3B7,HSPA5,ICAM1,ITM2C,JUN,MCM3,MCM6,MGAT2,MVD,NAA10,NCAM1,NME1,NPC2,PDIA6,PLTP,PMM2,POMP,PRKCD,PSMA1,PSMA2,PSMA3,PSMA4,PSMA5,PSMA6,PSMA7,PSMB1,PSMB10,PSMB2,PSMB3,PSMB4,PSMB5,PSMB6,PSMB7,PSMB8,PSMB9,PSMC1,PSMC2,PSMC3,PSMC4,PSMC5,PSMC6,PS…	964 (20)
PC-SPES		chemical drug				1.28e-13	ALOX5,ANXA1,B2M,CCNA2,CD9,CDC20,CDKN1A,CKS1B,CTNNA1,DAD1,DCK,DCTN3,DSTN,FTL,GARS,GPI,HSD17B4,HSP90AA1,HSPA5,IL1B,MCM2,MCM5,MGST1,OGT,P4HB,PA2G4,PEA15,PPP1R15A,RAN,SCARB1,SDHA,SELENBP1,TUBB2A,TXN,UBE2C,VIM
TGFB1		growth factor		1.005		1.4e-13	ABCD1,ABCF1,ACAA2,Acp5,ADI1,ADORA2B,AHNAK,ALDH2,ALOX5,AMER2,ANXA11,ARF4,ASS1,B2M,BAX,BCL6,BIN1,BIRC5,BSG,BTG1,C3,C3AR1,C5AR1,Calm1 (includes others),CAMP,CAP1,CAPRIN1,CASP1,CASP8,CAT,Ccl2,CCNA2,CCNB1,CCNB2,CCND3,CCR1,CCR2,CCRL2,CCT2,CCT5,CCT6A,CD14,CD40,CD44,CD55,CD68,CDC20,CDC42SE1,CDK4,CDKN1A,CDKN3,CDT1,CEACAM1,CENPA,CFB,CFH,CFL1,CKS1B,Clec2d (includes others),CLIC4,CNN2,CORO1C,COX5A,CSF1R,CST3…	901 (18)
DYSF		other				1.7e-13	ACTG1,ANXA1,B2M,CD48,Cd52,CD55,CD68,CD74,CORO1C,CTSH,CTSS,CTSV,EVI2A,FN1,FTL,GPR65,HLA-A,HLA-DQA1,HLA-DQB1,HLA-DRB5,HSPA1A/HSPA1B,IDH3A,IFI16,Ifi202b,ITGB1,LCP1,LGALS3,MPEG1,PROS1,PSAP,S100A4,TMEM123
MEL S3		chemical - kinase inhibitor	Inhibited	-2.982		2.22e-13	ATP5F1B,ATP5F1D,C1QBP,CALU,COX5A,EGR1,ENO1,ERP29,ETFA,FH,GLUD1,HSPA1A/HSPA1B,PGK1,PRDX2,PSMA1,STIP1,TUBB,VDAC2,VIM
HRAS		enzyme		0.885		2.76e-13	ACTG1,ANXA3,ANXA6,ATP5F1B,ATP5PF,AURKA,AURKB,B2M,BAX,BIRC5,BTG2,CALU,CAPG,CAPN2,Ccl2,CCNA2,CCNB1,CCND3,CD44,CD81,CDK4,CDKN1A,CDKN2D,CEBPD,CFB,CFH,CHST12,CNN2,COPB2,CTSB,CTSC,CTSS,CTSV,CTSZ,DOK1,DUSP1,EGR1,EIF3C,EIF4E2,ERCC1,ERP29,FAS,FN1,GPX3,GRN,GSN,GUSB,HDC,HNRNPA2B1,HSP90AA1,HSPA8,ICAM1,Ifi202b,IFI30,IFITM2,IL13RA1,IL1B,ITGAM,ITGB1,JUN,JUNB,LASP1,LXN,MMP9,MRPL12,MSRB1,MYC,MYL12A,NOP58,NPM1,NRP…	868 (24)
IL15		cytokine		0.404	bias	3.13e-13	ANXA1,ARHGDIB,BTG1,Ccl2,CCND3,CCR1,CCR2,CD40,CD44,CD55,CD74,CDK4,CDKN1A,CEACAM1,CKS1B,COPB2,CX3CR1,CXCR4,DDT,DHRS4,EBP,EIF4E,ENO1,EXOSC8,FAS,FKBP1A,GARS,GDI2,GPI,H2AFY,HAT1,HCST,HIST2H2AA3/HIST2H2AA4,HNRNPA2B1,HNRNPF,HSPA8,HSPE1,IFI35,IL18RAP,ITGB1,ITGB7,JUN,JUNB,Klrk1,MAP2K1,MCM5,MIF,MTA2,MYC,NAGA,NCAM1,NFKB1,NME1,PA2G4,PAFAH1B3,PCNA,PDCD4,PDCD5,PDIA3,PDIA4,PFKL,PFN1,PGD,PGK1,PGM2,PKM,PNP,PRDX4,…	546 (17)
mir-21		microRNA	Inhibited	-3.684	bias	3.56e-13	AIF1,ARCN1,ARF4,ARL6IP1,BTG2,CACYBP,CANX,CCNA2,CCNB1,CCT8,CD180,CDKN1A,CLEC5A,COPG1,CSE1L,CSF3R,FAS,FCGR1A,FGL2,FN1,H2AFX,HNRNPA2B1,ICAM1,IFI16,Ifi47,IL1B,IL36G,IL6R,KIF23,Klrk1,LTB,MIS18A,MMP9,MYC,NLRP3,NME1,NMT1,OAS3,Orm1 (includes others),PDCD4,PILRB,POLR2F,PPA1,PSME2,RACGAP1,SEPT2,SESN1,SIRPB1,SLC16A10,Slfn2,SLPI,SOCS6,SRSF3,SSR1,STMN1,STRAP,SUMO1,TACC3,TMEM97,TOP2A,TP53,TREM2,UBE2A,VCAM1,VRK…	735 (19)
VEGFA		growth factor	Activated	3.156	bias	3.74e-13	ACSL1,ADAM15,ADH5,ALDH2,ARG2,ATP5MC2,ATP5MC3,ATP5MF,ATP5PO,BATF,BAX,BCAT2,BIRC5,Ccl2,Ccl9,CCRL2,CD40,CD55,CD68,CDKN1A,CEACAM1,CLIC4,COX6B1,COX8A,CST3,CSTB,CTSB,CTSS,CTSV,CXCR4,EGR1,ETFA,FN1,HLA-DQB1,HSPA5,ICAM1,IL1B,ITGA1,ITGB1,JUNB,KARS,LMNA,ME2,MMP9,MRPL23,MRPL3,MRPS12,MVP,NDUFA1,NME1,NME2,NRP1,PARP1,PCNA,PPA1,SDHB,SDHD,SET,SHMT2,SLC25A17,SLC25A5,Stfa1 (includes others),THBS1,TIMM13,TP53,TSPO,T…	507 (18)
IL2		cytokine		1.847	bias	4.07e-13	ADAM8,ANXA1,ARHGAP25,ARHGDIA,BAX,BCCIP,BCL6,C3,CAPG,CASP1,Ccl2,Ccl9,CCND3,CCR1,CCR2,CD3D,CD40,CD44,CD74,CD9,CDK4,CDKN1A,CEACAM1,CFP,CSF1R,CTSC,CX3CR1,CXCR4,CYCS,CYP27A1,CYSLTR1,CYTH4,CYTIP,DAP,DKC1,EMP1,FAS,FGL2,FPR2,GARS,Gm16894,GRN,HCST,HDAC1,HIST1H1C,HSP90B1,HSPA1A/HSPA1B,HSPA5,HSPD1,ICAM1,IFNGR1,IL10RA,IL18BP,IL18RAP,IL1B,IL1R2,ITGA1,ITGB1,ITGB7,JUN,KLF13,LAPTM5,LTB,LTB4R,Ly6a (includes other…	757 (15)
tetraethylammonium		chemical drug		-1.786		4.8e-13	ARHGDIA,ATP5PD,CBX3,GSTO1,HADHA,HSPA8,HSPA9,NDUFS8,PAFAH1B3,PARK7,PDIA3,PRDX3,PSMA6,PSMB4,RANBP1,RPLP0,SARS,SRI,SSR4,TBCB,TCP1,TPI1
FOXO3		transcription regulator		-1.043		5e-13	ANXA1,ANXA3,APEX1,AURKA,BAX,BCL6,BIRC5,BTG1,CASP8,CAT,CCNB1,CCNB2,CCND3,CDC20,CDCA8,CDK4,CDKN1A,CDKN3,CDT1,CERS5,CLDN1,CTSB,CTSV,CXCR4,EGR1,FABP5,FN1,GADD45A,GMNN,GPX1,GSTM5,HBP1,ICAM1,IMPDH2,INHBA,ITGAM,ITGB2,JUNB,LCN2,MAX,MBNL1,MCM2,MCM7,MMP9,Mt1,MXD1,MYC,NT5E,NUPR1,OPTN,PCNA,PDCD6IP,PLK1,PPP1R15A,PRCP,PRDX3,PRDX5,PRKCD,PTTG1,RTN3,RUVBL1,SESN1,SLC40A1,SOD1,TIPIN,TNFRSF1A,TNFRSF1B,TP53,TXN2,TXNI…	828 (25)
IGF1R		transmembrane receptor	Activated	3.016	bias	6.59e-13	ACSL1,ANXA3,ATP5F1A,ATP5F1B,ATP5F1D,ATP5MC1,ATP5MC3,ATP5MF,ATP5MG,ATP5PD,ATP5PF,ATP5PO,BAX,CALU,CAPG,Cd33,CD37,CD48,CD68,CDKN1A,COX4I1,Cox5b,CTSD,CYCS,EGR1,HADHA,HSPA5,IL16,IL1B,ITGAM,IVNS1ABP,KIF20A,LASP1,MYC,NDUFA1,NDUFA3,NDUFA4,NDUFA9,NDUFB4,NDUFB9,NDUFV2,NME1,PKM,PROM1,PSMC6,RACGAP1,RBBP7,RBM3,RPL10A,RPL24,RPL3,RPL35A,RPL37A,RPL7,RPL9,RPS21,RPS24,RPS26,S100A4,SF3B5,TGFBI,TP53,TXN,UQCRC1,UQCRC2	952 (24)
dihydrotestosterone		chemical - endogenous mammalian	Activated	2.11	bias	6.63e-13	ACO2,Acp5,ATP13A2,B2M,BAX,BCAP31,BTG2,CACYBP,CANX,CASP1,CASP8,CCNA2,CCNB1,CCND3,CCT3,CD63,CD74,CDC20,CDKN1A,CIAO2A,CYBB,DBI,DCTPP1,DPM3,EGR1,ENO1,FAM89B,FKBP4,FN1,FTL,G0S2,GLRX3,GPI,GPX3,GRN,GSN,GSTP1,HINT1,HLA-A,HMGN1,HSP90AA1,HSPA1A/HSPA1B,Ifi202b,ITGB1,JUN,LGALS1,LY6E,MCM5,MGLL,MMP9,Mt1,MYC,NCF1,NUCB1,PA2G4,PDCD4,PEA15,PFN1,PHB,PHGDH,POLDIP3,POLR2D,PREP,PROS1,RAB27A,RAD23A,RPL12,RPL19,RPL27,RP…	872 (21)
CST5		other		-1.917	bias	8.76e-13	ACAT2,ADRM1,AHNAK,ANXA3,ANXA5,ANXA6,BCAP31,BLOC1S1,BRIX1,C17orf49,CD44,CNBP,COPS7A,CTSB,DDT,DKC1,DNAJA3,DNAJB11,EEF1B2,EEF1D,EEF1G,EIF2B1,EIF2B2,EMP3,GDA,GEMIN7,HNRNPA2B1,IGBP1,INTS4,LIMD2,MALSU1,MAP1S,MAPK13,MRTO4,MVP,NDUFC2,NHP2,NOP10,NRP1,NT5E,NUDT16L1,PCBP1,PRDX1,PRDX2,PUF60,PUS1,RBM3,REEP5,RNASEH2B,RPF2,RSL1D1,RTN3,SLC9A3R2,SNAPIN,SSRP1,TBL3,TOMM40,TXN,VARS,VASP,VCAN,VDAC1,VDAC2,VIM,WDR3,WDR…
TSC2		other	Inhibited	-2.816	bias	1.16e-12	ANXA1,ATF3,ATP6V0B,ATP6V1A,ATP6V1B2,BAX,BIRC5,CASP1,Ccl2,CCND3,CD68,CDKN1A,CREG1,CRIP1,DPP7,EGR1,EMP3,FAM129A,GSN,HSPA5,IFITM3,LGALS3,Mt1,NEU1,PLP2,PSMA1,PSMB1,PSMB2,PSMB5,PSMC3,PSMD1,PSMD14,RASSF4,Rpl32,S100A6,SCPEP1,SMPDL3A,TMEM176A,TMEM176B,UCP2	545 (21)
PD98059		chemical - kinase inhibitor	Inhibited	-2.539	bias	2.48e-12	ACAT2,ACOT7,ADIPOR1,ANXA1,ATF3,BAX,BCL6,BIRC5,C3,CAMP,Ccl2,CCNA2,CCNB1,CCR1,CCR2,CD14,CD37,CD40,CD44,CD55,CD74,CDKN1A,CEBPD,CTSB,CTSH,CXCR4,CYCS,DHRS3,DUSP1,ECE1,EEF1A1,EGR1,EMP1,EMP3,ENO1,FAS,FN1,FPR2,GADD45A,GAS7,GPI,GRN,HADHB,HNRNPA2B1,HSPA5,ICAM1,IL1B,IL1RN,INSIG1,ITGAM,ITGB1,ITGB2,JUN,JUNB,KIF22,LAMP1,LAMP2,MAT2A,MGLL,MIF,MMP9,MSR1,MXD1,MYC,NOP56,OSM,PABPC1,PCNA,PLAUR,PNP,PPP1R15A,RAN,RETSAT…	660 (17)
nitrofurantoin		chemical drug	Activated	2.727		2.67e-12	ACAA1,ACTG1,ANXA5,APEX1,ASS1,BAX,BTG2,C3,CAPN2,CASP6,CAT,CST3,CTSB,CTSS,CTSV,DBI,EEF1A1,EIF4E,FAS,GADD45A,GSTP1,HSD17B4,HSPA5,IFRD1,IL1B,ITGB1,LGALS3,MAP2K1,Mt1,MYC,PCNA,PRDX1,PRDX2,RPL13,RPL13A,RPL27,RPL6,RPS8,RPS9,S100A10,SELENBP1,STMN1,TP53,TUBA1A,TUBB,TXN,VCAM1
EPO		cytokine		1.15	bias	2.69e-12	ABCA13,ATP6V1B2,B2M,BAX,BCL6,BLVRB,BTG1,CCND3,CDKN1A,CHIT1,CLIC1,CREG1,CTSZ,CUL1,CXCR4,EEF1A1,EGR1,FABP5,FAS,FPR1,GBA,H2AFY,H2AFZ,HK3,HMGN1,HNRNPF,Ifi27l2a/Ifi27l2b,ITGB1,JUN,JUNB,KPNA2,LAPTM5,LCP1,LY6E,MID1IP1,MYC,NACA,NPM1,NUPR1,OSM,PBXIP1,PCNA,PDCD4,PRKCD,RPL7,RPLP0,RPS23,Rps3a1,RPS4Y1,RPS6,RPS7,SDHC,SLC44A2,SNAP23,Snrpg,SOD1,Srgn,SSRP1,TF,TP53,TPI1,TPT1,TSC22D3,TSN,TXNIP,UCP2,XPC	754 (19)
CDKN1A	0.929	kinase	Inhibited	-2.474		2.76e-12	AIMP1,ARL6IP1,AURKA,AURKB,BAX,BIRC5,BUB3,CCNA2,CCNB1,CCND3,CDC20,CDK4,CDKN1A,CDKN3,CKS1B,CTSB,DSE,DUSP1,ECSIT,EDNRA,FAS,FN1,GRN,H2AFX,H2AFZ,HNRNPA2B1,HSPA1A/HSPA1B,HSPA5,IL1B,INHBA,ITGAM,KIF20A,KNSTRN,LGALS3,LGALS3BP,MCM2,MCM3,MCM6,MCM7,MMP9,MYC,NPM1,PARP2,PCNA,PHGDH,PLK1,PSAP,RACGAP1,RRM1,STMN1,TNFSF13,TOP2A,TP53,UBE2C,UHRF1,VIM	741 (22)
mir-223		microRNA	Inhibited	-2.112		3.22e-12	ABCA13,APOBEC1,ASPRV1,C15orf48,C5AR1,CD180,Cd33,Clec2d (includes others),Clec4b2,CLEC4E,EMP1,FGL2,Gm8615,GPR65,GSTM5,ICAM1,IFI16,Ifitm6,IL1B,IL1RN,Ly6a (includes others),LY96,MLKL,MMP25,MMP8,NLRP3,PADI4,PARP1,PRTN3,RASGRP4,RIPK3,S100A6,S100A9,SCARB1,SLC29A1,SLC39A1,SLC40A1,SOAT1,Stfa2/Stfa2l1,STMN1,TGFBI	319 (7)
PRL		cytokine	Activated	3.675	bias	3.23e-12	ANXA3,ANXA5,ATP5PD,B2M,BCL6,CAMK1,CAPN2,CCNB1,CCND3,CD40,CDK4,CDKN1A,CEBPD,COX4I1,CST3,CTSA,CTSB,CTSD,CTSH,CTSS,CTSV,DDX39B,ECM1,EGR1,ENO1,EPSTI1,FN1,HSPD1,IFI35,ITGA1,JUN,LY6E,MAFG,MGST1,MLKL,MYC,NFKB1,NUPR1,OAS1,OAS3,P4HB,PCNA,PDIA4,PDLIM4,PKIG,PLSCR1,PSME1,PSME2,RABAC1,RHOG,RNASE4,RPSA,SAMHD1,SCARB1,SHISA5,SND1,SOD1,TECR,Tmsb4x (includes others),TNFSF13B,TP53,TRIM14,TUBA1B,VIM,YWHAG	543 (19)
NFKBIA		transcription regulator		0.414		3.55e-12	ATP5MF,AURKB,BAX,BCCIP,BID,BTG2,C3,CAMP,CAPZA2,CASP8,Ccl2,Ccl9,CCNA2,CCNB1,CCR1,CD40,CD82,CDKN1A,CDKN2D,CEBPD,CKS1B,CTNNA1,CTSB,CTSZ,CXCR4,FAS,FCGRT,FN1,GADD45A,GATD3A/GATD3B,Gm21596/Hmgb1,GM2A,GPX3,GRN,GSTM5,HLA-A,Hnrnpa1,HPSE,HSPA5,HSPA8,ICAM1,IFI16,IL1B,IL1RN,ITGB1,JUN,JUNB,LCN2,LIN28A,LITAF,LY6E,MMP9,Mt1,MYC,NFKB1,NFKB2,NFKBIB,NLRP12,PARK7,PCNA,PDHA1,PDLIM1,PEA15,POLB,POLR2C,PTP4A2,RELB,RPL27…	613 (16)
bortezomib		chemical drug	Activated	3.806		4.49e-12	ASF1B,ATF3,BAX,BIRC5,CALR,CASP1,CASP8,Ccl2,Ccl9,CCNB1,CDK4,CDKN1A,CXCR4,FAS,GADD45A,HDAC1,HDAC3,HSP90AA1,HSP90B1,HSPA14,HSPA1A/HSPA1B,Hspa1b,HSPA5,HSPE1,ICAM1,IL1B,MAX,MYC,NFKB1,NSFL1C,PCNA,PPP1R15A,PSMA1,PSMA2,PSMA3,PSMA5,PSMA6,PSMA7,PSMB3,PSMB4,PSMB5,PSMB7,PSMC1,PSMC4,PSMC6,PSMD11,PSMD12,PSMD13,PSMD14,PSMD2,PSMD3,PSMD4,PSMD6,RAF1,TP53,VCAM1,VIM,XBP1	729 (21)
camptothecin		chemical drug	Activated	2.796		5.67e-12	ADO,AEN,ANXA4,API5,ARHGDIA,ARRB2,ATF3,AURKA,BAX,BFAR,BID,BIRC5,BTG2,CASP1,CASP8,CCNB1,CCR1,CCRL2,CD40,CD48,CDK4,CDKN1A,CXCR2,DDX39B,DPAGT1,EEF1A1,EEF1B2,F5,FAS,FGL2,FKBP3,FPR1,GADD45A,GPI,GRINA,H2AFX,H3F3A/H3F3B,HLA-A,HLA-DQA1,HLA-DQB1,HLA-E,HLA-G,HSPA5,ICAM1,IFI16,IL10RA,IL13RA1,IL16,IL1B,IMP3,INSIG1,JUN,LGALS3,LITAF,LY75,MARCKSL1,MBOAT7,MMP9,Mt1,MYC,NFKB1,NFKB2,NRP1,OLFM4,OPTN,OSM,OSTF1,P2RX4,P…	662 (15)
CSF1		cytokine	Activated	2.643	bias	6.3e-12	Acp5,BAX,BIRC5,Ccl2,CCNB1,CCND3,CD68,CDK4,CDKN1A,CSF1R,CYBB,DUSP1,EBP,EGR1,ENO1,FAS,FDPS,FN1,GOT2,GPI,HSP90B1,HSPA5,IFNGR1,IL10RA,IL18BP,IL1B,IRF5,IRF8,ITGAM,ITGB1,JUN,JUNB,MAFB,MMP9,MSR1,MVD,MYC,NFKB2,PCNA,PFKL,PKM,SIRPB1,SLC16A3,SLC1A5,SLC29A1,SLFN12L,SQLE,THBS1,TNFRSF1A,TNFRSF1B,TP53,TPI1,TPT1,VCAM1,XBP1	549 (17)
EGFR		kinase	Activated	2.926	bias	7.49e-12	ACOT7,ANXA1,BAX,BCL6,BIRC5,BTG1,CAPZA2,CCNA2,CCT5,CDK4,CDKN1A,CST3,CUL1,CXCR4,DUSP1,EGR1,EIF4E,EIF5A,EIF6,ENOPH1,EXOSC5,GADD45A,GRN,HDC,HNRNPA2B1,HNRNPK,HP,HSP90B1,HSPA5,HSPE1,ICAM1,IER2,IGBP1,IL1B,IVNS1ABP,JUN,JUNB,LCN2,MMP9,MTA2,MYC,NDUFB8,NSF,NSUN2,NUDC,PA2G4,PABPC1,PARP2,PCNA,PKM,PLAUR,PLK1,PPIA,PROM1,PSMB1,PSMB2,PSMB3,PSMB4,PSMB5,PSMB6,PSMB7,RANBP1,RBBP7,SDF2L1,SDHB,SERBP1,SLC2A3,SLPI,TCERG1…	813 (18)
doxorubicin		chemical drug		-0.415		1.09e-11	ABCB8,ADORA2B,ANXA1,APEX1,ATF3,AURKA,AURKB,BAX,BCAP31,BIRC5,BTG1,BTG2,CASP1,CASP8,CAT,Ccl2,CCNB1,CCNB2,CD14,CD40,CD44,CDKN1A,CDKN3,CENPA,CKAP4,CTSB,CTSD,CYBB,DDX1,DPAGT1,DUSP1,EEF1A1,EEF1B2,EGR1,EIF5A,EMP3,FAS,GADD45A,H2AFX,HDAC1,IL1B,IRF5,JUN,KIF20A,LCN2,LGALS3,LGALS3BP,LXN,MCM3,Ms4a6b,MVP,MYC,NCAM1,NFKB1,OSGIN1,P4HB,PCNA,PLK1,PRDX1,PSAP,PSMB10,PSMB8,PTTG1,RAC2,RBM3,RRM1,S100A10,SESN1,SLC25A4,SO…	751 (22)
MTOR		kinase		-0.766		1.26e-11	ACADL,ADPGK,AKR1A1,AKR1B1,ATP2B1,ATP5MG,ATP5PB,BIRC5,CASP1,CASP8,CCND3,CD40,CDKN1A,CEBPD,CNP,COX4I1,CS,CXCR4,CYCS,EIF3A,ENO1,ERCC1,ETFA,FABP5,FDPS,FKBP1A,FN1,GLUD1,GSTM5,HADHA,HADHB,HSD11B1,HSP90AB1,HSP90B1,IFI16,IL1B,MAP1LC3B,MDH1,MMP9,MYC,NCAM1,NDUFA6,NSUN2,OAS1,Otub1,PCNA,PDHA1,PFN1,PKM,PPIB,PRDX5,PSMB5,PTBP1,RHEB,RPL12,RPL23,RPS11,RPS18,SERPINB1,SLC16A3,SND1,SOAT1,SOD1,TK1,TNFRSF1A,TNFSF13,TP…	864 (19)
hydrogen peroxide		chemical - endogenous mammalian	Activated	2.985	bias	1.3e-11	ACAT2,ADAM9,AEN,ALOX5,APEX1,ATF3,ATP6V1A,AURKA,BAX,BIRC5,BSG,BTG2,CASP1,CAT,Ccl2,CCNA2,CCNB1,CCND3,CCR2,CD55,CD63,CD68,CD81,CDKN1A,CKS1B,CSF3R,CST3,CTSB,CTSD,CTSS,CXCR4,CYCS,DNAJA2,DPAGT1,DUSP1,EEF1A1,EEF1B2,EGR1,FAS,FDPS,FN1,GADD45A,GLRX,GPX1,H2AFX,HDC,Hspa1b,HSPA5,ICAM1,IL1B,INSIG1,JUN,KLF4,LCN2,LTB4R,MCM2,MIF,MMP8,MMP9,MSR1,MYC,OSGIN1,PARK7,PDCD4,PDIA3,PDIA4,PLAUR,PPP1CA,PRDX1,PRDX2,PRKCSH,PSM…	918 (21)
lactacystin		chemical - protease inhibitor	Activated	2.261		1.31e-11	AKR1B1,ARHGDIB,ATF3,ATP1A1,Ccl2,CCND3,CCRL2,CCT2,CD9,CDKN1A,CFL1,CLIC1,CTSD,CXCR4,DUSP1,EIF4E,EIF5A,FAS,FTL,GBA,GSTP1,HLA-A,HNRNPA2B1,HSP90B1,HSPA5,IFRD1,MMP9,MRTO4,NEDD8,NFKBIB,OPTN,PEA15,PEBP1,PFN1,PPIA,PPP5C,PXN,RANBP1,RANGAP1,RPLP0,RPLP2,SH3BGRL,SLC3A2,STMN1,SUB1,TACSTD2,TCERG1,TP53,TUBB2A,TXN,UBE2N	893 (21)
resiquimod		chemical drug		0.74	bias	1.34e-11	AIF1,ANXA4,ARL5C,ATF3,ATP5F1A,ATP5F1C,ATP5PF,ATP6V1B2,BATF,CAT,Ccl2,Ccl9,CD40,CD44,Clec2d (includes others),CLEC4E,CSF1R,EBI3,FAS,FCGR1A,FH,GM2A,GPX1,HHEX,ICAM1,IL16,IL1B,INHBA,JUN,LAP3,LMNA,MRPS22,NFKB1,NLRP3,PARK7,PKM,PRDX1,PSMB2,PSMB4,PYCARD,RAP1A,STMN1,TMEM154,TNFSF13B,Tnfsf9,TRPM2,WARS,YWHAB	475 (12)
HSF2		transcription regulator	Activated	3.308	bias	1.65e-11	CCT2,CCT3,CCT4,CCT5,CCT6A,CCT7,CCT8,HSPA1A/HSPA1B,Hspa1b,HSPA4,IL1B,JUN,PSMA1,PSMA5,PSMB2,PSMB5,PSMC4,PSMD3,TCP1,TXN
APOE	0.927	transporter		-0.575	bias	2.42e-11	ACAT1,ACSL1,ANXA11,ATF3,BAX,C5AR1,C5AR2,CALR,CAMK1,CASP1,CAT,Ccl2,CD40,CD44,CD68,CLEC4C,CTSB,CTSD,CTSS,CTSV,Cyb5r3,CYBB,ECM1,EGR1,FCGR1A,FKBP4,GAS7,GPX3,HSD11B1,HSP90AB1,HSP90B1,HSPA1A/HSPA1B,Hspa1b,HSPA5,HSPD1,ICAM1,IL10RA,IL1B,IL1RN,ITGAM,JUN,LCN2,LIPA,M6PR,MAP3K1,MMP9,MSR1,MYBBP1A,NCF1,P4HB,PEA15,PPP1R15A,PSMC4,RPL10A,S100A8,S100A9,SCARB1,SLC27A4,SOD1,TCIRG1,TIFA,TNFRSF14,TNFRSF1A,TREM2,TXNIP,…	568 (18)
Immunoglobulin		complex		0.12		4.79e-11	ACSL1,ADIPOR1,AIF1,BATF,BCL6,BIRC5,BLVRB,C3AR1,CALR,CAPG,Ccl2,Ccl9,CCND3,CCR2,CD40,CD44,CD68,CD74,CDK4,CEBPD,CFP,CRISPLD2,CSF1R,CTSZ,CXCR2,CXCR4,DPYSL2,DUSP1,EBI3,EGR1,EIF2A,FAIM,FAS,FCGR1A,FPR1,GAS7,Gm16894,GPX1,HK3,HLA-DQB1,ICAM1,IFI30,IL10RA,IL1B,IL1R2,IMPDH2,INHBA,IRF5,KLF4,Ly6a (includes others),MMP9,MYC,NFKB2,NLRP3,NRP1,NT5E,OGT,OSM,PDIA6,PDLIM4,PLSCR1,PRDX1,PRDX5,REL,RELB,RPS11,RPS6,S100A8…	541 (15)
TNFSF11		cytokine		1.962	bias	7.52e-11	Acp5,ADORA2B,AIF1,AURKA,BSG,C3AR1,CAPN2,Ccl2,Ccl9,CCND3,CCR1,CD14,CD300LF,CD40,CD44,CDKN1A,CKB,CLEC4E,CSF1R,DUSP1,ELP2,FAS,FGR,FPR1,FRRS1,GLRX,GRN,ICAM1,IFRD1,IL13RA1,IL1B,IL1RN,ILF3,IRF8,ITGAL,ITGAM,JUN,JUNB,KEAP1,MAFB,MAP2K1,MARCKSL1,MMP9,MYC,NFKB1,NFKB2,NFKBIB,PA2G4,PLAUR,PLK1,RACGAP1,RELB,SIGMAR1,SLC7A7,Slfn2,STMN1,TNFRSF1B,Tnfsf9,VCAM1,VRK1	599 (15)
AGN194204		chemical drug	Activated	2.749	bias	9.29e-11	ACAA1,ACAA2,ACAT2,ANAPC5,ANXA11,ATF3,ATP1A1,AURKA,CCNA2,CCNB1,Cd24a,CDKN1A,CLIC4,CST3,DUSP1,EMP1,EMP3,FDPS,GADD45A,GPR65,H2AFX,H2AFZ,HIST1H1C,Hmgn2 (includes others),Ifi47,IFITM3,IL1R2,ITGB2,ITGB7,KIF20A,LAMP1,LGALS1,LMNA,MMP9,MYC,NPC2,PDCD4,PLAC8,PLK1,PROS1,RGS10,SLC3A2,TOP2A,XBP1	402 (13)
IL1B	-1.647	cytokine		-0.849	bias	1.06e-10	ADAM8,ADORA2B,AIF1,AKR1B1,ANXA1,ARL6IP5,ASS1,ATF3,ATP1A1,B2M,BAX,BCL6,BTG2,C3,CAT,Ccl2,Ccl9,CCR1,CCR2,CCRL2,CD14,Cd24a,CD40,CD44,CD55,CD74,CD82,CDKN1A,CEBPD,CFB,CTSB,CTSS,CTSZ,CX3CR1,CXCR4,Cyb5r3,CYBB,CYSLTR1,CYTIP,DBI,DUSP1,EBI3,EGR1,EIF4E,F13A1,FABP5,FAM129A,FAS,FN1,FPR2,G0S2,GADD45A,GM2A,GRN,GTF2F1,GUSB,GYS1,HDAC1,HEXA,HLA-A,HLA-E,Hmgn2 (includes others),HP,HPRT1,HSD11B1,HSPA1A/HSPA1B,HSPA5,IC…	624 (16)
F2		peptidase		1.237	bias	1.22e-10	AKR1B1,ALDH1B1,BAX,BSG,CALR,CASP1,Ccl2,Ccl9,CCNA2,CD44,CD55,CD63,CD68,CDKN1A,CKAP4,CLIC1,CORO1C,CXCR4,CYBB,DHRS9,DUSP1,ECE1,EGR1,EHD4,EIF4A1,ERP29,FN1,HSP90AA1,ICAM1,IER2,IL1B,ITGB1,JUN,JUNB,LAMP1,LAMP2,MGLL,MIF,MMP9,MYC,MYH9,NCF1,NUP62,OSM,PDIA4,PLAUR,PPIF,PROS1,RAC2,RELB,RNH1,SLC2A3,SRM,TAGLN2,THBS1,TMED9,TOMM40,VASP,VCAM1,YIF1A	739 (18)
TRAP1	0.513	enzyme	Inhibited	-3.769	bias	1.52e-10	ATP5F1D,C1QBP,CHCHD3,COX5A,COX8A,ECSIT,GARS,HIBADH,HSD17B10,HSPD1,HSPE1,MAVS,MRPL18,PKM,SARS,SOD1,TIMM13,TXN2
IL6		cytokine		0.381	bias	1.53e-10	Acp5,ADORA2B,AHNAK,ANXA1,ATF3,BATF,BAX,BCL6,BIRC5,BTG2,BUB3,C3,C5AR1,CAPRIN1,CASP1,Ccl2,CCNA2,CCNB1,CCNB2,CCR1,CCR2,CD14,CD40,CD44,CD48,CD68,CD74,CD82,CDC20,CDKN1A,CDKN2D,CDKN3,CEACAM1,CEBPD,CENPA,CFH,CFP,CLEC10A,CLEC4E,COX4I1,CSF3R,CST3,CTSC,CX3CR1,CXCR4,CYBB,CYTIP,DUSP1,EGR1,FAS,FCGR1A,FCGRT,FFAR2,FN1,FPR2,FRRS1,GADD45A,GLRX,HFE,HLA-A,HLA-DMA,HLA-DQA1,HLA-DRB5,HP,HSPA5,ICAM1,IFI16,Ifi202b,IFITM…	579 (16)
WR 1065		chemical drug	Activated	2.551	bias	1.65e-10	BAX,CAT,CDKN1A,EIF2B1,ERCC1,FAS,GADD45A,HDAC3,MYC,NEDD8,NME1,RAD23A,S100A4,TP53,XPC,ZFP36L1	867 (23)
IgG		complex		-1.59	bias	1.74e-10	ASAH1,ATP1B3,B2M,C3,CALR,Ccl2,CD40,CD9,CDKN1A,CEBPD,CTSC,CYP27A1,DUSP1,EMP1,FABP5,FCGR1A,FN1,GPX1,GUK1,HLA-E,HSPA5,IER2,IFITM3,IL16,IL1B,IL1RN,ITGAM,LCN2,LGALS1,LGALS3,Ly6a (includes others),LY9,MMP9,MYC,PEA15,PLAUR,PPIF,PPP1R15A,RND3,SLC2A3,TACSTD2,TNFRSF13B,TUBB2A,VCAM1,ZMPSTE24	519 (15)
Ige		complex	Activated	2.858	bias	1.78e-10	ADAM8,ALOX5,ANXA1,BCL6,BIRC5,C3,CAPN2,CARHSP1,Ccl2,Ccl9,CCND3,Cd33,CD40,CD74,CDKN1A,CEACAM1,CLEC4E,COQ7,CYCS,DUSP3,EBI3,EGR1,ENOPH1,FAS,FCGR1A,FFAR2,FGD2,GSN,HDC,HFE,HLA-DMA,HSD17B12,HSPA9,HSPD1,ICAM1,IL1B,JUNB,KLC1,MARCKSL1,MGST2,MIF,MYC,NAPA,NFKB1,NFKB2,NFKBIB,NRP1,OSM,PEA15,PFN1,PILRA,PPIF,PRDX1,RELB,SCARB1,SERPINB1,SLC11A1,SNRPD1,SNRPD3,SNX1,SRM,TCIRG1,TNFRSF13B,TNFRSF1B,Tpm1,TPST2,TUBB6,VCAM…	759 (16)
MMP12		peptidase				1.91e-10	CAPZA1,CAPZA2,CCT5,CORO1C,CXCR2,EIF3F,MMP9,MYH9,PKM,PSAP,PSMA1,PSMA3,PSMA5,PSMA6,PSMB2,PSMB7,PSMC3,PSMD1,PSMD11,PSMD14,TBCA,Tnfsf9,VCP,YWHAG,YWHAH	173 (5)
PDGF BB		complex		1.122	bias	3.1e-10	ACAT2,ANXA11,ARG2,ATF3,ATP2B1,C3,Ccl2,CCND3,CD44,CDK4,CDKN1A,CEBPD,CSF1R,CYCS,DGAT1,DUSP1,EGR1,EIF4E2,FN1,GADD45A,GDA,GPR183,HLA-E,HSD3B7,IER2,IL1B,INHBA,ITGB1,JUN,JUNB,KLF10,LGALS3,LMNA,MAT2A,MCM6,MGST1,MGST2,MMP9,Mt1,MYC,NDUFB8,NXF1,PCNA,PDLIM1,PPP1R15A,PSMB4,RFC5,RND3,RPL13,RPN2,RPS14,RPS6,SLC29A1,SLC2A3,SLC7A7,SRSF7,SYNE1,TAF9,THBS1,TIMM17A,TP53,TRA2B,TRIB1,TRIOBP,UCK1,VCAM1,VCAN,ZFP36L1	441 (16)
poly rI:rC-RNA		biologic drug		1.234	bias	3.14e-10	ANXA1,ATF3,B2M,BAX,Bst2,C3,CAMP,Ccl2,CCND3,CD14,CD40,CD44,CD74,CEACAM1,CEBPD,CFB,Clec2d (includes others),Clec4b2,CNP,CXCR4,CYP4F2,DUSP1,EBI3,EGR1,EIF2S3,FAS,FCGR1A,FCN1,FN1,FPR1,GATM,HFE,HLA-A,HLA-E,HLA-G,ICAM1,IFI16,IFITM3,IFNGR1,IL10RA,IL1B,INHBA,IRF5,ITGAM,JUN,JUNB,KLF4,Klrk1,LTA4H,LTB,LTF,LY6E,M6PR,MMP9,MS4A3,MSR1,MVP,Mx1,MYC,NFKB1,NKG7,NLRP3,OAS1,OAS3,PLAUR,PPP1R15A,PRKCD,PRTN3,PSMA3,PSMB8,…	524 (15)
FOS		transcription regulator		0.539		4.94e-10	Acp5,ACTG1,ANXA4,APLP2,ATF3,BLMH,C3AR1,CALU,CAMP,CAPN2,CAT,CCNA2,CD14,CD44,CD68,CTSB,CTSH,CTSV,CYCS,DAP,EGR1,EMB,ENO1,ERCC1,FEZ2,FN1,GBA,GM2A,GPSM2,GSTP1,HSD17B10,HSP90B1,HSPA5,ICAM1,IL36G,ITGB1,JUN,JUNB,LAMP2,LGALS3,LGALS3BP,MALAT1,MCM5,MGST1,MMP8,MMP9,MXD1,MYC,MYH9,NDUFS7,NUBP1,PCYT2,PFN1,PLAUR,Ppp2r5c,PRDX1,PSMA2,PSMA7,PSMB3,PTP4A2,PTPRO,PTTG1,RARA,RBBP7,RNH1,RPL39,RPL9,RPLP0,RPS18,RPS24,RPS6,…	917 (19)
IL13		cytokine		0.66	bias	5.04e-10	Acp5,ACSL1,ADAM15,ADAM8,ADORA2B,ARG2,ATF3,AVPI1,BATF,BAX,BID,BLVRA,C3,C3AR1,CAPN2,CASP1,CASP6,CASP8,Ccl2,Ccl6,CD101,CD14,CD37,CD40,CD44,CD48,CLEC10A,CLEC4E,CTSB,CTSC,CTSH,CTSS,CTSV,CXCR2,CXCR4,CYBB,CYSLTR1,DNASE2,EGR1,F13A1,FAS,FCGR1A,FGD2,FKBP1A,FPR2,FZR1,G0S2,GAS7,GPX3,GSN,HDC,HPSE,HSD11B1,ICAM1,IFNGR1,IL13RA1,IL1B,IL1R2,IL1RN,LIPA,LTA4H,MMP9,NCAPH,NCLN,PID1,RFTN1,S100A8,SLC7A7,SLPI,SWAP70,SYNG…	529 (15)
MEL T1		chemical - kinase inhibitor		-0.577		5.79e-10	ATP5F1B,ATP5F1D,C1QBP,CFL1,COX5A,ENO1,FH,HSPA1A/HSPA1B,HSPD1,PGK1,PRDX1,PSMA1
FOXO1		transcription regulator	Activated	2.468	bias	6.62e-10	ACSL5,ADIPOR1,ANXA3,Atp5e,ATP5F1B,ATP5MC3,ATP5PF,ATP6V0B,BAX,BID,BIRC5,CASP6,CASP8,CAT,CCNA2,CCNB1,CCNB2,CD40,CDK5RAP3,CDKN1A,CDKN2AIPNL,CERS5,CS,CTSV,CYCS,DNAJC19,EGR1,FABP5,FAS,FDPS,FN1,GADD45A,GPI,HSP90AB1,HSPA5,HSPD1,ICAM1,IL1B,IRF5,ITGAM,ITGB2,JUN,JUNB,KLF4,KLF7,LAMP2,MAVS,MCM5,MMP9,MRPL14,MRPS12,MRPS14,MRPS18A,MRPS22,MRPS30,MRPS7,MVD,MYC,NDUFA12,NDUFA4,NDUFA9,PDHB,PLSCR1,PPP1R15A,PRCP,PRKCD…	737 (20)
let-7		microRNA	Inhibited	-3.281	bias	8.5e-10	ALDH1B1,AURKA,AURKB,BTG2,CCNA2,CCNB1,CD44,CDC16,CDC20,CDCA3,CDCA8,CDT1,CEBPD,CKS1B,EIF4A1,FBL,FN1,GMNN,GPI,IL6R,ITGA1,LIN28A,MCM2,MCM3,MCM5,MCM6,MCM7,MRTO4,MYC,NAP1L1,NFKB1,PA2G4,PAICS,PKM,PLAUR,PROM1,RBM38,RFC3,RFC5,RRM1,S100A4,SIGMAR1,SSR1,TARBP2,THBS1,TRAP1,TRIB1,VIM	453 (15)
FLT1		kinase		1.265		8.9e-10	AHCY,APLP2,BCL7B,BIRC5,CANX,CAPN2,Ccl2,CDKN1A,CLIC4,EIF2S3,EIF4B,EIF5A,G3BP1,G3BP2,GDI2,ICAM1,LAMP1,LIMS1,MAT2A,MAX,PTBP1,SDHC,SNAP23,SURF1,THBS1,UBE2B,VDAC1	450 (16)
EIF4E	0.313	translation regulator	Activated	4.577	bias	9.71e-10	ATOX1,BIRC5,CAPG,CAPZB,Ccl2,CDK4,CDKN1A,CDT1,EGLN2,GPS1,GPS2,GPX3,HMOX2,INSIG1,KLF13,LSM2,LSM4,LSM7,MYC,NEDD8,NHP2,NOP10,NRP1,PA2G4,PCNA,PHB,PHF5A,PLAUR,PNKP,PRDX5,PRPS1,PTGES3,RHOG,SIVA1,TP53,TXNL4B,UBE2A,UBE2C	301 (11)
HTT		transcription regulator		0.45		1.02e-09	ACAT2,AP1S1,ATF3,ATP1A1,ATP5F1A,ATP5F1B,ATP5MC1,ATP5MF,ATP5PO,B2M,BCAP31,BCL6,BID,CANX,CASP1,CBX1,Cd24a,CD74,CD9,CDKN1A,CLDN1,COX4I1,COX6A1,CSF1R,CTSD,CYC1,CYCS,CYFIP2,DNAJA2,DNAJC3,DPM2,ECI1,EEF1A1,EEF2,EGR1,EMP3,FAM173A,FDPS,FKBP4,FN1,GAS7,GLO1,Gm21596/Hmgb1,GPI,GPX3,GSN,HSP90AB1,Hspa1b,HSPA5,HSPA8,HSPA9,HSPD1,HSPE1,IFI16,ITGB1,JUN,JUNB,KLF4,LTF,MPEG1,Mt1,NDUFA1,NDUFA12,NDUFA3,NDUFA5,NDUFB2,NDU…	962 (21)
GnRH analog		biologic drug	Inhibited	-2.819		1.36e-09	ACAA2,ACOT7,ADAM8,ANXA11,ATF3,ATP5F1A,BUB3,CALR,CASP8,CD40,CKS1B,CLTA,CYC1,DDOST,DUSP1,EIF2B2,EXT2,FAS,FCGRT,FKBP1A,FN1,GATD3A/GATD3B,GDI2,GPSM2,GSTO1,HADHB,HINT1,HSP90AB1,IK,INHBA,JUN,KLF7,LIMS1,NADK,NARS,NDUFB5,NDUFS7,NDUFV2,NME2,OGFR,PABPC1,POLR2E,PPIA,PRCP,PSMA6,PSMB3,PSMB4,PSMB7,PSMD1,PSMD13,RAN,RARA,SLC2A3,SNRPD3,SNX3,SRI,SRSF3,SSR1,TMBIM6,TP53,TUBA1A,TYK2,UBE2V1,UQCRB,UROD,VCP,YIF1A	368 (7)
CD40LG		cytokine	Activated	2.945	bias	1.53e-09	ALG3,ANXA6,ANXA7,APRT,ATF3,B2M,BATF,BAX,BCAT2,BCL6,BTG1,CASP1,CBX3,CCND3,CCR1,CCR2,CD40,CD44,CD63,CDKN1A,CFP,CTSC,CXCR4,CYTIP,DUSP1,EBI3,EGR1,EIF2A,EIF2S1,FAS,FBL,G0S2,GADD45A,GPR183,HLA-DQA1,HLA-DQB1,HSP90AA1,HSPA1A/HSPA1B,ICAM1,IL10RA,IL13RA1,IL1B,INHBA,ITGAM,ITGB7,ITPA,JUN,JUNB,KDM6B,LMAN2,LTB,MARCKSL1,MIF,MYC,NAP1L1,NFKB1,NFKB2,NFKBIB,PLAUR,PSMA2,PSMB10,PSMB8,PSMB9,PSME1,PSME2,REL,RELB,SLC29A…	550 (15)
CD38		enzyme	Activated	3.16	bias	2.2e-09	ANXA6,APH1A,ASS1,BCL6,CD44,CHST12,CISD1,CKAP4,CRELD2,CRIP1,FGL2,FN1,GBE1,ICAM1,IFI30,IL1R2,IL6R,ITGB7,LGALS3,MANF,MTDH,NCAM1,NT5E,PDIA6,PDLIM1,PFKL,PKM,PRDX4,PSAT1,RPN1,S100A4,S100A6,SDF2L1,SLC16A3,SPCS2,TMED5,TMEM97,TPI1,VCAM1,VIM,XBP1	511 (16)
E2F4		transcription regulator		-1.067		2.53e-09	ALG5,ASF1B,AURKB,BUB3,CASP6,CCNA2,CDCA4,CDKN1A,CENPA,CKS1B,CSDE1,DDB1,EIF2B2,EMC4,EXOSC8,FAS,FEN1,GMNN,GOLT1B,H2AFX,H2AFZ,HIST2H2AA3/HIST2H2AA4,HP,HSP90B1,KIF22,MCM3,MCM5,MCM6,MRTO4,MYC,NPM1,PCNA,PLK1,PLSCR1,PRKCSH,PRPSAP1,PSAT1,PTTG1,RANBP1,RFC3,RRM1,SLC3A2,STMN1,TK1,TMEM126A,TMPO,TOP2A,TP53,UBE2C,UHRF1,XPC
TFEB		transcription regulator	Activated	2.688	bias	2.71e-09	Acp5,ATP6V0B,ATP6V1A,ATP6V1B2,ATP6V1C1,ATP6V1H,CTSA,CTSB,CTSD,GBA,GNS,HEXA,IL1B,LAMP1,MCOLN1,NEU1,PSAP,SCPEP1
Cdc42		enzyme		1.5		2.71e-09	ATP6V1A,BID,CAPZA1,CASP1,Ccl2,CTSA,CTSB,CTSD,CTSH,CTSS,CTSV,CTSZ,FAS,LAMP1,LAMP2,MYH9,NPC2,STMN1	367 (12)
ANGPT2		growth factor	Activated	3.979	bias	2.87e-09	APIP,CALR,CAT,Ccl2,CCT7,CD68,CDKN1A,CFB,COMT,EEF1B2,EXT2,FAS,FEN1,FKBP2,FKBP4,FN1,HSP90AA1,HSPA1A/HSPA1B,HSPA4,HSPA5,HSPD1,ICAM1,IL1B,KDM6B,KPNA2,MAP2K1,MGST1,MIF,MMP9,NCF1,NDE1,NME1,P4HB,PDCD4,PDIA3,PDIA6,PROS1,RPS6,SOD1,ST13,THBS1,TP53,TXNIP,UBE2A,VCAM1,VIM	717 (18)
CDKN2A		transcription regulator	Inhibited	-2.779		3.2e-09	ANAPC5,ASF1B,AURKB,BAX,BIRC5,BTG2,C3,CAPG,Ccl2,Ccl6,Ccl9,CCNA2,CCNB1,CCND3,CDCA4,CDKN1A,CDKN2D,CEBPD,CUL1,CXCR2,DCK,DEK,DUSP1,EEF1A1,EGR1,FBL,FEN1,GAS7,H2AFX,IFI35,IL1B,IL1R2,JUN,LAMP1,LGALS3,MCM5,MCM7,MYC,NFKB2,NPM1,PCNA,PLK1,POLD2,PSMA5,PSMB9,RAB27A,RBBP7,RFC3,RRM1,S100A6,SAE1,TCF19,TK1,TMEM97,TMPO,TNFRSF1A,TNFRSF1B,TP53,VIM,VPS41,VRK1	728 (18)
TCF3		transcription regulator	Inhibited	-2.327		3.88e-09	ANXA6,ASF1B,ATF3,AURKA,BCL6,BID,BIRC5,CASP6,CCNA2,CCNB1,CCNB2,CCND3,CCS,CD55,CDC20,CDCA3,CDKN1A,CDKN3,CKAP4,Clec2d (includes others),CRELD2,CTSV,DCK,DSTN,FGD2,GADD45A,GM2A,H1F0,H2AFX,HADHA,HCST,Hmgn2 (includes others),HSD11B1,HSP90B1,IFI16,IFNAR1,IL1B,JUN,KLF4,LMO4,Ly6a (includes others),MANF,MORF4L2,MYC,OPTN,PAFAH1B3,PDIA4,PDIA6,PGK1,PLAC8,PRDX2,PRDX4,PSAP,RACGAP1,RASA4,RASSF4,RCBTB2,SDF2L1,SERP…	376 (9)
IRF4		transcription regulator		-0.809		4.13e-09	Acp5,B2M,BCL6,CANX,Ccl2,CCNB1,CD68,CLTA,CTSS,CX3CR1,CXCR4,DBI,DNASE2,FAIM,HSPA8,IL18RAP,IL1B,IL1RN,IRF5,ITGAL,ITGB1,MANF,MYC,OAS1,PCNA,PDCD6,PHF11,PLAUR,PLSCR1,PPIB,PSMA1,PSMA2,RPL6,SUB1,TK1,TNFSF13B,TSPAN31,XBP1,YWHAH,ZFP36L1	550 (15)
cholesterol		chemical - endogenous mammalian		-1.418		4.54e-09	ACAT1,ACSL1,ATF3,BSG,C15orf48,CASP1,Ccl2,CCR2,CD14,CD68,CLEC5A,CYBB,CYP27A1,DBI,FABP5,FDPS,FN1,GBA,HLA-DRB5,HSP90B1,HSPA5,ICAM1,IL10RA,IL1B,IL1RN,INHBA,INSIG1,ITGAM,LAPTM5,LGALS3,MANF,MAP1LC3B,MMP8,MPEG1,Orm1 (includes others),PCYT2,PLTP,PSAT1,RGCC,RPL36AL,RPS28,S100A8,SCARB1,SQLE,THBS1,TMEM123,Tpm1,UQCRHL,VCAM1,XBP1	491 (15)
E. coli B4 lipopolysaccharide		chemical toxicant		-0.495	bias	4.83e-09	ANXA1,ANXA11,BAX,BID,CASP6,CASP8,Ccl2,CD40,Cd52,CENPA,CLDN1,CLEC5A,CYP27A1,CYTH4,EMB,EVI2B,F13A1,F5,FAS,FCGR1A,FGL2,FPR1,FPR2,HLA-A,ICAM1,IFI16,IFI35,IFITM3,Ifitm6,IL1B,IL1RN,LCN2,LCP1,LRRFIP1,Ly6a (includes others),Mx1,NCF1,NFKB1,Ngp,PLAUR,PROS1,PSMB8,PYCARD,RELB,RPL7,RPS25,SCARB1,SEH1L,Slfn2,Stfa2/Stfa2l1,TF,TNFRSF1A,TNFRSF1B,TP53,TRADD,TSPO,TXNIP,UHRF1,VCAM1	522 (15)
indomethacin		chemical drug		1.234		5.13e-09	ACSL1,ADAM8,ALOX5,ANXA1,ARG2,ATP6V0B,BAX,BIRC5,BSG,BTG2,CAPN2,Ccl2,CCNB1,CD14,CD44,CD55,CDKN1A,CLDN1,COX8A,CTSD,CXCR4,DGAT1,EMP3,GBA,IFITM3,IL1B,ITGAM,LCN2,LGALS3,LXN,MANF,MCM3,MYC,P4HB,PCNA,PLAUR,PROM1,PSMB10,PSMB5,PSMB8,PSMB9,RBM3,RFTN1,RPS21,RPS28,S100A10,S100A8,TUBB,UCP2,UQCR10,VCAN,VIM,YWHAE	528 (16)
STAT1		transcription regulator	Activated	3.02	bias	6.78e-09	B2M,BAX,BCL6,BIRC5,BTG1,C3,CASP1,CASP6,CASP8,Ccl2,CCND3,CCRL2,CD14,CD40,CDKN1A,CEACAM1,CEBPD,CFB,CSF3R,CTSS,CX3CR1,DDX60,EGR1,FAS,FCGR1A,FGL2,HLA-DQA1,HLA-DRB5,HLA-E,ICAM1,IFI16,IFI30,IFI35,Ifi47,IFITM2,IFITM3,IL18BP,IL1B,IRF5,IRF8,JUN,KLF4,Klrk1,LCN2,LY6E,LY96,MMP9,MS4A3,Mx1,MYC,OAS1,PSMB10,PSMB8,PSMB9,PSME1,PSME2,S100A10,SAMHD1,Slfn1,SLFN12L,Slfn2,SMARCB1,SOAT1,TNFSF13B,TP53,TRAFD1,WARS,Wfdc17	560 (18)
LDL		complex		1.261	bias	7.17e-09	ARG2,ATF3,C3,CAPN1,CAPN2,CASP1,CASP6,CASP8,Ccl2,CCR2,CD40,CD68,CDKN1A,CX3CR1,CYBB,DUSP1,ECE1,EGR1,EMB,FAS,FCGR1A,FDPS,G0S2,GPR183,GPX1,HSP90B1,HSPA5,ICAM1,IL10RA,IL1B,IL1RN,INSIG1,JUN,LASP1,LIMS1,MMP8,MMP9,MSR1,NCF1,NFKB1,NLRP3,NME1,NPC2,PARP1,PSMC5,RANBP1,RARA,RNASEH1,RND3,S100A8,SCARB1,TP53,TRADD,VCAM1,XBP1	554 (16)
PCGEM1		other	Activated	2.096	bias	7.3e-09	CS,ENO1,FH,GLUD1,GPI,IDH1,IDH2,NUDT9,OGDH,PDHA1,PDHB,PGD,PGK1,PGLS,PKM,SDHA,SUCLG1,TALDO1	621 (7)
Esrra		transcription regulator	Activated	3.693		7.35e-09	ACADL,ACAT1,ACSL5,ATP1A1,ATP5F1B,ATP5MC1,ATP5MC3,ATP5MF,ATP5PB,ATP5PF,ATP5PO,COX5A,Cox5b,COX7A2L,Cox7c,COX8A,CYC1,CYCS,ENO1,GYS1,IDH3A,NDUFA2,NDUFA5,NDUFS3,PFKL,PPA1,PYGL,RARA,SDHB,STARD3,UQCR11	519 (7)
MRTFB		transcription regulator	Activated	3.411	bias	7.61e-09	CAMP,CD177,CEBPE,CLDN15,CNN2,CXCR4,FCN1,G0S2,GSTM5,HLA-A,ITGB1,LCN2,LTF,MAPK13,MGST2,MOGAT2,MS4A3,MYH9,Ngp,PGLYRP1,PRSS57,PRTN3,S100A8,S100A9,SCARB1,SERINC3,SLPI
prostaglandin J2		chemical - endogenous mammalian	Activated	3.952	bias	8.51e-09	CDKN1A,HSPA1A/HSPA1B,PSMA2,PSMA3,PSMA5,PSMA6,PSMB2,PSMB3,PSMB4,PSMB7,PSMC5,PSMD1,PSMD12,PSMD3,PSMD6,PSMD8	474 (11)
rosiglitazone		chemical drug		1.451		9.21e-09	ACAA2,ACADL,ACO2,ACSL1,ACSL5,ADAM8,ADIPOR1,ALOX5,ASAH1,ATP1A1,BAX,C3,CAT,Ccl2,CCR2,CCRL2,CD68,CDKN1A,COX4I1,COX5A,CS,CYCS,DGAT1,DGAT2,DHRS3,DOK1,EBI3,EDNRA,EGLN2,ERP44,ETFA,ETFDH,FABP5,FN1,GPR65,HADH,HADHB,HP,HSD11B1,HSPA5,HSPA9,ICAM1,IDH3A,IDH3B,IL1B,IL1RN,INSIG1,ITGAL,ITGAM,KLF4,LCN2,LRG1,LTB4R,MAT2A,MCM6,MCM7,MGLL,MMP9,MSR1,Ngp,OAS1,OAS3,PCNA,PDHA1,PEA15,PHYH,PLTP,PTPRO,S100A8,S100A9,SAMHD1,SC…	612 (20)
tanespimycin		chemical drug		-1.743	bias	1.05e-08	AHSA1,ARRB2,BIRC5,CAPN1,CDK4,CDKN1A,CYCS,EIF4A1,FAS,HAT1,HNRNPA2B1,HNRNPM,HSP90AB1,HSP90B1,HSPA1A/HSPA1B,HSPA5,HSPA8,HSPA9,IL6R,JUN,MIF,MYC,OSM,PRDX3,PSMA7,RAF1,RPL24,RPL27A,RPL30,RPL35,RPS16,RPS8,SNRPB,SNRPF	797 (21)
FOXM1		transcription regulator	Activated	3.571	bias	1.3e-08	ANXA1,AURKB,BIRC5,CAT,CCNA2,CCNB1,CCNB2,CDC20,CDCA8,CDKN1A,CDKN3,CENPA,CKS1B,IKBKB,IL1RN,IPO7,JUN,KIF20A,MMP9,MYC,NFKB1,NFKB2,PCNA,PGK1,PLAUR,PLK1,PRDX2,PROM1,PTTG1,STMN1,TOP2A,TP53,VCAN,VIM,ZEB2	832 (22)
butyric acid		chemical - endogenous mammalian		0.206		1.37e-08	ALOX5,ANXA1,ANXA5,ATP5MC3,BAX,BIRC5,CAMP,CAP1,CCNA2,CCNB1,CCNB2,CCR1,CD44,CD81,CD82,CDC16,CDC20,CDK4,CDKN1A,CKS1B,CLDN1,COX6A1,CUL1,CXCR4,CYCS,DEK,DUSP1,EMP3,F10,FFAR2,G0S2,GAA,GADD45A,GDI1,GRN,GSN,GSTP1,H2AFZ,HADHB,HIST1H1C,ICAM1,IFI16,IFI30,IFITM2,IFNAR2,IL18BP,IL1B,IQGAP1,ITGAM,ITGB7,KLF4,LY6E,MAPK13,MMP9,MVP,MXD1,MYC,NEU1,NFKB1,NFKB2,NME1,NPM1,NRP1,NUCB1,PCNA,PDIA3,PFKL,PHB,PLSCR1,PRDX1,PRKCD…	711 (22)
CEBPA		transcription regulator		-1.535		1.52e-08	ACSL1,AGPAT2,AKR1B1,ANXA1,ARG2,ARL6IP5,ASPRV1,ASS1,BIN1,BTG1,BTG2,C3,C3AR1,CAMP,Ccl9,CCNA2,CCNB2,CCR1,CD14,CDC37,CDK4,CDKN1A,CEBPD,CEBPE,CKAP4,COPS5,COX4I1,CREG1,CSF1R,CSF3R,CTNNA1,CXCR4,CYCS,DGAT2,EDF1,EIF4E,FCGR1A,G0S2,GADD45A,GGH,GLRX,GSTP1,GTF3A,HDAC1,HP,HSD11B1,HSPA5,ICAM1,IL1RN,IL6R,ITGAL,ITGAM,JUN,JUNB,KLF4,LCN2,LGALS1,LIN28A,LITAF,LTF,Ly6a (includes others),MMP8,MYC,NRP1,Orm1 (includes ot…	881 (20)
CCL5		cytokine		-0.16	bias	1.65e-08	AIF1,C5AR1,CAPN2,Ccl2,CCR1,CCRL2,CD40,CD44,CDC37,DUSP1,EMP1,HDC,IER2,IL1B,ITGAM,LIMS1,MMP9,PLAUR,PNP,PPIF,SOD1,SQLE,THBS1,TUBB4B,VASP	557 (18)
PTGER2		G-protein coupled receptor		-0.834	bias	1.82e-08	AURKA,CCNA2,CCNB2,CDKN3,CFP,CKAP2L,CSF1R,CXCR2,CXCR4,ECM1,EGR1,ESD,FPR1,H2AFX,HDC,IL1B,IL1R2,IL36G,ITGAL,KIF20A,KIF22,MMP9,PILRB,PLK1,PXN,RACGAP1,Stfa2/Stfa2l1,TBL3,THBS1,TREM1	803 (19)
TFRC		transporter		-0.419	bias	1.99e-08	ANKRD22,ATF3,CCNA2,CCNB1,CDC20,CDKN1A,F13A1,FTL,GADD45A,GAS7,GPX3,HSPA5,ITGAM,ITGB2,JUN,LY75,MS4A6A,PHGDH,PLD4,PPP1R15A,PRTN3,SULF2,TP53,TREML2,UBE2E1,XBP1	384 (15)
ERN1		kinase	Activated	3.603	bias	2e-08	ARF4,ATF3,Ccl2,CEBPD,DGAT1,DGAT2,DNAJB11,DNAJC3,FAS,HSP90B1,HSPA5,IL1B,JUN,LPCAT2,MAP1LC3B,MORF4L2,MVD,NARS,PADI4,PDRG1,PROS1,SDF2L1,SEC11A,SEC61A1,SLC35B1,SMARCB1,SPCS2,SSR3,SURF4,TBCB,TINAGL1,WARS,XBP1	514 (17)
peoniflorin		chemical drug		0.312		2.8e-08	ATP5F1A,CLTA,COX5A,ENO1,GLO1,HIBADH,PDIA3,PPIF,PSMB7,SAR1B,TUBB,UBE2N
CD28		transmembrane receptor	Activated	3.297	bias	2.86e-08	ANXA1,ARHGDIB,ATP5F1C,BIN1,BTG1,BZW1,CASP6,CASP8,CCND3,CDK4,CS,CXCR4,CYC1,CYCS,DAD1,DUSP22,EBI3,EIF4E,FBL,FDPS,FKBP2,GYS1,H2AFY,HAT1,HAX1,HINT1,HIST2H2AA3/HIST2H2AA4,HLA-DQB1,HMGN1,HSPA1A/HSPA1B,HSPA8,IFNGR1,IL10RA,IL1B,IRF8,ITGAL,ITGB7,JUN,KDELR2,LCP1,MSR1,Mx1,MYC,NFKB1,NFKB2,PCYOX1,PHB,PHB2,PNP,PPA1,PRDX4,PSMA5,PSMA6,PSMD12,REL,RPL30,RPL6,RPS14,SEC61B,SLC16A3,SLC25A5,SNRPB,SSB,STOM,THBS1,TNFRSF…	651 (17)
TO-901317		chemical reagent		-0.306		3.24e-08	ACAA1,Acp5,ACSL1,ACSL5,ADIPOR1,ALDH2,ARG2,ASS1,C3,CASP1,Ccl2,Ccl9,CCNB1,CDK4,CFH,COMT,ECI1,ENO1,FABP5,FDPS,GBE1,GPI,GSTM5,GSTP1,HMGN1,HP,HSD11B1,HSD17B12,IL1B,LGALS3,MCM6,MGLL,MID1IP1,MMP9,MPEG1,MRPS7,Mt1,Orm1 (includes others),PFKL,PGLYRP1,PLTP,PSMA5,PSMA7,PSMB2,PSMB8,PSME1,RARA,SCARB1,SIGMAR1,TKT	737 (19)
YY1		transcription regulator		-0.54		3.66e-08	API5,AURKA,AURKB,BIRC5,BTF3,BTG2,CALR,CAPG,CBX3,CCNA2,CCNB1,CCNB2,CD3D,CDCA3,CDKN1A,CENPA,Cox5b,CXCR4,CYBB,EEF1B2,EGR1,FAS,FDPS,FEN1,H2AFX,Hnrnpa1,HSPA5,IL1B,INCENP,KIF20A,KIF23,LMAN1,MAT2A,MCM5,MCM6,MCM7,MPG,MYC,PCNA,PLK1,PNRC2,POLB,PPP1R15A,RND3,RPL30,RRM1,SCARB1,SLC25A4,TACC3,TGFBI,TOP2A,TP53,Tpm1,UHRF1,WSB1,YWHAE	769 (21)
GPX1	0.641	enzyme		0.212	bias	4.29e-08	CAT,Ccl2,CD14,CYBB,FAS,GLRX,GPX3,Hspa1b,ICAM1,MMP9,NDUFB8,SOD1,TNFRSF1A,TRADD,TXN,TXN2,UQCRC2,VCAM1	800 (16)
dextran sulfate		chemical drug		-0.712	bias	4.34e-08	ADAM8,ADORA2B,AURKA,BIRC5,C3,Ccl2,CCNA2,CCNB1,CCR2,CD14,CD177,CD40,CD74,CDC20,CDCA3,CDCA8,CFH,CKS1B,CXCR2,GSTM5,ICAM1,IFITM3,IL1B,IL36G,LCP1,LY96,MCM3,MCM5,MCM6,MMP9,MSR1,MYC,NCAPH,NDST1,NRP1,PARP1,PARP2,PCNA,PHGDH,PLK1,RACGAP1,S100A8,S100A9,Slfn2,STEAP3,STMN1,THBS1,TNFRSF1B,TOP2A,UBE2C,UHRF1,VCAM1	726 (15)
PLA2R1		transmembrane receptor	Activated	2.362	bias	4.47e-08	ALDH2,ATP5F1B,ATP5PD,CTSA,CTSD,DPYSL2,LAP3,MGST1,NDUFA5,NDUFS3,PEBP1,SDHA,SDHB,UQCRFS1
OGA		enzyme		-0.948		4.74e-08	ACO2,ACTG1,ADRM1,APOBEC1,ASS1,ATP5MG,BAX,C3AR1,CAPN1,CASP1,Ccl2,Ccl6,Ccl9,CCR1,CD14,Cd24a,CD302,CD40,CD44,CD48,CD55,CD68,CDCA4,CDKN1A,CEACAM1,CLDN1,CSF1R,CX3CR1,CYFIP2,DAGLB,EIF2A,FAS,FDPS,FN1,GAA,GADD45A,GSN,GTF3A,HK3,HSD3B7,HSP90AB1,IDH3A,IGBP1,IL6R,ITGB7,JUN,LPXN,MGLL,NDUFA13,NDUFA2,NDUFA4,NDUFA5,NDUFA6,NDUFA9,NDUFB11,NDUFB9,NDUFC2,NFKBIB,OGDH,PDCD6IP,PDHA1,PLD4,PRDX4,PROM1,PYGL,RAB27A,S100A6,…	772 (19)
26s Proteasome		complex		-1.568	bias	4.75e-08	ADRM1,ATP6V1H,BAX,CCNA2,CD68,CDKN1A,CTSA,CTSB,CTSD,H2AFX,ICAM1,IFI35,JUNB,KIF23,LAMP1,MAP1LC3B,MCOLN1,MYC,NFKB1,NFKB2,PSAP,PSMB3,PSMB5,PSMB6,PSMC2,PSMC4,PSMD2,PSMD6,RFC3,TK1,TOP2A,TP53,TXNIP,UBE2I,VIM,WBP2,WIPI1	819 (19)
fulvestrant		chemical drug		-0.402		4.89e-08	AIMP1,ATP5F1B,AURKA,BAX,BIRC5,C3,Ccl2,CCNA2,CCNB1,CD74,CDC20,CDKN1A,CKS1B,CNBP,COMT,CYCS,EGR1,FEN1,FKBP1A,GADD45A,GSTP1,H2AFX,ICAM1,IL1B,ITGB1,JUN,KLF10,LTF,MANF,MCM2,MCM3,MCM5,MCM7,MYC,NME1,NRP1,NSUN2,PCNA,PDCD4,PRPS1,PTTG1,RFC5,RNASEH2A,RNF4,RRM1,SLC25A5,SOD1,STMN1,SUSD3,TK1,TP53,TSC22D3,UBE2C,VCAM1	795 (21)
ESR1		ligand-dependent nuclear receptor		0.162		4.94e-08	ACSL1,AHNAK,ALOX5,ANAPC5,ANO10,ANXA3,ANXA4,AP1G2,AP1S1,AP2S1,APEX1,ARPC5L,ARSG,ASS1,ATF3,ATG3,ATP2B1,ATP6V1A,ATP6V1H,AURKA,BAX,BCCIP,BCL6,BIN1,BIRC5,BUB3,C3,CAMK1,CAPN2,CASP6,CCNA2,CCNB1,CCND3,CCPG1,CD55,CDC42SE1,CDCA8,CDK4,CDKN1A,CDKN3,CEBPD,CENPA,CENPM,CKB,CLDN1,Clec2d (includes others),COMT,COPA,COPE,COPG1,COPZ1,CSNK1A1,CTSB,CTSC,CTSD,CTSS,CYFIP2,EGR1,EIF5A,ENO1,FAS,FIBP,FKBP4,GAS7,GLRX,GM2A,G…	1006 (22)
IL10RA	0.574	transmembrane receptor		1.396		6.1e-08	ACSL1,ALDH2,ALOX5,ARG2,ASS1,BAX,C3,Cd24a,CD300LF,CD40,CDKN2D,CFB,CLEC4E,CLEC5A,CSF3R,CYFIP2,ECM1,F10,F13A1,FABP5,FAS,FN1,GDA,GSTM5,HK3,HLA-A,HPSE,HSPA8,IFI16,Ifi47,IL18BP,IL1B,IL1RN,INHBA,ITGAM,ITGB7,Klrk1,LCN2,LMO4,LRG1,Ly6a (includes others),MLKL,MMP25,MSRB1,PDE2A,PSMB8,PSMB9,PYGL,RIPK3,SAMHD1,SELENBP1,SIRPB1,SLC16A3,Slfn1,TFEC,TNFRSF14,TREM1,TREM3,Treml4,TRPM2	387 (12)
MYBL2		transcription regulator	Activated	2.96	bias	6.44e-08	AURKA,BIRC5,CASP6,CCNA2,CCNB1,CCNB2,CLTA,COPA,HSPA8,IQGAP1,ITGB1,MYC,PLK1,SLC1A5,SLC25A3,TFEC,TOP2A,UBE2C	732 (16)
NRAS		enzyme				6.48e-08	2810025M15Rik,ANXA4,B2M,BAX,BUB3,CCNB1,CCNB2,CD48,CDC20,CDKN1A,CDKN3,CEACAM1,CENPA,CFH,CX3CR1,CYBB,EGR1,FN1,HLA-A,IFI16,Ifi202b,IFI35,IL13RA1,IL1RN,KIF22,LCN2,LGALS1,LY86,MCM3,MSR1,NCAM1,PLEKHO1,PLTP,POLR2M,PRDX2,PSMB8,RBM38,RNASE6,SESN1,TUBB2A,UBE2C,YIF1A,ZNF32	801 (21)
NFE2L1		transcription regulator	Activated	3.341	bias	6.52e-08	GSTP1,PSMA1,PSMA6,PSMA7,PSMB1,PSMB2,PSMB5,PSMB6,PSMB7,PSMC2,PSMC3,PSMD1,PSMD11,PSMD12,PSMD14,XPC
RAF1	-0.554	kinase		1.377	bias	7.2e-08	ACAT2,ACOT7,ANXA1,BCL6,BTG1,CD37,CD44,CD74,CDKN1A,CLDN1,CTSH,DHRS3,EGR1,EMP1,EMP3,FAS,GRN,HDC,HNRNPA2B1,IER2,IGBP1,IL1B,ITGAM,ITGB1,JUN,MGLL,MMP9,MXD1,MYC,NFKB1,NOP56,PLAUR,PNP,RAN,RND3,RPS2,SELENBP1,SNRPD1,SQLE,TCOF1,TOMM40,Tpm1,TUBB2A,TUBG1,TXNIP,YPEL5	813 (18)
SRF		transcription regulator	Activated	2.377		7.26e-08	ACTG1,BATF,CAMP,CAP1,CAPRIN1,CD177,CDK4,CDKN1A,CEBPD,CEBPE,CLDN1,CLDN15,CNN2,CTNNBL1,CXCR4,DSTN,EGR1,EIF6,FCN1,G0S2,GADD45A,GDA,GLRX3,GSN,GSTM5,HIPK1,IER2,ITGA1,ITGAM,ITGB1,JUN,JUNB,LCN2,LTF,MALAT1,MAPK13,MGST1,MGST2,MMP9,MOGAT2,MRPS35,MS4A3,MYH9,Ngp,NPM1,PDE2A,PDLIM7,PGLYRP1,PPIA,PRSS57,PRTN3,RAF1,RND3,RNH1,S100A8,S100A9,SCYL1,SLPI,SND1,SNX2,TMEM40,Tpm1,TUBB4B,VCAN	549 (10)
SYVN1		transporter	Activated	3.787	bias	8.2e-08	ADAM9,ANO10,APLP2,ASF1B,ATP1A1,ATP1B3,CD44,DUSP1,EMC7,EXT2,FAS,HLA-A,HNRNPM,IFITM2,ITGB1,LAPTM4A,LGALS3BP,NFKB2,NUDT21,PCBP1,PFN1,PSMC3,PTBP1,RPL10,RPL18,RPN2,SLC1A5,SLC2A3,SLC35B2,SLC3A2,SNAP23,STOM,TARS,USP5
SATB1		transcription regulator		1.596		8.24e-08	ABTB1,ACTG1,CD40,CDKN1A,CEACAM1,CSF3R,CTNNA1,CTSD,CYBB,EBI3,EPSTI1,EVI2A,F5,FAM129A,FCGR1A,FEZ2,GLRX,HLA-DMB,HSP90AA1,HSPA8,HVCN1,IL10RA,IL16,IL18RAP,IL1R2,ILF3,IRF8,ITGB1,PSMD2,PTGES3,RELB,RPLP0,SUN2,TNFSF13B,TSC22D3,UHRF1,VIM,WARS,YPEL5
TCF4		transcription regulator		1.067	bias	9.18e-08	ANXA6,ASF1B,BCL6,BIRC5,CCNA2,CCNB2,CD55,CDC20,CDCA3,CDKN1A,CDKN3,CKAP4,Clec2d (includes others),CRELD2,DCK,DSTN,FGD2,FN1,H1F0,HCST,Hmgn2 (includes others),HSD11B1,HSP90B1,IFI16,JUN,Ly6a (includes others),MANF,MORF4L2,MYC,OPTN,PDIA4,PDIA6,PLAC8,PRDX4,RACGAP1,RCBTB2,SDF2L1,SERPINB1,SLC35B1,SPCS2,SUB1,TXNDC5,VCAN,XBP1	772 (19)
lith-O-Asp		chemical reagent		1.093		1.01e-07	CCT6A,CFL1,HNRNPA2B1,MMP9,OLA1,PGK1,PSMB1,PXN,RNH1,TRAP1
inosine		chemical - endogenous mammalian		1.874	bias	1.02e-07	AIF1,ANXA1,ANXA5,C3,CD63,CD68,CFB,EMP3,FTL,IFITM3,LCP1,LGALS3BP,Ms4a6b,Mt1,NPC2,SERPINB1,TSPO,TUBA1A,VIM
STAT3		transcription regulator		1.14	bias	1.11e-07	APEX1,ARG2,BATF,BCL6,BIRC5,C5AR1,CASP1,CAT,Ccl2,CCNB1,CCR1,CCRL2,CD40,CD74,CD9,CDKN1A,CDKN2D,CEACAM1,CEBPD,CFB,CLN6,COPS5,CTSB,CXCR2,CXCR4,EGR1,FAS,FCGR1A,FFAR2,FGL2,FN1,GADD45A,GPR65,HIST2H2AA3/HIST2H2AA4,HLA-A,HLA-DMA,HLA-DQA1,HLA-DRB5,HP,ICAM1,IFI16,Ifi202b,IFI30,IFI35,IFITM2,IFITM3,IL1B,IL1RN,IL6R,IRF5,ITGAM,ITGB1,ITGB2,JUNB,KLF4,Klrk1,LTF,MAFB,MMP9,Mt1,Mx1,MYC,NFKB1,NPM1,NRP1,OAS1,OAS3,PDIA4…	514 (18)
methylselenic acid		chemical reagent				1.12e-07	ATF3,AURKA,BIRC5,BLVRB,CCNA2,CCNB1,CCNB2,CD44,CDC20,CDK2AP2,CDK4,CDKN1A,CDKN2D,CENPA,DNAJC3,DPYSL2,ENPP5,ERCC1,ERP44,FN1,G3BP2,GADD45A,H1F0,HSP90B1,JUN,JUNB,KLF4,MANF,MAP2K1,MCM2,MCM3,MCM5,MCM6,MCM7,MXD1,MYC,NFKB1,PCNA,PDIA4,PLK1,PPP5C,RABAC1,RFC5,RGS10,RND3,RRM1,STX7,TAF6,TOP2A,TUBB4B,UBE2B	931 (21)
4-phenylbutyric acid		chemical - endogenous mammalian		0.169		1.14e-07	ABCD1,BCKDHA,CALR,CAMP,CASP8,CDKN1A,CDV3,CNP,EIF2S2,ELP2,GSN,GUSB,HLA-A,HSP90B1,HSPA4,HSPA5,LPAR6,MXD1,PARK7,PCNP,PSMA3,PSMC3,TCERG1,XBP1,YPEL5	455 (10)
cyclosporin A		biologic drug		0.535		1.21e-07	ADORA2B,AKR1B1,ANXA1,Arf2,ATF3,ATP1A1,BATF,BAX,CAMP,CASP1,CD14,CD40,CD44,CD55,CD68,CDK4,CDKN1A,CX3CR1,CXCR4,CYP27A1,EDNRA,EGR1,EIF4A3,EIF6,EMP3,F5,FAS,FN1,H2AFX,HSP90AA1,HSPA5,HSPD1,HTATSF1,ICAM1,IFNGR1,IL16,IL1B,ITGAL,ITGB7,JUN,LCN2,LGALS3,LXN,MCM3,MIF,MMP9,Ms4a6b,MTHFS,MYC,NDUFB6,NFKB1,NME1,PA2G4,PCNA,PDCD4,PKM,PREP,PSMB10,PSMB8,PSMC1,RBM3,REL,RFTN1,RPS17,S100A10,S100A9,SNRNP70,SOD1,SSR4,TFEC,T…	741 (18)
methapyrilene		chemical drug	Activated	2.024		1.45e-07	ACAA1,ACADL,ACTG1,ANXA5,ASS1,ATF3,ATP6V1B2,BCKDHA,BTG2,CAT,CST3,CTSB,CTSS,CTSV,DBI,EEF1A1,EIF2S1,GADD45A,HSPA5,IFRD1,ITGB1,MAP2K1,Mt1,MYC,NSFL1C,RIPK3,RPL13A,RPL27,RPS8,RPS9,SLC3A2,STMN1,TP53,TUBB
IRF8	1.359	transcription regulator		0.178	bias	1.45e-07	ASAH1,ATF3,B2M,BAX,BCL6,Ccl9,CCR2,CD14,CD37,CD40,CD74,CDKN1A,CEBPE,CFB,CSF1R,CSF3R,CTSS,CYBB,EGR1,FAS,ICAM1,IL1B,IRF5,IRF8,ITGAM,KLF4,MAFB,MMP9,MSR1,MYC,OAS1,TK1,TNFSF13B,TP53	501 (14)
CEBPE	-1.226	transcription regulator	Inhibited	-3.82		1.45e-07	CAMP,Ccl9,CD14,CDK4,CLEC10A,CSF1R,CSF3R,CTSV,IL1RN,ITGAM,LCN2,LTF,MMP8,MMP9,MYC,NCF1,Ngp,Orm1 (includes others),Retnlg
PML		transcription regulator		-1.578		1.53e-07	ACADL,ACTG1,AKR1A1,ANXA4,BAX,BIRC5,CACYBP,CAT,CDKN1A,CEBPE,CFL1,DNAJC9,FAS,FTL,GADD45A,HADHB,HLA-DMB,IL1B,MAP2K1,MCM6,NSFL1C,PRDX1,PSMB8,PSMB9,STIP1,STMN1,SUMO2,TP53,TXN,TXN2,UCP2,VIM,YWHAG	763 (23)
salmonella minnesota R595 lipopolysaccharides		chemical - endogenous non-mammalian		-0.136	bias	1.67e-07	ACSL1,ADAM9,ARHGAP25,Ccl2,Ccl6,CCRL2,CEBPD,EGR1,FPR1,FPR2,HLA-DMA,HLA-DMB,HLA-DQA1,ICAM1,IL1B,IRF8,JUN,JUNB,MCM2,Ms4a4b (includes others),NFKB1,NFKB2,PILRA,RELB,SAMHD1,Slfn1,SLFN12L,Slfn2,TFEC,Tnfsf9,VCAM1	675 (14)
MED30		transcription regulator				1.81e-07	Cox5b,CS,NDUFA10,NDUFB3,NDUFS2,NDUFS7,NDUFV1,SDHA,SDHB,SDHC,SDHD
HSP90B1	1.215	other	Activated	2.357	bias	1.98e-07	CALR,CANX,CD40,EIF5A,HSP90B1,HSPA5,IL1B,ITGAL,ITGB2,PPIF,RPL12,RPL27A,RPL30,RPLP2,RPS14,RPS20,SNX3,SSR3,SSR4,XBP1	455 (13)
forskolin		chemical toxicant		0.308	bias	2.03e-07	ARL6IP5,ATF3,ATP6V0B,ATP6V1A,ATP6V1B2,ATP6V1C1,AVPI1,BIRC5,BTG2,CALR,CAMP,Ccl9,CCNB1,CCNB2,CCND3,CD14,CD44,CD55,CD68,CD9,CDC42SE1,CDK4,CDKN1A,CDKN3,CEBPD,CEBPE,CNP,CRISPLD2,CTSV,CXCR4,CYFIP2,DHRS3,DUSP1,EBI3,ECM1,EGR1,EIF5A,EMD,ESD,FAS,FN1,FRRS1,GADD45A,GRN,GSTM5,GSTP1,H3F3A/H3F3B,HLA-DQA1,HLA-DQB1,HP,HSD11B1,HSPA1A/HSPA1B,ICAM1,IER2,Ifi202b,IL1B,INHBA,ITGA1,JUN,JUNB,KLF4,LAMP1,LITAF,LTF,MAP1LC3B…	605 (20)
NRF1		transcription regulator	Activated	3.011	bias	2.04e-07	ATP1A1,COX4I1,COX5A,Cox5b,COX6A1,COX6B1,Cox6c,COX7A2,COX7B,Cox7c,COX8A,CYCS,IL1RN,Mt1,SDHA,SDHD,SURF1,TP53,VDAC1
FN1	1.423	enzyme		0.836	bias	2.22e-07	AHCY,APLP2,BCL7B,BIRC5,CANX,CAPN2,CCT4,CDK4,CDKN1A,CLIC4,COPS5,CTSD,EIF2S3,EIF4B,EIF5A,FN1,G3BP1,G3BP2,GDI2,GPX1,IL1B,ITGA1,ITGAM,ITGB1,LAMP1,LIMS1,MAT2A,MAX,MMP9,MYC,PCNA,PLAUR,PSMC1,PTBP1,PXN,SDHC,SEC23B,SNAP23,SURF1,THBS1,TOR1A,UBE2B,VDAC1,VIM	878 (21)
WT1		transcription regulator		0.104		2.23e-07	AHCY,ANXA11,APLP2,APRT,ARL2,BTG2,CAPRIN1,CDKN1A,CLIC1,CLIC4,CMPK1,CSF1R,CTSV,EGR1,ETFA,EXT2,FDPS,FIBP,GSN,HSP90B1,IL1B,IRF8,ITGAM,JUNB,KLF4,LGALS3,LMAN1,MGST1,MMP9,MPP1,MYC,NME1,NUCB1,PDIA4,PLAUR,PPIB,Ptma (includes others),RARA,RPL19,SEC13,SLC2A3,SQLE,TARS,TCOF1,THBS1,TRAP1,WARS,WDR74	787 (20)
CLDN7		other		0.464		2.48e-07	ANXA3,APLP2,ARHGDIB,ATP5MC1,B4GALNT1,C3,CD68,CKAP4,DPM3,F5,GRINA,HIST2H2AA3/HIST2H2AA4,LAMTOR1,LGALS3,LTA4H,MCU,MMP9,MRPL36,MRPL40,MRPS15,MRPS17,NUDT21,PHGDH,PLGRKT,PSMG2,RPS7,RSL1D1,SERPINB1,SLC35B1,TINAGL1,WIPI1
ADORA2A		G-protein coupled receptor		1.262		2.68e-07	ATP2B1,Atp5e,ATP6V1B2,Ccl2,CCT5,Cd24a,CD81,CKB,CSF1R,DGAT2,DSTN,DUSP1,EEF2,EIF2S2,EIF5A,FBL,G3BP2,GDI1,GPI,HNRNPK,IFITM3,KLC1,MMP9,NAPA,P4HB,PEA15,PPP1CA,RAB6A,SSRP1,TIMM44,TSC22D3,TUBB2A,USP5	240 (7)
MAP4K4		kinase	Inhibited	-3.9	bias	3.14e-07	ACAA2,ACO2,ACSL5,ALDH3B1,APIP,BCAT2,Calm1 (includes others),CYC1,DHRS4,EIF4E2,GYS1,HADH,HADHA,HADHB,HSD3B7,MAFB,MGLL,NDUFA3,NDUFA5,NDUFAB1,NDUFS8,NDUFV1,OGDH,PAPSS2,PHYH,PON2,SUCLG1,UCK1,UQCRC1,UQCRFS1
EIF2AK3		kinase		1.337	bias	3.29e-07	ATF3,BTG2,Ccl2,CTSC,DNAJC3,EGR1,GADD45A,HSPA5,HSPA9,IL1B,JUN,KLF4,LMO4,MAP1LC3B,MYC,NARS,NFKB2,NUPR1,PON2,PPP1R15A,RELB,SARS,SHMT2,TARS,TP53,TXNIP,WARS,XBP1	459 (17)
phorbol myristate acetate		chemical drug		-0.636	bias	3.63e-07	ADAM15,ADAM8,ADAM9,AHSA1,AMER2,ANXA1,APRT,ARF4,AURKA,AURKB,BAX,BIRC5,BTG2,C3,C3AR1,C5AR1,CAPG,CAT,Ccl2,Ccl6,CCNA2,CCND3,CCR2,CD14,CD44,CD55,CD68,CDK4,CDKN1A,CDKN2D,CLDN1,CMPK1,CSF1R,CSF3R,CTSB,CTSD,CTSH,CTSV,CXCR2,CXCR4,CYBB,CYTH4,DEK,DENND3,DNAJC3,DUSP1,EBI3,ECE1,ECM1,EDF1,EEF1D,EGR1,EIF4A1,EIF4A3,EIF4E,EIF5A,EIF6,ERCC1,FAS,FCGR1A,FFAR2,GLRX3,GSTP1,HDC,HMBS,HNRNPF,HNRNPK,HPSE,HSD11B1,HSP90AB1,HS…	782 (19)
UCP1		transporter		1.643		3.76e-07	BCAT2,BCKDHA,BTF3,Cd24a,CD68,CDKN2AIPNL,CPNE2,CTSV,EEF1A1,EMB,GADD45A,GARS,GHITM,GPX3,GSTO1,Hmgn2 (includes others),IL1B,MYC,NDUFA10,NDUFB8,NDUFS3,NT5C,NUPR1,OAS3,PGD,PGLS,PHGDH,PSAT1,SDHB,SHMT2,SLC3A2,SND1,SRM,TXN2,UCP2,UQCRC1,UQCRC2
Hbb-b2		other		1.387	bias	3.95e-07	Ccl2,CCR2,CD44,CD74,CMTM3,CXCR2,CYBB,FN1,FTL,HFE,IL10RA,IL16,IL1B,ITGAM,LTB,LY86,TF	335 (9)
HSF1		transcription regulator		0.015		4.25e-07	AHSA1,B2M,BAX,CBX3,CCNA2,CCT2,CCT3,CCT4,CCT5,CCT6A,CCT7,CCT8,CKS1B,CUL1,FKBP4,FXR1,HSP90AA1,HSP90AB1,HSPA1A/HSPA1B,Hspa1b,HSPA4,HSPA8,HSPD1,HSPE1,ICAM1,IL1B,JUN,LSM2,MAT2A,MBOAT7,MRPL18,PGK1,RANGAP1,RPL22,SPR,ST13,STIP1,TCP1,TRA2B,VCAM1	809 (18)
IRF1		transcription regulator		1.643	bias	4.63e-07	ADAM8,B2M,BAX,CASP1,CASP8,CCNB1,CD40,CDK4,CDKN1A,CEACAM1,CFB,CTSS,CYBB,EIF4A3,FGL2,FPR2,HLA-G,IFI35,Ifi47,IFITM3,IL18BP,IL1B,IRF5,LTB,MMP9,MYC,OAS1,PCNA,PSMB10,PSMB8,PSMB9,PSME1,PSME2,SLPI,TNFSF13B,TP53,TRADD,VCAM1	437 (16)
CD40	0.296	transmembrane receptor		0.763	bias	5.09e-07	BAX,BCL6,BIRC5,CALR,Ccl2,CCNA2,CCND3,CD40,CD44,CDK4,CDKN1A,CUL1,CYSLTR1,DUSP1,FAIM,FAS,HLA-DQB1,HSP90B1,HSPA5,ICAM1,IL10RA,IL13RA1,IL1B,IL1RN,IL6R,ITGAL,ITGAM,ITGB1,ITGB2,JUN,KLF4,LGALS3,Ly6a (includes others),MMP9,MYC,NFKB1,NFKB2,PSMB10,PSMB9,REL,TNFRSF13B,TNFSF13B,TP53,VCAM1,XBP1	544 (17)
progesterone		chemical - endogenous mammalian		1.207		5.17e-07	ACAT1,ACOT7,ACSL1,ADH5,ATF3,ATP6V1B2,AURKA,BAX,BCL6,BSG,C3,C5AR1,CCNA2,CCNB1,CCNB2,CCND3,CCR2,CD40,CD82,CDKN1A,CDT1,CEBPD,CFB,CNDP2,COMT,CRCP,CSF3R,CST3,CTSV,CXCR4,EDNRA,EGR1,FAM49A,FEN1,FKBP3,FKBP4,FN1,GARS,GRINA,HDC,HLA-DQB1,HLA-G,HOPX,HSD11B1,HSD17B4,HSPA8,ICAM1,IDH2,IL6R,INHBA,ITGA1,ITGB1,JUN,KLF10,LCN2,LEPROT,LGALS1,LGALS3,LITAF,LTF,LXN,MCM2,MCM3,MCM5,MCM6,MCM7,MMP9,MYC,NCAM1,NCAPH,NME2,NOP1…	684 (19)
BMS-690514		chemical drug	Inhibited	-2.673	bias	5.8e-07	CCNB1,CCND3,CTSH,CYCS,DNAJC9,HSP90AA1,HSPA4,HSPA8,HSPE1,MCM3,MCM5,MCM6,MCM7,PCNA	578 (7)
methotrexate		chemical drug		0.434		6.25e-07	ABCD1,ACAA1,ACAA2,ACTG1,ADIPOR1,ANXA4,APEX1,ASS1,BTG2,C3,CDKN1A,CFB,CFH,CSF1R,CTSS,CTSV,CXCR2,CYCS,DGAT1,DGAT2,DUSP1,ECHS1,FAS,FKBP3,FPR1,FPR2,GPI,GSN,HADHA,HADHB,HSD11B1,HSD17B4,ICAM1,IL1B,ITGA1,LY96,Mt1,MYC,OSTF1,PHYH,PPIA,PRDX1,SLC31A2,SOD1,THBS1,TP53,VCAM1,ZFP36L1	521 (16)
dichlorovinylcysteine		chemical toxicant	Inhibited	-2.127		6.81e-07	ACAT1,AKR1A1,CDK4,ENO1,HAAO,HSPA9,PKM,PPA2,PRDX5,PSMA1,SORD,STIP1,TUFM
OSM	-1.169	cytokine		-1.619		6.91e-07	ACAA1,ACSL5,ADH5,ANXA1,ANXA3,ASAH1,B2M,BLMH,CAT,CBX3,Ccl2,CDKN1A,CEBPD,CLPP,COX6B1,COX7B,CTSH,CTSV,DHRS3,DHRS7,DNAJC3,ECM1,EMP3,ETFB,FN1,GAS7,GCA,GNS,HLA-A,HP,HSD11B1,HSPA5,ICAM1,IFI35,IFNGR1,IL13RA1,IL1B,IL1R2,IL6R,ITGAL,JUN,JUNB,KLF10,LCN2,LITAF,LRG1,LRRFIP1,LSM4,MCM7,MGLL,MMP8,MMP9,MYC,MYEF2,OAS1,OGDH,OSM,PCNA,PDCD4,PEPD,PGK1,PKIG,POLR2E,PRDX2,PREP,PSMB8,PSMB9,PYGL,RAD23A,RNASE4,S100A8,S100A9,…	753 (20)
PPARG		ligand-dependent nuclear receptor		1.993		7.93e-07	ACAA1,ACAA2,ACADL,ACSL1,ACSL5,AGPAT2,ALDH9A1,APH1A,ATP5PO,BAX,BCL6,BIN1,BIRC5,C3,CAT,Ccl2,CCPG1,CD40,CDKN1A,CS,CYCS,DGAT1,DGAT2,DHRS3,FABP5,FDPS,FN1,HADHA,HADHB,HEBP1,HP,HSD3B7,ICAM1,IDH1,IL1B,IL36G,INSIG1,JUN,KLF4,LAPTM4A,MBNL1,MCM7,MCTP1,MDH1,MGLL,MGST1,MMP9,MRTO4,MVD,NCF1,NDUFA5,NR1H2,NSF,PCNA,PDHB,PEA15,PEPD,PID1,PYGL,RPSA,S100a11,S100A8,SCARB1,SHISA5,Slc25a1,SLC27A4,SNX1,SOD1,TKT,TP53,TSC22D…	600 (21)
IKBKB	0.283	kinase		0.286	bias	8.32e-07	Acp5,ATF3,AURKB,BAX,C3,CASP8,Ccl2,Ccl9,CCNA2,CCR1,CD44,CDKN1A,CEBPD,CKS1B,CSF1R,CTSB,CTSZ,CXCR4,EGR1,FAS,GADD45A,GM2A,GRN,H2AFX,HLA-A,ICAM1,IFI16,IKBKB,IL1B,IL1RN,JUNB,KIF20A,KIF23,LCN2,LTB,MAT2A,MMP9,Mt1,MYC,NFKB1,NFKB2,NFKBIB,PLK1,REL,RELB,S100A4,Slfn2,TMEM176B,Tmsb4x (includes others),TNFRSF1B,TP53,VCAM1,VCAN	745 (15)
CHUK		kinase		0.97	bias	8.83e-07	Acp5,ARL6IP5,ATF3,C3,Ccl2,Ccl9,CCNB1,CCR1,CDKN1A,CEBPD,CTSB,CTSZ,FAS,GM2A,GRN,HLA-A,HSP90AA1,ICAM1,IFI16,IFI35,IL1B,IL1RN,JUNB,KLF10,LCN2,MAT2A,MMP9,Mt1,MXD1,MYC,NFKB2,NUMB,PCNA,PLK1,PLSCR1,RELB,Slfn2,TK1,TMEM176B,TNFRSF1B,TNFSF13B,TP53,VCAM1	681 (14)
desmopressin		biologic drug		-1.234	bias	9.7e-07	AHNAK,AKR1B1,ATP1A1,CAPG,CTSD,EIF4B,ENO1,H3F3A/H3F3B,HINT1,HSPA1A/HSPA1B,HSPA8,LMNA,PPIA,PPP2R5D,PXN,RPL23,RPS3,SEC61B,SNX3,STX7,TUBB,VDAC1,YWHAB,YWHAH,YWHAQ
TGM2		enzyme	Inhibited	-2.378	bias	9.77e-07	ATP1B3,BCL6,BTG2,C3,C5AR1,CCRL2,CD101,CD74,CEACAM1,CFP,CX3CR1,DDX60,FARSB,FFAR2,FN1,GCA,GM2A,HDAC3,HK3,IFI35,IL10RA,IL1B,ITGAM,LY6E,MAFB,MMP8,MMP9,MS4A3,MYC,NPC2,OAS1,OAS3,OLFM4,PADI4,PLSCR1,RARA,RPF2,S100A8,SAMHD1,SIRPA,SLPI,THBS1,TIMM8A,TP53,WDR3	843 (18)
MRTFA		transcription regulator	Activated	3.335		1e-06	CAMP,CD177,CEBPE,CLDN15,CNN2,COMT,CXCR4,CYFIP2,EGR1,FCN1,G0S2,GSTM5,HLA-A,ICAM1,ITGB1,LCN2,LTF,MAPK13,MGST2,MMP9,MOGAT2,MS4A3,MYH9,Ngp,PGLYRP1,PRSS57,PRTN3,S100A8,S100A9,SCARB1,SERINC3,SLPI	347 (10)
ACOX1		enzyme	Inhibited	-2.141		1.08e-06	ACAA1,ACADL,ACSL1,Akr1c12/Akr1c13,CAT,CD63,CDKN1A,CSTB,CTSV,GADD45A,GSTP1,HDAC1,HLA-DQA1,HLA-DRB5,HSD11B1,HSPA5,LCN2,LGALS3,LGALS3BP,MGLL,NUPR1,OAT,Orm1 (includes others),PLSCR1,RBM3,RPL12,Rpl36,RPS24,SELENBP1,TAGLN2,TP53,UCP2,XBP1	283 (7)
MAPK1		kinase		-1.773		1.13e-06	ARG2,ATF3,AURKA,BIRC5,CAPN2,CCNB1,CDKN1A,CFB,CRYL1,CTSB,DDT,DSE,DUSP1,EGR1,EMP1,ERCC1,ERP29,FN1,GMNN,H2AFV,HDC,HLA-DMA,HLA-E,IFI16,IFI35,IFITM3,IL1B,IL1RN,JUN,JUNB,LAP3,LGALS1,LGALS3,LGALS3BP,LMNA,MAPK13,MMP9,MVP,MYC,NKG7,NRP1,NT5E,NUPR1,OAS1,OAS3,OGFR,OSM,PHF11,PLSCR1,PLXDC1,PROS1,PSMB8,PSMB9,PSME2,SAMHD1,SUN2,TNFRSF1B,TP53,TRIM14,UBE2C,UBE2I,VIM	776 (20)
RABL6		other	Activated	3.714	bias	1.16e-06	AURKB,BTG2,CCNA2,CCNB1,CKS1B,FEN1,H2AFX,KIF23,MCM2,MCM5,MCM7,MYC,PARP2,PLK1,RFC3,TMEM97,TOP2A,TP53,UBE2C,VRK1	502 (7)
MTPN		transcription regulator		1.37	bias	1.16e-06	ANXA1,BAX,Calm1 (includes others),CASP8,Ccl2,CCNA2,CCNB1,CCNB2,CCND3,FAS,FN1,JUN,LTB,MIF,Mt1,MYC,NFKB1,S100A10,S100A6,S100A8,TNFRSF1A,TUBA1A,VCAM1	566 (9)
Il3		cytokine		-0.265		1.4e-06	CCND3,CD14,CD68,CDKN1A,CSF1R,CSF3R,EGR1,FAS,ITGAM,LCN2,LTF,Ly6a (includes others),MYC,OSM,PRTN3,SNAP23,SRP9,TCP1,TNFRSF1A,TNFRSF1B,TP53,YWHAG	779 (20)
JUN	0.929	transcription regulator		0.497	bias	1.44e-06	ACAT2,ANXA1,APEX1,ATF3,BAX,BTG1,C3AR1,CAMP,CAPN2,Ccl2,CCNA2,CCND3,CD14,CD44,CD68,CDC20,CDKN1A,COMT,CSF1R,CYCS,DUSP1,EEF2,EHD4,EIF4A1,ERCC1,FAS,FN1,GADD45A,GSTP1,HLA-G,HNRNPA2B1,ICAM1,IFI16,IL1B,ITGAM,ITGB1,JUN,JUNB,LAMP2,LGALS3,LMNA,MAT2A,MMP8,MMP9,MSR1,MVD,MYC,NCAM1,OSM,PADI4,PDCD4,PEA15,PLAUR,PRDX1,PTPRO,RARA,RELB,S100A10,SF3B3,SNRNP70,SNRPB2,Snrpg,STMN1,SULF2,TARBP2,TF,THBS1,TK1,Tmsb4x (includ…	838 (19)
SPI1		transcription regulator		-1.078	bias	1.51e-06	Acp5,BAX,BCL6,C3AR1,CCNA2,CCNB1,CCNB2,CD14,CD180,CD68,CDK4,CDKN1A,CEBPE,CHIT1,CSF1R,CSF3R,CTSS,CYBB,FCGRT,GPX1,HK3,HMBS,HSPA8,IFITM3,IL1B,IL1R2,IL1RN,ITGAM,ITGB2,JUN,KLF13,KLF4,LIMD1,LTF,LY6E,MYC,NCF1,PCNA,POLR1D,PRTN3,PSMB10,PSMB8,PSMB9,RPL18,TCP1,TFEC,TK1,TNFRSF14,TREM1,VIM	489 (15)
ZBTB33		transcription regulator		0.378	bias	1.65e-06	BAX,BCL6,BID,CDKN1A,FAS,MTA2,MYC,PGK1,S100A4	302 (5)
TP73		transcription regulator		0.543		1.65e-06	ADORA2B,AEN,ARL5C,ATF3,AURKA,B2M,BAX,BID,BIRC5,BTG2,C3,CASP1,Ccl2,Ccl6,Ccl9,CCNA2,CCNB1,CCND3,CD55,CDC20,CDKN1A,CDKN3,COX4I1,CTSD,DHRS3,EGR1,FAS,FEN1,FKBP1B,FN1,FXR1,G0S2,GADD45A,GRN,HPSE,HSPA1A/HSPA1B,IDH2,IL1B,IRF5,KIF22,KIF23,LAPTM4A,LCP1,LRG1,MCM6,MCM7,MYC,NCAM1,NFKB1,NRP1,NUPR1,P2RX4,POLD2,RAN,SHISA5,SNRK,Spink2,STMN1,THBS1,TNFRSF1A,TNFRSF1B,TP53,TREM2,UBE2C,UBE2V1,Wfdc17,YWHAB	793 (24)
MYD88		other		-1.333	bias	1.69e-06	ACSL1,BATF,C3,Ccl2,CCRL2,CD14,CD40,CD44,CEBPD,CLEC10A,CLIC4,DUSP1,Ear2 (includes others),EBI3,EGR1,FPR1,FPR2,HDC,HLA-A,HP,HSP90AB1,HSPA5,ICAM1,IL1B,IL1RN,INHBA,IRF8,ITGB7,JUN,MCM2,MMP8,MMP9,Ms4a4b (includes others),MSR1,MYC,NFKB1,NFKB2,PARP1,PARP2,PILRA,RELB,S100A8,SAMHD1,SCARB1,SLC16A3,TFEC,TNFRSF13B,TNFSF13B,Tnfsf9,VCAM1	514 (14)
PDX1		transcription regulator		-1.219		1.77e-06	ACTG1,AKR1B1,ATF3,Atp5e,ATP5PD,ATP5PF,CAT,Ccl2,CD44,CKB,CRELD2,CXCR4,Cyb5r3,EGR1,FH,GRN,GUSB,HSPA5,IDH1,IL1B,INSIG1,JUN,JUNB,KLF10,LTA4H,LXN,MDH1,Mt1,MYC,NDUFB9,NFKB1,PAPSS2,PCNA,PDIA4,PDIA6,PHGDH,SDHA,Slc25a1,TXNIP	720 (13)
6-hydroxydopamine		chemical toxicant	Activated	2.914	bias	1.84e-06	BAX,C3,CALR,CEACAM1,CEBPE,HSP90AB1,HSPA1A/HSPA1B,HSPA4,HSPA5,HSPA8,HSPA9,HSPBP1,IL1B,JUN,MMP9,NCAM1,P4HB,PDIA3,PPIB,PSMB2,PSMC4,TP53,VCP	474 (16)
IL10		cytokine		-1.248		1.86e-06	ARG2,BAX,CAMP,CASP8,Ccl2,Ccl6,CCND3,CCR1,CCR2,CD14,Cd24a,CD40,CD44,CD55,CD68,CDKN1A,CDKN2D,CEACAM1,CSF1R,CTSB,CTSS,CTSZ,CX3CR1,CXCR4,DUSP1,FAS,FCGR1A,FPR1,HLA-G,ICAM1,IKBKB,IL10RA,IL1B,IL1R2,IL1RN,ITGAL,ITGAM,ITGB7,JUN,LGALS1,LTB,LY75,MMP8,MMP9,MSR1,NT5E,OSM,PHGDH,PSMB9,S100A8,SCARB1,SLC9A3R2,SNAP23,TINAGL1,TNFRSF13B,TNFRSF1A,TNFRSF1B,TNFSF13B,TREM1,TSC22D3,TUBB4B,VCAM1,VCAN	543 (14)
mifepristone		chemical drug		-0.82		2e-06	ANXA1,ATF3,BAX,C3,CASP1,CASP8,Ccl2,CCR2,CD14,Cd24a,CD74,CDKN1A,CEACAM1,CEBPD,CTNNA1,CTSD,CYBB,DUSP1,EGR1,FAS,HDC,HLA-DQB1,HSD11B1,HSPA4,HSPA5,ICAM1,IL1B,ITGAM,JUN,JUNB,KLF13,KLF4,LTF,Ly6a (includes others),MAP4K1,MMP9,Mt1,MYC,NME2,NPM3,P2RX7,PCNA,PEPD,PGLYRP1,PSMA1,RARA,S100A6,SRM,SUMO1,TK1,TP53,VCAN,XBP1	888 (18)
NQO1		enzyme	Activated	2.706		2.05e-06	BAX,BIRC5,C5AR1,Ccl6,Ccl9,CCR1,CCR2,CDKN1A,CSF3R,CXCR4,FPR1,MMP9,TP53,VCAM1	636 (19)
N-formyl-Met-Leu-Phe		chemical reagent		-1.941	bias	2.21e-06	ACTL6A,CAPG,CORO1C,FCGR1A,IL1B,ITGAM,ITGB2,IVNS1ABP,KIF23,MMP8,NDE1,NFKBIB,OSM,RAC2,SIRPA,TAGLN2	893 (21)
ZBTB16		transcription regulator		-1.379		2.31e-06	BCL6,BID,Ccl2,CCNA2,CCR2,CD14,CD180,Cd24a,CD3D,CD44,CD55,CD74,CD81,CDKN1A,CLEC4C,EMB,F13A1,IFNGR1,IL10RA,IL18RAP,Klrk1,LMO4,LTB4R,Ly6a (includes others),LY86,LY96,MMP9,MYC,Nptn,SOX13,TMEM176B,TSC22D3	306 (10)
PLAU		peptidase		-0.325	bias	2.55e-06	C5AR1,Ccl2,FCGR1A,FN1,HLA-DMA,HSPA5,ICAM1,IFNAR2,IL1B,MMP9,OAS1,OAS3,PLAUR,RELB,S100A8,S100A9,SERPINB1,SLPI,TP53,VIM	787 (20)
deferasirox		chemical drug		0.419	bias	2.66e-06	ANKRD22,F13A1,GAS7,ITGAM,ITGB2,JUN,LY75,MS4A6A,PLD4,PRTN3,SULF2,TREML2,UBE2E1
fenofibrate		chemical drug		0.969		2.77e-06	ACAA1,ACAA2,ACADL,ACAT1,ACSL1,ACSL5,ADIPOR1,AP3M1,APEX1,CAT,Ccl2,CD40,CD68,CSF1R,DBI,DGAT1,DGAT2,ECHS1,EIF3E,GADD45A,GBE1,GOT2,HADHA,HADHB,HP,HSD17B4,HSPA5,ICAM1,IRF8,JUN,MGLL,NFKB1,NR1H2,PAICS,PCNA,PDHB,PLTP,PSMA4,SCARB1,SLC27A4,SOD1,SUCLG1,TIMM17A,TP53,TSNAX,TXNIP,UCP2,VCAM1,VPS29	567 (20)
ELAVL1		other		1.32	bias	3.21e-06	ANXA11,ARG2,ATF3,CDKN1A,CENPA,DGAT1,DUSP1,EIF4E2,MYC,NDUFB8,NXF1,PROM1,PSMB4,RFC5,RPL13,RPN2,RPS14,RPS6,SLC7A7,SRSF7,TAF9,TIMM17A,TOP2A,TP53,TRIOBP,TSC22D3	718 (21)
4-nitroquinoline-1-oxide		chemical toxicant		0.82	bias	3.46e-06	AURKA,AURKB,CCNA2,CCNB1,CCNB2,CDKN1A,EGR1,MMP9,TP53	502 (7)
SMARCB1	0.4	transcription regulator		-1.011	bias	3.5e-06	ACAT1,ACSL1,AURKA,BTG1,CCNA2,CD44,CDKN1A,CDT1,CEACAM1,CENPA,CXCR4,EIF4E,F10,FAS,FCGR1A,GADD45A,GMNN,GSN,HP,IFI16,IFNAR2,KIF23,MCM2,MCM3,MCM5,MYC,OAS1,OAS3,PGLYRP1,PLXNB2,RAB5B,RFC5,RND3,S100A1,SMARCB1,TP53	888 (24)
RPTOR		other		-1.435		3.55e-06	ACADL,BIRC5,CASP1,Ccl2,CDK4,COX4I1,CSF1R,EBP,ENO1,FCGR1A,FDPS,GPI,IL1B,IRF8,ITGAM,LY75,MVD,MYC,NLRP3,PKM,PYCARD,SQLE,TPI1	664 (19)
RNA polymerase II		complex				3.64e-06	Acp5,AGPAT2,ATP13A2,B2M,Ccl9,CCNB1,CCNB2,CD14,CD40,CD82,CDKN1A,CXCR4,DCTPP1,DUSP1,ENO1,EXOSC8,GADD45A,HCST,HLA-DQA1,HPRT1,HSPA1A/HSPA1B,ICAM1,Ifi47,IFNGR1,IL1B,IL1RN,JUN,JUNB,KPNA2,MAP2K1,MCM3,MMP9,MYC,OSGIN1,PCNA,POLB,PSMB9,RDM1,RND3,RPL10A,RPL12,RPL13A,RPS21,RPS3,RPS6,SDHC,Tmsb4x (includes others),TOP2A,TXN,WDR36	683 (13)
NR3C1		ligand-dependent nuclear receptor		-0.678		3.75e-06	ACAT1,ANXA1,ARRB2,B2M,BAX,BCKDHA,BCL6,BIN1,BTG1,CAPN2,CASP6,CAT,Ccl2,CDKN1A,CKS1B,COMT,CORO1C,CTNNBL1,CUL1,CXCR4,CYP27A1,DAD1,DBI,DGAT2,DNAJC15,DPP7,DUSP1,DUSP22,EGR1,ELMO2,EMP1,FAM89B,FKBP4,FN1,GADD45A,GPR65,GPX1,GPX3,GSTP1,HDAC1,HSD11B1,HSD17B12,HSP90AB1,ICAM1,IDH1,IER2,IKBKB,IL1B,IL36G,INHBA,IRF8,ITGB2,JUN,KLF13,LMO4,LTB,LYST,MAX,MMP8,MMP9,MSRB1,Mt1,MTCH2,Mx1,MYC,NFKB1,NFKB2,NFKBIB,NLRP3,NMT1,…	1092 (21)
ATF6		transcription regulator	Activated	3.478	bias	3.87e-06	AURKA,CALR,CDKN3,DNAJB11,DNAJC3,FDPS,HSP90B1,HSPA5,LMAN1,LMF1,MANF,MAP1LC3B,PDIA4,PRDX2,RAN,RHEB,SLC35B1,UBE2C,XBP1	670 (12)
TRIM24		transcription regulator	Inhibited	-3.555	bias	4.09e-06	Bst2,DDX60,EIF5A,EMB,EPSTI1,Ifi27l2a/Ifi27l2b,IFI35,Ifi47,IFNGR1,LGALS3,LGALS3BP,Ly6a (includes others),Ms4a4b (includes others),OAS1,PHF11,PLAC8,PSMB10,PSMB8,PSMB9,S100a11,SAMHD1,SHISA5,TGFBI,TP53,TRAFD1	255 (7)
Ifnar		group	Activated	3.747	bias	4.27e-06	B2M,Bst2,C3,CASP1,Ccl2,CD40,CD74,HLA-A,HLA-E,HLA-G,IFI16,IFI35,IFITM3,IFNGR1,IL1B,IRF8,MMP9,Mx1,NLRP3,OAS1,PSMB8,PSMB9,UNC93B1,VCAM1	469 (16)
FOLR1		transporter				4.27e-06	ARHGDIB,ATP6V1B2,BCAT2,CAT,Cd52,CD9,COQ7,DNASE2,GBA,GLRX,IK,NAP1L1,PDCD4,PFN1,RPS24,S100A4,SLC3A2,SNRPF,SORD,Srgn,SYNGR2,TAGLN2,TPI1,UBE2V1
AREG		growth factor	Activated	2.592		4.39e-06	AURKB,BIRC5,BSG,C3,CCNA2,CCNB1,CCNB2,CDC20,CDCA8,CENPA,CXCR4,EGR1,EMC10,HIST1H2BC,HIST2H2AA3/HIST2H2AA4,JUN,KIF20A,MMP9,PLK1,SAE1,SSBP1,SSRP1,TOP2A	857 (24)
SB203580		chemical - kinase inhibitor		-0.04	bias	4.94e-06	Acp5,ANXA1,ANXA3,ARHGDIB,ATF3,ATP5MF,BAX,BIRC5,C3,C3AR1,CAMP,Ccl2,CCNB1,CCRL2,Cd24a,CD40,CD55,CDKN1A,CEACAM1,CEBPD,CTSH,CX3CR1,DUSP1,EBI3,EGR1,ENO1,ERP29,FAS,FN1,FPR2,GADD45A,GDI2,GLRX,GPI,GSTP1,HSPA5,ICAM1,IFI35,IL1B,IL1RN,IL36G,ITGAM,JUN,JUNB,LIMS1,MAT2A,MMP8,MMP9,MXD1,MYC,NFKB1,NFKB2,OPTN,PLAUR,PPP1R15A,PRDX1,PSMB4,RBM3,REL,S100A10,SGMS2,SLPI,SNAP23,STK17B,THBS1,TMEM173,TP53,TRADD,TREM1,UCP2,V…	459 (13)
chrysotile asbestos		chemical toxicant	Activated	2.138	bias	5.15e-06	Ccl6,Ccl9,CCNB2,CDC20,CTSS,CTSZ,DNAJC3,HSP90B1,HSPA5,IL1B,PDIA4,TP53	678 (16)
bisphenol A		chemical - endogenous mammalian		0.175	bias	5.26e-06	ATG3,ATP5PO,BAX,C3,CDK4,CDKN1A,CTSD,EGR1,ENO1,Hnrnpa1,HSP90AB1,HSP90B1,HSPA1A/HSPA1B,IKBKB,LAMP2,LCN2,MAP1LC3B,MMP9,NUMB,PCBP1,PCNA,PEBP1,PKM,PRDX2,RPN2,SF3A3,SLC1A5,SNRPA1,Snrpe,SPG21,SRSF3,STK17B,TP53,TWF2	612 (23)
CDK4/6		group		-1.342		5.31e-06	AHNAK,C11orf58,CALU,EEF1B2,ENO1,FAM129B,G3BP1,LASP1,NOP58,PDLIM4,RPL10,RPL13,RPL27A,RPS6,SEC61B,TALDO1,TPI1,TUBA1B,TUBB,TUFM
CEBPB		transcription regulator		0.002	bias	5.55e-06	C3,Ccl2,CCNA2,CCNB2,CD14,CDKN1A,CDT1,CEBPD,CHIT1,CLEC4E,CLPP,COPS5,CSF1R,CSF3R,CTSC,CXCR4,DGAT2,DYNLT1,FAS,FTL,GADD45A,HDC,HIST1H4A,HLA-A,HP,HSD11B1,HSD17B4,HSP90AA1,HSPA8,HSPD1,HSPE1,ICAM1,IDH3B,IFITM3,IL18BP,IL1B,IL1RN,ITGAL,JUN,LCN2,LY96,MCM3,MSR1,MYC,NRP1,NUPR1,Orm1 (includes others),PCNA,PEA15,PLAUR,PPP1R15A,PRKCD,PRTN3,PSMA3,PSMA6,RAC2,RBBP7,SCARB1,SEC11A,TF,TMEM176A,TMEM176B,TNFRSF1A,TP53,…	487 (18)
guanidinopropionic acid		chemical - endogenous non-mammalian	Activated	3.987	bias	5.69e-06	ATP5MC1,ATP5PO,COX4I1,CYC1,CYCS,NDUFA1,NDUFA12,NDUFA3,NDUFA5,NDUFB2,NDUFB4,NDUFB8,NDUFS7,SDHA,SDHB,UQCRB
17-alpha-ethinylestradiol		chemical drug	Activated	2.761		5.99e-06	C3,Ccl2,CCR1,CCR2,CD68,CD74,CDKN1A,CFP,CKB,CSF1R,CTSS,CXCR2,EIF2S2,H2AFX,IFI16,IFI30,ISYNA1,JUN,LCN2,LY86,MANF,MMP9,NME1,PCNA,PRTN3,SCARB1,SCARB2,SESN1,SLC11A1,SLC25A5,SLC40A1,TRA2B,VCAM1	915 (20)
15-deoxy-delta-12,14 -PGJ 2		chemical - endogenous mammalian		0.105		6.02e-06	BAX,BIRC5,Ccl2,CCNB1,CDK4,CDKN1A,CEBPD,CTSB,CTSD,CYBB,EGR1,FKBP4,FN1,GADD45A,GSN,GSTP1,ICAM1,IL1B,ITGAM,JUN,KLF4,LAMP1,MAP1LC3B,MMP9,MSR1,MXD1,MYC,NFKB1,NFKBIB,PARP1,PRDX1,REL,SCARB1,SOAT1,SOD1,TP53,VCAM1	751 (17)
triamterene		chemical drug	Activated	2.508	bias	6.39e-06	ANXA1,CD14,CD44,EMP3,LCN2,LGALS3,LXN,MCM3,Ms4a6b,MYC,PSMB10,PSMB8,RBM3,RFTN1,S100A10,TMEM173,Tpm1,TUBB,VIM
Cyp2c23		enzyme		0.034		6.73e-06	Ccl2,CCNA2,CCNB2,CCR2,CX3CR1,F5,IL36G,ITGAM,Stfa2/Stfa2l1
glutamyl-Se-methylselenocysteine		chemical - endogenous mammalian		-1	bias	6.73e-06	ATP1A1,EGR1,GSTP1,JUN,PLAUR,PSMA7,PSME1,RPS11,SOD1
NFYA		transcription regulator		1.668	bias	6.78e-06	CALR,CAT,CCNA2,CCNB1,CCNB2,CDCA8,CDKN1A,EGR1,GADD45A,HLA-DQB1,HSPA5,ICAM1,JUN,JUNB,LMAN1,PADI4,PGK1,PKM,PPP1R15A,PTTG1,TOP2A,TXNIP	806 (18)
testosterone		chemical - endogenous mammalian	Activated	2.58	bias	7.06e-06	ACSL1,ANXA1,ANXA3,ARG2,ARRB2,ATP2B1,ATP5PB,BAX,BCL7B,CASP8,CAT,CDK4,CDKN1A,COX5A,CTSV,EGR1,EIF2S1,FAM89B,FAS,FN1,GADD45A,GDI2,GUSB,HDC,HNRNPK,HSP90AB1,HSPA1A/HSPA1B,HSPD1,IL1B,INHBA,ITGB1,JUN,LGALS1,MGST1,Mt1,MTA2,NFKB2,OAT,PARP1,PCNA,PDIA4,PSMA1,PSMA2,PSMB1,PSMC3,PXN,RAF1,RARA,RPL21,RPS11,SNRNP25,TF,THBS1,TK1,TOP2A,TUBB2A,UBE2B,VCAM1,VCAN,YWHAE	929 (20)
GFI1		transcription regulator		-1.964	bias	7.21e-06	BAX,CASP1,CASP8,Ccl2,CD40,CDKN1A,CEBPE,CXCR4,GUSB,HPRT1,HSP90AB1,ICAM1,IKBKB,IL1B,IL6R,JUN,MYC,NFKB1,NFKB2,NT5E,RAF1,REL,RELB,TNFRSF1A,TRADD	461 (14)
CD44	-0.351	other		0.043	bias	7.24e-06	ADAM8,ANXA11,BIRC5,CALR,Ccl2,CCR2,CD44,CD63,CDKN1A,CLEC5A,COMMD3,CX3CR1,Cyb5r3,ECM1,FAS,FKBP4,FN1,GADD45A,HSP90AB1,IFITM2,IL1B,IL1R2,IL1RN,JUN,LGALS1,LGALS3,Ly6a (includes others),MMP8,MMP9,MYBBP1A,MYC,NECAP2,NFKB2,PDCD4,TCIRG1,THBS1,VCAM1,VCP,VIM,WBP2	687 (15)
cisplatin		chemical drug	Activated	2.398		7.42e-06	ADAP2,ADRM1,ANXA1,ANXA4,ANXA5,ARHGEF10L,ASCC1,ATF3,BAX,BIRC5,BTG2,CAPN1,CAPN2,CASP1,CASP6,CASP8,CAT,Ccl2,CCNB1,CCR1,CD14,CD44,CDKN1A,CTSB,DHRS3,DUSP1,ECE1,EGR1,EMP3,ERCC1,FAS,FN1,G0S2,GADD45A,GOT2,GSTP1,H2AFX,HADHA,HSPA5,ICAM1,IDH2,IL10RA,IL1B,ISYNA1,ITGB1,JUN,LCN2,LGALS3,LIPA,LMNA,LMO4,LXN,MAP1LC3B,MCM3,Ms4a6b,Mt1,MYC,NCAM1,NCF1,OAT,PARP1,PDCD6,PEBP1,PFKL,PHGDH,PLK1,PLXNB2,PPIA,PSMA1,PSMB10,PSMB…	950 (22)
IRF3		transcription regulator		1.954	bias	7.46e-06	ADAM9,AHNAK,ANXA4,ARG2,B2M,BC147527,Bst2,Ccl2,CCRL2,CD40,CLIC4,DDX60,FAS,FCGR1A,FN1,IFI16,Ifi27l2a/Ifi27l2b,Ifi47,IFITM3,IL1B,IRF5,JUNB,Klrk1,LCN2,MMP9,Ms4a4b (includes others),Mx1,OAS1,OAS3,PHF11,PLAC8,PNP,POLR3C,RPS7,Slfn1,SORL1,TMPO,TREX1,VIM	392 (16)
deferoxamine		chemical drug		0.647	bias	7.46e-06	ANKRD22,CAMP,CCNB1,CCND3,CD14,CDKN1A,DUSP1,ECM1,EGR1,ENO1,F13A1,GADD45A,GAS7,HSPA1A/HSPA1B,ICAM1,IFI16,ITGAM,ITGB2,ITGB7,JUN,LCN2,LY75,MAP1LC3B,MS4A6A,MYC,NFKB1,NFKB2,PGK1,PKM,PLAUR,PLD4,PROM1,PRTN3,SLC2A3,SULF2,TP53,TREML2,UBE2E1,VCAM1	611 (18)
bezafibrate		chemical drug	Activated	3.547	bias	7.67e-06	ABCD1,ACADL,ACSL1,ACSL5,APEX1,CAT,CCNB1,CDK4,COX4I1,CS,DBI,ECI1,HADHA,HADHB,HSD17B4,HSPA5,INSIG1,LGALS3,MGLL,MPG,NPC2,PCNA,TSPO,UCP2	430 (16)
ADRB		group		-0.876		7.7e-06	ACAT2,ANXA5,ATF3,BAX,CASP6,Ccl2,CCNA2,CD40,CD68,CDK4,CDKN1A,FAS,FDPS,GADD45A,HSD3B7,HSPD1,ICAM1,IDH1,INSIG1,JUN,JUNB,KLF4,MMP9,MVD,NPM3,PCNA,PCYT2,RAN,SLC40A1,SLC9A3R2,SRM	865 (19)
thapsigargin		chemical toxicant	Activated	2.108	bias	7.93e-06	ADIPOR1,ATF3,BAX,BCL6,C5AR1,CALR,CAMP,Ccl2,CDKN1A,EGR1,EIF2A,EVI2A,FN1,GADD45A,HDC,HSP90B1,HSPA5,HSPA9,ICAM1,IER2,IFNAR1,IL1B,ITGB2,JUN,KLF4,LMAN1,LMAN2,MMP9,MYC,PCNA,PPP1R15A,RETSAT,SRI,TP53,VCAM1,XBP1	605 (19)
allopurinol		chemical drug	Activated	2.985	bias	8.34e-06	ANXA1,CAT,CD14,CD44,EMP3,IL1B,LCN2,LGALS3,LXN,MCM3,Ms4a6b,MYC,PSMB10,PSMB8,RBM3,RFTN1,S100A10,TMEM173,Tpm1,TUBB,TXNIP,VIM	449 (17)
methylnitrosourea		chemical toxicant				8.65e-06	ATP1A1,ATP1B3,AURKA,EGR1,GSTP1,JUN,PCNA,PLAUR,PSMA7,PSME1,RPS11,RPS12,SOD1	767 (22)
AKT1	-0.296	kinase	Activated	3.323	bias	8.66e-06	ACAT2,ARL6IP1,ASS1,ATP5MC1,ATP5MC3,AURKB,BAX,BIRC5,Ccl6,Ccl9,CCND3,CD40,CD74,CDK4,CDKN1A,CEBPD,CST3,CTSV,CXCR4,EBP,EGR1,ENO1,FABP5,FAS,FN1,GATM,GOSR2,GOT2,GSTM5,HNRNPM,ITGB1,LCN2,LIPA,MDH1,MMP9,MSR1,MYC,NFKB1,NFKB2,PKM,SIVA1,SLC3A2,STUB1,THBS1,TK1,TP53,UBE2C,UBE2L3,VCAN,VCP,VIM	744 (18)
Interferon alpha		group		1.341	bias	9.58e-06	ANXA5,ASCC2,ATF3,B2M,BCL6,Bst2,BTG2,C3,C3AR1,CASP1,CASP8,CCND3,CCR1,CD40,CD81,CDKN1A,CDKN2D,CEACAM1,DYNLT1,EPSTI1,FAS,FBXO6,FCGR1A,HLA-A,HLA-G,HSPA1A/HSPA1B,ICAM1,IFI16,IFI35,IFITM2,IFITM3,IFNAR1,IFNAR2,IL10RA,IL18RAP,IL1B,IL1RN,IL6R,IRF5,IRF8,ITGAM,ITGB1,LAP3,MCRS1,Mx1,MYC,NKG7,NPM1,NPM3,NT5E,OAS1,OAS3,PHF11,PLSCR1,PSMB8,PSMB9,PTBP1,RBCK1,S100A9,SERPINB1,SLC1A5,SLC2A3,Slfn1,SLFN12L,Slfn2,TNFSF13…	474 (16)
cadmium chloride		chemical toxicant	Activated	2.044	bias	1.02e-05	ANXA5,EEF1D,EIF3I,EIF4E,GADD45A,HP,HSP90AA1,HSPA5,JUN,MCM7,Mt1,MYC,Orm1 (includes others),PCNA,TP53,TXN	893 (19)
Ptprd		phosphatase		-1.414	bias	1.07e-05	BIRC5,Ccl2,Ccl6,CDKN1A,CEBPD,IFI35,MYC,PSMB9	297 (7)
IFNA2		cytokine	Activated	2.31	bias	1.08e-05	ALOX5,ANXA1,B2M,BAX,BIRC5,CDKN1A,CEACAM1,CNP,DAD1,DDX60,FAS,HLA-A,HLA-E,IFI16,IFI35,IFITM2,IFITM3,IFNAR2,IL1B,IRF5,LGALS3BP,LPAR6,LY6E,MAP2K1,MMP9,MYC,NT5E,OAS1,OAS3,OGFR,PHF11,PLSCR1,PPP1CA,PSME1,PTTG1,RASSF1,SAMHD1,THEMIS2,TNFRSF1A,TP53,TREX1,TRIM14,VCAM1,XBP1	596 (18)
PITX2		transcription regulator		-1.384		1.09e-05	ATP1A1,CCND3,EGR1,F10,GADD45A,IDH2,ITGB1,MSRA,MYC,NDUFA13,NDUFB3,NDUFB4,NDUFB8,NDUFC1,NDUFC2,NDUFS2,NDUFS3,NDUFS7,NDUFS8,NMRAL1,PRDX2,PYCR2,SDHC,SOD1,TXN2,UQCRQ,VIM,ZEB2	688 (13)
vincristine		chemical drug		-0.447		1.13e-05	CDKN1A,EGR1,FAS,H2AFX,HNRNPF,HNRNPK,HSP90AB1,IL1B,JUN,LCP1,NCAM1,TP53,TUBB2A,YWHAE,YWHAQ	708 (18)
IFRD1	-0.305	other	Inhibited	-3.44	bias	1.17e-05	CTSZ,DGAT1,DGAT2,EBP,MYC,NDUFA6,PPIA,PTTG1,RPL22,RPL39,TK1,TOR2A
selenomethylselenocysteine		chemical - endogenous mammalian		-1.265	bias	1.17e-05	ATP1A1,ATP1B3,EGR1,JUN,PLAUR,PSMA7,PSME1,RPS11,RPS12,SOD1
IRF2		transcription regulator		0.237	bias	1.21e-05	ARCN1,B2M,CASP1,CD14,CDKN1A,CEACAM1,CFB,CLIC1,CTSS,EXOSC3,IDH1,IFI35,Ifi47,IL1B,IRF8,LCN2,MYH9,OAS1,PSMB10,PSMB8,PSMB9,PSME1,PSME2,SUPT16H,TMEM256,TNFSF13B,VCAM1	403 (17)
NCSTN		peptidase		-0.277	bias	1.24e-05	APH1A,Ccl9,CD14,CD68,CEBPD,CSF1R,GRN,IRF8,Ly6a (includes others),NCF1,S100A1,TREM3,VIM	704 (7)
gentamicin C		chemical drug	Activated	2.357	bias	1.25e-05	ANXA1,CD14,CD44,EMP3,LCN2,LGALS3,LXN,MCM3,Ms4a6b,MYC,PSMB10,PSMB8,RBM3,RFTN1,S100A10,Tpm1,TUBB,VIM
JAK2		kinase		0.906	bias	1.28e-05	BAX,CASP1,Ccl2,Ccl9,CDKN1A,CYBB,DCXR,EGR1,F10,F5,ICAM1,IL1B,LAT2,LCN2,LY6E,MYC,MYL12A,Neat1,NKG7,OSM,PFN1,PSMB9,RARA,SET,SLC11A1,THBS1,TP53,TRAM1	661 (18)
resveratrol		chemical drug		-0.379		1.28e-05	AIF1,ALOX5,ATF3,BAX,BIRC5,BSG,Ccl2,CCNB1,CD14,CD68,CDK4,CDKN1A,CNBP,COX4I1,CS,CSF1R,CX3CR1,CYBB,CYP4F2,ECE1,EGR1,FAS,FN1,GPX1,HSPA5,ICAM1,IL1B,ITGA1,ITGAL,JUN,LITAF,MALAT1,MAP2K1,MMP9,MYC,NCOA4,NDUFA13,NDUFA2,NDUFB8,NFKBIB,PCNA,PDCD4,PPP1R15A,PSMB5,RAN,SOD1,TP53,UQCRC2,VASP,VCAM1,XBP1	761 (18)
IFN alpha/beta		group	Activated	2.549	bias	1.29e-05	BAX,BID,CCR2,CCRL2,CD40,CLEC10A,FGL2,GAS7,HLA-A,IFI16,Ifi27l2a/Ifi27l2b,IRF8,Ly6a (includes others),LY6E,Mx1,SLPI,TNFSF13,TNFSF13B,TREM1,TREM3,Treml4	724 (18)
fenamic acid		chemical reagent	Activated	2.398	bias	1.3e-05	ANXA1,CD14,CD44,EMP3,LCN2,LGALS3,LXN,MCM3,Ms4a6b,MYC,PSMB10,PSMB8,RBM3,RFTN1,S100A10,TMEM173,Tpm1,TUBB,VIM
let-7a-5p (and other miRNAs w/seed GAGGUAG)		mature microRNA	Inhibited	-2.751	bias	1.39e-05	AARSD1,AURKB,BIRC5,BSG,CAPG,CARHSP1,CIAO2A,COMMD9,CSDE1,DAD1,DUSP12,GEMIN7,GYS1,IFRD1,ITGA1,LIN28A,MMP9,MRPS24,MRPS33,MYC,POLD2,POLR2C,RHOG,S100A4,SCYL1,SIGMAR1,SNAP23,SPCS3,THBS1,TRMT1,UHRF1,VIM	304 (7)
VHL		transcription regulator		-0.618		1.54e-05	AIF1,CDKN1A,CFL1,COPS5,CXCR4,FN1,FTL,GBE1,GLO1,GPX1,H2AFX,HNRNPA2B1,IFITM3,LMNA,MAVS,MIF,NOSIP,PCNA,PISD,PPIL1,RPS6,SEC61G,SLC16A3,SLC40A1,TP53,UQCRQ,VCAM1,VIM,ZFP36L1	595 (17)
TNFSF13B	-0.559	cytokine		1.515	bias	1.59e-05	ARCN1,BAX,BCL6,CD40,CDK4,CTSS,GPR183,HLA-DMB,HLA-DQA1,ICAM1,JUN,MMP9,MYC,NFKB2,PLK1,RELB,TFG,TP53	439 (14)
dihematoporphyrin ether		chemical drug		1.353	bias	1.61e-05	CDKN1A,DUSP1,HSP90B1,HSPD1,RAF1,TP53	218 (7)
bromobenzene		chemical toxicant		0.022		1.63e-05	CAPN1,CDKN1A,CTSV,FDPS,GADD45A,GSTP1,HSP90AA1,HSPA5,JUN,LAP3,Mt1,MYC,NFKB1,PPP1R15A,RPL22,RPL28,RPL35,TUBA1A,YWHAQ
decitabine		chemical drug		1.731	bias	1.67e-05	ALOX5,ARHGDIB,B2M,BAX,BTG1,CASP8,Ccl2,Ccl9,CCNA2,CCND3,CCR2,CD44,CD9,CDKN1A,CDKN2D,COMT,COPA,CX3CR1,CXCR4,DNAJC15,DUSP1,EEF1A1,EEF1B2,EEF1G,EIF3F,FAS,FN1,GLRX,GPX1,GSN,GSTP1,HLA-E,HPRT1,HPSE,HSPA1A/HSPA1B,IFI16,IFI35,IL1B,IPCEF1,ITGA1,JUNB,KLF4,LGALS3,LXN,LY96,MAFB,METAP2,MGST3,MMP9,MYC,MYEF2,NME1,OAS1,PABPC1,PCNA,PDLIM4,PTPRO,RASSF1,REL,RNASE4,RPL11,RPL26,RPL37,RPL4,RPL9,RPS13,RPS25,RPS6,S100A10…	792 (21)
ONECUT1		transcription regulator				1.79e-05	ABCB8,APIP,ARL1,BCKDHA,CCT8,CEBPD,COPB2,COPS7A,COX4I1,COX7A2L,DHRS4,EIF4A1,EMG1,EXOSC5,FABP5,FAS,G3BP2,HBP1,HIST1H4A,HLA-G,HNRNPA2B1,HNRNPR,HSD17B4,HSPA1A/HSPA1B,LRRC59,LSG1,MDH1,MFSD1,MGST3,OAT,OGFR,PFKL,PHB2,PIH1D1,POLR2D,PPP1R3D,PSMA1,PSMB1,SAMHD1,SH3BGRL,SNRPD2,SNX3,SUPT16H,TAOK3,TMBIM6,TXNDC12,UTP3,VCP,YPEL5
MAX	-0.816	transcription regulator		-0.932		1.84e-05	APEX1,BAX,BCL6,Ccl6,CCNB1,CDK4,CDKN1A,CSDE1,CYCS,DKC1,GADD45A,KLF10,LAMP2,MYC,NPM1,RBBP7,SCPEP1,SERINC3,SLC2A3,TMEM126A,TXNIP,UBE2C	479 (4)
vancomycin		biologic drug		1.525	bias	1.84e-05	ANXA1,C3,CAT,CCS,CD14,CD44,EMP3,LCN2,LGALS3,LXN,MCM3,Ms4a6b,MYC,PSMB10,PSMB8,RBM3,RFTN1,S100A10,TMEM173,Tpm1,TUBB,VIM
PSEN2		peptidase		0.141		1.91e-05	ACSL1,ANXA5,ANXA6,BAX,C3AR1,CAP1,CCS,CD74,CD9,COX4I1,COX5A,COX7A2,COX8A,CTSC,CTSS,CTSZ,CYTIP,DHRS7,EMP1,Erdr1,HLA-E,NDUFS8,PSTPIP1,TP53	815 (20)
emodin		chemical drug		-0.272	bias	1.92e-05	BAX,BIRC5,Ccl2,CCR1,CDKN1A,CSF1R,CXCR4,ERCC1,FN1,HSPA5,ICAM1,IL1B,IRF5,MMP9,SOD1,VCAM1,VIM	785 (17)
SREBF1		transcription regulator	Activated	3.161	bias	1.93e-05	ACSL1,ACSL5,ARF4,ATOX1,BAX,C5AR1,CAPZB,CD14,CDK4,CDKN1A,CEBPD,CYCS,CYP4F2,DBI,ETHE1,FABP5,FAS,FDPS,FN1,GPX3,HFE,HSPA1A/HSPA1B,HSPA5,IDH1,IFI30,IL1B,IL1R2,IMMT,INSIG1,LGALS3,MVD,NUPR1,OAT,PLTP,RPLP0,RPS24,SCARB1,SQLE,SUCLG1,TF,TMEM97,TNFRSF1B,TP53,UCP2,UQCRFS1	881 (19)
EDN1		cytokine		0.016	bias	2.02e-05	ANXA1,ANXA4,ANXA5,ANXA6,CST3,CXCR4,CYBB,EDNRA,EGR1,FN1,GRN,HSPA5,HSPA8,ICAM1,INHBA,ITGAM,ITGB1,JUN,JUNB,MAP2K1,MARCKSL1,MMP9,MYC,NCF1,NPM1,PDIA6,PLAUR,PRKCD,PXN,RPSA,SOD1,THBS1,TP53,TPT1,VCAM1,VCAN,VIM,YWHAE	715 (17)
ATM		kinase		1.703	bias	2.03e-05	BAX,CDK4,CDKN1A,CDKN2D,DUSP1,FAS,FN1,GADD45A,H2AFX,HSP90AA1,HSP90AB1,HSPE1,JUN,PCNA,PPP2R5D,PSMC4,PSME2,RRM1,TP53	804 (21)
SOD1	1.385	enzyme		0.294		2.13e-05	ADORA2B,APEX1,ASS1,ATP1A1,B2M,BAX,BID,C5AR1,C5AR2,CASP1,CD14,CDK4,CKB,COMT,CSF1R,DCXR,GPX3,GSTM5,GSTP1,GUK1,HSPA4,HSPA8,ICAM1,IL1B,INHBA,JUN,JUNB,MMP9,MRPS10,Mt1,P2RX4,P2RX7,P2RY6,PSMB5,PSMB8,RBM3,Rplp1 (includes others),SKP1,SLC40A1,SOD1,STIP1,STMN1,Tmsb4x (includes others),TP53,VCAM1	751 (20)
SLC29A1	0.337	transporter		-0.213	bias	2.15e-05	BAX,CDKN1A,FAS,GADD45A,ITGB1,RPL10A,RPL3,RPS27L,SESN1
ZFHX3		transcription regulator				2.22e-05	DOHH,EIF3K,GSTP1,HLA-A,IFITM3,MIF,NDUFS7,PLA2G7,POLR2I,PROK2,PTTG1,RASL11B,RPL37,Rplp1 (includes others),RPLP2,RPS12,RPS14,RPS28,SSB,TUBA1A,TUBA1B,UQCR10
THBS4		other	Activated	2.75	bias	2.31e-05	CALR,Ccl2,CD40,CRELD2,HSPA5,ICAM1,MANF,MMP8,P4HB,SDF2L1,VCAM1	168 (5)
zVAD-FMK		chemical - protease inhibitor		-1.048		2.42e-05	ANXA5,BIRC5,CASP1,CCND3,CD40,CDK4,CDKN1A,Gm21596/Hmgb1,IL1B,MAP1LC3B,PSMB9,TP53,VCAM1	392 (15)
ATP		chemical - endogenous mammalian		-0.557	bias	2.44e-05	BAX,BIRC5,CAPN1,CAPN2,CASP1,Ccl2,CD14,CLDN1,CXCR4,DUSP1,H2AFX,ICAM1,IL1B,IL1RN,ITGAM,LCN2,MYC,NRP1,P2RX4,P2RX7,THBS1,TNFRSF1B,TP53,TXN,VCAM1	682 (19)
TERC		other				2.46e-05	AURKA,CASP1,CDC20,CDKN1A,EGR1,Erdr1,GPI,H1F0,Ngp,Orm1 (includes others),S100A9,TUBB2A	285 (7)
PPARGC1A		transcription regulator	Activated	4.657	bias	2.52e-05	ACADL,ACAT1,ATP5F1A,ATP5F1B,ATP5MF,ATP5PD,ATP5PO,BAX,BCAT2,C3,CAT,CD68,CDKN1A,CEBPD,COX4I1,COX5A,Cox5b,COX7B,CS,CYCS,DGAT1,GOT2,GPX1,IDH3A,IL1RN,INSIG1,LIPA,MCM3,MCM5,MCM6,NDUFB5,NDUFS8,NDUFV2,PDHA1,PHYH,PRDX3,PRDX5,SCARB1,SDHA,SOD1,TP53,TXN2,UCP2,UQCRFS1	724 (18)
minocycline		chemical drug	Inhibited	-2.161	bias	2.52e-05	ALOX5,ATF3,BAX,BSG,CASP1,CASP8,Ccl2,CCR2,CDK4,ICAM1,IL1B,IL6R,ITGAM,ITGB1,SLC3A2,TNFRSF1A,TNFRSF1B,TP53,VCAM1	447 (13)
2-bromoethylamine		chemical reagent		1.72	bias	2.66e-05	ANXA1,CD14,CD44,EMP3,LCN2,LGALS3,LXN,MCM3,Ms4a6b,MYC,RBM3,S100A10,TMEM173,TUBB,VIM
etoposide		chemical drug		0.4	bias	2.67e-05	ATF3,BAX,BIN1,BIRC5,CCNB1,CD40,CDK4,CDKN1A,CREG1,CTSD,CYCS,DUSP1,EEF1A1,EEF1B2,FAS,GADD45A,H2AFX,ICAM1,IL1B,JUN,LPAR6,MYC,NFKB2,PCNA,PEBP1,PFKL,RAN,REL,RELB,SLC2A3,TAF6,TK1,TNFRSF1A,TOP2A,TP53,TRADD,UHRF1	653 (16)
PRKAG3		other				2.69e-05	ATP6V1A,BTG2,CD55,CTNNA1,CYP27A1,EGR1,EIF4B,EIF4E2,FBXO6,FTL,GBE1,GLRX,GPX3,HFE,HIST2H2AA3/HIST2H2AA4,HSPA5,IFI30,JUNB,KLF4,MAT2A,MID1IP1,NAP1L1,RGCC,RPL12,RPL13A,RPL22,RPL5,Rps3a1,SLC2A3,SLC40A1,SLC44A2,SORD,ZEB2
ATF4		transcription regulator	Activated	3.369	bias	2.74e-05	APEX1,ATF3,CALR,CANX,CDKN1A,CYP27A1,EIF2S2,GADD45A,GARS,GHITM,GYS1,HSP90B1,HSPA5,JUN,KLF4,LGALS3,MAP1LC3B,MGST1,MID1IP1,MRPS7,NARS,NUPR1,PHGDH,PPP1R15A,PSAT1,SARS,SHMT2,SIGMAR1,SLC1A5,SLC3A2,TKT,WARS	697 (13)
EIF2AK2		kinase		0.857	bias	2.95e-05	ATF3,BAX,BIRC5,CDKN1A,CEBPD,EGR1,FAS,Hspa1b,IFI35,IFITM2,IL1B,LGALS3BP,MMP9,MYC,NFKB2,OAS1,OAS3,PLSCR1,PPP1R15A,PSMB10,SAMHD1,TP53,TUBA1A	543 (18)
SAFB2		other		-0.632	bias	2.97e-05	B2M,BCCIP,EIF4B,HEXA,HLA-E,JUN,PSMB9,RPL35A,UBE2B,UQCRC2
methyl methanesulfonate		chemical toxicant		0.377	bias	3.02e-05	ATF3,BTG1,BTG2,CDKN1A,CTSD,EGR1,GADD45A,HPRT1,JUN,KLF4,PLXNB2,TP53,VIM,XPC	823 (20)
nitric oxide		chemical - endogenous mammalian		0.059		3.12e-05	ATF3,BAX,BIRC5,CD44,CDKN1A,CTSH,DUSP1,ECE1,EGR1,FAS,GADD45A,GSTP1,HPRT1,HSP90AA1,HSP90AB1,IL1B,JUN,JUNB,MGST1,MMP9,Mt1,MYC,NCAM1,PDIA4,PRDX5,SOD1,THBS1,TK1,TNFSF13,TNFSF13B,TP53,UBE2C	658 (16)
SLC13A1		transporter	Inhibited	-2.558		3.21e-05	ACSL5,ACTG1,COPB2,EEF1G,EFTUD2,G0S2,HLA-DMB,HSPA5,HSPA8,INSIG1,MAD2L2,MRGPRX3,Mt1,MVD,RPL41,RPL8,Rplp1 (includes others),RPN1,SDF2L1,ST13,TFG,XBP1	239 (7)
ethionine		chemical toxicant		0.832	bias	3.32e-05	ANXA1,CD14,CD44,LCN2,LGALS3,MCM3,Ms4a6b,MYC,PSMB10,PSMB8,S100A10,SLC25A3,Tpm1
methylnitronitrosoguanidine		chemical toxicant		0.035	bias	3.4e-05	BAX,BTG1,BTG2,CDKN1A,CEACAM1,EGR1,FAS,GADD45A,KLF10,POLB,TP53	791 (24)
glutamine		chemical - endogenous mammalian		-0.541		3.51e-05	ASS1,BSG,DNAJA2,DUSP1,FABP5,FN1,GADD45A,HSPA1A/HSPA1B,HSPA5,ICAM1,IDH1,JUNB,KLF4,MYC,NFKB2,PCNA,PHB,PROM1,TIMM17A,TP53,VIM,WARS,XBP1	701 (20)
7-ketocholesterol		chemical - endogenous mammalian		-0.333		3.58e-05	BAX,CYBB,EGR1,FDPS,HSPA5,ICAM1,ITGAL,SCARB1,TP53	410 (21)
Pam3-Cys-Ser-Lys4		chemical reagent		0.429	bias	3.61e-05	BATF,CASP8,Ccl2,CCR1,CCR2,CD180,CD40,CD55,CLDN1,CSF1R,CXCR2,EBI3,HLA-A,HLA-DRB5,ICAM1,IL1B,ITGB7,JUN,KDM6B,LTB,MMP9,NFKB1,NLRP3,RAE1,REL,RELB,SLC16A3,SLC40A1,TNFSF13B,Tnfsf9,Wfdc17	534 (15)
wortmannin		chemical - kinase inhibitor		-0.599	bias	3.76e-05	ATF3,BAX,BIRC5,Ccl2,CCND3,CD14,CD44,CDKN1A,CDKN2D,CEBPD,CKB,EGR1,EIF1AX,FN1,G3BP1,GSTP1,ICAM1,IL1B,IRF8,ITGAM,JUN,M6PR,MMP9,MSR1,MYC,NFKB1,NT5E,OGT,PCNA,PXN,RAP1A,RETSAT,SCARB1,TP53,TPI1,VCAM1,VIM	707 (16)
CREB3		transcription regulator		0.274		3.85e-05	ANXA1,CANX,CCND3,FKBP4,HSPA5,INSIG1,MMP9,XBP1
BDNF		growth factor		-1.487		3.89e-05	ACOT7,ANXA5,APEX1,ATP5MC2,BID,CDKN1A,CXCR4,DUSP1,EEF1D,EEF2,EGR1,FAM49A,FTL,GDA,GPS1,HADHA,HSD17B12,HSD17B4,HSPA5,IFRD1,JUN,KLC1,KLF10,LCN2,LGALS1,MALAT1,MVD,NCAM1,PCNA,PLTP,PLXNB2,PREP,PTBP1,REEP5,RNH1,RPL13,Rpl23a,RPL35A,RPL37A,RPS23,S100A10,S100A9,SFR1,SORL1,THBS1,TMBIM6,TMED2,Tmsb4x (includes others),TUBA1A,TXNIP,VIM,YWHAG	761 (20)
MAP3K14		kinase		-0.735	bias	3.9e-05	ADAM8,Ccl2,CD44,CDC37,FAS,GADD45A,ICAM1,IKBKB,IL1R2,LTB,MMP9,NFKB1,NFKB2,PON2,REL,RELB,VCAM1,XBP1	653 (16)
IGF1		growth factor		0.159	bias	3.99e-05	ADORA2B,AKR1B1,BAX,BIRC5,BSG,BTG2,CAMP,Ccl2,CCNA2,CCNB1,CCND3,CD44,CDK4,CDKN1A,CEBPD,CNP,CTSD,CYBB,CYFIP2,DUSP1,EGR1,EIF1AX,EIF4B,EIF4E,FN1,GADD45A,Gm21596/Hmgb1,H2AFX,HDC,HSD11B1,HSPA4,HSPA5,ICAM1,IER2,IFITM3,IL16,IL1B,JUN,JUNB,LAMP1,LASP1,LCN2,Ly6a (includes others),MAFG,MIF,MYC,NCAM1,NUPR1,PARP1,PCNA,PDXK,PKM,PLAUR,POLD4,PSMB8,PSMB9,SLPI,SQLE,SRM,SRSF3,TF,TGFBI,THBS1,TK1,TOMM40,TP53,TXNIP,UBE2…	974 (20)
Collagen(s)		complex		0.647		4.01e-05	C3,C3AR1,C5AR1,CD55,CD63,CD68,FN1,ITGAM,LAMP1,LAMP2,PPP1R15A,PSAT1,PXN,THBS1	411 (14)
UDP-D-glucose		chemical - endogenous mammalian	Inhibited	-2.236	bias	4.02e-05	CALR,HSP90B1,HSPA5,PDIA3,PDIA4
LDLR		transporter		0.442		4.15e-05	APOBEC1,Ccl2,CCR2,CD40,CD68,CYP27A1,EGR1,HSPA5,ICAM1,IL1B,LCN2,MMP9,MSR1,MYC,NR1H2,PLTP,PSMA7,PSMB7,PSMB9,PSMC6,PSME2,SCARB1,VCAM1	480 (17)
CYP1A1		enzyme		0		4.15e-05	ANXA3,ANXA4,ANXA7,AP2M1,BANF1,CBX3,CDKN2D,CNN2,COX6B1,ETHE1,Ifi27l2a/Ifi27l2b,LMNA,Mt1,NDUFA1,NDUFV1,PFDN1,RACGAP1,SDHB,SEPT2,SLC46A3,TACC3,TMPO,Ugt1a7c
TET2		enzyme		-1.091	bias	4.17e-05	ADAM8,ADORA2B,AHNAK,APOBEC1,C5AR1,Ccl2,DDB1,FAM129A,FAM129B,FBXL5,FCN1,FGL2,FN1,IFI16,IFITM3,IL1B,ITGB2,LXN,MMP8,Orm1 (includes others),RAB44,RND3,RNF144A,S100A8,SORL1,Spink2,TRIOBP	295 (7)
reactive oxygen species		chemical toxicant	Activated	2.093	bias	4.17e-05	ADAM9,APEX1,BAX,CASP1,CAT,CDKN1A,CSF1R,CXCR4,FAS,GADD45A,GLRX,HPSE,HSPA5,ICAM1,IL1B,JUN,MYC,NFKB1,PHB,PRDX3,PRDX5,PROK2,SUMO2,TP53,UCP2,VCAM1,XBP1	697 (19)
IRF7		transcription regulator	Activated	2.403	bias	4.43e-05	ATP5F1A,BC147527,Ccl2,CCRL2,CD40,FCGR1A,IFI16,IFI35,Ifi47,IFITM2,IFITM3,IRF5,IRF8,ITGAM,Ly6a (includes others),Ms4a4b (includes others),Mx1,OAS1,OAS3,PHF11,PLAC8,PLSCR1,PSMB10,PSMB8,PSMB9,PSME1,PSME2,S100A8,Slfn1,TMBIM6,TMPO,TNFSF13B,TREX1	399 (16)
GAST		other		1.299	bias	4.43e-05	ANXA7,ARCN1,EGR1,HCFC1,HDC,IMPDH2,JUN,MCM3,MMP9,NACA,NARS,PGK1,PHB,PLA2G7,PRDX3,RPL35A,RPL7,RPS19,S100A6,VCAM1	608 (19)
bendamustine		chemical drug		0		4.45e-05	AURKA,BAX,CCNB1,CDKN1A,PLK1,TP53	502 (7)
PDGF (family)		group	Activated	2.449	bias	4.45e-05	CALR,EEF1B2,HSPD1,P4HB,PDIA3,VIM
PLAUR	-1.107	transmembrane receptor		0.365	bias	4.5e-05	C5AR1,Ccl2,CDK4,CTSB,CYBB,ITGAM,ITGB1,JUN,JUNB,MMP9,MYC,PLAUR,VIM	684 (18)
hexachlorobenzene		chemical toxicant		1.546	bias	4.77e-05	ANXA1,CD14,CD44,EMP3,LCN2,LGALS3,LXN,MMP9,Ms4a6b,MYC,PSMB10,PSMB8,RFTN1,S100A10,Tpm1,VIM	599 (16)
trichostatin A		chemical drug	Activated	2.734	bias	4.85e-05	ANXA6,ARL6IP1,AURKB,B2M,BAX,BRMS1,BTG1,CAMP,Ccl2,CCNA2,CCNB2,CD14,CD44,CD9,CDC123,CDKN1A,CDKN2D,CENPM,CKS1B,CLDN1,CSF3R,CXCR4,CYBB,DDT,DPM2,DUSP1,FAS,GADD45A,GSN,HDAC1,HDAC3,HLA-DQB1,HPSE,HSPA5,ICAM1,IL10RA,IL1B,IPCEF1,IRF8,ITGA1,ITGAM,KIF20A,LGMN,LMNA,MAT2A,MBNL1,MCM3,MCM6,MGST3,MMP9,MXD1,MYC,NFKB2,NRP1,NXF1,OAT,OSM,PCNA,PHB,PLK1,PMM2,POLB,PRKCD,PSMB2,RAB6A,RARA,RASSF1,REL,RELB,RND3,RPL13,S100A1…	819 (18)
palmitic acid		chemical - endogenous mammalian		0.05		5.22e-05	ACAA1,ACADL,ACSL1,ATF3,ATP5MF,BAX,Ccl2,CD68,CDKN1A,CS,CTSB,CYBB,CYP4F2,DGAT2,EEF1A1,FDPS,HSPA5,ICAM1,IDH2,IL1B,IL1RN,IL6R,INHBA,KLF4,LCN2,MAFB,MAP1LC3B,Mt1,MVD,NCF1,NDUFA5,Orm1 (includes others),SCARB1,SLC25A4,TP53,TXNIP,UCP2,VCAM1,XBP1	736 (22)
CREB1		transcription regulator		1.786		5.25e-05	ATF3,ATP1A1,ATP6V0B,AURKA,BCAP29,BIRC5,BTG2,CCNA2,CCNB1,CCNB2,CCND3,CD3D,CD68,CD9,CDC37,CDCA8,CDKN1A,CEBPD,COX8A,CXCR4,CYFIP2,DUSP1,EBI3,EBP,ECM1,EGR1,EHD4,ESD,FGL2,FN1,GAA,GADD45A,GDA,HLA-A,HLA-DQB1,HLA-G,HSD11B1,HSPA4,HSPA5,IER2,Ifi202b,IL1B,INHBA,JUN,JUNB,KLF4,KLF7,LCN2,LITAF,MARCKSL1,MAT2A,MCM5,MCM6,MCTP1,MRPS18B,MVD,MYC,NDUFA10,NDUFA4,NDUFV1,NPC2,NRP1,OSTF1,PCNA,PDXK,PPP1R15A,PRCP,RHEB,RNH1,…	701 (18)
IL33		cytokine		0.71	bias	5.27e-05	ACAT1,ADORA2B,Ccl2,CCR2,CD40,Cd52,CD82,CLEC4E,CXCR2,DGAT2,EBI3,FAS,FGD2,G0S2,GOSR2,HDC,ICAM1,IL1B,IRF5,ITGAM,JUNB,KLC1,MSR1,NFKB1,NFKB2,NFKBIB,NLRP3,PAPSS2,PEA15,PILRA,RASSF4,REL,RELB,S100A8,SCARB1,SLC11A1,ST3GAL5,STX11,TFEC,TNFRSF13B,TNFRSF1B,TUBB6	513 (13)
SRC		kinase		1.54	bias	5.37e-05	ACAT1,CDKN1A,CTSB,CTSV,DOK1,DUSP1,ENO1,FGR,FN1,ICAM1,JUN,LAMP1,LAMP2,MMP9,MYC,NFKB1,PGK1,PLAUR,PLK1,PRKCD,RETSAT,SIRPA,SUMO1,VCAM1,VIM	829 (19)
NR3C2		ligand-dependent nuclear receptor		-0.734		5.37e-05	BAX,BID,Ccl2,CYFIP2,EGR1,FKBP1A,FKBP1B,FKBP4,FN1,GPX1,GPX3,HLA-DQB1,HMOX2,HSPA9,ICAM1,IDH3B,IL1B,INHBA,JUNB,LYST,MSRB1,PDHB,PPIB,TP53,TSC22D3	916 (20)
sulforafan		chemical drug		0.708		5.55e-05	AKR1B1,Akr1c12/Akr1c13,BAX,BIRC5,CCNB1,CD44,CDKN1A,FAS,FTL,GBE1,GPX1,GSTM5,GSTP1,HDAC1,HP,ICAM1,IL1B,KEAP1,MMP9,Mt1,PSMB5,SOD1,TALDO1,TKT,TP53,VCAM1,VIM	550 (16)
MAT1A		enzyme		1.092		5.75e-05	ACADL,BAX,EGR1,FAS,LTA4H,Mt1,PCNA,PHB,SOD1	517 (7)
EGR1	-1.535	transcription regulator		1.664	bias	5.82e-05	ATF3,BAX,CASP6,CASP8,Ccl2,Ccl6,Ccl9,CCR1,CCR2,CD44,CDC20,CDKN1A,CDKN2D,EGR1,FAS,FN1,FTL,GADD45A,HPSE,ICAM1,IL1B,IL6R,ITGAM,JUN,JUNB,MAP1LC3B,MMP9,MXD1,MYC,NFKB1,SOD1,SQLE,THBS1,TP53,VCAM1	933 (19)
PRKCB		kinase	Activated	2.353	bias	6.01e-05	Acp5,ATP6V1C1,BAX,CD40,CDKN1A,CYCS,EGR1,FN1,ICAM1,JUN,MMP9,Mx1,MYC,PRKCD,RELB,TCIRG1	403 (14)
lomustine		chemical drug	Activated	2.183	bias	6.05e-05	ANXA1,CD14,CD44,EMP3,LCN2,LGALS3,LXN,MCM3,MYC,PSMB8,RBM3,RFTN1,S100A10,TMEM173,Tpm1,TUBB,VIM
fluticasone propionate		chemical drug		-0.732		6.35e-05	ADAM9,ALOX5,ARHGAP25,C3,CAMP,CD74,CFB,CHIT1,EBI3,EMP1,FCN1,GAPT,HLA-DMA,HLA-DMB,HLA-DQA1,HSD11B1,IL18BP,IL1B,IL1R2,IL1RN,IRF8,ITGB7,MMP9,PAPSS2,PLAC8,S100A8,SESN1,SLC29A1,SLPI,THBS1,TNFSF13B,TSC22D3,WARS	713 (16)
doxifluridine		chemical drug		0.027	bias	6.66e-05	BAX,CDKN1A,FAS,GADD45A,RPL10A,RPL3,RPS27L,SESN1
SGPP2		phosphatase				6.76e-05	DNAJC3,HSP90AA1,HSPA14,Hspa1b,HSPA4,HSPA5,HSPA8,HSPA9,IL1B,XBP1
SRSF1		other		0.064		6.98e-05	AURKA,AURKB,BIRC5,FN1,LMNA,PLK1,PTBP1,SRSF7,Tmsb4x (includes others),TP53,VIM
BAX	0.973	transporter	Activated	2.704	bias	7.35e-05	BAX,CCNB1,CDKN1A,CTSB,CTSD,CTSH,CTSS,HLA-A,IFITM2,IFNAR2,MMP9,Mx1,PDIA6,TYK2,XBP1	635 (20)
prostaglandin E2		chemical - endogenous mammalian	Inhibited	-2.371		7.69e-05	ADORA2B,ATF3,BAX,BIRC5,BTG1,C5AR1,CAMP,CASP1,CASP6,Ccl2,CCNB1,CCR1,CD14,CD40,CD44,CD55,CDKN1A,CEBPD,Clec2d (includes others),CXCR4,CYTIP,DGAT1,DUSP1,EGR1,FAS,FN1,HDC,ICAM1,IL16,IL1B,IL1R2,IL1RN,ITGAM,ITGB1,JUN,KLF4,LMNA,MAFB,MMP9,MYC,NRP1,NT5E,OSM,S100A8,THBS1,TP53,TRAP1,TREM1,TSC22D3,UCP2,VIM	482 (16)
tozasertib		chemical drug		1.253	bias	7.75e-05	AURKA,BAX,CDKN1A,TP53	841 (22)
CHFR		enzyme				7.75e-05	AURKA,KIF22,PARP1,PLK1
RNASEH1	0.283	enzyme	Activated	2	bias	7.75e-05	GPAA1,PSMB4,RPS21,RPS3
BO-653		chemical drug		-1.982	bias	7.75e-05	PSMA1,PSMA2,PSMA3,PSMA4
caffeic acid phenethyl ester		chemical drug		-0.896	bias	7.95e-05	BAX,BIRC5,CD44,CDKN1A,CTSB,EGR1,ERCC1,FCGRT,FTL,ICAM1,IL1B,NFKB1,NFKB2,NFKBIB,PCNA,RARA,RELB,S100A6,ST13,TCP1,TP53,VCAM1,VIM	609 (14)
EP400		other	Activated	2.413	bias	7.99e-05	AGPAT2,CCNA2,CDC20,CDCA3,CDKN1A,H2AFZ,INCENP,MCM3,PCNA,PLK1,RASSF1,TP53,UHRF1
SMARCA4		transcription regulator		1.24	bias	8.49e-05	ACSL5,ADAM15,AHNAK,ALDH2,ARHGDIB,ASCC1,BATF,BIN1,BIRC5,C1orf54,CASP1,CCNA2,CCR1,CCR2,CCRL2,CD44,CD63,CD74,CDKN1A,CDKN2D,CFP,CNP,CTSB,CTSH,CTSS,CXCR4,DHRS9,EDNRA,EGR1,EMP3,FAS,FFAR2,FN1,GADD45A,GMFG,GPR183,GPX1,GSTO1,GSTP1,GYS1,HCST,HFE,HLA-E,ICAM1,IFI16,IFI30,IFITM2,IFITM3,IL1B,INHBA,ITGB1,JUN,KDM6B,LGALS1,LGALS3,LMNA,LPXN,MAPK13,Mt1,MXD1,MYC,NFKB2,NPC2,NRP1,PLAUR,PLEKHO1,POLB,Ppfia4,PSMB9,PTP4A2…	832 (25)
acetaminophen		chemical drug		0.958		8.57e-05	ACTG1,APEX1,BCKDHA,BTG2,CASP8,CAT,Ccl2,CCR1,CCR2,CDKN1A,CTSV,FAS,GADD45A,GLUD1,GPX1,GSTP1,HSD17B4,HSPA5,HSPD1,ICAM1,IFRD1,IL1B,ITGB1,JUN,Mt1,MYC,PCNA,PLAUR,PRDX1,TF,TUBA1A,TUBB,TXN,VCAM1	716 (17)
E2F2		transcription regulator		0.123	bias	8.82e-05	BIRC5,CASP6,CCNA2,CCNB1,CCNB2,CCND3,CDCA4,CDKN1A,CDKN2D,ECE1,MCM2,MCM3,MCM5,MCM6,MCM7,MYC,PCNA,TP53	695 (16)
GPS2	0.306	transcription regulator		-1.835	bias	8.86e-05	BIN1,Ccl2,CDKN1A,DHRS3,HEBP1,HP,IDH1,MBNL1,MCTP1,MYC,PID1,SHISA5,SNX1,VCAM1	370 (11)
bee venom		chemical - endogenous non-mammalian		-0.231		8.91e-05	Arf2,Ccl2,CCNB1,CYBB,CYTIP,GADD45A,ICAM1,IFRD1,IL1B,IPO5,JUN,JUNB,KIF23,KLF4,MYH9,NLRP3,NUPR1,OSM,PPP1R15A,Slfn2,Tnfsf9,TOP2A	594 (11)
miR-124-3p (and other miRNAs w/seed AAGGCAC)		mature microRNA	Inhibited	-3.23	bias	9e-05	ACAA2,ALDH9A1,ASPRV1,Ccl2,CDK4,CPNE3,EGR1,ERH,FAM129B,G3BP1,GNG10,GSN,HADH,HADHB,IQGAP1,ITGB1,LITAF,MAD2L2,MAGT1,MMADHC,MYH9,NECAP2,PAPSS2,PDLIM7,PLOD3,PLP2,PTBP1,RHOG,SEC11A,SLC15A4,SLC50A1,STOM,SURF4,SWAP70,SYNGR2,TMBIM1,TMEM109,TUBB6,UHRF1,ZBED3
HOXA9		transcription regulator		-0.788	bias	9e-05	CDC37,CSNK1A1,CYBB,EDNRA,FCGRT,FPR2,FXR1,GLRX,GLRX3,GMNN,GNG10,GPR183,IER2,JUN,JUNB,LAT2,LY86,MAFB,MAFG,MBNL1,MYC,NDUFB3,RCBTB2,RPL27A,RPL37A,S100A8,SRP72,ST13,Tmsb4x (includes others),TSC22D3,VIM,WSB1,YWHAG
FAS	-0.75	transmembrane receptor		1.256		9.02e-05	API5,ARHGDIA,ARRB2,BAX,BID,BIRC5,CASP8,Ccl2,CCR1,CCRL2,CD44,CD48,CDKN1A,CEBPD,CXCR2,EGR1,ERCC1,F5,FAS,FGL2,FPR1,HLA-DQB1,ICAM1,IL10RA,IL13RA1,IL16,IL1B,JUN,LGALS3,LTB,LY75,MBOAT7,MIF,MMP9,OPTN,OSM,P2RX4,PDLIM7,PGLYRP1,PPP1R15A,PPP1R3D,PSTPIP1,PTP4A2,RARA,RHEB,SLPI,SORL1,STK17B,TAGLN2,TNFRSF1A,TNFRSF1B,TRIB1,TSPAN3,TWF2,TYK2,VCAM1,VRK2,XPC	489 (17)
cytarabine		chemical drug		1.771	bias	9.2e-05	BAX,CCNB1,CD180,CD40,CD55,CDKN1A,FAS,GADD45A,HLA-A,ICAM1,IL1B,LTB,PPP1CA,RAE1,SESN1,TOP2A,TP53	618 (18)
SAFB		other		-0.775	bias	9.31e-05	B2M,BCCIP,CD74,EIF4B,HEXA,HLA-E,JUN,LTB,NUPR1,PAPSS2,PSMB9,RPL35A,S100A8,UBE2B,UQCRC2
TYROBP		transmembrane receptor		1.491	bias	9.39e-05	CD40,GPX1,ICAM1,IL10RA,IL13RA1,IL1B,IRF8,ITGAM,ITGB1,NPC2,SIRPB1,SLC1A5,TCIRG1,TMEM106A,TNFRSF1B,TREM2	517 (15)
ursolic acid		chemical drug		0.414	bias	9.39e-05	AKR1B1,ATF3,BAX,CDKN1A,CXCR4,EIF2S2,EIF3C,IL1B,MMP9,MTDH,MYC,NARS,PDCD4,SARS,TP53,VCAM1	627 (16)
cigarette smoke		chemical toxicant		1.572	bias	9.59e-05	BIRC5,C3,CAT,Ccl2,CCT5,CDKN1A,CKB,CLEC5A,EGR1,ESD,FABP5,FTL,Gm21596/Hmgb1,GPX3,GSTM5,GSTP1,HSP90AA1,HSPA5,HSPA9,ICAM1,IKBKB,IL1B,JUN,KLF4,MAP1LC3B,MAP3K1,MMP9,NFKB1,OAS1,OAS3,P2RX4,P2RX7,P2RY6,PGD,PRDX1,PSMD1,REL,TCP1,Tmsb4x (includes others),TNFRSF1A,TP53,TREM2,XBP1	598 (15)
SNCA		enzyme		-0.25		9.92e-05	AIF1,BAX,Bst2,Ccl2,CD68,CD74,CFL1,CTSB,CYBB,DHRS3,GDA,GLO1,GSN,HLA-DQA1,HLA-DRB5,HSP90B1,Hspa1b,HSPA5,Ifi47,IL13RA1,IL1B,ITPA,LAMP2,MMP8,MMP9,NCF1,PDE2A,PLAC8,PLSCR1,PRKCD,PSMA3,PSMB9,SERPINB1,TP53,TPI1,TUBG1,UQCRHL,YWHAE,YWHAG,YWHAH	944 (25)
estrogen		chemical drug	Activated	3.538	bias	9.93e-05	ALDH1B1,ATP5PF,AURKA,CCNB2,CDKN1A,CKB,CKS1B,COMT,CTSD,CYBB,DUSP1,EGR1,FAS,FEN1,FN1,ICAM1,IL1B,ITGB1,JUN,JUNB,LCN2,LGALS1,LTF,MCM3,MCM5,MCM7,MTA3,MVD,MYC,NME1,OAT,PCNA,PHF5A,PISD,PSMA2,PTTG1,RAF1,RARA,RFC3,SCARB1,SOD1,SRM,Tmsb4x (includes others),TOP2A,TP53,UHRF1,XBP1	846 (22)
PPP3CA		phosphatase				9.98e-05	C3,CD82,CD9,CDK4,CDKN1A,CTSV,FN1,FTL,GRN,GSTP1,LAMP2,LITAF,MAGT1,MGST1,PRDX5,PSAP,S100A4,TF,VIM	732 (17)
CCND1		transcription regulator		1.207		0.000105	AHNAK,AURKA,BIRC5,Bmyc,C11orf58,CALU,CCNA2,CCND3,CD44,CDCA8,CDK4,CDKN1A,CPNE3,EEF1B2,ENO1,FAM129B,G3BP1,GALNT11,HSPA1A/HSPA1B,HSPA8,KDM6B,KIF20A,LASP1,MCM7,MYC,NCAPH,NOP58,NT5E,PCNA,PDCD4,PDLIM4,PLK1,RACGAP1,RFC5,RPL10,RPL13,RPL27A,RPS6,SEC61B,SELENBP1,SERINC3,STOM,TALDO1,TMEM219,TOR3A,TP53,TP53INP2,TPI1,TUBA1B,TUBB,TUFM,UHRF1,USE1	679 (17)
ouabain		chemical drug		0.646	bias	0.000105	ANXA5,ATP1A1,CDKN1A,HSPA5,HSPA8,HSPA9,PCNA,PHB,TP53,VIM,YWHAG,YWHAH,YWHAQ	537 (19)
SIRT1		transcription regulator		-1.714		0.000107	ACAP1,ANXA4,BAX,BIRC5,CAT,Ccl2,CCNB2,CCND3,CD74,CDKN1A,CMIP,COX4I1,CYCS,DDB1,DDX60,EBI3,EIF2S2,FN1,GADD45A,H2AFZ,HLA-A,HLA-DQA1,HLA-DQB1,HLA-DRB5,ICAM1,IDH2,Ifi47,IFITM3,IL1B,LAPTM5,LGALS3,LGALS3BP,LY6E,MGAT2,MMP9,Ms4a6b,MYC,NDUFA5,NKG7,OAS1,PARP1,PHB,PRMT3,PSMB9,RELB,RPL10A,RPL13,SEC61A1,Slfn2,SNRNP70,TACSTD2,TBC1D10C,TP53,UCP2,UQCRC2,UQCRFS1,XPC	876 (21)
L-dopa		chemical - endogenous mammalian		-1.428		0.000107	ABCB8,AIF1,ARG2,ARRB2,BANF1,BAX,C12orf43,C1GALT1C1,CAP1,CAPG,CCS,CD63,Clec2d (includes others),CLN6,COMT,Cox5b,CTSB,CTSC,CTSZ,CYTH4,DCTN3,DDOST,DENND1C,DGAT2,DPP7,DUSP1,ECE1,EIF6,ERLIN1,FCGRT,FDPS,FTL,GAS7,GNS,GOLIM4,GPS1,H2AFX,HCST,HEXA,HLA-A,HVCN1,IFNAR2,IL18BP,IQGAP1,JUNB,KARS,LAMP2,LAPTM5,LASP1,LAT2,LMNA,MAP3K1,MAT2A,MIEN1,MRPL48,MSRB1,MVB12A,MXD1,NDUFA5,NPC2,NPM3,NT5E,P2RY6,PA2G4,PCYT2,PDCD4…	405 (7)
MDM4		enzyme		-1.843	bias	0.00011	BAX,CDKN1A,LGALS3,P4HB,RAC2,SSBP1,TP53,VIM	718 (21)
SP110		transcription regulator		-1.177		0.000111	ANXA5,ATF3,CD74,CDC37,CTSB,ERCC1,GRN,IFITM3,IFNAR1,IL6R,ITGB1,LMNA,LY96,MYC,MYH9,OAS1,OAS3,P2RX7,PDCD6IP,PLK1,PLSCR1,RPA1,SUMO3,TAF6,TNFRSF1A,TXNIP
ATP-gamma-S		chemical reagent				0.000113	BTG1,C3,CCR1,CD40,CD55,CSF1R,CXCR4,IL16,IL1R2,MMP9,MPEG1,NRP1,PRDX2,SLC29A1,THBS1,TRAP1,WARS	583 (17)
mitomycin C		chemical drug		0.796	bias	0.000116	ATF3,BAX,BIRC5,BTG2,CCNB2,CDKN1A,EGR1,FAS,GADD45A,JUN,MALAT1,PARP2,PPP1R15A,PYCARD,SRSF7,TP53	739 (22)
PTGES		enzyme		-0.82		0.000117	ANXA1,BIRC5,Ccl2,CDKN1A,CYBB,EGR1,IL1B,ITGAL,MMP9,MYC,NCF1,PPA1,RPS19,VIM,VPS72	563 (21)
N-acetyl-L-cysteine		chemical drug		0.185	bias	0.000118	ADIPOR1,ADORA2B,ATP1A1,BAX,BSG,C3,CASP1,Ccl2,CCR2,CDKN1A,CXCR4,CYBB,DUSP1,EGR1,FAS,GSTP1,HAX1,HDC,HSPA5,ICAM1,IL1B,ITGAM,JUN,LTB4R,LY96,MAP1LC3B,MMP9,MSR1,MYC,NLRP3,OSGIN1,PARP1,PCNA,PLAUR,PRDX2,RAF1,TP53,TXN,VCAM1	717 (18)
VCP	0.569	enzyme		-0.277	bias	0.000121	Ccl2,DUSP1,HSPA5,NEDD8,NFKB2,TNFSF13B,VCAM1	459 (13)
GTF2I		transcription regulator				0.000121	CAT,CD3D,CDKN1A,HSPA5,MYC,PDIA4,THBS1	248 (7)
aphidicolin		chemical toxicant		1.294		0.000121	BAX,CCNB1,CDKN1A,GADD45A,Hist1h1b,TK1,TP53	774 (21)
manganese		chemical - endogenous mammalian		0.447		0.000121	C5AR1,CDKN1A,GOLIM4,HSP90B1,HSPA5,PARK7,SLC40A1	289 (7)
phytohemagglutinin		chemical drug	Activated	2.142	bias	0.000127	ADH5,AIF1,ALDH2,BTG1,CALU,CAT,CCND3,CCR2,CD3D,CD44,CDK4,COX7B,CXCR4,EIF5A,FAS,FGR,GYS1,HCFC1,HINT1,HSP90AA1,ICAM1,IDH3A,IL1B,IL1R2,KIF23,LAMP1,LMAN1,MMP9,NCAM1,NEDD8,NFKB1,NME1,NOP56,NT5E,PCNA,PCYOX1,PDHB,PLK1,PON2,PRKX,PRPS1,PSMA1,RPA1,RPS16,SARS,SCARB2,TMPO,VPS41,XBP1	479 (18)
RET		kinase		0.255	bias	0.000128	ANXA1,ANXA4,Ccl2,CTSB,CTSV,CXCR4,DNAJC3,DPYSL2,EGR1,FKBP4,HSP90AA1,HSPA1A/HSPA1B,HSPA8,HSPA9,HSPD1,IL1B,MMP9,PLAUR,S100A9,ST13,STIP1,STUB1,TACC3,TP53	733 (22)
methamphetamine		chemical drug		-0.097		0.000129	BAX,BID,Ccl2,EGR1,FAS,ICAM1,IL1B,JUN,LGALS1,MMP9,MYC,NDUFB8,SIGMAR1,TNFRSF1A,TNFRSF1B,TXN,UQCRC2,VCAM1	490 (15)
CCL2		cytokine		-0.406	bias	0.00013	BIRC5,Ccl2,CCR2,CD40,CEBPD,HDC,ICAM1,IL1B,INHBA,ITGA1,ITGAL,LAMP1,LCN2,MMP9,NCF1,PCNA,SCARB1,SLC11A1,SLC40A1,VCAM1	523 (16)
miR-542-3p (miRNAs w/seed GUGACAG)		mature microRNA	Inhibited	-2.201	bias	0.00013	RPL11,RPL22,RPS23,RPS28,TP53
FALEC		other		1	bias	0.00013	BTG2,CDKN1A,CYFIP2,ECM1,FAS
RAB1B		other		1.811	bias	0.000134	ARF4,ARL1,COPG1,DERL1,GORASP2,JUN,KDELR1,NAPA,RABAC1,SEC31A,YIF1A
Igm		complex		0.972		0.000137	BIRC5,CCNA2,CD40,CD44,CDKN1A,CYCS,EGR1,FAS,MYC,NFKB1,NFKB2,PDCD4,TNFRSF13B,TNFRSF14,TP53,XBP1,ZFP36L1	429 (16)
miR-125b-5p (and other miRNAs w/seed CCCUGAG)		mature microRNA		-1.437	bias	0.000137	ABTB1,ALOX5,ANAPC16,CASP6,CCNA2,CD44,DUS1L,H3F3A/H3F3B,HIST1H4A,IL1RN,IL6R,JUN,KLF13,LIN28A,LIPA,MAP2K1,OSBPL9,PROM1,TOR2A,TP53,UBE2I	745 (16)
RASSF5	-0.342	other		0.094		0.00014	BZW1,CDKN1A,EEF2,GTF3A,LRRFIP1,LSM7,PSMD1,RAP1A,RPS15,UQCR11
MKNK1		kinase	Activated	3.008	bias	0.000143	ACOT7,ANXA5,EEF1D,FAM49A,GPS1,HADHA,HSD17B4,IFRD1,KLC1,KLF13,LCN2,MYC,PLTP,PLXNB2,PREP,PTBP1,RNH1,SFR1,TMBIM6,TXNIP,VIM,YWHAG	114 (4)
RBL2		other	Inhibited	-3.139	bias	0.000143	AURKA,AURKB,CASP6,CCNA2,CCNB1,CCNB2,CDKN1A,FAS,HADH,HCFC1,KLF10,KPNA2,MYC,PA2G4,PCNA,PLK1,PPM1G,PSMB2,RAF1,RANBP1,STMN1,XPC	593 (16)
KDM5B		transcription regulator	Inhibited	-3.272	bias	0.000143	ARL6IP5,AURKA,BUB3,CCNB1,CDCA3,CLDN1,EGR1,FABP5,GADD45A,GCA,INSIG1,IVNS1ABP,LGALS3BP,MCM2,MCM3,NCAPH,NDE1,POLB,PRPS1,SNRPD1,SPTSSA,SS18,SWAP70,TNFSF13,TOP2A,TUBB2A,XBP1	433 (10)
AMPK		complex		0.755		0.000147	ACO2,BAX,BIRC5,CAT,Ccl2,CCNB1,CDKN1A,CLDN1,CS,CYBB,CYP4F2,EGR1,IDH3A,IL1RN,LITAF,MMP9,NCF1,OAT,PDHB,SDHA,SOD1,TP53,UCP2,VCAM1,VIM	712 (22)
GH1		growth factor		0.138		0.000147	ATF3,CCNB1,CCND3,CEBPD,CXCR4,DBI,EGR1,FN1,GADD45A,HDAC1,ITGA1,JUN,JUNB,MGST1,PRDX1,RAD23A,RPL6,SHMT2,SOD1,TAF9,TKT,TNFRSF1A,UQCRHL,VIM	620 (20)
NS-398		chemical reagent		-0.606	bias	0.000153	BAX,BIRC5,BTG2,CAPN2,CCNB1,CDKN1A,CXCR4,ICAM1,IL1B,MMP9,PCNA,PDCD4,PRDX1,PSMB5,PSMB8,PSMB9,S100A8,S100A9,TP53,TREM1	422 (18)
PRNP		other		-0.103		0.000155	ADAM8,BAX,CD44,CTSD,EGR1,EIF2S1,H2AFX,HSP90B1,HSPA1A/HSPA1B,HSPA5,HSPA8,HSPA9,IL1B,LAMP2,MYC,PDIA3,PLAUR,TP53	468 (16)
PTTG1	0.607	transcription regulator		0.342		0.000155	APEX1,CCNA2,CCNB1,CD44,CDKN1A,CDKN2D,ERCC1,FEN1,MIF,MPG,MYC,PARP2,SUMO1,TP53,TREX1,UBE2B,VIM,XRN2	807 (23)
1-methyl-4-phenyl-1,2,3,6-tetrahydropyridine		chemical toxicant		0.642	bias	0.000155	AIF1,BAX,CASP1,CASP8,Ccl2,CLDN1,CYBB,EGR1,IDH2,IL1B,ITGAM,JUN,OSM,PARK7,SLC40A1,TNFRSF1A,TNFRSF1B,TP53	499 (16)
cadmium		chemical toxicant	Activated	2.22	bias	0.000155	ACAA1,ATP1A1,B2M,BAX,BID,C3,CDKN1A,GNS,HLA-DQB1,HNRNPK,HSPA5,JUN,LGALS3,Mt1,MYC,PSMD6,RETSAT,TP53	896 (18)
HOXA10		transcription regulator		-1.301		0.000157	AIMP2,ARL2,ATF6B,CDKN1A,CSF3R,CTSV,CYBB,DHRS9,EIF3A,FKBP3,FN1,HLA-DQA1,HLA-DQB1,HMBS,HSP90AA1,IDH2,KLF10,LCN2,LTF,MAX,NCAM1,P4HB,PHGDH,PRKCD,PROM1,PROS1,RHOG,RNASE4,RPL37A,STK17B,TNFSF13B,TP53,YWHAG
TICAM1		other		0.855	bias	0.000157	ACSL1,Ccl2,CCRL2,CD40,CEBPD,CFB,DUSP1,EGR1,FAS,FPR1,FPR2,ICAM1,IFI16,Ifi47,IL18BP,IL1B,MCM2,Ms4a4b (includes others),Mx1,NFKB1,NFKB2,PILRA,RELB,SAMHD1,TFEC,Tnfsf9,TREM1,VCAM1	386 (13)
discodermolide		chemical drug				0.000159	CCNB1,CCNB2,CDC20,CDKN1A,GADD45A,KIF23,PLK1,PTTG1,RFC3,RFC5,TOP2A,TP53	555 (12)
TLR4		transmembrane receptor	Activated	2.144	bias	0.000162	ATF3,BATF,BAX,C3,CASP8,Ccl2,CD14,CD40,CD44,CEBPD,CERS5,CFB,COX4I1,CXCR2,EBI3,FAS,FGL2,HDAC1,HDC,HHEX,HLA-DQA1,HPSE,HSPA5,ICAM1,IDH2,IFI16,Ifi47,IFITM3,IL18BP,IL1B,INHBA,IRF8,ITGAM,LCN2,LMO4,LYST,MIF,MMP9,Mx1,MYC,NFKB1,NFKB2,NLRP12,REL,RELB,RGCC,SCARB1,SGMS2,SLFN12L,SMPDL3A,TNFRSF13B,TREM1,TREM2,TREM3,TSPO,VCAM1,Wfdc17,XBP1	593 (15)
curcumin		chemical drug		0.153		0.000173	AKR1A1,ALOX5,ATOX1,BAX,BIRC5,CAMP,Ccl2,CCNB1,CCND3,CD44,CD81,CDK4,CDKN1A,CLIC1,COPS5,COX7B,CSNK1A1,CTNNA1,CXCR4,EGR1,EIF3H,EIF4E,FAS,FTL,GSTP1,HDAC1,HSP90B1,HSPA1A/HSPA1B,HSPA8,ICAM1,IKBKB,IL1B,ITGAM,JUN,JUNB,MARCKSL1,MIF,MMP9,MYC,NCAM1,NFKB1,OGDH,POLR2C,SCARB1,SERPINB1,SOD1,ST13,TNFRSF1A,TOP2A,TP53,TPT1,TSC22D3,UCP2,VCAM1,VIM	770 (17)
RBM5		other		-0.629		0.000175	ADAM9,ANXA1,ATP5MC3,BTG2,GBE1,HSP90AA1,ICAM1,IFITM3,INSIG1,ITPA,NDUFV2,UBA1,UCP2
COPS5	0.331	transcription regulator		-0.164		0.000175	AIMP1,BAX,CDKN1A,GPS1,H2AFX,IFNAR1,RARS,TP53	662 (25)
SPP1	1.148	cytokine		1.88	bias	0.000175	Acp5,AURKA,BAX,CASP8,Ccl2,CCS,CD44,CD9,CDC20,CDKN1A,COX7A2L,FN1,HMOX2,ICAM1,IL1B,INSIG1,MMP9,MTA2,MYC,NDUFA9,NDUFB9,NDUFS7,NDUFS8,NDUFV1,PGD,RAF1,S100A4,S100A6,SAMM50,SSB,TP53,UQCRC2,VIM	637 (17)
ZNF106		other		-1.941		0.000175	C3,COX7A2L,ENPP5,GLRX,Ifi27l2a/Ifi27l2b,IFITM3,LGALS1,LGALS3,NDUFB10,PRDX2,S100A8,SLC11A1,TSPO
ACTB		other		1.913		0.000175	ACTG1,AURKA,AURKB,CCNB2,DSTN,RACGAP1,SLC11A1,STMN1
RBL1		transcription regulator	Inhibited	-2.735	bias	0.000185	AURKB,CASP6,CCNA2,CDKN1A,DDB1,FAS,MCM2,MCM3,MCM5,MCM6,MCM7,MYC,PA2G4,PCNA,PLK1,RRM1,THBS1,TP53	700 (16)
IFI16	1.495	transcription regulator		0.702	bias	0.000185	BAX,CD81,CDKN1A,CSF3R,GADD45A,GPX1,ICAM1,IFI16,IL1B,IL1RN,MAP2K1,MGST1,MIF,Mx1,OAS1,PCNA,SOD1,VCAM1	690 (19)
topotecan		chemical drug		0.272		0.000194	ACSL1,ARL6IP1,ATF3,AURKA,BTG1,C3,CCNB1,CCR2,CDKN1A,DCK,EGR1,ENO1,FAS,GPX1,HLA-DQA1,HLA-E,HNRNPK,HSPA1A/HSPA1B,HSPA8,HSPD1,JUNB,MAT2A,MGST2,MYC,PLK1,PNP,RCBTB2,SIVA1,SRSF3,TOP2A,TP53,TRAP1,UBE2B	720 (18)
E. coli B5 lipopolysaccharide		chemical - endogenous non-mammalian		-1.558	bias	0.000196	ADH5,ADORA2B,ALDH2,B2M,BCL6,CAT,Ccl2,Ccl6,Ccl9,CCR1,CD40,CD44,CDKN1A,CSF3R,CX3CR1,CXCR2,CXCR4,CYBB,DBI,DUSP1,EEF1A1,GPX1,HLA-A,HSD11B1,ICAM1,IL13RA1,IL16,IL18RAP,IL1B,IL1R2,IL6R,ITGAL,JUNB,MAT2A,NCF1,PPIA,PSMA5,SELENBP1,SOD1,SUMO2,THBS1,TREM1,UBE2I	503 (16)
hemozoin		chemical - endogenous non-mammalian		-1.273	bias	0.000196	Ccl2,CCR1,CCR2,CXCR2,CXCR4,ICAM1,IL1B,MMP9,S100A8,S100A9	465 (14)
Histone h3		group				0.000199	ARSG,B2M,BIRC5,Ccl2,CCNA2,CCNB1,CD40,CD9,CDK4,CDKN1A,CEACAM1,CKAP4,CSF1R,CTNNA1,EGR1,FAM49A,HPSE,ICAM1,Ifi27l2a/Ifi27l2b,IFITM3,IL1B,IL6R,JUN,MCM2,MCM3,MCM5,MGLL,MMP9,MRPS9,Mt1,MTUS1,NCF1,NDUFA12,NDUFA5,NDUFB4,NDUFB6,NDUFC1,NDUFC2,NDUFS2,NDUFS3,NDUFV1,OSGIN1,PCNA,POLD4,PROS1,PSMA2,PTCD2,RARA,RASSF1,RGS10,RPL10A,RPL12,RPS6,RPS9,RSL1D1,S100A8,S100A9,SCARB1,SEC31A,STOM,TOP2A,TRIB1,UQCRC1,UQCRC2,VKOR…	794 (20)
ciprofibrate		chemical drug		1.373		0.0002	ACAA1,ACADL,Akr1c12/Akr1c13,BSG,CAT,CD63,CEACAM1,CSTB,CTSV,CYP27A1,DBI,GSTP1,HADHA,HDAC1,HSD11B1,HSD17B4,LCN2,LGALS3BP,MGLL,NPC2,OAT,Orm1 (includes others),PLSCR1,RBM3,RPL12,SCARB1,SELENBP1,TAGLN2	603 (17)
teriflunomide		chemical drug		0.268		0.000207	BSG,CASP8,FAS,ICAM1,IL10RA,IL1B	500 (14)
PI3K (complex)		complex		-0.438	bias	0.00021	ADIPOR1,ATF3,BIRC5,Ccl2,CCNB1,CCND3,CCR1,CCT6A,CD44,CD55,CDK4,CDKN1A,CTSD,CXCR4,CYBB,DUSP1,FABP5,FN1,GSTM5,GSTP1,ICAM1,IL1B,IL1RN,ITGAM,ITGB1,ITGB2,JUN,LASP1,LCN2,MMP9,MYC,NFKB2,NME1,OSTF1,PDCD4,PRDX2,RND3,RPL23,SAMHD1,SOAT1,STMN1,THBS1,TP53,TREM1,TXNIP,VCAM1,XBP1	496 (16)
ARNT2		transcription regulator	Activated	3	bias	0.000215	AKR1B1,CCR1,CCS,Cd52,EGR1,EIF5A,FKBP3,GPX3,GTF3A,HLA-A,ICAM1,IFI16,IL6R,LCP1,LRRFIP1,LTF,MCM7,MRPL37,NACA,NDUFA1,NUDC,PDLIM4,PEA15,PFN1,PGK1,POLD4,RGS10,Rpl29 (includes others),SELENBP1,SLC2A3,SNX5,Tnfsf9,TSC22D3,TYK2,UBA1,ZFP36L1
cerivastatin		chemical drug		0.793		0.000221	ASS1,CD40,CDKN1A,CNP,DBI,FDPS,FN1,GPX1,ICAM1,ITGAL,ITGB2,JUN,MMP9,MYC,PLAUR,S100A8,S100A9,VCAM1	476 (15)
bleomycin		chemical drug		0.738	bias	0.000224	C3,Ccl2,Ccl9,CCR1,CCR2,CD68,CDKN1A,CTSD,CTSS,CXCR4,FAS,FN1,H2AFX,ICAM1,IL13RA1,IL1B,ITGA1,ITGB1,MIF,MMP8,MMP9,MYC,NFKB1,PCNA,PTTG1,S100A4,STK17B,STOM,THBS1,TINAGL1,TNFRSF1A,TP53,UBE2C,UHRF1	712 (20)
GPER1		G-protein coupled receptor		0.718	bias	0.000227	ASAH1,ATF3,BAX,CDKN1A,CEBPD,DUSP1,EGR1,HSPA5,IER2,JUN,LTF,MYC,NOP58,PPP1R15A	834 (20)
prednisolone		chemical drug	Inhibited	-3.158	bias	0.000228	API5,ATG3,BAX,BID,BTG1,CASP8,CAT,Ccl2,CEBPD,CTSB,CTSS,CXCR4,DAD1,DUSP1,EDNRA,FAS,GAA,GM2A,GPX3,HDAC1,HSP90AA1,HSPA8,IL1B,ITGAM,MAP1LC3B,MAP2K1,MRPS16,MYH9,NFKB1,PARK7,PGK1,POLB,PRDX1,PRDX2,SLC29A3,SOD1,TP53,TSC22D3,TXNIP	649 (15)
SP1		transcription regulator	Activated	2.761	bias	0.000228	ACSL1,ADH5,ALOX5,ASS1,ATF3,ATP5F1B,BAX,BIRC5,C1QBP,CAMP,CAT,Ccl2,CCNA2,CCND3,CD40,CD55,CDK4,CDKN1A,CDKN2D,CEACAM1,CEBPD,CKB,CTSD,CXCR4,CYC1,EGR1,F10,FAS,FN1,FPR2,GLTP,HADHA,HADHB,HDAC1,HDAC3,HDC,HINT1,HPSE,Hspa1b,HSPA5,ICAM1,IFITM3,IFNGR1,IL1B,ITGAM,JUN,KLF4,LIPA,LTB,LTB4R,MAT2A,MMP9,Mt1,MYC,NFKB1,P2RX7,PADI4,PARP1,PGK1,PKM,PLAUR,POLB,PRKCD,PROM1,PTTG1,RANBP1,RARA,SCARB1,SLC11A1,SLC25A4,SLC25A5,S…	983 (23)
ITK		kinase	Activated	2.583	bias	0.000237	ARAP3,BAX,CD44,CX3CR1,EHD4,FAS,HLA-A,IFNGR1,IL10RA,IL18RAP,ITGA1,Klrk1,LAT2,LPAR6,Ly6a (includes others),MYC,SULF2,TF,TP53	565 (16)
LGALS3	0.44	other		-0.321		0.000248	Ccl2,CCNB2,CCR1,CCR2,CDKN1A,CTSH,CTSV,DDOST,FN1,ICAM1,IL1B,ITGAM,ITGB1,LAMP1,MAP2K1,MGST1,MSR1,MYC,PRKCSH,VCAM1	519 (18)
bexarotene		chemical drug	Activated	2.378	bias	0.000248	ARL6IP5,CCDC107,Ccl2,CHCHD2,Cox5b,COX6A1,COX8A,CST3,CTSH,CYCS,DCTN3,DHRS3,DUSP1,FKBP2,GARS,GUK1,ICAM1,IER2,IL1B,KLF10,LSM4,MALAT1,MMP9,MRPL54,NDUFB2,NDUFB8,PLAUR,PTPRO,RABAC1,S100A9,TPGS1,TSC22D3,VCAM1,XBP1	892 (20)
lysophosphatidic acid		chemical - other		0.266	bias	0.000254	BCL6,Ccl2,CD14,DUSP1,EGR1,GRN,ICAM1,IL1B,ITGAM,JUN,JUNB,MMP9,MSR1,MYC,NFKB1,PLAUR,SCARB1,TF,TP53,VCAM1,VIM	873 (20)
PRKAA2		kinase		0.186	bias	0.000257	ACOT7,ARHGDIB,ATP5MC2,BAX,CD302,CDKN1A,COX4I1,CYBB,EGR1,FN1,HSPA5,LMO4,Ly6a (includes others),MGST1,MMP9,NCF1,OAT,P4HB,RAF1,SORL1,TP53,VIM,ZFP36L1	576 (20)
rottlerin		chemical toxicant		-0.761	bias	0.000263	BAX,BIRC5,Ccl2,CCND3,CDK4,CDKN1A,CLDN1,ECE1,ICAM1,ITGB1,JUN,MMP9,PCNA,PDCD4,PLSCR1,PRDX1,PRKCD,VCAM1	628 (17)
SOX4		transcription regulator		1.469	bias	0.000265	Akr1c12/Akr1c13,ALDH1B1,B3GNT8,BAX,BIRC5,CAPN2,CASP1,Ccl9,CD74,CTNNA1,EMB,EMP1,EVI2A,FFAR2,FN1,GPR183,HLA-DQB1,IFI30,Ly6a (includes others),MARCKSL1,MGST2,Mt1,NCAM1,PNP,PYGL,RNASE4,RNF144A,S100a11,TAX1BP3,TMEM176B,Tmsb4x (includes others),TUBA1A,VIM
ERVW-1		other		0.4	bias	0.000267	CCNA2,CDCA8,CDKN1A,CNP,HSPA5,MCM2,TP53,XBP1	489 (7)
SENP1		peptidase		1.709	bias	0.000267	ATP5MC1,Ccl9,Cox5b,CYCS,IDH3A,MMP9,SUMO1,UCP2	524 (20)
BID	0.299	other		0.707	bias	0.000267	C3AR1,C5AR1,Ccl2,CTSB,CTSD,CTSH,CTSS,IL1B	749 (16)
TP53COR1		other		0.788	bias	0.000267	BAX,BID,CASP1,CASP8,FAS,HIPK1,IL1B,TOP2A	633 (16)
farnesol		chemical reagent	Activated	2.057	bias	0.000267	ATF3,CCNB1,CDKN1A,HSP90B1,HSPA5,PDIA4,TP53,XBP1	664 (23)
5-O-mycolyl-beta-araf-(1->2)-5-O-mycolyl-alpha-araf-(1->1')-glycerol		chemical - endogenous non-mammalian		-0.88	bias	0.000278	ACSL1,ATF3,CD40,CD44,CX3CR1,CXCR2,DUSP1,EBI3,ICAM1,IL18RAP,IL1B,MGLL,MMP9,NFKB1,NFKB2,NT5E,PLA2G7,RND3,VCAM1	435 (11)
PPARGC1B		transcription regulator	Activated	2.476	bias	0.000288	ACADL,ATP5F1B,ATP5MF,ATP5PO,C3,CKB,COX4I1,COX5A,Cox5b,CS,CYCS,DGAT1,ENO1,FDPS,MVD,NDUFV2,SQLE	274 (7)
eicosapentenoic acid		chemical drug		0.694		0.000289	ACAT1,CAT,CD40,CD44,CEBPD,CSF1R,IL1B,IL1R2,JUN,MMP8,MMP9,NFKB1,PSMB3,PSMC2,PSMC6,SOAT1,TNFRSF1A,TNFRSF1B,TP53,UBE2B	414 (14)
Pdgf (complex)		complex		0.609	bias	0.000295	BAX,Ccl2,CD44,CDKN1A,EGR1,EIF2S1,EIF4E,F10,FN1,ICAM1,INHBA,JUN,JUNB,MCM6,MCM7,MYC,NCAM1,PCNA,PLAUR,TP53,VCAM1	595 (15)
clofibrate		chemical drug		1.967	bias	0.000295	ACAA1,ACADL,ANXA7,BAX,BSG,CCNB1,CDS2,CEACAM1,ECI1,FAS,GADD45A,GSTP1,HADHA,HADHB,Hmgn2 (includes others),IL1RN,Mt1,MYC,NAP1L1,PDCD4,UCP2	957 (22)
calphostin C		chemical - kinase inhibitor	Inhibited	-2.437	bias	0.000313	BIRC5,CDKN1A,DUSP1,ECE1,FN1,HSP90B1,HSPA5,ICAM1,MMP9,MSR1,MYC,P4HB,PDIA4,S100A8,SCARB1,TP53	473 (15)
NLRP12	-0.444	other		1.269	bias	0.000319	CASP1,CXCR4,HLA-A,HLA-E,HLA-G,ICAM1,IL1B,IL1RN,JUN,LY96,PSMB8	533 (15)
mercuric chloride		chemical toxicant				0.000319	CDKN1A,GADD45A,HP,HSP90AA1,HSPA1A/HSPA1B,HSPA9,JUN,JUNB,Mt1,Orm1 (includes others),TXN	1002 (20)
NRG1		growth factor		-1.669	bias	0.000324	ACAT1,BIN1,CAPN1,CCND3,CDKN1A,CHCHD3,CXCR4,DAD1,DUSP1,EEF1A1,EGR1,ETFB,FABP5,FN1,G3BP1,GDA,GPI,GPS2,GPX3,HNRNPK,IDH3B,IER2,IMMT,ITGAM,JUN,JUNB,LMO4,MGLL,MMP9,MSR1,MYC,PDCD4,PLAUR,PXN,SDHA,SLC2A3,TF,VIM	623 (19)
3-aminobenzamide		chemical toxicant		-1.118	bias	0.00034	CDKN1A,ICAM1,IL1B,ITGAL,PARP1,PCNA,TP53	414 (15)
formoterol		chemical drug		0.618	bias	0.00034	CALR,CXCR2,EBI3,MMP9,PSMA3,PSMA4,UBE2B
miR-16-5p (and other miRNAs w/seed AGCAGCA)		mature microRNA	Inhibited	-4.18	bias	0.000341	ANAPC16,ARHGDIA,ARL2,CAPRIN1,CCND3,EIF2B2,EIF4E,FAM69A,GRN,H3F3A/H3F3B,HSP90B1,HSPA1A/HSPA1B,IFRD1,JUN,KIF23,LAMTOR5,MAP2K1,MRPL20,OGT,PDCD4,PDCD6IP,PISD,PLK1,PNP,PPIF,PSAT1,RAF1,RARS,SLC16A3,TMEM109,TOMM34,TPI1,TXN2,UCP2,YIF1B
phenethyl isothiocyanate		chemical drug				0.000341	BAX,BIRC5,CAPN2,CCDC115,CCT4,EEF2,GATD3A/GATD3B,GOLGA7,H2AFZ,HSP90AA1,IDH1,MGST1,MGST3,PCNA,PSMA6,PSMB3,RPL3,RPL5,TMED2,TTC1,TXN,TXNL1	654 (20)
CASP8	0.434	peptidase		1.236		0.000349	BID,CASP1,CASP8,CD14,CD44,CSE1L,FAS,HDAC1,HDAC3,Ifi202b,IL1B,MMP9,NLRP3,S100A9	441 (15)
iron		chemical - endogenous mammalian		0.325		0.000349	CCNB1,CCND3,CDKN1A,EIF3A,FBXL5,FTL,GADD45A,HFE,LCN2,MCOLN1,Mt1,PPP1R15A,SLC40A1,TF	627 (20)
HDL		complex		-0.643		0.000354	ATF3,Ccl2,CCR2,CD40,CX3CR1,HSPA5,ICAM1,IL1B,INSIG1,ITGAM,ITGB1,ITGB2,VCAM1	537 (16)
NOS2		enzyme		-1.609		0.000358	ADH5,API5,BAX,BIRC5,Ccl2,Ccl9,CD14,CD44,CDKN1A,COX4I1,CSF3R,CTSC,CYCS,Erdr1,FAS,IL1B,IL1RN,LCN2,LGALS3BP,MCM5,MMP9,Orm1 (includes others),PCNA,PLSCR1,S100A8,SLC1A5,SLC40A1,SLFN12L,Slfn2,SPR,TKT,TNFSF13B,TOR3A	520 (17)
RASSF6		other		1.067	bias	0.000359	BAX,BTG2,CDKN1A,TP53	233 (7)
DDX21		enzyme	Activated	2	bias	0.000359	GPAA1,PSMB4,RPS21,RPS3
TYMS		enzyme		-1.067	bias	0.000359	CDKN1A,FAS,MYC,TP53	691 (13)
GNL2		enzyme		1.969	bias	0.000359	CCNA2,CDKN1A,MYC,TP53	695 (21)
ARNT		transcription regulator		0.735	bias	0.000375	ATP5MC1,ATP5PO,CD81,CDK4,CLDN1,COX6B1,CTSD,CXCR4,EIF6,ENO1,GPI,KIF20A,MPP1,NDUFS2,NDUFS3,PGK1,PGM2,RANBP1,RANGAP1,SLC2A3,TP53,TPI1,UBE2C,VIM	835 (17)
EGF		growth factor		1.281	bias	0.000381	ATF3,AURKA,AURKB,BIRC5,BTG2,CASP1,Ccl2,CCNB1,CCND3,CD44,CDK4,CDKN1A,CEBPD,CEBPE,CSF1R,CTSD,CXCR4,DAD1,DUSP1,EEF1A1,EGR1,ERCC1,FAM89B,FN1,GADD45A,GPS2,GSTP1,HNRNPK,ICAM1,IDH1,IER2,IL1B,IL1R2,INHBA,ITGAM,ITGB1,JUN,JUNB,KLF10,LCN2,LTF,MMP9,MYC,NCAM1,NCF1,NRP1,PCNA,PDCD4,PLAUR,PLSCR1,PLXDC1,PPIB,PSMB1,PSMB2,PSMB3,PSMB4,PSMB5,PSMB6,PSMB7,PTTG1,RRM1,S100A10,S100A4,S100A9,TF,THBS1,TP53,TUFM,VASP,VCAM1,V…	710 (17)
NELFB		other		0.816		0.000382	ATF3,CDKN1A,GADD45A,Ifi27l2a/Ifi27l2b,RPLP0,RPS3
CACNA1A		ion channel				0.000382	BTG1,Ccl2,CD68,GRN,IL1B,ITGAM
SR 144528		chemical reagent		1.664	bias	0.000382	CCR1,CCR2,EGR1,ICAM1,IL1B,IL1RN	342 (11)
cucurbitacin B		chemical - endogenous non-mammalian		-0.943		0.000382	BIRC5,CCNA2,CCNB1,CDKN1A,MYC,TP53	376 (15)
MITF		transcription regulator	Activated	3.536	bias	0.000388	ACO2,Acp5,ACSL1,ASAH1,ATP1A1,ATP6V1B2,ATP6V1C1,AURKB,CCNB1,CD44,CDCA3,CDCA8,CDT1,CENPM,FN1,GM2A,HMBS,IL6R,IVNS1ABP,KIF20A,LGALS3,LYST,MCM2,MCM5,MCM6,MDH1,NPM3,PLK1,QDPR,RAB27A,RFC5,SCARB1,SOX13,STX7,TACC3,TNFRSF14,TP53,TXNIP,UBE2C	784 (19)
ATF3	0.843	transcription regulator		-0.423		0.00039	ADIPOR1,ATF3,AURKA,AURKB,CD82,CDK4,CDKN1A,GSN,HSPA5,ICAM1,IL1B,ITGA1,JUN,NFKB2,PLK1,PPP1R15A,SLC11A1,SRI,TP53,XBP1	714 (20)
n-nitrosomethylbenzylamine		chemical toxicant				0.000394	AHNAK,BAX,CCDC115,CD44,CDK4,CLDN1,COPS5,GATD3A/GATD3B,GOLGA7,H2AFZ,HSP90AA1,IDH1,KLF10,LAMP2,MGST1,MGST3,NDEL1,PCNA,PHGDH,PSMA6,TMED2,TTC1,TUBB6,TXNL1,UBE2C,YWHAH
LIN9		other	Activated	2.03	bias	0.000396	AURKA,BIRC5,CCNA2,CCNB1,CDKN1A,PLK1,TMPO,UBE2C
CYP2J2		enzyme		-0.744		0.000396	Ccl2,CD44,CD82,ICAM1,IL1B,MMP9,NME1,VCAM1	426 (13)
geranylgeranyl pyrophosphate		chemical - endogenous mammalian		-0.788		0.000396	BAX,BIRC5,CD55,ICAM1,IL1B,MMP9,SCARB1,TP53,VCAM1	679 (17)
hydroxyurea		chemical drug		1.197	bias	0.000405	BAX,CCNB1,CCND3,CDKN1A,GADD45A,GINS2,GMNN,GPX1,H2AFX,MCM2,MCM5,MYC,TK1,TP53,UHRF1	792 (21)
Rb		group	Inhibited	-3.491	bias	0.000407	AURKB,BIRC5,CCNA2,CDKN1A,CDT1,GMNN,HDAC1,MCM3,MCM5,MCM7,MYC,Ngp,PA2G4,PCNA,PLK1,TOP2A,TP53	730 (19)
4-methylnitrosoamino-1-(3-pyridinyl)-1-butanone		chemical toxicant		-1.319	bias	0.000415	ALOX5,ANXA1,CDKN1A,HP,JUN,JUNB,LCP1,NFKB1,TF,TKT,TP53	745 (20)
benzo(a)pyrene		chemical toxicant		-0.009	bias	0.00042	ANXA1,ARHGDIA,ARL6IP5,BAX,BIRC5,CDK2AP2,CDKN1A,CKS1B,COMT,DDB1,ESD,GSTP1,HP,HSPA1A/HSPA1B,Hspa1b,IL1B,INHBA,JUN,LCP1,MAFG,MAP2K1,Mx1,PCNA,PDCD6,PDLIM1,PGD,PPIF,RAE1,SELENBP1,TAF6,TF,THBS1,TKT,TM2D2,TP53,TSPAN31,XPC	855 (21)
BNIP3L		other		-1.604		0.000428	AURKA,Ccl2,CCNA2,CCND3,CDKN3,CST3,GADD45A,GPSM2,GSN,IL16,LTB,MAP4K1,NFKB2,TOP2A	751 (12)
D-galactosamine		chemical - endogenous mammalian		1.676	bias	0.000439	BAX,CASP1,CASP8,CD14,CTSB,EDNRA,ICAM1,JUN,JUNB,MYC,TNFRSF1A,TRADD	542 (16)
ZFP36	-0.538	transcription regulator		-0.496	bias	0.000444	CAMP,CDKN1A,CENPA,CTSS,CYBB,ICAM1,IL1B,JUN,LCN2,LTF,MXD1,Ngp,OSM,PLAUR,S100A8,S100A9,SERINC3,TOP2A,VCAM1	494 (15)
NLRP3	-0.278	other	Inhibited	-2.703		0.000444	Ccl2,CDCA8,FN1,H2AFX,IL1B,MAPK13,MMP9,MSR1,NFKB2,PARP1,PARP2,POLB,PTTG1,RELB,RFC3,TNFSF13B,TP53,UBE2N,VIM	519 (14)
Insulin		group	Activated	2.481		0.000447	ACAT1,ACSL1,ADIPOR1,ARG2,ATF3,Atp5e,ATP5MC2,BIRC5,BSCL2,Ccl2,CCND3,CDKN1A,CYBB,DBI,DUSP1,EGR1,FN1,FTL,GSTP1,HNRNPK,HPSE,HSD11B1,HSP90B1,HSPA5,ICAM1,INSIG1,JUN,KLF4,LGALS3BP,MCM6,MCM7,MMP9,MTCH2,MYC,NCF1,NDUFA1,NDUFB9,OGT,Orm1 (includes others),PGK1,PKM,PPP1R15A,PRKCD,RETSAT,Rpl32,RPS16,RPS6,SCARB1,SLC25A5,SLC29A1,SLC2A3,SOD1,SQLE,SRSF3,TGFBI,UCP2,UQCRC2,XBP1	915 (22)
2-(4-amino-1-isopropyl-1H-pyrazolo[3,4-d]pyrimidin-3-yl)-1H-indol-5-ol		chemical reagent	Inhibited	-3.206		0.000449	ASF1B,ATF3,AURKA,AURKB,BIRC5,CCNB1,EGR1,HIST1H1C,HIST1H2BI,IFRD1,KPNA2,SERPINB1,TCP11L2,TK1,TOP2A,TXNIP	261 (7)
RHO		G-protein coupled receptor		-1.069		0.000488	AP2A2,B2M,CD44,CD74,CEBPD,CSF1R,CTSS,EIF2A,HFE,HIST1H1C,Mt1,NCAM1,NT5E,PLA2G7,S100A6	231 (7)
erlotinib		chemical drug		1.715		0.000488	BAX,CD14,CD40,CYBB,EGR1,ICAM1,IKBKB,IL1B,NFKB2,RELB,SLC2A3,Tmsb4x (includes others),TNFRSF1A,TNFRSF1B,TRADD	590 (18)
TRAF2		enzyme		1.478		0.000503	ANXA4,AURKA,AURKB,CCNB1,CCR1,EBI3,FAS,FFAR2,ICAM1,ITGB1,MMP9,MPEG1,NFKB1,PLBD1,PLK1,PYGL,SNRNP25,TK1	721 (17)
FGFR1		kinase	Activated	2.998	bias	0.000516	BAX,BIRC5,CDKN1A,EBI3,EEF1A1,EIF1AX,EIF3C,EIF4E,EIF5A,GRINA,JUN,LEPROT,MYC,NXF1,PDCD4,PLAUR,PLXNB2,RPS6,VIM	822 (23)
prostaglandin A2		chemical - endogenous non-mammalian		-0.857		0.000531	CDK4,CDKN1A,ICAM1,LPAR6,PCNA,TP53,VCAM1	550 (22)
QKI		other		-0.342		0.000531	CSF1R,H2AFY,HNRNPF,PEA15,PTPRO,VCAM1,VIM	155 (4)
NSD2		enzyme				0.000535	BAX,BTG2,CXCR4,ERCC1,GADD45A,HAT1,ITGB1,ITGB7,JUN,Mx1,OAS1
trabectedin		chemical drug		-1.89	bias	0.000545	ARL6IP1,CDKN1A,GADD45A,H2AFX,LGMN,MCM5,NXF1,OAT,TK1
STAT4	-0.302	transcription regulator		1.852	bias	0.000547	ACADL,ACAP1,AHNAK,AP2A2,BSG,C3,COPG1,DAP,DPM3,GBE1,H3F3A/H3F3B,HIST2H2AA3/HIST2H2AA4,HLA-DQB1,Hspa1b,Ifi202b,IL10RA,IL18RAP,KDELR2,KDM6B,LRRFIP1,MAP3K1,Ms4a4b (includes others),Mt1,MTHFS,Mx1,MYC,PLAC8,POLD4,PYGL,RASSF1,RGCC,S100A4,SELENBP1,SERPINB1,SLC2A3,SMPDL3A,VDAC1	343 (10)
Irgm1		other	Inhibited	-2.891	bias	0.000552	AURKB,CCNA2,CCNB1,CCNB2,CDCA3,FAS,IFI16,Ifi27l2a/Ifi27l2b,KIF20A,NUPR1,TK1,UBE2C
NME1	0.818	kinase		1.729		0.000552	BAX,CDK4,CDKN1A,CTSD,EXOSC8,FBL,HNRNPA2B1,NOP58,PA2G4,PABPC1,RAE1,TP53	758 (22)
Ro31-8220		chemical - kinase inhibitor		0.476	bias	0.000552	CD55,CDKN1A,CLDN1,DUSP1,EGR1,FN1,ICAM1,IL1B,ITGB1,Mt1,PDCD4,VCAM1	642 (18)
staurosporine		chemical - kinase inhibitor		0.439		0.000563	ANXA5,BTG2,Ccl6,CDK4,CDKN1A,CPNE3,CREG1,CSF3R,FAS,HDC,ICAM1,IL1B,ITGB2,KLF10,MMP9,MYC,NCF1,PHB,PRDX1,RPS11,Srgn,TK1,TP53	806 (20)
prostaglandin A1		chemical - endogenous non-mammalian		-0.985		0.000571	CD14,CDKN1A,HSPA1A/HSPA1B,HSPA4,LPAR6,PCNA,SOAT1,TP53	733 (24)
zinc		chemical drug		-0.868		0.000587	BAX,BLMH,CAT,CCNB1,CDK4,ENO1,FAS,IL1B,KPNA2,LIPA,MAFG,MAP2K1,Mt1,NDUFB8,NPM1,SELENBP1,SLC39A7,TP53	726 (19)
LY294002		chemical - kinase inhibitor	Inhibited	-2.273	bias	0.000594	ACAT1,ADIPOR1,ATF3,ATP2B1,AURKA,BAX,BCL6,BIRC5,BSG,Ccl2,CCNA2,CCNB1,CCND3,CCR1,CCR2,CD14,CD44,CD74,CDK4,CDKN1A,CDKN2D,CST3,DUSP1,EGR1,EIF1AX,ERCC1,FAS,FEN1,FEZ2,FN1,G3BP1,GPR183,GRN,GSTP1,HSP90AB1,HSPA5,ICAM1,IER2,IL1B,IL1R2,IL1RN,ITGAM,JUN,JUNB,KLF10,LCN2,LMNA,LMO4,MAT2A,MMP9,MXD1,MYC,MYEF2,P2RY6,PCNA,PGK1,PMPCB,PRDX1,RAB6A,RAP1A,RND3,SCARB1,SQLE,THBS1,TNFRSF1B,TOP2A,TP53,TREM1,UBE2C,VCAM1,VCAN,…	504 (17)
paclitaxel		chemical drug		0.262		0.000624	ADORA2B,ANXA5,ATF3,BAX,BIRC5,BTG2,CD40,CD44,CDC20,CDKN1A,CYP4F2,EGR1,EMP1,FAS,G0S2,GRINA,H2AFX,HDAC3,HLA-A,HPSE,HSP90AB1,ICAM1,IER2,IKBKB,IL1B,JUN,KDM6B,KIF20A,LCP1,MAP3K1,MMP9,MYC,PCNA,PHGDH,PLAUR,RAC2,RAF1,RBM3,RFTN1,S100A9,SLC2A3,STMN1,THBS1,TP53,TUBA1B,UHRF1	744 (18)
MAP2K7		kinase		0.106		0.000632	ATF3,CDKN1A,ERCC1,FAS,FCGRT,FN1,HSPA5,ITGB1,JUNB,KLC1,MYC,P2RX4,PDIA3,RPS6	696 (17)
E. coli lipopolysaccharide		chemical - endogenous non-mammalian		-1.738	bias	0.000633	Ccl2,CD40,CEBPD,EBI3,FDPS,ICAM1,IL1B,MMP9,MVD,S100A8,S100A9,TF,TREM1,TREM2,TREM3,VCAM1	512 (15)
1,4-bis[2-(3,5-dichloropyridyloxy)]benzene		chemical toxicant	Activated	3.231	bias	0.000637	ACADL,CCNA2,CCNB1,CCNB2,CDC20,CDK4,CDKN1A,CKAP4,CYP27A1,FAM107B,GSTP1,ICAM1,INSIG1,LRG1,MCM5,MCM6,MCM7,Mt1,PAPSS2,PSMB7,SLC29A1,TNFRSF1A,UCP2	693 (12)
alvocidib		chemical drug		-1.208	bias	0.000639	AEN,AIF1,BIRC5,CCNB1,CCND3,CDKN1A,ITGAM,PCNA,TP53,TXN	692 (22)
MAPK9		kinase		-1.173	bias	0.00064	BAX,Ccl2,CDKN1A,CDT1,EGR1,EIF4E,FAS,FGL2,GADD45A,HDC,IER2,IFI16,IL1B,JUN,JUNB,LGALS3BP,LMNA,LSM3,MARCKSL1,METAP2,MIF,MMP9,MYC,NME2,PDIA3,PPP1R15A,RPSA,SLFN12L,TP53	642 (17)
HIF1A		transcription regulator		1.282	bias	0.000646	ADAM15,ADORA2B,ATP5PF,AURKA,BID,BIRC5,Ccl2,CCR2,CD44,CDKN1A,CLDN1,CTSD,CXCR4,EIF4E,EIF5A,ENO1,FN1,GBE1,GPI,H2AFX,HDAC3,HIST1H1C,HP,HSPA4,HSPA5,IL1B,ITGA1,ITGB2,JUN,LGALS1,MANF,MIF,MMP9,MYC,NPM1,NT5E,NUDCD2,PDHA1,PFKL,PGK1,PKM,PLAC8,PLAUR,PPIA,PROM1,RASSF1,SLC16A3,SLC29A1,SLC2A3,SLC39A7,SLC40A1,SSBP1,SUMO1,THBS1,TP53,TPI1,TXN,VASP,VCAM1,VIM	779 (19)
Pkc(s)		group	Inhibited	-2.497	bias	0.000649	ACAT1,ARG2,ATF3,CCND3,CCR2,CD55,CDKN1A,CLDN1,CTSB,CXCR4,CYBB,DNAJC3,DUSP1,EGR1,FAS,FN1,GADD45A,HSP90B1,HSPA5,IL1B,ITGB1,JUN,JUNB,LIPA,MMP9,MSR1,NFKB1,P4HB,PDIA4,PPP1R15A,RARA,S100A1,S100A8,SCARB1,VCAM1,XBP1	890 (21)
COL1A1		other				0.000653	CDKN1A,CLIC4,CXCR4,ICAM1,PCNA,VCAM1	302 (7)
PLA2G2D		enzyme		0	bias	0.000653	Ccl2,CCR2,CD68,IL1B,ITGAM,S100A9	495 (12)
RPL22	0.365	translation regulator				0.000653	ATF3,BAX,CDKN1A,DNAJC3,HSPA5,XBP1	365 (10)
PSMB9	0.325	peptidase		-0.849		0.000662	HLA-A,NFKB1,NFKB2,RELB,RPS3	552 (9)
NELFA	0.28	other				0.000662	BSG,CCNB2,CDKN1A,JUNB,TOP2A
AP3B1		transporter				0.000662	AP3M1,CD63,LAMP1,LAMP2,TNFRSF1A
tangeretin		chemical - endogenous non-mammalian				0.000662	BAX,BID,CDKN1A,FAS,TP53	536 (21)
PRKCE		kinase		-0.728	bias	0.000665	BAX,BIRC5,CCND3,CD55,CDKN1A,EGR1,FCGR1A,HSP90AB1,HSPA5,IL1B,JUN,JUNB,MMP9,MYC,NFKB1,PDCD4,VCAM1	384 (14)
OGT	-0.317	enzyme		1.67		0.000665	ACO2,BAX,BIRC5,CDKN1A,ETFB,JUN,MYC,NDUFA5,NDUFA6,NDUFA9,NDUFB6,NDUFC2,OGDH,PLK1,SUCLG1,TP53,VIM	750 (17)
propofol		chemical drug		0.647	bias	0.000683	ANXA1,BAX,CD14,CYBB,EGR1,IL1B,MMP9,NCF1,SOD1,THBS1,TP53	642 (19)
NCOR1		transcription regulator		-1.724	bias	0.000689	CCNA2,CD82,CDKN1A,CEBPE,COX8A,CSF3R,DBI,DDT,DUSP1,HP,IL1B,MMP9,MRPS18B,MTA2,NDUFV1,PRKCD,RARA,SORD,UQCRQ	654 (22)
Sb202190		chemical - kinase inhibitor		1.218	bias	0.000689	ALOX5,ATP5MF,BIRC5,CAMP,Ccl2,Ccl9,CCND3,CD55,CDKN1A,EBI3,EGR1,FN1,FPR2,HSPA5,ICAM1,IL1B,JUNB,MMP9,PRDX1,RETSAT,S100A8,TMEM173,TP53,VCAM1	744 (18)
thymoquinone		chemical - endogenous non-mammalian	Activated	2.157		0.00069	BAX,BIRC5,CASP1,CAT,CD14,CDK4,CDKN1A,CXCR4,H2AFX,MMP9,PKM,TP53	533 (20)
PLN		transporter				0.000699	ADAM9,ATP1A1,ATP2B1,CALU,ENO1,HSP90B1,ITGB1,NUMB,PGK1,RAB5B,RAP1A,SOD1,TPI1,VCP,VIM
epoxomicin		chemical - protease inhibitor		0.613	bias	0.000737	H2AFZ,HSPA5,OPTN,PSMA2,PSMA6,PSMB1,PSMB3,PSMB4,PSMB5
GNA15		enzyme				0.000747	C3,Ccl2,CEBPD,CYCS,GADD45A,GDA,HLA-E,HSD3B7,IL1RN,LGALS3,MAT2A,MGST1,MGST2,Mt1,MYC,NFKB1,PDLIM1,SELENBP1,SLC29A1,SYNE1,VCAN,ZFP36L1	556 (17)
medroxyprogesterone acetate		chemical drug		-1.145		0.000774	BAX,BIRC5,BTG2,Ccl2,CCNB1,CCNB2,CD44,CLDN1,CXCR4,FAS,FN1,HSD11B1,ICAM1,IL1B,IL6R,ITGB1,ITGB2,JUN,JUNB,LMNA,MCM5,MYC,SLPI,VCAN	875 (23)
ALKBH5		enzyme				0.000791	ASAH1,BLVRB,CTSD,EEF1D,FBXL5,GSTM5,HSPA8,NONO,PRDX4,RACGAP1,RARA,RPA1,RPLP0,SDHD,SOD1,TMBIM6,UBA1,UHRF1
CDK1		kinase	Activated	2.425	bias	0.000798	BIRC5,CDC20,CDKN1A,H2AFX,JUN,NDUFB10,XBP1	809 (22)
Ifn		group		1.358	bias	0.000811	B2M,BCL6,CASP8,CD40,CD44,CFH,FAS,HLA-A,ICAM1,IFI16,Ifi202b,IFITM3,IFNAR1,IL10RA,IRF8,LCN2,MAVS,MMP9,Mx1,OAS3,S100A8,TNFSF13B,TP53	425 (16)
POU2F1		transcription regulator				0.000811	ACSL1,APEX1,BCL6,CD55,CSF1R,FRRS1,GADD45A,GPX3,GSTM5,H2AFX,HK3,ICAM1,IDH1,Ifi202b,LY6E,NFKB1,PDRG1,PRDX2,RDM1,REL,SOD1,TNFRSF14,VCAM1	539 (7)
RTN4		other		-0.194		0.000817	AP2A2,ARHGDIA,CAPZA2,CFL1,DPYSL2,JUN,LAP3,PEA15,RAB3D,Tpm1,YWHAB,YWHAG,YWHAQ	706 (7)
brivudine		chemical drug				0.000827	APEX1,DDX1,UBE2N
TTC5	0.337	other				0.000827	BAX,CDKN1A,TP53	647 (16)
SDF4		other				0.000827	BAX,HSPA5,XBP1	314 (10)
RPS14	1.138	translation regulator				0.000827	MYC,S100A8,TP53
AHCY	0.793	enzyme				0.000827	GPX1,ICAM1,VCAM1
glycosylated somatostatin derivative smsDX		chemical reagent				0.000827	HSPA5,TOMM40,VDAC2
EEF1A1	1.647	translation regulator				0.000827	CCNA2,MYC,S100A4
C20-D3-vitamin A		chemical drug				0.000827	C3,CFB,CFP
10-decarbamoylmitomycin C		chemical toxicant				0.000827	CDKN1A,GADD45A,TP53	502 (7)
AVI-4126		biologic drug				0.000827	MYC,PCNA,TP53
PGR		ligand-dependent nuclear receptor		0.814	bias	0.000828	ACSL1,BCL6,BTG1,CAPN2,CCNB1,CCNB2,CCND3,CD44,CDC20,CDKN1A,CEBPD,CKAP4,COMT,CTSD,DPYSL2,EDNRA,EIF1AX,FAM49A,FAM89B,FN1,ICAM1,ITGB1,KLF4,MAT2A,MBOAT7,MVP,MYC,NOP16,P2RX4,PAPSS2,PCNA,PDLIM1,PISD,PPIF,S100A6,S100A8,SLC31A2,SRSF7,TGFBI,TK1,TSC22D3,VASP,VCAN	703 (18)
PAK1		kinase		0.327		0.00083	CCNB1,CDKN1A,CTSD,FN1,ITGAM,ITGB2,MMP9,MYC,SCARB1,TP53	822 (18)
12-(3-adamantan-1-yl-ureido) dodecanoic acid		chemical reagent		-0.577		0.000831	API5,BAX,BID,BIRC5,CASP6,CASP8,CD40,DAD1,FAS,NFKB1,PRDX2,PYCARD,TNFRSF1A,TNFRSF1B,TRADD
BMI1		transcription regulator		1.02		0.000831	AURKA,BTG2,CASP8,CD63,CDKN1A,CDKN2D,CUL1,CYFIP2,FAS,H2AFX,MCM3,NFKB1,RRM1,TP53,VIM	688 (18)
Growth hormone		group		1.75	bias	0.000834	ACAA1,ACSL1,AKR1A1,AKR1B1,ATP5MC2,BCL6,BPHL,C3,CAT,CEBPD,CLDN15,COMT,DDT,EGR1,FDPS,FN1,GLUD1,GSTM5,GSTP1,HADH,HADHB,JUN,JUNB,KLF10,MMP9,MYC,PCNA,PPP1R15A,PRDX3,SCARB1,SOD1,TF,TKT,TUBA1A,TXNIP,UQCRHL,ZEB2	659 (21)
CXCL12		cytokine		-0.299	bias	0.000835	AIF1,BAX,CANX,CD14,CD44,CD82,CD9,CXCR4,DAD1,EGR1,ERCC1,FAS,FN1,ICAM1,IFNAR2,IL1B,ITGAL,ITGB1,JUN,JUNB,Ly6a (includes others),MMP9,MYC,PRKCD,RANGAP1,RAP1A,SSBP1,STRAP,TF,THBS1,TNFRSF1B,TP53,VIM	667 (18)
VCAN	0.471	other		-0.457		0.00084	ASS1,C3,Calm1 (includes others),CASP1,Ccl2,CDKN1A,CRISPLD2,EBI3,FABP5,FAS,FN1,ICAM1,IL1B,IL1RN,IRF8,ITGB1,LCN2,LGALS3,MIF,MMP9,NFKB1,OAS3,PRDX5,RNASE4,TP53,Tpm1,VCAM1,VCAN	389 (16)
simvastatin		chemical drug		1.076		0.00084	ANXA1,ANXA3,ARHGDIA,BAX,BIRC5,C5AR1,CD14,CD40,CD55,CD81,CD9,CDKN1A,CYBB,HIST1H1C,ICAM1,IL1B,ITGAL,ITGB2,KLF4,LCN2,Ly6a (includes others),MAP1LC3B,MMP9,MYC,NCF1,NONO,PGLYRP1,RAF1,S100A6,SCARB1,SOAT1,ST6GALNAC4,Tpm1,VCAM1,VIM	420 (16)
SET	0.78	phosphatase	Inhibited	-3.162	bias	0.000863	CORO1C,COX7A2L,FDPS,H2AFZ,MRPL22,MRPS14,MRPS30,PTGES3,SRP72,TMED2,ZCCHC17
pristane		chemical toxicant	Activated	2.401	bias	0.000863	Ccl2,FN1,HNRNPA2B1,IFI16,IL1B,IRF5,IRF8,Ly6a (includes others),Mx1,TNFSF13B,VIM	354 (10)
MYB		transcription regulator		1.456	bias	0.000868	ATP2B1,BAX,BIRC5,CASP6,CCNB1,CLTA,COPA,CXCR4,FN1,HSPA5,HSPA8,IQGAP1,JUN,KLF4,MAT2A,MYC,PCNA,PDE2A,PRTN3,RGCC,SLC1A5,SLC25A3,TFEC,VIM	843 (19)
dimethyl sulfoxide		chemical drug		-0.615	bias	0.000868	ALOX5,ANXA1,B3GNT8,BIRC5,CALR,CCND3,CEBPE,EMP3,HEBP1,HSP90AB1,IFI16,IL1B,ITGAM,ITGB2,JUN,LCN2,MYC,NCF1,NUPR1,PBXIP1,PRKX,SGMS2,Tpm1,VCAM1	581 (16)
TNFSF10		cytokine		1.196		0.000896	BAX,BID,BIRC5,CASP8,CD14,CSE1L,CTSB,CXCR4,HLA-A,IFI16,IFITM2,IL1B,IL1RN,ITGAM,JUN,MMP9,PCNA,PSME2,TAF6,TP53	669 (16)
PRDM1		transcription regulator		-0.191		0.000905	ADAM8,ARG2,BCL6,Ccl2,CD44,CD74,CFH,CLDN1,CLTA,CRISPLD2,CXCR4,ECM1,F5,FGR,GBE1,HIST2H2AA3/HIST2H2AA4,HLA-DQA1,Ifi202b,IL18RAP,IL1B,IRF8,LGALS1,MAFB,MMP25,MYC,NLRP12,NLRP3,PLAC8,PSMB10,PSMB8,S100A8,S100A9,SWAP70,TNFRSF13B,TNFSF13B,TRIB1,XBP1	471 (15)
diethylnitrosamine		chemical toxicant		-0.811		0.000914	CASP8,CD63,CDKN1A,CSTB,GSTP1,Hspa1b,LCN2,Mt1,MYC,NFKB1,OAT,PCNA,PLSCR1,PROM1,Rpl36,SELENBP1,SOD1,TP53	750 (19)
S100A6	-0.337	transporter	Activated	2.333		0.00098	ATF3,AURKA,CDKN3,CENPA,DHRS9,EXOSC8,INHBA,NCAPH,TMPO	503 (7)
deoxynivalenol		chemical toxicant		-0.643	bias	0.00098	CCNB1,CLDN1,DNAJC3,HSPA5,ICAM1,IL1B,PAPSS2,PCNA,XBP1	668 (22)
platelet activating factor		chemical - endogenous mammalian		-1.71	bias	0.000991	CDKN1A,EGR1,FN1,ICAM1,ITGAM,ITGB2,MMP8,MMP9,PLA2G7,PLAUR,PRTN3,THBS1,VIM	718 (20)
MAPKAPK2		kinase		-0.14	bias	0.000991	Ccl2,CEBPD,HDC,HSPA5,ICAM1,IL1B,LMO4,MMP9,MSR1,NFKBIB,TOP2A,TP53,VCAM1	578 (17)
MMP1		peptidase		1.785	bias	0.000991	BAX,CDK4,CDKN1A,EGR1,FN1,JUN,MAP2K1,MMP9,MTA2,MYC,NFKB1,PLTP,S100A4	450 (16)
DCN		other		0.912		0.000991	BAX,CASP8,CDKN1A,DUSP1,HLA-DQA1,HLA-DQB1,ICAM1,IL1B,ITGB1,MMP9,THBS1,TP53,VCAM1	561 (18)
FMR1		translation regulator	Inhibited	-2.534	bias	0.000991	ATP5IF1,ATP5MG,CFL1,EEF2,EIF1AX,ENO1,FXR1,MMP9,PFN1,PPIA,RPSA,UQCRFS1,UQCRQ	546 (7)
ID2		transcription regulator		-0.743		0.000992	BATF,BCL6,BTG2,CCNB1,CCR1,CD44,CDK4,CDKN1A,CXCR4,DUSP1,DUSP22,EEF1D,ICAM1,IFI16,IFNGR1,IL10RA,IL6R,IRF5,IRF8,ITGA1,KLF7,LGALS1,LMO4,LTB,MYC,REL,RELB,SOX13,TF,TNFRSF1A,TUBA1A,VCAM1	567 (12)
SERCA		group		0	bias	0.000995	BTG2,EGR1,JUN,MYC	298 (10)
SIRT7		enzyme	Activated	2	bias	0.000995	GPAA1,PSMB4,RPS21,RPS3
KLF17		transcription regulator				0.000995	CDKN1A,FN1,TP53,VIM	502 (7)
EIF3M	0.691	other	Activated	2	bias	0.000995	EIF3C,EIF3F,EIF3H,MIF
ATP2B2		transporter		0		0.000995	BAX,CALR,HSPA5,XBP1	586 (9)
TP53RK		kinase		1.982		0.000995	PSMA3,PSMB5,PSMB7,RRM1
CASP2		peptidase		0.481	bias	0.000995	BID,BIRC5,NCAM1,NFKB1	223 (7)
beta-hydroxyisovaleric acid		chemical - endogenous mammalian		-0.958	bias	0.000995	PSMB3,PSMC2,PSMC6,UBE2B
IL12 (complex)		complex		-0.559	bias	0.000998	ACADL,CASP1,Ccl2,CCR2,CD44,CD63,CEACAM1,CYTIP,DDB1,EBI3,FAS,ICAM1,Ifi202b,IFNGR1,IL18BP,IL18RAP,IL1B,IRF8,ITGAL,ITGB2,JUN,LTB,Ly6a (includes others),MIF,MMP9,Ms4a4b (includes others),Mx1,MYC,PDCD4,PLAC8,RPA1,SET,TNFRSF1A,XPC	522 (15)
KIT		transmembrane receptor				0.00102	BIRC5,C3AR1,Ccl2,CCND3,CCR2,CD44,CD63,CXCR4,HDC,HSD17B10,ICAM1,ITGAM,ITGB2,LGALS3,LTB4R,MGST2,MYC,OSM,Ppp2r5c,PPP2R5D	502 (16)
cycloheximide		chemical reagent		-0.587		0.00103	ASS1,B2M,BAX,BTG2,CALR,CAT,CCND3,CCR1,CD44,CD55,CDK4,CDKN1A,CDKN2D,CEBPD,CXCR4,DUSP1,EEF1A1,EEF1D,EGR1,FAS,FN1,GADD45A,GAS7,HEXA,HSD11B1,ICAM1,IL1B,IL1R2,IL1RN,ITGAM,JUN,JUNB,KDM6B,LCN2,Mt1,MXD1,MYC,NPM1,OSM,PGK1,PLAUR,PLK1,PXN,RBM3,RELB,S100A8,SCARB1,SIVA1,SNRNP70,SRSF7,THBS1,TK1,TP53,VCAM1	488 (15)
MAP2K1/2		group		0.202	bias	0.00105	ARG2,ATF3,C3,Ccl2,DUSP1,EGR1,H2AFX,HSPA5,IL1B,JUN,MMP9,MYC,NFKB1,PCNA,RRM1,SCARB1,VIM	399 (14)
IGF2		growth factor	Activated	2.169		0.00105	ARHGDIA,BIRC5,CASP6,Ccl2,CDKN1A,CTSV,CXCR4,DUSP1,EGR1,FEN1,FN1,GADD45A,GRN,IDH1,IER2,Ifi202b,IFITM2,JUNB,MCM2,MCM5,MCM7,MYC,PDCD4,RRM1,TGFBI,TOMM40,TP53,UHRF1,ZNRD1	544 (19)
N(2)-(gamma-D-glutamyl)-meso-2,2'-diaminopimelic acid		chemical reagent		-0.64	bias	0.00105	CASP1,Ccl2,ICAM1,IL1B,ITGB2,MMP9	304 (10)
CSF3R	-1.55	transmembrane receptor				0.00105	CD14,CEBPE,CSF3R,FCGR1A,ITGAM,LTF	296 (7)
FADD		other	Activated	2	bias	0.00105	Ccl2,CDKN1A,CXCR4,EGR1,FAS,ICAM1,IRF5,JUN,JUNB,LY6E,MAP3K1,MMP9,Mx1,MYC,NFKB1,PPP1R15A,PSMB8,TRAFD1	664 (16)
E64d		chemical - protease inhibitor	Activated	2.449		0.00105	C3,CD74,HLA-DMA,ITGAM,ITGB1,TP53	785 (12)
CSF1R	0.956	kinase		1.066	bias	0.00106	Acp5,CDKN1A,CSF1R,JUN,JUNB,MMP9,MSR1,MYC,PCNA,VCAM1	631 (19)
E2F3		transcription regulator		1.544	bias	0.00107	AKNA,BIRC5,CCNA2,CCNB1,CCNB2,CCND3,CD9,CDCA3,CDCA4,CDKN1A,ECE1,HIST1H1C,HSPD1,INHBA,MALAT1,MCM2,MCM3,MCM5,MCM6,MCM7,MYC,PCNA,PLK1,PTTG1,RRM1,S100A8,THBS1,TK1,TMPO,UBE2C	802 (21)
PRKAA		group		-0.99		0.00108	BAX,BIRC5,Ccl2,CDKN1A,CLDN1,DUSP1,HSD11B1,NCF1,TP53,VIM,XPC	648 (21)
5-azacytidine		chemical drug		1.538	bias	0.0011	ATP5F1A,ATP5F1B,CALR,CANX,CASP8,CD44,CDKN1A,CLDN1,CTNNA1,DUSP1,GADD45A,GSTP1,HSP90B1,HSPA5,HSPA8,HSPD1,INHBA,IRF8,ITGAL,KEAP1,Ly6a (includes others),Mt1,RASSF1,SLC3A2,TACSTD2,THBS1,TUBB	671 (14)
Ikb		group		1.664	bias	0.00111	BLVRA,CCNB1,CFB,HHEX,HSPA5,ICAM1,MAT2A,NFKB1	315 (9)
TERT		enzyme		0.415		0.00114	ATF3,B2M,BAX,BIRC5,CALU,CDKN1A,CTSC,GSN,ICAM1,IFI16,IL13RA1,IL1B,MMP9,MYC,NOP58,NSFL1C,PLTP,PROM1,PXN,SSR3,TACC3,TK1,TP53,VIM,XBP1	887 (22)
RHOJ		enzyme				0.00116	ACTG1,ANXA1,CALU,CNBP,GSN,MYH9,RND3
mir-15		microRNA		-0.199		0.00116	BIRC5,Ccl2,CD82,EIF2B2,HSPA1A/HSPA1B,IL1B,LAMP1,MMP9,OAS1,PCNA,PLAUR,RAF1,TARBP2,TP53,UCP2	293 (11)
PDCD4	0.434	other		-0.479	bias	0.00116	ARF4,IL1B,JUN,MAP4K1,MYC,PDCD4,PLAUR	831 (19)
DPP-23		chemical reagent	Activated	2.646	bias	0.00116	ATF6B,BAX,HSP90AA1,HSPA1A/HSPA1B,HSPA5,PPP1R15A,XBP1
idarubicin		chemical drug		0.956	bias	0.00116	BAX,CD40,CDKN1A,GADD45A,IL1B,SESN1,TP53	628 (11)
FBXW7		enzyme		-0.475	bias	0.00119	ATP5F1A,BIRC5,CS,DGAT1,DGAT2,ECHS1,HSPA8,HSPE1,JUN,ME2,MYC,NFKB2,STIP1	835 (21)
niacinamide		chemical - endogenous mammalian		-0.487		0.00119	BAX,CAMP,CD14,CD40,CDKN1A,H2AFZ,ICAM1,ITGAM,JUNB,MMP9,MYC,PARP1,TP53	658 (17)
3-nitropropionic acid		chemical toxicant		1.471		0.00119	ATP5PF,ATP6V1B2,ATP6V1C1,BAX,COX6A1,COX6B1,GPI,JUN,MMP9,MYC,NPM1,TP53,TPI1	865 (23)
sodium arsenite		chemical drug		1.513		0.00119	AHCY,BAX,BIRC5,CDKN1A,EGR1,GADD45A,HSPA4,JUN,LITAF,MAT2A,RAF1,SRSF3,TP53	497 (18)
CXCL8		cytokine		-1.449	bias	0.00121	ANXA1,BAX,CD44,CD74,CXCR2,FAS,ICAM1,IFRD1,IL1B,ITGA1,ITGAL,ITGAM,ITGB2,LGALS3,MMP9,PRTN3,VCAM1	636 (16)
O6-benzylguanine		chemical drug		-0.47		0.00122	CCNB1,CCNB2,CDKN1A,FAS,H2AFX	705 (20)
DAB2IP		other		0.389	bias	0.00122	CD44,CDKN1A,EGR1,MYC,VIM	426 (16)
miR-125b-2-3p (and other miRNAs w/seed CAAGUCA)		mature microRNA		-1.308	bias	0.00122	AP2M1,API5,BAX,MMP9,TP53
Igkv1-117		other				0.00122	CDKN1A,JUN,JUNB,MYC,RELB	376 (14)
tiron		chemical reagent		-1.342	bias	0.00122	CDKN1A,DUSP1,HSPA5,PLAUR,PRDX2	639 (19)
SP600125		chemical - kinase inhibitor		0.179		0.00124	ACAT2,ALOX5,ATF3,BAX,BTG2,Ccl2,CCNB1,Cd24a,CD44,CDKN1A,Ceacam10,CHST12,CKAP4,COX7A2,CSF1R,DUSP1,EGR1,EIF1AX,EMB,FABP5,FAS,FN1,FUNDC1,GADD45A,GNS,H2AFX,HIST1H2BI,HIST2H2AA3/HIST2H2AA4,ICAM1,IL1B,INHBA,JUN,JUNB,LAPTM5,MAFB,MMP9,NUPR1,PARP1,PLSCR1,PRDX1,SMPDL3A,THBS1,TP53,VCAM1	610 (15)
Ubiquitin		group		-1.912		0.00128	CDKN2D,FAM89B,HSP90AA1,HSP90B1,HSPA4,HSPA5,HSPA9,HSPD1,RARA	886 (14)
CASP3		peptidase		-0.453		0.00128	BAX,BIRC5,CAPN1,CAPN2,CDKN1A,EIF2A,IL16,MMP9,TP53	661 (21)
H2AFZ	0.654	other				0.00128	AGPAT2,CDKN1A,CXCR4,GINS2,HPSE,MCM2,MCM7,RPS6,TOMM40	176 (7)
aldesleukin		biologic drug	Activated	2.891	bias	0.00128	B2M,CALR,CANX,EIF5A,HLA-G,IFI30,IFI35,NUP62,PDIA3,PSMB6,PSMB9,RFTN1
eplerenone		chemical drug		-0.198	bias	0.00128	Ccl2,CD68,CYBB,FN1,ICAM1,IL1B,NCF1,NFKB1,VCAM1	498 (13)
sunitinib		chemical drug		0.415	bias	0.0013	BIRC5,CCND3,CD44,CDKN1A,CTNNA1,ECM1,FN1,ICAM1,ITGA1,ITGAL,ITGB1,ITGB2,MMP9,TGFBI	504 (19)
TNFRSF8		transmembrane receptor		-1.098		0.0013	AHNAK,CASP1,CDKN1A,CTSC,CXCR4,FAS,IFI16,JUNB,MRTO4,MYC,NFKB2,NKG7,RELB,RPL7A	518 (15)
TFAP2A		transcription regulator		-1.249		0.00131	ANXA1,BAX,BIRC5,CDKN1A,G3BP2,GLO1,KLF4,LIPA,Ly6a (includes others),MCM5,MMP9,PLAUR,PRDX1,PSAP,RPL6,RPL7,RPLP0,RPS5,SESN1,STX7	740 (17)
GATA1		transcription regulator	Inhibited	-2.812		0.00133	ALOX5,BIRC5,BLVRB,BTG2,CALR,CCND3,CCR1,CDK4,CDKN2D,COPS5,CREG1,CYBB,EGR1,F10,HHEX,HPSE,HSPA9,IL6R,IPO5,IRF8,JUNB,LMO4,MCM3,MCM5,MGST2,MYC,NFKB1,NHP2,PBXIP1,PCNA,PSMG4,RANBP1,REL,RFC3,RPL22,RPL27A,RPS11,RRM1,SLC3A2,SLC50A1,SRM,TOP2A,Tpm1,UHRF1	517 (13)
NFYB		transcription regulator				0.00134	ATP5F1B,CCNB1,CCNB2,CDCA8,CDS2,CLDN15,CSDE1,CYTIP,EIF3C,EMC6,FAS,GADD45A,HLA-DQB1,ITM2C,METTL9,MSRA,NOSIP,OAT,PCNA,PDIA4,PIH1D1,PLK1,PSMB7,PSMC6,PTTG1,RFC3,RNPS1,RPL41,S100A4,SCARB1,SERBP1,SESN1,TAX1BP3,TBC1D22A,TMBIM6,TOP2A,TSNAX,TXNDC12,UHRF1,VIM,ZMPSTE24
CCR5		G-protein coupled receptor		1.084	bias	0.00134	BAX,BID,CASP8,Ccl2,CD9,FAS,IL1B,MMP9,SLPI,TNFRSF1A,TNFRSF1B	682 (17)
ETV5		transcription regulator		1.463		0.00136	AHNAK,BAX,CLDN1,CTNNA1,CXCR4,DPYSL2,FN1,HOPX,ICAM1,ITGB1,LCN2,LGALS3,MID1IP1,RAB27A,S100A6,SAMHD1,SCARB1,SOAT1,TINAGL1
ITGB3		transmembrane receptor		-1.44		0.00136	APLP2,CD40,CEACAM1,FN1,HSP90B1,IL1B,LAPTM4A,LIMS1,MMP9,NDUFV1,OSM,PCNA,PLAUR,SDHC,VPS72	644 (16)
GNAQ		enzyme				0.00136	ANXA3,Arf2,ATF3,BTG2,Ccl2,CD44,CTSV,EGR1,GADD45A,IL1RN,INSIG1,MGST1,MYC,NEU1,OAS1,PLAUR,PLSCR1,PRKCD,PYGL,SELENBP1,Ugt1a7c,ZFP36L1	543 (17)
cholecalciferol		chemical - endogenous mammalian		-1.111	bias	0.00136	Acp5,ALOX5,ANKRD22,BIRC5,CAMP,CD14,CD40,CEBPD,F13A1,GAS7,ITGAM,ITGB2,JUN,LY75,MS4A6A,PLD4,PRKX,PRTN3,RARA,SULF2,TREML2,UBE2E1	778 (22)
carbon tetrachloride		chemical toxicant		0.923	bias	0.00139	ASS1,ATF3,BAX,BCKDHA,Calm1 (includes others),CAT,Ccl2,CCR1,CDKN1A,DUSP1,FKBP1A,FN1,GADD45A,GLUD1,GSTP1,HSP90AA1,HSPD1,ICAM1,IL13RA1,IL1B,ITGB1,JUN,JUNB,MGLL,MMP9,Mt1,MYC,PCNA,PPP1R15A,QDPR,S100A6,SORD,TF,VCAM1	750 (19)
IL27		cytokine		1.233	bias	0.0014	B2M,CCND3,CD14,CD63,CD74,CDK4,CEBPD,EGR1,HLA-A,HLA-DMA,HLA-DMB,HLA-DQA1,HLA-DQB1,HLA-E,ICAM1,IL18BP,IL1B,IL1RN,ITGAM,MYC,OAS1,TNFSF13,TNFSF13B,VCAM1,VIM	537 (16)
E2F5		transcription regulator				0.0015	AURKB,BAX,CASP6,CDKN1A,MYC,PA2G4,PCNA,RANBP1
UCN-01		chemical drug		1.264	bias	0.0015	CCND3,CDK4,CDKN1A,ERCC1,IL1B,PLK1,RAF1,TP53	716 (22)
SIM1		transcription regulator	Activated	3.087	bias	0.00151	AKR1B1,CCR1,CCS,Cd52,EGR1,EIF5A,FKBP3,GPX3,GTF3A,HLA-A,ICAM1,IFI16,IL6R,LCP1,LRRFIP1,LTF,MCM7,MRPL37,NACA,NDUFA1,NUDC,PDLIM4,PEA15,PFN1,POLD4,RGS10,Rpl29 (includes others),SELENBP1,SNX5,Tnfsf9,TSC22D3,TYK2,UBA1,ZFP36L1
gemcitabine		chemical drug		0.494	bias	0.00153	BIRC5,Ccl2,CCNB1,CDKN1A,CXCR4,DCK,FAS,IL1B,MYC,PEBP1,PKM,RIPK3,SLC29A1,TP53	770 (18)
4-hydroxytamoxifen		chemical drug		-0.558	bias	0.00153	ATF3,BAX,C3,CD55,CDKN1A,CEBPD,CNBP,CTSD,DUSP1,EGR1,EIF5A,GLRX,GM2A,HEBP1,IER2,JUN,JUNB,MAP2K1,MYC,OGT,PDCD5,POLD4,PPP1R15A,PTTG1,RARA,RPS6KA4,S100A9,SLC25A4,TMEM97,TP53	712 (17)
fluoride		chemical - endogenous mammalian		0	bias	0.00161	BAX,FAS,GADD45A,HSPA5,VCAM1,XBP1
CLCN5		ion channel		-0.555	bias	0.00161	B2M,Ccl2,CTSB,PCNA,SOD1,TXN
TBX2		transcription regulator	Activated	2.688		0.00161	ASF1B,ATF3,AURKA,AURKB,CCNA2,CCNB1,CDCA3,CDKN1A,CDT1,CKS1B,MCM2,MCM5,MCM6,MCM7,PLK1,TIPIN	604 (12)
SREBF2		transcription regulator	Activated	2.638	bias	0.00161	ACAA2,ACSL1,CDKN1A,CYP4F2,DBI,EBP,FABP5,FDPS,IDH1,INSIG1,LIPA,MVD,NLRP3,SQLE,TIFA,TMEM97	822 (19)
11,12-epoxyeicosatrienoic acid		chemical - endogenous mammalian		-0.973		0.00164	CD44,CD82,DUSP1,ICAM1,MMP9,NME1,VCAM1	723 (20)
CYP2E1		enzyme		-0.524	bias	0.00164	C3AR1,C5AR1,CAT,Ccl2,CD14,MGST1,NCF1	403 (11)
AURKB	0.461	kinase		0	bias	0.00164	ATF3,BAX,CCNA2,CD82,CDKN1A,MCM3,RFC3	841 (19)
DDX5		enzyme		1.036	bias	0.00164	BAX,CDKN1A,JUN,LCN2,MYC,S100A4,TP53	728 (17)
NPC1		transporter		1.698	bias	0.00165	CD68,CTSB,CTSD,CYP27A1,GUSB,LGALS3,LIPA,MMP8,NPC2,S100A8,XBP1	830 (13)
AGT		growth factor	Activated	2.486	bias	0.00166	ACAT2,ADIPOR1,ADORA2B,ANXA1,ANXA3,ATF3,ATP1A1,ATP2B1,BAX,Calm1 (includes others),CALR,CASP8,CAT,Ccl2,CCND3,CD44,CDK4,CDKN1A,COX4I1,COX5A,Cox5b,Cox6c,COX7A2,Cox7c,CTSS,CYBB,DUSP1,EBP,EDNRA,EGR1,FCGR1A,FN1,GSTM5,GSTP1,HSPA1A/HSPA1B,Hspa1b,ICAM1,IDH1,IL1B,ITGB1,ITGB7,JUN,LIMD2,MGST1,MIF,MMP9,MSR1,MYC,NCF1,NFKB2,PARP1,PFN1,Ppp2r5c,RIPK3,SCARB1,SPTSSA,TNFRSF1B,TP53,TXNIP,UCP2,VCAM1,ZEB2	724 (18)
EIF2AK4		kinase		1.915	bias	0.00166	ATF3,ATG3,CAT,CCND3,EGR1,IL1B,PHGDH,PPP1R15A,PSAT1	301 (11)
thioacetamide		chemical toxicant		1.625	bias	0.00166	ANXA1,ANXA4,ARG2,CD14,Cd24a,CD44,CD55,CKB,EMP1,EMP3,GATM,GPX3,HAT1,HSPA4,IFITM2,IL1B,JUN,LCN2,LGALS1,LGALS3,LGALS3BP,LXN,MCM3,MCM6,Ms4a6b,MYC,PKM,PROM1,PSMB10,PSMB8,RBM3,RGCC,RRM1,S100A10,SCPEP1,STEAP3,TMEM173,Tpm1	551 (10)
PRKCD	0.287	kinase		-1.026	bias	0.00167	BIRC5,Ccl2,CCNA2,CD68,CDKN1A,CTSB,DENND3,ICAM1,IL1B,IL1RN,ITGAM,JUN,JUNB,LAMP1,LYST,MAP1LC3B,MMP9,MRPS11,MYC,NFKB2,OAS1,PDCD4,PDLIM7,PLSCR1,PPP1R15A,PPP1R3D,PROM1,RELB,TP53,TUBB2A,VCAM1	588 (15)
F7		peptidase		-0.639	bias	0.0017	CLDN1,EEF1A1,EEF2,EGR1,GADD45A,IER2,IL1B,MYC,PLAUR,RND3	670 (16)
CUL4B		other	Inhibited	-3	bias	0.0017	EIF3I,GLO1,HSPA9,NME1,PRDX3,PSMA1,RNASEH1,SOD1,TPI1,UBXN1
CEBPD	-0.788	transcription regulator		-1.983	bias	0.00175	BIRC5,C3,Ccl2,CCNB1,CCNB2,CD14,CEBPD,CSF1R,CSF3R,CTSV,CXCR4,HP,IL1B,ITGAM,MMP8,MYC,PRTN3,TP53,XBP1	759 (24)
DUSP1	-0.979	phosphatase		1.446		0.0018	CAMP,Ccl2,CD40,CFB,CLEC10A,CYBB,DUSP1,ICAM1,IL1B,IL1RN,JUN,LTF,MGLL,MXD1,Ngp,NRP1,OSM,PLAUR,RETSAT,S100A9,VCAM1	416 (17)
ERK1/2		group		-0.836	bias	0.00181	ALOX5,APH1A,ASAH1,B2M,BAX,C3,CALR,CAT,Ccl2,CD40,CD44,CDK4,CDKN1A,CTSB,CTSV,CXCR4,CYBB,DUSP1,ECE1,EGR1,ENO1,FN1,HLA-A,HSPA5,ICAM1,IL1B,JUN,JUNB,KLF13,MAP4K1,MMP9,MYC,PCNA,PKM,PLAUR,POLB,PSMB10,PSMB6,PSMB8,PSMB9,S100A6,SOD1,TREM1,VCAM1,VCAN	909 (20)
PRKAA1		kinase		0.989	bias	0.0019	ACOT7,ARHGDIB,ATF3,BAX,BIRC5,BTG1,CAT,CD302,CDKN1A,COX4I1,FN1,GPX1,LITAF,LMO4,Ly6a (includes others),MGST1,MMP9,NCF1,OAT,PSMB8,RND3,SORL1,TP53,VCAM1,ZFP36L1	560 (20)
CpG oligonucleotide		chemical drug		0.592	bias	0.0019	BAX,BIRC5,Ccl9,CCR1,CD14,CD40,CD63,CLEC4E,EGR1,FAS,FCGRT,ICAM1,IL1B,M6PR,MSR1,MYC,PCNA,PRKCD,RASSF4,SLC40A1,THBS1,TNFRSF13B,TNFSF13,TNFSF13B,VASP	534 (16)
NFKB1	0.282	transcription regulator		1.487	bias	0.00191	AKR1B1,B2M,BAX,BTG2,Ccl2,CD40,CD82,CDKN1A,CFB,CTSB,CYBB,DUSP1,EBI3,EGR1,FAS,FCGRT,GADD45A,HLA-DMB,ICAM1,IKBKB,IL1B,IL1RN,LGALS1,LTB,MAT2A,MMP9,MSR1,Mx1,MYC,NFKB1,NFKB2,NFKBIB,POLB,PRKCD,PXN,RELB,SLC25A4,SYTL1,TK1,TP53,VCAM1	761 (18)
miR-1-3p (and other miRNAs w/seed GGAAUGU)		mature microRNA	Inhibited	-3.507	bias	0.00198	ABHD11,ADPGK,ARCN1,ARF4,ATP6V1B2,Calm1 (includes others),CAP1,CORO1C,CTSC,DHX15,GOLGA7,H3F3A/H3F3B,LASP1,NRP1,OAT,PDCD4,PDLIM7,PGM2,PLEKHB2,PNP,PPIB,PTBP1,SSNA1,SYNE1,TAGLN2,THBS1,Tmsb4x (includes others),TRAPPC3,UHRF1,UNC93B1,YWHAQ
CCNE1		transcription regulator	Activated	2.804	bias	0.00199	CAPN2,CCNA2,CCNB1,CD44,CDKN1A,MCM2,PCNA,TP53	767 (20)
RAC2	-0.971	enzyme				0.00202	ANXA1,CAP1,Cd24a,CD74,IL1B,MIF,NFKB1,PKM,S100A6,SLPI,TKT	271 (9)
CRP		other		0.781	bias	0.00202	Ccl2,CD40,EGR1,IL1RN,IL6R,ITGAM,PSMA7,PSMB7,PSMB9,PSMC6,PSME2	480 (13)
CUX1		transcription regulator		1		0.00202	ARHGDIB,CCNA2,CDKN1A,CEBPE,CYBB,ITGB2,LTF,MMP8,MYC,NCAM1,RACGAP1,THBS1,VIM	282 (7)
Pln		other				0.00202	ATP1A1,ATP2B1,CALU,ENO1,HSP90B1,ITGB1,PGK1,RAB5B,RAP1A,SOD1,TPI1,VCP,VIM
quercetin		chemical drug		0.59		0.00204	ACAA2,BAX,BIRC5,Ccl2,CD63,COMT,EGR1,FBL,HPSE,HSPA5,ICAM1,ITGAL,JUN,LCN2,MMP9,MYC,PLAUR,PON2,PRDX3,PRDX5,SOD1,Tnfsf9,TP53,VCAM1	727 (18)
troglitazone		chemical drug		1.388		0.00206	ACSL1,ADIPOR1,ARF4,ATF3,ATP2B1,BAX,BCKDHA,BIRC5,C3,Ccl2,CCNB1,CCND3,CDK4,CDKN1A,CEBPD,CFL1,DBI,DGAT1,DHRS3,EGR1,FABP5,FN1,G0S2,GADD45A,GLO1,HP,HSPA5,ICAM1,IFI16,IFRD1,IL1B,JUN,KLF4,MMP9,MSR1,MYC,NAGK,NCAPH,NCF1,NFKB1,NFS1,PCNA,PNRC2,RACGAP1,RGS10,SCARB1,TALDO1,TP53,TSN,TWF2,UCK1,UCP2,VCAM1	773 (22)
L-serine		chemical - endogenous mammalian		-1.188		0.00207	CDKN1A,PCNA,PHGDH,PSAT1,TP53	321 (12)
MXD1	-2.092	transcription regulator		-0.927	bias	0.00207	BCL6,EIF4A1,EIF4E,ITGA1,MXD1	620 (7)
clioquinol		chemical drug		1		0.00207	CDKN1A,HDAC1,JUN,KDM6B,TP53	929 (23)
CA074-methyl ester		chemical reagent		1.133		0.00207	CTSB,IL1B,LAMP1,LAMP2,NLRP3	576 (7)
tyrphostin AG 1296		chemical - kinase inhibitor		-1.231	bias	0.00207	Ccl2,CD14,ICAM1,ITGAM,JUN	629 (20)
adaphostin		chemical drug		1.513	bias	0.00207	CCND3,CDK4,CDKN1A,RAF1,TP53	708 (24)
S100A4	0.745	other		0.881	bias	0.00211	BAX,Ccl9,CDKN1A,CLIC4,FN1,MMP9,THBS1,TP53,VCAM1,VIM	658 (17)
napabucasin		chemical drug	Inhibited	-2.168	bias	0.00211	B2M,BIRC5,CD44,ETFA,HDAC1,HPRT1,IKBKB,ITGB1,KLF4,LIN28A,MYC,NFKB1,PLAUR,RPLP0
mycophenolic acid		chemical drug		-0.791	bias	0.00211	ATF3,CCND3,CD55,CD63,CDKN1A,CLDN1,CXCR4,CYBB,DUSP1,FN1,HDAC3,HSPA5,IL1B,INHBA,MYL12A,NFKB2,PCNA	875 (23)
5-N-ethylcarboxamido adenosine		chemical reagent		-0.244		0.00212	ADORA2B,ARG2,BTG2,Ccl2,CEBPD,DAD1,EGR1,EIF2B2,GADD45A,HLA-DQA1,HLA-DQB1,IER2,IL1B,INHBA,JUNB,NRP1,NT5E,THBS1,TXNIP,VCAN	545 (16)
grape seed extract		chemical drug		-0.784	bias	0.00212	CCNB1,CDKN1A,CKB,ENO1,HSPA8,HSPD1,MYC,PCNA,VIM	325 (10)
KEAP1	0.321	transcription regulator		-1.463		0.00212	Acp5,GBE1,GSTP1,IL1B,MAP1LC3B,MMP9,PRDX1,TOP2A,VCAM1	693 (16)
ICMT		enzyme				0.00212	ATP5F1B,Ccl2,CDKN1A,GDI1,GNGT2,LMNA,REEP5,SERINC1,TGFBI	228 (7)
PCM1		other		0	bias	0.00215	CDKN1A,MCM3,PCNA,TP53
ASCL2		transcription regulator				0.00215	CCNB1,CTSD,CXCR4,EGR1
PDE6B		enzyme				0.00215	CAT,GPX1,RIPK3,SOD1
P2RY4		G-protein coupled receptor		-1	bias	0.00215	ICAM1,MMP8,MMP9,VCAM1	339 (9)
TSPO	0.642	transmembrane receptor		0	bias	0.00215	ICAM1,TSPO,VCAM1,VDAC1	318 (7)
RBCK1	0.391	transcription regulator		1	bias	0.00215	CCNB1,ICAM1,MYC,VCAM1	589 (11)
N-methyl mesoporphyrin IX		chemical reagent		-0.762	bias	0.00215	CCNB1,CDK4,LIN28A,MYC	183 (4)
nicorandil		chemical drug		0.254	bias	0.00215	ATF3,BAX,JUN,NCF1	335 (11)
4-coumaric acid		chemical - endogenous mammalian				0.00215	CCNA2,CCNB1,CDKN1A,MYC	286 (7)
vinpocetine		chemical drug		0.339	bias	0.00215	Ccl2,ICAM1,IL1B,VCAM1	334 (9)
CG		complex		1.509	bias	0.00223	ACSL1,B2M,BAX,BTG1,BTG2,Ccl2,CCND3,CDK4,CDKN1A,CEBPD,CNPY4,CTSV,CXCR4,DBI,DUSP1,EGR1,EIF4E,EMB,EMP1,FABP5,FAS,FGL2,G0S2,GM2A,HLA-A,HLA-DQA1,HPSE,HSD11B1,ICAM1,IL1B,IL1R2,INHBA,ITGA1,ITGB1,JUN,KHK,KLF4,LGALS3BP,MMP9,NFKBIB,NR1H2,NRP1,PCNA,PLAUR,S100A10,S100A6,SCARB1,SUMO1,TIPIN,TP53,VCAN	756 (18)
BRD2		kinase				0.00225	Ccl2,DYNLT1,IL1B,LY9,MYC,P4HB,PPA1,PRELID1,RPN1,S100A6,SH2D3C,TARS	635 (7)
Aldose Reductase		group		1.348	bias	0.00227	CDK4,ICAM1,IL1B,ITGAM,MSR1,MYC,PCNA	521 (17)
DOT1L		phosphatase				0.00227	PABPC1,PPIA,RPL19,RPL41,RPLP0,RPS2,RPS23
NLRC5		transcription regulator		1.517	bias	0.00227	B2M,CD40,HLA-A,HLA-E,HLA-G,IL1B,PSMB9	457 (14)
2-mercaptoacetate		chemical - endogenous non-mammalian		0	bias	0.00227	CD68,ENO1,ICAM1,IL1B,S100A10,TPT1,TREML2
linalool		chemical - endogenous non-mammalian				0.00227	ACSL1,ECHS1,HSD3B7,SLC27A4,SOD1,SQLE,UCP2
LIPE		enzyme	Inhibited	-2.177		0.00235	ACSL1,ATF3,BCL6,CASP8,CD74,EGR1,G0S2,H3F3A/H3F3B,HLA-DQA1,HSPA1A/HSPA1B,MSR1,NFKBIB,PDHA1,PRDX2,RARA,SCARB1,SCARB2,ST3GAL5,SUCLA2,TKT,TWF2,YWHAG	233 (7)
epothilone B		chemical drug		-1.664		0.00238	BTG2,BUB3,CDKN1A,FAS,THBS1,TOP2A	502 (7)
Srebp		group		0.682	bias	0.00238	ACSL1,CDKN1A,CYP4F2,IDH1,PGD,UCP2
GC-GCR dimer		complex	Inhibited	-2.425	bias	0.00238	ANXA1,DUSP1,IL1R2,IL1RN,SLPI,TSC22D3
CD24		other		0.524	bias	0.00238	ATF3,CDKN1A,ECM1,EMP3,FXR1,ICAM1,JUN,LAT2,MBNL1,MTUS1,NAGK,PPP1R15A,PRDX2,RAF1,RELB,THBS1,TOP2A,TP53,TRAFD1,UROD	592 (17)
EPHX2		enzyme		1.039		0.00238	Ccl2,HSPA5,ICAM1,IL1B,VCAM1,XBP1	524 (19)
CXCL2		cytokine		0.248	bias	0.00238	Ccl2,CXCR2,ICAM1,IFRD1,IL1B,ITGAM	341 (11)
DDX17		enzyme		-0.323	bias	0.00238	CDKN1A,CTSD,JUN,LCN2,MYC,S100A4	685 (13)
S1PR3		G-protein coupled receptor		0.686	bias	0.00238	Ccl2,CD44,ICAM1,IL1B,JUN,VCAM1	405 (15)
homocysteine		chemical - endogenous mammalian		1.482	bias	0.0024	ATF3,BAX,Ccl2,CDKN1A,EEF1A1,EEF1D,FDPS,GADD45A,HSPA5,IL1B,ITGAM,PKM,PRDX1,PRDX2,TP53,VCAM1,XBP1	709 (21)
lipid A		chemical toxicant		0.143	bias	0.00245	C3,Ccl2,CD14,CD40,FCGR1A,IL1B,M6PR,MSR1,PRKCD,THBS1,VASP	450 (15)
ZMPSTE24	-0.75	peptidase				0.00245	ATF3,BTG2,Ccl6,CDKN1A,CTSV,CXCR2,GADD45A,ICAM1,LMNA,SESN1,SIRPA	547 (16)
GnRH-A		chemical reagent		0.291		0.00248	ANXA5,ATF3,BTG2,CD68,CDKN1A,EGR1,HADH,IER2,JUN,JUNB,KLF4,PPIE,PPP1R15A,TARBP2,TMBIM1	615 (18)
MAPK14		kinase		-0.619	bias	0.00256	ATP5MF,BAX,CALR,CAT,Ccl2,CCNA2,CCNB1,CD40,CEBPD,DUSP1,FAS,FDPS,FN1,GADD45A,ICAM1,IL1B,JUN,JUNB,MMP9,NRP1,PLAUR,PRDX1,Slfn1,SLFN12L,Slfn2,SOD1,TOP2A,TP53,Tpm1,VCAM1	689 (19)
CTSS	2.484	peptidase		-0.128	bias	0.00259	BID,CASP8,CTSV,FAS,IL1B,ITGB1,MMP9,PRKCD	329 (12)
ECSIT	0.285	transcription regulator		-0.745	bias	0.00259	CD44,IL1B,IL1RN,JUNB,NFKB1,NFKB2,PLAUR,RELB	374 (13)
CCR1	-1.229	G-protein coupled receptor		1.255	bias	0.00259	Acp5,Ccl2,CCR1,CTSS,CTSV,ITGAM,MMP9,VIM	533 (15)
diallyl disulfide		chemical - endogenous non-mammalian		-0.13	bias	0.00259	ATF3,BID,CCNB1,CD55,GSTM5,NT5E,PCNA,TP53
hydroxypropyl-beta-cyclodextrin		chemical drug		-0.563	bias	0.00259	CD68,CTSB,CTSD,GUSB,IL1B,LIPA,NPC2,SCARB1	319 (9)
TNFSF13	0.47	cytokine		-1	bias	0.00261	BAX,BCL6,CDK4,MCM2,MCM5,MCM6,MYC,PCNA,TP53,XBP1	744 (21)
JAG2		growth factor		0.711	bias	0.00261	AIMP1,BCL6,C3,CCR1,IL10RA,IL13RA1,IL1B,IL1RN,LTB4R,MIF
miR-146a-5p (and other miRNAs w/seed GAGAACU)		mature microRNA		-1.571	bias	0.00263	BLMH,CAMP,CAT,CCNA2,CD40,CDKN3,CFH,CXCR4,IL36G,IRF5,KIF22,LTB,LTF,MTA2,PA2G4,PGLYRP1,TRIM14,UHRF1	714 (17)
8-bromoguanosine 3',5'-cyclic monophosphate		chemical - kinase inhibitor		0.728		0.00268	CDKN1A,HINT1,ITGAM,JUNB,MMP9,PLAUR,S100A10,TP53,VCAM1	525 (18)
Cdk		group		-0.854	bias	0.00268	ATP5MC1,COX5A,DUSP1,GADD45A,IDH3A,MYC,SDHA,TXNIP,UCP2	309 (8)
HLX		transcription regulator		0.351	bias	0.00268	CCNB1,Cd24a,CD44,CLDN1,CTSS,EGR1,ICAM1,JUN,MYC
imipramine blue		chemical drug	Inhibited	-2.945	bias	0.00268	AURKA,CCNA2,CCNB1,CDK4,CENPA,GADD45A,PCNA,PLK1,STMN1	279 (7)
ciglitazone		chemical drug		1.018		0.00281	BAX,CAT,Ccl2,CDKN1A,CYBB,FN1,GSN,ICAM1,JUN,LCN2,MMP9,MXD1,NFKBIB,PARP1,SOD1,VCAM1	787 (19)
PIK3CA		kinase		-0.095		0.00286	ATP1A1,BIRC5,Ccl2,CCNB1,CD14,Cd24a,CD44,CEBPD,CSE1L,HSP90AB1,ITGAM,ITGB1,TK1,VIM	409 (14)
Y 27632		chemical drug		0.18		0.00286	ACTG1,Ccl2,CD44,CDK4,CDKN1A,DPYSL2,ICAM1,MMP9,MYC,THBS1,TP53,Tpm1,VCAM1,VIM	431 (17)
NFkB (complex)		complex		1.372	bias	0.00291	ADORA2B,ALDH1B1,ATF3,BATF,BAX,BID,BIRC5,BLVRA,C3,CAMP,CASP8,Ccl2,CCNB1,CCNB2,CCR2,Cd24a,CD40,CD44,CD74,CD82,CDKN1A,CEBPD,CFB,CLEC4E,CXCR4,Cyb5r3,CYBB,DAD1,EGR1,FABP5,FAS,FCGR1A,FN1,FPR2,G0S2,GADD45A,HLA-A,HLA-DMB,HSPA9,ICAM1,IFNAR2,IL10RA,IL1B,IL1RN,ITGAL,ITGAM,ITGB1,JUN,JUNB,KDM6B,LAMP2,LCN2,LITAF,LTB,MMP9,MYC,NCAM1,NFKB1,NFKB2,NLRP12,NUP62,PEA15,PLK1,PPIF,PRKCD,PSMB9,PXN,REL,RELB,RFTN1,SCFD1,SL…	748 (18)
PROC		peptidase		0.831		0.00295	CALR,Ccl2,F5,ICAM1,IL1B,MMP9,NFKB2,PCNA,THBS1,TP53,VCAM1	450 (13)
uric acid		chemical - endogenous mammalian	Inhibited	-2.604		0.00296	ANXA1,Ccl2,CDCA8,H2AFX,ICAM1,IL1B,KHK,MAPK13,NFKB2,PARP1,PARP2,POLB,PTTG1,RELB,RFC3,TP53,TREM1,UBE2N	627 (15)
PPIF	0.332	enzyme		-0.943		0.00296	Ccl2,Ccl6,Ccl9,CCR1,CCR2,CCRL2,CMTM6,CX3CR1,CXCR2,CXCR4,Gpr137b-ps,HIST1H2BI,Ifi202b,IL16,IRF5,MCM6,Rpl29 (includes others),TIPIN	303 (7)
ORMDL3		other		-0.618	bias	0.00306	ADAM8,CD48,MAP1LC3B,MMP9,OAS1,OAS3,TNFSF13B
probucol		chemical drug		-1.664		0.00306	CYBB,PSMA1,PSMA2,PSMA3,PSMA4,TP53,VCAM1	568 (18)
teniposide		chemical drug				0.00307	CDKN1A,FAS,TP53	695 (12)
repertaxin		chemical drug				0.00307	IL1B,ITGAM,MMP9
MCU	-0.506	ion channel				0.00307	ATP5F1A,NDUFA9,UQCRC2
NPSR1		G-protein coupled receptor				0.00307	GADD45A,MYC,NFKB1
GNL3L		other				0.00307	BAX,CDKN1A,YWHAB	387 (12)
Nc2		complex				0.00307	EIF4E,HLA-A,MYC
LARP1		translation regulator				0.00307	PABPC1,RPS20,RPS6
LETMD1		other				0.00307	BAX,CDKN1A,TP53
CDC20	0.59	other				0.00307	CCNB1,CDK4,UBE2C	548 (12)
CFL1	0.366	other				0.00307	DSTN,ICAM1,JUN	509 (12)
tirapazamine		chemical drug				0.00307	CDKN1A,RPA1,TP53
bilobalide		chemical - endogenous non-mammalian				0.00307	BAX,MYC,TP53	335 (12)
GW501516		chemical drug		-0.707	bias	0.00316	ACAA2,ACADL,ACSL1,CAMP,CAT,CDKN1A,HADHA,Ifi202b,IL1B,IL36G,LTF,Orm1 (includes others),S100A8,S100A9,SLPI,SOD1,THBS1,TP53,UCP2	609 (21)
ANXA1	-2.297	enzyme		-0.257		0.00319	ANXA1,ANXA4,CXCR4,FARSA,FPR2,IL1B,ITGAM,ITGB2,TIFA,TSC22D3	494 (15)
ABL1		kinase		0.31	bias	0.00319	C3,CCNA2,CDKN1A,CTSB,DOK1,FAS,GADD45A,MYC,NME1,TP53	809 (22)
clobetasol propionate		chemical drug		-1.387	bias	0.00327	CD40,FABP5,FAS,ICAM1,LY75	650 (10)
PRAME		other		-0.254		0.00327	CD40,CDKN1A,IL13RA1,S100A4,TOP2A
CLCA2		ion channel		0.063		0.00327	CASP8,CDKN1A,FN1,TP53,VIM
BAP1		peptidase		-1.974	bias	0.00327	ATF3,Ccl2,HSPA5,MCM3,XBP1
azetidyl-2-carboxylic acid		chemical reagent	Activated	2.213	bias	0.00327	HSP90B1,HSPA1A/HSPA1B,HSPA5,HSPA8,HSPA9
cytochalasin B		chemical toxicant		-0.152		0.00327	BIRC5,CD63,CDKN1A,MMP9,PTTG1	536 (18)
MDM2		transcription regulator		-0.979		0.00328	ATF3,BAX,BIRC5,CCNA2,CDK4,CDKN1A,FCGRT,HIST2H2AA3/HIST2H2AA4,IL1RN,NDUFA1,RABAC1,RPL23,THBS1,TOP2A,TP53	699 (21)
LCN2	-3.787	transporter	Activated	2.236	bias	0.00328	ACTL6A,BAX,CAPG,Ccl2,CORO1C,IL1B,IL1RN,IVNS1ABP,KIF23,NDE1,NR1H2,RARA,TAGLN2,TINAGL1,VIM	609 (14)
AHR		ligand-dependent nuclear receptor		0.63		0.00328	ACTL6A,AKR1A1,ALDH1B1,ALDH2,ALOX5,ARG2,ATP2B1,BAX,BTG2,CASP8,CCNA2,CCNB1,CCND3,CD14,CDK4,CDKN1A,CDKN2D,COX8A,CTSD,EGLN2,EMILIN2,ENO1,FAS,FN1,GADD45A,GHITM,Gm21596/Hmgb1,GSTM5,HP,HSP90AA1,HSPA5,IL1B,ITGAM,JUN,JUNB,LYST,Mt1,MYC,PLK1,POMP,PPP1R15A,SLC16A10,SOD1,TGFBI,THBS1,TK1,TP53,TUBA8,TXN,VIM	745 (18)
phenylbutazone		chemical drug		1.974	bias	0.00328	ANXA1,CD44,LCN2,LGALS3,LXN,MCM3,Ms4a6b,PSMB8,RBM3,S100A10,TMEM173,TUBB,VIM
silibinin		chemical drug		-0.126	bias	0.00331	BAX,BIRC5,CCNB1,CD44,CDK4,CDKN1A,EGR1,FN1,MMP9,MYC,PCNA,PLAUR,TP53,VIM	642 (18)
2-deoxyglucose		chemical drug		0.58		0.00331	BID,CASP8,CDKN1A,CSF1R,GPX1,HSP90B1,HSPA5,IL1B,IRF8,JUN,MYC,PDIA3,TP53,TXNIP	572 (19)
phorbol 12,13-didecanoate		chemical toxicant		-0.42		0.00333	CDKN1A,CEBPE,CYCS,DUSP1,MAX,MYC,PARP1,PRKCD	873 (19)
sterol		chemical - endogenous mammalian	Inhibited	-2.4	bias	0.00333	ACSL1,DBI,EBP,FDPS,IDH1,IDH2,LIPA,SCARB1	593 (10)
ANXA2		other		0.252		0.00334	BAX,CDKN1A,FAS,GADD45A,JUN,MYC,S100A10,SESN1,TP53	408 (16)
histone deacetylase inhibitor		chemical drug		0.295		0.00334	BAX,CDKN1A,DEK,FAS,GSN,MYC,RAF1,TP53,TXNIP	740 (18)
green tea polyphenol		chemical drug		0.239		0.00334	ANXA1,BAX,CASP8,CDKN1A,ICAM1,IL1B,JUN,MMP9,TP53	654 (16)
NCAM1	-0.363	other		0.577	bias	0.00339	CALR,HSPA4,MALAT1,NCAM1,NFKBIB,THBS1
C5		other		-0.651	bias	0.00339	C5AR1,C5AR2,Ccl2,IL1B,ITGB1,ITGB2	555 (18)
nimesulide		chemical drug		0.447		0.00339	BIRC5,CAT,EDNRA,MMP9,NCF1,PCNA	761 (20)
NR1H3		ligand-dependent nuclear receptor		1.859		0.00344	ARG2,ATF3,CAT,Ccl2,FDPS,GPX1,GPX3,GSTM5,GSTP1,HSD11B1,IL1B,IL1RN,ITGAL,MID1IP1,MMP9,Mt1,PLTP,RARA,RPS14,SCARB1,SLC16A10	685 (21)
potassium chloride		chemical drug		0.788	bias	0.0035	ATF3,ATP1A1,ATP2B1,BTG2,CALR,CASP6,Ccl2,EGR1,HSP90B1,HSPA5,IL1B,JUN,MYC,PDIA3,PDIA4,TXNIP,XBP1	586 (20)
herbimycin		chemical - kinase inhibitor		0.943	bias	0.00353	CCND3,CDK4,CXCR2,CXCR4,DUSP1,ICAM1,IL1B,JUNB,MMP9,SIRPA,TNFRSF1A	473 (15)
MED1		transcription regulator	Activated	3.158	bias	0.00367	ACAA1,ANAPC5,AURKA,AURKB,BAX,BCL6,BIRC5,CCNB1,CDC20,CDK4,CDKN1A,CENPA,EDF1,FAM89B,GADD45A,GSTP1,HPRT1,HSD17B4,IRF8,KLF13,KLF4,MYC,PLK1,THBS1,TP53,XBP1	834 (22)
P38 MAPK		group		0.273	bias	0.00371	ANXA5,ARG2,ASS1,ATF3,BAX,BIRC5,Ccl2,CD40,CD44,CD55,CD82,CDKN1A,CEBPD,CXCR4,CYBB,DUSP1,EGR1,FAS,FN1,GDI1,HBP1,HP,HSPA5,ICAM1,IL1B,IL1RN,INHBA,ITGAM,ITGB2,JUN,JUNB,KDELR1,KLF13,KLF4,MIF,MMP9,MYC,NFKB1,PCNA,PLA2G7,PLAUR,RARA,RND3,THBS1,TNFRSF1A,TOP2A,TP53,TRADD,TREM1,TRIB1,VCAM1	537 (17)
DETA-NONOate		chemical reagent		-0.786		0.00373	CAT,CDKN1A,DUSP1,FAS,GLO1,ICAM1,MMP9,MYC,S100A8,TP53,TXNIP,VCAM1	589 (16)
PTPN11		phosphatase		-0.858		0.00375	BAX,BSG,CD14,CD68,CDKN1A,CSF1R,CSF3R,CYBB,EGR1,JUN,LTF,OLFM4,PLAUR,PRTN3,TP53	737 (20)
carbon monoxide		chemical - endogenous mammalian		-0.172		0.00382	BAX,CD14,CDKN1A,EGR1,FN1,ICAM1,IL1B,IRF8,ITGB1,NCF1,PLAUR,PRDX1,XBP1	454 (17)
romidepsin		biologic drug		-0.325		0.00382	BAX,CDKN1A,CDKN2D,DUSP1,EGR1,GSN,ICAM1,JUN,MMP9,MYC,PLAUR,RAF1,RAP1A,TP53	704 (21)
3,3'-diindolylmethane		chemical drug		-0.486		0.00382	ATF3,BAX,BIRC5,CASP8,CDK4,CDKN1A,FAS,HLA-A,IFNGR1,IL1B,MAP1LC3B,MTA2,PARP2,VIM	683 (17)
RNASEH2A	0.251	enzyme				0.00387	IFI16,Ifi27l2a/Ifi27l2b,IFI35,IFITM3,IFNAR1,IFNGR1,IRF5,NFKB1,NFKB2,OAS1
RCE1		peptidase				0.00387	ATP5F1B,B2M,Ccl2,CRIP1,GDI2,LMNA,MGST1,REEP5,SERINC1,TGFBI
dalfampridine		chemical drug		0	bias	0.00387	ATF3,BTG2,DUSP1,EGR1,HSPA8,IER2,JUN,JUNB,KLF4,SNORD22	549 (15)
H-7		chemical - kinase inhibitor		0.306	bias	0.00387	ECE1,EGR1,FAS,FN1,HDC,ITGB1,JUNB,Mt1,MYC,TP53	625 (17)
TNFSF12		cytokine		-1.877		0.00394	ADAM8,ATP5PO,Ccl2,Ccl9,CCR1,CD68,CLEC4E,CYCS,ICAM1,IL1B,IL1R2,ITGAM,MMP9,NDUFB5,NFKB2,S100A8,S100A9,SDHA,VCAM1	714 (16)
mir-122		microRNA	Inhibited	-2.209	bias	0.00394	BCAT2,CACYBP,CLIC4,CS,FKBP1A,GYS1,H1F0,IQGAP1,LETM1,NUDC,PKM,PXN,RBM3,SEPT2,SLC1A5,VIM,WARS
TLR9		transmembrane receptor		0.655	bias	0.00394	ARG2,ATF3,Ccl2,CCNA2,CCNB1,CD40,DUSP1,EBI3,EGR1,FAS,GLRX3,IFI16,Ifi202b,IFI35,IL10RA,IL1B,LAMP2,LCN2,LYST,Mx1,MYC,OAS3,ORMDL2,S100A8,SGMS2,SMPDL3A,ST3GAL5,Stfa2/Stfa2l1,TNFRSF13B,TNFRSF1B,TNFSF13B,TP53,WDR92,Wfdc17,XBP1	592 (20)
PNPLA8		enzyme		0.45		0.00398	DGAT1,HSP90B1,HSPA5,Mt1	282 (8)
TRPC4AP		transporter	Inhibited	-2	bias	0.00398	FBL,HSPD1,NOP56,NPM1
NELFCD		other				0.00398	BSG,CCNB2,JUNB,TOP2A
SMARCA1		transcription regulator				0.00398	CDKN1A,GADD45A,MYC,TP53	642 (7)
TXNRD1		enzyme				0.00398	BAX,FAS,GPX3,TP53	790 (21)
TSG101		transcription regulator		-1.154		0.00398	CDKN1A,FAM89B,STMN1,TP53	685 (17)
methoxychlor		chemical toxicant		0.625	bias	0.00398	BAX,HSP90AB1,HSP90B1,LTF	341 (7)
ciclopirox olamine		chemical drug				0.00398	BIRC5,CDK4,CDKN1A,TF	415 (7)
theaflavin		chemical - endogenous non-mammalian		-0.152		0.00398	CDKN1A,CDKN2D,ICAM1,VCAM1	539 (18)
thymidine		chemical - endogenous mammalian		0.105		0.00398	CDKN1A,FAS,TK1,TP53	685 (19)
black raspberry extract		chemical drug				0.00409	AHNAK,CCDC115,CD44,CLDN1,COPS5,GATD3A/GATD3B,GOLGA7,H2AFZ,HSP90AA1,KLF10,LAMP2,NDEL1,PHGDH,PSMA6,TMED2,TTC1,TUBB6,TXNL1,UBE2C,YWHAH
CFTR		ion channel		0.577		0.00412	ACAA1,ACAA2,CAPG,CFH,FAS,FDPS,HADH,HSD17B4,LRG1,NFKB1,PGLYRP1,S100A8,SLFN12L,Slfn2,SQLE,Tmsb4x (includes others)	527 (7)
ING1		transcription regulator		1.179		0.00413	BAX,CCNB1,CDKN1A,DEK,HDAC1,HSPA1A/HSPA1B,RPS14,TP53,TPT1	558 (12)
PRKN		enzyme		1.151		0.00413	Cox5b,GLO1,MYC,NDUFS3,NDUFV2,PDHA1,PRDX1,PRDX2,XBP1	505 (7)
SU6656		chemical toxicant		-1.066	bias	0.00413	ATF3,Ccl2,EGR1,INHBA,JUNB,Mt1,MYC,UCK1,ZFP36L1	713 (20)
NKX2-3		transcription regulator		-0.163		0.00416	ARHGDIB,BTG1,CASP1,CCNB2,CD300LG,CD68,CDKN3,DDX60,EIF4B,FBXO6,GCA,HFE,HIST2H2AA3/HIST2H2AA4,IL18BP,KLF4,LAP3,LGMN,LY6E,MCTP1,PAPSS2,PHGDH,PLSCR1,PSAT1,PSMB8,PSMB9,RPL23,RPS23,RPS29,SHMT2,SLC40A1,TXNDC12,UNC93B1,VCAM1
TMEM173	0.763	other		0.788	bias	0.0042	C15orf48,GAS7,HDC,HOPX,IFI16,Ifi27l2a/Ifi27l2b,IFITM3,IL1B,LCN2,Mx1,OAS1	357 (11)
ITGA5		transmembrane receptor		-1.751	bias	0.0042	CD40,CD44,CDK4,CDKN1A,IL1B,JUN,JUNB,MMP9,PLAUR,PXN,RAC2	379 (14)
PRKCA		kinase		0.137	bias	0.00421	ARHGDIB,CD55,CDKN1A,CTSB,CYBB,CYCS,EGR1,FN1,GBA,HSPA1A/HSPA1B,ICAM1,INSIG1,JUN,MMP9,MYC,NFKB1,PRKCD,S100A8,S100A9,TP53,VCAM1	567 (17)
HNF1A		transcription regulator	Activated	2.219	bias	0.00431	ACAT2,AIMP1,Akr1c12/Akr1c13,ANXA4,AP3M1,ATG3,BCL6,CD302,CD55,COQ7,CTSZ,CYP27A1,DCAF13,FAM107B,FAS,FFAR2,FH,G0S2,GARS,GATM,GBE1,GDI2,HOPX,HSD11B1,HSPA5,IFNAR1,KIF20A,LIPA,LSG1,LY6E,MID1IP1,MRPS18B,NAPA,NDUFS2,NOP16,OGDH,PCNP,PFKL,PGK1,PIH1D1,PSMA5,RAB37,RNASE4,SLC40A1,SLPI,SNX17,SRI,TARS,TMED10,TNFRSF1A,TPI1,TRPM2,TXNDC12,UCP2,Ugt1a7c,UQCRC2,UROD,XBP1,ZBED3	847 (13)
ADIPOQ		other		-0.384		0.00432	ACSL1,ACSL5,ADIPOR1,BIRC5,CASP6,Ccl2,CDKN1A,CLEC10A,CYBB,DGAT1,DUSP1,EGR1,FN1,ICAM1,Klrk1,MSR1,NCF1,PCNA,PDCD4,PDHB,PRDX3,PRDX5,SLC2A3,SOAT1,TP53,UCP2,VCAM1	538 (17)
miR-34a-5p (and other miRNAs w/seed GGCAGUG)		mature microRNA	Inhibited	-2.988	bias	0.00437	ATF3,BIRC5,CDK4,CDKN1A,HDAC1,ICAM1,KLF4,LIN28A,MAP2K1,MCM3,MYC,TP53	729 (19)
CLEC11A		growth factor				0.00437	ALOX5,ANXA1,BIRC5,CAP1,CD74,IL1B,LTB4R,MIF,NFKB1,S100A6,SLPI,TKT	468 (14)
lipoteichoic acid		chemical - endogenous non-mammalian	Inhibited	-2.579	bias	0.00438	CAMP,Ccl2,CCR1,CD14,CXCR4,CYBB,EBI3,ICAM1,IL1B,IL1RN,MMP9,NLRP3,SLC16A3,TREM1	433 (16)
3-deazaneplanocin		chemical drug		0.485	bias	0.00442	AKNA,CDKN1A,FAS,FZR1,IRF8,MVP,MYC,NUPR1,PPP1R15A,PPP1R18,SLPI,TRIM14,TSC22D3	373 (7)
EGLN1		enzyme		-1.14		0.00442	ATP13A2,AURKA,Ccl2,CXCR4,ICAM1,IL1B,INHBA,MMP8,MYC,PFKL,PGK1,TPI1,VCAM1	648 (19)
POU2F2		transcription regulator	Activated	2	bias	0.00443	ALOX5,ARG2,BCL6,CCDC28B,DHRS9,EIF2S2,ENO1,GATM,GPR183,HMBS,JUN,LY6E,MCM7,MYC,RPS2,SNRPB,XBP1	217 (7)
phorbol esters		chemical - other		-1.152	bias	0.00443	ANXA1,B2M,CD44,DUSP1,EGR1,ERCC1,HSD17B4,IL1B,ITGAM,JUN,JUNB,MMP9,NFKB1,OSM,PTPRO,REL,TXN	614 (16)
HGF		growth factor	Activated	2.25	bias	0.00449	AIMP2,ATF3,AURKA,AURKB,BIRC5,CASP1,CASP8,Ccl2,CD40,CD44,CDC20,CDK4,CDKN1A,CDKN3,CKS1B,CNBP,CSE1L,CXCR4,DKC1,EBP,EGR1,EMP1,FEN1,FN1,FPR2,GBA,GMNN,GPSM2,ICAM1,IL1B,INHBA,INSIG1,IRF8,ITGB1,KIF22,LCN2,LGMN,LY75,MAT2A,MCM2,MCM5,MMP8,MMP9,MYC,NFKB1,NRP1,PCNA,PGK1,PHB,PLAUR,PLK1,PTTG1,S100A9,SNRNP70,TACSTD2,TAGLN2,THBS1,TMEM97,TNFRSF1A,TP53,TRIB1,UBE2C,VCAM1,VIM,YWHAH	719 (18)
BRCA1		transcription regulator		-0.292		0.00462	APOBEC1,BAX,BIRC5,CCNB1,CCNB2,Cd24a,CDKN1A,CTSD,DUSP3,EGR1,FAS,FEN1,GADD45A,H2AFX,H3F3A/H3F3B,IFNAR1,Ly6a (includes others),MYC,PCNA,PLK1,PLSCR1,PLTP,RUVBL2,TP53,UBE2I,VCAN,VIM,XPC	821 (24)
PKM	-0.352	kinase		-0.531		0.00466	EGR1,ENO1,IL1B,ITGB1,MMP9,MYC,NDUFB8,PKM,SDHB,UQCRC2	709 (21)
CD2		transmembrane receptor		1.706	bias	0.00466	CCNA2,CCNB1,CD40,CD44,CD48,FAS,HLA-DMA,ICAM1,ITGAL,TP53	455 (17)
FBXO32		enzyme	Activated	3.023		0.00466	BCAT2,CALR,CDK5RAP3,DNAJC3,ERP44,GADD45A,HSPA5,IL1B,ISYNA1,NANS,OAT,PDIA3,RAB27A,RPN1,STT3A,XBP1
D-fructose		chemical - endogenous mammalian		-0.262	bias	0.00466	Ccl2,CD68,FN1,HP,ICAM1,IL1B,ITGAM,THBS1,TKT,TXN2	556 (15)
mannitol		chemical - endogenous mammalian	Activated	2.4		0.00468	AKR1B1,Ccl2,FN1,HDC,ICAM1,JUN	798 (20)
KLK4		peptidase				0.00468	CCNB1,CCNB2,CDKN1A,CDKN3,GADD45A,PCNA	216 (7)
S100B		other		-0.243	bias	0.00468	Ccl2,CDKN1A,IL1B,JUN,MYC,TP53	385 (14)
ADRB3		G-protein coupled receptor		-0.647	bias	0.00468	Ccl2,EGR1,IL1B,JUN,JUNB,UCP2	437 (16)
TREM2	0.739	transmembrane receptor		1.465		0.00468	Ccl2,CD40,CX3CR1,IL1B,IRF8,TREM1	396 (13)
gefitinib		chemical drug		0.244		0.00468	AURKA,AURKB,BIRC5,BTG2,C3,Ccl2,CCNB1,CDKN2D,CEBPD,CTSA,CTSB,EPSTI1,HSP90B1,IL1R2,KIF23,LTF,MCM3,OSM,PCNA,PLAUR,PTTG1,S100A9,SLC2A3,SLPI,Stfa1 (includes others),TOP2A,VIM	812 (22)
IKBKG		kinase		1.378	bias	0.00476	BAX,C3,Ccl2,Ccl9,CCR1,CEBPD,CTSB,CTSZ,GM2A,GRN,HLA-A,ICAM1,IFI16,IL1B,IL1RN,JUNB,LCN2,Mt1,NFKB2,RELB,Slfn2,TMEM176B,TNFRSF1B	769 (16)
glucocorticoid		chemical drug		-1.599		0.00483	ALOX5,ANXA1,BAX,CCND3,CD44,CD74,CDK4,CDKN1A,CEBPD,CRIP1,CSF1R,CXCR4,DUSP1,FAS,FN1,GPX3,GRN,ICAM1,IL10RA,IL16,IL1B,IL1R2,IL1RN,IL6R,IRF8,LAT2,MIF,MMP9,Mt1,MYC,NCF1,OAS1,Orm1 (includes others),PFKL,SLPI,STX11,TK1,TNFRSF1A,TP53,TSC22D3,TXNIP,VCAM1	591 (18)
dinoprost		chemical - endogenous mammalian		1.45		0.00486	ANXA4,ATP1A1,GSTP1,HSPA1A/HSPA1B,HSPA4,IL1B,JUN,LIPA,MGST1,MMP9,MYC,PDIA4,THBS1,YWHAE,YWHAG	544 (20)
CSF2RA		transmembrane receptor		0.351	bias	0.00491	ITGAM,JUN,JUNB,MYC,SNAP23	774 (19)
LMX1A		transcription regulator	Activated	2.236	bias	0.00491	COX6A1,NDUFA2,NDUFA3,NDUFA4,UQCRQ
mannose		chemical - endogenous mammalian		-1.342		0.00491	HSP90B1,HSPA5,ICAM1,PDIA3,THBS1	665 (21)
IL24		cytokine		1.696	bias	0.00496	BAX,BCL6,CASP8,Ccl2,EIF2A,FAS,GADD45A,HSP90B1,HSPA5,PPP1R15A,XBP1	558 (16)
RGS10	0.883	other				0.00496	BCL6,CASP1,CCR1,FAS,IL10RA,IL1B,IL1R2,ITGAM,ITGB2,TNFRSF1A,TNFRSF1B
RIPK2		kinase		0.398	bias	0.00501	ACADL,ACSL1,ARL5C,Ccl2,CD40,CLEC4E,CLEC5A,DGAT1,DGAT2,ICAM1,LMO4,MARCKSL1,NFKB2,VCAM1	511 (13)
A23187		chemical reagent	Activated	2.44	bias	0.00502	ATF3,CALR,CD14,CD40,CYCS,EGR1,EIF6,FN1,HSP90B1,HSPA5,ICAM1,INHBA,JUN,JUNB,LCN2,MSR1,MYC,PON2,SDF2L1,TP53	681 (18)
TWIST2		transcription regulator		1.719		0.00506	BIN1,CD44,CDKN1A,CDKN2D,FN1,IL1B,MMP9,VIM,ZEB2	500 (13)
amiodarone		chemical drug		1.414	bias	0.00506	ASAH1,BCKDHA,GLUD1,GRN,HSPD1,ICAM1,SLC2A3,TF,WIPI1
BIRC5	0.706	other		-0.879		0.0051	AURKB,BAX,BIRC5,Cd52,CD74,CDKN1A,FN1,HLA-DQA1,HLA-DQB1,PTTG1,TP53,VIM	829 (26)
FSH		complex		-1.319		0.00519	ARL6IP5,ATP2B1,ATP5IF1,BTG2,CAPZA1,CD55,COPS5,CSNK1A1,CTSV,CXCR4,CYFIP2,DHRS3,DHX15,DUSP1,DUSP3,HBP1,HSD11B1,IL1RN,IL6R,INHBA,JUN,JUNB,KLF10,LGALS1,MAP1LC3B,MAP2K1,MMP9,MYC,NPC2,PCNA,PDXK,PGK1,PKM,POP5,PPIH,PRKX,PSMD1,PSMD3,RAB27A,RANGAP1,RARA,RPL39,SCARB1,SNAP23,STIP1,TF,THBS1,TK1,TMBIM6,TP53,TRIB1,TUBA1A,UBE2L3,YTHDF2	836 (20)
LEP		growth factor		0.503		0.00522	ACADL,ACAT1,ACSL5,ADAM8,ASAH1,ASS1,ATP5F1A,ATP5PB,BAX,BID,BIRC5,CASP6,Ccl2,CCNA2,CD14,CD40,CD63,CD68,CDKN1A,CYBB,DGAT1,EGR1,ETFDH,FAS,GADD45A,GOT2,GPX1,HSPA5,ICAM1,IDH1,IL1B,IL1R2,IL1RN,ITGAM,JUN,JUNB,LIPA,MAP1LC3B,MYC,NCF1,P2RX4,PCNA,PPP1CA,PRDX1,PSMB3,SCARB1,SLC25A5,SLC27A4,SOD1,SORD,THBS1,TMED9,TNFRSF1A,TP53,TPRA1,TSPO,UCP2,VCAM1,VIM	786 (18)
leukotriene B4		chemical - endogenous mammalian		-1.016	bias	0.00526	CAMP,Ccl2,IL1B,ITGAM,JUN,LTB4R,MMP9	589 (15)
mir-183		microRNA		-0.531	bias	0.00526	EGR1,FN1,ITGB1,KLF4,SLC39A1,SLC39A7,VIM
NTRK1		kinase		0.154	bias	0.00526	CDKN1A,EGR1,GADD45A,H2AFX,LGALS1,MMP9,TP53	490 (18)
PSMD10		transcription regulator		-0.447	bias	0.00526	BAX,CDK4,CDKN1A,ICAM1,IKBKB,PCNA,TP53	638 (20)
Cdkn1c		other	Inhibited	-2	bias	0.00526	BAX,CCNA2,CDKN1A,CDT1,CXCR4,EGR1,MCM3	445 (7)
tosedostat		chemical drug	Activated	2.121	bias	0.0053	ASS1,ATF3,CDKN1A,GADD45A,PPP1R15A,PSAT1,SARS,WARS
FAAH		enzyme	Inhibited	-2.828	bias	0.0053	ATP5PD,RPL17,RPL5,RPL7,RPS18,RPS2,Rps3a1,RPS6
STAT5A		transcription regulator		-0.575		0.00534	ANKRD22,BAX,BCL6,C15orf48,CASP6,CASP8,Ccl2,CCND3,CD68,CDK4,CDKN1A,CEACAM1,EIF1AY,FAS,GADD45A,HIST1H1C,HIST2H2AA3/HIST2H2AA4,ICAM1,IFITM2,IL6R,KLF10,Klrk1,LCN2,LTB,MYC,OAS1,OSM,PSMB8,RPA1,SELENBP1,SLC2A3,SLC7A7,SRP9,TACSTD2,TGFBI,TNFRSF14,TNFRSF1A,TP53,TXNIP,WARS,YWHAG	598 (19)
DDIT3		transcription regulator		1.872		0.00554	ATF3,Ccl2,CEBPD,CLPP,DCTPP1,FN1,HSPA5,HSPD1,HSPE1,IL1B,ITGAM,LCN2,PCNA,PPP1R15A,SARS,TSC22D3,TXNIP,VIM,WARS,XBP1	738 (16)
YAP1		transcription regulator		0.887	bias	0.00554	ACAT1,ACAT2,AURKB,BAX,BIRC5,CASP8,CDKN1A,FN1,ICAM1,MCM6,MYC,NDUFB3,NDUFS8,NUPR1,PLK1,RASSF4,SLC2A3,UHRF1,VCAM1,VIM	676 (20)
CDKN1B		kinase		-1.971	bias	0.00554	ARL10,B2M,CCND3,CCT6A,CDK4,CDKN1A,COPS5,EGR1,HSPA5,ITGAM,LGALS3,MCM5,MCM7,MMP9,MYC,NDEL1,PCNA,PES1,S100A9,TK1	722 (23)
VEGFB		growth factor		-1.306		0.00557	ATF3,BAX,BID,CASP8,GPX1,PRDX1,PRDX5,SLC27A4,SOD1,TP53	302 (10)
E2f		group	Activated	2.238	bias	0.00563	ALG5,Bmyc,CCNA2,CCNB1,CSDE1,EXOSC8,GINS2,GMNN,GOLT1B,HDAC1,ITGB1,MCM2,MCM3,MCM5,MCM6,MYC,PCNA,RPS16,TMEM126A,TP53,UBE2C	717 (16)
alitretinoin		chemical drug		-0.062	bias	0.00564	ANXA5,CASP1,Ccl6,Ccl9,CCND3,CD14,CDK4,CDKN1A,CEBPE,COX4I1,CYCS,CYP4F2,DHRS9,DUSP1,FN1,IFNGR1,ITGAM,LTF,MMP9,PGLYRP1,PLTP,RARA,SOAT1,TK1,VIM	775 (22)
Jnk		group		0.815	bias	0.00568	ANXA5,ASAH1,BAX,BIRC5,BTG1,Ccl2,CD40,CD44,CD55,CDK4,CLEC10A,CXCR4,DUSP1,EGR1,FAS,FN1,GADD45A,HSPA5,ICAM1,IL1B,ITGB7,JUN,MMP9,MYC,NCF1,PLAUR,PLSCR1,PON2,RARA,TP53,VCAM1,VCAN	764 (17)
CAMP	-4.562	other		-1.971	bias	0.00581	BAX,C5AR1,CAMP,Ccl2,CSF3R,CXCR2,CXCR4,FPR2,ICAM1,IL1B,IL1R2,IL1RN,IL36G,ITGAM,ITGB2,NFKB1,TNFSF13B,TP53	593 (17)
POR	-0.419	enzyme	Inhibited	-3.712		0.00583	ACADL,ACAT2,ACSL1,ACTG1,ANXA5,CD74,ECI1,ETHE1,FDPS,GSTM5,HADHB,HLA-A,HLA-DMA,HLA-DQA1,HLA-DQB1,HLA-DRB5,HSD17B10,HSD17B12,INSIG1,LGALS1,Mt1,MVD,PGD,PLA2G7,RETSAT,SQLE,TMEM176A,TMEM97
glucosamine		chemical - endogenous mammalian		-1.201		0.00584	ASS1,Atp5e,ATP5MC2,HSP90B1,ICAM1,NDUFA1,NDUFB9,SLC25A5,TP53,TXNIP,UQCRC2	752 (19)
25-hydroxycholesterol		chemical reagent		0.149		0.00587	ACAT2,ACSL1,ATF3,CYP4F2,EIF2S1,FDPS,GPX3,HSPA5,IL1B,INSIG1,JUN,JUNB,SCARB1	731 (17)
IL32		cytokine		-0.211	bias	0.00592	BAX,CASP1,FAS,ICAM1,IL1B,ITGAM,ITGB2,MMP9,PCNA,PRTN3,TP53,VIM	400 (15)
PAX3		transcription regulator				0.006	ANXA1,ARHGDIB,ASS1,CAPN1,CDKN1A,CST3,CTSA,CXCR4,EIF2S1,FKBP1A,G0S2,GSTM5,IFITM2,IL6R,M6PR,MMP9,NFKB2,NPC2,PCNA,PEA15,PHGDH,PPIB,PSME1,SNRK,SRSF3,TP53,TRIM14,TSPAN3,VCAN,YWHAE	623 (13)
JUNB	-0.674	transcription regulator		0.64	bias	0.00618	ACAT2,ATF3,C3,CD68,CD82,CDC20,COMT,DUSP1,EEF2,FN1,INHBA,JUNB,LCN2,MMP9,MVD,MYL12A,PLAUR,RELB,SWAP70,XBP1,YWHAG	640 (15)
IFN Beta		group	Activated	2.535	bias	0.00621	ATF3,C3AR1,CD40,CD74,CDKN1A,DUSP1,EEF1A1,FN1,HLA-A,HLA-G,IFI16,IFI35,IFNAR2,IL1B,IL1RN,INSIG1,MMP9,Mx1,MYC,OAS1,OAS3,TP53,TRIM14	632 (17)
CAV1		transmembrane receptor		-1.662		0.00621	CD14,CDKN1A,CSF1R,CTSD,EGR1,FAS,HSD17B12,HSPA8,ICAM1,INHBA,NPM1,PCNA,PROM1,RPL17,RPS13,RPS9,SLC2A3,ST6GALNAC4,THBS1,TNFRSF1A,TP53,TXNL4A,VCAM1	823 (21)
mir-210		microRNA	Inhibited	-2.461	bias	0.00622	CBX1,CLASP2,DDOST,ELOF1,H2AFY,IL16,LASP1,MRPL36,NCAM1,NDUFA4,NUP210,P4HB,PDXK,PSAP,SDHD,SEH1L,SH3BGRL
prostaglandin E1		chemical - endogenous mammalian		-0.115	bias	0.0063	CD14,CD40,ICAM1,MYC,RRM1,TP53	802 (20)
Pde4		group		0.294		0.0063	CD14,CD40,CDKN1A,FDPS,ICAM1,TP53	546 (11)
PTP4A3		phosphatase		1.664		0.0063	FN1,HSP90AA1,MYC,PCBP1,PXN,STMN1	772 (18)
MPZ		other				0.0063	DNAJC3,HSPA5,MVD,PPP1R15A,SDF2L1,SQLE
RARRES2		transmembrane receptor		0.97		0.0063	Ccl2,CCNA2,CCNB2,CD55,IL1B,PHB	814 (17)
acetyl-L-carnitine		chemical - endogenous mammalian		0.816	bias	0.0063	BAX,CDKN1A,GADD45A,GLO1,NDUFB8,UQCRC2	348 (11)
dichlororibofuranosylbenzimidazole		chemical toxicant		0.391	bias	0.0063	CDKN1A,CTSD,Hist1h1b,MMP9,MYC,TP53	908 (25)
GATA2		transcription regulator		-1.992		0.00631	ABCA13,ALOX5,CAMP,CD177,Cd33,CDKN1A,CEBPE,CHST13,Clec4b2,CLEC4E,CSF1R,CUL1,CYBB,Ear2 (includes others),EDNRA,F13A1,FCN1,GDA,Gm9733,GPR65,GPX3,HDC,HHEX,ITGAM,LCN2,LTB4R,LTF,Ly6a (includes others),MAFB,MCTP1,MGST1,MRGPRX3,MS4A3,MYC,Ngp,NKG7,OLFM4,PRSS57,PRTN3,RAB44,Retnlg,RPL13,S100A8,S100A9,Stfa1 (includes others),Stfa2/Stfa2l1,TACSTD2,THBS1,TMEM40,TP53,TREM3,TUBA8,VCAM1	754 (21)
ID3		transcription regulator		-1.376		0.00645	BATF,BCL6,BTG2,CCNB1,CCR1,CD44,CDKN1A,CXCR4,DUSP1,DUSP22,ICAM1,IFI16,IFNGR1,IL10RA,IL6R,IRF5,IRF8,KLF7,LGALS1,LMO4,LTB,MMP9,MYC,PREP,REL,RELB,SOX13,TNFRSF1A,TP53,VCAM1	692 (20)
INSIG1	0.54	other		-0.351	bias	0.00645	CD68,CLEC4E,CXCR4,CYP4F2,FABP5,FDPS,HLA-DQA1,IRF8,LCN2,LIPA,PCYT2,PLA2G7,RAB27A,S100A8,S100A9,SCARB1,SQLE,UCP2	734 (13)
diethylstilbestrol		chemical drug		0.374	bias	0.00652	ARHGDIB,C3,CD14,CD55,CDKN1A,CFB,EGR1,EMP1,FAS,FDPS,GADD45A,GLRX,HDC,HLA-A,HSP90AB1,HSP90B1,IGSF6,IL1R2,INHBA,KLF4,LMO4,LTF,MAFB,PCNA,PGLYRP1,PROM1,PTTG1,RNF4,RPN2,S100A6,S100A8,SLPI	595 (19)
CNOT7		transcription regulator				0.00657	B2M,CLDN1,IFI35,LGALS3BP,OAS1,OAS3,PLSCR1,PSMB8	242 (7)
IDR-1002		chemical reagent		1.3	bias	0.00657	C3AR1,Ccl2,Ccl6,CSF3R,CXCR2,NCF1,NLRP3,SLC11A1
VTN		other		0.18	bias	0.00657	CDKN1A,IL1B,ITGAM,ITGB1,MMP9,PLAUR,PXN,S100A10	597 (15)
NOX4		enzyme		0		0.00657	Ccl2,CDKN1A,COX4I1,CS,FN1,H2AFX,ICAM1,TP53	707 (18)
crocidolite asbestos		chemical toxicant		-0.113	bias	0.00657	Ccl2,CD44,GADD45A,JUN,JUNB,MYC,PRKCD,TNFRSF1A	674 (18)
TXN	-0.265	enzyme		-0.729		0.00661	CD40,CDKN1A,ICAM1,IL1B,MIF,MMP9,NFKB1,NSF,TP53,TXN	619 (15)
8,9-epoxyeicosatrienoic acid		chemical - endogenous mammalian		-1	bias	0.00663	CD44,CD82,MMP9,NME1	239 (7)
geneticin		chemical toxicant		1.091	bias	0.00663	BAX,CDKN1A,TP53,XPC
C8		complex		0.781	bias	0.00663	Ccl2,ICAM1,IL1B,VCAM1	280 (8)
STK17A		kinase	Inhibited	-2	bias	0.00663	ATOX1,CCS,GSTO1,NUDT9
TIP60		complex				0.00663	BAX,CDKN1A,MCM3,PCNA	793 (21)
SERPINB2		other		0	bias	0.00663	BAX,CASP8,CCNA2,CD14	591 (13)
Ccl6	-0.996	cytokine		0.762	bias	0.00663	Ccl2,CTSS,CTSV,MMP9
ALOX15B		enzyme		1	bias	0.00663	CBX3,KLF4,Ly6a (includes others),TACSTD2
FANCD2		other		0.762	bias	0.00663	CAT,CDKN1A,GPX1,SOD1	295 (9)
ING4		transcription regulator		0.152		0.00663	Ccl2,CDKN1A,MYC,NFKBIB	815 (19)
RPL11	1.236	other		0.434	bias	0.00663	CDKN1A,MYC,PDCD4,TP53	676 (12)
CAMK2G		kinase				0.00663	CDKN1A,CEBPE,NFKB1,TP53	696 (17)
C9		other		0.781	bias	0.00663	Ccl2,ICAM1,IL1B,VCAM1	280 (8)
YBX3		transcription regulator				0.00663	HLA-DQB1,JUN,MYC,PCNA	45 (3)
SRD5A1		enzyme				0.00663	CLDN1,FABP5,LCN2,Mt1
C7		other		0.781	bias	0.00663	Ccl2,ICAM1,IL1B,VCAM1	280 (8)
NELFE	0.261	other				0.00663	BSG,CCNB2,JUNB,TOP2A	422 (6)
tomatidine		chemical - endogenous non-mammalian	Inhibited	-2	bias	0.00663	EIF2S2,EIF3C,NARS,SARS
RP 73401		chemical toxicant				0.00663	BTG2,CEBPE,EGR1,RARA
BRD4		kinase	Activated	3.427	bias	0.00678	ACSL5,ALDH1B1,AURKB,CCR1,CXCR4,DCPS,DCTPP1,FN1,GTF3C6,ICAM1,IRF8,ITGA1,ITGB1,MAP3K1,MAP4K1,MYC,NME1,SORD,SRM,THBS1,XBP1	290 (7)
BCR (complex)		complex		1.865	bias	0.0068	BCL6,CALR,CCNA2,CCND3,CD44,CDC37,CDK4,CXCR4,EGR1,FAS,HLA-DMA,HSP90B1,HSPA5,ITGB1,JUNB,KLF4,MS4A6A,MYC,NFKB2,REL,S100A10,XBP1	482 (16)
APOA1		transporter		-0.084		0.00682	ATF3,Ccl2,CCR2,CYBB,HSPA5,ICAM1,IL1B,INSIG1,ITGAM,SCARB1,VCAM1	557 (19)
LMNB1		other				0.00682	ATP5F1B,B2M,Ccl2,CRIP1,GDI2,LMNA,MGST1,REEP5,SERINC1,SQLE,TGFBI
9,10-dimethyl-1,2-benzanthracene		chemical toxicant		0.92	bias	0.00682	BAX,BIRC5,CDKN1A,GADD45A,IL1B,JUN,MMP9,REL,S100A8,S100A9,TP53	449 (20)
thioctic acid		chemical drug		0.457		0.00684	BAX,CAT,Ccl2,ICAM1,JUN,MMP9,MYC,PARK7,SOD1,TP53,UCP2,VCAM1	763 (19)
Akt		group		-0.925		0.00704	AIMP2,ATP5F1A,BAX,BCL6,BID,BIRC5,BTG2,Ccl2,CCND3,CD44,CDK4,CDKN1A,COPS6,COX4I1,CTSD,CXCR4,FAS,FN1,IL1B,JUN,LCN2,LMNA,MMP9,MYC,NDUFB8,NDUFV1,NFKB1,OSTF1,PCNA,PEA15,SCARB1,SDHB,THBS1,TMED10,TP53,TRADD,UQCRC2,VCAM1,VCAN,XBP1	659 (15)
STOX1		other				0.00705	ACTG1,AHCY,CHST12,RPL17,SRSF7
YWHAG	0.29	other				0.00705	BAX,CCT6A,GPI,NAPA,TP53	537 (18)
SRSF3	0.666	other		-1.543	bias	0.00705	CCND3,CD44,JUN,PDCD4,TP53	482 (7)
PLA2G4A		enzyme		0.277	bias	0.00705	ANXA5,GSTM5,ICAM1,IL1B,MYC	546 (20)
cetrorelix		chemical drug	Inhibited	-2	bias	0.00705	ANXA5,BAX,PCNA,RPSA,TP53	457 (12)
selenite		chemical toxicant		-0.246	bias	0.00705	BAX,BIRC5,HLA-E,MMP9,Mt1	781 (22)
asiatic acid		chemical reagent		0.562		0.00705	BAX,CCNB1,CDKN1A,FAS,MMP9	589 (13)
galactose		chemical - endogenous mammalian		1.387	bias	0.00705	COX5A,CS,THBS1,TP53,VDAC1
IntegrinÎ±		group				0.00715	ITGAL,ITGAM,ITGB2	416 (7)
ATPase		group				0.00715	CD40,ICAM1,VCAM1
Ho		group				0.00715	CXCR2,ICAM1,ITGAM
olmesartan		chemical drug				0.00715	ICAM1,SCARB1,UCP2
ZBED1		enzyme				0.00715	RPL10A,RPL12,RPS6
MELK		kinase				0.00715	BAX,CDKN1A,TP53	633 (13)
ZMIZ2		transcription regulator				0.00715	CD44,JUN,MYC
SULT2B1		enzyme				0.00715	CCNB1,FAS,MYC
ERN2		kinase				0.00715	HSPA5,ICAM1,XBP1	260 (6)
WZ-4002		chemical - kinase inhibitor				0.00715	NDUFB8,SDHB,UQCRC2	301 (7)
BRCA2		transcription regulator				0.00715	BAX,CDKN1A,TP53	171 (7)
NME3		kinase				0.00715	ITGA1,ITGB1,VIM
HK2		kinase				0.00715	NDUFB8,SDHB,UQCRC2
NUBPL		other				0.00715	NDUFA13,NDUFS3,NDUFV1
VCAM1	-0.503	transmembrane receptor				0.00715	CD44,MMP9,VCAM1	427 (16)
PSMB5	0.441	peptidase				0.00715	GSTP1,PSMB1,PSMB2
CDC27		other				0.00715	CCNB1,PLK1,UBE2C	390 (3)
RAB7A		enzyme				0.00715	EGR1,RPS6,VIM	394 (11)
LY379196		chemical - kinase inhibitor				0.00715	CD55,EGR1,MSR1	256 (6)
tin mesoporphyrin		chemical drug				0.00715	ICAM1,Slc25a1,SLC25A5
floxuridine		chemical drug				0.00715	CCNB1,GADD45A,TP53
pemetrexed		chemical drug				0.00715	DCK,SLC29A1,TP53
monobutyl phthalate		chemical toxicant		-1.667		0.00738	Hnrnpa1,NUMB,PCBP1,Ppp2r5c,SNRPA1,Snrpe,SPG21,SRSF3,TWF2
sulindac		chemical drug		0.944		0.00766	BIRC5,CCNA2,CCNB1,CCNB2,CDC16,CDC20,CDKN1A,G0S2,IL1B,MYC,NAP1L1,SERPINB1,TP53	731 (16)
thyroid hormone		chemical - endogenous mammalian		-1.857		0.00785	ACSL5,ATP5MG,BTG2,CCNA2,CDKN1A,COMT,Cyb5r3,DAD1,DBI,DNAJC3,EGR1,FDPS,GDI1,HSP90AB1,MYC,NDUFB5,NR1H2,OAT,PGD,PHYH,S100A10,SSRP1,Tmsb4x (includes others),UCP2,UQCR10,UQCRHL,VIM,YWHAE	767 (23)
Gm-csf		group		1.586	bias	0.00794	BAX,BIRC5,CD14,CD40,FAS,ICAM1,IL1B,JUN,JUNB,MMP9,MYC	470 (17)
berberine		chemical drug		0.292		0.00804	ATP5F1A,ATP5MC2,BAX,BIRC5,BSG,CASP8,CD40,CDK4,CDKN1A,FN1,ICAM1,IL1B,MMP9,PCNA,SCARB1,TP53,UCP2,VCAM1,VIM	516 (17)
TRAF3		enzyme		-0.081		0.00826	ANXA4,CCR1,EBI3,FAS,FFAR2,HSPA5,ICAM1,IL1B,MPEG1,NFKB2,PLBD1,PYGL,RELB,SNRNP25,TK1,XBP1	457 (15)
YWHAZ		enzyme	Inhibited	-2.201		0.0083	Acp5,HSP90B1,HSPA5,TP53,TSC22D3,XBP1	436 (13)
NTRK2		kinase	Activated	2.735	bias	0.00832	BID,CASP1,CCNA2,CDCA3,CDCA8,CDK4,CDKN1A,EGR1,MCM5,MYC,PCNA,PYCARD,THBS1,VIM	532 (19)
ZBTB7A		transcription regulator		0.036	bias	0.00846	ADH5,CDKN1A,MYC,NRP1,PKM,POLB,SLC2A3	661 (12)
ADAMTS12		peptidase		1.937	bias	0.00846	CLEC4E,HDC,LCN2,LGALS1,S100A6,S100A8,S100A9
U0126		chemical - kinase inhibitor		-0.216	bias	0.00862	ADORA2B,ARG2,ATF3,BAX,BIRC5,C3,CAMP,Ccl2,CCND3,CCR2,CD44,CDK4,CDKN1A,CEBPD,CSF1R,CYBB,CYP4F2,DUSP1,EEF1A1,EEF2,EGR1,EIF1AX,EMP1,ERCC1,FN1,G0S2,GRN,GSN,HLA-DQA1,HSP90AB1,HSPA5,ICAM1,IER2,IL1B,IL1R2,INHBA,ITGB1,JUN,JUNB,KDM6B,KLF10,LAMP1,LAMP2,MAT2A,MCU,MMP9,MYC,NUMB,PABPC1,PLAUR,RAC2,RFTN1,RND3,RPS6,S100A9,SIRPA,SLC2A3,TF,THBS1,TP53,TRIB1,TSC22D3,TXN,VCAM1,VIM	720 (18)
Npm		group				0.00881	CDKN1A,RPL3
L-ornithine		chemical - endogenous mammalian				0.00881	ARG2,CDKN1A	171 (7)
dibutylnitrosamine		chemical toxicant				0.00881	PCNA,TP53
Tap		complex				0.00881	HLA-E,HLA-G
SFTPA2		other				0.00881	HSPA5,XBP1
UFL1		enzyme				0.00881	CDK5RAP3,DDRGK1
RBMS3		other				0.00881	CDK4,MYC
NSA2		other				0.00881	CDKN1A,TP53
MAGEA2/MAGEA2B		other				0.00881	BAX,CDKN1A
GPR4		G-protein coupled receptor				0.00881	ICAM1,VCAM1
Importin alpha		group				0.00881	CDKN1A,TP53	522 (7)
diaziquone		chemical drug				0.00881	CD40,IL1B
dinaciclib		chemical drug				0.00881	HSPA5,XBP1	581 (12)
ZMAT3		other				0.00881	BAX,TP53	309 (12)
CSDE1	0.329	enzyme				0.00881	CSDE1,MYC
CELA1		peptidase				0.00881	HLA-A,HSPA1A/HSPA1B
PTPA		phosphatase				0.00881	MYC,VCP	253 (7)
AMD1		enzyme				0.00881	MYC,Tmsb4x (includes others)	482 (7)
CNBP	0.536	transcription regulator				0.00881	MYC,RPS6
mir-331		microRNA				0.00881	MYC,PLAUR
NEDD8	0.553	enzyme				0.00881	IFNAR1,TK1
SALL2		transcription regulator				0.00881	BAX,CDKN1A
MAGEA4		other				0.00881	CDKN1A,TP53
GPR34		G-protein coupled receptor				0.00881	ITGAM,ITGB2
PIKFYVE		kinase				0.00881	ATF3,MAP1LC3B
TSPYL2		other				0.00881	CDKN1A,TP53	505 (10)
IFI30	1.473	enzyme				0.00881	CTSS,HLA-A
CARM1		transcription regulator		1.53	bias	0.00881	C3,Ccl2,CCNB1,CDKN1A,FTL,GADD45A,HSP90AA1,ICAM1,MYC	856 (19)
TXNDC5	0.886	enzyme				0.00881	CTSB,MMP9
GNB1		enzyme				0.00881	CDKN1A,CYTIP,DGAT1,DUSP1,IL1B,IL1R2,MAFB,NFKB1,TSC22D3	629 (19)
LSINCT5		other				0.00881	CASP1,IL1B
RPS25	0.897	other				0.00881	MYC,TP53
TAGLN		other				0.00881	MMP9,TP53	516 (7)
STAMBP		enzyme				0.00881	CXCR4,MYC	301 (7)
PCBP4		other				0.00881	CDKN1A,TP53
PDIA6	1.086	enzyme				0.00881	HSP90B1,HSPA5
STUB1	0.355	enzyme		-0.707	bias	0.00881	BIRC5,CCNA2,CDKN1A,FBL,JUNB,NFKB2,PCNA,RIPK3,TP53	883 (26)
RAMAC		other				0.00881	MYC,RUVBL1
Sf1		other				0.00881	Ccl2,VCAM1
APH1B		peptidase				0.00881	APH1A,TP53	749 (13)
MI-63		chemical reagent				0.00881	CDKN1A,TP53
DUOX2		enzyme				0.00881	CDKN1A,TP53	640 (13)
RPS19	1.368	other				0.00881	CD74,MIF
Setd1b		other				0.00881	ADIPOR1,Cox7c
amsacrine		chemical drug				0.00881	JUN,MMP9
dicumarol		chemical drug				0.00881	Mt1,TP53
cation		chemical - other				0.00881	GSTP1,ITGB2
thiamine		chemical - endogenous mammalian				0.00881	AKR1B1,TKT
vinflunine		chemical drug				0.00881	CDKN1A,TP53	460 (7)
KT 5926		chemical - kinase inhibitor				0.00881	CD14,VCAM1
hexamethylene bisacetamide		chemical reagent		-1.612		0.00915	CDKN1A,CEBPE,CREG1,FN1,HSPA8,NPM1,POLR1D,RPL18,SNRPB,TCP1
N-acetylsphingosine		chemical reagent		0.492		0.00915	BAX,BID,CAT,Ccl2,CDKN1A,GSTM5,HSD11B1,JUN,RARA,TP53	617 (17)
RASSF1	0.252	other		-0.316		0.00919	CCNA2,CDKN1A,CREG1,CXCR4,EGR1,EMP1,GSN,HIST1H2BC,KLF10,KLF4,LITAF,MTUS1,MYC,PROS1,TUBB,TUBB2A	600 (21)
carboplatin		chemical drug		1.265	bias	0.00919	CD44,LCN2,LGALS3,LXN,MCM3,Ms4a6b,MYC,RBM3,TP53,TUBB,VIM	441 (13)
Ifn gamma		complex		1.115	bias	0.00945	CASP1,Ccl2,CDKN1A,CSE1L,CYBB,FAS,FN1,ICAM1,IL18BP,IL1B,IRF8,Ly6a (includes others),LY96,MMP9,MYC,PSME1,PSME2	511 (15)
WNT1		cytokine	Activated	2.534	bias	0.00966	BIRC5,CCNB1,CCND3,CDKN1A,EEF1A1,EGR1,EIF1AX,EIF3C,EIF4E,EIF5A,FN1,GRN,JUN,JUNB,LY6E,MYC,NXF1,PDCD4,RPS6,Tnfsf9,TP53	779 (22)
SHARPIN		other				0.00977	CASP1,IL1B,MLKL,RBCK1,RIPK3	234 (7)
PURA		transcription regulator				0.00977	CASP8,CDKN1A,ITGAL,ITGAM,MYC	484 (7)
ZNF148		transcription regulator		-1.106	bias	0.00977	CDKN1A,Cox5b,FN1,ITGAM,VIM	502 (7)
EZR	-0.288	other		-1.575		0.00977	ATF3,BAX,BIRC5,FAS,HNRNPA2B1,IL1B,MMP9,MYC	429 (17)
PNN		other		-1.109		0.00977	BSG,CDK4,CDKN1A,JUN,MYC
IL17RA		transmembrane receptor	Inhibited	-2.098	bias	0.00977	Ccl2,CCR1,CSF3R,CXCR2,IL1B,MMP9,S100A8,S100A9	472 (15)
Z-551		chemical reagent		0.13	bias	0.00977	Ccl2,CD68,IL1B,ITGAM,UCP2	292 (7)
monorden		chemical - endogenous non-mammalian		1.342		0.00977	BAX,GSN,HSP90B1,Hspa1b,HSPA5	434 (16)
N-ethyl-N-nitrosourea		chemical toxicant				0.00977	BAX,CDKN1A,HSP90AA1,ICAM1,Mt1	171 (7)
semaxinib		chemical drug				0.00977	LCN2,LTF,MMP9,NADK,PARP1,PCNA,SLPI,THBS1	421 (14)
deguelin		chemical drug		0.544		0.00977	BAX,BIRC5,CDKN1A,PARP1,TP53	411 (15)
TGFBR2		kinase		-0.294		0.0101	ADORA2B,ALOX5,BIRC5,C5AR1,CASP1,Ccl2,CCND3,CCT5,CD14,CD44,CDKN1A,CLIC4,EXT2,FN1,GATM,HSD11B1,ICAM1,IL1B,IL1R2,JUN,Klrk1,MMP9,NIPA2,NRP1,OSTF1,RFC5,SLC2A3,THBS1,TXNIP
PARP		group		-0.195		0.0102	CDKN1A,H2AFX,TP53,VIM
AFAP1-AS1		other		0		0.0102	ARHGDIA,LASP1,PFN1,RAC2
EEF1A2		translation regulator	Activated	2	bias	0.0102	CYBB,ITGAL,ITGB2,NCF1
KCNN4		ion channel		0.225		0.0102	Acp5,MMP9,PPP5C,TSC22D3
CNGA3		ion channel		-1	bias	0.0102	CAPN1,CAPN2,EIF2A,HSPA5
IFNAR1	0.271	transmembrane receptor		0.436	bias	0.0102	ATF3,B2M,Ccl9,CD40,CLEC4E,F10,HLA-A,IFI16,IFNAR1,IFNGR1,IL1B,Ly6a (includes others),Ms4a4b (includes others),Mx1,MYC,OAS1,OAS3,PLA2G7,SLFN12L,SQLE,THBS1,TNFSF13B,VCAM1
ITGA4		transmembrane receptor				0.0102	IL1B,IL1RN,MMP9,RAC2
BCL6B		transcription regulator		0.152	bias	0.0102	CASP8,S100A4,TNFRSF1A,TP53
calmidazolium		chemical drug		0.218		0.0102	EGR1,FN1,NCAM1,VCAM1
okadaic acid		chemical toxicant		1.084		0.0102	ANXA1,BCL6,CCND3,CDK4,CYBB,EGR1,FAM89B,IL1B,IL1RN,JUN,JUNB,KLF4,MMP9,MYC,SRSF3,TK1
2-hydroxy-1-naphthylaldehyde isonicotinoyl hydrazone		chemical reagent		0.132		0.0102	CCNB1,CCND3,CDKN1A,GADD45A
quinidine		chemical drug		0		0.0102	CDK4,CDKN1A,HDAC1,TP53
TAPI-1		chemical - protease inhibitor		1	bias	0.0102	Ccl2,CXCR2,MMP9,VCAM1
phosphate		chemical - endogenous mammalian	Activated	2.034		0.0102	ACAT1,BLVRA,CHST12,Cyb5r3,CYC1,DHRS7,ECM1,ECSIT,NDUFA12,NDUFB10,NPM1,PCNA,SDF2L1,SLC25A5,UQCR11,XRN2
lysophosphatidylcholine		chemical - other		0.776	bias	0.0104	CAT,Ccl2,EGR1,HDAC3,ICAM1,IL1B,JUN,PLAUR,SCARB1
CIITA		transcription regulator		1.283		0.0104	B2M,CD74,HLA-A,HLA-DMA,HLA-DMB,HLA-DQA1,HLA-DQB1,HLA-DRB5,MMP9
eflornithine		chemical drug		0.378		0.0104	C3,CDKN1A,FN1,ITGAL,LGALS3,LGALS3BP,PCNA,PLK1,PSAP
p70 S6k		group		0		0.0105	BAX,CCND3,CDK4,EEF1A1,EEF2,PDCD4,VIM
CTSB	0.985	peptidase		-0.426	bias	0.0105	CDK4,CTSB,CTSV,CYBB,IL1B,MYC,PLAUR
SLC9A3		ion channel				0.0105	B2M,CD74,Ifi47,IRF8,Mt1,PSMB8,PSMB9
ceramide		chemical - endogenous mammalian		1.159		0.0105	BAX,CASP1,ICAM1,IL1B,JUN,MYC,TP53
ZEB2	0.347	transcription regulator		-0.333		0.0106	Clec4b2,CX3CR1,FCN1,GATM,LTA4H,MS4A3,MTA3,NKG7,PRTN3,VCAM1,VIM
MET		kinase		0.264	bias	0.0106	AURKA,AURKB,CD44,CDKN1A,CTSV,FGL2,FN1,HDC,Hspa1b,IL1B,INHBA,ITGB1,JUN,KLF4,MYC,PLK1,SOD1,VIM
RAC1		enzyme		1.539	bias	0.0106	ATF3,BCL6,BID,Ccl2,DPYSL2,DUSP1,FAS,FN1,GSN,ICAM1,IL1B,IL6R,ITGB1,JUN,MMP9,MYC,PLAUR,VCAM1
MAP3K1	0.467	kinase		-0.365	bias	0.0106	ATF3,DUSP1,EGR1,FAS,IKBKB,JUN,PLAUR,PRDX1,THBS1,TOP2A,TP53
Ras homolog		group		-1.067		0.0107	CDKN1A,EGR1,IL16,ITGB1,MMP9,MYC
salinosporamide A		chemical drug		0.109	bias	0.0107	BAX,BIRC5,ICAM1,MMP9,MYC,PEBP1
ADRA1D		G-protein coupled receptor				0.0107	CCNB1,CEBPD,CTSV,DUSP1,EGR1,FABP5,FN1,JUN,PCNA,TMPO
MAP3K5		kinase		1.516	bias	0.0107	BAX,Ccl2,CDKN1A,CYBB,JUN,TP53
ST8SIA1		enzyme				0.0107	C3,C3AR1,C5AR1,CDKN1A,IL1B,MMP9
SCGB1A1		cytokine		1.612	bias	0.0107	C3,FN1,ITGB2,MMP9,S100A8,S100A9
PD 169316		chemical - kinase inhibitor		0		0.0107	ATP5MF,BIRC5,CCND3,CDKN1A,FN1,VIM
tranilast		chemical drug		0.896	bias	0.0107	CD40,CDKN1A,NRP1,TP53,TXNIP,VCAM1
apicidin		chemical - endogenous non-mammalian		0.169		0.0107	CCR1,CDKN1A,FAS,GSN,ITGB7,PRKCD
INS		other		-0.931		0.0108	ACADL,ADIPOR1,ATP5F1A,CAT,Ccl2,CDKN1A,COX4I1,DUSP1,EGR1,EIF4E,FAS,HSPA5,ICAM1,IER2,JUN,JUNB,NDUFV1,OGT,SDHC,Slc25a1,SOD1,Tmsb4x (includes others),TP53,XBP1
ethanol		chemical - endogenous mammalian		0.096		0.0112	ACADL,ADIPOR1,ALOX5,ATF3,BAX,C3AR1,C5AR1,CAPN1,CAT,Ccl2,CD14,CDKN1A,CEBPD,CENPA,CLIC4,CXCR4,DUSP1,EGR1,FAS,GADD45A,HLA-A,HSD17B10,HSP90AB1,HSP90B1,HSPA5,ICAM1,Ifi47,IL16,IL1B,IL1R2,IL1RN,ITGAM,JUN,LGALS1,MAT2A,MCOLN1,MGST3,MMP9,MYC,NCF1,PARP1,PCNA,PHB,RAB3D,RGCC,SLC40A1,SQLE,TP53,TSC22D3,VCAM1
GW9662		chemical reagent		0.037		0.0113	BAX,CD14,CDKN1A,CEACAM1,EGLN2,FN1,HSPA5,INSIG1,KLF4,LCN2,MCM7,MID1IP1,PEA15,UCP2,VCAM1,YWHAE
ERK		group		-0.466	bias	0.0114	ACSL5,ARG2,BAX,BTG2,Ccl2,CCND3,CCR1,CDK4,CDKN1A,CEBPD,DPYSL2,DUSP1,EGR1,FAS,FN1,ICAM1,IFNAR1,IFNAR2,IL1B,ITGAM,ITGB2,JUN,JUNB,KLF10,LCN2,MAFB,MMP9,MYC,THBS1,TP53,TUBA1A,VASP,VCAN,ZFP36L1
BTK		kinase		0.437		0.0116	CCND3,CCT6A,CD40,CDK4,CDKN1A,CTSA,CXCR4,EMP1,FABP5,IFI35,IL10RA,IL1B,JUN,NFKB2,OAS3,PSMD3,RELB,SLC2A3,TP53
TWIST1		transcription regulator		-0.032		0.0117	BAX,C3,Ccl2,CD40,CD44,CDKN1A,EMP3,FAS,FN1,GSN,IL1B,LMNA,LRG1,NCAM1,NT5E,PROM1,RELB,SLC29A1,TF,TGFBI,TP53,VCAN,VIM,ZEB2
CD247		transmembrane receptor	Activated	2.887	bias	0.0117	EIF2S2,ETFA,HSP90AA1,HTATSF1,MTHFS,NDUFB6,RBM3,RPP30,RPS17,SNRNP70,SSR4,TFEC
FLCN		other		0.243		0.0118	ATP5PO,CKB,COX4I1,Cox5b,CYCS,NDUFB4,NDUFV2,UQCR10
ELF4		transcription regulator		-0.822	bias	0.0118	CBX1,CDKN1A,DUSP1,HDC,KLF4,MANF,NDUFS8,TP53
RELA		transcription regulator		-0.349	bias	0.012	ARHGDIB,B2M,BAX,BIRC5,BLVRA,BTG2,C3,CAMP,CASP8,Ccl2,CD14,CD40,CD44,CDKN1A,CFB,CTSB,CXCR4,CYBB,DUSP1,EGR1,FAS,FCGRT,FN1,HSP90B1,ICAM1,IER2,IL1B,IL1RN,JUN,JUNB,KLF10,LTB,MAT2A,MIF,MMP9,Mx1,MYC,NFKB1,NFKB2,NFKBIB,PKM,PLK1,PRKCD,PSMB10,PSMB9,PXN,RELB,Rps15a-ps4,S100A6,SYTL1,TP53,TREM1,VASP,VCAM1,VIM
oblimersen		biologic drug		0.971	bias	0.0121	ATF3,CDKN1A,CEBPD,DUSP1,GADD45A,IFI16,IFI35,IFRD1,KLF10,OAS1,TRIM14
FGF10		growth factor		-0.572	bias	0.0121	AHNAK,ANXA1,ANXA3,CTSB,CTSH,LRPAP1,MMP9,NUMB,S100A6,TACSTD2,TMEM123
IL2RG		transmembrane receptor		0.508		0.0121	BCL6,CCND3,HLA-A,JUN,LTB,MAP4K2,MYC,NPC2,NSMCE1,SESN1,VKORC1
THRB		ligand-dependent nuclear receptor		1.387		0.0122	ATP5MG,BTG2,CASP1,Ccl2,CCNB1,CCND3,CCR1,CDK4,CDKN2D,CSNK1A1,CTSD,CTSH,CXCR4,DAD1,FDPS,GDI1,GSN,JUN,MMP9,NCOA4,NME1,PGD,PHYH,PROM1,PTTG1,TGFBI,TP53,TREM1,Ugt1a7c,UQCRHL,YWHAE
PTGS2		enzyme		0.465	bias	0.0122	ANXA1,BAX,Ccl2,CD44,CD68,CDKN1A,CTSD,CXCR2,CXCR4,DUSP1,EDNRA,EGR1,FN1,HDAC3,ICAM1,IL1B,ITGAL,MMP9,MSR1,MYC,PCNA,PPA1,RPS19,TP53,VPS72
conjugated linoleic acid		chemical drug		0.912		0.0123	Acp5,CXCR4,DUSP1,IL10RA,IL1RN,ITGB2,MMP9,Slc25a1,TP53
verapamil		chemical drug		-0.513	bias	0.0123	BIRC5,CAPN1,ENO1,IL1B,JUN,S100A10,S100A6,TXNIP,VCAM1
PTPN6		phosphatase		0.053	bias	0.0124	BAX,Ccl2,CD44,CDK4,CYBB,FN1,IL1B,ITGB2,MYC,VIM
ID1		transcription regulator		0.126		0.0125	CDKN1A,CEACAM1,EGR1,FN1,ICAM1,IFI16,Ly6a (includes others),MMP9,MYC,PROM1,TF,THBS1,VIM
triptolide		chemical drug		-0.585	bias	0.0125	BAX,BID,BIRC5,CDKN1A,CXCR2,DUSP1,FAS,ICAM1,JUN,MYC,NFKB1,PCNA,TP53
C5		cytokine		0.307	bias	0.0126	ATF3,BCL6,C5AR1,C5AR2,Ccl2,CD55,CD63,CYBB,EGR1,FCGR1A,FN1,HSPA5,ICAM1,IL1B,ITGAM,ITGB2,MMP9,NFKB1,PPP1R15A,VCAM1
N-cor		group		0.594	bias	0.0127	ACSL1,BIN1,CCR1,CDKN1A,CTSB,CTSS,DHRS3,GSTP1,HEBP1,IDH1,IL1B,MBNL1,MCTP1,MMP9,PID1,SHISA5,SNX1
oleic acid		chemical - endogenous mammalian		0.064		0.0127	ACADL,ACSL1,ALOX5,BAX,Ccl2,CD68,CYP4F2,DGAT2,DUSP1,GADD45A,HSPA5,ICAM1,IL1B,LCN2,Mt1,NCF1,SOAT1,UCP2,VCAM1
arsenite		chemical toxicant		-0.435	bias	0.0127	APEX1,ARL6IP5,CDKN1A,DUSP1,EGR1,ESD,GADD45A,GSTP1,HSPA1A/HSPA1B,Hspa1b,HSPA9,INHBA,JUN,MAFG,MYC,RNH1,THBS1,TRA2B
NCF1	-1.205	enzyme		0.896	bias	0.0129	Ccl2,CD14,CD44,CDKN1A,FN1,ICAM1,TNFRSF14
SP4		transcription regulator		1.521	bias	0.0129	ADH5,BIRC5,CDKN1A,HSPA5,MAT2A,NFKB1,PRKCD
ETS1		transcription regulator		0.728	bias	0.0129	ARHGDIB,BAX,CASP1,Ccl2,CD14,CD44,CDKN1A,CSF1R,DNAJA3,EEF1D,EGR1,FN1,HCST,HPSE,HSPA1A/HSPA1B,HSPA8,HSPE1,ICAM1,INSIG1,ITGB2,JUNB,Klrk1,LTB,MMP9,MSR1,MYC,NCF1,NCLN,PARP1,TP53,ZEB2
14,15-epoxyeicosatrienoic acid		chemical - endogenous mammalian		-1		0.0131	Acp5,CD44,CD82,MMP9,NME1
CSF2RB		transmembrane receptor		-0.179	bias	0.0131	ITGAM,JUN,JUNB,MYC,SNAP23
mir-7		microRNA	Inhibited	-2.141	bias	0.0131	BAX,CDKN1A,EIF4E,KLF4,SLC2A3
mir-194		microRNA		-0.152	bias	0.0131	PLAUR,RAP2B,SUMO2,THBS1,TP53
CHEK2		kinase		0.751	bias	0.0131	BAX,BIRC5,CDKN1A,H2AFX,TP53
FCGR1A	0.582	transmembrane receptor				0.0131	FCGR1A,IL1B,IL1RN,ITGAM,ITGB2
DDR1		kinase		0.492		0.0131	Ccl2,CDKN1A,MMP9,TP53,VCAM1
CBX3	0.645	transcription regulator				0.0131	BIRC5,CDKN1A,MYC,PLK1,RSL1D1
silicon dioxide		chemical drug		-0.555	bias	0.0131	CST3,IL1B,JUN,JUNB,NCF1
OSMR		transmembrane receptor		0		0.0132	BAX,BIRC5,C15orf48,Ccl2,Ifi47,IL6R,JUNB,LRG1,OAS1,OSM,PHF11,PSMB9
IL1A		cytokine		-0.436	bias	0.0132	Acp5,ADORA2B,BAX,Ccl2,CCR2,CD40,CD44,CDKN1A,Clec2d (includes others),FAM89B,FAS,HDC,HSD11B1,ICAM1,IFNGR1,IK,IL1B,IL1R2,IL1RN,IL36G,INHBA,ITGB1,JUN,LCN2,MMP9,MYC,NFKB1,P2RY6,S100A8,S100A9,TK1,VCAM1
Sn50 peptide		chemical toxicant		-1.051	bias	0.0132	BAX,BIRC5,Ccl2,FAS,ICAM1,IL1B,MIF,MMP9,MTDH,MYC,TP53,VCAM1
adenosine dialdehyde		chemical reagent				0.0133	GPX1,ICAM1,VCAM1
GPIIB-IIIA		complex				0.0133	CD40,MMP9,PLAUR
2,5-bis(5-hydroxymethyl-2-thienyl)furan		chemical reagent				0.0133	CDKN1A,GADD45A,TP53
exisulind		chemical drug				0.0133	CDKN1A,HINT1,PCNA
vanillyl-N-nonylamide		chemical drug				0.0133	ATF3,GADD45A,HSPA5
PADI4	-1.533	enzyme				0.0133	CDKN1A,GADD45A,OSGIN1
CERS5	0.363	transcription regulator				0.0133	ASAH1,CASP1,IL1B
DOHH	0.672	enzyme				0.0133	NME1,PARK7,PRDX2
RASSF3		other				0.0133	BAX,CDKN1A,TP53
JDP2		transcription regulator				0.0133	Acp5,JUN,TP53
nomilin		chemical - endogenous non-mammalian				0.0133	BAX,CDKN1A,TP53
PFDN5		transcription regulator				0.0133	BAX,PFDN1,PFDN2
PLSCR1	-0.498	enzyme				0.0133	CDK4,CDKN1A,MYC
CNGB3		ion channel				0.0133	CAPN2,EIF2A,HSPA5
RALB		enzyme				0.0133	BIRC5,CDKN1A,TP53
CR1		transmembrane receptor				0.0133	C3,CCND3,PCNA
KRT19		other				0.0133	EIF2S1,ERP29,HSPA5
miR-219a-5p (and other miRNAs w/seed GAUUGUC)		mature microRNA				0.0133	ALOX5,CD14,TNFRSF1B
EIF5A	0.672	translation regulator				0.0133	BAX,CDKN1A,TP53
resolvin D5		chemical - endogenous mammalian				0.0133	CD40,ITGAM,PLA2G7
MSLN		other				0.0133	BAX,MMP9,TP53
AATF		transcription regulator				0.0133	CDKN1A,FAM89B,JUN
USP11		peptidase				0.0133	BAX,CDKN1A,TP53
SERPIND1		other				0.0133	Ccl2,EGR1,IL1B
MIA-459		chemical reagent				0.0133	BAX,IL1B,NFKB2
MIA-313		chemical reagent				0.0133	BAX,IL1B,NFKB2
CIMO		chemical reagent				0.0133	BID,BIRC5,ICAM1
6,7-dinitroquinoxaline-2,3-dione		chemical reagent				0.0133	EGR1,JUN,JUNB
6-cyano-7-nitroquinoxaline-2,3-dione		chemical reagent				0.0133	EGR1,JUN,JUNB
chlorambucil		chemical drug				0.0133	BAX,DEK,FAS
risedronic acid		chemical drug				0.0133	HSPA8,HSPD1,PDIA3
JWH-015		chemical reagent				0.0133	CCR1,CCR2,ICAM1
alpha-hydroxyglutarate		chemical - endogenous mammalian				0.0133	FN1,VIM,ZEB2
TP63		transcription regulator		-0.804	bias	0.0135	ACTL6A,ADRM1,AEN,ATG3,BAX,CCNA2,CCNB1,CCND3,CD82,CDKN1A,CEACAM1,CTSD,CXCR4,DOK1,EMP1,FAS,FN1,GADD45A,HBP1,HSPA4,HSPA8,IL1B,INHBA,IRF5,ITGB1,JUNB,KHK,KIF23,LAPTM4A,LIN28A,MYC,NT5E,PCNA,POLD2,RAC2,RACGAP1,REL,RELB,RPA1,S100A4,S100A8,THBS1,TINAGL1,TIPIN,TMBIM6,TNFRSF1A,TP53,VIM,XPC,ZEB2
lactosylceramide		chemical - endogenous mammalian				0.0136	Ccl2,CD40,HLA-DQA1,ICAM1,RELB,VCAM1
IPMK		kinase		0.928	bias	0.0136	ABHD12,HSP90AB1,JUN,JUNB,PFN1,TAGLN2
resolvin D2		chemical - endogenous mammalian		-0.896	bias	0.0136	Ccl2,IL1B,ITGB2,JUN,LY96,NFKB1
miR-7a-5p (and other miRNAs w/seed GGAAGAC)		mature microRNA		-1.056	bias	0.0136	EIF4E,KLF4,RAF1,SLC3A2,SYNE1,VDAC1
P2RX7	0.38	ion channel		-0.64	bias	0.0136	BAX,CAPN1,CAPN2,IL1B,NLRP3,TNFRSF1A
ELANE	-1.36	peptidase		-1.352	bias	0.014	CD14,CTSB,HSPA5,IL1B,LTB4R,MMP9,OSM,SLPI
GAPDH		enzyme		-0.707	bias	0.014	DUSP1,ENO1,IFITM2,OAS1,OAS3,RIPK3,TXNIP,WARS
gemfibrozil		chemical drug	Activated	2.552	bias	0.0141	ACAA1,ACADL,ANXA7,CNP,ECI1,GADD45A,HADHA,HADHB,Hmgn2 (includes others),IL1B,MYC,NAP1L1,PDCD4
triamcinolone acetonide		chemical drug		0.407		0.0143	ACSL1,ATF3,B4GALNT1,BAX,BID,BTG2,CAPG,CD44,CYTIP,DNA2,DUSP1,EDNRA,EGR1,F10,HFE,IER2,INSIG1,JUN,JUNB,KLF10,MEGF9,MYC,RASL11B,RGCC,SLC31A2,SOAT1,ST3GAL5,TRIB1,TSC22D3,TXNIP
HSPA5	1.098	enzyme		-1.121		0.0143	BAX,BIRC5,EIF2A,HADHA,HSP90B1,HSPA5,HSPA8,MAP1LC3B,P4HB,XBP1
bicuculline		chemical - endogenous non-mammalian		0.013		0.0143	ATF3,BTG2,DUSP1,EGR1,HSPA8,IER2,JUN,JUNB,KLF4,SNORD22
BCL3		transcription regulator		-0.311		0.0144	AP1S1,CAMP,CD40,CD82,HLA-DQB1,ICAM1,IL1B,JUN,PLAUR
TSC1		other		-1.751		0.0144	ATP6V1A,ATP6V1B2,BAX,CASP1,FAM129A,NPM1,Rpl32,RPS6,TP53
fasudil		chemical drug		-0.812	bias	0.0144	Ccl2,CD14,CD40,ICAM1,IL1B,JUN,MIF,MMP9,VCAM1
phenacetin		chemical drug		0.853	bias	0.0144	ANXA1,CD44,LCN2,LGALS3,MYC,PSMB8,RFTN1,S100A10,VIM
NOTCH1		transcription regulator		0.774		0.0146	BCL6,Ccl9,CCND3,CD14,CD44,CD68,CD82,CDKN1A,CEBPD,CSF1R,ECHS1,GAA,GATD3A/GATD3B,GLUD1,GRN,ICAM1,IFI16,IRF8,ITGAM,ITGB1,Ly6a (includes others),MYC,NCF1,NDUFV2,NFKB1,NFKB2,OAT,PDIA3,REL,RELB,RND3,S100A1,SDHA,TP53,TREM3
HDAC1	0.258	transcription regulator	Inhibited	-3.486		0.0147	Acp5,APEX1,ATF3,BAX,BCL6,CCNA2,CCNB1,CCNB2,CD44,CDKN1A,CDT1,CSF1R,DUSP1,EGR1,FAS,GSTP1,H2AFX,LCN2,MCM3,MCM5,MCM7,MMP9,Mt1,MTA3,MYC,OLFM4,PLK1,POLD2,RBBP7,RELB,RGS10,S100A9,TOP2A,TP53,TSC22D3,UHRF1
4-hydroxyestradiol-17beta		chemical - endogenous mammalian		0.91	bias	0.0149	CAT,HSPA5,LTF,NOP58
EPHB1		kinase		0	bias	0.0149	Ccl2,EGR1,JUN,JUNB
TASP1		peptidase		0.762		0.0149	CCNA2,CCNB1,CCNB2,CDKN1A
E2F8		transcription regulator				0.0149	CCNA2,CCNB1,KIF23,RACGAP1
TCF/LEF		group				0.0149	BIRC5,FN1,ITGB1,MYC
ABCA4		transporter		1.192	bias	0.0149	C3,CFB,CFP,GLO1
Collagen Alpha1		group		-1.165	bias	0.0149	CDKN1A,MMP9,PCNA,PLAUR
L1CAM		other		-0.277	bias	0.0149	ARHGDIA,IL1B,MMP9,SQLE
CCAT1		other		1.067		0.0149	CDKN1A,MYC,PCNA,VIM
SFRP4		transmembrane receptor				0.0149	BIRC5,FN1,MYC,VIM
FEM1A		transcription regulator		0.317	bias	0.0149	Ccl2,CD68,IL1B,NFKB1
MAS1		G-protein coupled receptor				0.0149	Ccl2,CLEC10A,CYBB,IL1B
OSTM1		other				0.0149	Acp5,BCL6,IRF8,MAFB
AIFM1		enzyme		1.984	bias	0.0149	NDUFA13,NDUFA9,NDUFB6,NDUFS7
2-[[9-isopropyl-6-[[4-(2-pyridyl)phenyl]methylamino]purin-2-yl]amino]butan-1-ol		chemical reagent		-1.982	bias	0.0149	Ccl2,CCNA2,CDK4,PCNA
ferric ammonium citrate		chemical drug		0.775		0.0149	C3,FTL,GADD45A,MYC
enoxacin		chemical drug		-1	bias	0.0149	Acp5,ATP6V1B2,LCP1,TCIRG1
mimosine		chemical drug		1.982	bias	0.0149	CDKN1A,HLA-DQA1,HLA-DQB1,TP53
RHOA		enzyme		0.701		0.015	BAX,CCNB1,CDKN1A,CTSD,FN1,ICAM1,IL1B,ITGB1,JUN,MMP9,NFKB1,NFKBIB,RND3,SCARB1,VCAM1
E. coli serotype 0127B8 lipopolysaccharide		chemical - endogenous non-mammalian	Activated	2.53		0.0151	AMER2,ANXA1,CASP6,CASP8,Ccl2,CCRL2,CD14,CD40,CXCR4,DERL1,DNAJC3,DOK1,EDNRA,FPR2,GPR108,HSPA5,Ifi47,IL1B,IRF5,LCN2,LGALS3,MAP2K1,NFKB1,P2RY6,PRDX3,PRDX5,TNFSF13B
STAT6		transcription regulator		0.323		0.0151	Acp5,ACSL1,ALDH2,BAX,BCL6,CASP6,Ccl2,Ccl6,Cd24a,CD40,CDKN1A,CRIP1,CTSB,CTSS,EGR1,Erdr1,FCGR1A,IER2,IFI16,IFNAR2,IL10RA,IL1RN,ITGB7,LDLRAD3,LGALS3BP,LTB,Ly6a (includes others),MMP9,Ms4a4b (includes others),Mx1,PLSCR1,PROS1,S100A10,S100a11,SELENBP1,SOX13,SYNGR2,TFEC,VCAM1,XBP1
F2R		G-protein coupled receptor		0.087	bias	0.0152	Ccl2,CD44,CD55,DUSP1,ECE1,EGR1,FN1,ICAM1,IL1B,MIF,MMP9,PLAUR,S100A4,THBS1,TP53,VCAM1,VIM
SOCS1		other	Inhibited	-2.041	bias	0.0157	BAX,BID,Ccl2,CCND3,CD40,CD44,CDK4,CDKN1A,DUSP1,FAS,ICAM1,IFI16,Ifi202b,Ifi47,IFNAR1,IL1B,JUN,Mx1,OAS1,TXN,VCAM1
SUB1	0.466	transcription regulator				0.0157	BAX,GADD45A,NDUFA3,NDUFAB1,NDUFB10,NDUFB8,NDUFB9
B2M	0.346	transmembrane receptor	Activated	2.449	bias	0.0157	FCGRT,HLA-A,HLA-DQA1,HLA-DQB1,HLA-DRB5,HLA-E,IL1B
dithiothreitol		chemical reagent	Activated	2.414	bias	0.0157	ATF3,GADD45A,HSP90B1,HSPA5,LMAN1,MYC,TOR1A
vitamin K3		chemical drug		-0.148	bias	0.0157	BAX,BID,EGR1,FAS,HSPA5,MAP1LC3B,MYC
nitroarginine		chemical reagent		-1.854	bias	0.0157	BLVRA,Ccl9,CD44,EGR1,IL1B,NCAM1,TNFRSF1A
N-methyl-L-arginine		chemical - endogenous mammalian		-1.609		0.0157	FAS,ITGB2,MMP9,PLAUR,PRDX1,SOD1,VCAM1
NCOR2		transcription regulator		0.218		0.0158	C3,CDKN1A,CEBPE,CTSB,CTSS,IL1B,JUN,MYC,OSM,RARA,RELB
N-Ac-Leu-Leu-norleucinal		chemical - protease inhibitor		1.738	bias	0.0162	BAX,CCNB1,CDKN1A,EIF4E,HLA-A,ICAM1,LAMP1,LAMP2,NEDD8,PTTG1,SCARB1,STMN1,TP53,USF1
MECP2		transcription regulator				0.0163	ANXA1,BCAT2,CAPG,DPYSL2,EGR1,GSTO1,GSTP1,HSPA5,JUNB,LMNA,Mt1,MYC,PROM1,RASSF1,S100A4,SLC2A3,UQCRC1,VIM,YWHAB
ADRA1A		G-protein coupled receptor				0.0164	CCNB1,CEBPD,CTSV,DUSP1,EGR1,FABP5,FN1,JUN,PCNA,TMPO
AG490		chemical - kinase inhibitor		-1.93	bias	0.0166	ACAT1,BAX,BIRC5,Ccl2,CCND3,CD68,CDKN1A,ICAM1,IL1B,LY96,MMP9,MYC,PCNA,PTTG1,S100A10
2-methoxyestradiol		chemical - endogenous mammalian		1.168		0.0167	ATF3,BID,CXCR4,EIF5A,LTF,PCNA,SOD1,TP53,YWHAB
ACKR2		G-protein coupled receptor		0.492	bias	0.0167	CCR2,DDX60,IFI16,Ifi27l2a/Ifi27l2b,Ifi47,Ifitm6,IL1B,OAS1,OAS3
IFIH1		enzyme		1.24	bias	0.0167	Bst2,Clec2d (includes others),EGR1,FAS,IL1B,Ly6a (includes others),Mx1,OAS1,RND3
SRSF2		transcription regulator				0.0167	AURKA,AURKB,HSD3B7,PLK1,PPP1R15A,PTBP1,SRSF7,Tmsb4x (includes others),VIM
baicalein		chemical - endogenous non-mammalian		-0.647	bias	0.0167	BAX,BIRC5,CCNB1,CCND3,CYBB,ICAM1,JUN,PTTG1,VCAM1
tributyrin		chemical drug		-1.035	bias	0.0168	ATF3,CD55,CDKN1A,CLDN1,CXCR4,DUSP1,HDAC3,HSPA5,IL1B,INHBA,MYL12A,NFKB2
vitamin E		chemical drug		-0.508	bias	0.0168	BAX,CAT,Ccl9,CD44,CDKN1A,EGR1,IL1B,PCNA,SCARB1,TNFRSF1A,UCP2,VCAM1
BCL2L1	-0.319	other		0.687		0.0168	BAX,Ccl2,CD44,CYCS,ECM1,FAS,FN1,IL1B,Ly6a (includes others),MMP9,THBS1,TNFRSF1A
CTNNB1		transcription regulator	Activated	2.148	bias	0.0168	ACAP1,ACAT1,ACAT2,ALG3,ANXA1,ARHGDIA,AURKA,BCAP31,BIRC5,BTF3,CAPN1,CAPZB,CCNA2,CD44,Cd52,CDKN1A,CDKN2D,CEACAM1,CENPM,CNN2,CREG1,CRIP1,CTNNA1,CTSZ,CYFIP2,DGAT2,DOK1,ECM1,EGR1,EIF5A,Ewsr1,F13A1,FAS,FEN1,FGD2,FN1,GIPC1,GNG10,HDAC3,HHEX,HSPE1,IL1B,ILF3,IMPDH2,IRF8,ITGA1,ITGAL,ITGB1,ITGB2,ITGB7,JUN,KIF23,LAP3,LGALS3,LIMD2,LIPA,LMNA,LY6E,MAP1LC3B,MMP9,MPEG1,MYC,NCAM1,NUMB,OAT,P2RX7,PCNA,PFN1,PLAUR,PLK1…
KDM6B	-0.39	enzyme		1.477	bias	0.017	Ccl9,CD40,FN1,ITGAL,PPIA,VIM
SEMA7A		transmembrane receptor		1.633	bias	0.017	BAX,CCNA2,CTSB,CTSS,EGR1,FN1
pitavastatin		chemical drug		1.361	bias	0.017	CAT,Ccl2,FDPS,MVD,SCARB1,SQLE
lipoarabinomannan		chemical - endogenous non-mammalian		-1.671	bias	0.017	CAMP,CD14,CXCR4,HLA-DRB5,ICAM1,IL1B
Fcgr3		group				0.0172	BAX,IL1RN,ITGAL,ITGAM,ITGB2
CFB	0.358	peptidase		-0.555	bias	0.0172	C3,C3AR1,C5AR1,HSPA5,ITGAM
LATS2		kinase	Activated	2.236	bias	0.0172	AURKB,CCNB1,CDKN1A,PLK1,TP53
miR-199a-3p (and other miRNAs w/seed CAGUAGU)		mature microRNA		-1.109	bias	0.0172	CALU,CD44,FN1,PON2,VCAN
LAMA5		other		0.322	bias	0.0172	Ccl2,CCR1,MMP9,OGFR,TNFRSF1B
S1PR2		G-protein coupled receptor		0.926	bias	0.0172	CAMP,Ccl2,ICAM1,JUN,VCAM1
decursin		chemical - endogenous non-mammalian		0.447	bias	0.0172	BAX,CDK4,CDKN1A,MMP9,MYC
nicotine		chemical drug		1.929	bias	0.0172	BIRC5,Ccl2,CD40,CD44,CDKN1A,DBI,EGR1,ENO1,FN1,Gm21596/Hmgb1,HSPA8,ICAM1,IL1B,ITGAM,JUNB,LGALS3,LITAF,MMP9,NAPA,NFKB1,NSF,PCNA,PLAUR,RAB6A,RPSA,TP53,TREX1
rotenone		chemical toxicant		1.373		0.0178	ADIPOR1,BAX,BSG,CYBB,IL1B,ITGAM,MMP9,TP53,TXNIP,UCP2,VCAM1
TGFA		growth factor		0.389	bias	0.018	BIRC5,CASP1,CDKN1A,GSTP1,ICAM1,ITGAM,JUNB,LCN2,MMP9,PTTG1,S100A10,SLPI,TP53,VIM
mir-10		microRNA		-0.423	bias	0.0182	ALOX5,BAX,CD40,CD44,DGAT1,HDC,IL6R,KLF13,KLF4,LIN28A,PPP1CA,PROM1,PSMD8,TP53,TRA2B
tert-butyl-hydroquinone		chemical reagent		1.016	bias	0.0182	ATF3,FTL,GADD45A,GBE1,GSTM5,GSTP1,HSPA5,HSPA8,ITGAM,JUN,JUNB,OSGIN1,PSMA5,PSMD4,RAB6A
AURK		group		-0.711	bias	0.0187	AEN,BAX,BTG2,CDKN1A,CYFIP2,PDE2A,SESN1,STOM,SULF2,XPC
ANLN		other		-0.632	bias	0.0187	AEN,BAX,BTG2,CDKN1A,CYFIP2,PDE2A,SESN1,STOM,SULF2,XPC
BAK1		other	Activated	2.621	bias	0.0188	HLA-A,IFITM2,IFNAR2,Mx1,PDIA6,TYK2,XBP1
GCK		kinase	Inhibited	-2.646		0.0188	ATP5F1A,ATP5F1C,ATP5MC1,ATP5MC2,ECHS1,FH,HADH
PTX3		other		-1.871	bias	0.0188	Ccl2,CCR2,CX3CR1,IL1B,JUN,MMP9,NFKB1
R-WIN 55,212		chemical reagent		0.049	bias	0.0188	BAX,CASP6,CDK4,ICAM1,IL1B,TP53,VCAM1
miR-122-5p (miRNAs w/seed GGAGUGU)		mature microRNA		-0.044	bias	0.0189	ANXA11,CS,EEF1A1,GYS1,NCAM1,P4HB,PKM,PRDX2,PSME1,SLC35A4,TRIB1,VIM
MBD2		transcription regulator		0.431		0.0189	ADAM15,ASS1,BCAT2,CDKN1A,GSTP1,MMP9,NUPR1,OAT,PLK1,POLB,PROM1,RELB
CD3E		transmembrane receptor		0.9	bias	0.0189	CD3D,CDK4,DNAJA3,FAS,JUN,MMP9,MYC,NFKB1,NFKBIB,SCARB2,TNFRSF1A,TNFRSF1B
Lh		complex		-1.564		0.019	ARL6IP5,ATP2B1,ATP5IF1,CAPZA1,CD55,CSNK1A1,CXCR4,CYFIP2,DHRS3,DUSP1,DUSP3,HSD11B1,MAP1LC3B,MAP2K1,MMP9,NPC2,PDXK,PGK1,PHB,POP5,PPIH,PRKX,PSMD1,PSMD3,RAB27A,RANGAP1,SNAP23,STIP1,THBS1,TK1,TMBIM6,TP53,TRIB1,TUBA1A
SP3		transcription regulator		1.894	bias	0.0193	ACSL1,ADH5,ATF3,BIRC5,Ccl2,CD40,CDKN1A,CEACAM1,DUSP1,EGR1,F10,FAS,GLTP,HPSE,HSPA5,JUN,KLF4,MAT2A,NFKB1,PADI4,PGK1,PKM,PLAUR,PRKCD,PTTG1,SCARB1,SLC2A3,TP53,TSPO,VIM
GNB2		enzyme				0.0195	CDKN1A,CYTIP,DGAT1,DUSP1,IL1B,IL1R2,MAFB,TSC22D3
NFKB2	0.307	transcription regulator		-0.13	bias	0.0195	AKR1B1,CDKN1A,CTSS,CXCR4,GPR183,HLA-DMB,HLA-DQA1,MAT2A,MMP9,MYC,NFKB2,PXN,VCAM1
tempol		chemical drug		0.563	bias	0.0195	CAT,CYCS,ICAM1,MMP9,NCF1,TP53,UCP2,VCAM1
hyaluronic acid		chemical - endogenous mammalian		-0.193	bias	0.0196	BIRC5,Ccl2,CD40,CD44,CSF1R,CXCR4,FN1,ICAM1,IL1B,IRF5,JUN,LY96,MMP9,NCF1,NFKB1,PCNA,PDCD4,VCAM1
TAL1		transcription regulator		1.053		0.0196	Acp5,BCL6,C3,C3AR1,CCNB1,CDKN1A,CDKN3,GSDMD,HADHA,HLA-A,HLA-E,ICAM1,IFNAR1,IL10RA,JUN,KIF20A,LYST,MAP3K1,MCM2,MCTP1,MVD,MYC,NFKB1,NTNG2,PLEKHO1,RBM7,REL,RNASE6,SLC2A3,TUBB4B,UBXN1
atorvastatin		chemical drug		0.284		0.0202	CAT,Ccl2,CD40,CD55,CDKN2AIPNL,COPS5,CRCP,CXCR4,CYBB,CYP27A1,DUSP1,EDNRA,EGR1,FDPS,HYPK,ICAM1,ITGAL,ITGB2,JUN,JUNB,MMP9,MVD,NR1H2,PDXK,RHEB,SOD1,SQLE,TMEM106A,VCAM1
RAS		group	Activated	2.081	bias	0.0203	ARG2,AURKA,CCND3,CDKN1A,CSF3R,EGR1,FN1,GSTP1,Ifi47,JUN,MMP9,MYC,NFKB1,NPM1,PDCD4,PLAUR,PRDX1,RAE1,TP53,VIM
RXRA		ligand-dependent nuclear receptor		1.18	bias	0.0203	ACSL1,AHCY,ARG2,C3,CAT,Ccl6,Ccl9,CCNA2,CCNB1,CCND3,CDKN1A,CEBPD,CEBPE,CTSB,CTSH,CTSS,ECM1,FABP5,FTL,GPX1,HADHA,HADHB,HSD17B4,IL1B,INSIG1,LCN2,LTF,MID1IP1,NDUFC2,NME1,Orm1 (includes others),PLTP,RARA,S100A4,S100A8,TK1,TXN,Ugt1a7c,VCAN
azithromycin		chemical drug		1	bias	0.0207	Ccl2,IL1B,MMP9,TREM1
POLR3G		enzyme		0		0.0207	AURKA,LMNA,S100A4,TP53
JUP		other				0.0207	DPAGT1,MYC,NME1,NME2
DDB2		other				0.0207	BAX,CDKN1A,MMP9,TP53
NUMBL		other		-1.154	bias	0.0207	CDKN1A,KLF4,MMP9,MYC
CDH5		other				0.0207	BIRC5,CDKN1A,ICAM1,TP53
EPCAM		other		0.022	bias	0.0207	CDKN1A,FABP5,MYC,TP53
KRIT1		other		0.152		0.0207	CXCR4,JUN,KLF4,THBS1
IREB2		translation regulator		-1		0.0207	ACO2,FTL,SDHB,TP53
ELN		other				0.0207	FN1,IL1B,MMP9,NCF1
CXCL1		cytokine		-0.283	bias	0.0207	Ccl2,CXCR2,ICAM1,IL1B
LY-2510924		biologic drug		-1		0.0207	CD14,MS4A3,RPL23,TREM1
quinacrine		chemical drug				0.0207	BAX,BIRC5,CDKN1A,TP53
putrescine		chemical - endogenous mammalian		1	bias	0.0207	CDKN1A,JUN,MAT2A,TP53
tetrathiomolybdate		chemical drug	Activated	2	bias	0.0207	ITGAM,MMP9,SOD1,VCAM1
androstenediol		chemical - endogenous mammalian				0.0207	BAX,CDKN1A,DDB1,NFKB1
dexamethasone phosphate		chemical drug		0		0.0209	BCL6,CXCR4,DUSP1,IL1B,Mt1,THBS1
IL17A		cytokine		-1.431	bias	0.0209	BIRC5,C3,CAMP,Ccl2,CD14,CD40,CD68,CEBPD,CXCR4,ECHS1,FAS,GADD45A,Gm21596/Hmgb1,GUSB,ICAM1,IL16,IL1B,IL1RN,JUN,LCN2,MAP3K1,MMP8,MMP9,MYC,NRP1,PLXNB2,S100A8,S100A9,TNFRSF14,TNFRSF1B,VCAM1,YWHAG
Fus		transcription regulator				0.0209	BPHL,Ewsr1,HIST1H1C,HIST1H2BI,PMM2,SNRPB
paraquat		chemical toxicant		0.085	bias	0.0212	BAX,BID,CAT,CEBPD,CYBB,FAS,FN1,GPX1,GSTP1,INHBA,ITGAM,LAMP2,MMP8,MMP9,Mt1,PLTP,SOD1,TXN
SRC (family)		group		0.8	bias	0.0213	ATP1A1,Ccl2,EGR1,FGR,FN1,ICAM1,PROM1,PXN,S100A4,VCAM1
STAT2		transcription regulator	Activated	2.236	bias	0.0213	Ccl2,CD40,IFI35,IFITM2,IRF5,Mx1,OAS1,PSMB8,ST13,WARS
KLF2		transcription regulator		1.612		0.0213	ADAM15,ASS1,Ccl2,CCND3,CD40,CD55,CDKN1A,CNP,CX3CR1,CXCR4,ECM1,FGR,GADD45A,GLUD1,HPSE,IL1B,ITGB7,JUNB,MVP,MYC,PROS1,THBS1,VCAM1
NOD2		other		-0.613	bias	0.0216	ACSL1,ARL5C,CAMP,CD40,CLEC4E,CLEC5A,ICAM1,IL1B,ITGAM,LMO4,MARCKSL1,NFKB1,NFKB2
TFAP2C		transcription regulator		0.728		0.0216	Ccl9,CD44,CDKN1A,FKBP4,GPX1,HIST1H1C,MMP9,MYC,NRP1,RARA,THBS1,TK1,XBP1
cyclophosphamide		chemical drug		-0.266	bias	0.0216	ATF3,CASP8,CAT,CD44,FAS,IL1B,IL1R2,LGALS3,Ly6a (includes others),MYC,PSMB8,RBM3,THBS1
(6)-gingerol		chemical - endogenous non-mammalian				0.0217	CDK4,CDKN1A,TP53
recombinant human endostatin		chemical drug				0.0217	FAS,JUN,MAP1LC3B
AKIRIN2		other				0.0217	DUSP1,MMP9,MYC
SLC5A8		transporter				0.0217	BAX,BIRC5,TP53
ZNF746		transcription regulator				0.0217	COX4I1,PDHA1,SDHA
SFRP5		transmembrane receptor				0.0217	Ccl2,CXCR4,IL1B
SNHG20		other				0.0217	CDKN1A,VIM,ZEB2
APC (complex)		complex				0.0217	CCNB1,PLK1,UBE2C
TRPV2		ion channel				0.0217	CASP8,FAS,RAF1
CCNA2	0.634	other				0.0217	CCNA2,CDKN1A,PCNA
mir-634		microRNA				0.0217	APIP,BIRC5,LAMP2
PDE3A		enzyme				0.0217	CDKN1A,DUSP1,TP53
TSC22D1		transcription regulator				0.0217	FN1,IL1B,TP53
CTSE	-0.252	peptidase				0.0217	CD40,CTSB,IL1B
CKS1B	0.836	kinase				0.0217	CCNA2,CCNB1,CKS1B
ISG15	-0.262	other				0.0217	Ifi202b,IFITM3,OAS1
CUL7		other				0.0217	BIRC5,TP53,VIM
PPM1A		phosphatase				0.0217	CDKN1A,ITGB1,TP53
CHGA		other				0.0217	BIRC5,HSPA5,IL1B
MS4A1		other				0.0217	BAX,MYC,ZFP36L1
SLC19A1		transporter				0.0217	Ly6a (includes others),PSMB8,SKP1
15-E2-isoketal modified phosphatidylethanolamine		chemical reagent				0.0217	HSPA5,ICAM1,VCAM1
rabeprazole		chemical drug				0.0217	Ccl2,ICAM1,IL1B
diacerein		chemical drug				0.0217	BAX,IL1B,IL6R
N-Ac-leucyl-leucyl-methioninal		chemical - protease inhibitor				0.0217	BAX,HSP90B1,TP53
FZD8		G-protein coupled receptor		1.095		0.022	BIRC5,FN1,TP53,VCAN,VIM
TFEC	0.352	transcription regulator				0.022	CSF3R,F13A1,MYH9,PSMA6,S100A9
superoxide		chemical - endogenous mammalian		0.271	bias	0.022	FN1,ICAM1,IL1B,MARCKSL1,MMP9
ellagic acid		chemical - endogenous non-mammalian		-0.447	bias	0.022	AKR1B1,BAX,CDKN1A,IL1B,SCARB1
diethylmaleate		chemical toxicant		0.277		0.022	CDKN1A,GBE1,GSTP1,MAFG,SLC3A2
lycopene		chemical drug		-0.447	bias	0.022	BAX,CCND3,CDKN1A,MMP9,TP53
Creb		group		0.061	bias	0.0222	ALOX5,ATF3,C3AR1,CAMP,CASP1,CD14,CDKN1A,CEBPD,COMT,CSF1R,CTSB,CTSV,DCTN3,DDX39B,DUSP1,EGR1,FAS,GDA,HLA-G,IFI16,IL1B,ITGAM,JUN,JUNB,LASP1,LMO4,MALAT1,MAP2K1,MAT2A,MCM3,MIF,NDUFA3,NDUFB5,PCNA,PGK1,RNASEH2A,SOD1,TF,TFG,TSEN34,USF1
TXNIP	-0.515	other		-0.186		0.0222	BCL6,CCNA2,CDKN1A,G0S2,ICAM1,IL1B,NFKB1,PCNA,TXNIP
acetovanillone		chemical drug		1	bias	0.0222	ADIPOR1,DUSP1,GPX1,MMP9,MSR1,NCF1,OSGIN1,TXN,UCP2
CARD9		other				0.0224	C3,C5AR1,Ccl2,CCR1,CLEC4E,FCGR1A,IL1B
caspase		group		0.059	bias	0.0224	BAX,CCND3,CD14,CDK4,CDKN1A,NCF1,THBS1
TNFSF14	-0.745	cytokine		-0.994	bias	0.0224	ADAM8,Ccl2,CD40,ICAM1,INHBA,MMP9,VCAM1
bufalin		chemical reagent		-1.633		0.0224	CDK4,EGR1,HSPA5,RPLP0,YWHAG,YWHAH,YWHAQ
CP-55940		chemical reagent				0.0227	BTG2,GADD45A,JUN,JUNB,MAP2K1,MYC,RPL13A,RPS9
LCK		kinase	Inhibited	-2.158		0.0227	ANXA1,CCNA2,EGR1,ITGAL,ITGB2,JUN,MMP9,SCARB1
APR-246		chemical drug				0.0227	BAX,CD81,PEA15,RANGAP1,SEPT5,SHISA5,XBP1,YWHAG
Pro-inflammatory Cytokine		group		0.053	bias	0.0235	AKR1B1,ASS1,CD55,HP,HSPA5,ICAM1,ITGA1,LCN2,LGALS1,MMP9,S100A1,VCAM1
fatty acid		chemical - endogenous mammalian		1.068	bias	0.0235	ACADL,ATP5F1C,BAX,Ccl2,DGAT1,H2AFY,HSPA5,IL1B,ITGAM,MMP9,NDUFB6,NFKBIB,PPA1,S100A8,ST3GAL5,UCP2,VCAM1
captopril		chemical drug		0.612		0.0239	ANXA1,BIRC5,CD44,IL1RN,LCN2,LGALS3,MCM3,MMP9,Ms4a6b,PSMB8,RBM3,S100A10,Tpm1
miR-133a-3p (and other miRNAs w/seed UUGGUCC)		mature microRNA		0.34	bias	0.0241	ARHGDIA,CDCA8,CMTM6,CORO1C,CPNE3,FTL,LASP1,MALAT1,NELFA,PKM
NKX3-1		transcription regulator				0.0241	BTG2,CTNNBL1,CTSB,CTSV,CTSZ,CX3CR1,MMP9,MYC,PTP4A2,SOAT1
N-nitro-L-arginine methyl ester		chemical drug		-0.562		0.0241	ATF3,BAX,Ccl2,CD68,CYBB,FAS,FN1,ICAM1,IL1B,INSIG1,MMP9,NSF,SOD1,TP53,VCAM1
ritonavir		chemical drug		-0.651		0.0245	ACAT2,ATP2B1,BIRC5,CFL1,CYP4F2,FDPS,ICAM1,IFRD1,IL1B,MMP9,MYC,NAGK,NCAPH,PNRC2,RACGAP1,RGS10,SQLE,TSC22D3,TSN,TWF2,VCAM1
C1QTNF12		other				0.0248	Ccl2,IL1B
(diaminocyclohexane)(diacetato)(dichloro)platinum		chemical reagent				0.0248	CDKN1A,TP53
benfotiamine		chemical drug				0.0248	AKR1B1,TKT
IRS		group				0.0248	DGAT1,DGAT2
diosmin		chemical drug				0.0248	BAX,TP53
TMBIM1	0.382	other				0.0248	FAS,MMP9
ZNF346		other				0.0248	BAX,CDKN1A
RFFL	-0.265	enzyme				0.0248	CDKN1A,TP53
PTPMT1		phosphatase				0.0248	CDKN1A,CDKN2D
FAM129B	0.369	transcription regulator				0.0248	MYC,PKM
BIRC6		enzyme				0.0248	BAX,TP53
EDEM1		enzyme				0.0248	HSPA5,XBP1
PYHIN1		other				0.0248	CDKN1A,TP53
NHLRC1		enzyme				0.0248	LAMP1,MAP1LC3B
CTBP1-DT		other				0.0248	CDKN1A,TP53
EPM2A		phosphatase				0.0248	LAMP1,MAP1LC3B
ADI PEG20		biologic drug				0.0248	ASS1,MYC
danusertib		chemical drug				0.0248	CCNB1,CDKN1A
YEATS4		transcription regulator				0.0248	CDKN1A,TP53
RNF144B		enzyme				0.0248	BAX,CDKN1A
TERF1		transcription regulator				0.0248	CDKN1A,TP53
SERTAD1		transcription regulator				0.0248	CDK4,SET
DAPK1		kinase				0.0248	IL1B,TP53
ELL		transcription regulator				0.0248	CDKN1A,MYC
RGS6		enzyme				0.0248	TK1,TP53
MCRS1	0.316	other				0.0248	CDKN1A,TP53
CLCN3		ion channel				0.0248	NFKB1,VCAM1
mir-431		microRNA				0.0248	FN1,VCAN
P4HB	1.066	enzyme				0.0248	PDIA3,PDIA4
ARHGAP1		other				0.0248	CDKN1A,TP53
FOXO6		transcription regulator				0.0248	CCR2,MYC
SIPA1		other				0.0248	ITGB1,MMP9
STRAP	0.457	other				0.0248	JUN,MYC
N4BP1		other				0.0248	JUN,JUNB
DDOST	1.012	enzyme				0.0248	Ccl2,PROM1
TOR2A	0.265	other				0.0248	ACAT1,MYC
TRAF7		enzyme				0.0248	JUN,MYC
ZNF350		transcription regulator				0.0248	GADD45A,MMP9
PDZD2		other				0.0248	CDKN1A,TP53
Defb2		other				0.0248	Cd24a,CD40
CCNL2		other				0.0248	BAX,TP53
BLM		enzyme				0.0248	CDKN1A,TP53
TUBB1		other				0.0248	TUBB,TUBB2A
AP2A2	0.3	transporter				0.0248	BAX,CDKN1A
ELOA		transcription regulator				0.0248	ATF3,CDKN1A
INHBC		growth factor				0.0248	INHBA,JUNB
RACGAP1	0.562	transporter				0.0248	CD14,CDKN1A
BUB3	0.431	other				0.0248	CDKN1A,TP53
HSPH1		other				0.0248	BCL6,MYC
ANP32A		other				0.0248	COX7A2L,TK1
TOP2A	0.402	enzyme				0.0248	MYC,TOP2A
RPL23A		other				0.0248	CCNA2,MYC
GIMAP1-GIMAP5		other				0.0248	HSP90B1,HSPD1
BUB1B		kinase				0.0248	CDC20,PTTG1
(+)-R-3-(4-chlorophenyl)-3-(1-hydroxymethylcyclopropylmethoxy)-2-(4-nitrobenzyl)-2,3-dihydroisoindol-1-one		chemical reagent				0.0248	CDKN1A,TP53
UIMC1		other				0.0248	BAX,CDKN1A
4-ethylsulfanylphenylmethylene hydantoin		chemical reagent				0.0248	CD44,ITGB1
4-hydroxyphenylmethylene hydantoin		chemical reagent				0.0248	CD44,ITGB1
O-(chloroacetylcarbamoyl)fumagillol		chemical drug				0.0248	CDKN1A,TP53
atipamezole		chemical drug				0.0248	EGR1,JUNB
methacholine		chemical drug				0.0248	FN1,SLPI
cibacron blue F 3GA		chemical reagent				0.0248	SLC29A1,THBS1
bongkrekic acid		chemical toxicant				0.0248	CYCS,VCAM1
chlordecone		chemical toxicant				0.0248	HSPA5,LTF
minodronate		chemical drug				0.0248	CXCR4,ICAM1
ofloxacin		chemical drug				0.0248	BAX,CDKN1A
ropivacaine		chemical drug				0.0248	ITGAM,VDAC2
ethyl gallate		chemical - endogenous non-mammalian				0.0248	ICAM1,VCAM1
taprostene		chemical reagent				0.0248	DUSP1,TSC22D3
mycophenolate mofetil		chemical drug				0.0248	FN1,ICAM1
lead nitrate		chemical toxicant				0.0248	BAX,GSTP1
ellipticine		chemical reagent				0.0248	CD40,IL1B
glyphosate		chemical toxicant				0.0248	S100A9,SOD1
2-amino-3-phosphonopropionic acid		chemical - endogenous mammalian				0.0248	EGR1,JUNB
raffinose		chemical - endogenous mammalian				0.0248	AKR1B1,ICAM1
Mn2+		chemical - endogenous mammalian				0.0248	ATP13A2,ICAM1
CBX5		transcription regulator		0.316	bias	0.0249	ANKRD22,BIRC5,C15orf48,CD68,CDKN1A,CEACAM1,EIF1AY,HIST1H1C,HIST2H2AA3/HIST2H2AA4,LCN2,OAS1,PSMB8,SELENBP1,SLC2A3,SLC7A7,TACSTD2,TGFBI,TXNIP
dibutyl phthalate		chemical toxicant		0.59		0.0253	BID,JUN,JUNB,MYC,NFKB1,SCARB1
CXCL10		cytokine		-1.114	bias	0.0253	Ccl2,Ccl6,CXCR2,IL1B,ITGA1,MMP9
FLI1		transcription regulator	Activated	2.435	bias	0.0253	Ccl2,CCND3,CSF1R,EGR1,HSPA8,NEU1,NPM1,POLR1D,RPL18,SNRPB,TCP1
miR-24-3p (and other miRNAs w/seed GGCUCAG)		mature microRNA	Inhibited	-2.412	bias	0.0253	AURKB,BAX,CCNA2,CDK4,FEN1,MYC
HEXIM1		transcription regulator				0.0253	ANXA1,CDKN1A,PTBP1,Tmsb4x (includes others),TP53,VIM
NFKBIZ	-0.451	transcription regulator		-1.36	bias	0.0253	Ccl2,CEBPD,IL36G,LCN2,S100A8,S100A9
NRIP1		transcription regulator	Inhibited	-2.522	bias	0.0253	ACAA2,ACO2,CCNB2,CDKN1A,HADHB,IDH3A,IL1B,PYGL,SDHB,SLC16A10,TK1
BTG2	-0.774	transcription regulator		1.528		0.0253	BTG2,CAT,IL1B,NCAM1,RARA,SOD1
SSTR2		G-protein coupled receptor		-0.728		0.0253	HDC,MMP9,PYGL,THBS1,TNFRSF1A,VIM
ochratoxin A		chemical toxicant	Inhibited	-2.195		0.0253	BAX,FAS,GSTM5,GSTP1,HDAC3,MMP9
KN-62		chemical - kinase inhibitor		0	bias	0.0253	ATF3,EGR1,IL1B,MMP9,PPP1R15A,VCAM1
amitriptyline		chemical drug		0.816	bias	0.0253	ASAH1,CASP1,CDKN1A,SLC2A3,TP53,WIPI1
piceatannol		chemical - endogenous non-mammalian		-0.063		0.0253	BCL6,FAS,ICAM1,IL1B,MMP9,MYC
TNFAIP3		enzyme		0.739	bias	0.0254	BAX,BIRC5,Ccl2,FAS,ICAM1,IL1B,MMP9,NLRP3,VCAM1
SERPINA1		other				0.0254	DERL1,HSP90B1,HSPA5,IL1RN,NFKB1,PDIA3,SCARB1,VCP,XBP1
mir-1		microRNA		-1.525	bias	0.0255	ADPGK,CAP1,CAPRIN1,DHX15,FN1,H3F3A/H3F3B,HSP90B1,HSPD1,LASP1,MMP9,PDCD4,PPIB,RHEB,SEC61A1,TAGLN2,UNC119B,ZFP36L1
ATP7B		transporter		0		0.0262	CDC20,CKS1B,FABP5,FDPS,HIST1H1C,Mt1,PTTG1,SQLE
TFAP4		transcription regulator		0		0.0262	CD44,CDKN1A,CLDN1,EGR1,FN1,STEAP3,TSPAN31,VIM
NFYC		transcription regulator				0.0262	CCNB1,CCNB2,CDCA8,CSDE1,PSMC6,PTTG1,RFC3,TXNDC12
TNFRSF9		transmembrane receptor		0.563		0.0262	BIRC5,CD14,CD40,FAS,HLA-DQB1,IL1B,ITGAM,MMP9
daidzein		chemical drug		-0.258		0.0263	AIF1,BAX,C16orf54,EVI2A,HCST,HLA-A,HLA-DQA1,ITGB2,LAPTM5,LY86,MAP4K1,MYC,OGDH,TP53,ZEB2
PRKCZ		kinase		-1.813	bias	0.0264	BAX,JUN,MMP9,MYC,PHGDH,PSAT1,VCAM1
NOSTRIN		transcription regulator		-1.331	bias	0.0264	ANXA5,Ccl2,FN1,MMP9,NFKB1,SOD1,THBS1
N-(3-(aminomethyl)benzyl)acetamidine		chemical reagent				0.0264	BAX,BIRC5,CASP1,CKAP4,FAS,MMP9,TNFRSF1B
delta-9-tetrahydrocannabinol		chemical drug		0.956		0.0264	BID,CASP8,CXCR4,DHX15,HIST1H2BI,IL1B,LSM7,LTF,NUBP2,PRDX2,RPS9,Tnfsf9,TP53
IFNL1		cytokine		1.867	bias	0.0265	ATF3,CD40,DDX60,IFI35,IFITM2,IFITM3,LGALS3BP,MLKL,OAS1,OAS3,PHF11,PLSCR1,PSMB9,TRIM14
MAPK3	-0.251	kinase		-0.998	bias	0.0265	CDKN1A,EGR1,FN1,HDC,HLA-DQB1,ITGB1,JUN,JUNB,LEPROT,MMP9,MYC,PLAUR,SOD1,THBS1
FGF2		growth factor		1.193	bias	0.0266	AKR1B1,BAX,BCL6,BIRC5,BTG2,CAPZA2,Ccl2,CCND3,CDKN1A,CNP,CXCR4,DAD1,EGR1,ENO1,FAS,FN1,FRRS1,GADD45A,Gm21596/Hmgb1,HPSE,ICAM1,IL1B,INHBA,ITGA1,ITGB1,JUN,JUNB,LMNA,MIF,MMP9,MYC,PCNA,PGK1,PLAUR,PLXDC1,PRKCD,Ptma (includes others),PTTG1,RAF1,S100A10,S100A4,S100A8,STOM,TF,THBS1,Tmsb4x (includes others),TOP2A,TP53,VCAM1,VIM
MAP3K8		kinase		-0.888		0.0271	Ccl2,CCR1,CCR2,Cd33,CEBPD,DNAJA2,FAM107B,GCA,HP,IFNGR1,IL1B,INHBA,JUN,JUNB,MMP9,NFAM1,Rpl22l1,SESN1,SLFN12L,STK17B,TXNIP,UBE2B
L-methionine		chemical - endogenous mammalian		1.981		0.0272	AURKB,CCNB1,CCNB2,CDCA8,EEF1A1,EEF1D,HSPA5,IFI16,MAT2A,TOP2A
SHC1		other		1.107		0.0272	BAX,CDKN1A,EGR1,FTL,GDA,GSTP1,ICAM1,ITGAM,PCNA,TXN
chloroquine		chemical drug		0.249		0.0272	ATP1A1,CD40,CTSD,GRN,IL1B,MAP1LC3B,NT5E,TNFSF13B,TXN,VRK1
actinomycin D		chemical drug		1.193	bias	0.0273	ASS1,ATP1A1,BAX,BIRC5,CASP1,CD55,CDKN1A,DUSP1,FAS,FEN1,FN1,FPR1,GADD45A,GDA,GPI,GSTM5,GSTP1,IFNGR1,IL1R2,JUN,LTB4R,Mt1,MYC,NPM1,OSM,PLAUR,PXN,SLC40A1,TF,TNFRSF1B,TP53,UBE2B
tacrolimus		chemical drug		-1.149		0.0274	BATF,BAX,CAPG,Ccl2,CD48,CD74,CDK4,CFP,CTSV,CXCR4,CYBB,EGR1,F5,FN1,Gm16894,HSPD1,IL16,IL1B,IL1R2,ITGB7,JUN,JUNB,MARCKSL1,MYC,NME1,NRP1,NT5E,PA2G4,PDCD4,PDLIM4,PROM1,TNFRSF1B,WLS
rituximab		biologic drug		0.882	bias	0.0276	BAX,CDKN1A,FAS,PEBP1,TP53
CHEK1		kinase		-0.687		0.0276	CDKN1A,H2AFX,MYC,PCNA,TP53
NUMB	-0.537	other		-1.067		0.0276	CCNB1,CDKN1A,IFI16,PROM1,TP53
TMBIM6	-0.335	other		-0.411		0.0276	EIF2A,HSPA5,MAP1LC3B,SEC61A1,XBP1
PARP9		enzyme		1.109	bias	0.0276	BCL6,CD74,HLA-DQA1,HLA-DQB1,HLA-E
CCR2	1.588	G-protein coupled receptor		0.094		0.0276	Ccl2,Ccl6,Ccl9,CCR1,CCR2,CD40,CXCR4,F13A1,FN1,IL1B,ITGAL,MMP9,PLOD3,SLPI,TGFBI,THBS1,VCAN
thioridazine		chemical drug		0.447		0.0276	CDK4,CDKN1A,SLC2A3,TP53,WIPI1
resatorvid		chemical drug		1.131	bias	0.0278	CAT,Ccl2,IL1B,SCARB1
Mmp		group		-0.152		0.0278	CSF1R,FAS,ITGAM,MMP9
trypsin		group		1.067	bias	0.0278	CDKN1A,ICAM1,MIF,PCNA
PTBP1	0.589	enzyme		-0.107		0.0278	CD44,CDKN2D,MYC,PKM
mir-127		microRNA		0.072		0.0278	BCL6,CLEC10A,DUSP1,IL1B
TLE1		transcription regulator				0.0278	ATF3,DUSP1,EGR1,NUPR1
B4GALNT1	0.427	enzyme				0.0278	C3,C3AR1,C5AR1,IL1B
AK1		kinase				0.0278	ACADL,ENO1,GLUD1,PKM
PLA2G2E		enzyme				0.0278	ADAM8,CAMP,IL1B,S100A9
PON1		phosphatase				0.0278	CD68,ICAM1,MSR1,SCARB1
HSPA1A/HSPA1B	0.834	enzyme		0.784	bias	0.0278	CDKN1A,Hspa1b,IL1B,XBP1
RV 538		chemical reagent		-1	bias	0.0278	ATP13A2,ICAM1,IL1B,LAMP2
cyclomaltodextrin		chemical drug		-0.283		0.0278	IL1B,MMP8,S100A8,SCARB1
Ins1		other		1.684		0.0281	ADIPOR1,AP2M1,ATP1A1,BCKDHA,CCND3,CDKN1A,CEBPD,COX7A2,DGAT2,ECI1,EGR1,ERCC1,ERP29,GDI2,GSTP1,HNRNPK,HP,HSD17B4,IL1B,IMPDH2,JUN,JUNB,LGALS3BP,MIF,Mt1,MYC,NDUFB9,PCNA,PDHB,PPIB,RETSAT,RPS14,RRM1,SDHB,TF,TK1,UQCRC1,UQCRC2,VAMP5,VIM
CIP2A		other		0.102		0.0283	CFB,EBI3,GADD45A,GPR183,LASP1,LXN,MYC,PDE2A,PDLIM7,PLAUR,SLC25A4
IL6ST		transmembrane receptor		1.219	bias	0.0283	CSF1R,EGR1,HP,IL6R,JUN,JUNB,LTF,MYC,TNFRSF1A,TNFRSF1B,VCAM1
Hif1		complex		0.391	bias	0.0283	BIRC5,CXCR4,ENO1,FN1,LGALS1,PFKL,PGK1,PPP5C,S100A8,SLC16A3,VASP
trinitrobenzenesulfonic acid		chemical reagent		-1.681	bias	0.0287	ADAM8,Ccl2,Ccl9,CCR1,CD44,CD68,CLDN1,CLEC4E,IL1B,IL1R2,ITGAM,LCN2,MMP9,S100A8,S100A9
ADRA1B		G-protein coupled receptor				0.0288	CDKN1A,CEBPD,CTSV,DUSP1,EGR1,FABP5,FN1,JUN,TMPO
OLR1		transmembrane receptor		-0.517	bias	0.0288	CD68,CXCR2,CYBB,FN1,ICAM1,ITGAM,NCF1,RARA,VCAM1
TLR3		transmembrane receptor		0.153	bias	0.0288	ARG2,ATF3,C3,Ccl2,CD40,CFB,DUSP1,FAS,GLRX3,ICAM1,IFI16,Ifi202b,Ifi47,IFNAR1,IL1B,IL1R2,IL1RN,JUNB,Klrk1,LCN2,LIPA,Mx1,NFKB1,OAS1,PPP1CA,S100A8,SLPI,Stfa2/Stfa2l1,TNFRSF1A,TNFRSF1B,TNFSF13B,TREM1,TREML2,WDR92
Nr1h		group		0.835		0.0289	ACADL,ARG2,C3,Ccl2,CCR2,CD40,CLEC4E,ECE1,EDNRA,IL1B,ITGAL,LAT2,LTB,MARCKSL1,NFKB2,NLRP3,PLTP,SCARB1,Slfn1,SLFN12L,THBS1,TP53
LYN		kinase		1.4		0.029	BIRC5,C5AR1,Ccl2,Ccl9,CCNA2,CD40,CDKN1A,CYCS,EGR1,IL1B,MYC,NFKB1,NFKB2,TNFRSF14
MMP9	-2.643	peptidase		0.773		0.0291	Acp5,Ccl2,CD44,CD68,CDKN1A,CTSB,CXCR4,GADD45A,ICAM1,ITGB1,MMP9,MYC,VIM
EGLN		group		-0.262	bias	0.0296	BCKDHA,Ccl2,DDX41,EGLN2,FTL,GPI,GYS1,HLA-DQB1,LCN2,MIF,Orm1 (includes others),OSM,PFKL,PGK1,PRSS57,PYGL,RNASE4,S100A9,SELENBP1,SLC16A3,Tnfsf9,TPI1,VKORC1
miR-30c-5p (and other miRNAs w/seed GUAAACA)		mature microRNA		-1.558	bias	0.0298	ADPGK,BCL6,HNRNPM,IDH1,IFRD1,JUN,MAT2A,MBNL1,NT5E,NUCB1,PNP,SLC9A3R2,STX7,TMED10,TMED2,TP53,UBE2I
docosahexaenoic acid		chemical drug		0.314		0.0302	BAX,BID,CASP8,Ccl2,CD40,CD44,CDKN1A,CXCR4,CYCS,DPYSL2,EIF2A,FAS,IL1B,MMP9,MYC,NFKB1,PLTP,RAF1,SORL1,THBS1,TNFRSF1A,TNFRSF1B,UCP2,VCAM1
AHI1		other		0.816		0.0304	BIN1,CMTM7,IL1RN,LAPTM5,NKG7,PDCD6
NCL		other		-0.277		0.0304	CDKN1A,HSPA1A/HSPA1B,ILF3,MYC,PDCD4,TP53
Mt1	0.368	other		-1.067	bias	0.0304	ATF3,GSTP1,IL1B,JUN,Mt1,MYC
diazoxide		chemical drug		-0.509		0.0304	BAX,CYCS,EGR1,MYC,SLC39A7,UCP2
arotinoid acid		chemical toxicant		0.662	bias	0.0304	ALDH9A1,CDKN1A,DUSP1,PLTP,RARA,TK1
tripterine		chemical - endogenous non-mammalian		1.637		0.0304	GBA,HDAC3,HSPA1A/HSPA1B,IL1B,TCP1,VCAM1
MOG		other		-0.655	bias	0.0305	C5AR1,Ccl2,CCR1,CCR2,CD40,CD44,ICAM1,ITGAL,MMP9,VCAM1
CAT	0.592	enzyme	Inhibited	-2.038	bias	0.0305	BAX,Ccl2,CDKN1A,FN1,HSPA4,MMP9,THBS1,TP53,VCAM1,VIM
anisomycin		chemical - endogenous non-mammalian		-0.471		0.0305	ATF3,CDKN1A,CYBB,DUSP1,EGR1,HDAC1,HSPA5,JUN,JUNB,PLAUR
NPPB		other		-1.455	bias	0.0309	ACAT2,BAX,CASP1,EBP,FN1,IL1B,SCARB1
PLAT		peptidase		0.514	bias	0.0309	FN1,IL1B,INHBA,JUN,MMP9,MVP,MYC
TIMP1		cytokine		-1.89		0.0309	CD40,CD44,CDKN1A,MMP9,PLAUR,PLTP,TP53
tetrachlorodibenzodioxin		chemical toxicant		0.155		0.031	ACTL6A,AKR1A1,ALOX5,ATP2B1,BAX,BTG1,CCNA2,Cd52,CDKN1A,CDKN2D,COMT,CTSD,CTSV,EMP3,FAS,GHITM,Gm21596/Hmgb1,HDAC1,HDAC3,HSPA1A/HSPA1B,HSPA8,IDH1,IL10RA,IL1B,ITGAL,ITGB7,JUN,LYST,MANF,MYC,NME1,PCNA,POMP,Rpl29 (includes others),S100A4,S100A8,S100A9,SESN1,SLC16A10,SLC25A5,SLC2A3,SLC40A1,SOD1,TK1,TP53,TUBA8,TXN
ERBB4		kinase	Activated	3.212		0.0316	ADAM9,BTG2,CDKN1A,DUSP1,EGR1,GADD45A,GPAA1,JUN,MYC,PGK1,SLPI,THBS1,Tmsb4x (includes others),TP53
nocodazole		chemical reagent		1.633		0.0316	AURKA,CCNB1,CDK4,CDKN1A,CDKN3,MAP2K1,MAP4K1,MAP4K2,PLK1,PPP1CA,PPP5C,RAF1,TP53,UHRF1
linoleic acid		chemical - endogenous mammalian		-0.823		0.0319	Ccl2,CYP4F2,DUSP1,HSP90B1,HSPA5,ICAM1,IL1B,NCF1,S100A8,S100A9,UCP2,VCAM1
budesonide		chemical drug		0.748		0.0319	Ccl2,CDKN1A,CKS1B,CXCR2,ITGAM,JUN,MAFG,MAP2K1,PCNA,PDCD6,PDLIM1,RAE1,TSC22D3
ETS2		transcription regulator		1.6	bias	0.0319	CDKN1A,CSF1R,CYP27A1,HPSE,ICAM1,JUN,JUNB,MMP9,MSR1,MYC,RAF1,TFEC
apigenin		chemical - endogenous non-mammalian		1.054	bias	0.0319	BAX,CASP8,Ccl2,CDK4,CDKN1A,DGAT2,HDAC1,ICAM1,IL1B,MMP8,MMP9,TP53,VCAM1
dehydroisoandrosterone		chemical - endogenous mammalian		-0.066		0.0319	B2M,Ccl2,CCR2,ECM1,HADHA,HSD11B1,HSP90AB1,ICAM1,LGALS3,MYC,TNFRSF1A,TP53,VCAM1
LEPR		transmembrane receptor		-1.429		0.032	ADAM8,ANXA5,BTG1,CASP8,Ccl2,CD63,CD68,DNAJC7,EIF3A,FN1,H2AFV,IL18BP,IL1R2,IL1RN,ITGAM,LCN2,LGMN,PSMB8,SCARB1,STK17B,STUB1,TPRA1,TSC22D3,UCP2
ganglioside GM3		chemical - endogenous mammalian				0.0323	CD40,ICAM1,VCAM1
N-Cadherin		group				0.0323	CDKN1A,MMP9,VCAM1
meldonium		chemical drug				0.0323	DGAT1,GOT2,HADHA
6-amino-4-(4-phenoxyphenylethylamino)quinazoline		chemical reagent				0.0323	C3,ITGB1,MMP9
rhodamine 6G		chemical toxicant				0.0323	CCNB2,CCND3,PCNA
Ginkgo biloba		chemical drug				0.0323	IL1B,PCNA,TP53
citrinin		chemical toxicant				0.0323	JUNB,KDM6B,TP53
carfilzomib		biologic drug				0.0323	ATF3,EIF2A,HSP90B1
MFN2		enzyme				0.0323	BAX,PPP1R15A,XBP1
ADGRF5		G-protein coupled receptor				0.0323	Ccl2,IL1RN,MMP9
evofosfamide		chemical drug				0.0323	CCND3,CDK4,CDKN1A
FANCA		other				0.0323	CDKN1A,EGR1,IL1B
CBX1	0.333	transcription regulator				0.0323	BIRC5,CDKN1A,PROS1
HBP1	-0.382	transcription regulator				0.0323	CDKN1A,CTSB,H1F0
LINC-ROR		other				0.0323	CDKN1A,FAS,TP53
PTCSC3		other				0.0323	MMP9,MYC,S100A4
KSR1		kinase				0.0323	MYC,TP53,Tpm1
ERRFI1		other				0.0323	H2AFX,IL1B,NFKB1
CLTC		other				0.0323	CD74,CDKN1A,HLA-A
RASSF10		other				0.0323	CASP8,JUN,PCNA
TERF2		transcription regulator				0.0323	CDKN1A,MIF,TP53
CCX771		chemical reagent				0.0323	CD44,CXCR4,ITGB1
ethyl 2-{[(6,7-dimethyl-3-oxo-1,2,3,4-tetrahydro-2-quinoxalinyl)acetyl]amino}-4,5-dimethyl-3-thiophenecarboxylate		chemical reagent				0.0323	BAX,CDKN1A,TP53
GADD45GIP1		other				0.0323	CLPP,DNAJA3,HSPD1
PCBP1	0.3	translation regulator				0.0323	CD44,INHBA,MYC
R59949		chemical - kinase inhibitor				0.0323	CCND3,MYC,RAF1
mechlorethamine		chemical drug				0.0323	ATF3,CD40,IL1B
benzoic acid		chemical - endogenous mammalian				0.0323	CD68,IL1B,ITGAM
acrylamide		chemical toxicant				0.0323	JUN,NCAM1,TP53
acetic acid		chemical - endogenous mammalian				0.0323	EGR1,JUN,JUNB
AGI-1067		chemical drug				0.0323	EGR1,IL1B,VCAM1
aplidine		biologic drug				0.0323	DUSP1,JUN,JUNB
TOB1		transcription regulator	Inhibited	-3		0.0326	CCNA2,CDKN1A,CDT1,GMNN,MIS18A,PLAC8,SNRK,TP53,TTC5
miR-155-5p (miRNAs w/seed UAAUGCU)		mature microRNA	Inhibited	-2.19	bias	0.0335	ARL10,ATG3,ATP6V1C1,CASP1,Ccl2,CDK5RAP3,CLDN1,CSF1R,DNAJC19,DPP7,HSD17B12,IL13RA1,IL1B,MAFB,NARS,NT5E,PPP5C,RAB6A,RHEB,TACSTD2,TBCA,TRAM1,TXNDC12
celecoxib		chemical drug		-0.015		0.0336	ALOX5,BAX,BFAR,BIRC5,CD68,CDKN1A,FAS,GADD45A,HSPA5,ICAM1,IL1B,MMP9,PCNA,RAF1,SLC25A4,TNFRSF1B,TP53,VCAM1
puromycin		chemical - endogenous non-mammalian		1.067		0.034	CD40,HSPA5,IL1B,IPO7,RBM3
LIN28A	-0.501	other		1.4	bias	0.034	CDC20,CDKN1A,H2AFX,HNRNPF,LIN28A
CYB5R4	-0.308	enzyme	Inhibited	-2.219	bias	0.034	ATF3,EIF2S1,HSPA5,Mt1,XBP1
STAP2		other		0.152	bias	0.034	CCR1,CCR2,CXCR2,CXCR4,MYC
SP100		transcription regulator				0.034	CD14,CDKN1A,HSPA8,HSPE1,ICAM1
MLX		transcription regulator		-0.152	bias	0.034	Ccl2,IL1RN,LGALS3BP,MID1IP1,TXNIP
TFAM		transcription regulator		1.342	bias	0.034	ACADL,ECHS1,FABP5,IL1B,PGK1
HOXA5		transcription regulator		0.664	bias	0.034	CDKN1A,EGR1,IER2,KLF10,TP53
HRG		other		0.447	bias	0.034	Ccl6,CD74,CXCR4,FCGR1A,HLA-DQA1
PPP1R15A	0.416	other				0.034	EIF2S1,GADD45A,HSPA5,MAP1LC3B,XBP1
ammonium chloride		chemical drug		1.387	bias	0.034	ATP1A1,CD9,CTSB,GRN,IL1B
zymosan A		chemical - endogenous non-mammalian		-0.625	bias	0.034	ANXA1,Ccl2,CD40,FAS,IL1B
S-(2,3-bispalmitoyloxypropyl)-cysteine-GDPKHPKSF		chemical reagent		0.728	bias	0.034	CAMP,CD40,ICAM1,MMP9,SLC40A1
betaine		chemical - endogenous mammalian		0.762	bias	0.034	ATP5PB,B2M,COX5A,HSPA5,UQCRC2
THPO		cytokine		-1.323	bias	0.0341	AURKA,AURKB,BAX,BIRC5,CCNA2,CCNB1,CCND3,CD44,MYC,VPS72
KLF5		transcription regulator		-0.698	bias	0.0341	BIRC5,CDKN1A,CDT1,CXCR4,DUSP1,MMP9,MYC,PCNA,S100A9,UCP2
ELK1		transcription regulator		-0.607	bias	0.0341	ARRB2,CCT8,CDKN1A,EGR1,ITGB1,JUN,JUNB,MMP9,NUPR1,THBS1
ESRRA		ligand-dependent nuclear receptor	Activated	2.186	bias	0.0344	ACSL1,ASAH1,ATP5F1B,CKB,CYCS,ENO1,ETFDH,HADHA,HSD17B4,IDH3A,LIPA,LTF,MIEN1,MTCH2,NDUFA1,NDUFB5,PKM,PRKCD,PSMD3,RARA,RPL19,STARD3,TOP2A,TPI1,TRA2B
nonylphenol		chemical toxicant		0.707	bias	0.0345	ATP5PO,FAS,HSPA1A/HSPA1B,IKBKB,RPN2,S100A6,SLC1A5,STK17B
fingolimod		chemical drug		-1.867	bias	0.0349	BAX,Ccl2,CCND3,CCR2,CD40,CDK4,CDKN1A,FN1,HLA-DQA1,HLA-DQB1,ICAM1,IL1B,TSPO
AGER		transmembrane receptor		-0.387		0.0351	Ccl2,CDKN1A,EGR1,FAS,ICAM1,IL1B,MMP9,S100A8,S100A9,TP53,TXNIP,VCAM1
OSCAR		other		-1.134	bias	0.0359	CCR2,CD40,CX3CR1,ICAM1,IL1RN,ITGAM,NLRP12
ALOX15		enzyme	Activated	2.007	bias	0.0359	BAX,Ccl2,FN1,ICAM1,IL1B,JUN,VCAM1
FHIT		enzyme		-0.25	bias	0.0359	CDKN1A,IPO7,MMP9,RABAC1,RAN,RANBP1,VIM
NDRG1		kinase		-0.465		0.0359	ATF3,CD82,CDK4,JUN,MAP1LC3B,PARP1,TP53
bryostatin 1		chemical drug		-0.494	bias	0.0359	CD40,CD44,CXCR4,ICAM1,IL1B,MYC,PRKCD
daunorubicin		chemical drug		-0.275		0.0359	BAX,CDKN1A,IL1B,MYC,SLC25A4,TP53,UQCRFS1
fisetin		chemical toxicant		0.115	bias	0.0359	BAX,BIRC5,ICAM1,MMP9,MYC,TP53,VIM
honokiol		chemical - endogenous non-mammalian				0.0359	BAX,CDK4,CDKN1A,ICAM1,IQGAP1,JUNB,MMP9
nystatin		chemical drug				0.0361	CD40,ICAM1,IL1B,LCN2
UTP		chemical - endogenous mammalian		0.067		0.0361	Ccl2,CD14,H2AFX,ICAM1,THBS1,VCAM1
dihydroartemisinin		chemical drug				0.0361	CDK4,CDKN1A,MMP9,MYC
TRIM37		enzyme		-0.816	bias	0.0361	CD63,CDT1,CKB,CUL1,EGR1,TP53
SURF1	0.268	enzyme	Inhibited	-2	bias	0.0361	COX4I1,NDUFA1,SDHA,VDAC1
MAC		complex		0.114	bias	0.0361	CASP8,EGR1,FN1,RGCC,THBS1,TRADD
IDH2	0.876	enzyme				0.0361	EGR1,FN1,VIM,ZEB2
TYR		enzyme		-1	bias	0.0361	CCR1,CCR2,CXCR2,CXCR4
mir-130		microRNA		-0.689	bias	0.0361	CEBPE,IRF8,KLF4,MAFB
GHRHR		G-protein coupled receptor				0.0361	CCND3,HSD11B1,IL1B,PCNA
F10	0.676	peptidase		0.065	bias	0.0361	EGR1,ICAM1,MIF,VCAM1
ibrutinib		chemical drug		0		0.0361	CD44,FAS,ITGB1,RPS6
PRDX1	1.717	enzyme				0.0361	BAX,CD9,ECM1,REL
RALA		enzyme				0.0361	CDKN1A,MMP9,PLAUR,TP53
TUG1		other		-1.987	bias	0.0361	BAX,Ccl2,CYCS,HSPA5
rimonabant		chemical drug		-0.186	bias	0.0361	FKBP1A,HSPA5,IL1B,IL1RN,MMP9,TP53
pyruvic acid		chemical - endogenous mammalian		-0.228	bias	0.0361	BAX,BIRC5,SLC2A3,TP53
gallic acid		chemical - endogenous non-mammalian		1.067	bias	0.0361	BAX,MMP9,TP53,VCAM1
arsenic		chemical toxicant		1.698		0.0361	BAX,FTL,HSP90AA1,KEAP1,LTF,Mt1
pyrimidin-2-one beta-ribofuranoside		chemical reagent				0.0361	CDKN1A,HSPA5,RASSF1,TP53
HOXA3		transcription regulator		0.333		0.0368	ALOX5,EVI2A,ITGB1,PRKCD,PRTN3,PSTPIP1,RAC2,SPATA6,TNFRSF1B
carrageenan		chemical - endogenous non-mammalian		0.249	bias	0.0368	Ccl2,EGR1,ICAM1,IL1B,JUN,JUNB,PARP1,RPS6,TRPM2
epigallocatechin-gallate		chemical drug		-0.929		0.0371	BAX,BIRC5,CASP1,CASP6,CASP8,CAT,CDKN1A,EGR1,FAS,FN1,GADD45A,GDI1,ICAM1,Ifi202b,Ifi47,IL1B,JUN,JUNB,LAMP1,MMP9,MTA3,MYC,PCNA,PDIA4,REL,RELB,TACSTD2,TP53,VCAM1,VIM
Rxr		group				0.0373	BTG2,CDKN1A,CEBPE,CTSB,CTSS,CYP4F2,EEF2,GADD45A,IL1B,INSIG1,ITGB2,KDM6B,LTF,MYC,Neat1,PLTP,PTPRO
COL18A1		other		-0.536	bias	0.0375	F10,FN1,ICAM1,ITGB2,JUN,JUNB,MAX,MYC,NRP1,PDCD5,THBS1,TNFRSF1A,TUBA1A,VDAC1
HDAC5		transcription regulator				0.038	ACADL,ACSL1,ATP5F1B,ATP5F1D,CASP8,CDKN1A,MYC,NDUFA1,PFKL,TNFRSF1A
ZAP70		kinase		1.64	bias	0.038	ANXA1,ETFA,HSP90AA1,HTATSF1,NDUFB6,RBM3,SNRNP70,SSR4,TFEC,TSC22D3
luteolin		chemical - endogenous non-mammalian		-1.501	bias	0.038	BAX,BIRC5,CDK4,FAS,ICAM1,JUN,MMP9,MTDH,MYC,TP53
hydrocortisone		chemical - endogenous mammalian		-1.228		0.0382	CAMP,CCND3,CD40,CEBPD,CXCR4,ERP29,FAS,FN1,HSD11B1,HSPD1,ICAM1,IL1B,INHBA,ITGAM,LY75,Mt1,NDUFA6,S100A8,TP53,TUBB
cobalt chloride		chemical reagent		-0.547	bias	0.0382	ADORA2B,CDKN1A,CXCR4,DUSP1,HSP90AB1,PGK1,PKM,PLAUR,PROM1,SLC40A1,SORL1,TP53,VDAC1
heparin		chemical - endogenous mammalian		1.201		0.0385	ACADL,ATP5F1A,CD40,CS,DUSP1,FN1,HPSE,ICAM1,MMP9,NDUFA9,SDHA,VIM
NEUROG1		transcription regulator	Activated	2.111		0.0385	ASS1,C3,CD82,CFH,FN1,INHBA,LCP1,MARC2,MMP9,S100A4,THBS1
entinostat		chemical drug		0.397		0.0385	BAX,BIRC5,CDKN1A,DUSP1,GSN,H2AFX,ITGAM,MMP9,OLFM4,PCNA,TXN
MMP3		peptidase		-0.194		0.0386	CAPRIN1,DDX39A,EFTUD2,EGR1,Hnrnpa1,IL1B,MMP9,NUDT21,PPIL1,PSMA6,SF3A3,SRSF3,TENT2,THOC6,TRA2B,VIM
DNMT3A		enzyme		-0.169		0.0387	ABCD1,CASP6,CSF1R,CXCR4,CYBB,CYSLTR1,EDNRA,GRINA,IRF5,KDM6B,MAPK13,Mt1,P2RX7,PDE2A,PLA2G7,PLD4,RAP2B,S100A1
REL	0.343	transcription regulator	Activated	2.861	bias	0.0388	B2M,BIRC5,CD40,CDKN1A,CDS2,CMPK1,CTSV,DNASE1L1,FAS,FN1,HLA-A,ICAM1,IRF5,IRF8,JUN,MAFG,MINPP1,MMP9,MYC,NFKB1,NFKB2,PHGDH,POLB,PPP1R15A,PYCARD,REL,RELB,TBCA,TNFRSF13B,TNFSF13B,VIM
geldanamycin		chemical - endogenous non-mammalian		-0.188	bias	0.039	BAX,BIRC5,CD40,CDK4,CEBPD,CNP,H2AFX,HLA-DQA1,HSPA1A/HSPA1B,Hspa1b,HSPA5,HSPD1,IKBKB,IRF5,JUN,MYC,NLRP3,RAF1,RIPK3,SLC16A10,TP53
SUMO2	0.455	enzyme		0		0.0393	Bst2,CEACAM1,HLA-G,HSPA8,LY6E,PNP,RNASE4,TSC22D3
IRF6		transcription regulator		-1.408	bias	0.0393	CD14,CD9,FPR2,IL1B,KLF4,LCN2,NLRP3,P2RX4
chloropromazine		chemical drug				0.0393	ACAT2,CYP4F2,FDPS,IL1B,SLC2A3,SQLE,TSC22D3,WIPI1
pioglitazone		chemical drug		0.974		0.0401	BAX,CAT,Ccl2,CDK4,CDKN1A,CEBPD,COX4I1,EGR1,FN1,ICAM1,IL1B,IL1RN,ITGAM,KLF4,MMP9,NCF1,PCNA,PFKL,SCARB1,SOAT1,TNFRSF1A,TNFRSF1B,UCP2
NR5A2		ligand-dependent nuclear receptor		1.421	bias	0.0408	CDKN1A,CEBPD,GATM,HP,Hspa1b,ICAM1,IL1B,IL1RN,JUN,JUNB,Mt1,MYC,SCARB1,TNFRSF1B
BCL6	-0.513	transcription regulator		-0.673		0.041	ANXA6,BAX,BCL6,Ccl2,Ccl6,CD44,CDKN1A,CLEC10A,DNAJB11,DPYSL2,EBI3,FAS,FCGRT,GADD45A,IL13RA1,IL1B,IL6R,IRF8,JUNB,LITAF,Ly6a (includes others),MYC,NFKB1,PTPRO,TACSTD2,TNFRSF14,TP53,XBP1
Fibrinogen		complex		0.659	bias	0.0413	Ccl2,CD40,ICAM1,IL1B,ITGAM
Collagen type IV		complex		-0.447		0.0413	ITGB1,MMP9,MYC,PLAUR,THBS1
TFDP1	-0.336	transcription regulator	Activated	2	bias	0.0413	CASP8,CCND3,CDKN1A,MYC,RANBP1,STMN1,TP53
PLK1	0.485	kinase		-1.453		0.0413	BAX,CDKN1A,GMNN,IFI16,MYC,PLK1,PYCARD
SIN3B		transcription regulator				0.0413	BCL6,CDK4,KLF10,MYC,TXNIP
TNIP1		other				0.0413	CCR1,IL1B,LCN2,MMP8,S100A8,S100A9,Stfa2/Stfa2l1
andrographolide		chemical drug		1.054		0.0413	BAX,FN1,GSTP1,ICAM1,IL1B,MMP9,VCAM1
SN-38		chemical drug		0.765	bias	0.0413	BAX,CASP8,CCNB1,CDKN1A,FAS,MYC,TP53
HMGA1		transcription regulator		-1.865		0.0414	B2M,CD44,CTSC,CTSH,EGR1,GSN,IER2,INSIG1,ITGAL,JUNB,Ly6a (includes others),LY6E,MMP9,MVD,MYC,Ngp,PYCR2,RAN,RARA,RPL7A,Srgn
maslinic acid		chemical - endogenous non-mammalian		-1.342	bias	0.0416	BAX,BID,CD44,CDK4,CFL1,JUNB,PLAUR,PPM1G,PXN,THBS1,TP53,YWHAE,YWHAG
trichloroethylene		chemical toxicant		1.265		0.0422	CD63,ECE1,EGR1,GSTO1,IL13RA1,NFKB1,STOM,TNFRSF1A,TXNIP,YWHAQ
MAP2K4		kinase		1.633	bias	0.0422	ATF3,BIRC5,CD44,CDKN1A,FAS,GADD45A,JUN,PRDX1,TP53,TUBB2A
LGALS1	2.421	other		1.227	bias	0.0422	Ccl2,CCNB1,CDKN1A,FN1,HLA-G,IFNGR1,IL1B,LGALS1,LGALS3,MMP9
miR-145-5p (and other miRNAs w/seed UCCAGUU)		mature microRNA	Inhibited	-3.121	bias	0.0422	AHNAK,C11orf58,CCNA2,CDK4,EIF4E,KLF4,LAMP2,MYC,NDUFA4,SWAP70
CD14	-0.578	transmembrane receptor		1.283	bias	0.0422	Ccl2,CXCR2,ICAM1,IL10RA,IL13RA1,IL1B,ITGB1,MSR1,NFKB1,VCAM1
benzene		chemical toxicant		1.353		0.0422	CD63,CDKN1A,ECE1,EGR1,IL13RA1,NFKB1,STOM,TNFRSF1A,TXNIP,YWHAQ
CLOCK		transcription regulator		-1.134		0.0423	ADPGK,BPHL,C1QBP,ESYT1,GADD45A,GALNT11,HLA-DQB1,Hspa1b,ICAM1,IL18BP,ITM2C,JUNB,KIF20A,KLF13,MGAT2,MID1IP1,NCOA4,NDUFA3,OAS3,PA2G4,PPIF,PRDX3,RAD23A,RANGAP1,RAP2B,RSL1D1,S100a11,Smim11,SPATA6,ST3GAL5,ST6GALNAC4,THBS1,Tnfsf9
CX3CR1	1.133	G-protein coupled receptor		-0.13		0.0424	ANXA5,Ccl2,CD14,ICAM1,IL1B,MSR1
FABP4		transporter		0.801		0.0424	ACAT1,Ccl2,FABP5,IL1B,LTB4R,MSR1
TAF6	0.311	transcription regulator				0.0424	ATF3,C11orf24,CDKN1A,GADD45A,JUN,SRSF3
ferulic acid		chemical - endogenous non-mammalian		-1.342		0.0424	CAT,CDKN1A,DPYSL2,GPX1,IL1B,SOD1
Bay 11-7082		chemical - kinase inhibitor		-0.856	bias	0.0425	Ccl2,CCR2,CD44,FPR2,HAX1,HSPA5,ICAM1,IL1B,MMP9,NFKB1,S100A4
methylmercury		chemical toxicant		1.508		0.0425	BAX,CD63,ECE1,EGR1,IL13RA1,Mt1,NFKB1,STOM,TNFRSF1A,TXNIP,YWHAQ
caffeine		chemical drug		0.795		0.0425	CAT,CDKN1A,COX4I1,Cox7c,EGR1,FAM89B,JUNB,SRSF3,THBS1,TP53,VIM
SOD2		enzyme	Activated	2.073		0.0429	ACADL,ATP1A1,CAT,CCNB1,CDKN1A,GSN,IL1B,MMP8,MMP9,MYC,PTPRO,SKP1,TP53,TRIM14,UCP2
PTGER4		G-protein coupled receptor		-1.552		0.044	Ccl2,CD40,CD44,CXCR4,CYBB,EGR1,FAM49A,ICAM1,IFI16,IFI35,Ifi47,IL1B,LPAR6,MAFB,MMP9,Mx1,NCF1,OSM,PDCD4,TOR3A,ZFP36L1
sphingosine-1-phosphate		chemical - endogenous mammalian		-0.166	bias	0.0442	Ccl2,CD44,EGR1,FAS,FN1,HSD11B1,ICAM1,JUN,MMP9,NRP1,RARA,THBS1,VCAM1,VIM
FGF1		growth factor		0.685		0.0443	AKR1B1,Ccl2,CD68,CDKN1A,COX5A,EGR1,GPX1,GSTM5,GSTP1,ICAM1,IL1B,ITGAM,JUN,LTB,MYC,SERPINB1,THBS1,VCAM1
ABCB6		transporter		-1.414		0.0444	ATP5IF1,CAT,CYP20A1,CYP4F2,HMBS,PRDX2,SLC25A39,UROD
HBEGF		growth factor		-0.493	bias	0.0444	CSF1R,CXCR4,EGR1,ITGB1,MMP9,NRP1,PKM,SLC16A3
beta-carotene		chemical - endogenous mammalian		1.195	bias	0.0444	DBI,DGAT2,HSPA1A/HSPA1B,IL1B,MID1IP1,MOGAT2,Orm1 (includes others),SCARB1
4-hydroxynonenal		chemical toxicant		0.4		0.0444	AKR1B1,CCNB1,CTSB,HSPA1A/HSPA1B,ICAM1,IL1B,JUN,MMP9
U73122		chemical reagent		-0.763	bias	0.0444	DPM3,FN1,HSPA5,ICAM1,ITGAM,PCNA,VCAM1,XBP1
propylthiouracil		chemical drug				0.0447	BTG2,CCND3,CS,GSN,JUN,LGALS1,Ly6a (includes others),MGST3,NRP1,Orm1 (includes others),PROM1,SERPINB1,SLC16A10,Stfa1 (includes others),Stfa2/Stfa2l1,TUBA8
L-glutamic acid		chemical - endogenous mammalian		0.613	bias	0.0447	B2M,BAX,Ccl2,CDKN1A,EGR1,HEXA,IL1B,JUN,JUNB,MGLL,PCNA,PROK2,Slc25a1,SORL1,TOR3A,TP53
androgen		chemical drug		1.869		0.045	ADI1,BTG2,CALR,CCND3,CD44,CTNNBL1,CTSB,CTSV,CTSZ,CX3CR1,CXCR4,GSN,INHBA,ITGAM,JUN,MMP9,Mt1,MYC,PARK7,PTP4A2,SOAT1,TPT1,TRADD
sphingosylphosphocholine		chemical - endogenous mammalian				0.0451	Ccl2,ICAM1,JUN
triciribine		chemical drug				0.0451	ATF3,Ccl2,PARP1
nilotinib		chemical drug				0.0451	FN1,H2AFX,MYC
Ck2		complex				0.0451	BID,CYBB,MYC
FBXO42		other				0.0451	ICAM1,MMP9,VCAM1
FAT1		other				0.0451	IL1B,JUN,PDCD4
LRRK2		kinase				0.0451	IL1B,MAP1LC3B,MCU
AFF4		transcription regulator				0.0451	MYC,PTBP1,Tmsb4x (includes others)
MEMO1	0.28	other				0.0451	CTSD,JUN,MYC
HUWE1		transcription regulator				0.0451	CDKN1A,MYC,TP53
nicotiflorin		chemical reagent				0.0451	ICAM1,IL1B,MMP9
TRG		other				0.0451	HLA-DQB1,IL1B,NT5E
BANP		other				0.0451	BAX,CDKN1A,TP53
TNFRSF17		transmembrane receptor				0.0451	BAX,CD40,ICAM1
AGRP		other				0.0451	PSMA1,PSMA2,PSMA4
mir-224		microRNA				0.0451	API5,CDKN1A,MMP9
TWIST		group				0.0451	B4GALNT1,CDKN1A,ST3GAL5
SHOX		transcription regulator				0.0451	CCNB1,CDKN1A,TP53
PTGES3	0.464	enzyme				0.0451	CTSD,MYC,NUPR1
DUSP6	-0.439	phosphatase				0.0451	ARG2,CDKN1A,ERCC1
HAS2		enzyme				0.0451	Ccl2,CD44,MMP9
UACA		other				0.0451	CAPN1,CEBPD,HSPA5
UTS2R		G-protein coupled receptor				0.0451	ACAT1,MSR1,SCARB1
AIM2		other				0.0451	CASP1,Ifi202b,IL1B
MCAM		other				0.0451	ATF3,FN1,VIM
RECK		other				0.0451	CDKN1A,MMP9,TP53
DEK	0.555	transcription regulator				0.0451	Ccl2,CEBPE,CSF3R
UCHL3		peptidase				0.0451	BAX,NEDD8,TP53
raltitrexed		chemical drug				0.0451	CDKN1A,FAS,TP53
racemic flurbiprofen		chemical drug				0.0451	CCNB1,MMP9,TP53
hexamethoxyflavone		chemical toxicant				0.0451	ICAM1,MMP9,VCAM1
pentazocine		chemical drug				0.0451	CAT,GPX1,SOD1
iodine		chemical - endogenous mammalian				0.0451	BAX,ICAM1,TP53
tyrphostin AG 127		chemical - kinase inhibitor				0.0451	BAX,IL1B,PARP1
arachidic acid		chemical - endogenous mammalian				0.0451	EIF2A,IL1B,XBP1
N-chlorotaurine		chemical - kinase inhibitor				0.0451	CAT,PRDX1,TXN
lead acetate		chemical toxicant				0.0451	CASP8,GSTM5,GSTP1
SCAP		other	Activated	2.158	bias	0.0453	ACAA2,ACSL1,ACSL5,ATF3,CSF1R,CYP4F2,FABP5,FDPS,INSIG1,LGALS3,MVD,SQLE,TMEM97
GON4L		transcription regulator		0.762	bias	0.0456	CCNA2,CCNB1,CCNB2,CCND3
1'-acetoxychavicol acetate		chemical reagent		-1	bias	0.0456	BIRC5,ICAM1,MMP9,MYC
PPARÎ±-RXRÎ±		complex	Activated	2	bias	0.0456	ACAA1,ACADL,AP2A2,GOT2
IGFBP7		transporter		0		0.0456	CDKN1A,MMP9,MYC,PCNA
SMC3		other				0.0456	HLA-DQA1,HLA-DQB1,MYC,THBS1
mir-154		microRNA		-1.253	bias	0.0456	BAX,BIRC5,KLF10,PLAUR
CPEB1		translation regulator				0.0456	CCNB1,MMP9,MYC,TP53
BDKRB2		G-protein coupled receptor		-1.131		0.0456	CD44,ICAM1,ITGAM,TP53
HOXB4		transcription regulator		0	bias	0.0456	CCND3,GPX3,JUNB,MYC
TNFSF9		cytokine		0	bias	0.0456	CD14,ICAM1,TNFRSF1A,VCAM1
CNOT3		other				0.0456	ALDH1B1,MYC,SOAT1,UCP2
SP2		transcription regulator				0.0456	CDKN1A,CEACAM1,MAT2A,PRKCD
PLIN1		other				0.0456	ACADL,HADHA,HADHB,UCP2
TOPBP1		other				0.0456	BAX,CDKN1A,GADD45A,MYC
PDK4		kinase				0.0456	IL1B,IRF8,PKM,RHEB
PARK7	0.929	enzyme		-0.106		0.0456	BAX,ICAM1,TXN,VIM
ECM1	0.365	transporter		1.304	bias	0.0456	GRN,S100A4,VIM,ZEB2
leupeptin		chemical - protease inhibitor				0.0456	CD9,GBA,ITGB1,VRK1
isoquercitrin		chemical drug	Activated	2	bias	0.0456	ACAT2,FDPS,INSIG1,SQLE
TIMP3		other		0	bias	0.0461	FAS,FKBP1A,JUN,KLF4,MMP9,NFKB1,THBS1,VIM,ZEB2
BTNL2		transmembrane receptor		0		0.0462	CD74,EMB,FGL2,FGR,Hspa1b,IFITM3,IFNGR1,MXD1,NT5E,PLXDC1,S100A4,TNFRSF1B
cephaloridine		chemical drug		1.761	bias	0.0463	CCNB1,CDT1,FCN1,GINS2,GSTM5,GSTP1,HSPA1A/HSPA1B,Ifitm6,MCM3,MCM5,MCM6,MRPS36,NUP93,PSMD11,USE1
L-alanine		chemical - endogenous mammalian				0.0465	CDKN1A,PCNA
platelet activating factor-C16		chemical - endogenous mammalian				0.0465	ITGAM,PLA2G7
flavokawain A		chemical - endogenous non-mammalian				0.0465	BAX,BIRC5
Metalloprotease		group				0.0465	FN1,ITGAM
S6K1		group				0.0465	BTG1,TP53
ZXDC		transcription regulator				0.0465	CD14,ITGAM
ATF6B	0.348	transcription regulator				0.0465	HSPA5,XBP1
USP28		peptidase				0.0465	CDKN1A,TP53
Carlr		other				0.0465	IL1B,NFKB2
USE1	0.363	other				0.0465	HSPA5,XBP1
HCAR1		G-protein coupled receptor				0.0465	BSG,SLC16A3
B3GNT2	-0.339	enzyme				0.0465	CD14,IL1B
PRMT8		enzyme				0.0465	EIF4E,EIF4H
SLC13A5		transporter				0.0465	CCNB1,CDKN1A
CYP2C8		enzyme				0.0465	Ccl2,IL1B
TEX11		other				0.0465	BAX,CCNB1
P2RY6	0.877	G-protein coupled receptor				0.0465	Ccl2,VCAM1
Pif		other				0.0465	PSMB3,PSMC6
SIRT4		enzyme				0.0465	Ccl2,IL1B
USP22		peptidase				0.0465	CDKN1A,MVP
MUCL1		other				0.0465	CCND3,CDKN1A
RPRD1A		other				0.0465	CTSB,MMP9
AKR1C3		enzyme				0.0465	FKBP4,PROS1
K Channel		complex				0.0465	CDKN1A,TP53
tetrahydrocurcumin		chemical - endogenous mammalian				0.0465	CDKN1A,IL1B
VLDL		complex				0.0465	PON2,VCAM1
PDLIM1	0.804	transcription regulator				0.0465	PDLIM1,VIM
NXF1	0.329	other				0.0465	CD44,ITGAL
Casein		group				0.0465	ICAM1,IL1B
RRM2		enzyme				0.0465	MMP9,THBS1
GIT1		kinase				0.0465	MMP9,PXN
cerotic acid		chemical - endogenous mammalian				0.0465	CD40,IL1B
CTSD	-0.773	peptidase				0.0465	EEF2,TXN
TAP1		transporter				0.0465	HLA-A,PSMB9
FAM57A		other				0.0465	CDK4,TP53
CDC25B		phosphatase				0.0465	MYC,TP53
CELA2A		peptidase				0.0465	CDKN1A,SLPI
G0S2	-1.675	other				0.0465	HSPD1,MYC
UFD1		peptidase				0.0465	NFKB2,TNFSF13B
BCAP31	0.416	transporter				0.0465	CD81,CD9
miR-127-3p (miRNAs w/seed CGGAUCC)		mature microRNA				0.0465	BCL6,XBP1
miR-331-3p (miRNAs w/seed CCCCUGG)		mature microRNA				0.0465	KIF23,PLAUR
miR-1285-3p (and other miRNAs w/seed CUGGGCA)		mature microRNA				0.0465	TP53,VIM
mir-138		microRNA				0.0465	LCN2,VIM
MAPK15		kinase				0.0465	JUN,PCNA
EGFL7		other				0.0465	ICAM1,VCAM1
TOPORS		enzyme				0.0465	BAX,CDKN1A
crocin		chemical drug				0.0465	HSPA5,XBP1
CALCR		G-protein coupled receptor				0.0465	CDKN1A,TP53
TOP3A		enzyme				0.0465	CDKN1A,TP53
GCLC		enzyme				0.0465	JUN,JUNB
NPLOC4		other				0.0465	NFKB2,TNFSF13B
P2RX4	0.513	ion channel				0.0465	IL1B,MMP9
IL17B		cytokine				0.0465	CDKN1A,MMP9
CELF2		other				0.0465	BAX,TP53
ATP2A1		transporter				0.0465	CALR,HSPA5
BBC3		other				0.0465	PRDX1,STMN1
SNRK	-0.276	kinase				0.0465	CACYBP,MYC
S3I-1757		chemical reagent				0.0465	BIRC5,MMP9
PLK3		kinase				0.0465	CDKN1A,FAS
PLAC8	1.255	other				0.0465	CDKN1A,TP53
GNPAT		enzyme				0.0465	Ccl2,IL1B
TSN	0.264	other				0.0465	BCL6,TSNAX
SLC9A3R2	-0.851	transporter				0.0465	MYC,SCARB1
CTH		enzyme				0.0465	CDKN1A,HSPA5
SCIN		other				0.0465	GSN,RAC2
AMFR		transmembrane receptor				0.0465	CD3D,CD82
CD300LD		other				0.0465	Ccl2,CD300LF
Mt3		other				0.0465	CEBPD,GSTP1
PODXL		kinase				0.0465	MMP9,VIM
RPL5	1.218	other				0.0465	MYC,TP53
NOC2L		transcription regulator				0.0465	BAX,CDKN1A
TXN2	0.621	enzyme				0.0465	CYBB,NCF1
RRM2B		enzyme				0.0465	BAX,CDKN1A
CKS2		kinase				0.0465	CCNA2,CCNB1
azurin 50-77		biologic drug				0.0465	CDKN1A,TP53
p38 MAP kinase inhibitor		chemical drug				0.0465	CDKN1A,MMP9
methylamine		chemical - endogenous mammalian				0.0465	FN1,IL1B
PTIO		chemical reagent				0.0465	ITGAM,NCAM1
Ro31-8425		chemical - kinase inhibitor				0.0465	Ccl2,PRKCD
sodium alum		chemical drug				0.0465	IL1B,TPT1
1,1-diethyl-2-hydroxy-2-nitrosohydrazine		chemical toxicant				0.0465	GADD45A,TNFRSF1A
Phe-Pro-Arg-chloromethyl ketone		chemical - protease inhibitor				0.0465	ICAM1,OSM
erucic acid		chemical - endogenous non-mammalian				0.0465	ALOX5,IL1B
elaidic acid		chemical - endogenous mammalian				0.0465	LCN2,VCAM1
vigabatrin		chemical drug				0.0465	IL1B,RPS6
L-asparagine		chemical - endogenous mammalian				0.0465	CDKN1A,PCNA
oxamic acid		chemical - endogenous non-mammalian				0.0465	IL1B,INHBA
Collagen type VI		complex				0.0465	BAX,CCNB1
thymeleatoxin		chemical toxicant				0.0465	CD55,CDKN1A
rubitecan		chemical drug				0.0465	FAS,PEBP1
ITGAV		transmembrane receptor		-1.331	bias	0.0473	BAX,CDKN1A,FN1,MMP9,OSM,PCNA,TP53
THBS1	-0.711	other		1.011		0.0473	Ccl2,EGR1,FN1,IL1B,MMP9,PARP1,THBS1
CIDEC		other		-1.195	bias	0.0473	ACADL,Ccl2,COX4I1,Cox5b,CYCS,DGAT1,DGAT2
NR1I3		ligand-dependent nuclear receptor	Activated	2.24	bias	0.048	CDKN1A,CYP27A1,FAM107B,GSTM5,GSTP1,HSD17B4,ICAM1,INSIG1,LRG1,Mt1,MYC,PAPSS2,PGD,PSMB7,SLC29A1,TNFRSF1A
HDAC2		transcription regulator	Inhibited	-3.673		0.0483	ALOX5,APEX1,BCL6,CDKN1A,CDT1,CYBB,EGR1,FAS,MCM3,MCM5,MCM7,MMP9,MTA3,MYC,OLFM4,POLD2,RBBP7,S100A9,TP53
SPIB		transcription regulator		1.311	bias	0.0492	ATF3,Bst2,CCDC12,CCR2,CLEC10A,EGR1,HSPA1A/HSPA1B,Hspa1b,KDM6B,LRRFIP1,NFKB1,P2RY6,XBP1
SH3TC2		other				0.0493	ACSL1,EBP,EGR1,FDPS,MVD,SQLE
ACTL6A	0.446	other	Activated	2.236		0.0493	CCNA2,CCNB1,CCNB2,CDKN1A,FAS,MYC
ARRB1		other				0.0493	CAMP,Ccl2,EGR1,JUNB,MYC,SCARB1
RIPK1		kinase		-0.269	bias	0.0493	BIRC5,CAT,GRN,IL1B,NFKB1,TP53
NF1		other	Inhibited	-2.4	bias	0.0493	MXD1,MYC,NPM1,RPL10A,RPL21,RPS19
Pkg		group		0.555	bias	0.0495	CAT,EGR1,JUN,PRDX2,TXN
IKK (complex)		complex		-0.156		0.0495	ICAM1,IL1B,MMP9,MYC,VCAM1
cis-urocanic acid		chemical drug		-0.2	bias	0.0495	CD55,CLDN1,GLRX,HSPA1A/HSPA1B,PPIF
MSR1	0.809	transmembrane receptor		-0.577		0.0495	CD40,F10,IL1B,MMP9,NFKB1
GADD45A	-0.583	other		1.387		0.0495	CDKN1A,IL1B,JUN,MMP9,PCNA
PD184352		chemical drug				0.0495	CD40,EGR1,HSPA5,OPTN,TRMT112
mezerein		chemical - endogenous non-mammalian				0.0495	CD74,CDKN1A,EEF1A1,FN1,INSIG1
fludarabine		chemical drug		0.967		0.0495	CDKN1A,DEK,FAS,PCNA,TP53
Vegf		group		1.649	bias	0.0498	ADAM15,ATF3,AURKA,AURKB,BAX,BIRC5,CASP1,CASP8,Ccl2,CD40,CD44,CDC20,CDKN3,CKS1B,CLDN1,CSE1L,CXCR2,CXCR4,DKC1,EBP,EGR1,EIF2B2,EMP1,FAS,FN1,GMNN,GPSM2,HDC,HOPX,HPSE,ICAM1,INHBA,INSIG1,ITGB1,JUN,KIF22,LCN2,LPAR6,LY75,MCM2,MCM5,MGST2,MIF,MMP9,MYC,NFKB1,NLRP12,NRP1,PLAUR,PLK1,RAF1,RGCC,RNF187,SNRK,TACSTD2,TRIB1,UBE2C,VCAM1,VIM
XDH		enzyme		-1.915		0.0538	Ccl2,CXCR4,CYBB,DUSP1,IL1B,PLAUR,VIM
HNRNPK	0.437	transcription regulator		1.951		0.056	ANXA7,CDKN1A,KDM6B,LAPTM4A,MYC,Tmsb4x (includes others),UCP2,VCAN
CBS/CBSL		enzyme	Inhibited	-2		0.0564	EEF1A1,EEF1D,GOT2,SCARB1
AQP1		transporter		1.987		0.0564	AKR1B1,LCN2,NUPR1,PGK1
RELB	0.264	transcription regulator	Activated	2.415		0.0663	B2M,CD40,CDKN1A,IL1B,LTB,MAT2A,MYC,NFKB2,NFKBIB,RELB,TNFRSF1A
D609		chemical reagent		1.964		0.0685	JUN,MMP9,NFKBIB,VCAM1
GJA1		transporter	Inhibited	-2.425		0.0742	CD40,CDKN1A,ICAM1,IL1B,THBS1,VIM
AGTR1		G-protein coupled receptor		1.982		0.0765	DUSP1,FN1,GSTM5,GSTP1,JUN,MGST1,TXNIP
anandamide		chemical - endogenous mammalian	Activated	2.616		0.0765	FKBP1A,HSPA5,IL1B,MAP2K1,STIP1,TP53,TPI1
raloxifene		chemical drug		1.889		0.0803	AIMP1,ANXA3,CCNB1,CDKN1A,CNBP,CTSH,DUSP1,GNS,HIST2H2AA3/HIST2H2AA4,HSPA1A/HSPA1B,IDH2,IFI30,ITGB1,JUN,LITAF,MIF,PCNA,PRPS1,PTTG1,SELENBP1,SOD1,TOP2A
glycine		chemical - endogenous mammalian		1.951		0.0818	CDKN1A,IL1B,ITGAM,PCNA
SEL1L		other		-1.969		0.0818	DNAJB11,DNAJC3,HSPA5,XBP1
glutathione		chemical - endogenous mammalian		1.757		0.0829	ASS1,ATF3,BAX,Ccl2,CDKN1A,GPX3,IL1B,PCNA,VCAM1
Tgf beta		group		1.804		0.0937	Acp5,CASP1,CASP8,Ccl2,CCR2,CDKN1A,CSF1R,CX3CR1,CXCR4,F10,FN1,GUSB,IL16,IL1B,IL1RN,ITGB1,JUN,JUNB,KDM6B,KLF10,MIF,MMP9,MXD1,MYC,PROM1,SLFN12L,TGFBI,TREM1,VCAM1,VIM
S-nitroso-N-acetylpenicillamine		chemical reagent		1.954		0.0941	CDKN1A,FAS,HSPA1A/HSPA1B,MARCKSL1,S100A10,TP53
RUNX1		transcription regulator		-1.8		0.0959	ARL5C,BAX,BTG2,CCND3,CDKN1A,CSF1R,FAS,IL1B,IL6R,ITGAL,ITGB1,LMO4,LTB4R,Ly6a (includes others),MMP8,Mt1,MYH9,NCAM1,RGCC,S100A9,SPATA6,ST3GAL5,TP53
NR1H2	0.255	ligand-dependent nuclear receptor		1.93		0.101	C3,Ccl2,FDPS,HSD11B1,HSD17B4,IL1B,IL1RN,ITGAL,MMP9,PLTP,RPS14,SCARB1,SLC16A10
NUPR1	0.946	transcription regulator	Inhibited	-2.871		0.111	AEN,API5,ATF3,AURKA,AVPI1,BRCC3,BTG1,CCNA2,CCNB2,CD63,CD68,CDCA3,CDCA8,CDK4,CKAP2L,CNPY4,CXCR4,FCF1,GADD45A,GPSM2,HFE,HIST1H4A,HNRNPA2B1,HNRNPM,IL13RA1,IL6R,KIF20A,KIF23,KLF4,KXD1,MAFG,MAT2A,MEGF9,MGLL,MXD1,MYC,NAAA,NSF,NUPR1,PARP1,PCYOX1,PEA15,PLK1,PPP1R15A,RELB,RPA1,SAMHD1,SIGMAR1,SLC16A10,SPTSSA,TMPO,TP53,TRAFD1,TRIB1,XBP1,ZFP36L1
zinc sulfate		chemical drug		1.945		0.112	C3,Hspa1b,IL1B,Mt1
NR1H4		ligand-dependent nuclear receptor	Activated	2.046		0.154	C3,Ccl2,FABP5,FAS,GPX1,HK3,HSPA5,IL1B,ITGAM,KLF4,LCN2,MYC,Orm1 (includes others),PLTP,RARA,SCARB1,SDHA,TK1,TPI1,TXNIP
PTK2		kinase	Inhibited	-2.008		0.162	Ccl2,CDKN1A,FN1,MMP9,SERPINB1,THBS1,TP53,VCAM1
CETP		enzyme		1.987		0.164	HSPA5,P4HB,PDIA3,PDIA4
cafestol		chemical - endogenous non-mammalian		1.964		0.164	CYP27A1,GSTM5,GSTP1,PLTP
lithium		chemical drug		-1.94		0.172	BAX,CASP8,CDKN1A,EGR1,FAS,HDAC1,JUN,MMP9,NCAM1,NFKB1,TP53
Hsp27		group	Inhibited	-2.2		0.183	BAX,CD14,CDKN1A,CSF1R,GBA,IL6R
AZGP1		transporter		-1.969		0.183	EGR1,GYS1,MYC,VIM
Laminin (complex)		complex		-1.969		0.198	FN1,ITGB1,MMP9,PXN,RPSA,VIM
MTTP		transporter	Inhibited	-2.213		0.211	EIF2S1,HSPA5,JUN,SOAT1,XBP1
NR4A3		ligand-dependent nuclear receptor	Activated	2.621		0.224	ATP5F1A,BAX,NDUFA5,NDUFB8,SDHB,UBE2C,UCP2,UQCRC2
indole-3-carbinol		chemical drug	Activated	2.224		0.228	ANXA1,BAX,CDKN1A,HP,LCP1
HES3		transcription regulator	Activated	2.236		0.379	IFI30,IFNAR2,RBM3,SOD1,TUBA1A
FFAR3		G-protein coupled receptor	Activated	2.138		0.51	BAX,FCGR1A,GPR183,HLA-DMB,ICAM1,IL1B,LY86,TP53
VDR		transcription regulator	Inhibited	-2.18		1	Ccl2,CD14,CDKN1A,DOK1,GADD45A,ICAM1,IL1RN,JUN,MYC,RELB,TK1,UCP2
2,4,5,2',4',5'-hexachlorobiphenyl		chemical toxicant		-1.897		1	CDS2,GADD45A,Hnrnpa1,MYC,NUMB,PCBP1,Ppp2r5c,SNRPA1,SPG21,TWF2

## Sheet: C2 vs All
Supplementary Table 7b: Ingenuity Upstream Modulator Analysis of Cluster 2 Macrophages compared to all non-cluster 2 macrophages
Upstream Regulator	Expr Log Ratio	Molecule Type	Predicted Activation State	Activation z-score	Flags	p-value of overlap	Target molecules in dataset	Mechanistic Network
RICTOR		other	Inhibited	-12.175	bias	1.58e-113	Atp5e,ATP5F1A,ATP5F1B,ATP5F1C,ATP5F1D,ATP5MC1,ATP5MC2,ATP5MC3,ATP5MF,ATP5MG,ATP5PB,ATP5PD,ATP5PF,ATP5PO,ATP6V0B,ATP6V1A,ATP6V1B2,ATP6V1C1,BAX,BSG,COX4I1,COX5A,Cox5b,COX6A1,COX6B1,Cox6c,COX7A2,COX7A2L,COX7B,Cox7c,COX8A,CYC1,EGR1,FABP5,FAU,IFI16,Mx1,NDUFA1,NDUFA10,NDUFA2,NDUFA3,NDUFA4,NDUFA5,NDUFA6,NDUFA9,NDUFAB1,NDUFB10,NDUFB2,NDUFB3,NDUFB4,NDUFB5,NDUFB6,NDUFB8,NDUFB9,NDUFC1,NDUFC2,NDUFS2,NDUFS3,N…
TP53	0.351	transcription regulator		1.413		1.83e-58	ABCB8,ACAA2,ACADL,ACAT1,ACO2,ACSL1,ACTL6A,ADAM8,ADH5,ADORA2B,ADRB2,AHCY,AKR1B1,ALDH1B1,ALDH9A1,ALOX5,ANXA1,ANXA3,ANXA4,ANXA6,APEX1,API5,APOBEC1,ARL6IP1,ARRB2,ASF1B,ASS1,ATF3,Atp5e,ATP5F1A,ATP5F1C,Atp5k,ATP5MC1,ATP5MC3,ATP5PB,AURKA,AURKB,BAX,BCAP31,BCL2A1,BID,BIRC5,BTG1,BTG2,BUB1B,CAP1,CARHSP1,CASP6,CASP8,CAT,Ccl2,CCNA2,CCNB1,CCNB2,CCS,CD44,CD81,CD82,CDC16,CDC20,CDK1,CDK4,CDKN1A,CDKN1B,CDKN2D,CDKN…	605 (18)
5-fluorouracil		chemical drug	Inhibited	-7.399		6.39e-55	ANXA4,ATP5F1B,ATP5F1C,ATP5PB,ATP5PO,BAX,BIRC5,BTF3,CANX,CCT3,CCT4,CCT6A,CD40,CDK1,CDKN1A,COX6A1,COX6B1,COX8A,CSTB,CYCS,ECHS1,EEF1G,EEF2,EGR1,EIF2S2,EIF3C,EIF3E,EIF3G,EIF4A1,FAS,FBL,FDPS,FKBP1A,GAPDH,GARS,GOT2,GSN,HADHA,HNRNPA2B1,HSP90AB1,HSPA8,HSPE1,IDH2,IL1B,KARS,MAT2A,MDH1,MVP,MYC,NACA,NDUFA1,NDUFA4,NDUFS8,NDUFV2,NOP56,OAZ1,PCBP1,PGK1,PRC1,PSMA6,PSMA7,PSMB1,PSMB2,PSMB5,PSMB7,PSMD2,PSME1,PSME2,P…	831 (21)
CD 437		chemical drug	Inhibited	-7.77	bias	3.19e-54	AKR1B1,AP2M1,AP2S1,API5,ARHGDIB,ARL2,ATP5F1A,ATP5F1B,ATP5F1C,ATP5MC3,ATP5MG,ATP5PF,ATP5PO,BANF1,BAX,CCT2,CCT3,CCT6A,CDK4,CDKN1A,CLIC1,COX7A2,COX7A2L,COX7B,EEF2,EIF3D,EIF3G,EIF3I,EIF4A1,EIF4B,EIF5A,ENO1,ERH,FAS,FTL,GADD45A,HADHA,HSP90AA1,HSPA8,IMP3,JUN,KARS,KPNA2,LGALS1,LSM3,MGST1,MTCH2,MYC,NACA,NARS,NDUFB9,NME1,NOP10,NPM1,NR4A1,PABPC1,PCBP1,PDIA3,PFN1,PGAM1,PHYH,PLP2,PSMA4,PSMB1,PSMD3,RPL10,RPL11…	411 (14)
MYC	0.308	transcription regulator	Activated	7.557		8.07e-52	ABCD1,ABCF1,ACAT1,ADIPOR1,AHCY,AIMP2,ALOX5,ANXA4,ANXA5,ANXA6,APEX1,Arf2,ARHGAP25,ARL6IP1,ASPRV1,ASS1,ATP13A2,ATP5IF1,AURKB,BAX,BCL2A1,BCL6,BIN1,BIRC5,BUB1B,C1QBP,CANX,CAPN2,CASP8,Ccl6,CCNA2,CCNB1,CCNB2,CCT3,CD44,CD48,CD9,CDC20,CDK1,CDK4,CDKN1A,CDKN1B,CEBPD,CEBPE,CHST15,CIAO2A,CNBP,CNP,COX6A1,COX6B1,COX7A2L,CRIP1,CSDE1,CSE1L,CSRP2,CSTB,CTNNA1,CTSB,CTSV,CYCS,CYFIP2,DBI,DCTPP1,DDX39B,DKC1,DUSP1,Ear2…	877 (22)
sirolimus		chemical drug	Inhibited	-7.875	bias	1.3e-48	ABHD11,ANXA5,ARHGDIB,ASS1,ATP5F1C,ATP5MC1,ATP5MG,ATP6V0B,ATP6V1A,ATP6V1B2,BAX,BCKDHA,BCL2A1,BID,BIRC5,Ccl2,CD40,CD68,CDK4,CDKN1A,CDKN1B,CLIC1,COX6A1,COX6B1,CXCR4,CYCS,DAD1,DDT,DPP7,DPYSL2,EBI3,EEF1A1,EEF2,EGR1,EIF1AX,EIF2S1,EIF4A1,ENO1,ERCC1,FAS,FN1,FPR1,GSTP1,H3F3A/H3F3B,HIST1H4A,HSP90AA1,HSP90AB1,HSP90B1,HSPA4,HSPA5,HSPD1,ICAM1,IDH1,IL16,IL1B,JUNB,LCN2,LGALS3,LMNA,MAP1LC3B,MMP9,Mt1,MYC,NCAM1,ND…	797 (18)
ST1926		chemical drug	Inhibited	-7.968	bias	1.85e-43	AKR1B1,AP2M1,AP2S1,ATP5F1A,ATP5F1B,ATP5PF,CCT2,CCT3,CCT6A,CDK4,CDKN1A,CFL1,CHCHD2,CLIC1,COX7A2,COX7A2L,COX7B,EEF2,EIF3D,EIF3E,EIF3G,EIF3I,EIF4A1,EIF4B,EIF5A,ENO1,H2AFZ,HSP90AA1,IMP3,KARS,KPNA2,LGALS1,LSM3,MGST1,MTCH2,NACA,NARS,NDUFB9,NME1,NOP10,NPM1,PABPC1,PDIA3,PFN1,PSMA4,PSMB1,PSMD3,RPL10,RPL13,RPL18A,RPL19,RPL24,RPL36AL,RPL39,RPL41,RPL6,RPL8,RPS10,RPS15,RPS2,RPS26,RPS27A,SLC25A3,SLIRP,SNRPB,SN…
MYCN		transcription regulator	Activated	6.834		1.93e-43	ABCD1,ABCF1,ACTG1,APEX1,BAX,BID,BIRC5,CDKN1A,CDKN1B,CKAP4,EEF1A1,EEF1D,EEF1G,EEF2,EIF3C,EIF4A1,EIF5A,FAU,FN1,GAPDH,HLA-A,HSP90AB1,HSPD1,INHBA,LGALS1,MAGT1,MYH9,MYL12A,NACA,NCAM1,NME1,NME2,NPM1,NUCB1,PDIA4,PHB,PHGDH,PSMA7,PSMB6,PSMB7,RBBP7,RFC3,RPL10,RPL11,RPL12,RPL13,RPL13A,RPL17,RPL18,RPL18A,RPL19,RPL21,RPL22,RPL23,RPL24,RPL26,RPL27,RPL27A,RPL28,RPL3,RPL30,RPL31,RPL35,RPL35A,RPL37,RPL37A,RPL38,R…	677 (20)
1,2-dithiol-3-thione		chemical reagent	Activated	7.928	bias	5.9e-38	ACTG1,AKR1A1,CCT3,CCT7,CLPP,COPS5,DAD1,DDX39B,DNAJB11,DSTN,EIF2S1,EIF3C,EIF3D,EIF3E,EIF3G,EIF6,ERP29,ESD,F10,GSTP1,HM13,HMBS,HPRT1,HSP90AA1,HSP90AB1,HSP90B1,LMNA,LY6E,M6PR,MGLL,MORF4L2,MRPS18B,NARS,NFE2L2,P2RX4,PCBP1,PDIA3,PDIA4,PDIA6,PPIB,PRDX1,PSAT1,PSMA1,PSMA2,PSMA4,PSMA5,PSMA6,PSMA7,PSMB1,PSMB2,PSMB3,PSMB4,PSMB5,PSMB6,PSMC1,PSMC2,PSMC3,PSMC6,PSMD1,PSMD11,PSMD12,PSMD13,PSMD14,PSMD3,PSMD4,PSMD5…	249 (5)
HNF4A		transcription regulator		1.205		1.39e-35	ABCB8,ACAA2,ACAT1,ACO2,ACSL1,ADIPOR1,ADRB2,AHNAK,AIMP1,AKR1B1,ALDH2,ANXA5,APH1A,ARG2,ARL1,ASAH1,ASPRV1,ATF6B,ATG3,ATOX1,ATP5MD,BCCIP,BCKDHA,BCL6,BLOC1S1,BPHL,BTG1,C11orf58,C3,CAP1,CAPZA2,CAT,CBX3,CCDC115,CCNA2,CCNB1,CCT8,CD55,CDC123,CDK1,CDK2AP2,CDK5RAP3,CDKN1A,CDKN1B,CDKN2AIPNL,CEACAM1,CEBPD,CEP19,CETN3,CHCHD2,CHCHD3,CLDN1,CLTA,CNBP,COMMD9,COPB2,COPS7A,COPZ1,COX7A2,COX7A2L,COX8A,CRIP1,CS,CTSA,CT…	839 (21)
NFE2L2	-0.266	transcription regulator	Activated	7.276	bias	2.89e-35	ACTG1,AKR1A1,ATF3,Calm1 (includes others),CAT,Ccl2,CCT3,CCT7,CDKN1A,CLPP,COPS5,COX4I1,CS,CYBB,DAD1,DCTN3,DDX39B,DNAJB11,DSTN,EIF2S1,EIF3C,EIF3E,EIF3G,ERP29,ESD,F10,FN1,FTL,GPX1,GPX3,GSTO1,GSTP1,HM13,HMBS,HPRT1,HSP90AA1,HSP90AB1,HSP90B1,HSPA9,IDH1,IFRD1,IL1B,IL1RN,IL36G,KEAP1,LMNA,LY6E,M6PR,MAFG,MAP1LC3B,MGLL,MGST1,MGST3,MMP9,MORF4L2,MRPS18B,Mt1,NARS,NCF1,NCF2,NFE2L2,OAT,OGT,P2RX4,PCBP1,PDIA3,PDIA…	448 (15)
interferon beta-1a		biologic drug		-0.993		3.84e-35	ALG5,ATP5MC3,ATP5MG,BUB3,CCR2,CCT4,CCT6A,CD3D,COPS5,COX5A,COX6A1,CS,CXCR4,EEF1G,EIF2B1,ENO1,FCGR1A,FKBP1A,FPR1,GPR65,GSTP1,HLA-DRB5,IFI35,IL16,IL1RN,KARS,LGALS1,LTB,LTF,MMP9,MRPL20,MRPS18B,NCF2,NDUFA1,NDUFA2,NDUFB2,NDUFB9,PGAM1,PGK1,PLAUR,PPIA,PSMB8,PSME1,RAE1,RAN,RPL18,RPL19,RPL22,RPL24,RPL26,RPL27,RPL27A,RPL3,RPL36AL,RPS19,RPS28,RPS7,S100A9,TBCB,TNFSF13B,TRADD,TREX1,UQCRFS1	266 (7)
MAPT		other		0.277		3.52e-34	ACO2,ACTG1,AIF1,ANXA5,ANXA6,ARF4,ATOX1,ATP1A3,Atp5e,ATP5F1A,ATP5F1B,ATP5F1C,ATP5F1D,ATP5PD,ATP5PF,ATP6V1A,BSG,C1QBP,C3,CANX,CAP1,CAPN1,Ccl2,CCNB1,CDKN1A,CDKN1B,CFL1,CLTA,COX4I1,COX5A,Cox6c,COX7A2,CS,CYCS,CYFIP2,DBI,DPYSL2,DSTN,EEF1G,ENO1,FBL,FKBP1A,GAPDH,GAS7,GDI2,GLO1,GOT2,GSTP1,H2AFV,HINT1,HSP90AA1,HSPA1A/HSPA1B,HSPA5,HSPA8,HSPD1,HSPE1,IL1B,JUN,MDH1,NDUFA5,NDUFS3,NDUFS6,NDUFS8,NME1,PEA15,PEBP1,…	820 (18)
STK11		kinase	Inhibited	-6.222	bias	1.07e-32	AHCY,AKR1A1,ALDH9A1,ASS1,ATF3,Atp5e,ATP5F1C,ATP5F1D,Atp5k,ATP5MC1,ATP5MC2,ATP5MC3,ATP5MF,BCL7B,BTF3,Ccl2,CCNA2,CCT6A,CDKN1A,CDKN1B,COX5A,Cox5b,COX6A1,COX6B1,COX7A2,Cox7c,COX8A,CS,CSF3R,CYC1,DCTPP1,EIF3A,ENO1,ENOPH1,FN1,GADD45A,GAPDH,GOT2,GPI,IMPDH2,JUNB,LTB,MMP9,MRPS10,MRPS15,MYC,NDUFA10,NDUFA13,NDUFA2,NDUFA3,NDUFA4,NDUFA9,NDUFB11,NDUFB9,NDUFC2,NDUFS7,NDUFS8,NDUFV1,NEDD9,NME2,NT5E,PDE2A,PGK1,PHGD…	820 (24)
IL3		cytokine		1.093	bias	3.51e-31	AKR1A1,ALDH2,ARHGDIB,ARHGEF1,BTG2,Calm1 (includes others),CALR,CAT,Ccl6,CCT5,CD14,CD3D,CD40,CD48,CD63,CDKN1A,CDKN1B,CLEC4C,COPS4,CSNK1A1,CXCR4,DAD1,EEF1A1,EGR1,EIF1AX,EIF3G,EMP3,FAS,FCGR2A,FKBP3,GADD45A,GPX1,HLA-A,HNRNPA2B1,HSP90B1,HSPA5,HSPA9,ICAM1,IK,IL1B,IMPDH2,ITGAM,ITGB7,JUN,JUNB,LCN2,LY75,LY9,MCM5,Mt1,MYC,NACA,NARS,NCF1,NEDD9,NRP1,OSM,PHGDH,PLA2G7,PPM1G,PPP5C,PSMA5,PSMB3,PSMB7,PSMC4,PSME1,R…	440 (17)
imatinib		chemical drug	Inhibited	-3.065		4.91e-30	ARL6IP1,ATP1B3,ATP5F1D,ATP5MC2,ATP5MC3,ATP5PB,ATP6V0B,ATP6V1A,ATP6V1C1,AURKA,BAX,BCAP31,BIRC5,CALR,CAPN1,CASP8,Ccl9,CCNA2,CCNB1,CDKN1A,CDKN1B,CEBPE,CNBP,COPB2,COX6B1,COX7A2,COX7A2L,COX7B,CXCR4,CYBB,CYC1,DHX15,DNAJB11,EIF4B,ERP29,FAIM,FN1,HAT1,HSP90AB1,HSP90B1,HSPA5,HSPA8,HSPE1,IFRD1,IL1B,ITGA1,ITGAM,KDELR1,LMAN2,MAD2L1,MCM3,MCM7,MYC,NDUFA1,NDUFA12,NDUFA13,NDUFA2,NDUFA4,NDUFA6,NDUFB2,NDUFB5,NDUFB6…	761 (22)
lipopolysaccharide		chemical drug		-0.461	bias	1.97e-28	ACSL1,ADORA2B,ADRB2,ALDH2,ALOX5,ANKRD22,ANXA1,ANXA3,ANXA5,ANXA7,APEX1,API5,APOBEC1,Arf2,ARG2,ASS1,ATF3,ATP5MC1,AURKB,BATF,BAX,BCL2A1,BCL6,BID,BTG1,C3,C3AR1,C5AR1,Calm1 (includes others),CALR,CAMP,CAPN2,CASP8,Ccl2,Ccl9,CCNB1,CCNB2,CCR1,CCR2,CCRL2,CD14,Cd24a,CD300LF,CD37,CD40,CD44,CD48,CD55,CD68,CD74,CD9,CDK4,CDKN1A,CEACAM1,CEBPD,CFB,CFP,CLDN1,CLEC4C,CLEC4E,CLEC5A,COX4I1,CSF3R,CSTB,CTSB,CTSC,CTSV,C…	581 (14)
arsenic trioxide		chemical drug		0.696		6.01e-28	ACAT2,ARL6IP1,ATP1B3,ATP5F1D,ATP5MC2,ATP5MC3,ATP5PB,ATP6V0B,ATP6V1A,ATP6V1C1,AURKA,BAX,BCAP31,BCL2A1,BLVRA,CALR,CASP8,CD44,CDK1,CDKN1A,CEBPE,CNBP,COPB2,COX6B1,COX7A2,COX7A2L,COX7B,CYC1,DHX15,DNAJB11,EBP,ERP29,FAIM,FAS,FDPS,FN1,GLRX,H2AFX,HAT1,HSP90AB1,HSP90B1,HSPA5,HSPA8,HSPE1,IFRD1,ITGAM,KDELR1,KEAP1,LMAN2,MCM3,MCM7,MMP9,MYC,NCF1,NDUFA1,NDUFA12,NDUFA13,NDUFA2,NDUFA4,NDUFA6,NDUFB2,NDUFB5,NDUFB6,N…	663 (19)
Hbb-b1		transporter	Activated	4.836	bias	5.19e-26	ATP5F1C,ATP5MC1,ATP5MC2,ATP5MF,ATP5PO,Ccl2,CCR2,CD44,CD74,CMTM3,COX19,Cox6c,COX8A,CXCR2,CYBB,CYC1,FN1,FTL,ICAM1,IL16,IL1B,ITGAM,LTB,LY86,Mt1,NCF2,NDUFA13,NDUFA3,NDUFA4,NDUFA5,NDUFA6,NDUFA9,NDUFB11,NDUFB4,NDUFB8,NDUFB9,NDUFC1,NDUFS3,NDUFS7,NDUFS8,NDUFV1,NDUFV2,SDHA,UCP2,UQCRC1,UQCRC2,VCAM1	454 (13)
CD3		complex	Activated	5.382	bias	1.46e-25	AIMP1,ANXA1,ARHGDIB,ATP5F1C,BATF,BCL2A1,BCL6,BIRC5,BTG1,BZW1,CASP6,CASP8,CCR1,CCR2,CD44,CD74,CDK1,CDK4,CDKN1B,CEACAM1,CKS1B,COPB2,COX5A,CS,CXCR4,CYC1,CYCS,DAD1,DDT,DHRS4,DUSP22,EBI3,EBP,EIF4A3,EIF4E,EXOSC8,FAS,FBL,FDPS,FKBP1A,FKBP2,FKBP3,FTL,GABARAPL2,GAPDH,GDI2,GYS1,H2AFY,HAT1,HINT1,HIST1H2AC,HIST2H2AA3/HIST2H2AA4,HLA-DQB1,HMGN1,HNRNPA2B1,HNRNPF,HNRNPR,HSP90AA1,HSP90B1,HSPA1A/HSPA1B,HSPA5,HSPA8,…	676 (20)
E2F1		transcription regulator		1.837	bias	2.03e-25	ACADL,ALG5,ATP5MC1,AURKA,AURKB,BAX,BID,BIRC5,BUB3,Calm1 (includes others),CALR,CASP6,CASP8,CCNA2,CCNB1,CCNB2,CCT2,CCT4,CD44,CD9,CDC20,CDCA4,CDK1,CDK4,CDKN1A,CDKN1B,CDKN2D,CLIC1,COX4I1,COX5A,Cox7c,CSDE1,CSE1L,CTSB,DDX1,DDX39B,DUSP1,EGR1,EIF3I,ERH,FAS,FEN1,FKBP3,GM2A,GMNN,GPS2,HADHA,HIST1H2AC,HIST2H2AA3/HIST2H2AA4,HMGN1,Hmgn2 (includes others),HNRNPK,HNRNPR,HSP90B1,HSPA8,HSPD1,HSPE1,ICAM1,IDH3A,Ifi…	649 (19)
TCR		complex	Activated	3.371	bias	2.95e-25	ABCD1,ARHGEF1,ATP5F1B,ATP5PB,ATP5PD,BATF,BCL2A1,BIN1,BSG,CCR1,CCR2,CD44,CDKN1B,CS,CTSB,CXCR4,DKC1,EGR1,EIF4E,ENO1,F5,FAS,FBL,GLUD1,HADH,HSD17B10,HSP90B1,HSPA5,HSPA9,HSPD1,IDH2,IFNGR1,IL16,ITGB7,JUN,JUNB,LAMP1,LIPA,LMNB1,LSM3,MDH1,MYC,NDUFA10,NHP2,NME1,NOP58,NR4A1,NRP1,OAS1,P2RX7,P4HB,PA2G4,PDCD4,PDIA4,PGAM1,PGK1,PHB,PHB2,PRELID1,PXN,RPL10A,RPL13A,RPL15,RPL17,RPL18A,RPL22,RPL3,RPL30,RPL31,RPL38,RP…	627 (19)
torin1		chemical reagent	Inhibited	-6.524	bias	3.12e-25	ALDH1B1,ALDH9A1,ATP5F1B,ATP5MC1,ATP5MF,ATP5MG,ATP5PB,ATP5PD,ATP5PF,ATP6V0B,ATP6V1C1,CDKN1B,COX4I1,COX5A,COX6B1,COX7A2,COX7B,COX8A,CYC1,ENO1,GAPDH,GPI,NDUFA1,NDUFA2,NDUFA3,NDUFA6,NDUFA9,NDUFAB1,NDUFB10,NDUFB2,NDUFB3,NDUFB8,NDUFC1,NDUFC2,NDUFS2,NDUFS7,NDUFS8,PDHB,PGAM1,PGK1,PPA1,RPS20,RPS6,SDHB,TPI1,UQCR10,UQCRFS1
PSEN1		peptidase		-1.164		1.45e-24	ACO2,ACSL1,ACTG1,ARF4,ATOX1,ATP1A3,Atp5e,ATP5F1A,ATP5F1B,ATP5F1C,ATP5F1D,ATP5PD,ATP5PF,ATP6V1A,BAX,BSG,C1QBP,C3,C3AR1,CANX,CAP1,CCS,CD74,CD9,CFL1,CLTA,Cox6c,COX7A2,COX8A,CS,CTSC,CTSS,CTSZ,CYCS,CYFIP2,DBI,DHRS7,DPYSL2,DSTN,DUSP1,EEF1G,EGR1,EMP1,ENO1,Erdr1,FAM32A,FBL,FKBP1A,GAPDH,GDI2,GOT2,GSTP1,H2AFV,HINT1,HLA-E,HSP90AA1,HSPA5,HSPA8,HSPD1,HSPE1,IL1B,IRF5,MMP9,MSR1,MYC,NCAM1,NDUFA5,NDUFS6,NME1,NUPR…	866 (22)
pirinixic acid		chemical toxicant	Activated	4.704	bias	2.86e-24	ACAA2,ACADL,ACAT1,ACAT2,ACSL1,ADIPOR1,ALDH9A1,ANXA7,BAX,BSG,C3,CAT,Ccl2,CCNA2,CCNB1,CCT3,CCT6A,CCT7,Cd24a,CD63,CDK1,CDK4,CDKN1A,CDKN1B,CEACAM1,CFH,CTSB,CYP27A1,DAD1,DBI,ECI1,EIF3E,ETFDH,FABP5,FAS,FEN1,FKBP1A,G0S2,GADD45A,GAPDH,GOT2,HADH,HADHA,HADHB,HIST1H1C,HLA-DQA1,HLA-E,HMGN1,Hmgn2 (includes others),HSD17B10,HSD17B4,HSP90AA1,HSPD1,HSPE1,IFITM3,IL1B,IL1RN,INSIG1,IRF8,ITGAM,JUNB,KLF10,LCN2,LGALS3…	770 (21)
INSR		kinase	Activated	6.205	bias	5.09e-24	ACAA2,ACADL,ACO2,ACSL1,ALDH2,ARHGDIA,ATF3,ATP5F1A,ATP5F1B,ATP5F1D,ATP5MC1,ATP5MC3,ATP5MF,ATP5MG,ATP5PD,ATP5PF,ATP5PO,BCL2A1,BIRC5,Calm1 (includes others),CASP6,Ccl2,CDK1,CDKN1A,CFL1,COX4I1,Cox5b,CS,CSTB,CTSB,CTSV,CXCR4,CYC1,CYCS,DEK,DUSP1,ECHS1,ECI1,EGR1,ETFA,ETFB,ETFDH,FDPS,FEN1,FH,GADD45A,GAPDH,GOT2,GRN,HADHA,HADHB,HSD17B10,HSD17B4,HSPD1,IDH1,IDH3A,IER2,Ifi202b,IFNAR2,IL1B,IQGAP1,JUNB,KLF10,LAT…	859 (22)
RRP1B		transcription regulator				5.54e-23	ANAPC13,AURKA,BIRC5,CCNA2,CCNB2,CDC20,CDK1,CDKN1A,CDKN2D,EIF3H,EIF4B,FEN1,GADD45A,HAT1,HSP90AA1,HSP90AB1,ITGB2,MCM2,MCM3,MCM5,MCM6,PCNA,PLK1,RARA,RPA1,RPL11,RPL13,RPL13A,RPL14,RPL19,RPL22,RPL27,RPL37,RPL37A,RPL39,RPL6,Rplp1 (includes others),RPS10,RPS14,RPS19,RPS26,Rps27/Rps27rt,RPS3,RPS5,RPS8,RPS9,TOP2A,TUBG1
tretinoin		chemical - endogenous mammalian	Inhibited	-3.369		9.27e-23	ACSL1,AHNAK,AIMP1,AKR1A1,ALDH9A1,ALOX5,ANXA1,ANXA5,ANXA6,APEX1,ARHGEF1,ATP1B3,ATP6V1B2,AURKA,BCL2A1,BCL6,BID,BIRC5,BTG1,BTG2,C3,C3AR1,C5AR1,Calm1 (includes others),CALR,CAPN2,CASP6,Ccl2,CCNA2,CCNB1,CCPG1,CCR1,CCRL2,CCT5,CD101,CD14,CD44,CD63,CD68,CD74,CD82,CD9,CDC20,CDK4,CDKN1A,CDKN1B,CDKN2D,CDKN3,CEACAM1,CEBPE,CFP,CLDN1,CSE1L,CSF3R,CSNK1A1,CTSB,CTSC,CTSS,CX3CR1,CXCR4,CYBB,CYP4F2,DAD1,DBI,DDX60,DG…	661 (17)
APP		other	Activated	2.085		9.9e-23	ACO2,ACTG1,AIF1,ANXA5,ANXA6,APH1A,APLP2,ARF4,ARL6IP5,ASCC1,ATOX1,ATP1A3,Atp5e,ATP5F1A,ATP5F1B,ATP5F1C,ATP5F1D,ATP5PD,ATP5PF,ATP6V1A,BAX,BSG,C1QBP,C3,CALR,CANX,CAP1,CAPN1,CAT,Ccl2,CD40,CD44,CD68,CD74,CD82,CDC37,CDK1,CDK4,CFL1,CLDN1,CLIC1,CLTA,COX4I1,COX5A,Cox6c,COX7A2,CRYL1,CS,CTSB,CTSV,CXCR2,CXCR4,CYBB,CYCS,CYFIP2,DBI,DPYSL2,DSTN,EEF1G,EGR1,ENO1,FBL,FCGR1A,FCGR2A,FKBP1A,FN1,GAPDH,GDI2,GOT2,GPI,GS…	754 (19)
mono-(2-ethylhexyl)phthalate		chemical toxicant	Activated	4.03	bias	1e-22	ACADL,ACAT2,ACO2,ACSL1,APOBEC1,ATP5F1B,ATP5F1D,ATP5PB,BAX,BSCL2,CDK4,COX4I1,COX6A1,COX7A2,CS,CYC1,DGAT1,DGAT2,ECHS1,ENO1,FAS,FH,GAPDH,GPI,HADH,HADHA,IDH3A,IDH3G,IER2,IL1B,JUNB,MDH1,NDUFA10,NDUFA2,NDUFB5,NDUFB9,NDUFS2,NDUFS7,NDUFV1,NDUFV2,OGDH,PDHB,PGK1,PPA1,SDHA,SDHB,SDHC,SDHD,SOD1,SS18,SUCLG1,TALDO1,TKT,TPI1,TSPO,UQCRC1,UQCRC2,UQCRFS1,UQCRHL	704 (18)
D-glucose		chemical - endogenous mammalian		-0.734		1.01e-22	ACAA2,ACADL,ACO2,ACSL1,ADIPOR1,AKR1B1,ANXA1,ANXA3,ARF4,ASS1,ATF3,Atp5e,ATP5MC2,BAX,BIRC5,C3,CALR,CANX,CAP1,CAPZA1,CAPZA2,CAT,Ccl2,CCNB1,CCPG1,CD55,CDK1,CDK4,CDKN1A,CDKN1B,CDT1,CTSB,CTSV,CXCR4,CYBB,DBI,DNAJB11,DUSP1,EGR1,EIF2A,ENO1,FABP5,FAS,FKBP2,FN1,GAPDH,GPI,GRN,GSN,HK3,HNRNPK,HP,HPRT1,HSPA5,HSPD1,ICAM1,IDH1,IER2,Ifi27l2a/Ifi27l2b,IL1B,INHBA,ITGA1,JUN,JUNB,KDELR2,KLF10,LCP1,MAFB,MID1IP1,MIF,MMP…	592 (20)
mibolerone		chemical drug	Activated	3.846		1.97e-22	ACSL1,AHNAK,ARF4,CALR,CD74,CDK1,CEACAM1,CLTA,DAD1,DBI,DHRS3,DNAJB11,EIF2S1,EIF4A1,ERP29,FDPS,FKBP1A,GMNN,GOT2,HEXB,HLA-DQA1,HLA-E,HSP90B1,HSPA5,IDH3G,IFNGR1,INCENP,ISYNA1,JUN,KLF10,LRG1,MAT2A,MYC,NANS,NME1,NME2,P4HB,PCNA,PGK1,PPIA,PPIB,Rrbp1,SEC23B,SLC25A5,SMPDL3A,SQLE,SRM,STMN1,TGFBI,TK1,TOP2A,TUBA1A,UCP2
HBA1/HBA2		transporter	Activated	5.112	bias	2.34e-22	ATP5F1C,ATP5MC1,ATP5MC2,ATP5MF,ATP5PO,COX19,Cox6c,COX8A,CYC1,Mt1,NDUFA13,NDUFA3,NDUFA4,NDUFA5,NDUFA6,NDUFA9,NDUFB11,NDUFB4,NDUFB8,NDUFB9,NDUFC1,NDUFS3,NDUFS7,NDUFS8,NDUFV1,NDUFV2,SDHA,UCP2,UQCRC1,UQCRC2
dexamethasone		chemical drug		-1.636		2.92e-22	ACADL,ACAT1,ACOT7,ACSL1,ACTG1,ADAM15,ADRB2,ALDH1B1,ALOX5,ANXA1,ANXA3,ARG2,ARHGAP17,ARHGAP25,ARHGDIA,ARRB2,ASF1B,ATF3,ATP1A3,ATP6V1B2,ATP6V1C1,BATF,BAX,BCAT2,BCKDHA,BCL2A1,BCL6,BIRC5,BSCL2,BSG,BTG1,BTG2,C3,C3AR1,C5AR1,Calm1 (includes others),CALR,CAMP,CANX,CAPN1,CASP6,CAT,Ccl2,CCNA2,CCR1,CCR2,CCT2,CD177,CD3D,CD40,CD44,CD48,CD55,CD74,CDK4,CDKN1A,CDKN1B,CDV3,CEACAM1,CEBPD,CFB,CFL1,CHIT1,Clec2d (incl…	699 (19)
methylprednisolone		chemical drug		0.857		1.01e-21	ACSL1,AHCY,Akr1c12/Akr1c13,ANXA1,ANXA3,AP2A2,APEX1,ASAH1,ASS1,ATP5F1C,ATP5IF1,BTG1,C1QBP,Calm1 (includes others),CAMK1,Ccl2,CCT6A,Cd24a,CD44,CD74,CD9,CDKN1A,CNP,COMT,COX6A1,CTSC,CTSH,CTSS,CTSV,CYBB,CYC1,CYCS,DHRS9,DUSP1,ECE1,EMP1,FABP5,FARSA,FCGR2A,FGL2,FGR,FKBP4,FN1,G0S2,GADD45A,GATM,GDA,GLUD1,GSTP1,HAAO,HAL,HMBS,HSD17B10,HSD17B12,HSD3B7,HSP90B1,HSPA1A/HSPA1B,IDH1,IDH2,IFNGR1,IGSF6,IL1B,IL1RN,IL…	757 (19)
TCL1A		transcription regulator	Inhibited	-2.135	bias	6.37e-21	APOBEC1,C3AR1,CAMP,CCR1,CD68,CFP,CLEC4E,CSF3R,CTSB,CTSC,CTSH,CTSS,CXCR2,CYBB,FPR1,GUSB,IGSF6,IL17RA,IL1B,IL1R2,ITGAM,ITGB2,LCN2,LTF,Ly6a (includes others),LY9,MAFB,MMP8,MMP9,MPEG1,MSR1,NEU1,Ngp,PTPRO,Retnlg,S100A8,S100A9,SCARB2,SLC40A1,Srgn,TREM2	647 (12)
PTEN		phosphatase		-0.47		8.89e-21	ABCA9,ACAA2,ACO2,ACSL1,ALG3,ANXA1,ARF4,ARHGDIA,ATF3,ATP5MC1,AURKA,AURKB,BAX,BIRC5,BTG1,BTG2,C3,Ccl2,CCNB1,CCNB2,CD40,CDC20,CDK4,CDKN1A,CDKN1B,CDKN2D,CKS1B,COX5A,COX8A,CS,CTSB,CTSV,CTSZ,CX3CR1,CXCR4,CYP27A1,DUSP1,EBP,FAM213B,FAS,G0S2,G3BP1,GPX3,GYS1,H2AFY,HADH,HADHA,HADHB,HCLS1,HEXB,HLA-DMA,HMGN1,HSPA1A/HSPA1B,IDH2,IDH3A,IDH3B,IDH3G,IFI30,IFRD1,IL1B,LEPROT,LGALS3,LRRFIP1,LZTR1,MAD2L1,MAT2A,MDH1,MM…	841 (23)
ciprofloxacin		chemical drug		-0.074		2.94e-20	ACO2,ADAM8,ALDH2,ALDH3B1,ASAH1,ATP5F1A,ATP5F1C,ATP6V1A,ATP6V1B2,ATP6V1C1,CCR1,CD40,CD68,CTSA,CTSV,EMILIN2,GBA,GLUD1,GRN,GUSB,HLA-A,HSPA9,HSPD1,ICAM1,ITGAL,ITM2C,LGMN,LRPAP1,MPEG1,MSR1,NRP1,PLXNB2,PSAP,RPL10A,RPL12,Rpl34 (includes others),RPL7A,RPS18,RUVBL1,SHMT2,TEX264,TMPO,TUFM,VDAC1,VIM	298 (7)
IFNG		cytokine		1.753	bias	3.19e-20	ADORA2B,AHCY,AIF1,AMER2,ARG2,ARL6IP5,ASS1,ATF3,ATG3,BAX,BCL2A1,BID,Bst2,BTG1,C3,C5AR1,CASP6,CASP8,CAT,Ccl2,Ccl6,Ccl9,CCNA2,CCR1,CCR2,CCRL2,CD14,Cd24a,CD40,CD44,CD55,CD63,CD68,CD74,CDK4,CDKN1A,CDKN1B,CEACAM1,CEBPD,CFB,CFP,CLEC10A,CLEC4E,CLEC5A,CSE1L,CTSB,CTSC,CTSH,CTSS,CTSV,CTSZ,CX3CR1,CXCR4,CYBB,CYP27A1,DDB1,DDX60,DUSP1,EBI3,ECE1,EDNRA,EEF1A1,EGR1,ENO1,FABP5,FAS,FCGR1A,FCGR2A,FCGR3A/FCGR3B,FGL2,F…	501 (14)
RB1		transcription regulator	Activated	2.162		8.2e-20	ACO2,ALG5,ASF1B,ATP5F1A,Atp5k,AURKB,BAX,BCKDHA,BIRC5,CASP6,CASP8,CCNA2,CCNB1,CDCA4,CDK1,CDKN1A,CDKN1B,CDT1,CHCHD3,COA3,COX4I1,COX6A1,COX6B1,COX7A2,DEK,DNAJC11,EDNRA,EGR1,FAS,FEN1,FN1,GHITM,GMNN,GPS2,H1F0,IDH3B,Ifi202b,MCM2,MCM3,MCM5,MCM6,MCM7,MDH1,MRPL12,MYC,NDUFA10,NDUFA13,NDUFA2,NDUFA3,NDUFA4,NDUFA5,NDUFA6,NDUFA9,NDUFB10,NDUFB8,NDUFS2,NDUFS7,NDUFV1,NME1,OGT,PARK7,PARP1,PCNA,PGD,PLK1,PMPCB,RAB27…	647 (18)
beta-estradiol		chemical - endogenous mammalian	Activated	4.883		1.51e-19	ACAA2,ACSL1,ACTL6A,ADRB2,AIF1,ANXA1,ANXA3,ANXA4,APEX1,ARRB2,ATF3,ATP5F1B,ATP5PB,AURKA,BATF,BAX,BCL2A1,BCL6,BID,BIN1,BIRC5,BSG,BTG1,BTG2,BUB3,C3,CALR,Ccl2,CCNA2,CCNB1,CCNB2,CCR1,CCR2,CCT2,CD14,CD40,CD44,CD55,CD74,CDC123,CDC20,CDK1,CDKN1A,CDKN1B,CDT1,CEBPD,CENPM,CFB,CKS1B,CLDN1,Clec2d (includes others),CNBP,CNN2,CNP,COMT,COX5A,CSE1L,CSF3R,CSTB,CTSB,CTSH,CXCR4,CYBB,CYCS,DDOST,DERL1,DHRS9,DUSP1,DUSP3…	735 (21)
LONP1		peptidase	Inhibited	-2.744	bias	1.73e-18	ACAT1,ATP5F1A,ATP5F1D,ATP5IF1,ATP5PF,C1QBP,CHCHD3,COX5A,COX8A,ECI1,ETFB,GARS,GLUD1,HIST1H2BC,HNRNPA2B1,HSPA9,HSPD1,HSPE1,IDH3A,IMMT,MRPL18,MRPS22,P4HB,PDIA3,PFN1,PGAM1,SARS,SOD1,TRAP1,TUFM,UQCRFS1,VDAC1,VDAC2
KDM5A		transcription regulator	Inhibited	-6.173	bias	1.74e-18	ACO2,ATP5F1A,Atp5k,BCKDHA,CD55,CDKN1B,CHCHD3,COA3,COX4I1,COX6A1,COX6B1,COX7A2,DNAJC11,GHITM,IDH3B,MCM2,MCM3,MDH1,MRPL12,NDUFA10,NDUFA13,NDUFA2,NDUFA3,NDUFA4,NDUFA5,NDUFA6,NDUFA9,NDUFB10,NDUFB8,NDUFS2,NDUFS7,NDUFV1,NME1,PARK7,PGD,PMPCB,SDHB,SDHC,SDHD,TIMM50,TOMM6,Tpm1,TXN2,UQCRC1,UQCRFS1,UQCRQ,VDAC1	316 (7)
KRAS		enzyme		1.486		3.21e-18	AHNAK,AIMP2,APLP2,ATF3,BIRC5,BSG,CAMK1,Ccl2,CCNA2,CCNB1,CCT5,CD44,CD74,CDKN1A,CDKN1B,CDT1,CEACAM1,CLEC10A,CS,CSE1L,DPYSL2,DUSP1,EEF1A1,EGR1,EIF4E,EIF5A,ENO1,ENOPH1,EXOSC5,FAS,FN1,GADD45A,GAPDH,GBA,GMNN,GRN,GSN,HADHB,HEXA,HOPX,HSPA5,HSPE1,IFITM3,IL1B,IVNS1ABP,JUN,JUNB,KIF22,LAMP1,LCN2,LGALS3,LMNB1,Ly6a (includes others),MAP1LC3B,MID1IP1,MMP9,MYC,NCAM1,NDE1,NFE2L2,NME2,NR4A1,NSF,NSUN2,NT5E,NUDC,OAS…	559 (18)
ERBB2		kinase	Activated	4.19	bias	9.35e-18	ACAA2,ADAM8,AHNAK,AIMP2,APLP2,ATP1B3,ATP6V1A,AURKA,BCAT2,BIRC5,BTG2,BUB1B,CAPZA2,CCNA2,CCNB1,CCNB2,CD82,CD9,CDC16,CDC20,CDC37,CDC42SE1,CDCA3,CDCA4,CDCA8,CDK1,CDKN1A,CDKN1B,CDKN3,CDT1,CENPA,CKS1B,CRIP1,CSE1L,CTSB,DERL1,DGAT1,DHRS7,EBP,EGR1,EIF6,EMP1,EMP3,EPSTI1,ETFB,FEN1,FN1,FRRS1,G3BP1,GINS2,GLO1,GPAA1,GPX3,GTF3A,HADHB,HNRNPK,HP,HSPA1A/HSPA1B,IDH1,IL1B,IL6R,JUN,JUNB,JUP,LAMP1,LCN2,LGALS1,LGALS3,L…	752 (24)
TGFB1		growth factor		0.448		1.21e-17	ABCD1,ABCF1,ACAA2,ADI1,ADORA2B,AHNAK,ALDH2,ALOX5,AMER2,ANXA11,ARF4,ASS1,BAX,BCL6,BIN1,BIRC5,BSG,BTG1,BUB1B,C3,C3AR1,C5AR1,Calm1 (includes others),CAMP,CAP1,CAPRIN1,CASP8,CAT,Ccl2,CCNA2,CCNB1,CCNB2,CCR1,CCR2,CCRL2,CCT2,CCT5,CCT6A,CD14,CD40,CD44,CD55,CD68,CDC20,CDC42SE1,CDK1,CDK4,CDKN1A,CDKN1B,CDKN3,CDT1,CEACAM1,CENPA,CFB,CFH,CFL1,CKS1B,Clec2d (includes others),CNN2,CORO1C,COX5A,CPQ,CSRP2,CTSB,CTSC…	732 (16)
CSF2		cytokine	Activated	2.137	bias	1.48e-17	ADAM8,ADORA2B,AKR1A1,ALOX5,ANXA1,AURKA,BAX,BCL2A1,BID,BIRC5,BSG,BUB1B,C3,C5AR1,Ccl2,CCNA2,CCNB1,CCR1,CD14,CD180,CD40,CD63,CD74,CDC123,CDC20,CDCA3,CDCA8,CDK1,CDKN1A,CDKN1B,CEACAM1,CFH,CKS1B,CLEC4C,CTSC,CXCR4,CYBB,EGR1,FAS,FCGR1A,FFAR2,FPR2,HDAC3,HDC,HLA-DQB1,HSPD1,ICAM1,IFITM3,IK,IL16,IL1B,IL1RN,ILF3,INHBA,IRF5,ITGAM,LCP1,LTB,LY75,LY9,MAT2A,MCM3,MCM5,MCM6,MMP9,MYC,NACA,NCAPH,NLRP3,NR4A1,NRP1,NUSAP…	593 (15)
XBP1	0.424	transcription regulator	Activated	5.848	bias	1.84e-17	ARCN1,ATF6B,CALR,CAT,Ccl2,COPB2,COPE,COPG1,COPZ1,DAD1,DDOST,DERL1,DNAJB11,ERP29,FAS,FKBP1B,FKBP2,FN1,GORASP2,GOSR2,HDAC3,HM13,HSP90B1,HSPA5,ICAM1,KDELR2,LMAN1,LMAN2,MAP1LC3B,MGAT2,MYC,NCF1,PDIA3,PDIA4,PDIA6,PPIB,RABAC1,RPN1,RPN2,Rrbp1,SDF2L1,SEC11A,SEC23B,SEC31A,SEC61A1,SEC61B,SEC61G,SOD1,SPCS2,SPCS3,SSR1,SSR2,SSR3,SSR4,SURF4,TRAM1,TXNDC5,VCAM1,XBP1,YIF1A	449 (14)
calcitriol		chemical drug	Inhibited	-5.752		2.21e-17	AAAS,ACAT2,ACSL1,ALOX5,ATP5F1D,BATF,BAX,BIRC5,BUB1B,C15orf48,C3,CAMP,CCNA2,CCNB1,CD14,CD40,CDC20,CDCA8,CDK1,CDKN1A,CDKN1B,CDT1,CEBPD,CENPA,CENPM,Clec2d (includes others),COMT,COQ9,CSE1L,DCTPP1,DUSP1,EGR1,ETFB,EXOSC8,FAS,FDPS,FEN1,FN1,GADD45A,GAPDH,GLRX,GLUD1,H2AFZ,Hmgn2 (includes others),HSD17B4,HSPA9,HSPD1,IDH1,IDH2,IL1B,IL1RN,INCENP,ITGAM,ITGB7,JUN,KIF20A,KIF22,KIF23,KPNA2,LAMP1,LCN2,LGALS1,LSM…	815 (22)
mir-21		microRNA	Inhibited	-3.756	bias	7.35e-17	AIF1,ARCN1,ARF4,ARL6IP1,BTG2,CACYBP,CANX,CCNA2,CCNB1,CCT8,CD180,CDKN1A,CLEC5A,COPG1,CSE1L,CSF3R,FAS,FCGR1A,FCGR2A,FGL2,FN1,H2AFX,HNRNPA2B1,ICAM1,IFI16,Ifi47,IL1B,IL36G,IL6R,KIF23,Klrk1,LTB,MIS18A,MMP9,MYC,NLRP3,NME1,NUSAP1,OAS3,Orm1 (includes others),PDCD4,PGAM1,PILRB,POLR2F,PPA1,PRC1,PSME2,RACGAP1,SEPT2,SESN1,SIRPB1,Slfn2,SLPI,SOCS6,SRSF3,SSR1,STAT3,STMN1,STRAP,SUMO1,TACC3,TMEM97,TOP2A,TP53,TREM…	683 (18)
PPARA		ligand-dependent nuclear receptor		1.52		1.42e-16	ACAA2,ACADL,ACAT1,ACAT2,ACSL1,AHCY,ALDH2,ALDH9A1,ANAPC5,APEX1,ARHGDIA,ASS1,ATP5F1B,AURKA,BAX,C3,CAT,Ccl2,CCNA2,CCNB1,Cd24a,CD63,CDK1,CDK4,CDKN1A,CDS2,CEACAM1,CEBPD,CFH,Clec2d (includes others),COX4I1,CS,CYBB,CYCS,CYP27A1,DBI,ECI1,ETHE1,FABP5,FDPS,G0S2,GLUD1,GOT2,GSTP1,H2AFX,H2AFZ,HADH,HADHA,HADHB,HIST1H1C,HLA-DQA1,HLA-E,HMGN1,Hmgn2 (includes others),HSD17B10,HSD17B4,IFITM3,IL1B,IL1RN,INSIG1,KHK,K…	521 (17)
valproic acid		chemical drug	Inhibited	-3.986		1.91e-16	ADRM1,AKR1B1,ATF3,BIRC5,Bmyc,CACYBP,CALR,CASP8,CAT,CCR1,CD40,CD44,CDC123,CDKN1A,CDKN1B,CDS2,CENPM,CKS1B,CRYL1,CTSB,CXCR4,DBI,DNAJB11,EIF2S1,FAS,FDPS,HDAC3,HIST1H3G,HSD3B7,HSPA5,ICAM1,ITM2C,JUN,MCM3,MCM6,MGAT2,MVD,NAA10,NCAM1,NME1,NPC2,PDIA6,PMM2,POMP,PSMA1,PSMA2,PSMA3,PSMA4,PSMA5,PSMA6,PSMA7,PSMB1,PSMB10,PSMB2,PSMB3,PSMB4,PSMB5,PSMB6,PSMB7,PSMB8,PSMB9,PSMC1,PSMC2,PSMC3,PSMC4,PSMC5,PSMC6,PSMD1,PSM…	808 (20)
CDKN1A	0.568	kinase	Inhibited	-2.922		2.05e-16	AIMP1,ARL6IP1,AURKA,AURKB,BAX,BIRC5,BUB1B,BUB3,CCNA2,CCNB1,CDC20,CDK1,CDK4,CDKN1A,CDKN1B,CDKN3,CKS1B,CTSB,DUSP1,EDNRA,FAS,FN1,GRN,H2AFX,H2AFZ,HNRNPA2B1,HSPA1A/HSPA1B,HSPA5,IL1B,INHBA,ITGAM,KIF20A,KNSTRN,LGALS3,LGALS3BP,MAD2L1,MCM2,MCM3,MCM6,MCM7,MMP9,MYC,NPM1,NUSAP1,PARP2,PCNA,PHGDH,PLK1,PRC1,PSAP,RACGAP1,RFC4,RRM1,STMN1,TNFSF13,TOP2A,TP53,UBE2C,UHRF1,VIM	632 (18)
IND S1		chemical - kinase inhibitor		-1.414		2.74e-16	ATP5F1B,ATP5F1D,C1QBP,CFL1,COX5A,ENO1,ETFA,FH,HSPA1A/HSPA1B,PDIA3,PGAM1,PGK1,PRDX1,PRDX2,PSMA1,STIP1,TUBB,VDAC2
POLG		enzyme				4.73e-16	COX7A2L,EEF1B2,EIF3H,RPL13,RPL14,RPL23,RPL27A,Rpl32,Rpl36a,RPL5,RPL7,RPS16,RPS19,RPS24,RPS25,RPS27A,RPS5,TPT1,USE1
filgrastim		biologic drug	Inhibited	-3.27		5.32e-16	ACSL1,ADAM15,ALOX5,ANXA1,ANXA3,ARHGAP25,ASF1B,ATF3,ATP1A3,ATP6V1C1,BATF,BTG2,CCT2,CD177,CD44,CD48,CD55,CD74,CEACAM1,CHIT1,CLEC5A,CXCR4,CYBB,CYP27A1,CYSLTR1,DHRS9,ELMO2,EMILIN2,ENO1,EPSTI1,ERLIN1,F5,FABP5,FGL2,G0S2,GADD45A,GAPDH,GNGT2,GOLIM4,GPR183,GRINA,HLA-DMB,HLA-DQB1,HLA-DRB5,HP,HSPA9,IL18RAP,IL1R2,ITGAM,ITGB7,JUN,LGALS3,LTB4R,LY75,MCM7,MMP8,MMP9,MPEG1,MS4A6A,MVP,NCOA4,NDUFB6,NDUFV2,NLRP3,NR4A…
IL5		cytokine	Activated	2.032	bias	1.73e-15	ACAA2,ANXA6,ASS1,BCL6,CCR1,CCR2,CCRL2,CD40,CD55,CD63,CD9,CDC123,CDKN1A,CEACAM1,CHST12,CISD1,CKAP4,CRELD2,CRIP1,CSF3R,CTSC,CX3CR1,CXCR2,CXCR4,CYSLTR1,EBP,EGR1,ENO1,FAM162A,FAS,FGL2,GADD45A,HSP90B1,HSPA5,ICAM1,IER2,IFI30,IL18BP,IL1R2,IL6R,ITGAM,ITGB7,LMNB1,LTB,MANF,MAT2A,MMP9,MYC,NACA,PDIA6,PDLIM1,PPIF,PPP5C,PRDX4,PSAT1,PSMB4,RBM3,RPN1,S100A4,SDF2L1,SLC16A3,SLC1A5,SNAP23,SPCS2,SRI,TMEM97,TPI1,VIM,X…	723 (17)
IL15		cytokine		0.599	bias	2.92e-15	ANXA1,ARHGDIB,BTG1,Ccl2,CCR1,CCR2,CD40,CD44,CD55,CD74,CDK4,CDKN1A,CDKN1B,CEACAM1,CKS1B,COPB2,CX3CR1,CXCR4,DDT,DHRS4,EBP,EIF4E,ENO1,EXOSC8,FAS,FCGR3A/FCGR3B,FKBP1A,GABARAPL2,GAPDH,GARS,GDI2,GPI,H2AFY,HAT1,HCST,HIST2H2AA3/HIST2H2AA4,HNRNPA2B1,HNRNPF,HSPA8,HSPE1,IFI35,IL18RAP,ITGB7,JUN,JUNB,Klrk1,MCM5,MIF,MTA2,MYC,NAGA,NCAM1,NME1,OAZ1,PA2G4,PAFAH1B3,PCNA,PDCD4,PDCD5,PDIA3,PDIA4,PFN1,PGD,PGK1,PGM2,PL…	510 (18)
HRAS		enzyme		0.758		4.16e-15	ACTG1,ANXA3,ANXA6,ATP1A3,ATP5F1B,ATP5PF,AURKA,AURKB,BAX,BIRC5,BTG2,CAPG,CAPN2,Ccl2,CCNA2,CCNB1,CD44,CD81,CDK1,CDK4,CDKN1A,CDKN1B,CDKN2D,CEBPD,CFB,CFH,CHST12,CNN2,COPB2,CSRP2,CTSB,CTSC,CTSS,CTSV,CTSZ,DUSP1,EGR1,EIF3C,EIF4E2,ERCC1,ERP29,FAS,FN1,GPX3,GRN,GSN,GUSB,HDC,HNRNPA2B1,HSP90AA1,HSPA8,ICAM1,Ifi202b,IFI30,IL1B,ITGAM,JUN,JUNB,JUP,LASP1,LXN,MMP9,MRPL12,MSRB1,MYC,MYL12A,NOP58,NPM1,NRP1,NSFL1C,NUM…	774 (24)
benzyloxycarbonyl-Leu-Leu-Leu aldehyde		chemical - protease inhibitor	Activated	2.503	bias	4.73e-15	AKR1B1,ARHGDIB,ATF3,BAX,BIRC5,BUB1B,CAT,Ccl2,CCT2,CDK4,CDKN1A,CDKN1B,CDT1,CFB,CFL1,CLIC1,CTSB,DUSP1,EIF4E,EIF5A,FAS,G0S2,GSTP1,HNRNPA2B1,HSP90AA1,HSP90B1,HSPA4,HSPA5,HSPA8,HSPA9,HSPD1,ICAM1,IL1B,JUN,LMAN1,MAT2A,MMP9,MRTO4,MYC,NCF1,NCF2,NEDD8,NFE2L2,PARP1,PDCD4,PEBP1,PFN1,PPIA,PSMA3,PSMB3,PSMC1,PSMC4,PSMD1,PSMD12,PSMD13,PSMD2,PSMD6,PXN,RANBP1,RANGAP1,RPLP0,RPLP2,RRM1,SOD1,SQSTM1,STMN1,SUB1,TP53,TR…	715 (17)
tetraethylammonium		chemical drug		-1.987		4.74e-15	ARHGDIA,ATP5PD,CBX3,CDKN1B,GSTO1,HADHA,HSPA8,HSPA9,NDUFS8,PAFAH1B3,PARK7,PDIA3,PRDX3,PSMA6,PSMB4,RANBP1,RPLP0,SARS,SRI,SSR4,TBCB,TCP1,TPI1
IGF1R		transmembrane receptor	Activated	3.313	bias	7.36e-15	ACSL1,ANXA3,ATP5F1A,ATP5F1B,ATP5F1D,ATP5MC1,ATP5MC3,ATP5MF,ATP5MG,ATP5PD,ATP5PF,ATP5PO,BAX,CAPG,Cd33,CD37,CD48,CD68,CDK1,CDKN1A,CDKN1B,COX4I1,Cox5b,CYCS,EGR1,HADHA,HSPA5,IL16,IL1B,ITGAM,IVNS1ABP,KIF20A,LASP1,MYC,NDUFA1,NDUFA3,NDUFA4,NDUFA9,NDUFB4,NDUFB9,NDUFV2,NME1,NR4A1,PROM1,PSMC6,RACGAP1,RBBP7,RBM3,RPL10A,RPL24,RPL3,RPL35A,RPL37A,RPL7,RPL9,RPS21,RPS24,RPS26,S100A4,SF3B5,STAT3,TGFBI,TP53,UQCRC1…	721 (25)
VEGFA		growth factor	Activated	2.872	bias	1.08e-14	ACSL1,ADAM15,ADH5,ALDH2,ARG2,ATP5MC2,ATP5MC3,ATP5MF,ATP5PO,BATF,BAX,BCAT2,BCL2A1,BIRC5,Ccl2,Ccl9,CCRL2,CD40,CD55,CD68,CDKN1A,CDKN1B,CEACAM1,COX6B1,COX8A,CSTB,CTSB,CTSS,CTSV,CXCR4,EGR1,ETFA,FN1,HLA-DQB1,HSPA5,ICAM1,IL1B,ITGA1,JUNB,KARS,LMNA,ME2,MMP9,MRPL23,MRPS12,MVP,NDUFA1,NME1,NME2,NR4A1,NRP1,PARP1,PCNA,PPA1,SDHB,SDHD,SET,SHMT2,SLC25A17,SLC25A5,Stfa1 (includes others),THBS1,TIMM13,TP53,TSPO,TUFM…	430 (15)
gentamicin		chemical drug	Activated	2.314		1.16e-14	APEX1,ATF3,BAX,BTG2,CALR,CAPZA1,Ccl2,CD9,CPQ,CSRP2,CTSV,DDX39A,EEF1A1,EGR1,EIF2B2,EIF3D,ETFDH,GADD45A,GATM,GUK1,H2AFX,H3F3A/H3F3B,HSD17B4,HSP90AA1,HSP90B1,HSPA1A/HSPA1B,HSPA5,ICAM1,IDH1,IFRD1,IL1B,JUN,JUNB,KTI12,LCN2,LITAF,MCM6,MRPL23,MYC,NME1,NOP58,NPM1,NUDC,PDIA4,PFDN2,PHGDH,PRPS1,PSAT1,PSMB8,PTBP1,RGCC,RPS27L,RUVBL1,S100A1,SQSTM1,SSB,TARS,TP53,TUBB,VCAM1,YWHAH	361 (11)
2-amino-1-methyl-6-phenylimidazo-4-5-b-pyridine		chemical toxicant	Activated	4.085	bias	1.21e-14	ARHGEF1,BAX,CCT2,CCT4,CCT5,CCT7,CCT8,CDK4,G3BP1,HSP90AA1,HSPA5,HSPA8,HSPD1,HSPE1,PSMA2,PSMA6,PSMB1,PSMB2,PSMB4,PSMB9,PSME1,RAC2,RAN,SUMO1
TNF		cytokine	Inhibited	-2.326		1.33e-14	ACSL1,ADAM8,ADORA2B,ADRB2,AIMP1,AKR1B1,ALDH2,ALOX5,ANXA1,ANXA11,ARF4,ARHGDIB,ARL6IP5,ASS1,ATF3,ATP5PF,BAX,BCKDHA,BCL2A1,BCL6,BID,BIRC5,BLVRA,BTG1,BTG2,BUB1B,C3,C3AR1,C5AR1,CALR,CASP6,CASP8,CAT,Ccl2,Ccl6,Ccl9,CCR1,CCR2,CD14,CD40,CD44,CD55,CD82,CDK4,CDKN1A,CEBPD,CFB,CLEC4E,CLEC5A,CNP,CRCP,CRISPLD2,CTSB,CTSC,CTSS,CTSZ,CX3CR1,CXCR2,CXCR4,CYBB,CYP27A1,DBI,DGAT1,DHRS3,DUSP1,EBI3,EGR1,EIF2B2,EMP1,ERCC1,…	490 (15)
IL4		cytokine	Activated	3.282	bias	1.4e-14	ACSL1,ACTG1,ADORA2B,ADRM1,AHNAK,ALDH2,ALG3,ALOX5,ANXA1,ANXA4,ANXA6,APH1A,APRT,ARG2,ASS1,ATP1A3,ATP5MD,BANF1,BAX,BCAT2,BCL6,BIN1,BIRC5,C3,C5AR1,CAPG,CASP6,CAT,CBX3,Ccl2,Ccl6,CCT3,CD14,Cd24a,CD300LF,CD40,CD44,CD55,CD74,CDK1,CDKN1A,CDKN1B,CLEC10A,CLEC4C,CRIP1,CSF3R,CTNNA1,CTSC,CXCR4,CYSLTR1,EIF2S1,EIF3G,EIF4A1,F13A1,FAM162A,FAS,FBL,FCGR2A,FCGR3A/FCGR3B,FN1,FPR2,GATM,H1F0,HCK,HCLS1,HLA-DMA,HSD11B1,HS…	568 (15)
IND S7		chemical - kinase inhibitor	Inhibited	-2.065		1.44e-14	ATP5F1B,ATP5F1D,C1QBP,COX5A,ENO1,ERP29,ETFA,FH,GLUD1,HSPA1A/HSPA1B,PDIA3,PGAM1,PGK1,PRDX2,PSMA1,STIP1,TUBB,VDAC2,VIM
KLF3		transcription regulator		-1.86		1.62e-14	ABCF1,ADPGK,AHNAK,ALDH3B1,ANXA5,ANXA6,APRT,BCAP29,BLOC1S1,C11orf24,CAPG,CARHSP1,CCT3,CD55,CDKN2D,CFP,CTNNA1,CTSC,DHRS7,DOK3,EIF2B1,EIF5A,ELOF1,GAPT,GNGT2,GSTP1,HBP1,HEXB,HIST1H2AC,HIST1H2BI,HM13,HNRNPF,HYPK,IDH1,IL17RA,INTS4,ITGB7,MAP1S,MGST2,MIF,MRPL14,MTCH2,NSMCE1,NSUN2,PDLIM1,POP5,PPM1G,PSMB2,PSMC5,PSMD7,PTP4A2,RASSF1,RAVER1,REEP5,RNF167,Rpl29 (includes others),RPP21,RUVBL1,SMPDL3A,SNRK,SNX2,S…
metribolone		chemical reagent	Activated	4.938	bias	2.18e-14	ADRM1,AKNA,ALDH1B1,ALDH9A1,ARL6IP1,ATP5F1B,ATP5MC1,ATP5MF,ATP5MG,ATP5PB,ATP5PD,ATP5PF,ATP6V0B,ATP6V1C1,BAX,CCNA2,CCT2,CDKN1A,CDKN1B,COX4I1,COX5A,COX6B1,COX7A2,COX7B,COX8A,CXCR4,CYC1,EGR1,ENO1,FDPS,FPR1,GAPDH,GPI,HSPA5,MGLL,MYC,NDUFA1,NDUFA2,NDUFA3,NDUFA6,NDUFA9,NDUFAB1,NDUFB10,NDUFB2,NDUFB3,NDUFB8,NDUFC1,NDUFC2,NDUFS2,NDUFS7,NDUFS8,PDHB,PGAM1,PGK1,PHYH,PPA1,PPIB,PROS1,RAB27A,SDHB,SORD,THBS1,TP53,…	691 (20)
MEL S3		chemical - kinase inhibitor	Inhibited	-2.524		3.83e-14	ATP5F1B,ATP5F1D,C1QBP,COX5A,EGR1,ENO1,ERP29,ETFA,FH,GLUD1,HSPA1A/HSPA1B,PGAM1,PGK1,PRDX2,PSMA1,STIP1,TUBB,VDAC2,VIM
PC-SPES		chemical drug				4.25e-14	ALOX5,ANXA1,CCNA2,CD9,CDC20,CDKN1A,CKS1B,CTNNA1,DAD1,DCTN3,DSTN,FTL,GAPDH,GARS,GPI,HSD17B4,HSP90AA1,HSPA5,IL1B,MAD2L1,MCM2,MCM5,MGST1,OGT,P4HB,PA2G4,PEA15,PPP1R15A,RAN,SCARB1,SDHA,SELENBP1,TUBB2A,UBE2C,VIM
tunicamycin		chemical - endogenous non-mammalian	Activated	3.762	bias	5.24e-14	ARF4,ATF3,CALR,CANX,Ccl2,CDKN1A,CDKN1B,CEBPD,DGAT1,DGAT2,DNAJB11,EGR1,EIF2A,EIF2S1,HSD11B1,HSP90B1,HSPA5,HSPA9,ICAM1,IFRD1,IL1B,LMAN1,LMAN2,LMF1,MANF,MMP9,MORF4L2,MVD,MYC,NARS,P4HB,PADI4,PCNA,PDIA6,PDRG1,PROM1,S100A4,SDF2L1,SEC11A,SEC61A1,SEC61G,SERINC3,SIGMAR1,SLC35B1,SMARCB1,SPCS2,SSR3,SURF4,TBCB,TP53,TXNIP,VCAM1,XBP1	664 (16)
genistein		chemical drug	Activated	3.081		5.9e-14	ABCA9,ALOX5,ASAH1,ATP5PO,ATP6V0B,ATP6V1A,ATP6V1C1,BAX,BIRC5,C16orf54,C3,CAT,Ccl2,CCNB1,CCNB2,CCR2,CD44,CD68,CD74,CDK1,CDKN1A,CHST12,CTSA,CTSB,CTSH,CTSV,CX3CR1,CXCR2,CYP4F2,DNASE2,DUSP1,EVI2A,GBA,GM2A,GUSB,HCST,HDAC3,HEXA,HEXB,HLA-A,HLA-DQA1,HSPA1A/HSPA1B,HSPA5,ICAM1,IL1B,ITGB2,JUN,JUNB,LAMP1,LGMN,LIPA,LTF,LY86,M6PR,MAP3K1,MAP4K1,MCOLN1,MMP9,Mt1,MYC,NAGPA,NAPSA,NEU1,NFE2L2,NPC2,OGDH,PCNA,PDCD4,PLA…	456 (17)
doxorubicin		chemical drug		-0.866		6.09e-14	ABCB8,ADORA2B,ANXA1,APEX1,ATF3,AURKA,AURKB,BAX,BCAP31,BCL2A1,BIRC5,BTG1,BTG2,BUB1B,CASP8,CAT,Ccl2,CCNB1,CCNB2,CD14,CD40,CD44,CDK1,CDKN1A,CDKN3,CENPA,CKAP4,CTSB,CYBB,DDX1,DPAGT1,DUSP1,EEF1A1,EEF1B2,EGR1,EIF5A,EMP3,FAS,GADD45A,H2AFX,IL1B,IRF5,JUN,KIF20A,LCN2,LGALS3,LGALS3BP,LXN,MAD2L1,MCM3,Ms4a6b,MVP,MYC,NCAM1,NFE2L2,P4HB,PCNA,PLK1,PRC1,PRDX1,PSAP,PSMB10,PSMB8,PTTG1,RAC2,RBM3,RRM1,S100A10,SESN1,SLC…	699 (21)
PD98059		chemical - kinase inhibitor	Inhibited	-2.622	bias	8.25e-14	ACAT2,ACOT7,ADIPOR1,ANXA1,ATF3,BAX,BCL6,BIRC5,C3,CAMP,Ccl2,CCNA2,CCNB1,CCR1,CCR2,CD14,CD37,CD40,CD44,CD55,CD74,CDKN1A,CDKN1B,CEBPD,CTSB,CTSH,CXCR4,CYCS,DHRS3,DUSP1,ECE1,EEF1A1,EGR1,EMP1,EMP3,ENO1,FAS,FN1,FPR2,GADD45A,GAS7,GPI,GRN,HADHB,HNRNPA2B1,HSPA5,ICAM1,IL1B,IL1RN,INSIG1,ITGAM,ITGB2,JUN,JUNB,KIF22,LAMP1,MAT2A,MGLL,MIF,MMP9,MSR1,MXD1,MYC,NOP56,NR4A1,OSM,PABPC1,PCNA,PLAUR,PNP,PPP1R15A,RAN,RETSA…	600 (17)
FOXO3		transcription regulator		-1.542		1.16e-13	ANXA1,ANXA3,APEX1,AURKA,BAX,BCL6,BIRC5,BTG1,BUB1B,CASP8,CAT,CCNB1,CCNB2,CDC20,CDCA8,CDK4,CDKN1A,CDKN1B,CDKN3,CDT1,CERS5,CLDN1,CTSB,CTSV,CXCR4,EGR1,FABP5,FN1,GADD45A,GMNN,GPX1,HBP1,ICAM1,IMPDH2,INHBA,ITGAM,ITGB2,JUNB,LCN2,MAX,MBNL1,MCM2,MCM7,MMP9,Mt1,MXD1,MYC,NT5E,NUPR1,OPTN,PCNA,PLK1,PPP1R15A,PRCP,PRDX3,PRDX5,PTTG1,RTN3,RUVBL1,SESN1,SLC40A1,SOD1,TIPIN,TNFRSF1A,TP53,TXN2,TXNIP,UBE2C,UCP2,VCAM1,VIM	733 (23)
dihydrotestosterone		chemical - endogenous mammalian	Activated	2.03	bias	1.3e-13	ACO2,ATP13A2,BAX,BCAP31,BTG2,BUB1B,CACYBP,CANX,CASP8,CCNA2,CCNB1,CCT3,CD63,CD74,CDC20,CDKN1A,CDKN1B,CIAO2A,CYBB,DBI,DCTPP1,DPM3,EGR1,ENO1,FAM89B,FKBP4,FN1,FTL,G0S2,GAPDH,GLRX3,GPI,GPX3,GRN,GSN,GSTP1,HINT1,HLA-A,HMGN1,HSP90AA1,HSPA1A/HSPA1B,Ifi202b,JUN,LGALS1,LY6E,MCM5,MGLL,MMP9,Mt1,MYC,NCF1,NR4A1,NUCB1,PA2G4,PDCD4,PEA15,PFN1,PHB,PHGDH,POLR2D,PREP,PROS1,RAB27A,RPL12,RPL19,RPL27,RPL28,RPL3,RPL30,RP…	790 (21)
CSF3		cytokine	Inhibited	-2.805		2.06e-13	ARHGDIA,BATF,BAX,BIRC5,C3AR1,CAPG,Ccl2,CD14,CD177,CD300LF,CD44,CDK4,CDKN1B,CEBPE,CSF3R,CX3CR1,CXCR2,CXCR4,CYBB,EGR1,FCGR1A,FPR1,GADD45A,GPR183,HDC,HLA-DQA1,HSPD1,ICAM1,IK,IL1RN,ITGAM,ITGB2,JUN,LCN2,LTB,LTF,Ly6a (includes others),MMP8,MMP9,MYC,NME2,PLSCR1,RAB27A,RARA,STAT3,TNFRSF1A,TP53,VCAM1	437 (15)
EGFR		kinase	Activated	2.909	bias	3.59e-13	ACOT7,ANXA1,BAX,BCL6,BIRC5,BTG1,CAPZA2,CCNA2,CCT5,CDK1,CDK4,CDKN1A,CDKN1B,CXCR4,DUSP1,EGR1,EIF4E,EIF5A,EIF6,ENOPH1,EXOSC5,GADD45A,GRN,HDC,HNRNPA2B1,HNRNPK,HP,HSP90B1,HSPA5,HSPE1,ICAM1,IER2,IGBP1,IL1B,IVNS1ABP,JUN,JUNB,LCN2,MMP9,MTA2,MYC,NDUFB8,NSF,NSUN2,NUDC,PA2G4,PABPC1,PARP2,PCNA,PLAUR,PLK1,PPIA,PROM1,PSMB1,PSMB2,PSMB3,PSMB4,PSMB5,PSMB6,PSMB7,RANBP1,RBBP7,SDF2L1,SDHB,SERBP1,SLC2A3,SLPI,STAT3,TC…	755 (18)
CST5		other	Inhibited	-2.087	bias	3.67e-13	ACAT2,ADRM1,AHNAK,ANXA3,ANXA5,ANXA6,BCAP31,BLOC1S1,C17orf49,CD44,CNBP,COPS7A,CTSB,DDT,DKC1,DNAJA3,DNAJB11,EEF1B2,EEF1D,EEF1G,EIF2B1,EIF2B2,EMP3,GDA,GEMIN7,HNRNPA2B1,IGBP1,INTS4,LIMD2,MALSU1,MAP1S,MAPK13,MRTO4,MVP,NDUFC2,NHP2,NOP10,NRP1,NT5E,NUDT16L1,PCBP1,PRDX1,PRDX2,PUF60,PUS1,RBM3,REEP5,RNASEH2B,RPF2,RSL1D1,RTN3,SLC9A3R2,SSRP1,TBL3,TOMM40,VARS,VASP,VCAN,VDAC1,VDAC2,VIM,WDR3,WDR36
E2F4		transcription regulator		-1.067		6.36e-13	ALG5,ASF1B,AURKB,BUB3,CASP6,CCNA2,CDCA4,CDK1,CDKN1A,CENPA,CKS1B,CSDE1,DDB1,EIF2B2,EMC4,EXOSC8,FAS,FEN1,GMNN,GOLT1B,H2AFX,H2AFZ,HIST1H2AC,HIST1H3B,HIST2H2AA3/HIST2H2AA4,HP,HSP90B1,KIF22,MAD2L1,MCM3,MCM5,MCM6,MRTO4,MYC,NPM1,PCNA,PLK1,PLSCR1,PRC1,PRKCSH,PRPSAP1,PSAT1,PTTG1,RANBP1,RFC3,RFC4,RRM1,STMN1,TK1,TMPO,TOP2A,TP53,UBE2C,UHRF1,XPC	455 (7)
let-7		microRNA	Inhibited	-3.533	bias	6.41e-13	ALDH1B1,AURKA,AURKB,BTG2,BUB1B,CCNA2,CCNB1,CD44,CDC16,CDC20,CDCA3,CDCA8,CDK1,CDT1,CEBPD,CKS1B,EIF4A1,FBL,FN1,GMNN,GPI,IL6R,ITGA1,LIN28A,MAD2L1,MCM2,MCM3,MCM5,MCM6,MCM7,MRTO4,MYC,NAP1L1,PA2G4,PAICS,PLAUR,PROM1,RBM38,RFC3,RFC4,RFC5,RRM1,S100A4,SIGMAR1,SSR1,STAT3,TARBP2,THBS1,TRAP1,TRIB1,VIM	635 (16)
cardiotoxin		chemical - other		0.229	bias	7.35e-13	APRT,ATP6V1A,BIRC5,C5AR1,Ccl2,Ccl6,Ccl9,CCNA2,CCR1,CCR2,CD180,CSF3R,CTSV,CXCR4,FBL,FEN1,GM2A,GMNN,HSP90AA1,HSPA5,IL1B,IL1RN,IL6R,ITGB2,ITGB7,KARS,KPNA2,LRRFIP1,LY86,MCM2,MCM3,MCM7,MYH9,NPM1,OSTF1,PCNA,PGAM1,RANBP1,RPSA,SNRPD1,SNX5,STAT3,UCP2
FOXO1		transcription regulator	Activated	2.207	bias	7.87e-13	ADIPOR1,ANXA3,Atp5e,ATP5F1B,ATP5MC3,ATP5PF,ATP6V0B,BAX,BCL2A1,BID,BIRC5,CASP6,CASP8,CAT,CCNA2,CCNB1,CCNB2,CD40,CDK1,CDK5RAP3,CDKN1A,CDKN1B,CDKN2AIPNL,CERS5,CS,CTSV,CYCS,DNAJC19,EGR1,FABP5,FAS,FDPS,FN1,GADD45A,GPI,HAL,HSP90AB1,HSPA5,HSPD1,ICAM1,IL17RA,IL1B,IRF5,ITGAM,ITGB2,JUN,JUNB,KLF7,MAVS,MCM5,MMP9,MRPL14,MRPS12,MRPS14,MRPS18A,MRPS22,MRPS30,MRPS7,MVD,MYC,NDUFA12,NDUFA4,NDUFA9,NUSAP1,PDHB,PLSCR1…	520 (18)
KITLG		growth factor		-0.219	bias	8.24e-13	AIF1,ALOX5,ATP6V1B2,BIRC5,BTG1,Ccl2,CCNA2,CD14,Cd24a,CD3D,CD68,CDKN1A,CDKN1B,CLIC1,CSF3R,CXCR4,EEF1A1,EGR1,FABP5,HCK,HNRNPF,Ifi27l2a/Ifi27l2b,IK,IL16,IL1B,IL1RN,KPNA2,LTF,LY6E,MID1IP1,NPM1,OSM,PDCD4,PGLS,PLSCR1,PSMB5,PTGES3,RBBP7,RPL7,RPLP0,RPS23,Rps3a1,RPS6,RPS7,SDHC,SNAP23,Snrpg,Srgn,STAT3,TNFRSF1A,TPT1,TSC22D3,TXNIP,TXNL1,UCP2,ZNF207	474 (19)
Immunoglobulin		complex		0.215		9.32e-13	ACSL1,ADIPOR1,AIF1,BATF,BCL2A1,BCL6,BIRC5,C3AR1,CALR,CAPG,Ccl2,Ccl9,CCR2,CD40,CD44,CD68,CD74,CDK4,CDKN1B,CEBPD,CFP,CRISPLD2,CTSZ,CXCR2,CXCR4,DPYSL2,DUSP1,EBI3,EGR1,EIF2A,FAIM,FAS,FCGR1A,FCGR2A,FCGR3A/FCGR3B,FPR1,GAS7,Gm16894,GPX1,HAL,HCK,HK3,HLA-DQB1,ICAM1,IFI30,IL1B,IL1R2,IMPDH2,INHBA,IRF5,JUP,Ly6a (includes others),MMP9,MYC,NCF2,NLRP3,NR4A1,NRP1,NT5E,OGT,OSM,PDIA6,PDLIM4,PLSCR1,PRDX1,PRDX5,RPS1…	519 (16)
bortezomib		chemical drug	Activated	3.79		9.94e-13	ASF1B,ATF3,BAX,BCL2A1,BIRC5,CALR,CASP8,Ccl2,Ccl9,CCNB1,CDK4,CDKN1A,CDKN1B,CXCR4,FAS,GADD45A,HDAC3,HSP90AA1,HSP90B1,HSPA1A/HSPA1B,HSPA5,HSPE1,ICAM1,IL1B,MAX,MYC,NSFL1C,PCNA,PPP1R15A,PSMA1,PSMA2,PSMA3,PSMA5,PSMA6,PSMA7,PSMB3,PSMB4,PSMB5,PSMB7,PSMC1,PSMC4,PSMC6,PSMD11,PSMD12,PSMD13,PSMD14,PSMD2,PSMD3,PSMD4,PSMD6,RAF1,SQSTM1,TP53,VCAM1,VIM,XBP1	663 (18)
AGN194204		chemical drug	Activated	2.049	bias	3.79e-12	ACAA2,ACAT2,ANAPC5,ANXA11,ATF3,AURKA,BCL2A1,CCNA2,CCNB1,Cd24a,CDK1,CDKN1A,DUSP1,EMP1,EMP3,FDPS,GADD45A,GAPDH,GPR65,H2AFX,H2AFZ,HIST1H1C,Hmgn2 (includes others),Ifi47,IFITM3,IL1R2,ITGB2,ITGB7,KIF20A,LAMP1,LGALS1,LMNA,MAD2L1,MMP9,MYC,NPC2,PDCD4,PLAC8,PLK1,PRC1,PROS1,RGS10,TOP2A,XBP1	621 (16)
DYSF		other				3.85e-12	ACTG1,ANXA1,CD48,CD55,CD68,CD74,CORO1C,CTSH,CTSS,CTSV,EVI2A,FN1,FTL,GPR65,HLA-A,HLA-DQA1,HLA-DQB1,HLA-DRB5,HSPA1A/HSPA1B,IDH3A,IFI16,Ifi202b,LCP1,LGALS3,MPEG1,PROS1,PSAP,S100A4,TMEM123
lactacystin		chemical - protease inhibitor		1.548		4.87e-12	ADRB2,AKR1B1,ARHGDIB,ATF3,Ccl2,CCRL2,CCT2,CD9,CDKN1A,CDKN1B,CFL1,CLIC1,CXCR4,DUSP1,EIF4E,EIF5A,FAS,FTL,GBA,GSTP1,HLA-A,HNRNPA2B1,HSP90B1,HSPA5,IFRD1,MMP9,MRTO4,NEDD8,NEDD9,NFE2L2,NR4A1,OPTN,PEA15,PEBP1,PFN1,PPIA,PPP5C,PXN,RANBP1,RANGAP1,RPLP0,RPLP2,SH3BGRL,SQSTM1,STMN1,SUB1,TACSTD2,TP53,TUBB2A	677 (19)
hydrogen peroxide		chemical - endogenous mammalian	Activated	2.031	bias	5.12e-12	ACAT2,ALOX5,APEX1,ATF3,ATP6V1A,AURKA,BAX,BCL2A1,BIRC5,BSG,BTG2,BUB1B,CAT,Ccl2,CCNA2,CCNB1,CCR2,CD55,CD63,CD68,CD81,CDK1,CDKN1A,CDKN1B,CKS1B,CSF3R,CTSB,CTSS,CXCR4,CYCS,DPAGT1,DUSP1,EEF1A1,EEF1B2,EGR1,FAS,FDPS,FN1,GADD45A,GLRX,GPX1,H2AFX,HDC,HSPA5,ICAM1,IL1B,INSIG1,JUN,LCN2,LTB4R,MCM2,MIF,MMP8,MMP9,MSR1,MYC,NFE2L2,NR4A1,PARK7,PDCD4,PDIA3,PDIA4,PLAUR,PPP1CA,PRDX1,PRDX2,PRKCSH,PSMC4,PTP4A2,RAB27A,RAN…	828 (20)
MEL T1		chemical - kinase inhibitor		-0.277		5.28e-12	ATP5F1B,ATP5F1D,C1QBP,CFL1,COX5A,ENO1,FH,HSPA1A/HSPA1B,HSPD1,PGAM1,PGK1,PRDX1,PSMA1
TSC2		other	Inhibited	-3.061	bias	6.26e-12	ANXA1,ATF3,ATP6V0B,ATP6V1A,ATP6V1B2,BAX,BIRC5,Ccl2,CD68,CDKN1A,CDKN1B,CRIP1,DPP7,EGR1,EMP3,FAM129A,GSN,HSPA5,IFITM3,LGALS3,Mt1,NEU1,PLP2,PSMA1,PSMB1,PSMB2,PSMB5,PSMC3,PSMD1,PSMD14,RASSF4,Rpl32,SCPEP1,SMPDL3A,TMEM176A,TMEM176B,UCP2	692 (18)
IgG		complex		-1.623	bias	6.92e-12	ASAH1,ATP1B3,C3,CALR,Ccl2,CD40,CD9,CDKN1A,CEBPD,CTSC,CYP27A1,DUSP1,EMP1,FABP5,FCGR1A,FCGR2A,FN1,GPX1,GUK1,HLA-E,HSPA5,IER2,IFITM3,IL16,IL1B,IL1RN,ITGAM,LCN2,LGALS1,LGALS3,Ly6a (includes others),LY9,MMP9,MYC,PEA15,PLAUR,PPIF,PPP1R15A,RND3,SLC2A3,TACSTD2,TNFRSF13B,TUBB2A,VCAM1,ZMPSTE24	519 (16)
IL2		cytokine		1.503	bias	7.39e-12	ADAM8,ANXA1,ARHGAP25,ARHGDIA,BAX,BCCIP,BCL2A1,BCL6,C3,CAPG,Ccl2,Ccl9,CCR1,CCR2,CD3D,CD40,CD44,CD74,CD9,CDK4,CDKN1A,CDKN1B,CEACAM1,CFP,CTSC,CX3CR1,CXCR4,CYCS,CYP27A1,CYSLTR1,DKC1,EMP1,FAS,FCGR3A/FCGR3B,FGL2,FPR2,GAPDH,GARS,Gm16894,GRN,HCK,HCST,HIST1H1C,HSP90B1,HSPA1A/HSPA1B,HSPA5,HSPD1,ICAM1,IFNGR1,IL18BP,IL18RAP,IL1B,IL1R2,ITGA1,ITGB7,JUN,LTB,LTB4R,Ly6a (includes others),LY6E,MMP25,MMP9,MYC,NDUFA…	481 (17)
tanespimycin		chemical drug		-1.508	bias	1.06e-11	ARRB2,BCL2A1,BIRC5,CAPN1,CDK1,CDK4,CDKN1A,CDKN1B,CYCS,EIF4A1,FAS,HAT1,HNRNPA2B1,HNRNPM,HSP90AB1,HSP90B1,HSPA1A/HSPA1B,HSPA5,HSPA8,HSPA9,IL6R,JUN,MIF,MYC,OSM,PRDX3,PSMA7,RAF1,RPL24,RPL27A,RPL30,RPL35,RPS16,RPS8,SNRPB,SNRPF,STAT3	819 (23)
camptothecin		chemical drug	Activated	2.903		1.07e-11	ANXA4,API5,ARHGDIA,ARHGEF1,ARRB2,ATF3,AURKA,BAX,BCL2A1,BID,BIRC5,BTG2,CASP8,CCNB1,CCR1,CCRL2,CD40,CD48,CDK1,CDK4,CDKN1A,CXCR2,DDX39B,DPAGT1,EEF1A1,EEF1B2,F5,FAS,FGL2,FKBP3,FPR1,GADD45A,GAPDH,GPI,GRINA,H2AFX,H3F3A/H3F3B,HIST1H3B,HLA-A,HLA-DQA1,HLA-DQB1,HLA-E,HLA-G,HSPA5,ICAM1,IFI16,IL16,IL17RA,IL1B,IMP3,INSIG1,JUN,LGALS3,LITAF,LY75,MBOAT7,MMP9,Mt1,MYC,NR4A1,NRP1,OLFM4,OPTN,OSM,OSTF1,P2RX4,PCNA,PDL…	638 (16)
FOXM1		transcription regulator	Activated	3.801	bias	1.4e-11	ANXA1,AURKB,BIRC5,BUB1B,CAT,CCNA2,CCNB1,CCNB2,CDC20,CDCA8,CDK1,CDKN1A,CDKN1B,CDKN3,CENPA,CKS1B,IL1RN,IPO7,JUN,KIF20A,MMP9,MYC,PCNA,PGK1,PLAUR,PLK1,PRC1,PRDX2,PROM1,PTTG1,SQSTM1,STAT3,STMN1,TOP2A,TP53,VCAN,VIM,ZEB2	720 (21)
NFKBIA		transcription regulator		-0.301		1.45e-11	ATP5MF,AURKB,BAX,BCCIP,BCL2A1,BID,BTG2,BUB1B,C3,CAMP,CAPZA2,CASP8,Ccl2,Ccl9,CCNA2,CCNB1,CCR1,CD40,CD82,CDKN1A,CDKN2D,CEBPD,CKS1B,CTNNA1,CTSB,CTSZ,CXCR4,FAS,FN1,GADD45A,GATD3A/GATD3B,Gm21596/Hmgb1,GM2A,GPX3,GRN,HLA-A,Hnrnpa1,HPSE,HSPA5,HSPA8,ICAM1,IFI16,IL1B,IL1RN,JUN,JUNB,LCN2,LIN28A,LITAF,LY6E,MMP9,MPDU1,Mt1,MYC,NLRP12,NR4A1,PARK7,PCNA,PDLIM1,PEA15,POLB,POLR2C,PTP4A2,RPL27A,RPL8,RPS18,RPS2,RPSA,…	577 (18)
GnRH analog		biologic drug	Inhibited	-3.064		2.2e-11	ACAA2,ACOT7,ADAM8,ANXA11,ATF3,ATP5F1A,BCL2A1,BUB3,CALR,CASP8,CD40,CDK1,CKS1B,CLTA,CYC1,DDOST,DUSP1,EIF2B2,EXT2,FAS,FKBP1A,FN1,GATD3A/GATD3B,GDI2,GPSM2,GSTO1,HADHB,HINT1,HSP90AB1,IK,INHBA,JUN,KLF7,NADK,NARS,NDUFB5,NDUFS7,NDUFV2,NME2,OGFR,PABPC1,POLR2E,PPIA,PRCP,PSMA6,PSMB3,PSMB4,PSMB7,PSMD1,PSMD13,RAN,RARA,SLC2A3,SNRPD3,SNX3,SRI,SRSF3,SSR1,TMBIM6,TP53,TUBA1A,TYK2,UBE2V1,UQCRB,UROD,VCP,YIF1A	528 (16)
MTOR		kinase		-0.071		2.24e-11	ACADL,ADPGK,AKR1A1,AKR1B1,ATP5MG,ATP5PB,BIRC5,CASP8,CD40,CDKN1A,CEBPD,CNP,COX4I1,CS,CXCR4,CYCS,EIF3A,ENO1,ERCC1,ETFA,FABP5,FDPS,FKBP1A,FN1,GLUD1,HADHA,HADHB,HSD11B1,HSP90AB1,HSP90B1,IFI16,IL1B,MAP1LC3B,MDH1,MMP9,MYC,NCAM1,NDUFA6,NSUN2,OAS1,Otub1,PCNA,PFN1,PPIB,PRDX5,PSMB5,PTBP1,RPL12,RPL23,RPS11,RPS18,SERPINB1,SLC16A3,SND1,SOAT1,SOD1,SQSTM1,STAT3,TK1,TNFRSF1A,TNFSF13,TP53,TRADD,TXNIP,TXNL1,UBE2B,…	713 (19)
F2		peptidase		0.782	bias	2.3e-11	AKR1B1,ALDH1B1,BAX,BSG,CALR,Ccl2,Ccl9,CCNA2,CD44,CD55,CD63,CD68,CDKN1A,CDKN1B,CKAP4,CLIC1,CORO1C,CXCR4,CYBB,DHRS9,DUSP1,ECE1,EGR1,EHD4,EIF4A1,ERP29,FN1,HSP90AA1,ICAM1,IER2,IL1B,JUN,JUNB,LAMP1,MGLL,MIF,MMP9,MYC,MYH9,NCF1,NCF2,NUP62,OSM,PDIA4,PLAUR,PPIF,PROS1,RAC2,RNH1,SLC2A3,SRM,TAGLN2,THBS1,TMED9,TOMM40,VASP,VCAM1,YIF1A	662 (17)
resiquimod		chemical drug		-0.285	bias	2.43e-11	AIF1,ANXA4,ARL5C,ATF3,ATP5F1A,ATP5F1C,ATP5PF,ATP6V1B2,BATF,BCL2A1,CAT,Ccl2,Ccl9,CD40,CD44,Clec2d (includes others),CLEC4E,EBI3,FAS,FCGR1A,FCGR2A,FH,GM2A,GPX1,HHEX,ICAM1,IL16,IL1B,INHBA,JUN,LMNA,MRPS22,NFKBIZ,NLRP3,PARK7,PRDX1,PSMB2,PSMB4,PYCARD,STMN1,TMEM154,TNFSF13B,Tnfsf9,TRPM2,YWHAB	476 (15)
PDGF BB		complex		0.49	bias	3.55e-11	ACAT2,ADRB2,ANXA11,ARG2,ATF3,C3,Ccl2,CD44,CDK1,CDK4,CDKN1A,CDKN1B,CEBPD,CSRP2,CYCS,DGAT1,DUSP1,EGR1,EIF4E2,FN1,GADD45A,GDA,GPR183,HLA-E,HSD3B7,IER2,IL1B,INHBA,JUN,JUNB,KLF10,LGALS3,LMNA,MAT2A,MCM6,MGST1,MGST2,MMP9,Mt1,MYC,NDUFB8,NR4A1,PCNA,PDLIM1,PPP1R15A,PSMB4,RFC5,RND3,RPL13,RPN2,RPS14,RPS6,SLC2A3,SLC7A7,SRSF7,STAT3,SYNE1,TAF9,THBS1,TIMM17A,TP53,TRA2B,TRIB1,TRIOBP,VCAM1,VCAN	635 (17)
mir-223		microRNA	Inhibited	-2.418		6.12e-11	ABCA13,APOBEC1,ASPRV1,C15orf48,C5AR1,CD180,Cd33,Clec2d (includes others),Clec4b2,CLEC4E,EMP1,FGL2,Gm8615,GPR65,ICAM1,IFI16,Ifitm6,IL1B,IL1RN,Ly6a (includes others),MLKL,MMP25,MMP8,NLRP3,PADI4,PARP1,RASGRP4,RIPK3,S100A9,SCARB1,SLC39A1,SLC40A1,SOAT1,STAT3,Stfa2/Stfa2l1,STMN1,TGFBI	291 (7)
LDL		complex		0.834	bias	7.18e-11	ARG2,ATF3,BCL2A1,C3,CAPN1,CAPN2,CASP6,CASP8,Ccl2,CCR2,CD40,CD68,CDK1,CDKN1A,CX3CR1,CYBB,DUSP1,ECE1,EGR1,EMB,FAS,FCGR1A,FDPS,G0S2,GPR183,GPX1,HSP90B1,HSPA5,ICAM1,IL17RA,IL1B,IL1RN,INSIG1,JUN,LASP1,MMP8,MMP9,MSR1,NCF1,NLRP3,NME1,NPC2,NR4A1,PARP1,PSMC5,RANBP1,RARA,RNASEH1,RND3,S100A8,SCARB1,STAT3,TP53,TRADD,VCAM1,XBP1	516 (15)
PTGER2		G-protein coupled receptor		-0.057	bias	8.92e-11	AURKA,BUB1B,CCNA2,CCNB2,CDKN3,CFP,CKAP2L,CXCR2,CXCR4,ECM1,EGR1,ESD,FPR1,H2AFX,HDC,IL1B,IL1R2,IL36G,ITGAL,KIF20A,KIF22,MMP9,NUSAP1,PILRB,PLK1,PRC1,PXN,RACGAP1,Stfa2/Stfa2l1,TBL3,THBS1,TREM1	704 (18)
nitrofurantoin		chemical drug	Activated	2.803		8.95e-11	ACTG1,ANXA5,APEX1,ASS1,BAX,BTG2,C3,CAPN2,CASP6,CAT,CTSB,CTSS,CTSV,DBI,EEF1A1,EIF4E,FAS,GADD45A,GSTP1,HSD17B4,HSPA5,IFRD1,IL1B,LGALS3,Mt1,MYC,PCNA,PRDX1,PRDX2,RPL13,RPL13A,RPL27,RPL6,RPS8,RPS9,S100A10,SELENBP1,STMN1,TP53,TUBA1A,TUBB,VCAM1
PRL		cytokine	Activated	3.609	bias	1.25e-10	ANXA3,ANXA5,ATP5PD,BCL6,CAMK1,CAPN2,CCNB1,CD40,CDK4,CDKN1A,CEBPD,COX4I1,CTSA,CTSB,CTSH,CTSS,CTSV,DDX39B,ECM1,EGR1,ENO1,EPSTI1,FN1,HSPD1,IFI35,ITGA1,JUN,LY6E,MAFG,MGST1,MLKL,MYC,NUPR1,OAS1,OAS3,P4HB,PCNA,PDIA4,PDLIM4,PKIG,PLSCR1,PSME1,PSME2,RABAC1,RHOG,RNASE4,RPSA,SAMHD1,SCARB1,SHISA5,SND1,SOD1,TECR,Tmsb4x (includes others),TNFSF13B,TP53,TUBA1B,VIM	542 (18)
YY1		transcription regulator		-0.54		1.45e-10	API5,AURKA,AURKB,BIRC5,BTF3,BTG2,BUB1B,CALR,CAPG,CBX3,CCNA2,CCNB1,CCNB2,CD3D,CDCA3,CDKN1A,CENPA,Cox5b,CXCR4,CYBB,EEF1B2,EGR1,FAS,FDPS,FEN1,H2AFX,Hnrnpa1,HSPA5,IL1B,INCENP,KIF20A,KIF23,LMAN1,LMNB1,MAD2L1,MAT2A,MCM5,MCM6,MCM7,MYC,NFKBIZ,PCNA,PLK1,POLB,PPP1R15A,PRC1,RND3,RPL30,RRM1,SCARB1,SLC25A4,TACC3,TGFBI,TOP2A,TP53,Tpm1,UHRF1,YWHAE	672 (19)
TCF4		transcription regulator		0.555	bias	1.56e-10	ANXA6,ASF1B,BCL6,BIRC5,CCNA2,CCNB2,CD55,CDC20,CDCA3,CDK1,CDKN1A,CDKN3,CKAP4,Clec2d (includes others),CRELD2,DSTN,FGD2,FN1,H1F0,HCST,Hmgn2 (includes others),HSD11B1,HSP90B1,IFI16,JUN,Ly6a (includes others),MAD2L1,MANF,MORF4L2,MYC,OPTN,PDIA4,PDIA6,PLAC8,PRC1,PRDX4,RACGAP1,SDF2L1,SERPINB1,SLC35B1,SPCS2,SQSTM1,STAT3,SUB1,TXNDC5,VCAN,XBP1	645 (16)
APOE		transporter		-0.37	bias	1.59e-10	ACAT1,ACSL1,ANXA11,ATF3,BAX,C5AR1,C5AR2,CALR,CAMK1,CAT,Ccl2,CD40,CD44,CD68,CLEC4C,CTSB,CTSS,CTSV,CYBB,ECM1,EGR1,FCGR1A,FKBP4,GAS7,GPX3,HSD11B1,HSP90AB1,HSP90B1,HSPA1A/HSPA1B,HSPA5,HSPD1,ICAM1,IL1B,IL1RN,ITGAM,JUN,LCN2,LIPA,M6PR,MAP3K1,MMP9,MSR1,NCF1,NCF2,P4HB,PEA15,PPP1R15A,PSMC4,RPL10A,S100A8,S100A9,SCARB1,SLC27A4,SOD1,TIFA,TNFRSF14,TNFRSF1A,TREM2,TXNIP,UCP2,VCAM1,VCP,WBP2,XBP1	590 (19)
indomethacin		chemical drug		1.112		1.66e-10	ACSL1,ADAM8,ALOX5,ANXA1,ARG2,ATP6V0B,BAX,BIRC5,BSG,BTG2,CAPN2,Ccl2,CCNB1,CD14,CD44,CD55,CDKN1A,CDKN1B,CLDN1,COX8A,CXCR4,DGAT1,EMP3,FCGR2A,GBA,IFITM3,IL1B,ITGAM,LCN2,LGALS3,LXN,MANF,MCM3,MYC,P4HB,PCNA,PLAUR,PROM1,PSMB10,PSMB5,PSMB8,PSMB9,RBM3,RPS21,RPS28,S100A10,S100A8,TUBB,UCP2,UQCR10,VCAN,VIM,YWHAE	530 (17)
IL6		cytokine		-0.31	bias	1.79e-10	ADORA2B,AHNAK,ANXA1,ATF3,BATF,BAX,BCL6,BIRC5,BTG2,BUB1B,BUB3,C3,C5AR1,CAPRIN1,Ccl2,CCNA2,CCNB1,CCNB2,CCR1,CCR2,CD14,CD40,CD44,CD48,CD68,CD74,CD82,CDC20,CDK1,CDKN1A,CDKN1B,CDKN2D,CDKN3,CEACAM1,CEBPD,CENPA,CFH,CFP,CLEC10A,CLEC4E,COX4I1,CSF3R,CTSC,CX3CR1,CXCR4,CYBB,DUSP1,EGR1,FAS,FCGR1A,FFAR2,FN1,FPR2,FRRS1,GADD45A,GLRX,HLA-A,HLA-DMA,HLA-DQA1,HLA-DRB5,HP,HSPA5,ICAM1,IFI16,Ifi202b,IFITM3,IK,IL1RN,IL6…	537 (15)
IL1B	-1.654	cytokine	Inhibited	-2.2	bias	2.02e-10	ADAM8,ADORA2B,ADRB2,AIF1,AKR1B1,ANXA1,ARL6IP5,ASS1,ATF3,BAX,BCL2A1,BCL6,BTG2,C3,CAT,Ccl2,Ccl9,CCR1,CCR2,CCRL2,CD14,Cd24a,CD40,CD44,CD55,CD74,CD82,CDKN1A,CEBPD,CFB,CTSB,CTSS,CTSZ,CX3CR1,CXCR4,CYBB,CYSLTR1,DBI,DUSP1,EBI3,EGR1,EIF4E,F13A1,FABP5,FAM129A,FAS,FN1,FPR2,G0S2,GADD45A,GM2A,GRN,GTF2F1,GUSB,GYS1,HEXA,HEXB,HLA-A,HLA-E,Hmgn2 (includes others),HP,HPRT1,HSD11B1,HSPA1A/HSPA1B,HSPA5,ICAM1,IER2,IFI…	599 (19)
CDKN2A		transcription regulator	Inhibited	-3.757		2.03e-10	ANAPC5,ASF1B,AURKB,BAX,BIRC5,BTG2,BUB1B,C3,CAPG,Ccl2,Ccl6,Ccl9,CCNA2,CCNB1,CDCA4,CDK1,CDKN1A,CDKN1B,CDKN2D,CEBPD,CXCR2,DEK,DUSP1,EEF1A1,EGR1,FBL,FEN1,GAS7,H2AFX,IFI35,IL1B,IL1R2,JUN,LAMP1,LGALS3,MAD2L1,MCM5,MCM7,MYC,NPM1,PCNA,PLK1,POLD2,PSMA5,PSMB9,RAB27A,RBBP7,RFC3,RFC4,RRM1,SAE1,TCF19,TK1,TMEM97,TMPO,TNFRSF1A,TP53,VIM,VPS41,VRK1	683 (18)
CSF1		cytokine		1.779	bias	2.32e-10	BAX,BIRC5,Ccl2,CCNB1,CD68,CDK4,CDKN1A,CDKN1B,CYBB,DUSP1,EBP,EGR1,ENO1,FAS,FCGR2A,FCGR3A/FCGR3B,FDPS,FN1,GOT2,GPI,HSP90B1,HSPA5,IFNGR1,IL18BP,IL1B,IRF5,IRF8,ITGAM,JUN,JUNB,MAFB,MMP9,MSR1,MVD,MYC,NCF2,PCNA,SIRPB1,SLC16A3,SLC1A5,SLFN12L,SQLE,THBS1,TNFRSF1A,TP53,TPI1,TPT1,VCAM1,XBP1	483 (18)
IL13		cytokine		0.568		2.32e-10	ACSL1,ADAM15,ADAM8,ADORA2B,ARG2,ATF3,BATF,BAX,BCL2A1,BID,BLVRA,C3,C3AR1,CAPN2,CASP6,CASP8,Ccl2,Ccl6,CD101,CD14,CD37,CD40,CD44,CD48,CLEC10A,CLEC4E,CTSB,CTSC,CTSH,CTSS,CTSV,CXCR2,CXCR4,CYBB,CYSLTR1,DNASE2,EGR1,F13A1,FAM162A,FAS,FCGR1A,FCGR2A,FGD2,FKBP1A,FPR2,FZR1,G0S2,GAS7,GPX3,GSN,HDC,HPSE,HSD11B1,ICAM1,IFNGR1,IL1B,IL1R2,IL1RN,LIPA,LTA4H,MMP9,NCAPH,NCLN,PID1,S100A8,SLC7A7,SLPI,SYNGR2,TFEC,THBS1,TN…	502 (15)
HSF2		transcription regulator	Activated	3.638	bias	3.32e-10	CCT2,CCT3,CCT4,CCT5,CCT6A,CCT7,CCT8,HSPA1A/HSPA1B,HSPA4,IL1B,JUN,PSMA1,PSMA5,PSMB2,PSMB5,PSMC4,PSMD3,TCP1
FOS		transcription regulator		0.796		3.38e-10	ACTG1,ANXA4,APLP2,ATF3,BLMH,C3AR1,CAMP,CAPN2,CAT,CCNA2,CD14,CD44,CD68,CTSB,CTSH,CTSV,CYCS,EGR1,EMB,ENO1,ERCC1,FN1,GBA,GM2A,GPSM2,GSTP1,HSD17B10,HSP90B1,HSPA5,ICAM1,IL36G,JUN,JUNB,LGALS3,LGALS3BP,MALAT1,MCM5,MGST1,MMP8,MMP9,MXD1,MYC,MYH9,NCF2,NDUFS7,NFE2L2,NR4A1,NUBP1,PCYT2,PFN1,PLAUR,Ppp2r5c,PRDX1,PSMA2,PSMA7,PSMB3,PTP4A2,PTPRO,PTTG1,RARA,RBBP7,RNH1,RPL39,RPL9,RPLP0,RPS18,RPS24,RPS6,RPS7,RPS9,S10…	805 (18)
ANGPT2		growth factor	Activated	3.979	bias	4.24e-10	CALR,CAT,Ccl2,CCT7,CD68,CDKN1A,CFB,COMT,EEF1B2,EXT2,FAS,FEN1,FKBP2,FKBP4,FN1,HSP90AA1,HSPA1A/HSPA1B,HSPA4,HSPA5,HSPD1,ICAM1,IL1B,KDM6B,KPNA2,MGST1,MIF,MMP9,NCF1,NDE1,NME1,P4HB,PDCD4,PDIA3,PDIA6,PROS1,RFC4,RPS6,SOD1,ST13,THBS1,TP53,TXNIP,UBE2A,VCAM1,VIM	776 (20)
TCF3		transcription regulator	Inhibited	-2.327		5.17e-10	ANXA6,ASF1B,ATF3,AURKA,BCL6,BID,BIRC5,CASP6,CCNA2,CCNB1,CCNB2,CCS,CD55,CDC20,CDCA3,CDK1,CDKN1A,CDKN3,CKAP4,Clec2d (includes others),CRELD2,CTSV,DSTN,FGD2,GADD45A,GM2A,H1F0,H2AFX,HADHA,HCST,Hmgn2 (includes others),HSD11B1,HSP90B1,IFI16,IL1B,JUN,LMO4,Ly6a (includes others),MAD2L1,MANF,MORF4L2,MYC,NUSAP1,OPTN,PAFAH1B3,PDIA4,PDIA6,PGK1,PLAC8,PRC1,PRDX2,PRDX4,PSAP,RACGAP1,RASA4,RASSF4,SDF2L1,SERPINB1,…	472 (13)
WR 1065		chemical drug	Activated	2.383	bias	5.58e-10	BAX,CAT,CDKN1A,EIF2B1,ERCC1,FAS,GADD45A,HDAC3,MYC,NEDD8,NME1,RFC4,S100A4,TP53,XPC	712 (20)
dextran sulfate		chemical drug		-1.483	bias	5.74e-10	ADAM8,ADORA2B,AURKA,BIRC5,BUB1B,C3,Ccl2,CCNA2,CCNB1,CCR2,CD14,CD177,CD40,CD74,CDC20,CDCA3,CDCA8,CDK1,CFH,CKS1B,CXCR2,ICAM1,IFITM3,IL1B,IL36G,LCP1,MCM3,MCM5,MCM6,MMP9,MSR1,MYC,NCAPH,NRP1,NUSAP1,PARP1,PARP2,PCNA,PHGDH,PLK1,PRC1,RACGAP1,S100A8,S100A9,Slfn2,STAT3,STEAP3,STMN1,THBS1,TOP2A,UBE2C,UHRF1,VCAM1	496 (14)
CD28		transmembrane receptor	Activated	3.098	bias	5.83e-10	ANXA1,ARHGDIB,ATP5F1C,BCL2A1,BIN1,BTG1,BZW1,CASP6,CASP8,CDK4,CDKN1B,CS,CXCR4,CYC1,CYCS,DAD1,DUSP22,EBI3,EIF4E,FBL,FDPS,FKBP2,GAPDH,GYS1,H2AFY,HAT1,HINT1,HIST1H2AC,HIST2H2AA3/HIST2H2AA4,HLA-DQB1,HMGN1,HSPA1A/HSPA1B,HSPA8,IFNGR1,IL1B,IRF8,ITGAL,ITGB7,JUN,KDELR2,LCP1,MSR1,Mx1,MYC,NR4A1,OAZ1,PGAM1,PHB,PHB2,PNP,PPA1,PRDX4,PSMA5,PSMA6,PSMD12,RPL30,RPL6,RPS14,SEC61B,SLC16A3,SLC25A5,SNRPB,SSB,STAT3,STOM,…	672 (19)
fulvestrant		chemical drug		-0.048		6.14e-10	ADRB2,AIMP1,ATP5F1B,AURKA,BAX,BIRC5,C3,Ccl2,CCNA2,CCNB1,CD74,CDC20,CDK1,CDKN1A,CDKN1B,CKS1B,CNBP,COMT,CYCS,EGR1,FEN1,FKBP1A,GADD45A,GSTP1,H2AFX,ICAM1,IL1B,JUN,KLF10,LTF,MANF,MCM2,MCM3,MCM5,MCM7,MYC,NME1,NRP1,NSUN2,PCNA,PDCD4,PRPS1,PTTG1,RFC5,RRM1,SLC25A5,SOD1,SQSTM1,STAT3,STMN1,TK1,TP53,TSC22D3,UBE2C,VCAM1	773 (25)
IL10RA		transmembrane receptor		1.46		6.5e-10	ACSL1,ALDH2,ALOX5,ARG2,ASS1,BAX,C3,Cd24a,CD300LF,CD40,CDKN2D,CFB,CLEC4E,CLEC5A,CSF3R,CSRP2,CYFIP2,ECM1,F10,F13A1,FABP5,FAS,FN1,GDA,HK3,HLA-A,HPSE,HSPA8,IFI16,Ifi47,IL18BP,IL1B,IL1RN,INHBA,ITGAM,ITGB7,Klrk1,LCN2,LMO4,LRG1,Ly6a (includes others),MLKL,MMP25,MSRB1,PDE2A,PSMB8,PSMB9,PYGL,RIPK3,SAMHD1,SELENBP1,SIRPB1,SLC16A3,Slfn1,STAT3,TFEC,TNFRSF14,TREM1,TREM3,Treml4,TRPM2	372 (13)
EPO		cytokine		1.178	bias	6.94e-10	ABCA13,ATP6V1B2,BAX,BCL6,BTG1,CDKN1A,CDKN1B,CHIT1,CLIC1,CTSZ,CXCR4,EEF1A1,EGR1,FABP5,FAS,FPR1,GBA,H2AFY,H2AFZ,HK3,HMGN1,HNRNPF,Ifi27l2a/Ifi27l2b,JUN,JUNB,KPNA2,LCP1,LY6E,MID1IP1,MYC,NACA,NPM1,NUPR1,OSM,PBXIP1,PCNA,PDCD4,RPL7,RPLP0,RPS23,Rps3a1,RPS4Y1,RPS6,RPS7,SDHC,SNAP23,Snrpg,SOD1,Srgn,SSRP1,STAT3,TP53,TPI1,TPT1,TSC22D3,TXNIP,UCP2,XPC	707 (18)
MMP12		peptidase				1.05e-09	CAPZA1,CAPZA2,CCT5,CORO1C,CXCR2,EIF3F,MMP9,MYH9,PSAP,PSMA1,PSMA3,PSMA5,PSMA6,PSMB2,PSMB7,PSMC3,PSMD1,PSMD11,PSMD14,TBCA,Tnfsf9,VCP,YWHAH
TNFSF11		cytokine		0.279	bias	1.15e-09	ADORA2B,AIF1,AURKA,BCL2A1,BSG,C3AR1,CAPN2,Ccl2,Ccl9,CCR1,CD14,CD300LF,CD40,CD44,CDKN1A,CDKN1B,CLEC4E,DUSP1,ELP2,FAS,FGR,FPR1,FRRS1,GLRX,GRN,HCK,HCLS1,ICAM1,IFRD1,IL1B,IL1RN,ILF3,IRF8,ITGAL,ITGAM,JUN,JUNB,KEAP1,MAFB,MMP9,MYC,NFKBIZ,PA2G4,PAG1,PLAUR,PLK1,RACGAP1,SIGMAR1,SLC7A7,Slfn2,STMN1,Tnfsf9,VCAM1,VRK1	740 (18)
RABL6		other	Activated	4.085	bias	1.49e-09	AURKB,BTG2,BUB1B,CCNA2,CCNB1,CKS1B,FEN1,H2AFX,KIF23,MAD2L1,MCM2,MCM5,MCM7,MYC,PARP2,PLK1,PRC1,RFC3,TMEM97,TOP2A,TP53,UBE2C,VRK1	472 (7)
cholesterol		chemical - endogenous mammalian		-1.733		1.65e-09	ACAT1,ACSL1,ATF3,BSG,C15orf48,Ccl2,CCR2,CD14,CD68,CLEC5A,CYBB,CYP27A1,DBI,FABP5,FDPS,FN1,GBA,HLA-DRB5,HSP90B1,HSPA5,ICAM1,IL1B,IL1RN,INHBA,INSIG1,ITGAM,LGALS3,MANF,MAP1LC3B,MMP8,MPEG1,NCF2,NR4A1,Orm1 (includes others),PCYT2,PSAT1,RGCC,RPL36AL,RPS28,S100A8,SCARB1,SQLE,THBS1,TMEM123,Tpm1,UQCRHL,VCAM1,XBP1	584 (19)
prostaglandin J2		chemical - endogenous mammalian	Activated	3.952	bias	2.09e-09	CDKN1A,HSPA1A/HSPA1B,PSMA2,PSMA3,PSMA5,PSMA6,PSMB2,PSMB3,PSMB4,PSMB7,PSMC5,PSMD1,PSMD12,PSMD3,PSMD6,PSMD8	391 (12)
butyric acid		chemical - endogenous mammalian		-0.619		2.13e-09	ALOX5,ANXA1,ANXA5,ATP5MC3,BAX,BCL2A1,BIRC5,CAMP,CAP1,CCNA2,CCNB1,CCNB2,CCR1,CD44,CD81,CD82,CDC16,CDC20,CDK1,CDK4,CDKN1A,CDKN1B,CKS1B,CLDN1,COX6A1,CXCR4,CYCS,DEK,DUSP1,EMP3,F10,FFAR2,G0S2,GAA,GADD45A,GDI1,GRN,GSN,GSTP1,H2AFZ,HADHB,HIST1H1C,ICAM1,IFI16,IFI30,IFNAR2,IL18BP,IL1B,IQGAP1,ITGAM,ITGB7,LY6E,MAPK13,MMP9,MVP,MXD1,MYC,NEU1,NME1,NPM1,NR4A1,NRP1,NUCB1,PCNA,PDIA3,PHB,PLSCR1,PRDX1,PSAP,PYGL,RAF1…	777 (23)
CCL5		cytokine		-0.218	bias	2.31e-09	AIF1,C5AR1,CAPN2,Ccl2,CCR1,CCRL2,CD40,CD44,CDC37,DUSP1,EMP1,HDC,IER2,IL1B,ITGAM,MMP9,PLAUR,PNP,PPIF,SOD1,SQLE,STAT3,THBS1,TUBB4B,VASP	665 (19)
CEBPA		transcription regulator	Inhibited	-2.125		2.36e-09	ACSL1,AGPAT2,AKR1B1,ANXA1,ARG2,ARL6IP5,ASPRV1,ASS1,BCL2A1,BIN1,BTG1,BTG2,C3,C3AR1,CAMP,Ccl9,CCNA2,CCNB2,CCR1,CD14,CDC37,CDK4,CDKN1A,CEBPD,CEBPE,CKAP4,COPS5,COX4I1,CSF3R,CTNNA1,CXCR4,CYCS,DGAT2,EDF1,EIF4E,FCGR1A,G0S2,GADD45A,GAPDH,GGH,GLRX,GSTP1,GTF3A,HP,HSD11B1,HSPA5,ICAM1,IL1RN,IL6R,ITGAL,ITGAM,JUN,JUNB,LCN2,LGALS1,LIN28A,LITAF,LTF,Ly6a (includes others),MMP8,MYC,NRP1,Orm1 (includes others),PCNA…	817 (26)
TRAP1	0.445	enzyme	Inhibited	-3.978	bias	3.63e-09	ATP5F1D,C1QBP,CHCHD3,COX5A,COX8A,GARS,HIBADH,HSD17B10,HSPD1,HSPE1,MAVS,MRPL18,SARS,SOD1,TIMM13,TXN2
26s Proteasome		complex		-1.355	bias	3.67e-09	ADRM1,BAX,CCNA2,CD68,CDK1,CDKN1A,CDKN1B,CTSA,CTSB,H2AFX,ICAM1,IFI35,JUNB,KIF23,LAMP1,MAD2L1,MAP1LC3B,MCOLN1,MYC,PSAP,PSMB3,PSMB5,PSMB6,PSMC2,PSMC4,PSMD2,PSMD6,RFC3,SQSTM1,TK1,TOP2A,TP53,TXNIP,UBE2I,VIM,WBP2,WIPI1	616 (21)
EIF4E	0.254	translation regulator	Activated	4.263	bias	3.71e-09	ATOX1,BIRC5,CAPG,Ccl2,CDK4,CDKN1A,CDT1,GPS1,GPS2,GPX3,HMOX2,INSIG1,LSM2,LSM4,LSM7,MYC,NEDD8,NHP2,NOP10,NRP1,PA2G4,PCNA,PHB,PHF5A,PLAUR,PNKP,PRDX5,PRPS1,PTGES3,RHOG,SIVA1,TP53,TXNL4B,UBE2A,UBE2C	282 (10)
HTT		transcription regulator		-0.103		4.06e-09	ACAT2,AP1S1,ATF3,ATP1A3,ATP5F1A,ATP5F1B,ATP5MC1,ATP5MF,ATP5PO,BCAP31,BCL6,BID,CANX,CBX1,Cd24a,CD74,CD9,CDKN1A,CLDN1,COX4I1,COX6A1,CYC1,CYCS,CYFIP2,ECI1,EEF1A1,EEF2,EGR1,EMP3,FAM173A,FDPS,FKBP4,FN1,GAPDH,GAS7,GLO1,Gm21596/Hmgb1,GPI,GPX3,GSN,HSP90AB1,HSPA5,HSPA8,HSPA9,HSPD1,HSPE1,IFI16,JUN,JUNB,JUP,LTF,MPEG1,Mt1,NDUFA1,NDUFA12,NDUFA3,NDUFA5,NDUFB2,NDUFB4,NDUFB8,NDUFS3,NDUFS7,NEDD8,NFE2L2,NR4A1,NSF,…	858 (20)
forskolin		chemical toxicant		-0.332	bias	9.35e-09	ARL6IP5,ATF3,ATP6V0B,ATP6V1A,ATP6V1B2,ATP6V1C1,BIRC5,BTG2,CALR,CAMP,Ccl9,CCNB1,CCNB2,CD14,CD44,CD55,CD68,CD9,CDC42SE1,CDK4,CDKN1A,CDKN1B,CDKN3,CEBPD,CEBPE,CNP,CRISPLD2,CTSV,CXCR4,CYFIP2,DHRS3,DUSP1,EBI3,ECM1,EGR1,EIF5A,ESD,FAS,FN1,FRRS1,GADD45A,GRN,GSTP1,H3F3A/H3F3B,HLA-DQA1,HLA-DQB1,HP,HSD11B1,HSPA1A/HSPA1B,ICAM1,IER2,Ifi202b,IL1B,INHBA,ITGA1,JUN,JUNB,LAMP1,LITAF,LTF,MAP1LC3B,MAT2A,MIF,MMP9,Mt1,…	629 (22)
cyclosporin A		biologic drug		0.526		1.01e-08	ADORA2B,AKR1B1,ANXA1,Arf2,ARHGEF1,ATF3,BATF,BAX,CAMP,CD14,CD40,CD44,CD55,CD68,CDK4,CDKN1A,CDKN1B,CX3CR1,CXCR4,CYP27A1,EDNRA,EGR1,EIF4A3,EIF6,EMP3,F5,FAS,FCGR2A,FN1,H2AFX,HSP90AA1,HSPA5,HSPD1,HTATSF1,ICAM1,IFNGR1,IL16,IL1B,ITGAL,ITGB7,JUN,LCN2,LGALS3,LXN,MCM3,MIF,MMP9,Ms4a6b,MTHFS,MYC,NDUFB6,NME1,NR4A1,PA2G4,PCNA,PDCD4,PREP,PSMB10,PSMB8,PSMC1,RBM3,RPS17,S100A10,S100A9,SNRNP70,SOD1,SSR4,TFEC,TP53,T…	743 (21)
IRF4		transcription regulator		-0.742		1.13e-08	BCL6,CANX,Ccl2,CCNB1,CD68,CDK1,CLTA,CTSS,CX3CR1,CXCR4,DBI,DNASE2,FAIM,HSPA8,IL17RA,IL18RAP,IL1B,IL1RN,IRF5,ITGAL,MANF,MYC,OAS1,PCNA,PHF11,PLAUR,PLSCR1,PPIB,PSMA1,PSMA2,RPL6,SUB1,TK1,TNFSF13B,TSPAN31,XBP1,YWHAH	509 (15)
RAF1	-0.645	kinase		1.451	bias	1.13e-08	ACAT2,ACOT7,ANXA1,BCL6,BTG1,CD37,CD44,CD74,CDKN1A,CDKN1B,CLDN1,CTSH,DHRS3,EGR1,EMP1,EMP3,FAS,GRN,HDC,HNRNPA2B1,IER2,IGBP1,IL1B,ITGAM,JUN,MGLL,MMP9,MXD1,MYC,NOP56,PLAUR,PNP,RAN,RND3,RPS2,SELENBP1,SNRPD1,SQLE,TCOF1,TOMM40,Tpm1,TUBB2A,TUBG1,TXNIP,YPEL5	671 (17)
IL10		cytokine		-1.678		1.15e-08	ARG2,BAX,BCL2A1,CAMP,CASP8,Ccl2,Ccl6,CCR1,CCR2,CD14,Cd24a,CD40,CD44,CD55,CD68,CDKN1A,CDKN1B,CDKN2D,CEACAM1,CTSB,CTSS,CTSZ,CX3CR1,CXCR4,DUSP1,FAS,FCGR1A,FCGR2A,FCGR3A/FCGR3B,FPR1,HLA-G,ICAM1,IL17RA,IL1B,IL1R2,IL1RN,ITGAL,ITGAM,ITGB7,JUN,LGALS1,LTB,LY75,MMP8,MMP9,MSR1,NEDD9,NT5E,OSM,PHGDH,PSMB9,S100A8,SCARB1,SLC9A3R2,SNAP23,STAT3,TINAGL1,TNFRSF13B,TNFRSF1A,TNFSF13B,TREM1,TSC22D3,TUBB4B,VCAM1,VCAN	553 (17)
SMARCB1	0.384	transcription regulator		-1.418	bias	1.2e-08	ACAT1,ACSL1,AURKA,BTG1,CCNA2,CD44,CDK1,CDKN1A,CDT1,CEACAM1,CENPA,CXCR4,EIF4E,F10,FAS,FCGR1A,FCGR2A,GADD45A,GMNN,GSN,HP,IFI16,IFNAR2,JUP,KIF23,MCM2,MCM3,MCM5,MYC,OAS1,OAS3,PGLYRP1,PLXNB2,RAB5B,RFC5,RND3,S100A1,SMARCB1,TP53	776 (24)
PCGEM1		other	Activated	2.369	bias	1.28e-08	CS,ENO1,FH,GAPDH,GLUD1,GPI,IDH1,IDH2,NUDT9,OGDH,PDHB,PGD,PGK1,PGLS,SDHA,SUCLG1,TALDO1	567 (7)
MYBL2		transcription regulator	Activated	2.964	bias	1.43e-08	AURKA,BIRC5,CASP6,CCNA2,CCNB1,CCNB2,CDK1,CLTA,COPA,HSPA8,IQGAP1,MYC,PLK1,SLC1A5,SLC25A3,TFEC,TOP2A,UBE2C	406 (10)
vincristine		chemical drug		-0.405		1.43e-08	BUB1B,CDKN1A,CDKN1B,EGR1,FAS,H2AFX,HNRNPF,HNRNPK,HSP90AB1,IL1B,JUN,LCP1,LMNB1,NCAM1,TP53,TUBB2A,YWHAE,YWHAQ	772 (20)
PML		transcription regulator		-1.718		1.52e-08	ACADL,ACTG1,AKR1A1,ANXA4,BAX,BIRC5,CACYBP,CAT,CDKN1A,CEBPE,CFL1,DNAJC9,FAS,FTL,GADD45A,HADHB,HLA-DMB,IL1B,JUP,MCM6,NFE2L2,NSFL1C,PRDX1,PSMB8,PSMB9,SQSTM1,STIP1,STMN1,SUMO2,TP53,TXN2,UCP2,VIM	708 (23)
FLT1		kinase		1.54		1.59e-08	AHCY,APLP2,BCL7B,BIRC5,CANX,CAPN2,Ccl2,CDKN1A,EIF2S3,EIF4B,EIF5A,G3BP1,G3BP2,GDI2,ICAM1,LAMP1,MAT2A,MAX,PTBP1,SDHC,SNAP23,THBS1,UBE2B,VDAC1	404 (16)
NFE2L1		transcription regulator	Activated	3.341	bias	1.66e-08	GSTP1,PSMA1,PSMA6,PSMA7,PSMB1,PSMB2,PSMB5,PSMB6,PSMB7,PSMC2,PSMC3,PSMD1,PSMD11,PSMD12,PSMD14,XPC
E. coli B4 lipopolysaccharide		chemical toxicant		-0.822	bias	1.9e-08	ANXA1,ANXA11,BAX,BID,CASP6,CASP8,Ccl2,CD40,CENPA,CLDN1,CLEC5A,CYP27A1,EMB,EVI2B,F13A1,F5,FAS,FCGR1A,FGL2,FPR1,FPR2,HLA-A,ICAM1,IFI16,IFI35,IFITM3,Ifitm6,IL1B,IL1RN,LCN2,LCP1,LRRFIP1,Ly6a (includes others),Mx1,NCF1,Ngp,PLAUR,PLEK,PROS1,PSMB8,PYCARD,RPL7,RPS25,SCARB1,SEH1L,Slfn2,Stfa2/Stfa2l1,TNFRSF1A,TP53,TRADD,TSPO,TXNIP,UHRF1,VCAM1	498 (15)
BMS-690514		chemical drug	Inhibited	-3.357	bias	2.03e-08	CCNB1,CDK1,CDKN1B,CTSH,CYCS,DNAJC9,HSP90AA1,HSPA4,HSPA8,HSPE1,MCM3,MCM5,MCM6,MCM7,PCNA	597 (11)
inosine		chemical - endogenous mammalian		1.874	bias	2.15e-08	AIF1,ANXA1,ANXA5,C3,CD63,CD68,CFB,EMP3,FTL,IFITM3,LCP1,LGALS3BP,Ms4a6b,Mt1,NPC2,SERPINB1,TSPO,TUBA1A,VIM
SRF		transcription regulator	Activated	2.012		2.76e-08	ACTG1,BATF,CAMP,CAP1,CAPRIN1,CD177,CDK4,CDKN1A,CEBPD,CEBPE,CLDN1,CLDN15,CNN2,CSRP2,CXCR4,DSTN,EGR1,EIF6,G0S2,GADD45A,GDA,GLRX3,GSN,HIPK1,IER2,ITGA1,ITGAM,JUN,JUNB,LCN2,LTF,MALAT1,MAPK13,MGST1,MGST2,MMP9,MOGAT2,MRPS35,MYH9,Ngp,NPM1,NR4A1,PDE2A,PDLIM7,PGLYRP1,PPIA,PRSS57,RAF1,RAMP1,RFC4,RND3,RNH1,S100A8,S100A9,SLPI,SND1,SNX2,TMEM40,Tpm1,TUBB4B,VCAN	507 (10)
ERN1		kinase	Activated	3.364	bias	2.78e-08	ARF4,ATF3,Ccl2,CEBPD,DGAT1,DGAT2,DNAJB11,FAS,HSP90B1,HSPA5,IL1B,JUN,LPCAT2,MAP1LC3B,MORF4L2,MVD,NARS,PADI4,PDRG1,PROS1,SDF2L1,SEC11A,SEC61A1,SLC35B1,SMARCB1,SPCS2,SSR3,SURF4,TBCB,TINAGL1,XBP1	467 (16)
STAT1		transcription regulator	Activated	2.6	bias	3.08e-08	BAX,BCL6,BIRC5,BTG1,C3,CASP6,CASP8,Ccl2,CCRL2,CD14,CD40,CDKN1A,CDKN1B,CEACAM1,CEBPD,CFB,CSF3R,CTSS,CX3CR1,DDX60,EGR1,FAS,FCGR1A,FGL2,HLA-DQA1,HLA-DRB5,HLA-E,ICAM1,IFI16,IFI30,IFI35,Ifi47,IFITM3,IL18BP,IL1B,IRF5,IRF8,JUN,Klrk1,LCN2,LY6E,MMP9,Mx1,MYC,OAS1,PSMB10,PSMB8,PSMB9,PSME1,PSME2,S100A10,SAMHD1,Slfn1,SLFN12L,Slfn2,SMARCB1,SOAT1,STAT3,TNFSF13B,TP53,TRAFD1,Wfdc17	524 (18)
CEBPE	-1.137	transcription regulator	Inhibited	-3.949		3.09e-08	CAMP,Ccl9,CD14,CDK4,CDKN1B,CLEC10A,CSF3R,CTSV,IL1RN,ITGAM,LCN2,LTF,MMP8,MMP9,MYC,NCF1,Ngp,Orm1 (includes others),Retnlg
ACOX1		enzyme		-1.313		3.52e-08	ACADL,ACSL1,Akr1c12/Akr1c13,CAT,CD63,CDKN1A,CSTB,CTSV,GADD45A,GSTP1,HAL,HLA-DQA1,HLA-DRB5,HSD11B1,HSPA5,LCN2,LGALS3,LGALS3BP,MGLL,NFE2L2,NUPR1,OAT,Orm1 (includes others),PLSCR1,RBM3,RPL12,Rpl36,RPS24,SELENBP1,SQSTM1,TAGLN2,TP53,UCP2,XBP1	315 (10)
NRAS		enzyme				3.68e-08	ANXA4,BAX,BUB3,CCNB1,CCNB2,CD48,CDC20,CDKN1A,CDKN3,CEACAM1,CENPA,CFH,CX3CR1,CYBB,EGR1,FN1,HLA-A,IFI16,Ifi202b,IFI35,IL1RN,KIF22,LCN2,LGALS1,LY86,MCM3,MSR1,NCAM1,NCF2,PLEKHO1,POLR2M,PRDX2,PSMB8,RBM38,RNASE6,SESN1,STAT3,TUBB2A,UBE2C,YIF1A,ZNF32	737 (20)
IRF1		transcription regulator		0.975	bias	3.85e-08	ADAM8,BAX,CASP8,CCNB1,CD40,CDK4,CDKN1A,CEACAM1,CFB,CTSS,CYBB,EIF4A3,FGL2,FPR2,HLA-G,IFI35,Ifi47,IFITM3,IL17RA,IL18BP,IL1B,IRF5,LTB,MMP9,MYC,OAS1,PCNA,PSMB10,PSMB8,PSMB9,PSME1,PSME2,SLPI,STAT3,TNFSF13B,TP53,TRADD,VCAM1	432 (15)
lith-O-Asp		chemical reagent		1.093		3.98e-08	CCT6A,CFL1,HNRNPA2B1,MMP9,OLA1,PGK1,PSMB1,PXN,RNH1,TRAP1
HSP90B1	1.159	other	Activated	2.357	bias	4.01e-08	CALR,CANX,CD40,EIF5A,HSP90B1,HSPA5,IL1B,ITGAL,ITGB2,PPIF,RPL12,RPL27A,RPL30,RPLP2,RPS14,RPS20,SNX3,SSR3,SSR4,XBP1	486 (15)
rosiglitazone		chemical drug		0.858		4.37e-08	ACAA2,ACADL,ACO2,ACSL1,ADAM8,ADIPOR1,ALOX5,ASAH1,BAX,C3,CAT,Ccl2,CCR2,CCRL2,CD68,CDKN1A,COX4I1,COX5A,CS,CYCS,DGAT1,DGAT2,DHRS3,EBI3,EDNRA,ETFA,ETFDH,FABP5,FN1,GAPDH,GPR65,HADH,HADHB,HP,HSD11B1,HSPA5,HSPA9,ICAM1,IDH3A,IDH3B,IL1B,IL1RN,INSIG1,ITGAL,ITGAM,LCN2,LRG1,LTB4R,MAT2A,MCM6,MCM7,MGLL,MMP9,MSR1,Ngp,OAS1,OAS3,PCNA,PEA15,PHYH,PTPRO,S100A8,S100A9,SAMHD1,SCARB1,SLC27A4,SOAT1,SOD1,THBS1,UCP2,YWHAE	575 (19)
poly rI:rC-RNA		biologic drug		0.317	bias	5.28e-08	ANXA1,ATF3,BAX,Bst2,C3,CAMP,Ccl2,CD14,CD40,CD44,CD74,CEACAM1,CEBPD,CFB,Clec2d (includes others),Clec4b2,CNP,CXCR4,CYP4F2,DUSP1,EBI3,EGR1,EIF2S3,FAS,FCGR1A,FN1,FPR1,GATM,HLA-A,HLA-E,HLA-G,ICAM1,IFI16,IFITM3,IFNGR1,IL1B,INHBA,IRF5,ITGAM,JUN,JUNB,Klrk1,LTA4H,LTB,LTF,LY6E,M6PR,MMP9,MSR1,MVP,Mx1,MYC,NKG7,NLRP3,NR4A1,OAS1,OAS3,PLAUR,PPP1R15A,PSMA3,PSMB8,PSMB9,PSME2,SCARB1,SLC40A1,SLFN12L,SLPI,THBS1,TNF…	506 (15)
Esrra		transcription regulator	Activated	3.941		5.41e-08	ACADL,ACAT1,ATP5F1B,ATP5MC1,ATP5MC3,ATP5MF,ATP5PB,ATP5PF,ATP5PO,COX5A,Cox5b,COX7A2L,Cox7c,COX8A,CYC1,CYCS,ENO1,GYS1,IDH3A,NDUFA2,NDUFA5,NDUFS3,PPA1,PYGL,RARA,SDHB,STARD3,UQCR11	266 (7)
TFRC		transporter		-0.765	bias	6.08e-08	ANKRD22,ATF3,CCNA2,CCNB1,CDC20,CDK1,CDKN1A,F13A1,FTL,GADD45A,GAS7,GPX3,HSPA5,ITGAM,ITGB2,JUN,LY75,MS4A6A,PHGDH,PLD4,PPP1R15A,SULF2,TP53,XBP1	326 (14)
CD38		enzyme	Activated	3.498	bias	6.29e-08	ANXA6,APH1A,ASS1,BCL6,CD44,CHST12,CISD1,CKAP4,CRELD2,CRIP1,FAM162A,FGL2,FN1,ICAM1,IFI30,IL1R2,IL6R,ITGB7,LGALS3,MANF,NCAM1,NT5E,PDIA6,PDLIM1,PRDX4,PSAT1,RPN1,S100A4,SDF2L1,SLC16A3,SPCS2,TMEM97,TPI1,VCAM1,VIM,XBP1	450 (14)
TGM2		enzyme	Inhibited	-2.949		6.31e-08	ATP1B3,BCL2A1,BCL6,BTG2,C3,C5AR1,CCRL2,CD101,CD74,CEACAM1,CFP,CX3CR1,DDX60,FARSB,FFAR2,FN1,GCA,GM2A,HDAC3,HK3,IFI35,IL1B,ITGAM,LY6E,MAFB,MMP8,MMP9,MYC,NCF2,NPC2,OAS1,OAS3,OLFM4,PADI4,PLSCR1,RARA,RPF2,S100A8,SAMHD1,SIRPA,SLPI,THBS1,TIMM8A,TP53,WDR3	601 (15)
PPARG		ligand-dependent nuclear receptor		1.591		6.61e-08	ACAA2,ACADL,ACSL1,ADRB2,AGPAT2,ALDH9A1,APH1A,ATP5PO,BAX,BCL6,BIN1,BIRC5,C3,CAT,Ccl2,CCPG1,CD40,CDKN1A,CS,CYCS,DGAT1,DGAT2,DHRS3,FABP5,FDPS,FN1,GABARAPL2,GAPDH,HADHA,HADHB,HEBP1,HP,HSD3B7,ICAM1,IDH1,IL1B,IL36G,INSIG1,JUN,MBNL1,MCM7,MCTP1,MDH1,MGLL,MGST1,MMP9,MRTO4,MVD,NCF1,NDUFA5,NFE2L2,NR4A1,NSF,PCNA,PDHB,PEA15,PEPD,PID1,PYGL,RPSA,S100a11,S100A8,SCARB1,SHISA5,Slc25a1,SLC27A4,SNX1,SOD1,TKT,TP53,TS…	557 (19)
MED30		transcription regulator				6.65e-08	Cox5b,CS,NDUFA10,NDUFB3,NDUFS2,NDUFS7,NDUFV1,SDHA,SDHB,SDHC,SDHD
4-phenylbutyric acid		chemical - endogenous mammalian		0.352		7.82e-08	ABCD1,BCKDHA,CALR,CAMP,CASP8,CDKN1A,CDV3,CNP,EIF2S2,ELP2,GSN,GUSB,HLA-A,HSP90B1,HSPA4,HSPA5,MXD1,PARK7,PCNP,PSMA3,PSMC3,STK10,XBP1,YPEL5	380 (8)
STAT3	-0.253	transcription regulator		0.477	bias	7.83e-08	APEX1,ARG2,BATF,BCL6,BIRC5,C5AR1,CAT,Ccl2,CCNB1,CCR1,CCRL2,CD40,CD74,CD9,CDK1,CDKN1A,CDKN1B,CDKN2D,CEACAM1,CEBPD,CFB,CLN6,COPS5,CTSB,CXCR2,CXCR4,EGR1,FAS,FCGR1A,FFAR2,FGL2,FN1,GADD45A,GPR65,HIST2H2AA3/HIST2H2AA4,HLA-A,HLA-DMA,HLA-DQA1,HLA-DRB5,HP,ICAM1,IFI16,Ifi202b,IFI30,IFI35,IFITM3,IL1B,IL1RN,IL6R,IRF5,ITGAM,ITGB2,JUNB,Klrk1,LTF,MAFB,MMP9,Mt1,Mx1,MYC,NFKBIZ,NPM1,NRP1,OAS1,OAS3,PDIA4,PGK1,PHB,P…	478 (19)
progesterone		chemical - endogenous mammalian		0.408		8.35e-08	ACAT1,ACOT7,ACSL1,ADH5,ADRB2,ATF3,ATP6V1B2,AURKA,BAX,BCL6,BSG,C3,C5AR1,CCNA2,CCNB1,CCNB2,CCR2,CD40,CD82,CDKN1A,CDKN1B,CDT1,CEBPD,CFB,CNDP2,COMT,CRCP,CSF3R,CTSV,CXCR4,EDNRA,EGR1,FEN1,FKBP3,FKBP4,FN1,GARS,GRINA,HDC,HLA-DQB1,HLA-G,HOPX,HSD11B1,HSD17B4,HSPA8,ICAM1,IDH2,IL6R,INHBA,ITGA1,JUN,KLF10,LCN2,LEPROT,LGALS1,LGALS3,LITAF,LTF,LXN,MAD2L1,MCM2,MCM3,MCM5,MCM6,MCM7,MMP9,MYC,NCAM1,NCAPH,NEDD9,NME2,NR…	622 (21)
WT1		transcription regulator		-0.518		8.81e-08	AHCY,ANXA11,APLP2,APRT,ARL2,BCL2A1,BTG2,CAPRIN1,CDKN1A,CLIC1,CMPK1,CTSV,EGR1,ETFA,EXT2,FDPS,GSN,HSP90B1,IL1B,IRF8,ITGAM,JUNB,JUP,LGALS3,LMAN1,MGST1,MMP9,MYC,NME1,NUCB1,PDIA4,PLAUR,PPIB,Ptma (includes others),RARA,RPL19,SEC13,SLC2A3,SQLE,SQSTM1,SRSF6,TARS,TCOF1,THBS1,TRAP1,WDR74	757 (22)
MAPK1		kinase		-1.302		8.97e-08	ARG2,ATF3,AURKA,BIRC5,CAPN2,CCNB1,CDKN1A,CDKN1B,CFB,CRYL1,CTSB,DDT,DUSP1,EGR1,EMP1,ERCC1,ERP29,FN1,GMNN,H2AFV,HDC,HLA-DMA,HLA-E,IFI16,IFI35,IFITM3,IL1B,IL1RN,JUN,JUNB,LGALS1,LGALS3,LGALS3BP,LMNA,MAPK13,MMP9,MVP,MYC,NFE2L2,NKG7,NR4A1,NRP1,NT5E,NUPR1,OAS1,OAS3,OGFR,OSM,PHF11,PLSCR1,PLXDC1,PROS1,PSMB8,PSMB9,PSME2,SAMHD1,SUN2,TP53,UBE2C,UBE2I,VIM	741 (18)
ESR1		ligand-dependent nuclear receptor		1.274		9.03e-08	ACSL1,AHNAK,ALOX5,ANAPC5,ANXA3,ANXA4,AP1G2,AP1S1,AP2S1,APEX1,ARPC5L,ASS1,ATF3,ATG3,ATP6V1A,AURKA,BAX,BCCIP,BCL6,BIN1,BIRC5,BUB1B,BUB3,C3,CAMK1,CAPN2,CASP6,CCNA2,CCNB1,CCPG1,CD55,CDC42SE1,CDCA8,CDK1,CDK4,CDKN1A,CDKN1B,CDKN3,CEBPD,CENPA,CENPM,CLDN1,Clec2d (includes others),COMT,COPA,COPE,COPG1,COPZ1,CSNK1A1,CTSB,CTSC,CTSS,CYFIP2,EGR1,EIF5A,ENO1,FAS,FKBP4,GAS7,GLRX,GM2A,GPSM2,GSN,HEBP1,HLA-E,HLA-G,H…	867 (21)
HSF1		transcription regulator		0.101		9.74e-08	BAX,BUB1B,CBX3,CCNA2,CCT2,CCT3,CCT4,CCT5,CCT6A,CCT7,CCT8,CDK1,CKS1B,CSRP2,FKBP4,FXR1,HSP90AA1,HSP90AB1,HSPA1A/HSPA1B,HSPA4,HSPA8,HSPD1,HSPE1,ICAM1,IL1B,JUN,LSM2,MAT2A,MBOAT7,MRPL18,PGK1,RANGAP1,RPL22,SPR,ST13,STIP1,TCP1,TRA2B,VCAM1	740 (19)
methylselenic acid		chemical reagent				9.75e-08	ATF3,AURKA,BCL2A1,BIRC5,BUB1B,CCNA2,CCNB1,CCNB2,CD44,CDC20,CDK1,CDK2AP2,CDK4,CDKN1A,CDKN2D,CENPA,DPYSL2,ENPP5,ERCC1,FN1,G3BP2,GADD45A,H1F0,HSP90B1,JUN,JUNB,MANF,MCM2,MCM3,MCM5,MCM6,MCM7,MXD1,MYC,PCNA,PDIA4,PLK1,PPP5C,RABAC1,RFC5,RGS10,RND3,RRM1,STX7,TAF6,TOP2A,TUBB4B,UBE2B	787 (22)
4-nitroquinoline-1-oxide		chemical toxicant		1.1	bias	9.8e-08	AURKA,AURKB,CCNA2,CCNB1,CCNB2,CDK1,CDKN1A,EGR1,MMP9,TP53	472 (7)
ADRB		group		-0.524		9.97e-08	ACAT2,ANXA5,ATF3,BAX,CASP6,Ccl2,CCNA2,CD40,CD68,CDK4,CDKN1A,CDKN1B,FAS,FDPS,GADD45A,HSD3B7,HSPD1,ICAM1,IDH1,INSIG1,JUN,JUNB,MMP9,MVD,NPM3,NR4A1,PCNA,PCYT2,RAN,SLC40A1,SLC9A3R2,SQSTM1,SRM	645 (17)
CLDN7		other		0.626		1.02e-07	ANXA3,APLP2,ARHGDIB,ATP5MC1,C3,CD68,CKAP4,DPM3,F5,GRINA,HIST2H2AA3/HIST2H2AA4,LAMTOR1,LGALS3,LTA4H,MCU,MMP9,MRPL36,MRPL40,MRPS15,MRPS17,NUDT21,PHGDH,PLGRKT,PSMG2,RPS7,RSL1D1,SERPINB1,SLC35B1,TINAGL1,WIPI1
UCP1		transporter		1.458		1.03e-07	BCAT2,BCKDHA,BTF3,Cd24a,CD68,CDKN2AIPNL,CPNE2,CTSV,EEF1A1,EMB,GADD45A,GARS,GHITM,GPX3,GSTO1,Hmgn2 (includes others),IL1B,MYC,NDUFA10,NDUFB8,NDUFS3,NT5C,NUPR1,OAS3,PGD,PGLS,PHGDH,PSAT1,SDHB,SHMT2,SND1,SRM,TXN2,UCP2,UQCRC1,UQCRC2
peoniflorin		chemical drug		0.091		1.36e-07	ATP5F1A,CLTA,COX5A,ENO1,GLO1,HIBADH,PDIA3,PPIF,PSMB7,SAR1B,TUBB
ELAVL1		other		1.58	bias	1.38e-07	ANXA11,ARG2,ATF3,CDKN1A,CENPA,DGAT1,DUSP1,EIF4E2,MYC,NDUFB8,PRC1,PROM1,PSMB4,RFC5,RPL13,RPN2,RPS14,RPS6,SLC7A7,SRSF7,STAT3,TAF9,TIMM17A,TOP2A,TP53,TRIOBP,TSC22D3	690 (22)
JUN	0.697	transcription regulator		0.569	bias	1.46e-07	ACAT2,ANXA1,APEX1,ATF3,BAX,BCL2A1,BTG1,C3AR1,CAMP,CAPN2,Ccl2,CCNA2,CD14,CD44,CD68,CDC20,CDK1,CDKN1A,CDKN1B,COMT,CYCS,DUSP1,EEF2,EHD4,EIF4A1,ERCC1,FAS,FN1,GADD45A,GSTP1,HLA-G,HNRNPA2B1,ICAM1,IFI16,IL1B,ITGAM,JUN,JUNB,LGALS3,LMNA,MAT2A,MMP8,MMP9,MSR1,MVD,MYC,NCAM1,NCF2,NFKBIZ,NR4A1,OSM,PADI4,PDCD4,PEA15,PLAUR,PRDX1,PTPRO,RARA,S100A10,SF3B3,SNRNP70,SNRPB2,Snrpg,STMN1,SULF2,TARBP2,THBS1,TK1,Tmsb4x (i…	762 (20)
IRF8	1.112	transcription regulator		-0.392	bias	1.64e-07	ASAH1,ATF3,BAX,BCL6,Ccl9,CCR2,CD14,CD37,CD40,CD74,CDKN1A,CEBPE,CFB,CSF3R,CTSS,CYBB,EGR1,FAS,ICAM1,IL17RA,IL1B,IRF5,IRF8,ITGAM,MAFB,MMP9,MSR1,MYC,OAS1,TK1,TNFSF13B,TP53	479 (15)
nitric oxide		chemical - endogenous mammalian		-0.109		1.69e-07	ATF3,BAX,BIRC5,CD44,CDKN1A,CDKN1B,CTSH,DUSP1,ECE1,EGR1,FAS,GADD45A,GSTP1,HPRT1,HSP90AA1,HSP90AB1,IL1B,JUN,JUNB,MGST1,MMP9,Mt1,MYC,NCAM1,NFE2L2,PDIA4,PRDX5,SOD1,SQSTM1,THBS1,TK1,TNFSF13,TNFSF13B,TP53,UBE2C	833 (21)
AREG		growth factor	Activated	2.736		2.06e-07	AURKB,BIRC5,BSG,C3,CCNA2,CCNB1,CCNB2,CDC20,CDCA8,CENPA,CXCR4,EGR1,HIST1H2AC,HIST1H2BC,HIST2H2AA3/HIST2H2AA4,JUN,KIF20A,MMP9,PLK1,PRC1,SAE1,SSBP1,SSRP1,TOP2A	785 (23)
OGA		enzyme		-1.355		2.36e-07	ACO2,ACTG1,ADRM1,APOBEC1,ASS1,ATP5MG,BAX,C3AR1,CAPN1,Ccl2,Ccl6,Ccl9,CCR1,CD14,Cd24a,CD302,CD40,CD44,CD48,CD55,CD68,CDCA4,CDKN1A,CEACAM1,CLDN1,CX3CR1,CYFIP2,EIF2A,FAS,FDPS,FN1,GAA,GADD45A,GSN,GTF3A,HK3,HSD3B7,HSP90AB1,IDH3A,IGBP1,IL6R,ITGB7,JUN,LPXN,MGLL,NDUFA13,NDUFA2,NDUFA4,NDUFA5,NDUFA6,NDUFA9,NDUFB11,NDUFB9,NDUFC2,OGDH,PLD4,PRDX4,PROM1,PYGL,RAB27A,SLFN12L,TCF19,TGFBI,THBS1,TP53,TRADD,TUBA1A,VIM	738 (21)
cisplatin		chemical drug		1.713		2.36e-07	ADAP2,ADRM1,ANXA1,ANXA4,ANXA5,ASCC1,ATF3,BAX,BCL2A1,BIRC5,BTG2,CAPN1,CAPN2,CASP6,CASP8,CAT,Ccl2,CCNB1,CCR1,CD14,CD44,CDK1,CDKN1A,CDKN1B,CTSB,DHRS3,DUSP1,ECE1,EGR1,EMP3,ERCC1,FAS,FCGR2A,FN1,G0S2,GADD45A,GOT2,GSTP1,H2AFX,HADHA,HSPA5,ICAM1,IDH2,IL1B,ISYNA1,JUN,LCN2,LGALS3,LIPA,LMNA,LMO4,LXN,MAP1LC3B,MCM3,Ms4a6b,Mt1,MYC,NCAM1,NCF1,NCF2,OAT,PARP1,PEBP1,PHGDH,PLK1,PLXNB2,PPIA,PSMA1,PSMB10,PSMB8,PSMD4,P…	775 (22)
Ige		complex		1.994	bias	2.4e-07	ADAM8,ALOX5,ANXA1,BCL2A1,BCL6,BIRC5,C3,CAPN2,CARHSP1,Ccl2,Ccl9,Cd33,CD40,CD74,CDKN1A,CEACAM1,CLEC4E,CYCS,DUSP3,EBI3,EGR1,ENOPH1,FAS,FCGR1A,FFAR2,FGD2,GSN,HDC,HLA-DMA,HSD17B12,HSPA9,HSPD1,ICAM1,IL1B,JUNB,MGST2,MIF,MYC,NRP1,OSM,PEA15,PFN1,PILRA,PPIF,PRDX1,SCARB1,SERPINB1,SNRPD1,SNRPD3,SNX1,SRM,TNFRSF13B,Tpm1,TPST2,TUBB6,VCAM1,VIM	707 (17)
mifepristone		chemical drug		-0.965		2.45e-07	ANXA1,ATF3,BAX,C3,CASP8,Ccl2,CCR2,CD14,Cd24a,CD74,CDKN1A,CDKN1B,CEACAM1,CEBPD,CTNNA1,CYBB,DUSP1,EGR1,FAS,HDC,HLA-DQB1,HSD11B1,HSPA4,HSPA5,ICAM1,IL1B,ITGAM,JUN,JUNB,LTF,Ly6a (includes others),MAD2L1,MAP4K1,MMP9,Mt1,MYC,NFE2L2,NME2,NPM3,NR4A1,P2RX7,PCNA,PEPD,PGLYRP1,PSMA1,RARA,SRM,SUMO1,TK1,TP53,VCAN,XBP1	668 (17)
SB203580		chemical - kinase inhibitor		0.5	bias	2.81e-07	ADRB2,ANXA1,ANXA3,ARHGDIB,ATF3,ATP5MF,BAX,BIRC5,C3,C3AR1,CAMP,Ccl2,CCNB1,CCRL2,Cd24a,CD40,CD55,CDK1,CDKN1A,CDKN1B,CEACAM1,CEBPD,CTSH,CX3CR1,DUSP1,EBI3,EGR1,ENO1,ERP29,FAS,FN1,FPR2,GADD45A,GDI2,GLRX,GPI,GSTP1,HSPA5,ICAM1,IFI35,IL1B,IL1RN,IL36G,ITGAM,JUN,JUNB,MAT2A,MMP8,MMP9,MXD1,MYC,NR4A1,OPTN,PLAUR,PPP1R15A,PRDX1,PSMB4,RBM3,S100A10,SGMS2,SLPI,SNAP23,STK17B,THBS1,TMEM173,TP53,TRADD,TREM1,UCP2,VCAM…	717 (18)
Cdc42		enzyme		1.941		3.01e-07	ATP6V1A,BID,CAPZA1,Ccl2,CTSA,CTSB,CTSH,CTSS,CTSV,CTSZ,FAS,LAMP1,MYH9,NPC2,STMN1	320 (11)
discodermolide		chemical drug				3.01e-07	CCNB1,CCNB2,CDC20,CDK1,CDKN1A,GADD45A,KIF23,PLK1,PRC1,PTTG1,RFC3,RFC4,RFC5,TOP2A,TP53	531 (13)
Ptprd		phosphatase		-1.667	bias	3.14e-07	BIRC5,Ccl2,Ccl6,CDK1,CDKN1A,CEBPD,IFI35,MYC,PSMB9	268 (7)
FN1	1.423	enzyme		1.084	bias	3.18e-07	AHCY,APLP2,BCL7B,BIRC5,CANX,CAPN2,CCT4,CDK4,CDKN1A,CDKN1B,COPS5,EIF2S3,EIF4B,EIF5A,FN1,G3BP1,G3BP2,GDI2,GPX1,IL1B,ITGA1,ITGAM,LAMP1,MAT2A,MAX,MMP9,MYC,PCNA,PLAUR,PSMC1,PTBP1,PXN,SDHC,SEC23B,SNAP23,SQSTM1,THBS1,TOR1A,UBE2B,VDAC1,VIM	739 (22)
ADORA2A		G-protein coupled receptor		1.364		3.22e-07	ATP1A3,Atp5e,ATP6V1B2,Ccl2,CCT5,Cd24a,CD81,DGAT2,DSTN,DUSP1,EEF2,EIF2S2,EIF5A,FBL,G3BP2,GAPDH,GDI1,GPI,HNRNPK,IFITM3,MMP9,NR4A1,P4HB,PEA15,PGAM1,PPP1CA,RAB6A,SSRP1,TSC22D3,TUBB2A,USP5	430 (17)
KDM5B		transcription regulator	Inhibited	-2.751	bias	3.22e-07	ARL6IP5,AURKA,BUB1B,BUB3,CCNB1,CDCA3,CDK1,CDKN1B,CLDN1,EGR1,FABP5,GADD45A,GCA,INSIG1,IVNS1ABP,LGALS3BP,LRCH4,MCM2,MCM3,NCAPH,NDE1,NEDD9,POLB,PRPS1,SNRPD1,SPTSSA,SS18,TNFSF13,TOP2A,TUBB2A,XBP1	675 (16)
palmitic acid		chemical - endogenous mammalian		-0.406		3.38e-07	ACADL,ACSL1,ATF3,ATP5MF,BAX,Ccl2,CD68,CDKN1A,CS,CTSB,CYBB,CYP4F2,DGAT2,EEF1A1,FDPS,GAPDH,HSPA5,ICAM1,IDH2,IL1B,IL1RN,IL6R,INHBA,LCN2,MAFB,MAP1LC3B,Mt1,MVD,NCF1,NCF2,NDUFA5,NFE2L2,NR4A1,Orm1 (includes others),SCARB1,SLC25A4,SQSTM1,TP53,TXNIP,UCP2,VCAM1,XBP1	767 (23)
6-hydroxydopamine		chemical toxicant	Activated	2.914	bias	3.39e-07	BAX,C3,CALR,CEACAM1,CEBPE,HSP90AB1,HSPA1A/HSPA1B,HSPA4,HSPA5,HSPA8,HSPA9,HSPBP1,IL1B,JUN,MMP9,NCAM1,P4HB,PDIA3,PPIB,PSMB2,PSMC4,TP53,VCP	450 (16)
IGF1		growth factor		0.621	bias	3.56e-07	ADORA2B,AKR1B1,BAX,BCL2A1,BIRC5,BSG,BTG2,CAMP,Ccl2,CCNA2,CCNB1,CD44,CDK1,CDK4,CDKN1A,CDKN1B,CEBPD,CNP,CYBB,CYFIP2,DUSP1,EGR1,EIF1AX,EIF4B,EIF4E,FN1,GADD45A,GAPDH,Gm21596/Hmgb1,H2AFX,HDC,HSD11B1,HSPA4,HSPA5,ICAM1,IER2,IFITM3,IL16,IL1B,JUN,JUNB,LAMP1,LASP1,LCN2,Ly6a (includes others),MAFG,MIF,MYC,NCAM1,NCF2,NFE2L2,NR4A1,NUPR1,PARP1,PCNA,PDXK,PLAUR,POLD4,PSMB8,PSMB9,SLPI,SQLE,SRM,SRSF3,TGFBI,THBS1,T…	705 (18)
CEBPB		transcription regulator		-0.117	bias	3.85e-07	BCL2A1,C3,Ccl2,CCNA2,CCNB2,CD14,CDKN1A,CDKN1B,CDT1,CEBPD,CHIT1,CLEC4E,CLPP,COPS5,CSF3R,CTSC,CXCR4,DGAT2,DYNLT1,FAS,FTL,GADD45A,HDC,HIST1H4A,HLA-A,HP,HSD11B1,HSD17B4,HSP90AA1,HSPA8,HSPD1,HSPE1,ICAM1,IDH3B,IFITM3,IL18BP,IL1B,IL1RN,ITGAL,JUN,LCN2,MCM3,MSR1,MYC,NFKBIZ,NRP1,NUPR1,Orm1 (includes others),PCNA,PEA15,PLAUR,PPP1R15A,PSMA3,PSMA6,RAC2,RBBP7,SCARB1,SEC11A,STAT3,TMEM176A,TMEM176B,TNFRSF1A,TP53…	603 (17)
MRTFB		transcription regulator	Activated	2.982	bias	4.28e-07	CAMP,CD177,CEBPE,CLDN15,CNN2,CXCR4,G0S2,HLA-A,LCN2,LTF,MAPK13,MGST2,MOGAT2,MYH9,Ngp,PGLYRP1,PRSS57,RAMP1,S100A8,S100A9,SCARB1,SERINC3,SLPI
GPX1	0.46	enzyme		0.542	bias	4.31e-07	CAT,Ccl2,CD14,CYBB,FAS,GLRX,GPX3,ICAM1,MMP9,NDUFB8,SOD1,TNFRSF1A,TRADD,TXN2,UQCRC2,VCAM1	682 (19)
CHUK		kinase		0.534	bias	4.73e-07	ARL6IP5,ATF3,C3,Ccl2,Ccl9,CCNB1,CCR1,CDKN1A,CDKN1B,CEBPD,CTSB,CTSZ,FAS,GM2A,GRN,HLA-A,HSP90AA1,ICAM1,IFI16,IFI35,IL1B,IL1RN,JUNB,KLF10,LCN2,MAT2A,MMP9,Mt1,MXD1,MYC,NUMB,PCNA,PLK1,PLSCR1,Slfn2,SQSTM1,TK1,TMEM176B,TNFSF13B,TP53,VCAM1	675 (18)
MAP4K4		kinase	Inhibited	-3.657	bias	4.95e-07	ACAA2,ACO2,ALDH3B1,BCAT2,Calm1 (includes others),CYC1,DHRS4,EIF4E2,GYS1,HADH,HADHA,HADHB,HSD3B7,MAFB,MGLL,NDUFA3,NDUFA5,NDUFAB1,NDUFS8,NDUFV1,OGDH,PAPSS2,PGAM1,PHYH,PON2,SUCLG1,UQCRC1,UQCRFS1
CD40LG		cytokine		1.671	bias	5.71e-07	ALG3,ANXA6,ANXA7,APRT,ATF3,BATF,BAX,BCAT2,BCL2A1,BCL6,BTG1,CBX3,CCR1,CCR2,CD40,CD44,CD63,CDKN1A,CDKN1B,CFP,CTSC,CXCR4,DUSP1,EBI3,EGR1,EIF2A,EIF2S1,FAS,FBL,G0S2,GADD45A,GPR183,HLA-DQA1,HLA-DQB1,HSP90AA1,HSPA1A/HSPA1B,ICAM1,IL1B,INHBA,ITGAM,ITGB7,JUN,JUNB,KDM6B,LMAN2,LTB,MIF,MYC,NAP1L1,PLAUR,PLEK,PSMA2,PSMB10,PSMB8,PSMB9,PSME1,PSME2,STAT3,TNFRSF13B,TP53,TRADD,TREM2,TUBB,VCAM1	516 (15)
MYD88		other		-1.787	bias	5.84e-07	ACSL1,BATF,C3,Ccl2,CCRL2,CD14,CD40,CD44,CEBPD,CLEC10A,DUSP1,Ear2 (includes others),EBI3,EGR1,FPR1,FPR2,HCK,HDC,HLA-A,HP,HSP90AB1,HSPA5,ICAM1,IL1B,IL1RN,INHBA,IRF8,ITGB7,JUN,MCM2,MMP8,MMP9,Ms4a4b (includes others),MSR1,MYC,NFKBIZ,PARP1,PARP2,PILRA,S100A8,SAMHD1,SCARB1,SLC16A3,TFEC,TNFRSF13B,TNFSF13B,Tnfsf9,VCAM1	489 (14)
methotrexate		chemical drug		1.057		6.26e-07	ABCD1,ACAA2,ACTG1,ADIPOR1,ANXA4,APEX1,ASS1,BTG2,C3,CDKN1A,CFB,CFH,CTSS,CTSV,CXCR2,CYCS,DGAT1,DGAT2,DUSP1,ECHS1,FAS,FKBP3,FPR1,FPR2,GAPDH,GPI,GSN,HADHA,HADHB,HSD11B1,HSD17B4,ICAM1,IL1B,ITGA1,Mt1,MYC,OSTF1,PHYH,PPIA,PRDX1,SLC31A2,SOD1,THBS1,TP53,VCAM1	538 (16)
desmopressin		biologic drug		-1.234	bias	6.26e-07	AHNAK,AKR1B1,CAPG,EIF4B,ENO1,GAPDH,H3F3A/H3F3B,HINT1,HSPA1A/HSPA1B,HSPA8,LMNA,PPIA,PPP2R5D,PXN,RPL23,RPS3,SEC61B,SNX3,STX7,TUBB,VDAC1,YWHAB,YWHAH,YWHAQ
NQO1		enzyme	Activated	2.706		6.38e-07	BAX,BIRC5,C5AR1,Ccl6,Ccl9,CCR1,CCR2,CDKN1A,CSF3R,CXCR4,FPR1,MMP9,TP53,VCAM1	594 (18)
OSM	-1.071	cytokine	Inhibited	-2.606		6.57e-07	ADH5,ANXA1,ANXA3,ASAH1,BLMH,CAT,CBX3,Ccl2,CDKN1A,CDKN1B,CEBPD,CLPP,COX6B1,COX7B,CTSH,CTSV,DHRS3,DHRS7,ECM1,EMP3,ETFB,FN1,GAS7,GCA,HLA-A,HP,HSD11B1,HSPA5,ICAM1,IFI35,IFNGR1,IL1B,IL1R2,IL6R,ITGAL,JUN,JUNB,KLF10,LCN2,LITAF,LRG1,LRRFIP1,LSM4,MCM7,MGLL,MMP8,MMP9,MPDU1,MYC,OAS1,OGDH,OSM,PCNA,PDCD4,PEPD,PGK1,PKIG,POLR2E,PRDX2,PREP,PSMB8,PSMB9,PYGL,RNASE4,S100A8,S100A9,SERPINB1,SLC16A3,SLC39A7,SLPI,SORD,…	697 (20)
TRIM24		transcription regulator	Inhibited	-3.555	bias	7.04e-07	Bst2,DDX60,EIF5A,EMB,EPSTI1,Ifi27l2a/Ifi27l2b,IFI35,Ifi47,IFNGR1,LGALS3,LGALS3BP,Ly6a (includes others),Ms4a4b (includes others),OAS1,PHF11,PLAC8,PSMB10,PSMB8,PSMB9,S100a11,SAMHD1,SHISA5,TGFBI,TP53,TRAFD1	234 (7)
ZBTB33		transcription regulator		0.378	bias	7.25e-07	BAX,BCL6,BID,CDKN1A,FAS,MTA2,MYC,PGK1,S100A4	294 (6)
TET2		enzyme		-0.626	bias	7.36e-07	ADAM8,ADORA2B,AHNAK,APOBEC1,ATP1A3,C5AR1,Ccl2,DDB1,FAM129A,FAM129B,FBXL5,FGL2,FN1,HAL,HIST1H3B,IFI16,IFITM3,IL1B,ITGB2,LXN,MMP8,Orm1 (includes others),RAB44,RND3,RNF144A,S100A8,SORL1,Spink2,TRIOBP	273 (7)
VHL		transcription regulator		-0.012		7.47e-07	AIF1,CDKN1A,CDKN1B,CFL1,COPS5,CXCR4,FN1,FTL,GLO1,GPX1,H2AFX,HNRNPA2B1,IFITM3,LMNA,MAD2L1,MAVS,MIF,NEDD9,NOSIP,PCNA,PISD,PPIL1,RPS6,SEC61G,SLC16A3,SLC40A1,TP53,UQCRQ,VCAM1,VIM	814 (23)
resveratrol		chemical drug		-0.704		8.1e-07	AIF1,ALOX5,ATF3,BAX,BCL2A1,BIRC5,BSG,Ccl2,CCNB1,CD14,CD68,CDK4,CDKN1A,CDKN1B,CNBP,COX4I1,CS,CX3CR1,CYBB,CYP4F2,ECE1,EGR1,FAS,FN1,GPX1,HSPA5,ICAM1,IL1B,ITGA1,ITGAL,JUN,LITAF,MALAT1,MMP9,MYC,NCOA4,NDUFA13,NDUFA2,NDUFB8,PCNA,PDCD4,PPP1R15A,PSMB5,RAN,SOD1,SQSTM1,TP53,UQCRC2,VASP,VCAM1,XBP1	642 (17)
salmonella minnesota R595 lipopolysaccharides		chemical - endogenous non-mammalian		-1.209	bias	8.53e-07	ACSL1,ARHGAP25,Ccl2,Ccl6,CCRL2,CEBPD,EGR1,FPR1,FPR2,HLA-DMA,HLA-DMB,HLA-DQA1,ICAM1,IL1B,IRF8,JUN,JUNB,MCM2,Ms4a4b (includes others),NFKBIZ,PILRA,SAMHD1,Slfn1,SLFN12L,Slfn2,TFEC,Tnfsf9,VCAM1	661 (18)
thapsigargin		chemical toxicant		1.733	bias	8.6e-07	ADIPOR1,ATF3,BAX,BCL6,C5AR1,CALR,CAMP,Ccl2,CDKN1A,EGR1,EIF2A,EVI2A,FN1,GADD45A,HDC,HSP90B1,HSPA5,HSPA9,ICAM1,IER2,IL1B,ITGB2,JUN,LMAN1,LMAN2,MMP9,MYC,NFE2L2,NR4A1,PCNA,PPP1R15A,RETSAT,SRI,TP53,VCAM1,XBP1	541 (18)
ZBTB16		transcription regulator		-1.59		8.8e-07	BCL6,BID,Ccl2,CCNA2,CCR2,CD14,CD180,Cd24a,CD3D,CD44,CD55,CD74,CD81,CDKN1A,CLEC4C,EMB,F13A1,IFNGR1,IL18RAP,Klrk1,LMO4,LTB4R,Ly6a (includes others),LY86,MMP9,MYC,NFKBIZ,Nptn,SOX13,TMEM176B,TSC22D3	194 (4)
MTPN		transcription regulator		1.659	bias	8.88e-07	ANXA1,BAX,BCL2A1,Calm1 (includes others),CASP8,Ccl2,CCNA2,CCNB1,CCNB2,CDK1,FAS,FN1,JUN,LTB,MIF,Mt1,MYC,S100A10,S100A8,TNFRSF1A,TUBA1A,VCAM1	545 (10)
PSEN2		peptidase		-0.482		1.05e-06	ACSL1,ANXA5,ANXA6,BAX,C3AR1,CAP1,CCS,CD74,CD9,COX4I1,COX5A,COX7A2,COX8A,CTSC,CTSS,CTSZ,DHRS7,EMP1,Erdr1,GAPDH,HLA-E,NDUFS8,PRC1,PSTPIP1,TP53	707 (14)
PLA2R1		transmembrane receptor	Activated	2.487	bias	1.18e-06	ALDH2,ATP5F1B,ATP5PD,CTSA,DPYSL2,MGST1,NDUFA5,NDUFS3,PEBP1,SDHA,SDHB,UQCRFS1
ATM		kinase		1.333	bias	1.19e-06	BAX,CDK4,CDKN1A,CDKN1B,CDKN2D,DUSP1,FAS,FN1,GADD45A,H2AFX,HSP90AA1,HSP90AB1,HSPE1,JUN,PCNA,PPP2R5D,PSMC4,PSME2,RRM1,TP53	742 (20)
TERC		other				1.35e-06	AURKA,CDC20,CDKN1A,CDKN1B,EGR1,Erdr1,GPI,H1F0,Ngp,Orm1 (includes others),PRC1,S100A9,TUBB2A	608 (13)
NRF1		transcription regulator	Activated	3.208	bias	1.36e-06	COX4I1,COX5A,Cox5b,COX6A1,COX6B1,Cox6c,COX7A2,COX7B,Cox7c,COX8A,CYCS,IL1RN,Mt1,SDHA,SDHD,TP53,VDAC1
NFYA		transcription regulator	Activated	2.007	bias	1.39e-06	CALR,CAT,CCNA2,CCNB1,CCNB2,CDCA8,CDK1,CDKN1A,EGR1,GADD45A,HLA-DQB1,HSPA5,ICAM1,JUN,JUNB,LMAN1,PADI4,PGK1,PPP1R15A,PTTG1,TOP2A,TXNIP	769 (19)
testosterone		chemical - endogenous mammalian	Activated	2.539	bias	1.49e-06	ACSL1,ANXA1,ANXA3,ARG2,ARRB2,ATP5PB,BAX,BCL7B,CASP8,CAT,CDK4,CDKN1A,CDKN1B,COX5A,CTSV,EGR1,EIF2S1,FAM89B,FAS,FN1,GADD45A,GDI2,GUSB,HDC,HNRNPK,HSP90AB1,HSPA1A/HSPA1B,HSPD1,IL1B,INHBA,JUN,LGALS1,MGST1,Mt1,MTA2,OAT,PARP1,PCNA,PDIA4,PSMA1,PSMA2,PSMB1,PSMC3,PXN,RAF1,RARA,RPL21,RPS11,SNRNP25,STAT3,THBS1,TK1,TOP2A,TUBB2A,UBE2B,VCAM1,VCAN,YWHAE	610 (17)
triamterene		chemical drug	Activated	2.09	bias	1.53e-06	ANXA1,CD14,CD44,EMP3,FCGR2A,LCN2,LGALS3,LXN,MCM3,Ms4a6b,MYC,PSMB10,PSMB8,RBM3,S100A10,TMEM173,Tpm1,TUBB,VIM
cytarabine		chemical drug	Activated	2.007	bias	1.53e-06	BAX,CCNB1,CD180,CD40,CD55,CDK1,CDKN1A,FAS,GADD45A,GAPDH,HLA-A,ICAM1,IL1B,LTB,PPP1CA,RAE1,SESN1,TOP2A,TP53	679 (18)
TO-901317		chemical reagent		-0.854		1.54e-06	ACSL1,ADIPOR1,ALDH2,ARG2,ASS1,C3,Ccl2,Ccl9,CCNB1,CDK4,CDKN1B,CFH,COMT,ECI1,ENO1,FABP5,FDPS,GPI,GSTP1,HMGN1,HP,HSD11B1,HSD17B12,IL1B,LGALS3,MCM6,MGLL,MID1IP1,MMP9,MPEG1,MRPS7,Mt1,Orm1 (includes others),PGLYRP1,PSMA5,PSMA7,PSMB2,PSMB8,PSME1,RARA,SCARB1,SIGMAR1,TKT	665 (21)
2-bromoethylamine		chemical reagent		1.432	bias	1.61e-06	ANXA1,CD14,CD44,EMP3,FCGR2A,LCN2,LGALS3,LXN,MCM3,Ms4a6b,MYC,RBM3,S100A10,TMEM173,TUBB,VIM
guanidinopropionic acid		chemical - endogenous non-mammalian	Activated	3.987	bias	1.61e-06	ATP5MC1,ATP5PO,COX4I1,CYC1,CYCS,NDUFA1,NDUFA12,NDUFA3,NDUFA5,NDUFB2,NDUFB4,NDUFB8,NDUFS7,SDHA,SDHB,UQCRB
SATB1		transcription regulator		1.445		1.69e-06	ACTG1,BCL2A1,CD40,CDKN1A,CEACAM1,CSF3R,CTNNA1,CYBB,EBI3,EPSTI1,EVI2A,F5,FAM129A,FCGR1A,GLRX,HLA-DMB,HSP90AA1,HSPA8,HVCN1,IL16,IL18RAP,IL1R2,ILF3,IRF8,NFE2L2,PSMD2,PTGES3,RPLP0,SUN2,TNFSF13B,TSC22D3,UHRF1,VIM,YPEL5	491 (7)
allopurinol		chemical drug	Activated	2.558	bias	1.72e-06	ANXA1,CAT,CD14,CD44,EMP3,FCGR2A,IL1B,LCN2,LGALS3,LXN,MCM3,Ms4a6b,MYC,PSMB10,PSMB8,RBM3,S100A10,TMEM173,Tpm1,TUBB,TXNIP,VIM	433 (16)
E. coli B5 lipopolysaccharide		chemical - endogenous non-mammalian	Inhibited	-2.224	bias	1.76e-06	ADH5,ADORA2B,ADRB2,ALDH2,BCL6,CAT,Ccl2,Ccl6,Ccl9,CCR1,CD40,CD44,CDKN1A,CDKN1B,CSF3R,CX3CR1,CXCR2,CXCR4,CYBB,DBI,DUSP1,EEF1A1,GPX1,HLA-A,HSD11B1,ICAM1,IL16,IL17RA,IL18RAP,IL1B,IL1R2,IL6R,ITGAL,JUNB,MAT2A,NCF1,NCF2,PPIA,PSMA5,SELENBP1,SOD1,STAT3,SUMO2,THBS1,TREM1,UBE2I	508 (16)
let-7a-5p (and other miRNAs w/seed GAGGUAG)		mature microRNA	Inhibited	-2.448	bias	1.86e-06	AARSD1,AURKB,BIRC5,BSG,CAPG,CARHSP1,CIAO2A,COMMD9,CSDE1,DAD1,DUSP12,GEMIN7,GYS1,IFRD1,ITGA1,LIN28A,MMP9,MRPS24,MRPS33,MYC,POLD2,POLR2C,RHOG,S100A4,SIGMAR1,SNAP23,SPCS3,STAT3,THBS1,TRMT1,UHRF1,VIM	279 (7)
dichlorovinylcysteine		chemical toxicant	Inhibited	-2.585		1.86e-06	ACAT1,AKR1A1,CDK4,ENO1,HAAO,HSPA9,PPA2,PRDX5,PSMA1,SORD,STIP1,TUFM
TFEB		transcription regulator	Activated	2.615	bias	1.99e-06	ATP6V0B,ATP6V1A,ATP6V1B2,ATP6V1C1,CTSA,CTSB,GBA,HEXA,IL1B,LAMP1,MCOLN1,NEU1,PSAP,SCPEP1
JAK2		kinase		0.781	bias	2.02e-06	BAX,Ccl2,Ccl9,CDKN1A,CDKN1B,CYBB,DCXR,EGR1,F10,F5,ICAM1,IL1B,LAT2,LCN2,LY6E,MYC,MYL12A,Neat1,NKG7,OSM,PFN1,PSMB9,RARA,SET,STAT3,THBS1,TP53,TRAM1	644 (20)
PPARGC1A		transcription regulator	Activated	4.671	bias	2.18e-06	ACADL,ACAT1,ATP5F1A,ATP5F1B,ATP5MF,ATP5PD,ATP5PO,BAX,BCAT2,C3,CAT,CD68,CDKN1A,CEBPD,COX4I1,COX5A,Cox5b,COX7B,CS,CYCS,DGAT1,GOT2,GPX1,IDH3A,IL1RN,INSIG1,LIPA,MCM3,MCM5,MCM6,NDUFB5,NDUFS8,NDUFV2,PGAM1,PHYH,PRDX3,PRDX5,SCARB1,SDHA,SOD1,TP53,TXN2,UCP2,UQCRFS1	508 (16)
PLAU		peptidase		-0.13		2.51e-06	C5AR1,Ccl2,FCGR1A,FN1,HLA-DMA,HSPA5,ICAM1,IFNAR2,IL1B,MMP9,OAS1,OAS3,PLAUR,S100A8,S100A9,SERPINB1,SLPI,TP53,VIM	825 (22)
IFN alpha/beta		group	Activated	2.94	bias	2.86e-06	BAX,BID,CCR2,CCRL2,CD40,CLEC10A,FGL2,GAS7,HLA-A,IFI16,Ifi27l2a/Ifi27l2b,IRF8,Ly6a (includes others),LY6E,Mx1,SLPI,TNFSF13,TNFSF13B,TREM1,TREM3,Treml4	653 (16)
LIN9		other	Activated	2.442	bias	2.9e-06	AURKA,BIRC5,BUB1B,CCNA2,CCNB1,CDK1,CDKN1A,PLK1,TMPO,UBE2C
cadmium chloride		chemical toxicant		1.518	bias	2.92e-06	ANXA5,EEF1D,EIF3I,EIF4E,GADD45A,HP,HSP90AA1,HSPA5,JUN,MCM7,Mt1,MYC,NFE2L2,Orm1 (includes others),PCNA,TP53	702 (18)
RNA polymerase II		complex				2.96e-06	AGPAT2,ATP13A2,Ccl9,CCNB1,CCNB2,CD14,CD40,CD82,CDKN1A,CXCR4,DCTPP1,DUSP1,ENO1,EXOSC8,GADD45A,GAPDH,HCST,HLA-DQA1,HPRT1,HSPA1A/HSPA1B,ICAM1,Ifi47,IFNGR1,IL1B,IL1RN,JUN,JUNB,KPNA2,MAD2L1,MCM3,MMP9,MYC,PCNA,POLB,PSMB9,RDM1,RND3,RPL10A,RPL12,RPL13A,RPS21,RPS3,RPS6,SDHC,Tmsb4x (includes others),TOP2A,WDR36	662 (19)
methylnitrosourea		chemical toxicant				2.96e-06	ATP1B3,AURKA,CDKN1B,EGR1,GSTP1,JUN,PCNA,PLAUR,PSMA7,PSME1,RPS11,RPS12,SOD1	708 (21)
SPI1		transcription regulator		-1.562		3e-06	BAX,BCL6,C3AR1,CCNA2,CCNB1,CCNB2,CD14,CD180,CD68,CDK1,CDK4,CDKN1A,CEBPE,CHIT1,CSF3R,CTSS,CYBB,GPX1,HK3,HMBS,HSPA8,IFITM3,IL1B,IL1R2,IL1RN,ITGAM,ITGB2,JUN,LIMD1,LTF,LY6E,MYC,NCF1,NCF2,PCNA,POLR1D,PSMB10,PSMB8,PSMB9,RPL18,TCP1,TFEC,TK1,TNFRSF14,TREM1,VIM	734 (19)
Cyp2c23		enzyme		0.034		3.01e-06	Ccl2,CCNA2,CCNB2,CCR2,CX3CR1,F5,IL36G,ITGAM,Stfa2/Stfa2l1
RBL2		other	Inhibited	-3.003	bias	3.08e-06	AURKA,AURKB,BUB1B,CASP6,CCNA2,CCNB1,CCNB2,CDK1,CDKN1A,CDKN1B,FAS,HADH,KLF10,KPNA2,MYC,PA2G4,PCNA,PLK1,PPM1G,PSMB2,RAF1,RANBP1,STMN1,XPC	626 (16)
decitabine		chemical drug		1.392	bias	3.18e-06	ADRB2,ALOX5,ARHGDIB,BAX,BTG1,CASP8,Ccl2,Ccl9,CCNA2,CCR2,CD44,CD9,CDK1,CDKN1A,CDKN1B,CDKN2D,COMT,COPA,CX3CR1,CXCR4,DNAJC15,DUSP1,EEF1A1,EEF1B2,EEF1G,EIF3F,FAS,FN1,GLRX,GPX1,GSN,GSTP1,HLA-E,HPRT1,HPSE,HSPA1A/HSPA1B,IFI16,IFI35,IL1B,IPCEF1,ITGA1,JUNB,JUP,LGALS3,LXN,MAFB,METAP2,MGST3,MMP9,MYC,NME1,OAS1,PABPC1,PCNA,PDLIM4,PTPRO,RASSF1,RNASE4,RPL11,RPL26,RPL37,RPL4,RPL9,RPS13,RPS25,RPS6,S100A10,SCARB1,…	773 (21)
fenamic acid		chemical reagent		1.987	bias	3.19e-06	ANXA1,CD14,CD44,EMP3,FCGR2A,LCN2,LGALS3,LXN,MCM3,Ms4a6b,MYC,PSMB10,PSMB8,RBM3,S100A10,TMEM173,Tpm1,TUBB,VIM
gentamicin C		chemical drug		1.886	bias	3.23e-06	ANXA1,CD14,CD44,EMP3,FCGR2A,LCN2,LGALS3,LXN,MCM3,Ms4a6b,MYC,PSMB10,PSMB8,RBM3,S100A10,Tpm1,TUBB,VIM
PDX1		transcription regulator		-1.256		3.29e-06	ACTG1,AKR1B1,ATF3,Atp5e,ATP5PD,ATP5PF,CAT,Ccl2,CD44,CRELD2,CXCR4,EGR1,FH,GRN,GUSB,HSPA5,IDH1,IL1B,INSIG1,JUN,JUNB,KLF10,LTA4H,LXN,MDH1,Mt1,MYC,NDUFB9,PAPSS2,PCNA,PDIA4,PDIA6,PHGDH,SDHA,Slc25a1,TXNIP	791 (22)
NR3C2		ligand-dependent nuclear receptor		-0.734		3.3e-06	BAX,BCL2A1,BID,Ccl2,CYFIP2,EGR1,FKBP1A,FKBP1B,FKBP4,FN1,GPX1,GPX3,HLA-DQB1,HMOX2,HSPA9,ICAM1,IDH3B,IL1B,INHBA,JUNB,LYST,MSRB1,PDHB,PPIB,TP53,TSC22D3	815 (20)
Hbb-b2		other		1.387	bias	3.46e-06	Ccl2,CCR2,CD44,CD74,CMTM3,CXCR2,CYBB,FN1,FTL,IL16,IL1B,ITGAM,LTB,LY86,NCF2	269 (7)
N-formyl-Met-Leu-Phe		chemical reagent	Inhibited	-2.26	bias	3.46e-06	ACTL6A,CAPG,CORO1C,FCGR1A,IL1B,ITGAM,ITGB2,IVNS1ABP,KIF23,MMP8,NDE1,OSM,RAC2,SIRPA,TAGLN2	778 (17)
RBL1		transcription regulator	Inhibited	-2.9	bias	3.82e-06	AURKB,CASP6,CCNA2,CDK1,CDKN1A,CDKN1B,DDB1,FAS,MCM2,MCM3,MCM5,MCM6,MCM7,MYC,PA2G4,PCNA,PLK1,RRM1,THBS1,TP53	646 (16)
vancomycin		biologic drug		1.151	bias	3.93e-06	ANXA1,C3,CAT,CCS,CD14,CD44,EMP3,FCGR2A,LCN2,LGALS3,LXN,MCM3,Ms4a6b,MYC,PSMB10,PSMB8,RBM3,S100A10,TMEM173,Tpm1,TUBB,VIM
NCSTN		peptidase		0.277	bias	4.27e-06	APH1A,Ccl9,CD14,CD68,CEBPD,FCGR2A,GRN,IRF8,Ly6a (includes others),NCF1,S100A1,TREM3,VIM	673 (7)
SRSF1		other		0.064		4.3e-06	AURKA,AURKB,BIRC5,FN1,LMNA,PLK1,PTBP1,SRSF6,SRSF7,Tmsb4x (includes others),TP53,VIM
IFRD1	-0.292	other	Inhibited	-3.44	bias	4.3e-06	CTSZ,DGAT1,DGAT2,EBP,MYC,NDUFA6,PPIA,PTTG1,RPL22,RPL39,TK1,TOR2A
ADRA1D		G-protein coupled receptor				4.68e-06	CCNB1,CDK1,CDKN1B,CEBPD,CSRP2,CTSV,DUSP1,EGR1,FABP5,FN1,JUN,NR4A1,PCNA,STAT3,TMPO	681 (19)
TP73		transcription regulator		-0.04		4.75e-06	ADORA2B,ARL5C,ATF3,AURKA,BAX,BID,BIRC5,BTG2,C3,Ccl2,Ccl6,Ccl9,CCNA2,CCNB1,CD55,CDC20,CDK1,CDKN1A,CDKN1B,CDKN3,COX4I1,DHRS3,EGR1,FAS,FEN1,FKBP1B,FN1,FXR1,G0S2,GADD45A,GRN,HPSE,HSPA1A/HSPA1B,IDH2,IL1B,IRF5,KIF22,KIF23,LCP1,LRG1,MCM6,MCM7,MYC,NCAM1,NRP1,NUPR1,P2RX4,POLD2,RAN,SHISA5,SNRK,Spink2,STMN1,THBS1,TNFRSF1A,TP53,TREM2,UBE2C,UBE2V1,Wfdc17,YWHAB	748 (25)
OGT	-0.342	enzyme		1.342		4.75e-06	ACO2,BAX,BIRC5,CDKN1A,CDKN1B,ETFB,JUN,JUP,MYC,NDUFA5,NDUFA6,NDUFA9,NDUFB6,NDUFC2,OGDH,PLK1,SQSTM1,SUCLG1,TP53,VIM	675 (19)
bisphenol A		chemical - endogenous mammalian		-0.657	bias	5.03e-06	ATG3,ATP5PO,BAX,C3,CDK4,CDKN1A,CDKN1B,EGR1,ENO1,Hnrnpa1,HSP90AB1,HSP90B1,HSPA1A/HSPA1B,LCN2,MAP1LC3B,MMP9,NR4A1,NUMB,PCBP1,PCNA,PEBP1,PRDX2,RPN2,SF3A3,SLC1A5,SNRPA1,Snrpe,SRSF3,STAT3,STK17B,TP53,TWF2	555 (21)
CDK4/6		group		-1.147		5.07e-06	AHNAK,C11orf58,EEF1B2,ENO1,FAM129B,G3BP1,LASP1,NOP58,PDLIM4,RPL10,RPL13,RPL27A,RPS6,SEC61B,TALDO1,TPI1,TUBA1B,TUBB,TUFM
methapyrilene		chemical drug		1.877		5.09e-06	ACADL,ACTG1,ANXA5,ASS1,ATF3,ATP6V1B2,BCKDHA,BTG2,CAT,CTSB,CTSS,CTSV,DBI,EEF1A1,EIF2S1,GADD45A,HSPA5,IFRD1,Mt1,MYC,NSFL1C,RIPK3,RPL13A,RPL27,RPS8,RPS9,STMN1,TP53,TUBB
GTF2I		transcription regulator		0	bias	5.16e-06	CAT,CD3D,CDKN1A,CDKN1B,HSPA5,MYC,PDIA4,THBS1
manganese		chemical - endogenous mammalian		0.816		5.16e-06	C5AR1,CDKN1A,GAPDH,GOLIM4,HSP90B1,HSPA5,PARK7,SLC40A1	282 (7)
staurosporine		chemical - kinase inhibitor		0.638		5.45e-06	ANXA5,BTG2,Ccl6,CDK4,CDKN1A,CDKN1B,CPNE3,CSF3R,FAS,FCGR2A,HDC,ICAM1,IL1B,ITGB2,KLF10,MMP9,MYC,NCF1,NEDD9,NR4A1,PHB,PRDX1,RPS11,Srgn,TK1,TP53	572 (19)
phorbol myristate acetate		chemical drug		-1.782	bias	5.5e-06	ADAM15,ADAM8,AMER2,ANXA1,APRT,ARF4,ATP1A3,AURKA,AURKB,BAX,BCL2A1,BIRC5,BTG2,C3,C3AR1,C5AR1,CAPG,CAT,Ccl2,Ccl6,CCNA2,CCR2,CD14,CD44,CD55,CD68,CDK1,CDK4,CDKN1A,CDKN1B,CDKN2D,CLDN1,CMPK1,CSF3R,CTSB,CTSH,CTSV,CXCR2,CXCR4,CYBB,DEK,DUSP1,EBI3,ECE1,ECM1,EDF1,EEF1D,EGR1,EIF4A1,EIF4A3,EIF4E,EIF5A,EIF6,ERCC1,FAS,FCGR1A,FFAR2,GLRX3,GSTP1,HDC,HMBS,HNRNPF,HNRNPK,HPSE,HSD11B1,HSP90AB1,HSPA4,HSPA5,ICAM1,IFI35,I…	784 (19)
CDK1	0.265	kinase	Activated	2.425	bias	5.56e-06	BIRC5,CDC20,CDK1,CDKN1A,CDKN1B,H2AFX,JUN,NDUFB10,XBP1	783 (25)
17-alpha-ethinylestradiol		chemical drug	Activated	2.29		6.14e-06	C3,Ccl2,CCR1,CCR2,CD68,CD74,CDK1,CDKN1A,CFP,CTSS,CXCR2,EIF2S2,H2AFX,IFI16,IFI30,IL17RA,ISYNA1,JUN,LCN2,LY86,MANF,MMP9,NME1,PCNA,SCARB1,SCARB2,SESN1,SLC25A5,SLC40A1,TRA2B,VCAM1	720 (16)
IRF2		transcription regulator		0.237	bias	6.42e-06	ARCN1,CD14,CDKN1A,CDKN1B,CEACAM1,CFB,CLIC1,CTSS,EXOSC3,IDH1,IFI35,Ifi47,IL1B,IRF8,LCN2,MYH9,OAS1,PSMB10,PSMB8,PSMB9,PSME1,PSME2,SUPT16H,TMEM256,TNFSF13B,VCAM1	400 (16)
1,4-bis[2-(3,5-dichloropyridyloxy)]benzene		chemical toxicant	Activated	3.265	bias	6.42e-06	ACADL,BUB1B,CCNA2,CCNB1,CCNB2,CDC20,CDK1,CDK4,CDKN1A,CKAP4,CYP27A1,FAM107B,GSTP1,ICAM1,INSIG1,LRG1,MAD2L1,MCM5,MCM6,MCM7,Mt1,NEDD9,PAPSS2,PSMB7,TNFRSF1A,UCP2	635 (10)
AKT1	-0.274	kinase	Activated	3.356	bias	6.43e-06	ACAT2,ARL6IP1,ASS1,ATP5MC1,ATP5MC3,AURKB,BAX,BCL2A1,BIRC5,Ccl6,Ccl9,CD40,CD74,CDK4,CDKN1A,CDKN1B,CEBPD,CTSV,CXCR4,EBP,EGR1,ENO1,FABP5,FAS,FN1,GATM,GOSR2,GOT2,HNRNPM,LCN2,LIPA,MDH1,MMP9,MSR1,MYC,NFE2L2,RAMP1,RFC4,SIVA1,STUB1,THBS1,TK1,TP53,UBE2C,UBE2L3,VCAN,VCP,VIM	672 (17)
SMARCA4		transcription regulator		0.229	bias	7.09e-06	ADAM15,AHNAK,ALDH2,ARHGDIB,ASCC1,BATF,BCL2A1,BIN1,BIRC5,C1orf54,CCNA2,CCR1,CCR2,CCRL2,CD44,CD63,CD74,CDKN1A,CDKN1B,CDKN2D,CFP,CNP,CTSB,CTSH,CTSS,CXCR4,DHRS9,EDNRA,EGR1,EMP3,FAS,FCGR2A,FFAR2,FN1,GADD45A,GAPDH,GMFG,GPR183,GPX1,GSTO1,GSTP1,GYS1,HCLS1,HCST,HEXB,HLA-E,ICAM1,IFI16,IFI30,IFITM3,IL1B,INHBA,JUN,KDM6B,LGALS1,LGALS3,LMNA,LPXN,MAPK13,Mt1,MXD1,MYC,NFKBIZ,NPC2,NRP1,PLAUR,PLEKHO1,POLB,Ppfia4,PS…	771 (24)
EIF2AK3		kinase		1.337	bias	7.55e-06	ATF3,BTG2,Ccl2,CTSC,EGR1,GADD45A,HSPA5,HSPA9,IL1B,JUN,LMO4,MAP1LC3B,MYC,NARS,NUPR1,PON2,PPP1R15A,SARS,SHMT2,SQSTM1,TARS,TP53,TXNIP,XBP1	447 (18)
EGR1	-1.441	transcription regulator		1.336	bias	7.59e-06	ATF3,BAX,CASP6,CASP8,Ccl2,Ccl6,Ccl9,CCR1,CCR2,CD44,CDC20,CDKN1A,CDKN2D,EGR1,FAS,FN1,FTL,GADD45A,HPSE,ICAM1,IL1B,IL6R,ITGAM,JUN,JUNB,MAP1LC3B,MMP9,MXD1,MYC,NR4A1,SOD1,SQLE,THBS1,TP53,VCAM1	754 (19)
zVAD-FMK		chemical - protease inhibitor		-1.048		8.51e-06	ANXA5,BCL2A1,BIRC5,CD40,CDK4,CDKN1A,CDKN1B,Gm21596/Hmgb1,IL1B,MAP1LC3B,PSMB9,TP53,VCAM1	369 (15)
medroxyprogesterone acetate		chemical drug	Inhibited	-2.104		8.6e-06	BAX,BIRC5,BTG2,Ccl2,CCNB1,CCNB2,CD44,CDK1,CDKN1B,CLDN1,CXCR4,FAS,FN1,HSD11B1,ICAM1,IL1B,IL6R,ITGB2,JUN,JUNB,LMNA,MCM5,MYC,NUSAP1,PRC1,SLPI,VCAN	678 (20)
PTGES		enzyme		-0.314		8.72e-06	ANXA1,BIRC5,Ccl2,CDKN1A,CDKN1B,CYBB,EGR1,IL1B,ITGAL,MMP9,MYC,NCF1,PPA1,RPS19,VIM,VPS72	717 (25)
mitomycin C		chemical drug		1.03	bias	8.72e-06	ATF3,BAX,BIRC5,BTG2,CCNB2,CDKN1A,EGR1,FAS,GADD45A,JUN,MALAT1,PARP2,PPP1R15A,PYCARD,SRSF6,SRSF7,TP53	714 (22)
dihematoporphyrin ether		chemical drug		1.353	bias	9.16e-06	CDKN1A,DUSP1,HSP90B1,HSPD1,RAF1,TP53	269 (7)
THBS4		other	Activated	2.75		9.17e-06	CALR,Ccl2,CD40,CRELD2,HSPA5,ICAM1,MANF,MMP8,P4HB,SDF2L1,VCAM1	565 (10)
COPS5	0.345	transcription regulator		-0.24		9.76e-06	AIMP1,BAX,CDKN1A,CDKN1B,GPS1,H2AFX,RARS,STAT3,TP53	595 (22)
Rb		group	Inhibited	-3.889	bias	9.77e-06	AURKB,BIRC5,CCNA2,CDK1,CDKN1A,CDT1,GMNN,MAD2L1,MCM3,MCM5,MCM7,MYC,Ngp,PA2G4,PCNA,PLK1,RFC4,TOP2A,TP53	527 (16)
Ifnar		group	Activated	3.872	bias	1.02e-05	Bst2,C3,Ccl2,CD40,CD74,HLA-A,HLA-E,HLA-G,IFI16,IFI35,IFITM3,IFNGR1,IL1B,IRF8,MMP9,Mx1,NLRP3,OAS1,PSMB8,PSMB9,UNC93B1,VCAM1	445 (16)
ATF4		transcription regulator	Activated	2.757	bias	1.05e-05	APEX1,ATF3,CALR,CANX,CDKN1A,CDKN1B,CYP27A1,EIF2S2,GADD45A,GARS,GHITM,GYS1,HSP90B1,HSPA5,JUN,LGALS3,MAP1LC3B,MGST1,MID1IP1,MRPS7,NARS,NUPR1,PHGDH,PPP1R15A,PSAT1,SARS,SHMT2,SIGMAR1,SLC1A5,STAT3,TKT	852 (21)
ADRA1A		G-protein coupled receptor				1.1e-05	CCNB1,CDK1,CDKN1B,CEBPD,CSRP2,CTSV,DUSP1,EGR1,FABP5,FN1,JUN,NR4A1,PCNA,STAT3,TMPO	584 (16)
MRTFA		transcription regulator	Activated	2.777		1.11e-05	CAMP,CD177,CEBPE,CLDN15,CNN2,COMT,CXCR4,CYFIP2,EGR1,G0S2,HLA-A,ICAM1,LCN2,LTF,MAPK13,MGST2,MMP9,MOGAT2,MYH9,Ngp,PGLYRP1,PRSS57,RAMP1,S100A8,S100A9,SCARB1,SERINC3,SLPI	312 (10)
wortmannin		chemical - kinase inhibitor		-0.52	bias	1.11e-05	ATF3,BAX,BIRC5,Ccl2,CD14,CD44,CDKN1A,CDKN1B,CDKN2D,CEBPD,EGR1,EIF1AX,FN1,G3BP1,GSTP1,ICAM1,IL1B,IRF8,ITGAM,JUN,M6PR,MMP9,MSR1,MYC,NFE2L2,NR4A1,NT5E,OGT,PCNA,PXN,RETSAT,SCARB1,TP53,TPI1,VCAM1,VIM	646 (16)
CD44	-0.377	other		-0.315	bias	1.12e-05	ADAM8,ADRB2,ANXA11,BIRC5,CALR,Ccl2,CCR2,CD44,CD63,CDKN1A,CDKN1B,CLEC5A,COMMD3,CX3CR1,ECM1,FAS,FKBP4,FN1,GADD45A,HSP90AB1,IL1B,IL1R2,IL1RN,JUN,LGALS1,LGALS3,Ly6a (includes others),MMP8,MMP9,MYC,NECAP2,PDCD4,THBS1,VCAM1,VCP,VIM,WBP2	746 (19)
FAS	-0.699	transmembrane receptor		1.153		1.13e-05	API5,ARHGDIA,ARHGEF1,ARRB2,BAX,BCL2A1,BID,BIRC5,CASP8,Ccl2,CCR1,CCRL2,CD44,CD48,CDKN1A,CDKN1B,CEBPD,CXCR2,EGR1,ERCC1,F5,FAS,FGL2,FPR1,HLA-DQB1,ICAM1,IL16,IL17RA,IL1B,JUN,LGALS3,LTB,LY75,MBOAT7,MIF,MMP9,NR4A1,OPTN,OSM,P2RX4,PDLIM7,PGLYRP1,PPP1R15A,PSTPIP1,PTP4A2,RARA,SLPI,SORL1,STK17B,TAGLN2,TNFRSF1A,TRIB1,TSPAN3,TWF2,TYK2,VCAM1,XPC	451 (16)
NS-398		chemical reagent		-0.797	bias	1.17e-05	BAX,BIRC5,BTG2,CAPN2,CCNB1,CDKN1A,CDKN1B,CXCR4,ICAM1,IL1B,MMP9,PCNA,PDCD4,PRDX1,PSMB5,PSMB8,PSMB9,S100A8,S100A9,TP53,TREM1	649 (22)
trichostatin A		chemical drug		1.728	bias	1.18e-05	ANXA6,ARL6IP1,AURKB,BAX,BCL2A1,BRMS1,BTG1,CAMP,Ccl2,CCNA2,CCNB2,CD14,CD44,CD9,CDC123,CDK1,CDKN1A,CDKN1B,CDKN2D,CENPM,CKS1B,CLDN1,CSF3R,CXCR4,CYBB,DDT,DUSP1,FAS,GADD45A,GSN,HDAC3,HLA-DQB1,HPSE,HSPA5,ICAM1,IL1B,IPCEF1,IRF8,ITGA1,ITGAM,JUP,KIF20A,LGMN,LMNA,MAT2A,MBNL1,MCM3,MCM6,MGST3,MMP9,MXD1,MYC,NRP1,OAT,OSM,PCNA,PHB,PLK1,PMM2,POLB,PSMB2,RAB6A,RARA,RASSF1,RND3,RPL13,S100A10,SPCS2,SQSTM1,STMN1,STT3…	783 (18)
ethionine		chemical toxicant		0.832	bias	1.18e-05	ANXA1,CD14,CD44,LCN2,LGALS3,MCM3,Ms4a6b,MYC,PSMB10,PSMB8,S100A10,SLC25A3,Tpm1
prostaglandin E2		chemical - endogenous mammalian	Inhibited	-2.694		1.25e-05	ADORA2B,ATF3,BAX,BIRC5,BTG1,C5AR1,CAMP,CASP6,Ccl2,CCNB1,CCR1,CD14,CD300E,CD40,CD44,CD55,CDKN1A,CEBPD,Clec2d (includes others),CXCR4,DGAT1,DUSP1,EGR1,FAS,FN1,HDC,ICAM1,IL16,IL1B,IL1R2,IL1RN,ITGAM,JUN,LMNA,MAFB,MMP9,MYC,NEDD9,NR4A1,NRP1,NT5E,OSM,S100A8,THBS1,TP53,TRAP1,TREM1,TSC22D3,UCP2,VIM	494 (17)
BDNF		growth factor	Inhibited	-2.156		1.25e-05	ACOT7,ADRB2,ANXA5,APEX1,ATP1A3,ATP5MC2,BID,CDKN1A,CXCR4,DUSP1,EEF1D,EEF2,EGR1,FTL,GDA,GPS1,HADHA,HSD17B12,HSD17B4,HSPA5,IFRD1,JUN,KLF10,LCN2,LGALS1,MALAT1,MVD,NCAM1,NR4A1,PCNA,PLXNB2,PREP,PTBP1,REEP5,RNH1,RPL13,Rpl23a,RPL35A,RPL37A,RPS23,S100A10,S100A9,SORL1,THBS1,TMBIM6,TMED2,Tmsb4x (includes others),TUBA1A,TXNIP,VIM	708 (20)
IRF3		transcription regulator		1.68	bias	1.25e-05	AHNAK,ANXA4,ARG2,BC147527,Bst2,Ccl2,CCRL2,CD40,DDX60,FAS,FCGR1A,FN1,IFI16,Ifi27l2a/Ifi27l2b,Ifi47,IFITM3,IL1B,IRF5,JUNB,Klrk1,LCN2,MMP9,Ms4a4b (includes others),Mx1,OAS1,OAS3,PHF11,PLAC8,PNP,POLR3C,RPS7,Slfn1,SORL1,TMPO,TREX1,VIM	318 (14)
L-dopa		chemical - endogenous mammalian		-0.324		1.35e-05	ABCB8,AIF1,ARG2,ARRB2,BANF1,BAX,C12orf43,C1GALT1C1,CAP1,CAPG,CCS,CD63,Clec2d (includes others),CLN6,COMT,Cox5b,CTSB,CTSC,CTSZ,DCTN3,DDOST,DENND1C,DGAT2,DPP7,DUSP1,ECE1,EIF6,ERLIN1,FDPS,FTL,GAPDH,GAS7,GOLIM4,GPS1,H2AFX,HCLS1,HCST,HEXA,HEXB,HLA-A,HVCN1,IFNAR2,IL18BP,IQGAP1,JUNB,KARS,LASP1,LAT2,LMNA,MAP3K1,MAT2A,MIEN1,MRPL48,MSRB1,MVB12A,MXD1,NDUFA5,NPC2,NPM3,NT5E,P2RY6,PA2G4,PCYT2,PDCD4,PLD4,PLEK,P…	306 (7)
methylnitronitrosoguanidine		chemical toxicant		0.035	bias	1.36e-05	BAX,BTG1,BTG2,CDKN1A,CEACAM1,EGR1,FAS,GADD45A,KLF10,POLB,TP53	717 (22)
chrysotile asbestos		chemical toxicant		1.949	bias	1.36e-05	Ccl6,Ccl9,CCNB2,CDC20,CTSS,CTSZ,HSP90B1,HSPA5,IL1B,PDIA4,TP53	642 (16)
HGF		growth factor	Activated	2.179	bias	1.38e-05	AIMP2,ATF3,AURKA,AURKB,BCL2A1,BIRC5,BUB1B,CASP8,Ccl2,CD40,CD44,CDC20,CDK1,CDK4,CDKN1A,CDKN1B,CDKN3,CKS1B,CNBP,CSE1L,CXCR4,DKC1,EBP,EGR1,EMP1,FEN1,FN1,FPR2,GBA,GMNN,GPSM2,ICAM1,IL1B,INHBA,INSIG1,IRF8,KIF22,LCN2,LGMN,LY75,MAD2L1,MAT2A,MCM2,MCM5,MMP8,MMP9,MYC,NR4A1,NRP1,PCNA,PGAM1,PGK1,PHB,PLAUR,PLK1,PRC1,PTTG1,S100A9,SNRNP70,STK10,TACSTD2,TAGLN2,THBS1,TMEM97,TNFRSF1A,TP53,TRIB1,UBE2C,VCAM1,VIM,YWHAH	694 (20)
EDN1		cytokine		-0.666	bias	1.4e-05	ANXA1,ANXA4,ANXA5,ANXA6,BCL2A1,CDK1,CDKN1B,CXCR4,CYBB,EDNRA,EGR1,FN1,GRN,HSPA5,HSPA8,ICAM1,INHBA,ITGAM,JUN,JUNB,MMP9,MYC,NCF1,NPM1,PDIA6,PLAUR,PXN,RPSA,SOD1,THBS1,TP53,TPT1,VCAM1,VCAN,VIM,YWHAE	628 (16)
MAX	-0.749	transcription regulator		-0.373		1.41e-05	APEX1,BAX,BCL6,Ccl6,CCNB1,CDK4,CDKN1A,CDKN1B,CSDE1,CYCS,DKC1,GADD45A,KLF10,MYC,NPM1,RBBP7,SCPEP1,SERINC3,SLC2A3,TXNIP,UBE2C	451 (4)
hexachlorobenzene		chemical toxicant		1.058	bias	1.44e-05	ANXA1,CD14,CD44,EMP3,FCGR2A,LCN2,LGALS3,LXN,MMP9,Ms4a6b,MYC,PSMB10,PSMB8,S100A10,Tpm1,VIM	615 (16)
ATP		chemical - endogenous mammalian		-0.927	bias	1.47e-05	BAX,BIRC5,CAPN1,CAPN2,Ccl2,CD14,CDKN1B,CLDN1,CXCR4,DUSP1,H2AFX,ICAM1,IL1B,IL1RN,ITGAM,LCN2,MYC,NR4A1,NRP1,P2RX4,P2RX7,THBS1,TP53,VCAM1	676 (18)
TBX2		transcription regulator	Activated	3.144		1.48e-05	ASF1B,ATF3,AURKA,AURKB,CCNA2,CCNB1,CDCA3,CDK1,CDKN1A,CDT1,CKS1B,MAD2L1,MCM2,MCM5,MCM6,MCM7,PLK1,PRC1,TIPIN	616 (17)
Pam3-Cys-Ser-Lys4		chemical reagent		-0.019	bias	1.48e-05	BATF,BCL2A1,CASP8,Ccl2,CCR1,CCR2,CD180,CD40,CD55,CLDN1,CXCR2,EBI3,FCGR2A,HLA-A,HLA-DRB5,ICAM1,IL1B,ITGB7,JUN,KDM6B,LTB,MMP9,NFKBIZ,NLRP3,RAE1,SLC16A3,SLC40A1,TNFSF13B,Tnfsf9,Wfdc17	525 (16)
IKBKB		kinase		-0.954	bias	1.6e-05	ATF3,AURKB,BAX,C3,CASP8,Ccl2,Ccl9,CCNA2,CCR1,CD44,CDKN1A,CEBPD,CKS1B,CTSB,CTSZ,CXCR4,EGR1,FAS,GADD45A,GM2A,GRN,H2AFX,HLA-A,ICAM1,IFI16,IL1B,IL1RN,JUNB,KIF20A,KIF23,LCN2,LMNB1,LTB,MAT2A,MMP9,Mt1,MYC,PLK1,S100A4,Slfn2,STAT3,TMEM176B,Tmsb4x (includes others),TP53,VCAM1,VCAN	723 (17)
CCND1		transcription regulator		1.063		1.61e-05	AHNAK,AURKA,BIRC5,Bmyc,C11orf58,CCNA2,CD44,CDCA8,CDK4,CDKN1A,CDKN1B,CPNE3,EEF1B2,ENO1,FAM129B,G3BP1,GALNT11,HSPA1A/HSPA1B,HSPA8,KDM6B,KIF20A,LASP1,MCM7,MYC,NCAPH,NOP58,NT5E,PCNA,PDCD4,PDLIM4,PLK1,RACGAP1,RFC5,RPL10,RPL13,RPL27A,RPS6,SEC61B,SELENBP1,SERINC3,STOM,TALDO1,TMEM219,TOR3A,TP53,TP53INP2,TPI1,TUBA1B,TUBB,TUFM,UHRF1,USE1	658 (20)
IRF7		transcription regulator	Activated	2.266	bias	1.62e-05	ATP5F1A,BC147527,Ccl2,CCRL2,CD40,FCGR1A,IFI16,IFI35,Ifi47,IFITM3,IRF5,IRF8,ITGAM,Ly6a (includes others),Ms4a4b (includes others),Mx1,OAS1,OAS3,PHF11,PLAC8,PLSCR1,PSMB10,PSMB8,PSMB9,PSME1,PSME2,S100A8,Slfn1,TMBIM6,TMPO,TNFSF13B,TREX1	376 (17)
bromobenzene		chemical toxicant		0.704		1.63e-05	CAPN1,CDKN1A,CTSV,FDPS,GADD45A,GAPDH,GSTP1,HSP90AA1,HSPA5,JUN,Mt1,MYC,PPP1R15A,RPL22,RPL28,RPL35,TUBA1A,YWHAQ
farnesol		chemical reagent		1.6	bias	1.64e-05	ATF3,CCNB1,CDKN1A,CDKN1B,HSP90B1,HSPA5,PDIA4,TP53,XBP1	725 (22)
7-ketocholesterol		chemical - endogenous mammalian		-0.333		1.64e-05	BAX,CYBB,EGR1,FDPS,HSPA5,ICAM1,ITGAL,SCARB1,TP53	355 (20)
CREB1		transcription regulator		1		1.68e-05	ATF3,ATP6V0B,AURKA,BCAP29,BIRC5,BTG2,CCNA2,CCNB1,CCNB2,CD3D,CD68,CD9,CDC37,CDCA8,CDKN1A,CEBPD,COX8A,CSRP2,CXCR4,CYFIP2,DUSP1,EBI3,EBP,ECM1,EGR1,EHD4,ESD,FGL2,FN1,GAA,GADD45A,GDA,HLA-A,HLA-DQB1,HLA-G,HSD11B1,HSPA4,HSPA5,IER2,Ifi202b,IL1B,INHBA,JUN,JUNB,KLF7,LCN2,LITAF,MAT2A,MCM5,MCM6,MCTP1,MRPS18B,MVD,MYC,NDUFA10,NDUFA4,NDUFV1,NPC2,NR4A1,NRP1,OSTF1,PCNA,PDXK,PPP1R15A,PRCP,RNH1,SLC2A3,SQSTM1,SSR4,S…	690 (20)
ZFHX3		transcription regulator				1.69e-05	DOHH,EIF3K,GSTP1,HLA-A,IFITM3,MIF,NDUFS7,PLA2G7,POLR2I,PTTG1,RASL11B,RPL37,Rplp1 (includes others),RPLP2,RPS12,RPS14,RPS28,SSB,TUBA1A,TUBA1B,UQCR10
bezafibrate		chemical drug	Activated	3.279	bias	1.73e-05	ABCD1,ACADL,ACSL1,APEX1,CAT,CCNB1,CDK4,COX4I1,CS,DBI,ECI1,HADHA,HADHB,HSD17B4,HSPA5,INSIG1,LGALS3,MGLL,NPC2,PCNA,TSPO,UCP2	490 (17)
NELFB		other		1.134		1.74e-05	ATF3,CDKN1A,GADD45A,Ifi27l2a/Ifi27l2b,MAD2L1,RPLP0,RPS3
cucurbitacin B		chemical - endogenous non-mammalian		-1.316		1.74e-05	BIRC5,CCNA2,CCNB1,CDKN1A,CDKN1B,MYC,TP53	361 (16)
ATF6		transcription regulator	Activated	3.332	bias	1.75e-05	AURKA,CALR,CDKN3,DNAJB11,FDPS,HSP90B1,HSPA5,LMAN1,LMF1,MANF,MAP1LC3B,PDIA4,PRDX2,RAN,SLC35B1,UBE2C,XBP1	435 (12)
TNFSF13B	-0.529	cytokine		0.489	bias	1.75e-05	ARCN1,BAX,BCL2A1,BCL6,CD40,CDK4,CTSS,GPR183,HLA-DMB,HLA-DQA1,ICAM1,JUN,MMP9,MYC,PLK1,TFG,TP53	438 (16)
lomustine		chemical drug		1.698	bias	1.75e-05	ANXA1,CD14,CD44,EMP3,FCGR2A,LCN2,LGALS3,LXN,MCM3,MYC,PSMB8,RBM3,S100A10,TMEM173,Tpm1,TUBB,VIM
epothilone B		chemical drug	Inhibited	-2.138		1.89e-05	BTG2,BUB3,CDK1,CDKN1A,CDKN1B,FAS,THBS1,TOP2A	507 (11)
estrogen		chemical drug	Activated	3.658	bias	1.93e-05	ALDH1B1,ATP5PF,AURKA,CCNB2,CDKN1A,CDKN1B,CKS1B,COMT,CYBB,DUSP1,EGR1,FAS,FEN1,FN1,ICAM1,IL1B,JUN,JUNB,LCN2,LGALS1,LTF,MCM3,MCM5,MCM7,MTA3,MVD,MYC,NME1,NR4A1,OAT,PCNA,PHF5A,PISD,PSMA2,PTTG1,RAF1,RARA,RFC3,SCARB1,SOD1,SRM,Tmsb4x (includes others),TOP2A,TP53,UHRF1,XBP1	730 (23)
PRKAA2		kinase		0.652	bias	2.02e-05	ACOT7,ARHGDIB,ATP5MC2,BAX,CD302,CDKN1A,CDKN1B,COX4I1,CYBB,EGR1,FN1,HSPA5,LMO4,Ly6a (includes others),MGST1,MMP9,NCF1,NCF2,OAT,P4HB,RAF1,SORL1,TP53,VIM	555 (21)
bee venom		chemical - endogenous non-mammalian		-1.462		2.06e-05	Arf2,Ccl2,CCNB1,CYBB,GADD45A,ICAM1,IFRD1,IL1B,IPO5,JUN,JUNB,KIF23,MYH9,NLRP3,NUPR1,NUSAP1,OSM,PPP1R15A,PRC1,Slfn2,Tnfsf9,TOP2A	546 (10)
EIF2AK2		kinase		0.237	bias	2.06e-05	ATF3,BAX,BCL2A1,BIRC5,CDKN1A,CEBPD,EGR1,FAS,IFI35,IL1B,LGALS3BP,MMP9,MYC,NEDD9,OAS1,OAS3,PLSCR1,PPP1R15A,PSMB10,SAMHD1,TP53,TUBA1A	402 (16)
TLR4		transmembrane receptor		1.449	bias	2.13e-05	ATF3,BATF,BAX,C3,CASP8,Ccl2,CD14,CD40,CD44,CEBPD,CERS5,CFB,COX4I1,CXCR2,EBI3,FAS,FGL2,HDC,HHEX,HLA-DQA1,HPSE,HSPA5,ICAM1,IDH2,IFI16,Ifi47,IFITM3,IL18BP,IL1B,INHBA,IRF8,ITGAM,LCN2,LMO4,LYST,MIF,MMP9,Mx1,MYC,NFKBIZ,NLRP12,NR4A1,PLEK,RGCC,SCARB1,SGMS2,SLFN12L,SMPDL3A,STAT3,TNFRSF13B,TREM1,TREM2,TREM3,TSPO,VCAM1,Wfdc17,XBP1	553 (15)
emodin		chemical drug		0.01	bias	2.32e-05	BAX,BIRC5,Ccl2,CCR1,CDKN1A,CXCR4,ERCC1,FN1,HSPA5,ICAM1,IL1B,IRF5,MMP9,SOD1,VCAM1,VIM	611 (16)
BAX	0.761	transporter	Activated	3.058	bias	2.38e-05	BAX,CCNB1,CDK1,CDKN1A,CDKN1B,CTSB,CTSH,CTSS,HLA-A,IFNAR2,MMP9,Mx1,PDIA6,TYK2,XBP1	634 (21)
HOXA10		transcription regulator		-1.145		2.39e-05	AIMP2,ARL2,ATF6B,CDKN1A,CSF3R,CTSV,CYBB,DHRS9,EIF3A,FKBP3,FN1,HLA-DQA1,HLA-DQB1,HMBS,HSP90AA1,IDH2,KLF10,LCN2,LTF,MAX,NCAM1,NCF2,NR4A1,P4HB,PHGDH,PROM1,PROS1,RHOG,RNASE4,RPL37A,STK17B,TNFSF13B,TP53
CD40	0.263	transmembrane receptor		0.322	bias	2.4e-05	BAX,BCL2A1,BCL6,BIRC5,CALR,Ccl2,CCNA2,CD40,CD44,CDK4,CDKN1A,CDKN1B,CYSLTR1,DUSP1,FAIM,FAS,HLA-DQB1,HSP90B1,HSPA5,ICAM1,IL1B,IL1RN,IL6R,ITGAL,ITGAM,ITGB2,JUN,LGALS3,Ly6a (includes others),MMP9,MYC,PSMB10,PSMB9,TNFRSF13B,TNFSF13B,TP53,VCAM1,XBP1	466 (17)
SLC13A1		transporter	Inhibited	-2.4		2.41e-05	ACTG1,COPB2,EEF1G,EFTUD2,G0S2,HLA-DMB,HSPA5,HSPA8,INSIG1,MAD2L2,MRGPRX3,Mt1,MVD,RPL41,RPL8,Rplp1 (includes others),RPN1,SDF2L1,ST13,TFG,XBP1	244 (7)
NOS2		enzyme		-1.79		2.42e-05	ADH5,API5,BAX,BCL2A1,BIRC5,Ccl2,Ccl9,CD14,CD44,CDKN1A,COX4I1,CSF3R,CTSC,CYCS,Erdr1,FAS,IL1B,IL1RN,LCN2,LGALS3BP,MCM5,MMP9,Orm1 (includes others),PCNA,PLSCR1,S100A8,SLC1A5,SLC40A1,SLFN12L,Slfn2,SPR,TKT,TNFSF13B,TOR3A	485 (16)
Pdgf (complex)		complex		0.804	bias	2.44e-05	BAX,Ccl2,CD44,CDKN1A,CDKN1B,EGR1,EIF2S1,EIF4E,F10,FN1,ICAM1,INHBA,JUN,JUNB,MCM6,MCM7,MYC,NCAM1,PCNA,PLAUR,TP53,VCAM1	631 (16)
E2F2		transcription regulator		0.754	bias	2.46e-05	BIRC5,CASP6,CCNA2,CCNB1,CCNB2,CDCA4,CDK1,CDKN1A,CDKN2D,ECE1,MCM2,MCM3,MCM5,MCM6,MCM7,MYC,PCNA,TP53	643 (16)
UDP-D-glucose		chemical - endogenous mammalian	Inhibited	-2.236	bias	2.5e-05	CALR,HSP90B1,HSPA5,PDIA3,PDIA4
bendamustine		chemical drug		0		2.55e-05	AURKA,BAX,CCNB1,CDKN1A,PLK1,TP53	507 (11)
PDGF (family)		group	Activated	2.449	bias	2.55e-05	CALR,EEF1B2,HSPD1,P4HB,PDIA3,VIM
curcumin		chemical drug		0.059		2.55e-05	AKR1A1,ALOX5,ATOX1,BAX,BIRC5,CAMP,Ccl2,CCNB1,CD44,CD81,CDK1,CDK4,CDKN1A,CDKN1B,CLIC1,COPS5,COX7B,CSNK1A1,CTNNA1,CXCR4,EGR1,EIF3H,EIF4E,FAS,FTL,GSTP1,HSP90B1,HSPA1A/HSPA1B,HSPA8,ICAM1,IL1B,ITGAM,JUN,JUNB,MIF,MMP9,MYC,NCAM1,NFE2L2,OGDH,POLR2C,SCARB1,SERPINB1,SOD1,ST13,STAT3,TNFRSF1A,TOP2A,TP53,TPT1,TSC22D3,UCP2,VCAM1,VIM	686 (17)
HIF1A		transcription regulator		1.634	bias	2.58e-05	ADAM15,ADORA2B,ATP5PF,AURKA,BID,BIRC5,Ccl2,CCR2,CD44,CDKN1A,CDKN1B,CLDN1,CXCR4,EIF4E,EIF5A,ENO1,FAM162A,FN1,GAPDH,GPI,H2AFX,HDAC3,HIST1H1C,HIST1H2AC,HP,HSPA4,HSPA5,IL17RA,IL1B,ITGA1,ITGB2,JUN,JUP,LGALS1,MANF,MIF,MMP9,MYC,NPM1,NR4A1,NT5E,NUDCD2,PGK1,PLAC8,PLAUR,PPIA,PROM1,RASSF1,SLC16A3,SLC2A3,SLC39A7,SLC40A1,SSBP1,STAT3,SUMO1,THBS1,TP53,TPI1,VASP,VCAM1,VIM	718 (19)
MAT1A		enzyme		1.092		2.65e-05	ACADL,BAX,EGR1,FAS,LTA4H,Mt1,PCNA,PHB,SOD1	500 (7)
SYVN1		transporter	Activated	3.306	bias	2.73e-05	APLP2,ASF1B,ATP1B3,CD44,DUSP1,EMC7,EXT2,FAS,HLA-A,HNRNPM,LGALS3BP,NFE2L2,NUDT21,PCBP1,PFN1,PSMC3,PTBP1,RPL10,RPL18,RPN2,SLC1A5,SLC2A3,SLC35B2,SNAP23,STOM,TARS,USP5
RET		kinase		0.731	bias	2.76e-05	ANXA1,ANXA4,Ccl2,CDKN1B,CTSB,CTSV,CXCR4,DPYSL2,EGR1,FKBP4,HSP90AA1,HSPA1A/HSPA1B,HSPA8,HSPA9,HSPD1,IL1B,MMP9,PLAUR,S100A9,ST13,STIP1,STUB1,TACC3,TP53	687 (20)
SIRT1		transcription regulator		-1.874		2.81e-05	ACAP1,ANXA4,BAX,BIRC5,CAT,Ccl2,CCNB2,CD74,CDKN1A,CDKN1B,COX4I1,CYCS,DDB1,DDX60,EBI3,EIF2S2,FN1,GADD45A,H2AFZ,HCK,HLA-A,HLA-DQA1,HLA-DQB1,HLA-DRB5,ICAM1,IDH2,Ifi47,IFITM3,IL1B,LGALS3,LGALS3BP,LY6E,MGAT2,MMP9,Ms4a6b,MYC,NDUFA5,NKG7,OAS1,PARP1,PHB,PSMB9,RPL10A,RPL13,SEC61A1,Slfn2,SNRNP70,STAT3,TACSTD2,TBC1D10C,TP53,UCP2,UQCRC2,UQCRFS1,XPC	811 (21)
fenofibrate		chemical drug		0.734		2.84e-05	ACAA2,ACADL,ACAT1,ACSL1,ADIPOR1,APEX1,CAT,Ccl2,CD40,CD68,DBI,DGAT1,DGAT2,ECHS1,EIF3E,GADD45A,GAPDH,GOT2,HADHA,HADHB,HP,HSD17B4,HSPA5,ICAM1,IRF8,JUN,MGLL,PAICS,PCNA,PDHB,PSMA4,SCARB1,SLC27A4,SOD1,STAT3,SUCLG1,TIMM17A,TP53,TSNAX,TXNIP,UCP2,VCAM1,VPS29	611 (22)
CYP1A1		enzyme		0.447		2.87e-05	ANXA3,ANXA4,ANXA7,AP2M1,BANF1,CBX3,CDKN2D,CNN2,COX6B1,ETHE1,Ifi27l2a/Ifi27l2b,LMNA,Mt1,NDUFA1,NDUFV1,PFDN1,RACGAP1,SDHB,SEPT2,TACC3,TMPO,Ugt1a7c
prednisolone		chemical drug	Inhibited	-2.516	bias	2.89e-05	API5,ATG3,BAX,BID,BTG1,CASP8,CAT,Ccl2,CDKN1B,CEBPD,CTSB,CTSS,CXCR4,DAD1,DUSP1,EDNRA,FAS,GAA,GABARAPL2,GM2A,GPX3,HSP90AA1,HSPA8,IL1B,ITGAM,MAP1LC3B,MRPS16,MYH9,PARK7,PGK1,POLB,PRDX1,PRDX2,SLC29A3,SOD1,SQSTM1,TP53,TSC22D3,TXNIP	661 (17)
EP400		other	Activated	2.413	bias	2.9e-05	AGPAT2,CCNA2,CDC20,CDCA3,CDKN1A,H2AFZ,INCENP,MCM3,PCNA,PLK1,RASSF1,TP53,UHRF1
sulforafan		chemical drug		0.527		2.9e-05	AKR1B1,Akr1c12/Akr1c13,BAX,BIRC5,CCNB1,CD44,CDKN1A,CDKN1B,FAS,FTL,GPX1,GSTP1,HP,ICAM1,IL1B,KEAP1,MMP9,Mt1,NFE2L2,PSMB5,SOD1,TALDO1,TKT,TP53,VCAM1,VIM	546 (17)
ursolic acid		chemical drug		0.414	bias	2.91e-05	AKR1B1,ATF3,BAX,CDKN1A,CXCR4,EIF2S2,EIF3C,IL1B,MMP9,MYC,NARS,PDCD4,SARS,STAT3,TP53,VCAM1	692 (20)
geranylgeranyl pyrophosphate		chemical - endogenous mammalian		-0.426		2.93e-05	BAX,BIRC5,CD55,CDKN1B,ICAM1,IL1B,MMP9,SCARB1,TP53,VCAM1	518 (17)
15-deoxy-delta-12,14 -PGJ 2		chemical - endogenous mammalian		0.097		3.01e-05	BAX,BIRC5,Ccl2,CCNB1,CDK4,CDKN1A,CEBPD,CTSB,CYBB,EGR1,FKBP4,FN1,GADD45A,GSN,GSTP1,ICAM1,IL1B,ITGAM,JUN,LAMP1,MAP1LC3B,MMP9,MSR1,MXD1,MYC,NFE2L2,PARP1,PRDX1,SCARB1,SOAT1,SOD1,TP53,VCAM1	712 (19)
SAFB		other		-0.258	bias	3.04e-05	BCCIP,CD74,EIF4B,HEXA,HLA-E,JUN,LTB,NEDD9,NUPR1,PAPSS2,PSMB9,RPL35A,S100A8,UBE2B,UQCRC2
niacinamide		chemical - endogenous mammalian		0		3.04e-05	BAX,BCL2A1,CAMP,CD14,CD40,CDKN1A,GAPDH,H2AFZ,ICAM1,ITGAM,JUNB,MMP9,MYC,PARP1,TP53	611 (17)
3-nitropropionic acid		chemical toxicant		1.72		3.04e-05	ATP5PF,ATP6V1B2,ATP6V1C1,BAX,COX6A1,COX6B1,GAPDH,GPI,JUN,MMP9,MYC,NPM1,SQSTM1,TP53,TPI1	803 (23)
GPS2	0.27	transcription regulator		-1.835	bias	3.05e-05	BIN1,Ccl2,CDKN1A,DHRS3,HEBP1,HP,IDH1,MBNL1,MCTP1,MYC,PID1,SHISA5,SNX1,VCAM1	353 (11)
AMPK		complex		0.755		3.06e-05	ACO2,BAX,BIRC5,CAT,Ccl2,CCNB1,CDKN1A,CLDN1,CS,CYBB,CYP4F2,EGR1,IDH3A,IL1RN,LITAF,MMP9,NCF1,OAT,PDHB,SDHA,SOD1,TP53,UCP2,VCAM1,VIM	725 (24)
LY294002		chemical - kinase inhibitor	Inhibited	-2.238	bias	3.21e-05	ACAT1,ADIPOR1,ADRB2,ATF3,AURKA,BAX,BCL6,BIRC5,BSG,BUB1B,Ccl2,CCNA2,CCNB1,CCR1,CCR2,CD14,CD44,CD74,CDK4,CDKN1A,CDKN1B,CDKN2D,DUSP1,EGR1,EIF1AX,ERCC1,FAS,FEN1,FN1,G3BP1,GPR183,GRN,GSTP1,HSP90AB1,HSPA5,ICAM1,IER2,IL1B,IL1R2,IL1RN,ITGAM,JUN,JUNB,JUP,KLF10,LCN2,LMNA,LMO4,MAT2A,MMP9,MXD1,MYC,NFE2L2,NR4A1,P2RY6,PCNA,PGK1,PMPCB,PRDX1,RAB6A,RFC4,RND3,SCARB1,SQLE,THBS1,TOP2A,TP53,TREM1,UBE2C,VCAM1,VCAN,VIM	548 (17)
N-acetyl-L-cysteine		chemical drug		0.301	bias	3.26e-05	ADIPOR1,ADORA2B,ATP1A3,BAX,BCL2A1,BSG,C3,Ccl2,CCR2,CDKN1A,CDKN1B,CXCR4,CYBB,DUSP1,EGR1,FAS,GSTP1,HDC,HSPA5,ICAM1,IL1B,ITGAM,JUN,LTB4R,MAP1LC3B,MMP9,MSR1,MYC,NCF2,NFE2L2,NLRP3,PARP1,PCNA,PLAUR,PRDX2,RAF1,TP53,VCAM1	675 (17)
doxifluridine		chemical drug		0.027	bias	3.3e-05	BAX,CDKN1A,FAS,GADD45A,RPL10A,RPL3,RPS27L,SESN1
glutamyl-Se-methylselenocysteine		chemical - endogenous mammalian		-0.707	bias	3.3e-05	EGR1,GSTP1,JUN,PLAUR,PSMA7,PSME1,RPS11,SOD1
RPTOR		other		-1.389		3.35e-05	ACADL,BIRC5,Ccl2,CDK4,COX4I1,EBP,ENO1,FCGR1A,FDPS,GPI,IL1B,IRF8,ITGAM,LY75,MVD,MYC,NLRP3,PYCARD,SQLE,TPI1	725 (20)
silibinin		chemical drug		-0.541	bias	3.35e-05	BAX,BIRC5,CCNB1,CD44,CDK1,CDK4,CDKN1A,CDKN1B,EGR1,FN1,MMP9,MYC,NFE2L2,PCNA,PLAUR,TP53,VIM	634 (20)
KIT		transmembrane receptor				3.38e-05	BIRC5,C3AR1,Ccl2,CCR2,CD44,CD63,CDKN1B,CXCR4,HDC,HSD17B10,ICAM1,IL17RA,ITGAM,ITGB2,LGALS3,LTB4R,MGST2,MYC,OSM,Ppp2r5c,PPP2R5D,STAT3	521 (19)
bleomycin		chemical drug		0.456	bias	3.39e-05	C3,Ccl2,Ccl9,CCR1,CCR2,CD68,CDKN1A,CDKN1B,CTSS,CXCR4,FAS,FN1,H2AFX,ICAM1,IL1B,ITGA1,LMNB1,MIF,MMP8,MMP9,MYC,NR4A1,PCNA,PTTG1,S100A4,STAT3,STK17B,STOM,THBS1,TINAGL1,TNFRSF1A,TP53,UBE2C,UHRF1	661 (19)
FOLR1		transporter				3.4e-05	ARHGDIB,ATP6V1B2,BCAT2,CAT,CD9,DNASE2,GBA,GLRX,IK,NAP1L1,PDCD4,PFN1,RPS24,S100A4,SNRPF,SORD,Srgn,SYNGR2,TAGLN2,TPI1,UBE2V1
Interferon alpha		group		0.415	bias	3.68e-05	ANXA5,ATF3,BCL2A1,BCL6,Bst2,BTG2,C3,C3AR1,CASP8,CCR1,CD40,CD81,CDKN1A,CDKN1B,CDKN2D,CEACAM1,DYNLT1,EPSTI1,FAS,FCGR1A,HLA-A,HLA-G,HSPA1A/HSPA1B,ICAM1,IFI16,IFI35,IFITM3,IFNAR2,IL17RA,IL18RAP,IL1B,IL1RN,IL6R,IRF5,IRF8,ITGAM,MCRS1,Mx1,MYC,NKG7,NPM1,NPM3,NT5E,OAS1,OAS3,PHF11,PLSCR1,PSMB8,PSMB9,PTBP1,RBCK1,S100A9,SERPINB1,SLC1A5,SLC2A3,Slfn1,SLFN12L,Slfn2,STAT3,TNFSF13B,TRIOBP,UNC93B1,VCAM1	416 (15)
ciprofibrate		chemical drug		0.654		3.78e-05	ACADL,Akr1c12/Akr1c13,BSG,CAT,CD63,CEACAM1,CSTB,CTSV,CYP27A1,DBI,GSTP1,HADHA,HAL,HSD11B1,HSD17B4,LCN2,LGALS3BP,MGLL,NPC2,OAT,Orm1 (includes others),PLSCR1,RBM3,RPL12,SCARB1,SELENBP1,SQSTM1,TAGLN2	561 (16)
GAST		other		1.047	bias	3.88e-05	ANXA7,ARCN1,EGR1,HDC,IMPDH2,JUN,MCM3,MMP9,NACA,NARS,PGK1,PHB,PLA2G7,PRDX3,RPL35A,RPL7,RPS19,STAT3,VCAM1	759 (21)
ZFP36	-0.575	transcription regulator		-0.713	bias	3.99e-05	CAMP,CDKN1A,CENPA,CTSS,CYBB,ICAM1,IL1B,JUN,LCN2,LTF,MXD1,Ngp,OSM,PLAUR,PRC1,S100A8,S100A9,SERINC3,TOP2A,VCAM1	510 (16)
2-(4-amino-1-isopropyl-1H-pyrazolo[3,4-d]pyrimidin-3-yl)-1H-indol-5-ol		chemical reagent	Inhibited	-2.868		4.11e-05	ASF1B,ATF3,AURKA,AURKB,BIRC5,CCNB1,EGR1,HIST1H1C,HIST1H2BI,IFRD1,KPNA2,NR4A1,SERPINB1,TCP11L2,TK1,TOP2A,TXNIP	255 (7)
selenomethylselenocysteine		chemical - endogenous mammalian		-1	bias	4.15e-05	ATP1B3,EGR1,JUN,PLAUR,PSMA7,PSME1,RPS11,RPS12,SOD1
NRG1		growth factor		-1.654		4.4e-05	ACAT1,BIN1,CAPN1,CDKN1A,CDKN1B,CHCHD3,CXCR4,DAD1,DUSP1,EEF1A1,EGR1,ETFB,FABP5,FN1,G3BP1,GDA,GPI,GPS2,GPX3,HNRNPK,IDH3B,IER2,IMMT,ITGAM,JUN,JUNB,LMO4,MGLL,MMP9,MSR1,MYC,NR4A1,PDCD4,PLAUR,PXN,SDHA,SLC2A3,VIM	625 (19)
1-methyl-4-phenyl-1,2,3,6-tetrahydropyridine		chemical toxicant		0.261	bias	4.45e-05	AIF1,BAX,CASP8,Ccl2,CLDN1,CYBB,EGR1,IDH2,IL1B,ITGAM,JUN,NCF2,NR4A1,OSM,PARK7,SLC40A1,TNFRSF1A,TP53	737 (17)
PITX2		transcription regulator		-0.533		4.69e-05	EGR1,F10,GADD45A,IDH2,MSRA,MYC,NDUFA13,NDUFB3,NDUFB4,NDUFB8,NDUFC1,NDUFC2,NDUFS2,NDUFS3,NDUFS7,NDUFS8,NMRAL1,PRDX2,PYCR2,SDHC,SOD1,TXN2,UQCRQ,VIM,ZEB2	620 (13)
etoposide		chemical drug		0.492	bias	4.7e-05	ATF3,BAX,BCL2A1,BIN1,BIRC5,CCNB1,CD40,CDK4,CDKN1A,CDKN1B,CYCS,DUSP1,EEF1A1,EEF1B2,FAS,GADD45A,H2AFX,ICAM1,IL1B,JUN,MYC,NR4A1,PCNA,PEBP1,RAN,SLC2A3,SQSTM1,TAF6,TK1,TNFRSF1A,TOP2A,TP53,TRADD,UHRF1	697 (21)
SOD1	1.275	enzyme		0.294		4.85e-05	ADORA2B,APEX1,ASS1,ATP1A3,BAX,BID,C5AR1,C5AR2,CD14,CDK4,COMT,DCXR,GPX3,GSTP1,GUK1,HSPA4,HSPA8,ICAM1,IL1B,INHBA,JUN,JUNB,MMP9,MRPS10,Mt1,NFE2L2,P2RX4,P2RX7,P2RY6,PSMB5,PSMB8,RBM3,Rplp1 (includes others),SLC40A1,SOD1,SQSTM1,STIP1,STMN1,Tmsb4x (includes others),TP53,VCAM1	551 (16)
Irgm1		other	Inhibited	-2.514	bias	5.03e-05	AURKB,CCNA2,CCNB1,CCNB2,CDCA3,FAS,IFI16,Ifi27l2a/Ifi27l2b,KIF20A,NUPR1,SQSTM1,TK1,UBE2C
MAPK9		kinase		-1.323	bias	5.15e-05	BAX,Ccl2,CDKN1A,CDKN1B,CDT1,EGR1,EIF4E,FAS,FGL2,GADD45A,GAPDH,HDC,IER2,IFI16,IL1B,JUN,JUNB,LGALS3BP,LMNA,LSM3,METAP2,MIF,MMP9,MYC,NME2,PDIA3,PPP1R15A,RPSA,SLFN12L,TP53	720 (18)
tozasertib		chemical drug		1.253	bias	5.26e-05	AURKA,BAX,CDKN1A,TP53	696 (19)
GNL3L		other		-1	bias	5.26e-05	ADRB2,BAX,CDKN1A,YWHAB	227 (7)
CHFR		enzyme				5.26e-05	AURKA,KIF22,PARP1,PLK1
RNASEH1	0.274	enzyme	Activated	2	bias	5.26e-05	GPAA1,PSMB4,RPS21,RPS3
BO-653		chemical drug		-1.982	bias	5.26e-05	PSMA1,PSMA2,PSMA3,PSMA4
miR-124-3p (and other miRNAs w/seed AAGGCAC)		mature microRNA	Inhibited	-2.392	bias	5.35e-05	ACAA2,ALDH9A1,ARHGEF1,ASPRV1,Ccl2,CDK4,CPNE3,EGR1,ERH,FAM129B,G3BP1,GNG10,GSN,HADH,HADHB,IQGAP1,LITAF,LMNB1,MAD2L2,MAGT1,MMADHC,MYH9,NECAP2,PAPSS2,PDLIM7,PLOD3,PLP2,PTBP1,RHOG,SEC11A,STAT3,STOM,SURF4,SYNGR2,TMBIM1,TMEM109,TUBB6,UHRF1
IFI16	1.427	transcription regulator		0.278	bias	5.37e-05	BAX,CD81,CDKN1A,CDKN1B,CSF3R,GADD45A,GPX1,ICAM1,IFI16,IL1B,IL1RN,MGST1,MIF,Mx1,OAS1,PCNA,SOD1,VCAM1	649 (19)
MDM4		enzyme		-1.843	bias	5.5e-05	BAX,CDKN1A,LGALS3,P4HB,RAC2,SSBP1,TP53,VIM	583 (19)
Cdk		group		-1.525	bias	5.54e-05	ATP5MC1,CDKN1B,COX5A,DUSP1,GADD45A,IDH3A,MYC,NEDD9,SDHA,TXNIP,UCP2	792 (22)
LEP		growth factor		0.252		5.9e-05	ACADL,ACAT1,ADAM8,ASAH1,ASS1,ATP5F1A,ATP5PB,BAX,BCL2A1,BID,BIRC5,CASP6,Ccl2,CCNA2,CD14,CD40,CD63,CD68,CDKN1A,CDKN1B,CYBB,DGAT1,EGR1,ETFDH,FAS,GADD45A,GAPDH,GOT2,GPX1,HSPA5,ICAM1,IDH1,IL1B,IL1R2,IL1RN,ITGAM,JUN,JUNB,LIPA,MAP1LC3B,MYC,NCF1,NCF2,P2RX4,PCNA,PPP1CA,PRDX1,PSMB3,SCARB1,SLC25A5,SLC27A4,SOD1,SORD,STAT3,THBS1,TMED9,TNFRSF1A,TP53,TPRA1,TSPO,UCP2,VCAM1,VIM	671 (18)
thioacetamide		chemical toxicant		1.544	bias	6.05e-05	ANXA1,ANXA4,ARG2,CD14,Cd24a,CD44,CD55,CPQ,CSRP2,EMP1,EMP3,FCGR2A,GATM,GPX3,HAT1,HSPA4,IL1B,JUN,LCN2,LGALS1,LGALS3,LGALS3BP,LXN,MCM3,MCM6,Ms4a6b,MYC,NFE2L2,PROM1,PSMB10,PSMB8,RBM3,RFC4,RGCC,RRM1,S100A10,SCPEP1,STEAP3,TMEM173,Tpm1	582 (14)
EGF		growth factor		1.251	bias	6.16e-05	ATF3,AURKA,AURKB,BIRC5,BTG2,Ccl2,CCNB1,CD44,CDK1,CDK4,CDKN1A,CDKN1B,CEBPD,CEBPE,CXCR4,DAD1,DUSP1,EEF1A1,EGR1,ERCC1,FAM89B,FN1,GADD45A,GPS2,GSTP1,HNRNPK,ICAM1,IDH1,IER2,IL1B,IL1R2,INHBA,ITGAM,JUN,JUNB,KLF10,LCN2,LTF,MAD2L1,MMP9,MYC,NCAM1,NCF1,NR4A1,NRP1,PCNA,PDCD4,PLAUR,PLSCR1,PLXDC1,PPIB,PSMB1,PSMB2,PSMB3,PSMB4,PSMB5,PSMB6,PSMB7,PTTG1,RRM1,S100A10,S100A4,S100A9,THBS1,TP53,TUFM,VASP,VCAM1,VCAN,VIM	597 (17)
epoxomicin		chemical - protease inhibitor		0.011	bias	6.18e-05	H2AFZ,HSPA5,OPTN,PSMA2,PSMA6,PSMB1,PSMB3,PSMB4,PSMB5,SQSTM1	247 (7)
IFNA2		cytokine		1.644	bias	6.27e-05	ALOX5,ANXA1,BAX,BIRC5,CDKN1A,CDKN1B,CEACAM1,CNP,DAD1,DDX60,FAS,HLA-A,HLA-E,IFI16,IFI35,IFITM3,IFNAR2,IL1B,IRF5,LGALS3BP,LY6E,MMP9,MYC,NT5E,OAS1,OAS3,OGFR,PHF11,PLSCR1,PPP1CA,PSME1,PTTG1,RASSF1,SAMHD1,TNFRSF1A,TP53,TREX1,VCAM1,XBP1	554 (17)
cerivastatin		chemical drug		0.793		6.45e-05	ASS1,CD40,CDKN1A,CNP,DBI,FDPS,FN1,GPX1,ICAM1,ITGAL,ITGB2,JUN,MMP9,MYC,PLAUR,S100A8,S100A9,VCAM1	484 (16)
CSF3R	-1.473	transmembrane receptor				6.48e-05	CD14,CDKN1B,CEBPE,CSF3R,FCGR1A,ITGAM,LTF	268 (7)
aphidicolin		chemical toxicant		1.294		6.48e-05	BAX,CCNB1,CDKN1A,GADD45A,Hist1h1b,TK1,TP53	736 (21)
Collagen(s)		complex		0.342		6.52e-05	C3,C3AR1,C5AR1,CD55,CD63,CD68,FN1,ITGAM,LAMP1,PPP1R15A,PSAT1,PXN,THBS1	374 (13)
LGALS3	0.492	other		-1.029		6.62e-05	Ccl2,CCNB2,CCR1,CCR2,CDKN1A,CDKN1B,CTSH,CTSV,DDOST,FN1,ICAM1,IL1B,ITGAM,LAMP1,LMNB1,MGST1,MSR1,MYC,PRKCSH,VCAM1	483 (17)
Histone h3		group				6.67e-05	BIRC5,Ccl2,CCNA2,CCNB1,CD40,CD9,CDK4,CDKN1A,CDKN1B,CEACAM1,CKAP4,CTNNA1,EGR1,GAPDH,HPSE,ICAM1,Ifi27l2a/Ifi27l2b,IFITM3,IL1B,IL6R,JUN,MAD2L1,MCM2,MCM3,MCM5,MGLL,MMP9,MRPS9,Mt1,MTUS1,NCF1,NDUFA12,NDUFA5,NDUFB4,NDUFB6,NDUFC1,NDUFC2,NDUFS2,NDUFS3,NDUFV1,PCNA,POLD4,PROS1,PSMA2,PTCD2,RARA,RASSF1,RGS10,RPL10A,RPL12,RPS6,RPS9,RSL1D1,S100A8,S100A9,SCARB1,SEC31A,STOM,TOP2A,TRIB1,UQCRC1,UQCRC2,WLS,XBP1	708 (20)
ARNT2		transcription regulator	Activated	2.874	bias	7.02e-05	AKR1B1,CCR1,CCS,EGR1,EIF5A,FCGR2A,FKBP3,GPX3,GTF3A,HLA-A,ICAM1,IFI16,IL6R,LCP1,LRRFIP1,LTF,MCM7,MRPL37,NACA,NDUFA1,NUDC,OAZ1,PDLIM4,PEA15,PFN1,PGK1,POLD4,RGS10,Rpl29 (includes others),SELENBP1,SLC2A3,SNX5,Tnfsf9,TSC22D3,TYK2
glutamine		chemical - endogenous mammalian		-0.541		7.62e-05	ASS1,BSG,DUSP1,FABP5,FN1,GADD45A,HSPA1A/HSPA1B,HSPA5,ICAM1,IDH1,JUNB,MYC,NR4A1,OAZ1,PCNA,PHB,PROM1,TIMM17A,TP53,VIM,XBP1	440 (16)
clofibrate		chemical drug		1.908	bias	7.62e-05	ACADL,ANXA7,BAX,BSG,CCNB1,CDK1,CDS2,CEACAM1,ECI1,FAS,GADD45A,GSTP1,HADHA,HADHB,Hmgn2 (includes others),IL1RN,Mt1,MYC,NAP1L1,PDCD4,UCP2	656 (19)
5-O-mycolyl-beta-araf-(1->2)-5-O-mycolyl-alpha-araf-(1->1')-glycerol		chemical - endogenous non-mammalian		-1.746	bias	7.84e-05	ACSL1,ATF3,BCL2A1,CD40,CD44,CX3CR1,CXCR2,DUSP1,EBI3,ICAM1,IL18RAP,IL1B,MGLL,MMP9,NFKBIZ,NT5E,PLA2G7,RND3,VCAM1	416 (11)
NR3C1		ligand-dependent nuclear receptor		-0.844		8.04e-05	ACAT1,ANXA1,ARRB2,BAX,BCKDHA,BCL6,BIN1,BTG1,CAPN2,CASP6,CAT,Ccl2,CDKN1A,CKS1B,COMT,CORO1C,CXCR4,CYP27A1,DAD1,DBI,DGAT2,DNAJC15,DPP7,DUSP1,DUSP22,EGR1,ELMO2,EMP1,FAM89B,FKBP4,FN1,GADD45A,GPR65,GPX1,GPX3,GSTP1,HSD11B1,HSD17B12,HSP90AB1,ICAM1,IDH1,IER2,IL1B,IL36G,INHBA,IRF8,ITGB2,JUN,LMO4,LTB,LYST,MAX,MMP8,MMP9,MSRB1,Mt1,MTCH2,Mx1,MYC,NLRP3,OAT,PDCD4,PEA15,PPP1R15A,PSMA6,PSMG2,PTP4A2,RAF1,SCARB1,SER…	975 (19)
dimethyl sulfoxide		chemical drug		-0.061	bias	8.06e-05	ALOX5,ANXA1,B3GNT8,BIRC5,CALR,CEBPE,EMP3,HEBP1,HSP90AB1,IFI16,IL1B,ITGAM,ITGB2,JUN,LCN2,MYC,NCF1,NUPR1,PBXIP1,PRKX,RAMP1,SGMS2,SQSTM1,Tpm1,VCAM1	599 (16)
SP600125		chemical - kinase inhibitor		0.135		8.06e-05	ACAT2,ALOX5,ATF3,BAX,BTG2,Ccl2,CCNB1,Cd24a,CD44,CDK1,CDKN1A,CDKN1B,Ceacam10,CHST12,CKAP4,COX7A2,DUSP1,EGR1,EIF1AX,EMB,FABP5,FAS,FN1,FUNDC1,GADD45A,H2AFX,HIST1H2BI,HIST2H2AA3/HIST2H2AA4,ICAM1,IL1B,INHBA,JUN,JUNB,MAFB,MMP9,NEDD9,NR4A1,NUPR1,PARP1,PLSCR1,PRDX1,SMPDL3A,THBS1,TP53,VCAM1	636 (16)
GPER1		G-protein coupled receptor		0.718	bias	8.1e-05	ASAH1,ATF3,BAX,CDKN1A,CEBPD,DUSP1,EGR1,HSPA5,IER2,JUN,LTF,MYC,NOP58,PPP1R15A	680 (21)
PDE6B		enzyme				8.12e-05	CAT,GPX1,NFE2L2,RIPK3,SOD1
miR-542-3p (miRNAs w/seed GUGACAG)		mature microRNA	Inhibited	-2.201	bias	8.12e-05	RPL11,RPL22,RPS23,RPS28,TP53
FALEC		other		1	bias	8.12e-05	BTG2,CDKN1A,CYFIP2,ECM1,FAS
CKS1B	0.861	kinase	Activated	2.219	bias	8.12e-05	CCNA2,CCNB1,CDK1,CDKN1B,CKS1B	582 (14)
PLAUR	-1.017	transmembrane receptor		-0.008	bias	8.26e-05	C5AR1,Ccl2,CDK4,CTSB,CYBB,ITGAM,JUN,JUNB,MMP9,MYC,PLAUR,VIM	651 (21)
eflornithine		chemical drug		-0.565		8.26e-05	C3,CDK1,CDKN1A,CDKN1B,FN1,ITGAL,LGALS3,LGALS3BP,MAD2L1,PCNA,PLK1,PSAP	770 (20)
quercetin		chemical drug		0.093		8.45e-05	ACAA2,BAX,BIRC5,Ccl2,CD63,COMT,EGR1,FBL,HPSE,HSPA5,ICAM1,ITGAL,JUN,LCN2,MMP9,MYC,NEDD9,NFE2L2,PLAUR,PON2,PRDX3,PRDX5,SOD1,Tnfsf9,TP53,VCAM1	665 (17)
ARNT		transcription regulator		1.475	bias	8.68e-05	ATP5MC1,ATP5PO,CD81,CDK4,CLDN1,COX6B1,CXCR4,EIF6,ENO1,GAPDH,GPI,KIF20A,NDUFS2,NDUFS3,OAZ1,PGK1,PGM2,RANBP1,RANGAP1,SLC2A3,TP53,TPI1,UBE2C,VIM	770 (15)
S100A6		transporter	Activated	2.53		8.72e-05	ATF3,AURKA,CDK1,CDKN3,CENPA,DHRS9,EXOSC8,INHBA,NCAPH,TMPO	473 (7)
hemozoin		chemical - endogenous non-mammalian		-1.273	bias	8.72e-05	Ccl2,CCR1,CCR2,CXCR2,CXCR4,ICAM1,IL1B,MMP9,S100A8,S100A9	447 (14)
PI3K (complex)		complex		-0.901	bias	8.75e-05	ADIPOR1,ADRB2,ATF3,BIRC5,Ccl2,CCNB1,CCR1,CCT6A,CD44,CD55,CDK4,CDKN1A,CDKN1B,CXCR4,CYBB,DUSP1,FABP5,FN1,GSTP1,ICAM1,IL1B,IL1RN,ITGAM,ITGB2,JUN,LASP1,LCN2,MMP9,MYC,NFE2L2,NME1,OSTF1,PDCD4,PRDX2,RND3,RPL23,SAMHD1,SOAT1,STMN1,THBS1,TP53,TREM1,TXNIP,VCAM1,XBP1	372 (15)
SLC29A1		transporter		0.113	bias	8.8e-05	BAX,CDKN1A,FAS,GADD45A,RPL10A,RPL3,RPS27L,SESN1	241 (7)
LDLR		transporter		0.442		8.88e-05	APOBEC1,Ccl2,CCR2,CD40,CD68,CYP27A1,EGR1,HSPA5,ICAM1,IL1B,LCN2,MMP9,MSR1,MYC,PSMA7,PSMB7,PSMB9,PSMC6,PSME2,SCARB1,VCAM1	491 (18)
bexarotene		chemical drug	Activated	2.243	bias	8.93e-05	ADRB2,ARL6IP5,Ccl2,CHCHD2,Cox5b,COX6A1,COX8A,CTSH,CYCS,DCTN3,DHRS3,DUSP1,FKBP2,GARS,GUK1,ICAM1,IER2,IL1B,KLF10,LSM4,MALAT1,MMP9,MRPL54,NDUFB2,NDUFB8,PLAUR,PTPRO,RABAC1,S100A9,TPGS1,TSC22D3,VCAM1,XBP1	936 (22)
E2F3		transcription regulator	Activated	2.154	bias	9.11e-05	AKNA,BIRC5,CCNA2,CCNB1,CCNB2,CD9,CDCA3,CDCA4,CDK1,CDKN1A,ECE1,HIST1H1C,HSPD1,INHBA,MAD2L1,MALAT1,MCM2,MCM3,MCM5,MCM6,MCM7,MYC,PCNA,PLK1,PTTG1,RRM1,S100A8,THBS1,TK1,TMPO,UBE2C	753 (21)
PPP3CA		phosphatase		0	bias	9.22e-05	C3,CD82,CD9,CDK4,CDKN1A,CDKN1B,CTSV,FN1,FTL,GRN,GSTP1,LITAF,MAGT1,MGST1,PRDX5,PSAP,S100A4,VIM	553 (20)
SRC		kinase	Activated	2.041	bias	9.28e-05	ACAT1,CDK1,CDKN1A,CTSB,CTSV,DUSP1,ENO1,FGR,FN1,ICAM1,JUN,LAMP1,MMP9,MYC,PGK1,PLAUR,PLK1,RETSAT,SIRPA,STAT3,SUMO1,VCAM1,VIM	740 (19)
SAFB2		other		-0.333		9.33e-05	BCCIP,EIF4B,HEXA,HLA-E,JUN,PSMB9,RPL35A,UBE2B,UQCRC2
SREBF1		transcription regulator	Activated	2.794	bias	9.49e-05	ACSL1,ARF4,ATOX1,BAX,C5AR1,CD14,CDK4,CDKN1A,CEBPD,CYCS,CYP4F2,DBI,ETHE1,FABP5,FAS,FDPS,FN1,GPX3,HSPA1A/HSPA1B,HSPA5,IDH1,IFI30,IL1B,IL1R2,IMMT,INSIG1,LGALS3,MVD,NCF2,NUPR1,OAT,RPLP0,RPS24,SCARB1,SQLE,SUCLG1,TMEM97,TP53,UCP2,UQCRFS1	840 (20)
cycloheximide		chemical reagent		-0.742		9.79e-05	ASS1,BAX,BTG2,CALR,CAT,CCR1,CD44,CD55,CDK4,CDKN1A,CDKN1B,CDKN2D,CEBPD,CXCR4,DUSP1,EEF1A1,EEF1D,EGR1,FAS,FN1,GADD45A,GAS7,HEXA,HSD11B1,ICAM1,IL1B,IL1R2,IL1RN,ITGAM,JUN,JUNB,KDM6B,LCN2,Mt1,MXD1,MYC,NFE2L2,NPM1,NR4A1,OSM,PGK1,PLAUR,PLK1,PXN,RBM3,S100A8,SCARB1,SIVA1,SNRNP70,SRSF7,THBS1,TK1,TP53,VCAM1	445 (15)
FMR1		translation regulator	Inhibited	-2.704	bias	0.000102	ATP5IF1,ATP5MG,CFL1,EEF2,EIF1AX,ENO1,FXR1,GAPDH,MMP9,PFN1,PPIA,RPSA,UQCRFS1,UQCRQ	283 (7)
calphostin C		chemical - kinase inhibitor	Inhibited	-2.437	bias	0.000102	BIRC5,CDKN1A,DUSP1,ECE1,FN1,HSP90B1,HSPA5,ICAM1,MMP9,MSR1,MYC,P4HB,PDIA4,S100A8,SCARB1,TP53	491 (16)
ATF3	0.711	transcription regulator		-0.811		0.000107	ADIPOR1,ATF3,AURKA,AURKB,CD82,CDK1,CDK4,CDKN1A,GSN,HSPA5,ICAM1,IL1B,ITGA1,JUN,PLK1,PPP1R15A,SRI,STAT3,TP53,XBP1	655 (19)
PRKAA		group		-0.752		0.000108	BAX,BIRC5,Ccl2,CDKN1A,CLDN1,DUSP1,HSD11B1,NCF1,NCF2,TP53,VIM,XPC	684 (22)
CCL2		cytokine		-0.234	bias	0.000109	BIRC5,Ccl2,CCR2,CD40,CEBPD,HDC,ICAM1,IL1B,INHBA,ITGA1,ITGAL,LAMP1,LCN2,MMP9,NCF1,PCNA,SCARB1,SLC40A1,VCAM1	471 (15)
FADD		other		1.213	bias	0.000109	Ccl2,CDK1,CDKN1A,CDKN1B,CXCR4,EGR1,FAS,ICAM1,IRF5,JUN,JUNB,LY6E,MAP3K1,MMP9,Mx1,MYC,PPP1R15A,PSMB8,TRAFD1	700 (17)
MAP2K1/2		group		0.202	bias	0.00011	ARG2,ATF3,C3,Ccl2,CDK1,CDKN1B,DUSP1,EGR1,H2AFX,HSPA5,IL1B,JUN,MMP9,MYC,PCNA,RRM1,SCARB1,VIM	460 (16)
Insulin		group	Activated	2.336		0.00012	ACAT1,ACSL1,ADIPOR1,ARG2,ATF3,Atp5e,ATP5MC2,BIRC5,BSCL2,Ccl2,CDKN1A,CDKN1B,CYBB,DBI,DUSP1,EGR1,FN1,FTL,GSTP1,HNRNPK,HPSE,HSD11B1,HSP90B1,HSPA5,ICAM1,INSIG1,JUN,LGALS3BP,MCM6,MCM7,MMP9,MTCH2,MYC,NCF1,NDUFA1,NDUFB9,NR4A1,OGT,Orm1 (includes others),PGK1,PPP1R15A,RETSAT,Rpl32,RPS16,RPS6,SCARB1,SLC25A5,SLC2A3,SOD1,SQLE,SRSF3,STAT3,TGFBI,UCP2,UQCRC2,XBP1	825 (20)
H2AFZ	0.725	other				0.000121	AGPAT2,CDKN1A,CXCR4,GINS2,HPSE,MCM2,MCM7,RFC4,RPS6,TOMM40	181 (7)
ATP-gamma-S		chemical reagent				0.000124	BTG1,C3,CCR1,CD300E,CD40,CD55,CXCR4,IL16,IL1R2,MMP9,MPEG1,NCF2,NRP1,PRDX2,THBS1,TRAP1	553 (18)
sodium arsenite		chemical drug		1.241		0.000126	AHCY,BAX,BIRC5,CDKN1A,CDKN1B,EGR1,GADD45A,HSPA4,JUN,LITAF,MAT2A,RAF1,SRSF3,TP53	488 (17)
methamphetamine		chemical drug		0.099		0.000128	BAX,BID,Ccl2,EGR1,FAS,ICAM1,IL1B,JUN,LGALS1,MMP9,MYC,NDUFB8,NR4A1,SIGMAR1,TNFRSF1A,UQCRC2,VCAM1	459 (17)
benzo(a)pyrene		chemical toxicant		0.102	bias	0.000134	ANXA1,ARHGDIA,ARL6IP5,BAX,BIRC5,CDK2AP2,CDKN1A,CKS1B,COMT,DDB1,ESD,GSTP1,HP,HSPA1A/HSPA1B,IL1B,INHBA,JUN,LCP1,MAD2L1,MAFG,Mx1,NR4A1,PCNA,PDLIM1,PGD,PPIF,RAE1,SELENBP1,SQSTM1,TAF6,THBS1,TKT,TM2D2,TP53,TSPAN31,XPC	717 (20)
E2F5		transcription regulator				0.000135	AURKB,BAX,CASP6,CDK1,CDKN1A,MYC,PA2G4,PCNA,RANBP1
PTPN6	-0.255	phosphatase		0.589	bias	0.000135	BAX,Ccl2,CD44,CDK4,CDKN1B,CYBB,FN1,IL1B,ITGB2,MYC,NCF2,STAT3,VIM	618 (20)
11,12-epoxyeicosatrienoic acid		chemical - endogenous mammalian		-0.381		0.000136	CD44,CD82,CDKN1B,DUSP1,ICAM1,MMP9,NME1,VCAM1	725 (21)
ERVW-1		other		0.4	bias	0.000136	CCNA2,CDCA8,CDKN1A,CNP,HSPA5,MCM2,TP53,XBP1	460 (7)
CYP2E1		enzyme		-0.87	bias	0.000136	C3AR1,C5AR1,CAT,Ccl2,CD14,MGST1,NCF1,NCF2	479 (18)
SENP1		peptidase		1.709	bias	0.000136	ATP5MC1,Ccl9,Cox5b,CYCS,IDH3A,MMP9,SUMO1,UCP2	492 (20)
simvastatin		chemical drug		0.98		0.000139	ADRB2,ANXA1,ANXA3,ARHGDIA,BAX,BIRC5,C5AR1,CD14,CD40,CD55,CD81,CD9,CDKN1A,CDKN1B,CYBB,HIST1H1C,ICAM1,IL1B,ITGAL,ITGB2,LCN2,Ly6a (includes others),MAP1LC3B,MMP9,MYC,NCF1,NCF2,NONO,PGLYRP1,RAF1,SCARB1,SOAT1,Tpm1,VCAM1,VIM	427 (18)
hydroxyurea		chemical drug		1.197	bias	0.00014	BAX,CCNB1,CDKN1A,CDKN1B,GADD45A,GINS2,GMNN,GPX1,H2AFX,MCM2,MCM5,MYC,TK1,TP53,UHRF1	710 (19)
PRDM1		transcription regulator		0.193		0.000141	ADAM8,ARG2,BCL2A1,BCL6,Ccl2,CD44,CD74,CFH,CLDN1,CLTA,CRISPLD2,CXCR4,ECM1,F5,FGR,HAL,HIST2H2AA3/HIST2H2AA4,HLA-DQA1,Ifi202b,IL18RAP,IL1B,IRF8,LGALS1,MAFB,MMP25,MYC,NLRP12,NLRP3,PLAC8,PSMB10,PSMB8,S100A8,S100A9,TNFRSF13B,TNFSF13B,TRIB1,XBP1	474 (16)
paclitaxel		chemical drug		0.301		0.000141	ADORA2B,ANXA5,ATF3,BAX,BIRC5,BTG2,CD40,CD44,CDC20,CDKN1A,CYP4F2,EGR1,EMP1,FAS,G0S2,GRINA,H2AFX,HDAC3,HLA-A,HPSE,HSP90AB1,ICAM1,IER2,IL1B,JUN,KDM6B,KIF20A,LCP1,MAP3K1,MMP9,MYC,PCNA,PHGDH,PLAUR,RAC2,RAF1,RBM3,S100A9,SLC2A3,STAT3,STMN1,THBS1,TP53,TUBA1B,UHRF1	693 (21)
Igm		complex		0.587		0.000149	BCL2A1,BIRC5,CCNA2,CD40,CD44,CDKN1A,CDKN1B,CYCS,EGR1,FAS,MYC,PDCD4,TNFRSF13B,TNFRSF14,TP53,XBP1	443 (20)
PTTG1	0.646	transcription regulator		0.342		0.000153	APEX1,CCNA2,CCNB1,CD44,CDKN1A,CDKN2D,ERCC1,FEN1,MIF,MYC,PARP2,SUMO1,TP53,TREX1,UBE2B,VIM,XRN2	727 (21)
SPP1	1.167	cytokine		1.932	bias	0.000154	AURKA,BAX,CASP8,Ccl2,CCS,CD44,CD9,CDC20,CDKN1A,COX7A2L,FN1,HMOX2,ICAM1,IL1B,INSIG1,MMP9,MTA2,MYC,NDUFA9,NDUFB9,NDUFS7,NDUFS8,NDUFV1,PGD,RAF1,S100A4,SAMM50,SSB,TP53,UQCRC2,VIM	710 (19)
PRKAG3		other				0.000158	ATP6V1A,BTG2,CD55,CTNNA1,CYP27A1,EGR1,EIF4B,EIF4E2,FTL,GLRX,GPX3,HIST2H2AA3/HIST2H2AA4,HSPA5,IFI30,JUNB,MAT2A,MID1IP1,NAP1L1,RAMP1,RGCC,RPL12,RPL13A,RPL22,RPL5,Rps3a1,SLC2A3,SLC40A1,SORD,ZEB2
acetaminophen		chemical drug		1.168		0.000171	ACTG1,APEX1,BCKDHA,BTG2,CASP8,CAT,Ccl2,CCR1,CCR2,CDKN1A,CTSV,FAS,GADD45A,GLUD1,GPX1,GSTP1,HSD17B4,HSPA5,HSPD1,ICAM1,IFRD1,IL1B,JUN,Mt1,MYC,PCNA,PLAUR,PRDX1,TUBA1A,TUBB,VCAM1	699 (17)
topotecan		chemical drug		0.679		0.000171	ACSL1,ARL6IP1,ATF3,AURKA,BTG1,C3,CCNB1,CCR2,CDKN1A,EGR1,ENO1,FAS,GPX1,HLA-DQA1,HLA-E,HNRNPK,HSPA1A/HSPA1B,HSPA8,HSPD1,JUNB,MAT2A,MGST2,MYC,PLK1,PNP,SIVA1,SRSF3,TOP2A,TP53,TRAP1,UBE2B	719 (23)
STAT4	-0.274	transcription regulator		1.788	bias	0.000176	ACADL,ACAP1,AHNAK,AP2A2,BSG,C3,CDKN1B,COPG1,DPM3,H3F3A/H3F3B,HEXB,HIST2H2AA3/HIST2H2AA4,HLA-DQB1,Ifi202b,IL18RAP,KDELR2,KDM6B,LRRFIP1,MAP3K1,Ms4a4b (includes others),Mt1,MTHFS,Mx1,MYC,PLAC8,POLD4,PYGL,RAMP1,RASSF1,RGCC,S100A4,SELENBP1,SERPINB1,SLC2A3,SMPDL3A,VDAC1	421 (15)
D-galactosamine		chemical - endogenous mammalian		1.633	bias	0.000178	BAX,CASP8,CD14,CTSB,EDNRA,ICAM1,JUN,JUNB,MYC,NFE2L2,TNFRSF1A,TRADD	514 (17)
ouabain		chemical drug		1.362	bias	0.000178	ANXA5,ATP1A3,CDKN1A,HSPA5,HSPA8,HSPA9,PCNA,PHB,TP53,VIM,YWHAH,YWHAQ	472 (17)
GC-GCR dimer		complex	Inhibited	-2.621	bias	0.000185	ADRB2,ANXA1,DUSP1,IL1R2,IL1RN,SLPI,TSC22D3
CREB3		transcription regulator		0.864		0.000185	ANXA1,CANX,FKBP4,HSPA5,INSIG1,MMP9,XBP1
3-aminobenzamide		chemical toxicant		-1.118	bias	0.000185	CDKN1A,ICAM1,IL1B,ITGAL,PARP1,PCNA,TP53	496 (19)
formoterol		chemical drug		0.618	bias	0.000185	CALR,CXCR2,EBI3,MMP9,PSMA3,PSMA4,UBE2B
phytohemagglutinin		chemical drug		1.874	bias	0.000192	ADH5,AIF1,ALDH2,BTG1,CAT,CCR2,CD3D,CD44,CDK4,COX7B,CXCR4,EIF5A,FAS,FGR,GYS1,HINT1,HSP90AA1,ICAM1,IDH3A,IL1B,IL1R2,KIF23,LAMP1,LMAN1,MMP9,NCAM1,NEDD8,NME1,NOP56,NT5E,PCNA,PDHB,PLK1,PON2,PRKX,PRPS1,PSMA1,RPA1,RPS16,SARS,SCARB2,STAT3,TMPO,VPS41,XBP1	444 (18)
NFYB		transcription regulator				0.000193	ATP5F1B,CCNB1,CCNB2,CDCA8,CDK1,CDS2,CLDN15,CSDE1,EIF3C,EMC6,FAS,GADD45A,GAPDH,HLA-DQB1,ITM2C,METTL9,MSRA,NOSIP,OAT,PCNA,PDIA4,PLK1,PSMB7,PSMC6,PTTG1,RFC3,RNPS1,RPL41,S100A4,SCARB1,SERBP1,SESN1,TAX1BP3,TBC1D22A,TMBIM6,TOP2A,TSNAX,TXNDC12,UHRF1,VIM,ZMPSTE24
PRKAA1		kinase		1.386		0.000197	ACOT7,ARHGDIB,ATF3,BAX,BIRC5,BTG1,CAT,CD302,CDKN1A,CDKN1B,COX4I1,FN1,GPX1,LITAF,LMO4,Ly6a (includes others),MGST1,MMP9,NCF1,NCF2,OAT,PSMB8,RND3,SORL1,TP53,VCAM1	507 (19)
TICAM1		other		0.045	bias	0.000197	ACSL1,Ccl2,CCRL2,CD40,CEBPD,CFB,DUSP1,EGR1,FAS,FPR1,FPR2,ICAM1,IFI16,Ifi47,IL18BP,IL1B,MCM2,Ms4a4b (includes others),Mx1,NFKBIZ,PILRA,SAMHD1,TFEC,Tnfsf9,TREM1,VCAM1	371 (15)
CYP2J2		enzyme		-0.744		0.000203	Ccl2,CD44,CD82,ICAM1,IL1B,MMP9,NME1,VCAM1	402 (13)
linalool		chemical - endogenous non-mammalian				0.000203	ACSL1,ECHS1,HSD3B7,SLC27A4,SOD1,SQLE,STAT3,UCP2
NCOR1		transcription regulator		-1.724	bias	0.000204	CCNA2,CD82,CDKN1A,CDKN1B,CEBPE,COX8A,CSF3R,DBI,DDT,DUSP1,HP,IL1B,MMP9,MRPS18B,MTA2,NDUFV1,RARA,SORD,UQCRQ	704 (22)
Il3		cytokine		0.813		0.000215	CD14,CD68,CDKN1A,CDKN1B,CSF3R,EGR1,FAS,ITGAM,LCN2,LTF,Ly6a (includes others),MYC,OSM,SNAP23,TCP1,TNFRSF1A,TP53	539 (18)
cigarette smoke		chemical toxicant		0.759	bias	0.000216	BIRC5,C3,CAT,Ccl2,CCT5,CDKN1A,CLEC5A,EGR1,ESD,FABP5,FTL,Gm21596/Hmgb1,GPX3,GSTP1,HSP90AA1,HSPA5,HSPA9,ICAM1,IL1B,JUN,MAP1LC3B,MAP3K1,MMP9,NFE2L2,OAS1,OAS3,P2RX4,P2RX7,P2RY6,PGD,PRDX1,PSMD1,SQSTM1,TCP1,Tmsb4x (includes others),TNFRSF1A,TP53,TREM2,XBP1	598 (17)
IGF2		growth factor	Activated	2.169		0.000218	ARHGDIA,BIRC5,CASP6,Ccl2,CDK1,CDKN1A,CTSV,CXCR4,DUSP1,EGR1,FEN1,FN1,GADD45A,GRN,IDH1,IER2,Ifi202b,JUNB,MCM2,MCM5,MCM7,MYC,PDCD4,RRM1,TGFBI,TOMM40,TP53,UHRF1,ZNRD1	623 (23)
ADIPOQ		other		-0.604		0.000218	ACSL1,ADIPOR1,BIRC5,CASP6,Ccl2,CDKN1A,CDKN1B,CLEC10A,CYBB,DGAT1,DUSP1,EGR1,FN1,ICAM1,Klrk1,MSR1,NCF1,NCF2,PCNA,PDCD4,PDHB,PRDX3,PRDX5,SLC2A3,SOAT1,STAT3,TP53,UCP2,VCAM1	599 (21)
deferasirox		chemical drug		0.765	bias	0.000221	ANKRD22,F13A1,GAS7,ITGAM,ITGB2,JUN,LY75,MS4A6A,PLD4,SULF2
CLCA2		ion channel		-0.294		0.000224	CASP8,CDKN1A,CDKN1B,FN1,TP53,VIM
BAP1		peptidase		-1.179	bias	0.000224	ATF3,Ccl2,CDKN1B,HSPA5,MCM3,XBP1
CACNA1A		ion channel				0.000224	BTG1,Ccl2,CD68,GRN,IL1B,ITGAM
SR 144528		chemical reagent		1.664	bias	0.000224	CCR1,CCR2,EGR1,ICAM1,IL1B,IL1RN	323 (11)
methyl methanesulfonate		chemical toxicant		0.326	bias	0.000226	ATF3,BTG1,BTG2,CDKN1A,EGR1,GADD45A,HPRT1,JUN,PLXNB2,TP53,VIM,XPC	833 (21)
NSD2		enzyme				0.000231	BAX,BTG2,CXCR4,ERCC1,GADD45A,HAT1,ITGB7,JUN,Mx1,OAS1,STAT3
SOX4		transcription regulator		1.58	bias	0.000231	Akr1c12/Akr1c13,ALDH1B1,B3GNT8,BAX,BIRC5,CAPN2,Ccl9,CD74,CTNNA1,EMB,EMP1,EVI2A,FFAR2,FN1,GPR183,HLA-DQB1,IFI30,Ly6a (includes others),MGST2,Mt1,NCAM1,PNP,PYGL,RNASE4,RNF144A,S100a11,TAX1BP3,TMEM176B,Tmsb4x (includes others),TUBA1A,VIM
CUX1		transcription regulator		1.3		0.000235	ARHGDIB,CCNA2,CDKN1A,CDKN1B,CEBPE,CYBB,ITGB2,LTF,MMP8,MYC,NCAM1,RACGAP1,THBS1,VIM	437 (7)
MITF		transcription regulator	Activated	3.275	bias	0.000239	ACO2,ACSL1,ASAH1,ATP6V1B2,ATP6V1C1,AURKB,CCNB1,CD44,CDCA3,CDCA8,CDT1,CENPM,FN1,GM2A,HMBS,IL6R,IVNS1ABP,KIF20A,LGALS3,LYST,MCM2,MCM5,MCM6,MDH1,NPM3,PLK1,QDPR,RAB27A,RFC5,SCARB1,SOX13,STX7,TACC3,TNFRSF14,TP53,TXNIP,UBE2C	672 (19)
[truncated: 1,498 more rows]

## Sheet: C4 vs C0,1,3,5
Supplementary Table 7c: Ingenuity Upstream Modulator analysis of Cluster 4 macrophages compared to Cluster 0, 1 and 3 Macrophages
[truncated: 2,472 more rows]

## Sheet: C4 vs All
Supplementary Table 7d: Ingenuity Upstream Modulator Analysis of Cluster 4 Macrophages compared to all non-cluster 4 Macrophages
[truncated: 2,807 more rows]

[truncated: 1 more sheets: C2,4 vs C0,1,3,5]
