# Supplementary material for: Performativity and National Identity: Japan’s Domestic Policies
Source: Oxford University Press journal article supplement (doi:10.1158/2159-8290.cd-18-1393), 2007-01-01
Supplement: 21598290cd181393-sup-212867_2_supp_5481634_pqqjqy.xlsx [file 21598290cd181393-sup-212867_2_supp_5481634_pqqjqy.xlsx]

## Sheet: 20954 A vs V
Supplementary Table 4a: GSEA comparing bone marrow macrophages from DFBL-20954 bearing mice treated with Alemtuzumab (A) or PBS (V). Positive enrichment scores indicate gene sets expressed higher in Alem as compared to PBS determined by the ordering of the rank ordered differential expression lists.
pathway	pval	padj	ES	NES	nMoreExtreme	size
GNF2_TAL1	0.00160514	0.0323518	0.823955	3.12514	0	58
GNF2_SPTB	0.00160514	0.0323518	0.819375	3.10055	0	57
GNF2_ANK1	0.00160514	0.0323518	0.819375	3.10055	0	57
HALLMARK_HEME_METABOLISM	0.00142653	0.0323518	0.676869	3.05145	0	162
GNF2_SPTA1	0.00158983	0.0323518	0.785097	3.02666	0	62
GNF2_MAP2K3	0.00161812	0.0323518	0.784047	2.9968	0	61
GSE2405_0H_VS_24H_A_PHAGOCYTOPHILUM_STIM_NEUTROPHIL_UP	0.00138504	0.0323518	0.649263	2.97324	0	183
GNF2_BNIP3L	0.0016129	0.0323518	0.784492	2.96818	0	55
REACTOME_PEPTIDE_CHAIN_ELONGATION	0.00154083	0.0323518	0.728146	2.9633	0	81
GO_RIBOSOMAL_SUBUNIT	0.00145985	0.0323518	0.667635	2.94702	0	146
GNF2_RAD23A	0.0016129	0.0323518	0.777652	2.9423	0	55
KEGG_RIBOSOME	0.00155763	0.0323518	0.723261	2.9375	0	83
GO_STRUCTURAL_CONSTITUENT_OF_RIBOSOME	0.00138696	0.0323518	0.639309	2.92433	0	180
GNF2_CDC27	0.00164204	0.0323518	0.778206	2.91602	0	51
GO_CYTOSOLIC_RIBOSOME	0.0015361	0.0323518	0.698164	2.9028	0	97
MODULE_114	0.00132802	0.0323518	0.600172	2.8787	0	297
REACTOME_3_UTR_MEDIATED_TRANSLATIONAL_REGULATION	0.00151286	0.0323518	0.681782	2.85298	0	99
MODULE_151	0.001321	0.0323518	0.592337	2.84069	0	278
MODULE_83	0.00132802	0.0323518	0.58985	2.82919	0	297
GNF2_PRDX2	0.00167504	0.0323518	0.882007	2.81512	0	25
REACTOME_SRP_DEPENDENT_COTRANSLATIONAL_PROTEIN_TARGETING_TO_MEMBRANE	0.0015456	0.0323518	0.669045	2.80693	0	103
MORF_TPT1	0.00151286	0.0323518	0.670646	2.80638	0	99
REACTOME_INFLUENZA_VIRAL_RNA_TRANSCRIPTION_AND_REPLICATION	0.0015361	0.0323518	0.673551	2.80046	0	97
MORF_ACTG1	0.00148588	0.0323518	0.642153	2.79204	0	135
MORF_NPM1	0.001443	0.0323518	0.62054	2.77639	0	158
REACTOME_RESPIRATORY_ELECTRON_TRANSPORT_ATP_SYNTHESIS_BY_CHEMIOSMOTIC_COUPLING_AND_HEAT_PRODUCTION_BY_UNCOUPLING_PROTEINS_	0.00158983	0.0323518	0.696248	2.774	0	75
MODULE_62	0.00155763	0.0323518	0.675395	2.74345	0	84
GO_ESTABLISHMENT_OF_PROTEIN_LOCALIZATION_TO_ENDOPLASMIC_RETICULUM	0.00153846	0.0323518	0.656972	2.73598	0	98
GNF2_EIF3S6	0.00151976	0.0323518	0.640352	2.73012	0	116
KEGG_OXIDATIVE_PHOSPHORYLATION	0.00152905	0.0323518	0.652615	2.728	0	100
GO_RIBOSOME	0.00142248	0.0323518	0.594276	2.72261	0	198
MORF_NME2	0.00146628	0.0323518	0.611732	2.70328	0	147
GO_LARGE_RIBOSOMAL_SUBUNIT	0.0015528	0.0323518	0.66411	2.70288	0	85
MOOTHA_VOXPHOS	0.00154083	0.0323518	0.664006	2.70227	0	81
GO_INNER_MITOCHONDRIAL_MEMBRANE_PROTEIN_COMPLEX	0.00154083	0.0323518	0.65534	2.70109	0	92
GSE2405_0H_VS_9H_A_PHAGOCYTOPHILUM_STIM_NEUTROPHIL_DN	0.00139665	0.0323518	0.589517	2.69009	0	179
REACTOME_TRANSLATION	0.00146628	0.0323518	0.612238	2.67561	0	138
REACTOME_NONSENSE_MEDIATED_DECAY_ENHANCED_BY_THE_EXON_JUNCTION_COMPLEX	0.00153139	0.0323518	0.638006	2.67547	0	102
KEGG_PARKINSONS_DISEASE	0.00152905	0.0323518	0.633426	2.64779	0	100
GNF2_PCAF	0.00167504	0.0323518	0.825819	2.63579	0	25
REACTOME_RESPIRATORY_ELECTRON_TRANSPORT	0.00158983	0.0323518	0.682626	2.63162	0	62
GO_CYTOSOLIC_LARGE_RIBOSOMAL_SUBUNIT	0.00165563	0.0323518	0.701837	2.63	0	54
GO_ELECTRON_TRANSPORT_CHAIN	0.00156006	0.0323518	0.647845	2.62842	0	82
GNF2_TPT1	0.00165837	0.0323518	0.74443	2.62755	0	37
GCM_TPT1	0.0015949	0.0323518	0.67149	2.62626	0	67
GO_OXIDATIVE_PHOSPHORYLATION	0.0015625	0.0323518	0.653462	2.61891	0	76
GO_NUCLEAR_TRANSCRIBED_MRNA_CATABOLIC_PROCESS_NONSENSE_MEDIATED_DECAY	0.00152439	0.0323518	0.613834	2.60458	0	112
GO_PROTEIN_LOCALIZATION_TO_ENDOPLASMIC_RETICULUM	0.00152439	0.0323518	0.611367	2.59556	0	113
MODULE_22	0.00161551	0.0323518	0.713485	2.59461	0	42
GO_RESPIRATORY_CHAIN	0.00157729	0.0323518	0.653857	2.58491	0	72
MODULE_152	0.00152439	0.0323518	0.607017	2.57565	0	112
GO_NADH_DEHYDROGENASE_COMPLEX	0.00163934	0.0323518	0.715212	2.57447	0	41
GO_SMALL_RIBOSOMAL_SUBUNIT	0.00161812	0.0323518	0.673119	2.57281	0	61
GO_CYTOSOLIC_SMALL_RIBOSOMAL_SUBUNIT	0.00166113	0.0323518	0.721538	2.55596	0	38
WELCH_GATA1_TARGETS	0.00176678	0.0323518	0.860421	2.55562	0	19
REACTOME_FORMATION_OF_THE_TERNARY_COMPLEX_AND_SUBSEQUENTLY_THE_43S_COMPLEX	0.00160256	0.0323518	0.693807	2.53705	0	44
GO_TRANSLATIONAL_INITIATION	0.00148588	0.0323518	0.583226	2.53583	0	135
GSE26030_TH1_VS_TH17_RESTIMULATED_DAY5_POST_POLARIZATION_UP	0.00143885	0.0323518	0.565523	2.53253	0	157
GSE14000_TRANSLATED_RNA_VS_MRNA_4H_LPS_DC_DN	0.00151976	0.0323518	0.593902	2.53208	0	116
GO_MITOCHONDRIAL_ELECTRON_TRANSPORT_NADH_TO_UBIQUINONE	0.00167224	0.0323518	0.708594	2.53197	0	40
REACTOME_TCA_CYCLE_AND_RESPIRATORY_ELECTRON_TRANSPORT	0.0015456	0.0323518	0.599604	2.53188	0	107
YAO_TEMPORAL_RESPONSE_TO_PROGESTERONE_CLUSTER_17	0.00141844	0.0323518	0.560907	2.53039	0	164
GSE34205_RSV_VS_FLU_INF_INFANT_PBMC_UP	0.0015528	0.0323518	0.62275	2.51702	0	79
GO_NADH_DEHYDROGENASE_ACTIVITY	0.00165289	0.0323518	0.714774	2.51287	0	36
GNF2_GLTSCR2	0.00166389	0.0323518	0.743849	2.5105	0	31
GO_MITOCHONDRIAL_PROTEIN_COMPLEX	0.00151515	0.0323518	0.585743	2.50858	0	120
PECE_MAMMARY_STEM_CELL_UP	0.0015456	0.0323518	0.597674	2.5075	0	103
MORF_RAN	0.0013587	0.0323518	0.526714	2.49755	0	257
REACTOME_REGULATION_OF_ORNITHINE_DECARBOXYLASE_ODC	0.00162866	0.0323518	0.677788	2.49705	0	46
GSE14000_TRANSLATED_RNA_VS_MRNA_DC_DN	0.0015083	0.0323518	0.578046	2.49114	0	126
GO_CYTOSOLIC_PART	0.00143062	0.0323518	0.552303	2.49078	0	169
MODULE_29	0.00163666	0.0323518	0.75519	2.48689	0	27
REACTOME_ACTIVATION_OF_THE_MRNA_UPON_BINDING_OF_THE_CAP_BINDING_COMPLEX_AND_EIFS_AND_SUBSEQUENT_BINDING_TO_43S	0.00162602	0.0323518	0.66028	2.48405	0	52
GO_PORPHYRIN_CONTAINING_COMPOUND_METABOLIC_PROCESS	0.00167224	0.0323518	0.745094	2.46304	0	28
KEGG_PORPHYRIN_AND_CHLOROPHYLL_METABOLISM	0.00166389	0.0323518	0.760672	2.46276	0	26
GO_MITOCHONDRIAL_MEMBRANE_PART	0.00147929	0.0323518	0.561035	2.46213	0	142
KEGG_PROTEASOME	0.00163934	0.0323518	0.683118	2.45895	0	41
GO_ORGANELLAR_RIBOSOME	0.00160256	0.0323518	0.630935	2.45361	0	66
GO_PROTEIN_TARGETING_TO_MEMBRANE	0.00148588	0.0323518	0.562426	2.44606	0	136
GO_OXIDOREDUCTASE_ACTIVITY_ACTING_ON_NAD_P_H_QUINONE_OR_SIMILAR_COMPOUND_AS_ACCEPTOR	0.00160256	0.0323518	0.668151	2.44323	0	44
GSE3039_CD4_TCELL_VS_B1_BCELL_DN	0.00149031	0.0323518	0.561487	2.43666	0	131
GO_REGULATION_OF_CELLULAR_AMINO_ACID_METABOLIC_PROCESS	0.0016129	0.0323518	0.642881	2.43239	0	55
GO_TRANSLATIONAL_TERMINATION	0.0015456	0.0323518	0.592288	2.42852	0	90
CHYLA_CBFA2T3_TARGETS_DN	0.00151745	0.0323518	0.564255	2.42423	0	124
REACTOME_METABOLISM_OF_MRNA	0.00141844	0.0323518	0.526786	2.41974	0	200
HSIAO_HOUSEKEEPING_GENES	0.00126263	0.0323518	0.49236	2.41938	0	355
YAO_TEMPORAL_RESPONSE_TO_PROGESTERONE_CLUSTER_13	0.00145349	0.0323518	0.541327	2.41544	0	155
CHNG_MULTIPLE_MYELOMA_HYPERPLOID_UP	0.00165017	0.0323518	0.651122	2.41315	0	49
KEGG_HUNTINGTONS_DISEASE	0.00147929	0.0323518	0.549527	2.41163	0	142
GO_PROTEASOME_CORE_COMPLEX	0.00179211	0.0323518	0.828314	2.40244	0	18
BILANGES_RAPAMYCIN_SENSITIVE_VIA_TSC1_AND_TSC2	0.00161812	0.0323518	0.623119	2.3817	0	61
GO_ANTIGEN_PROCESSING_AND_PRESENTATION_OF_EXOGENOUS_PEPTIDE_ANTIGEN_VIA_MHC_CLASS_I	0.00165563	0.0323518	0.635259	2.38051	0	54
MODULE_91	0.00165289	0.0323518	0.675986	2.37651	0	36
REACTOME_VIF_MEDIATED_DEGRADATION_OF_APOBEC3G	0.00165563	0.0323518	0.642801	2.37235	0	47
GSE21063_CTRL_VS_ANTI_IGM_STIM_BCELL_NFATC1_KO_3H_UP	0.00148588	0.0323518	0.544381	2.3633	0	134
GO_THREONINE_TYPE_PEPTIDASE_ACTIVITY	0.00179211	0.0323518	0.81462	2.36272	0	18
GCM_NPM1	0.00152439	0.0323518	0.556795	2.36255	0	112
LUI_THYROID_CANCER_PAX8_PPARG_DN	0.00163934	0.0323518	0.661075	2.36151	0	39
STARK_PREFRONTAL_CORTEX_22Q11_DELETION_DN	0.00123916	0.0323518	0.471921	2.35122	0	411
GSE26030_TH1_VS_TH17_DAY15_POST_POLARIZATION_DN	0.00139276	0.0323518	0.513331	2.34221	0	178
GO_HEME_METABOLIC_PROCESS	0.00170068	0.0323518	0.74254	2.34189	0	24
REACTOME_INFLUENZA_LIFE_CYCLE	0.00149925	0.0323518	0.540519	2.33993	0	130
GO_TETRAPYRROLE_METABOLIC_PROCESS	0.00163934	0.0323518	0.648773	2.33532	0	41
GO_NUCLEOSIDE_TRIPHOSPHATE_METABOLIC_PROCESS	0.00139665	0.0323518	0.511026	2.33192	0	179
GO_ORGANELLE_INNER_MEMBRANE	0.00124688	0.0323518	0.467904	2.32993	0	414
BILANGES_SERUM_AND_RAPAMYCIN_SENSITIVE_GENES	0.00158479	0.0323518	0.601868	2.3278	0	63
REACTOME_ER_PHAGOSOME_PATHWAY	0.00162602	0.0323518	0.61792	2.32469	0	52
GO_CELLULAR_RESPIRATION	0.00152672	0.0323518	0.542009	2.31281	0	119
MODULE_42	0.00170068	0.0323518	0.732438	2.31003	0	24
GO_PIGMENT_METABOLIC_PROCESS	0.00167224	0.0323518	0.646394	2.30971	0	40
REACTOME_AUTODEGRADATION_OF_THE_E3_UBIQUITIN_LIGASE_COP1	0.00162602	0.0323518	0.629382	2.30805	0	45
GO_NADH_DEHYDROGENASE_COMPLEX_ASSEMBLY	0.00164474	0.0323518	0.618605	2.30632	0	50
GO_MITOCHONDRIAL_RESPIRATORY_CHAIN_COMPLEX_I_ASSEMBLY	0.00164474	0.0323518	0.618605	2.30632	0	50
GO_MITOCHONDRIAL_RESPIRATORY_CHAIN_COMPLEX_I_BIOGENESIS	0.00164474	0.0323518	0.618605	2.30632	0	50
MODULE_77	0.00163666	0.0323518	0.698841	2.30132	0	27
REACTOME_CDK_MEDIATED_PHOSPHORYLATION_AND_REMOVAL_OF_CDC6	0.00162602	0.0323518	0.6272	2.30005	0	45
MODULE_116	0.00166389	0.0323518	0.709338	2.29656	0	26
HALLMARK_OXIDATIVE_PHOSPHORYLATION	0.00140056	0.0323518	0.501348	2.29481	0	189
POMEROY_MEDULLOBLASTOMA_DESMOPLASIC_VS_CLASSIC_DN	0.00165289	0.0323518	0.65237	2.29348	0	36
REACTOME_CROSS_PRESENTATION_OF_SOLUBLE_EXOGENOUS_ANTIGENS_ENDOSOMES	0.00161551	0.0323518	0.630159	2.29159	0	42
GO_REGULATION_OF_CELLULAR_AMINE_METABOLIC_PROCESS	0.00157978	0.0323518	0.583423	2.28694	0	68
BIOCARTA_PROTEASOME_PATHWAY	0.00167224	0.0323518	0.691327	2.2853	0	28
GNF2_ST13	0.00161812	0.0323518	0.597499	2.28377	0	61
GO_STRUCTURAL_MOLECULE_ACTIVITY	0.00127226	0.0323518	0.463068	2.28038	0	364
REACTOME_REGULATION_OF_APOPTOSIS	0.00164204	0.0323518	0.60813	2.27873	0	51
REACTOME_DESTABILIZATION_OF_MRNA_BY_AUF1_HNRNP_D0	0.00165017	0.0323518	0.614465	2.2773	0	48
GO_TETRAPYRROLE_BIOSYNTHETIC_PROCESS	0.00167504	0.0323518	0.713268	2.27655	0	25
REACTOME_SCFSKP2_MEDIATED_DEGRADATION_OF_P27_P21	0.00164204	0.0323518	0.607254	2.27544	0	51
REACTOME_ANTIGEN_PROCESSING_CROSS_PRESENTATION	0.00158983	0.0323518	0.588849	2.2701	0	62
GSE14000_TRANSLATED_RNA_VS_MRNA_16H_LPS_DC_DN	0.00151286	0.0323518	0.527236	2.269	0	127
GO_TRANSLATIONAL_ELONGATION	0.00155521	0.0323518	0.537248	2.26185	0	105
WONG_MITOCHONDRIA_GENE_MODULE	0.00140449	0.0323518	0.488277	2.25323	0	205
GNF2_CARD15	0.00164204	0.0323518	0.600695	2.25087	0	51
LUI_THYROID_CANCER_CLUSTER_3	0.00163666	0.0323518	0.682259	2.24672	0	27
GO_PROTON_TRANSPORTING_TWO_SECTOR_ATPASE_COMPLEX	0.00165289	0.0323518	0.638916	2.24618	0	36
MORF_JUND	0.00161812	0.0323518	0.587617	2.246	0	61
GO_MITOCHONDRIAL_TRANSLATION	0.00152439	0.0323518	0.535532	2.2449	0	101
LUI_TARGETS_OF_PAX8_PPARG_FUSION	0.00166389	0.0323518	0.664393	2.24233	0	31
GSE3720_UNSTIM_VS_PMA_STIM_VD1_GAMMADELTA_TCELL_UP	0.00146628	0.0323518	0.506342	2.23755	0	147
GNF2_DAP3	0.00152439	0.0323518	0.52613	2.23244	0	112
GSE41978_ID2_KO_VS_ID2_KO_AND_BIM_KO_KLRG1_LOW_EFFECTOR_CD8_TCELL_DN	0.00142248	0.0323518	0.494595	2.22994	0	166
MODULE_28	0.00165289	0.0323518	0.65019	2.22265	0	32
MODULE_93	0.00151515	0.0323518	0.517129	2.21766	0	121
REACTOME_P53_DEPENDENT_G1_DNA_DAMAGE_RESPONSE	0.00164204	0.0323518	0.591798	2.21753	0	51
GO_ANTIGEN_PROCESSING_AND_PRESENTATION_OF_PEPTIDE_ANTIGEN_VIA_MHC_CLASS_I	0.00158983	0.0323518	0.55622	2.2161	0	75
MODULE_146	0.00166389	0.0323518	0.656465	2.21558	0	31
MORF_ERH	0.00152439	0.0323518	0.521269	2.21305	0	113
MORF_UBE2I	0.00139082	0.0323518	0.47354	2.21292	0	231
GNF2_HCK	0.0015748	0.0323518	0.559463	2.20855	0	71
MORF_ATOX1	0.0015625	0.0323518	0.549339	2.20161	0	76
MODULE_86	0.00163934	0.0323518	0.616191	2.20118	0	39
GO_HEME_BIOSYNTHETIC_PROCESS	0.00176678	0.0323518	0.740956	2.20078	0	19
VANLOO_SP3_TARGETS_DN	0.00158983	0.0323518	0.570478	2.19927	0	62
GSE2405_0H_VS_1.5H_A_PHAGOCYTOPHILUM_STIM_NEUTROPHIL_UP	0.00155039	0.0323518	0.519371	2.19022	0	106
TAKAO_RESPONSE_TO_UVB_RADIATION_UP	0.00155763	0.0323518	0.543275	2.18952	0	78
KAAB_FAILED_HEART_ATRIUM_DN	0.00153846	0.0323518	0.517107	2.18512	0	108
REACTOME_CDT1_ASSOCIATION_WITH_THE_CDC6_ORC_ORIGIN_COMPLEX	0.00164474	0.0323518	0.581399	2.18487	0	53
GO_AMIDE_BIOSYNTHETIC_PROCESS	0.00123305	0.0323518	0.435766	2.1833	0	423
HILLION_HMGA1B_TARGETS	0.00158479	0.0323518	0.563985	2.18128	0	63
KEGG_CARDIAC_MUSCLE_CONTRACTION	0.00163934	0.0323518	0.610572	2.1811	0	39
MODULE_363	0.00160256	0.0323518	0.595777	2.17858	0	44
REACTOME_METABOLISM_OF_RNA	0.00137741	0.0323518	0.462092	2.17605	0	243
GO_MITOCHONDRIAL_RESPIRATORY_CHAIN_COMPLEX_ASSEMBLY	0.00161812	0.0323518	0.568753	2.1739	0	61
VALK_AML_CLUSTER_7	0.00178571	0.0323518	0.756606	2.16876	0	17
GSE25147_UNSTIM_VS_HELIOBACTER_PYLORI_LPS_STIM_MKN45_CELL_UP	0.00151976	0.0323518	0.508521	2.16806	0	116
VALK_AML_CLUSTER_8	0.00179211	0.0323518	0.746758	2.16589	0	18
GSE22886_NAIVE_VS_IGG_IGA_MEMORY_BCELL_DN	0.00144509	0.0323518	0.483994	2.16519	0	156
DAZARD_UV_RESPONSE_CLUSTER_G1	0.00165017	0.0323518	0.584152	2.16495	0	48
GUO_HEX_TARGETS_DN	0.00162866	0.0323518	0.587429	2.16416	0	46
GO_HYDROGEN_ION_TRANSMEMBRANE_TRANSPORTER_ACTIVITY	0.0015949	0.0323518	0.552725	2.16176	0	67
DIRMEIER_LMP1_RESPONSE_LATE_DN	0.00166389	0.0323518	0.666975	2.1594	0	26
IVANOVA_HEMATOPOIESIS_MATURE_CELL	0.00137552	0.0323518	0.459756	2.15761	0	236
GO_HYDROGEN_ION_TRANSMEMBRANE_TRANSPORT	0.00157978	0.0323518	0.546209	2.15337	0	70
NADLER_OBESITY_UP	0.00164474	0.0323518	0.576136	2.14798	0	50
REACTOME_SCF_BETA_TRCP_MEDIATED_DEGRADATION_OF_EMI1	0.00165563	0.0323518	0.580804	2.14353	0	47
REACTOME_AUTODEGRADATION_OF_CDH1_BY_CDH1_APC_C	0.0016129	0.0323518	0.56602	2.14055	0	56
GO_CELLULAR_PROTEIN_COMPLEX_DISASSEMBLY	0.00153846	0.0323518	0.505212	2.13749	0	109
GSE19941_IL10_KO_VS_IL10_KO_AND_NFKBP50_KO_LPS_STIM_MACROPHAGE_DN	0.00145773	0.0323518	0.483081	2.13231	0	145
GO_ORGANELLAR_LARGE_RIBOSOMAL_SUBUNIT	0.00168919	0.0323518	0.646063	2.12984	0	29
NGO_MALIGNANT_GLIOMA_1P_LOH	0.00178571	0.0323518	0.742541	2.12845	0	17
GO_NUCLEOSIDE_MONOPHOSPHATE_METABOLIC_PROCESS	0.00138313	0.0323518	0.464227	2.12801	0	186
GO_NUCLEOSIDE_TRIPHOSPHATE_BIOSYNTHETIC_PROCESS	0.00165563	0.0323518	0.575682	2.12463	0	47
GO_MULTI_ORGANISM_METABOLIC_PROCESS	0.00149031	0.0323518	0.48865	2.12058	0	131
GO_RRNA_BINDING	0.00162602	0.0323518	0.563648	2.12051	0	52
JAATINEN_HEMATOPOIETIC_STEM_CELL_DN	0.00148588	0.0323518	0.487526	2.11973	0	135
GSE26030_TH1_VS_TH17_RESTIMULATED_DAY15_POST_POLARIZATION_DN	0.00142045	0.0323518	0.468309	2.1181	0	171
GSE7509_UNSTIM_VS_FCGRIIB_STIM_MONOCYTE_UP	0.00148588	0.0323518	0.486942	2.11394	0	134
GSE29618_BCELL_VS_MDC_DN	0.00140647	0.0323518	0.463514	2.10962	0	177
KEEN_RESPONSE_TO_ROSIGLITAZONE_DN	0.00156006	0.0323518	0.519021	2.10576	0	82
GO_PROTON_TRANSPORTING_ATP_SYNTHASE_COMPLEX	0.00179211	0.0323518	0.725062	2.10297	0	18
GO_CELLULAR_RESPONSE_TO_CORTICOSTEROID_STIMULUS	0.00166389	0.0323518	0.605398	2.1027	0	35
GO_IRON_ION_HOMEOSTASIS	0.00161551	0.0323518	0.577169	2.09889	0	42
LI_INDUCED_T_TO_NATURAL_KILLER_UP	0.00137552	0.0323518	0.446946	2.09749	0	236
HOLLEMAN_VINCRISTINE_RESISTANCE_B_ALL_DN	0.00178253	0.0323518	0.756739	2.09508	0	15
ALCALA_APOPTOSIS	0.00155763	0.0323518	0.520742	2.0934	0	77
GSE10325_LUPUS_CD4_TCELL_VS_LUPUS_MYELOID_DN	0.0014245	0.0323518	0.464419	2.09329	0	165
GO_OXIDOREDUCTASE_COMPLEX	0.00156006	0.0323518	0.515795	2.09267	0	82
GO_ESTABLISHMENT_OF_PROTEIN_LOCALIZATION_TO_MEMBRANE	0.00137931	0.0323518	0.448187	2.08639	0	218
GO_RIBOSOME_ASSEMBLY	0.00165017	0.0323518	0.562707	2.08547	0	48
GSE26030_UNSTIM_VS_RESTIM_TH1_DAY5_POST_POLARIZATION_DN	0.00139665	0.0323518	0.456663	2.08384	0	179
GO_ORGANELLAR_SMALL_RIBOSOMAL_SUBUNIT	0.00167504	0.0323518	0.652569	2.08282	0	25
GO_ENERGY_DERIVATION_BY_OXIDATION_OF_ORGANIC_COMPOUNDS	0.0014245	0.0323518	0.462375	2.08237	0	161
MORF_PPP1CA	0.00142653	0.0323518	0.460559	2.07769	0	163
GSE3039_CD4_TCELL_VS_ALPHABETA_CD8_TCELL_DN	0.00145773	0.0323518	0.470489	2.07673	0	145
KEGG_METABOLISM_OF_XENOBIOTICS_BY_CYTOCHROME_P450	0.00172117	0.0323518	0.686132	2.07627	0	20
TIEN_INTESTINE_PROBIOTICS_6HR_UP	0.00165017	0.0323518	0.56016	2.07603	0	49
REACTOME_P53_INDEPENDENT_G1_S_DNA_DAMAGE_CHECKPOINT	0.00165563	0.0323518	0.562204	2.07489	0	47
MORF_ANP32B	0.00139665	0.0323518	0.453517	2.07294	0	192
MORF_AP2M1	0.00139082	0.0323518	0.447588	2.07098	0	206
GSE29618_BCELL_VS_MONOCYTE_DN	0.00141443	0.0323518	0.4568	2.06868	0	172
GSE9006_TYPE_1_DIABETES_AT_DX_VS_4MONTH_POST_DX_PBMC_DN	0.00153374	0.0323518	0.488349	2.06843	0	111
GSE13485_DAY1_VS_DAY21_YF17D_VACCINE_PBMC_DN	0.00145985	0.0323518	0.468524	2.06812	0	146
YAMASHITA_LIVER_CANCER_WITH_EPCAM_UP	0.00163934	0.0323518	0.573945	2.06597	0	41
GO_HYDROGEN_TRANSPORT	0.00155039	0.0323518	0.505095	2.06594	0	89
LI_AMPLIFIED_IN_LUNG_CANCER	0.00151745	0.0323518	0.480097	2.06558	0	125
GO_REGULATION_OF_ESTABLISHMENT_OF_PLANAR_POLARITY	0.0015625	0.0323518	0.514693	2.06275	0	76
GO_COFACTOR_BIOSYNTHETIC_PROCESS	0.00151057	0.0323518	0.476784	2.06096	0	129
GO_PEPTIDE_METABOLIC_PROCESS	0.00122249	0.0323518	0.409704	2.05983	0	441
GO_RESPONSE_TO_TYPE_I_INTERFERON	0.00163934	0.0323518	0.571808	2.05828	0	41
REACTOME_ASSEMBLY_OF_THE_PRE_REPLICATIVE_COMPLEX	0.00158983	0.0323518	0.533448	2.05652	0	62
GSE34515_CD16_NEG_VS_POS_MONOCYTE_DN	0.00145985	0.0323518	0.464945	2.05232	0	146
GSE22886_NAIVE_CD4_TCELL_VS_MONOCYTE_DN	0.00142248	0.0323518	0.453695	2.05178	0	170
MORF_PSMC1	0.00140647	0.0323518	0.450286	2.04941	0	177
MOOTHA_HUMAN_MITODB_6_2002	0.00127065	0.0323518	0.415259	2.04851	0	368
GOLDRATH_NAIVE_VS_MEMORY_CD8_TCELL_DN	0.00146199	0.0323518	0.460946	2.04838	0	153
HUANG_GATA2_TARGETS_UP	0.00149031	0.0323518	0.471998	2.04831	0	131
GSE24026_PD1_LIGATION_VS_CTRL_IN_ACT_TCELL_LINE_UP	0.00148588	0.0323518	0.471005	2.0479	0	135
KEGG_DRUG_METABOLISM_CYTOCHROME_P450	0.00172117	0.0323518	0.675564	2.0443	0	20
KEGG_ALZHEIMERS_DISEASE	0.00148588	0.0323518	0.470892	2.04313	0	132
GO_PIGMENT_BIOSYNTHETIC_PROCESS	0.00165289	0.0323518	0.597647	2.04304	0	32
GSE22886_NAIVE_CD8_TCELL_VS_MONOCYTE_DN	0.00142045	0.0323518	0.452444	2.0425	0	168
GO_TRANSITION_METAL_ION_HOMEOSTASIS	0.0015748	0.0323518	0.519396	2.04206	0	69
KEGG_RETINOL_METABOLISM	0.00178253	0.0323518	0.737146	2.04084	0	15
REACTOME_APC_C_CDH1_MEDIATED_DEGRADATION_OF_CDC20_AND_OTHER_APC_C_CDH1_TARGETED_PROTEINS_IN_LATE_MITOSIS_EARLY_G1	0.00158479	0.0323518	0.527201	2.03902	0	63
GSE17580_UNINFECTED_VS_S_MANSONI_INF_TREG_DN	0.0014245	0.0323518	0.452493	2.03786	0	161
MOOTHA_MITOCHONDRIA	0.00127389	0.0323518	0.412903	2.03611	0	370
BECKER_TAMOXIFEN_RESISTANCE_UP	0.00165837	0.0323518	0.576709	2.03556	0	37
MODULE_223	0.0015625	0.0323518	0.507322	2.03322	0	76
GCM_ACTG1	0.00151515	0.0323518	0.474546	2.03235	0	120
GSE23502_WT_VS_HDC_KO_MYELOID_DERIVED_SUPPRESSOR_CELL_BM_DN	0.00143678	0.0323518	0.45258	2.03124	0	160
MORF_SKP1A	0.00140647	0.0323518	0.441924	2.02849	0	197
GO_CELLULAR_TRANSITION_METAL_ION_HOMEOSTASIS	0.00165017	0.0323518	0.546664	2.02602	0	49
GOLDRATH_ANTIGEN_RESPONSE	0.00131579	0.0323518	0.421363	2.02598	0	292
MALONEY_RESPONSE_TO_17AAG_DN	0.00157729	0.0323518	0.51235	2.02548	0	72
GSE29618_MONOCYTE_VS_PDC_UP	0.00145138	0.0323518	0.45229	2.02408	0	159
FLECHNER_BIOPSY_KIDNEY_TRANSPLANT_REJECTED_VS_OK_UP	0.0015949	0.0323518	0.517467	2.02386	0	67
REACTOME_ORC1_REMOVAL_FROM_CHROMATIN	0.00158479	0.0323518	0.523253	2.02375	0	63
GO_GENERATION_OF_PRECURSOR_METABOLITES_AND_ENERGY	0.00140449	0.0323518	0.437989	2.02314	0	207
GSE46606_UNSTIM_VS_CD40L_IL2_IL5_3DAY_STIMULATED_IRF4HIGH_SORTED_BCELL_DN	0.00164474	0.0323518	0.5421	2.02109	0	50
GSE33425_CD161_HIGH_VS_NEG_CD8_TCELL_DN	0.00142045	0.0323518	0.447375	2.01961	0	168
GSE45837_WT_VS_GFI1_KO_PDC_DN	0.00139276	0.0323518	0.441598	2.01957	0	185
BRACHAT_RESPONSE_TO_METHOTREXATE_DN	0.00172414	0.0323518	0.653798	2.01921	0	22
GSE39820_TGFBETA1_IL6_VS_TGFBETA1_IL6_IL23A_TREATED_CD4_TCELL_DN	0.00147929	0.0323518	0.459937	2.01846	0	142
MODULE_43	0.0015949	0.0323518	0.515939	2.01789	0	67
GO_OXIDOREDUCTASE_ACTIVITY_ACTING_ON_NAD_P_H	0.00157978	0.0323518	0.511442	2.01631	0	70
REACTOME_METABOLISM_OF_PROTEINS	0.00126263	0.0323518	0.410305	2.01617	0	355
PELLICCIOTTA_HDAC_IN_ANTIGEN_PRESENTATION_DN	0.00162602	0.0323518	0.549106	2.01366	0	45
GO_RESPONSE_TO_DEXAMETHASONE	0.00172414	0.0323518	0.651753	2.01289	0	22
GSE34205_HEALTHY_VS_RSV_INF_INFANT_PBMC_DN	0.00146843	0.0323518	0.457104	2.01228	0	144
MORF_PPP2R4	0.00162866	0.0323518	0.546048	2.0117	0	46
MODULE_307	0.00167504	0.0323518	0.629893	2.01045	0	25
GSE29618_PDC_VS_MDC_DN	0.00143678	0.0323518	0.447847	2.00999	0	160
REACTOME_ACTIVATION_OF_NF_KAPPAB_IN_B_CELLS	0.00158479	0.0323518	0.525952	2.00964	0	59
SANA_RESPONSE_TO_IFNG_DN	0.0016129	0.0323518	0.520518	2.00789	0	64
GO_RIBONUCLEOSIDE_TRIPHOSPHATE_BIOSYNTHETIC_PROCESS	0.00163934	0.0323518	0.561845	2.00704	0	39
LI_LUNG_CANCER	0.00169205	0.0323518	0.602713	2.00657	0	30
JIANG_AGING_HYPOTHALAMUS_UP	0.00161551	0.0323518	0.55139	2.00514	0	42
KAECH_NAIVE_VS_DAY15_EFF_CD8_TCELL_DN	0.0014556	0.0323518	0.449731	2.00421	0	154
GSE3039_CD4_TCELL_VS_B2_BCELL_DN	0.00147059	0.0323518	0.453029	2.00396	0	150
GSE9509_10MIN_VS_30MIN_LPS_STIM_IL10_KO_MACROPHAGE_UP	0.00143885	0.0323518	0.447114	2.00227	0	157
NING_CHRONIC_OBSTRUCTIVE_PULMONARY_DISEASE_DN	0.00152905	0.0323518	0.488064	2.00192	0	88
GSE40274_CTRL_VS_FOXP3_AND_GATA1_TRANSDUCED_ACTIVATED_CD4_TCELL_UP	0.00152905	0.0323518	0.487356	1.99902	0	88
GO_AMMONIUM_TRANSPORT	0.00166389	0.0323518	0.592057	1.9982	0	31
GSE9650_NAIVE_VS_EFF_CD8_TCELL_DN	0.00142248	0.0323518	0.443081	1.99768	0	166
GSE25123_WT_VS_PPARG_KO_MACROPHAGE_DN	0.00145985	0.0323518	0.449762	1.99594	0	152
MODULE_273	0.00165017	0.0323518	0.538546	1.99593	0	49
GSE40655_FOXO1_KO_VS_WT_NTREG_DN	0.00147929	0.0323518	0.458961	1.99556	0	133
GO_PROTEASOME_COMPLEX	0.00157978	0.0323518	0.50604	1.99501	0	70
GSE21774_CD56_BRIGHT_VS_DIM_CD62L_POSITIVE_NK_CELL_DN	0.00148588	0.0323518	0.459789	1.99496	0	132
HESS_TARGETS_OF_HOXA9_AND_MEIS1_DN	0.00157978	0.0323518	0.508622	1.99373	0	68
HOLLEMAN_VINCRISTINE_RESISTANCE_ALL_DN	0.00176678	0.0323518	0.67059	1.99178	0	19
GNF2_CD14	0.00166389	0.0323518	0.614753	1.99033	0	26
HOUSTIS_ROS	0.00327332	0.0323518	0.603605	1.9877	1	27
GO_MITOCHONDRIAL_ATP_SYNTHESIS_COUPLED_PROTON_TRANSPORT	0.00179856	0.0323518	0.707882	1.98719	0	16
GSE22886_NAIVE_CD4_TCELL_VS_DC_DN	0.0013986	0.0323518	0.437065	1.98691	0	173
GSE21670_UNTREATED_VS_TGFB_IL6_TREATED_CD4_TCELL_DN	0.00153846	0.0323518	0.46922	1.98521	0	109
GSE42088_UNINF_VS_LEISHMANIA_INF_DC_2H_DN	0.00142045	0.0323518	0.438923	1.98519	0	171
GO_THIOLESTER_HYDROLASE_ACTIVITY	0.00170068	0.0323518	0.629307	1.98477	0	24
KAECH_NAIVE_VS_DAY8_EFF_CD8_TCELL_DN	0.00140845	0.0323518	0.435922	1.9825	0	175
GSE2770_UNTREATED_VS_ACT_CD4_TCELL_6H_UP	0.0014556	0.0323518	0.444851	1.98246	0	154
GO_RNA_CATABOLIC_PROCESS	0.00140449	0.0323518	0.429599	1.98245	0	205
BROWNE_HCMV_INFECTION_24HR_DN	0.00152439	0.0323518	0.482856	1.98158	0	87
DEMAGALHAES_AGING_UP	0.00165837	0.0323518	0.560726	1.97915	0	37
GNF2_CD1D	0.00169492	0.0323518	0.579968	1.97736	0	33
ALTEMEIER_RESPONSE_TO_LPS_WITH_MECHANICAL_VENTILATION	0.00154799	0.0323518	0.476906	1.97537	0	94
TAKEDA_TARGETS_OF_NUP98_HOXA9_FUSION_16D_UP	0.00155763	0.0323518	0.485883	1.9734	0	83
GSE17721_0.5H_VS_24H_CPG_BMDC_UP	0.0014245	0.0323518	0.437734	1.97301	0	165
GO_GLYCOSYL_COMPOUND_METABOLIC_PROCESS	0.00134048	0.0323518	0.414265	1.96961	0	265
GNF2_UBE2I	0.00167224	0.0323518	0.55073	1.96789	0	40
REACTOME_SIGNALING_BY_WNT	0.00158983	0.0323518	0.513925	1.96694	0	60
REACTOME_DOWNSTREAM_SIGNALING_EVENTS_OF_B_CELL_RECEPTOR_BCR	0.00152439	0.0323518	0.479092	1.96613	0	87
GSE6269_FLU_VS_E_COLI_INF_PBMC_DN	0.00157978	0.0323518	0.498365	1.96475	0	70
BOUDOUKHA_BOUND_BY_IGF2BP2	0.00152905	0.0323518	0.478755	1.96374	0	88
CHIANG_LIVER_CANCER_SUBCLASS_UNANNOTATED_DN	0.00142248	0.0323518	0.434669	1.95976	0	166
IIZUKA_LIVER_CANCER_PROGRESSION_L0_L1_DN	0.00176678	0.0323518	0.659531	1.95893	0	19
MARTINEZ_RESPONSE_TO_TRABECTEDIN_UP	0.00160514	0.0323518	0.516438	1.95878	0	58
REACTOME_CYCLIN_E_ASSOCIATED_EVENTS_DURING_G1_S_TRANSITION_	0.00158983	0.0323518	0.511591	1.95801	0	60
GSE22886_NAIVE_BCELL_VS_NEUTROPHIL_DN	0.0014556	0.0323518	0.439038	1.95655	0	154
GSE29618_PDC_VS_MDC_DAY7_FLU_VACCINE_DN	0.00141844	0.0323518	0.432975	1.95325	0	164
HOLLEMAN_ASPARAGINASE_RESISTANCE_ALL_DN	0.00172414	0.0323518	0.631607	1.95068	0	22
GSE22886_NAIVE_BCELL_VS_MONOCYTE_DN	0.0013986	0.0323518	0.428521	1.94807	0	173
GSE29618_BCELL_VS_MDC_DAY7_FLU_VACCINE_DN	0.00142045	0.0323518	0.431165	1.94644	0	168
GO_TUMOR_NECROSIS_FACTOR_MEDIATED_SIGNALING_PATHWAY	0.00152905	0.0323518	0.474484	1.94622	0	88
GSE6269_FLU_VS_STAPH_AUREUS_INF_PBMC_DN	0.00146628	0.0323518	0.443589	1.94521	0	140
GSE21546_SAP1A_KO_VS_SAP1A_KO_AND_ELK1_KO_ANTI_CD3_STIM_DP_THYMOCYTES_UP	0.00148588	0.0323518	0.446951	1.94331	0	135
GSE32164_RESTING_DIFFERENTIATED_VS_CMYC_INHIBITED_MACROPHAGE_DN	0.00142248	0.0323518	0.429563	1.94265	0	170
GSE18893_TCONV_VS_TREG_24H_CULTURE_UP	0.00146843	0.0323518	0.441248	1.94248	0	144
GO_ANAPHASE_PROMOTING_COMPLEX_DEPENDENT_CATABOLIC_PROCESS	0.00155763	0.0323518	0.48662	1.94132	0	74
GO_PROTEIN_LOCALIZATION_TO_MEMBRANE	0.00132979	0.0323518	0.405183	1.9403	0	277
AKL_HTLV1_INFECTION_UP	0.00172414	0.0323518	0.628184	1.94011	0	22
MODULE_75	0.00139082	0.0323518	0.416981	1.93708	0	216
GSE15767_MED_VS_SCS_MAC_LN_UP	0.00145985	0.0323518	0.436387	1.9355	0	151
ROSS_AML_OF_FAB_M7_TYPE	0.00164474	0.0323518	0.514483	1.9334	0	53
GNF2_STAT6	0.0015748	0.0323518	0.490896	1.93	0	69
GO_MONOCARBOXYLIC_ACID_BINDING	0.00332779	0.0323518	0.596002	1.92962	1	26
GNF2_TNFRSF1B	0.00164474	0.0323518	0.517335	1.92876	0	50
GO_MONOVALENT_INORGANIC_CATION_TRANSPORT	0.00142045	0.0323518	0.426378	1.92845	0	171
MORF_EIF3S6	0.00153374	0.0323518	0.4529	1.92794	0	118
GSE32901_TH17_EMRICHED_VS_TH17_NEG_CD4_TCELL_UP	0.0016129	0.0323518	0.509798	1.92793	0	56
MODULE_4	0.00344234	0.0327463	0.636458	1.92596	1	20
GSE22886_NEUTROPHIL_VS_MONOCYTE_DN	0.00138504	0.0323518	0.419506	1.92109	0	183
GO_REGULATION_OF_CELLULAR_KETONE_METABOLIC_PROCESS	0.00151745	0.0323518	0.450069	1.92099	0	117
GO_RESPONSE_TO_AMINE	0.00327332	0.0323518	0.583188	1.92047	1	27
DELYS_THYROID_CANCER_UP	0.00136612	0.0323518	0.406319	1.91762	0	247
GO_CELLULAR_IRON_ION_HOMEOSTASIS	0.00327332	0.0323518	0.582106	1.91691	1	27
GSE17721_CPG_VS_GARDIQUIMOD_0.5H_BMDC_UP	0.00151976	0.0323518	0.449605	1.91688	0	116
NATSUME_RESPONSE_TO_INTERFERON_BETA_DN	0.00166113	0.0323518	0.540827	1.91582	0	38
WUNDER_INFLAMMATORY_RESPONSE_AND_CHOLESTEROL_UP	0.00165837	0.0323518	0.54248	1.91474	0	37
FLOTHO_PEDIATRIC_ALL_THERAPY_RESPONSE_UP	0.00162866	0.0323518	0.51954	1.91404	0	46
DACOSTA_ERCC3_ALLELE_XPCS_VS_TTD_DN	0.00353357	0.0329808	0.64412	1.91316	1	19
GSE29618_BCELL_VS_MONOCYTE_DAY7_FLU_VACCINE_DN	0.00143062	0.0323518	0.424142	1.9128	0	169
HOLLMANN_APOPTOSIS_VIA_CD40_DN	0.00138504	0.0323518	0.417286	1.91092	0	183
GO_RESPONSE_TO_ARSENIC_CONTAINING_SUBSTANCE	0.00169205	0.0323518	0.611979	1.91087	0	23
GO_PYRIMIDINE_NUCLEOSIDE_METABOLIC_PROCESS	0.00166389	0.0323518	0.566148	1.91075	0	31
GO_MITOCHONDRIAL_TRANSMEMBRANE_TRANSPORT	0.00165017	0.0323518	0.515018	1.90873	0	49
KAECH_DAY8_EFF_VS_DAY15_EFF_CD8_TCELL_UP	0.0013986	0.0323518	0.419542	1.90725	0	173
GO_HYDROGEN_EXPORTING_ATPASE_ACTIVITY	0.00344234	0.0327463	0.630134	1.90682	1	20
MODULE_46	0.00140252	0.0323518	0.412415	1.90672	0	210
GO_RESPONSE_TO_IRON_ION	0.00172414	0.0323518	0.616527	1.9041	0	22
GSE29164_DAY3_VS_DAY7_CD8_TCELL_AND_IL12_TREATED_MELANOMA_UP	0.00142045	0.0323518	0.421722	1.90381	0	168
GO_NIK_NF_KAPPAB_SIGNALING	0.00157729	0.0323518	0.481247	1.90252	0	72
GO_MONOVALENT_INORGANIC_CATION_TRANSMEMBRANE_TRANSPORTER_ACTIVITY	0.00152672	0.0323518	0.445799	1.90227	0	119
MODULE_32	0.00139082	0.0323518	0.407027	1.90019	0	225
GNF2_CD33	0.00166113	0.0323518	0.536335	1.8999	0	38
GSE23568_CTRL_TRANSDUCED_VS_WT_CD8_TCELL_UP	0.00142045	0.0323518	0.419364	1.89673	0	171
REACTOME_REGULATION_OF_MRNA_STABILITY_BY_PROTEINS_THAT_BIND_AU_RICH_ELEMENTS	0.00155763	0.0323518	0.471581	1.89578	0	77
GO_RIBOSOMAL_SMALL_SUBUNIT_ASSEMBLY	0.00359712	0.0333182	0.675254	1.8956	1	16
REACTOME_APC_C_CDC20_MEDIATED_DEGRADATION_OF_MITOTIC_PROTEINS	0.0016129	0.0323518	0.491269	1.89506	0	64
SHIPP_DLBCL_VS_FOLLICULAR_LYMPHOMA_UP	0.00161551	0.0323518	0.51933	1.8933	0	43
GSE13887_ACT_CD4_VS_NO_TREATED_CD4_TCELL_UP	0.00499168	0.0410601	0.584732	1.89313	2	26
GO_OXIDOREDUCTASE_ACTIVITY_ACTING_ON_A_HEME_GROUP_OF_DONORS	0.00344828	0.0327795	0.619145	1.89082	1	21
GO_2_IRON_2_SULFUR_CLUSTER_BINDING	0.00353357	0.0329808	0.636477	1.89046	1	19
GO_OXIDOREDUCTASE_ACTIVITY_ACTING_ON_PEROXIDE_AS_ACCEPTOR	0.00499168	0.0410601	0.583874	1.89036	2	26
MORF_GPX4	0.00164474	0.0323518	0.502895	1.88985	0	53
GSE40274_FOXP3_VS_FOXP3_AND_LEF1_TRANSDUCED_ACTIVATED_CD4_TCELL_UP	0.00145985	0.0323518	0.425788	1.8885	0	151
GO_INNATE_IMMUNE_RESPONSE_ACTIVATING_CELL_SURFACE_RECEPTOR_SIGNALING_PATHWAY	0.00154083	0.0323518	0.458008	1.88775	0	92
HILLION_HMGA1_TARGETS	0.00158479	0.0323518	0.493888	1.88713	0	59
REACTOME_MITOCHONDRIAL_PROTEIN_IMPORT	0.00162602	0.0323518	0.514509	1.88679	0	45
MORF_PRKAR1A	0.00148368	0.0323518	0.433642	1.88607	0	137
GO_ATP_HYDROLYSIS_COUPLED_TRANSMEMBRANE_TRANSPORT	0.00510204	0.0412574	0.597718	1.88514	2	24
ENK_UV_RESPONSE_KERATINOCYTE_UP	0.00126422	0.0323518	0.380515	1.88363	0	384
GSE21379_TFH_VS_NON_TFH_SAP_KO_CD4_TCELL_UP	0.00146628	0.0323518	0.426207	1.88343	0	147
GSE3720_LPS_VS_PMA_STIM_VD1_GAMMADELTA_TCELL_DN	0.00145985	0.0323518	0.426669	1.88336	0	146
GO_PURINE_CONTAINING_COMPOUND_METABOLIC_PROCESS	0.00134953	0.0323518	0.395802	1.88324	0	268
REACTOME_METABOLISM_OF_AMINO_ACIDS_AND_DERIVATIVES	0.00151745	0.0323518	0.436541	1.88105	0	128
APPIERTO_RESPONSE_TO_FENRETINIDE_DN	0.00334448	0.0323518	0.526343	1.88074	1	40
MORF_SOD1	0.00134228	0.0323518	0.395446	1.88065	0	266
GOLDRATH_NAIVE_VS_EFF_CD8_TCELL_DN	0.00142653	0.0323518	0.417162	1.88064	0	162
KIM_ALL_DISORDERS_DURATION_CORR_DN	0.00151515	0.0323518	0.43905	1.88033	0	120
GNF2_PECAM1	0.00162866	0.0323518	0.508739	1.87425	0	46
GSE42021_CD24INT_TREG_VS_CD24INT_TCONV_THYMUS_UP	0.00139665	0.0323518	0.410543	1.87339	0	179
BILANGES_SERUM_RESPONSE_TRANSLATION	0.00327332	0.0323518	0.568325	1.87153	1	27
GSE10325_CD4_TCELL_VS_MYELOID_DN	0.00145985	0.0323518	0.421453	1.87031	0	152
MODULE_159	0.00311526	0.0323518	0.468523	1.86913	1	74
VERHAAK_GLIOBLASTOMA_NEURAL	0.00314465	0.0323518	0.47064	1.8688	1	73
HAHTOLA_CTCL_CUTANEOUS	0.00689655	0.0511883	0.611858	1.86856	3	21
GSE17721_ALL_VS_24H_PAM3CSK4_BMDC_DN	0.00145985	0.0323518	0.420876	1.86775	0	152
MORF_FBL	0.00148588	0.0323518	0.429506	1.86746	0	135
BASSO_CD40_SIGNALING_DN	0.00323102	0.0323518	0.513291	1.8666	1	42
GCM_PSME1	0.00155763	0.0323518	0.459442	1.86625	0	84
GCM_CSNK2B	0.00152207	0.0323518	0.448462	1.86546	0	96
ZHONG_SECRETOME_OF_LUNG_CANCER_AND_MACROPHAGE	0.00158479	0.0323518	0.482216	1.86503	0	63
GSE6259_DEC205_POS_DC_VS_CD8_TCELL_UP	0.0014245	0.0323518	0.414006	1.86453	0	161
GSE339_CD4POS_VS_CD8POS_DC_DN	0.00143678	0.0323518	0.415284	1.86385	0	160
JOSEPH_RESPONSE_TO_SODIUM_BUTYRATE_UP	0.00502513	0.0411077	0.583653	1.86286	2	25
MODULE_488	0.00353357	0.0329808	0.627141	1.86273	1	19
LIANG_HEMATOPOIESIS_STEM_CELL_NUMBER_SMALL_VS_HUGE_UP	0.00334448	0.0323518	0.563356	1.86227	1	28
LAIHO_COLORECTAL_CANCER_SERRATED_UP	0.00155039	0.0323518	0.453986	1.86216	0	91
GO_RIBOSOMAL_LARGE_SUBUNIT_ASSEMBLY	0.00172414	0.0323518	0.602828	1.86179	0	22
GNF2_FBL	0.00147059	0.0323518	0.424866	1.86068	0	139
BIOCARTA_ACTINY_PATHWAY	0.00539568	0.0430849	0.662602	1.86008	2	16
ROME_INSULIN_TARGETS_IN_MUSCLE_UP	0.00127551	0.0323518	0.37978	1.85853	0	342
BROWNE_INTERFERON_RESPONSIVE_GENES	0.00164474	0.0323518	0.498398	1.85816	0	50
GSE21774_CD56_BRIGHT_VS_DIM_CD62L_POSITIVE_NK_CELL_UP	0.00146843	0.0323518	0.421914	1.85736	0	144
MODULE_375	0.00332779	0.0323518	0.550206	1.85695	1	31
REACTOME_M_G1_TRANSITION	0.003125	0.0323518	0.462987	1.85553	1	76
GNF2_CD53	0.00165017	0.0323518	0.500555	1.85513	0	48
GO_INORGANIC_CATION_TRANSMEMBRANE_TRANSPORTER_ACTIVITY	0.00139665	0.0323518	0.405692	1.85435	0	192
GNATENKO_PLATELET_SIGNATURE	0.00491803	0.0408056	0.519078	1.85427	2	39
GSE15930_STIM_VS_STIM_AND_TRICHOSTATINA_48H_CD8_T_CELL_UP	0.00143678	0.0323518	0.413094	1.85402	0	160
GNF2_CASP1	0.00154321	0.0323518	0.447765	1.85358	0	93
GSE12845_IGD_POS_VS_NEG_BLOOD_BCELL_DN	0.00145349	0.0323518	0.415398	1.85353	0	155
CAVARD_LIVER_CANCER_MALIGNANT_VS_BENIGN	0.00714286	0.0524058	0.646333	1.85267	3	17
GO_MACROMOLECULE_TRANSMEMBRANE_TRANSPORTER_ACTIVITY	0.00358423	0.0332679	0.638714	1.85252	1	18
NAKAYAMA_SOFT_TISSUE_TUMORS_PCA1_UP	0.00491803	0.0408056	0.518438	1.85198	2	39
GO_ENERGY_COUPLED_PROTON_TRANSPORT_DOWN_ELECTROCHEMICAL_GRADIENT	0.00353357	0.0329808	0.623305	1.85134	1	19
GO_ATP_SYNTHESIS_COUPLED_PROTON_TRANSPORT	0.00353357	0.0329808	0.623305	1.85134	1	19
GSE19888_ADENOSINE_A3R_INH_VS_ACT_WITH_INHIBITOR_PRETREATMENT_IN_MAST_CELL_UP	0.00153846	0.0323518	0.437869	1.85028	0	108
REACTOME_IRON_UPTAKE_AND_TRANSPORT	0.00510204	0.0412574	0.58662	1.85014	2	24
GO_HOMOPHILIC_CELL_ADHESION_VIA_PLASMA_MEMBRANE_ADHESION_MOLECULES	0.00502513	0.0411077	0.578765	1.84726	2	25
YAO_TEMPORAL_RESPONSE_TO_PROGESTERONE_CLUSTER_9	0.00165563	0.0323518	0.492875	1.84696	0	54
GSE34156_TLR1_TLR2_LIGAND_VS_NOD2_AND_TLR1_TLR2_LIGAND_24H_TREATED_MONOCYTE_UP	0.00145985	0.0323518	0.418293	1.84639	0	146
MORF_EIF4A2	0.00151057	0.0323518	0.427134	1.84634	0	129
GO_PEPTIDASE_ACTIVATOR_ACTIVITY	0.00654664	0.0493304	0.560066	1.84433	3	27
MODULE_414	0.00714286	0.0524058	0.642785	1.8425	3	17
BROWN_MYELOID_CELL_DEVELOPMENT_UP	0.00151745	0.0323518	0.431135	1.84017	0	117
GO_CELLULAR_RESPONSE_TO_DEXAMETHASONE_STIMULUS	0.00353357	0.0329808	0.619465	1.83993	1	19
GSE19888_ADENOSINE_A3R_INH_PRETREAT_AND_ACT_BY_A3R_VS_TCELL_MEMBRANES_ACT_MAST_CELL_UP	0.00146199	0.0323518	0.414028	1.83988	0	153
GO_REGULATION_OF_VIRAL_ENTRY_INTO_HOST_CELL	0.00539568	0.0430849	0.655026	1.83881	2	16
GO_OUTER_MEMBRANE	0.00149925	0.0323518	0.424243	1.83657	0	130
GSE42021_CD24LO_TREG_VS_CD24LO_TCONV_THYMUS_DN	0.00143062	0.0323518	0.407217	1.83647	0	169
GSE41978_KLRG1_HIGH_VS_LOW_EFFECTOR_CD8_TCELL_DN	0.00147059	0.0323518	0.41516	1.83644	0	150
MARKEY_RB1_ACUTE_LOF_DN	0.00138696	0.0323518	0.401429	1.83622	0	180
MODULE_82	0.00507614	0.0412475	0.587708	1.83508	2	23
FONTAINE_THYROID_TUMOR_UNCERTAIN_MALIGNANCY_DN	0.00719424	0.0526384	0.653263	1.83386	3	16
GSE14699_DELETIONAL_TOLERANCE_VS_ACTIVATED_CD8_TCELL_DN	0.00146199	0.0323518	0.414119	1.83343	0	149
GSE10325_LUPUS_BCELL_VS_LUPUS_MYELOID_DN	0.0014245	0.0323518	0.406899	1.83341	0	167
GO_CYTOPLASMIC_TRANSLATION	0.00332226	0.0323518	0.517444	1.83299	1	38
GSE34156_UNTREATED_VS_6H_TLR1_TLR2_LIGAND_TREATED_MONOCYTE_UP	0.00147929	0.0323518	0.417371	1.83165	0	142
GSE22886_NAIVE_TCELL_VS_MONOCYTE_DN	0.00142248	0.0323518	0.404658	1.83002	0	170
GO_FATTY_ACID_BINDING	0.00891266	0.0611812	0.660809	1.8295	4	15
MOOTHA_PGC	0.00126422	0.0323518	0.373837	1.82944	0	336
HALLMARK_ALLOGRAFT_REJECTION	0.00151057	0.0323518	0.422715	1.82724	0	129
GO_PYRIMIDINE_NUCLEOTIDE_BIOSYNTHETIC_PROCESS	0.00510204	0.0412574	0.579155	1.8266	2	24
GSE21033_1H_VS_24H_POLYIC_STIM_DC_DN	0.00149925	0.0323518	0.421673	1.82544	0	130
MORF_G22P1	0.00143062	0.0323518	0.404586	1.82461	0	169
GSE7509_FCGRIIB_VS_TNFA_IL1B_IL6_PGE_STIM_DC_UP	0.0014245	0.0323518	0.404607	1.82369	0	165
GSE26351_UNSTIM_VS_BMP_PATHWAY_STIM_HEMATOPOIETIC_PROGENITORS_UP	0.00141844	0.0323518	0.404164	1.82328	0	164
GAZDA_DIAMOND_BLACKFAN_ANEMIA_PROGENITOR_UP	0.00501672	0.0411077	0.551326	1.82251	2	28
MODULE_289	0.00501672	0.0411077	0.509923	1.82207	2	40
GO_NUCLEOBASE_CONTAINING_SMALL_MOLECULE_METABOLIC_PROCESS	0.00127226	0.0323518	0.369599	1.82163	0	367
HALLMARK_INTERFERON_ALPHA_RESPONSE	0.00308166	0.0323518	0.447601	1.82158	1	81
MODULE_115	0.00502513	0.0411077	0.570372	1.82047	2	25
GSE5099_CLASSICAL_M1_VS_ALTERNATIVE_M2_MACROPHAGE_UP	0.00148588	0.0323518	0.418336	1.81939	0	136
GSE29617_CTRL_VS_DAY3_TIV_FLU_VACCINE_PBMC_2008_DN	0.00144509	0.0323518	0.40668	1.81932	0	156
GSE18281_CORTICAL_VS_MEDULLARY_THYMOCYTE_DN	0.00314465	0.0323518	0.45791	1.81826	1	73
REN_ALVEOLAR_RHABDOMYOSARCOMA_DN	0.00128866	0.0323518	0.374257	1.81741	0	313
GSE30083_SP2_VS_SP3_THYMOCYTE_UP	0.00304878	0.0323518	0.442527	1.81607	1	87
OUELLET_OVARIAN_CANCER_INVASIVE_VS_LMP_UP	0.00155039	0.0323518	0.430549	1.81565	0	106
GO_ELECTRON_CARRIER_ACTIVITY	0.00312012	0.0323518	0.447304	1.81479	1	82
GSE40274_CTRL_VS_IRF4_TRANSDUCED_ACTIVATED_CD4_TCELL_UP	0.00148588	0.0323518	0.418225	1.81461	0	132
PID_LIS1_PATHWAY	0.00862069	0.0598038	0.593402	1.8122	4	21
GNF2_MCL1	0.00164204	0.0323518	0.482711	1.80877	0	51
GO_CYTOCHROME_COMPLEX	0.00714286	0.0524058	0.630694	1.80785	3	17
MODULE_87	0.00327869	0.0323518	0.502168	1.8076	1	41
GO_PYRIMIDINE_NUCLEOSIDE_TRIPHOSPHATE_METABOLIC_PROCESS	0.00537634	0.0430333	0.623037	1.80705	2	18
MODULE_149	0.00508475	0.0412574	0.527019	1.80669	2	34
MODULE_321	0.00312012	0.0323518	0.445284	1.8066	1	82
CHIARADONNA_NEOPLASTIC_TRANSFORMATION_KRAS_CDC25_UP	0.00819672	0.057914	0.505723	1.80656	4	39
GSE40274_CTRL_VS_FOXP3_AND_GATA1_TRANSDUCED_ACTIVATED_CD4_TCELL_DN	0.00153846	0.0323518	0.433677	1.80606	0	98
GO_PYRIMIDINE_NUCLEOSIDE_TRIPHOSPHATE_BIOSYNTHETIC_PROCESS	0.00719424	0.0526384	0.643348	1.80603	3	16
MORF_PPP6C	0.00309119	0.0323518	0.440293	1.80531	1	90
BRUNO_HEMATOPOIESIS	0.00164474	0.0323518	0.480386	1.80527	0	53
SAGIV_CD24_TARGETS_DN	0.00501672	0.0411077	0.546078	1.80516	2	28
MELLMAN_TUT1_TARGETS_DN	0.00499168	0.0410601	0.534854	1.80514	2	31
LU_EZH2_TARGETS_UP	0.00138122	0.0323518	0.394359	1.80513	0	181
GSE9650_EFFECTOR_VS_MEMORY_CD8_TCELL_UP	0.00142045	0.0323518	0.399721	1.80449	0	168
UROSEVIC_RESPONSE_TO_IMIQUIMOD	0.00891266	0.0611812	0.651489	1.80369	4	15
GSE17721_0.5H_VS_12H_CPG_BMDC_UP	0.0013986	0.0323518	0.396656	1.80321	0	173
GNF2_SELL	0.00807754	0.0572534	0.495285	1.80112	4	42
GSE33424_CD161_HIGH_VS_INT_CD8_TCELL_DN	0.00147275	0.0323518	0.409539	1.80011	0	143
GO_NON_CANONICAL_WNT_SIGNALING_PATHWAY	0.00154799	0.0323518	0.434513	1.79978	0	94
GNF2_RAN	0.00311526	0.0323518	0.443001	1.79947	1	84
GSE22935_WT_VS_MYD88_KO_MACROPHAGE_48H_MBOVIS_BCG_STIM_DN	0.00142653	0.0323518	0.399127	1.79934	0	162
FARMER_BREAST_CANCER_CLUSTER_1	0.00670017	0.0503171	0.563689	1.79914	3	25
GNF2_MYD88	0.00165563	0.0323518	0.480108	1.79912	0	54
GSE40666_NAIVE_VS_EFFECTOR_CD8_TCELL_WITH_IFNA_STIM_90MIN_UP	0.00146628	0.0323518	0.410237	1.79895	0	140
RAHMAN_TP53_TARGETS_PHOSPHORYLATED	0.00862069	0.0598038	0.588529	1.79732	4	21
MORF_DAP3	0.00138696	0.0323518	0.391822	1.79656	0	188
GSE21033_CTRL_VS_POLYIC_STIM_DC_24H_DN	0.0015456	0.0323518	0.428201	1.79649	0	103
GNF2_S100A4	0.00495868	0.040965	0.510988	1.79644	2	36
GO_PROTEIN_TARGETING	0.00127065	0.0323518	0.367509	1.79571	0	333
GO_ATP_BIOSYNTHETIC_PROCESS	0.00654664	0.0493304	0.545259	1.79557	3	27
GSE17721_ALL_VS_24H_PAM3CSK4_BMDC_UP	0.00144509	0.0323518	0.400958	1.79372	0	156
GO_ANTIGEN_RECEPTOR_MEDIATED_SIGNALING_PATHWAY	0.00151057	0.0323518	0.414868	1.79332	0	129
GSE3720_UNSTIM_VS_PMA_STIM_VD2_GAMMADELTA_TCELL_UP	0.00145985	0.0323518	0.404083	1.79323	0	152
GO_CYTOKINE_MEDIATED_SIGNALING_PATHWAY	0.00136054	0.0323518	0.379483	1.7922	0	248
GSE23568_ID3_TRANSDUCED_VS_ID3_KO_CD8_TCELL_UP	0.00145138	0.0323518	0.400445	1.79206	0	159
GO_RESPONSE_TO_XENOBIOTIC_STIMULUS	0.00830565	0.0584982	0.505403	1.79033	4	38
MORF_SART1	0.00323625	0.0323518	0.46817	1.78945	1	61
GO_RESPONSE_TO_CORTICOSTEROID	0.00309598	0.0323518	0.431855	1.78877	1	94
GSE28737_BCL6_HET_VS_BCL6_KO_FOLLICULAR_BCELL_DN	0.00146628	0.0323518	0.409199	1.78829	0	138
ALONSO_METASTASIS_UP	0.00145985	0.0323518	0.403176	1.78821	0	151
MORF_PRDX3	0.00312012	0.0323518	0.440683	1.78793	1	82
GSE15930_NAIVE_VS_72H_IN_VITRO_STIM_IL12_CD8_TCELL_DN	0.00140845	0.0323518	0.392836	1.78655	0	175
GSE41867_NAIVE_VS_DAY8_LCMV_ARMSTRONG_EFFECTOR_CD8_TCELL_UP	0.00147059	0.0323518	0.407919	1.78646	0	139
BURTON_ADIPOGENESIS_8	0.00317965	0.0323518	0.463389	1.78643	1	62
ROSS_AML_WITH_CBFB_MYH11_FUSION	0.00495868	0.040965	0.507688	1.78483	2	36
GO_MITOCHONDRION_ORGANIZATION	0.00124224	0.0323518	0.355575	1.78479	0	448
WANG_TUMOR_INVASIVENESS_UP	0.00127714	0.0323518	0.365918	1.78377	0	323
GO_CATION_TRANSMEMBRANE_TRANSPORTER_ACTIVITY	0.00137174	0.0323518	0.380276	1.78374	0	235
GO_ERYTHROCYTE_HOMEOSTASIS	0.0016129	0.0323518	0.471136	1.78172	0	56
GO_POSITIVE_REGULATION_OF_CALCIUM_ION_TRANSPORT_INTO_CYTOSOL	0.00689655	0.0511883	0.576809	1.78144	3	22
KEEN_RESPONSE_TO_ROSIGLITAZONE_UP	0.00675676	0.0505717	0.54018	1.78078	3	29
GO_ANTIOXIDANT_ACTIVITY	0.00807754	0.0572534	0.489513	1.78013	4	42
VECCHI_GASTRIC_CANCER_ADVANCED_VS_EARLY_DN	0.00321027	0.0323518	0.469236	1.77974	1	58
KAECH_DAY8_EFF_VS_MEMORY_CD8_TCELL_UP	0.0013986	0.0323518	0.391469	1.77963	0	173
GO_REGULATION_OF_CELLULAR_RESPIRATION	0.00719424	0.0526384	0.633925	1.77958	3	16
LANDIS_BREAST_CANCER_PROGRESSION_UP	0.00668896	0.0502612	0.537882	1.77806	3	28
GSE42724_NAIVE_VS_B1_BCELL_DN	0.00143678	0.0323518	0.396079	1.77765	0	160
REACTOME_CLASS_A1_RHODOPSIN_LIKE_RECEPTORS	0.00465839	0.039582	0.43966	1.77701	2	79
ZHAN_LATE_DIFFERENTIATION_GENES_UP	0.00675676	0.0505717	0.538965	1.77678	3	29
GO_ESTABLISHMENT_OF_PROTEIN_LOCALIZATION_TO_ORGANELLE	0.00131406	0.0323518	0.367646	1.77504	0	306
RB_DN.V1_DN	0.00311526	0.0323518	0.441436	1.77459	1	77
CHAUHAN_RESPONSE_TO_METHOXYESTRADIOL_DN	0.00465116	0.039582	0.433823	1.77443	2	89
GSE6674_UNSTIM_VS_ANTI_IGM_STIM_BCELL_DN	0.00689655	0.0511883	0.574398	1.77399	3	22
GSE13522_WT_VS_IFNAR_KO_SKIN_DN	0.00148368	0.0323518	0.407841	1.77385	0	137
GSE3720_UNSTIM_VS_LPS_STIM_VD2_GAMMADELTA_TCELL_UP	0.00145773	0.0323518	0.40186	1.7738	0	145
GSE6090_UNSTIM_VS_DC-SIGN_STIM_DC_DN	0.00807754	0.0572534	0.486493	1.77359	4	43
GO_MITOCHONDRIAL_TRANSPORT	0.00148588	0.0323518	0.407712	1.7727	0	135
GSE40443_INDUCED_VS_TOTAL_TREG_DN	0.00146628	0.0323518	0.401072	1.77236	0	147
SWEET_LUNG_CANCER_KRAS_UP	0.00126904	0.0323518	0.361131	1.772	0	353
EIF4E_UP	0.00317965	0.0323518	0.459519	1.77151	1	62
GSE13547_CTRL_VS_ANTI_IGM_STIM_BCELL_12H_DN	0.00146843	0.0323518	0.402409	1.7715	0	144
GO_MITOCHONDRIAL_MATRIX	0.00128535	0.0323518	0.3635	1.77059	0	327
GSE22886_NAIVE_VS_IGM_MEMORY_BCELL_DN	0.00142653	0.0323518	0.392612	1.76996	0	162
GSE22935_UNSTIM_VS_48H_MBOVIS_BCG_STIM_MYD88_KO_MACROPHAGE_DN	0.00311526	0.0323518	0.435614	1.76923	1	83
DOANE_BREAST_CANCER_ESR1_DN	0.00719424	0.0526384	0.630005	1.76857	3	16
GO_PROTEASOME_ACCESSORY_COMPLEX	0.00680272	0.0507171	0.56069	1.76836	3	24
GSE339_CD4POS_VS_CD8POS_DC_IN_CULTURE_DN	0.001443	0.0323518	0.395203	1.7682	0	158
REACTOME_GPCR_LIGAND_BINDING	0.0030722	0.0323518	0.424866	1.76649	1	97
GSE17721_PAM3CSK4_VS_GADIQUIMOD_16H_BMDC_DN	0.00144509	0.0323518	0.393885	1.76208	0	156
GO_PYRIMIDINE_CONTAINING_COMPOUND_BIOSYNTHETIC_PROCESS	0.00676819	0.0506015	0.529194	1.76181	3	30
GO_ORGANIC_CYCLIC_COMPOUND_CATABOLIC_PROCESS	0.00128535	0.0323518	0.362613	1.76178	0	315
V$GATA_C	0.00155521	0.0323518	0.4181	1.76023	0	105
V$GATA_Q6	0.00157978	0.0323518	0.448782	1.75916	0	68
MODULE_226	0.00680272	0.0507171	0.557745	1.75907	3	24
GO_CATION_TRANSPORT	0.00127226	0.0323518	0.359876	1.75902	0	334
LIU_SMARCA4_TARGETS	0.00818331	0.057911	0.533897	1.75815	4	27
GSE34156_NOD2_LIGAND_VS_TLR1_TLR2_LIGAND_6H_TREATED_MONOCYTE_DN	0.00148588	0.0323518	0.4043	1.75787	0	135
GSE24634_TREG_VS_TCONV_POST_DAY10_IL4_CONVERSION_DN	0.00143885	0.0323518	0.392317	1.75687	0	157
VALK_AML_CLUSTER_5	0.00689655	0.0511883	0.568218	1.7549	3	22
GSE10325_BCELL_VS_MYELOID_DN	0.00147059	0.0323518	0.397318	1.75459	0	148
GO_POSITIVE_REGULATION_OF_RELEASE_OF_SEQUESTERED_CALCIUM_ION_INTO_CYTOSOL	0.00896057	0.0613345	0.604807	1.75418	4	18
GO_ANTIGEN_PROCESSING_AND_PRESENTATION	0.00147059	0.0323518	0.396899	1.75273	0	148
GSE20727_CTRL_VS_DNFB_ALLERGEN_TREATED_DC_DN	0.00307692	0.0323518	0.41465	1.75217	1	108
GSE21063_CTRL_VS_ANTI_IGM_STIM_BCELL_NFATC1_KO_16H_UP	0.00305344	0.0323518	0.410615	1.75214	1	119
GO_HOMEOSTASIS_OF_NUMBER_OF_CELLS_WITHIN_A_TISSUE	0.0120482	0.0757971	0.578975	1.75201	6	20
GNF2_FGR	0.00668896	0.0502612	0.529418	1.75009	3	28
ZHANG_INTERFERON_RESPONSE	0.0123675	0.0772607	0.589117	1.74979	6	19
GSE5099_DAY3_VS_DAY7_MCSF_TREATED_MACROPHAGE_UP	0.00147275	0.0323518	0.398051	1.74961	0	143
HALLMARK_MYC_TARGETS_V1	0.00140647	0.0323518	0.38115	1.74953	0	197
GO_INORGANIC_ION_TRANSMEMBRANE_TRANSPORT	0.00138696	0.0323518	0.3759	1.74926	0	219
GSE15330_LYMPHOID_MULTIPOTENT_VS_MEGAKARYOCYTE_ERYTHROID_PROGENITOR_IKAROS_KO_DN	0.00147059	0.0323518	0.39541	1.74908	0	150
GO_RRNA_METABOLIC_PROCESS	0.00137363	0.0323518	0.371596	1.74705	0	240
REACTOME_REGULATION_OF_MITOTIC_CELL_CYCLE	0.0046729	0.039582	0.437833	1.74669	2	74
MENSSEN_MYC_TARGETS	0.00165017	0.0323518	0.471183	1.74627	0	49
GO_REGULATION_OF_RELEASE_OF_CYTOCHROME_C_FROM_MITOCHONDRIA	0.00677966	0.0506015	0.509009	1.74495	3	34
DAIRKEE_TERT_TARGETS_UP	0.00132979	0.0323518	0.364234	1.74484	0	281
GSE6269_HEALTHY_VS_STAPH_PNEUMO_INF_PBMC_DN	0.00295858	0.0323518	0.401002	1.74356	1	133
GO_PYRIMIDINE_NUCLEOSIDE_BIOSYNTHETIC_PROCESS	0.0103448	0.0678578	0.564377	1.74304	5	22
GSE33424_CD161_HIGH_VS_INT_CD8_TCELL_UP	0.00145138	0.0323518	0.389319	1.74227	0	159
TIEN_INTESTINE_PROBIOTICS_2HR_UP	0.0120482	0.0757971	0.575664	1.74199	6	20
REACTOME_INTERFERON_ALPHA_BETA_SIGNALING	0.00819672	0.057914	0.487643	1.74197	4	39
HALLMARK_REACTIVE_OXIGEN_SPECIES_PATHWAY	0.00807754	0.0572534	0.477732	1.74165	4	43
BRACHAT_RESPONSE_TO_CAMPTOTHECIN_DN	0.00830565	0.0584982	0.491653	1.74162	4	38
GSE9960_GRAM_NEG_VS_GRAM_POS_SEPSIS_PBMC_UP	0.00149031	0.0323518	0.401263	1.74135	0	131
GO_NUCLEOSIDE_PHOSPHATE_BIOSYNTHETIC_PROCESS	0.00303951	0.0323518	0.405858	1.74111	1	123
GSE24634_TREG_VS_TCONV_POST_DAY7_IL4_CONVERSION_DN	0.00147275	0.0323518	0.396072	1.74091	0	143
GO_COFACTOR_METABOLIC_PROCESS	0.00138313	0.0323518	0.371684	1.74088	0	234
HALLMARK_FATTY_ACID_METABOLISM	0.0030349	0.0323518	0.407731	1.74028	1	117
MORF_CSNK2B	0.001321	0.0323518	0.362876	1.74026	0	278
GO_VIRAL_LIFE_CYCLE	0.00137363	0.0323518	0.369847	1.73883	0	240
RADMACHER_AML_PROGNOSIS	0.00162866	0.0323518	0.471939	1.73868	0	46
KAYO_AGING_MUSCLE_DN	0.00304414	0.0323518	0.417848	1.73812	1	96
ICHIBA_GRAFT_VERSUS_HOST_DISEASE_35D_UP	0.00306279	0.0323518	0.414446	1.73797	1	102
GSE2405_HEAT_KILLED_VS_LIVE_A_PHAGOCYTOPHILUM_STIM_NEUTROPHIL_9H_UP	0.00142248	0.0323518	0.384302	1.73796	0	170
GSE4590_SMALL_VS_LARGE_PRE_BCELL_DN	0.00307692	0.0323518	0.411045	1.73694	1	108
ONGUSAHA_TP53_TARGETS	0.0083612	0.0587348	0.525276	1.73639	4	28
GSE29617_DAY3_VS_DAY7_TIV_FLU_VACCINE_PBMC_2008_UP	0.00304878	0.0323518	0.408977	1.73631	1	113
GSE24634_IL4_VS_CTRL_TREATED_NAIVE_CD4_TCELL_DAY3_DN	0.00295858	0.0323518	0.398923	1.73452	1	133
GO_REGULATION_OF_MITOCHONDRIAL_MEMBRANE_PERMEABILITY_INVOLVED_IN_APOPTOTIC_PROCESS	0.0125	0.0777255	0.604827	1.7337	6	17
MODULE_92	0.00325203	0.0323518	0.472615	1.73316	1	45
HWANG_PROSTATE_CANCER_MARKERS	0.0120482	0.0757971	0.572687	1.73298	6	20
REACTOME_PEPTIDE_LIGAND_BINDING_RECEPTORS	0.00165563	0.0323518	0.469402	1.73239	0	47
GO_MYELOID_CELL_HOMEOSTASIS	0.00157978	0.0323518	0.441947	1.73237	0	68
GO_REACTIVE_OXYGEN_SPECIES_METABOLIC_PROCESS	0.00164474	0.0323518	0.460894	1.73202	0	53
GSE18281_CORTICAL_VS_MEDULLARY_THYMOCYTE_UP	0.00147059	0.0323518	0.391396	1.73132	0	150
KEGG_DRUG_METABOLISM_OTHER_ENZYMES	0.0120482	0.0757971	0.572079	1.73114	6	20
GO_T_CELL_RECEPTOR_SIGNALING_PATHWAY	0.00309119	0.0323518	0.409859	1.73067	1	107
GSE17721_PAM3CSK4_VS_GADIQUIMOD_24H_BMDC_UP	0.00147275	0.0323518	0.393235	1.72844	0	143
GO_RESPONSE_TO_ATP	0.0120482	0.0757971	0.570857	1.72745	6	20
GSE17721_PAM3CSK4_VS_CPG_12H_BMDC_UP	0.0014556	0.0323518	0.387484	1.72681	0	154
LEE_NEURAL_CREST_STEM_CELL_UP	0.00164204	0.0323518	0.460831	1.72678	0	51
TOOKER_GEMCITABINE_RESISTANCE_UP	0.00323625	0.0323518	0.451698	1.72649	1	61
GO_ENZYME_INHIBITOR_ACTIVITY	0.00142248	0.0323518	0.382919	1.72644	0	166
GO_PHAGOSOME_MATURATION	0.00981997	0.0657697	0.523784	1.72485	5	27
GO_NEGATIVE_REGULATION_OF_VIRAL_GENOME_REPLICATION	0.00677966	0.0506015	0.502757	1.72351	3	34
SERVITJA_ISLET_HNF1A_TARGETS_UP	0.0015949	0.0323518	0.440672	1.72351	0	67
YAGI_AML_FAB_MARKERS	0.00295858	0.0323518	0.395751	1.72073	1	133
GSE27786_LSK_VS_LIN_NEG_CELL_DN	0.00297177	0.0323518	0.396449	1.72013	1	132
BYSTRYKH_HEMATOPOIESIS_STEM_CELL_QTL_CIS	0.00458716	0.0395063	0.411405	1.71972	2	100
MODULE_76	0.00330033	0.0323518	0.464005	1.71967	1	49
LIU_VAV3_PROSTATE_CARCINOGENESIS_UP	0.00330033	0.0323518	0.463819	1.71898	1	48
GSE13522_WT_VS_IFNAR_KO_SKING_T_CRUZI_Y_STRAIN_INF_UP	0.0030303	0.0323518	0.40072	1.71845	1	121
KAECH_DAY15_EFF_VS_MEMORY_CD8_TCELL_UP	0.00147059	0.0323518	0.388947	1.71762	0	148
GSE22886_NAIVE_BCELL_VS_NEUTROPHIL_UP	0.00146843	0.0323518	0.390151	1.71754	0	144
WANG_IMMORTALIZED_BY_HOXA9_AND_MEIS1_DN	0.0120482	0.0757971	0.567574	1.71751	6	20
GSE16385_IFNG_TNF_VS_IL4_STIM_MACROPHAGE_ROSIGLITAZONE_TREATED_DN	0.00146199	0.0323518	0.386477	1.71745	0	153
GSE37532_WT_VS_PPARG_KO_LN_TREG_DN	0.0125899	0.0780834	0.611793	1.71745	6	16
GSE35685_CD34POS_CD38NEG_VS_CD34POS_CD10NEG_CD62LPOS_BONE_MARROW_UP	0.00138504	0.0323518	0.375003	1.71729	0	183
GO_IRON_ION_TRANSPORT	0.00991736	0.0662892	0.48842	1.71709	5	36
LEE_LIVER_CANCER_MYC_UP	0.00830565	0.0584982	0.484646	1.7168	4	38
GO_RESPONSE_TO_TRANSITION_METAL_NANOPARTICLE	0.00457317	0.0394875	0.418256	1.71647	2	87
GSE17301_CTRL_VS_48H_ACD3_ACD28_IFNA2_STIM_CD8_TCELL_UP	0.00141443	0.0323518	0.37883	1.71558	0	172
GO_PEPTIDASE_REGULATOR_ACTIVITY	0.0046729	0.039582	0.426587	1.7149	2	77
GSE5542_IFNG_VS_IFNA_TREATED_EPITHELIAL_CELLS_6H_DN	0.00459418	0.0395102	0.4088	1.7143	2	102
GO_REGULATION_OF_SMOOTH_MUSCLE_CONTRACTION	0.0123675	0.0772607	0.57683	1.7133	6	19
GO_POSITIVE_REGULATION_OF_LIGASE_ACTIVITY	0.00457317	0.0394875	0.408675	1.71313	2	101
REACTOME_SYNTHESIS_OF_DNA	0.00458716	0.0395063	0.417592	1.71286	2	88
HALLMARK_INTERFERON_GAMMA_RESPONSE	0.0014245	0.0323518	0.380088	1.7126	0	167
GSE30962_ACUTE_VS_CHRONIC_LCMV_PRIMARY_INF_CD8_TCELL_UP	0.00147059	0.0323518	0.38764	1.71184	0	148
GSE42088_UNINF_VS_LEISHMANIA_INF_DC_4H_DN	0.00145349	0.0323518	0.383636	1.71181	0	155
MORF_HDAC1	0.00136612	0.0323518	0.362537	1.71161	0	249
GSE29618_MONOCYTE_VS_PDC_DAY7_FLU_VACCINE_UP	0.00141844	0.0323518	0.379402	1.71158	0	164
GSE34156_UNTREATED_VS_24H_NOD2_LIGAND_TREATED_MONOCYTE_DN	0.00147059	0.0323518	0.386923	1.71154	0	150
GO_TRANSMEMBRANE_TRANSPORTER_ACTIVITY	0.00126422	0.0323518	0.344719	1.70953	0	395
HOLLEMAN_ASPARAGINASE_RESISTANCE_B_ALL_UP	0.0101523	0.067137	0.547423	1.70929	5	23
BAE_BRCA1_TARGETS_UP	0.00322581	0.0323518	0.451848	1.70877	1	56
GO_PYRIMIDINE_RIBONUCLEOTIDE_METABOLIC_PROCESS	0.0107527	0.0697803	0.58912	1.70868	5	18
BOYAULT_LIVER_CANCER_SUBCLASS_G1_DN	0.00981997	0.0657697	0.518838	1.70856	5	27
GO_ANTIGEN_PROCESSING_AND_PRESENTATION_OF_PEPTIDE_ANTIGEN	0.0029985	0.0323518	0.394659	1.7085	1	130
LEIN_LOCALIZED_TO_PROXIMAL_DENDRITES	0.0125899	0.0780834	0.608489	1.70817	6	16
GCM_PFN1	0.00164204	0.0323518	0.455713	1.7076	0	51
GAVIN_FOXP3_TARGETS_CLUSTER_T7	0.00458716	0.0395063	0.415924	1.70602	2	88
MORF_RAB5A	0.00465116	0.039582	0.415645	1.70489	2	91
GO_NEGATIVE_REGULATION_OF_CANONICAL_WNT_SIGNALING_PATHWAY	0.00460829	0.0395102	0.409885	1.7042	2	97
GO_POSITIVE_REGULATION_OF_CANONICAL_WNT_SIGNALING_PATHWAY	0.00465839	0.039582	0.420889	1.70114	2	79
GO_GLUTATHIONE_TRANSFERASE_ACTIVITY	0.0107527	0.0697803	0.586335	1.7006	5	18
GUENTHER_GROWTH_SPHERICAL_VS_ADHERENT_DN	0.0141343	0.0843578	0.572439	1.70026	7	19
MARSON_FOXP3_TARGETS_UP	0.00316957	0.0323518	0.444736	1.69932	1	59
GSE411_UNSTIM_VS_100MIN_IL6_STIM_MACROPHAGE_UP	0.00142248	0.0323518	0.376852	1.69908	0	166
GSE9960_HEALTHY_VS_GRAM_NEG_SEPSIS_PBMC_DN	0.00146628	0.0323518	0.384473	1.69901	0	147
GO_REGULATION_OF_PROTEIN_UBIQUITINATION_INVOLVED_IN_UBIQUITIN_DEPENDENT_PROTEIN_CATABOLIC_PROCESS	0.0046225	0.0395663	0.41216	1.69878	2	92
GSE5542_IFNG_VS_IFNA_TREATED_EPITHELIAL_CELLS_24H_DN	0.00463679	0.039582	0.404825	1.69841	2	103
BURTON_ADIPOGENESIS_5	0.00457317	0.0394875	0.405087	1.69808	2	101
OHGUCHI_LIVER_HNF4A_TARGETS_UP	0.0172414	0.0966891	0.549761	1.6979	9	22
GO_FC_RECEPTOR_SIGNALING_PATHWAY	0.0014245	0.0323518	0.376943	1.69761	0	161
MODULE_212	0.0013986	0.0323518	0.364807	1.69744	0	221
GO_CATION_TRANSPORTING_ATPASE_ACTIVITY	0.00995025	0.0664426	0.480809	1.69707	5	37
REACTOME_PHASE_II_CONJUGATION	0.0101695	0.0671689	0.495022	1.697	5	34
GSE42088_2H_VS_24H_LEISHMANIA_INF_DC_UP	0.00141844	0.0323518	0.375901	1.69578	0	164
GSE360_T_GONDII_VS_M_TUBERCULOSIS_DC_DN	0.0030303	0.0323518	0.39587	1.69541	1	120
GNF2_MSN	0.0102041	0.0672301	0.53746	1.69509	5	24
GSE34205_HEALTHY_VS_FLU_INF_INFANT_PBMC_UP	0.0030349	0.0323518	0.393187	1.69423	1	128
GSE22886_NAIVE_CD4_TCELL_VS_48H_ACT_TH1_DN	0.00140647	0.0323518	0.372154	1.69381	0	177
GSE37605_TREG_VS_TCONV_C57BL6_FOXP3_IRES_GFP_DN	0.00305344	0.0323518	0.39548	1.69377	1	122
GSE17301_ACD3_ACD28_VS_ACD3_ACD28_AND_IFNA5_STIM_CD8_TCELL_DN	0.00145985	0.0323518	0.381635	1.69361	0	152
GSE2585_CTEC_VS_MTEC_THYMUS_UP	0.00297177	0.0323518	0.390285	1.69339	1	132
GSE13522_WT_VS_IFNG_KO_SKING_T_CRUZI_Y_STRAIN_INF_UP	0.0165289	0.0940342	0.495219	1.69289	9	32
GO_MYELIN_SHEATH	0.00306279	0.0323518	0.397658	1.69131	1	115
GO_PYRIMIDINE_RIBONUCLEOSIDE_METABOLIC_PROCESS	0.0141343	0.0843578	0.569377	1.69116	7	19
GSE16266_CTRL_VS_HEATSHOCK_AND_LPS_STIM_MEF_UP	0.00140647	0.0323518	0.371541	1.69102	0	177
MCLACHLAN_DENTAL_CARIES_UP	0.00143678	0.0323518	0.376723	1.69078	0	160
GO_TRIVALENT_INORGANIC_CATION_TRANSPORT	0.0100334	0.0668313	0.511274	1.69011	5	28
GO_FERRIC_IRON_TRANSPORT	0.0100334	0.0668313	0.511274	1.69011	5	28
MODULE_436	0.00315956	0.0323518	0.431127	1.68996	1	68
GSE2128_C57BL6_VS_NOD_THYMOCYTE_MIMETOPE_NEGATIVE_SELECTION_DN	0.00143885	0.0323518	0.377304	1.68964	0	157
GSE3203_WT_VS_IFNAR1_KO_INFLUENZA_INFECTED_LN_BCELL_DN	0.0046729	0.039582	0.420281	1.68955	2	77
GO_G_PROTEIN_COUPLED_RECEPTOR_ACTIVITY	0.00457317	0.0394875	0.40304	1.6895	2	101
MORF_CCNI	0.00457317	0.0394875	0.411636	1.6893	2	87
GSE33162_HDAC3_KO_VS_HDAC3_KO_MACROPHAGE_DN	0.0014245	0.0323518	0.374786	1.68928	0	165
ANASTASSIOU_CANCER_MESENCHYMAL_TRANSITION_SIGNATURE	0.0172414	0.0966891	0.54653	1.68792	9	22
CHOW_RASSF1_TARGETS_DN	0.0100503	0.0668582	0.528307	1.68621	5	25
GCNP_SHH_UP_LATE.V1_DN	0.00615385	0.0471677	0.398523	1.6861	3	109
GO_PYRIMIDINE_NUCLEOTIDE_METABOLIC_PROCESS	0.0115702	0.0739733	0.47949	1.6857	6	36
GO_RIBOSOMAL_LARGE_SUBUNIT_BIOGENESIS	0.00961538	0.0647562	0.460981	1.68567	5	44
REACTOME_TRANSFERRIN_ENDOCYTOSIS_AND_RECYCLING	0.0107527	0.0697803	0.581166	1.68561	5	18
GO_ORGANIC_ACID_BINDING	0.00462963	0.0395663	0.407047	1.68502	2	93
GO_TRANSMEMBRANE_TRANSPORT	0.00123457	0.0323518	0.334639	1.68371	0	466
GSE41087_WT_VS_FOXP3_MUT_ANTI_CD3_CD28_STIM_CD4_TCELL_DN	0.00143678	0.0323518	0.374908	1.68263	0	160
GO_POSITIVE_REGULATION_OF_INTERLEUKIN_12_PRODUCTION	0.0155172	0.0898455	0.550629	1.68158	8	21
GSE27670_CTRL_VS_LMP1_TRANSDUCED_GC_BCELL_UP	0.00145985	0.0323518	0.379105	1.68144	0	151
REACTOME_APOPTOSIS	0.0030303	0.0323518	0.392084	1.68142	1	121
TAKEDA_TARGETS_OF_NUP98_HOXA9_FUSION_8D_UP	0.0046729	0.039582	0.416842	1.67997	2	78
GO_REGULATION_OF_CALCIUM_ION_TRANSPORT_INTO_CYTOSOL	0.0113086	0.0726709	0.461908	1.67974	6	42
DANG_MYC_TARGETS_UP	0.00302115	0.0323518	0.388466	1.67919	1	129
MORF_DAP	0.00623053	0.0472947	0.420803	1.67875	3	74
GNF2_TNFSF10	0.0136054	0.0821548	0.532079	1.67812	7	24
GSE10500_ARTHRITIC_SYNOVIAL_FLUID_VS_HEALTHY_MACROPHAGE_UP	0.00457317	0.0394875	0.395423	1.67783	2	112
HOOI_ST7_TARGETS_DN	0.00322581	0.0323518	0.443648	1.67776	1	56
BIOCARTA_CDC42RAC_PATHWAY	0.0160428	0.0918545	0.606001	1.67776	8	15
GSE46606_IRF4HIGH_VS_WT_CD40L_IL2_IL5_DAY3_STIMULATED_BCELL_DN	0.00460123	0.0395102	0.396103	1.67772	2	111
LINDGREN_BLADDER_CANCER_CLUSTER_1_UP	0.00623053	0.0472947	0.41298	1.67753	3	84
REACTOME_TRANSPORT_OF_GLUCOSE_AND_OTHER_SUGARS_BILE_SALTS_AND_ORGANIC_ACIDS_METAL_IONS_AND_AMINE_COMPOUNDS	0.0152542	0.0886296	0.491784	1.6767	8	33
GO_COP9_SIGNALOSOME	0.00981997	0.0657697	0.509034	1.67628	5	27
GO_RESPONSE_TO_INTERFERON_GAMMA	0.0015949	0.0323518	0.428577	1.67621	0	67
GSE10325_LUPUS_CD4_TCELL_VS_LUPUS_BCELL_DN	0.0030581	0.0323518	0.394777	1.6762	1	114
MISSIAGLIA_REGULATED_BY_METHYLATION_UP	0.00457317	0.0394875	0.408297	1.6756	2	87
GO_COENZYME_BIOSYNTHETIC_PROCESS	0.00462963	0.0395663	0.404731	1.67543	2	93
GO_CELLULAR_RESPONSE_TO_CYTOKINE_STIMULUS	0.00127065	0.0323518	0.341864	1.67442	0	341
GO_POSITIVE_REGULATION_OF_RELEASE_OF_CYTOCHROME_C_FROM_MITOCHONDRIA	0.0172117	0.0966891	0.553273	1.67424	9	20
GSE22935_WT_VS_MYD88_KO_MACROPHAGE_UP	0.00142045	0.0323518	0.370755	1.67373	0	168
GO_ACTIVATION_OF_IMMUNE_RESPONSE	0.00131406	0.0323518	0.348236	1.67353	0	283
HALLMARK_PEROXISOME	0.00470958	0.0397417	0.413438	1.67346	2	80
GSE13547_CTRL_VS_ANTI_IGM_STIM_BCELL_2H_DN	0.00621118	0.0472551	0.410962	1.67259	3	85
GSE36392_EOSINOPHIL_VS_NEUTROPHIL_IL25_TREATED_LUNG_DN	0.00142045	0.0323518	0.370395	1.6721	0	168
GO_REGULATION_OF_RELEASE_OF_SEQUESTERED_CALCIUM_ION_INTO_CYTOSOL	0.0115702	0.0739733	0.475387	1.67128	6	36
GSE24142_EARLY_THYMIC_PROGENITOR_VS_DN2_THYMOCYTE_FETAL_UP	0.00145349	0.0323518	0.374546	1.67125	0	155
GSE10239_NAIVE_VS_MEMORY_CD8_TCELL_DN	0.00305344	0.0323518	0.391568	1.67086	1	119
BERENJENO_TRANSFORMED_BY_RHOA_DN	0.00134228	0.0323518	0.351341	1.67086	0	259
MODULE_64	0.00139082	0.0323518	0.360544	1.66823	0	206
GSE33162_UNTREATED_VS_4H_LPS_STIM_HDAC3_KO_MACROPHAGE_UP	0.00140647	0.0323518	0.366378	1.66752	0	177
ZHANG_TLX_TARGETS_UP	0.00470958	0.0397417	0.411951	1.66744	2	80
DANG_MYC_TARGETS_DN	0.0116473	0.0743454	0.514709	1.66643	6	26
GSE2770_IL4_ACT_VS_ACT_CD4_TCELL_2H_UP	0.0013986	0.0323518	0.36645	1.66589	0	173
MODULE_164	0.0172414	0.0966891	0.539274	1.66551	9	22
GSE23505_IL6_IL1_IL23_VS_IL6_IL1_TGFB_TREATED_CD4_TCELL_UP	0.00297177	0.0323518	0.382952	1.6655	1	136
TARTE_PLASMA_CELL_VS_PLASMABLAST_DN	0.001321	0.0323518	0.346744	1.66531	0	290
GO_PROTON_TRANSPORTING_TWO_SECTOR_ATPASE_COMPLEX_PROTON_TRANSPORTING_DOMAIN	0.0160714	0.0919005	0.580747	1.66468	8	17
LUCAS_HNF4A_TARGETS_UP	0.013289	0.0807546	0.469885	1.66451	7	38
GSE18893_TCONV_VS_TREG_24H_TNF_STIM_DN	0.00297619	0.0323518	0.380087	1.66438	1	141
MODULE_121	0.00162602	0.0323518	0.442306	1.66401	0	52
GSE24634_TREG_VS_TCONV_POST_DAY3_IL4_CONVERSION_DN	0.00142653	0.0323518	0.368743	1.66348	0	163
GCM_APEX1	0.00615385	0.0471677	0.392928	1.66248	3	110
GNF2_HLA-C	0.0149254	0.0876325	0.470787	1.6617	8	37
GO_NEGATIVE_REGULATION_OF_PROTEIN_MODIFICATION_BY_SMALL_PROTEIN_CONJUGATION_OR_REMOVAL	0.00303951	0.0323518	0.38716	1.6609	1	123
GSE339_CD8POS_VS_CD4CD8DN_DC_IN_CULTURE_UP	0.00141844	0.0323518	0.368021	1.66023	0	164
GSE25085_FETAL_LIVER_VS_FETAL_BM_SP4_THYMIC_IMPLANT_DN	0.00293255	0.0323518	0.375685	1.66017	1	147
GSE24142_ADULT_VS_FETAL_DN3_THYMOCYTE_DN	0.00457317	0.0394875	0.391101	1.65949	2	112
ICHIBA_GRAFT_VERSUS_HOST_DISEASE_D7_UP	0.00623053	0.0472947	0.408566	1.65937	3	83
GO_BETA_TUBULIN_BINDING	0.0101351	0.0670744	0.503243	1.65901	5	29
VIETOR_IFRD1_TARGETS	0.0160714	0.0919005	0.578768	1.659	8	17
GO_PLATELET_MORPHOGENESIS	0.0160714	0.0919005	0.578623	1.65859	8	17
KLEIN_PRIMARY_EFFUSION_LYMPHOMA_DN	0.0117057	0.0744477	0.464094	1.65831	6	40
GSE13484_UNSTIM_VS_12H_YF17D_VACCINE_STIM_PBMC_DN	0.00293255	0.0323518	0.375238	1.6582	1	147
BASSO_B_LYMPHOCYTE_NETWORK	0.00301659	0.0323518	0.38476	1.65816	1	126
GO_INTRINSIC_COMPONENT_OF_MITOCHONDRIAL_MEMBRANE	0.0117057	0.0744477	0.463924	1.65771	6	40
GSE3994_WT_VS_PAC1_KO_ACTIVATED_MAST_CELL_UP	0.0046729	0.039582	0.411224	1.65733	2	78
INGRAM_SHH_TARGETS_DN	0.014975	0.0877316	0.477048	1.65691	8	35
IGLESIAS_E2F_TARGETS_UP	0.00615385	0.0471677	0.392075	1.65677	3	108
TAKAO_RESPONSE_TO_UVB_RADIATION_DN	0.00624025	0.0473417	0.408355	1.65677	3	82
GO_POSITIVE_REGULATION_OF_PROTEIN_MODIFICATION_BY_SMALL_PROTEIN_CONJUGATION_OR_REMOVAL	0.0014245	0.0323518	0.367647	1.65654	0	167
GO_NEGATIVE_REGULATION_OF_WNT_SIGNALING_PATHWAY	0.00457317	0.0394875	0.390377	1.65642	2	112
GSE6674_CPG_VS_PL2_3_STIM_BCELL_UP	0.00145985	0.0323518	0.373186	1.65611	0	152
GSE24210_CTRL_VS_IL35_TREATED_TCONV_CD4_TCELL_DN	0.00140647	0.0323518	0.363648	1.65509	0	177
GO_PEPTIDE_RECEPTOR_ACTIVITY	0.0147541	0.0869705	0.463283	1.65495	8	39
GSE39820_TGFBETA1_VS_TGFBETA3_IN_IL6_TREATED_CD4_TCELL_DN	0.0030349	0.0323518	0.384007	1.65468	1	128
LEE_AGING_MUSCLE_DN	0.0101351	0.0670744	0.501636	1.65372	5	29
GO_PIGMENT_GRANULE	0.00623053	0.0472947	0.40692	1.65291	3	84
GO_RESPONSE_TO_METAL_ION	0.00139276	0.0323518	0.361137	1.65271	0	193
REACTOME_HOST_INTERACTIONS_OF_HIV_FACTORS	0.00615385	0.0471677	0.390398	1.65173	3	109
LEE_LIVER_CANCER_CIPROFIBRATE_UP	0.014975	0.0877316	0.475324	1.65092	8	35
GSE39152_BRAIN_VS_SPLEEN_CD103_NEG_MEMORY_CD8_TCELL_DN	0.00141844	0.0323518	0.365911	1.65071	0	164
GSE12366_PLASMA_CELL_VS_NAIVE_BCELL_UP	0.0030349	0.0323518	0.384097	1.65021	1	124
GO_ION_TRANSMEMBRANE_TRANSPORT	0.00127065	0.0323518	0.337784	1.64947	0	325
MODULE_209	0.0131148	0.0801118	0.458178	1.64926	7	41
GSE41176_UNSTIM_VS_ANTI_IGM_STIM_BCELL_1H_DN	0.00142653	0.0323518	0.365377	1.6483	0	163
GSE25147_UNSTIM_VS_HELIOBACTER_PYLORI_LPS_STIM_MKN45_CELL_DN	0.00456621	0.0394875	0.396245	1.64825	2	96
OKAMOTO_LIVER_CANCER_MULTICENTRIC_OCCURRENCE_UP	0.0143369	0.0854148	0.56826	1.64818	7	18
ADDYA_ERYTHROID_DIFFERENTIATION_BY_HEMIN	0.00481541	0.0402538	0.435425	1.64767	2	57
GSE1448_CTRL_VS_ANTI_VALPHA2_DP_THYMOCYTE_DN	0.00297177	0.0323518	0.379538	1.64676	1	132
GO_CHANNEL_REGULATOR_ACTIVITY	0.00825083	0.058204	0.444273	1.64654	4	49
GSE38304_MYC_NEG_VS_POS_GC_BCELL_DN	0.00291545	0.0323518	0.372904	1.646	1	145
ACEVEDO_LIVER_CANCER_WITH_H3K27ME3_UP	0.00465116	0.039582	0.402093	1.64464	2	89
GO_DETOXIFICATION	0.00961538	0.0647562	0.449631	1.64417	5	44
GO_RIBOSOME_BIOGENESIS	0.00131406	0.0323518	0.341903	1.64359	0	285
WILENSKY_RESPONSE_TO_DARAPLADIB	0.014975	0.0877316	0.507651	1.64358	8	26
GSE22886_NAIVE_CD8_TCELL_VS_DC_DN	0.0013986	0.0323518	0.361536	1.64356	0	173
GO_GLYCOSYL_COMPOUND_BIOSYNTHETIC_PROCESS	0.00465116	0.039582	0.401728	1.64315	2	89
DER_IFN_ALPHA_RESPONSE_UP	0.00481541	0.0402538	0.433101	1.64269	2	58
WU_CELL_MIGRATION	0.00617284	0.0471971	0.402726	1.64254	3	86
GSE14415_INDUCED_TREG_VS_FOXP3_KO_INDUCED_TREG_DN	0.00292398	0.0323518	0.371001	1.64254	1	149
GO_ACTIN_MEDIATED_CELL_CONTRACTION	0.0189655	0.103199	0.537719	1.64215	10	21
SNF5_DN.V1_UP	0.00455927	0.0394875	0.385134	1.64201	2	116
GSE2124_CTRL_VS_LYMPHOTOXIN_BETA_TREATED_MLN_UP	0.00780031	0.0556422	0.404696	1.64192	4	82
GSE29618_MONOCYTE_VS_MDC_DAY7_FLU_VACCINE_UP	0.00291121	0.0323518	0.368398	1.64175	1	154
GO_TRANSITION_METAL_ION_TRANSPORT	0.00322061	0.0323518	0.424995	1.64154	1	65
GSE34515_CD16_NEG_VS_POS_MONOCYTE_UP	0.00305344	0.0323518	0.383144	1.64094	1	122
PID_TOLL_ENDOGENOUS_PATHWAY	0.0189655	0.103199	0.537209	1.64059	10	21
MORF_RAD21	0.00141443	0.0323518	0.362128	1.63995	0	172
REACTOME_MUSCLE_CONTRACTION	0.0189655	0.103199	0.536941	1.63977	10	21
GO_ACTIVATION_OF_INNATE_IMMUNE_RESPONSE	0.00140845	0.0323518	0.360557	1.63975	0	175
SCHRAETS_MLL_TARGETS_UP	0.0178571	0.0993508	0.57195	1.63946	9	17
GSE3337_4H_VS_16H_IFNG_IN_CD8POS_DC_DN	0.00297619	0.0323518	0.374329	1.63917	1	141
GSE3982_DC_VS_NKCELL_UP	0.00293686	0.0323518	0.372234	1.63866	1	144
GSE2405_HEAT_KILLED_LYSATE_VS_LIVE_A_PHAGOCYTOPHILUM_STIM_NEUTROPHIL_24H_UP	0.00298063	0.0323518	0.377511	1.63827	1	131
IVANOVA_HEMATOPOIESIS_LATE_PROGENITOR	0.00123916	0.0323518	0.326638	1.6382	0	437
GSE17974_CTRL_VS_ACT_IL4_AND_ANTI_IL12_2H_CD4_TCELL_DN	0.00294551	0.0323518	0.372435	1.63702	1	143
KEGG_NEUROACTIVE_LIGAND_RECEPTOR_INTERACTION	0.00492611	0.040822	0.436635	1.63612	2	51
GO_VASCULAR_PROCESS_IN_CIRCULATORY_SYSTEM	0.0063593	0.0481629	0.427373	1.63568	3	60
GSE22886_NAIVE_CD8_TCELL_VS_NEUTROPHIL_DN	0.00460829	0.0395102	0.393327	1.63536	2	97
RHEIN_ALL_GLUCOCORTICOID_THERAPY_UP	0.00642055	0.0484621	0.432143	1.63525	3	57
HOSHIDA_LIVER_CANCER_SUBCLASS_S1	0.00139276	0.0323518	0.358387	1.63524	0	178
GSE10239_NAIVE_VS_KLRG1HIGH_EFF_CD8_TCELL_UP	0.00292398	0.0323518	0.367874	1.63478	1	153
GSE339_CD4POS_VS_CD4CD8DN_DC_DN	0.00294551	0.0323518	0.371805	1.63425	1	143
GO_IMMUNE_RESPONSE_REGULATING_CELL_SURFACE_RECEPTOR_SIGNALING_PATHWAY	0.00139665	0.0323518	0.352084	1.63339	0	215
WIELAND_UP_BY_HBV_INFECTION	0.00789889	0.0562854	0.414071	1.63243	4	70
GSE26669_CTRL_VS_COSTIM_BLOCK_MLR_CD8_TCELL_UP	0.00285307	0.0323518	0.362009	1.632	1	162
GSE7218_UNSTIM_VS_ANTIGEN_STIM_THROUGH_IGG_BCELL_DN	0.00615385	0.0471677	0.38571	1.63189	3	109
CROONQUIST_NRAS_SIGNALING_UP	0.0216306	0.113273	0.483494	1.6318	12	31
GO_PEPTIDYL_CYSTEINE_MODIFICATION	0.0178253	0.0992976	0.589352	1.63166	9	15
GSE9960_HEALTHY_VS_SEPSIS_PBMC_UP	0.00459418	0.0395102	0.383356	1.63048	2	115
GSE40666_UNTREATED_VS_IFNA_STIM_EFFECTOR_CD8_TCELL_90MIN_UP	0.00294551	0.0323518	0.370844	1.63003	1	143
GSE21360_PRIMARY_VS_QUATERNARY_MEMORY_CD8_TCELL_UP	0.00291971	0.0323518	0.367227	1.62967	1	152
GSE11961_FOLLICULAR_BCELL_VS_MEMORY_BCELL_DAY7_UP	0.00291545	0.0323518	0.369067	1.62906	1	145
GSE17721_4H_VS_24H_POLYIC_BMDC_UP	0.00292398	0.0323518	0.366561	1.62894	1	153
GO_REGULATION_OF_MITOCHONDRIAL_MEMBRANE_POTENTIAL	0.0182724	0.101031	0.459804	1.6288	10	38
GSE12845_IGD_NEG_BLOOD_VS_PRE_GC_TONSIL_BCELL_UP	0.00295858	0.0323518	0.371037	1.62832	1	142
GSE21546_UNSTIM_VS_ANTI_CD3_STIM_SAP1A_KO_DP_THYMOCYTES_UP	0.00458716	0.0395063	0.389324	1.62742	2	100
OHGUCHI_LIVER_HNF4A_TARGETS_DN	0.0180328	0.10012	0.455315	1.62649	10	39
PELLICCIOTTA_HDAC_IN_ANTIGEN_PRESENTATION_UP	0.0063593	0.0481629	0.424918	1.62628	3	60
GSE339_EX_VIVO_VS_IN_CULTURE_CD8POS_DC_DN	0.00287356	0.0323518	0.362227	1.62572	1	160
GO_SUBSTANTIA_NIGRA_DEVELOPMENT	0.0186441	0.102199	0.476695	1.62525	10	33
MORI_IMMATURE_B_LYMPHOCYTE_UP	0.00977199	0.0655468	0.44108	1.62499	5	46
BERENJENO_ROCK_SIGNALING_NOT_VIA_RHOA_UP	0.0212014	0.11195	0.546985	1.62465	11	19
GO_FERROUS_IRON_BINDING	0.0179211	0.0995826	0.559754	1.62351	9	18
KEGG_AMYOTROPHIC_LATERAL_SCLEROSIS_ALS	0.0186441	0.102199	0.4761	1.62323	10	33
HOXA9_DN.V1_UP	0.00292398	0.0323518	0.366608	1.62309	1	149
GO_PURINE_RIBONUCLEOSIDE_BIOSYNTHETIC_PROCESS	0.00637959	0.0482619	0.414925	1.62281	3	67
GO_PURINE_NUCLEOSIDE_BIOSYNTHETIC_PROCESS	0.00637959	0.0482619	0.414925	1.62281	3	67
GSE3039_B2_VS_B1_BCELL_UP	0.00293255	0.0323518	0.369994	1.62248	1	140
GSE20715_WT_VS_TLR4_KO_LUNG_UP	0.00296736	0.0323518	0.373005	1.62233	1	137
DELPUECH_FOXO3_TARGETS_UP	0.00977199	0.0655468	0.440093	1.62135	5	46
GO_PEPTIDASE_ACTIVATOR_ACTIVITY_INVOLVED_IN_APOPTOTIC_PROCESS	0.0178253	0.0992976	0.585485	1.62096	9	15
GO_POSITIVE_REGULATION_OF_CALCIUM_ION_IMPORT	0.0187075	0.10242	0.513929	1.62088	10	24
GSE17580_UNINFECTED_VS_S_MANSONI_INF_TEFF_DN	0.0029985	0.0323518	0.374343	1.62054	1	130
KORKOLA_EMBRYONAL_CARCINOMA_UP	0.0249584	0.124979	0.480151	1.62051	14	31
JISON_SICKLE_CELL_DISEASE_UP	0.00293686	0.0323518	0.368098	1.62046	1	144
HONMA_DOCETAXEL_RESISTANCE	0.0118243	0.0748818	0.49129	1.61961	6	29
GSE8835_CD4_VS_CD8_TCELL_CLL_PATIENT_UP	0.0030349	0.0323518	0.375841	1.61949	1	128
GSE369_PRE_VS_POST_IL6_INJECTION_SOCS3_KO_LIVER_UP	0.00285307	0.0323518	0.359216	1.61941	1	162
REACTOME_SIGNALING_BY_THE_B_CELL_RECEPTOR_BCR	0.00609756	0.0470871	0.381648	1.61938	3	112
GO_PYRIMIDINE_CONTAINING_COMPOUND_METABOLIC_PROCESS	0.00492611	0.040822	0.432103	1.61914	2	51
TAVOR_CEBPA_TARGETS_UP	0.0249584	0.124979	0.479732	1.6191	14	31
RAMALHO_STEMNESS_DN	0.00483871	0.0403477	0.428046	1.61876	2	56
GSE15930_STIM_VS_STIM_AND_IFNAB_48H_CD8_T_CELL_UP	0.00143062	0.0323518	0.358914	1.61863	0	169
REACTOME_LATENT_INFECTION_OF_HOMO_SAPIENS_WITH_MYCOBACTERIUM_TUBERCULOSIS	0.0206897	0.109637	0.523959	1.61821	11	22
GSE40274_CTRL_VS_FOXP3_AND_LEF1_TRANSDUCED_ACTIVATED_CD4_TCELL_DN	0.00445765	0.039019	0.372897	1.61794	2	132
GSE6269_HEALTHY_VS_STAPH_AUREUS_INF_PBMC_DN	0.00618238	0.0471971	0.385582	1.61768	3	103
KIM_ALL_DISORDERS_CALB1_CORR_UP	0.00126743	0.0323518	0.326924	1.61753	0	386
GSE37534_UNTREATED_VS_PIOGLITAZONE_TREATED_CD4_TCELL_PPARG1_AND_FOXP3_TRASDUCED_DN	0.00290698	0.0323518	0.362421	1.61715	1	155
REACTOME_BIOLOGICAL_OXIDATIONS	0.00993377	0.0663658	0.437974	1.6164	5	47
REACTOME_AQUAPORIN_MEDIATED_TRANSPORT	0.0206897	0.109637	0.523264	1.61607	11	22
GSE43955_1H_VS_60H_ACT_CD4_TCELL_WITH_TGFB_IL6_UP	0.002849	0.0323518	0.358832	1.61605	1	161
GNF2_NS	0.0150502	0.088056	0.452105	1.61547	8	40
MODULE_345	0.00953895	0.0643711	0.41892	1.61499	5	62
GNF2_PPP6C	0.0183028	0.101069	0.464953	1.6149	10	35
GSE40274_FOXP3_VS_FOXP3_AND_IRF4_TRANSDUCED_ACTIVATED_CD4_TCELL_UP	0.00293686	0.0323518	0.366669	1.61417	1	144
GO_RESPONSE_TO_TUMOR_NECROSIS_FACTOR	0.00294118	0.0323518	0.364894	1.61409	1	150
GSE15930_STIM_VS_STIM_AND_IL-12_48H_CD8_T_CELL_DN	0.0028777	0.0323518	0.3604	1.61394	1	157
GSE18203_CTRL_VS_INTRATUMORAL_CPG_INJ_MC38_TUMOR_DN	0.00289017	0.0323518	0.360712	1.61368	1	156
GSE17974_CTRL_VS_ACT_IL4_AND_ANTI_IL12_0.5H_CD4_TCELL_UP	0.00813008	0.0575953	0.428834	1.61332	4	52
GSE42021_TREG_PLN_VS_CD24LO_TREG_THYMUS_DN	0.00615385	0.0471677	0.381631	1.61264	3	108
GSE14699_NAIVE_VS_ACT_CD8_TCELL_UP	0.00293686	0.0323518	0.366294	1.61251	1	144
GSE9960_HEALTHY_VS_GRAM_POS_SEPSIS_PBMC_UP	0.00297177	0.0323518	0.370867	1.6125	1	135
GSE19198_1H_VS_6H_IL21_TREATED_TCELL_DN	0.00285307	0.0323518	0.357666	1.61242	1	162
HU_ANGIOGENESIS_DN	0.0196399	0.106135	0.489557	1.61214	11	27
GO_POSITIVE_REGULATION_OF_INTERLEUKIN_1_SECRETION	0.0213904	0.112459	0.582265	1.61204	11	15
GO_REGULATION_OF_RNA_STABILITY	0.0030303	0.0323518	0.375842	1.61176	1	121
GO_INNATE_IMMUNE_RESPONSE	0.0013089	0.0323518	0.333109	1.61009	0	308
KAECH_NAIVE_VS_MEMORY_CD8_TCELL_DN	0.0028777	0.0323518	0.359537	1.61008	1	157
KEGG_NICOTINATE_AND_NICOTINAMIDE_METABOLISM	0.0213904	0.112459	0.581408	1.60967	11	15
MORF_RAD23B	0.00142045	0.0323518	0.356474	1.60926	0	168
GO_ERYTHROCYTE_DEVELOPMENT	0.0179211	0.0995826	0.554691	1.60882	9	18
GO_REGULATION_OF_VASCULAR_ENDOTHELIAL_GROWTH_FACTOR_PRODUCTION	0.0240964	0.122311	0.531561	1.60853	13	20
NIELSEN_SYNOVIAL_SARCOMA_DN	0.0251799	0.125758	0.57277	1.6079	13	16
GSE46606_IRF4_KO_VS_WT_CD40L_IL2_IL5_1DAY_STIMULATED_BCELL_DN	0.00618238	0.0471971	0.38059	1.60708	3	107
GO_CELL_ACTIVATION_INVOLVED_IN_IMMUNE_RESPONSE	0.00616333	0.0471863	0.389878	1.60695	3	92
GNF2_LYN	0.0224138	0.116286	0.525948	1.6062	12	21
GSE17721_PAM3CSK4_VS_CPG_0.5H_BMDC_DN	0.0030349	0.0323518	0.373614	1.60517	1	124
COLIN_PILOCYTIC_ASTROCYTOMA_VS_GLIOBLASTOMA_DN	0.0229682	0.118473	0.540298	1.60479	12	19
GO_FC_EPSILON_RECEPTOR_SIGNALING_PATHWAY	0.00607903	0.0470871	0.376399	1.60477	3	116
GO_RESPONSE_TO_ZINC_ION	0.0201005	0.10784	0.502709	1.60451	11	25
VERHAAK_GLIOBLASTOMA_MESENCHYMAL	0.00289017	0.0323518	0.35857	1.6041	1	156
GSE29618_MONOCYTE_VS_MDC_UP	0.00290698	0.0323518	0.359473	1.60399	1	155
GSE42021_TREG_PLN_VS_CD24INT_TREG_THYMUS_DN	0.00294118	0.0323518	0.366035	1.60303	1	139
GSE1460_DP_THYMOCYTE_VS_THYMIC_STROMAL_CELL_DN	0.00294118	0.0323518	0.365975	1.60277	1	139
GO_REGULATION_OF_ORGAN_MORPHOGENESIS	0.00453858	0.0394875	0.372374	1.60254	2	127
VARELA_ZMPSTE24_TARGETS_DN	0.0197133	0.106473	0.552472	1.60238	10	18
GSE37301_HEMATOPOIETIC_STEM_CELL_VS_PRO_BCELL_DN	0.00301659	0.0323518	0.371796	1.60229	1	126
GSE24634_TREG_VS_TCONV_POST_DAY5_IL4_CONVERSION_DN	0.00297619	0.0323518	0.365771	1.60169	1	141
GSE1432_CTRL_VS_IFNG_24H_MICROGLIA_DN	0.00294551	0.0323518	0.36437	1.60157	1	143
MODULE_170	0.00802568	0.0570976	0.423201	1.60141	4	57
GO_HUMORAL_IMMUNE_RESPONSE	0.00493421	0.0408638	0.426067	1.60114	2	53
KAAB_FAILED_HEART_VENTRICLE_DN	0.0220339	0.11476	0.467047	1.60109	12	34
GO_SOCIAL_BEHAVIOR	0.0267857	0.130582	0.558561	1.60108	14	17
GO_INTRASPECIES_INTERACTION_BETWEEN_ORGANISMS	0.0267857	0.130582	0.558561	1.60108	14	17
HOEGERKORP_CD44_TARGETS_DIRECT_UP	0.0213904	0.112459	0.578283	1.60102	11	15
PROVENZANI_METASTASIS_DN	0.00616333	0.0471863	0.388425	1.60096	3	92
GO_REGULATION_OF_RESPONSE_TO_REACTIVE_OXYGEN_SPECIES	0.0258176	0.127845	0.528942	1.60061	14	20
WIERENGA_PML_INTERACTOME	0.0182421	0.100905	0.453136	1.5994	10	37
HOEBEKE_LYMPHOID_STEM_CELL_DN	0.00641026	0.0484117	0.411155	1.59892	3	66
GO_PHOSPHOLIPASE_C_ACTIVATING_G_PROTEIN_COUPLED_RECEPTOR_SIGNALING_PATHWAY	0.0224138	0.116286	0.517596	1.59856	12	22
FURUKAWA_DUSP6_TARGETS_PCI35_UP	0.0186125	0.102109	0.480154	1.59855	10	30
GO_OXIDOREDUCTASE_ACTIVITY	0.00122699	0.0323518	0.31905	1.59849	0	422
NABA_ECM_REGULATORS	0.00641026	0.0484117	0.410877	1.59784	3	66
GSE17721_0.5H_VS_4H_PAM3CSK4_BMDC_UP	0.002849	0.0323518	0.35458	1.5969	1	161
ABE_INNER_EAR	0.0201005	0.10784	0.500252	1.59667	11	25
KEGG_HEMATOPOIETIC_CELL_LINEAGE	0.0182421	0.100905	0.4523	1.59645	10	37
GSE4984_UNTREATED_VS_GALECTIN1_TREATED_DC_DN	0.00620155	0.0472551	0.378423	1.59584	3	106
GSE24634_IL4_VS_CTRL_TREATED_NAIVE_CD4_TCELL_DAY7_DN	0.00293255	0.0323518	0.363781	1.59524	1	140
GO_INTERMEDIATE_FILAMENT_BASED_PROCESS	0.028777	0.136729	0.567854	1.5941	15	16
SCHAEFFER_PROSTATE_DEVELOPMENT_6HR_UP	0.00615385	0.0471677	0.376757	1.59406	3	110
WONG_PROTEASOME_GENE_MODULE	0.0114007	0.0731337	0.432608	1.59378	6	46
GSE14415_INDUCED_TREG_VS_FOXP3_KO_INDUCED_TREG_IL2_CULTURE_UP	0.00445765	0.039019	0.367267	1.59351	2	132
GSE22886_NAIVE_TCELL_VS_DC_UP	0.00294118	0.0323518	0.360229	1.59346	1	150
GO_PROTON_TRANSPORTING_V_TYPE_ATPASE_COMPLEX	0.0267857	0.130582	0.555729	1.59296	14	17
GO_NEGATIVE_REGULATION_OF_TRANSPORTER_ACTIVITY	0.0266223	0.13012	0.471798	1.59232	15	31
GSE7219_UNSTIM_VS_LPS_AND_ANTI_CD40_STIM_DC_DN	0.00297177	0.0323518	0.366121	1.5923	1	136
ZHONG_SECRETOME_OF_LUNG_CANCER_AND_FIBROBLAST	0.00618238	0.0471971	0.379182	1.59083	3	103
GSE24634_TEFF_VS_TCONV_DAY7_IN_CULTURE_DN	0.00291971	0.0323518	0.358595	1.59048	1	151
MORF_MAP2K2	0.00453858	0.0394875	0.369568	1.59046	2	127
GSE20366_EX_VIVO_VS_HOMEOSTATIC_CONVERSION_NAIVE_CD4_TCELL_DN	0.00456621	0.0394875	0.382347	1.59044	2	96
MORF_BAG5	0.00496689	0.0410075	0.424408	1.59039	2	54
GSE1460_DP_THYMOCYTE_VS_NAIVE_CD4_TCELL_ADULT_BLOOD_DN	0.00297177	0.0323518	0.365665	1.59032	1	136
MODULE_484	0.0167224	0.0946919	0.445051	1.59027	9	40
BRCA1_DN.V1_DN	0.00633914	0.0480647	0.41619	1.59025	3	59
GSE19198_CTRL_VS_IL21_TREATED_TCELL_6H_UP	0.00285307	0.0323518	0.35272	1.59013	1	162
GSE42021_TREG_PLN_VS_TREG_PRECURSORS_THYMUS_DN	0.00455235	0.0394875	0.369013	1.59007	2	128
SCHAEFFER_PROSTATE_DEVELOPMENT_48HR_UP	0.00139665	0.0323518	0.341136	1.58965	0	224
GO_RESPONSE_TO_CYTOKINE	0.00124069	0.0323518	0.318538	1.58943	0	419
GO_GLUTATHIONE_METABOLIC_PROCESS	0.0232945	0.119431	0.457606	1.58938	13	35
GO_ORGANELLE_ENVELOPE_LUMEN	0.00801282	0.0570364	0.408639	1.58914	4	66
GO_RESPONSE_TO_TOXIC_SUBSTANCE	0.00294118	0.0323518	0.359225	1.58902	1	150
GNF2_FOS	0.0280992	0.134898	0.464351	1.58737	16	32
REACTOME_S_PHASE	0.00618238	0.0471971	0.378258	1.58695	3	103
GSE40068_CXCR5NEG_BCL6NEG_CD4_TCELL_VS_CXCR5POS_BCL6NEG_TFH_UP	0.00291971	0.0323518	0.357591	1.5869	1	152
GO_ACTIN_NUCLEATION	0.028777	0.136729	0.565287	1.58689	15	16
GSE17322_CD103_POS_VS_CD11B_HIGH_LUNG_DC_UP	0.00294118	0.0323518	0.359213	1.58631	1	148
GO_SARCOLEMMA	0.0097561	0.0655468	0.421535	1.58586	5	52
GSE9316_CD4_TCELL_BALBC_VS_TH17_ENRI_CD4_TCELL_SKG_PMA_IONO_STIM_FR4NEG_UP	0.00615385	0.0471677	0.374707	1.58534	3	109
GO_CELLULAR_DEFENSE_RESPONSE	0.0185811	0.102021	0.480729	1.58479	10	29
CHOI_ATL_CHRONIC_VS_ACUTE_DN	0.0268817	0.130743	0.546311	1.58452	14	18
GO_HYDRO_LYASE_ACTIVITY	0.0236887	0.120648	0.507224	1.58378	13	23
GSE24142_EARLY_THYMIC_PROGENITOR_VS_DN2_THYMOCYTE_UP	0.00285307	0.0323518	0.351298	1.58371	1	162
MOHANKUMAR_TLX1_TARGETS_DN	0.0111288	0.0719069	0.410652	1.58312	6	62
MODULE_128	0.00806452	0.0572534	0.41826	1.58252	4	55
MODULE_79	0.00806452	0.0572534	0.41826	1.58252	4	55
GSE1925_CTRL_VS_24H_IFNG_STIM_IFNG_PRIMED_MACROPHAGE_UP	0.00296736	0.0323518	0.363788	1.58225	1	137
GSE25123_CTRL_VS_IL4_AND_ROSIGLITAZONE_STIM_MACROPHAGE_DN	0.00605144	0.0470871	0.378112	1.58224	3	99
CAHOY_ASTROGLIAL	0.0146341	0.0864921	0.431125	1.58101	8	45
GSE13522_CTRL_VS_T_CRUZI_Y_STRAIN_INF_SKIN_BALBC_MOUSE_UP	0.00612557	0.0471677	0.376877	1.58043	3	102
CHIARADONNA_NEOPLASTIC_TRANSFORMATION_CDC25_DN	0.00609756	0.0470871	0.372416	1.58021	3	112
GSE32034_UNTREATED_VS_ROSIGLIZATONE_TREATED_LY6C_HIGH_MONOCYTE_DN	0.00291121	0.0323518	0.354351	1.57915	1	154
GO_POSITIVE_REGULATION_OF_INTERLEUKIN_6_PRODUCTION	0.0160256	0.091835	0.431836	1.5791	9	44
GO_CELLULAR_MONOVALENT_INORGANIC_CATION_HOMEOSTASIS	0.00822368	0.0580432	0.423528	1.57902	4	50
FOSTER_TOLERANT_MACROPHAGE_UP	0.00615385	0.0471677	0.373173	1.57885	3	109
GSE29618_BCELL_VS_PDC_DN	0.002886	0.0323518	0.352872	1.5788	1	158
LIANG_HEMATOPOIESIS_STEM_CELL_NUMBER_LARGE_VS_TINY_DN	0.0229508	0.118429	0.441954	1.57876	13	39
GSE42021_CD24HI_TREG_VS_CD24HI_TCONV_THYMUS_UP	0.00282885	0.0323518	0.348573	1.57856	1	172
GSE22886_NEUTROPHIL_VS_DC_DN	0.00137552	0.0323518	0.344279	1.57835	0	182
MODULE_306	0.0224138	0.116286	0.511017	1.57824	12	22
MMS_MOUSE_LYMPH_HIGH_4HRS_UP	0.0280992	0.134898	0.46168	1.57824	16	32
GSE22886_NAIVE_TCELL_VS_NKCELL_UP	0.00439883	0.0388718	0.361085	1.57802	2	138
GSE39556_UNTREATED_VS_3H_POLYIC_INJ_MOUSE_CD8A_DC_UP	0.00606061	0.0470871	0.367941	1.57788	3	121
GSE411_WT_VS_SOCS3_KO_MACROPHAGE_UP	0.00285307	0.0323518	0.349551	1.57691	1	163
GSE17721_POLYIC_VS_PAM3CSK4_0.5H_BMDC_UP	0.00609756	0.0470871	0.376148	1.57677	3	101
GO_REGULATION_OF_PEPTIDASE_ACTIVITY	0.00142857	0.0323518	0.343515	1.57657	0	201
GSE17721_LPS_VS_GARDIQUIMOD_6H_BMDC_DN	0.00285307	0.0323518	0.349682	1.57643	1	162
GSE1925_CTRL_VS_IFNG_PRIMED_MACROPHAGE_24H_IFNG_STIM_DN	0.00290698	0.0323518	0.353179	1.57591	1	155
GO_HOMEOSTASIS_OF_NUMBER_OF_CELLS	0.00447094	0.0390587	0.363095	1.57571	2	131
GSE36826_NORMAL_VS_STAPH_AUREUS_INF_SKIN_UP	0.0028777	0.0323518	0.351819	1.57552	1	157
GSE32034_LY6C_HIGH_VS_LOW_ROSIGLIZATONE_TREATED_MONOCYTE_UP	0.00291121	0.0323518	0.353425	1.57502	1	154
GO_MACROMOLECULAR_COMPLEX_DISASSEMBLY	0.00289017	0.0323518	0.351944	1.57445	1	156
GSE3982_MAC_VS_EFF_MEMORY_CD4_TCELL_UP	0.00293255	0.0323518	0.356283	1.57443	1	147
BIOCARTA_MPR_PATHWAY	0.0266223	0.13012	0.48618	1.57406	15	26
GO_POSITIVE_REGULATION_OF_IMMUNE_RESPONSE	0.00126422	0.0323518	0.320335	1.57403	0	356
GO_CARBOHYDRATE_TRANSPORTER_ACTIVITY	0.0268817	0.130743	0.542671	1.57396	14	18
GSE42021_CD24HI_VS_CD24INT_TREG_THYMUS_DN	0.00439883	0.0388718	0.36014	1.57389	2	138
SWEET_KRAS_ONCOGENIC_SIGNATURE	0.00778816	0.0555852	0.394322	1.57311	4	74
GNF2_XRCC5	0.0125984	0.0780834	0.400101	1.57303	7	69
GSE7218_IGM_VS_IGG_SIGNAL_THGOUGH_ANTIGEN_BCELL_DN	0.00615385	0.0471677	0.371698	1.57266	3	110
GSE32901_TH1_VS_TH17_ENRICHED_CD4_TCELL_DN	0.00609756	0.0470871	0.370385	1.57247	3	113
GROSS_ELK3_TARGETS_DN	0.0238095	0.121085	0.498563	1.57242	13	24
MODULE_108	0.0282862	0.13524	0.465866	1.5723	16	31
GSE37301_MULTIPOTENT_PROGENITOR_VS_COMMON_LYMPHOID_PROGENITOR_UP	0.00447094	0.0390587	0.362299	1.57226	2	131
YAGI_AML_RELAPSE_PROGNOSIS	0.0282862	0.13524	0.465704	1.57176	16	31
GSE7831_CPG_VS_INFLUENZA_STIM_PDC_1H_DN	0.0030349	0.0323518	0.365748	1.57138	1	124
GO_POSITIVE_REGULATION_OF_CALCIUM_ION_TRANSPORT	0.00990099	0.0662129	0.423957	1.57124	5	49
GOLDRATH_EFF_VS_MEMORY_CD8_TCELL_UP	0.00277778	0.0323518	0.345051	1.57111	1	174
GSE15930_NAIVE_VS_48H_IN_VITRO_STIM_CD8_TCELL_DN	0.00140056	0.0323518	0.343205	1.57094	0	189
NADLER_HYPERGLYCEMIA_AT_OBESITY	0.0145396	0.0862381	0.430882	1.57085	8	43
GSE20715_0H_VS_6H_OZONE_LUNG_UP	0.00441176	0.0388718	0.358614	1.57053	2	139
GSE30971_CTRL_VS_LPS_STIM_MACROPHAGE_WBP7_HET_2H_DN	0.00291971	0.0323518	0.35397	1.56996	1	151
GSE25123_WT_VS_PPARG_KO_MACROPHAGE_IL4_STIM_DN	0.00295858	0.0323518	0.357616	1.56942	1	142
GSE26912_TUMORICIDAL_VS_CTRL_MACROPHAGE_DN	0.00293255	0.0323518	0.355116	1.56928	1	147
GSE19888_ADENOSINE_A3R_ACT_VS_TCELL_MEMBRANES_ACT_IN_MAST_CELL_UP	0.00445104	0.039019	0.360728	1.56894	2	137
GO_POSITIVE_REGULATION_OF_I_KAPPAB_KINASE_NF_KAPPAB_SIGNALING	0.00445104	0.039019	0.360681	1.56873	2	137
GSE37605_FOXP3_FUSION_GFP_VS_IRES_GFP_TREG_NOD_UP	0.00425532	0.0382362	0.347713	1.56862	2	164
GNF2_MBD4	0.0253807	0.126196	0.502352	1.56856	14	23
BURTON_ADIPOGENESIS_7	0.0237288	0.120766	0.459797	1.56764	13	33
GO_NEGATIVE_REGULATION_OF_CATION_TRANSMEMBRANE_TRANSPORT	0.0266223	0.13012	0.484139	1.56745	15	26
GO_REGULATION_OF_CALCIUM_ION_TRANSPORT	0.00764526	0.0547406	0.376516	1.56691	4	95
MORF_RAC1	0.00141443	0.0323518	0.340565	1.56678	0	202
GSE12392_WT_VS_IFNB_KO_CD8A_NEG_SPLEEN_DC_UP	0.002849	0.0323518	0.347597	1.56673	1	165
GO_MAST_CELL_ACTIVATION	0.026738	0.130566	0.565816	1.5665	14	15
GSE25123_CTRL_VS_ROSIGLITAZONE_STIM_PPARG_KO_MACROPHAGE_UP	0.00445765	0.039019	0.360097	1.5661	2	136
REACTOME_PREFOLDIN_MEDIATED_TRANSFER_OF_SUBSTRATE_TO_CCT_TRIC	0.0253807	0.126196	0.501539	1.56602	14	23
GO_NEGATIVE_REGULATION_OF_TRANSMEMBRANE_TRANSPORT	0.0200669	0.107746	0.438126	1.56553	11	40
MODULE_288	0.026738	0.130566	0.565358	1.56523	14	15
GSE24634_TEFF_VS_TCONV_DAY10_IN_CULTURE_DN	0.00291121	0.0323518	0.351215	1.56517	1	154
GSE16385_UNTREATED_VS_12H_ROSIGLITAZONE_IL4_TREATED_MACROPHAGE_DN	0.00613497	0.0471677	0.369439	1.56478	3	111
GSE15330_HSC_VS_LYMPHOID_PRIMED_MULTIPOTENT_PROGENITOR_DN	0.00289017	0.0323518	0.349781	1.56478	1	156
GSE15330_MEGAKARYOCYTE_ERYTHROID_VS_GRANULOCYTE_MONOCYTE_PROGENITOR_UP	0.00291971	0.0323518	0.352595	1.56387	1	151
GSE6674_ANTI_IGM_VS_ANTI_IGM_AND_CPG_STIM_BCELL_UP	0.00289017	0.0323518	0.349562	1.5638	1	156
GSE11057_NAIVE_VS_MEMORY_CD4_TCELL_DN	0.00287356	0.0323518	0.348429	1.5638	1	160
GSE5589_LPS_AND_IL10_VS_LPS_AND_IL6_STIM_IL6_KO_MACROPHAGE_45MIN_UP	0.00285307	0.0323518	0.346398	1.56268	1	163
MODULE_84	0.00126904	0.0323518	0.319731	1.56236	0	332
KIM_GLIS2_TARGETS_UP	0.0213115	0.112354	0.434012	1.56227	12	41
GO_REGULATION_OF_CALCIUM_ION_IMPORT	0.0114007	0.0731337	0.423989	1.56202	6	46
GSE3982_DC_VS_CENT_MEMORY_CD4_TCELL_UP	0.00290698	0.0323518	0.35006	1.56199	1	155
MORF_MBD4	0.00936037	0.0634863	0.384894	1.56158	5	82
chr1q21	0.00612557	0.0471677	0.367099	1.56134	3	115
GO_CELLULAR_CHEMICAL_HOMEOSTASIS	0.00132802	0.0323518	0.32606	1.56078	0	275
GSE4748_CTRL_VS_CYANOBACTERIUM_LPSLIKE_STIM_DC_3H_DN	0.00284495	0.0323518	0.345045	1.56043	1	170
GSE19401_UNSTIM_VS_RETINOIC_ACID_STIM_FOLLICULAR_DC_UP	0.00294118	0.0323518	0.352758	1.56041	1	150
GSE5679_CTRL_VS_PPARG_LIGAND_ROSIGLITAZONE_AND_RARA_AGONIST_AM580_TREATED_DC_DN	0.00441176	0.0388718	0.35629	1.56035	2	139
GSE16385_MONOCYTE_VS_12H_ROSIGLITAZONE_TREATED_MACROPHAGE_DN	0.00284091	0.0323518	0.345303	1.55882	1	168
MORF_DEK	0.00136426	0.0323518	0.329519	1.5586	0	253
GAVIN_FOXP3_TARGETS_CLUSTER_T4	0.0157729	0.0908928	0.394203	1.55841	9	72
GO_RESPONSE_TO_INORGANIC_SUBSTANCE	0.00132979	0.0323518	0.325146	1.55759	0	281
KAECH_DAY15_EFF_VS_MEMORY_CD8_TCELL_DN	0.0028777	0.0323518	0.34768	1.55698	1	157
GSE16522_ANTI_CD3CD28_STIM_VS_UNSTIM_MEMORY_CD8_TCELL_DN	0.00285307	0.0323518	0.345348	1.55689	1	162
GOTZMANN_EPITHELIAL_TO_MESENCHYMAL_TRANSITION_DN	0.00292398	0.0323518	0.350328	1.55681	1	153
GNF2_PTPN6	0.0245902	0.123784	0.435708	1.55645	14	39
GO_DEOXYRIBONUCLEOSIDE_TRIPHOSPHATE_METABOLIC_PROCESS	0.0285205	0.135897	0.562101	1.55622	15	15
REACTOME_IMMUNOREGULATORY_INTERACTIONS_BETWEEN_A_LYMPHOID_AND_A_NON_LYMPHOID_CELL	0.0299501	0.139771	0.480648	1.55615	17	26
GSE33425_CD161_HIGH_VS_INT_CD8_TCELL_DN	0.00286123	0.0323518	0.344932	1.55558	1	169
GSE43957_UNTREATED_VS_NACL_TREATED_ANTI_CD3_CD28_STIM_CD4_TCELL_DN	0.00290698	0.0323518	0.348613	1.55553	1	155
GSE24634_IL4_VS_CTRL_TREATED_NAIVE_CD4_TCELL_DAY5_UP	0.00294118	0.0323518	0.352037	1.55462	1	148
LIAN_LIPA_TARGETS_3M	0.0115132	0.0737846	0.416954	1.55451	6	50
MORF_UBE2A	0.0132013	0.0804042	0.41938	1.55428	7	49
HU_GENOTOXIC_DAMAGE_24HR	0.0202703	0.108359	0.471312	1.55375	11	29
MODULE_399	0.0299003	0.139636	0.438521	1.55341	17	38
GSE42021_TREG_PLN_VS_CD24HI_TREG_THYMUS_DN	0.00278552	0.0323518	0.340364	1.553	1	178
GO_T_CELL_ACTIVATION_INVOLVED_IN_IMMUNE_RESPONSE	0.0253807	0.126196	0.466353	1.5526	14	30
SEIDEN_ONCOGENESIS_BY_MET	0.0109034	0.0706899	0.38918	1.5526	6	74
GSE18791_UNSTIM_VS_NEWCATSLE_VIRUS_DC_2H_UP	0.0299003	0.139636	0.438253	1.55246	17	38
GSE27786_LSK_VS_CD8_TCELL_DN	0.00291971	0.0323518	0.351596	1.55198	1	146
GUILLAUMOND_KLF10_TARGETS_DN	0.0270728	0.131471	0.496811	1.55126	15	23
GSE29618_MONOCYTE_VS_MDC_DN	0.00294551	0.0323518	0.35281	1.55076	1	143
GO_T_CELL_PROLIFERATION	0.0334448	0.15021	0.468975	1.55028	19	28
GO_PH_REDUCTION	0.0327332	0.147758	0.470634	1.54983	19	27
BILANGES_SERUM_SENSITIVE_GENES	0.0131579	0.0802494	0.412398	1.54977	7	53
GERHOLD_ADIPOGENESIS_DN	0.0195122	0.105573	0.422569	1.54963	11	45
GSE27786_BCELL_VS_NKCELL_DN	0.00285307	0.0323518	0.343468	1.54947	1	163
GSE36826_WT_VS_IL1R_KO_SKIN_DN	0.00287356	0.0323518	0.345174	1.54918	1	160
JIANG_HYPOXIA_NORMAL	0.00137174	0.0323518	0.330182	1.54877	0	235
GO_CELLULAR_HOMEOSTASIS	0.00126743	0.0323518	0.315545	1.54868	0	352
GSE17721_CTRL_VS_LPS_24H_BMDC_DN	0.00291971	0.0323518	0.348876	1.54823	1	152
GSE43863_NAIVE_VS_MEMORY_TFH_CD4_TCELL_D150_LCMV_UP	0.00289017	0.0323518	0.345907	1.54745	1	156
GSE9601_UNTREATED_VS_NFKB_INHIBITOR_TREATED_HCMV_INF_MONOCYTE_UP	0.00927357	0.0632181	0.377357	1.54725	5	90
GO_MYOFIBRIL_ASSEMBLY	0.0323741	0.146781	0.551125	1.54714	17	16
GSE45881_CXCR6HI_VS_CXCR1LO_COLONIC_LAMINA_PROPRIA_DN	0.00443787	0.038999	0.355686	1.54652	2	133
GO_PHOSPHATIDYLCHOLINE_METABOLIC_PROCESS	0.0334448	0.15021	0.467774	1.54631	19	28
LIU_NASOPHARYNGEAL_CARCINOMA	0.0148026	0.0871747	0.414686	1.54606	8	50
GSE17186_BLOOD_VS_CORD_BLOOD_NAIVE_BCELL_UP	0.0027972	0.0323518	0.340037	1.54582	1	173
GO_DIGESTION	0.0253807	0.126196	0.464195	1.54541	14	30
KEGG_VIRAL_MYOCARDITIS	0.0334448	0.15021	0.467362	1.54495	19	28
MIKKELSEN_NPC_HCP_WITH_H3K4ME3_AND_H3K27ME3	0.0164474	0.09361	0.41395	1.54331	9	50
ONDER_CDH1_TARGETS_2_DN	0.0027933	0.0323518	0.337538	1.54282	1	192
GSE27786_NEUTROPHIL_VS_MONO_MAC_UP	0.00291545	0.0323518	0.349464	1.54253	1	145
MODULE_171	0.0125	0.0777255	0.38487	1.54246	7	76
GO_REGULATION_OF_PH	0.0211726	0.111842	0.418672	1.54244	12	46
GSE41867_DAY6_VS_DAY8_LCMV_ARMSTRONG_EFFECTOR_CD8_TCELL_UP	0.00437956	0.0388718	0.34941	1.54234	2	146
GO_RESPONSE_TO_KETONE	0.00772798	0.0551851	0.367568	1.54211	4	103
HOELZEL_NF1_TARGETS_UP	0.011236	0.0723896	0.406475	1.5417	6	58
GO_RESPONSE_TO_THYROID_HORMONE	0.0338681	0.151197	0.556784	1.5415	18	15
MORF_KDR	0.0351171	0.15486	0.466246	1.54126	20	28
GSE43955_TH0_VS_TGFB_IL6_IL23_TH17_ACT_CD4_TCELL_52H_DN	0.00289017	0.0323518	0.344473	1.54103	1	156
GO_CELLULAR_MODIFIED_AMINO_ACID_BIOSYNTHETIC_PROCESS	0.0295082	0.138239	0.431377	1.54098	17	39
GSE2585_THYMIC_MACROPHAGE_VS_MTEC_UP	0.00445765	0.039019	0.355131	1.54086	2	132
GSE22886_DAY0_VS_DAY7_MONOCYTE_IN_CULTURE_DN	0.00284495	0.0323518	0.341658	1.5404	1	166
SANSOM_APC_TARGETS_DN	0.00140449	0.0323518	0.333779	1.54028	0	205
GSE22886_NAIVE_CD4_TCELL_VS_12H_ACT_TH2_DN	0.0028169	0.0323518	0.338658	1.54016	1	175
GSE11057_NAIVE_VS_EFF_MEMORY_CD4_TCELL_DN	0.00588235	0.0459291	0.351618	1.53989	3	139
BRACHAT_RESPONSE_TO_METHOTREXATE_UP	0.0321429	0.146278	0.536956	1.53915	17	17
GSE9988_ANTI_TREM1_VS_ANTI_TREM1_AND_LPS_MONOCYTE_UP	0.00277778	0.0323518	0.338001	1.53901	1	174
GSE411_WT_VS_SOCS3_KO_MACROPHAGE_IL6_STIM_400MIN_UP	0.0058651	0.0458747	0.350863	1.53859	3	140
GSE17721_CTRL_VS_PAM3CSK4_0.5H_BMDC_DN	0.00762195	0.0546322	0.362367	1.53843	4	113
GSE16522_MEMORY_VS_NAIVE_CD8_TCELL_UP	0.00291971	0.0323518	0.346505	1.53771	1	152
KUROZUMI_RESPONSE_TO_ONCOCYTIC_VIRUS	0.0343699	0.152667	0.466921	1.5376	20	27
GSE3982_EOSINOPHIL_VS_DC_DN	0.0028777	0.0323518	0.343339	1.53754	1	157
GSE32255_UNSTIM_VS_4H_LPS_STIM_DC_DN	0.00769231	0.0549891	0.363353	1.5373	4	109
MODULE_27	0.00596125	0.0464908	0.353953	1.53604	3	131
NABA_ECM_AFFILIATED	0.0128411	0.0790017	0.405869	1.53583	7	57
GSE17721_4_VS_24H_CPG_BMDC_UP	0.00762195	0.0546322	0.361708	1.53563	4	113
GSE41176_WT_VS_TAK1_KO_UNSTIM_BCELL_UP	0.00762195	0.0546322	0.361692	1.53556	4	113
PID_SYNDECAN_1_PATHWAY	0.0323741	0.146781	0.546937	1.53538	17	16
GSE22886_NAIVE_TCELL_VS_NEUTROPHIL_DN	0.00772798	0.0551851	0.363588	1.53528	4	107
GO_PURINERGIC_RECEPTOR_ACTIVITY	0.0338681	0.151197	0.554527	1.53525	18	15
chrxq24	0.0323741	0.146781	0.546872	1.5352	17	16
GSE22443_NAIVE_VS_ACT_AND_IL2_TREATED_CD8_TCELL_DN	0.00953895	0.0643711	0.385278	1.53503	5	75
AMIT_EGF_RESPONSE_120_MCF10A	0.0304569	0.141395	0.46106	1.53498	17	30
LIAN_LIPA_TARGETS_6M	0.0129032	0.0791291	0.405851	1.53482	7	56
GO_INTRINSIC_COMPONENT_OF_MITOCHONDRIAL_OUTER_MEMBRANE	0.0376344	0.162427	0.529144	1.53473	20	18
GSE28130_ACTIVATED_VS_INDUCEED_TREG_UP	0.00762195	0.0546322	0.361419	1.53441	4	113
KARLSSON_TGFB1_TARGETS_DN	0.00289017	0.0323518	0.342933	1.53414	1	156
CASTELLANO_NRAS_TARGETS_UP	0.0145396	0.0862381	0.420605	1.53338	8	43
GSE43955_1H_VS_60H_ACT_CD4_TCELL_UP	0.0042796	0.0382362	0.340057	1.53304	2	162
GSE13547_WT_VS_ZFX_KO_BCELL_DN	0.00294118	0.0323518	0.346541	1.53291	1	150
GSE33425_CD161_HIGH_VS_INT_CD8_TCELL_UP	0.00425532	0.0382362	0.339723	1.53257	2	164
HALLMARK_ADIPOGENESIS	0.00425532	0.0382362	0.339679	1.53237	2	164
GSE3982_BCELL_VS_BASOPHIL_DN	0.00759878	0.0546322	0.357176	1.53227	4	123
GSE21546_UNSTIM_VS_ANTI_CD3_STIM_ELK1_KO_DP_THYMOCYTES_UP	0.0108192	0.0701777	0.373587	1.5318	6	90
GSE5455_EX_VIVO_VS_POST_24H_INCUBATION_MONOCYTES_FROM_TUMOR_BEARING_MOUSE_UP	0.00292398	0.0323518	0.345978	1.53175	1	149
APPEL_IMATINIB_RESPONSE	0.0287162	0.136655	0.464636	1.53174	16	29
LANDIS_ERBB2_BREAST_PRENEOPLASTIC_DN	0.0295082	0.138239	0.42544	1.53141	17	41
chr1q24	0.0344828	0.15292	0.495666	1.53083	19	22
GSE11961_PLASMA_CELL_DAY7_VS_MEMORY_BCELL_DAY40_UP	0.00588235	0.0459291	0.349547	1.53082	3	139
RAF_UP.V1_UP	0.0107198	0.0696947	0.359892	1.53069	6	115
GSE7509_DC_VS_MONOCYTE_UP	0.00286123	0.0323518	0.339273	1.53006	1	169
GO_REGULATION_OF_LIGASE_ACTIVITY	0.00758725	0.0546176	0.358471	1.53002	4	117
PID_SYNDECAN_2_PATHWAY	0.0304569	0.141395	0.489863	1.52957	17	23
GSE43955_1H_VS_10H_ACT_CD4_TCELL_UP	0.00290698	0.0323518	0.342719	1.52924	1	155
GO_REGULATION_OF_TRANSMEMBRANE_TRANSPORT	0.0042796	0.0382362	0.338969	1.52917	2	163
GSE17721_CTRL_VS_CPG_6H_BMDC_UP	0.0042796	0.0382362	0.338762	1.52823	2	163
LOCKWOOD_AMPLIFIED_IN_LUNG_CANCER	0.00562588	0.0445507	0.33577	1.52821	3	177
GSE21546_UNSTIM_VS_ANTI_CD3_STIM_SAP1A_KO_AND_ELK1_KO_DP_THYMOCYTES_DN	0.013245	0.0805604	0.414059	1.52814	7	47
GO_REGULATION_OF_MEMBRANE_DEPOLARIZATION	0.0392157	0.167308	0.551942	1.52809	21	15
GSE19401_PLN_VS_PEYERS_PATCH_FOLLICULAR_DC_DN	0.00426136	0.0382362	0.338456	1.52791	2	168
GSE33425_CD161_INT_VS_NEG_CD8_TCELL_UP	0.00416089	0.0376026	0.334024	1.5279	2	180
GO_POSITIVE_REGULATION_OF_CYTOKINE_PRODUCTION_INVOLVED_IN_IMMUNE_RESPONSE	0.0388693	0.166095	0.514409	1.52789	21	19
GSE3565_DUSP1_VS_WT_SPLENOCYTES_DN	0.00439883	0.0388718	0.345716	1.52774	2	147
GSE41867_DAY6_VS_DAY8_LCMV_ARMSTRONG_EFFECTOR_CD8_TCELL_DN	0.00284495	0.0323518	0.337794	1.52764	1	170
VANDESLUIS_COMMD1_TARGETS_GROUP_3_UP	0.0180624	0.100243	0.407615	1.52737	10	51
RICKMAN_METASTASIS_DN	0.00416089	0.0376026	0.333905	1.52735	2	180
GSE26928_CENTR_MEMORY_VS_CXCR5_POS_CD4_TCELL_UP	0.0138889	0.0835269	0.374406	1.52704	8	86
GSE3982_EOSINOPHIL_VS_MAST_CELL_DN	0.00292398	0.0323518	0.343397	1.52601	1	153
RADAEVA_RESPONSE_TO_IFNA1_UP	0.0250836	0.125418	0.427025	1.52586	14	40
GSE17721_0.5H_VS_8H_PAM3CSK4_BMDC_UP	0.00287356	0.0323518	0.339925	1.52563	1	160
JIANG_HYPOXIA_CANCER	0.0173776	0.0972489	0.38898	1.52475	10	68
chr7p15	0.0322034	0.146454	0.44715	1.52452	18	33
chr2p25	0.0351171	0.15486	0.460888	1.52355	20	28
GSE17721_LPS_VS_PAM3CSK4_12H_BMDC_DN	0.00426743	0.0382362	0.337866	1.52331	2	166
KEGG_O_GLYCAN_BIOSYNTHESIS	0.0357143	0.156667	0.531341	1.52306	19	17
GSE37416_CTRL_VS_3H_F_TULARENSIS_LVS_NEUTROPHIL_UP	0.00443787	0.038999	0.350239	1.52284	2	133
GO_FOLIC_ACID_CONTAINING_COMPOUND_METABOLIC_PROCESS	0.0394265	0.16798	0.52491	1.52245	21	18
GSE3982_MAC_VS_NKCELL_UP	0.00438596	0.0388718	0.343853	1.52234	2	149
CHICAS_RB1_TARGETS_LOW_SERUM	0.0128411	0.0790017	0.401369	1.52233	7	58
GSE11961_FOLLICULAR_BCELL_VS_GERMINAL_CENTER_BCELL_DAY40_DN	0.00441176	0.0388718	0.344701	1.52222	2	148
GO_REGULATION_OF_CALCIUM_ION_TRANSMEMBRANE_TRANSPORT	0.0129032	0.0791291	0.402447	1.52195	7	56
GRAHAM_CML_QUIESCENT_VS_NORMAL_QUIESCENT_UP	0.0188976	0.10304	0.386988	1.52148	11	69
COLLER_MYC_TARGETS_UP	0.0338409	0.151197	0.487223	1.52132	19	23
GSE29164_CD8_TCELL_VS_CD8_TCELL_AND_IL12_TREATED_MELANOMA_DAY3_DN	0.002886	0.0323518	0.340008	1.52125	1	158
GSE360_DC_VS_MAC_DN	0.0074184	0.053662	0.349756	1.52121	4	137
GSE40277_GATA1_AND_SATB1_TRANSDUCED_VS_CTRL_CD4_TCELL_UP	0.00441176	0.0388718	0.344393	1.52086	2	148
KUMAR_AUTOPHAGY_NETWORK	0.0377049	0.162479	0.425719	1.52076	22	39
IRITANI_MAD1_TARGETS_DN	0.0260586	0.128601	0.412676	1.52035	15	46
GO_MULTIVESICULAR_BODY	0.0362069	0.158309	0.49783	1.52033	20	21
MODULE_107	0.0372881	0.161297	0.443144	1.51915	21	34
GSE29164_UNTREATED_VS_CD8_TCELL_TREATED_MELANOMA_DAY7_UP	0.00426136	0.0382362	0.336293	1.51815	2	168
GO_CENTRAL_NERVOUS_SYSTEM_NEURON_DEVELOPMENT	0.0362069	0.158309	0.497086	1.51806	20	21
MORF_CTBP1	0.0042796	0.0382362	0.336616	1.51753	2	162
MIKKELSEN_MCV6_LCP_WITH_H3K4ME3	0.0202808	0.108372	0.373959	1.51722	12	82
GSE39820_TGFBETA3_IL6_VS_TGFBETA3_IL6_IL23A_TREATED_CD4_TCELL_DN	0.0106061	0.0691643	0.354169	1.51681	6	120
GSE3565_DUSP1_VS_WT_SPLENOCYTES_POST_LPS_INJECTION_UP	0.00736377	0.0533534	0.345066	1.51672	4	143
GSE14415_INDUCED_TREG_VS_FOXP3_KO_INDUCED_TREG_IL2_CULTURE_DN	0.0192308	0.104515	0.389996	1.51664	11	66
GSE29164_UNTREATED_VS_CD8_TCELL_TREATED_MELANOMA_DAY3_DN	0.00441176	0.0388718	0.343339	1.51621	2	148
LEE_METASTASIS_AND_ALTERNATIVE_SPLICING_UP	0.0382696	0.164056	0.436469	1.51597	22	35
GO_MUSCLE_ORGAN_MORPHOGENESIS	0.0338409	0.151197	0.48526	1.51519	19	23
VERHAAK_AML_WITH_NPM1_MUTATED_UP	0.00904977	0.0618818	0.351586	1.51519	5	126
GSE22886_DAY1_VS_DAY7_MONOCYTE_IN_CULTURE_DN	0.00416667	0.0376294	0.332653	1.51466	2	174
GCM_PPP1CC	0.0145161	0.0861754	0.400425	1.5143	8	56
GO_ION_HOMEOSTASIS	0.00133511	0.0323518	0.316934	1.51397	0	272
GSE30971_CTRL_VS_LPS_STIM_MACROPHAGE_WBP7_KO_2H_DN	0.00290276	0.0323518	0.338247	1.51372	1	159
GSE14769_UNSTIM_VS_60MIN_LPS_BMDM_UP	0.00294118	0.0323518	0.342172	1.51358	1	150
GSE3982_MAC_VS_CENT_MEMORY_CD4_TCELL_UP	0.00291971	0.0323518	0.340864	1.51267	1	152
MODULE_172	0.0243902	0.122962	0.412462	1.51257	14	45
GO_POSITIVE_REGULATION_OF_DEFENSE_RESPONSE	0.00271003	0.0323518	0.319133	1.51241	1	255
GO_METAL_CLUSTER_BINDING	0.016129	0.0920725	0.399567	1.51179	9	55
GSE26030_TH1_VS_TH17_DAY5_POST_POLARIZATION_UP	0.00744048	0.0537636	0.345089	1.51113	4	141
NUTT_GBM_VS_AO_GLIOMA_UP	0.0382696	0.164056	0.434991	1.51083	22	35
GSE26156_DOUBLE_POSITIVE_VS_CD4_SINGLE_POSITIVE_THYMOCYTE_UP	0.00441176	0.0388718	0.34186	1.50968	2	148
GSE18281_SUBCAPSULAR_CORTICAL_REGION_VS_WHOLE_MEDULLA_THYMUS_DN	0.0204082	0.108879	0.372951	1.50958	12	80
SHIPP_DLBCL_VS_FOLLICULAR_LYMPHOMA_DN	0.0482529	0.192709	0.466245	1.50952	28	26
ZAMORA_NOS2_TARGETS_UP	0.0144462	0.0858748	0.397826	1.5089	8	58
FAELT_B_CLL_WITH_VH3_21_DN	0.0311475	0.14348	0.419068	1.50848	18	41
TAKEDA_TARGETS_OF_NUP98_HOXA9_FUSION_10D_UP	0.0139535	0.0836147	0.367623	1.50792	8	91
SCHUETZ_BREAST_CANCER_DUCTAL_INVASIVE_UP	0.00568182	0.0447552	0.333113	1.50663	3	171
YAO_TEMPORAL_RESPONSE_TO_PROGESTERONE_CLUSTER_10	0.0190779	0.103759	0.393625	1.50652	11	60
GO_PHAGOCYTIC_VESICLE_MEMBRANE	0.0267559	0.130582	0.421543	1.50627	15	40
GSE29949_CD8_NEG_DC_SPLEEN_VS_CD8_POS_DC_SPLEEN_DN	0.0106222	0.0692355	0.350065	1.50613	6	125
GSE22886_NAIVE_TCELL_VS_DC_DN	0.0042735	0.0382362	0.334173	1.50572	2	167
GSE30971_WBP7_HET_VS_KO_MACROPHAGE_2H_LPS_STIM_UP	0.00728863	0.0529148	0.34106	1.50544	4	145
GSE32986_GMCSF_AND_CURDLAN_LOWDOSE_VS_GMCSF_AND_CURDLAN_HIGHDOSE_STIM_DC_DN	0.0188976	0.10304	0.382907	1.50543	11	69
CHEN_LIVER_METABOLISM_QTL_CIS	0.0193237	0.104807	0.389723	1.50531	11	65
GO_TRANSFERASE_ACTIVITY_TRANSFERRING_ALKYL_OR_ARYL_OTHER_THAN_METHYL_GROUPS	0.0240385	0.12211	0.411582	1.50504	14	44
GSE17721_CTRL_VS_PAM3CSK4_6H_BMDC_UP	0.00289017	0.0323518	0.33641	1.50496	1	156
GO_CHANNEL_INHIBITOR_ACTIVITY	0.0412186	0.172605	0.518871	1.50493	22	18
MORF_UNG	0.0157729	0.0908928	0.380525	1.50434	9	72
GSE11057_PBMC_VS_MEM_CD4_TCELL_UP	0.0089153	0.0611812	0.345978	1.50429	5	135
MAGRANGEAS_MULTIPLE_MYELOMA_IGG_VS_IGA_DN	0.0424028	0.176568	0.506418	1.50416	23	19
GO_ACTIN_FILAMENT	0.0242326	0.122537	0.412559	1.50405	14	43
GSE24142_EARLY_THYMIC_PROGENITOR_VS_DN2_THYMOCYTE_FETAL_DN	0.0121766	0.0762817	0.361562	1.50398	7	96
WALLACE_PROSTATE_CANCER_RACE_UP	0.0042796	0.0382362	0.333354	1.50384	2	163
GO_CYSTEINE_TYPE_ENDOPEPTIDASE_REGULATOR_ACTIVITY_INVOLVED_IN_APOPTOTIC_PROCESS	0.0451505	0.184437	0.454897	1.50374	26	28
GSE37532_VISCERAL_ADIPOSE_TISSUE_VS_LN_DERIVED_TCONV_CD4_TCELL_UP	0.0213816	0.112459	0.403291	1.50357	12	50
GO_REGULATION_OF_I_KAPPAB_KINASE_NF_KAPPAB_SIGNALING	0.00703235	0.0520518	0.330203	1.50287	4	177
GSE19923_E2A_KO_VS_E2A_AND_HEB_KO_DP_THYMOCYTE_DN	0.002886	0.0323518	0.335899	1.50286	1	158
GSE29164_UNTREATED_VS_CD8_TCELL_TREATED_MELANOMA_DAY3_UP	0.00568182	0.0447552	0.332179	1.5024	3	171
GNF2_VAV1	0.0451505	0.184437	0.454314	1.50182	26	28
GSE8685_IL2_ACT_IL2_STARVED_VS_IL15_ACT_IL2_STARVED_CD4_TCELL_DN	0.00583942	0.0458346	0.340203	1.50169	3	146
GSE9988_LOW_LPS_VS_VEHICLE_TREATED_MONOCYTE_DN	0.00559441	0.0444066	0.330247	1.50131	3	173
GO_REGULATION_OF_TYPE_2_IMMUNE_RESPONSE	0.0485612	0.193389	0.534585	1.5007	26	16
GSE33424_CD161_INT_VS_NEG_CD8_TCELL_DN	0.00290698	0.0323518	0.336214	1.50021	1	155
NAM_FXYD5_TARGETS_DN	0.0485612	0.193389	0.534337	1.50001	26	16
HAHTOLA_SEZARY_SYNDROM_UP	0.0188976	0.10304	0.379942	1.49987	11	71
chr11q14	0.0412186	0.172605	0.517106	1.49981	22	18
MCBRYAN_PUBERTAL_BREAST_6_7WK_DN	0.0248344	0.124729	0.406224	1.49923	14	47
LEIN_MEDULLA_MARKERS	0.0311475	0.14348	0.416491	1.4992	18	41
GO_POSITIVE_REGULATION_OF_WNT_SIGNALING_PATHWAY	0.015361	0.089095	0.360427	1.49857	9	97
GO_REGULATION_OF_CATION_TRANSMEMBRANE_TRANSPORT	0.0136157	0.0821798	0.358052	1.4983	8	99
REACTOME_G_ALPHA_I_SIGNALLING_EVENTS	0.0193548	0.104891	0.388407	1.49827	11	64
GO_POSITIVE_REGULATION_OF_ADAPTIVE_IMMUNE_RESPONSE	0.0260163	0.128449	0.40851	1.49807	15	45
GSE17721_4_VS_24H_GARDIQUIMOD_BMDC_UP	0.0089153	0.0611812	0.344438	1.498	5	136
GSE13522_CTRL_VS_T_CRUZI_Y_STRAIN_INF_SKIN_IFNAR_KO_UP	0.00879765	0.0606227	0.342598	1.49722	5	138
GSE22886_DAY0_VS_DAY1_MONOCYTE_IN_CULTURE_DN	0.00712251	0.0523426	0.332415	1.49707	4	161
LEE_LIVER_CANCER_SURVIVAL_DN	0.00587372	0.0459152	0.340006	1.49679	3	144
MARKS_HDAC_TARGETS_UP	0.0481283	0.192384	0.540613	1.49673	26	15
GSE7831_UNSTIM_VS_INFLUENZA_STIM_PDC_4H_DN	0.00437956	0.0388718	0.337425	1.49658	2	151
GO_RESPONSE_TO_ETHANOL	0.0158983	0.0913398	0.375558	1.4963	9	75
GO_CHAPERONE_BINDING	0.0193548	0.104891	0.387846	1.49611	11	64
GSE3039_ALPHAALPHA_CD8_TCELL_VS_B2_BCELL_DN	0.0058651	0.0458747	0.338477	1.49575	3	147
GSE37605_C57BL6_VS_NOD_FOXP3_IRES_GFP_TCONV_DN	0.00759878	0.0546322	0.348487	1.49499	4	123
GSE26030_TH1_VS_TH17_DAY15_POST_POLARIZATION_UP	0.00744048	0.0537636	0.341398	1.49497	4	141
HUMMERICH_SKIN_CANCER_PROGRESSION_DN	0.0194175	0.105145	0.391107	1.4949	11	61
GO_RESPONSE_TO_COPPER_ION	0.0412186	0.172605	0.515411	1.49489	22	18
TIEN_INTESTINE_PROBIOTICS_24HR_DN	0.00552486	0.0439067	0.326398	1.49404	3	181
GSE9946_LISTERIA_INF_MATURE_VS_PROSTAGLANDINE2_TREATED_MATURE_DC_DN	0.0422297	0.175957	0.453027	1.49347	24	29
WOOD_EBV_EBNA1_TARGETS_DN	0.040678	0.171144	0.435489	1.49291	23	34
GAZDA_DIAMOND_BLACKFAN_ANEMIA_MYELOID_DN	0.0451505	0.184437	0.451548	1.49267	26	28
SCHUHMACHER_MYC_TARGETS_UP	0.0188976	0.10304	0.378001	1.49221	11	71
GSE360_CTRL_VS_L_DONOVANI_MAC_UP	0.00435414	0.0387469	0.333048	1.49045	2	159
GSE2585_CD80_HIGH_VS_LOW_MTEC_DN	0.0139319	0.083555	0.359781	1.49023	8	94
GSE17721_12H_VS_24H_LPS_BMDC_DN	0.004329	0.0385489	0.332972	1.48977	2	158
ONDER_CDH1_SIGNALING_VIA_CTNNB1	0.0415282	0.173629	0.42055	1.48975	24	38
GO_REGULATION_OF_CYTOSOLIC_CALCIUM_ION_CONCENTRATION	0.0218069	0.114021	0.369551	1.48938	13	78
MODULE_40	0.0215232	0.112847	0.397251	1.48863	12	54
GSE13522_WT_VS_IFNAR_KO_SKIN_UP	0.00875912	0.0605131	0.337183	1.48837	5	146
GSE16451_CTRL_VS_WEST_EQUINE_ENC_VIRUS_MATURE_NEURON_CELL_LINE_DN	0.00596125	0.0464908	0.342968	1.48837	3	131
PID_RAS_PATHWAY	0.0481928	0.192526	0.491849	1.48836	27	20
DER_IFN_GAMMA_RESPONSE_UP	0.0208668	0.110444	0.39227	1.48783	12	58
GSE22886_NAIVE_CD4_TCELL_VS_NEUTROPHIL_DN	0.0122324	0.0765241	0.355915	1.48776	7	100
GSE3039_NKT_CELL_VS_ALPHABETA_CD8_TCELL_DN	0.00712251	0.0523426	0.330344	1.48775	4	161
BAUS_TFF2_TARGETS_UP	0.0465517	0.188276	0.48163	1.48748	26	22
GO_LEUKOCYTE_DEGRANULATION	0.0510204	0.199066	0.471286	1.48639	29	24
GO_REGULATION_OF_BLOOD_VESSEL_ENDOTHELIAL_CELL_MIGRATION	0.0468227	0.188858	0.449626	1.48632	27	28
ICHIBA_GRAFT_VERSUS_HOST_DISEASE_D7_DN	0.0477032	0.190913	0.500364	1.48618	26	19
GSE1460_CD4_THYMOCYTE_VS_THYMIC_STROMAL_CELL_DN	0.0122324	0.0765241	0.349998	1.48607	7	114
GSE16385_MONOCYTE_VS_MACROPHAGE_UP	0.0106707	0.0694859	0.349919	1.48558	6	113
GSE1460_CD4_THYMOCYTE_VS_NAIVE_CD4_TCELL_ADULT_BLOOD_DN	0.0091047	0.0621938	0.344744	1.48549	5	128
GSE13485_DAY1_VS_DAY7_YF17D_VACCINE_PBMC_DN	0.00584795	0.0458747	0.335338	1.48464	3	149
GO_UBIQUITIN_LIKE_PROTEIN_CONJUGATING_ENZYME_ACTIVITY	0.0536013	0.205009	0.464976	1.48407	31	25
NAKAMURA_TUMOR_ZONE_PERIPHERAL_VS_CENTRAL_UP	0.00423729	0.0381898	0.323236	1.48407	2	199
MODY_HIPPOCAMPUS_PRENATAL	0.0442623	0.182472	0.415428	1.484	26	39
GSE17721_PAM3CSK4_VS_GADIQUIMOD_12H_BMDC_UP	0.00727802	0.0529148	0.333	1.484	4	154
BRACHAT_RESPONSE_TO_CAMPTOTHECIN_UP	0.0448029	0.183842	0.511616	1.48389	24	18
GO_REGULATION_OF_ANATOMICAL_STRUCTURE_SIZE	0.00273224	0.0323518	0.314297	1.48386	1	249
NABA_MATRISOME_ASSOCIATED	0.00424328	0.0382181	0.321854	1.48373	2	203
GO_POSITIVE_REGULATION_OF_ION_TRANSPORT	0.0124031	0.0773748	0.351813	1.48362	7	106
TURASHVILI_BREAST_LOBULAR_CARCINOMA_VS_LOBULAR_NORMAL_UP	0.0415282	0.173629	0.418768	1.48344	24	38
WANG_HCP_PROSTATE_CANCER	0.0241935	0.122502	0.384426	1.48292	14	64
GSE17721_LPS_VS_POLYIC_12H_BMDC_DN	0.00879765	0.0606227	0.335535	1.48275	5	147
GSE3982_MAST_CELL_VS_BCELL_UP	0.0136364	0.0822301	0.34612	1.48234	8	120
RODWELL_AGING_KIDNEY_UP	0.00130719	0.0323518	0.306468	1.48117	0	307
HERNANDEZ_ABERRANT_MITOSIS_BY_DOCETACEL_2NM_UP	0.029316	0.137818	0.401987	1.48096	17	46
GO_REGULATION_OF_BLOOD_PRESSURE	0.0206677	0.10963	0.386931	1.4809	12	60
DIAZ_CHRONIC_MEYLOGENOUS_LEUKEMIA_DN	0.0248447	0.124729	0.366336	1.48065	15	79
GO_KINASE_INHIBITOR_ACTIVITY	0.0296053	0.138548	0.397135	1.48062	17	50
GO_POSITIVE_REGULATION_OF_CALCIUM_ION_TRANSMEMBRANE_TRANSPORT	0.0456081	0.185582	0.44905	1.48036	26	29
GSE17721_LPS_VS_PAM3CSK4_2H_BMDC_DN	0.0139104	0.083555	0.352275	1.48018	8	104
GSE39864_WT_VS_GATA3_KO_TREG_DN	0.00703235	0.0520518	0.325163	1.47993	4	177
GSE13887_RESTING_VS_NO_TREATED_CD4_TCELL_DN	0.0205371	0.109218	0.375373	1.47987	12	70
GO_POSITIVE_REGULATION_OF_MUSCLE_CONTRACTION	0.0539568	0.206074	0.52714	1.4798	29	16
GO_DEFENSE_RESPONSE_TO_BACTERIUM	0.0152905	0.0888019	0.360738	1.47966	9	88
GSE19941_UNSTIM_VS_LPS_STIM_IL10_KO_MACROPHAGE_UP	0.0136986	0.0825684	0.355534	1.47891	8	96
GO_CELLULAR_RESPONSE_TO_INTERLEUKIN_4	0.0517857	0.200375	0.51583	1.47859	28	17
GSE9006_HEALTHY_VS_TYPE_1_DIABETES_PBMC_AT_DX_UP	0.00721501	0.0527615	0.330449	1.47847	4	158
GSE17721_12H_VS_24H_GARDIQUIMOD_BMDC_DN	0.0085592	0.0594698	0.327681	1.47824	5	163
VISALA_AGING_LYMPHOCYTE_DN	0.0539568	0.206074	0.526475	1.47794	29	16
GSE411_UNSTIM_VS_100MIN_IL6_STIM_SOCS3_KO_MACROPHAGE_DN	0.00712251	0.0523426	0.328145	1.47784	4	161
GSE21927_SPLEEN_MONOCYTE_VS_GMCSF_GCSF_BONE_MARROW_DN	0.0136364	0.0822301	0.345057	1.47779	8	120
GO_NEGATIVE_REGULATION_OF_PROTEIN_POLYMERIZATION	0.0491525	0.194963	0.433357	1.4775	28	33
GO_POSITIVE_REGULATION_OF_INNATE_IMMUNE_RESPONSE	0.00564972	0.0446601	0.323127	1.4775	3	195
ZHANG_RESPONSE_TO_CANTHARIDIN_DN	0.0241935	0.122502	0.383006	1.47744	14	64
MARTORIATI_MDM4_TARGETS_NEUROEPITHELIUM_DN	0.0189274	0.10316	0.373715	1.47742	11	72
GSE6259_FLT3L_INDUCED_33D1_POS_DC_VS_BCELL_UP	0.00437956	0.0388718	0.33286	1.47715	2	152
GSE17721_LPS_VS_GARDIQUIMOD_24H_BMDC_UP	0.00894188	0.0612379	0.340354	1.47702	5	131
GO_NEGATIVE_REGULATION_OF_TRANSFERASE_ACTIVITY	0.00272851	0.0323518	0.311909	1.47695	1	254
GO_HIPPO_SIGNALING	0.0588235	0.218001	0.533367	1.47666	32	15
KEGG_PATHOGENIC_ESCHERICHIA_COLI_INFECTION	0.0320513	0.146105	0.403823	1.47666	19	44
GO_NEGATIVE_REGULATION_OF_ENDOCYTOSIS	0.0599002	0.220759	0.45601	1.47638	35	26
KIM_LRRC3B_TARGETS	0.0535714	0.204954	0.514983	1.47617	29	17
GSE7764_IL15_NK_CELL_24H_VS_SPLENOCYTE_DN	0.00725689	0.0529148	0.329842	1.4761	4	159
GSE17721_LPS_VS_CPG_16H_BMDC_UP	0.010355	0.0678914	0.336348	1.47608	6	142
GSE1925_CTRL_VS_IFNG_PRIMED_MACROPHAGE_24H_IFNG_STIM_UP	0.0121396	0.0761572	0.343035	1.47588	7	125
GO_CARDIAC_MUSCLE_TISSUE_MORPHOGENESIS	0.0512367	0.199466	0.496886	1.47585	28	19
GO_ATPASE_COUPLED_ION_TRANSMEMBRANE_TRANSPORTER_ACTIVITY	0.0371567	0.161145	0.404796	1.47575	22	43
GSE21670_IL6_VS_TGFB_AND_IL6_TREATED_CD4_TCELL_UP	0.0122699	0.076723	0.346563	1.47528	7	118
CHESLER_BRAIN_QTL_CIS	0.03125	0.143484	0.395655	1.47511	18	50
GSE33292_DN3_THYMOCYTE_VS_TCF1_KO_TCELL_LYMPHOMA_UP	0.0103093	0.067691	0.335585	1.47504	6	143
GRUETZMANN_PANCREATIC_CANCER_UP	0.00134953	0.0323518	0.309963	1.47482	0	268
HOFFMANN_SMALL_PRE_BII_TO_IMMATURE_B_LYMPHOCYTE_UP	0.0279146	0.134301	0.393586	1.47481	16	51
WIERENGA_STAT5A_TARGETS_GROUP1	0.0221169	0.115147	0.374088	1.4748	13	70
GO_NEGATIVE_REGULATION_OF_RELEASE_OF_CYTOCHROME_C_FROM_MITOCHONDRIA	0.0623886	0.226567	0.53266	1.47471	34	15
BMI1_DN.V1_DN	0.023622	0.120452	0.375042	1.47451	14	69
GSE7219_WT_VS_NIK_NFKB2_KO_LPS_AND_ANTI_CD40_STIM_DC_DN	0.00879765	0.0606227	0.337355	1.47431	5	138
MORF_RAB1A	0.0055325	0.0439414	0.321589	1.47415	3	186
GSE9650_NAIVE_VS_MEMORY_CD8_TCELL_DN	0.010101	0.066948	0.329358	1.4736	6	158
GO_REGULATION_OF_PROTEIN_POLYMERIZATION	0.016692	0.0946396	0.345227	1.4735	10	117
OUELLET_CULTURED_OVARIAN_CANCER_INVASIVE_VS_LMP_UP	0.0225806	0.116789	0.389427	1.47342	13	55
GO_POSITIVE_REGULATION_OF_PEPTIDASE_ACTIVITY	0.0124031	0.0773748	0.349329	1.47314	7	106
GSE9988_ANTI_TREM1_AND_LPS_VS_VEHICLE_TREATED_MONOCYTES_DN	0.00704225	0.0520963	0.323916	1.47311	4	175
GSE20484_MCSG_VS_CXCL4_MONOCYTE_DERIVED_MACROPHAGE_UP	0.00894188	0.0612379	0.339449	1.4731	5	131
PID_HDAC_CLASSII_PATHWAY	0.0512397	0.199466	0.430751	1.47251	30	32
MODULE_61	0.0377049	0.162479	0.409073	1.4725	22	41
GSE27859_CD11C_INT_F480_HI_MACROPHAGE_VS_CD11C_ING_F480_INT_DC_DN	0.00879765	0.0606227	0.333188	1.47237	5	147
BARRIER_COLON_CANCER_RECURRENCE_UP	0.0515807	0.20025	0.423863	1.47218	30	35
GSE18281_SUBCAPSULAR_VS_CENTRAL_CORTICAL_REGION_OF_THYMUS_DN	0.00568182	0.0447552	0.325496	1.47217	3	171
MCBRYAN_PUBERTAL_BREAST_4_5WK_UP	0.0121396	0.0761572	0.342598	1.47192	7	124
KYNG_ENVIRONMENTAL_STRESS_RESPONSE_NOT_BY_GAMMA_IN_WS	0.0534483	0.204717	0.476493	1.47162	30	22
GSE13946_CTRL_VS_DSS_COLITIS_GD_TCELL_FROM_COLON_UP	0.0103093	0.067691	0.33463	1.47085	6	143
MODULE_5	0.00134228	0.0323518	0.309219	1.47058	0	266
GAJATE_RESPONSE_TO_TRABECTEDIN_UP	0.0331126	0.149068	0.39845	1.47053	19	47
GSE34006_UNTREATED_VS_A2AR_AGONIST_TREATED_TREG_DN	0.00438596	0.0388718	0.330803	1.47004	2	153
GSE3982_CENT_MEMORY_CD4_TCELL_VS_TH1_DN	0.00568182	0.0447552	0.32563	1.47001	3	168
GSE21033_CTRL_VS_POLYIC_STIM_DC_24H_UP	0.0151976	0.0884926	0.344741	1.46979	9	116
GSE13762_CTRL_VS_125_VITAMIND_DAY5_DC_UP	0.0468227	0.188858	0.411312	1.46971	27	40
GSE1460_CORD_VS_ADULT_BLOOD_NAIVE_CD4_TCELL_DN	0.00727802	0.0529148	0.329763	1.46958	4	154
FLECHNER_BIOPSY_KIDNEY_TRANSPLANT_REJECTED_VS_OK_DN	0.00252525	0.0323518	0.29897	1.46909	1	355
GSE21063_WT_VS_NFATC1_KO_3H_ANTI_IGM_STIM_BCELL_UP	0.0167428	0.0947671	0.353152	1.469	10	96
LEE_LIVER_CANCER_ACOX1_UP	0.0491803	0.195015	0.41119	1.46887	29	39
GSE32986_GMCSF_VS_GMCSF_AND_CURDLAN_LOWDOSE_STIM_DC_UP	0.00718391	0.0526384	0.32727	1.46883	4	160
GO_CELLULAR_KETONE_METABOLIC_PROCESS	0.0448505	0.183842	0.414523	1.4684	26	38
GSE339_CD8POS_VS_CD4CD8DN_DC_UP	0.00727802	0.0529148	0.329341	1.46769	4	154
CHIANG_LIVER_CANCER_SUBCLASS_PROLIFERATION_DN	0.0241935	0.122502	0.387815	1.46733	14	55
GSE22432_PDC_VS_TGFB1_TREATEDCOMMON_DC_PROGENITOR_UP	0.0085592	0.0594698	0.32515	1.46683	5	163
GSE34006_UNTREATED_VS_A2AR_AGONIST_TREATED_TREG_UP	0.00854701	0.0594698	0.325393	1.46665	5	165
GO_CALCIUM_CHANNEL_REGULATOR_ACTIVITY	0.0593525	0.219343	0.522346	1.46635	32	16
JECHLINGER_EPITHELIAL_TO_MESENCHYMAL_TRANSITION_UP	0.0448505	0.183842	0.413846	1.466	26	38
GSE32423_CTRL_VS_IL4_MEMORY_CD8_TCELL_DN	0.0121396	0.0761572	0.3411	1.46548	7	124
ACOSTA_PROLIFERATION_INDEPENDENT_MYC_TARGETS_DN	0.0261941	0.128994	0.360043	1.46525	16	81
GO_MEMBRANE_BIOGENESIS	0.0593525	0.219343	0.521925	1.46516	32	16
GSE36888_UNTREATED_VS_IL2_TREATED_STAT5_AB_KNOCKIN_TCELL_6H_DN	0.0100719	0.066912	0.327142	1.46501	6	157
GSE33425_CD161_INT_VS_NEG_CD8_TCELL_DN	0.00848656	0.0593569	0.323473	1.46489	5	172
GSE22886_NAIVE_CD4_TCELL_VS_MEMORY_TCELL_DN	0.0085592	0.0594698	0.324645	1.46455	5	163
WANG_TARGETS_OF_MLL_CBP_FUSION_DN	0.0403877	0.170459	0.401697	1.46445	24	43
GO_ORGANIC_HYDROXY_COMPOUND_TRANSMEMBRANE_TRANSPORTER_ACTIVITY	0.0571429	0.214566	0.51072	1.46395	31	17
ONKEN_UVEAL_MELANOMA_DN	0.00377834	0.0346369	0.295536	1.46365	2	379
GO_MYELOID_CELL_ACTIVATION_INVOLVED_IN_IMMUNE_RESPONSE	0.0545455	0.207552	0.428076	1.46336	32	32
LENAOUR_DENDRITIC_CELL_MATURATION_DN	0.0139104	0.083555	0.348269	1.46335	8	104
KEGG_PYRUVATE_METABOLISM	0.0556465	0.210484	0.444311	1.46314	33	27
MORI_SMALL_PRE_BII_LYMPHOCYTE_DN	0.0205047	0.109176	0.370097	1.46311	12	72
GSE13522_CTRL_VS_T_CRUZI_G_STRAIN_INF_SKIN_UP	0.00887574	0.0610664	0.336492	1.46307	5	133
GO_INTRINSIC_APOPTOTIC_SIGNALING_PATHWAY_BY_P53_CLASS_MEDIATOR	0.0448505	0.183842	0.412952	1.46283	26	38
GSE7568_CTRL_VS_24H_TGFB_TREATED_MACROPHAGES_WITH_IL4_AND_DEXAMETHASONE_DN	0.0269414	0.130985	0.378049	1.46215	16	63
P53_DN.V1_UP	0.0264798	0.129779	0.359994	1.4621	16	83
FOSTER_KDM1A_TARGETS_UP	0.0230769	0.11885	0.351022	1.46184	14	98
REACTOME_G1_S_TRANSITION	0.0214395	0.112672	0.348537	1.46158	13	102
GSE10325_CD4_TCELL_VS_LUPUS_CD4_TCELL_DN	0.0151976	0.0884926	0.340687	1.46153	9	123
GSE29164_UNTREATED_VS_CD8_TCELL_AND_IL12_TREATED_MELANOMA_DAY7_DN	0.00894188	0.0612379	0.336732	1.4613	5	131
GSE25123_IL4_VS_IL4_AND_ROSIGLITAZONE_STIM_MACROPHAGE_DAY10_UP	0.00894188	0.0612379	0.336641	1.46091	5	131
SERVITJA_ISLET_HNF1A_TARGETS_DN	0.0545455	0.207552	0.427341	1.46085	32	32
GO_NEGATIVE_REGULATION_OF_PROTEIN_BINDING	0.024077	0.122259	0.38605	1.46083	14	57
GO_REGULATION_OF_ACTIN_FILAMENT_LENGTH	0.0198171	0.106747	0.34848	1.46079	12	101
GSE29618_BCELL_VS_PDC_DAY7_FLU_VACCINE_DN	0.00441176	0.0388718	0.330182	1.46055	2	150
GO_MYELOID_DENDRITIC_CELL_ACTIVATION	0.0607143	0.222602	0.509423	1.46023	33	17
GO_ACTIN_FILAMENT_ORGANIZATION	0.0185471	0.101918	0.347993	1.45998	11	103
REACTOME_CHEMOKINE_RECEPTORS_BIND_CHEMOKINES	0.0636516	0.229225	0.4574	1.45989	37	25
GSE3982_BCELL_VS_CENT_MEMORY_CD4_TCELL_UP	0.0089955	0.0615421	0.337209	1.45979	5	130
GO_PHAGOSOME_ACIDIFICATION	0.0618375	0.2253	0.491406	1.45957	34	19
GSE22140_GERMFREE_VS_SPF_MOUSE_CD4_TCELL_DN	0.00853485	0.0594698	0.323688	1.45939	5	166
GSE1460_CORD_VS_ADULT_BLOOD_NAIVE_CD4_TCELL_UP	0.0183206	0.101069	0.341984	1.45928	11	119
GSE23505_IL6_IL1_VS_IL6_IL1_TGFB_TREATED_CD4_TCELL_DN	0.00854701	0.0594698	0.323855	1.45923	5	167
SANA_TNF_SIGNALING_DN	0.0357724	0.156768	0.387872	1.45922	21	52
SASSON_RESPONSE_TO_GONADOTROPHINS_UP	0.0236967	0.120648	0.370048	1.45887	14	70
GO_NEURAL_NUCLEUS_DEVELOPMENT	0.0465116	0.188171	0.411832	1.45887	27	38
GSE2770_IL12_VS_IL4_TREATED_ACT_CD4_TCELL_6H_UP	0.0137615	0.0828724	0.343487	1.45843	8	114
TIEN_INTESTINE_PROBIOTICS_24HR_UP	0.00243605	0.0323518	0.28868	1.45825	1	494
GSE27291_6H_VS_7D_STIM_GAMMADELTA_TCELL_UP	0.0118343	0.074892	0.335347	1.45809	7	133
GSE38681_WT_VS_LYL1_KO_LYMPHOID_PRIMED_MULTIPOTENT_PROGENITOR_DN	0.0115607	0.0739733	0.325873	1.45782	7	156
GSE3982_DC_VS_EFF_MEMORY_CD4_TCELL_UP	0.0104167	0.0680953	0.332887	1.4577	6	141
GSE13738_RESTING_VS_TCR_ACTIVATED_CD4_TCELL_DN	0.00873362	0.0604618	0.327036	1.45742	5	154
MARKEY_RB1_CHRONIC_LOF_DN	0.0292758	0.137778	0.358065	1.4572	18	81
MARTENS_TRETINOIN_RESPONSE_UP	0.00691563	0.0513015	0.317876	1.45713	4	186
GO_CARBOXY_LYASE_ACTIVITY	0.0646259	0.231177	0.461969	1.457	37	24
GSE19401_RETINOIC_ACID_VS_RETINOIC_ACID_AND_PAM2CSK4_STIM_FOLLICULAR_DC_UP	0.0213415	0.112459	0.347511	1.45673	13	101
GO_CELL_SUBSTRATE_JUNCTION	0.00131406	0.0323518	0.302761	1.45641	0	299
GSE34006_WT_VS_A2AR_KO_TREG_DN	0.0104167	0.0680953	0.332571	1.45631	6	141
GSE24142_ADULT_VS_FETAL_DN2_THYMOCYTE_UP	0.0103858	0.0680262	0.334805	1.45618	6	137
GO_POSITIVE_REGULATION_OF_INTERFERON_GAMMA_PRODUCTION	0.0613599	0.223987	0.412419	1.45568	36	37
GO_NEGATIVE_REGULATION_OF_TRANSPORT	0.00541272	0.0431952	0.307697	1.45557	3	251
GSE17721_0.5H_VS_8H_CPG_BMDC_UP	0.0125	0.0777255	0.319643	1.45542	8	174
MODULE_155	0.0663265	0.235234	0.461458	1.45539	38	24
GSE7460_CTRL_VS_TGFB_TREATED_ACT_FOXP3_HET_TCONV_DN	0.011782	0.0747201	0.331107	1.45536	7	143
BRACHAT_RESPONSE_TO_CISPLATIN	0.0660714	0.234591	0.507648	1.45514	36	17
POMEROY_MEDULLOBLASTOMA_PROGNOSIS_DN	0.052459	0.202159	0.407264	1.45484	31	39
GSE34205_HEALTHY_VS_FLU_INF_INFANT_PBMC_DN	0.010219	0.0672301	0.329579	1.4548	6	146
GSE23502_BM_VS_COLON_TUMOR_HDC_KO_MYELOID_DERIVED_SUPPRESSOR_CELL_DN	0.0100575	0.0668582	0.324129	1.45473	6	160
FERRANDO_T_ALL_WITH_MLL_ENL_FUSION_UP	0.0275081	0.132834	0.380554	1.45456	16	61
GO_POSITIVE_REGULATION_OF_INTERLEUKIN_1_BETA_PRODUCTION	0.0573477	0.215204	0.501489	1.45452	31	18
GSE13173_UNTREATED_VS_IL12_TREATED_ACT_CD8_TCELL_UP	0.0582363	0.216827	0.41875	1.45442	34	35
MORF_XPC	0.0317965	0.145245	0.380012	1.45442	19	60
GSE14415_ACT_VS_CTRL_NATURAL_TREG_UP	0.00882353	0.0607697	0.329327	1.45433	5	148
QI_PLASMACYTOMA_UP	0.011236	0.0723896	0.314775	1.454	7	207
GSE43955_1H_VS_42H_ACT_CD4_TCELL_WITH_TGFB_IL6_UP	0.0101597	0.067137	0.324903	1.454	6	159
GSE43955_10H_VS_60H_ACT_CD4_TCELL_WITH_TGFB_IL6_UP	0.0130058	0.0796485	0.324875	1.45336	8	156
GO_NUCLEOSIDE_MONOPHOSPHATE_BIOSYNTHETIC_PROCESS	0.0273752	0.132421	0.376262	1.45331	16	65
GSE9988_LPS_VS_VEHICLE_TREATED_MONOCYTE_DN	0.00848656	0.0593569	0.320898	1.45323	5	172
GSE7460_FOXP3_MUT_VS_WT_ACT_TCONV_UP	0.0118871	0.0750075	0.334065	1.45289	7	136
GSE2706_2H_VS_8H_R848_STIM_DC_UP	0.0118871	0.0750075	0.33407	1.45252	7	135
GO_RIBOSOMAL_SMALL_SUBUNIT_BIOGENESIS	0.0274194	0.132586	0.383612	1.45142	16	55
MODULE_45	0.00377358	0.0346171	0.29327	1.45133	2	376
MORF_PSMC2	0.02	0.10743	0.34345	1.4513	12	108
GSE21063_WT_VS_NFATC1_KO_3H_ANTI_IGM_STIM_BCELL_DN	0.00875912	0.0605131	0.327026	1.45127	5	152
GSE5099_MONOCYTE_VS_CLASSICAL_M1_MACROPHAGE_UP	0.0171073	0.0963006	0.344656	1.45102	10	105
PENG_RAPAMYCIN_RESPONSE_DN	0.00698324	0.0517456	0.312033	1.45083	4	220
GENTLES_LEUKEMIC_STEM_CELL_UP	0.0701439	0.243745	0.516816	1.45082	38	16
GO_IRON_SULFUR_CLUSTER_ASSEMBLY	0.0696429	0.242792	0.506139	1.45082	38	17
GO_METALLO_SULFUR_CLUSTER_ASSEMBLY	0.0696429	0.242792	0.506139	1.45082	38	17
SMID_BREAST_CANCER_LUMINAL_B_DN	0.00696379	0.0516301	0.310372	1.45071	4	232
RHODES_CANCER_META_SIGNATURE	0.0288925	0.13692	0.382392	1.45036	17	58
WANG_RESPONSE_TO_BEXAROTENE_UP	0.065371	0.233124	0.488302	1.45035	36	19
GSE27670_CTRL_VS_BLIMP1_TRANSDUCED_GC_BCELL_UP	0.0263975	0.129518	0.356338	1.45027	16	85
STEIN_ESRRA_TARGETS_UP	0.00132275	0.0323518	0.301943	1.45023	0	293
GO_MHC_PROTEIN_BINDING	0.0573477	0.215204	0.49999	1.45017	31	18
GSE41176_UNSTIM_VS_ANTI_IGM_STIM_TAK1_KO_BCELL_1H_UP	0.00877193	0.0605702	0.326302	1.45004	5	153
GO_POSITIVE_REGULATION_OF_TRANSMEMBRANE_TRANSPORT	0.0290323	0.137259	0.383411	1.44996	17	56
GSE17721_POLYIC_VS_GARDIQUIMOD_16H_BMDC_DN	0.00854701	0.0594698	0.321731	1.44966	5	167
LEE_AGING_CEREBELLUM_UP	0.0291262	0.137303	0.379256	1.4496	17	61
GSE16450_IMMATURE_VS_MATURE_NEURON_CELL_LINE_12H_IFNA_STIM_UP	0.0131195	0.0801118	0.32832	1.4492	8	145
GSE557_CIITA_KO_VS_I_AB_KO_DC_UP	0.010219	0.0672301	0.326664	1.44885	6	151
KAAB_HEART_ATRIUM_VS_VENTRICLE_DN	0.0125698	0.0780508	0.317355	1.44816	8	179
CHIBA_RESPONSE_TO_TSA_UP	0.0748752	0.254536	0.447234	1.44797	44	26
DAVIES_MULTIPLE_MYELOMA_VS_MGUS_DN	0.0663265	0.235234	0.45907	1.44786	38	24
FRIDMAN_SENESCENCE_UP	0.0345395	0.153121	0.385264	1.4478	20	53
GSE17721_LPS_VS_PAM3CSK4_16H_BMDC_DN	0.0100575	0.0668582	0.322578	1.44777	6	160
GSE3982_NEUTROPHIL_VS_NKCELL_UP	0.0101597	0.067137	0.323498	1.44771	6	159
GSE10239_NAIVE_VS_DAY4.5_EFF_CD8_TCELL_UP	0.0130058	0.0796485	0.323567	1.44751	8	156
CTGRYYYNATT_UNKNOWN	0.0621931	0.226226	0.439468	1.44719	37	27
GSE16385_UNTREATED_VS_12H_ROSIGLITAZONE_IFNG_TNF_TREATED_MACROPHAGE_DN	0.0216383	0.113273	0.344371	1.44697	13	104
GSE18804_SPLEEN_MACROPHAGE_VS_TUMORAL_MACROPHAGE_DN	0.0103858	0.0680262	0.33265	1.44681	6	137
GO_PROTEIN_TARGETING_TO_MITOCHONDRION	0.0436187	0.180418	0.396546	1.44567	26	43
GSE24634_NAIVE_CD4_TCELL_VS_DAY10_IL4_CONV_TREG_DN	0.0111888	0.0722251	0.317826	1.44485	7	173
GSE360_CTRL_VS_L_DONOVANI_DC_DN	0.0199081	0.107151	0.339672	1.44469	12	115
GSE7831_UNSTIM_VS_CPG_STIM_PDC_4H_DN	0.013373	0.0811841	0.332172	1.44466	8	136
CHICAS_RB1_TARGETS_CONFLUENT	0.0026455	0.0323518	0.300779	1.44464	1	293
FIGUEROA_AML_METHYLATION_CLUSTER_5_DN	0.0654045	0.233124	0.477314	1.44438	37	20
GSE27786_LSK_VS_NEUTROPHIL_DN	0.0183206	0.101069	0.337232	1.44431	11	122
REACTOME_CLASS_I_MHC_MEDIATED_ANTIGEN_PROCESSING_PRESENTATION	0.00571429	0.0449844	0.314686	1.44426	3	201
GO_PEPTIDASE_INHIBITOR_ACTIVITY	0.0344828	0.15292	0.385414	1.44419	20	51
GSE24142_DN2_VS_DN3_THYMOCYTE_UP	0.00873362	0.0604618	0.323885	1.44338	5	154
GO_ORGANIC_HYDROXY_COMPOUND_BIOSYNTHETIC_PROCESS	0.0231839	0.119312	0.351999	1.44328	14	90
HUANG_FOXA2_TARGETS_DN	0.0654045	0.233124	0.476896	1.44311	37	20
GO_CYTOKINE_SECRETION	0.062069	0.225897	0.467205	1.44293	35	22
GO_REGULATION_OF_CANONICAL_WNT_SIGNALING_PATHWAY	0.0118871	0.0750075	0.332405	1.44226	7	132
GSE29618_LAIV_VS_TIV_FLU_VACCINE_DAY7_MONOCYTE_DN	0.0181543	0.100627	0.335102	1.44213	11	127
GSE11057_CD4_EFF_MEM_VS_PBMC_DN	0.016129	0.0920725	0.326328	1.44206	10	147
GSE34156_NOD2_LIGAND_VS_TLR1_TLR2_LIGAND_6H_TREATED_MONOCYTE_UP	0.0102339	0.0672953	0.324417	1.44166	6	153
GSE11961_PLASMA_CELL_DAY7_VS_GERMINAL_CENTER_BCELL_DAY40_UP	0.0230061	0.118577	0.338615	1.44144	14	118
GSE2585_AIRE_KO_VS_WT_CD80_LOW_MTEC_DN	0.0145773	0.086385	0.326523	1.44127	9	145
GSE39820_CTRL_VS_IL1B_IL6_IL23A_CD4_TCELL_DN	0.0117647	0.074681	0.326364	1.44125	7	148
GO_TRANSITION_METAL_ION_TRANSMEMBRANE_TRANSPORTER_ACTIVITY	0.0737018	0.25192	0.45153	1.44116	43	25
KYNG_ENVIRONMENTAL_STRESS_RESPONSE_UP	0.0540984	0.206358	0.403404	1.44105	32	39
GSE6092_UNSTIM_VS_IFNG_STIM_ENDOTHELIAL_CELL_DN	0.010219	0.0672301	0.324888	1.44097	6	151
GSE15330_HSC_VS_LYMPHOID_PRIMED_MULTIPOTENT_PROGENITOR_IKAROS_KO_UP	0.0131965	0.0804042	0.3286	1.44096	8	140
GSE17721_LPS_VS_CPG_24H_BMDC_UP	0.0242424	0.122541	0.335966	1.44076	15	121
GSE43955_TH0_VS_TGFB_IL6_IL23_TH17_ACT_CD4_TCELL_60H_DN	0.010219	0.0672301	0.324757	1.4404	6	151
GSE37532_WT_VS_PPARG_KO_LN_TCONV_DN	0.012987	0.0796065	0.321937	1.44039	8	158
GO_PURINE_CONTAINING_COMPOUND_BIOSYNTHETIC_PROCESS	0.0304878	0.14149	0.350886	1.43999	19	87
GO_REGULATION_OF_FIBROBLAST_PROLIFERATION	0.0322581	0.146603	0.380731	1.43983	19	56
GSE24142_ADULT_VS_FETAL_EARLY_THYMIC_PROGENITOR_DN	0.0116788	0.0744185	0.32589	1.43851	7	146
GO_NEGATIVE_REGULATION_OF_PEPTIDASE_ACTIVITY	0.0287443	0.136671	0.343755	1.43847	18	99
REACTOME_REGULATION_OF_WATER_BALANCE_BY_RENAL_AQUAPORINS	0.0655172	0.233243	0.470926	1.43817	37	21
GO_RESPONSE_TO_CARBOHYDRATE	0.029052	0.137303	0.345509	1.43787	18	95
GSE28737_WT_VS_BCL6_HET_FOLLICULAR_BCELL_DN	0.0104167	0.0680953	0.328346	1.43781	6	141
GSE21546_UNSTIM_VS_ANTI_CD3_STIM_SAP1A_KO_AND_ELK1_KO_DP_THYMOCYTES_UP	0.0323575	0.146781	0.353301	1.43781	20	81
GSE27092_WT_VS_HDAC7_PHOSPHO_DEFICIENT_CD8_TCELL_DN	0.016035	0.0918492	0.325698	1.43763	10	145
chr17q12	0.0626058	0.227048	0.431776	1.43748	36	30
GO_LYASE_ACTIVITY	0.0259939	0.128386	0.343849	1.43733	16	100
GSE15139_GMCSF_TREATED_VS_UNTREATED_NEUTROPHILS_UP	0.0175953	0.0982209	0.325255	1.43732	11	147
GO_NEGATIVE_REGULATION_OF_SECRETION	0.0278638	0.134153	0.34699	1.43725	17	94
GO_REGULATION_OF_METAL_ION_TRANSPORT	0.0131579	0.0802494	0.324619	1.43719	8	149
GSE7400_CTRL_VS_CSF3_IN_VIVO_TREATED_PBMC_DN	0.0212766	0.112214	0.336918	1.43644	13	116
MODULE_263	0.0753769	0.255258	0.450025	1.43635	44	25
LINDVALL_IMMORTALIZED_BY_TERT_DN	0.0696517	0.242792	0.406899	1.4362	41	37
GO_POSITIVE_REGULATION_OF_INTERLEUKIN_1_PRODUCTION	0.0672414	0.237114	0.470153	1.43581	38	21
BORCZUK_MALIGNANT_MESOTHELIOMA_UP	0.00660502	0.0497422	0.2996	1.43527	4	274
GSE4535_BM_DERIVED_DC_VS_FOLLICULAR_DC_UP	0.0147059	0.0867628	0.327667	1.435	9	139
GSE36826_WT_VS_IL1R_KO_SKIN_STAPH_AUREUS_INF_UP	0.0127298	0.0786428	0.316765	1.43451	8	172
GO_MONOVALENT_INORGANIC_CATION_HOMEOSTASIS	0.0337079	0.151036	0.378161	1.43431	20	58
BREDEMEYER_RAG_SIGNALING_VIA_ATM_NOT_VIA_NFKB_UP	0.0677686	0.238402	0.407947	1.43418	40	36
chr18q21	0.0615641	0.224671	0.412706	1.43343	36	35
GO_NEGATIVE_REGULATION_OF_FATTY_ACID_METABOLIC_PROCESS	0.0645161	0.23097	0.494216	1.43342	35	18
GSE22886_IGG_IGA_MEMORY_BCELL_VS_BM_PLASMA_CELL_DN	0.0196078	0.106004	0.332602	1.43338	12	126
CREIGHTON_AKT1_SIGNALING_VIA_MTOR_DN	0.0671256	0.236986	0.473676	1.43337	38	20
WENG_POR_TARGETS_LIVER_UP	0.0765391	0.257551	0.442542	1.43278	45	26
GSE10325_CD4_TCELL_VS_BCELL_DN	0.0242792	0.122634	0.33567	1.43271	15	117
GO_MYELOID_CELL_DEVELOPMENT	0.059322	0.219343	0.417801	1.43228	34	34
GSE32986_UNSTIM_VS_CURDLAN_LOWDOSE_STIM_DC_DN	0.0142045	0.0847394	0.317245	1.43216	9	168
GSE17721_LPS_VS_CPG_2H_BMDC_DN	0.0182094	0.100849	0.332355	1.43211	11	128
GO_REGULATION_OF_MUSCLE_CONTRACTION	0.0348653	0.154258	0.374777	1.43201	21	59
MIKKELSEN_MCV6_HCP_WITH_H3K27ME3	0.0411184	0.172455	0.384016	1.43171	24	50
GO_NEGATIVE_REGULATION_OF_PROTEIN_SECRETION	0.0394737	0.16798	0.380969	1.43166	23	53
GSE339_EX_VIVO_VS_IN_CULTURE_CD4POS_DC_DN	0.0174927	0.0977706	0.324269	1.43132	11	145
GSE30971_WBP7_HET_VS_KO_MACROPHAGE_4H_LPS_STIM_UP	0.0163205	0.0930065	0.329077	1.43127	10	137
ABBUD_LIF_SIGNALING_1_DN	0.0819964	0.268931	0.51674	1.43063	45	15
GSE41867_NAIVE_VS_DAY30_LCMV_ARMSTRONG_MEMORY_CD8_TCELL_UP	0.0142248	0.0848221	0.316315	1.4305	9	170
GO_MITOCHONDRIAL_MEMBRANE_ORGANIZATION	0.0283019	0.13524	0.360234	1.43041	17	73
GO_POSITIVE_REGULATION_OF_CELL_KILLING	0.0645161	0.23097	0.493103	1.43019	35	18
GO_REGULATION_OF_INTERLEUKIN_1_BETA_PRODUCTION	0.0676819	0.23816	0.429581	1.43018	39	30
HADDAD_T_LYMPHOCYTE_AND_NK_PROGENITOR_DN	0.0540984	0.206358	0.397275	1.43003	32	41
GSE40666_WT_VS_STAT1_KO_CD8_TCELL_WITH_IFNA_STIM_90MIN_UP	0.0193165	0.104807	0.328687	1.4295	12	136
GSE37605_TREG_VS_TCONV_C57BL6_FOXP3_FUSION_GFP_DN	0.0244275	0.123104	0.333706	1.4292	15	122
MODULE_33	0.0138696	0.0834862	0.312373	1.42886	9	180
GSE23502_BM_VS_COLON_TUMOR_MYELOID_DERIVED_SUPPRESSOR_CELL_UP	0.011782	0.0747201	0.325069	1.42882	7	143
GSE46606_IRF4HIGH_VS_IRF4MID_CD40L_IL2_IL5_DAY1_STIMULATED_BCELL_DN	0.0327103	0.147704	0.35171	1.42865	20	84
GO_RESPONSE_TO_ALCOHOL	0.00848656	0.0593569	0.309809	1.4282	5	203
GSE6674_ANTI_IGM_VS_PL2_3_STIM_BCELL_UP	0.0156695	0.0904531	0.316852	1.42816	10	165
GSE40685_NAIVE_CD4_TCELL_VS_FOXP3_KO_TREG_PRECURSOR_UP	0.0133136	0.0808672	0.325378	1.42794	8	142
GSE9650_GP33_VS_GP276_LCMV_SPECIFIC_EXHAUSTED_CD8_TCELL_DN	0.013986	0.0836971	0.314036	1.42762	9	173
GSE32164_RESTING_DIFFERENTIATED_VS_CMYC_INHIBITED_MACROPHAGE_UP	0.0193165	0.104807	0.328041	1.42669	12	136
FLECHNER_PBL_KIDNEY_TRANSPLANT_OK_VS_DONOR_DN	0.0568562	0.21397	0.399265	1.42666	33	40
GSE23505_UNTREATED_VS_4DAY_IL6_IL1_TREATED_CD4_TCELL_UP	0.0140845	0.0841359	0.313697	1.42664	9	175
GSE4748_CYANOBACTERIUM_LPSLIKE_VS_LPS_AND_CYANOBACTERIUM_LPSLIKE_STIM_DC_3H_DN	0.0309119	0.143036	0.347935	1.42662	19	90
GSE11973_MIR223_KOVS_WT_BONE_MARROW_NEUTROPHIL_UP	0.0128388	0.0790017	0.316439	1.42656	8	162
GSE20715_0H_VS_24H_OZONE_LUNG_UP	0.0175953	0.0982209	0.322761	1.4263	11	147
GO_POSITIVE_REGULATION_OF_PROTEOLYSIS	0.00395778	0.036158	0.297279	1.42629	2	280
GO_REGULATION_OF_CELLULAR_PH	0.0585284	0.217501	0.399022	1.4258	34	40
GSE26488_WT_VS_HDAC7_DELTAP_TG_OT2_THYMOCYTE_WITH_PEPTIDE_INJECTION_UP	0.0310078	0.143109	0.3381	1.42579	19	106
GSE3982_NEUTROPHIL_VS_BCELL_DN	0.0158273	0.0911108	0.318295	1.42539	10	157
GSE22282_HYPOXIA_VS_NORMOXIA_MYELOID_DC_UP	0.0174927	0.0977706	0.322787	1.42478	11	145
GSE14000_4H_VS_16H_LPS_DC_TRANSLATED_RNA_UP	0.015896	0.0913398	0.318473	1.42472	10	156
GO_TRANSLATION_ELONGATION_FACTOR_ACTIVITY	0.0791367	0.263141	0.507509	1.4247	43	16
GSE22886_TCELL_VS_BCELL_NAIVE_DN	0.0336391	0.15088	0.347319	1.42462	21	88
GSE23398_WT_VS_IL2_KO_CD4_TCELL_SCURFY_MOUSE_DN	0.0156472	0.0903634	0.315002	1.42456	10	170
GO_LYMPHOCYTE_ACTIVATION_INVOLVED_IN_IMMUNE_RESPONSE	0.0461049	0.186978	0.369378	1.424	28	62
GSE22886_NAIVE_BCELL_VS_DC_UP	0.0230061	0.118577	0.336063	1.42342	14	111
GO_ALPHA_AMINO_ACID_METABOLIC_PROCESS	0.0147059	0.0867628	0.325019	1.4234	9	139
GSE30971_CTRL_VS_LPS_STIM_MACROPHAGE_WBP7_HET_4H_DN	0.020202	0.108211	0.318098	1.42322	13	158
GSE28726_NAIVE_CD4_TCELL_VS_NAIVE_NKTCELL_UP	0.0159652	0.0916455	0.317898	1.42265	10	159
GSE16385_MONOCYTE_VS_MACROPHAGE_DN	0.0373832	0.161599	0.350087	1.42187	23	83
SESTO_RESPONSE_TO_UV_C7	0.0422764	0.176097	0.377898	1.4217	25	52
GSE16385_MONOCYTE_VS_12H_ROSIGLITAZONE_IL4_TREATED_MACROPHAGE_UP	0.0161765	0.0922252	0.324528	1.42125	10	139
TONG_INTERACT_WITH_PTTG1	0.0618729	0.225306	0.397619	1.42078	36	40
GSE12392_CD8A_POS_VS_NEG_SPLEEN_DC_UP	0.014556	0.0862974	0.318788	1.42066	9	154
TONKS_TARGETS_OF_RUNX1_RUNX1T1_FUSION_SUSTAINDED_IN_ERYTHROCYTE_UP	0.078727	0.262652	0.444784	1.41963	46	25
GO_ALCOHOL_BIOSYNTHETIC_PROCESS	0.0384615	0.164563	0.365034	1.41956	23	66
GSE21927_SPLEEN_C57BL6_VS_4T1_TUMOR_BALBC_MONOCYTES_DN	0.0146199	0.0864843	0.319418	1.41945	9	153
GO_POSITIVE_REGULATION_OF_LEUKOCYTE_MEDIATED_IMMUNITY	0.0504886	0.197799	0.385136	1.41888	30	46
chr5q31	0.03698	0.160483	0.344228	1.41879	23	92
PURBEY_TARGETS_OF_CTBP1_AND_SATB1_UP	0.0385233	0.164774	0.373989	1.41849	23	58
GSE16522_MEMORY_VS_NAIVE_ANTI_CD3CD28_STIM_CD8_TCELL_DN	0.0147275	0.0868522	0.322678	1.41832	9	143
GSE39110_UNTREATED_VS_IL2_TREATED_CD8_TCELL_DAY6_POST_IMMUNIZATION_UP	0.0161765	0.0922252	0.320523	1.41782	10	150
HUMMERICH_SKIN_CANCER_PROGRESSION_UP	0.0485437	0.193389	0.370906	1.41768	29	61
GSE2770_TGFB_AND_IL4_VS_TGFB_AND_IL12_TREATED_ACT_CD4_TCELL_6H_UP	0.0372093	0.161258	0.336082	1.41728	23	106
GO_RIBONUCLEOPROTEIN_COMPLEX_BIOGENESIS	0.00505051	0.0411141	0.285609	1.41713	3	396
ZHAN_MULTIPLE_MYELOMA_HP_UP	0.0710744	0.245401	0.414486	1.41691	42	32
GO_IMPORT_INTO_CELL	0.0830389	0.270793	0.477038	1.41689	46	19
GSE22140_GERMFREE_VS_SPF_ARTHRITIC_MOUSE_CD4_TCELL_UP	0.0176211	0.0983241	0.321765	1.41649	11	144
RAGHAVACHARI_PLATELET_SPECIFIC_GENES	0.0427892	0.177735	0.370691	1.41639	26	59
PAPASPYRIDONOS_UNSTABLE_ATEROSCLEROTIC_PLAQUE_UP	0.0439024	0.181233	0.386223	1.41634	26	45
GSE17974_0H_VS_6H_IN_VITRO_ACT_CD4_TCELL_DN	0.0158273	0.0911108	0.31626	1.41628	10	157
CROMER_TUMORIGENESIS_DN	0.0791367	0.263141	0.504343	1.41581	43	16
GSE7460_FOXP3_MUT_VS_HET_ACT_TCONV_UP	0.0324575	0.14691	0.337429	1.41566	20	103
GSE37534_GW1929_VS_PIOGLITAZONE_TREATED_CD4_TCELL_PPARG1_FOXP3_TRANSDUCED_UP	0.0335366	0.150571	0.337631	1.41532	21	101
GSE43955_TGFB_IL6_VS_TGFB_IL6_IL23_TH17_ACT_CD4_TCELL_60H_UP	0.0161765	0.0922252	0.319931	1.4152	10	150
MODULE_81	0.0830389	0.270793	0.476394	1.41498	46	19
MODY_HIPPOCAMPUS_NEONATAL	0.0815308	0.268062	0.437009	1.41487	48	26
GSE24634_NAIVE_CD4_TCELL_VS_DAY3_IL4_CONV_TREG_UP	0.0197269	0.106476	0.328837	1.4148	12	125
GSE39820_CTRL_VS_TGFBETA1_IL6_CD4_TCELL_DN	0.0186782	0.102343	0.315202	1.41467	12	160
GSE36392_TYPE_2_MYELOID_VS_NEUTROPHIL_IL25_TREATED_LUNG_DN	0.018598	0.102071	0.313667	1.41458	12	169
GSE24102_GRANULOCYSTIC_MDSC_VS_NEUTROPHIL_DN	0.016129	0.0920725	0.323676	1.41453	10	138
GSE21033_CTRL_VS_POLYIC_STIM_DC_12H_UP	0.0196078	0.106004	0.328175	1.4143	12	126
GSE46606_UNSTIM_VS_CD40L_IL2_IL5_1DAY_STIMULATED_IRF4HIGH_SORTED_BCELL_UP	0.0351682	0.154881	0.344758	1.41411	22	88
GSE43955_TGFB_IL6_VS_TGFB_IL6_IL23_TH17_ACT_CD4_TCELL_52H_UP	0.021148	0.111756	0.327084	1.41386	13	129
GSE33162_HDAC3_KO_VS_HDAC3_KO_MACROPHAGE_UP	0.0226929	0.117324	0.3285	1.41372	14	127
GO_NUCLEOTIDE_PHOSPHORYLATION	0.0746269	0.254302	0.400389	1.41322	44	37
FONTAINE_FOLLICULAR_THYROID_ADENOMA_DN	0.0533118	0.204596	0.387614	1.41311	32	43
GSE7459_UNTREATED_VS_IL6_TREATED_ACT_CD4_TCELL_DN	0.0444079	0.182868	0.375988	1.41294	26	53
GSE29618_MONOCYTE_VS_MDC_DAY7_FLU_VACCINE_DN	0.0176471	0.0984276	0.319346	1.41261	11	150
GSE19941_LPS_VS_LPS_AND_IL10_STIM_IL10_KO_NFKBP50_KO_MACROPHAGE_DN	0.0208024	0.110147	0.324871	1.41252	13	135
GSE17721_LPS_VS_GARDIQUIMOD_16H_BMDC_UP	0.0178571	0.0993508	0.322367	1.41163	11	141
GSE1460_INTRATHYMIC_T_PROGENITOR_VS_DP_THYMOCYTE_UP	0.0288754	0.13692	0.331091	1.4116	18	116
GSE14000_4H_VS_16H_LPS_DC_UP	0.0205279	0.109212	0.319308	1.41104	13	147
GSE9509_LPS_VS_LPS_AND_IL10_STIM_IL10_KO_MACROPHAGE_30MIN_UP	0.0290965	0.137303	0.33171	1.41082	18	115
MODULE_433	0.0791738	0.263141	0.466141	1.41057	45	20
GSE23502_BM_VS_COLON_TUMOR_HDC_KO_MYELOID_DERIVED_SUPPRESSOR_CELL_UP	0.0528846	0.203432	0.385592	1.41	32	44
GSE3720_UNSTIM_VS_LPS_STIM_VD2_GAMMADELTA_TCELL_DN	0.0362776	0.158463	0.356649	1.40995	22	72
BOYAULT_LIVER_CANCER_SUBCLASS_G3_DN	0.071066	0.245401	0.451512	1.40982	41	23
GSE11924_TH1_VS_TH2_CD4_TCELL_DN	0.0257576	0.12769	0.328731	1.40973	16	121
KEGG_PYRIMIDINE_METABOLISM	0.0358255	0.156898	0.346977	1.40942	22	84
GO_EPITHELIAL_CELL_APOPTOTIC_PROCESS	0.0865724	0.277301	0.474514	1.4094	48	19
GSE24142_EARLY_THYMIC_PROGENITOR_VS_DN3_THYMOCYTE_UP	0.0199715	0.107363	0.312631	1.4094	13	162
GNF2_PA2G4	0.0389408	0.166347	0.35059	1.40939	24	77
CAMPS_COLON_CANCER_COPY_NUMBER_DN	0.0791738	0.263141	0.465646	1.40907	45	20
GSE12366_NAIVE_VS_MEMORY_BCELL_DN	0.0222883	0.115904	0.324679	1.40873	14	132
GO_SMOOTH_ENDOPLASMIC_RETICULUM	0.071066	0.245401	0.451153	1.4087	41	23
STK33_SKM_UP	0.0166667	0.0945363	0.307474	1.40839	11	187
GSE21927_SPLEEN_C57BL6_VS_4T1_TUMOR_BALBC_MONOCYTES_UP	0.017341	0.0970851	0.314779	1.40819	11	156
GSE25123_CTRL_VS_ROSIGLITAZONE_STIM_PPARG_KO_MACROPHAGE_DN	0.0209895	0.111006	0.325148	1.40758	13	130
GSE21670_STAT3_KO_VS_WT_CD4_TCELL_TGFB_IL6_TREATED_UP	0.0174672	0.0977099	0.315683	1.40683	11	154
ZHANG_PROLIFERATING_VS_QUIESCENT	0.0544872	0.207448	0.384718	1.4068	33	44
GSE30083_SP2_VS_SP3_THYMOCYTE_DN	0.0351682	0.154881	0.336462	1.40645	22	100
MODULE_430	0.0504065	0.197704	0.373751	1.40609	30	52
GSE40274_XBP1_VS_FOXP3_AND_XBP1_TRANSDUCED_ACTIVATED_CD4_TCELL_UP	0.0242165	0.122502	0.312039	1.40531	16	161
GSE41867_LCMV_ARMSTRONG_VS_CLONE13_DAY8_EFFECTOR_CD8_TCELL_UP	0.0213675	0.112459	0.311855	1.40516	14	167
KEGG_DILATED_CARDIOMYOPATHY	0.0581583	0.216787	0.386399	1.40515	35	42
GSE43863_DAY6_EFF_VS_DAY150_MEM_LY6C_INT_CXCR5POS_CD4_TCELL_DN	0.0242165	0.122502	0.311995	1.40511	16	161
GSE27241_WT_CTRL_VS_DIGOXIN_TREATED_RORGT_KO_CD4_TCELL_IN_TH17_POLARIZING_CONDITIONS_DN	0.0160819	0.091921	0.316182	1.40507	10	153
GSE39864_WT_VS_GATA3_KO_TREG_UP	0.0241327	0.122382	0.325965	1.40478	15	126
SENESE_HDAC2_TARGETS_DN	0.0451613	0.184437	0.371448	1.40472	27	56
GSE35685_CD34POS_CD38NEG_VS_CD34POS_CD10NEG_CD62LPOS_BONE_MARROW_DN	0.0266272	0.13012	0.323063	1.40468	17	133
GATAAGR_V$GATA_C	0.0242792	0.122634	0.326941	1.40465	15	124
GSE45365_NK_CELL_VS_CD11B_DC_MCMV_INFECTION_DN	0.017341	0.0970851	0.313877	1.40416	11	156
GSE17721_CPG_VS_GARDIQUIMOD_12H_BMDC_DN	0.0205279	0.109212	0.3177	1.40393	13	147
GSE45365_HEALTHY_VS_MCMV_INFECTION_CD8A_DC_DN	0.0218978	0.114274	0.31798	1.4036	14	146
REACTOME_PYRIMIDINE_METABOLISM	0.0857143	0.275982	0.489554	1.40328	47	17
LEE_AGING_NEOCORTEX_DN	0.0581583	0.216787	0.385715	1.40266	35	42
KEGG_REGULATION_OF_AUTOPHAGY	0.078853	0.262876	0.483494	1.40232	43	18
GNF2_SPI1	0.0834697	0.271632	0.425788	1.40214	50	27
GSE3982_MAST_CELL_VS_BASOPHIL_UP	0.030303	0.140926	0.32738	1.40208	19	120
KEGG_HYPERTROPHIC_CARDIOMYOPATHY_HCM	0.0581583	0.216787	0.385553	1.40207	35	42
GO_MICROVILLUS_ORGANIZATION	0.0892857	0.282249	0.489067	1.40188	49	17
FERNANDEZ_BOUND_BY_MYC	0.0207715	0.110027	0.322182	1.40129	13	137
MORF_AP3D1	0.025641	0.127254	0.325085	1.40099	16	126
GSE7460_WT_VS_FOXP3_HET_ACT_WITH_TGFB_TCONV_DN	0.0287879	0.136732	0.326673	1.40091	18	121
GSE36078_WT_VS_IL1R_KO_LUNG_DC_AFTER_AD5_INF_UP	0.0219941	0.114597	0.319417	1.4007	14	140
GO_CALCIUM_DEPENDENT_PROTEIN_BINDING	0.079661	0.264384	0.410753	1.40043	46	33
GSE9037_WT_VS_IRAK4_KO_BMDM_DN	0.0353846	0.155629	0.331411	1.40043	22	108
GO_REGULATION_OF_VIRAL_GENOME_REPLICATION	0.0529801	0.203623	0.373475	1.39953	31	54
CHANG_IMMORTALIZED_BY_HPV31_DN	0.0760331	0.256544	0.398079	1.39949	45	36
GO_REGULATION_OF_CYTOKINE_PRODUCTION_INVOLVED_IN_IMMUNE_RESPONSE	0.0826446	0.27013	0.409207	1.39886	49	32
GO_NEGATIVE_REGULATION_OF_FIBROBLAST_PROLIFERATION	0.0862069	0.276768	0.452916	1.3988	49	22
GSE30962_PRIMARY_VS_SECONDARY_CHRONIC_LCMV_INF_CD8_TCELL_DN	0.0318665	0.145466	0.327705	1.39871	20	117
GSE13485_CTRL_VS_DAY7_YF17D_VACCINE_PBMC_UP	0.0368664	0.160197	0.336387	1.39862	23	97
GREENBAUM_E2A_TARGETS_DN	0.0926916	0.28865	0.505034	1.39822	51	15
GSE24210_RESTING_TREG_VS_TCONV_DN	0.0227273	0.117411	0.30969	1.39805	15	168
GSE36888_STAT5_AB_KNOCKIN_VS_WT_TCELL_IL2_TREATED_2H_DN	0.02526	0.12583	0.321483	1.39779	16	135
GO_REGULATION_OF_PROTEOLYSIS	0.00493827	0.0408721	0.278041	1.39746	3	450
GSE4748_CTRL_VS_CYANOBACTERIUM_LPSLIKE_STIM_DC_1H_UP	0.0205882	0.109403	0.315919	1.39745	13	150
GSE13306_RA_VS_UNTREATED_TCONV_DN	0.0369231	0.160326	0.335534	1.39734	23	98
GSE25087_FETAL_VS_ADULT_TCONV_UP	0.0219941	0.114597	0.316181	1.39722	14	147
GSE24726_WT_VS_E2-2_KO_PDC_DAY4_POST_DELETION_UP	0.0227596	0.117533	0.309892	1.39718	15	166
GO_REGULATION_OF_ACTIN_FILAMENT_DEPOLYMERIZATION	0.0834697	0.271632	0.424245	1.39706	50	27
GSE3982_BCELL_VS_NKCELL_UP	0.0268256	0.130613	0.321923	1.39704	17	131
GO_RESPONSE_TO_INTERLEUKIN_4	0.090106	0.28397	0.470253	1.39674	50	19
GO_DETECTION_OF_BIOTIC_STIMULUS	0.0944742	0.29216	0.504469	1.39666	52	15
GSE32423_MEMORY_VS_NAIVE_CD8_TCELL_IL7_IL4_UP	0.0466989	0.188643	0.361562	1.39653	28	65
GSE37301_HEMATOPOIETIC_STEM_CELL_VS_CD4_TCELL_UP	0.0233918	0.119688	0.315414	1.39644	15	149
MUNSHI_MULTIPLE_MYELOMA_UP	0.0496795	0.196465	0.359056	1.39632	30	66
GRAHAM_CML_DIVIDING_VS_NORMAL_QUIESCENT_DN	0.0532258	0.204333	0.369006	1.39616	32	55
GO_REGULATION_OF_INNATE_IMMUNE_RESPONSE	0.00807537	0.0572534	0.293957	1.39593	5	262
GSE2770_IL12_VS_TGFB_AND_IL12_TREATED_ACT_CD4_TCELL_48H_UP	0.0232221	0.119312	0.311924	1.39592	15	159
GSE15930_STIM_VS_STIM_AND_IFNAB_24H_CD8_T_CELL_UP	0.0222552	0.115777	0.320819	1.39536	14	137
ZUCCHI_METASTASIS_DN	0.0748752	0.254536	0.413349	1.39506	44	31
ERB2_UP.V1_UP	0.0419907	0.175234	0.331355	1.39502	26	105
REACTOME_GLUTATHIONE_CONJUGATION	0.0917266	0.2871	0.496647	1.39421	50	16
BURTON_ADIPOGENESIS_6	0.0219941	0.114597	0.315492	1.39418	14	147
MTOR_UP.N4.V1_UP	0.0218978	0.114274	0.315807	1.39401	14	146
GO_MYELOID_CELL_DIFFERENTIATION	0.0265096	0.129877	0.317124	1.3939	17	143
GSE41867_DAY6_EFFECTOR_VS_DAY30_EXHAUSTED_CD8_TCELL_LCMV_CLONE13_UP	0.0237741	0.120951	0.320471	1.39377	15	136
MODULE_281	0.0887772	0.281707	0.436537	1.3933	52	25
GO_T_CELL_DIFFERENTIATION_INVOLVED_IN_IMMUNE_RESPONSE	0.0843373	0.273457	0.460381	1.39314	48	20
GSE16385_UNTREATED_VS_12H_IL4_TREATED_MACROPHAGE_UP	0.0417311	0.174259	0.332045	1.39307	26	103
GO_REGULATION_OF_PROTEIN_BINDING	0.0290076	0.137191	0.325155	1.39258	18	122
MODULE_208	0.0564516	0.212747	0.360999	1.39255	34	64
GO_IMMUNE_EFFECTOR_PROCESS	0.0078534	0.0559911	0.289499	1.39249	5	284
GO_PROTEIN_SECRETION	0.0481541	0.192429	0.367931	1.39227	29	57
GOLDRATH_HOMEOSTATIC_PROLIFERATION	0.0218978	0.114274	0.315383	1.39214	14	146
CHARAFE_BREAST_CANCER_LUMINAL_VS_BASAL_DN	0.011889	0.0750075	0.290547	1.3919	8	274
GO_REGULATION_OF_CYSTEINE_TYPE_ENDOPEPTIDASE_ACTIVITY	0.0219941	0.114597	0.314926	1.39168	14	147
GO_REGULATION_OF_LYASE_ACTIVITY	0.0802676	0.265803	0.420833	1.39114	47	28
GSE8868_SPLEEN_VS_INTESTINE_CD11B_POS_CD11C_NEG_DC_DN	0.0316742	0.144984	0.322739	1.39088	20	126
GSE20366_CD103_POS_VS_CD103_KLRG1_DP_TREG_DN	0.0336907	0.15101	0.326866	1.39022	21	115
FLECHNER_PBL_KIDNEY_TRANSPLANT_OK_VS_DONOR_UP	0.0282318	0.135195	0.3202	1.39007	18	134
GSE30083_SP2_VS_SP4_THYMOCYTE_DN	0.0297177	0.138977	0.320152	1.38986	19	134
GSE27786_LSK_VS_NKCELL_DN	0.0272989	0.132195	0.30967	1.38984	18	160
GSE42021_TREG_VS_TCONV_PLN_UP	0.02526	0.12583	0.319652	1.38982	16	135
BHATI_G2M_ARREST_BY_2METHOXYESTRADIOL_DN	0.0518053	0.200375	0.34328	1.38948	32	80
GSE17721_0.5H_VS_24H_PAM3CSK4_BMDC_UP	0.0255682	0.126975	0.307777	1.38942	17	168
MEISSNER_NPC_HCP_WITH_H3K4ME3_AND_H3K27ME3	0.0780731	0.261034	0.392118	1.38903	46	38
GO_MUSCLE_SYSTEM_PROCESS	0.0349014	0.154315	0.325423	1.38897	22	117
GO_MYELOID_LEUKOCYTE_ACTIVATION	0.0503937	0.197704	0.351821	1.38886	31	71
GSE27859_MACROPHAGE_VS_CD11C_INT_F480_INT_DC_UP	0.0288754	0.13692	0.323609	1.38827	18	123
GSE2826_WT_VS_XID_BCELL_DN	0.0273141	0.132221	0.322666	1.38825	17	125
GSE35685_CD34POS_CD10NEG_CD62LPOS_VS_CD34POS_CD10POS_BONE_MARROW_DN	0.0285307	0.135897	0.307532	1.38735	19	163
MODULE_88	0.00761421	0.0546322	0.282864	1.38734	5	346
GO_RESPONSE_TO_AXON_INJURY	0.0860585	0.276491	0.458333	1.38694	49	20
GSE2405_S_AUREUS_VS_A_PHAGOCYTOPHILUM_NEUTROPHIL_UP	0.0366972	0.15967	0.326591	1.38669	23	114
GSE41867_DAY15_EFFECTOR_VS_DAY30_EXHAUSTED_CD8_TCELL_LCMV_CLONE13_UP	0.0281065	0.134898	0.315927	1.38646	18	142
GSE17186_NAIVE_VS_CD21LOW_TRANSITIONAL_BCELL_DN	0.0248538	0.124729	0.313151	1.38642	16	149
LEF1_UP.V1_UP	0.0445151	0.183197	0.347952	1.38631	27	75
ZHAN_MULTIPLE_MYELOMA_MS_DN	0.0819398	0.268812	0.419366	1.38629	48	28
GSE17301_IFNA2_VS_IFNA2_AND_ACD3_ACD28_STIM_CD8_TCELL_DN	0.0338462	0.151197	0.327649	1.38629	21	110
GSE23114_WT_VS_SLE2C1_MOUSE_SPLEEN_B1A_BCELL_UP	0.029872	0.139601	0.307474	1.38628	20	166
GO_CELLULAR_AMINO_ACID_BIOSYNTHETIC_PROCESS	0.0586371	0.217618	0.362801	1.38625	36	59
HOSHIDA_LIVER_CANCER_SUBCLASS_S3	0.0248175	0.124694	0.312548	1.38624	16	151
ZHANG_TLX_TARGETS_60HR_UP	0.0184397	0.101536	0.300729	1.38577	12	204
GSE26559_TCF1_KO_VS_WT_LIN_NEG_CELL_DN	0.0535433	0.204954	0.350969	1.38549	33	71
GSE17721_LPS_VS_CPG_0.5H_BMDC_DN	0.0306748	0.142112	0.327071	1.38533	19	111
GO_STRIATED_MUSCLE_CELL_DIFFERENTIATION	0.0512422	0.199466	0.342745	1.3853	32	79
MARTINEZ_RB1_TARGETS_DN	0.00768246	0.0549481	0.284236	1.38522	5	322
GSE5679_PPARG_LIGAND_ROSIGLITAZONE_VS_RARA_AGONIST_AM580_TREATED_DC_UP	0.0264706	0.129779	0.313651	1.3851	17	148
HUMMEL_BURKITTS_LYMPHOMA_UP	0.0965517	0.295608	0.453365	1.38454	55	21
GSE16385_IFNG_TNF_VS_IL4_STIM_MACROPHAGE_ROSIGLITAZONE_TREATED_UP	0.0493066	0.195458	0.335891	1.38443	31	92
GO_ASTROCYTE_DIFFERENTIATION	0.0965517	0.295608	0.453299	1.38434	55	21
DACOSTA_UV_RESPONSE_VIA_ERCC3_UP	0.014966	0.0877316	0.293109	1.38428	10	248
PENG_GLUCOSE_DEPRIVATION_DN	0.0325444	0.147154	0.31836	1.38423	21	133
GSE24292_WT_VS_PPARG_KO_MACROPHAGE_UP	0.0225035	0.116525	0.304369	1.3842	15	176
GSE2826_WT_VS_BTK_KO_BCELL_DN	0.03177	0.145174	0.321631	1.38416	20	127
LEF1_UP.V1_DN	0.0540123	0.206228	0.339333	1.38399	34	86
HOSHIDA_LIVER_CANCER_SURVIVAL_UP	0.0662359	0.23505	0.380572	1.38396	40	42
GSE17721_12H_VS_24H_LPS_BMDC_UP	0.0262774	0.129212	0.312008	1.38385	17	151
GSE40666_STAT1_KO_VS_STAT4_KO_CD8_TCELL_DN	0.0643564	0.230769	0.373341	1.38366	38	49
GSE36009_WT_VS_NLRP10_KO_DC_UP	0.0235294	0.120117	0.312794	1.38363	15	150
FULCHER_INFLAMMATORY_RESPONSE_LECTIN_VS_LPS_UP	0.00869565	0.0602926	0.277657	1.38363	6	412
PLASARI_TGFB1_SIGNALING_VIA_NFIC_1HR_UP	0.0936396	0.290673	0.465744	1.38335	52	19
REACTOME_MITOTIC_G1_G1_S_PHASES	0.0288316	0.136891	0.321906	1.38302	18	124
GSE36888_STAT5_AB_KNOCKIN_VS_WT_TCELL_IL2_TREATED_2H_UP	0.0294551	0.138239	0.314418	1.38201	19	143
GO_STRUCTURAL_CONSTITUENT_OF_CYTOSKELETON	0.0627063	0.227289	0.372813	1.3817	37	48
GO_NUCLEOSIDE_DIPHOSPHATE_METABOLIC_PROCESS	0.057947	0.21638	0.368699	1.38163	34	54
GSE10325_BCELL_VS_LUPUS_BCELL_DN	0.0258993	0.12806	0.30852	1.38162	17	157
GSE360_CTRL_VS_T_GONDII_DC_DN	0.0347958	0.154104	0.320999	1.38144	22	127
GO_SULFUR_COMPOUND_BIOSYNTHETIC_PROCESS	0.0319149	0.145637	0.322005	1.38138	20	123
GSE10239_NAIVE_VS_KLRG1INT_EFF_CD8_TCELL_DN	0.0263158	0.129212	0.310833	1.3813	17	153
MODULE_233	0.0982759	0.298083	0.452234	1.38109	56	21
GSE17721_LPS_VS_POLYIC_4H_BMDC_DN	0.0269886	0.131168	0.305914	1.38101	18	168
GO_APOPTOTIC_MITOCHONDRIAL_CHANGES	0.0678514	0.238442	0.37975	1.38097	41	42
GSE15930_NAIVE_VS_48H_IN_VITRO_STIM_IL12_CD8_TCELL_DN	0.0248619	0.124729	0.301639	1.38072	17	181
KEGG_SNARE_INTERACTIONS_IN_VESICULAR_TRANSPORT	0.0829103	0.270656	0.414696	1.38062	48	30
GSE36826_NORMAL_VS_STAPH_AUREUS_INF_SKIN_DN	0.0232558	0.119312	0.309389	1.38051	15	155
LEE_AGING_NEOCORTEX_UP	0.0488959	0.194175	0.349139	1.38026	30	72
GSE3982_BCELL_VS_EFF_MEMORY_CD4_TCELL_UP	0.0326895	0.14766	0.317927	1.3802	21	134
GSE27434_WT_VS_DNMT1_KO_TREG_UP	0.0247093	0.12429	0.309272	1.37999	16	155
GSE22886_NAIVE_TCELL_VS_NEUTROPHIL_UP	0.0225035	0.116525	0.303139	1.37969	15	177
GO_RESPONSE_TO_ANTIBIOTIC	0.0847458	0.274449	0.402441	1.37962	49	34
GSE22886_CD4_TCELL_VS_BCELL_NAIVE_DN	0.0502283	0.197473	0.331631	1.37948	32	96
GO_POSITIVE_REGULATION_OF_TELOMERASE_RNA_LOCALIZATION_TO_CAJAL_BODY	0.0998217	0.300562	0.498264	1.37948	55	15
GO_REGULATION_OF_TELOMERASE_RNA_LOCALIZATION_TO_CAJAL_BODY	0.0998217	0.300562	0.498264	1.37948	55	15
GSE17721_POLYIC_VS_PAM3CSK4_8H_BMDC_DN	0.0242165	0.122502	0.306048	1.37946	16	165
GSE6269_FLU_VS_STREP_PNEUMO_INF_PBMC_DN	0.0478395	0.191401	0.333093	1.37888	30	93
GSE29618_LAIV_VS_TIV_FLU_VACCINE_DAY7_BCELL_DN	0.030303	0.140926	0.308119	1.37857	20	158
GSE4748_CTRL_VS_LPS_STIM_DC_3H_DN	0.0341753	0.152112	0.317689	1.3784	22	132
GNF2_INPP5D	0.0847458	0.274449	0.402076	1.37837	49	34
HUANG_GATA2_TARGETS_DN	0.0545746	0.207604	0.364207	1.37818	33	57
GO_CELLULAR_MODIFIED_AMINO_ACID_METABOLIC_PROCESS	0.030349	0.141091	0.320314	1.37813	19	125
GO_ALPHA_AMINO_ACID_BIOSYNTHETIC_PROCESS	0.0645161	0.23097	0.364153	1.3778	39	55
GNF2_ITGB2	0.0666667	0.235953	0.366165	1.37756	40	52
GSE3565_CTRL_VS_LPS_INJECTED_SPLENOCYTES_DN	0.0307918	0.142604	0.314125	1.37749	20	140
GSE40274_FOXP3_VS_FOXP3_AND_PBX1_TRANSDUCED_ACTIVATED_CD4_TCELL_UP	0.0341753	0.152112	0.31728	1.3774	22	134
chr8q12	0.101604	0.303271	0.497476	1.3773	56	15
GSE21360_NAIVE_VS_PRIMARY_MEMORY_CD8_TCELL_DN	0.0291121	0.137303	0.309026	1.37716	19	154
GO_REGULATION_OF_HUMORAL_IMMUNE_RESPONSE	0.0949821	0.292933	0.474728	1.3769	52	18
GO_NEGATIVE_REGULATION_OF_NUCLEOTIDE_METABOLIC_PROCESS	0.0965058	0.295608	0.425255	1.37681	57	26
GO_RUFFLE_ORGANIZATION	0.0949821	0.292933	0.474687	1.37678	52	18
GO_NEGATIVE_REGULATION_OF_LEUKOCYTE_MEDIATED_IMMUNITY	0.0921273	0.287763	0.431328	1.37668	54	25
GSE17721_LPS_VS_PAM3CSK4_24H_BMDC_UP	0.0263158	0.129212	0.309761	1.37653	17	153
GO_NEGATIVE_REGULATION_OF_CATALYTIC_ACTIVITY	0.00489596	0.040673	0.272926	1.37631	3	480
ZHONG_SECRETOME_OF_LUNG_CANCER_AND_ENDOTHELIUM	0.0643564	0.230769	0.371292	1.37606	38	49
TSENG_IRS1_TARGETS_DN	0.0576324	0.215782	0.344924	1.37604	36	74
MODULE_145	0.0596774	0.220189	0.356712	1.37601	36	64
SABATES_COLORECTAL_ADENOMA_UP	0.0775444	0.259809	0.377391	1.37584	47	43
GO_CHEMICAL_HOMEOSTASIS	0.00745342	0.053828	0.27452	1.3753	5	434
LANDIS_ERBB2_BREAST_TUMORS_324_DN	0.0463679	0.187873	0.327768	1.37513	29	103
GSE17721_0.5H_VS_24H_GARDIQUIMOD_BMDC_UP	0.0313837	0.143999	0.304994	1.37497	21	162
GSE17721_LPS_VS_PAM3CSK4_16H_BMDC_UP	0.030303	0.140926	0.307273	1.37479	20	158
GSE18281_SUBCAPSULAR_VS_PERIMEDULLARY_CORTICAL_REGION_OF_THYMUS_DN	0.0320122	0.145981	0.323991	1.37474	20	112
GSE22886_NEUTROPHIL_VS_DC_UP	0.0498442	0.196592	0.341869	1.37433	31	77
GSE38697_LIGHT_ZONE_VS_DARK_ZONE_BCELL_DN	0.0827703	0.270408	0.416859	1.37424	48	29
GSE11961_MARGINAL_ZONE_BCELL_VS_MEMORY_BCELL_DAY40_UP	0.0357675	0.156768	0.316634	1.37409	23	131
GNF2_CD48	0.0921273	0.287763	0.430473	1.37395	54	25
GSE25123_CTRL_VS_IL4_STIM_MACROPHAGE_UP	0.0282738	0.13524	0.313756	1.37392	18	141
REACTOME_ANTIGEN_PROCESSING_UBIQUITINATION_PROTEASOME_DEGRADATION	0.0265734	0.130118	0.302209	1.37385	18	173
GSE21063_CTRL_VS_ANTI_IGM_STIM_BCELL_8H_UP	0.0559758	0.21155	0.328266	1.37366	36	99
GSE19923_WT_VS_E2A_KO_DP_THYMOCYTE_UP	0.0446154	0.1834	0.324588	1.37329	28	109
GSE369_IFNG_KO_VS_WT_LIVER_DN	0.0284091	0.135559	0.304176	1.37316	19	168
DAZARD_RESPONSE_TO_UV_NHEK_UP	0.0312057	0.143484	0.304371	1.37309	21	164
GSE12845_NAIVE_VS_DARKZONE_GC_TONSIL_BCELL_DN	0.0286123	0.136237	0.304444	1.37298	19	169
GSE15624_CTRL_VS_6H_HALOFUGINONE_TREATED_CD4_TCELL_UP	0.0535168	0.204921	0.334687	1.37281	34	88
GO_METAL_ION_TRANSPORT	0.0168776	0.0953287	0.295339	1.37266	11	222
GO_ACTIVE_ION_TRANSMEMBRANE_TRANSPORTER_ACTIVITY	0.0540541	0.206328	0.344524	1.37266	33	75
GSE1432_CTRL_VS_IFNG_6H_MICROGLIA_DN	0.0218978	0.114274	0.310901	1.37235	14	146
GO_T_CELL_HOMEOSTASIS	0.0919732	0.287618	0.415119	1.37225	54	28
REACTOME_CLASS_B_2_SECRETIN_FAMILY_RECEPTORS	0.1	0.300562	0.478727	1.37224	55	17
LINDGREN_BLADDER_CANCER_CLUSTER_2A_DN	0.0506912	0.198237	0.330026	1.37217	32	97
GO_POSITIVE_REGULATION_OF_IMMUNE_EFFECTOR_PROCESS	0.0524691	0.202159	0.331266	1.37131	33	93
GO_AUTOPHAGOSOME_MEMBRANE	0.101549	0.303174	0.453117	1.37116	58	20
GSE1460_DP_VS_CD4_THYMOCYTE_DN	0.0333839	0.150087	0.319143	1.37115	21	124
GSE17974_0H_VS_4H_IN_VITRO_ACT_CD4_TCELL_DN	0.0341753	0.152112	0.31574	1.37071	22	134
REACTOME_FORMATION_OF_TUBULIN_FOLDING_INTERMEDIATES_BY_CCT_TRIC	0.1	0.300562	0.478145	1.37057	55	17
GO_REGULATION_OF_DEFENSE_RESPONSE	0.00487211	0.0405251	0.27124	1.37053	3	487
GSE37532_TREG_VS_TCONV_PPARG_KO_CD4_TCELL_FROM_VISCERAL_ADIPOSE_TISSUE_UP	0.0278592	0.134153	0.310117	1.37043	18	147
GO_REGULATION_OF_MEMBRANE_POTENTIAL	0.0335878	0.150751	0.3211	1.37017	21	119
GO_POSITIVE_REGULATION_OF_PRODUCTION_OF_MOLECULAR_MEDIATOR_OF_IMMUNE_RESPONSE	0.0748752	0.254536	0.394436	1.36998	44	35
SARRIO_EPITHELIAL_MESENCHYMAL_TRANSITION_DN	0.0506912	0.198237	0.329416	1.36963	32	97
GO_RESPONSE_TO_INTERFERON_BETA	0.100707	0.301466	0.461036	1.36937	56	19
KEGG_GLUTATHIONE_METABOLISM	0.0826446	0.27013	0.389486	1.36928	49	36
HOFFMANN_PRE_BI_TO_LARGE_PRE_BII_LYMPHOCYTE_DN	0.0626003	0.227048	0.360939	1.36899	38	58
GO_POSITIVE_REGULATION_OF_T_CELL_MEDIATED_IMMUNITY	0.1	0.300562	0.477442	1.36856	55	17
DAZARD_RESPONSE_TO_UV_SCC_UP	0.0533537	0.204596	0.326467	1.36852	34	101
GO_CARDIAC_VENTRICLE_MORPHOGENESIS	0.103448	0.306382	0.447991	1.36813	59	21
GSE45365_WT_VS_IFNAR_KO_CD8A_DC_DN	0.0248175	0.124694	0.309822	1.36759	16	146
GSE17721_12H_VS_24H_CPG_BMDC_UP	0.0320611	0.146105	0.319304	1.36753	20	122
GO_SKELETAL_MUSCLE_ORGAN_DEVELOPMENT	0.0645161	0.23097	0.354496	1.36746	39	64
GO_NEGATIVE_REGULATION_OF_VIRAL_PROCESS	0.0647249	0.231299	0.357723	1.3673	39	61
GSE17721_POLYIC_VS_GARDIQUIMOD_24H_BMDC_DN	0.0295775	0.138466	0.300571	1.36695	20	175
GSE11057_CD4_CENT_MEM_VS_PBMC_DN	0.0368189	0.160043	0.310922	1.36664	24	143
GSE45365_NK_CELL_VS_CD8_TCELL_MCMV_INFECTION_UP	0.0312945	0.143639	0.303116	1.36663	21	166
GO_CELLULAR_RESPONSE_TO_MECHANICAL_STIMULUS	0.0645695	0.231099	0.364481	1.36582	38	54
GSE6259_FLT3L_INDUCED_VS_WT_SPLENIC_DC_33D1_POS_UP	0.0294118	0.138174	0.309192	1.36541	19	148
DANG_REGULATED_BY_MYC_DN	0.0262431	0.12914	0.297932	1.36511	18	184
GARGALOVIC_RESPONSE_TO_OXIDIZED_PHOSPHOLIPIDS_MAGENTA_UP	0.106897	0.312717	0.446999	1.3651	61	21
GO_HYDROLASE_ACTIVITY_ACTING_ON_CARBON_NITROGEN_BUT_NOT_PEPTIDE_BONDS	0.058642	0.217618	0.329726	1.36494	37	93
chr2q14	0.103943	0.307438	0.47059	1.3649	57	18
GO_NEGATIVE_REGULATION_OF_RECEPTOR_ACTIVITY	0.106115	0.311316	0.486188	1.36484	58	16
LEE_BMP2_TARGETS_UP	0.0101138	0.0669994	0.275215	1.36484	7	395
GSE11057_NAIVE_CD4_VS_PBMC_CD4_TCELL_DN	0.0328103	0.147987	0.302521	1.36474	22	163
REACTOME_INSULIN_RECEPTOR_RECYCLING	0.106115	0.311316	0.485949	1.36417	58	16
MULLIGHAN_MLL_SIGNATURE_1_UP	0.0143979	0.0857018	0.283147	1.36403	10	301
GO_DEFENSE_RESPONSE_TO_OTHER_ORGANISM	0.0163934	0.0933428	0.288889	1.3639	11	249
GO_SPHINGOLIPID_METABOLIC_PROCESS	0.0625	0.226787	0.3323	1.36371	40	87
GO_REGULATION_OF_CATION_CHANNEL_ACTIVITY	0.0748752	0.254536	0.392516	1.36331	44	35
GSE4142_PLASMA_CELL_VS_MEMORY_BCELL_DN	0.0458716	0.186257	0.320998	1.36294	29	114
GSE3982_MAST_CELL_VS_CENT_MEMORY_CD4_TCELL_UP	0.0342368	0.152233	0.302276	1.36272	23	162
KAMIKUBO_MYELOID_MN1_NETWORK	0.105357	0.310113	0.47526	1.3623	58	17
GO_REGULATION_OF_T_CELL_RECEPTOR_SIGNALING_PATHWAY	0.101523	0.303163	0.436036	1.3615	59	23
GSE19772_CTRL_VS_HCMV_INF_MONOCYTES_DN	0.0563166	0.212379	0.3273	1.36146	36	96
GO_NCRNA_PROCESSING	0.00890585	0.0611812	0.277914	1.3614	6	344
MODULE_292	0.0628931	0.227658	0.342828	1.36129	39	73
GSE22886_CTRL_VS_LPS_24H_DC_DN	0.0306569	0.142078	0.308356	1.36112	20	146
GSE32164_ALTERNATIVELY_ACT_M2_VS_CMYC_INHIBITED_MACROPHAGE_DN	0.0316092	0.144885	0.303228	1.36092	21	160
GSE13522_CTRL_VS_T_CRUZI_Y_STRAIN_INF_SKIN_IFNG_KO_UP	0.0377074	0.162479	0.315779	1.36088	24	126
GO_MYELOID_LEUKOCYTE_MIGRATION	0.0709677	0.245401	0.359602	1.36058	43	55
GSE22886_CTRL_VS_LPS_24H_DC_UP	0.0281294	0.134898	0.299165	1.36053	19	176
GSE17974_2H_VS_72H_UNTREATED_IN_VITRO_CD4_TCELL_DN	0.0342368	0.152233	0.30171	1.36016	23	162
GO_REGULATION_OF_INTERFERON_GAMMA_PRODUCTION	0.0723684	0.248991	0.361925	1.36009	43	53
REACTOME_TGF_BETA_RECEPTOR_SIGNALING_ACTIVATES_SMADS	0.103215	0.306097	0.435546	1.35996	60	23
GO_IMMUNOLOGICAL_SYNAPSE	0.102041	0.304167	0.431196	1.35995	59	24
KEGG_STARCH_AND_SUCROSE_METABOLISM	0.104907	0.309332	0.435464	1.35971	61	23
GSE43260_BTLA_POS_VS_NEG_INTRATUMORAL_CD8_TCELL_UP	0.0306407	0.142052	0.297949	1.35947	21	178
GSE12366_PLASMA_CELL_VS_MEMORY_BCELL_UP	0.0364188	0.158976	0.315973	1.35945	23	125
GSE39820_CTRL_VS_TGFBETA3_IL6_CD4_TCELL_DN	0.0319303	0.145658	0.303769	1.35942	21	159
GSE6259_DEC205_POS_DC_VS_BCELL_DN	0.0350877	0.154833	0.306995	1.35916	23	149
GSE34156_NOD2_LIGAND_VS_NOD2_AND_TLR1_TLR2_LIGAND_6H_TREATED_MONOCYTE_DN	0.0457317	0.185915	0.320114	1.35905	29	113
GO_RESPONSE_TO_FATTY_ACID	0.0726073	0.249453	0.366516	1.35836	43	49
GO_ORGANOPHOSPHATE_BIOSYNTHETIC_PROCESS	0.0155844	0.0901174	0.280549	1.35812	11	309
PENG_RAPAMYCIN_RESPONSE_UP	0.0337739	0.151079	0.308472	1.35797	22	144
GSE46242_TH1_VS_ANERGIC_TH1_CD4_TCELL_WITH_EGR2_DELETED_UP	0.0416048	0.173895	0.312958	1.35788	27	132
GSE37532_VISCERAL_ADIPOSE_TISSUE_VS_LN_DERIVED_PPARG_KO_TCONV_CD4_TCELL_UP	0.0321168	0.146209	0.3059	1.35751	21	152
GO_REGULATION_OF_NEUROLOGICAL_SYSTEM_PROCESS	0.104907	0.309332	0.434717	1.35738	61	23
YANG_BREAST_CANCER_ESR1_BULK_UP	0.107143	0.313095	0.473508	1.35728	59	17
PID_CD8_TCR_PATHWAY	0.0946844	0.292742	0.383124	1.35717	56	38
MIKKELSEN_MEF_LCP_WITH_H3K4ME3	0.0685805	0.240132	0.346984	1.35709	42	67
GSE21670_UNTREATED_VS_IL6_TREATED_STAT3_KO_CD4_TCELL_UP	0.0323529	0.146781	0.307282	1.35698	21	148
GSE8621_LPS_STIM_VS_LPS_PRIMED_AND_LPS_STIM_MACROPHAGE_UP	0.0623053	0.226421	0.334098	1.35693	39	83
GO_POSITIVE_REGULATION_OF_ERK1_AND_ERK2_CASCADE	0.0700935	0.243633	0.339938	1.35615	44	74
HAHTOLA_MYCOSIS_FUNGOIDES_SKIN_UP	0.0400593	0.169448	0.311776	1.35603	26	137
GSE8921_UNSTIM_VS_TLR1_2_STIM_MONOCYTE_3H_DN	0.0365497	0.159391	0.306275	1.35597	24	149
GSE34217_MIR17_92_OVEREXPRESS_VS_WT_ACT_CD8_TCELL_UP	0.0628019	0.227451	0.351028	1.35585	38	65
GSE32901_TH1_VS_TH17_NEG_CD4_TCELL_DN	0.0628019	0.227451	0.35101	1.35578	38	65
GSE17721_0.5H_VS_4H_LPS_BMDC_UP	0.0326705	0.14766	0.300254	1.35546	22	168
GO_LATE_ENDOSOME	0.0321168	0.146209	0.305425	1.3554	21	152
OSMAN_BLADDER_CANCER_DN	0.0156047	0.0901956	0.279807	1.35521	11	310
GSE1448_CTRL_VS_ANTI_VBETA5_DP_THYMOCYTE_DN	0.0337739	0.151079	0.307811	1.35506	22	144
GO_REGULATION_OF_ION_HOMEOSTASIS	0.0576324	0.215782	0.333592	1.35505	36	84
POMEROY_MEDULLOBLASTOMA_DESMOPLASIC_VS_CLASSIC_UP	0.0901639	0.284085	0.379301	1.35495	54	39
GSE17721_0.5H_VS_12H_PAM3CSK4_BMDC_UP	0.0350365	0.15476	0.305442	1.35473	23	151
LABBE_WNT3A_TARGETS_DN	0.0764228	0.25747	0.369384	1.35459	46	45
GSE24574_BCL6_HIGH_TFH_VS_TFH_CD4_TCELL_DN	0.0342368	0.152233	0.300243	1.35447	23	163
GSE17721_CTRL_VS_GARDIQUIMOD_12H_BMDC_UP	0.0359195	0.157207	0.301766	1.35436	24	160
GSE24142_DN2_VS_DN3_THYMOCYTE_ADULT_UP	0.0409712	0.171945	0.317269	1.35417	26	117
GO_NEGATIVE_REGULATION_OF_PROTEIN_COMPLEX_ASSEMBLY	0.0673077	0.237155	0.348217	1.35417	41	66
GO_REGULATION_OF_CELLULAR_COMPONENT_SIZE	0.0253521	0.126196	0.293346	1.35407	17	208
GO_NEGATIVE_REGULATION_OF_MITOCHONDRION_ORGANIZATION	0.0942149	0.29183	0.395977	1.35363	56	32
JIANG_AGING_CEREBRAL_CORTEX_UP	0.0953177	0.293547	0.409279	1.35294	56	28
BOSCO_INTERFERON_INDUCED_ANTIVIRAL_MODULE	0.070626	0.244658	0.356654	1.35274	43	58
GO_NEGATIVE_REGULATION_OF_ACTIN_FILAMENT_DEPOLYMERIZATION	0.106713	0.312247	0.446986	1.35261	61	20
GO_NEGATIVE_REGULATION_OF_ANTIGEN_RECEPTOR_MEDIATED_SIGNALING_PATHWAY	0.108929	0.31579	0.471824	1.35245	60	17
MORF_PCNA	0.0600924	0.22105	0.332302	1.35235	38	81
GSE14413_UNSTIM_VS_IFNB_STIM_L929_CELLS_DN	0.0775444	0.259809	0.371866	1.3523	47	42
GSE24634_TEFF_VS_TCONV_DAY3_IN_CULTURE_DN	0.0439883	0.181531	0.308343	1.35213	29	140
GSE15330_LYMPHOID_MULTIPOTENT_VS_GRANULOCYTE_MONOCYTE_PROGENITOR_IKAROS_KO_DN	0.0323529	0.146781	0.305612	1.35186	21	150
GO_REGULATION_OF_PROTEIN_MODIFICATION_BY_SMALL_PROTEIN_CONJUGATION_OR_REMOVAL	0.0192572	0.104616	0.287511	1.35163	13	239
WANG_CLASSIC_ADIPOGENIC_TARGETS_OF_PPARG	0.108434	0.315318	0.446566	1.35133	62	20
GO_CELLULAR_RESPONSE_TO_KETONE	0.0858086	0.276048	0.364574	1.35117	51	48
GO_ALDITOL_PHOSPHATE_METABOLIC_PROCESS	0.111111	0.318908	0.465758	1.35088	61	18
LABBE_TGFB1_TARGETS_UP	0.0837438	0.272144	0.360506	1.35085	50	51
GSE22611_UNSTIM_VS_6H_MDP_STIM_NOD2_TRANSDUCED_HEK293T_CELL_DN	0.0401189	0.169592	0.311162	1.35083	26	134
GSE2770_TGFB_AND_IL4_ACT_VS_ACT_CD4_TCELL_48H_UP	0.0352423	0.155106	0.306849	1.35082	23	144
GSE12392_WT_VS_IFNB_KO_CD8A_POS_SPLEEN_DC_UP	0.0309423	0.143053	0.29675	1.34955	21	176
GSE15330_HSC_VS_GRANULOCYTE_MONOCYTE_PROGENITOR_IKAROS_KO_DN	0.0350365	0.15476	0.304268	1.34952	23	151
SERVITJA_LIVER_HNF1A_TARGETS_UP	0.0612245	0.223737	0.333375	1.34939	38	80
SMIRNOV_CIRCULATING_ENDOTHELIOCYTES_IN_CANCER_UP	0.0459418	0.18643	0.317228	1.34923	29	115
MODULE_245	0.0971524	0.296409	0.422639	1.34895	57	25
WIERENGA_STAT5A_TARGETS_UP	0.0394537	0.16798	0.313956	1.34886	25	124
WOO_LIVER_CANCER_RECURRENCE_UP	0.0802568	0.265803	0.356336	1.34839	49	57
GO_POSITIVE_REGULATION_OF_ACTIN_FILAMENT_BUNDLE_ASSEMBLY	0.107143	0.313095	0.427465	1.34818	62	24
GO_DEFENSE_RESPONSE_TO_GRAM_NEGATIVE_BACTERIUM	0.110155	0.317192	0.445522	1.34817	63	20
GO_CELL_CELL_ADHESION_VIA_PLASMA_MEMBRANE_ADHESION_MOLECULES	0.083612	0.271963	0.377296	1.34817	49	40
SAKAI_TUMOR_INFILTRATING_MONOCYTES_DN	0.0661417	0.234779	0.34283	1.34787	41	69
GSE12392_CD8A_POS_VS_NEG_SPLEEN_IFNB_KO_DC_UP	0.0398293	0.168742	0.298945	1.34783	27	166
MODULE_78	0.116906	0.329392	0.480098	1.34775	64	16
CHIARADONNA_NEOPLASTIC_TRANSFORMATION_KRAS_DN	0.0681115	0.23898	0.325279	1.34732	43	94
GSE15930_STIM_VS_STIM_AND_TRICHOSTATINA_24H_CD8_T_CELL_UP	0.065449	0.233124	0.323885	1.34726	42	96
GRADE_METASTASIS_DN	0.0869565	0.278174	0.377003	1.34712	51	40
GSE14908_RESTING_VS_HDM_STIM_CD4_TCELL_ATOPIC_PATIENT_UP	0.0388489	0.166061	0.300798	1.34703	26	157
GSE339_EX_VIVO_VS_IN_CULTURE_CD4POS_DC_UP	0.0323944	0.146785	0.296145	1.34682	22	175
KHETCHOUMIAN_TRIM24_TARGETS_UP	0.0848586	0.274568	0.387642	1.34638	50	35
GSE22601_DOUBLE_NEGATIVE_VS_DOUBLE_POSITIVE_THYMOCYTE_UP	0.0645161	0.23097	0.323766	1.34614	41	97
REACTOME_CELL_CYCLE_CHECKPOINTS	0.0538462	0.205828	0.31816	1.3461	34	109
CHEN_LUNG_CANCER_SURVIVAL	0.117857	0.331164	0.469514	1.34583	65	17
GO_RESPONSE_TO_ACID_CHEMICAL	0.0391872	0.16724	0.300717	1.34577	26	159
GNF2_NPM1	0.0749601	0.254536	0.344068	1.34568	46	67
GSE36891_UNSTIM_VS_PAM_TLR2_STIM_PERITONEAL_MACROPHAGE_UP	0.040404	0.170474	0.300701	1.34538	27	158
MODULE_221	0.0971524	0.296409	0.421379	1.34492	57	25
GO_ANCHORED_COMPONENT_OF_MEMBRANE	0.0961857	0.295404	0.380983	1.34472	57	37
REACTOME_LYSOSOME_VESICLE_BIOGENESIS	0.113597	0.323243	0.444346	1.34461	65	20
CHESLER_BRAIN_HIGHEST_GENETIC_VARIANCE	0.12069	0.335179	0.435303	1.34441	69	22
GGAANCGGAANY_UNKNOWN	0.066358	0.235234	0.329605	1.34431	42	86
GSE5679_PPARG_LIGAND_ROSIGLITAZONE_VS_ROSIGLITAZONE_AND_RARA_AGONIST_AM580_TREATED_DC_UP	0.0397059	0.168485	0.303887	1.34423	26	150
CAFFAREL_RESPONSE_TO_THC_DN	0.118136	0.331531	0.415165	1.34414	70	26
GSE14308_TH17_VS_NATURAL_TREG_UP	0.0483871	0.193072	0.306384	1.34354	32	140
GSE21546_WT_VS_SAP1A_KO_DP_THYMOCYTES_UP	0.0394537	0.16798	0.312227	1.34334	25	125
GO_PROTEIN_MATURATION	0.0383523	0.1642	0.297446	1.34278	26	168
SHEPARD_BMYB_MORPHOLINO_UP	0.0395894	0.168213	0.303772	1.34239	26	147
MORF_EI24	0.0475483	0.190635	0.308652	1.34236	31	136
GSE2770_TGFB_AND_IL4_ACT_VS_ACT_CD4_TCELL_2H_UP	0.0447094	0.183698	0.309287	1.3422	29	131
EHLERS_ANEUPLOIDY_UP	0.0865225	0.2773	0.386354	1.34191	51	35
GSE4590_SMALL_VS_VPREB_POS_LARGE_PRE_BCELL_DN	0.0725552	0.249339	0.339419	1.34183	45	72
GO_ANCHORING_JUNCTION	0.0151899	0.0884926	0.274056	1.34181	11	337
MODULE_299	0.109797	0.316947	0.406923	1.34148	64	29
GO_HETEROTRIMERIC_G_PROTEIN_COMPLEX	0.123214	0.338605	0.467917	1.34126	68	17
MORF_ACP1	0.0323034	0.146759	0.290352	1.34119	22	207
LINDGREN_BLADDER_CANCER_CLUSTER_2B	0.0295359	0.13832	0.289988	1.34108	20	213
GSE45365_NK_CELL_VS_CD8A_DC_MCMV_INFECTION_UP	0.0683625	0.239594	0.336595	1.34107	42	75
NUTT_GBM_VS_AO_GLIOMA_DN	0.0978441	0.297341	0.379944	1.34105	58	37
GSE15930_NAIVE_VS_72H_IN_VITRO_STIM_CD8_TCELL_DN	0.0337553	0.151079	0.29481	1.34072	23	176
HENDRICKS_SMARCA4_TARGETS_DN	0.109817	0.316947	0.397196	1.34054	65	31
GSE3982_EOSINOPHIL_VS_TH1_DN	0.0391872	0.16724	0.299528	1.34044	26	159
GSE14699_DELETIONAL_TOLERANCE_VS_ACTIVATED_CD8_TCELL_UP	0.0394161	0.16798	0.302052	1.34044	26	152
GO_ATPASE_REGULATOR_ACTIVITY	0.110553	0.318056	0.419968	1.34042	65	25
GO_RENAL_SYSTEM_PROCESS	0.0865225	0.2773	0.385918	1.34039	51	35
HOFFMANN_IMMATURE_TO_MATURE_B_LYMPHOCYTE_DN	0.104651	0.308918	0.378374	1.34035	62	38
GO_PROTEIN_TRANSMEMBRANE_TRANSPORT	0.0894309	0.282508	0.365397	1.33997	54	45
ZHANG_ANTIVIRAL_RESPONSE_TO_RIBAVIRIN_UP	0.123214	0.338605	0.467468	1.33997	68	17
GSE14350_IL2RB_KO_VS_WT_TREG_DN	0.0445765	0.183337	0.308658	1.33996	29	134
GSE24671_BAKIMULC_VS_SENDAI_VIRUS_INFECTED_MOUSE_SPLENOCYTES_UP	0.0394737	0.16798	0.301515	1.33989	26	153
GSE11961_GERMINAL_CENTER_BCELL_DAY7_VS_MEMORY_BCELL_DAY40_DN	0.0573643	0.215204	0.31768	1.33968	36	106
GSE17974_IL4_AND_ANTI_IL12_VS_UNTREATED_0.5H_ACT_CD4_TCELL_UP	0.0523077	0.201793	0.316969	1.3394	33	108
GO_NUCLEAR_ENVELOPE_REASSEMBLY	0.123214	0.338605	0.467227	1.33928	68	17
GO_COENZYME_METABOLIC_PROCESS	0.031768	0.145174	0.292576	1.33923	22	181
KUMAR_TARGETS_OF_MLL_AF9_FUSION	0.0227273	0.117411	0.280707	1.33894	16	269
GSE37532_WT_VS_PPARG_KO_VISCERAL_ADIPOSE_TISSUE_TREG_DN	0.0407569	0.171261	0.300428	1.33884	27	154
GO_REGULATION_OF_LYMPHOCYTE_APOPTOTIC_PROCESS	0.0881864	0.280431	0.385462	1.33881	52	35
GSE40273_EOS_KO_VS_WT_TREG_UP	0.0383523	0.1642	0.296513	1.33857	26	168
GSE10463_CD40L_AND_VA347_VS_CD40L_IN_DC_DN	0.0882825	0.280603	0.353723	1.3385	54	57
GSE2770_UNTREATED_VS_IL4_TREATED_ACT_CD4_TCELL_48H_UP	0.044733	0.183698	0.299153	1.33846	30	158
KIM_RESPONSE_TO_TSA_AND_DECITABINE_UP	0.0870968	0.278458	0.35384	1.33813	53	56
GSE22886_DAY0_VS_DAY1_MONOCYTE_IN_CULTURE_UP	0.0399429	0.169116	0.296611	1.33808	27	163
GSE15330_MEGAKARYOCYTE_ERYTHROID_VS_GRANULOCYTE_MONOCYTE_PROGENITOR_IKAROS_KO_UP	0.0369318	0.160326	0.29577	1.33773	25	171
GSE36888_STAT5_AB_KNOCKIN_VS_WT_TCELL_IL2_TREATED_17H_UP	0.0399429	0.169116	0.296456	1.33738	27	163
HOELZEL_NF1_TARGETS_DN	0.107438	0.313546	0.391196	1.33729	64	32
GSE34006_A2AR_KO_VS_A2AR_AGONIST_TREATED_TREG_UP	0.044733	0.183698	0.298707	1.33646	30	158
REACTOME_THROMBIN_SIGNALLING_THROUGH_PROTEINASE_ACTIVATED_RECEPTORS_PARS	0.122203	0.337351	0.441635	1.33641	70	20
GSE5542_IFNG_VS_IFNA_AND_IFNG_TREATED_EPITHELIAL_CELLS_24H_DN	0.06	0.220831	0.315821	1.33624	38	110
GO_RESPONSE_TO_BIOTIC_STIMULUS	0.00728155	0.0529148	0.264299	1.33613	5	496
GSE42724_NAIVE_BCELL_VS_PLASMABLAST_UP	0.0485294	0.193389	0.30509	1.33612	32	139
GSE43955_TH0_VS_TGFB_IL6_TH17_ACT_CD4_TCELL_10H_UP	0.0535714	0.204954	0.305118	1.3361	35	141
GSE46606_UNSTIM_VS_CD40L_IL2_IL5_1DAY_STIMULATED_IRF4MID_SORTED_BCELL_DN	0.0771654	0.259123	0.339819	1.33603	48	69
GO_REGULATION_OF_MULTICELLULAR_ORGANISMAL_METABOLIC_PROCESS	0.118375	0.33168	0.449779	1.33593	66	19
GSE9650_EXHAUSTED_VS_MEMORY_CD8_TCELL_DN	0.0379747	0.163158	0.293743	1.33587	26	176
GSE19825_NAIVE_VS_DAY3_EFF_CD8_TCELL_DN	0.0383523	0.1642	0.295789	1.3353	26	168
KYNG_RESPONSE_TO_H2O2_VIA_ERCC6_DN	0.105085	0.30972	0.391589	1.33509	61	33
GO_EXTRACELLULAR_STRUCTURE_ORGANIZATION	0.0579268	0.21638	0.314351	1.33458	37	113
MA_PITUITARY_FETAL_VS_ADULT_DN	0.11943	0.33355	0.481997	1.33444	66	15
GSE19772_HCMV_INFL_VS_HCMV_INF_MONOCYTES_AND_PI3K_INHIBITION_DN	0.037196	0.161258	0.295863	1.33428	25	169
GO_SIGNALING_RECEPTOR_ACTIVITY	0.0171731	0.09663	0.277819	1.33428	12	290
ZWANG_CLASS_2_TRANSIENTLY_INDUCED_BY_EGF	0.118375	0.33168	0.449173	1.33413	66	19
GO_PTERIDINE_CONTAINING_COMPOUND_METABOLIC_PROCESS	0.120748	0.335252	0.422978	1.33403	70	24
GSE12392_WT_VS_IFNAR_KO_CD8A_NEG_SPLEEN_DC_DN	0.0467572	0.188814	0.309545	1.33402	30	126
GO_OXIDOREDUCTASE_ACTIVITY_ACTING_ON_A_SULFUR_GROUP_OF_DONORS	0.109836	0.316947	0.373223	1.33324	66	39
GSE2770_IL12_ACT_VS_ACT_CD4_TCELL_6H_UP	0.047619	0.19069	0.29797	1.33316	32	158
BURTON_ADIPOGENESIS_PEAK_AT_8HR	0.113145	0.32253	0.394965	1.33301	67	31
GSE28783_CTRL_ANTI_MIR_VS_UNTREATED_ATHEROSCLEROSIS_MACROPHAGE_UP	0.0458015	0.18603	0.312367	1.3329	29	119
GSE24574_BCL6_LOW_TFH_VS_NAIVE_CD4_TCELL_UP	0.0475483	0.190635	0.307004	1.33278	31	134
[truncated: 11,377 more rows]

## Sheet: 20954 Combo vs V
Supplementary Table 4b: GSEA comparing bone marrow macrophages from DFBL-20954 bearing mice treated with Alemtuzumab + Cyclophosphamide (Combo) or PBS (V). Positive enrichment scores indicate gene sets expressed higher in Combo as compared to PBS determined by the ordering of the rank ordered differential expression lists.
pathway	pval	padj	ES	NES	nMoreExtreme	size
KARLSSON_TGFB1_TARGETS_UP	0.0021645	0.0395954	0.643885	2.74062	0	102
GNF2_PCAF	0.00202429	0.0395954	0.818817	2.5772	0	25
GNF2_SPTA1	0.00207039	0.0395954	0.646681	2.49442	0	62
HALLMARK_HEME_METABOLISM	0.00234742	0.0395954	0.547951	2.48461	0	162
GSE24102_GRANULOCYSTIC_MDSC_VS_NEUTROPHIL_DN	0.00229358	0.0395954	0.550941	2.44729	0	138
GNF2_SPTB	0.00205761	0.0395954	0.641593	2.44568	0	57
GNF2_ANK1	0.00205761	0.0395954	0.641593	2.44568	0	57
GNF2_MAP2K3	0.00206186	0.0395954	0.632994	2.44227	0	61
GNF2_NS	0.00204082	0.0395954	0.687705	2.43987	0	40
GNF2_TAL1	0.00204499	0.0395954	0.63886	2.43768	0	58
GNF2_BNIP3L	0.0020202	0.0395954	0.639091	2.42744	0	55
GSE3039_CD4_TCELL_VS_ALPHABETA_CD8_TCELL_DN	0.00229358	0.0395954	0.537042	2.40262	0	145
GNF2_CDC27	0.00202429	0.0395954	0.644808	2.39869	0	51
GNF2_RAD23A	0.0020202	0.0395954	0.626477	2.37953	0	55
NADLER_OBESITY_UP	0.00201207	0.0395954	0.637405	2.36003	0	50
TAKEDA_TARGETS_OF_NUP98_HOXA9_FUSION_8D_UP	0.00211864	0.0395954	0.580832	2.35893	0	78
BROWN_MYELOID_CELL_DEVELOPMENT_DN	0.00217391	0.0395954	0.560523	2.34424	0	94
WANG_TARGETS_OF_MLL_CBP_FUSION_DN	0.00206612	0.0395954	0.650811	2.32594	0	43
GO_RESPONSE_TO_IRON_ION	0.00202429	0.0395954	0.753168	2.30632	0	22
GSE34205_RSV_VS_FLU_INF_INFANT_PBMC_UP	0.00210084	0.0395954	0.563499	2.30585	0	79
LIAN_LIPA_TARGETS_3M	0.00201207	0.0395954	0.62189	2.30259	0	50
LIAN_LIPA_TARGETS_6M	0.00205339	0.0395954	0.605917	2.29981	0	56
GSE3039_NKT_CELL_VS_ALPHABETA_CD8_TCELL_DN	0.00231481	0.0395954	0.507297	2.29842	0	161
GO_IMPORT_INTO_CELL	0.00204082	0.0395954	0.787332	2.29796	0	19
GNF2_PRDX2	0.00202429	0.0395954	0.72694	2.28802	0	25
GSE22140_GERMFREE_VS_SPF_ARTHRITIC_MOUSE_CD4_TCELL_UP	0.00229885	0.0395954	0.511282	2.28782	0	144
SCHUHMACHER_MYC_TARGETS_UP	0.00217865	0.0395954	0.576702	2.2827	0	71
YAO_TEMPORAL_RESPONSE_TO_PROGESTERONE_CLUSTER_11	0.00208768	0.0395954	0.546675	2.27889	0	86
HALLMARK_MYC_TARGETS_V1	0.00230947	0.0395954	0.488419	2.27095	0	197
TONKS_TARGETS_OF_RUNX1_RUNX1T1_FUSION_MONOCYTE_UP	0.00239234	0.0395954	0.504049	2.26455	0	157
GO_RESPONSE_TO_TYPE_I_INTERFERON	0.00203252	0.0395954	0.630983	2.2441	0	41
GO_POSITIVE_REGULATION_OF_TELOMERASE_RNA_LOCALIZATION_TO_CAJAL_BODY	0.00199203	0.0395954	0.822048	2.23806	0	15
GO_REGULATION_OF_TELOMERASE_RNA_LOCALIZATION_TO_CAJAL_BODY	0.00199203	0.0395954	0.822048	2.23806	0	15
PAPASPYRIDONOS_UNSTABLE_ATEROSCLEROTIC_PLAQUE_UP	0.00202429	0.0395954	0.613802	2.21815	0	45
GSE6674_ANTI_IGM_VS_ANTI_IGM_AND_CPG_STIM_BCELL_DN	0.00238095	0.0395954	0.486691	2.21631	0	169
MULLIGAN_NTF3_SIGNALING_VIA_INSR_AND_IGF1R_UP	0.002	0.0395954	0.735594	2.21602	0	21
GSE369_IFNG_KO_VS_WT_LIVER_DN	0.00236967	0.0395954	0.486879	2.21599	0	168
MORF_UNG	0.00215054	0.0395954	0.556764	2.21561	0	72
BERTUCCI_INVASIVE_CARCINOMA_DUCTAL_VS_LOBULAR_DN	0.00204082	0.0395954	0.71757	2.21332	0	23
MORF_GSPT1	0.00204082	0.0395954	0.602663	2.19563	0	47
GSE21670_UNTREATED_VS_IL6_TREATED_STAT3_KO_CD4_TCELL_DN	0.00239808	0.0395954	0.482346	2.19529	0	170
SCHLOSSER_MYC_TARGETS_AND_SERUM_RESPONSE_DN	0.00206186	0.0395954	0.606557	2.19439	0	46
GROSS_HYPOXIA_VIA_HIF1A_UP	0.00220751	0.0395954	0.557832	2.18437	0	69
GSE43863_TH1_VS_TFH_MEMORY_CD4_TCELL_UP	0.00238095	0.0395954	0.477668	2.17522	0	169
GSE34156_TLR1_TLR2_LIGAND_VS_NOD2_AND_TLR1_TLR2_LIGAND_24H_TREATED_MONOCYTE_UP	0.00228311	0.0395954	0.48265	2.1597	0	146
GSE21670_STAT3_KO_VS_WT_CD4_TCELL_DN	0.00232019	0.0395954	0.476297	2.14344	0	152
GO_NEGATIVE_REGULATION_OF_NEURON_APOPTOTIC_PROCESS	0.00209644	0.0395954	0.530458	2.12897	0	75
APPIERTO_RESPONSE_TO_FENRETINIDE_UP	0.00202429	0.0395954	0.695193	2.12879	0	22
MODULE_488	0.00204082	0.0395954	0.727916	2.12454	0	19
ONGUSAHA_TP53_TARGETS	0.00210526	0.0395954	0.667662	2.12139	0	28
GNF2_RAN	0.00211416	0.0395954	0.511936	2.11979	0	84
GSE3039_ALPHAALPHA_CD8_TCELL_VS_B1_BCELL_UP	0.00239234	0.0395954	0.470968	2.11592	0	157
REACTOME_INTERFERON_ALPHA_BETA_SIGNALING	0.00206612	0.0395954	0.59975	2.10795	0	39
VALK_AML_CLUSTER_7	0.00203252	0.0395954	0.750141	2.10781	0	17
REACTOME_CHEMOKINE_RECEPTORS_BIND_CHEMOKINES	0.00202429	0.0395954	0.668752	2.10488	0	25
GSE21774_CD56_BRIGHT_VS_DIM_CD62L_POSITIVE_NK_CELL_DN	0.00221729	0.0395954	0.472937	2.10162	0	132
GO_DEFENSE_RESPONSE_TO_VIRUS	0.00217391	0.0395954	0.496489	2.09867	0	98
GSE3039_CD4_TCELL_VS_B2_BCELL_DN	0.00235849	0.0395954	0.468065	2.09626	0	150
KEGG_PORPHYRIN_AND_CHLOROPHYLL_METABOLISM	0.002079	0.0395954	0.66642	2.09497	0	26
MENSSEN_MYC_TARGETS	0.00201207	0.0395954	0.568176	2.0941	0	49
PILON_KLF1_TARGETS_UP	0.00234192	0.0395954	0.430814	2.09235	0	285
MODULE_355	0.00204082	0.0395954	0.677981	2.09121	0	23
GSE3039_B2_VS_B1_BCELL_UP	0.00232558	0.0395954	0.471209	2.09005	0	140
DIRMEIER_LMP1_RESPONSE_LATE_UP	0.00201207	0.0395954	0.563209	2.08532	0	50
HALLMARK_MYC_TARGETS_V2	0.00205339	0.0395954	0.549344	2.08508	0	56
GO_REGULATION_OF_MACROPHAGE_DERIVED_FOAM_CELL_DIFFERENTIATION	0.00203252	0.0395954	0.740201	2.07988	0	17
REACTOME_CYTOSOLIC_TRNA_AMINOACYLATION	0.00199601	0.0395954	0.666186	2.07934	0	24
GO_NEGATIVE_REGULATION_OF_NEURON_DEATH	0.00217865	0.0395954	0.489678	2.06789	0	99
HESS_TARGETS_OF_HOXA9_AND_MEIS1_DN	0.00217391	0.0395954	0.526457	2.06541	0	68
LEE_AGING_CEREBELLUM_UP	0.00206186	0.0395954	0.535004	2.0642	0	61
GO_INTRINSIC_APOPTOTIC_SIGNALING_PATHWAY_IN_RESPONSE_TO_DNA_DAMAGE	0.00205339	0.0395954	0.543389	2.06248	0	56
MODULE_299	0.00209644	0.0395954	0.641892	2.06114	0	29
YAO_TEMPORAL_RESPONSE_TO_PROGESTERONE_CLUSTER_14	0.00226244	0.0395954	0.47049	2.05183	0	122
PENG_GLUTAMINE_DEPRIVATION_DN	0.00231481	0.0395954	0.418263	2.04904	0	302
VERHAAK_AML_WITH_NPM1_MUTATED_UP	0.00221729	0.0395954	0.465626	2.04857	0	126
MORF_FEN1	0.00210084	0.0395954	0.529348	2.04803	0	63
GO_INTRINSIC_APOPTOTIC_SIGNALING_PATHWAY_BY_P53_CLASS_MEDIATOR	0.00207469	0.0395954	0.584839	2.04692	0	38
GSE3982_EOSINOPHIL_VS_DC_DN	0.00239234	0.0395954	0.454529	2.04207	0	157
GSE46606_UNSTIM_VS_CD40L_IL2_IL5_1DAY_STIMULATED_IRF4_KO_BCELL_UP	0.002331	0.0395954	0.453837	2.04039	0	155
UROSEVIC_RESPONSE_TO_IMIQUIMOD	0.00199203	0.0395954	0.748443	2.03767	0	15
GSE6674_UNSTIM_VS_ANTI_IGM_AND_CPG_STIM_BCELL_DN	0.00236967	0.0395954	0.447615	2.03728	0	168
PID_MYC_ACTIV_PATHWAY	0.00217865	0.0395954	0.514639	2.03705	0	71
GSE19198_1H_VS_6H_IL21_TREATED_TCELL_DN	0.00234742	0.0395954	0.447473	2.02901	0	162
MODULE_245	0.00202429	0.0395954	0.643856	2.02652	0	25
GSE43863_NAIVE_VS_MEMORY_TFH_CD4_TCELL_D150_LCMV_DN	0.00236967	0.0395954	0.45099	2.02635	0	156
PENG_RAPAMYCIN_RESPONSE_DN	0.00225225	0.0395954	0.430039	2.0241	0	220
GSE43863_TH1_VS_LY6C_INT_CXCR5POS_MEMORY_CD4_TCELL_DN	0.00214592	0.0395954	0.48181	2.01955	0	91
GO_RRNA_MODIFICATION	0.00204082	0.0395954	0.654257	2.01804	0	23
GSE24634_TREG_VS_TCONV_POST_DAY10_IL4_CONVERSION_DN	0.00239234	0.0395954	0.44891	2.01682	0	157
GSE2405_0H_VS_1.5H_A_PHAGOCYTOPHILUM_STIM_NEUTROPHIL_UP	0.00218818	0.0395954	0.472004	2.01641	0	106
GSE27786_NKCELL_VS_MONO_MAC_UP	0.0023753	0.0395954	0.444858	2.0149	0	163
GO_HYDROLASE_ACTIVITY_ACTING_ON_CARBON_NITROGEN_BUT_NOT_PEPTIDE_BONDS_IN_CYCLIC_AMIDINES	0.00199203	0.0395954	0.739318	2.01282	0	15
GSE10240_IL22_VS_IL22_AND_IL17_STIM_PRIMARY_BRONCHIAL_EPITHELIAL_CELLS_DN	0.00222717	0.0395954	0.457006	2.0045	0	124
GSE8868_SPLEEN_VS_INTESTINE_CD11B_POS_CD11C_NEG_DC_DN	0.00221729	0.0395954	0.455302	2.00315	0	126
GSE22140_GERMFREE_VS_SPF_MOUSE_CD4_TCELL_DN	0.00234742	0.0395954	0.439245	1.99803	0	166
MODULE_155	0.00199601	0.0395954	0.639739	1.99679	0	24
MOSERLE_IFNA_RESPONSE	0.00203666	0.0395954	0.671881	1.98836	0	20
MORF_RAD54L	0.00217391	0.0395954	0.470181	1.98747	0	98
VECCHI_GASTRIC_CANCER_ADVANCED_VS_EARLY_UP	0.00212314	0.0395954	0.509664	1.98536	0	65
MORF_FBL	0.00226757	0.0395954	0.446979	1.98247	0	135
GO_PIGMENT_METABOLIC_PROCESS	0.00204082	0.0395954	0.558654	1.98202	0	40
GO_RESPONSE_TO_INTERLEUKIN_4	0.00204082	0.0395954	0.678733	1.98099	0	19
GSE17721_ALL_VS_24H_PAM3CSK4_BMDC_UP	0.00236967	0.0395954	0.440652	1.97989	0	156
PENG_LEUCINE_DEPRIVATION_DN	0.0023753	0.0395954	0.433034	1.97912	0	172
REACTOME_TRNA_AMINOACYLATION	0.00204082	0.0395954	0.557529	1.97803	0	40
GNF2_PA2G4	0.00211864	0.0395954	0.489091	1.9743	0	77
GO_REGULATION_OF_NEURON_DEATH	0.00235849	0.0395954	0.440745	1.9739	0	150
GSE360_DC_VS_MAC_M_TUBERCULOSIS_UP	0.00224215	0.0395954	0.448716	1.97332	0	128
VALK_AML_CLUSTER_8	0.00200401	0.0395954	0.687398	1.97166	0	18
GSE10240_CTRL_VS_IL22_STIM_PRIMARY_BRONCHIAL_EPITHELIAL_CELLS_UP	0.00229885	0.0395954	0.439658	1.96733	0	144
IRITANI_MAD1_TARGETS_DN	0.00206186	0.0395954	0.542953	1.96429	0	46
RAMALHO_STEMNESS_UP	0.002331	0.0395954	0.42795	1.96419	0	176
GSE14415_TCONV_VS_FOXP3_KO_INDUCED_TREG_UP	0.00234192	0.0395954	0.43817	1.96374	0	149
GO_RESPONSE_TO_ARSENIC_CONTAINING_SUBSTANCE	0.00204082	0.0395954	0.636355	1.96282	0	23
HECKER_IFNB1_TARGETS	0.00209205	0.0395954	0.500254	1.96187	0	66
SHEPARD_CRUSH_AND_BURN_MUTANT_UP	0.00232558	0.0395954	0.441807	1.95964	0	140
JUBAN_TARGETS_OF_SPI1_AND_FLI1_DN	0.0021645	0.0395954	0.490777	1.9566	0	73
GSE38681_WT_VS_LYL1_KO_LYMPHOID_PRIMED_MULTIPOTENT_PROGENITOR_DN	0.00236967	0.0395954	0.434965	1.95434	0	156
GSE19374_UNINF_VS_LISTERIA_INFECTED_MACROPHAGE_UP	0.00208768	0.0395954	0.468726	1.95395	0	86
GSE34156_NOD2_LIGAND_VS_TLR1_TLR2_LIGAND_6H_TREATED_MONOCYTE_DN	0.00226757	0.0395954	0.4405	1.95373	0	135
GSE4748_CYANOBACTERIUM_LPSLIKE_VS_LPS_AND_CYANOBACTERIUM_LPSLIKE_STIM_DC_3H_UP	0.00217391	0.0395954	0.457654	1.95145	0	105
GSE22432_MULTIPOTENT_VS_COMMON_DC_PROGENITOR_UNTREATED_UP	0.00236407	0.0395954	0.423372	1.94538	0	181
GO_RESPONSE_TO_VIRUS	0.0023753	0.0395954	0.431638	1.94421	0	158
SEIDEN_MET_SIGNALING	0.00204082	0.0395954	0.665981	1.94377	0	19
GSE19888_ADENOSINE_A3R_INH_PRETREAT_AND_ACT_BY_A3R_VS_TCELL_MEMBRANES_ACT_MAST_CELL_UP	0.00232558	0.0395954	0.432055	1.94241	0	153
HALLMARK_INTERFERON_ALPHA_RESPONSE	0.0021097	0.0395954	0.474086	1.9423	0	81
GO_RESPONSE_TO_ATP	0.00203666	0.0395954	0.653853	1.935	0	20
ADDYA_ERYTHROID_DIFFERENTIATION_BY_HEMIN	0.00205761	0.0395954	0.507594	1.93489	0	57
YORDY_RECIPROCAL_REGULATION_BY_ETS1_AND_SP100_DN	0.00413223	0.0613588	0.541217	1.93426	1	43
GSE17721_PAM3CSK4_VS_GADIQUIMOD_16H_BMDC_DN	0.00236967	0.0395954	0.430406	1.93386	0	156
GO_POSITIVE_REGULATION_OF_PROTEIN_LOCALIZATION_TO_NUCLEUS	0.00214592	0.0395954	0.461197	1.93315	0	91
TAKEDA_TARGETS_OF_NUP98_HOXA9_FUSION_10D_UP	0.00214592	0.0395954	0.460059	1.92838	0	91
MORF_PCNA	0.0021097	0.0395954	0.469945	1.92533	0	81
LINDVALL_IMMORTALIZED_BY_TERT_DN	0.00420168	0.0613588	0.5555	1.92499	1	37
MORF_DEAF1	0.00201207	0.0395954	0.508997	1.92467	0	53
BURTON_ADIPOGENESIS_2	0.00201207	0.0395954	0.508845	1.92409	0	53
GO_CHEMOKINE_MEDIATED_SIGNALING_PATHWAY	0.00215517	0.0395954	0.598276	1.92398	0	30
KEGG_P53_SIGNALING_PATHWAY	0.00201207	0.0395954	0.5121	1.92355	0	52
GSE23502_WT_VS_HDC_KO_MYELOID_DERIVED_SUPPRESSOR_CELL_BM_DN	0.00235294	0.0395954	0.425747	1.92291	0	160
GO_RNA_HELICASE_ACTIVITY	0.00203252	0.0395954	0.498788	1.92282	0	60
GO_RESPONSE_TO_DEXAMETHASONE	0.00202429	0.0395954	0.627188	1.92055	0	22
ALTEMEIER_RESPONSE_TO_LPS_WITH_MECHANICAL_VENTILATION	0.00217391	0.0395954	0.459142	1.92024	0	94
SANSOM_WNT_PATHWAY_REQUIRE_MYC	0.00214133	0.0395954	0.61112	1.91984	0	27
REACTOME_ASSOCIATION_OF_TRIC_CCT_WITH_TARGET_PROTEINS_DURING_BIOSYNTHESIS	0.002079	0.0395954	0.61055	1.91934	0	26
V$MYCMAX_01	0.00236967	0.0395954	0.426968	1.91841	0	156
HUMMEL_BURKITTS_LYMPHOMA_UP	0.002	0.0395954	0.636648	1.91794	0	21
chr6q14	0.00406504	0.0613588	0.68083	1.91305	1	17
GSE43863_TH1_VS_LY6C_INT_CXCR5POS_MEMORY_CD4_TCELL_UP	0.002331	0.0395954	0.42061	1.91216	0	165
HUANG_FOXA2_TARGETS_DN	0.00203666	0.0395954	0.645844	1.9113	0	20
GO_PORPHYRIN_CONTAINING_COMPOUND_METABOLIC_PROCESS	0.00210526	0.0395954	0.601425	1.91094	0	28
GSE42021_TREG_PLN_VS_CD24LO_TREG_THYMUS_DN	0.00220264	0.0395954	0.446642	1.9101	0	108
GSE26030_TH1_VS_TH17_DAY5_POST_POLARIZATION_UP	0.00226244	0.0395954	0.427672	1.90955	0	141
GSE21360_NAIVE_VS_SECONDARY_MEMORY_CD8_TCELL_DN	0.00230947	0.0395954	0.424369	1.90898	0	151
GO_AMINO_ACID_ACTIVATION	0.00201207	0.0395954	0.517845	1.90859	0	49
GO_TRNA_AMINOACYLATION	0.00201207	0.0395954	0.517845	1.90859	0	49
GO_SNORNA_BINDING	0.002079	0.0395954	0.606616	1.90697	0	26
DAIRKEE_CANCER_PRONE_RESPONSE_BPA	0.00413223	0.0613588	0.533475	1.90659	1	43
GSE40274_XBP1_VS_FOXP3_AND_XBP1_TRANSDUCED_ACTIVATED_CD4_TCELL_DN	0.00235849	0.0395954	0.425497	1.90561	0	150
GSE37532_TREG_VS_TCONV_PPARG_KO_CD4_TCELL_FROM_LN_DN	0.00236967	0.0395954	0.418571	1.9051	0	168
MODULE_223	0.00210084	0.0395954	0.471755	1.90352	0	76
GSE5542_IFNG_VS_IFNA_AND_IFNG_TREATED_EPITHELIAL_CELLS_24H_DN	0.00220751	0.0395954	0.442138	1.89992	0	110
GSE29618_MONOCYTE_VS_MDC_DN	0.00231481	0.0395954	0.425175	1.89902	0	143
GSE10325_LUPUS_CD4_TCELL_VS_LUPUS_BCELL_DN	0.00225225	0.0395954	0.441553	1.89894	0	114
GO_PROTEIN_TYROSINE_SERINE_THREONINE_PHOSPHATASE_ACTIVITY	0.00209644	0.0395954	0.590829	1.89717	0	29
GSE3039_NKT_CELL_VS_B2_BCELL_DN	0.00226757	0.0395954	0.427546	1.89628	0	135
GSE22919_RESTING_VS_IL2_IL12_IL15_STIM_NK_CELL_UP	0.00239234	0.0395954	0.415096	1.89566	0	174
GNF2_NPM1	0.00211864	0.0395954	0.480417	1.89547	0	67
COLLER_MYC_TARGETS_UP	0.00204082	0.0395954	0.612676	1.88978	0	23
MODULE_160	0.00199203	0.0395954	0.693651	1.88849	0	15
BROWNE_HCMV_INFECTION_24HR_DN	0.00211416	0.0395954	0.453809	1.88727	0	87
GSE7400_CTRL_VS_CSF3_IN_VIVO_TREATED_PBMC_UP	0.00234192	0.0395954	0.420739	1.88562	0	149
GSE21546_SAP1A_KO_VS_SAP1A_KO_AND_ELK1_KO_ANTI_CD3_STIM_DP_THYMOCYTES_UP	0.00226757	0.0395954	0.425085	1.88536	0	135
MORI_SMALL_PRE_BII_LYMPHOCYTE_DN	0.00215054	0.0395954	0.473539	1.88442	0	72
GSE32986_CURDLAN_LOWDOSE_VS_GMCSF_AND_CURDLAN_LOWDOSE_STIM_DC_DN	0.00234742	0.0395954	0.414216	1.88418	0	166
STK33_NOMO_UP	0.00230947	0.0395954	0.405216	1.88409	0	197
MORF_MSH2	0.00204082	0.0395954	0.493499	1.88397	0	59
ROSS_AML_OF_FAB_M7_TYPE	0.00201207	0.0395954	0.497808	1.88236	0	53
FULCHER_INFLAMMATORY_RESPONSE_LECTIN_VS_LPS_DN	0.00228833	0.0395954	0.378345	1.88131	0	334
BOSCO_INTERFERON_INDUCED_ANTIVIRAL_MODULE	0.00204499	0.0395954	0.492922	1.88082	0	58
GSE13522_WT_VS_IFNAR_KO_SKIN_DN	0.00228311	0.0395954	0.423288	1.88031	0	137
GSE26030_TH1_VS_TH17_DAY5_POST_POLARIZATION_DN	0.0023753	0.0395954	0.413617	1.87986	0	167
WORSCHECH_TUMOR_EVASION_AND_TOLEROGENICITY_UP	0.00406504	0.0613588	0.668388	1.87809	1	17
GSE14415_FOXP3_KO_NATURAL_TREG_VS_TCONV_UP	0.00222717	0.0395954	0.430704	1.87781	0	121
SCHUETZ_BREAST_CANCER_DUCTAL_INVASIVE_UP	0.00235849	0.0395954	0.410664	1.87741	0	171
GSE9601_NFKB_INHIBITOR_VS_PI3K_INHIBITOR_TREATED_HCMV_INF_MONOCYTE_DN	0.00221729	0.0395954	0.431771	1.87703	0	120
GSE37532_TREG_VS_TCONV_CD4_TCELL_FROM_LN_UP	0.00236967	0.0395954	0.417252	1.87476	0	156
GO_REGULATION_OF_NEURON_APOPTOTIC_PROCESS	0.00224719	0.0395954	0.435299	1.87406	0	113
GSE36527_CD69_NEG_VS_POS_TREG_CD62L_LOS_KLRG1_NEG_UP	0.00234192	0.0395954	0.418154	1.87403	0	149
GSE9960_GRAM_POS_VS_GRAM_NEG_AND_POS_SEPSIS_PBMC_UP	0.00236967	0.0395954	0.407525	1.87402	0	182
GSE6259_CD4_TCELL_VS_CD8_TCELL_DN	0.00234192	0.0395954	0.417919	1.87298	0	149
KERLEY_RESPONSE_TO_CISPLATIN_UP	0.00209644	0.0395954	0.582793	1.87137	0	29
GSE19888_CTRL_VS_TCELL_MEMBRANES_ACT_MAST_CELL_PRETREAT_A3R_INH_DN	0.00228311	0.0395954	0.418196	1.87129	0	146
MARKEY_RB1_CHRONIC_LOF_DN	0.0021097	0.0395954	0.456124	1.86871	0	81
GSE9650_EFFECTOR_VS_MEMORY_CD8_TCELL_DN	0.00235849	0.0395954	0.408643	1.86817	0	171
GSE5542_IFNA_VS_IFNA_AND_IFNG_TREATED_EPITHELIAL_CELLS_24H_UP	0.00218818	0.0395954	0.423358	1.86711	0	127
GSE8921_UNSTIM_VS_TLR1_2_STIM_MONOCYTE_24H_UP	0.00226244	0.0395954	0.418105	1.86684	0	141
GSE411_100MIN_VS_400MIN_IL6_STIM_MACROPHAGE_DN	0.00239808	0.0395954	0.410106	1.8665	0	170
MODULE_27	0.0021978	0.0395954	0.419296	1.86549	0	131
GO_B_CELL_MEDIATED_IMMUNITY	0.00420168	0.0613588	0.537504	1.86262	1	37
GO_MYELIN_SHEATH	0.00223214	0.0395954	0.432355	1.86172	0	115
CHIARADONNA_NEOPLASTIC_TRANSFORMATION_KRAS_CDC25_DN	0.002079	0.0395954	0.591491	1.85942	0	26
GSE37301_MULTIPOTENT_PROGENITOR_VS_GRAN_MONO_PROGENITOR_UP	0.00219298	0.0395954	0.418468	1.85936	0	130
GSE6259_FLT3L_INDUCED_33D1_POS_DC_VS_CD4_TCELL_UP	0.00221729	0.0395954	0.422299	1.85795	0	126
HALLMARK_INTERFERON_GAMMA_RESPONSE	0.0023753	0.0395954	0.408778	1.85787	0	167
GO_RESPONSE_TO_PURINE_CONTAINING_COMPOUND	0.00215517	0.0395954	0.441315	1.8568	0	95
GSE29618_MONOCYTE_VS_MDC_DAY7_FLU_VACCINE_DN	0.00235849	0.0395954	0.414561	1.85664	0	150
LEF1_UP.V1_UP	0.00209644	0.0395954	0.462529	1.85634	0	75
GO_CYTOKINE_RECEPTOR_ACTIVITY	0.00406504	0.0613588	0.521469	1.85462	1	41
GSE21360_PRIMARY_VS_QUATERNARY_MEMORY_CD8_TCELL_UP	0.00232019	0.0395954	0.412104	1.85455	0	152
LIM_MAMMARY_STEM_CELL_UP	0.00232558	0.0395954	0.401749	1.85304	0	179
GO_CELLULAR_RESPONSE_TO_TOXIC_SUBSTANCE	0.00400802	0.0613588	0.646032	1.85301	1	18
PID_P53_DOWNSTREAM_PATHWAY	0.00214592	0.0395954	0.440077	1.84858	0	93
GO_IRON_ION_HOMEOSTASIS	0.00625	0.0743056	0.521017	1.8485	2	42
GSE21774_CD56_BRIGHT_VS_DIM_CD62L_POSITIVE_NK_CELL_UP	0.00229885	0.0395954	0.41252	1.8459	0	144
GSE19941_IL10_KO_VS_IL10_KO_AND_NFKBP50_KO_LPS_AND_IL10_STIM_MACROPHAGE_UP	0.00219298	0.0395954	0.415305	1.84531	0	130
REACTOME_TRANSPORT_OF_INORGANIC_CATIONS_ANIONS_AND_AMINO_ACIDS_OLIGOPEPTIDES	0.00416667	0.0613588	0.535459	1.84469	1	36
GO_CELLULAR_RESPONSE_TO_DEXAMETHASONE_STIMULUS	0.00204082	0.0395954	0.631861	1.84419	0	19
GSE27241_CTRL_VS_DIGOXIN_TREATED_CD4_TCELL_IN_TH17_POLARIZING_CONDITIONS_DN	0.00221729	0.0395954	0.414791	1.84323	0	132
GSE25088_IL4_VS_IL4_AND_ROSIGLITAZONE_STIM_MACROPHAGE_DAY10_UP	0.00232558	0.0395954	0.415318	1.84215	0	140
GSE34156_NOD2_LIGAND_VS_TLR1_TLR2_LIGAND_6H_TREATED_MONOCYTE_UP	0.00232558	0.0395954	0.409574	1.84134	0	153
SENESE_HDAC3_TARGETS_UP	0.00231481	0.0395954	0.371896	1.84012	0	330
GO_INTRINSIC_APOPTOTIC_SIGNALING_PATHWAY_IN_RESPONSE_TO_DNA_DAMAGE_BY_P53_CLASS_MEDIATOR	0.00404858	0.0613588	0.584358	1.83925	1	25
GSE18791_CTRL_VS_NEWCASTLE_VIRUS_DC_14H_DN	0.00214592	0.0395954	0.442261	1.83921	0	88
GSE45365_NK_CELL_VS_CD11B_DC_MCMV_INFECTION_UP	0.00220264	0.0395954	0.429955	1.83874	0	108
GSE30083_SP2_VS_SP3_THYMOCYTE_UP	0.00211416	0.0395954	0.442093	1.83855	0	87
GSE22501_PERIPHERAL_BLOOD_VS_CORD_BLOOD_TREG_UP	0.00215054	0.0395954	0.439328	1.83837	0	90
GO_CELLULAR_RESPONSE_TO_INTERLEUKIN_4	0.00406504	0.0613588	0.654149	1.83808	1	17
KRIGE_AMINO_ACID_DEPRIVATION	0.00404858	0.0613588	0.583	1.83497	1	25
BECKER_TAMOXIFEN_RESISTANCE_UP	0.00420168	0.0613588	0.529386	1.8345	1	37
VALK_AML_CLUSTER_5	0.00404858	0.0613588	0.599085	1.83449	1	22
WANG_IMMORTALIZED_BY_HOXA9_AND_MEIS1_DN	0.00203666	0.0395954	0.619032	1.83196	0	20
WARTERS_RESPONSE_TO_IR_SKIN	0.00408163	0.0613588	0.50279	1.83177	1	47
GO_CARBOHYDRATE_TRANSPORTER_ACTIVITY	0.00400802	0.0613588	0.638449	1.83126	1	18
GO_REGULATION_OF_TELOMERE_MAINTENANCE	0.00206186	0.0395954	0.474523	1.83085	0	61
IVANOVA_HEMATOPOIESIS_STEM_CELL_AND_PROGENITOR	0.00246305	0.0404709	0.366572	1.8308	0	385
GO_NEUTRAL_AMINO_ACID_TRANSMEMBRANE_TRANSPORTER_ACTIVITY	0.00199203	0.0395954	0.672202	1.8301	0	15
LEE_LIVER_CANCER_CIPROFIBRATE_UP	0.004158	0.0613588	0.53678	1.82949	1	35
GO_NUCLEOLAR_PART	0.00204082	0.0395954	0.479047	1.8288	0	59
GSE34006_WT_VS_A2AR_KO_TREG_DN	0.00226244	0.0395954	0.409578	1.82876	0	141
SANA_RESPONSE_TO_IFNG_DN	0.00211416	0.0395954	0.470775	1.8282	0	64
GO_REGULATION_OF_INTERFERON_ALPHA_PRODUCTION	0.00406504	0.0613588	0.650607	1.82813	1	17
GO_HEME_METABOLIC_PROCESS	0.00399202	0.0613588	0.58539	1.82715	1	24
GSE19941_LPS_VS_LPS_AND_IL10_STIM_IL10_KO_NFKBP50_KO_MACROPHAGE_UP	0.00222717	0.0395954	0.416434	1.82654	0	124
GRADE_COLON_AND_RECTAL_CANCER_UP	0.00231481	0.0395954	0.381159	1.82647	0	250
MYLLYKANGAS_AMPLIFICATION_HOT_SPOT_23	0.0040568	0.0613588	0.659265	1.82641	1	16
GO_IMMUNE_EFFECTOR_PROCESS	0.002331	0.0395954	0.376179	1.82637	0	284
GO_NUCLEOID	0.00420168	0.0613588	0.526642	1.82498	1	37
GO_RESPONSE_TO_INTERFERON_GAMMA	0.00211864	0.0395954	0.462488	1.82473	0	67
GO_CELL_FATE_COMMITMENT	0.00220751	0.0395954	0.465875	1.82428	0	69
SHIPP_DLBCL_VS_FOLLICULAR_LYMPHOMA_UP	0.00413223	0.0613588	0.51043	1.82423	1	43
HAN_JNK_SINGALING_UP	0.00408163	0.0613588	0.590795	1.82229	1	23
LENAOUR_DENDRITIC_CELL_MATURATION_UP	0.00211864	0.0395954	0.451329	1.82186	0	77
GO_MITOCHONDRIAL_GENOME_MAINTENANCE	0.00204082	0.0395954	0.623817	1.82071	0	19
GSE24210_RESTING_TREG_VS_TCONV_DN	0.00236967	0.0395954	0.399583	1.81867	0	168
HOFFMANN_SMALL_PRE_BII_TO_IMMATURE_B_LYMPHOCYTE_UP	0.00404858	0.0613588	0.488554	1.81743	1	51
GO_REGULATION_OF_VIRAL_ENTRY_INTO_HOST_CELL	0.0040568	0.0613588	0.655901	1.81709	1	16
KEGG_PRION_DISEASES	0.00214133	0.0395954	0.577898	1.81547	0	27
TONKS_TARGETS_OF_RUNX1_RUNX1T1_FUSION_MONOCYTE_DN	0.00622407	0.074129	0.51856	1.81495	2	38
GO_POSITIVE_REGULATION_OF_CYCLIN_DEPENDENT_PROTEIN_KINASE_ACTIVITY	0.00404858	0.0613588	0.592457	1.8142	1	22
GSE2706_UNSTIM_VS_2H_R848_DC_DN	0.00219298	0.0395954	0.408124	1.8134	0	130
GSE11961_MEMORY_BCELL_DAY7_VS_GERMINAL_CENTER_BCELL_DAY40_UP	0.00222222	0.0395954	0.408562	1.81271	0	133
GSE33424_CD161_INT_VS_NEG_CD8_TCELL_UP	0.0023753	0.0395954	0.40228	1.81198	0	158
GO_CARDIAC_VENTRICLE_MORPHOGENESIS	0.004	0.0613588	0.601096	1.81084	1	21
GSE36392_EOSINOPHIL_VS_NEUTROPHIL_IL25_TREATED_LUNG_DN	0.00236967	0.0395954	0.397855	1.8108	0	168
MANALO_HYPOXIA_DN	0.00224719	0.0395954	0.375688	1.81064	0	259
GO_RIBONUCLEOPROTEIN_COMPLEX_BINDING	0.00210526	0.0395954	0.43822	1.81056	0	83
GCM_DDX5	0.00210084	0.0395954	0.467937	1.81044	0	63
KUROZUMI_RESPONSE_TO_ONCOCYTIC_VIRUS	0.00214133	0.0395954	0.575934	1.8093	0	27
KEGG_COMPLEMENT_AND_COAGULATION_CASCADES	0.00407332	0.0613588	0.611194	1.80876	1	20
GSE369_SOCS3_KO_VS_WT_LIVER_UP	0.00236967	0.0395954	0.394543	1.80586	0	173
WONG_ADULT_TISSUE_STEM_MODULE	0.00234742	0.0395954	0.356687	1.80443	0	406
MODULE_110	0.00608519	0.0737892	0.650699	1.80268	2	16
TTCNRGNNNNTTC_V$HSF_Q6	0.00211416	0.0395954	0.433243	1.80174	0	87
GO_OSTEOBLAST_DIFFERENTIATION	0.00217865	0.0395954	0.454765	1.80005	0	71
MODULE_35	0.00608519	0.0737892	0.649512	1.79939	2	16
E2F3_UP.V1_DN	0.00207039	0.0395954	0.466111	1.79792	0	62
NAKAYAMA_SOFT_TISSUE_TUMORS_PCA2_DN	0.00598802	0.0734096	0.57541	1.79601	2	24
GSE42021_CD24INT_VS_CD24LOW_TCONV_THYMUS_DN	0.00220751	0.0395954	0.417898	1.79576	0	110
GSE22886_NEUTROPHIL_VS_MONOCYTE_DN	0.00235294	0.0395954	0.390347	1.79571	0	183
GO_AMINO_ACID_BINDING	0.00412371	0.0613588	0.496281	1.79544	1	46
GSE42021_CD24INT_VS_CD24LOW_TREG_THYMUS_DN	0.00221239	0.0395954	0.417013	1.79512	0	112
GSE14415_INDUCED_TREG_VS_FOXP3_KO_INDUCED_TREG_IL2_CULTURE_UP	0.00221729	0.0395954	0.403642	1.79369	0	132
GSE3039_ALPHABETA_CD8_TCELL_VS_B1_BCELL_DN	0.00231481	0.0395954	0.398882	1.79354	0	154
ONDER_CDH1_SIGNALING_VIA_CTNNB1	0.00622407	0.074129	0.512439	1.79352	2	38
REACTOME_TRANSPORT_OF_GLUCOSE_AND_OTHER_SUGARS_BILE_SALTS_AND_ORGANIC_ACIDS_METAL_IONS_AND_AMINE_COMPOUNDS	0.00641026	0.0748712	0.540728	1.79255	2	33
GSE37301_LYMPHOID_PRIMED_MPP_VS_RAG2_KO_NK_CELL_UP	0.00236967	0.0395954	0.398952	1.79253	0	156
GO_RESPONSE_TO_KETONE	0.00215517	0.0395954	0.419048	1.79135	0	103
GSE10325_BCELL_VS_MYELOID_UP	0.00221729	0.0395954	0.41202	1.79117	0	120
GSE16385_ROSIGLITAZONE_IL4_VS_IL4_ALONE_STIM_MACROPHAGE_12H_UP	0.00236967	0.0395954	0.398599	1.79095	0	156
GSE42724_NAIVE_BCELL_VS_PLASMABLAST_UP	0.00229358	0.0395954	0.403031	1.7909	0	139
SNF5_DN.V1_UP	0.00221239	0.0395954	0.413868	1.79082	0	116
GSE19198_CTRL_VS_IL21_TREATED_TCELL_24H_UP	0.00229358	0.0395954	0.403081	1.79049	0	138
REACTOME_PEPTIDE_LIGAND_BINDING_RECEPTORS	0.00408163	0.0613588	0.491373	1.79018	1	47
GO_TOXIN_TRANSPORT	0.00431034	0.0613588	0.54431	1.79014	1	32
GO_POSITIVE_REGULATION_OF_T_CELL_MEDIATED_IMMUNITY	0.00813008	0.0827548	0.636526	1.78856	3	17
GSE22140_HEALTHY_VS_ARTHRITIC_GERMFREE_MOUSE_CD4_TCELL_DN	0.00234742	0.0395954	0.394383	1.78828	0	162
WELCH_GATA1_TARGETS	0.00408163	0.0613588	0.612548	1.78782	1	19
GO_REGULATION_OF_I_KAPPAB_KINASE_NF_KAPPAB_SIGNALING	0.00234192	0.0395954	0.388771	1.78566	0	177
GSE10325_LUPUS_BCELL_VS_LUPUS_MYELOID_UP	0.00221729	0.0395954	0.401678	1.78496	0	132
JAATINEN_HEMATOPOIETIC_STEM_CELL_DN	0.00226757	0.0395954	0.402198	1.78385	0	135
GSE12392_CD8A_POS_VS_NEG_SPLEEN_IFNB_KO_DC_DN	0.0023753	0.0395954	0.390285	1.78374	0	172
JACKSON_DNMT1_TARGETS_UP	0.00205761	0.0395954	0.467702	1.78282	0	57
MODULE_121	0.00603622	0.0737736	0.474517	1.78238	2	52
BILD_MYC_ONCOGENIC_SIGNATURE	0.00226244	0.0395954	0.399178	1.78232	0	141
CADWELL_ATG16L1_TARGETS_UP	0.00833333	0.0836147	0.51735	1.78231	3	36
GSE339_CD4POS_VS_CD8POS_DC_DN	0.00235294	0.0395954	0.394413	1.78139	0	160
GSE18791_UNSTIM_VS_NEWCATSLE_VIRUS_DC_10H_DN	0.00220751	0.0395954	0.409912	1.78097	0	117
GO_CLATHRIN_MEDIATED_ENDOCYTOSIS	0.00214133	0.0395954	0.566658	1.78016	0	27
GO_B_CELL_ACTIVATION	0.00211416	0.0395954	0.428025	1.78005	0	87
GO_RESPONSE_TO_HEAT	0.00607287	0.0737736	0.478448	1.77983	2	51
GO_INORGANIC_ANION_TRANSPORT	0.00630252	0.0743606	0.51353	1.77955	2	37
GO_RESPONSE_TO_INTERFERON_ALPHA	0.00199203	0.0395954	0.653496	1.77917	0	15
MONNIER_POSTRADIATION_TUMOR_ESCAPE_UP	0.00227273	0.0395954	0.361514	1.77708	0	308
GO_REGULATION_OF_PROTEIN_LOCALIZATION_TO_NUCLEUS	0.00232019	0.0395954	0.394149	1.77375	0	152
GSE6259_33D1_POS_DC_VS_CD4_TCELL_DN	0.00232019	0.0395954	0.394102	1.77354	0	152
SMIRNOV_CIRCULATING_ENDOTHELIOCYTES_IN_CANCER_UP	0.00223214	0.0395954	0.411837	1.77337	0	115
GO_ORGAN_REGENERATION	0.00411523	0.0613588	0.465203	1.7733	1	57
LINDGREN_BLADDER_CANCER_HIGH_RECURRENCE	0.00431034	0.0613588	0.551386	1.77319	1	30
GSE19198_CTRL_VS_IL21_TREATED_TCELL_6H_UP	0.00234742	0.0395954	0.39103	1.77307	0	162
GSE22886_DAY0_VS_DAY1_MONOCYTE_IN_CULTURE_DN	0.00231481	0.0395954	0.391129	1.7721	0	161
GSE13485_CTRL_VS_DAY7_YF17D_VACCINE_PBMC_DN	0.00235849	0.0395954	0.39518	1.76983	0	150
GO_LYMPHOCYTE_ACTIVATION_INVOLVED_IN_IMMUNE_RESPONSE	0.00207039	0.0395954	0.458663	1.76919	0	62
GSE41867_NAIVE_VS_EFFECTOR_CD8_TCELL_DN	0.00236967	0.0395954	0.386444	1.76879	0	173
GO_RESPONSE_TO_ETHANOL	0.00209644	0.0395954	0.440706	1.76875	0	75
GO_B_CELL_DIFFERENTIATION	0.00607287	0.0737736	0.467567	1.76869	2	54
VALK_AML_WITH_FLT3_ITD	0.00811359	0.0827548	0.638314	1.76837	3	16
P53_DN.V1_DN	0.00215517	0.0395954	0.420212	1.76801	0	95
YAGI_AML_FAB_MARKERS	0.00222222	0.0395954	0.398304	1.7672	0	133
GSE24634_TREG_VS_TCONV_POST_DAY7_IL4_CONVERSION_DN	0.00231481	0.0395954	0.395645	1.76712	0	143
GSE9960_GRAM_NEG_VS_GRAM_POS_SEPSIS_PBMC_UP	0.0021978	0.0395954	0.397079	1.76664	0	131
KEGG_CYTOSOLIC_DNA_SENSING_PATHWAY	0.00619835	0.0740204	0.502179	1.76501	2	39
GSE24634_TEFF_VS_TCONV_DAY7_IN_CULTURE_DN	0.00230947	0.0395954	0.392238	1.76444	0	151
GSE7568_IL4_TGFB_DEXAMETHASONE_VS_IL4_TGFB_TREATED_MACROPHAGE_UP	0.00234192	0.0395954	0.3936	1.76399	0	149
GO_CELLULAR_RESPONSE_TO_CORTICOSTEROID_STIMULUS	0.00831601	0.0836147	0.517499	1.76377	3	35
GSE11864_CSF1_IFNG_VS_CSF1_PAM3CYS_IN_MAC_DN	0.00221729	0.0395954	0.400672	1.7628	0	126
MODULE_248	0.00607287	0.0737736	0.465993	1.76274	2	54
GSE10325_CD4_TCELL_VS_MYELOID_DN	0.00232019	0.0395954	0.391688	1.76268	0	152
GNF2_MSH6	0.00643777	0.0748712	0.541127	1.76253	2	31
GSE6674_ANTI_IGM_VS_PL2_3_STIM_BCELL_DN	0.00239234	0.0395954	0.385863	1.76216	0	174
GO_POSITIVE_REGULATION_OF_I_KAPPAB_KINASE_NF_KAPPAB_SIGNALING	0.00228311	0.0395954	0.396614	1.76182	0	137
MARTORIATI_MDM4_TARGETS_FETAL_LIVER_DN	0.00238095	0.0395954	0.35174	1.76167	0	383
GSE13485_DAY1_VS_DAY7_YF17D_VACCINE_PBMC_DN	0.00234192	0.0395954	0.393071	1.76162	0	149
GSE24634_IL4_VS_CTRL_TREATED_NAIVE_CD4_TCELL_DAY5_UP	0.00232558	0.0395954	0.393315	1.76085	0	148
MILI_PSEUDOPODIA_CHEMOTAXIS_UP	0.00412371	0.0613588	0.456284	1.76048	1	61
GO_CELLULAR_RESPONSE_TO_CYTOKINE_STIMULUS	0.00230947	0.0395954	0.352908	1.75968	0	341
GSE21360_NAIVE_VS_QUATERNARY_MEMORY_CD8_TCELL_UP	0.00238095	0.0395954	0.38641	1.75964	0	169
GO_POSITIVE_REGULATION_OF_VASCULAR_ENDOTHELIAL_GROWTH_FACTOR_PRODUCTION	0.00398406	0.0613588	0.64605	1.7589	1	15
MORF_SMC1L1	0.00203252	0.0395954	0.456116	1.75832	0	60
ABE_VEGFA_TARGETS_30MIN	0.00811359	0.0827548	0.634586	1.75804	3	16
GSE3982_MAST_CELL_VS_BASOPHIL_UP	0.00221729	0.0395954	0.404328	1.75773	0	120
HOEBEKE_LYMPHOID_STEM_CELL_UP	0.00221729	0.0395954	0.447477	1.75689	0	70
BURTON_ADIPOGENESIS_PEAK_AT_8HR	0.00643777	0.0748712	0.53927	1.75649	2	31
URS_ADIPOCYTE_DIFFERENTIATION_UP	0.00622407	0.074129	0.501545	1.75539	2	38
GRESHOCK_CANCER_COPY_NUMBER_UP	0.00227273	0.0395954	0.366479	1.75524	0	242
GO_PURINE_NTP_DEPENDENT_HELICASE_ACTIVITY	0.00214592	0.0395954	0.421914	1.75459	0	88
GSE22886_UNSTIM_VS_IL2_STIM_NKCELL_DN	0.00236967	0.0395954	0.381452	1.75412	0	182
GSE40655_FOXO1_KO_VS_WT_NTREG_UP	0.0023753	0.0395954	0.38716	1.75357	0	163
GSE21360_SECONDARY_VS_QUATERNARY_MEMORY_CD8_TCELL_UP	0.00230415	0.0395954	0.39175	1.75308	0	147
GSE6674_ANTI_IGM_VS_CPG_STIM_BCELL_DN	0.00234742	0.0395954	0.386522	1.75264	0	162
GSE36891_UNSTIM_VS_POLYIC_TLR3_STIM_PERITONEAL_MACROPHAGE_DN	0.00234742	0.0395954	0.38486	1.75065	0	166
GO_CELLULAR_RESPONSE_TO_ORGANIC_CYCLIC_COMPOUND	0.00225734	0.0395954	0.358245	1.75062	0	290
GSE13485_DAY7_VS_DAY21_YF17D_VACCINE_PBMC_UP	0.00228311	0.0395954	0.391131	1.75018	0	146
GSE3982_BCELL_VS_BASOPHIL_UP	0.00220751	0.0395954	0.402779	1.74998	0	117
NAKAYAMA_SOFT_TISSUE_TUMORS_PCA1_UP	0.00619835	0.0740204	0.497865	1.74985	2	39
MODULE_46	0.00229358	0.0395954	0.372978	1.7497	0	210
ZHANG_TLX_TARGETS_UP	0.00210084	0.0395954	0.42798	1.7497	0	80
MORF_PRKDC	0.00234192	0.0395954	0.380924	1.74962	0	177
TCTAGAG,MIR-517	0.00643777	0.0748712	0.537104	1.74943	2	31
MARKEY_RB1_ACUTE_LOF_DN	0.00232558	0.0395954	0.379816	1.7493	0	180
GO_NLS_BEARING_PROTEIN_IMPORT_INTO_NUCLEUS	0.00610998	0.073822	0.590843	1.74853	2	20
HALLMARK_IL6_JAK_STAT3_SIGNALING	0.00211864	0.0395954	0.443125	1.74834	0	67
GSE43863_NAIVE_VS_MEMORY_LY6C_INT_CXCR5POS_CD4_TCELL_D150_LCMV_DN	0.00234742	0.0395954	0.384214	1.7477	0	166
GO_INACTIVATION_OF_MAPK_ACTIVITY	0.01002	0.0884607	0.608766	1.74612	4	18
GSE1432_CTRL_VS_IFNG_6H_MICROGLIA_DN	0.00228311	0.0395954	0.390087	1.74551	0	146
SERVITJA_ISLET_HNF1A_TARGETS_UP	0.00211864	0.0395954	0.442286	1.74503	0	67
DANG_MYC_TARGETS_UP	0.00221239	0.0395954	0.394902	1.74478	0	129
GSE19401_UNSTIM_VS_RETINOIC_ACID_AND_PAM2CSK4_STIM_FOLLICULAR_DC_DN	0.00230947	0.0395954	0.387815	1.74454	0	151
GO_ORGANIC_ACID_BINDING	0.00214592	0.0395954	0.415238	1.74424	0	93
GRAESSMANN_RESPONSE_TO_MC_AND_SERUM_DEPRIVATION_UP	0.00222717	0.0395954	0.397543	1.74368	0	124
GSE10325_CD4_TCELL_VS_BCELL_DN	0.00220751	0.0395954	0.401292	1.74352	0	117
GSE29618_BCELL_VS_MONOCYTE_UP	0.00223714	0.0395954	0.397163	1.74349	0	125
HUMMERICH_SKIN_CANCER_PROGRESSION_UP	0.00412371	0.0613588	0.451574	1.7423	1	61
GSE6269_FLU_VS_STREP_PNEUMO_INF_PBMC_UP	0.00224719	0.0395954	0.392714	1.74225	0	134
GO_REGULATION_OF_TELOMERE_MAINTENANCE_VIA_TELOMERE_LENGTHENING	0.00618557	0.0740204	0.48114	1.74066	2	46
DACOSTA_ERCC3_ALLELE_XPCS_VS_TTD_DN	0.00816327	0.0828404	0.596102	1.73982	3	19
GSE26343_UNSTIM_VS_LPS_STIM_MACROPHAGE_UP	0.002331	0.0395954	0.386732	1.7387	0	155
GSE40666_WT_VS_STAT4_KO_CD8_TCELL_UP	0.00612245	0.0739059	0.490054	1.73863	2	40
chr20p13	0.00646552	0.0748712	0.528618	1.73853	2	32
LEE_TARGETS_OF_PTCH1_AND_SUFU_UP	0.00646552	0.0748712	0.540011	1.73661	2	30
GSE1432_CTRL_VS_IFNG_24H_MICROGLIA_DN	0.00231481	0.0395954	0.388558	1.73547	0	143
WELCSH_BRCA1_TARGETS_DN	0.0021978	0.0395954	0.390051	1.73538	0	131
GO_LYMPHOCYTE_ACTIVATION	0.00226244	0.0395954	0.366294	1.73524	0	226
GSE45739_NRAS_KO_VS_WT_ACD3_ACD28_STIM_CD4_TCELL_UP	0.00230947	0.0395954	0.385725	1.73514	0	151
GSE24142_EARLY_THYMIC_PROGENITOR_VS_DN2_THYMOCYTE_FETAL_UP	0.002331	0.0395954	0.385925	1.73507	0	155
GO_RIBOSOME_BINDING	0.00619835	0.0740204	0.493158	1.73331	2	39
GO_TETRAPYRROLE_METABOLIC_PROCESS	0.00609756	0.0738053	0.487294	1.73307	2	41
GSE6259_FLT3L_INDUCED_DEC205_POS_DC_VS_CD8_TCELL_DN	0.00229358	0.0395954	0.387841	1.73247	0	142
GSE21360_NAIVE_VS_PRIMARY_MEMORY_CD8_TCELL_DN	0.00231481	0.0395954	0.385258	1.73229	0	154
MODULE_133	0.0059761	0.0733979	0.635986	1.7315	2	15
MODULE_75	0.00228311	0.0395954	0.368939	1.73149	0	216
GSE42021_CD24HI_VS_CD24LOW_TREG_THYMUS_DN	0.00217391	0.0395954	0.406051	1.73142	0	105
GO_ADAPTIVE_IMMUNE_RESPONSE_BASED_ON_SOMATIC_RECOMBINATION_OF_IMMUNE_RECEPTORS_BUILT_FROM_IMMUNOGLOBULIN_SUPERFAMILY_DOMAINS	0.0021645	0.0395954	0.434139	1.7308	0	73
GUO_HEX_TARGETS_DN	0.00618557	0.0740204	0.478074	1.72957	2	46
GSE17974_0H_VS_4H_IN_VITRO_ACT_CD4_TCELL_DN	0.00224719	0.0395954	0.389656	1.72869	0	134
GSE14415_ACT_VS_CTRL_NATURAL_TREG_DN	0.00232558	0.0395954	0.389489	1.72758	0	140
ELVIDGE_HIF1A_TARGETS_UP	0.00607287	0.0737736	0.456653	1.72741	2	54
GNF2_SNRK	0.0161943	0.112519	0.564071	1.72727	7	22
GSE22140_GERMFREE_VS_SPF_MOUSE_CD4_TCELL_UP	0.00234192	0.0395954	0.385382	1.72716	0	149
GO_UNFOLDED_PROTEIN_BINDING	0.00209644	0.0395954	0.430229	1.7267	0	75
GO_CELLULAR_RESPONSE_TO_STEROID_HORMONE_STIMULUS	0.00224215	0.0395954	0.392397	1.72565	0	128
GAUSSMANN_MLL_AF4_FUSION_TARGETS_G_DN	0.00610998	0.073822	0.583098	1.72561	2	20
GSE40274_CTRL_VS_HELIOS_TRANSDUCED_ACTIVATED_CD4_TCELL_DN	0.00218818	0.0395954	0.391154	1.72508	0	127
GSE6090_UNSTIM_VS_DC-SIGN_STIM_DC_DN	0.00619835	0.0740204	0.482675	1.72504	2	43
GO_RESPONSE_TO_HYPEROXIA	0.0059761	0.0733979	0.633488	1.7247	2	15
GO_RESPONSE_TO_INCREASED_OXYGEN_LEVELS	0.0059761	0.0733979	0.633488	1.7247	2	15
GO_REGULATION_OF_PROTEIN_IMPORT_INTO_NUCLEUS_TRANSLOCATION	0.01002	0.0884607	0.601089	1.7241	4	18
SENESE_HDAC1_AND_HDAC2_TARGETS_UP	0.00232558	0.0395954	0.388674	1.72397	0	140
GSE17974_CTRL_VS_ACT_IL4_AND_ANTI_IL12_4H_CD4_TCELL_DN	0.00230415	0.0395954	0.385192	1.72374	0	147
GSE16385_MONOCYTE_VS_12H_IFNG_TNF_TREATED_MACROPHAGE_UP	0.00232019	0.0395954	0.383014	1.72364	0	152
QI_PLASMACYTOMA_DN	0.00406504	0.0613588	0.446968	1.72305	1	60
GSE18281_PERIMEDULLARY_CORTICAL_REGION_VS_WHOLE_MEDULLA_THYMUS_UP	0.00218341	0.0395954	0.400828	1.72221	0	109
GO_REGULATION_OF_PLASMA_LIPOPROTEIN_PARTICLE_LEVELS	0.00631579	0.0743606	0.541638	1.72097	2	28
GSE3039_ALPHAALPHA_CD8_TCELL_VS_B2_BCELL_DN	0.00230415	0.0395954	0.384432	1.72033	0	147
GSE17721_PAM3CSK4_VS_CPG_24H_BMDC_DN	0.00235294	0.0395954	0.380882	1.72027	0	160
LIEN_BREAST_CARCINOMA_METAPLASTIC_VS_DUCTAL_UP	0.00831601	0.0836147	0.504725	1.72023	3	35
GSE14000_UNSTIM_VS_16H_LPS_DC_TRANSLATED_RNA_DN	0.00226244	0.0395954	0.394424	1.7201	0	122
V$NMYC_01	0.00236967	0.0395954	0.375744	1.71982	0	173
GSE19401_RETINOIC_ACID_VS_RETINOIC_ACID_AND_PAM2CSK4_STIM_FOLLICULAR_DC_UP	0.00218341	0.0395954	0.405893	1.71923	0	101
GSE22432_MULTIPOTENT_VS_COMMON_DC_PROGENITOR_UNTREATED_DN	0.00235294	0.0395954	0.374256	1.71917	0	178
MODULE_209	0.00609756	0.0738053	0.483344	1.71902	2	41
GSE37533_PPARG1_FOXP3_VS_FOXP3_TRANSDUCED_CD4_TCELL_DN	0.00229358	0.0395954	0.384118	1.71846	0	145
GSE2405_S_AUREUS_VS_A_PHAGOCYTOPHILUM_NEUTROPHIL_UP	0.00225225	0.0395954	0.399493	1.71805	0	114
REACTOME_AMINO_ACID_AND_OLIGOPEPTIDE_SLC_TRANSPORTERS	0.008	0.0826255	0.570206	1.71778	3	21
GSE17721_CPG_VS_GARDIQUIMOD_6H_BMDC_UP	0.00219298	0.0395954	0.386404	1.71689	0	130
HOELZEL_NF1_TARGETS_UP	0.00408998	0.0613588	0.449938	1.71681	1	58
DORN_ADENOVIRUS_INFECTION_48HR_DN	0.00642398	0.0748712	0.54648	1.71677	2	27
GSE13493_DP_VS_CD4INTCD8POS_THYMOCYTE_DN	0.00226244	0.0395954	0.384342	1.71608	0	141
GSE39152_CD103_NEG_VS_POS_MEMORY_CD8_TCELL_DN	0.00230415	0.0395954	0.383413	1.71578	0	147
WINTER_HYPOXIA_METAGENE	0.0023753	0.0395954	0.380755	1.71502	0	158
GO_RNA_MODIFICATION	0.00214592	0.0395954	0.408129	1.71438	0	93
GSE42021_CD24HI_VS_CD24INT_TREG_THYMUS_DN	0.00229358	0.0395954	0.38588	1.71409	0	138
GO_POSITIVE_REGULATION_OF_INTERFERON_ALPHA_PRODUCTION	0.0059761	0.0733979	0.629517	1.71388	2	15
GO_REGULATION_OF_INTERFERON_GAMMA_PRODUCTION	0.00603622	0.0737736	0.453174	1.71358	2	53
GROSS_HYPOXIA_VIA_ELK3_ONLY_UP	0.00631579	0.0743606	0.539136	1.71302	2	28
NAKAMURA_METASTASIS_MODEL_UP	0.00642398	0.0748712	0.545279	1.713	2	27
GSE14386_UNTREATED_VS_IFNA_TREATED_ACT_PBMC_MS_PATIENT_UP	0.00414079	0.0613588	0.478144	1.71176	1	44
GNF2_ELAC2	0.00414079	0.0613588	0.478126	1.7117	1	44
GO_POSITIVE_REGULATION_OF_PHOSPHATIDYLINOSITOL_3_KINASE_SIGNALING	0.00628931	0.0743606	0.533057	1.71166	2	29
GO_NEUTRAL_AMINO_ACID_TRANSPORT	0.00811359	0.0827548	0.617837	1.71164	3	16
GSE5589_LPS_AND_IL10_VS_LPS_AND_IL6_STIM_IL6_KO_MACROPHAGE_45MIN_UP	0.0023753	0.0395954	0.37778	1.71108	0	163
GSE32986_UNSTIM_VS_CURDLAN_LOWDOSE_STIM_DC_UP	0.00235849	0.0395954	0.374133	1.71041	0	171
GSE21360_PRIMARY_VS_TERTIARY_MEMORY_CD8_TCELL_UP	0.00234192	0.0395954	0.373053	1.71004	0	175
GSE12003_4D_VS_8D_CULTURE_BM_PROGENITOR_UP	0.00218818	0.0395954	0.387557	1.70922	0	127
GO_RESPONSE_TO_ORGANOPHOSPHORUS	0.00210084	0.0395954	0.417682	1.70916	0	79
GSE46606_IRF4HIGH_VS_IRF4MID_CD40L_IL2_IL5_DAY1_STIMULATED_BCELL_DN	0.00211416	0.0395954	0.412758	1.70912	0	84
APRELIKOVA_BRCA1_TARGETS	0.00831601	0.0836147	0.501372	1.70881	3	35
V$MYCMAX_02	0.00229358	0.0395954	0.382494	1.70858	0	142
CHANGOLKAR_H2AFY_TARGETS_DN	0.00642398	0.0748712	0.543835	1.70846	2	27
LIU_SMARCA4_TARGETS	0.00642398	0.0748712	0.543824	1.70843	2	27
GO_LYMPHOCYTE_MEDIATED_IMMUNITY	0.00210084	0.0395954	0.441461	1.708	0	63
V$USF_C	0.00236967	0.0395954	0.372852	1.70658	0	173
GO_POSITIVE_REGULATION_OF_LIPID_TRANSPORT	0.00631579	0.0743606	0.536985	1.70619	2	28
GSE41867_DAY6_VS_DAY8_LCMV_ARMSTRONG_EFFECTOR_CD8_TCELL_DN	0.00239808	0.0395954	0.374854	1.70606	0	170
GSE22886_NAIVE_TCELL_VS_NEUTROPHIL_UP	0.00234192	0.0395954	0.371266	1.70526	0	177
OSWALD_HEMATOPOIETIC_STEM_CELL_IN_COLLAGEN_GEL_UP	0.00236967	0.0395954	0.372541	1.70516	0	173
GO_CAJAL_BODY	0.00619835	0.0740204	0.477069	1.705	2	43
GO_L_AMINO_ACID_TRANSMEMBRANE_TRANSPORTER_ACTIVITY	0.0102041	0.0892607	0.552622	1.70455	4	23
ENGELMANN_CANCER_PROGENITORS_UP	0.00858369	0.0837676	0.52325	1.7043	3	31
KEGG_CYTOKINE_CYTOKINE_RECEPTOR_INTERACTION	0.0021645	0.0395954	0.400311	1.70387	0	102
GSE9037_CTRL_VS_LPS_1H_STIM_IRAK4_KO_BMDM_DN	0.00229358	0.0395954	0.384266	1.7028	0	136
MODULE_84	0.00228833	0.0395954	0.342957	1.70274	0	332
GSE10325_LUPUS_CD4_TCELL_VS_LUPUS_MYELOID_DN	0.002331	0.0395954	0.374336	1.70179	0	165
EPPERT_PROGENITOR	0.00218341	0.0395954	0.396061	1.70173	0	109
JIANG_TIP30_TARGETS_DN	0.0059761	0.0733979	0.624875	1.70125	2	15
GO_RESPONSE_TO_CYTOKINE	0.00234742	0.0395954	0.335046	1.70116	0	419
GO_CYTOKINE_MEDIATED_SIGNALING_PATHWAY	0.0022779	0.0395954	0.354147	1.70108	0	248
GSE19923_E2A_KO_VS_E2A_AND_HEB_KO_DP_THYMOCYTE_DN	0.0023753	0.0395954	0.377639	1.70099	0	158
GOZGIT_ESR1_TARGETS_UP	0.00221729	0.0395954	0.433162	1.70069	0	70
GSE2706_R848_VS_LPS_2H_STIM_DC_DN	0.00213675	0.0395954	0.42641	1.70067	0	74
GSE24210_CTRL_VS_IL35_TREATED_TCONV_CD4_TCELL_DN	0.00234192	0.0395954	0.370243	1.70056	0	177
GSE18791_CTRL_VS_NEWCASTLE_VIRUS_DC_4H_DN	0.00221239	0.0395954	0.392452	1.69815	0	116
GSE37532_VISCERAL_ADIPOSE_TISSUE_VS_LN_DERIVED_TCONV_CD4_TCELL_UP	0.00603622	0.0737736	0.458613	1.69804	2	50
GSE40274_CTRL_VS_XBP1_TRANSDUCED_ACTIVATED_CD4_TCELL_DN	0.00229358	0.0395954	0.383191	1.69803	0	136
GSE45365_NK_CELL_VS_CD11B_DC_DN	0.00236967	0.0395954	0.376469	1.69791	0	159
GSE24634_TEFF_VS_TCONV_DAY3_IN_CULTURE_DN	0.00232558	0.0395954	0.382624	1.69713	0	140
BASSO_B_LYMPHOCYTE_NETWORK	0.00221729	0.0395954	0.385737	1.69709	0	126
GO_SERINE_FAMILY_AMINO_ACID_METABOLIC_PROCESS	0.00831601	0.0836147	0.539691	1.69658	3	26
AMUNDSON_RESPONSE_TO_ARSENITE	0.00238095	0.0395954	0.374223	1.69644	0	164
DORN_ADENOVIRUS_INFECTION_32HR_DN	0.00856531	0.0837676	0.539952	1.69626	3	27
GSE43955_TGFB_IL6_VS_TGFB_IL6_IL23_TH17_ACT_CD4_TCELL_52H_DN	0.002331	0.0395954	0.373072	1.69605	0	165
GSE4142_NAIVE_VS_GC_BCELL_DN	0.00229358	0.0395954	0.381675	1.696	0	139
GSE36826_WT_VS_IL1R_KO_SKIN_STAPH_AUREUS_INF_DN	0.00229358	0.0395954	0.378934	1.69527	0	145
TSAI_RESPONSE_TO_RADIATION_THERAPY	0.0121704	0.0967685	0.611921	1.69525	5	16
GO_NEGATIVE_REGULATION_OF_MAP_KINASE_ACTIVITY	0.00607287	0.0737736	0.455689	1.69517	2	51
GSE41176_WT_VS_TAK1_KO_ANTI_IGM_STIM_BCELL_3H_DN	0.00234192	0.0395954	0.369771	1.695	0	175
GO_REGULATION_OF_CELLULAR_RESPIRATION	0.0121704	0.0967685	0.611702	1.69465	5	16
GO_INORGANIC_ANION_TRANSMEMBRANE_TRANSPORTER_ACTIVITY	0.00646552	0.0748712	0.51515	1.69424	2	32
MILI_PSEUDOPODIA	0.00833333	0.0836147	0.491642	1.69374	3	36
STOSSI_RESPONSE_TO_ESTRADIOL	0.0121704	0.0967685	0.611233	1.69335	5	16
GSE17721_CTRL_VS_CPG_12H_BMDC_DN	0.00219298	0.0395954	0.381091	1.69329	0	130
GSE37533_PPARG1_FOXP3_VS_PPARG2_FOXP3_TRANSDUCED_CD4_TCELL_PIOGLITAZONE_TREATED_DN	0.00229358	0.0395954	0.379011	1.69303	0	142
GO_LEUKOCYTE_ACTIVATION	0.00226757	0.0395954	0.349066	1.6926	0	273
RUTELLA_RESPONSE_TO_HGF_VS_CSF2RB_AND_IL4_DN	0.00234742	0.0395954	0.367406	1.69228	0	184
MCBRYAN_PUBERTAL_BREAST_5_6WK_DN	0.00220751	0.0395954	0.393571	1.69124	0	111
BAKER_HEMATOPOIESIS_STAT3_TARGETS	0.00796813	0.0824874	0.621152	1.69111	3	15
GSE42021_TREG_PLN_VS_TREG_PRECURSORS_THYMUS_DN	0.00224215	0.0395954	0.384496	1.6909	0	128
GO_PIGMENT_GRANULE	0.00211416	0.0395954	0.408327	1.69078	0	84
MODULE_63	0.00211416	0.0395954	0.435229	1.69016	0	64
TAKEDA_TARGETS_OF_NUP98_HOXA9_FUSION_16D_UP	0.00210526	0.0395954	0.408964	1.68969	0	83
STK33_UP	0.00230415	0.0395954	0.361822	1.6884	0	201
GO_POSITIVE_REGULATION_OF_TELOMERE_MAINTENANCE_VIA_TELOMERE_LENGTHENING	0.00646552	0.0748712	0.524993	1.68831	2	30
GSE27786_CD4_TCELL_VS_NEUTROPHIL_UP	0.002331	0.0395954	0.371335	1.68815	0	165
GSE40274_CTRL_VS_FOXP3_AND_XBP1_TRANSDUCED_ACTIVATED_CD4_TCELL_UP	0.00223714	0.0395954	0.38438	1.68737	0	125
GO_POSITIVE_REGULATION_OF_TELOMERE_MAINTENANCE	0.00625	0.0743056	0.475461	1.68688	2	42
GSE17301_CTRL_VS_48H_ACD3_ACD28_IFNA2_STIM_CD8_TCELL_UP	0.0023753	0.0395954	0.368998	1.68646	0	172
GO_RESPONSE_TO_TEMPERATURE_STIMULUS	0.00210084	0.0395954	0.4121	1.68632	0	79
SCHLOSSER_MYC_TARGETS_REPRESSED_BY_SERUM	0.00229885	0.0395954	0.376807	1.68609	0	144
PLASARI_TGFB1_TARGETS_10HR_DN	0.00222717	0.0395954	0.389065	1.68595	0	119
GO_REGULATION_OF_T_CELL_MEDIATED_IMMUNITY	0.0126316	0.0988574	0.530594	1.68588	5	28
ZHANG_TLX_TARGETS_36HR_UP	0.00234742	0.0395954	0.37043	1.685	0	166
GSE27786_BCELL_VS_NEUTROPHIL_UP	0.00232558	0.0395954	0.365295	1.6849	0	179
GSE27670_CTRL_VS_LMP1_TRANSDUCED_GC_BCELL_DN	0.00229358	0.0395954	0.379303	1.68487	0	138
GSE22432_CONVENTIONAL_CDC_VS_PLASMACYTOID_PDC_UP	0.00235849	0.0395954	0.36853	1.68479	0	171
GSE40274_GATA1_VS_FOXP3_AND_GATA1_TRANSDUCED_ACTIVATED_CD4_TCELL_DN	0.0023753	0.0395954	0.373739	1.68342	0	158
GNF2_BUB3	0.00856531	0.0837676	0.535701	1.68291	3	27
GO_OSTEOCLAST_DIFFERENTIATION	0.0122449	0.096794	0.545495	1.68256	5	23
VANTVEER_BREAST_CANCER_BRCA1_UP	0.00798403	0.0825243	0.538963	1.68224	3	24
GO_NUCLEAR_IMPORT	0.00217391	0.0395954	0.394376	1.68163	0	105
GO_REGULATION_OF_CHROMATIN_SILENCING	0.012024	0.0963004	0.586226	1.68147	5	18
GO_RESPONSE_TO_ALCOHOL	0.00228833	0.0395954	0.359838	1.68109	0	203
GSE44649_WT_VS_MIR155_KO_NAIVE_CD8_TCELL_UP	0.00222717	0.0395954	0.387897	1.68089	0	119
MODULE_172	0.0101215	0.0888867	0.465045	1.68057	4	45
GSE36891_UNSTIM_VS_POLYIC_TLR3_STIM_PERITONEAL_MACROPHAGE_UP	0.00213675	0.0395954	0.421324	1.68039	0	74
GSE13522_CTRL_VS_T_CRUZI_Y_STRAIN_INF_SKIN_IFNG_KO_DN	0.00213675	0.0395954	0.420848	1.67849	0	74
GO_NEGATIVE_REGULATION_OF_INTRACELLULAR_STEROID_HORMONE_RECEPTOR_SIGNALING_PATHWAY	0.01222	0.0967685	0.567016	1.67802	5	20
MORI_IMMATURE_B_LYMPHOCYTE_UP	0.00618557	0.0740204	0.463732	1.67769	2	46
GSE3691_IFN_PRODUCING_KILLER_DC_VS_PLASMACYTOID_DC_SPLEEN_DN	0.00225225	0.0395954	0.390073	1.67754	0	114
GO_TRANSLATION_FACTOR_ACTIVITY_RNA_BINDING	0.00215054	0.0395954	0.421546	1.67752	0	72
GSE7568_IL4_VS_IL4_AND_TGFB_TREATED_MACROPHAGE_24H_DN	0.0023753	0.0395954	0.367	1.67732	0	172
MODULE_345	0.00414079	0.0613588	0.434769	1.67702	1	62
GO_AMMONIUM_TRANSPORT	0.00858369	0.0837676	0.514834	1.67689	3	31
GARGALOVIC_RESPONSE_TO_OXIDIZED_PHOSPHOLIPIDS_MAGENTA_UP	0.016	0.111691	0.556463	1.67638	7	21
MORF_BUB3	0.00220264	0.0395954	0.34562	1.67638	0	267
GSE36476_CTRL_VS_TSST_ACT_16H_MEMORY_CD4_TCELL_OLD_DN	0.00236967	0.0395954	0.368271	1.67615	0	168
MODULE_107	0.00842105	0.0837676	0.498836	1.6759	3	34
GSE42021_TCONV_PLN_VS_TREG_PRECURSORS_THYMUS_DN	0.0023753	0.0395954	0.366683	1.67587	0	172
GO_CALCIUM_ION_IMPORT_INTO_CYTOSOL	0.00809717	0.0827548	0.532401	1.67572	3	25
GO_CALCIUM_ION_TRANSMEMBRANE_IMPORT_INTO_CYTOSOL	0.00809717	0.0827548	0.532401	1.67572	3	25
GSE26343_UNSTIM_VS_LPS_STIM_NFAT5_KO_MACROPHAGE_UP	0.00231481	0.0395954	0.369725	1.67512	0	161
GO_RESPONSE_TO_CORTICOSTEROID	0.00217391	0.0395954	0.400508	1.67502	0	94
GO_CELLULAR_DEFENSE_RESPONSE	0.0146751	0.106039	0.521639	1.675	6	29
DUTERTRE_ESTRADIOL_RESPONSE_6HR_UP	0.00234742	0.0395954	0.36792	1.67359	0	166
MODULE_108	0.00858369	0.0837676	0.513719	1.67326	3	31
HELLER_HDAC_TARGETS_DN	0.00228311	0.0395954	0.356742	1.67259	0	215
GO_NEGATIVE_REGULATION_OF_MAPK_CASCADE	0.00215517	0.0395954	0.39116	1.67213	0	103
GSE29164_UNTREATED_VS_CD8_TCELL_TREATED_MELANOMA_DAY3_DN	0.00232558	0.0395954	0.373487	1.67208	0	148
GO_PROTEIN_LIPID_COMPLEX_SUBUNIT_ORGANIZATION	0.01222	0.0967685	0.564574	1.67079	5	20
HOFFMANN_LARGE_TO_SMALL_PRE_BII_LYMPHOCYTE_DN	0.0101215	0.0888867	0.46161	1.66816	4	45
GO_POSITIVE_REGULATION_OF_PROTEIN_TYROSINE_KINASE_ACTIVITY	0.0141988	0.104697	0.602043	1.66789	6	16
GO_CHAPERONE_BINDING	0.00211416	0.0395954	0.42949	1.66787	0	64
CONCANNON_APOPTOSIS_BY_EPOXOMICIN_UP	0.0023753	0.0395954	0.368239	1.66786	0	163
GO_CYTOSOLIC_CALCIUM_ION_TRANSPORT	0.0126316	0.0988574	0.524824	1.66755	5	28
XU_HGF_SIGNALING_NOT_VIA_AKT1_48HR_UP	0.0101215	0.0888867	0.529794	1.66751	4	25
GSE40274_CTRL_VS_IRF4_TRANSDUCED_ACTIVATED_CD4_TCELL_UP	0.00221729	0.0395954	0.375178	1.6672	0	132
GSE41867_NAIVE_VS_DAY30_LCMV_CLONE13_EXHAUSTED_CD8_TCELL_UP	0.00221729	0.0395954	0.390054	1.66699	0	107
GSE15330_LYMPHOID_MULTIPOTENT_VS_MEGAKARYOCYTE_ERYTHROID_PROGENITOR_DN	0.00229358	0.0395954	0.375277	1.66699	0	138
GSE27786_NKCELL_VS_NEUTROPHIL_UP	0.00234742	0.0395954	0.366315	1.66629	0	166
RYCACNNRNNRNCAG_UNKNOWN	0.010395	0.09034	0.488769	1.66585	4	35
GSE13485_CTRL_VS_DAY3_YF17D_VACCINE_PBMC_DN	0.00229358	0.0395954	0.372906	1.66575	0	142
GO_GLOMERULUS_DEVELOPMENT	0.0142566	0.104697	0.562734	1.66535	6	20
GO_IRON_ION_TRANSPORT	0.0104167	0.0903521	0.483368	1.66524	4	36
ABE_VEGFA_TARGETS_2HR	0.0140281	0.104366	0.580324	1.66454	6	18
GO_LEUKOCYTE_DIFFERENTIATION	0.00231481	0.0395954	0.357317	1.66415	0	195
GSE40666_UNTREATED_VS_IFNA_STIM_EFFECTOR_CD8_TCELL_90MIN_UP	0.00231481	0.0395954	0.372552	1.66397	0	143
CHANGOLKAR_H2AFY_TARGETS_UP	0.00862069	0.0837676	0.505814	1.66353	3	32
GSE21379_TFH_VS_NON_TFH_SAP_KO_CD4_TCELL_UP	0.00230415	0.0395954	0.371671	1.66323	0	147
GSE40685_TREG_VS_FOXP3_KO_TREG_PRECURSOR_UP	0.00224215	0.0395954	0.380509	1.66244	0	123
GSE360_T_GONDII_VS_B_MALAYI_HIGH_DOSE_MAC_UP	0.00221729	0.0395954	0.373991	1.66193	0	132
GSE6259_FLT3L_INDUCED_33D1_POS_DC_VS_BCELL_UP	0.00232019	0.0395954	0.369212	1.66153	0	152
chr11q14	0.0140281	0.104366	0.579122	1.66109	6	18
GO_REGULATION_OF_VASCULAR_ENDOTHELIAL_GROWTH_FACTOR_PRODUCTION	0.0162933	0.112855	0.561245	1.66094	7	20
GO_POSITIVE_REGULATION_OF_INTERFERON_GAMMA_PRODUCTION	0.00840336	0.0837676	0.479271	1.66083	3	37
WARTERS_IR_RESPONSE_5GY	0.0146751	0.106039	0.516984	1.66005	6	29
BERENJENO_TRANSFORMED_BY_RHOA_UP	0.0023753	0.0395954	0.324781	1.65834	0	455
GSE12392_WT_VS_IFNB_KO_CD8A_NEG_SPLEEN_DC_UP	0.002331	0.0395954	0.364706	1.65801	0	165
GO_ADAPTIVE_IMMUNE_RESPONSE	0.00221729	0.0395954	0.373003	1.65754	0	132
RADAEVA_RESPONSE_TO_IFNA1_UP	0.00816327	0.0828404	0.467089	1.65716	3	40
GO_PLACENTA_DEVELOPMENT	0.00221729	0.0395954	0.42201	1.6569	0	70
GO_P53_BINDING	0.0101215	0.0888867	0.458492	1.65689	4	45
GO_NEGATIVE_REGULATION_OF_PROTEIN_SECRETION	0.00804829	0.0826773	0.437924	1.65592	3	53
GSE13485_PRE_VS_POST_YF17D_VACCINATION_PBMC_DN	0.002331	0.0395954	0.368287	1.65577	0	155
GSE12392_WT_VS_IFNB_KO_CD8A_POS_SPLEEN_DC_DN	0.00217391	0.0395954	0.390725	1.65573	0	100
BIOCARTA_IL10_PATHWAY	0.00996016	0.0880483	0.607912	1.65506	4	15
GSE2706_UNSTIM_VS_2H_LPS_DC_DN	0.00221729	0.0395954	0.376112	1.65474	0	126
MORF_KDR	0.0168421	0.114755	0.520648	1.65428	7	28
GO_BASAL_TRANSCRIPTION_MACHINERY_BINDING	0.018	0.119489	0.548996	1.65389	8	21
GO_ANION_TRANSMEMBRANE_TRANSPORT	0.00429185	0.0613588	0.393632	1.65348	1	93
REACTOME_INTERFERON_SIGNALING	0.00220751	0.0395954	0.384729	1.65324	0	111
GSE9960_HEALTHY_VS_GRAM_POS_SEPSIS_PBMC_DN	0.00228311	0.0395954	0.372058	1.65274	0	137
GSE1460_DP_THYMOCYTE_VS_THYMIC_STROMAL_CELL_DN	0.00229358	0.0395954	0.371928	1.65269	0	139
BOYLAN_MULTIPLE_MYELOMA_C_D_UP	0.00217865	0.0395954	0.391301	1.65245	0	99
MODULE_292	0.0021645	0.0395954	0.414143	1.65108	0	73
GSE37533_PPARG2_FOXP3_VS_FOXP3_TRANSDUCED_CD4_TCELL_DN	0.00224719	0.0395954	0.372139	1.65097	0	134
GSE39820_CTRL_VS_TGFBETA3_IL6_CD4_TCELL_UP	0.0023753	0.0395954	0.363205	1.65074	0	167
CHYLA_CBFA2T3_TARGETS_DN	0.00222717	0.0395954	0.376338	1.65068	0	124
GNF2_CASP8	0.0182186	0.119918	0.538785	1.64984	8	22
GO_T_CELL_ACTIVATION_INVOLVED_IN_IMMUNE_RESPONSE	0.0107759	0.0922119	0.512986	1.6497	4	30
GSE22611_NOD2_TRANSDUCED_VS_CTRL_HEK293T_STIMULATED_WITH_MDP_2H_DN	0.00232019	0.0395954	0.36656	1.6496	0	152
GNF2_KPNB1	0.00220751	0.0395954	0.421252	1.64954	0	69
GO_DIGESTION	0.0107759	0.0922119	0.512843	1.64924	4	30
GSE27859_DC_VS_CD11C_INT_F480_INT_DC_DN	0.00234192	0.0395954	0.359661	1.64865	0	175
MODULE_263	0.01417	0.104652	0.523674	1.64825	6	25
GO_INNATE_IMMUNE_RESPONSE	0.00227273	0.0395954	0.335296	1.6482	0	308
WORSCHECH_TUMOR_REJECTION_UP	0.0107759	0.0922119	0.512447	1.64796	4	30
GSE14415_FOXP3_KO_NATURAL_TREG_VS_TCONV_DN	0.00224215	0.0395954	0.374612	1.64744	0	128
GSE37301_HEMATOPOIETIC_STEM_CELL_VS_RAG2_KO_NK_CELL_UP	0.00437637	0.0613588	0.373512	1.64728	1	127
GSE36392_MAC_VS_NEUTROPHIL_IL25_TREATED_LUNG_DN	0.00429185	0.0613588	0.392146	1.64724	1	93
HOOI_ST7_TARGETS_DN	0.00616016	0.0740204	0.433895	1.64688	2	56
BRACHAT_RESPONSE_TO_METHOTREXATE_UP	0.0121951	0.0967685	0.585987	1.64655	5	17
GSE14386_UNTREATED_VS_IFNA_TREATED_ACT_PBMC_MS_PATIENT_DN	0.00224215	0.0395954	0.376869	1.64654	0	123
GSE25123_WT_VS_PPARG_KO_MACROPHAGE_DN	0.00232019	0.0395954	0.36576	1.646	0	152
GSE29618_MONOCYTE_VS_MDC_UP	0.002331	0.0395954	0.3661	1.64594	0	155
GSE37301_LYMPHOID_PRIMED_MPP_VS_COMMON_LYMPHOID_PROGENITOR_DN	0.00236967	0.0395954	0.366319	1.64591	0	156
GO_PROTEIN_KINASE_C_BINDING	0.00854701	0.0837676	0.49636	1.64547	3	33
REACTOME_FORMATION_OF_TUBULIN_FOLDING_INTERMEDIATES_BY_CCT_TRIC	0.0121951	0.0967685	0.585471	1.64511	5	17
MODULE_254	0.00816327	0.0828404	0.451528	1.64501	3	47
HALLMARK_EPITHELIAL_MESENCHYMAL_TRANSITION	0.00210084	0.0395954	0.402371	1.645	0	80
GSE27786_CD8_TCELL_VS_NKCELL_UP	0.00229358	0.0395954	0.371108	1.64449	0	136
GO_IMMUNE_SYSTEM_DEVELOPMENT	0.00238663	0.0395954	0.328839	1.64445	0	381
JEPSEN_SMRT_TARGETS	0.02	0.125587	0.545732	1.64405	9	21
LEE_AGING_MUSCLE_DN	0.0146751	0.106039	0.511922	1.6438	6	29
GO_CARDIAC_MUSCLE_TISSUE_MORPHOGENESIS	0.0204082	0.127254	0.563107	1.64352	9	19
GSE16755_CTRL_VS_IFNA_TREATED_MAC_DN	0.00231481	0.0395954	0.367949	1.64342	0	143
WEINMANN_ADAPTATION_TO_HYPOXIA_UP	0.0141988	0.104697	0.592966	1.64274	6	16
LEE_METASTASIS_AND_RNA_PROCESSING_UP	0.0121951	0.0967685	0.584623	1.64272	5	17
MODULE_115	0.01417	0.104652	0.521916	1.64271	6	25
GSE35685_CD34POS_CD38NEG_VS_CD34POS_CD10POS_BONE_MARROW_DN	0.00238095	0.0395954	0.362248	1.64215	0	164
GO_CHEMOKINE_RECEPTOR_BINDING	0.016632	0.113787	0.522332	1.64201	7	26
GSE3337_4H_VS_16H_IFNG_IN_CD8POS_DC_UP	0.002331	0.0395954	0.357655	1.64156	0	176
GSE42088_UNINF_VS_LEISHMANIA_INF_DC_2H_UP	0.00221729	0.0395954	0.372963	1.64089	0	126
GSE2128_CTRL_VS_MIMETOPE_NEGATIVE_SELECTION_DP_THYMOCYTE_NOD_UP	0.00235849	0.0395954	0.36638	1.64085	0	150
MORF_AATF	0.00229358	0.0395954	0.352594	1.64074	0	198
GSE13547_CTRL_VS_ANTI_IGM_STIM_BCELL_12H_DN	0.00229885	0.0395954	0.366629	1.64055	0	144
KEGG_DRUG_METABOLISM_OTHER_ENZYMES	0.0183299	0.119948	0.554213	1.64013	8	20
GSE34006_A2AR_KO_VS_A2AR_AGONIST_TREATED_TREG_UP	0.0023753	0.0395954	0.364091	1.63996	0	158
GO_TETRAPYRROLE_BIOSYNTHETIC_PROCESS	0.01417	0.104652	0.520851	1.63936	6	25
GSE42021_TREG_PLN_VS_CD24INT_TREG_THYMUS_DN	0.00229358	0.0395954	0.36888	1.63914	0	139
MORF_UBE2N	0.00428266	0.0613588	0.39023	1.63894	1	92
GO_REGULATION_OF_EPIDERMAL_CELL_DIFFERENTIATION	0.0183299	0.119948	0.553709	1.63864	8	20
GSE22601_IMMATURE_CD4_SINGLE_POSITIVE_VS_CD8_SINGLE_POSITIVE_THYMOCYTE_DN	0.0023753	0.0395954	0.361713	1.63831	0	163
GO_PRERIBOSOME	0.00606061	0.0737736	0.43127	1.63808	2	55
chr5q31	0.00428266	0.0613588	0.389931	1.63768	1	92
MODULE_61	0.00813008	0.0827548	0.460407	1.63745	3	41
GO_CYCLIN_DEPENDENT_PROTEIN_KINASE_HOLOENZYME_COMPLEX	0.0171306	0.116448	0.521228	1.63744	7	27
GSE30083_SP2_VS_SP4_THYMOCYTE_DN	0.00449438	0.0613588	0.369064	1.63733	1	134
DAUER_STAT3_TARGETS_DN	0.010395	0.09034	0.480393	1.6373	4	35
GSE5542_IFNG_VS_IFNA_AND_IFNG_TREATED_EPITHELIAL_CELLS_6H_DN	0.00232558	0.0395954	0.36407	1.63677	0	153
HELLER_HDAC_TARGETS_SILENCED_BY_METHYLATION_DN	0.00230415	0.0395954	0.350471	1.63543	0	201
DER_IFN_BETA_RESPONSE_UP	0.00207469	0.0395954	0.392955	1.63537	0	85
GO_LIGASE_ACTIVITY_FORMING_CARBON_OXYGEN_BONDS	0.00833333	0.0836147	0.460723	1.63459	3	42
GSE25085_FETAL_BM_VS_ADULT_BM_SP4_THYMIC_IMPLANT_DN	0.00235849	0.0395954	0.357499	1.63436	0	171
GSE28737_WT_VS_BCL6_HET_FOLLICULAR_BCELL_DN	0.00226244	0.0395954	0.36597	1.63405	0	141
GSE36009_WT_VS_NLRP10_KO_DC_UP	0.00235849	0.0395954	0.364846	1.63398	0	150
GSE21546_WT_VS_SAP1A_KO_DP_THYMOCYTES_UP	0.00447427	0.0613588	0.372163	1.63374	1	125
GSE34156_UNTREATED_VS_6H_NOD2_AND_TLR1_TLR2_LIGAND_TREATED_MONOCYTE_DN	0.00449438	0.0613588	0.368031	1.63274	1	134
GSE6259_FLT3L_INDUCED_33D1_POS_DC_VS_CD8_TCELL_UP	0.00215517	0.0395954	0.387914	1.63212	0	95
HUNSBERGER_EXERCISE_REGULATED_GENES	0.0162602	0.112742	0.580812	1.63201	7	17
GSE18791_CTRL_VS_NEWCASTLE_VIRUS_DC_8H_DN	0.00222717	0.0395954	0.376608	1.63197	0	119
GSE24634_TREG_VS_TCONV_POST_DAY3_IL4_CONVERSION_DN	0.0023753	0.0395954	0.360313	1.63197	0	163
GSE7764_IL15_NK_CELL_24H_VS_SPLENOCYTE_DN	0.00236967	0.0395954	0.361753	1.63154	0	159
GO_RESPONSE_TO_TRANSITION_METAL_NANOPARTICLE	0.00211416	0.0395954	0.392273	1.63136	0	87
GSE21546_WT_VS_SAP1A_KO_AND_ELK1_KO_DP_THYMOCYTES_DN	0.0044843	0.0613588	0.370934	1.63126	1	128
CACCAGC,MIR-138	0.00449438	0.0613588	0.367686	1.63122	1	134
BROWNE_INTERFERON_RESPONSIVE_GENES	0.00804829	0.0826773	0.440401	1.63062	3	50
GSE43863_NAIVE_VS_LY6C_LOW_CXCR5NEG_CD4_EFF_TCELL_D6_LCMV_DN	0.00437637	0.0613588	0.369703	1.63048	1	127
GSE3920_UNTREATED_VS_IFNA_TREATED_ENDOTHELIAL_CELL_UP	0.0023753	0.0395954	0.36198	1.63045	0	158
GO_RESPONSE_TO_DRUG	0.00225734	0.0395954	0.338745	1.62996	0	246
GO_REGULATION_OF_LYMPHOCYTE_CHEMOTAXIS	0.0159363	0.111622	0.598647	1.62984	7	15
TAKEDA_TARGETS_OF_NUP98_HOXA9_FUSION_3D_UP	0.00428266	0.0613588	0.388043	1.62975	1	92
GSE3337_4H_VS_16H_IFNG_IN_CD8POS_DC_DN	0.00226244	0.0395954	0.364792	1.62879	0	141
GSE23398_WT_VS_IL2_KO_CD4_TCELL_SCURFY_MOUSE_UP	0.00231481	0.0395954	0.364611	1.62851	0	143
GSE3982_CTRL_VS_LPS_4H_MAC_DN	0.00229885	0.0395954	0.363897	1.62832	0	144
GO_POSITIVE_REGULATION_OF_INTERLEUKIN_10_PRODUCTION	0.0220441	0.13293	0.567596	1.62803	10	18
WU_SILENCED_BY_METHYLATION_IN_BLADDER_CANCER	0.018711	0.12084	0.517784	1.62771	8	26
GO_RESPONSE_TO_NUTRIENT	0.00220751	0.0395954	0.378788	1.6277	0	110
GSE18281_SUBCAPSULAR_VS_CENTRAL_CORTICAL_REGION_OF_THYMUS_DN	0.00235849	0.0395954	0.355989	1.62746	0	171
TGATTTRY_V$GFI1_01	0.00218341	0.0395954	0.384186	1.62729	0	101
GSE43863_TFH_VS_LY6C_INT_CXCR5POS_EFFECTOR_CD4_TCELL_UP	0.00234192	0.0395954	0.363049	1.62707	0	149
MORF_DNMT1	0.00220751	0.0395954	0.378626	1.62701	0	111
GO_POSITIVE_REGULATION_OF_INTERLEUKIN_12_PRODUCTION	0.02	0.125587	0.539971	1.6267	9	21
GO_REGULATION_OF_CELL_AGING	0.0139721	0.104366	0.521153	1.62665	6	24
GO_GLYCEROLIPID_CATABOLIC_PROCESS	0.022449	0.134644	0.557208	1.6263	10	19
DELYS_THYROID_CANCER_UP	0.00226757	0.0395954	0.338218	1.62621	0	247
GO_POSITIVE_REGULATION_OF_LEUKOCYTE_CHEMOTAXIS	0.00809717	0.0827548	0.437112	1.62606	3	51
GSE33292_DN3_THYMOCYTE_VS_TCF1_KO_TCELL_LYMPHOMA_UP	0.00231481	0.0395954	0.364022	1.62588	0	143
CASTELLANO_NRAS_TARGETS_UP	0.00826446	0.0834243	0.454844	1.62557	3	43
GO_CELLULAR_RESPONSE_TO_EXTERNAL_STIMULUS	0.00234192	0.0395954	0.353775	1.62493	0	177
HALLMARK_NOTCH_SIGNALING	0.02	0.125587	0.539187	1.62433	9	21
GO_POSITIVE_REGULATION_OF_CALCIUM_ION_TRANSPORT_INTO_CYTOSOL	0.0202429	0.126518	0.530314	1.6239	9	22
V$AP1_01	0.0044843	0.0613588	0.369058	1.62301	1	128
GSE1925_CTRL_VS_3H_IFNG_STIM_MACROPHAGE_UP	0.002331	0.0395954	0.360974	1.62289	0	155
ATAGGAA,MIR-202	0.00211864	0.0395954	0.402037	1.62289	0	77
GSE11057_EFF_MEM_VS_CENT_MEM_CD4_TCELL_DN	0.00215517	0.0395954	0.38572	1.62289	0	95
GSE34156_UNTREATED_VS_6H_NOD2_LIGAND_TREATED_MONOCYTE_DN	0.00449438	0.0613588	0.365506	1.62155	1	134
CRX_DN.V1_DN	0.00217391	0.0395954	0.413205	1.6211	0	68
GSE24574_BCL6_HIGH_TFH_VS_TCONV_CD4_TCELL_UP	0.00220751	0.0395954	0.377125	1.62055	0	110
GO_REGULATION_OF_LEUKOCYTE_APOPTOTIC_PROCESS	0.00804829	0.0826773	0.428459	1.62013	3	53
JAATINEN_HEMATOPOIETIC_STEM_CELL_UP	0.00239808	0.0395954	0.355933	1.61995	0	170
GO_REGULATION_OF_DNA_BIOSYNTHETIC_PROCESS	0.0021645	0.0395954	0.406276	1.61972	0	73
KEGG_AMINOACYL_TRNA_BIOSYNTHESIS	0.0123967	0.0977052	0.460626	1.61897	5	39
FOSTER_TOLERANT_MACROPHAGE_DN	0.00231481	0.0395954	0.32955	1.61887	0	310
MODULE_312	0.0147059	0.10609	0.467059	1.61851	6	37
SANSOM_APC_TARGETS_UP	0.00213675	0.0395954	0.405714	1.61814	0	74
WOOD_EBV_EBNA1_TARGETS_DN	0.0105263	0.0907734	0.4816	1.61799	4	34
GO_CYTOKINE_PRODUCTION	0.00220751	0.0395954	0.413143	1.61779	0	69
V$PTF1BETA_Q6	0.00436681	0.0613588	0.371327	1.61776	1	118
MORF_EIF3S2	0.00227273	0.0395954	0.340285	1.61749	0	234
MORF_RFC4	0.00229358	0.0395954	0.363971	1.61733	0	139
GO_VENTRICULAR_CARDIAC_MUSCLE_TISSUE_DEVELOPMENT	0.0240481	0.140701	0.563691	1.61683	11	18
GO_NEGATIVE_REGULATION_OF_EXTRINSIC_APOPTOTIC_SIGNALING_PATHWAY	0.00406504	0.0613588	0.419315	1.61645	1	60
GSE7852_LN_VS_FAT_TCONV_DN	0.00230947	0.0395954	0.35934	1.61645	0	151
GSE21033_CTRL_VS_POLYIC_STIM_DC_24H_UP	0.00221239	0.0395954	0.37356	1.61641	0	116
GO_INTERMEDIATE_FILAMENT_CYTOSKELETON	0.00420168	0.0613588	0.417775	1.61636	1	63
DURAND_STROMA_S_UP	0.00224719	0.0395954	0.375402	1.61619	0	113
GSE6259_CD4_TCELL_VS_CD8_TCELL_UP	0.00218341	0.0395954	0.381328	1.61518	0	101
MORF_PTPN11	0.00215983	0.0395954	0.37742	1.61491	0	104
GSE24634_IL4_VS_CTRL_TREATED_NAIVE_CD4_TCELL_DAY7_DN	0.00232558	0.0395954	0.364054	1.61476	0	140
GSE21670_STAT3_KO_VS_WT_CD4_TCELL_TGFB_IL6_TREATED_DN	0.00235849	0.0395954	0.360498	1.61451	0	150
GO_CELLULAR_EXTRAVASATION	0.0265306	0.148285	0.553126	1.61439	12	19
MCBRYAN_PUBERTAL_BREAST_6_7WK_UP	0.00232558	0.0395954	0.363961	1.61435	0	140
GO_RESPONSE_TO_STEROID_HORMONE	0.00442478	0.0613588	0.334265	1.61423	1	255
MANTOVANI_VIRAL_GPCR_SIGNALING_UP	0.00813008	0.0827548	0.453696	1.61358	3	41
GO_TRNA_METABOLIC_PROCESS	0.00235849	0.0395954	0.360228	1.6133	0	150
GO_L_ALPHA_AMINO_ACID_TRANSMEMBRANE_TRANSPORT	0.0219124	0.132315	0.592472	1.61303	10	15
GO_REGULATION_OF_TYPE_I_INTERFERON_MEDIATED_SIGNALING_PATHWAY	0.0244898	0.142096	0.52292	1.61293	11	23
GO_NEGATIVE_REGULATION_OF_CELL_ADHESION	0.00223214	0.0395954	0.374429	1.61229	0	115
GO_UROGENITAL_SYSTEM_DEVELOPMENT	0.00221239	0.0395954	0.372465	1.61167	0	116
GSE5542_UNTREATED_VS_IFNG_TREATED_EPITHELIAL_CELLS_6H_UP	0.00221729	0.0395954	0.370705	1.61156	0	120
YAN_ESCAPE_FROM_ANOIKIS	0.0219124	0.132315	0.591906	1.61149	10	15
GSE13522_WT_VS_IFNAR_KO_SKING_T_CRUZI_Y_STRAIN_INF_UP	0.00222717	0.0395954	0.369564	1.61125	0	121
GO_POSITIVE_REGULATION_OF_TYPE_I_INTERFERON_PRODUCTION	0.00211864	0.0395954	0.408309	1.61097	0	67
GENTLES_LEUKEMIC_STEM_CELL_UP	0.020284	0.126716	0.581387	1.61066	9	16
GO_REGULATION_OF_CHOLESTEROL_TRANSPORT	0.0244898	0.142096	0.52206	1.61028	11	23
GO_REGULATION_OF_STEROL_TRANSPORT	0.0244898	0.142096	0.52206	1.61028	11	23
MEK_UP.V1_UP	0.00217391	0.0395954	0.377486	1.60962	0	105
REACTOME_CELL_SURFACE_INTERACTIONS_AT_THE_VASCULAR_WALL	0.00817996	0.0829469	0.42183	1.60956	3	58
GSE6674_UNSTIM_VS_ANTI_IGM_STIM_BCELL_DN	0.0242915	0.141815	0.52562	1.60953	11	22
GSE40273_XBP1_KO_VS_WT_TREG_DN	0.00229885	0.0395954	0.359678	1.60944	0	144
GSE22103_UNSTIM_VS_LPS_STIM_NEUTROPHIL_UP	0.00234742	0.0395954	0.353803	1.60937	0	166
GO_CELL_RECOGNITION	0.0122449	0.096794	0.453523	1.60903	5	40
GSE32901_NAIVE_VS_TH17_NEG_CD4_TCELL_UP	0.00230415	0.0395954	0.359449	1.60854	0	147
GSE41867_LCMV_ARMSTRONG_VS_CLONE13_DAY6_EFFECTOR_CD8_TCELL_DN	0.00239808	0.0395954	0.353313	1.60802	0	170
GSE36476_CTRL_VS_TSST_ACT_16H_MEMORY_CD4_TCELL_YOUNG_DN	0.0023753	0.0395954	0.356953	1.60781	0	158
GO_RAN_GTPASE_BINDING	0.0231579	0.137478	0.505896	1.60741	10	28
GNF2_RBBP6	0.00211864	0.0395954	0.407373	1.60728	0	67
GO_POSITIVE_REGULATION_OF_CHEMOKINE_PRODUCTION	0.0128755	0.100297	0.493359	1.60694	5	31
COATES_MACROPHAGE_M1_VS_M2_UP	0.00414079	0.0613588	0.416562	1.60679	1	62
SANSOM_APC_TARGETS_REQUIRE_MYC	0.002331	0.0395954	0.357336	1.60654	0	155
MODULE_436	0.00217391	0.0395954	0.40938	1.6061	0	68
GSE10325_LUPUS_BCELL_VS_LUPUS_MYELOID_DN	0.0023753	0.0395954	0.353358	1.60599	0	167
GO_TRANSITION_METAL_ION_HOMEOSTASIS	0.00220751	0.0395954	0.410126	1.60598	0	69
TAKEDA_TARGETS_OF_NUP98_HOXA9_FUSION_10D_DN	0.00211864	0.0395954	0.395401	1.60584	0	78
NRL_DN.V1_UP	0.00412371	0.0613588	0.415807	1.6043	1	61
GSE13306_TREG_VS_TCONV_SPLEEN_UP	0.00213675	0.0395954	0.379512	1.60372	0	96
GSE2706_UNSTIM_VS_8H_LPS_AND_R848_DC_DN	0.0044843	0.0613588	0.364348	1.6023	1	128
BURTON_ADIPOGENESIS_PEAK_AT_0HR	0.0142857	0.104697	0.451473	1.60175	6	40
HAHTOLA_MYCOSIS_FUNGOIDES_CD4_DN	0.00218818	0.0395954	0.374916	1.60165	0	106
GSE14350_IL2RB_KO_VS_WT_TEFF_DN	0.00449438	0.0613588	0.361017	1.60163	1	134
GSE4748_CTRL_VS_CYANOBACTERIUM_LPSLIKE_STIM_DC_3H_DN	0.00239808	0.0395954	0.351879	1.60149	0	170
V$GATA_C	0.00217391	0.0395954	0.375516	1.60122	0	105
GSE6259_DEC205_POS_DC_VS_CD8_TCELL_DN	0.00208768	0.0395954	0.38403	1.60089	0	86
GSE27786_NKTCELL_VS_MONO_MAC_UP	0.00238095	0.0395954	0.35311	1.60073	0	164
GSE2405_HEAT_KILLED_LYSATE_VS_LIVE_A_PHAGOCYTOPHILUM_STIM_NEUTROPHIL_24H_UP	0.00659341	0.075309	0.359766	1.60063	2	131
JOHANSSON_BRAIN_CANCER_EARLY_VS_LATE_DN	0.0128205	0.099985	0.482753	1.60036	5	33
V$HNF4_01	0.00231481	0.0395954	0.358268	1.60018	0	143
KEGG_HYPERTROPHIC_CARDIOMYOPATHY_HCM	0.00833333	0.0836147	0.450946	1.5999	3	42
CHICAS_RB1_TARGETS_SENESCENT	0.00234742	0.0395954	0.319606	1.59986	0	368
GO_REGULATION_OF_HUMORAL_IMMUNE_RESPONSE	0.0280561	0.153163	0.557748	1.59979	13	18
GSE4142_PLASMA_CELL_VS_GC_BCELL_DN	0.00453515	0.0613588	0.360675	1.59969	1	135
MORF_HDAC2	0.00453515	0.0613588	0.331635	1.59962	1	261
GSE5589_IL6_KO_VS_IL10_KO_LPS_AND_IL10_STIM_MACROPHAGE_45MIN_DN	0.00232019	0.0395954	0.355429	1.59951	0	152
GSE18281_CORTICAL_VS_MEDULLARY_THYMOCYTE_UP	0.00235849	0.0395954	0.357104	1.59931	0	150
GSE4984_UNTREATED_VS_GALECTIN1_TREATED_DC_DN	0.00218818	0.0395954	0.37432	1.59911	0	106
GSE42021_TREG_PLN_VS_CD24INT_TREG_THYMUS_UP	0.00235849	0.0395954	0.349784	1.59909	0	171
GSE3565_DUSP1_VS_WT_SPLENOCYTES_DN	0.00230415	0.0395954	0.357322	1.59902	0	147
GO_REGULATION_OF_LEUKOCYTE_CHEMOTAXIS	0.00821355	0.0830985	0.421255	1.5989	3	56
GO_CELL_ACTIVATION_INVOLVED_IN_IMMUNE_RESPONSE	0.00428266	0.0613588	0.380654	1.59872	1	92
REACTOME_CYTOKINE_SIGNALING_IN_IMMUNE_SYSTEM	0.00230947	0.0395954	0.34363	1.59774	0	197
BILANGES_RAPAMYCIN_SENSITIVE_VIA_TSC1_AND_TSC2	0.00618557	0.0740204	0.413974	1.59723	2	61
GO_REGULATION_OF_TYPE_I_INTERFERON_PRODUCTION	0.00218341	0.0395954	0.377051	1.59707	0	101
GNF2_MLH1	0.0142857	0.104697	0.450026	1.59662	6	40
GO_NEGATIVE_REGULATION_OF_LEUKOCYTE_MEDIATED_IMMUNITY	0.0182186	0.119918	0.507041	1.59589	8	25
BOWIE_RESPONSE_TO_TAMOXIFEN	0.0258964	0.147261	0.586177	1.59589	12	15
GO_SMALL_NUCLEOLAR_RIBONUCLEOPROTEIN_COMPLEX	0.0280561	0.153163	0.556273	1.59555	13	18
GO_ORGANIC_ACID_TRANSMEMBRANE_TRANSPORT	0.0102041	0.0892607	0.437873	1.59526	4	47
HENDRICKS_SMARCA4_TARGETS_UP	0.01875	0.120975	0.463025	1.59515	8	36
GSE19888_ADENOSINE_A3R_INH_VS_TCELL_MEMBRANES_ACT_MAST_CELL_UP	0.00229358	0.0395954	0.359714	1.594	0	136
GSE10325_CD4_TCELL_VS_BCELL_UP	0.00226244	0.0395954	0.365471	1.59384	0	122
GSE21927_SPLEEN_C57BL6_VS_4T1_TUMOR_BALBC_MONOCYTES_DN	0.00232558	0.0395954	0.354513	1.5938	0	153
GO_APOPTOTIC_CELL_CLEARANCE	0.0264766	0.148285	0.538518	1.59368	12	20
GSE360_T_GONDII_VS_M_TUBERCULOSIS_DC_DN	0.00443459	0.0613588	0.366558	1.59353	1	120
GO_REGULATION_OF_CYTOSOLIC_CALCIUM_ION_CONCENTRATION	0.00211864	0.0395954	0.392279	1.59316	0	78
GO_RESPONSE_TO_EXTRACELLULAR_STIMULUS	0.00442478	0.0613588	0.329891	1.5931	1	255
V$PAX4_03	0.00444444	0.0613588	0.359012	1.59287	1	133
GSE22886_UNSTIM_VS_STIM_MEMORY_TCELL_DN	0.00236967	0.0395954	0.346355	1.59272	0	182
GSE22611_UNSTIM_VS_6H_MDP_STIM_NOD2_TRANSDUCED_HEK293T_CELL_DN	0.00449438	0.0613588	0.358981	1.59259	1	134
GSE411_WT_VS_SOCS3_KO_MACROPHAGE_IL6_STIM_400MIN_UP	0.00232558	0.0395954	0.359034	1.5925	0	140
GO_RIBONUCLEOPROTEIN_COMPLEX_SUBUNIT_ORGANIZATION	0.00239808	0.0395954	0.349851	1.59226	0	170
GO_REGULATION_OF_OXIDATIVE_STRESS_INDUCED_INTRINSIC_APOPTOTIC_SIGNALING_PATHWAY	0.026	0.147539	0.528407	1.59186	12	21
GO_MYELOID_CELL_HOMEOSTASIS	0.00217391	0.0395954	0.405733	1.59179	0	68
GSE27786_BCELL_VS_MONO_MAC_UP	0.00234742	0.0395954	0.349847	1.59138	0	166
GSE7509_DC_VS_MONOCYTE_UP	0.00238095	0.0395954	0.349273	1.59053	0	169
GSE2405_0H_VS_24H_A_PHAGOCYTOPHILUM_STIM_NEUTROPHIL_DN	0.00220264	0.0395954	0.371888	1.59041	0	108
GO_NEGATIVE_REGULATION_OF_TELOMERE_MAINTENANCE	0.0182186	0.119918	0.505217	1.59015	8	25
GO_RNA_SECONDARY_STRUCTURE_UNWINDING	0.014553	0.105557	0.466479	1.58988	6	35
GSE37534_UNTREATED_VS_PIOGLITAZONE_TREATED_CD4_TCELL_PPARG1_AND_FOXP3_TRASDUCED_DN	0.002331	0.0395954	0.353625	1.58985	0	155
GSE22589_HEALTHY_VS_HIV_INFECTED_DC_UP	0.00239808	0.0395954	0.349202	1.58931	0	170
ZHAN_MULTIPLE_MYELOMA_MF_UP	0.02079	0.128186	0.505427	1.58887	9	26
MORF_RPA1	0.00816327	0.0828404	0.416126	1.58859	3	59
GO_RIBONUCLEOPROTEIN_COMPLEX_BIOGENESIS	0.00236407	0.0395954	0.315026	1.5885	0	396
GO_POSITIVE_REGULATION_OF_NF_KAPPAB_IMPORT_INTO_NUCLEUS	0.0243902	0.141958	0.565097	1.58786	11	17
GSE4984_GALECTIN1_VS_LPS_STIM_DC_DN	0.00221239	0.0395954	0.366946	1.58779	0	116
MULLIGHAN_NPM1_MUTATED_SIGNATURE_2_DN	0.00607287	0.0737736	0.419711	1.58766	2	54
GO_REGULATION_OF_NF_KAPPAB_IMPORT_INTO_NUCLEUS	0.0193966	0.123538	0.482706	1.58753	8	32
VART_KSHV_INFECTION_ANGIOGENIC_MARKERS_UP	0.00217391	0.0395954	0.404574	1.58724	0	68
GSE37533_UNTREATED_VS_PIOGLIZATONE_TREATED_CD4_TCELL_FOXP3_TRASDUCED_CD4_TCELL_UP	0.00434783	0.0613588	0.379512	1.58721	1	94
GSE45365_HEALTHY_VS_MCMV_INFECTION_CD8A_DC_IFNAR_KO_DN	0.00232558	0.0395954	0.352898	1.58654	0	153
GSE21033_CTRL_VS_POLYIC_STIM_DC_6H_UP	0.00443459	0.0613588	0.360603	1.58651	1	126
ACOSTA_PROLIFERATION_INDEPENDENT_MYC_TARGETS_UP	0.00618557	0.0740204	0.411175	1.58643	2	61
GSE2128_C57BL6_VS_NOD_THYMOCYTE_MIMETOPE_NEGATIVE_SELECTION_DN	0.00239234	0.0395954	0.353088	1.58632	0	157
GSE13484_UNSTIM_VS_YF17D_VACCINE_STIM_PBMC_DN	0.00444444	0.0613588	0.357485	1.58609	1	133
GO_RESPONSE_TO_OXYGEN_LEVELS	0.00230947	0.0395954	0.341988	1.58604	0	189
GSE21063_CTRL_VS_ANTI_IGM_STIM_BCELL_NFATC1_KO_16H_UP	0.00445434	0.0613588	0.36585	1.58535	1	119
GO_HOMEOSTASIS_OF_NUMBER_OF_CELLS	0.00659341	0.075309	0.356308	1.58525	2	131
WANG_TUMOR_INVASIVENESS_UP	0.00229358	0.0395954	0.321109	1.58442	0	323
GSE36392_TYPE_2_MYELOID_VS_NEUTROPHIL_IL25_TREATED_LUNG_DN	0.00238095	0.0395954	0.347826	1.58394	0	169
GSE45365_WT_VS_IFNAR_KO_CD11B_DC_UP	0.00445434	0.0613588	0.3654	1.5834	1	119
GO_RESPONSE_TO_CARBOHYDRATE	0.00431034	0.0613588	0.376278	1.58316	1	95
GSE2585_CD80_HIGH_VS_LOW_AIRE_KO_MTEC_UP	0.00217865	0.0395954	0.374856	1.58301	0	99
GO_PHOSPHATIDYLSERINE_BINDING	0.0243408	0.141917	0.571256	1.58259	11	16
GSE40274_CTRL_VS_EOS_TRANSDUCED_ACTIVATED_CD4_TCELL_DN	0.00431034	0.0613588	0.376137	1.58256	1	95
GSE2706_UNSTIM_VS_2H_LPS_AND_R848_DC_DN	0.00438596	0.0613588	0.356106	1.58227	1	130
GSE19198_6H_VS_24H_IL21_TREATED_TCELL_DN	0.00697674	0.0755821	0.356661	1.58197	2	140
GO_L_AMINO_ACID_TRANSPORT	0.0273684	0.151387	0.497887	1.58196	12	28
GSE1460_INTRATHYMIC_T_PROGENITOR_VS_DP_THYMOCYTE_UP	0.00221239	0.0395954	0.365486	1.58147	0	116
GSE9946_MATURE_STIMULATORY_VS_LISTERIA_INF_MATURE_DC_DN	0.0147059	0.10609	0.456206	1.5809	6	37
JECHLINGER_EPITHELIAL_TO_MESENCHYMAL_TRANSITION_UP	0.0124481	0.0979952	0.451651	1.58077	5	38
DER_IFN_ALPHA_RESPONSE_UP	0.0102249	0.0892681	0.414263	1.58069	4	58
GSE43955_1H_VS_10H_ACT_CD4_TCELL_WITH_TGFB_IL6_DN	0.00458716	0.0613588	0.356619	1.58028	1	136
GO_ERYTHROCYTE_HOMEOSTASIS	0.00821355	0.0830985	0.416216	1.57978	3	56
GSE11924_TH1_VS_TH2_CD4_TCELL_UP	0.00445434	0.0613588	0.360076	1.57935	1	124
GSE21774_CD62L_POS_CD56_BRIGHT_VS_CD62L_NEG_CD56_DIM_NK_CELL_DN	0.00226244	0.0395954	0.362126	1.57925	0	122
GO_HYDROLASE_ACTIVITY_ACTING_ON_CARBON_NITROGEN_BUT_NOT_PEPTIDE_BONDS	0.00429185	0.0613588	0.375912	1.57905	1	93
GSE24634_NAIVE_CD4_TCELL_VS_DAY5_IL4_CONV_TREG_DN	0.00230947	0.0395954	0.340256	1.57801	0	189
GCM_PPP1CC	0.00821355	0.0830985	0.415672	1.57772	3	56
UDAYAKUMAR_MED1_TARGETS_UP	0.0045045	0.0613588	0.366825	1.57756	1	114
GSE7348_LPS_VS_TOLERIZED_AND_LPS_STIM_MACROPHAGE_UP	0.00238095	0.0395954	0.347887	1.57705	0	164
GSE3691_CONVENTIONAL_VS_PLASMACYTOID_DC_SPLEEN_UP	0.00449438	0.0613588	0.355452	1.57694	1	134
GSE3565_CTRL_VS_LPS_INJECTED_SPLENOCYTES_DN	0.00697674	0.0755821	0.355477	1.57672	2	140
GO_B_CELL_ACTIVATION_INVOLVED_IN_IMMUNE_RESPONSE	0.0230608	0.137206	0.490877	1.57622	10	29
GERHOLD_ADIPOGENESIS_UP	0.0144628	0.105245	0.448303	1.57565	6	39
GSE27786_LIN_NEG_VS_MONO_MAC_UP	0.00234742	0.0395954	0.347324	1.5749	0	162
GO_REPRODUCTIVE_SYSTEM_DEVELOPMENT	0.00234192	0.0395954	0.338892	1.57422	0	196
GO_T_CELL_DIFFERENTIATION_INVOLVED_IN_IMMUNE_RESPONSE	0.0346232	0.17357	0.531902	1.5741	16	20
GSE11961_MARGINAL_ZONE_BCELL_VS_MEMORY_BCELL_DAY40_UP	0.00659341	0.075309	0.353802	1.5741	2	131
MODULE_257	0.00443459	0.0613588	0.361904	1.5733	1	120
GSE10325_MYELOID_VS_LUPUS_MYELOID_DN	0.00236967	0.0395954	0.348755	1.57292	0	159
MODULE_265	0.0304878	0.160985	0.55958	1.57235	14	17
DANG_MYC_TARGETS_DN	0.02079	0.128186	0.500153	1.57229	9	26
GO_REGULATION_OF_ATP_METABOLIC_PROCESS	0.014553	0.105557	0.461238	1.57202	6	35
GO_REGULATION_OF_NUCLEOSIDE_METABOLIC_PROCESS	0.014553	0.105557	0.461238	1.57202	6	35
BRACHAT_RESPONSE_TO_CAMPTOTHECIN_UP	0.0320641	0.1664	0.547963	1.57172	15	18
GSE37532_WT_VS_PPARG_KO_LN_TREG_DN	0.0263692	0.148151	0.567258	1.57152	12	16
ONDER_CDH1_TARGETS_2_UP	0.00224719	0.0395954	0.365014	1.57146	0	113
GSE40666_WT_VS_STAT4_KO_CD8_TCELL_WITH_IFNA_STIM_90MIN_DN	0.00232558	0.0395954	0.349376	1.57071	0	153
SARTIPY_NORMAL_AT_INSULIN_RESISTANCE_UP	0.0193966	0.123538	0.488375	1.57055	8	30
MODULE_321	0.00210526	0.0395954	0.381163	1.57048	0	82
MORF_HAT1	0.00238095	0.0395954	0.346397	1.57029	0	164
GSE18791_UNSTIM_VS_NEWCATSLE_VIRUS_DC_6H_DN	0.00445434	0.0613588	0.357959	1.57006	1	124
EBAUER_MYOGENIC_TARGETS_OF_PAX3_FOXO1_FUSION	0.0340681	0.172795	0.547294	1.5698	16	18
GO_LYMPHOCYTE_DIFFERENTIATION	0.00444444	0.0613588	0.35379	1.5697	1	133
GSE24972_MARGINAL_ZONE_BCELL_VS_FOLLICULAR_BCELL_UP	0.00445434	0.0613588	0.362065	1.56895	1	119
REACTOME_AMINO_ACID_TRANSPORT_ACROSS_THE_PLASMA_MEMBRANE	0.0304878	0.160985	0.558231	1.56856	14	17
GSE7509_UNSTIM_VS_TNFA_IL1B_IL6_PGE_STIM_DC_UP	0.00238095	0.0395954	0.345922	1.56814	0	164
MODULE_259	0.0346939	0.173859	0.537276	1.56813	16	19
GSE3039_CD4_TCELL_VS_B1_BCELL_DN	0.00659341	0.075309	0.352458	1.56812	2	131
GSE3720_VD1_VS_VD2_GAMMADELTA_TCELL_WITH_PMA_STIM_UP	0.0045977	0.0613588	0.350415	1.56799	1	144
GSE3337_CTRL_VS_16H_IFNG_IN_CD8POS_DC_UP	0.00230947	0.0395954	0.348384	1.56717	0	151
CYCLIN_D1_KE_.V1_DN	0.00214592	0.0395954	0.376773	1.56686	0	88
GSE7509_FCGRIIB_VS_TNFA_IL1B_IL6_PGE_STIM_DC_DN	0.00210084	0.0395954	0.382891	1.5668	0	79
LIM_MAMMARY_LUMINAL_MATURE_DN	0.0104384	0.0904234	0.429339	1.56643	4	48
GROSS_ELK3_TARGETS_UP	0.0263692	0.148151	0.5652	1.56582	12	16
GSE36826_NORMAL_VS_STAPH_AUREUS_INF_SKIN_DN	0.004662	0.0613588	0.348263	1.56574	1	155
ACACTGG,MIR-199A,MIR-199B	0.00652174	0.0750028	0.370401	1.56569	2	98
GSE21546_UNSTIM_VS_ANTI_CD3_STIM_ELK1_KO_DP_THYMOCYTES_UP	0.00430108	0.0613588	0.37412	1.56551	1	90
GSE21546_UNSTIM_VS_ANTI_CD3_STIM_SAP1A_KO_AND_ELK1_KO_DP_THYMOCYTES_UP	0.0021097	0.0395954	0.38211	1.56548	0	81
GSE6269_HEALTHY_VS_STAPH_AUREUS_INF_PBMC_UP	0.00659341	0.075309	0.351812	1.56525	2	131
PATTERSON_DOCETAXEL_RESISTANCE	0.0304878	0.160985	0.556918	1.56487	14	17
GO_PROTEIN_EXPORT_FROM_NUCLEUS	0.0214133	0.130361	0.498068	1.56468	9	27
NUMATA_CSF3_SIGNALING_VIA_STAT3	0.0298805	0.159669	0.574705	1.56466	14	15
GSE9509_LPS_VS_LPS_AND_IL10_STIM_IL10_KO_MACROPHAGE_20MIN_UP	0.00422833	0.0613588	0.376228	1.56463	1	87
GO_CELLULAR_AMINO_ACID_METABOLIC_PROCESS	0.00225734	0.0395954	0.332215	1.56439	0	221
SANA_TNF_SIGNALING_UP	0.00804829	0.0826773	0.413605	1.56396	3	53
MORF_EIF4E	0.00210084	0.0395954	0.387578	1.56387	0	76
GAUSSMANN_MLL_AF4_FUSION_TARGETS_D_UP	0.0263692	0.148151	0.564452	1.56374	12	16
GO_RNA_DEPENDENT_DNA_BIOSYNTHETIC_PROCESS	0.0367347	0.179841	0.53565	1.56338	17	19
GO_POSITIVE_REGULATION_OF_CHEMOTAXIS	0.00636943	0.0748712	0.401325	1.56333	2	65
EINAV_INTERFERON_SIGNATURE_IN_CANCER	0.0364372	0.179304	0.510429	1.56301	17	22
GTGGGTGK_UNKNOWN	0.00694444	0.0755821	0.349842	1.56255	2	143
GO_CELLULAR_RESPONSE_TO_INTERLEUKIN_6	0.0318725	0.165616	0.573826	1.56227	15	15
GO_RESPONSE_TO_INTERLEUKIN_6	0.0318725	0.165616	0.573826	1.56227	15	15
GO_POSITIVE_REGULATION_OF_PROTEIN_IMPORT	0.00221729	0.0395954	0.397787	1.5618	0	70
GO_NEGATIVE_REGULATION_OF_PROTEIN_SERINE_THREONINE_KINASE_ACTIVITY	0.00429185	0.0613588	0.372514	1.56143	1	91
GSE21670_TGFB_VS_IL6_TREATED_CD4_TCELL_UP	0.00618557	0.0740204	0.404658	1.56129	2	61
GSE30971_CTRL_VS_LPS_STIM_MACROPHAGE_WBP7_HET_2H_DN	0.00230947	0.0395954	0.347063	1.56122	0	151
TONKS_TARGETS_OF_RUNX1_RUNX1T1_FUSION_GRANULOCYTE_UP	0.0215517	0.130668	0.474704	1.56121	9	32
GSE45739_NRAS_KO_VS_WT_UNSTIM_CD4_TCELL_UP	0.004662	0.0613588	0.347242	1.56116	1	155
WALLACE_PROSTATE_CANCER_RACE_UP	0.0023753	0.0395954	0.344582	1.56072	0	163
MODULE_332	0.0142857	0.104697	0.43984	1.56048	6	40
AMIT_EGF_RESPONSE_120_MCF10A	0.0215517	0.130668	0.48519	1.56031	9	30
GO_RESPONSE_TO_ESTROGEN	0.00215983	0.0395954	0.364624	1.56016	0	104
GSE17721_CTRL_VS_PAM3CSK4_1H_BMDC_DN	0.00224719	0.0395954	0.362178	1.55925	0	113
GSE6259_DEC205_POS_DC_VS_BCELL_DN	0.00234192	0.0395954	0.347864	1.55902	0	149
GSE35685_CD34POS_CD10NEG_CD62LPOS_VS_CD34POS_CD10POS_BONE_MARROW_DN	0.0023753	0.0395954	0.344187	1.55893	0	163
GO_POSITIVE_REGULATION_OF_SMALL_GTPASE_MEDIATED_SIGNAL_TRANSDUCTION	0.0340681	0.172795	0.543451	1.55878	16	18
GO_SH2_DOMAIN_BINDING	0.0318725	0.165616	0.572488	1.55862	15	15
MORF_EI24	0.00688073	0.0755821	0.351642	1.55823	2	136
PIGF_UP.V1_UP	0.00688073	0.0755821	0.350581	1.55783	2	139
GO_REGULATION_OF_LIPID_TRANSPORT	0.00804829	0.0826773	0.411978	1.55781	3	53
GSE23505_IL6_IL1_IL23_VS_IL6_IL1_TGFB_TREATED_CD4_TCELL_UP	0.00688073	0.0755821	0.351545	1.5578	2	136
BOSCO_TH1_CYTOTOXIC_MODULE	0.0101215	0.0888867	0.418666	1.55744	4	51
GSE25085_FETAL_BM_VS_ADULT_BM_SP4_THYMIC_IMPLANT_UP	0.00234742	0.0395954	0.342286	1.55698	0	166
GSE45365_BCELL_VS_CD8_TCELL_DN	0.00630252	0.0743606	0.402407	1.5569	2	63
MORI_LARGE_PRE_BII_LYMPHOCYTE_DN	0.0104384	0.0904234	0.426614	1.55649	4	48
GSE5589_LPS_VS_LPS_AND_IL10_STIM_MACROPHAGE_180MIN_DN	0.00456621	0.0613588	0.350391	1.55649	1	137
GAURNIER_PSMD4_TARGETS	0.0237069	0.139621	0.473142	1.55608	10	32
GO_PEPTIDYL_PROLINE_MODIFICATION	0.0231092	0.137311	0.44887	1.55548	10	37
JOHANSSON_GLIOMAGENESIS_BY_PDGFB_UP	0.0100604	0.0886996	0.422012	1.55539	4	49
GSE360_L_DONOVANI_VS_M_TUBERCULOSIS_DC_DN	0.00688073	0.0755821	0.350015	1.55532	2	139
GSE36527_CD62L_HIGH_VS_CD62L_LOW_TREG_CD69_NEG_KLRG1_NEG_UP	0.00478469	0.0614158	0.346137	1.55509	1	157
BACOLOD_RESISTANCE_TO_ALKYLATING_AGENTS_DN	0.0125	0.09823	0.438276	1.55495	5	42
GSE3565_CTRL_VS_LPS_INJECTED_DUSP1_KO_SPLENOCYTES_DN	0.00458716	0.0613588	0.349963	1.55454	1	138
GSE12845_IGD_POS_VS_NEG_BLOOD_BCELL_DN	0.004662	0.0613588	0.345761	1.5545	1	155
MOREAUX_B_LYMPHOCYTE_MATURATION_BY_TACI_DN	0.00824742	0.0833152	0.402694	1.55371	3	61
GO_CD4_POSITIVE_ALPHA_BETA_T_CELL_ACTIVATION	0.0364372	0.179304	0.507248	1.55327	17	22
GO_CELLULAR_RESPONSE_TO_INTERFERON_GAMMA	0.00804829	0.0826773	0.410723	1.55307	3	53
GSE30971_WBP7_HET_VS_KO_MACROPHAGE_4H_LPS_STIM_DN	0.00674157	0.0755426	0.350045	1.55295	2	134
GSE7218_IGM_VS_IGG_SIGNAL_THGOUGH_ANTIGEN_BCELL_DN	0.00220751	0.0395954	0.361305	1.55257	0	110
REACTOME_PROTEIN_FOLDING	0.0102041	0.0892607	0.426085	1.55232	4	47
GSE22229_RENAL_TRANSPLANT_VS_HEALTHY_PBMC_DN	0.00904977	0.0838159	0.355861	1.55193	3	122
GSE36888_STAT5_AB_KNOCKIN_VS_WT_TCELL_IL2_TREATED_2H_UP	0.00694444	0.0755821	0.347357	1.55144	2	143
GO_NUCLEAR_LOCALIZATION_SEQUENCE_BINDING	0.0340681	0.172795	0.540668	1.5508	16	18
MORF_RRM1	0.00652174	0.0750028	0.366851	1.55069	2	98
GSE21360_PRIMARY_VS_TERTIARY_MEMORY_CD8_TCELL_DN	0.00464037	0.0613588	0.34449	1.55028	1	152
JIANG_HYPOXIA_NORMAL	0.00454545	0.0613588	0.325453	1.54989	1	235
GO_REGULATION_OF_RESPONSE_TO_OXIDATIVE_STRESS	0.0142857	0.104697	0.436775	1.54961	6	40
chr12q14	0.0367347	0.179841	0.502326	1.54941	17	23
AFFAR_YY1_TARGETS_UP	0.0043573	0.0613588	0.366895	1.54938	1	99
GSE8835_CD4_VS_CD8_TCELL_CLL_PATIENT_UP	0.00896861	0.0837676	0.352305	1.54934	3	128
GSE37301_COMMON_LYMPHOID_PROGENITOR_VS_CD4_TCELL_UP	0.00458716	0.0613588	0.348732	1.54907	1	138
GO_CARDIAC_MUSCLE_TISSUE_DEVELOPMENT	0.0121951	0.0967685	0.401766	1.5488	5	60
KRIEG_HYPOXIA_VIA_KDM3A	0.0189474	0.121492	0.460997	1.54878	8	34
FERNANDEZ_BOUND_BY_MYC	0.00456621	0.0613588	0.348599	1.54853	1	137
VANHARANTA_UTERINE_FIBROID_UP	0.0340681	0.172795	0.539822	1.54837	16	18
GO_PROTEIN_IMPORT	0.00665188	0.0755426	0.35192	1.54831	2	126
GO_PROTEIN_FOLDING	0.00238095	0.0395954	0.339955	1.5481	0	169
COULOUARN_TEMPORAL_TGFB1_SIGNATURE_UP	0.00421941	0.0613588	0.377866	1.54809	1	81
BAUS_TFF2_TARGETS_UP	0.0384615	0.184315	0.505474	1.54784	18	22
BENPORATH_ES_1	0.00451467	0.0613588	0.322471	1.5473	1	244
PID_INTEGRIN_CS_PATHWAY	0.0386965	0.18511	0.522749	1.54702	18	20
MODULE_199	0.0404858	0.189137	0.505051	1.54654	19	22
GO_RIBOSOME_ASSEMBLY	0.0146138	0.105883	0.423824	1.54631	6	48
GSE19941_LPS_VS_LPS_AND_IL10_STIM_IL10_KO_NFKBP50_KO_MACROPHAGE_DN	0.00907029	0.0838159	0.348435	1.5454	3	135
GO_CELL_ACTIVATION	0.00238095	0.0395954	0.309409	1.54525	0	365
GSE40666_NAIVE_VS_EFFECTOR_CD8_TCELL_UP	0.00896861	0.0837676	0.353681	1.54523	3	123
GSE19941_UNSTIM_VS_LPS_STIM_IL10_KO_MACROPHAGE_UP	0.00641026	0.0748712	0.36565	1.54514	2	96
TGANNYRGCA_V$TCF11MAFG_01	0.00239808	0.0395954	0.339495	1.54513	0	170
GO_PHOSPHOLIPASE_ACTIVITY	0.0121951	0.0967685	0.434364	1.54483	5	41
GOLDRATH_HOMEOSTATIC_PROLIFERATION	0.00456621	0.0613588	0.34518	1.54456	1	146
KEGG_PPAR_SIGNALING_PATHWAY	0.0229167	0.136644	0.448322	1.5445	10	36
GSE13485_DAY3_VS_DAY7_YF17D_VACCINE_PBMC_DN	0.00668151	0.0755426	0.352082	1.54429	2	124
chr1p33	0.0325203	0.16755	0.549585	1.54427	15	17
PID_PRL_SIGNALING_EVENTS_PATHWAY	0.0386965	0.18511	0.521679	1.54385	18	20
GO_OSSIFICATION	0.00884956	0.0837676	0.349377	1.54364	3	129
MATSUDA_NATURAL_KILLER_DIFFERENTIATION	0.00229358	0.0395954	0.310167	1.54349	0	337
GSE18791_CTRL_VS_NEWCASTLE_VIRUS_DC_16H_DN	0.00218341	0.0395954	0.359156	1.54317	0	109
GO_LEUKOCYTE_CELL_CELL_ADHESION	0.002331	0.0395954	0.339259	1.54233	0	165
GSE44649_WT_VS_MIR155_KO_NAIVE_CD8_TCELL_DN	0.00888889	0.0837676	0.347582	1.54215	3	133
GO_RESPONSE_TO_VITAMIN	0.00809717	0.0827548	0.407664	1.54209	3	54
GSE16522_MEMORY_VS_NAIVE_ANTI_CD3CD28_STIM_CD8_TCELL_DN	0.00925926	0.0840099	0.345105	1.54139	3	143
GSE17721_0.5H_VS_24H_CPG_BMDC_UP	0.002331	0.0395954	0.338946	1.54091	0	165
PICCALUGA_ANGIOIMMUNOBLASTIC_LYMPHOMA_UP	0.00652174	0.0750028	0.368338	1.54048	2	94
GSE36476_YOUNG_VS_OLD_DONOR_MEMORY_CD4_TCELL_72H_TSST_ACT_UP	0.00420168	0.0613588	0.381768	1.54042	1	76
GO_HISTONE_METHYLTRANSFERASE_ACTIVITY	0.018595	0.120608	0.438257	1.54035	8	39
GSE25123_CTRL_VS_IL4_STIM_PPARG_KO_MACROPHAGE_DN	0.00434783	0.0613588	0.361225	1.54028	1	105
GSE18281_MEDULLARY_THYMOCYTE_VS_WHOLE_MEDULLA_THYMUS_DN	0.00896861	0.0837676	0.352441	1.53981	3	123
GSE19401_NAIVE_VS_IMMUNIZED_MOUSE_PLN_FOLLICULAR_DC_UP	0.002331	0.0395954	0.338699	1.53978	0	165
LOPEZ_TRANSLATION_VIA_FN1_SIGNALING	0.0294737	0.158317	0.484549	1.53958	13	28
GO_REGULATION_OF_RESPONSE_TO_INTERFERON_GAMMA	0.0408163	0.189819	0.527442	1.53943	19	19
YANG_BREAST_CANCER_ESR1_BULK_DN	0.0378486	0.182489	0.565412	1.53936	18	15
SMIRNOV_RESPONSE_TO_IR_6HR_UP	0.00215983	0.0395954	0.359685	1.53902	0	104
GO_TERPENOID_METABOLIC_PROCESS	0.0273109	0.151194	0.444058	1.5388	12	37
GSE40274_CTRL_VS_FOXP3_AND_EOS_TRANSDUCED_ACTIVATED_CD4_TCELL_DN	0.00221729	0.0395954	0.359847	1.5379	0	107
GSE30962_ACUTE_VS_CHRONIC_LCMV_PRIMARY_INF_CD8_TCELL_DN	0.00473934	0.0613588	0.340812	1.5371	1	159
TIAN_TNF_SIGNALING_VIA_NFKB	0.0425101	0.19485	0.501914	1.53694	20	22
GENTILE_UV_LOW_DOSE_UP	0.044	0.199289	0.510138	1.53682	21	21
FRIDMAN_IMMORTALIZATION_DN	0.0408163	0.189819	0.526548	1.53681	19	19
GSE19888_ADENOSINE_A3R_INH_VS_ACT_WITH_INHIBITOR_PRETREATMENT_IN_MAST_CELL_UP	0.00220264	0.0395954	0.359326	1.53669	0	108
GO_POSITIVE_REGULATION_OF_LYMPHOCYTE_MIGRATION	0.0408163	0.189819	0.526476	1.53661	19	19
GO_COP9_SIGNALOSOME	0.0278373	0.152619	0.488738	1.53537	12	27
GO_REGULATION_OF_FIBROBLAST_PROLIFERATION	0.0102669	0.0895178	0.404467	1.53519	4	56
GO_LEUKOCYTE_MEDIATED_IMMUNITY	0.00645161	0.0748712	0.366867	1.53516	2	90
GSE14415_INDUCED_TREG_VS_FOXP3_KO_INDUCED_TREG_UP	0.00890869	0.0837676	0.352059	1.53493	3	121
BOYLAN_MULTIPLE_MYELOMA_D_UP	0.0100604	0.0886996	0.408574	1.53469	4	52
GO_REGULATION_OF_LYMPHOCYTE_MIGRATION	0.0278373	0.152619	0.488481	1.53456	12	27
GSE24634_TREG_VS_TCONV_POST_DAY5_IL4_CONVERSION_DN	0.00904977	0.0838159	0.343617	1.53425	3	141
GO_POSITIVE_REGULATION_OF_FAT_CELL_DIFFERENTIATION	0.0278373	0.152619	0.488353	1.53416	12	27
GSE22886_NAIVE_TCELL_VS_MONOCYTE_UP	0.00656455	0.075309	0.347862	1.53415	2	127
GSE11864_CSF1_PAM3CYS_VS_CSF1_IFNG_PAM3CYS_IN_MAC_UP	0.00665188	0.0755426	0.348659	1.53396	2	126
GO_REGULATION_OF_FATTY_ACID_METABOLIC_PROCESS	0.00809717	0.0827548	0.405425	1.53363	3	54
GOBERT_CORE_OLIGODENDROCYTE_DIFFERENTIATION	0.0339321	0.172432	0.49129	1.53344	16	24
GSE46468_LUNG_INNATE_LYMPHOID_CELL_VS_SPLEEN_CD4_TCELL_DN	0.0047619	0.0613588	0.336686	1.53321	1	169
GO_MUSCLE_ORGAN_MORPHOGENESIS	0.0387755	0.18524	0.497015	1.53303	18	23
GSE17974_0H_VS_6H_IN_VITRO_ACT_CD4_TCELL_DN	0.00478469	0.0614158	0.341212	1.53297	1	157
HOQUE_METHYLATED_IN_CANCER	0.034413	0.173153	0.487008	1.53284	16	25
APPEL_IMATINIB_RESPONSE	0.0293501	0.157885	0.477127	1.53207	13	29
GO_MRNA_SPLICE_SITE_SELECTION	0.0387755	0.18524	0.496691	1.53203	18	23
GO_POSITIVE_REGULATION_OF_HOMEOSTATIC_PROCESS	0.00896861	0.0837676	0.348323	1.53182	3	128
V$MYCMAX_B	0.00478469	0.0614158	0.340941	1.53175	1	157
GSE19941_LPS_VS_LPS_AND_IL10_STIM_IL10_KO_MACROPHAGE_DN	0.00858369	0.0837676	0.361781	1.53169	3	97
GSE15930_NAIVE_VS_72H_IN_VITRO_STIM_CD8_TCELL_UP	0.00656455	0.075309	0.347279	1.53158	2	127
GO_REGULATION_OF_DNA_DAMAGE_RESPONSE_SIGNAL_TRANSDUCTION_BY_P53_CLASS_MEDIATOR	0.0408163	0.189819	0.524507	1.53086	19	19
NABA_ECM_AFFILIATED	0.00823045	0.0832066	0.401498	1.53046	3	57
MULLIGHAN_NPM1_SIGNATURE_3_DN	0.00858369	0.0837676	0.361412	1.53012	3	97
GO_VASCULAR_PROCESS_IN_CIRCULATORY_SYSTEM	0.0142276	0.104697	0.396887	1.52999	6	60
CROONQUIST_STROMAL_STIMULATION_UP	0.0273109	0.151194	0.441474	1.52985	12	37
GSE28783_CTRL_ANTI_MIR_VS_UNTREATED_ATHEROSCLEROSIS_MACROPHAGE_DN	0.00220751	0.0395954	0.355885	1.52928	0	110
FEVR_CTNNB1_TARGETS_DN	0.00230947	0.0395954	0.299179	1.52919	0	448
GSE17721_LPS_VS_PAM3CSK4_1H_BMDC_DN	0.00917431	0.0838159	0.344189	1.52889	3	138
GSE24634_TREG_VS_TCONV_POST_DAY5_IL4_CONVERSION_UP	0.00234192	0.0395954	0.33284	1.52877	0	177
GO_HELICASE_ACTIVITY	0.00917431	0.0838159	0.344156	1.52875	3	138
GSE17974_IL4_AND_ANTI_IL12_VS_UNTREATED_48H_ACT_CD4_TCELL_DN	0.00417537	0.0613588	0.366636	1.52838	1	86
GSE1448_ANTI_VALPHA2_VS_VBETA5_DP_THYMOCYTE_DN	0.00888889	0.0837676	0.344471	1.52835	3	133
GO_ORGANIC_ACID_TRANSMEMBRANE_TRANSPORTER_ACTIVITY	0.0102041	0.0892607	0.400344	1.52834	4	59
GO_LEUKOCYTE_PROLIFERATION	0.0140845	0.104366	0.412757	1.52826	6	50
GSE8685_IL2_ACT_IL2_STARVED_VS_IL21_ACT_IL2_STARVED_CD4_TCELL_DN	0.00420168	0.0613588	0.373786	1.52814	1	80
GSE22432_CDC_VS_COMMON_DC_PROGENITOR_DN	0.00473934	0.0613588	0.34009	1.52806	1	156
GSE17721_CTRL_VS_PAM3CSK4_6H_BMDC_DN	0.0114943	0.0943137	0.341466	1.52795	4	144
GSE21063_CTRL_VS_ANTI_IGM_STIM_BCELL_8H_UP	0.0043573	0.0613588	0.361815	1.52793	1	99
GO_RRNA_METHYLATION	0.0418327	0.192603	0.56114	1.52772	20	15
GSE29164_CD8_TCELL_VS_CD8_TCELL_AND_IL12_TREATED_MELANOMA_DAY3_DN	0.00475059	0.0613588	0.339091	1.52736	1	158
GO_INTRINSIC_APOPTOTIC_SIGNALING_PATHWAY	0.00873362	0.0837676	0.350557	1.52727	3	118
GSE7459_UNTREATED_VS_IL6_TREATED_ACT_CD4_TCELL_DN	0.00804829	0.0826773	0.403886	1.52721	3	53
GSE10325_LUPUS_CD4_TCELL_VS_LUPUS_MYELOID_UP	0.00886918	0.0837676	0.351233	1.52691	3	120
GO_REGULATION_OF_PROTEIN_IMPORT	0.00671141	0.0755426	0.347808	1.52683	2	125
MORF_RAD23A	0.00462963	0.0613588	0.308135	1.52664	1	331
GO_POSITIVE_REGULATION_OF_LEUKOCYTE_DIFFERENTIATION	0.00631579	0.0743606	0.36948	1.52655	2	83
GSE19888_ADENOSINE_A3R_ACT_VS_TCELL_MEMBRANES_ACT_IN_MAST_CELL_UP	0.00913242	0.0838159	0.343575	1.52621	3	137
GSE19888_ADENOSINE_A3R_ACT_VS_A3R_ACT_WITH_A3R_INH_PRETREATMENT_IN_MAST_CELL_DN	0.00884956	0.0837676	0.345419	1.52615	3	129
GO_COATED_PIT	0.0102041	0.0892607	0.418882	1.52608	4	47
GSE29618_LAIV_VS_TIV_FLU_VACCINE_DAY7_MONOCYTE_UP	0.00898876	0.0838159	0.343986	1.52607	3	134
GSE34179_THPOK_KO_VS_WT_VA14I_NKTCELL_DN	0.00220751	0.0395954	0.355087	1.52585	0	110
GSE36095_WT_VS_HDAC9_KO_TREG_DN	0.0293501	0.157885	0.475102	1.52557	13	29
GO_CELLULAR_RESPONSE_TO_EXTRACELLULAR_STIMULUS	0.00671141	0.0755426	0.34738	1.52495	2	125
REACTOME_PREFOLDIN_MEDIATED_TRANSFER_OF_SUBSTRATE_TO_CCT_TRIC	0.0408163	0.189819	0.494292	1.52463	19	23
THUM_SYSTOLIC_HEART_FAILURE_UP	0.00445434	0.0613588	0.313423	1.52454	1	276
CAATGCA,MIR-33	0.010101	0.0888867	0.401287	1.5242	4	55
GSE10325_CD4_TCELL_VS_LUPUS_CD4_TCELL_DN	0.00896861	0.0837676	0.348738	1.52364	3	123
GSE34515_CD16_NEG_VS_POS_MONOCYTE_UP	0.00904977	0.0838159	0.349351	1.52354	3	122
GO_RESPONSE_TO_ESTRADIOL	0.00649351	0.0750028	0.382022	1.52302	2	73
GSE36009_UNSTIM_VS_LPS_STIM_NLRP10_KO_DC_DN	0.0114943	0.0943137	0.340335	1.52289	4	144
GSE360_T_GONDII_VS_M_TUBERCULOSIS_MAC_DN	0.00671141	0.0755426	0.346748	1.52218	2	125
GO_POSITIVE_REGULATION_OF_LEUKOCYTE_PROLIFERATION	0.00847458	0.0837676	0.37463	1.52149	3	78
CHIARADONNA_NEOPLASTIC_TRANSFORMATION_CDC25_UP	0.00441501	0.0613588	0.388538	1.52144	1	69
LIU_NASOPHARYNGEAL_CARCINOMA	0.0181087	0.119489	0.41075	1.52083	8	50
GSE2770_IL12_AND_TGFB_ACT_VS_ACT_CD4_TCELL_6H_DN	0.007109	0.0755821	0.337152	1.52059	2	159
GO_EMBRYONIC_PLACENTA_DEVELOPMENT	0.018595	0.120608	0.425212	1.51967	8	43
GSE37532_TREG_VS_TCONV_CD4_TCELL_FROM_LN_DN	0.00462963	0.0613588	0.335413	1.51967	1	161
MODULE_33	0.00465116	0.0613588	0.329948	1.51963	1	180
GO_REGENERATION	0.00858369	0.0837676	0.362438	1.51919	3	91
NGO_MALIGNANT_GLIOMA_1P_LOH	0.0345528	0.173525	0.540635	1.51912	16	17
GSE22886_NAIVE_CD4_TCELL_VS_MONOCYTE_UP	0.00437637	0.0613588	0.355596	1.51912	1	106
LABBE_TGFB1_TARGETS_UP	0.01417	0.104652	0.40834	1.51903	6	51
MODULE_2	0.00458716	0.0613588	0.326412	1.51891	1	198
PID_MYC_REPRESS_PATHWAY	0.0120724	0.0965145	0.404346	1.51881	5	52
GO__DE_NOVO_PROTEIN_FOLDING	0.0440882	0.199351	0.529432	1.51857	21	18
GLI1_UP.V1_DN	0.0488798	0.212884	0.513103	1.51847	23	20
GSE23321_EFFECTOR_MEMORY_VS_NAIVE_CD8_TCELL_DN	0.00475059	0.0613588	0.337026	1.51805	1	158
GSE43955_1H_VS_42H_ACT_CD4_TCELL_WITH_TGFB_IL6_DN	0.00896861	0.0837676	0.345105	1.51767	3	128
GO_NEGATIVE_REGULATION_OF_PHOSPHORYLATION	0.00674157	0.0755426	0.311559	1.51763	2	280
GO_PRERIBOSOME_LARGE_SUBUNIT_PRECURSOR	0.0440882	0.199351	0.529106	1.51763	21	18
GSE37301_LYMPHOID_PRIMED_MPP_VS_GRAN_MONO_PROGENITOR_UP	0.007109	0.0755821	0.336453	1.51744	2	159
GSE40274_FOXP3_VS_FOXP3_AND_PBX1_TRANSDUCED_ACTIVATED_CD4_TCELL_DN	0.00896861	0.0837676	0.347281	1.51727	3	123
GO_REGULATION_OF_ACUTE_INFLAMMATORY_RESPONSE	0.0311203	0.163421	0.433499	1.51724	14	38
GSE2770_UNTREATED_VS_TGFB_AND_IL12_TREATED_ACT_CD4_TCELL_6H_DN	0.00858369	0.0837676	0.358272	1.51683	3	97
GO_PROTEIN_ACTIVATION_CASCADE	0.0489796	0.212972	0.519666	1.51673	23	19
GSE17721_POLYIC_VS_CPG_8H_BMDC_DN	0.00469484	0.0613588	0.334483	1.51667	1	162
GSE9316_IL6_KO_VS_IFNG_KO_INVIVO_EXPANDED_CD4_TCELL_DN	0.0114679	0.0943137	0.339005	1.51664	4	145
GSE32423_MEMORY_VS_NAIVE_CD8_TCELL_IL7_DN	0.0114679	0.0943137	0.338947	1.51638	4	145
GSE41867_DAY6_EFFECTOR_VS_DAY30_EXHAUSTED_CD8_TCELL_LCMV_CLONE13_DN	0.00475059	0.0613588	0.336653	1.51637	1	158
GSE17721_0.5H_VS_12H_PAM3CSK4_BMDC_UP	0.00461894	0.0613588	0.337005	1.51598	1	151
GSE14699_NAIVE_VS_ACT_CD8_TCELL_DN	0.00888889	0.0837676	0.34168	1.51597	3	133
V$PPAR_DR1_Q2	0.0114943	0.0943137	0.338749	1.51579	4	144
GO_REGULATION_OF_COFACTOR_METABOLIC_PROCESS	0.0252632	0.144957	0.451131	1.51563	11	34
GO_REGULATION_OF_COENZYME_METABOLIC_PROCESS	0.0252632	0.144957	0.451131	1.51563	11	34
GSE24292_WT_VS_PPARG_KO_MACROPHAGE_DN	0.00473934	0.0613588	0.332863	1.515	1	168
GSE3720_VD1_VS_VD2_GAMMADELTA_TCELL_WITH_LPS_STIM_UP	0.00917431	0.0838159	0.341881	1.51498	3	136
GO_RNA_STABILIZATION	0.0404858	0.189137	0.481295	1.51486	19	25
GSE3720_UNSTIM_VS_LPS_STIM_VD2_GAMMADELTA_TCELL_DN	0.00645161	0.0748712	0.380671	1.51486	2	72
SRC_UP.V1_DN	0.00840336	0.0837676	0.370116	1.51452	3	79
CARD_MIR302A_TARGETS	0.0181087	0.119489	0.409046	1.51452	8	50
GSE7509_DC_VS_MONOCYTE_WITH_FCGRIIB_STIM_DN	0.00473934	0.0613588	0.337026	1.51429	1	156
GSE23502_BM_VS_COLON_TUMOR_HDC_KO_MYELOID_DERIVED_SUPPRESSOR_CELL_DN	0.00470588	0.0613588	0.335275	1.51429	1	160
GSE7219_UNSTIM_VS_LPS_AND_ANTI_CD40_STIM_DC_DN	0.00917431	0.0838159	0.341713	1.51423	3	136
HWANG_PROSTATE_CANCER_MARKERS	0.0509165	0.217684	0.511634	1.51412	24	20
DER_IFN_GAMMA_RESPONSE_UP	0.0102249	0.0892681	0.396684	1.51361	4	58
WANG_HCP_PROSTATE_CANCER	0.0105708	0.0910398	0.389592	1.51293	4	64
SENESE_HDAC1_TARGETS_UP	0.00461894	0.0613588	0.307028	1.5128	1	324
MODULE_47	0.00869565	0.0837676	0.3578	1.51243	3	98
GO_REGULATION_OF_CYTOKINE_SECRETION	0.00847458	0.0837676	0.372379	1.51234	3	78
GSE29164_DAY3_VS_DAY7_UNTREATED_MELANOMA_UP	0.00675676	0.0755426	0.351624	1.51219	2	114
GSE19401_PLN_VS_PEYERS_PATCH_FOLLICULAR_DC_DN	0.00473934	0.0613588	0.33217	1.51185	1	168
GSE36888_UNTREATED_VS_IL2_TREATED_STAT5_AB_KNOCKIN_TCELL_2H_DN	0.00896861	0.0837676	0.343749	1.51171	3	128
GSE7852_THYMUS_VS_FAT_TCONV_DN	0.00697674	0.0755821	0.337627	1.51154	2	148
GO_FOLIC_ACID_CONTAINING_COMPOUND_METABOLIC_PROCESS	0.0460922	0.204911	0.526863	1.5112	22	18
ABRAMSON_INTERACT_WITH_AIRE	0.01875	0.120975	0.42582	1.51076	8	42
GO_POSITIVE_REGULATION_OF_RELEASE_OF_SEQUESTERED_CALCIUM_ION_INTO_CYTOSOL	0.0460922	0.204911	0.526708	1.51076	22	18
GSE23502_WT_VS_HDC_KO_MYELOID_DERIVED_SUPPRESSOR_CELL_COLON_TUMOR_UP	0.00464037	0.0613588	0.335685	1.51065	1	152
GSE7548_DAY7_VS_DAY28_PCC_IMMUNIZATION_CD4_TCELL_UP	0.00896861	0.0837676	0.345744	1.51055	3	123
GO_POSITIVE_REGULATION_OF_INTERLEUKIN_1_SECRETION	0.0478088	0.209722	0.554828	1.51054	23	15
GSE17580_UNINFECTED_VS_S_MANSONI_INF_TEFF_UP	0.00465116	0.0613588	0.335976	1.51046	1	153
GSE35685_CD34POS_CD38NEG_VS_CD34POS_CD10NEG_CD62LPOS_BONE_MARROW_DN	0.00888889	0.0837676	0.340393	1.51026	3	133
MCBRYAN_PUBERTAL_TGFB1_TARGETS_UP	0.00873362	0.0837676	0.346613	1.51009	3	118
GSE15930_STIM_VS_STIM_AND_TRICHOSTATINA_48H_CD8_T_CELL_DN	0.00462963	0.0613588	0.333251	1.50987	1	161
GSE15930_NAIVE_VS_48H_IN_VITRO_STIM_CD8_TCELL_DN	0.00461894	0.0613588	0.32547	1.50944	1	189
IVANOVA_HEMATOPOIESIS_MATURE_CELL	0.00455581	0.0613588	0.316882	1.50919	1	236
GSE40274_CTRL_VS_FOXP3_AND_GATA1_TRANSDUCED_ACTIVATED_CD4_TCELL_DN	0.00869565	0.0837676	0.356975	1.50894	3	98
GSE19401_PAM2CSK4_VS_RETINOIC_ACID_AND_PAM2CSK4_STIM_FOLLICULAR_DC_DN	0.00469484	0.0613588	0.331691	1.50879	1	166
GO_RIBOSOME_BIOGENESIS	0.00468384	0.0613588	0.310646	1.50872	1	285
MORF_GMPS	0.0140845	0.104366	0.401605	1.50851	6	52
GO_DNA_METHYLATION_OR_DEMETHYLATION	0.033195	0.169848	0.430973	1.50839	15	38
DUTERTRE_ESTRADIOL_RESPONSE_24HR_DN	0.00460829	0.0613588	0.307742	1.5083	1	303
GSE43863_NAIVE_VS_MEMORY_TH1_CD4_TCELL_D150_LCMV_UP	0.00869565	0.0837676	0.38444	1.50825	3	68
LINDSTEDT_DENDRITIC_CELL_MATURATION_A	0.0160966	0.111956	0.409216	1.50823	7	49
GSE39556_UNTREATED_VS_3H_POLYIC_INJ_MOUSE_CD8A_DC_UP	0.00890869	0.0837676	0.345856	1.50789	3	121
BILD_CTNNB1_ONCOGENIC_SIGNATURE	0.0144928	0.105348	0.390833	1.50755	6	62
KASLER_HDAC7_TARGETS_1_UP	0.00462963	0.0613588	0.335239	1.50738	1	154
GO_AMINO_ACID_TRANSPORT	0.0102881	0.0896436	0.395402	1.50723	4	57
YAO_TEMPORAL_RESPONSE_TO_PROGESTERONE_CLUSTER_2	0.014433	0.105085	0.416541	1.50696	6	46
GSE41867_DAY15_EFFECTOR_VS_DAY30_EXHAUSTED_CD8_TCELL_LCMV_CLONE13_DN	0.00462963	0.0613588	0.332456	1.50627	1	161
GSE21063_WT_VS_NFATC1_KO_3H_ANTI_IGM_STIM_BCELL_UP	0.00641026	0.0748712	0.356425	1.50616	2	96
LANG_MYB_FAMILY_TARGETS	0.0356394	0.176482	0.469045	1.50612	16	29
GSE16385_MONOCYTE_VS_12H_ROSIGLITAZONE_IFNG_TNF_TREATED_MACROPHAGE_DN	0.00464037	0.0613588	0.334658	1.50603	1	152
GSE17974_CTRL_VS_ACT_IL4_AND_ANTI_IL12_6H_CD4_TCELL_DN	0.00896861	0.0837676	0.344709	1.50603	3	123
GO_NEGATIVE_REGULATION_OF_HOMEOSTATIC_PROCESS	0.00631579	0.0743606	0.364507	1.50601	2	83
GSE30971_WBP7_HET_VS_KO_MACROPHAGE_DN	0.00890869	0.0837676	0.347475	1.50572	3	119
EBAUER_TARGETS_OF_PAX3_FOXO1_FUSION_UP	0.00641026	0.0748712	0.356315	1.50569	2	96
MODULE_64	0.0022779	0.0395954	0.320702	1.50559	0	206
GHANDHI_DIRECT_IRRADIATION_UP	0.0102669	0.0895178	0.396645	1.5055	4	56
GSE22443_NAIVE_VS_ACT_AND_IL12_TREATED_CD8_TCELL_UP	0.0047619	0.0613588	0.330594	1.50547	1	169
GSE34006_WT_VS_A2AR_KO_TREG_UP	0.00894855	0.0837676	0.342856	1.50509	3	125
ACAACCT,MIR-453	0.0356394	0.176482	0.468513	1.50441	16	29
MODULE_288	0.0498008	0.214984	0.552503	1.50421	24	15
GSE24142_EARLY_THYMIC_PROGENITOR_VS_DN2_THYMOCYTE_UP	0.00469484	0.0613588	0.331415	1.50276	1	162
GSE15930_NAIVE_VS_24H_IN_VITRO_STIM_INFAB_CD8_TCELL_DN	0.00696056	0.0755821	0.326032	1.50271	2	185
GSE22886_DC_VS_MONOCYTE_UP	0.00921659	0.0840099	0.335778	1.50261	3	147
GO_RECEPTOR_ACTIVITY	0.00470588	0.0613588	0.297976	1.50199	1	400
GSE29618_MONOCYTE_VS_MDC_DAY7_FLU_VACCINE_UP	0.00462963	0.0613588	0.33404	1.50199	1	154
ICHIBA_GRAFT_VERSUS_HOST_DISEASE_D7_UP	0.00631579	0.0743606	0.363516	1.50191	2	83
CAFFAREL_RESPONSE_TO_THC_DN	0.035343	0.17573	0.477674	1.50162	16	26
GO_N_TERMINAL_PROTEIN_AMINO_ACID_MODIFICATION	0.056	0.230743	0.49831	1.50119	27	21
LEI_MYB_TARGETS	0.00226244	0.0395954	0.316866	1.50108	0	226
MODULE_171	0.00630252	0.0743606	0.371921	1.50069	2	76
MARSON_FOXP3_TARGETS_DN	0.0208333	0.128231	0.422935	1.50052	9	42
GSE28737_WT_VS_BCL6_HET_MARGINAL_ZONE_BCELL_DN	0.00894855	0.0837676	0.341811	1.5005	3	125
GO_STEROID_HORMONE_RECEPTOR_BINDING	0.0105708	0.0910398	0.386366	1.5004	4	64
GO_CELLULAR_RESPONSE_TO_NUTRIENT	0.0607287	0.241166	0.489762	1.49973	29	22
GO_RESPONSE_TO_GAMMA_RADIATION	0.0183673	0.119989	0.422659	1.49953	8	40
SENGUPTA_NASOPHARYNGEAL_CARCINOMA_WITH_LMP1_UP	0.00451467	0.0613588	0.312476	1.49935	1	244
GSE3982_EOSINOPHIL_VS_MAST_CELL_DN	0.00465116	0.0613588	0.3335	1.49933	1	153
GSE41176_WT_VS_TAK1_KO_ANTI_IGM_STIM_BCELL_6H_DN	0.0047619	0.0613588	0.329213	1.49918	1	169
MTOR_UP.V1_UP	0.00436681	0.0613588	0.353918	1.49908	1	101
LEE_CALORIE_RESTRICTION_MUSCLE_UP	0.04	0.18838	0.471783	1.49902	18	28
JIANG_AGING_HYPOTHALAMUS_UP	0.0229167	0.136644	0.422472	1.49888	10	42
REACTOME_SLC_MEDIATED_TRANSMEMBRANE_TRANSPORT	0.00675676	0.0755426	0.348488	1.4987	2	114
KAECH_DAY15_EFF_VS_MEMORY_CD8_TCELL_DN	0.00478469	0.0614158	0.333579	1.49867	1	157
GSE339_CD4POS_VS_CD4CD8DN_DC_DN	0.0115741	0.0943137	0.335526	1.4986	4	143
GSE30971_CTRL_VS_LPS_STIM_MACROPHAGE_WBP7_KO_2H_UP	0.00663717	0.0755426	0.348079	1.49838	2	112
ZWANG_TRANSIENTLY_UP_BY_2ND_EGF_PULSE_ONLY	0.00469484	0.0613588	0.296139	1.49812	1	406
TANG_SENESCENCE_TP53_TARGETS_UP	0.0466531	0.206268	0.540717	1.49799	22	16
MODULE_337	0.0160966	0.111956	0.406337	1.49762	7	49
GSE5503_MLN_DC_VS_PLN_DC_ACTIVATED_ALLOGENIC_TCELL_DN	0.00917431	0.0838159	0.337959	1.4976	3	136
YAO_TEMPORAL_RESPONSE_TO_PROGESTERONE_CLUSTER_17	0.00714286	0.0755821	0.330342	1.49751	2	164
GSE7509_UNSTIM_VS_IFNA_STIM_IMMATURE_DC_DN	0.00884956	0.0837676	0.338859	1.49717	3	129
GO_REGULATION_OF_MULTICELLULAR_ORGANISM_GROWTH	0.0354167	0.1759	0.434488	1.49684	16	36
GNF2_XRCC5	0.00662252	0.0755125	0.382212	1.49667	2	69
GO_RESPONSE_TO_COLD	0.035343	0.17573	0.476026	1.49645	16	26
MUELLER_PLURINET	0.00674157	0.0755426	0.309834	1.49605	2	262
GSE29618_LAIV_VS_TIV_FLU_VACCINE_DAY7_PDC_UP	0.0114679	0.0943137	0.334401	1.49604	4	145
GSE34156_UNTREATED_VS_6H_TLR1_TLR2_LIGAND_TREATED_MONOCYTE_UP	0.00917431	0.0838159	0.334888	1.49593	3	142
GSE7852_THYMUS_VS_FAT_TREG_DN	0.00884956	0.0837676	0.338529	1.49571	3	129
GO_REGULATION_OF_MUSCLE_HYPERTROPHY	0.0404858	0.189137	0.475119	1.49542	19	25
BOSCO_ALLERGEN_INDUCED_TH2_ASSOCIATED_MODULE	0.00652174	0.0750028	0.352886	1.49538	2	100
GUTIERREZ_CHRONIC_LYMPHOCYTIC_LEUKEMIA_DN	0.0344828	0.173321	0.464796	1.49473	15	30
GSE40685_TREG_VS_FOXP3_KO_TREG_PRECURSOR_DN	0.00890869	0.0837676	0.340752	1.49459	3	124
PASQUALUCCI_LYMPHOMA_BY_GC_STAGE_UP	0.00465116	0.0613588	0.324468	1.49438	1	180
MATZUK_SPERMATID_DIFFERENTIATION	0.0530612	0.223526	0.511966	1.49425	25	19
GO_PROTEIN_ACETYLATION	0.00652174	0.0750028	0.352611	1.49422	2	100
GSE21379_WT_VS_SAP_KO_TFH_CD4_TCELL_DN	0.010917	0.092885	0.342965	1.49419	4	118
GSE6269_HEALTHY_VS_FLU_INF_PBMC_DN	0.00875274	0.0837676	0.338784	1.49412	3	127
GSE24634_NAIVE_CD4_TCELL_VS_DAY3_IL4_CONV_TREG_UP	0.00894855	0.0837676	0.340263	1.49371	3	125
SCHOEN_NFKB_SIGNALING	0.0607287	0.241166	0.487763	1.49361	29	22
KEGG_ANTIGEN_PROCESSING_AND_PRESENTATION	0.0405983	0.189489	0.450518	1.4935	18	33
MIKKELSEN_MCV6_HCP_WITH_H3K27ME3	0.0181087	0.119489	0.403329	1.49335	8	50
FARMER_BREAST_CANCER_CLUSTER_1	0.0404858	0.189137	0.474376	1.49308	19	25
GSE17721_LPS_VS_GARDIQUIMOD_24H_BMDC_UP	0.00879121	0.0837676	0.335538	1.49284	3	131
GSE2585_CTEC_VS_THYMIC_DC_UP	0.00646552	0.0748712	0.34915	1.49255	2	103
GSE15324_NAIVE_VS_ACTIVATED_CD8_TCELL_DN	0.00917431	0.0838159	0.336813	1.49252	3	136
GSE32533_WT_VS_MIR17_OVEREXPRESS_ACT_CD4_TCELL_UP	0.0114679	0.0943137	0.333498	1.492	4	145
ZHU_CMV_8_HR_UP	0.031185	0.163625	0.437722	1.49187	14	35
GO_RECEPTOR_MEDIATED_ENDOCYTOSIS	0.00674157	0.0755426	0.346494	1.49173	2	113
BMI1_DN.V1_UP	0.014433	0.105085	0.386561	1.49146	6	61
GSE22886_NAIVE_CD4_TCELL_VS_12H_ACT_TH1_DN	0.00475059	0.0613588	0.326308	1.49135	1	172
GO_CELLULAR_RESPONSE_TO_ALCOHOL	0.00860215	0.0837676	0.37473	1.49122	3	72
GSE18791_CTRL_VS_NEWCASTLE_VIRUS_DC_6H_DN	0.0115741	0.0943137	0.33384	1.49107	4	143
SCHAEFFER_PROSTATE_DEVELOPMENT_12HR_UP	0.0144928	0.105348	0.386533	1.49096	6	62
GSE46606_UNSTIM_VS_CD40L_IL2_IL5_DAY1_STIMULATED_BCELL_DN	0.00917431	0.0838159	0.333637	1.49034	3	142
GO_SNRNA_BINDING	0.0315789	0.164602	0.443602	1.49034	14	34
IGLESIAS_E2F_TARGETS_UP	0.00881057	0.0837676	0.348484	1.49032	3	108
GO_CELLULAR_RESPONSE_TO_MECHANICAL_STIMULUS	0.00809717	0.0827548	0.393973	1.49031	3	54
ZHANG_TLX_TARGETS_60HR_UP	0.00225734	0.0395954	0.318086	1.49015	0	204
GO_CELLULAR_RESPONSE_TO_NITROGEN_COMPOUND	0.00460829	0.0613588	0.303093	1.49014	1	312
GNF2_MCL1	0.0202429	0.126518	0.400513	1.48991	9	51
BERENJENO_TRANSFORMED_BY_RHOA_FOREVER_DN	0.0530612	0.223526	0.510381	1.48963	25	19
ELVIDGE_HIF1A_AND_HIF2A_TARGETS_UP	0.0377358	0.182274	0.463828	1.48937	17	29
TGACCTTG_V$SF1_Q6	0.00888889	0.0837676	0.335683	1.48936	3	133
GSE32034_UNTREATED_VS_ROSIGLIZATONE_TREATED_LY6C_HIGH_MONOCYTE_UP	0.00930233	0.0840099	0.335749	1.48922	3	140
GSE32423_CTRL_VS_IL7_MEMORY_CD8_TCELL_DN	0.00631579	0.0743606	0.361422	1.48914	2	82
SMID_BREAST_CANCER_NORMAL_LIKE_UP	0.00452489	0.0613588	0.314316	1.48901	1	226
GO_REGULATION_OF_LEUKOCYTE_PROLIFERATION	0.013245	0.102282	0.342665	1.4888	5	117
GSE15624_CTRL_VS_6H_HALOFUGINONE_TREATED_CD4_TCELL_DN	0.00917431	0.0838159	0.335949	1.48869	3	136
GSE11057_PBMC_VS_MEM_CD4_TCELL_UP	0.00907029	0.0838159	0.335621	1.48857	3	135
GSE22935_WT_VS_MYD88_KO_MACROPHAGE_12H_MBOVIS_BCG_STIM_UP	0.00890869	0.0837676	0.341303	1.48804	3	121
JAZAERI_BREAST_CANCER_BRCA1_VS_BRCA2_DN	0.0499002	0.215077	0.476716	1.48795	24	24
GO_TELOMERE_MAINTENANCE_VIA_TELOMERASE	0.0557769	0.23011	0.546502	1.48787	27	15
GO_POSITIVE_REGULATION_OF_CYTOKINE_SECRETION	0.0160966	0.111956	0.403682	1.48783	7	49
V$MAX_01	0.00717703	0.0756897	0.32576	1.48768	2	174
GSE27786_NKTCELL_VS_NEUTROPHIL_UP	0.00475059	0.0613588	0.328382	1.48734	1	163
GO_NEGATIVE_REGULATION_OF_T_CELL_PROLIFERATION	0.0499002	0.215077	0.47649	1.48725	24	24
GROSS_ELK3_TARGETS_DN	0.0499002	0.215077	0.476476	1.48721	24	24
MORF_SOD1	0.00445434	0.0613588	0.307327	1.48679	1	266
RHODES_CANCER_META_SIGNATURE	0.0102249	0.0892681	0.389599	1.48658	4	58
CHIARADONNA_NEOPLASTIC_TRANSFORMATION_KRAS_CDC25_UP	0.0289256	0.156252	0.422955	1.48656	13	39
GO_REGULATION_OF_PROTEIN_SECRETION	0.00461894	0.0613588	0.319718	1.48656	1	197
GSE28783_ANTI_MIR33_VS_UNTREATED_ATHEROSCLEROSIS_MACROPHAGE_UP	0.00875274	0.0837676	0.337068	1.48655	3	127
GRAHAM_CML_QUIESCENT_VS_NORMAL_QUIESCENT_UP	0.00662252	0.0755125	0.379597	1.48643	2	69
NAKAMURA_METASTASIS	0.0377358	0.182274	0.462857	1.48625	17	29
GSE11057_CD4_CENT_MEM_VS_PBMC_UP	0.0114943	0.0943137	0.332129	1.48617	4	144
GO_POSITIVE_REGULATION_OF_FIBROBLAST_PROLIFERATION	0.042735	0.195546	0.448261	1.48601	19	33
GSE22025_TGFB1_VS_TGFB1_AND_PROGESTERONE_TREATED_CD4_TCELL_UP	0.00904977	0.0838159	0.340639	1.48554	3	122
PID_TAP63_PATHWAY	0.031185	0.163625	0.435786	1.48527	14	35
GRAHAM_NORMAL_QUIESCENT_VS_NORMAL_DIVIDING_UP	0.0208768	0.12838	0.407061	1.48515	9	48
GO_REGULATION_OF_CELL_SIZE	0.00652174	0.0750028	0.348254	1.48497	2	105
ZHANG_PROLIFERATING_VS_QUIESCENT	0.0207039	0.127846	0.414748	1.4848	9	44
GSE17721_PAM3CSK4_VS_GADIQUIMOD_8H_BMDC_DN	0.00464037	0.0613588	0.329913	1.48468	1	152
GSE29949_MICROGLIA_BRAIN_VS_CD8_POS_DC_SPLEEN_DN	0.00843882	0.0837676	0.362386	1.48467	3	81
GO_SOLUTE_CATION_SYMPORTER_ACTIVITY	0.0472103	0.207847	0.455746	1.48444	21	31
GO_RESPONSE_TO_LITHIUM_ION	0.0557769	0.23011	0.545235	1.48442	27	15
GSE17721_LPS_VS_POLYIC_0.5H_BMDC_UP	0.00877193	0.0837676	0.334068	1.48435	3	130
GO_SIGNALING_RECEPTOR_ACTIVITY	0.00677201	0.0755426	0.303722	1.48419	2	290
GSE34392_ST2_KO_VS_WT_DAY8_LCMV_EFFECTOR_CD8_TCELL_DN	0.00930233	0.0840099	0.331511	1.48415	3	148
GO_POSITIVE_REGULATION_OF_RESPONSE_TO_BIOTIC_STIMULUS	0.0632653	0.245197	0.481012	1.48367	30	23
GSE1460_CD4_THYMOCYTE_VS_THYMIC_STROMAL_CELL_DN	0.00675676	0.0755426	0.344981	1.48362	2	114
GO_REGULATION_OF_CYTOKINE_PRODUCTION_INVOLVED_IN_IMMUNE_RESPONSE	0.0474138	0.208605	0.451092	1.48356	21	32
HOUSTIS_ROS	0.0364026	0.179265	0.4722	1.48342	16	27
MCLACHLAN_DENTAL_CARIES_UP	0.00705882	0.0755821	0.32844	1.48341	2	160
GSE15930_STIM_VS_STIM_AND_IFNAB_48H_CD8_T_CELL_DN	0.00936768	0.084315	0.330935	1.48315	3	149
GSE1740_MCSF_VS_MCSF_AND_IFNG_DAY2_DERIVED_MACROPHAGE_WITH_IFNA_STIM_DN	0.0182927	0.119948	0.384725	1.48311	8	60
WANG_SMARCE1_TARGETS_DN	0.00454545	0.0613588	0.309609	1.48287	1	242
V$AP1_Q4	0.00930233	0.0840099	0.33116	1.48258	3	148
HUANG_GATA2_TARGETS_DN	0.0144033	0.104983	0.38878	1.48198	6	57
SESTO_RESPONSE_TO_UV_C4	0.0507099	0.217456	0.534881	1.48182	24	16
GSE33513_TCF7_KO_VS_HET_EARLY_THYMIC_PROGENITOR_UP	0.00858369	0.0837676	0.349987	1.48175	3	97
MODULE_176	0.0204082	0.127254	0.387929	1.48095	9	59
MORF_PTPRR	0.0538922	0.225959	0.47438	1.48066	26	24
GO_NEURAL_CREST_CELL_DIFFERENTIATION	0.0558882	0.230427	0.474231	1.4802	27	24
GO_PROTEIN_LIPID_COMPLEX	0.0541082	0.226407	0.515869	1.47966	26	18
GSE16385_ROSIGLITAZONE_IFNG_TNF_VS_IL4_STIM_MACROPHAGE_UP	0.00886918	0.0837676	0.332916	1.4794	3	132
GO_POSITIVE_REGULATION_OF_CHROMOSOME_ORGANIZATION	0.0111359	0.0940291	0.339294	1.47928	4	121
GO_VASCULOGENESIS	0.0385439	0.184577	0.470854	1.47919	17	27
GSE2706_UNSTIM_VS_8H_LPS_DC_DN	0.00896861	0.0837676	0.338558	1.47916	3	123
GO_TRANSLATION_INITIATION_FACTOR_ACTIVITY	0.0207039	0.127846	0.413068	1.47879	9	44
GO_N_ACYLTRANSFERASE_ACTIVITY	0.0105932	0.091174	0.364107	1.47875	4	78
GO_CELLULAR_IRON_ION_HOMEOSTASIS	0.0385439	0.184577	0.470634	1.4785	17	27
PECE_MAMMARY_STEM_CELL_DN	0.00649351	0.0750028	0.347334	1.47838	2	102
GSE14000_UNSTIM_VS_4H_LPS_DC_DN	0.011236	0.094161	0.333144	1.47797	4	134
GSE13887_ACT_CD4_VS_NO_TREATED_CD4_TCELL_UP	0.04158	0.191969	0.470012	1.47754	19	26
chr10q23	0.0315789	0.164602	0.439792	1.47754	14	34
JOHNSTONE_PARVB_TARGETS_3_UP	0.00455581	0.0613588	0.300442	1.47753	1	309
SMID_BREAST_CANCER_LUMINAL_A_UP	0.0377358	0.182274	0.460138	1.47752	17	29
GSE24081_CONTROLLER_VS_PROGRESSOR_HIV_SPECIFIC_CD8_TCELL_UP	0.013245	0.102282	0.340008	1.47726	5	117
GSE37416_CTRL_VS_0H_F_TULARENSIS_LVS_NEUTROPHIL_DN	0.025	0.144003	0.416377	1.47725	11	42
GO_REGULATION_OF_EXTRINSIC_APOPTOTIC_SIGNALING_PATHWAY	0.00858369	0.0837676	0.348913	1.47721	3	97
GSE36888_UNTREATED_VS_IL2_TREATED_TCELL_2H_UP	0.00913242	0.0838159	0.332536	1.47718	3	137
EHLERS_ANEUPLOIDY_UP	0.035343	0.17573	0.433323	1.47688	16	35
GSE24142_ADULT_VS_FETAL_DN3_THYMOCYTE_UP	0.00936768	0.084315	0.329513	1.47677	3	149
GO_LIPASE_ACTIVITY	0.0181087	0.119489	0.39882	1.47666	8	50
AAGCCAT,MIR-135A,MIR-135B	0.00458716	0.0613588	0.314719	1.4764	1	210
GSE17721_PAM3CSK4_VS_GADIQUIMOD_0.5H_BMDC_UP	0.0110132	0.0935249	0.345019	1.4755	4	108
GO_NEGATIVE_REGULATION_OF_LEUKOCYTE_PROLIFERATION	0.0357143	0.176656	0.425772	1.47544	16	37
REACTOME_CLASS_A1_RHODOPSIN_LIKE_RECEPTORS	0.0105042	0.0907734	0.360431	1.47489	4	79
GO_REGULATION_OF_CARTILAGE_DEVELOPMENT	0.0591837	0.237979	0.505241	1.47463	28	19
HELLEBREKERS_SILENCED_DURING_TUMOR_ANGIOGENESIS	0.0304878	0.160985	0.414586	1.47448	14	41
MORF_PPP1CC	0.00473934	0.0613588	0.328163	1.47447	1	156
GSE5099_CLASSICAL_M1_VS_ALTERNATIVE_M2_MACROPHAGE_UP	0.00917431	0.0838159	0.332723	1.47439	3	136
PID_P53_REGULATION_PATHWAY	0.0140845	0.104366	0.389915	1.47438	6	53
GSE15139_GMCSF_TREATED_VS_UNTREATED_NEUTROPHILS_DN	0.007109	0.0755821	0.323896	1.47419	2	168
GSE6269_FLU_VS_STAPH_AUREUS_INF_PBMC_DN	0.0116279	0.0943137	0.332282	1.47384	4	140
GSE29618_MONOCYTE_VS_PDC_DN	0.0114943	0.0943137	0.329357	1.47377	4	144
GSE37533_PPARG1_FOXP3_VS_FOXP3_TRANSDUCED_CD4_TCELL_PIOGLITAZONE_TREATED_UP	0.0114679	0.0943137	0.329413	1.47372	4	145
GO_ION_HOMEOSTASIS	0.00677201	0.0755426	0.30442	1.47369	2	272
GO_RESPONSE_TO_NITROGEN_COMPOUND	0.00240385	0.0395954	0.286613	1.47349	0	490
NAM_FXYD5_TARGETS_DN	0.0527383	0.222645	0.531847	1.47342	25	16
KEGG_RETINOL_METABOLISM	0.059761	0.238931	0.540984	1.47285	29	15
GO_POSITIVE_REGULATION_OF_CALCIUM_ION_IMPORT	0.0558882	0.230427	0.471686	1.47225	27	24
LIU_VAV3_PROSTATE_CARCINOGENESIS_UP	0.0229645	0.136754	0.403424	1.47188	10	48
GSE43955_1H_VS_60H_ACT_CD4_TCELL_UP	0.00938967	0.084315	0.32454	1.47158	3	162
GSE20366_TREG_VS_NAIVE_CD4_TCELL_HOMEOSTATIC_CONVERSION_UP	0.00884956	0.0837676	0.333059	1.47154	3	129
GSE29618_LAIV_VS_TIV_FLU_VACCINE_DAY7_MDC_UP	0.00894855	0.0837676	0.33518	1.4714	3	125
HOLLEMAN_ASPARAGINASE_RESISTANCE_B_ALL_UP	0.0714286	0.262173	0.477019	1.47135	34	23
GO_DOUBLE_STRANDED_RNA_BINDING	0.0181087	0.119489	0.397261	1.47089	8	50
SENESE_HDAC2_TARGETS_UP	0.0105263	0.0907734	0.356889	1.47046	4	82
REACTOME_TRANSMEMBRANE_TRANSPORT_OF_SMALL_MOLECULES	0.00461894	0.0613588	0.316873	1.47027	1	190
GSE22313_HEALTHY_VS_SLE_MOUSE_CD4_TCELL_DN	0.007109	0.0755821	0.325937	1.47001	2	159
LIU_BREAST_CANCER	0.0561122	0.231066	0.512497	1.46999	27	18
GSE37301_COMMON_LYMPHOID_PROGENITOR_VS_GRAN_MONO_PROGENITOR_DN	0.00883002	0.0837676	0.341993	1.46959	3	110
GO_LUNG_ALVEOLUS_DEVELOPMENT	0.0714286	0.262173	0.476365	1.46933	34	23
V$NRF2_Q4	0.0116279	0.0943137	0.331222	1.46914	4	140
GROSS_HYPOXIA_VIA_ELK3_AND_HIF1A_DN	0.0129032	0.100454	0.351068	1.46905	5	90
GSE29949_MICROGLIA_BRAIN_VS_CD8_NEG_DC_SPLEEN_UP	0.0107991	0.0923157	0.343305	1.46894	4	104
MORF_IFNA1	0.0143149	0.104832	0.384934	1.46878	6	58
TARTE_PLASMA_CELL_VS_PLASMABLAST_DN	0.00677201	0.0755426	0.30054	1.46864	2	290
MCBRYAN_PUBERTAL_BREAST_4_5WK_DN	0.00904977	0.0838159	0.336728	1.46849	3	122
GO_EXTRACELLULAR_MATRIX	0.00862069	0.0837676	0.352061	1.4684	3	89
ZHU_CMV_8_HR_DN	0.0315789	0.164602	0.437032	1.46826	14	34
GO_LYSOSOMAL_LUMEN	0.0123203	0.0972465	0.386724	1.46784	5	56
GAANYNYGACNY_UNKNOWN	0.0285714	0.155028	0.413717	1.4678	13	40
GO_REGULATION_OF_T_CELL_MIGRATION	0.0547667	0.22784	0.529781	1.46769	26	16
GO_POSITIVE_REGULATION_OF_PROTEIN_SECRETION	0.00869565	0.0837676	0.344167	1.46754	3	105
GO_SUGAR_TRANSMEMBRANE_TRANSPORTER_ACTIVITY	0.0547667	0.22784	0.529614	1.46723	26	16
GO_HEME_BIOSYNTHETIC_PROCESS	0.0632653	0.245197	0.502689	1.46718	30	19
RHEIN_ALL_GLUCOCORTICOID_THERAPY_UP	0.0144033	0.104983	0.384822	1.4669	6	57
GO_MRNA_BINDING	0.013363	0.102896	0.338427	1.46652	5	119
GSE21927_UNTREATED_VS_GMCSF_GCSF_TREATED_BONE_MARROW_DN	0.013363	0.102896	0.338395	1.46638	5	119
MILI_PSEUDOPODIA_CHEMOTAXIS_DN	0.00694444	0.0755821	0.2933	1.46638	2	359
GSE339_EX_VIVO_VS_IN_CULTURE_CD8POS_DC_DN	0.00941176	0.084315	0.324637	1.46624	3	160
HELLER_SILENCED_BY_METHYLATION_UP	0.007109	0.0755821	0.322109	1.46606	2	168
MORF_ACP1	0.0045045	0.0613588	0.311832	1.46604	1	207
GSE2826_WT_VS_BTK_KO_BCELL_DN	0.00875274	0.0837676	0.332404	1.46598	3	127
KAECH_DAY8_EFF_VS_MEMORY_CD8_TCELL_DN	0.00704225	0.0755821	0.322224	1.46573	2	166
GSE43955_1H_VS_20H_ACT_CD4_TCELL_WITH_TGFB_IL6_DN	0.0111607	0.0940439	0.340323	1.46543	4	115
ZHU_CMV_ALL_UP	0.00873362	0.0837676	0.345915	1.46518	3	101
GSE40274_FOXP3_VS_FOXP3_AND_XBP1_TRANSDUCED_ACTIVATED_CD4_TCELL_DN	0.00883002	0.0837676	0.340959	1.46515	3	111
RUTELLA_RESPONSE_TO_HGF_DN	0.00456621	0.0613588	0.314521	1.4651	1	193
DURCHDEWALD_SKIN_CARCINOGENESIS_DN	0.00456621	0.0613588	0.314506	1.46503	1	193
GO_POSITIVE_REGULATION_OF_PROTEIN_BINDING	0.0181087	0.119489	0.38742	1.46495	8	53
NATSUME_RESPONSE_TO_INTERFERON_BETA_UP	0.0242915	0.141815	0.405372	1.46493	11	45
GSE40277_GATA1_AND_SATB1_TRANSDUCED_VS_CTRL_CD4_TCELL_DN	0.00894855	0.0837676	0.333696	1.46488	3	125
GSE40274_CTRL_VS_SATB1_TRANSDUCED_ACTIVATED_CD4_TCELL_DN	0.00888889	0.0837676	0.330125	1.4647	3	133
GO_RESPONSE_TO_LIPID	0.00241546	0.0397377	0.284976	1.46381	0	489
PID_NFAT_TFPATHWAY	0.0431034	0.196091	0.455139	1.46367	19	30
GAUSSMANN_MLL_AF4_FUSION_TARGETS_A_UP	0.00884956	0.0837676	0.339996	1.46358	3	112
GO_TRNA_BINDING	0.035124	0.17499	0.416396	1.46351	16	39
LEE_EARLY_T_LYMPHOCYTE_DN	0.0484211	0.211644	0.460566	1.46338	22	28
STK33_SKM_UP	0.00696056	0.0755821	0.316478	1.46335	2	187
TAAYNRNNTCC_UNKNOWN	0.0107527	0.0922119	0.367707	1.46327	4	72
MORF_G22P1	0.00714286	0.0755821	0.321322	1.46325	2	169
GO_POSITIVE_REGULATION_OF_CELL_DIFFERENTIATION	0.00469484	0.0613588	0.288017	1.4632	1	421
BIOCARTA_PTDINS_PATHWAY	0.066	0.251711	0.485616	1.46295	32	21
GO_TRANSCRIPTION_FROM_RNA_POLYMERASE_III_PROMOTER	0.0375	0.181857	0.424626	1.46286	17	36
KEGG_JAK_STAT_SIGNALING_PATHWAY	0.0105042	0.0907734	0.357388	1.46244	4	79
GSE5589_UNSTIM_VS_45MIN_LPS_AND_IL6_STIM_MACROPHAGE_DN	0.00925926	0.0840099	0.325201	1.46224	3	154
YGACNNYACAR_UNKNOWN	0.0201207	0.126226	0.394876	1.46205	9	50
V$ARNT_01	0.00699301	0.0755821	0.321516	1.46166	2	165
GSE360_L_MAJOR_VS_T_GONDII_DC_UP	0.0108696	0.092599	0.372519	1.46148	4	68
GSE22886_NAIVE_BCELL_VS_MONOCYTE_UP	0.0107527	0.0922119	0.367219	1.46133	4	72
SCHRAETS_MLL_TARGETS_UP	0.0589431	0.23725	0.519985	1.4611	28	17
TTTGCAC,MIR-19A,MIR-19B	0.00458716	0.0613588	0.293156	1.46064	1	340
DORN_ADENOVIRUS_INFECTION_24HR_DN	0.0517241	0.219622	0.44404	1.46037	23	32
V$HNF1_C	0.0105263	0.0907734	0.3534	1.46012	4	83
GO_RESPONSE_TO_HORMONE	0.00240385	0.0395954	0.283991	1.46001	0	490
MATTIOLI_MULTIPLE_MYELOMA_WITH_14Q32_TRANSLOCATIONS	0.066	0.251711	0.484601	1.45989	32	21
AZARE_STAT3_TARGETS	0.0621242	0.243099	0.508942	1.4598	30	18
GO_NEGATIVE_REGULATION_OF_PROTEIN_POLYMERIZATION	0.0512821	0.218578	0.440315	1.45967	23	33
GSE46143_CTRL_VS_LMP2A_TRANSDUCED_CD10_POS_GC_BCELL_UP	0.0133038	0.102617	0.335711	1.45943	5	120
GSE25123_WT_VS_PPARG_KO_MACROPHAGE_IL4_STIM_DN	0.0114679	0.0943137	0.326612	1.45896	4	142
GSE44649_WT_VS_MIR155_KO_ACTIVATED_CD8_TCELL_UP	0.00699301	0.0755821	0.324407	1.45849	2	155
GO_POSITIVE_REGULATION_OF_ESTABLISHMENT_OF_PROTEIN_LOCALIZATION	0.00457666	0.0613588	0.29666	1.45849	1	307
BILANGES_SERUM_SENSITIVE_VIA_TSC2	0.0484211	0.211644	0.458908	1.45811	22	28
GSE5589_LPS_VS_LPS_AND_IL6_STIM_IL6_KO_MACROPHAGE_45MIN_DN	0.007109	0.0755821	0.320358	1.45808	2	168
GSE7219_WT_VS_NIK_NFKB2_KO_LPS_AND_ANTI_CD40_STIM_DC_DN	0.00917431	0.0838159	0.328184	1.4578	3	138
HOWLIN_CITED1_TARGETS_1_UP	0.0653061	0.250206	0.499453	1.45774	31	19
GO_CELLULAR_RESPONSE_TO_LIPID	0.00671141	0.0755426	0.300952	1.45757	2	270
PID_HDAC_CLASSIII_PATHWAY	0.066	0.251711	0.483811	1.45751	32	21
RUTELLA_RESPONSE_TO_CSF2RB_AND_IL4_DN	0.00686499	0.0755821	0.30284	1.45704	2	252
GSE339_CD4POS_VS_CD8POS_DC_UP	0.00941176	0.084315	0.322486	1.45653	3	160
GO_DENDRITIC_CELL_MIGRATION	0.0657371	0.251164	0.534983	1.45651	32	15
V$ZIC1_01	0.0116279	0.0943137	0.328276	1.45607	4	140
GO_PEPTIDE_N_ACETYLTRANSFERASE_ACTIVITY	0.0143737	0.104983	0.383547	1.45578	6	56
GO_CELLULAR_RESPONSE_TO_KETONE	0.0271399	0.150548	0.399	1.45574	12	48
GO_REGULATION_OF_EPITHELIAL_CELL_PROLIFERATION	0.0137615	0.103872	0.32851	1.45572	5	136
GSE7219_UNSTIM_VS_LPS_AND_ANTI_CD40_STIM_NIK_NFKB2_KO_DC_DN	0.00941176	0.084315	0.322249	1.45546	3	160
MODULE_352	0.0589431	0.23725	0.517949	1.45537	28	17
GSE28783_ANTI_MIR33_VS_UNTREATED_ATHEROSCLEROSIS_MACROPHAGE_DN	0.0107759	0.0922119	0.340423	1.45524	4	103
GO_POSITIVE_REGULATION_OF_CELL_ACTIVATION	0.0117096	0.0948779	0.317363	1.45476	4	175
GSE40274_FOXP3_VS_FOXP3_AND_XBP1_TRANSDUCED_ACTIVATED_CD4_TCELL_UP	0.0130719	0.101472	0.367455	1.45446	5	71
GSE42021_TCONV_PLN_VS_CD24HI_TCONV_THYMUS_UP	0.0116279	0.0943137	0.327904	1.45442	4	140
KIM_WT1_TARGETS_12HR_DN	0.00930233	0.0840099	0.324717	1.45374	3	148
GSE21927_SPLEEN_C57BL6_VS_EL4_TUMOR_BALBC_MONOCYTES_DN	0.00941176	0.084315	0.315968	1.45355	3	183
GO_ENDOCHONDRAL_BONE_MORPHOGENESIS	0.0609756	0.241358	0.51727	1.45347	29	17
MODULE_244	0.00704225	0.0755821	0.31949	1.45329	2	166
GO_RUFFLE_ORGANIZATION	0.0621242	0.243099	0.506608	1.4531	30	18
GSE30083_SP2_VS_SP4_THYMOCYTE_UP	0.0083682	0.0837676	0.370452	1.45282	3	66
GO_PROTEIN_ACYLATION	0.0155902	0.110153	0.333222	1.4528	6	121
GSE5589_LPS_AND_IL10_VS_LPS_AND_IL6_STIM_IL10_KO_MACROPHAGE_45MIN_DN	0.00888889	0.0837676	0.327279	1.45207	3	133
KUMAR_TARGETS_OF_MLL_AF9_FUSION	0.00657895	0.075309	0.299629	1.45206	2	269
GO_BIOLOGICAL_ADHESION	0.00468384	0.0613588	0.285117	1.45197	1	434
GSE2706_2H_VS_8H_LPS_STIM_DC_DN	0.0108225	0.0923157	0.341081	1.45177	4	102
GO_POSITIVE_REGULATION_OF_DEFENSE_RESPONSE	0.00663717	0.0755426	0.300621	1.45176	2	255
KEGG_DILATED_CARDIOMYOPATHY	0.0270833	0.150458	0.409138	1.45157	12	42
GO_REGULATION_OF_ALCOHOL_BIOSYNTHETIC_PROCESS	0.0506073	0.217101	0.461125	1.45138	24	25
GSE17721_0.5H_VS_4H_PAM3CSK4_BMDC_UP	0.00925926	0.0840099	0.320316	1.45127	3	161
HALLMARK_TNFA_SIGNALING_VIA_NFKB	0.00714286	0.0755821	0.320063	1.45092	2	164
WIERENGA_STAT5A_TARGETS_UP	0.0111359	0.0940291	0.330733	1.45065	4	124
GSE17721_0.5H_VS_4H_GARDIQUIMOD_BMDC_DN	0.00943396	0.0844008	0.323877	1.4505	3	150
PHONG_TNF_RESPONSE_VIA_P38_COMPLETE	0.0119617	0.0959736	0.31756	1.45023	4	174
MODULE_94	0.00697674	0.0755821	0.322564	1.45017	2	153
GO_REGULATION_OF_RESPONSE_TO_REACTIVE_OXYGEN_SPECIES	0.0733198	0.266771	0.49002	1.45016	35	20
GO_REGULATION_OF_PROTEIN_OLIGOMERIZATION	0.0621242	0.243099	0.505542	1.45004	30	18
GSE15767_MED_VS_SCS_MAC_LN_UP	0.0115473	0.0943137	0.322317	1.44991	4	151
GSE40274_FOXP3_VS_FOXP3_AND_GATA1_TRANSDUCED_ACTIVATED_CD4_TCELL_DN	0.0111359	0.0940291	0.330552	1.44985	4	124
GSE21546_ELK1_KO_VS_SAP1A_KO_AND_ELK1_KO_DP_THYMOCYTES_UP	0.0152838	0.109727	0.332786	1.44985	6	118
GO_TRABECULA_MORPHOGENESIS	0.0621242	0.243099	0.505432	1.44973	30	18
AKL_HTLV1_INFECTION_UP	0.0769231	0.273121	0.473273	1.44924	37	22
GSE11961_MARGINAL_ZONE_BCELL_VS_MEMORY_BCELL_DAY40_DN	0.0115741	0.0943137	0.324469	1.44922	4	143
BIOCARTA_P53HYPOXIA_PATHWAY	0.0609756	0.241358	0.515676	1.44899	29	17
GO_REGULATION_OF_FAT_CELL_DIFFERENTIATION	0.0244898	0.142096	0.379544	1.44894	11	59
GO_NUCLEAR_EXPORT	0.0131868	0.102068	0.325668	1.44893	5	131
GSE1460_DP_VS_CD4_THYMOCYTE_DN	0.0111359	0.0940291	0.330333	1.44889	4	124
SESTO_RESPONSE_TO_UV_C8	0.0247423	0.142826	0.400471	1.44882	11	46
GUO_TARGETS_OF_IRS1_AND_IRS2	0.0108225	0.0923157	0.363367	1.44865	4	73
SAGIV_CD24_TARGETS_DN	0.0484211	0.211644	0.455915	1.4486	22	28
GSE29618_PRE_VS_DAY7_POST_TIV_FLU_VACCINE_BCELL_UP	0.0301811	0.160206	0.38564	1.44854	14	52
GO_REGULATION_OF_LEUKOCYTE_DIFFERENTIATION	0.0115741	0.0943137	0.324287	1.4484	4	143
GSE22103_LPS_VS_GMCSF_AND_IFNG_STIM_NEUTROPHIL_DN	0.007109	0.0755821	0.322351	1.44836	2	156
GO_MLL1_2_COMPLEX	0.0506073	0.217101	0.460041	1.44796	24	25
GO_REGULATION_OF_OXIDATIVE_STRESS_INDUCED_CELL_DEATH	0.048218	0.211102	0.450824	1.44761	22	29
GSE24574_BCL6_LOW_TFH_VS_NAIVE_CD4_TCELL_UP	0.0134831	0.103286	0.326271	1.44748	5	134
GO_MRNA_CLEAVAGE	0.0609756	0.241358	0.515133	1.44746	29	17
GO_NEGATIVE_REGULATION_OF_CELL_PROLIFERATION	0.00712589	0.0755821	0.290799	1.44739	2	347
GSE24142_ADULT_VS_FETAL_EARLY_THYMIC_PROGENITOR_DN	0.0114155	0.0943137	0.323408	1.44714	4	146
MORF_CDC16	0.00883002	0.0837676	0.369553	1.4471	3	69
RODWELL_AGING_KIDNEY_UP	0.00457666	0.0613588	0.29433	1.44704	1	307
GSE11057_PBMC_VS_MEM_CD4_TCELL_DN	0.0112108	0.0940439	0.331199	1.44701	4	123
GO_SINGLE_ORGANISM_CELL_ADHESION	0.00455581	0.0613588	0.301242	1.44696	1	248
GSE13547_CTRL_VS_ANTI_IGM_STIM_ZFX_KO_BCELL_2H_DN	0.0116009	0.0943137	0.321445	1.44657	4	152
GSE26495_NAIVE_VS_PD1LOW_CD8_TCELL_DN	0.00884956	0.0837676	0.327383	1.44646	3	129
GSE360_DC_VS_MAC_M_TUBERCULOSIS_DN	0.007109	0.0755821	0.321882	1.44625	2	156
GSE4748_CTRL_VS_LPS_STIM_DC_3H_DN	0.0155211	0.110153	0.32542	1.44609	6	132
GSE2706_R848_VS_R848_AND_LPS_2H_STIM_DC_DN	0.0108696	0.092599	0.341194	1.44584	4	100
GSE8921_UNSTIM_0H_VS_TLR1_2_STIM_MONOCYTE_24H_UP	0.014862	0.107101	0.371108	1.44562	6	65
GSE19825_NAIVE_VS_IL2RALOW_DAY3_EFF_CD8_TCELL_UP	0.0265306	0.148285	0.396742	1.44542	12	47
GO_REGULATION_OF_PROTEIN_TYROSINE_KINASE_ACTIVITY	0.04158	0.191969	0.424025	1.44519	19	35
BURTON_ADIPOGENESIS_4	0.04158	0.191969	0.424007	1.44513	19	35
HAN_SATB1_TARGETS_UP	0.00457666	0.0613588	0.307085	1.44492	1	222
REACTOME_RORA_ACTIVATES_CIRCADIAN_EXPRESSION	0.0693878	0.257795	0.495009	1.44476	33	19
PEREZ_TP63_TARGETS	0.00930233	0.0840099	0.322707	1.44474	3	148
GSE5589_WT_VS_IL10_KO_LPS_AND_IL10_STIM_MACROPHAGE_180MIN_DN	0.0535332	0.225018	0.459874	1.4447	24	27
GO_POSITIVE_REGULATION_OF_DNA_BIOSYNTHETIC_PROCESS	0.0247423	0.142826	0.399323	1.44467	11	46
GSE17721_12H_VS_24H_PAM3CSK4_BMDC_UP	0.00717703	0.0756897	0.321444	1.44415	2	157
GSE36095_WT_VS_HDAC9_KO_TREG_UP	0.0115207	0.0943137	0.322608	1.44367	4	147
ZHANG_RESPONSE_TO_IKK_INHIBITOR_AND_TNF_UP	0.00930233	0.0840099	0.322447	1.44357	3	148
EIF4E_DN	0.0108225	0.0923157	0.362093	1.44357	4	73
GSE7568_IL4_VS_IL4_AND_DEXAMETHASONE_TREATED_MACROPHAGE_DN	0.0155902	0.110153	0.333128	1.44356	6	119
GSE22886_NAIVE_CD4_TCELL_VS_NKCELL_UP	0.0110375	0.0936125	0.335806	1.443	4	110
GSE6269_FLU_VS_STAPH_AUREUS_INF_PBMC_UP	0.0109409	0.0930291	0.327183	1.44295	4	127
GSE2935_UV_INACTIVATED_VS_LIVE_SENDAI_VIRUS_INF_MACROPHAGE_UP	0.0130435	0.10131	0.338368	1.44282	5	105
GSE24142_EARLY_THYMIC_PROGENITOR_VS_DN2_THYMOCYTE_ADULT_UP	0.0113122	0.0943137	0.323116	1.44271	4	141
CEBALLOS_TARGETS_OF_TP53_AND_MYC_UP	0.0669371	0.253191	0.520701	1.44254	32	16
GSE24814_STAT5_KO_VS_WT_PRE_BCELL_UP	0.0150538	0.108308	0.362468	1.44242	6	72
KHETCHOUMIAN_TRIM24_TARGETS_UP	0.043659	0.19808	0.423191	1.44235	20	35
GO_RESPONSE_TO_COCAINE	0.0877551	0.294847	0.467539	1.44211	42	23
GSE11961_GERMINAL_CENTER_BCELL_DAY7_VS_MEMORY_BCELL_DAY40_DN	0.0131291	0.101857	0.337517	1.44188	5	106
GSE21927_SPLEEN_MONOCYTE_VS_GMCSF_GCSF_BONE_MARROW_DN	0.0155211	0.110153	0.331659	1.44182	6	120
GSE27241_CTRL_VS_DIGOXIN_TREATED_CD4_TCELL_IN_TH17_POLARIZING_CONDITIONS_UP	0.0110865	0.0939681	0.327691	1.44171	4	126
PID_AR_PATHWAY	0.0271399	0.150548	0.39515	1.44169	12	48
RUTELLA_RESPONSE_TO_CSF2RB_AND_IL4_UP	0.00457666	0.0613588	0.300397	1.44134	1	249
V$LXR_DR4_Q3	0.0221328	0.133285	0.389234	1.44117	10	50
GSE26343_WT_VS_NFAT5_KO_MACROPHAGE_DN	0.0116279	0.0943137	0.320507	1.44092	4	153
GSE11864_CSF1_VS_CSF1_IFNG_IN_MAC_DN	0.0131868	0.102068	0.32385	1.44084	5	131
TAKEDA_TARGETS_OF_NUP98_HOXA9_FUSION_6HR_DN	0.0526316	0.222346	0.453303	1.4403	24	28
MODULE_85	0.0621242	0.243099	0.502124	1.44024	30	18
GCM_RAD21	0.0458333	0.204136	0.418045	1.44019	21	36
chr10q21	0.0535332	0.225018	0.458366	1.43996	24	27
NEMETH_INFLAMMATORY_RESPONSE_LPS_UP	0.012605	0.0988232	0.351882	1.43991	5	79
KEEN_RESPONSE_TO_ROSIGLITAZONE_DN	0.0126316	0.0988574	0.349442	1.43978	5	82
MCBRYAN_PUBERTAL_BREAST_6_7WK_DN	0.0265306	0.148285	0.395185	1.43974	12	47
GSE17721_CTRL_VS_LPS_8H_BMDC_DN	0.0112108	0.0940439	0.32951	1.43963	4	123
TORCHIA_TARGETS_OF_EWSR1_FLI1_FUSION_UP	0.0118483	0.0954648	0.314461	1.43932	4	173
GSE21670_TGFB_VS_IL6_TREATED_STAT3_KO_CD4_TCELL_UP	0.0155211	0.110153	0.331019	1.43904	6	120
GSE26928_EFF_MEM_VS_CENTR_MEM_CD4_TCELL_UP	0.0128755	0.100297	0.342538	1.43886	5	93
GSE13522_CTRL_VS_T_CRUZI_Y_STRAIN_INF_SKIN_BALBC_MOUSE_DN	0.0189076	0.121492	0.356569	1.43875	8	76
V$RORA1_01	0.0131868	0.102068	0.323374	1.43872	5	131
ZHU_CMV_ALL_DN	0.0168067	0.114679	0.371815	1.43854	7	63
GO_CELL_SURFACE	0.00702576	0.0755821	0.292901	1.43838	2	319
GO_REGULATION_OF_LYMPHOCYTE_APOPTOTIC_PROCESS	0.043659	0.19808	0.422019	1.43835	20	35
GSE15930_NAIVE_VS_48H_IN_VITRO_STIM_IL12_CD8_TCELL_DN	0.0118203	0.0954115	0.312999	1.43822	4	181
GO_RESPONSE_TO_METAL_ION	0.00684932	0.0755821	0.308745	1.4382	2	193
RUTELLA_RESPONSE_TO_HGF_UP	0.00454545	0.0613588	0.292552	1.43808	1	308
GSE21670_UNTREATED_VS_IL6_TREATED_STAT3_KO_CD4_TCELL_UP	0.0116279	0.0943137	0.3212	1.43799	4	148
GUENTHER_GROWTH_SPHERICAL_VS_ADHERENT_DN	0.0734694	0.267098	0.49268	1.43797	35	19
GARGALOVIC_RESPONSE_TO_OXIDIZED_PHOSPHOLIPIDS_GREY_DN	0.0545073	0.227255	0.447726	1.43766	25	29
LINDGREN_BLADDER_CANCER_CLUSTER_2B	0.00455581	0.0613588	0.306208	1.43753	1	213
ZHAN_MULTIPLE_MYELOMA_LB_DN	0.0581897	0.235879	0.437016	1.43727	26	32
CHARAFE_BREAST_CANCER_LUMINAL_VS_BASAL_DN	0.00669643	0.0755426	0.295598	1.4372	2	274
GSE24026_PD1_LIGATION_VS_CTRL_IN_ACT_TCELL_LINE_DN	0.00941176	0.084315	0.318186	1.4371	3	160
GO_METHYL_CPG_BINDING	0.0776892	0.274965	0.527715	1.43672	38	15
GO_LIPID_BINDING	0.00699301	0.0755821	0.287717	1.43631	2	357
GSE40666_NAIVE_VS_EFFECTOR_CD8_TCELL_WITH_IFNA_STIM_90MIN_DN	0.0113122	0.0943137	0.321615	1.43601	4	141
GO_SEGMENTATION	0.0441176	0.199361	0.41438	1.43596	20	37
GRAESSMANN_APOPTOSIS_BY_SERUM_DEPRIVATION_UP	0.00692841	0.0755821	0.287978	1.43592	2	341
GSE12392_WT_VS_IFNB_KO_CD8A_NEG_SPLEEN_DC_DN	0.00947867	0.0845746	0.318363	1.43585	3	159
GSE29618_BCELL_VS_MONOCYTE_DAY7_FLU_VACCINE_UP	0.0134529	0.103113	0.328617	1.43573	5	123
GSE24634_TEFF_VS_TCONV_DAY10_IN_CULTURE_DN	0.0115741	0.0943137	0.319296	1.43569	4	154
GSE21360_TERTIARY_VS_QUATERNARY_MEMORY_CD8_TCELL_UP	0.00717703	0.0756897	0.319519	1.43551	2	157
PID_RB_1PATHWAY	0.0222672	0.133881	0.379425	1.43527	10	54
KAN_RESPONSE_TO_ARSENIC_TRIOXIDE	0.0168067	0.114679	0.370844	1.43479	7	63
BROWNE_HCMV_INFECTION_30MIN_DN	0.0127119	0.0993695	0.353269	1.43473	5	78
GSE37301_COMMON_LYMPHOID_PROGENITOR_VS_GRAN_MONO_PROGENITOR_UP	0.0111111	0.0940291	0.323363	1.4347	4	133
GO_PRODUCTION_OF_MOLECULAR_MEDIATOR_OF_IMMUNE_RESPONSE	0.044898	0.201109	0.404353	1.43458	21	40
EBAUER_TARGETS_OF_PAX3_FOXO1_FUSION_DN	0.0809717	0.281324	0.46816	1.43358	39	22
V$TAL1ALPHAE47_01	0.0152838	0.109727	0.333649	1.43357	6	109
GO_NEGATIVE_REGULATION_OF_JNK_CASCADE	0.0809717	0.281324	0.468109	1.43342	39	22
GSE36888_UNTREATED_VS_IL2_TREATED_TCELL_17H_UP	0.0116279	0.0943137	0.320154	1.43331	4	148
GO_CELL_PROLIFERATION	0.00731707	0.0768781	0.28633	1.43319	2	389
GSE33425_CD161_HIGH_VS_INT_CD8_TCELL_UP	0.00714286	0.0755821	0.316141	1.43314	2	164
GSE32986_UNSTIM_VS_GMCSF_STIM_DC_DN	0.0115207	0.0943137	0.320184	1.43282	4	147
GO_NEGATIVE_REGULATION_OF_ACTIN_FILAMENT_DEPOLYMERIZATION	0.0773931	0.274325	0.484076	1.43257	37	20
OKUMURA_INFLAMMATORY_RESPONSE_LPS	0.0155902	0.110153	0.330591	1.43256	6	119
NABA_MATRISOME_ASSOCIATED	0.00915332	0.0838159	0.3066	1.43237	3	203
MUNSHI_MULTIPLE_MYELOMA_UP	0.0146444	0.105989	0.365191	1.43219	6	66
RAGHAVACHARI_PLATELET_SPECIFIC_GENES	0.0265306	0.148285	0.37515	1.43216	12	59
GSE40274_HELIOS_VS_FOXP3_AND_HELIOS_TRANSDUCED_ACTIVATED_CD4_TCELL_DN	0.0114679	0.0943137	0.320601	1.43211	4	142
GAUSSMANN_MLL_AF4_FUSION_TARGETS_A_DN	0.0625	0.243643	0.435436	1.43207	28	32
GSE29949_CD8_NEG_DC_SPLEEN_VS_CD8_POS_DC_SPLEEN_DN	0.0134228	0.103113	0.326163	1.43181	5	125
GSE27786_NEUTROPHIL_VS_MONO_MAC_DN	0.0116279	0.0943137	0.31847	1.43176	4	153
GSE339_EX_VIVO_VS_IN_CULTURE_CD4POS_DC_DN	0.0137615	0.103872	0.32003	1.43175	5	145
CAHOY_ASTROCYTIC	0.035124	0.17499	0.4006	1.43171	16	43
GSE21063_WT_VS_NFATC1_KO_BCELL_UP	0.012959	0.10083	0.334576	1.43159	5	104
BENPORATH_MYC_TARGETS_WITH_EBOX	0.0116279	0.0943137	0.31083	1.43158	4	180
GGGACCA,MIR-133A,MIR-133B	0.0157303	0.110675	0.322656	1.43144	6	134
GSE43955_TH0_VS_TGFB_IL6_TH17_ACT_CD4_TCELL_1H_UP	0.0115741	0.0943137	0.320483	1.43142	4	143
GSE14699_NAIVE_VS_DELETIONAL_TOLERANCE_CD8_TCELL_DN	0.0133038	0.102617	0.32535	1.43141	5	126
GSE339_EX_VIVO_VS_IN_CULTURE_CD4CD8DN_DC_DN	0.0137615	0.103872	0.319951	1.4314	5	145
GO_REGULATION_OF_CELLULAR_RESPONSE_TO_HEAT	0.0127119	0.0993695	0.36275	1.43122	5	67
V$AML_Q6	0.0159817	0.111622	0.322155	1.43106	6	137
GSE3920_UNTREATED_VS_IFNG_TREATED_ENDOTHELIAL_CELL_DN	0.00704225	0.0755821	0.314591	1.431	2	166
GSE15930_STIM_VS_STIM_AND_TRICHOSTATINA_72H_CD8_T_CELL_DN	0.0176991	0.118863	0.330689	1.4309	7	116
GSE5679_CTRL_VS_PPARG_LIGAND_ROSIGLITAZONE_AND_RARA_AGONIST_AM580_TREATED_DC_UP	0.0116279	0.0943137	0.319593	1.4308	4	148
GSE8621_UNSTIM_VS_LPS_PRIMED_AND_LPS_STIM_MACROPHAGE_DN	0.0137615	0.103872	0.319765	1.43056	5	145
GO_NEGATIVE_REGULATION_OF_KINASE_ACTIVITY	0.00699301	0.0755821	0.314604	1.43024	2	165
GO_TELOMERE_MAINTENANCE_VIA_TELOMERE_LENGTHENING	0.0897959	0.297946	0.463688	1.43023	43	23
BHATTACHARYA_EMBRYONIC_STEM_CELL	0.0191083	0.12205	0.367152	1.43021	8	65
CHARAFE_BREAST_CANCER_LUMINAL_VS_MESENCHYMAL_DN	0.00671141	0.0755426	0.293884	1.43003	2	278
GSE42021_CD24HI_VS_CD24INT_TCONV_THYMUS_UP	0.0137615	0.103872	0.322658	1.4298	5	136
GOLDRATH_NAIVE_VS_EFF_CD8_TCELL_UP	0.00959233	0.0851343	0.31407	1.42942	3	170
GSE36826_WT_VS_IL1R_KO_SKIN_DN	0.00941176	0.084315	0.316477	1.42939	3	160
LEE_AGING_NEOCORTEX_UP	0.0150538	0.108308	0.359103	1.42903	6	72
GO_RUFFLE_MEMBRANE	0.0262626	0.147962	0.376137	1.42867	12	55
RIZKI_TUMOR_INVASIVENESS_2D_UP	0.0292276	0.157501	0.391552	1.42856	13	48
GSE25123_CTRL_VS_ROSIGLITAZONE_STIM_PPARG_KO_MACROPHAGE_UP	0.0137615	0.103872	0.322366	1.4285	5	136
KLEIN_PRIMARY_EFFUSION_LYMPHOMA_DN	0.044898	0.201109	0.402461	1.42787	21	40
MARCHINI_TRABECTEDIN_RESISTANCE_DN	0.0646552	0.248319	0.44375	1.42704	29	30
GSE17721_12H_VS_24H_LPS_BMDC_UP	0.0115473	0.0943137	0.317226	1.42701	4	151
REACTOME_LIPID_DIGESTION_MOBILIZATION_AND_TRANSPORT	0.0809717	0.281324	0.465984	1.42692	39	22
GO_PROTEIN_LOCALIZATION_TO_NUCLEUS	0.0155902	0.110153	0.327229	1.42667	6	121
GO_NEGATIVE_REGULATION_OF_LEUKOCYTE_APOPTOTIC_PROCESS	0.0646552	0.248319	0.443616	1.42662	29	30
GGCAGCT,MIR-22	0.0140515	0.104366	0.318307	1.42655	5	149
E2F1_UP.V1_DN	0.0155902	0.110153	0.325174	1.42626	6	124
GSE3203_WT_VS_IFNAR1_KO_INFLUENZA_INFECTED_LN_BCELL_DN	0.0169492	0.115425	0.353319	1.42623	7	77
GO_POSITIVE_REGULATION_OF_NUCLEOCYTOPLASMIC_TRANSPORT	0.0103734	0.0902699	0.342679	1.42614	4	85
GO_LIPID_HOMEOSTASIS	0.0325203	0.16755	0.369943	1.42613	15	60
GO_S_ADENOSYLMETHIONINE_DEPENDENT_METHYLTRANSFERASE_ACTIVITY	0.0150215	0.108192	0.34013	1.42569	6	91
GSE360_DC_VS_MAC_L_DONOVANI_DN	0.0118765	0.0956143	0.314762	1.42565	4	163
GO_POSITIVE_REGULATION_OF_HEMOPOIESIS	0.0153173	0.109849	0.333713	1.42563	6	106
GSE360_L_DONOVANI_VS_M_TUBERCULOSIS_MAC_UP	0.0115741	0.0943137	0.319161	1.42551	4	143
GO_CHEMOKINE_ACTIVITY	0.0681363	0.255918	0.49691	1.42528	33	18
GSE39820_CTRL_VS_TGFBETA1_IL6_CD4_TCELL_UP	0.00950119	0.0845823	0.316426	1.42527	3	158
GO_REGULATION_OF_CHEMOKINE_PRODUCTION	0.0489796	0.212972	0.401694	1.42515	23	40
GO_CHEMICAL_HOMEOSTASIS	0.00468384	0.0613588	0.27983	1.42504	1	434
GO_REGULATION_OF_INTRACELLULAR_STEROID_HORMONE_RECEPTOR_SIGNALING_PATHWAY	0.0406504	0.189508	0.400647	1.42491	19	41
GSE11924_TH2_VS_TH17_CD4_TCELL_DN	0.0115741	0.0943137	0.319026	1.42491	4	143
GO_RESPONSE_TO_MOLECULE_OF_BACTERIAL_ORIGIN	0.00913242	0.0838159	0.303515	1.42444	3	216
GO_METAL_CLUSTER_BINDING	0.0262626	0.147962	0.375002	1.42436	12	55
GO_CELLULAR_RESPONSE_TO_OXYGEN_CONTAINING_COMPOUND	0.0023753	0.0395954	0.276833	1.42421	0	483
GO_N_ACETYLTRANSFERASE_ACTIVITY	0.0177384	0.118863	0.36273	1.42415	7	70
GO_OUTER_MEMBRANE	0.0109649	0.0931739	0.32051	1.42411	4	130
HALLMARK_P53_PATHWAY	0.0118483	0.0954648	0.315729	1.42397	4	159
GO_NEGATIVE_REGULATION_OF_PEPTIDYL_TYROSINE_PHOSPHORYLATION	0.0540541	0.226283	0.452854	1.4236	25	26
GSE43955_TH0_VS_TGFB_IL6_TH17_ACT_CD4_TCELL_4H_UP	0.0115473	0.0943137	0.31644	1.42347	4	151
GSE40443_INDUCED_VS_TOTAL_TREG_UP	0.0139535	0.104366	0.320914	1.42342	5	140
GSE37605_C57BL6_VS_NOD_FOXP3_IRES_GFP_TCONV_DN	0.0134529	0.103113	0.325777	1.42332	5	123
RYAAAKNNNNNNTTGW_UNKNOWN	0.0495868	0.214289	0.404948	1.42327	23	39
GO_NEGATIVE_REGULATION_OF_CELL_SUBSTRATE_ADHESION	0.0535332	0.225018	0.453031	1.4232	24	27
GO_MATERNAL_PROCESS_INVOLVED_IN_FEMALE_PREGNANCY	0.0646552	0.248319	0.442422	1.42278	29	30
INGRAM_SHH_TARGETS_DN	0.045738	0.203848	0.417355	1.42245	21	35
GSE24671_CTRL_VS_SENDAI_VIRUS_INFECTED_MOUSE_SPLENOCYTES_DN	0.00712589	0.0755821	0.312954	1.42236	2	167
GSE23502_BM_VS_COLON_TUMOR_MYELOID_DERIVED_SUPPRESSOR_CELL_UP	0.0115741	0.0943137	0.318437	1.42228	4	143
GSE35825_IFNA_VS_IFNG_STIM_MACROPHAGE_UP	0.0112108	0.0940439	0.323348	1.42199	4	128
GO_REGULATION_OF_LIPID_STORAGE	0.0556745	0.22987	0.452638	1.42196	25	27
BURTON_ADIPOGENESIS_PEAK_AT_16HR	0.0560166	0.230743	0.406241	1.42183	26	38
MORI_EMU_MYC_LYMPHOMA_BY_ONSET_TIME_DN	0.0831643	0.285347	0.513091	1.42145	40	16
GSE36888_UNTREATED_VS_IL2_TREATED_STAT5_AB_KNOCKIN_TCELL_6H_DN	0.00717703	0.0756897	0.316381	1.42141	2	157
GO_REGULATION_OF_ANOIKIS	0.0816733	0.282796	0.522077	1.42137	40	15
GSE24142_DN2_VS_DN3_THYMOCYTE_ADULT_DN	0.0159817	0.111622	0.319949	1.42126	6	137
ABRAHAM_ALPC_VS_MULTIPLE_MYELOMA_UP	0.0755102	0.270546	0.486898	1.42109	36	19
GSE43955_TH0_VS_TGFB_IL6_TH17_ACT_CD4_TCELL_4H_DN	0.0117925	0.095244	0.317252	1.42083	4	150
GO_POSITIVE_REGULATION_OF_CELLULAR_PROTEIN_LOCALIZATION	0.00677201	0.0755426	0.295266	1.42074	2	246
KIM_MYC_AMPLIFICATION_TARGETS_UP	0.0155556	0.110153	0.320151	1.42045	6	133
NOTCH_DN.V1_UP	0.0177384	0.118863	0.361785	1.42044	7	70
GSE360_L_DONOVANI_VS_B_MALAYI_HIGH_DOSE_MAC_UP	0.01766	0.118863	0.326833	1.42002	7	117
GO_MAMMARY_GLAND_DEVELOPMENT	0.0283401	0.154388	0.375349	1.41985	13	54
GO_NUCLEAR_PORE	0.0211416	0.129296	0.365566	1.41963	9	64
GSE9988_ANTI_TREM1_VS_VEHICLE_TREATED_MONOCYTES_UP	0.0137615	0.103872	0.320283	1.41927	5	136
KONDO_EZH2_TARGETS	0.0130435	0.10131	0.334895	1.41914	5	100
WILCOX_RESPONSE_TO_PROGESTERONE_DN	0.0607966	0.241292	0.441933	1.41906	28	29
TAGCTTT,MIR-9	0.0136986	0.103872	0.317119	1.419	5	146
GSE27670_BLIMP1_VS_LMP1_TRANSDUCED_GC_BCELL_UP	0.0116279	0.0943137	0.316925	1.41885	4	148
GO_ESTROGEN_RECEPTOR_BINDING	0.0646552	0.248319	0.441188	1.4188	29	30
GSE5542_UNTREATED_VS_IFNG_TREATED_EPITHELIAL_CELLS_24H_UP	0.015873	0.111444	0.319869	1.4187	6	135
GSE24634_IL4_VS_CTRL_TREATED_NAIVE_CD4_TCELL_DAY3_DN	0.0155556	0.110153	0.319725	1.41856	6	133
BREDEMEYER_RAG_SIGNALING_NOT_VIA_ATM_UP	0.0392562	0.186343	0.396806	1.41815	18	43
GO_REGULATION_OF_SEQUESTERING_OF_CALCIUM_ION	0.0143737	0.104983	0.373625	1.41812	6	56
MODULE_44	0.00688073	0.0755821	0.302288	1.41809	2	210
GNF2_CD33	0.0580913	0.235803	0.405162	1.41806	27	38
GO_RESPONSE_TO_ALKALOID	0.0177384	0.118863	0.361151	1.41795	7	70
GSE2770_IL12_AND_TGFB_ACT_VS_ACT_CD4_TCELL_48H_UP	0.0134529	0.103113	0.32241	1.41787	5	128
V$ZIC3_01	0.0155211	0.110153	0.326106	1.41768	6	120
GO_PROTEIN_REFOLDING	0.0872211	0.293759	0.511613	1.41736	42	16
GSE30083_SP1_VS_SP4_THYMOCYTE_DN	0.0179775	0.119489	0.319467	1.41729	7	134
GSE11386_NAIVE_VS_MEMORY_BCELL_DN	0.0155902	0.110153	0.323084	1.41709	6	124
GO_REGULATION_OF_PEPTIDYL_TYROSINE_PHOSPHORYLATION	0.0155902	0.110153	0.327005	1.41702	6	119
BILD_SRC_ONCOGENIC_SIGNATURE	0.0392562	0.186343	0.396469	1.41695	18	43
GSE33162_HDAC3_KO_VS_HDAC3_KO_MACROPHAGE_UP	0.0153173	0.109849	0.321268	1.41687	6	127
GSE14000_UNSTIM_VS_4H_LPS_DC_TRANSLATED_RNA_DN	0.0174672	0.118111	0.325109	1.4164	7	118
GSE8921_UNSTIM_0H_VS_TLR1_2_STIM_MONOCYTE_12H_DN	0.0183486	0.119948	0.318718	1.41625	7	139
GO_SOMATIC_RECOMBINATION_OF_IMMUNOGLOBULIN_GENE_SEGMENTS	0.0816327	0.282796	0.485167	1.41604	39	19
chr11q22	0.0814664	0.282503	0.478475	1.41599	39	20
GO_POSITIVE_REGULATION_OF_LEUKOCYTE_MIGRATION	0.0190678	0.121908	0.358859	1.41587	8	67
CATTGTYY_V$SOX9_B1	0.00923788	0.0840099	0.305209	1.41547	3	189
REACTOME_METAL_ION_SLC_TRANSPORTERS	0.0816733	0.282796	0.519813	1.41521	40	15
GO_PIGMENT_BIOSYNTHETIC_PROCESS	0.0689655	0.256725	0.430309	1.41521	31	32
GSE15930_NAIVE_VS_24H_IN_VITRO_STIM_IL12_CD8_TCELL_DN	0.00930233	0.0840099	0.305756	1.41481	3	188
GSE17721_LPS_VS_GARDIQUIMOD_2H_BMDC_UP	0.0137615	0.103872	0.319231	1.41461	5	136
ZHANG_TLX_TARGETS_36HR_DN	0.0119904	0.0960885	0.310733	1.41423	4	170
DEN_INTERACT_WITH_LCA5	0.0918164	0.301805	0.453042	1.41406	45	24
REACTOME_BASIGIN_INTERACTIONS	0.0792683	0.278198	0.503076	1.41358	38	17
GSE26343_UNSTIM_VS_LPS_STIM_NFAT5_KO_MACROPHAGE_DN	0.0118483	0.0954648	0.313351	1.41324	4	159
BONCI_TARGETS_OF_MIR15A_AND_MIR16_1	0.0246914	0.142779	0.370744	1.41323	11	57
GSE9988_LPS_VS_LPS_AND_ANTI_TREM1_MONOCYTE_DN	0.0159817	0.111622	0.318116	1.41312	6	137
GSE36078_UNTREATED_VS_AD5_T425A_HEXON_INF_MOUSE_LUNG_DC_UP	0.0155902	0.110153	0.322152	1.41301	6	124
GO_AMINO_ACID_TRANSMEMBRANE_TRANSPORTER_ACTIVITY	0.0589474	0.23725	0.420563	1.41293	27	34
GSE43955_TH0_VS_TGFB_IL6_TH17_ACT_CD4_TCELL_42H_UP	0.0138249	0.104056	0.315602	1.41232	5	147
GO_POSITIVE_REGULATION_OF_RESPONSE_TO_EXTERNAL_STIMULUS	0.0119904	0.0960885	0.31029	1.41221	4	170
LIANG_SILENCED_BY_METHYLATION_2	0.0631579	0.245064	0.444454	1.41218	29	28
CAMP_UP.V1_DN	0.0177384	0.118863	0.317772	1.4121	7	132
V$HNF4_DR1_Q3	0.0183486	0.119948	0.31786	1.41194	7	138
GSE9960_GRAM_NEG_VS_GRAM_NEG_AND_POS_SEPSIS_PBMC_UP	0.0165975	0.113787	0.339264	1.41193	7	85
GSE27786_NKCELL_VS_NKTCELL_DN	0.0134529	0.103113	0.323154	1.41186	5	123
GSE37532_TREG_VS_TCONV_PPARG_KO_CD4_TCELL_FROM_VISCERAL_ADIPOSE_TISSUE_UP	0.0138249	0.104056	0.315439	1.41159	5	147
CAIRO_PML_TARGETS_BOUND_BY_MYC_UP	0.078	0.275477	0.468501	1.41139	38	21
BHAT_ESR1_TARGETS_VIA_AKT1_UP	0.00952381	0.0845823	0.311341	1.41138	3	164
GO_ADP_BINDING	0.0582121	0.235879	0.44895	1.41133	27	26
KRAS.300_UP.V1_DN	0.0589474	0.23725	0.420012	1.41108	27	34
GSE28737_WT_VS_BCL6_KO_MARGINAL_ZONE_BCELL_UP	0.0147059	0.10609	0.344773	1.41082	6	79
GSE4590_SMALL_VS_LARGE_PRE_BCELL_UP	0.01566	0.110529	0.321336	1.41062	6	125
ELVIDGE_HYPOXIA_DN	0.0174672	0.118111	0.323742	1.41044	7	118
GSE17721_0.5H_VS_12H_CPG_BMDC_UP	0.014218	0.104697	0.308148	1.41042	5	173
V$PPARA_01	0.0781563	0.275675	0.491687	1.4103	38	18
GO_CARDIAC_MUSCLE_CELL_DIFFERENTIATION	0.0589474	0.23725	0.41978	1.4103	27	34
GO_MEMORY	0.0375	0.181857	0.397468	1.41017	17	42
GO_CELLULAR_CHEMICAL_HOMEOSTASIS	0.00671141	0.0755426	0.289962	1.40977	2	275
NGUYEN_NOTCH1_TARGETS_DN	0.0252101	0.144887	0.364316	1.40953	11	63
GO_MITOGEN_ACTIVATED_PROTEIN_KINASE_BINDING	0.078	0.275477	0.467875	1.4095	38	21
GSE6259_33D1_POS_VS_DEC205_POS_SPLENIC_DC_DN	0.0183486	0.119948	0.317238	1.40918	7	138
GSE45365_WT_VS_IFNAR_KO_CD8A_DC_DN	0.0136986	0.103872	0.314882	1.40899	5	146
V$AML1_Q6	0.0159817	0.111622	0.314787	1.40857	6	146
V$AML1_01	0.0159817	0.111622	0.314787	1.40857	6	146
ZHENG_BOUND_BY_FOXP3	0.00714286	0.0755821	0.282953	1.40855	2	351
GSE29618_BCELL_VS_MONOCYTE_DAY7_FLU_VACCINE_DN	0.0119048	0.0957464	0.309254	1.40829	4	169
MARZEC_IL2_SIGNALING_DN	0.0578158	0.235042	0.448278	1.40827	26	27
GO_FORMATION_OF_TRANSLATION_PREINITIATION_COMPLEX	0.0853659	0.290842	0.501144	1.40815	41	17
FAELT_B_CLL_WITH_VH3_21_UP	0.0571429	0.233085	0.396876	1.40805	27	40
GO_ENDOPLASMIC_RETICULUM_CALCIUM_ION_HOMEOSTASIS	0.0801603	0.279598	0.490887	1.40801	39	18
GSE17721_PAM3CSK4_VS_CPG_16H_BMDC_DN	0.0154867	0.110153	0.318658	1.40791	6	129
ZHAN_MULTIPLE_MYELOMA_CD2_DN	0.0689655	0.256725	0.428084	1.40789	31	32
HALLMARK_INFLAMMATORY_RESPONSE	0.0131579	0.102021	0.316855	1.40787	5	130
GSE19825_CD24LOW_VS_IL2RA_HIGH_DAY3_EFF_CD8_TCELL_DN	0.0119617	0.0959736	0.308265	1.40779	4	174
GO_TOLL_LIKE_RECEPTOR_SIGNALING_PATHWAY	0.0273109	0.151194	0.348822	1.40749	12	76
LIN_NPAS4_TARGETS_UP	0.0172414	0.116998	0.334517	1.40745	7	95
GSE3982_DC_VS_EFF_MEMORY_CD4_TCELL_UP	0.0180995	0.119489	0.315204	1.40738	7	141
GO_IN_UTERO_EMBRYONIC_DEVELOPMENT	0.00923788	0.0840099	0.302634	1.40713	3	197
GSE29949_CD8_NEG_DC_SPLEEN_VS_DC_BRAIN_DN	0.0180995	0.119489	0.315142	1.40711	7	141
GO_TRANSFERASE_ACTIVITY_TRANSFERRING_ONE_CARBON_GROUPS	0.0186047	0.120608	0.317189	1.40689	7	140
GO_ALPHA_AMINO_ACID_BIOSYNTHETIC_PROCESS	0.0343434	0.173153	0.3704	1.40688	16	55
GSE21063_3H_VS_16H_ANTI_IGM_STIM_NFATC1_KOBCELL_UP	0.0154867	0.110153	0.318407	1.4068	6	129
SHIPP_DLBCL_VS_FOLLICULAR_LYMPHOMA_DN	0.0602911	0.240356	0.447348	1.40629	28	26
GO_SIGNAL_TRANSDUCTION_BY_P53_CLASS_MEDIATOR	0.017094	0.116352	0.332782	1.40625	7	96
YAMAZAKI_TCEB3_TARGETS_UP	0.0198675	0.125587	0.327251	1.40624	8	110
GO_ERYTHROCYTE_DEVELOPMENT	0.0821643	0.283548	0.490261	1.40621	40	18
GSE9988_ANTI_TREM1_VS_ANTI_TREM1_AND_LPS_MONOCYTE_DN	0.0156951	0.110626	0.319742	1.40614	6	128
TACTTGA,MIR-26A,MIR-26B	0.00917431	0.0838159	0.302173	1.40612	3	198
GO_EXTRACELLULAR_MATRIX_COMPONENT	0.0688259	0.256725	0.446729	1.40607	33	25
CHANG_CORE_SERUM_RESPONSE_DN	0.0162037	0.112526	0.314805	1.40605	6	143
CATTTCA,MIR-203	0.00692841	0.0755821	0.302987	1.40584	2	190
GSE4984_GALECTIN1_VS_VEHICLE_CTRL_TREATED_DC_DN	0.013986	0.104366	0.312692	1.40582	5	155
GO_REGULATION_OF_RNA_STABILITY	0.0155902	0.110153	0.322367	1.40548	6	121
WILENSKY_RESPONSE_TO_DARAPLADIB	0.0602911	0.240356	0.44699	1.40517	28	26
GSE27786_CD4_VS_CD8_TCELL_DN	0.0138249	0.104056	0.314001	1.40515	5	147
SAFFORD_T_LYMPHOCYTE_ANERGY	0.034413	0.173153	0.371368	1.4048	16	54
GSE21678_WT_VS_FOXO1_FOXO3_KO_TREG_DN	0.0196507	0.124622	0.322388	1.40455	8	118
GO_REGULATION_OF_B_CELL_PROLIFERATION	0.0487805	0.212729	0.394864	1.40434	23	41
GSE17721_LPS_VS_GARDIQUIMOD_6H_BMDC_DN	0.0117371	0.0949689	0.309697	1.40428	4	162
MORF_ERH	0.0224719	0.134721	0.326131	1.40407	9	113
GSE21360_NAIVE_VS_QUATERNARY_MEMORY_CD8_TCELL_DN	0.0138889	0.104303	0.312255	1.40403	5	154
LEIN_LOCALIZED_TO_PROXIMAL_DENDRITES	0.10142	0.321507	0.506676	1.40368	49	16
V$SF1_Q6	0.016055	0.1119	0.313752	1.40366	6	145
GO_REGULATION_OF_HOMEOSTATIC_PROCESS	0.00672646	0.0755426	0.290926	1.40337	2	258
MODULE_12	0.0166271	0.113787	0.311492	1.40304	6	158
GSE21380_NON_TFH_VS_GERMINAL_CENTER_TFH_CD4_TCELL_DN	0.00950119	0.0845823	0.3087	1.40302	3	167
WIERENGA_STAT5A_TARGETS_GROUP1	0.0199557	0.125587	0.357343	1.403	8	70
GSE27786_LSK_VS_MONO_MAC_UP	0.0143541	0.104968	0.312282	1.40299	5	157
GERHOLD_ADIPOGENESIS_DN	0.034413	0.173153	0.38823	1.40298	16	45
GSE2770_UNTREATED_VS_IL12_TREATED_ACT_CD4_TCELL_48H_DN	0.0186047	0.120608	0.313371	1.40294	7	148
ZHONG_SECRETOME_OF_LUNG_CANCER_AND_FIBROBLAST	0.0237069	0.139621	0.328187	1.40293	10	103
GSE5589_LPS_VS_LPS_AND_IL6_STIM_IL6_KO_MACROPHAGE_45MIN_UP	0.013986	0.104366	0.312039	1.40289	5	155
TAKAO_RESPONSE_TO_UVB_RADIATION_DN	0.0189474	0.121492	0.340478	1.40284	8	82
SWEET_LUNG_CANCER_KRAS_DN	0.00688073	0.0755821	0.299038	1.40282	2	211
MODULE_81	0.0877551	0.294847	0.480571	1.40263	42	19
GSE17721_CPG_VS_GARDIQUIMOD_6H_BMDC_DN	0.00932401	0.0841489	0.308524	1.4026	3	165
GSE30083_SP1_VS_SP3_THYMOCYTE_UP	0.0183908	0.119989	0.313445	1.40257	7	144
HOXA9_DN.V1_UP	0.0140515	0.104366	0.312933	1.40247	5	149
GSE3920_UNTREATED_VS_IFNG_TREATED_FIBROBLAST_DN	0.0154867	0.110153	0.317409	1.40239	6	129
GO_SEX_DIFFERENTIATION	0.0158371	0.111251	0.321519	1.40216	6	122
GSE2585_AIRE_KO_VS_WT_CD80_LOW_MTEC_DN	0.016055	0.1119	0.313365	1.40193	6	145
MORF_BUB1B	0.0289855	0.156512	0.363444	1.4019	13	62
GSE1432_1H_VS_6H_IFNG_MICROGLIA_DN	0.0141509	0.104652	0.312999	1.40178	5	150
HALLMARK_ALLOGRAFT_REJECTION	0.0154867	0.110153	0.317202	1.40148	6	129
WALLACE_PROSTATE_CANCER_UP	0.0896414	0.297848	0.514742	1.40141	44	15
GO_HEAT_SHOCK_PROTEIN_BINDING	0.0199557	0.125587	0.356904	1.40128	8	70
GSE22886_TCELL_VS_BCELL_NAIVE_DN	0.0193133	0.123242	0.336808	1.40067	8	88
GO_MACROPHAGE_ACTIVATION	0.0870445	0.29355	0.457374	1.40055	42	22
GO_ION_ANTIPORTER_ACTIVITY	0.08	0.2793	0.464893	1.40052	39	21
BILBAN_B_CLL_LPL_UP	0.0487805	0.212729	0.393697	1.40019	23	41
GSE22611_UNSTIM_VS_2H_MDP_STIM_MUTANT_NOD2_TRANSDUCED_HEK293T_CELL_DN	0.0116279	0.0943137	0.304001	1.40012	4	180
GSE42021_CD24HI_TREG_VS_CD24HI_TCONV_THYMUS_DN	0.0186047	0.120608	0.312731	1.40008	7	148
GO_POSITIVE_REGULATION_OF_PEPTIDYL_TYROSINE_PHOSPHORYLATION	0.0186722	0.120648	0.336371	1.39989	8	85
GSE3920_UNTREATED_VS_IFNG_TREATED_ENDOTHELIAL_CELL_UP	0.0171306	0.116448	0.333308	1.39987	7	92
GO_CHANNEL_INHIBITOR_ACTIVITY	0.0861723	0.291608	0.488012	1.39976	42	18
GO_ISOPRENOID_METABOLIC_PROCESS	0.0342052	0.172979	0.372617	1.39963	16	52
GO_EMBRYO_DEVELOPMENT_ENDING_IN_BIRTH_OR_EGG_HATCHING	0.00689655	0.0755821	0.286414	1.39961	2	294
GSE30083_SP3_VS_SP4_THYMOCYTE_DN	0.0180995	0.119489	0.313449	1.39955	7	141
GSE2770_IL4_ACT_VS_ACT_CD4_TCELL_2H_DN	0.0165877	0.113787	0.310299	1.39948	6	159
GSE22886_NAIVE_VS_IGG_IGA_MEMORY_BCELL_DN	0.014218	0.104697	0.311451	1.39938	5	156
GO_SOMITE_DEVELOPMENT	0.0711207	0.261689	0.425482	1.39933	32	32
GSE24142_ADULT_VS_FETAL_DN2_THYMOCYTE_UP	0.0205479	0.12761	0.314986	1.39921	8	137
GARGALOVIC_RESPONSE_TO_OXIDIZED_PHOSPHOLIPIDS_YELLOW_DN	0.103448	0.324059	0.505053	1.39919	50	16
GSE40274_CTRL_VS_FOXP3_AND_PBX1_TRANSDUCED_ACTIVATED_CD4_TCELL_UP	0.0176991	0.118863	0.323321	1.39902	7	116
GO_PEPTIDYL_TYROSINE_DEPHOSPHORYLATION	0.0325203	0.16755	0.362905	1.39899	15	60
ODONNELL_TARGETS_OF_MYC_AND_TFRC_UP	0.0402414	0.18883	0.369901	1.3987	19	53
GO_DNA_MODIFICATION	0.034413	0.173153	0.375986	1.39867	16	51
CROONQUIST_NRAS_SIGNALING_UP	0.0665236	0.252269	0.429353	1.39847	30	31
GSE16450_IMMATURE_VS_MATURE_NEURON_CELL_LINE_DN	0.0182648	0.119948	0.312526	1.39845	7	146
GO_ACTIVATION_OF_IMMUNE_RESPONSE	0.00684932	0.0755821	0.287311	1.39839	2	283
MARIADASON_REGULATED_BY_HISTONE_ACETYLATION_UP	0.0342052	0.172979	0.372259	1.39828	16	52
GO_TRANSMEMBRANE_TRANSPORT	0.00480769	0.0616519	0.273391	1.39817	1	466
GO_PROTEIN_TYROSINE_PHOSPHATASE_ACTIVITY	0.0371134	0.180725	0.362373	1.39814	17	61
GSE13229_IMM_VS_INTMATURE_NKCELL_UP	0.0189474	0.121492	0.339303	1.398	8	82
GNF2_MCM5	0.0345528	0.173525	0.362565	1.39768	16	60
BILD_HRAS_ONCOGENIC_SIGNATURE	0.0162791	0.112815	0.310848	1.3975	6	153
GO_RENAL_SYSTEM_PROCESS	0.0602911	0.240356	0.409938	1.39718	28	35
GSE33424_CD161_HIGH_VS_INT_CD8_TCELL_UP	0.0165877	0.113787	0.309773	1.39711	6	159
BRACHAT_RESPONSE_TO_METHOTREXATE_DN	0.0890688	0.296859	0.456174	1.39688	43	22
GO_NEGATIVE_REGULATION_OF_SMOOTH_MUSCLE_CELL_PROLIFERATION	0.08	0.2793	0.463395	1.39601	39	21
KINSEY_TARGETS_OF_EWSR1_FLII_FUSION_DN	0.00923788	0.0840099	0.301003	1.39596	3	189
MALONEY_RESPONSE_TO_17AAG_UP	0.0644491	0.248089	0.443926	1.39553	30	26
GSE12963_UNINF_VS_ENV_AND_NEF_AND_VPR_DEFICIENT_HIV1_INF_CD4_TCELL_DN	0.0238095	0.139979	0.350014	1.39541	10	73
GSE7852_TREG_VS_TCONV_THYMUS_UP	0.0205479	0.12761	0.314127	1.3954	8	137
MISSIAGLIA_REGULATED_BY_METHYLATION_UP	0.0211416	0.129296	0.335398	1.39483	9	87
GSE32034_LY6C_HIGH_VS_LOW_ROSIGLIZATONE_TREATED_MONOCYTE_DN	0.0183486	0.119948	0.314736	1.39469	7	136
GSE6259_33D1_POS_VS_DEC205_POS_FLT3L_INDUCED_SPLENIC_DC_DN	0.013986	0.104366	0.310143	1.39437	5	155
GSE29618_BCELL_VS_PDC_DN	0.0166271	0.113787	0.309521	1.39416	6	158
GSE37301_COMMON_LYMPHOID_PROGENITOR_VS_RAG2_KO_NK_CELL_DN	0.0221239	0.133285	0.323861	1.39413	9	112
GSE30971_WBP7_HET_VS_KO_MACROPHAGE_2H_LPS_STIM_DN	0.0155902	0.110153	0.319754	1.39409	6	121
GUILLAUMOND_KLF10_TARGETS_DN	0.0979592	0.314642	0.451893	1.39385	47	23
GSE31622_WT_VS_KLF3_KO_BCELL_DN	0.0182648	0.119948	0.31147	1.39372	7	146
GSE9650_NAIVE_VS_EFF_CD8_TCELL_UP	0.0142518	0.104697	0.307704	1.39368	5	163
GO_HUMORAL_IMMUNE_RESPONSE	0.0402414	0.18883	0.368491	1.39337	19	53
V$COREBINDINGFACTOR_Q6	0.0180995	0.119489	0.312024	1.39319	7	141
GSE46242_CTRL_VS_EGR2_DELETED_ANERGIC_TH1_CD4_TCELL_DN	0.0199557	0.125587	0.316659	1.39318	8	126
GO_CARBOHYDRATE_TRANSPORT	0.0404858	0.189137	0.385478	1.39304	19	45
RODRIGUES_NTN1_AND_DCC_TARGETS	0.08	0.2793	0.462397	1.393	39	21
NOJIMA_SFRP2_TARGETS_DN	0.089613	0.297848	0.470625	1.39276	43	20
GSE5099_DAY3_VS_DAY7_MCSF_TREATED_MACROPHAGE_UP	0.0185185	0.120587	0.31178	1.39254	7	143
GSE12198_LOW_IL2_STIM_NK_CELL_VS_HIGH_IL2_STIM_NK_CELL_UP	0.0162413	0.11267	0.309435	1.39252	6	152
GO_CELLULAR_RESPONSE_TO_HORMONE_STIMULUS	0.00696056	0.0755821	0.283228	1.39249	2	320
GO_RIBOSOMAL_LARGE_SUBUNIT_ASSEMBLY	0.0890688	0.296859	0.45474	1.39248	43	22
GO_SOLUTE_PROTON_SYMPORTER_ACTIVITY	0.115619	0.345217	0.502401	1.39184	56	16
GSE19941_IL10_KO_VS_IL10_KO_AND_NFKBP50_KO_LPS_AND_IL10_STIM_MACROPHAGE_DN	0.0183486	0.119948	0.311087	1.39174	7	145
FLECHNER_PBL_KIDNEY_TRANSPLANT_OK_VS_DONOR_UP	0.0179775	0.119489	0.31369	1.39167	7	134
GO_EMBRYONIC_CRANIAL_SKELETON_MORPHOGENESIS	0.08	0.2793	0.461886	1.39146	39	21
CHIANG_LIVER_CANCER_SUBCLASS_UNANNOTATED_UP	0.0375783	0.182105	0.381367	1.39141	17	48
GSE3720_LPS_VS_PMA_STIM_VD2_GAMMADELTA_TCELL_DN	0.0221729	0.133467	0.354381	1.39137	9	70
AMIT_EGF_RESPONSE_240_HELA	0.0412371	0.191264	0.384503	1.39105	19	46
chr17q21	0.0199557	0.125587	0.31592	1.38992	8	126
GSE17721_LPS_VS_CPG_16H_BMDC_UP	0.0183486	0.119948	0.311114	1.38973	7	142
KIM_RESPONSE_TO_TSA_AND_DECITABINE_UP	0.0308008	0.162087	0.366141	1.38972	14	56
GO_CELLULAR_AMINO_ACID_BIOSYNTHETIC_PROCESS	0.0367347	0.179841	0.364028	1.3897	17	59
GSE14308_TH1_VS_TH17_DN	0.0210773	0.129197	0.310044	1.38952	8	149
GSE3920_IFNA_VS_IFNB_TREATED_ENDOTHELIAL_CELL_DN	0.0220751	0.133057	0.323356	1.3895	9	110
GSE22196_HEALTHY_VS_OBESE_MOUSE_SKIN_GAMMADELTA_TCELL_DN	0.0166271	0.113787	0.30567	1.38925	6	167
GO_FEMALE_SEX_DIFFERENTIATION	0.0425101	0.19485	0.367239	1.38918	20	54
GSE21927_UNTREATED_VS_GMCSF_IL6_TREATED_BONE_MARROW_DN	0.0217391	0.131685	0.332135	1.38907	9	94
GO_ENDOCYTOSIS	0.00913242	0.0838159	0.282593	1.38894	3	305
GSE360_HIGH_DOSE_B_MALAYI_VS_M_TUBERCULOSIS_MAC_DN	0.0134529	0.103113	0.317903	1.38892	5	123
GO_POSITIVE_REGULATION_OF_INTERLEUKIN_1_PRODUCTION	0.082	0.283178	0.461012	1.38883	40	21
V$PAX4_04	0.0262009	0.147962	0.32322	1.38876	11	109
GSE22229_UNTREATED_VS_IMMUNOSUPP_THERAPY_RENAL_TRANSPLANT_PATIENT_PBMC_UP	0.0239651	0.140395	0.32885	1.38873	10	99
GSE15330_HSC_VS_MEGAKARYOCYTE_ERYTHROID_PROGENITOR_DN	0.0218341	0.131961	0.318748	1.38868	9	118
BOYAULT_LIVER_CANCER_SUBCLASS_G3_UP	0.0143541	0.104968	0.30408	1.38867	5	174
GO_CENTRAL_NERVOUS_SYSTEM_NEURON_DEVELOPMENT	0.082	0.283178	0.460956	1.38866	40	21
GO_MONOCARBOXYLIC_ACID_BINDING	0.0748441	0.269314	0.441715	1.38858	35	26
GO_TISSUE_REMODELING	0.0569106	0.23235	0.39033	1.38822	27	41
GSE21360_NAIVE_VS_PRIMARY_MEMORY_CD8_TCELL_UP	0.0183486	0.119948	0.312392	1.38814	7	139
WEINMANN_ADAPTATION_TO_HYPOXIA_DN	0.089613	0.297848	0.469015	1.388	43	20
GSE31082_CD4_VS_CD8_SP_THYMOCYTE_DN	0.0180995	0.119489	0.310809	1.38776	7	141
GSE43955_1H_VS_20H_ACT_CD4_TCELL_UP	0.0138889	0.104303	0.306199	1.3873	5	161
V$LMO2COM_02	0.0218341	0.131961	0.318394	1.38714	9	118
SHAFFER_IRF4_MULTIPLE_MYELOMA_PROGRAM	0.0790021	0.277701	0.44123	1.38706	37	26
GSE18281_SUBCAPSULAR_CORTICAL_REGION_VS_WHOLE_CORTEX_THYMUS_DN	0.0215517	0.130668	0.329657	1.387	9	95
GO_REGULATION_OF_CHROMOSOME_ORGANIZATION	0.00917431	0.0838159	0.293767	1.38684	3	225
GSE37532_WT_VS_PPARG_KO_VISCERAL_ADIPOSE_TISSUE_TCONV_UP	0.0185185	0.120587	0.310411	1.38643	7	143
GSE30083_SP2_VS_SP3_THYMOCYTE_DN	0.023913	0.140341	0.327171	1.38641	10	100
GSE37533_PPARG1_FOXP3_VS_PPARG2_FOXP3_TRANSDUCED_CD4_TCELL_DN	0.0210773	0.129197	0.309338	1.38635	8	149
UDAYAKUMAR_MED1_TARGETS_DN	0.0143885	0.104983	0.304508	1.3859	5	170
GO_MUSCLE_SYSTEM_PROCESS	0.0264901	0.148285	0.31895	1.38577	11	117
GALLUZZI_PERMEABILIZE_MITOCHONDRIA	0.0630252	0.244833	0.399802	1.38544	29	37
ONDER_CDH1_TARGETS_1_DN	0.0198238	0.125423	0.32394	1.38536	8	108
GSE11973_MIR223_KOVS_WT_BONE_MARROW_NEUTROPHIL_DN	0.0206897	0.127846	0.309589	1.38531	8	144
GO_RNA_LOCALIZATION	0.0162413	0.11267	0.307826	1.38528	6	152
GSE33425_CD161_HIGH_VS_NEG_CD8_TCELL_UP	0.014218	0.104697	0.308301	1.38523	5	156
V$RP58_01	0.0211416	0.129296	0.334456	1.3849	9	84
GSE26890_CXCR1_NEG_VS_POS_EFFECTOR_CD8_TCELL_UP	0.0166271	0.113787	0.3046	1.38439	6	167
GO_REGULATION_OF_LEUKOCYTE_MIGRATION	0.0258065	0.14694	0.330825	1.38434	11	90
GSE3720_VD1_VS_VD2_GAMMADELTA_TCELL_UP	0.0155902	0.110153	0.317508	1.3843	6	121
GO_POSITIVE_REGULATION_OF_NEURON_DEATH	0.0342052	0.172979	0.375585	1.38428	16	49
MORF_CDH4	0.0797414	0.2793	0.420889	1.38423	36	32
GSE40443_INDUCED_VS_TOTAL_TREG_DN	0.0207373	0.127993	0.309317	1.3842	8	147
FUJII_YBX1_TARGETS_UP	0.097166	0.313412	0.452033	1.3842	47	22
GSE22045_TREG_VS_TCONV_DN	0.0215517	0.130668	0.328974	1.38413	9	95
BYSTRYKH_HEMATOPOIESIS_STEM_CELL_AND_BRAIN_QTL_TRANS	0.0175824	0.118531	0.311071	1.38399	7	131
GSE23568_CTRL_TRANSDUCED_VS_WT_CD8_TCELL_UP	0.0188679	0.121492	0.302648	1.3836	7	171
GSE42021_CD24HI_VS_CD24LOW_TREG_THYMUS_UP	0.0201794	0.126416	0.31455	1.3833	8	128
SCHLOSSER_MYC_TARGETS_AND_SERUM_RESPONSE_UP	0.0516529	0.219529	0.386997	1.38309	24	43
GSE15330_WT_VS_IKAROS_KO_LYMPHOID_MULTIPOTENT_PROGENITOR_DN	0.0165094	0.113787	0.308748	1.38274	6	150
GSE12392_IFNAR_KO_VS_IFNB_KO_CD8_NEG_SPLEEN_DC_DN	0.0205479	0.12761	0.308987	1.38261	8	146
GSE25123_WT_VS_PPARG_KO_MACROPHAGE_ROSIGLITAZONE_STIM_UP	0.0177384	0.118863	0.318026	1.38255	7	120
GO_DEAMINASE_ACTIVITY	0.0976096	0.314086	0.507779	1.38245	48	15
GSE22140_HEALTHY_VS_ARTHRITIC_MOUSE_CD4_TCELL_DN	0.018648	0.120608	0.301199	1.38243	7	176
GO_U2_TYPE_SPLICEOSOMAL_COMPLEX	0.0789474	0.277582	0.439195	1.38235	38	25
GSE22025_UNTREATED_VS_PROGESTERONE_TREATED_CD4_TCELL_UP	0.0235043	0.139066	0.327124	1.38234	10	96
GSE46606_UNSTIM_VS_CD40L_IL2_IL5_3DAY_STIMULATED_IRF4_KO_BCELL_DN	0.0199557	0.125587	0.314194	1.38233	8	126
GSE6566_STRONG_VS_WEAK_DC_STIMULATED_CD4_TCELL_UP	0.0264901	0.148285	0.352984	1.38222	11	69
GO_PROTEIN_PEPTIDYL_PROLYL_ISOMERIZATION	0.0732759	0.266684	0.429791	1.38215	33	30
GSE40666_UNTREATED_VS_IFNA_STIM_STAT1_KO_CD8_TCELL_90MIN_DN	0.0262009	0.147962	0.317249	1.38215	11	118
GO_NEGATIVE_REGULATION_OF_TELOMERE_MAINTENANCE_VIA_TELOMERE_LENGTHENING	0.123732	0.358751	0.498828	1.38194	60	16
GSE3337_CTRL_VS_4H_IFNG_IN_CD8POS_DC_DN	0.0166271	0.113787	0.306799	1.38191	6	158
SHAFFER_IRF4_TARGETS_IN_MYELOMA_VS_MATURE_B_LYMPHOCYTE	0.0186722	0.120648	0.331926	1.38139	8	85
GO_STEROID_BINDING	0.0661157	0.251721	0.392973	1.38119	31	39
GO_PHOSPHOLIPID_BINDING	0.0112867	0.0943137	0.294051	1.38118	4	219
GSE29618_MONOCYTE_VS_PDC_UP	0.0165877	0.113787	0.306242	1.38118	6	159
GO_POSITIVE_REGULATION_OF_ERK1_AND_ERK2_CASCADE	0.0299145	0.159723	0.346295	1.38115	13	74
GSE11961_FOLLICULAR_BCELL_VS_MEMORY_BCELL_DAY40_DN	0.023913	0.140341	0.33023	1.3811	10	94
SANSOM_APC_TARGETS	0.0290179	0.156624	0.320667	1.38079	12	115
TSENG_ADIPOGENIC_POTENTIAL_DN	0.0979592	0.314642	0.473075	1.38075	47	19
COLDREN_GEFITINIB_RESISTANCE_UP	0.0367347	0.179841	0.361662	1.38067	17	59
GO_CHOLESTEROL_HOMEOSTASIS	0.0642398	0.247716	0.439481	1.38063	29	27
GO_STEROL_HOMEOSTASIS	0.0642398	0.247716	0.439481	1.38063	29	27
ASTIER_INTEGRIN_SIGNALING	0.0661157	0.251721	0.392768	1.38046	31	39
GO_CELLULAR_TRANSITION_METAL_ION_HOMEOSTASIS	0.0342052	0.172979	0.374546	1.38045	16	49
GSE17721_POLYIC_VS_CPG_12H_BMDC_DN	0.016317	0.112902	0.307027	1.38035	6	155
GSE1925_CTRL_VS_24H_IFNG_STIM_MACROPHAGE_UP	0.0202247	0.126518	0.310947	1.37949	8	134
GO_CELLULAR_RESPONSE_TO_BIOTIC_STIMULUS	0.0156951	0.110626	0.315708	1.37933	6	123
GO_RNA_METHYLTRANSFERASE_ACTIVITY	0.0757895	0.271039	0.410505	1.37914	35	34
GNF2_HCK	0.0305011	0.160991	0.348394	1.37901	13	71
GSE39916_B_CELL_SPLEEN_VS_PLASMA_CELL_BONE_MARROW_DN	0.0199557	0.125587	0.313382	1.37876	8	126
GO_NEGATIVE_REGULATION_OF_STRESS_ACTIVATED_PROTEIN_KINASE_SIGNALING_CASCADE	0.0732759	0.266684	0.428724	1.37872	33	30
GO_NEGATIVE_REGULATION_OF_STRESS_ACTIVATED_MAPK_CASCADE	0.0732759	0.266684	0.428724	1.37872	33	30
GSE41978_ID2_KO_VS_BIM_KO_KLRG1_LOW_EFFECTOR_CD8_TCELL_UP	0.0206422	0.127701	0.310261	1.37867	8	139
HOFMANN_CELL_LYMPHOMA_DN	0.0810811	0.281532	0.438509	1.37851	38	26
SWEET_LUNG_CANCER_KRAS_UP	0.0143198	0.104832	0.27701	1.37822	5	353
GO_RUFFLE	0.0264901	0.148285	0.317199	1.37816	11	117
GSE3565_DUSP1_VS_WT_SPLENOCYTES_POST_LPS_INJECTION_UP	0.0208333	0.128231	0.308497	1.37788	8	143
GO_POSITIVE_REGULATION_OF_PHOSPHATASE_ACTIVITY	0.123732	0.358751	0.49729	1.37768	60	16
GSE26030_UNSTIM_VS_RESTIM_TH1_DAY15_POST_POLARIZATION_UP	0.0190024	0.121548	0.301397	1.37749	7	172
GO_MUSCLE_ADAPTATION	0.113821	0.342339	0.490214	1.37744	55	17
GSE37534_GW1929_VS_ROSIGLITAZONE_TREATED_CD4_TCELL_PPARG1_FOXP3_TRANSDUCED_UP	0.025974	0.147454	0.323592	1.37733	11	102
GSE23695_CD57_POS_VS_NEG_NK_CELL_UP	0.0140845	0.104366	0.302775	1.37726	5	166
ATGCAGT,MIR-217	0.0294118	0.158048	0.341228	1.37685	13	76
GO_CELLULAR_RESPONSE_TO_CAMP	0.0712788	0.261911	0.428724	1.37665	33	29
LI_LUNG_CANCER	0.075431	0.270481	0.428051	1.37656	34	30
GSE13485_DAY3_VS_DAY21_YF17D_VACCINE_PBMC_UP	0.0185615	0.120608	0.305853	1.3764	7	152
GSE27786_CD8_TCELL_VS_MONO_MAC_UP	0.0140845	0.104366	0.302555	1.37626	5	166
GSE22432_MULTIPOTENT_PROGENITOR_VS_CDC_DN	0.0165877	0.113787	0.305138	1.3762	6	159
GO_HEART_PROCESS	0.0714286	0.262173	0.397107	1.37611	33	37
GSE27859_MACROPHAGE_VS_CD11C_INT_F480_INT_DC_DN	0.0180995	0.119489	0.308196	1.37609	7	141
GSE4590_LARGE_PRE_BCELL_VS_VPREB_POS_LARGE_PRE_BCELL_DN	0.0243363	0.141917	0.317937	1.37573	10	116
GSE34515_CD16_NEG_MONOCYTE_VS_DC_DN	0.0166667	0.113907	0.303447	1.37559	6	164
GSE22886_NAIVE_BCELL_VS_BLOOD_PLASMA_CELL_DN	0.0142857	0.104697	0.302073	1.37559	5	169
GO_REGULATION_OF_INNATE_IMMUNE_RESPONSE	0.00674157	0.0755426	0.284862	1.37547	2	262
GSE30962_PRIMARY_VS_SECONDARY_CHRONIC_LCMV_INF_CD8_TCELL_DN	0.0264901	0.148285	0.316461	1.37495	11	117
GSE18791_CTRL_VS_NEWCASTLE_VIRUS_DC_14H_UP	0.0165877	0.113787	0.30206	1.3748	6	168
MODULE_5	0.00890869	0.0837676	0.284173	1.37477	3	266
LUI_THYROID_CANCER_PAX8_PPARG_DN	0.0681818	0.256017	0.391083	1.37454	32	39
GSE12392_WT_VS_IFNAR_KO_CD8A_NEG_SPLEEN_DC_UP	0.021327	0.130013	0.305851	1.37422	8	156
PID_CDC42_REG_PATHWAY	0.102041	0.321507	0.445512	1.37417	49	23
GSE22886_CTRL_VS_LPS_24H_DC_DN	0.0205479	0.12761	0.307094	1.37414	8	146
GSE32255_WT_UNSTIM_VS_JMJD2D_KNOCKDOWN_4H_LPS_STIM_DC_DN	0.0183486	0.119948	0.309289	1.37386	7	138
GO_ALPHA_AMINO_ACID_METABOLIC_PROCESS	0.0206422	0.127701	0.309179	1.37386	8	139
GSE11818_WT_VS_DICER_KO_TREG_DN	0.0178174	0.119243	0.313185	1.37368	7	124
GSE36888_UNTREATED_VS_IL2_TREATED_STAT5_AB_KNOCKIN_TCELL_17H_DN	0.0206422	0.127701	0.307495	1.37357	8	142
GSE6674_CPG_VS_PL2_3_STIM_BCELL_DN	0.0165877	0.113787	0.30178	1.37353	6	168
GO_CELLULAR_RESPONSE_TO_ESTROGEN_STIMULUS	0.092	0.301889	0.455898	1.37342	45	21
GSE15330_HSC_VS_MEGAKARYOCYTE_ERYTHROID_PROGENITOR_UP	0.0269663	0.150079	0.318978	1.37327	11	113
GSE5589_WT_VS_IL10_KO_LPS_STIM_MACROPHAGE_180MIN_UP	0.0175824	0.118531	0.30866	1.37326	7	131
GSE34515_CD16_NEG_VS_POS_MONOCYTE_DN	0.0205479	0.12761	0.306876	1.37317	8	146
GSE6259_BCELL_VS_CD8_TCELL_UP	0.0199557	0.125587	0.315825	1.37298	8	120
TTCYRGAA_UNKNOWN	0.0189125	0.121492	0.298801	1.37298	7	181
PENG_LEUCINE_DEPRIVATION_UP	0.0237581	0.139763	0.320851	1.37286	10	104
GSE44732_UNSTIM_VS_IL27_STIM_IMATURE_DC_UP	0.0180995	0.119489	0.307467	1.37284	7	141
GSE40277_EOS_AND_LEF1_TRANSDUCED_VS_CTRL_CD4_TCELL_DN	0.0166667	0.113907	0.302786	1.37259	6	164
CHOW_RASSF1_TARGETS_DN	0.082996	0.285292	0.436006	1.37231	40	25
GARY_CD5_TARGETS_DN	0.00724638	0.0763152	0.273886	1.3723	2	390
GO_REGULATION_OF_BLOOD_PRESSURE	0.0426829	0.195437	0.355937	1.37213	20	60
NAKAYAMA_FRA2_TARGETS	0.0854701	0.290924	0.413907	1.37213	39	33
GSE6269_FLU_VS_E_COLI_INF_PBMC_UP	0.0175824	0.118531	0.308395	1.37208	7	131
PROVENZANI_METASTASIS_DN	0.0299786	0.159874	0.32669	1.37207	13	92
GSE7548_NAIVE_VS_DAY7_PCC_IMMUNIZATION_CD4_TCELL_DN	0.0166271	0.113787	0.304616	1.37207	6	158
GSE28737_BCL6_HET_VS_BCL6_KO_MARGINAL_ZONE_BCELL_DN	0.0166271	0.113787	0.301868	1.37197	6	167
GO_ORGANIC_ACID_TRANSPORT	0.0222717	0.133881	0.316571	1.37181	9	119
V$LXR_Q3	0.0382294	0.183663	0.372195	1.37178	18	49
GO_RESPONSE_TO_BIOTIC_STIMULUS	0.004914	0.0629548	0.267481	1.37176	1	496
MULLIGHAN_MLL_SIGNATURE_1_DN	0.0206422	0.127701	0.308798	1.37169	8	138
BIOCARTA_CARM_ER_PATHWAY	0.0775862	0.274673	0.426497	1.37156	35	30
GSE4142_NAIVE_VS_GC_BCELL_UP	0.0264901	0.148285	0.315657	1.37146	11	117
GSE10325_CD4_TCELL_VS_MYELOID_UP	0.0287611	0.155741	0.316939	1.37141	12	116
GSE15330_LYMPHOID_MULTIPOTENT_VS_PRO_BCELL_DN	0.0167464	0.114394	0.305245	1.37137	6	157
REACTOME_CIRCADIAN_CLOCK	0.0702479	0.259764	0.39018	1.37137	33	39
GSE32255_WT_UNSTIM_VS_JMJD2D_KNOCKDOWN_4H_LPS_STIM_DC_UP	0.0208333	0.128231	0.307021	1.37129	8	143
GSE40068_CXCR5POS_BCL6POS_TFH_VS_CXCR5NEG_BCL6NEG_CD4_TCELL_DN	0.0204082	0.127254	0.30917	1.37125	8	135
GO_ACTIVATION_OF_INNATE_IMMUNE_RESPONSE	0.0163934	0.113314	0.299111	1.3711	6	175
GO_SYMPORTER_ACTIVITY	0.047619	0.209095	0.382937	1.37092	22	44
GSE7831_UNSTIM_VS_INFLUENZA_STIM_PDC_4H_DN	0.0230947	0.137285	0.304754	1.3709	9	151
GO_NEPHRON_DEVELOPMENT	0.0831601	0.285347	0.402163	1.37068	39	35
KRAS.600_UP.V1_DN	0.0299145	0.159723	0.343614	1.37046	13	74
GO_MYD88_DEPENDENT_TOLL_LIKE_RECEPTOR_SIGNALING_PATHWAY	0.0797414	0.2793	0.426106	1.3703	36	30
GSE2405_0H_VS_3H_A_PHAGOCYTOPHILUM_STIM_NEUTROPHIL_DN	0.047619	0.209095	0.382694	1.37005	22	44
GSE30971_CTRL_VS_LPS_STIM_MACROPHAGE_WBP7_KO_4H_DN	0.0197802	0.125231	0.307935	1.37003	8	131
GO_TRANSLATION_ELONGATION_FACTOR_ACTIVITY	0.129817	0.367628	0.494515	1.36999	63	16
GSE41867_NAIVE_VS_DAY15_LCMV_CONE13_EFFECTOR_CD8_TCELL_DN	0.0201794	0.126416	0.31152	1.36998	8	128
GSE17721_LPS_VS_PAM3CSK4_2H_BMDC_DN	0.0259179	0.147261	0.320153	1.36987	11	104
KEGG_NOD_LIKE_RECEPTOR_SIGNALING_PATHWAY	0.0382294	0.183663	0.371596	1.36957	18	49
GO_REGULATION_OF_NUCLEOTIDE_METABOLIC_PROCESS	0.0343348	0.173153	0.329185	1.36896	15	88
chr12p13	0.029661	0.158981	0.337039	1.36882	13	78
GSE34156_UNTREATED_VS_24H_NOD2_LIGAND_TREATED_MONOCYTE_DN	0.0235849	0.139321	0.305633	1.36879	9	150
GO_POSITIVE_REGULATION_OF_ACTIN_FILAMENT_BUNDLE_ASSEMBLY	0.0978044	0.314449	0.438498	1.36867	48	24
GO_RESPONSE_TO_TESTOSTERONE	0.101833	0.321507	0.462394	1.3684	49	20
GO_CIRCULATORY_SYSTEM_PROCESS	0.0205479	0.12761	0.305798	1.36834	8	146
GAZDA_DIAMOND_BLACKFAN_ANEMIA_PROGENITOR_DN	0.0503018	0.21633	0.361813	1.36812	24	53
GO_GLAND_MORPHOGENESIS	0.0746888	0.269276	0.390874	1.36805	35	38
GO_PROTEIN_IMPORT_INTO_NUCLEUS_TRANSLOCATION	0.092	0.301889	0.454038	1.36782	45	21
GSE10094_LCMV_VS_LISTERIA_IND_EFF_CD4_TCELL_DN	0.0377358	0.182274	0.340784	1.36772	17	75
GSE5542_UNTREATED_VS_IFNA_TREATED_EPITHELIAL_CELLS_6H_UP	0.0178174	0.119243	0.313684	1.36762	7	121
GSE27859_DC_VS_CD11C_INT_F480_HI_MACROPHAGE_UP	0.0165877	0.113787	0.300475	1.36759	6	168
GO_ION_TRANSMEMBRANE_TRANSPORT	0.00691244	0.0755821	0.277452	1.36758	2	325
SHEPARD_BMYB_MORPHOLINO_UP	0.0230415	0.137152	0.305547	1.36733	9	147
GO_ALDITOL_PHOSPHATE_METABOLIC_PROCESS	0.11022	0.336086	0.476698	1.36731	54	18
GSE27670_CTRL_VS_BLIMP1_TRANSDUCED_GC_BCELL_DN	0.0259179	0.147261	0.3195	1.36708	11	104
[truncated: 11,377 more rows]

## Sheet: 20954 CTX vs V
Supplementary Table 4c: GSEA comparing bone marrow macrophages from DFBL-20954 bearing mice treated with Cyclophosphamide (C ) or PBS (V). Positive enrichment scores indicate gene sets expressed higher in C as compared to PBS determined by the ordering of the rank ordered differential expression lists.
pathway	pval	padj	ES	NES	nMoreExtreme	size
KARLSSON_TGFB1_TARGETS_UP	0.00203252	0.0297383	0.643633	2.68862	0	102
BROWN_MYELOID_CELL_DEVELOPMENT_DN	0.00204499	0.0297383	0.612684	2.52667	0	94
GNF2_SPTB	0.00214133	0.0297383	0.671068	2.51202	0	57
GNF2_ANK1	0.00214133	0.0297383	0.671068	2.51202	0	57
GNF2_TAL1	0.00215983	0.0297383	0.671988	2.50644	0	58
GNF2_SPTA1	0.00206186	0.0297383	0.65991	2.50315	0	62
HALLMARK_HEME_METABOLISM	0.00211416	0.0297383	0.555636	2.4922	0	162
GSE3039_CD4_TCELL_VS_ALPHABETA_CD8_TCELL_DN	0.00213675	0.0297383	0.564389	2.48788	0	145
GSE24102_GRANULOCYSTIC_MDSC_VS_NEUTROPHIL_DN	0.00214592	0.0297383	0.566574	2.47108	0	138
GNF2_RAD23A	0.00212766	0.0297383	0.662855	2.4637	0	55
WANG_TARGETS_OF_MLL_CBP_FUSION_DN	0.00207039	0.0297383	0.689265	2.45638	0	43
GNF2_BNIP3L	0.00212766	0.0297383	0.656819	2.44127	0	55
TONKS_TARGETS_OF_RUNX1_RUNX1T1_FUSION_MONOCYTE_UP	0.00207039	0.0297383	0.543417	2.42492	0	157
YAO_TEMPORAL_RESPONSE_TO_PROGESTERONE_CLUSTER_11	0.00205339	0.0297383	0.598597	2.42039	0	86
SCHUHMACHER_MYC_TARGETS_UP	0.00204918	0.0297383	0.621651	2.42004	0	71
PAPASPYRIDONOS_UNSTABLE_ATEROSCLEROTIC_PLAQUE_UP	0.00206186	0.0297383	0.675819	2.41932	0	45
HALLMARK_MYC_TARGETS_V1	0.00215517	0.0297383	0.529631	2.41785	0	197
GSE21670_STAT3_KO_VS_WT_CD4_TCELL_DN	0.00210084	0.0297383	0.544193	2.41586	0	152
GSE6674_ANTI_IGM_VS_ANTI_IGM_AND_CPG_STIM_BCELL_DN	0.00212766	0.0297383	0.535085	2.40649	0	169
GNF2_PCAF	0.002	0.0297383	0.746128	2.40477	0	25
GNF2_CDC27	0.00208768	0.0297383	0.650063	2.38167	0	51
GNF2_PRDX2	0.002	0.0297383	0.737518	2.37702	0	25
GSE3039_CD4_TCELL_VS_B2_BCELL_DN	0.00210526	0.0297383	0.534048	2.36772	0	150
GNF2_MAP2K3	0.00208333	0.0297383	0.626206	2.36207	0	61
NADLER_OBESITY_UP	0.00207039	0.0297383	0.639349	2.34205	0	50
GSE21670_UNTREATED_VS_IL6_TREATED_STAT3_KO_CD4_TCELL_DN	0.0021322	0.0297383	0.519299	2.33306	0	170
IRITANI_MAD1_TARGETS_DN	0.00204082	0.0297383	0.644326	2.32897	0	46
GSE3039_NKT_CELL_VS_ALPHABETA_CD8_TCELL_DN	0.00212314	0.0297383	0.520068	2.32758	0	161
GSE43863_TH1_VS_TFH_MEMORY_CD4_TCELL_UP	0.00212766	0.0297383	0.517512	2.32746	0	169
GSE37532_TREG_VS_TCONV_CD4_TCELL_FROM_LN_UP	0.00209205	0.0297383	0.520925	2.31835	0	156
MENSSEN_MYC_TARGETS	0.00209205	0.0297383	0.628418	2.29136	0	49
GSE3039_NKT_CELL_VS_B2_BCELL_DN	0.00210526	0.0297383	0.524755	2.28957	0	135
GO_INTRINSIC_APOPTOTIC_SIGNALING_PATHWAY_BY_P53_CLASS_MEDIATOR	0.00210526	0.0297383	0.658001	2.27627	0	38
HALLMARK_MYC_TARGETS_V2	0.00214592	0.0297383	0.608502	2.26843	0	56
GO_RESPONSE_TO_ARSENIC_CONTAINING_SUBSTANCE	0.00196464	0.0297383	0.728522	2.26817	0	23
GSE22432_MULTIPOTENT_VS_COMMON_DC_PROGENITOR_UNTREATED_UP	0.00213675	0.0297383	0.497689	2.25698	0	181
GROSS_HYPOXIA_VIA_HIF1A_UP	0.00204082	0.0297383	0.578194	2.25236	0	69
GO_NEGATIVE_REGULATION_OF_NEURON_APOPTOTIC_PROCESS	0.00203666	0.0297383	0.570175	2.24697	0	75
LIAN_LIPA_TARGETS_6M	0.00214592	0.0297383	0.601438	2.2421	0	56
MULLIGAN_NTF3_SIGNALING_VIA_INSR_AND_IGF1R_UP	0.00199601	0.0297383	0.746066	2.24183	0	21
KEGG_PORPHYRIN_AND_CHLOROPHYLL_METABOLISM	0.00202429	0.0297383	0.692446	2.24095	0	26
GO_CHEMOKINE_MEDIATED_SIGNALING_PATHWAY	0.00206186	0.0297383	0.676408	2.23903	0	30
REACTOME_CHEMOKINE_RECEPTORS_BIND_CHEMOKINES	0.002	0.0297383	0.694556	2.23856	0	25
GO_REGULATION_OF_NEURON_DEATH	0.00210526	0.0297383	0.503535	2.23245	0	150
TAKEDA_TARGETS_OF_NUP98_HOXA9_FUSION_8D_UP	0.00208333	0.0297383	0.562615	2.23125	0	78
ALTEMEIER_RESPONSE_TO_LPS_WITH_MECHANICAL_VENTILATION	0.00204499	0.0297383	0.539663	2.22554	0	94
YAO_TEMPORAL_RESPONSE_TO_PROGESTERONE_CLUSTER_14	0.00215054	0.0297383	0.518958	2.22532	0	122
GO_NEGATIVE_REGULATION_OF_NEURON_DEATH	0.00206186	0.0297383	0.536904	2.22237	0	99
DAIRKEE_CANCER_PRONE_RESPONSE_BPA	0.00207039	0.0297383	0.620662	2.21189	0	43
GNF2_NS	0.00209205	0.0297383	0.630443	2.20937	0	40
WORSCHECH_TUMOR_REJECTION_UP	0.00206186	0.0297383	0.66598	2.20451	0	30
GO_RESPONSE_TO_IRON_ION	0.00199203	0.0297383	0.722219	2.2038	0	22
GSE34205_RSV_VS_FLU_INF_INFANT_PBMC_UP	0.00209644	0.0297383	0.553342	2.20255	0	79
GSE21774_CD56_BRIGHT_VS_DIM_CD62L_POSITIVE_NK_CELL_DN	0.00214133	0.0297383	0.503692	2.20094	0	132
GO_RESPONSE_TO_KETONE	0.0020284	0.0297383	0.526327	2.20091	0	103
MORF_UNG	0.00204918	0.0297383	0.563139	2.19759	0	72
GO_RESPONSE_TO_TYPE_I_INTERFERON	0.00206612	0.0297383	0.622608	2.19627	0	41
TAKEDA_TARGETS_OF_NUP98_HOXA9_FUSION_10D_UP	0.00210526	0.0297383	0.537644	2.19067	0	91
GSE32986_CURDLAN_LOWDOSE_VS_GMCSF_AND_CURDLAN_LOWDOSE_STIM_DC_DN	0.00210084	0.0297383	0.487276	2.19027	0	166
GSE6674_UNSTIM_VS_ANTI_IGM_AND_CPG_STIM_BCELL_DN	0.00212766	0.0297383	0.486411	2.18622	0	168
MORF_GSPT1	0.00206612	0.0297383	0.602216	2.18322	0	47
VALK_AML_CLUSTER_7	0.00204499	0.0297383	0.773541	2.1832	0	17
GSE40274_XBP1_VS_FOXP3_AND_XBP1_TRANSDUCED_ACTIVATED_CD4_TCELL_DN	0.00210526	0.0297383	0.491801	2.18042	0	150
SHEPARD_CRUSH_AND_BURN_MUTANT_UP	0.0021097	0.0297383	0.495711	2.17648	0	140
GSE7568_IL4_TGFB_DEXAMETHASONE_VS_IL4_TGFB_TREATED_MACROPHAGE_UP	0.00209644	0.0297383	0.490171	2.17551	0	149
LIAN_LIPA_TARGETS_3M	0.00207039	0.0297383	0.593787	2.17515	0	50
GO_IMPORT_INTO_CELL	0.00200803	0.0297383	0.742588	2.17343	0	19
GSE3982_EOSINOPHIL_VS_DC_DN	0.00207039	0.0297383	0.486717	2.17191	0	157
DIRMEIER_LMP1_RESPONSE_LATE_UP	0.00207039	0.0297383	0.592439	2.17021	0	50
GSE43863_NAIVE_VS_MEMORY_TFH_CD4_TCELL_D150_LCMV_DN	0.00209205	0.0297383	0.487517	2.16967	0	156
GSE369_IFNG_KO_VS_WT_LIVER_DN	0.00212766	0.0297383	0.482118	2.16692	0	168
KUROZUMI_RESPONSE_TO_ONCOCYTIC_VIRUS	0.00203666	0.0297383	0.661935	2.16267	0	27
GSE46606_UNSTIM_VS_CD40L_IL2_IL5_1DAY_STIMULATED_IRF4_KO_BCELL_UP	0.00208333	0.0297383	0.485113	2.16044	0	155
JACKSON_DNMT1_TARGETS_UP	0.00214133	0.0297383	0.574828	2.15176	0	57
GO_PORPHYRIN_CONTAINING_COMPOUND_METABOLIC_PROCESS	0.00204918	0.0297383	0.656669	2.15123	0	28
GO_INTRINSIC_APOPTOTIC_SIGNALING_PATHWAY_IN_RESPONSE_TO_DNA_DAMAGE_BY_P53_CLASS_MEDIATOR	0.002	0.0297383	0.6671	2.15007	0	25
GO_REGULATION_OF_NEURON_APOPTOTIC_PROCESS	0.0021097	0.0297383	0.510075	2.14996	0	113
GO_POSITIVE_REGULATION_OF_TELOMERASE_RNA_LOCALIZATION_TO_CAJAL_BODY	0.002	0.0297383	0.778913	2.14715	0	15
GO_REGULATION_OF_TELOMERASE_RNA_LOCALIZATION_TO_CAJAL_BODY	0.002	0.0297383	0.778913	2.14715	0	15
GO_RESPONSE_TO_DEXAMETHASONE	0.00199203	0.0297383	0.703582	2.14693	0	22
GSE17301_CTRL_VS_48H_ACD3_ACD28_IFNA2_STIM_CD8_TCELL_UP	0.0021097	0.0297383	0.47648	2.14233	0	172
GSE40274_CTRL_VS_FOXP3_AND_XBP1_TRANSDUCED_ACTIVATED_CD4_TCELL_UP	0.00210526	0.0297383	0.493704	2.14166	0	125
ABE_VEGFA_TARGETS_30MIN	0.00196078	0.0297383	0.760103	2.13692	0	16
KEGG_CYTOSOLIC_DNA_SENSING_PATHWAY	0.00209644	0.0297383	0.611732	2.13575	0	39
GSE43863_TH1_VS_LY6C_INT_CXCR5POS_MEMORY_CD4_TCELL_DN	0.00210526	0.0297383	0.522967	2.13087	0	91
PENG_GLUTAMINE_DEPRIVATION_DN	0.00212314	0.0297383	0.440162	2.12356	0	302
HESS_TARGETS_OF_HOXA9_AND_MEIS1_DN	0.002079	0.0297383	0.54911	2.12329	0	68
LEE_AGING_CEREBELLUM_UP	0.00208333	0.0297383	0.561944	2.11968	0	61
GSE9650_EFFECTOR_VS_MEMORY_CD8_TCELL_DN	0.00211864	0.0297383	0.471044	2.11791	0	171
GSE36891_UNSTIM_VS_POLYIC_TLR3_STIM_PERITONEAL_MACROPHAGE_UP	0.00203252	0.0297383	0.536781	2.11387	0	74
GSE3039_ALPHAALPHA_CD8_TCELL_VS_B1_BCELL_UP	0.00207039	0.0297383	0.473018	2.11078	0	157
WELCSH_BRCA1_TARGETS_DN	0.0021322	0.0297383	0.480598	2.09714	0	131
GSE43863_TH1_VS_LY6C_INT_CXCR5POS_MEMORY_CD4_TCELL_UP	0.00214133	0.0297383	0.46802	2.09507	0	165
GO_AMINO_ACID_BINDING	0.00204082	0.0297383	0.57826	2.09017	0	46
GSE6674_ANTI_IGM_VS_CPG_STIM_BCELL_DN	0.00211416	0.0297383	0.465272	2.08689	0	162
GO_RESPONSE_TO_VIRUS	0.00210084	0.0297383	0.467284	2.08683	0	158
GO_POSITIVE_REGULATION_OF_T_CELL_MEDIATED_IMMUNITY	0.00204499	0.0297383	0.737755	2.0822	0	17
GSE24634_TREG_VS_TCONV_POST_DAY10_IL4_CONVERSION_DN	0.00207039	0.0297383	0.466559	2.08195	0	157
MODULE_355	0.00196464	0.0297383	0.667862	2.07931	0	23
BILD_MYC_ONCOGENIC_SIGNATURE	0.00212766	0.0297383	0.473484	2.07604	0	141
GSE3039_B2_VS_B1_BCELL_UP	0.0021097	0.0297383	0.472752	2.07568	0	140
GO_CELLULAR_RESPONSE_TO_DEXAMETHASONE_STIMULUS	0.00200803	0.0297383	0.707921	2.07197	0	19
ONGUSAHA_TP53_TARGETS	0.00204918	0.0297383	0.631884	2.07003	0	28
MOSERLE_IFNA_RESPONSE	0.00201207	0.0297383	0.699213	2.06682	0	20
GSE34156_TLR1_TLR2_LIGAND_VS_NOD2_AND_TLR1_TLR2_LIGAND_24H_TREATED_MONOCYTE_UP	0.00215054	0.0297383	0.468636	2.06657	0	146
WANG_IMMORTALIZED_BY_HOXA9_AND_MEIS1_DN	0.00201207	0.0297383	0.699024	2.06627	0	20
GSE29618_MONOCYTE_VS_MDC_DN	0.00215983	0.0297383	0.470981	2.06601	0	143
GO_RRNA_MODIFICATION	0.00196464	0.0297383	0.663296	2.0651	0	23
REACTOME_CYTOSOLIC_TRNA_AMINOACYLATION	0.0019685	0.0297383	0.654173	2.06279	0	24
GSE17721_ALL_VS_24H_PAM3CSK4_BMDC_UP	0.00209205	0.0297383	0.462735	2.05938	0	156
GSE22140_GERMFREE_VS_SPF_ARTHRITIC_MOUSE_CD4_TCELL_UP	0.00214133	0.0297383	0.467028	2.05281	0	144
GSE37532_TREG_VS_TCONV_PPARG_KO_CD4_TCELL_FROM_LN_DN	0.00212766	0.0297383	0.456422	2.05143	0	168
GO_DEFENSE_RESPONSE_TO_VIRUS	0.0020284	0.0297383	0.493919	2.05067	0	98
REACTOME_INTERFERON_ALPHA_BETA_SIGNALING	0.00209644	0.0297383	0.587056	2.0496	0	39
CHANGOLKAR_H2AFY_TARGETS_DN	0.00203666	0.0297383	0.625995	2.04525	0	27
GO_PIGMENT_METABOLIC_PROCESS	0.00209205	0.0297383	0.58359	2.04517	0	40
GSE37301_MULTIPOTENT_PROGENITOR_VS_GRAN_MONO_PROGENITOR_UP	0.00215054	0.0297383	0.470564	2.04223	0	130
PID_MYC_ACTIV_PATHWAY	0.00204918	0.0297383	0.524193	2.04065	0	71
MORI_SMALL_PRE_BII_LYMPHOCYTE_DN	0.00204918	0.0297383	0.521141	2.03369	0	72
GO_HEME_METABOLIC_PROCESS	0.0019685	0.0297383	0.644812	2.03328	0	24
MODULE_488	0.00200803	0.0297383	0.694199	2.0318	0	19
GO_NEUTRAL_AMINO_ACID_TRANSPORT	0.00196078	0.0297383	0.722242	2.03048	0	16
GO_INTRINSIC_APOPTOTIC_SIGNALING_PATHWAY_IN_RESPONSE_TO_DNA_DAMAGE	0.00214592	0.0297383	0.544621	2.03029	0	56
GO_POSITIVE_REGULATION_OF_PROTEIN_LOCALIZATION_TO_NUCLEUS	0.00210526	0.0297383	0.498077	2.02945	0	91
MODULE_160	0.002	0.0297383	0.734526	2.02479	0	15
GO_RESPONSE_TO_CORTICOSTEROID	0.00204499	0.0297383	0.490717	2.02369	0	94
GSE5542_IFNA_VS_IFNA_AND_IFNG_TREATED_EPITHELIAL_CELLS_24H_UP	0.00214592	0.0297383	0.467329	2.02357	0	127
MARKEY_RB1_CHRONIC_LOF_DN	0.00210084	0.0297383	0.507454	2.02229	0	81
PENG_RAPAMYCIN_RESPONSE_DN	0.00210084	0.0297383	0.434059	2.02208	0	220
SHIPP_DLBCL_VS_FOLLICULAR_LYMPHOMA_UP	0.00207039	0.0297383	0.565148	2.01405	0	43
GSE19198_1H_VS_6H_IL21_TREATED_TCELL_DN	0.00211416	0.0297383	0.448649	2.01233	0	162
CROONQUIST_STROMAL_STIMULATION_UP	0.00209205	0.0297383	0.583814	2.01089	0	37
GO_LYMPHOCYTE_MIGRATION	0.00200803	0.0297383	0.68674	2.00997	0	19
GSE369_SOCS3_KO_VS_WT_LIVER_UP	0.00210526	0.0297383	0.445984	2.00989	0	173
SCHUETZ_BREAST_CANCER_DUCTAL_INVASIVE_UP	0.00211864	0.0297383	0.446999	2.0098	0	171
GAURNIER_PSMD4_TARGETS	0.00205761	0.0297383	0.60321	2.0094	0	32
GO_OSTEOBLAST_DIFFERENTIATION	0.00204918	0.0297383	0.516114	2.0092	0	71
GO_CYTOKINE_RECEPTOR_ACTIVITY	0.00206612	0.0297383	0.569569	2.00917	0	41
UROSEVIC_RESPONSE_TO_IMIQUIMOD	0.002	0.0297383	0.728295	2.00762	0	15
BERTUCCI_INVASIVE_CARCINOMA_DUCTAL_VS_LOBULAR_DN	0.00196464	0.0297383	0.644557	2.00676	0	23
OSWALD_HEMATOPOIETIC_STEM_CELL_IN_COLLAGEN_GEL_UP	0.00210526	0.0297383	0.445117	2.00599	0	173
APPIERTO_RESPONSE_TO_FENRETINIDE_UP	0.00199203	0.0297383	0.656293	2.00263	0	22
GSE23502_WT_VS_HDC_KO_MYELOID_DERIVED_SUPPRESSOR_CELL_BM_DN	0.0021097	0.0297383	0.447467	2.00103	0	160
COLLER_MYC_TARGETS_UP	0.00196464	0.0297383	0.642514	2.0004	0	23
GSE21360_PRIMARY_VS_QUATERNARY_MEMORY_CD8_TCELL_UP	0.00210084	0.0297383	0.449929	1.99739	0	152
HELLER_HDAC_TARGETS_DN	0.00211864	0.0297383	0.431297	1.99675	0	215
GNF2_RAN	0.002079	0.0297383	0.494985	1.99415	0	84
GSE22140_HEALTHY_VS_ARTHRITIC_GERMFREE_MOUSE_CD4_TCELL_DN	0.00211416	0.0297383	0.444532	1.99386	0	162
MORF_PCNA	0.00210084	0.0297383	0.500278	1.99369	0	81
GSE22140_GERMFREE_VS_SPF_MOUSE_CD4_TCELL_DN	0.00210084	0.0297383	0.443527	1.99362	0	166
GSE9960_GRAM_POS_VS_GRAM_NEG_AND_POS_SEPSIS_PBMC_UP	0.00218341	0.0297383	0.440108	1.99075	0	182
GO_RESPONSE_TO_PURINE_CONTAINING_COMPOUND	0.00205761	0.0297383	0.482311	1.99053	0	95
REACTOME_TRNA_AMINOACYLATION	0.00209205	0.0297383	0.567538	1.98892	0	40
MODULE_299	0.00206612	0.0297383	0.604029	1.98752	0	29
MODULE_223	0.002079	0.0297383	0.503625	1.98732	0	76
GSE25123_WT_VS_PPARG_KO_MACROPHAGE_IL4_STIM_DN	0.00212766	0.0297383	0.452235	1.98666	0	142
GO_RNA_STABILIZATION	0.002	0.0297383	0.615875	1.98497	0	25
SNF5_DN.V1_UP	0.00210526	0.0297383	0.465198	1.98467	0	116
GO_REGULATION_OF_NF_KAPPAB_IMPORT_INTO_NUCLEUS	0.00205761	0.0297383	0.595351	1.98322	0	32
RAMALHO_STEMNESS_UP	0.00215517	0.0297383	0.440392	1.9828	0	176
GSE339_CD4POS_VS_CD8POS_DC_DN	0.0021097	0.0297383	0.443316	1.98247	0	160
GO_ADAPTIVE_IMMUNE_RESPONSE_BASED_ON_SOMATIC_RECOMBINATION_OF_IMMUNE_RECEPTORS_BUILT_FROM_IMMUNOGLOBULIN_SUPERFAMILY_DOMAINS	0.00204082	0.0297383	0.505325	1.9819	0	73
GO_LYMPHOCYTE_ACTIVATION	0.00215054	0.0297383	0.42478	1.98027	0	226
GO_AMINO_ACID_ACTIVATION	0.00209205	0.0297383	0.542437	1.97785	0	49
GO_TRNA_AMINOACYLATION	0.00209205	0.0297383	0.542437	1.97785	0	49
CHIARADONNA_NEOPLASTIC_TRANSFORMATION_KRAS_CDC25_DN	0.00202429	0.0297383	0.609054	1.97107	0	26
GO_PRERIBOSOME	0.00212766	0.0297383	0.530291	1.97099	0	55
MORF_FEN1	0.0020284	0.0297383	0.515231	1.96991	0	63
GO_HOMOPHILIC_CELL_ADHESION_VIA_PLASMA_MEMBRANE_ADHESION_MOLECULES	0.002	0.0297383	0.610804	1.96862	0	25
GRAHAM_CML_QUIESCENT_VS_NORMAL_DIVIDING_UP	0.002079	0.0297383	0.573417	1.96829	0	36
GSE18281_CORTICAL_VS_MEDULLARY_THYMOCYTE_UP	0.00210526	0.0297383	0.443858	1.96786	0	150
GSE34006_WT_VS_A2AR_KO_TREG_DN	0.00212766	0.0297383	0.448735	1.96752	0	141
GO_REGULATION_OF_PROTEIN_LOCALIZATION_TO_NUCLEUS	0.00210084	0.0297383	0.443115	1.96714	0	152
GROSS_ELK3_TARGETS_UP	0.00392157	0.0468079	0.699662	1.967	1	16
GO_SNORNA_BINDING	0.00202429	0.0297383	0.607493	1.96602	0	26
LEF1_UP.V1_UP	0.00203666	0.0297383	0.498567	1.96478	0	75
GSE27241_CTRL_VS_DIGOXIN_TREATED_CD4_TCELL_IN_TH17_POLARIZING_CONDITIONS_DN	0.00214133	0.0297383	0.449575	1.96447	0	132
REACTOME_TRANSPORT_OF_GLUCOSE_AND_OTHER_SUGARS_BILE_SALTS_AND_ORGANIC_ACIDS_METAL_IONS_AND_AMINE_COMPOUNDS	0.00203252	0.0297383	0.5822	1.96175	0	33
MORF_FBL	0.00210526	0.0297383	0.449557	1.96147	0	135
GSE46606_UNSTIM_VS_CD40L_IL2_IL5_DAY3_STIMULATED_BCELL_DN	0.00209644	0.0297383	0.441371	1.95892	0	149
P53_DN.V1_DN	0.00205761	0.0297383	0.474267	1.95733	0	95
GSE26030_TH1_VS_TH17_DAY5_POST_POLARIZATION_UP	0.00212766	0.0297383	0.446381	1.95721	0	141
COLIN_PILOCYTIC_ASTROCYTOMA_VS_GLIOBLASTOMA_DN	0.00200803	0.0297383	0.66851	1.95662	0	19
DORN_ADENOVIRUS_INFECTION_48HR_DN	0.00203666	0.0297383	0.598158	1.9543	0	27
GSE17974_CTRL_VS_ACT_IL4_AND_ANTI_IL12_4H_CD4_TCELL_DN	0.0021322	0.0297383	0.442682	1.95376	0	147
SCHLOSSER_MYC_TARGETS_AND_SERUM_RESPONSE_DN	0.00204082	0.0297383	0.54022	1.95267	0	46
GO_NEUTRAL_AMINO_ACID_TRANSMEMBRANE_TRANSPORTER_ACTIVITY	0.002	0.0297383	0.708192	1.9522	0	15
GARGALOVIC_RESPONSE_TO_OXIDIZED_PHOSPHOLIPIDS_MAGENTA_UP	0.00199601	0.0297383	0.649019	1.95021	0	21
GO_CYTOKINE_MEDIATED_SIGNALING_PATHWAY	0.00210526	0.0297383	0.413044	1.94935	0	248
GSE6674_ANTI_IGM_VS_PL2_3_STIM_BCELL_DN	0.00212314	0.0297383	0.432569	1.94836	0	174
GSE411_100MIN_VS_400MIN_IL6_STIM_MACROPHAGE_DN	0.0021322	0.0297383	0.433659	1.94831	0	170
ADDYA_ERYTHROID_DIFFERENTIATION_BY_HEMIN	0.00214133	0.0297383	0.52004	1.94667	0	57
V$MYCMAX_01	0.00209205	0.0297383	0.437407	1.94666	0	156
MANALO_HYPOXIA_DN	0.00211416	0.0297383	0.410846	1.94591	0	259
SERVITJA_ISLET_HNF1A_TARGETS_UP	0.00204918	0.0297383	0.504064	1.94569	0	67
GSE19941_LPS_VS_LPS_AND_IL10_STIM_IL10_KO_NFKBP50_KO_MACROPHAGE_UP	0.00214133	0.0297383	0.450413	1.94543	0	124
REACTOME_TRANSPORT_OF_INORGANIC_CATIONS_ANIONS_AND_AMINO_ACIDS_OLIGOPEPTIDES	0.002079	0.0297383	0.5654	1.94077	0	36
GSE41867_DAY6_VS_DAY8_LCMV_ARMSTRONG_EFFECTOR_CD8_TCELL_DN	0.0021322	0.0297383	0.431622	1.93916	0	170
GSE1925_CTRL_VS_3H_IFNG_STIM_MACROPHAGE_UP	0.00208333	0.0297383	0.435395	1.93902	0	155
WORSCHECH_TUMOR_EVASION_AND_TOLEROGENICITY_UP	0.00204499	0.0297383	0.686918	1.93872	0	17
MODULE_121	0.00211416	0.0297383	0.527582	1.93868	0	52
GNF2_NPM1	0.00204918	0.0297383	0.50193	1.93745	0	67
MODULE_245	0.002	0.0297383	0.600793	1.93636	0	25
ELVIDGE_HIF1A_AND_HIF2A_TARGETS_UP	0.00206612	0.0297383	0.58807	1.93501	0	29
GO_LYMPHOCYTE_ACTIVATION_INVOLVED_IN_IMMUNE_RESPONSE	0.00206186	0.0297383	0.510058	1.93474	0	62
MODULE_345	0.00206186	0.0297383	0.509989	1.93448	0	62
VECCHI_GASTRIC_CANCER_ADVANCED_VS_EARLY_UP	0.00206612	0.0297383	0.505133	1.93412	0	65
GSE16385_ROSIGLITAZONE_IL4_VS_IL4_ALONE_STIM_MACROPHAGE_12H_UP	0.00209205	0.0297383	0.434417	1.93335	0	156
PENG_LEUCINE_DEPRIVATION_DN	0.0021097	0.0297383	0.429866	1.93274	0	172
VALK_AML_CLUSTER_5	0.00199203	0.0297383	0.633379	1.93272	0	22
GO_RESPONSE_TO_INTERFERON_GAMMA	0.00204918	0.0297383	0.500549	1.93212	0	67
BURTON_ADIPOGENESIS_PEAK_AT_8HR	0.00206186	0.0297383	0.578221	1.93147	0	31
GSE36476_CTRL_VS_TSST_ACT_16H_MEMORY_CD4_TCELL_YOUNG_DN	0.00210084	0.0297383	0.432434	1.9312	0	158
GSE3039_ALPHABETA_CD8_TCELL_VS_B1_BCELL_DN	0.002079	0.0297383	0.434146	1.93113	0	154
MONNIER_POSTRADIATION_TUMOR_ESCAPE_UP	0.0021097	0.0297383	0.398583	1.93094	0	308
GO_SOMATIC_RECOMBINATION_OF_IMMUNOGLOBULIN_GENE_SEGMENTS	0.00200803	0.0297383	0.659613	1.93058	0	19
REACTOME_ASSOCIATION_OF_TRIC_CCT_WITH_TARGET_PROTEINS_DURING_BIOSYNTHESIS	0.00202429	0.0297383	0.596325	1.92987	0	26
WONG_ADULT_TISSUE_STEM_MODULE	0.00221239	0.0297993	0.390665	1.92979	0	406
JUBAN_TARGETS_OF_SPI1_AND_FLI1_DN	0.00204082	0.0297383	0.491958	1.92948	0	73
GSE10240_IL22_VS_IL22_AND_IL17_STIM_PRIMARY_BRONCHIAL_EPITHELIAL_CELLS_DN	0.00214133	0.0297383	0.446501	1.92853	0	124
GSE4748_CTRL_VS_CYANOBACTERIUM_LPSLIKE_STIM_DC_3H_DN	0.0021322	0.0297383	0.429113	1.92789	0	170
GO_RESPONSE_TO_ORGANOPHOSPHORUS	0.00209644	0.0297383	0.484299	1.92773	0	79
GO_LYMPHOCYTE_MEDIATED_IMMUNITY	0.0020284	0.0297383	0.503982	1.9269	0	63
GSE45365_NK_CELL_VS_CD11B_DC_DN	0.00209644	0.0297383	0.430774	1.92657	0	159
GSE29618_MONOCYTE_VS_MDC_DAY7_FLU_VACCINE_DN	0.00210526	0.0297383	0.433957	1.92397	0	150
GO_CELLULAR_RESPONSE_TO_CYTOKINE_STIMULUS	0.0021692	0.0297383	0.394456	1.92219	0	341
WELCH_GATA1_TARGETS	0.00200803	0.0297383	0.656387	1.92114	0	19
LINDSTEDT_DENDRITIC_CELL_MATURATION_A	0.00209205	0.0297383	0.52607	1.91818	0	49
GSE22432_MULTIPOTENT_VS_COMMON_DC_PROGENITOR_UNTREATED_DN	0.00210526	0.0297383	0.423327	1.91782	0	178
GO_MYELIN_SHEATH	0.00212314	0.0297383	0.451786	1.91762	0	115
HENDRICKS_SMARCA4_TARGETS_UP	0.002079	0.0297383	0.558429	1.91684	0	36
GSE22886_DAY0_VS_DAY1_MONOCYTE_IN_CULTURE_DN	0.00212314	0.0297383	0.427764	1.91447	0	161
GO_B_CELL_MEDIATED_IMMUNITY	0.00209205	0.0297383	0.555283	1.91262	0	37
MORF_RAD54L	0.0020284	0.0297383	0.460259	1.91092	0	98
MYC_UP.V1_UP	0.00208333	0.0297383	0.454342	1.91027	0	110
MODULE_155	0.0019685	0.0297383	0.605354	1.90885	0	24
MORF_DEAF1	0.0021322	0.0297383	0.517232	1.9067	0	53
GSE10325_LUPUS_BCELL_VS_LUPUS_MYELOID_UP	0.00214133	0.0297383	0.435701	1.90385	0	132
GO_RIBONUCLEOPROTEIN_COMPLEX_BINDING	0.00205339	0.0297383	0.472204	1.90298	0	83
GSE32986_UNSTIM_VS_CURDLAN_LOWDOSE_STIM_DC_UP	0.00211864	0.0297383	0.423202	1.90281	0	171
GSE22140_GERMFREE_VS_SPF_MOUSE_CD4_TCELL_UP	0.00209644	0.0297383	0.428548	1.90201	0	149
GSE16450_IMMATURE_VS_MATURE_NEURON_CELL_LINE_DN	0.00215054	0.0297383	0.431247	1.90169	0	146
KHETCHOUMIAN_TRIM24_TARGETS_UP	0.0020202	0.0297383	0.552911	1.90104	0	35
VANTVEER_BREAST_CANCER_BRCA1_UP	0.00393701	0.0468079	0.601878	1.89789	1	24
JIANG_TIP30_TARGETS_DN	0.004	0.0468079	0.688206	1.89711	1	15
GO_CELLULAR_RESPONSE_TO_KETONE	0.00209205	0.0297383	0.522239	1.89703	0	48
HOQUE_METHYLATED_IN_CANCER	0.002	0.0297383	0.588529	1.89683	0	25
E2F3_UP.V1_DN	0.00206186	0.0297383	0.49978	1.89575	0	62
GO_CELLULAR_EXTRAVASATION	0.00200803	0.0297383	0.647645	1.89555	0	19
GO_NUCLEOID	0.00209205	0.0297383	0.550281	1.89539	0	37
GO_TETRAPYRROLE_METABOLIC_PROCESS	0.00206612	0.0297383	0.53706	1.89449	0	41
GSE2405_0H_VS_1.5H_A_PHAGOCYTOPHILUM_STIM_NEUTROPHIL_UP	0.00208333	0.0297383	0.451075	1.89436	0	106
GO_POSITIVE_REGULATION_OF_NF_KAPPAB_IMPORT_INTO_NUCLEUS	0.00408998	0.0468079	0.670607	1.89269	1	17
GO_TRNA_METABOLIC_PROCESS	0.00210526	0.0297383	0.426757	1.89204	0	150
VERHAAK_AML_WITH_NPM1_MUTATED_UP	0.00212766	0.0297383	0.437251	1.89149	0	126
GSE13522_WT_VS_IFNAR_KO_SKIN_DN	0.00210084	0.0297383	0.431936	1.89052	0	137
GO_CELLULAR_AMINO_ACID_METABOLIC_PROCESS	0.0021097	0.0297383	0.405846	1.88927	0	221
KEGG_CYTOKINE_CYTOKINE_RECEPTOR_INTERACTION	0.00203252	0.0297383	0.451068	1.88423	0	102
GO_COP9_SIGNALOSOME	0.00203666	0.0297383	0.576684	1.88414	0	27
MORI_IMMATURE_B_LYMPHOCYTE_UP	0.00204082	0.0297383	0.521223	1.884	0	46
LINDVALL_IMMORTALIZED_BY_TERT_DN	0.00209205	0.0297383	0.546354	1.88187	0	37
GO_TETRAPYRROLE_BIOSYNTHETIC_PROCESS	0.002	0.0297383	0.58387	1.88182	0	25
GSE22611_NOD2_TRANSDUCED_VS_CTRL_HEK293T_STIMULATED_WITH_MDP_2H_DN	0.00210084	0.0297383	0.423515	1.88013	0	152
GSE11961_MEMORY_BCELL_DAY7_VS_GERMINAL_CENTER_BCELL_DAY40_UP	0.00214592	0.0297383	0.432021	1.88004	0	133
HUMMERICH_SKIN_CANCER_PROGRESSION_UP	0.00208333	0.0297383	0.498284	1.87955	0	61
LENAOUR_DENDRITIC_CELL_MATURATION_UP	0.00204918	0.0297383	0.474285	1.87871	0	77
MODULE_436	0.002079	0.0297383	0.485822	1.87857	0	68
GSE10325_BCELL_VS_MYELOID_UP	0.0021097	0.0297383	0.436424	1.87729	0	120
GSE37301_LYMPHOID_PRIMED_MPP_VS_RAG2_KO_NK_CELL_UP	0.00209205	0.0297383	0.42177	1.87707	0	156
GO_SERINE_FAMILY_AMINO_ACID_METABOLIC_PROCESS	0.00202429	0.0297383	0.579816	1.87645	0	26
GO_REGULATION_OF_CELLULAR_RESPIRATION	0.00392157	0.0468079	0.667427	1.87638	1	16
GO_LIGASE_ACTIVITY_FORMING_CARBON_OXYGEN_BONDS	0.00206612	0.0297383	0.527461	1.87569	0	42
DUTERTRE_ESTRADIOL_RESPONSE_6HR_UP	0.00210084	0.0297383	0.417155	1.87508	0	166
GSE26343_UNSTIM_VS_LPS_STIM_MACROPHAGE_UP	0.00208333	0.0297383	0.420909	1.87451	0	155
GO_B_CELL_ACTIVATION	0.00204082	0.0297383	0.459678	1.8745	0	87
GSE2585_CD80_HIGH_VS_LOW_AIRE_KO_MTEC_UP	0.00206186	0.0297383	0.452742	1.874	0	99
GO_CHEMOKINE_RECEPTOR_BINDING	0.00202429	0.0297383	0.578918	1.87354	0	26
BIOCARTA_NKT_PATHWAY	0.00392157	0.0468079	0.666002	1.87237	1	16
KEGG_HYPERTROPHIC_CARDIOMYOPATHY_HCM	0.00206612	0.0297383	0.526514	1.87232	0	42
DORN_ADENOVIRUS_INFECTION_32HR_DN	0.00203666	0.0297383	0.572657	1.87099	0	27
MODULE_27	0.0021322	0.0297383	0.428356	1.86918	0	131
GO_REGULATION_OF_INTERFERON_ALPHA_PRODUCTION	0.00408998	0.0468079	0.661832	1.86792	1	17
GSE360_DC_VS_MAC_M_TUBERCULOSIS_UP	0.0021322	0.0297383	0.429302	1.86759	0	128
HUMMEL_BURKITTS_LYMPHOMA_UP	0.00399202	0.0468079	0.621516	1.86757	1	21
GSE9601_NFKB_INHIBITOR_VS_PI3K_INHIBITOR_TREATED_HCMV_INF_MONOCYTE_DN	0.0021097	0.0297383	0.434159	1.86755	0	120
MODULE_46	0.00211416	0.0297383	0.404687	1.86695	0	210
GUO_HEX_TARGETS_DN	0.00204082	0.0297383	0.516348	1.86638	0	46
BURTON_ADIPOGENESIS_2	0.0021322	0.0297383	0.506284	1.86634	0	53
GO_RESPONSE_TO_ALCOHOL	0.00214133	0.0297383	0.406418	1.86604	0	203
GSE38681_WT_VS_LYL1_KO_LYMPHOID_PRIMED_MULTIPOTENT_PROGENITOR_DN	0.00209205	0.0297383	0.41921	1.86567	0	156
GO_HOMEOSTASIS_OF_NUMBER_OF_CELLS	0.0021322	0.0297383	0.427422	1.8651	0	131
GSE27786_BCELL_VS_NEUTROPHIL_UP	0.00212766	0.0297383	0.41218	1.86493	0	179
KEGG_AMINOACYL_TRNA_BIOSYNTHESIS	0.00209644	0.0297383	0.534068	1.8646	0	39
GSE34156_NOD2_LIGAND_VS_TLR1_TLR2_LIGAND_6H_TREATED_MONOCYTE_UP	0.00211864	0.0297383	0.420542	1.86457	0	153
GO_VASCULAR_PROCESS_IN_CIRCULATORY_SYSTEM	0.00209644	0.0297383	0.495477	1.8633	0	60
GSE40274_GATA1_VS_FOXP3_AND_GATA1_TRANSDUCED_ACTIVATED_CD4_TCELL_DN	0.00210084	0.0297383	0.417195	1.86314	0	158
AKL_HTLV1_INFECTION_UP	0.00398406	0.0468079	0.610506	1.86292	1	22
MORF_SMC1L1	0.00209644	0.0297383	0.494827	1.86085	0	60
GSE27786_NKCELL_VS_MONO_MAC_UP	0.00210526	0.0297383	0.414523	1.86045	0	163
GSE37605_TREG_VS_TCONV_NOD_FOXP3_FUSION_GFP_UP	0.00203666	0.0297383	0.472092	1.86044	0	75
GSE2405_S_AUREUS_VS_A_PHAGOCYTOPHILUM_NEUTROPHIL_UP	0.00210526	0.0297383	0.439207	1.86035	0	114
GO_RESPONSE_TO_DRUG	0.00209644	0.0297383	0.394322	1.86034	0	246
GO_RESPONSE_TO_INTERLEUKIN_4	0.00200803	0.0297383	0.635583	1.86025	0	19
GO_ORGANIC_ACID_TRANSMEMBRANE_TRANSPORT	0.00206612	0.0297383	0.5131	1.86014	0	47
chr5q31	0.00207469	0.0297383	0.453808	1.86	0	92
GO_NUCLEOLAR_PART	0.0021322	0.0297383	0.496498	1.85978	0	59
GSE16385_MONOCYTE_VS_12H_ROSIGLITAZONE_IFNG_TNF_TREATED_MACROPHAGE_DN	0.00210084	0.0297383	0.418518	1.85794	0	152
HECKER_IFNB1_TARGETS	0.00206612	0.0297383	0.48232	1.85778	0	66
GSE27670_CTRL_VS_LMP1_TRANSDUCED_GC_BCELL_DN	0.00214592	0.0297383	0.425873	1.85742	0	138
SAGIV_CD24_TARGETS_DN	0.00204918	0.0297383	0.566921	1.85721	0	28
GO_RIBOSOME_BIOGENESIS	0.00209205	0.0297383	0.388287	1.85674	0	285
GSE4748_CYANOBACTERIUM_LPSLIKE_VS_LPS_AND_CYANOBACTERIUM_LPSLIKE_STIM_DC_3H_UP	0.00207039	0.0297383	0.442883	1.85594	0	105
GO_AMMONIUM_TRANSPORT	0.00206186	0.0297383	0.555547	1.85573	0	31
GO_LYMPHOCYTE_DIFFERENTIATION	0.00214592	0.0297383	0.426389	1.85553	0	133
GO_B_CELL_ACTIVATION_INVOLVED_IN_IMMUNE_RESPONSE	0.00206612	0.0297383	0.563628	1.85458	0	29
GSE12392_WT_VS_IFNB_KO_CD8A_NEG_SPLEEN_DC_UP	0.00214133	0.0297383	0.414253	1.85439	0	165
GSE26030_TH1_VS_TH17_DAY5_POST_POLARIZATION_DN	0.00211864	0.0297383	0.412403	1.85432	0	167
CAIRO_PML_TARGETS_BOUND_BY_MYC_UP	0.00399202	0.0468079	0.616632	1.85289	1	21
GSE26343_UNSTIM_VS_LPS_STIM_NFAT5_KO_MACROPHAGE_UP	0.00212314	0.0297383	0.413571	1.85095	0	161
GSE10325_LUPUS_CD4_TCELL_VS_LUPUS_BCELL_DN	0.00210526	0.0297383	0.436979	1.85091	0	114
GSE5542_IFNG_VS_IFNA_AND_IFNG_TREATED_EPITHELIAL_CELLS_6H_DN	0.00211864	0.0297383	0.417403	1.85066	0	153
GO_POSITIVE_REGULATION_OF_FAT_CELL_DIFFERENTIATION	0.00407332	0.0468079	0.566324	1.85029	1	27
GO_RESPONSE_TO_VITAMIN	0.00209644	0.0297383	0.497449	1.84998	0	54
GO_CELL_FATE_COMMITMENT	0.00204082	0.0297383	0.474881	1.8499	0	69
GO_CARDIAC_MUSCLE_TISSUE_MORPHOGENESIS	0.00200803	0.0297383	0.632046	1.84989	0	19
GSE34179_THPOK_KO_VS_WT_VA14I_NKTCELL_DN	0.00208333	0.0297383	0.439973	1.84985	0	110
GO_LEUKOCYTE_ACTIVATION	0.00212314	0.0297383	0.389455	1.84984	0	273
GO_L_AMINO_ACID_TRANSPORT	0.00204918	0.0297383	0.56437	1.84886	0	28
ELVIDGE_HIF1A_TARGETS_UP	0.00209644	0.0297383	0.496906	1.84796	0	54
JECHLINGER_EPITHELIAL_TO_MESENCHYMAL_TRANSITION_UP	0.00210526	0.0297383	0.534028	1.8474	0	38
GSE19198_CTRL_VS_IL21_TREATED_TCELL_6H_UP	0.00211416	0.0297383	0.411736	1.84676	0	162
TAKEDA_TARGETS_OF_NUP98_HOXA9_FUSION_16D_UP	0.00205339	0.0297383	0.458244	1.84672	0	83
GSE6259_FLT3L_INDUCED_33D1_POS_DC_VS_CD4_TCELL_UP	0.00212766	0.0297383	0.426888	1.84666	0	126
KEGG_ANTIGEN_PROCESSING_AND_PRESENTATION	0.00203252	0.0297383	0.547935	1.84629	0	33
KERLEY_RESPONSE_TO_CISPLATIN_UP	0.00206612	0.0297383	0.561013	1.84598	0	29
GSE40666_WT_VS_STAT4_KO_CD8_TCELL_WITH_IFNA_STIM_90MIN_DN	0.00211864	0.0297383	0.416081	1.84479	0	153
GSE17721_POLYIC_VS_CPG_8H_BMDC_DN	0.00211416	0.0297383	0.411018	1.84354	0	162
GSE14415_TCONV_VS_FOXP3_KO_INDUCED_TREG_UP	0.00209644	0.0297383	0.415109	1.84237	0	149
GO_REGULATION_OF_T_CELL_MEDIATED_IMMUNITY	0.00204918	0.0297383	0.562377	1.84233	0	28
ABRAMSON_INTERACT_WITH_AIRE	0.00206612	0.0297383	0.517997	1.84203	0	42
HALLMARK_TNFA_SIGNALING_VIA_NFKB	0.00211864	0.0297383	0.41096	1.84133	0	164
REACTOME_PEPTIDE_LIGAND_BINDING_RECEPTORS	0.00206612	0.0297383	0.507832	1.84105	0	47
V$NMYC_01	0.00210526	0.0297383	0.408414	1.84058	0	173
MODULE_107	0.00206186	0.0297383	0.543923	1.84057	0	34
TAKEDA_TARGETS_OF_NUP98_HOXA9_FUSION_10D_DN	0.00208333	0.0297383	0.463936	1.8399	0	78
GSE17721_0.5H_VS_12H_PAM3CSK4_BMDC_UP	0.00209644	0.0297383	0.413697	1.83957	0	151
GO_PRODUCTION_OF_MOLECULAR_MEDIATOR_OF_IMMUNE_RESPONSE	0.00209205	0.0297383	0.524906	1.83951	0	40
GSE10325_CD4_TCELL_VS_MYELOID_DN	0.00210084	0.0297383	0.413962	1.83772	0	152
ACOSTA_PROLIFERATION_INDEPENDENT_MYC_TARGETS_UP	0.00208333	0.0297383	0.48706	1.83721	0	61
GO_MYELOID_CELL_HOMEOSTASIS	0.002079	0.0297383	0.474816	1.83601	0	68
TIAN_TNF_SIGNALING_VIA_NFKB	0.0059761	0.0620794	0.601155	1.83438	2	22
GSE17974_0H_VS_4H_IN_VITRO_ACT_CD4_TCELL_DN	0.00210526	0.0297383	0.420527	1.83382	0	134
TSAI_RESPONSE_TO_RADIATION_THERAPY	0.00392157	0.0468079	0.651949	1.83286	1	16
GO_UNFOLDED_PROTEIN_BINDING	0.00203666	0.0297383	0.464897	1.83209	0	75
GSE4142_NAIVE_VS_GC_BCELL_DN	0.00214592	0.0297383	0.418633	1.8314	0	139
MODULE_259	0.00401606	0.0468079	0.625173	1.82978	1	19
GO_INACTIVATION_OF_MAPK_ACTIVITY	0.00413223	0.0468079	0.63641	1.82977	1	18
MODULE_75	0.0021097	0.0297383	0.394113	1.82942	0	216
LIM_MAMMARY_STEM_CELL_UP	0.00212766	0.0297383	0.404327	1.8294	0	179
GO_RESPONSE_TO_CYTOKINE	0.00218341	0.0297383	0.369172	1.82918	0	419
GSE17721_0.5H_VS_24H_CPG_BMDC_UP	0.00214133	0.0297383	0.408347	1.82795	0	165
GNF2_CD33	0.00210526	0.0297383	0.528343	1.82773	0	38
KRIGE_AMINO_ACID_DEPRIVATION	0.004	0.0468079	0.566753	1.82665	1	25
GSE36476_CTRL_VS_TSST_ACT_16H_MEMORY_CD4_TCELL_OLD_DN	0.00212766	0.0297383	0.406409	1.82664	0	168
GSE40274_CTRL_VS_SATB1_TRANSDUCED_ACTIVATED_CD4_TCELL_DN	0.00214592	0.0297383	0.419696	1.82641	0	133
MODULE_63	0.00205761	0.0297383	0.478894	1.82639	0	64
GO_REGULATION_OF_LYMPHOCYTE_CHEMOTAXIS	0.004	0.0468079	0.662532	1.82634	1	15
GSE19401_NAIVE_VS_IMMUNIZED_MOUSE_PLN_FOLLICULAR_DC_UP	0.00214133	0.0297383	0.407673	1.82493	0	165
GSE21360_SECONDARY_VS_QUATERNARY_MEMORY_CD8_TCELL_UP	0.0021322	0.0297383	0.413405	1.82455	0	147
GO_RNA_MODIFICATION	0.00204499	0.0297383	0.443461	1.8231	0	93
GSE36392_EOSINOPHIL_VS_NEUTROPHIL_IL25_TREATED_LUNG_DN	0.00212766	0.0297383	0.40555	1.82278	0	168
HALLMARK_ALLOGRAFT_REJECTION	0.0021322	0.0297383	0.420118	1.82262	0	129
GO_REGULATION_OF_LYMPHOCYTE_MIGRATION	0.00610998	0.0620794	0.55778	1.82238	2	27
GSE16385_MONOCYTE_VS_12H_IFNG_TNF_TREATED_MACROPHAGE_UP	0.00210084	0.0297383	0.410459	1.82217	0	152
REACTOME_AMINO_ACID_AND_OLIGOPEPTIDE_SLC_TRANSPORTERS	0.00998004	0.0834269	0.606326	1.82193	4	21
GO_SMALL_SUBUNIT_PROCESSOME	0.00412371	0.0468079	0.545353	1.82168	1	31
GO_IMMUNE_EFFECTOR_PROCESS	0.00209205	0.0297383	0.380706	1.82093	0	284
GSE27786_BCELL_VS_MONO_MAC_UP	0.00210084	0.0297383	0.404867	1.81985	0	166
GO_CELLULAR_RESPONSE_TO_CORTICOSTEROID_STIMULUS	0.0040404	0.0468079	0.529279	1.81979	1	35
GSE19941_IL10_KO_VS_IL10_KO_AND_NFKBP50_KO_LPS_AND_IL10_STIM_MACROPHAGE_UP	0.00215054	0.0297383	0.418975	1.81834	0	130
ZHANG_TLX_TARGETS_UP	0.00207039	0.0297383	0.454784	1.81831	0	80
MODULE_110	0.00588235	0.0617555	0.646602	1.81783	2	16
MODULE_263	0.006	0.0620794	0.56398	1.81771	2	25
GSE5589_LPS_AND_IL10_VS_LPS_AND_IL6_STIM_IL6_KO_MACROPHAGE_45MIN_UP	0.00210526	0.0297383	0.404924	1.81737	0	163
GSE22432_CONVENTIONAL_CDC_VS_PLASMACYTOID_PDC_UP	0.00211864	0.0297383	0.403902	1.81603	0	171
KEGG_P53_SIGNALING_PATHWAY	0.00211416	0.0297383	0.494191	1.81597	0	52
GO_REGULATION_OF_VIRAL_ENTRY_INTO_HOST_CELL	0.00588235	0.0617555	0.645874	1.81579	2	16
GO_ADP_BINDING	0.00404858	0.0468079	0.560922	1.8153	1	26
GO_RESPONSE_TO_ETHANOL	0.00203666	0.0297383	0.460542	1.81493	0	75
XU_HGF_SIGNALING_NOT_VIA_AKT1_48HR_UP	0.006	0.0620794	0.562061	1.81153	2	25
GO_CYCLIN_DEPENDENT_PROTEIN_KINASE_HOLOENZYME_COMPLEX	0.00610998	0.0620794	0.554386	1.81129	2	27
GO_RIBONUCLEOPROTEIN_COMPLEX_BIOGENESIS	0.0021645	0.0297383	0.366494	1.80987	0	396
MODULE_35	0.00784314	0.0733068	0.643631	1.80948	3	16
GO_LYMPHOCYTE_CHEMOTAXIS	0.006	0.0620794	0.656402	1.80944	2	15
GSE8921_UNSTIM_VS_TLR1_2_STIM_MONOCYTE_24H_UP	0.00212766	0.0297383	0.412581	1.809	0	141
GENTILE_UV_LOW_DOSE_UP	0.00998004	0.0834269	0.601971	1.80884	4	21
GO_CD4_POSITIVE_ALPHA_BETA_T_CELL_ACTIVATION	0.00796813	0.0739581	0.592475	1.8079	3	22
GSE24210_CTRL_VS_IL35_TREATED_TCONV_CD4_TCELL_DN	0.00213675	0.0297383	0.400753	1.80771	0	177
GSE42021_TREG_PLN_VS_CD24LO_TREG_THYMUS_DN	0.00207469	0.0297383	0.429821	1.80767	0	108
GO_ORGANIC_ACID_BINDING	0.00204499	0.0297383	0.439531	1.80694	0	93
GO_OSSIFICATION	0.0021322	0.0297383	0.416406	1.80651	0	129
GCM_DDX5	0.0020284	0.0297383	0.472391	1.80612	0	63
GSE19888_CTRL_VS_TCELL_MEMBRANES_ACT_MAST_CELL_PRETREAT_A3R_INH_DN	0.00215054	0.0297383	0.409532	1.80593	0	146
GSE27786_NKCELL_VS_NEUTROPHIL_UP	0.00210084	0.0297383	0.401697	1.8056	0	166
GSE33424_CD161_INT_VS_NEG_CD8_TCELL_UP	0.00210084	0.0297383	0.404141	1.80484	0	158
HUANG_FOXA2_TARGETS_DN	0.00603622	0.0620794	0.610167	1.80361	2	20
GO_SIGNAL_TRANSDUCTION_BY_P53_CLASS_MEDIATOR	0.00207469	0.0297383	0.43641	1.80307	0	96
GNF2_MSH6	0.00412371	0.0468079	0.539763	1.80301	1	31
MODULE_292	0.00204082	0.0297383	0.459377	1.80169	0	73
ABE_VEGFA_TARGETS_2HR	0.00619835	0.0620794	0.626421	1.80105	2	18
IVANOVA_HEMATOPOIESIS_STEM_CELL_AND_PROGENITOR	0.00217391	0.0297383	0.365615	1.80022	0	385
MORF_EIF3S2	0.00210084	0.0297383	0.382883	1.79964	0	234
GSE7400_CTRL_VS_CSF3_IN_VIVO_TREATED_PBMC_UP	0.00209644	0.0297383	0.405463	1.79955	0	149
NGO_MALIGNANT_GLIOMA_1P_LOH	0.00817996	0.0739581	0.637468	1.79916	3	17
GO_LEUKOCYTE_CELL_CELL_ADHESION	0.00214133	0.0297383	0.401893	1.79906	0	165
STOSSI_RESPONSE_TO_ESTRADIOL	0.00784314	0.0733068	0.639742	1.79855	3	16
GO_RESPONSE_TO_HYPEROXIA	0.008	0.0739581	0.652425	1.79847	3	15
GO_RESPONSE_TO_INCREASED_OXYGEN_LEVELS	0.008	0.0739581	0.652425	1.79847	3	15
GSE22103_LPS_VS_GMCSF_AND_IFNG_STIM_NEUTROPHIL_DN	0.00209205	0.0297383	0.404076	1.79832	0	156
MODULE_133	0.008	0.0739581	0.652192	1.79783	3	15
GSE6259_CD4_TCELL_VS_CD8_TCELL_DN	0.00209644	0.0297383	0.404991	1.79746	0	149
ZHANG_TLX_TARGETS_36HR_UP	0.00210084	0.0297383	0.399731	1.79676	0	166
GO_REGULATION_OF_CARTILAGE_DEVELOPMENT	0.00401606	0.0468079	0.613813	1.79653	1	19
GAUSSMANN_MLL_AF4_FUSION_TARGETS_D_UP	0.00784314	0.0733068	0.638901	1.79618	3	16
GSE11924_TH1_VS_TH2_CD4_TCELL_UP	0.00214133	0.0297383	0.415853	1.79615	0	124
PID_P53_DOWNSTREAM_PATHWAY	0.00204499	0.0297383	0.436873	1.79602	0	93
GSE19923_E2A_KO_VS_E2A_AND_HEB_KO_DP_THYMOCYTE_DN	0.00210084	0.0297383	0.402033	1.79543	0	158
GO_RESPONSE_TO_INTERFERON_ALPHA	0.008	0.0739581	0.651016	1.79459	3	15
GO_POSITIVE_REGULATION_OF_INTERLEUKIN_1_SECRETION	0.008	0.0739581	0.650994	1.79453	3	15
MODULE_108	0.00412371	0.0468079	0.537217	1.7945	1	31
GSE43863_NAIVE_VS_MEMORY_TH1_CD4_TCELL_D150_LCMV_UP	0.002079	0.0297383	0.464033	1.79431	0	68
GSE24210_RESTING_TREG_VS_TCONV_DN	0.00212766	0.0297383	0.399092	1.79375	0	168
GSE19888_ADENOSINE_A3R_INH_PRETREAT_AND_ACT_BY_A3R_VS_TCELL_MEMBRANES_ACT_MAST_CELL_UP	0.00211864	0.0297383	0.404471	1.79332	0	153
GO_RESPONSE_TO_ATP	0.00603622	0.0620794	0.606312	1.79222	2	20
GSE45365_WT_VS_IFNAR_KO_CD11B_DC_UP	0.00208768	0.0297383	0.417201	1.79219	0	119
GSE45739_NRAS_KO_VS_WT_ACD3_ACD28_STIM_CD4_TCELL_UP	0.00209644	0.0297383	0.402999	1.79201	0	151
GNF2_FOS	0.00617284	0.0620794	0.537892	1.79181	2	32
LEE_LIVER_CANCER_CIPROFIBRATE_UP	0.0040404	0.0468079	0.520894	1.79096	1	35
LEE_TARGETS_OF_PTCH1_AND_SUFU_UP	0.00412371	0.0468079	0.54066	1.78968	1	30
GO_L_AMINO_ACID_TRANSMEMBRANE_TRANSPORTER_ACTIVITY	0.00982318	0.0823215	0.574469	1.78854	4	23
KAECH_DAY15_EFF_VS_MEMORY_CD8_TCELL_DN	0.00207039	0.0297383	0.400254	1.78608	0	157
WANG_HCP_PROSTATE_CANCER	0.00205761	0.0297383	0.468236	1.78575	0	64
HALLMARK_IL6_JAK_STAT3_SIGNALING	0.00204918	0.0297383	0.462552	1.78545	0	67
CONCANNON_APOPTOSIS_BY_EPOXOMICIN_UP	0.00210526	0.0297383	0.397668	1.7848	0	163
GO_CELLULAR_RESPONSE_TO_ORGANIC_CYCLIC_COMPOUND	0.0021322	0.0297383	0.37233	1.78458	0	290
ENGELMANN_CANCER_PROGENITORS_UP	0.00412371	0.0468079	0.534049	1.78392	1	31
GSE22886_UNSTIM_VS_IL2_STIM_NKCELL_DN	0.00218341	0.0297383	0.394048	1.7824	0	182
GSE10240_CTRL_VS_IL22_STIM_PRIMARY_BRONCHIAL_EPITHELIAL_CELLS_UP	0.00214133	0.0297383	0.40545	1.78214	0	144
GSE24634_TREG_VS_TCONV_POST_DAY7_IL4_CONVERSION_DN	0.00215983	0.0297383	0.406151	1.78163	0	143
GSE22589_HEALTHY_VS_HIV_INFECTED_DC_UP	0.0021322	0.0297383	0.396479	1.78127	0	170
GO_CARDIAC_VENTRICLE_MORPHOGENESIS	0.011976	0.0917409	0.592675	1.78091	5	21
GSE3039_ALPHAALPHA_CD8_TCELL_VS_B2_BCELL_DN	0.0021322	0.0297383	0.403513	1.78089	0	147
HOFFMANN_SMALL_PRE_BII_TO_IMMATURE_B_LYMPHOCYTE_UP	0.00208768	0.0297383	0.485922	1.7803	0	51
GO_ERYTHROCYTE_HOMEOSTASIS	0.00214592	0.0297383	0.477465	1.77994	0	56
GSE22886_NEUTROPHIL_VS_MONOCYTE_DN	0.00217391	0.0297383	0.39289	1.77973	0	183
GSE6090_UNSTIM_VS_DC-SIGN_STIM_DC_DN	0.00207039	0.0297383	0.499291	1.77935	0	43
GCM_PPP1CC	0.00214592	0.0297383	0.476751	1.77728	0	56
SANA_RESPONSE_TO_IFNG_DN	0.00205761	0.0297383	0.465916	1.7769	0	64
NAKAMURA_METASTASIS_MODEL_UP	0.00814664	0.0739581	0.543843	1.77684	3	27
GO_ORGANIC_HYDROXY_COMPOUND_TRANSMEMBRANE_TRANSPORTER_ACTIVITY	0.0102249	0.0843538	0.629141	1.77566	4	17
GSE7852_LN_VS_FAT_TCONV_DN	0.00209644	0.0297383	0.399279	1.77546	0	151
GO_REGULATION_OF_PROTEIN_IMPORT	0.00210526	0.0297383	0.409262	1.77535	0	125
GO_MHC_PROTEIN_BINDING	0.00619835	0.0620794	0.61737	1.77503	2	18
GO_CELLULAR_RESPONSE_TO_INTERLEUKIN_4	0.0102249	0.0843538	0.628914	1.77501	4	17
GO_PIGMENT_GRANULE	0.002079	0.0297383	0.440575	1.77495	0	84
GSE24634_TEFF_VS_TCONV_DAY3_IN_CULTURE_DN	0.0021097	0.0297383	0.404257	1.77495	0	140
GO_POSITIVE_REGULATION_OF_INTERFERON_ALPHA_PRODUCTION	0.008	0.0739581	0.643742	1.77454	3	15
SMIRNOV_CIRCULATING_ENDOTHELIOCYTES_IN_CANCER_UP	0.00212314	0.0297383	0.417749	1.77315	0	115
HAN_JNK_SINGALING_UP	0.0117878	0.0905583	0.569515	1.77312	5	23
GSE6674_UNSTIM_VS_ANTI_IGM_STIM_BCELL_DN	0.00996016	0.0834171	0.581066	1.77308	4	22
GSE14386_UNTREATED_VS_IFNA_TREATED_ACT_PBMC_MS_PATIENT_DN	0.00214133	0.0297383	0.41185	1.77235	0	123
GSE35685_CD34POS_CD10NEG_CD62LPOS_VS_CD34POS_CD10POS_BONE_MARROW_DN	0.00210526	0.0297383	0.394672	1.77136	0	163
GSE27786_LIN_NEG_VS_MONO_MAC_UP	0.00211416	0.0297383	0.394889	1.7712	0	162
MODULE_265	0.0102249	0.0843538	0.627516	1.77107	4	17
GO_VENTRICULAR_CARDIAC_MUSCLE_TISSUE_DEVELOPMENT	0.00826446	0.0739581	0.615934	1.7709	3	18
DANG_MYC_TARGETS_UP	0.0021322	0.0297383	0.407943	1.7698	0	129
GO_OSTEOCLAST_DIFFERENTIATION	0.0117878	0.0905583	0.568321	1.76941	5	23
GSE7568_IL4_VS_IL4_AND_TGFB_TREATED_MACROPHAGE_24H_DN	0.0021097	0.0297383	0.393363	1.76862	0	172
GSE19374_UNINF_VS_LISTERIA_INFECTED_MACROPHAGE_UP	0.00205339	0.0297383	0.437395	1.76858	0	86
GO_REGULATION_OF_LEUKOCYTE_APOPTOTIC_PROCESS	0.00426439	0.0468079	0.479688	1.7683	1	53
GSE6259_FLT3L_INDUCED_33D1_POS_DC_VS_BCELL_UP	0.00210084	0.0297383	0.39829	1.76815	0	152
GO_INNATE_IMMUNE_RESPONSE	0.0021097	0.0297383	0.364913	1.76783	0	308
GSE40274_CTRL_VS_HELIOS_TRANSDUCED_ACTIVATED_CD4_TCELL_DN	0.00214592	0.0297383	0.408232	1.76767	0	127
GARGALOVIC_RESPONSE_TO_OXIDIZED_PHOSPHOLIPIDS_GREY_DN	0.00413223	0.0468079	0.536493	1.7653	1	29
GO_CELLULAR_RESPONSE_TO_CAMP	0.00413223	0.0468079	0.536357	1.76485	1	29
GSE22886_NAIVE_BCELL_VS_MONOCYTE_UP	0.00204918	0.0297383	0.451978	1.7638	0	72
PILON_KLF1_TARGETS_UP	0.00209205	0.0297383	0.368712	1.76314	0	285
GO_LEUKOCYTE_DIFFERENTIATION	0.00218818	0.0297428	0.386863	1.76274	0	195
MORF_PRKDC	0.00213675	0.0297383	0.39073	1.7625	0	177
GO_SOMATIC_DIVERSIFICATION_OF_IMMUNOGLOBULINS	0.011811	0.0905805	0.558915	1.76242	5	24
GO_RESPONSE_TO_CAMP	0.00214592	0.0297383	0.47245	1.76124	0	56
V$USF_C	0.00210526	0.0297383	0.390808	1.76123	0	173
GSE3337_4H_VS_16H_IFNG_IN_CD8POS_DC_UP	0.00215517	0.0297383	0.391159	1.76113	0	176
NOTCH_DN.V1_UP	0.00209205	0.0297383	0.454172	1.75937	0	70
MARKEY_RB1_ACUTE_LOF_DN	0.00214133	0.0297383	0.388602	1.75837	0	180
GSE360_T_GONDII_VS_B_MALAYI_HIGH_DOSE_MAC_UP	0.00214133	0.0297383	0.402109	1.75706	0	132
BOYLAN_MULTIPLE_MYELOMA_C_D_UP	0.00206186	0.0297383	0.424396	1.75667	0	99
VALK_AML_CLUSTER_8	0.0103306	0.0843538	0.61097	1.75663	4	18
GO_ADAPTIVE_IMMUNE_RESPONSE	0.00214133	0.0297383	0.402003	1.7566	0	132
GO_T_CELL_ACTIVATION_INVOLVED_IN_IMMUNE_RESPONSE	0.00412371	0.0468079	0.530394	1.75569	1	30
DELYS_THYROID_CANCER_UP	0.0021097	0.0297383	0.372205	1.7556	0	247
GO_BIOLOGICAL_ADHESION	0.00223214	0.0300049	0.354349	1.7553	0	434
GO_HEME_BIOSYNTHETIC_PROCESS	0.0120482	0.0921353	0.599698	1.75522	5	19
GSE45365_NK_CELL_VS_CD11B_DC_MCMV_INFECTION_UP	0.00207469	0.0297383	0.417277	1.75491	0	108
GSE34156_NOD2_LIGAND_VS_TLR1_TLR2_LIGAND_6H_TREATED_MONOCYTE_DN	0.00210526	0.0297383	0.402173	1.75473	0	135
GSE8868_SPLEEN_VS_INTESTINE_CD11B_POS_CD11C_NEG_DC_DN	0.00212766	0.0297383	0.40548	1.75405	0	126
GO_VITAMIN_METABOLIC_PROCESS	0.002079	0.0297383	0.45358	1.75389	0	68
GO_HYDRO_LYASE_ACTIVITY	0.0117878	0.0905583	0.563324	1.75385	5	23
MORF_MSH2	0.0021322	0.0297383	0.468185	1.75373	0	59
GO_RESPONSE_TO_NUTRIENT	0.00208333	0.0297383	0.416893	1.75281	0	110
GALINDO_IMMUNE_RESPONSE_TO_ENTEROTOXIN	0.00204918	0.0297383	0.450171	1.75248	0	71
GSE34515_CD16_NEG_VS_POS_MONOCYTE_UP	0.00215054	0.0297383	0.408597	1.75208	0	122
GO_POSITIVE_REGULATION_OF_TRANSCRIPTION_FACTOR_IMPORT_INTO_NUCLEUS	0.0041841	0.0468079	0.508602	1.75183	1	37
GROSS_HYPOXIA_VIA_ELK3_AND_HIF1A_DN	0.00209205	0.0297383	0.430205	1.7508	0	90
HALLMARK_INTERFERON_ALPHA_RESPONSE	0.00210084	0.0297383	0.439296	1.75067	0	81
GSE45739_NRAS_KO_VS_WT_UNSTIM_CD4_TCELL_UP	0.00208333	0.0297383	0.392787	1.74927	0	155
LEE_CALORIE_RESTRICTION_MUSCLE_UP	0.00819672	0.0739581	0.533754	1.74856	3	28
LIU_NASOPHARYNGEAL_CARCINOMA	0.00207039	0.0297383	0.477169	1.74795	0	50
KEGG_NOD_LIKE_RECEPTOR_SIGNALING_PATHWAY	0.00209205	0.0297383	0.479296	1.74763	0	49
GSE21360_NAIVE_VS_PRIMARY_MEMORY_CD8_TCELL_DN	0.002079	0.0297383	0.392755	1.74701	0	154
GO_POSITIVE_REGULATION_OF_PROTEIN_IMPORT	0.00209205	0.0297383	0.450862	1.74655	0	70
LEE_METASTASIS_AND_RNA_PROCESSING_UP	0.0122699	0.092636	0.618628	1.74598	5	17
GO_IRON_ION_HOMEOSTASIS	0.00413223	0.0468079	0.490766	1.7452	1	42
MODULE_199	0.0119522	0.0916106	0.571792	1.74479	5	22
KEGG_HEMATOPOIETIC_CELL_LINEAGE	0.0041841	0.0468079	0.506495	1.74458	1	37
GSE3565_DUSP1_VS_WT_SPLENOCYTES_DN	0.0021322	0.0297383	0.395133	1.7439	0	147
GO_CHEMOKINE_ACTIVITY	0.0103306	0.0843538	0.606399	1.74349	4	18
WIERENGA_STAT5A_TARGETS_UP	0.00214133	0.0297383	0.403638	1.7434	0	124
ONDER_CDH1_SIGNALING_VIA_CTNNB1	0.00631579	0.0620794	0.503923	1.74326	2	38
HELLER_HDAC_TARGETS_SILENCED_BY_METHYLATION_DN	0.00217391	0.0297383	0.380846	1.74272	0	201
PID_MYC_REPRESS_PATHWAY	0.00211416	0.0297383	0.474055	1.74198	0	52
GSE27859_DC_VS_CD11C_INT_F480_INT_DC_DN	0.00213675	0.0297383	0.386579	1.74103	0	175
GO_ORGAN_REGENERATION	0.00214133	0.0297383	0.465083	1.74095	0	57
GSE24634_IL4_VS_CTRL_TREATED_NAIVE_CD4_TCELL_DAY5_UP	0.00210084	0.0297383	0.392521	1.74087	0	148
GO_IMMUNE_SYSTEM_DEVELOPMENT	0.00214133	0.0297383	0.3535	1.7408	0	381
GSE25085_FETAL_BM_VS_ADULT_BM_SP4_THYMIC_IMPLANT_DN	0.00211864	0.0297383	0.38715	1.74071	0	171
SCHRAETS_MLL_TARGETS_UP	0.0122699	0.092636	0.616689	1.74051	5	17
GSE339_EX_VIVO_VS_IN_CULTURE_CD8POS_DC_DN	0.0021097	0.0297383	0.389192	1.74043	0	160
GSE15330_LYMPHOID_MULTIPOTENT_VS_MEGAKARYOCYTE_ERYTHROID_PROGENITOR_DN	0.00214592	0.0297383	0.398963	1.74006	0	138
GSE21546_SAP1A_KO_VS_SAP1A_KO_AND_ELK1_KO_ANTI_CD3_STIM_DP_THYMOCYTES_UP	0.00210526	0.0297383	0.398785	1.73995	0	135
GSE21360_NAIVE_VS_SECONDARY_MEMORY_CD8_TCELL_DN	0.00209644	0.0297383	0.391282	1.7399	0	151
RODRIGUES_NTN1_AND_DCC_TARGETS	0.0139721	0.0988763	0.578973	1.73974	6	21
GSE3982_MAST_CELL_VS_BASOPHIL_UP	0.0021097	0.0297383	0.404234	1.73883	0	120
GO_MRNA_BINDING	0.00208768	0.0297383	0.404761	1.73875	0	119
GRAESSMANN_RESPONSE_TO_MC_AND_SERUM_DEPRIVATION_UP	0.00214133	0.0297383	0.402141	1.73693	0	124
PEDERSEN_METASTASIS_BY_ERBB2_ISOFORM_1	0.011811	0.0905805	0.55073	1.73661	5	24
GO_T_CELL_DIFFERENTIATION	0.00205339	0.0297383	0.432714	1.73637	0	82
GSE15324_NAIVE_VS_ACTIVATED_CD8_TCELL_DN	0.0021097	0.0297383	0.397611	1.7363	0	136
GSE25123_WT_VS_PPARG_KO_MACROPHAGE_DN	0.00210084	0.0297383	0.391032	1.73593	0	152
REACTOME_METAL_ION_SLC_TRANSPORTERS	0.012	0.0918192	0.629628	1.73563	5	15
ZHAN_MULTIPLE_MYELOMA_CD2_DN	0.0123457	0.092636	0.520941	1.73534	5	32
GO_RESPONSE_TO_CARBOHYDRATE	0.00205761	0.0297383	0.420236	1.73435	0	95
WEINMANN_ADAPTATION_TO_HYPOXIA_UP	0.0137255	0.0971829	0.616902	1.73433	6	16
GO_POSITIVE_REGULATION_OF_LEUKOCYTE_CHEMOTAXIS	0.00208768	0.0297383	0.47315	1.7335	0	51
GSE4984_GALECTIN1_VS_LPS_STIM_DC_DN	0.00210526	0.0297383	0.406297	1.73338	0	116
SENESE_HDAC1_AND_HDAC2_TARGETS_UP	0.0021097	0.0297383	0.394736	1.73314	0	140
GO_REGULATION_OF_CYTOKINE_PRODUCTION_INVOLVED_IN_IMMUNE_RESPONSE	0.0123457	0.092636	0.52026	1.73308	5	32
GSE36527_CD69_NEG_VS_POS_TREG_CD62L_LOS_KLRG1_NEG_UP	0.00209644	0.0297383	0.390451	1.73292	0	149
GSE6259_CD4_TCELL_VS_CD8_TCELL_UP	0.00205339	0.0297383	0.417106	1.7323	0	101
WARTERS_RESPONSE_TO_IR_SKIN	0.00413223	0.0468079	0.477588	1.7314	1	47
HOFFMANN_IMMATURE_TO_MATURE_B_LYMPHOCYTE_DN	0.00631579	0.0620794	0.500488	1.73137	2	38
PID_NFAT_TFPATHWAY	0.00824742	0.0739581	0.523029	1.73132	3	30
WOOD_EBV_EBNA1_TARGETS_DN	0.00824742	0.0739581	0.51158	1.73112	3	34
GSE22919_RESTING_VS_IL2_IL12_IL15_STIM_NK_CELL_UP	0.00212314	0.0297383	0.384191	1.73046	0	174
GSE6259_33D1_POS_DC_VS_CD4_TCELL_DN	0.00210084	0.0297383	0.3898	1.73046	0	152
HALLMARK_INTERFERON_GAMMA_RESPONSE	0.00211864	0.0297383	0.384705	1.72978	0	167
GSE3039_CD4_TCELL_VS_B1_BCELL_DN	0.0021322	0.0297383	0.396282	1.72922	0	131
GO_RIBOSOME_BINDING	0.00838574	0.0739581	0.495217	1.72896	3	39
GO_ORGANIC_ACID_TRANSMEMBRANE_TRANSPORTER_ACTIVITY	0.0021322	0.0297383	0.461571	1.72896	0	59
GSE43863_NAIVE_VS_TFH_CD4_EFF_TCELL_D6_LCMV_DN	0.00207039	0.0297383	0.471954	1.72885	0	50
GSE12392_CD8A_POS_VS_NEG_SPLEEN_IFNB_KO_DC_DN	0.0021097	0.0297383	0.384509	1.72881	0	172
REACTOME_AMINO_ACID_TRANSPORT_ACROSS_THE_PLASMA_MEMBRANE	0.0122699	0.092636	0.612444	1.72853	5	17
GO_POSITIVE_REGULATION_OF_CYTOKINE_SECRETION	0.00209205	0.0297383	0.474019	1.72838	0	49
GSE46606_UNSTIM_VS_CD40L_IL2_IL5_DAY1_STIMULATED_BCELL_DN	0.00212766	0.0297383	0.393389	1.72815	0	142
LINDGREN_BLADDER_CANCER_HIGH_RECURRENCE	0.00824742	0.0739581	0.521996	1.7279	3	30
GSE1448_ANTI_VALPHA2_VS_VBETA5_DP_THYMOCYTE_DN	0.00214592	0.0297383	0.396913	1.72726	0	133
GSE43863_NAIVE_VS_MEMORY_LY6C_INT_CXCR5POS_CD4_TCELL_D150_LCMV_DN	0.00210084	0.0297383	0.384066	1.72635	0	166
GO_REGULATION_OF_CYTOKINE_SECRETION	0.00208333	0.0297383	0.435255	1.72616	0	78
GSE43863_TFH_VS_LY6C_INT_CXCR5POS_EFFECTOR_CD4_TCELL_UP	0.00209644	0.0297383	0.388612	1.72476	0	149
CASTELLANO_NRAS_TARGETS_UP	0.00414079	0.0468079	0.483909	1.72454	1	43
BHAT_ESR1_TARGETS_VIA_AKT1_UP	0.00211864	0.0297383	0.384847	1.72433	0	164
APPEL_IMATINIB_RESPONSE	0.00826446	0.0739581	0.523831	1.72363	3	29
GROSS_ELK3_TARGETS_DN	0.015748	0.104791	0.546562	1.72347	7	24
GSE3982_DC_VS_EFF_MEMORY_CD4_TCELL_UP	0.00212766	0.0297383	0.392944	1.72291	0	141
PICCALUGA_ANGIOIMMUNOBLASTIC_LYMPHOMA_UP	0.00204499	0.0297383	0.417705	1.72259	0	94
GO_PHOSPHATIDYLSERINE_BINDING	0.0137255	0.0971829	0.612678	1.72246	6	16
GSE3337_CTRL_VS_16H_IFNG_IN_CD8POS_DC_UP	0.00209644	0.0297383	0.387308	1.72223	0	151
WINTER_HYPOXIA_METAGENE	0.00210084	0.0297383	0.38555	1.72182	0	158
KEGG_RETINOL_METABOLISM	0.012	0.0918192	0.624329	1.72102	5	15
GSE32986_UNSTIM_VS_GMCSF_STIM_DC_DN	0.0021322	0.0297383	0.389787	1.72031	0	147
CYCLIN_D1_KE_.V1_DN	0.00408998	0.0468079	0.420664	1.71938	1	88
GO_PLATELET_MORPHOGENESIS	0.0122699	0.092636	0.609171	1.71929	5	17
GSE4984_UNTREATED_VS_GALECTIN1_TREATED_DC_DN	0.00416667	0.0468079	0.409249	1.7187	1	106
MULLIGHAN_NPM1_MUTATED_SIGNATURE_2_DN	0.00419287	0.0468079	0.462038	1.71828	1	54
GSE40666_WT_VS_STAT4_KO_CD8_TCELL_UP	0.00627615	0.0620794	0.490306	1.71826	2	40
GO_POSITIVE_REGULATION_OF_FIBROBLAST_PROLIFERATION	0.0121951	0.092636	0.509729	1.71756	5	33
HELLEBREKERS_SILENCED_DURING_TUMOR_ANGIOGENESIS	0.00619835	0.0620794	0.486661	1.71671	2	41
GSE21063_CTRL_VS_ANTI_IGM_STIM_BCELL_8H_UP	0.00412371	0.0468079	0.414694	1.71651	1	99
GO_T_CELL_HOMEOSTASIS	0.00819672	0.0739581	0.523898	1.71627	3	28
GRAHAM_CML_QUIESCENT_VS_NORMAL_QUIESCENT_UP	0.00408163	0.0468079	0.44051	1.71601	1	69
GSE27786_NKCELL_VS_NKTCELL_DN	0.00214133	0.0297383	0.398739	1.71593	0	123
GSE3920_UNTREATED_VS_IFNG_TREATED_ENDOTHELIAL_CELL_UP	0.00207469	0.0297383	0.418552	1.7155	0	92
GO_RESPONSE_TO_AMINE	0.0101833	0.0843538	0.524796	1.71461	4	27
GO_RESPONSE_TO_TESTOSTERONE	0.0120724	0.0922152	0.579934	1.71425	5	20
GSE21546_UNSTIM_VS_ANTI_CD3_STIM_ELK1_KO_DP_THYMOCYTES_UP	0.00209205	0.0297383	0.421205	1.71417	0	90
HARRIS_HYPOXIA	0.00209205	0.0297383	0.471482	1.71266	0	48
GO_LEUKOCYTE_MEDIATED_IMMUNITY	0.00209205	0.0297383	0.420679	1.71203	0	90
GROSS_HYPOXIA_VIA_ELK3_ONLY_UP	0.00819672	0.0739581	0.522578	1.71195	3	28
GSE2706_UNSTIM_VS_2H_R848_DC_DN	0.00215054	0.0297383	0.394143	1.71057	0	130
GO_MEMBRANE_MICRODOMAIN	0.00210526	0.0297383	0.377384	1.70969	0	178
GSE7509_UNSTIM_VS_TNFA_IL1B_IL6_PGE_STIM_DC_UP	0.00211864	0.0297383	0.38139	1.70884	0	164
MUELLER_PLURINET	0.00215054	0.0297383	0.360811	1.70836	0	262
NAKAYAMA_SOFT_TISSUE_TUMORS_PCA2_DN	0.015748	0.104791	0.541755	1.70831	7	24
KEGG_PRION_DISEASES	0.0101833	0.0843538	0.522768	1.70799	4	27
GSE40666_UNTREATED_VS_IFNA_STIM_EFFECTOR_CD8_TCELL_90MIN_UP	0.00215983	0.0297383	0.389243	1.70746	0	143
GO_IMMUNOGLOBULIN_PRODUCTION	0.00824742	0.0739581	0.515779	1.70732	3	30
GO_NCRNA_PROCESSING	0.00220751	0.0297993	0.350638	1.70647	0	344
GSE22025_TGFB1_VS_TGFB1_AND_PROGESTERONE_TREATED_CD4_TCELL_UP	0.00215054	0.0297383	0.397458	1.70432	0	122
GSE5503_MLN_DC_VS_PLN_DC_ACTIVATED_ALLOGENIC_TCELL_DN	0.0021097	0.0297383	0.390153	1.70373	0	136
GSE41176_WT_VS_TAK1_KO_ANTI_IGM_STIM_BCELL_3H_DN	0.00213675	0.0297383	0.378295	1.70372	0	175
GSE22103_UNSTIM_VS_LPS_STIM_NEUTROPHIL_UP	0.00210084	0.0297383	0.378952	1.70336	0	166
DAUER_STAT3_TARGETS_DN	0.010101	0.0843538	0.495205	1.70264	4	35
GO_RECEPTOR_ACTIVITY	0.00217865	0.0297383	0.34557	1.70219	0	400
GSE3691_IFN_PRODUCING_KILLER_DC_VS_PLASMACYTOID_DC_SPLEEN_DN	0.00421053	0.0468079	0.401791	1.70187	1	114
GNF2_MLH1	0.0125523	0.092636	0.48539	1.70103	5	40
GSE10325_LUPUS_CD4_TCELL_VS_LUPUS_MYELOID_DN	0.00214133	0.0297383	0.379864	1.70045	0	165
GSE21379_TFH_VS_NON_TFH_SAP_KO_CD4_TCELL_UP	0.0021322	0.0297383	0.385273	1.70038	0	147
GO_PYRIMIDINE_RIBONUCLEOSIDE_METABOLIC_PROCESS	0.0160643	0.106577	0.580862	1.70009	7	19
GSE17974_CTRL_VS_ACT_IL4_AND_ANTI_IL12_6H_CD4_TCELL_DN	0.00214133	0.0297383	0.394881	1.69933	0	123
GSE37532_TREG_VS_TCONV_CD4_TCELL_FROM_LN_DN	0.00212314	0.0297383	0.379674	1.69924	0	161
GO_MUSCLE_ORGAN_MORPHOGENESIS	0.0157171	0.104689	0.545667	1.69887	7	23
GSE9960_GRAM_NEG_VS_GRAM_POS_SEPSIS_PBMC_UP	0.0021322	0.0297383	0.389328	1.69887	0	131
GSE19198_CTRL_VS_IL21_TREATED_TCELL_24H_UP	0.00214592	0.0297383	0.389419	1.69843	0	138
STK33_NOMO_UP	0.00215517	0.0297383	0.371755	1.69712	0	197
GSE3203_WT_VS_IFNAR1_KO_INFLUENZA_INFECTED_LN_BCELL_DN	0.00204918	0.0297383	0.428441	1.69711	0	77
GO_T_CELL_DIFFERENTIATION_INVOLVED_IN_IMMUNE_RESPONSE	0.0120724	0.0922152	0.574037	1.69681	5	20
GSE27786_CD4_VS_CD8_TCELL_DN	0.0021322	0.0297383	0.384461	1.6968	0	147
SCHLOSSER_MYC_TARGETS_REPRESSED_BY_SERUM	0.00214133	0.0297383	0.385962	1.69648	0	144
GNF2_PA2G4	0.00204918	0.0297383	0.42828	1.69648	0	77
MODULE_115	0.018	0.114371	0.526357	1.69645	8	25
GO_REGULATION_OF_REACTIVE_OXYGEN_SPECIES_BIOSYNTHETIC_PROCESS	0.00619835	0.0620794	0.467542	1.69498	2	47
GO_RESPONSE_TO_HEAT	0.00417537	0.0468079	0.462626	1.69494	1	51
MORF_AATF	0.00215517	0.0297383	0.371033	1.6949	0	198
MEK_UP.V1_UP	0.00414079	0.0468079	0.40443	1.6948	1	105
HOFFMANN_LARGE_TO_SMALL_PRE_BII_LYMPHOCYTE_DN	0.00824742	0.0739581	0.473149	1.69379	3	45
HOELZEL_NF1_TARGETS_UP	0.00215983	0.0297383	0.453842	1.69278	0	58
KINSEY_TARGETS_OF_EWSR1_FLII_FUSION_DN	0.00212766	0.0297383	0.371985	1.69258	0	189
GO_CELL_ACTIVATION_INVOLVED_IN_IMMUNE_RESPONSE	0.00207469	0.0297383	0.412807	1.69195	0	92
HUANG_GATA2_TARGETS_DN	0.00214133	0.0297383	0.451955	1.69181	0	57
GSE18791_CTRL_VS_NEWCASTLE_VIRUS_DC_14H_DN	0.00408998	0.0468079	0.413916	1.6918	1	88
GTGGGTGK_UNKNOWN	0.00215983	0.0297383	0.385603	1.69149	0	143
GSE46143_CTRL_VS_LMP2A_TRANSDUCED_CD10_POS_GC_BCELL_UP	0.0021097	0.0297383	0.393228	1.69148	0	120
GO_CARGO_RECEPTOR_ACTIVITY	0.018	0.114371	0.524678	1.69104	8	25
GO_RESPONSE_TO_TEMPERATURE_STIMULUS	0.00209644	0.0297383	0.424575	1.69	0	79
GO_GLYCEROLIPID_CATABOLIC_PROCESS	0.0160643	0.106577	0.577117	1.68912	7	19
GO_REGULATION_OF_TRANSCRIPTION_FACTOR_IMPORT_INTO_NUCLEUS	0.00409836	0.0468079	0.432837	1.6891	1	72
GSE36392_MAC_VS_NEUTROPHIL_IL25_TREATED_LUNG_DN	0.00204499	0.0297383	0.410782	1.68875	0	93
V$COREBINDINGFACTOR_Q6	0.00212766	0.0297383	0.385104	1.68853	0	141
GSE29949_MICROGLIA_BRAIN_VS_CD8_NEG_DC_SPLEEN_UP	0.00407332	0.0468079	0.403012	1.68823	1	104
GSE40274_HELIOS_VS_FOXP3_AND_HELIOS_TRANSDUCED_ACTIVATED_CD4_TCELL_DN	0.00212766	0.0297383	0.384273	1.68811	0	142
KEEN_RESPONSE_TO_ROSIGLITAZONE_DN	0.00205339	0.0297383	0.420561	1.6876	0	82
GO_CYTOKINE_PRODUCTION	0.00612245	0.0620794	0.433204	1.68755	2	69
GSE9650_NAIVE_VS_EFF_CD8_TCELL_UP	0.00210526	0.0297383	0.375923	1.68721	0	163
GRADE_COLON_AND_RECTAL_CANCER_UP	0.00211864	0.0297383	0.357902	1.68694	0	250
GO_POSITIVE_REGULATION_OF_LEUKOCYTE_MIGRATION	0.00614754	0.0620794	0.436945	1.68661	2	67
GO_POSITIVE_REGULATION_OF_INTERLEUKIN_12_PRODUCTION	0.0159681	0.10615	0.561176	1.68626	7	21
GO_REGULATION_OF_RNA_STABILITY	0.0021097	0.0297383	0.391654	1.68623	0	121
MORF_PTPN11	0.00407332	0.0468079	0.402368	1.68553	1	104
GSE1460_INTRATHYMIC_T_PROGENITOR_VS_DP_THYMOCYTE_UP	0.00421053	0.0468079	0.395004	1.68521	1	116
GSE3565_CTRL_VS_LPS_INJECTED_DUSP1_KO_SPLENOCYTES_DN	0.00214592	0.0297383	0.386221	1.68448	0	138
V$MAX_01	0.00212314	0.0297383	0.373978	1.68446	0	174
RICKMAN_HEAD_AND_NECK_CANCER_A	0.0179283	0.114132	0.551908	1.68411	8	22
REACTOME_FORMATION_OF_TUBULIN_FOLDING_INTERMEDIATES_BY_CCT_TRIC	0.0224949	0.131844	0.596646	1.68394	10	17
GSE15930_NAIVE_VS_72H_IN_VITRO_STIM_CD8_TCELL_UP	0.00214592	0.0297383	0.38882	1.68361	0	127
chr20p13	0.0123457	0.092636	0.50541	1.68361	5	32
GSE9316_IL6_KO_VS_IFNG_KO_INVIVO_EXPANDED_CD4_TCELL_DN	0.00213675	0.0297383	0.381934	1.68361	0	145
GO_NEURON_MIGRATION	0.010352	0.0843538	0.472305	1.68318	4	43
GSE46606_IRF4HIGH_VS_IRF4MID_CD40L_IL2_IL5_DAY1_STIMULATED_BCELL_DN	0.004158	0.0468079	0.41766	1.68263	1	84
REACTOME_MITOCHONDRIAL_PROTEIN_IMPORT	0.00824742	0.0739581	0.470025	1.68261	3	45
GO_AGING	0.00210526	0.0297383	0.373357	1.68259	0	173
GO_SKELETAL_MUSCLE_CELL_DIFFERENTIATION	0.0101833	0.0843538	0.514894	1.68226	4	27
SERVITJA_LIVER_HNF1A_TARGETS_UP	0.00207039	0.0297383	0.42073	1.68216	0	80
GSE2128_CTRL_VS_MIMETOPE_NEGATIVE_SELECTION_DP_THYMOCYTE_NOD_UP	0.00210526	0.0297383	0.379351	1.68187	0	150
GSE21546_UNSTIM_VS_ANTI_CD3_STIM_SAP1A_KO_AND_ELK1_KO_DP_THYMOCYTES_DN	0.00619835	0.0620794	0.463882	1.68171	2	47
DACOSTA_ERCC3_ALLELE_XPCS_VS_TTD_DN	0.0160643	0.106577	0.574537	1.68157	7	19
GO_POSITIVE_REGULATION_OF_CHEMOTAXIS	0.00413223	0.0468079	0.439069	1.68116	1	65
COLDREN_GEFITINIB_RESISTANCE_UP	0.0021322	0.0297383	0.448736	1.68088	0	59
GO_REGULATION_OF_LEUKOCYTE_CHEMOTAXIS	0.00214592	0.0297383	0.450858	1.68075	0	56
TANG_SENESCENCE_TP53_TARGETS_UP	0.0176471	0.112449	0.597811	1.68066	8	16
MODULE_47	0.0040568	0.0468079	0.404777	1.68057	1	98
GO_SINGLE_ORGANISM_CELL_ADHESION	0.00210526	0.0297383	0.356044	1.68034	0	248
MARTORIATI_MDM4_TARGETS_FETAL_LIVER_DN	0.00220264	0.0297993	0.342039	1.68003	0	383
GSE15930_NAIVE_VS_24H_IN_VITRO_STIM_INFAB_CD8_TCELL_DN	0.00218341	0.0297383	0.369906	1.67964	0	185
TARTE_PLASMA_CELL_VS_PLASMABLAST_DN	0.0021322	0.0297383	0.350373	1.67934	0	290
MURAKAMI_UV_RESPONSE_6HR_UP	0.018	0.114371	0.521008	1.67921	8	25
GSE21063_CTRL_VS_ANTI_IGM_STIM_BCELL_NFATC1_KO_16H_UP	0.00417537	0.0468079	0.390835	1.67892	1	119
GSE21063_WT_VS_NFATC1_KO_3H_ANTI_IGM_STIM_BCELL_UP	0.00207469	0.0297383	0.406258	1.67849	0	96
GSE15139_GMCSF_TREATED_VS_UNTREATED_NEUTROPHILS_DN	0.00212766	0.0297383	0.373353	1.67807	0	168
BONOME_OVARIAN_CANCER_POOR_SURVIVAL_DN	0.0176471	0.112449	0.596704	1.67755	8	16
GSE13522_CTRL_VS_T_CRUZI_Y_STRAIN_INF_SKIN_IFNG_KO_DN	0.00609756	0.0620794	0.425924	1.67731	2	74
GSE24634_IL4_VS_CTRL_TREATED_NAIVE_CD4_TCELL_DAY7_DN	0.0021097	0.0297383	0.382	1.67722	0	140
TAKEDA_TARGETS_OF_NUP98_HOXA9_FUSION_6HR_DN	0.0102459	0.0843538	0.511607	1.67601	4	28
GSE18281_SUBCAPSULAR_VS_CENTRAL_CORTICAL_REGION_OF_THYMUS_DN	0.00211864	0.0297383	0.372708	1.67578	0	171
MARCHINI_TRABECTEDIN_RESISTANCE_DN	0.014433	0.101231	0.505882	1.67456	6	30
GSE3920_UNTREATED_VS_IFNA_TREATED_ENDOTHELIAL_CELL_UP	0.00210084	0.0297383	0.374936	1.67442	0	158
GO_AMINO_ACID_TRANSMEMBRANE_TRANSPORT	0.01222	0.092636	0.512484	1.67439	5	27
BERENJENO_TRANSFORMED_BY_RHOA_UP	0.00220751	0.0297993	0.336134	1.674	0	455
GO_POSITIVE_REGULATION_OF_LYMPHOCYTE_MIGRATION	0.0160643	0.106577	0.571711	1.6733	7	19
GO_NCRNA_METABOLIC_PROCESS	0.00215983	0.0297383	0.33422	1.67202	0	462
GSE21670_STAT3_KO_VS_WT_CD4_TCELL_TGFB_IL6_TREATED_DN	0.00210526	0.0297383	0.377054	1.67169	0	150
GSE42724_NAIVE_BCELL_VS_PLASMABLAST_UP	0.00214592	0.0297383	0.382098	1.67157	0	139
GO_ANION_TRANSMEMBRANE_TRANSPORT	0.00204499	0.0297383	0.406496	1.67113	0	93
MODULE_321	0.00205339	0.0297383	0.416433	1.67104	0	82
GO_RESPONSE_TO_EXTRACELLULAR_STIMULUS	0.0021097	0.0297383	0.353716	1.67099	0	255
GO_TRANSLATION_FACTOR_ACTIVITY_RNA_BINDING	0.00409836	0.0468079	0.428174	1.6709	1	72
GO_OUTER_MEMBRANE	0.00215054	0.0297383	0.384974	1.67077	0	130
SANSOM_APC_TARGETS_REQUIRE_MYC	0.00208333	0.0297383	0.375153	1.67073	0	155
GO_REGULATION_OF_MYELOID_LEUKOCYTE_DIFFERENTIATION	0.00614754	0.0620794	0.432655	1.67005	2	67
GSE43955_1H_VS_20H_ACT_CD4_TCELL_UP	0.00212314	0.0297383	0.37315	1.67004	0	161
GSE29618_MONOCYTE_VS_PDC_DN	0.00214133	0.0297383	0.379888	1.66979	0	144
GSE43955_TGFB_IL6_VS_TGFB_IL6_IL23_TH17_ACT_CD4_TCELL_52H_DN	0.00214133	0.0297383	0.37301	1.66976	0	165
CRX_DN.V1_DN	0.004158	0.0468079	0.43178	1.6696	1	68
GO_ATPASE_REGULATOR_ACTIVITY	0.018	0.114371	0.518021	1.66958	8	25
GO_CELL_CELL_ADHESION	0.00215054	0.0297383	0.352872	1.6693	0	264
SANSOM_WNT_PATHWAY_REQUIRE_MYC	0.01222	0.092636	0.510735	1.66867	5	27
GO_RESPONSE_TO_STEROID_HORMONE	0.0021097	0.0297383	0.353217	1.66863	0	255
GO_ATPASE_ACTIVATOR_ACTIVITY	0.022	0.129511	0.605164	1.66819	10	15
DANG_REGULATED_BY_MYC_UP	0.00209644	0.0297383	0.443476	1.66774	0	60
GSE37416_CTRL_VS_0H_F_TULARENSIS_LVS_NEUTROPHIL_DN	0.0123967	0.092636	0.468981	1.66773	5	42
REACTOME_CLASS_A1_RHODOPSIN_LIKE_RECEPTORS	0.00419287	0.0468079	0.418941	1.66757	1	79
GSE3982_EOSINOPHIL_VS_MAST_CELL_DN	0.00211864	0.0297383	0.376049	1.6673	0	153
BECKER_TAMOXIFEN_RESISTANCE_UP	0.0146444	0.101231	0.483964	1.66697	6	37
SANA_TNF_SIGNALING_UP	0.00639659	0.0620794	0.452173	1.66687	2	53
RUTELLA_RESPONSE_TO_HGF_VS_CSF2RB_AND_IL4_DN	0.0021645	0.0297383	0.366988	1.66646	0	184
GSE3337_4H_VS_16H_IFNG_IN_CD8POS_DC_DN	0.00212766	0.0297383	0.380014	1.66621	0	141
GSE7852_THYMUS_VS_FAT_TCONV_DN	0.00210084	0.0297383	0.375565	1.66567	0	148
GO_CELLULAR_RESPONSE_TO_TOXIC_SUBSTANCE	0.018595	0.116984	0.579144	1.66512	8	18
LIEN_BREAST_CARCINOMA_METAPLASTIC_VS_DUCTAL_UP	0.0181818	0.115471	0.48429	1.66511	8	35
GSE27670_BLIMP1_VS_LMP1_TRANSDUCED_GC_BCELL_UP	0.00210084	0.0297383	0.375265	1.66434	0	148
GSE6269_FLU_VS_STAPH_AUREUS_INF_PBMC_DN	0.0021097	0.0297383	0.378653	1.66253	0	140
GSE19198_6H_VS_24H_IL21_TREATED_TCELL_DN	0.0021097	0.0297383	0.378536	1.66201	0	140
MODULE_84	0.0021978	0.0297993	0.342204	1.66189	0	332
GSE40274_CTRL_VS_XBP1_TRANSDUCED_ACTIVATED_CD4_TCELL_DN	0.0021097	0.0297383	0.380416	1.66121	0	136
GSE14415_ACT_VS_CTRL_NATURAL_TREG_DN	0.0021097	0.0297383	0.378224	1.66065	0	140
GSE41867_NAIVE_VS_EFFECTOR_CD8_TCELL_DN	0.00210526	0.0297383	0.368429	1.66038	0	173
GSE411_WT_VS_SOCS3_KO_MACROPHAGE_IL6_STIM_400MIN_UP	0.0021097	0.0297383	0.378143	1.66029	0	140
GO_CIRCULATORY_SYSTEM_PROCESS	0.00215054	0.0297383	0.376501	1.66028	0	146
CHYLA_CBFA2T3_TARGETS_DN	0.00214133	0.0297383	0.384378	1.66021	0	124
GSE16522_MEMORY_VS_NAIVE_ANTI_CD3CD28_STIM_CD8_TCELL_DN	0.00215983	0.0297383	0.378445	1.66009	0	143
GO_RESPONSE_TO_OXYGEN_LEVELS	0.00212766	0.0297383	0.364717	1.65951	0	189
GSE12003_4D_VS_8D_CULTURE_BM_PROGENITOR_UP	0.00214592	0.0297383	0.383228	1.6594	0	127
MORF_RFC4	0.00214592	0.0297383	0.379247	1.6591	0	139
GSE19401_RETINOIC_ACID_VS_RETINOIC_ACID_AND_PAM2CSK4_STIM_FOLLICULAR_DC_UP	0.00410678	0.0468079	0.39945	1.65898	1	101
GO_RESPONSE_TO_ESTRADIOL	0.00612245	0.0620794	0.422986	1.65896	2	73
GSE22196_HEALTHY_VS_OBESE_MOUSE_SKIN_GAMMADELTA_TCELL_DN	0.00211864	0.0297383	0.368859	1.65853	0	167
GSE1432_CTRL_VS_IFNG_6H_MICROGLIA_DN	0.00215054	0.0297383	0.375986	1.65801	0	146
V$GATA_C	0.00414079	0.0468079	0.395626	1.65791	1	105
GSE44649_WT_VS_MIR155_KO_NAIVE_CD8_TCELL_UP	0.00417537	0.0468079	0.385824	1.6574	1	119
GSE11973_MIR223_KOVS_WT_BONE_MARROW_NEUTROPHIL_DN	0.00214133	0.0297383	0.377035	1.65724	0	144
GSE2770_IL12_AND_TGFB_ACT_VS_ACT_CD4_TCELL_6H_DN	0.00209644	0.0297383	0.370529	1.65713	0	159
GSE39820_CTRL_VS_TGFBETA3_IL6_CD4_TCELL_UP	0.00211864	0.0297383	0.368517	1.65699	0	167
GO_INTRINSIC_APOPTOTIC_SIGNALING_PATHWAY	0.0041841	0.0468079	0.386888	1.65677	1	118
GSE36009_WT_VS_NLRP10_KO_DC_UP	0.00210526	0.0297383	0.373669	1.65668	0	150
PID_HDAC_CLASSIII_PATHWAY	0.0199601	0.121847	0.551329	1.65667	9	21
GSE17721_CTRL_VS_CPG_12H_BMDC_DN	0.00215054	0.0297383	0.381723	1.65667	0	130
CHESLER_BRAIN_QTL_CIS	0.00828157	0.0739581	0.452221	1.65656	3	50
GSE14415_INDUCED_TREG_VS_FAILED_INDUCED_TREG_UP	0.00212314	0.0297383	0.367762	1.65646	0	174
GO_IMMUNOGLOBULIN_PRODUCTION_INVOLVED_IN_IMMUNOGLOBULIN_MEDIATED_IMMUNE_RESPONSE	0.0196078	0.120025	0.58916	1.65634	9	16
KRAS.KIDNEY_UP.V1_UP	0.0144628	0.101231	0.503376	1.65633	6	29
GSE29618_LAIV_VS_TIV_FLU_VACCINE_DAY7_MONOCYTE_UP	0.00210526	0.0297383	0.37978	1.65614	0	134
GO_PROTEIN_KINASE_B_SIGNALING	0.01222	0.092636	0.506821	1.65589	5	27
GO_CELL_ACTIVATION	0.00214592	0.0297383	0.337832	1.65574	0	365
GO_ALPHA_AMINO_ACID_METABOLIC_PROCESS	0.00214592	0.0297383	0.378441	1.65557	0	139
GO_POSITIVE_REGULATION_OF_INTERLEUKIN_10_PRODUCTION	0.018595	0.116984	0.575747	1.65536	8	18
GO_POSITIVE_REGULATION_OF_CYCLIN_DEPENDENT_PROTEIN_KINASE_ACTIVITY	0.0199203	0.121715	0.542419	1.65516	9	22
GSE17721_12H_VS_24H_PAM3CSK4_BMDC_UP	0.00207039	0.0297383	0.370886	1.65502	0	157
GO_POSITIVE_REGULATION_OF_NEURON_DEATH	0.0125523	0.092636	0.453874	1.65493	5	49
GSE29164_UNTREATED_VS_CD8_TCELL_TREATED_MELANOMA_DAY3_DN	0.00210084	0.0297383	0.373018	1.65438	0	148
GO_REGULATION_OF_LYMPHOCYTE_APOPTOTIC_PROCESS	0.020202	0.123267	0.481161	1.65435	9	35
GO_ION_HOMEOSTASIS	0.00210084	0.0297383	0.348092	1.65429	0	272
GSE27786_CD4_TCELL_VS_NEUTROPHIL_UP	0.00214133	0.0297383	0.369544	1.65425	0	165
GSE39556_UNTREATED_VS_3H_POLYIC_INJ_MOUSE_CD8A_DC_UP	0.0021097	0.0297383	0.384212	1.65419	0	121
CHIANG_LIVER_CANCER_SUBCLASS_CTNNB1_DN	0.00616016	0.0620794	0.409083	1.6541	2	86
GSE21360_PRIMARY_VS_TERTIARY_MEMORY_CD8_TCELL_UP	0.00213675	0.0297383	0.367235	1.65391	0	175
GO_PROTEIN_REFOLDING	0.0196078	0.120025	0.58829	1.65389	9	16
GSE40274_FOXP3_VS_FOXP3_AND_XBP1_TRANSDUCED_ACTIVATED_CD4_TCELL_UP	0.00614754	0.0620794	0.424742	1.65349	2	71
MODULE_122	0.00828157	0.0739581	0.451134	1.65258	3	50
HOFFMANN_PRE_BI_TO_LARGE_PRE_BII_LYMPHOCYTE_DN	0.00215983	0.0297383	0.442942	1.65212	0	58
GSE43863_NAIVE_VS_TFH_CD4_EFF_TCELL_D6_LCMV_UP	0.00214133	0.0297383	0.378009	1.65176	0	132
MODULE_61	0.0165289	0.109065	0.468092	1.65121	7	41
GSE21033_CTRL_VS_POLYIC_STIM_DC_24H_UP	0.00421053	0.0468079	0.386791	1.65016	1	116
MORF_DNMT1	0.004158	0.0468079	0.390907	1.65007	1	111
GSE24671_CTRL_VS_BAKIMULC_INFECTED_MOUSE_SPLENOCYTES_DN	0.00407332	0.0468079	0.393837	1.64979	1	104
GO_L_ALPHA_AMINO_ACID_TRANSMEMBRANE_TRANSPORT	0.028	0.15016	0.598459	1.64971	13	15
YAO_TEMPORAL_RESPONSE_TO_PROGESTERONE_CLUSTER_17	0.00211864	0.0297383	0.368169	1.6496	0	164
MORF_BUB3	0.00213675	0.0297383	0.3482	1.64955	0	267
GSE42088_UNINF_VS_LEISHMANIA_INF_DC_2H_UP	0.00212766	0.0297383	0.381209	1.64906	0	126
MCLACHLAN_DENTAL_CARIES_UP	0.0021097	0.0297383	0.368651	1.64857	0	160
RIZ_ERYTHROID_DIFFERENTIATION_12HR	0.018595	0.116984	0.573385	1.64857	8	18
ONDER_CDH1_TARGETS_2_UP	0.00421941	0.0468079	0.391099	1.64848	1	113
GSE17721_CTRL_VS_PAM3CSK4_6H_BMDC_DN	0.00214133	0.0297383	0.375039	1.64847	0	144
KEGG_DILATED_CARDIOMYOPATHY	0.0144628	0.101231	0.463473	1.64814	6	42
GSE33292_DN3_THYMOCYTE_VS_TCF1_KO_TCELL_LYMPHOMA_UP	0.00215983	0.0297383	0.375691	1.64801	0	143
GSE40274_CTRL_VS_EOS_TRANSDUCED_ACTIVATED_CD4_TCELL_DN	0.00411523	0.0468079	0.398968	1.64657	1	95
BOSCO_INTERFERON_INDUCED_ANTIVIRAL_MODULE	0.00215983	0.0297383	0.441382	1.6463	0	58
REACTOME_BASIGIN_INTERACTIONS	0.0265849	0.145906	0.583179	1.64594	12	17
GSE7509_DC_VS_MONOCYTE_UP	0.00212766	0.0297383	0.365876	1.64549	0	169
GSE24634_TREG_VS_TCONV_POST_DAY5_IL4_CONVERSION_UP	0.00213675	0.0297383	0.364781	1.64545	0	177
GSE5542_IFNG_VS_IFNA_AND_IFNG_TREATED_EPITHELIAL_CELLS_24H_DN	0.00416667	0.0468079	0.391331	1.64534	1	110
NABA_ECM_AFFILIATED	0.00642398	0.0620794	0.439506	1.64521	2	57
GSE22432_MULTIPOTENT_PROGENITOR_VS_CDC_DN	0.00209644	0.0297383	0.367804	1.64494	0	159
GO_LEUKOCYTE_PROLIFERATION	0.010352	0.0843538	0.449046	1.64494	4	50
GO_POSITIVE_REGULATION_OF_CALCIUM_MEDIATED_SIGNALING	0.0199601	0.121847	0.547388	1.64483	9	21
GAANYNYGACNY_UNKNOWN	0.0146444	0.101231	0.469338	1.64478	6	40
MODULE_2	0.00215517	0.0297383	0.360008	1.64454	0	198
GSE7764_IL15_NK_CELL_24H_VS_SPLENOCYTE_DN	0.00209644	0.0297383	0.36754	1.64376	0	159
GSE2706_R848_VS_LPS_2H_STIM_DC_DN	0.00813008	0.0739581	0.417334	1.64348	3	74
WILCOX_RESPONSE_TO_PROGESTERONE_DN	0.0144628	0.101231	0.499456	1.64343	6	29
V$MYCMAX_02	0.00212766	0.0297383	0.37403	1.64311	0	142
GO__DE_NOVO_PROTEIN_FOLDING	0.018595	0.116984	0.571478	1.64308	8	18
GSE18281_MEDULLARY_THYMOCYTE_VS_WHOLE_MEDULLA_THYMUS_DN	0.00214133	0.0297383	0.381795	1.64301	0	123
STEARMAN_LUNG_CANCER_EARLY_VS_LATE_DN	0.0122449	0.092636	0.454511	1.64287	5	46
GSE35685_CD34POS_CD38NEG_VS_CD34POS_CD10POS_BONE_MARROW_DN	0.00211864	0.0297383	0.366623	1.64267	0	164
GO_POSITIVE_REGULATION_OF_ERK1_AND_ERK2_CASCADE	0.00813008	0.0739581	0.417071	1.64244	3	74
GSE25085_FETAL_BM_VS_ADULT_BM_SP4_THYMIC_IMPLANT_UP	0.00210084	0.0297383	0.36519	1.6415	0	166
GO_RESPONSE_TO_VITAMIN_D	0.0265849	0.145906	0.581558	1.64136	12	17
GSE36476_YOUNG_VS_OLD_DONOR_MEMORY_CD4_TCELL_DN	0.00851064	0.0739581	0.441531	1.64108	3	55
PHONG_TNF_TARGETS_UP	0.0122449	0.092636	0.453992	1.64099	5	46
GSE6269_HEALTHY_VS_FLU_INF_PBMC_DN	0.00214592	0.0297383	0.37895	1.64088	0	127
DURAND_STROMA_S_UP	0.00421941	0.0468079	0.38929	1.64085	1	113
GSE27786_NKTCELL_VS_MONO_MAC_UP	0.00211864	0.0297383	0.366108	1.64037	0	164
GARGALOVIC_RESPONSE_TO_OXIDIZED_PHOSPHOLIPIDS_BLUE_DN	0.0185185	0.116888	0.492414	1.64032	8	32
GO_REGULATION_OF_I_KAPPAB_KINASE_NF_KAPPAB_SIGNALING	0.00213675	0.0297383	0.363629	1.64026	0	177
GSE29618_PRE_VS_DAY7_POST_TIV_FLU_VACCINE_BCELL_UP	0.00422833	0.0468079	0.446333	1.64012	1	52
GSE36392_TYPE_2_MYELOID_VS_NEUTROPHIL_IL25_TREATED_LUNG_DN	0.00212766	0.0297383	0.364559	1.63957	0	169
GSE43863_NAIVE_VS_LY6C_LOW_CXCR5NEG_CD4_EFF_TCELL_D6_LCMV_DN	0.00214592	0.0297383	0.378636	1.63952	0	127
GSE26488_WT_VS_HDAC7_KO_DOUBLE_POSITIVE_THYMOCYTE_DN	0.00419287	0.0468079	0.411858	1.63938	1	79
GO_POSITIVE_REGULATION_OF_CELL_DIFFERENTIATION	0.00220264	0.0297993	0.33108	1.63918	0	421
GO_PYRIMIDINE_NUCLEOSIDE_METABOLIC_PROCESS	0.0226804	0.132375	0.490678	1.63904	10	31
GO_PYRIMIDINE_NUCLEOSIDE_TRIPHOSPHATE_BIOSYNTHETIC_PROCESS	0.0215686	0.12714	0.582841	1.63857	10	16
GSE14415_INDUCED_TREG_VS_FOXP3_KO_INDUCED_TREG_IL2_CULTURE_UP	0.00214133	0.0297383	0.374983	1.63853	0	132
GSE30971_CTRL_VS_LPS_STIM_MACROPHAGE_WBP7_HET_2H_DN	0.00209644	0.0297383	0.368366	1.638	0	151
GSE15930_NAIVE_VS_24H_IN_VITRO_STIM_IL12_CD8_TCELL_DN	0.00214592	0.0297383	0.359992	1.63762	0	188
GO_REGULATION_OF_PROTEIN_IMPORT_INTO_NUCLEUS_TRANSLOCATION	0.018595	0.116984	0.569311	1.63685	8	18
GSE17721_CPG_VS_GARDIQUIMOD_6H_BMDC_UP	0.00215054	0.0297383	0.377017	1.63624	0	130
JAATINEN_HEMATOPOIETIC_STEM_CELL_DN	0.00210526	0.0297383	0.374964	1.63601	0	135
GO_POSITIVE_REGULATION_OF_PROTEIN_SECRETION	0.00414079	0.0468079	0.390343	1.63577	1	105
GSE8621_UNSTIM_VS_LPS_PRIMED_AND_LPS_STIM_MACROPHAGE_DN	0.00213675	0.0297383	0.371041	1.63559	0	145
GSE15624_CTRL_VS_6H_HALOFUGINONE_TREATED_CD4_TCELL_DN	0.0021097	0.0297383	0.374507	1.63541	0	136
GSE7852_TREG_VS_TCONV_THYMUS_UP	0.00210084	0.0297383	0.37354	1.63493	0	137
GO_LEUKOCYTE_HOMEOSTASIS	0.010352	0.0843538	0.446285	1.63482	4	50
GO_POSITIVE_REGULATION_OF_PHOSPHATIDYLINOSITOL_3_KINASE_SIGNALING	0.0144628	0.101231	0.49669	1.63433	6	29
GRAHAM_NORMAL_QUIESCENT_VS_NORMAL_DIVIDING_UP	0.0104603	0.0843538	0.449888	1.63422	4	48
SMIRNOV_RESPONSE_TO_IR_6HR_UP	0.00407332	0.0468079	0.390093	1.63411	1	104
GO_ALPHA_AMINO_ACID_BIOSYNTHETIC_PROCESS	0.00851064	0.0739581	0.439588	1.63386	3	55
GSE22886_NAIVE_VS_IGG_IGA_MEMORY_BCELL_DN	0.00209205	0.0297383	0.367107	1.63379	0	156
CHOW_RASSF1_TARGETS_DN	0.024	0.136364	0.506824	1.6335	11	25
GSE24574_BCL6_HIGH_TFH_VS_TCONV_CD4_TCELL_UP	0.00416667	0.0468079	0.387912	1.63096	1	110
GSE17580_UNINFECTED_VS_S_MANSONI_INF_TEFF_UP	0.00211864	0.0297383	0.367829	1.63086	0	153
GSE21927_SPLEEN_C57BL6_VS_EL4_TUMOR_BALBC_MONOCYTES_DN	0.00217391	0.0297383	0.359998	1.63074	0	183
GNF2_BUB3	0.0203666	0.124102	0.499099	1.63066	9	27
GSE21360_PRIMARY_VS_TERTIARY_MEMORY_CD8_TCELL_DN	0.00210084	0.0297383	0.367181	1.63004	0	152
GO_DOUBLE_STRANDED_RNA_BINDING	0.010352	0.0843538	0.444977	1.63003	4	50
GSE23505_IL6_IL1_IL23_VS_IL6_IL1_TGFB_TREATED_CD4_TCELL_UP	0.0021097	0.0297383	0.373214	1.62976	0	136
GO_CELLULAR_CHEMICAL_HOMEOSTASIS	0.00209205	0.0297383	0.342775	1.62937	0	275
GO_RNA_HELICASE_ACTIVITY	0.00209644	0.0297383	0.433206	1.62912	0	60
GSE17721_PAM3CSK4_VS_GADIQUIMOD_16H_BMDC_DN	0.00209205	0.0297383	0.366004	1.62889	0	156
GO_REGULATION_OF_TELOMERE_MAINTENANCE_VIA_TELOMERE_LENGTHENING	0.0142857	0.100882	0.450616	1.62879	6	46
GSE3720_VD1_VS_VD2_GAMMADELTA_TCELL_WITH_PMA_STIM_UP	0.00214133	0.0297383	0.370525	1.62863	0	144
GO_CELLULAR_RESPONSE_TO_ALCOHOL	0.00819672	0.0739581	0.417301	1.62847	3	72
GO_SOMATIC_DIVERSIFICATION_OF_IMMUNE_RECEPTORS_VIA_GERMLINE_RECOMBINATION_WITHIN_A_SINGLE_LOCUS	0.0222672	0.130854	0.503093	1.62815	10	26
GO_SOMATIC_CELL_DNA_RECOMBINATION	0.0222672	0.130854	0.503093	1.62815	10	26
TGATTTRY_V$GFI1_01	0.00410678	0.0468079	0.391872	1.6275	1	101
GO_PEPTIDYL_PROLINE_MODIFICATION	0.0209205	0.125514	0.472422	1.62722	9	37
GSE2706_R848_VS_R848_AND_LPS_2H_STIM_DC_DN	0.00414938	0.0468079	0.393002	1.627	1	100
GSE36888_UNTREATED_VS_IL2_TREATED_TCELL_17H_UP	0.00210084	0.0297383	0.366834	1.62695	0	148
GSE37301_LYMPHOID_PRIMED_MPP_VS_COMMON_LYMPHOID_PROGENITOR_DN	0.00209205	0.0297383	0.365523	1.62674	0	156
GSE2405_0H_VS_3H_A_PHAGOCYTOPHILUM_STIM_NEUTROPHIL_DN	0.0122449	0.092636	0.453979	1.62643	5	44
GO_REGULATION_OF_PROTEIN_BINDING	0.00215054	0.0297383	0.37905	1.62539	0	122
GSE23502_BM_VS_COLON_TUMOR_HDC_KO_MYELOID_DERIVED_SUPPRESSOR_CELL_DN	0.0021097	0.0297383	0.363309	1.62468	0	160
IGLESIAS_E2F_TARGETS_UP	0.00414938	0.0468079	0.386227	1.62433	1	108
TONKS_TARGETS_OF_RUNX1_RUNX1T1_FUSION_GRANULOCYTE_UP	0.0205761	0.124923	0.487578	1.62421	9	32
GO_CELLULAR_RESPONSE_TO_INTERFERON_GAMMA	0.00639659	0.0620794	0.440534	1.62396	2	53
GO_RRNA_METABOLIC_PROCESS	0.00213675	0.0297383	0.344978	1.62338	0	240
GSE42021_TREG_PLN_VS_TREG_PRECURSORS_THYMUS_DN	0.0021322	0.0297383	0.372952	1.62245	0	128
GSE36888_STAT5_AB_KNOCKIN_VS_WT_TCELL_IL2_TREATED_2H_UP	0.00215983	0.0297383	0.369777	1.62207	0	143
GARY_CD5_TARGETS_DN	0.00218341	0.0297383	0.329163	1.62199	0	390
GSE37532_TREG_VS_TCONV_PPARG_KO_CD4_TCELL_FROM_VISCERAL_ADIPOSE_TISSUE_UP	0.0021322	0.0297383	0.367452	1.62173	0	147
BASSO_B_LYMPHOCYTE_NETWORK	0.00212766	0.0297383	0.374889	1.62172	0	126
GSE12392_WT_VS_IFNB_KO_CD8A_POS_SPLEEN_DC_DN	0.00414938	0.0468079	0.391718	1.62169	1	100
CHICAS_RB1_TARGETS_SENESCENT	0.00215983	0.0297383	0.330394	1.62152	0	368
GO_CELLULAR_RESPONSE_TO_STEROID_HORMONE_STIMULUS	0.0021322	0.0297383	0.372589	1.62087	0	128
KAECH_DAY8_EFF_VS_MEMORY_CD8_TCELL_DN	0.00210084	0.0297383	0.360495	1.6204	0	166
BOSCO_ALLERGEN_INDUCED_TH2_ASSOCIATED_MODULE	0.00414938	0.0468079	0.391331	1.62009	1	100
GSE25088_IL4_VS_IL4_AND_ROSIGLITAZONE_STIM_MACROPHAGE_DAY10_UP	0.0021097	0.0297383	0.36894	1.61988	0	140
GSE2770_UNTREATED_VS_TGFB_AND_IL12_TREATED_ACT_CD4_TCELL_6H_DN	0.00410678	0.0468079	0.392395	1.61976	1	97
KEGG_ARGININE_AND_PROLINE_METABOLISM	0.0182927	0.11601	0.480687	1.6197	8	33
GO_REGULATION_OF_VASCULAR_ENDOTHELIAL_GROWTH_FACTOR_PRODUCTION	0.028169	0.150283	0.547901	1.61956	13	20
GSE22886_NAIVE_TCELL_VS_MONOCYTE_UP	0.00214592	0.0297383	0.374004	1.61946	0	127
GO_CELLULAR_RESPONSE_TO_INTERLEUKIN_6	0.03	0.155765	0.587288	1.61892	14	15
GO_RESPONSE_TO_INTERLEUKIN_6	0.03	0.155765	0.587288	1.61892	14	15
GSE19941_UNSTIM_VS_LPS_STIM_IL10_KO_MACROPHAGE_UP	0.00622407	0.0620794	0.3918	1.61876	2	96
GO_REGULATION_OF_DNA_BIOSYNTHETIC_PROCESS	0.00816327	0.0739581	0.41267	1.61851	3	73
GSE13493_DP_VS_CD4INTCD8POS_THYMOCYTE_DN	0.00212766	0.0297383	0.369129	1.61849	0	141
BILANGES_RAPAMYCIN_SENSITIVE_VIA_TSC1_AND_TSC2	0.00416667	0.0468079	0.429027	1.61831	1	61
PEREZ_TP63_TARGETS	0.00210084	0.0297383	0.364756	1.61773	0	148
MORF_EI24	0.0021097	0.0297383	0.370354	1.61727	0	136
GSE17974_CTRL_VS_ACT_IL4_AND_ANTI_IL12_0.5H_CD4_TCELL_UP	0.00634249	0.0620794	0.440089	1.61717	2	52
KEGG_COMPLEMENT_AND_COAGULATION_CASCADES	0.028169	0.150283	0.546997	1.61688	13	20
GSE36888_UNTREATED_VS_IL2_TREATED_STAT5_AB_KNOCKIN_TCELL_6H_DN	0.00207039	0.0297383	0.362334	1.61686	0	157
GO_CARDIAC_MUSCLE_TISSUE_DEVELOPMENT	0.00209644	0.0297383	0.429736	1.61607	0	60
GO_REGULATION_OF_LEUKOCYTE_DIFFERENTIATION	0.00215983	0.0297383	0.368403	1.61604	0	143
GO_REGULATION_OF_NITRIC_OXIDE_BIOSYNTHETIC_PROCESS	0.022869	0.132803	0.470744	1.61586	10	36
REACTOME_CELL_SURFACE_INTERACTIONS_AT_THE_VASCULAR_WALL	0.00431965	0.0468196	0.433209	1.61582	1	58
FRIDMAN_IMMORTALIZATION_DN	0.0281124	0.150161	0.552034	1.61571	13	19
MODULE_5	0.00215054	0.0297383	0.341785	1.61558	0	266
GO_POSITIVE_REGULATION_OF_TYPE_I_INTERFERON_PRODUCTION	0.00614754	0.0620794	0.418491	1.61537	2	67
REACTOME_SLC_MEDIATED_TRANSMEMBRANE_TRANSPORT	0.00421053	0.0468079	0.381351	1.61529	1	114
GO_RESPONSE_TO_COLD	0.0222672	0.130854	0.498921	1.61465	10	26
GO_POSITIVE_REGULATION_OF_ESTABLISHMENT_OF_PROTEIN_LOCALIZATION	0.00210084	0.0297383	0.333004	1.61315	0	307
MATSUDA_NATURAL_KILLER_DIFFERENTIATION	0.0021692	0.0297383	0.331617	1.61313	0	337
FULCHER_INFLAMMATORY_RESPONSE_LECTIN_VS_LPS_DN	0.00217391	0.0297383	0.331617	1.61306	0	334
SCHLOSSER_MYC_TARGETS_AND_SERUM_RESPONSE_UP	0.0124224	0.092636	0.452578	1.61288	5	43
GO_MULTI_MULTICELLULAR_ORGANISM_PROCESS	0.00835073	0.0739581	0.396709	1.61247	3	89
[truncated: 12,451 more rows]

## Sheet: 20954 Dox vs V
Supplementary Table 4d: GSEA comparing bone marrow macrophages from DFBL-20954 bearing mice treated with Doxorubicin (D) or PBS (V). Positive enrichment scores indicate gene sets expressed higher in D as compared to PBS determined by the ordering of the rank ordered differential expression lists.
[truncated: 13,376 more rows]

[truncated: 7 more sheets: 20954 V vs Uneng, 69487 A vs V, 69487 Combo vs V, 69487 CTX vs V, 69487 Dox vs V, 69487 V vs Uneng, Uneng + CTX vs Uneng]
